# Supplementary material for: An efficient method for high-pH peptide fractionation based on C18 StageTips for in-depth proteome profiling
Source: Royal Society of Chemistry journal article supplement (doi:10.1039/c9ay01269a), 2019-01-01
Supplement: c9ay01269a1.pdf [file c9ay01269a1.pdf]

(A)

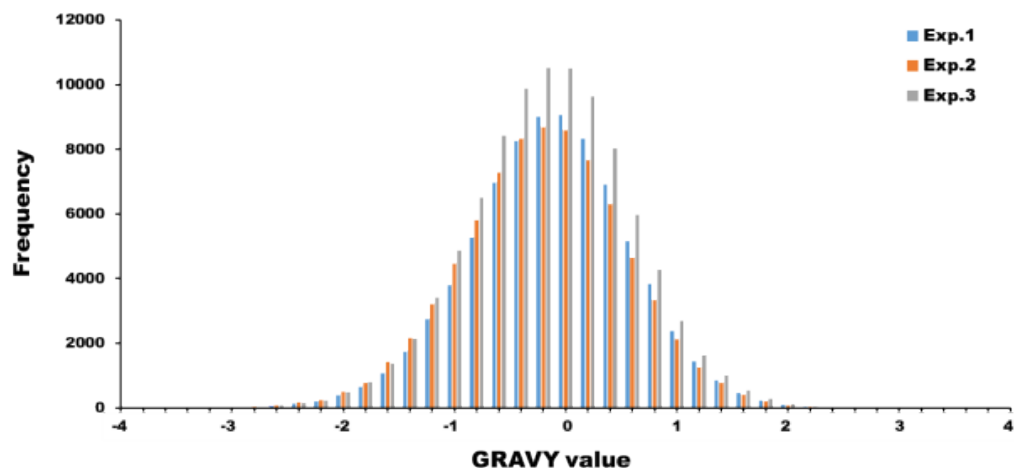

(B)

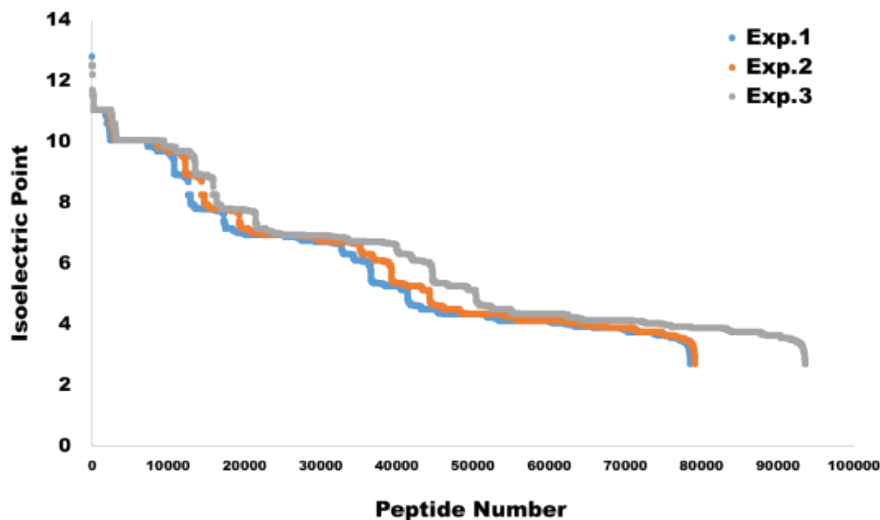

### Supplementary Figure S1. Physicochemical properties of identified peptides.

(A) Histograms of the hydrophathy (GRAVY value) of the peptides identified in each method. (B) Waterfall plot of isoelectric points for the peptides identified in each fractionation method.

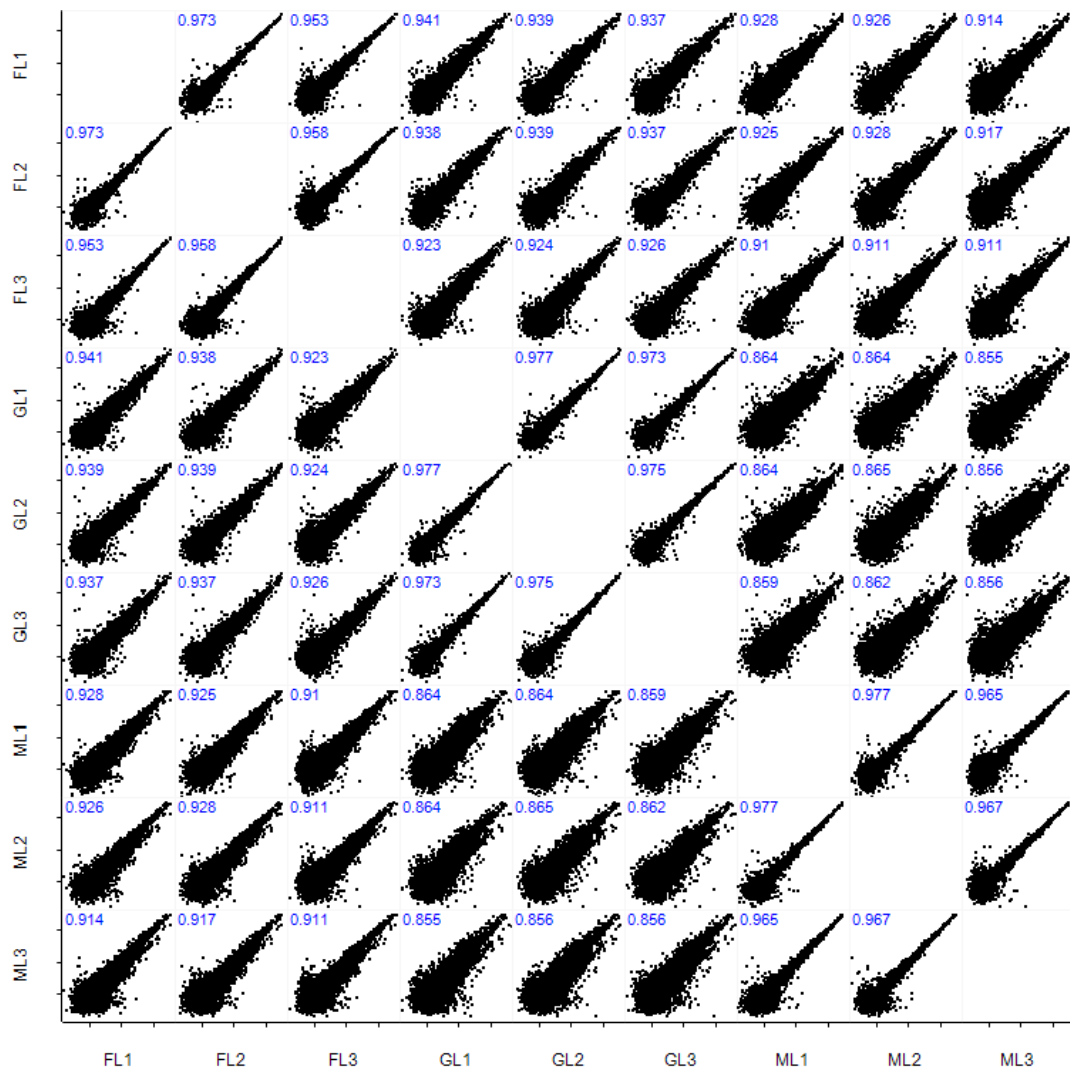

**Supplementary Figure S2. Correlation between sub-regions of mouse brain cerebellum.**

Reproducibility of three biological replicates of the three sub-regions is represented by  $R^2$  correlation values. Three sub-regions include the flocculus (FL), the molecular layer (ML), and the granular layer (GL).

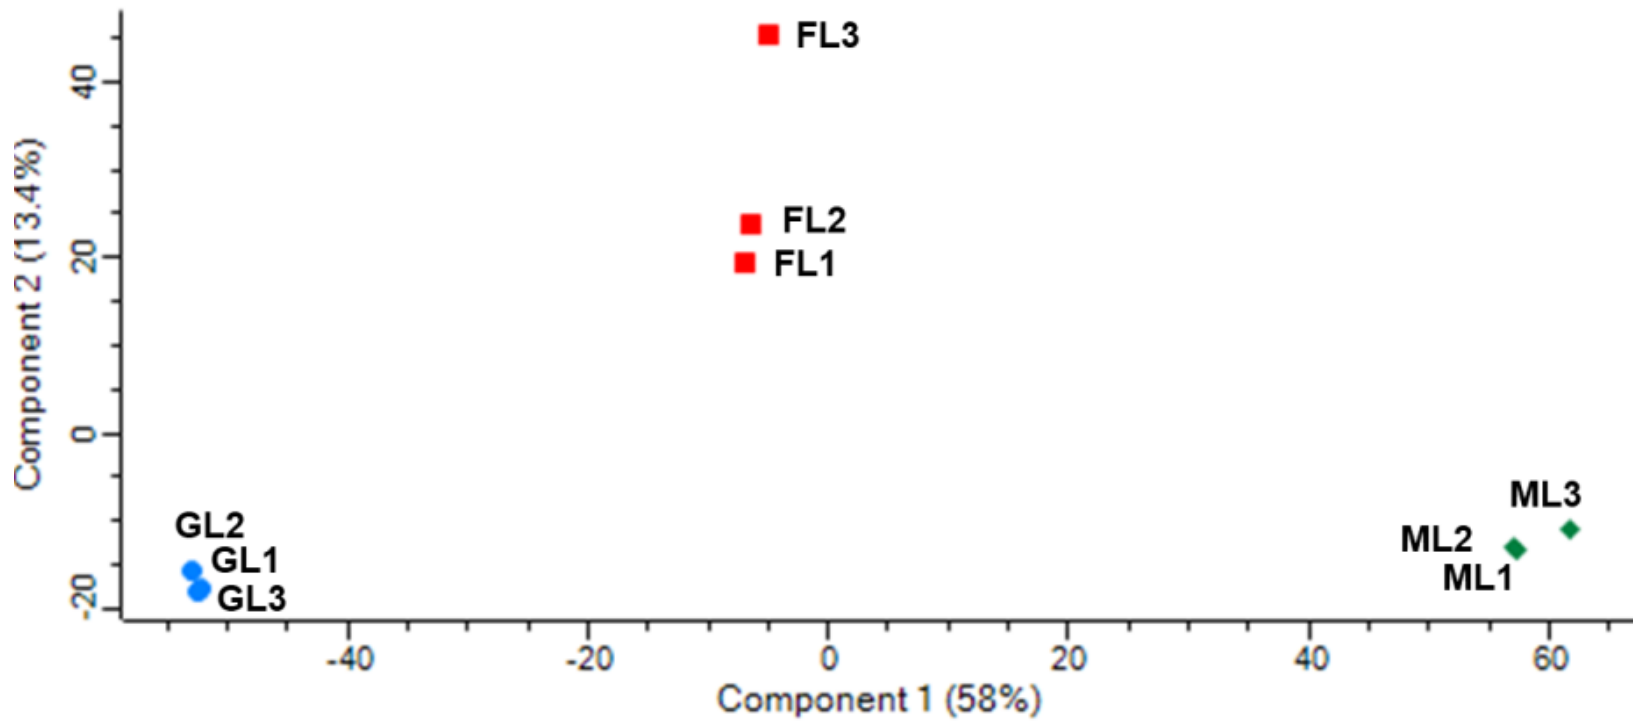

**Supplementary Figure S3. PCA analysis of three sub-regions in mouse cerebellum.**

PCA shows a distinct separation of clusters across the three sub-regions in mouse cerebellum. Three sub-regions include the flocculus (FL), the molecular layer (ML), and the granular layer (GL).

**Mouse brain proteome atlas  
(Sharma et al. 2015)**

**Our proteome**

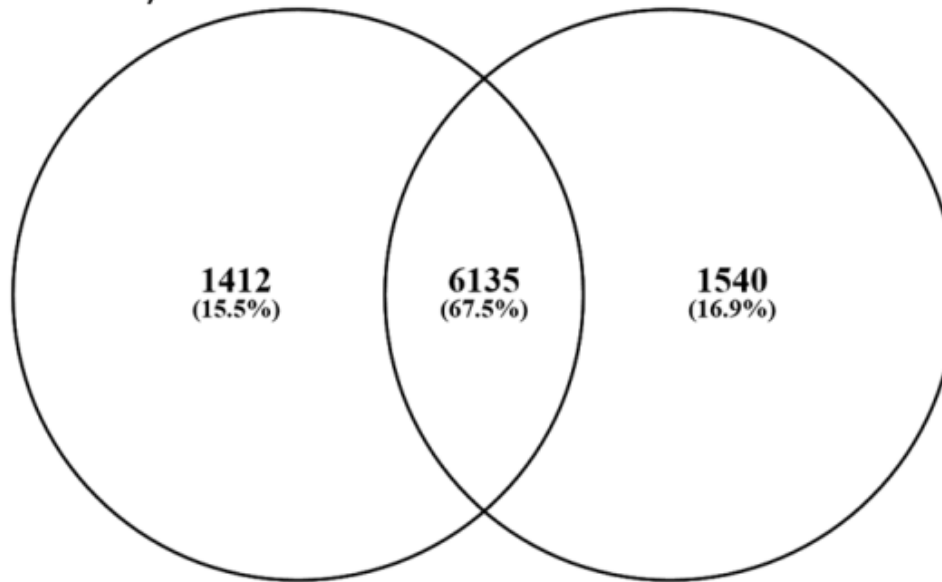

**Supplementary Figure S4. Comparison between our proteome and mouse brain proteome atlas.**

The accession numbers for the proteins identified in these studies have been changed to gene symbols.
