# Supplementary material for: An efficient method for high-pH peptide fractionation based on C18 StageTips for in-depth proteome profiling
Source: Royal Society of Chemistry journal article supplement (doi:10.1039/c9ay01269a), 2019-01-01
Supplement: c9ay01269a2.xlsx [file c9ay01269a2.xlsx]

## Sheet: supplementary_table_S1
Supplementary Table S1. List of identified protein groups in prelimary expriment 1. This list includes the Uniprot accession nubmer, official gene symbol, and protein name of the identified protein groups. Searh results from Maxquant are also described.
No.	Protein IDs	Majority protein IDs	Protein names	Gene names	Fasta headers	Intensity C18AQ	Intensity R2	iBAQ	iBAQ C18AQ	iBAQ R2	LFQ intensity C18AQ	LFQ intensity R2	Peptides	Razor + unique peptides	Unique peptides	Sequence coverage [%]	Unique + razor sequence coverage [%]	Unique sequence coverage [%]	Mol. weight [kDa]	Q-value	Score	Intensity	MS/MS count	Sequence coverage C18AQ [%]	Sequence coverage R2 [%]	MS/MS count C18AQ	MS/MS count R2	Number of proteins	Peptides C18AQ	Peptides R2	Razor + unique peptides C18AQ	Razor + unique peptides R2	Unique peptides C18AQ	Unique peptides R2
1	A0A024QZX5;A0A087X1N8;P35237	A0A024QZX5;A0A087X1N8;P35237	Serpin B6	SERPINB6	tr|A0A024QZX5|A0A024QZX5_HUMAN Serpin B6 OS=Homo sapiens GN=SERPINB6 PE=1 SV=1;tr|A0A087X1N8|A0A087X1N8_HUMAN Serpin B6 OS=Homo sapiens GN=SERPINB6 PE=1 SV=1;sp|P35237|SPB6_HUMAN Serpin B6 OS=Homo sapiens GN=SERPINB6 PE=1 SV=3	35213000	0	1467200	1467200	0	32810000	0	3	3	3	10.3	10.3	10.3	43.024	0	7.5624	35213000	4	10.3	0	4	0	3	3	0	3	0	3	0
2	A0A087WZA9;A0A024R4K9;A0A087X266;Q9BXJ8-2;Q9BXJ8	A0A087WZA9;A0A024R4K9;A0A087X266;Q9BXJ8-2;Q9BXJ8	Transmembrane protein 120A	TMEM120A;TMPIT	tr|A0A087WZA9|A0A087WZA9_HUMAN Transmembrane protein 120A (Fragment) OS=Homo sapiens GN=TMEM120A PE=4 SV=1;tr|A0A024R4K9|A0A024R4K9_HUMAN Transmembrane protein 120A OS=Homo sapiens GN=TMPIT PE=4 SV=1;tr|A0A087X266|A0A087X266_HUMAN Transmembrane protein 120	434210000	218870000	54423000	36184000	18239000	385360000	283840000	7	7	7	46	46	46	20.459	0	32.635	653080000	22	33.3	41.4	7	15	5	5	6	5	6	5	6
3	A0A024R571;Q9H4M9;C9JC03;C9J2Z4;C9JDQ8;Q9NZN3;C9JIJ3;C9IZH1;A0A087WUA5;Q9H223	A0A024R571;Q9H4M9;C9JC03;C9J2Z4	EH domain-containing protein 1	EHD1	tr|A0A024R571|A0A024R571_HUMAN EH domain-containing protein 1 OS=Homo sapiens GN=EHD1 PE=1 SV=1;sp|Q9H4M9|EHD1_HUMAN EH domain-containing protein 1 OS=Homo sapiens GN=EHD1 PE=1 SV=2;tr|C9JC03|C9JC03_HUMAN EH domain-containing protein 1 (Fragment) OS=Homo s	99548000	47096000	4443700	3016600	1427100	65453000	79960000	7	7	7	22.3	22.3	22.3	61.927	0	10.166	146640000	11	22.3	14.8	8	3	10	7	4	7	4	7	4
4	A0A075B6F3;Q96JB1-2;Q96JB1;H0Y7V4	A0A075B6F3;Q96JB1-2;Q96JB1;H0Y7V4	Dynein heavy chain 8, axonemal	DNAH8	tr|A0A075B6F3|A0A075B6F3_HUMAN Dynein heavy chain 8, axonemal OS=Homo sapiens GN=DNAH8 PE=1 SV=2;sp|Q96JB1-2|DYH8_HUMAN Isoform 2 of Dynein heavy chain 8, axonemal OS=Homo sapiens GN=DNAH8;sp|Q96JB1|DYH8_HUMAN Dynein heavy chain 8, axonemal OS=Homo sapiens	872710000	510570000	4689100	2958300	1730700	488940000	333420000	3	3	3	0.9	0.9	0.9	538.59	0.00029334	4.8056	1383300000	8	0.9	0.4	4	4	4	3	2	3	2	3	2
5	A0A087WV90;E9PDN5;A0A087WTU7;A0A075B6G3;P11532-4;P11532;E7EQR9;F5GZY3;E7EQS5;F8VX32;E7ESB2;H0Y304;P11532-10;P11532-9;P11532-8;P11532-7;P11532-5;P11532-6;P11532-3;P11532-2;H0Y3E8;Q4G0X0	A0A087WV90;E9PDN5;A0A087WTU7;A0A075B6G3;P11532-4;P11532;E7EQR9;F5GZY3;E7EQS5;F8VX32;E7ESB2;H0Y304;P11532-10;P11532-9;P11532-8;P11532-7;P11532-5;P11532-6;P11532-3;P11532-2;H0Y3E8	Dystrophin	DMD	tr|A0A087WV90|A0A087WV90_HUMAN Dystrophin OS=Homo sapiens GN=DMD PE=1 SV=1;tr|E9PDN5|E9PDN5_HUMAN Dystrophin OS=Homo sapiens GN=DMD PE=1 SV=1;tr|A0A087WTU7|A0A087WTU7_HUMAN Dystrophin OS=Homo sapiens GN=DMD PE=1 SV=1;tr|A0A075B6G3|A0A075B6G3_HUMAN Dystroph	55235000	247330000	1304200	238080	1066100	158810000	131680000	7	6	6	2.7	2.4	2.4	426.09	0	33.064	302560000	10	2	2	5	5	22	5	5	4	5	4	5
6	A0A075B746;P82921	A0A075B746;P82921	28S ribosomal protein S21, mitochondrial	MRPS21	tr|A0A075B746|A0A075B746_HUMAN 28S ribosomal protein S21, mitochondrial OS=Homo sapiens GN=MRPS21 PE=1 SV=1;sp|P82921|RT21_HUMAN 28S ribosomal protein S21, mitochondrial OS=Homo sapiens GN=MRPS21 PE=1 SV=2	33245000	79259000	22501000	6649100	15852000	25781000	66641000	4	4	4	46	46	46	10.688	0	9.0567	112500000	11	20.7	46	6	5	2	2	4	2	4	2	4
7	A0A075B773;O00623	A0A075B773;O00623	Peroxisome assembly protein 12	PEX12	tr|A0A075B773|A0A075B773_HUMAN Peroxisome assembly protein 12 OS=Homo sapiens GN=PEX12 PE=4 SV=1;sp|O00623|PEX12_HUMAN Peroxisome assembly protein 12 OS=Homo sapiens GN=PEX12 PE=1 SV=1	39955000	20649000	3030200	1997700	1032500	0	26162000	2	2	2	12.3	12.3	12.3	40.683	0.0024746	2.5603	60604000	2	5.3	7	1	1	2	1	1	1	1	1	1
8	A0A075B784;Q9P275;Q9P275-2;K7EMM6;E9PEW0	A0A075B784;Q9P275;Q9P275-2;K7EMM6;E9PEW0	Ubiquitin carboxyl-terminal hydrolase;Ubiquitin carboxyl-terminal hydrolase 36	USP36	tr|A0A075B784|A0A075B784_HUMAN Ubiquitin carboxyl-terminal hydrolase 36 OS=Homo sapiens GN=USP36 PE=1 SV=1;sp|Q9P275|UBP36_HUMAN Ubiquitin carboxyl-terminal hydrolase 36 OS=Homo sapiens GN=USP36 PE=1 SV=3;sp|Q9P275-2|UBP36_HUMAN Isoform 2 of Ubiquitin carb	22676000	80785000	1616600	354320	1262300	54573000	73972000	4	4	4	5.2	5.2	5.2	104.39	0	11.395	103460000	6	1.9	5.2	2	4	5	1	4	1	4	1	4
9	A0A075B7D9;Q92804-2;Q92804;A0A075B7F4	A0A075B7D9;Q92804-2;Q92804	TATA-binding protein-associated factor 2N	TAF15	tr|A0A075B7D9|A0A075B7D9_HUMAN TATA-binding protein-associated factor 2N OS=Homo sapiens GN=TAF15 PE=1 SV=1;sp|Q92804-2|RBP56_HUMAN Isoform Short of TATA-binding protein-associated factor 2N OS=Homo sapiens GN=TAF15;sp|Q92804|RBP56_HUMAN TATA-binding prote	139990000	94920000	11186000	6666000	4520000	115780000	153510000	4	3	3	7.8	7.8	7.8	48.839	0	23.156	234910000	18	7.8	7.8	10	8	4	4	3	3	2	3	2
10	A0A075B7F8;A8CG34;Q96HA1;A0A087WY75;Q96HA1-2;A8CG34-2;Q96HA1-3;C9JFL1	A0A075B7F8;A8CG34;Q96HA1	Nuclear envelope pore membrane protein POM 121C;Nuclear envelope pore membrane protein POM 121	POM121C;POM121	tr|A0A075B7F8|A0A075B7F8_HUMAN Nuclear envelope pore membrane protein POM 121C OS=Homo sapiens GN=POM121C PE=1 SV=2;sp|A8CG34|P121C_HUMAN Nuclear envelope pore membrane protein POM 121C OS=Homo sapiens GN=POM121C PE=1 SV=2;sp|Q96HA1|P121A_HUMAN Nuclear env	100330000	88660000	4609600	2447100	2162400	135210000	72540000	5	5	5	6.3	6.3	6.3	125.09	0	13.579	188990000	14	5.8	6.3	6	8	8	4	5	4	5	4	5
11	E9PKG6;V9HW75;A0A087WSV8;P80303-2;P80303;Q2L696;E9PM22;E9PLR0;E9PLE9;E9PJP3;H0YD18;H0YEG8	E9PKG6;V9HW75;A0A087WSV8;P80303-2;P80303;Q2L696;E9PM22;E9PLR0;E9PLE9;E9PJP3	Nucleobindin-2;Nesfatin-1	NUCB2;HEL-S-109;Nucb2	tr|E9PKG6|E9PKG6_HUMAN Nucleobindin-2 OS=Homo sapiens GN=NUCB2 PE=4 SV=2;tr|V9HW75|V9HW75_HUMAN Epididymis secretory protein Li 109 OS=Homo sapiens GN=HEL-S-109 PE=2 SV=1;tr|A0A087WSV8|A0A087WSV8_HUMAN Nucleobindin 2, isoform CRA_b OS=Homo sapiens GN=NUCB2	672550000	744280000	74570000	35398000	39173000	693370000	619020000	6	6	6	20.4	20.4	20.4	40.368	0	17.522	1416800000	26	17.2	19.5	11	15	12	5	5	5	5	5	5
12	E9PIR7;F8W809;A0A087WSW9;E9PNQ6;A0A087WSY9;Q16881-5;Q16881-2;Q16881-4;Q16881-3;Q16881-6;Q16881;E2QRB9;Q16881-7;E9PKD3;E9PLT3;E9PKI4;E9PIZ5;E9PQI3	E9PIR7;F8W809;A0A087WSW9;E9PNQ6;A0A087WSY9;Q16881-5;Q16881-2;Q16881-4;Q16881-3;Q16881-6;Q16881;E2QRB9;Q16881-7;E9PKD3	Thioredoxin reductase 1, cytoplasmic	TXNRD1	tr|E9PIR7|E9PIR7_HUMAN Thioredoxin reductase 1, cytoplasmic OS=Homo sapiens GN=TXNRD1 PE=3 SV=1;tr|F8W809|F8W809_HUMAN Thioredoxin reductase 1, cytoplasmic OS=Homo sapiens GN=TXNRD1 PE=4 SV=1;tr|A0A087WSW9|A0A087WSW9_HUMAN Thioredoxin reductase 1, cytoplas	17060000	8481800	912210	609290	302920	12618000	0	5	4	4	22	18.9	18.9	53.166	0	22.505	25542000	4	18.9	6.2	4	0	18	4	2	4	1	4	1
13	K7ERP4;R4GNE4;K7ENB4;K7EKX7;A0A087X2I2;A0A087WT12;K7EJ20;P36969-2;P36969	K7ERP4;R4GNE4;K7ENB4;K7EKX7;A0A087X2I2;A0A087WT12;K7EJ20;P36969-2;P36969	Glutathione peroxidase;Phospholipid hydroperoxide glutathione peroxidase, mitochondrial	GPX4	tr|K7ERP4|K7ERP4_HUMAN Glutathione peroxidase (Fragment) OS=Homo sapiens GN=GPX4 PE=1 SV=1;tr|R4GNE4|R4GNE4_HUMAN Glutathione peroxidase (Fragment) OS=Homo sapiens GN=GPX4 PE=1 SV=2;tr|K7ENB4|K7ENB4_HUMAN Glutathione peroxidase OS=Homo sapiens GN=GPX4 PE=1	11994000	0	922640	922640	0	7615200	0	1	1	1	7.1	7.1	7.1	17.629	0.00079936	3.3203	11994000	2	7.1	7.1	1	1	9	1	1	1	1	1	1
14	A0A087WT20;Q9NV06;B3KME9;A0A087X1F8;E5RHM4	A0A087WT20;Q9NV06;B3KME9	DDB1- and CUL4-associated factor 13	DCAF13	tr|A0A087WT20|A0A087WT20_HUMAN DDB1- and CUL4-associated factor 13 OS=Homo sapiens GN=DCAF13 PE=1 SV=1;sp|Q9NV06|DCA13_HUMAN DDB1- and CUL4-associated factor 13 OS=Homo sapiens GN=DCAF13 PE=1 SV=2;tr|B3KME9|B3KME9_HUMAN DDB1- and CUL4-associated factor 13	737220000	916450000	37584000	16755000	20829000	672510000	844880000	14	14	14	27.8	27.8	27.8	67.55	0	194.23	1653700000	62	25.5	26.6	27	35	5	13	12	13	12	13	12
15	H0Y8I3;H0Y987;A0A087WT27;J3KN95;O95394;O95394-3;O95394-4	H0Y8I3;H0Y987;A0A087WT27;J3KN95;O95394;O95394-3;O95394-4	Phosphoacetylglucosamine mutase	PGM3	tr|H0Y8I3|H0Y8I3_HUMAN Phosphoacetylglucosamine mutase (Fragment) OS=Homo sapiens GN=PGM3 PE=1 SV=1;tr|H0Y987|H0Y987_HUMAN Phosphoacetylglucosamine mutase (Fragment) OS=Homo sapiens GN=PGM3 PE=1 SV=1;tr|A0A087WT27|A0A087WT27_HUMAN Phosphoacetylglucosamine	53870000	17236000	14221000	10774000	3447200	48634000	0	2	2	2	26.5	26.5	26.5	12.315	0.00054735	3.6919	71106000	1	26.5	15	1	0	7	2	1	2	1	2	1
16	A0A087WTA5;E7ERK9;Q9UI10-3;Q9UI10;Q9UI10-2;A0A087WW69;H7C2L8;F8W8L6	A0A087WTA5;E7ERK9;Q9UI10-3;Q9UI10;Q9UI10-2	Translation initiation factor eIF-2B subunit delta	EIF2B4	tr|A0A087WTA5|A0A087WTA5_HUMAN Translation initiation factor eIF-2B subunit delta OS=Homo sapiens GN=EIF2B4 PE=1 SV=1;tr|E7ERK9|E7ERK9_HUMAN Translation initiation factor eIF-2B subunit delta OS=Homo sapiens GN=EIF2B4 PE=1 SV=1;sp|Q9UI10-3|EI2BD_HUMAN Isof	120230000	73720000	6926800	4294000	2632900	142230000	76155000	8	8	8	23.7	23.7	23.7	57.495	0	15.887	193950000	15	19	14.8	8	7	8	6	5	6	5	6	5
17	D6RCT6;A0A087WTC6;D6RIA0;D6R9E3;Q9BWT6	D6RCT6;A0A087WTC6;D6RIA0;D6R9E3;Q9BWT6	Meiotic nuclear division protein 1 homolog	MND1	tr|D6RCT6|D6RCT6_HUMAN Meiotic nuclear division protein 1 homolog (Fragment) OS=Homo sapiens GN=MND1 PE=1 SV=1;tr|A0A087WTC6|A0A087WTC6_HUMAN Meiotic nuclear division protein 1 homolog OS=Homo sapiens GN=MND1 PE=1 SV=1;tr|D6RIA0|D6RIA0_HUMAN Meiotic nuclea	21769000	29460000	7318500	3109900	4208600	13821000	28263000	1	1	1	9.8	9.8	9.8	11.544	0.0082723	1.9909	51229000	3	9.8	9.8	2	1	5	1	1	1	1	1	1
18	Q5T985;A0A087WTE1;P19823;Q5T987	Q5T985;A0A087WTE1;P19823	Inter-alpha-trypsin inhibitor heavy chain H2	ITIH2	tr|Q5T985|Q5T985_HUMAN Inter-alpha-trypsin inhibitor heavy chain H2 OS=Homo sapiens GN=ITIH2 PE=1 SV=1;tr|A0A087WTE1|A0A087WTE1_HUMAN Inter-alpha-trypsin inhibitor heavy chain H2 OS=Homo sapiens GN=ITIH2 PE=1 SV=1;sp|P19823|ITIH2_HUMAN Inter-alpha-trypsin	1036100000	1061800000	41135000	20316000	20819000	1344600000	1066600000	20	20	15	33.4	33.4	26.7	105.21	0	107.48	2097900000	88	31.8	23.2	48	40	4	18	14	18	14	13	10
19	E7EWC7;A0A087WTE7;C9JMY0;A0A087WUE4;Q96PV6;Q96PV6-2	E7EWC7;A0A087WTE7;C9JMY0;A0A087WUE4;Q96PV6;Q96PV6-2	Leukocyte receptor cluster member 8	LENG8	tr|E7EWC7|E7EWC7_HUMAN Leukocyte receptor cluster member 8 (Fragment) OS=Homo sapiens GN=LENG8 PE=1 SV=1;tr|A0A087WTE7|A0A087WTE7_HUMAN Leukocyte receptor cluster member 8 OS=Homo sapiens GN=LENG8 PE=1 SV=1;tr|C9JMY0|C9JMY0_HUMAN Leukocyte receptor cluster	22397000	7335900	2703000	2036100	666900	16459000	17329000	1	1	1	9.7	9.7	9.7	32.255	0	9.7345	29733000	4	9.7	9.7	3	1	6	1	1	1	1	1	1
20	A0A087WZ85;A0A087WTM1;Q9Y6N7-6;Q9Y6N7-5;Q9Y6N7-4;Q9Y6N7-3;Q9Y6N7;Q9Y6N7-2	A0A087WZ85;A0A087WTM1;Q9Y6N7-6;Q9Y6N7-5;Q9Y6N7-4;Q9Y6N7-3;Q9Y6N7;Q9Y6N7-2	Roundabout homolog 1	ROBO1	tr|A0A087WZ85|A0A087WZ85_HUMAN Roundabout homolog 1 OS=Homo sapiens GN=ROBO1 PE=1 SV=1;tr|A0A087WTM1|A0A087WTM1_HUMAN Roundabout homolog 1 OS=Homo sapiens GN=ROBO1 PE=1 SV=1;sp|Q9Y6N7-6|ROBO1_HUMAN Isoform 6 of Roundabout homolog 1 OS=Homo sapiens GN=ROBO1	17353000	0	234500	234500	0	12834000	0	4	4	4	4.6	4.6	4.6	166.73	0	10.148	17353000	4	2.2	2.4	2	2	8	2	2	2	2	2	2
21	A0A087WTM7;A8MUN2;G3V186;REV__H0YCZ2;REV__Q8NG31-2;REV__Q8NG31;Q9ULK0	A0A087WTM7		APOB	tr|A0A087WTM7|A0A087WTM7_HUMAN Apolipoprotein B-100 OS=Homo sapiens GN=APOB PE=1 SV=1	70491000	70280000	506370	253570	252810	74343000	62811000	171	1	1	48.8	0.3	0.3	489.83	0	16.448	140770000	8	44.1	42.7	3	5	7	155	142	1	1	1	1
22	A0A087WTN3;A0A087WVA1;P62341;F8WBD0;Q6IAK0	A0A087WTN3;A0A087WVA1;P62341;F8WBD0;Q6IAK0	Selenoprotein T	SELT	tr|A0A087WTN3|A0A087WTN3_HUMAN Selenoprotein T OS=Homo sapiens GN=SELT PE=4 SV=1;tr|A0A087WVA1|A0A087WVA1_HUMAN Selenoprotein T OS=Homo sapiens GN=SELT PE=4 SV=1;sp|P62341|SELT_HUMAN Selenoprotein T OS=Homo sapiens GN=SELT PE=2 SV=2;tr|F8WBD0|F8WBD0_HUMAN	0	14569000	1618800	0	1618800	0	14690000	2	2	2	19.1	19.1	19.1	18.826	0.00029833	5.2221	14569000	5	0	19.1	0	5	5	0	2	0	2	0	2
23	Q5JWB9;A0A087WTT2;Q96A57;Q96A57-2	Q5JWB9;A0A087WTT2;Q96A57;Q96A57-2	Transmembrane protein 230	TMEM230	tr|Q5JWB9|Q5JWB9_HUMAN Transmembrane protein 230 (Fragment) OS=Homo sapiens GN=TMEM230 PE=1 SV=1;tr|A0A087WTT2|A0A087WTT2_HUMAN Transmembrane protein 230 OS=Homo sapiens GN=TMEM230 PE=1 SV=1;sp|Q96A57|TM230_HUMAN Transmembrane protein 230 OS=Homo sapiens G	123460000	73593000	65684000	41153000	24531000	89725000	96645000	1	1	1	14.9	14.9	14.9	7.9924	0.00127	2.8086	197050000	5	14.9	14.9	3	2	4	1	1	1	1	1	1
24	A0A087WVR3;A0A087WTW0;Q96T88;Q96T88-2;A0A087WWG9	A0A087WVR3;A0A087WTW0;Q96T88;Q96T88-2;A0A087WWG9	E3 ubiquitin-protein ligase UHRF1	UHRF1	tr|A0A087WVR3|A0A087WVR3_HUMAN E3 ubiquitin-protein ligase UHRF1 OS=Homo sapiens GN=UHRF1 PE=1 SV=1;tr|A0A087WTW0|A0A087WTW0_HUMAN E3 ubiquitin-protein ligase UHRF1 OS=Homo sapiens GN=UHRF1 PE=1 SV=1;sp|Q96T88|UHRF1_HUMAN E3 ubiquitin-protein ligase UHRF1	412510000	185440000	13288000	9167000	4120900	320900000	272840000	14	14	13	21	21	19.7	91.099	0	49.368	597950000	38	20.1	17	19	19	5	13	10	13	10	12	9
25	A0A087WTX2;Q92504	A0A087WTX2;Q92504	Zinc transporter SLC39A7	SLC39A7	tr|A0A087WTX2|A0A087WTX2_HUMAN Zinc transporter SLC39A7 OS=Homo sapiens GN=SLC39A7 PE=1 SV=1;sp|Q92504|S39A7_HUMAN Zinc transporter SLC39A7 OS=Homo sapiens GN=SLC39A7 PE=1 SV=2	323620000	285700000	60932000	32362000	28570000	320260000	247040000	1	1	1	3.3	3.3	3.3	46.393	0	10.277	609320000	5	3.3	3.3	2	3	2	1	1	1	1	1	1
26	A0A087WTZ5;E9PJ81;E9PRQ7;Q04323;Q04323-2	A0A087WTZ5;E9PJ81;E9PRQ7;Q04323;Q04323-2	UBX domain-containing protein 1	UBXN1	tr|A0A087WTZ5|A0A087WTZ5_HUMAN UBX domain-containing protein 1 OS=Homo sapiens GN=UBXN1 PE=1 SV=1;tr|E9PJ81|E9PJ81_HUMAN UBX domain-containing protein 1 (Fragment) OS=Homo sapiens GN=UBXN1 PE=1 SV=1;tr|E9PRQ7|E9PRQ7_HUMAN UBX domain-containing protein 1 OS	0	0	0	0	0	0	0	1	1	1	6.7	6.7	6.7	27.015	0	19.979	0	1	6.7	0	1	0	5	1	0	1	0	1	0
27	A0A087WU02;Q96RQ1;H0YI50;F8VPA6;H0YI58;F8W0R1;H0YHJ8;F8VR88;F8VUZ2	A0A087WU02;Q96RQ1;H0YI50;F8VPA6	Endoplasmic reticulum-Golgi intermediate compartment protein 2	ERGIC2	tr|A0A087WU02|A0A087WU02_HUMAN Endoplasmic reticulum-Golgi intermediate compartment protein 2 OS=Homo sapiens GN=ERGIC2 PE=4 SV=1;sp|Q96RQ1|ERGI2_HUMAN Endoplasmic reticulum-Golgi intermediate compartment protein 2 OS=Homo sapiens GN=ERGIC2 PE=1 SV=2;tr|H0	168350000	146080000	14973000	8016700	6956000	108830000	158360000	6	6	6	19.9	19.9	19.9	43.432	0	18.627	314430000	19	11.9	16.6	11	8	9	4	5	4	5	4	5
28	E9PE15;A0A087WU31;P51790-4;P51790-5;P51790;P51790-2	E9PE15;A0A087WU31;P51790-4;P51790-5;P51790;P51790-2	Chloride channel protein;H(+)/Cl(-) exchange transporter 3	CLCN3	tr|E9PE15|E9PE15_HUMAN Chloride channel protein (Fragment) OS=Homo sapiens GN=CLCN3 PE=3 SV=1;tr|A0A087WU31|A0A087WU31_HUMAN H(+)/Cl(-) exchange transporter 3 OS=Homo sapiens GN=CLCN3 PE=4 SV=1;sp|P51790-4|CLCN3_HUMAN Isoform 3 of H(+)/Cl(-) exchange trans	51459000	13804000	2105300	1660000	445280	55867000	0	3	3	2	4.7	4.7	2.6	80.501	0.00055679	3.9393	65263000	5	4.3	4.7	3	2	6	2	2	2	2	1	1
29	A0A087WU53;Q9H0U3;Q9H0U3-2	A0A087WU53;Q9H0U3;Q9H0U3-2	Magnesium transporter protein 1	MAGT1	tr|A0A087WU53|A0A087WU53_HUMAN Magnesium transporter protein 1 OS=Homo sapiens GN=MAGT1 PE=1 SV=1;sp|Q9H0U3|MAGT1_HUMAN Magnesium transporter protein 1 OS=Homo sapiens GN=MAGT1 PE=1 SV=1;sp|Q9H0U3-2|MAGT1_HUMAN Isoform 2 of Magnesium transporter protein 1	381100000	366250000	39334000	20058000	19276000	335640000	400660000	6	6	6	16.9	16.9	16.9	41.531	0	44.637	747350000	22	16.9	13.1	12	10	3	6	5	6	5	6	5
30	A0A087WUB9;Q8WYA6;Q8WYA6-4;Q8WYA6-3;Q8WYA6-2;A2A2P1	A0A087WUB9;Q8WYA6;Q8WYA6-4;Q8WYA6-3;Q8WYA6-2	Beta-catenin-like protein 1	CTNNBL1	tr|A0A087WUB9|A0A087WUB9_HUMAN Beta-catenin-like protein 1 OS=Homo sapiens GN=CTNNBL1 PE=1 SV=1;sp|Q8WYA6|CTBL1_HUMAN Beta-catenin-like protein 1 OS=Homo sapiens GN=CTNNBL1 PE=1 SV=1;sp|Q8WYA6-4|CTBL1_HUMAN Isoform 4 of Beta-catenin-like protein 1 OS=Homo	132090000	155430000	10269000	4717500	5551100	149880000	125560000	9	9	9	16.4	16.4	16.4	65.702	0	21.978	287520000	34	8.5	15.1	14	20	6	5	8	5	8	5	8
31	A0A087WUC6;E9PI68;Q15005;E9PL01;E9PRB9;H0YE04	A0A087WUC6;E9PI68;Q15005;E9PL01;E9PRB9	Signal peptidase complex subunit 2	SPCS2	tr|A0A087WUC6|A0A087WUC6_HUMAN Signal peptidase complex subunit 2 OS=Homo sapiens GN=SPCS2 PE=1 SV=1;tr|E9PI68|E9PI68_HUMAN Signal peptidase complex subunit 2 OS=Homo sapiens GN=SPCS2 PE=1 SV=1;sp|Q15005|SPCS2_HUMAN Signal peptidase complex subunit 2 OS=Ho	951530000	920210000	133700000	67967000	65730000	561520000	988020000	11	11	11	50.7	50.7	50.7	25.09	0	106.72	1871700000	96	50.7	45.4	68	28	6	11	8	11	8	11	8
32	A0A087WUD1;Q6DD87	A0A087WUD1;Q6DD87	Zinc finger protein 787	ZNF787	tr|A0A087WUD1|A0A087WUD1_HUMAN Zinc finger protein 787 OS=Homo sapiens GN=ZNF787 PE=1 SV=1;sp|Q6DD87|ZN787_HUMAN Zinc finger protein 787 OS=Homo sapiens GN=ZNF787 PE=1 SV=3	133650000	75321000	9951000	6364300	3586700	120300000	112810000	3	3	3	11.5	11.5	11.5	40.428	0	22.296	208970000	14	11.5	8.1	9	5	2	3	2	3	2	3	2
33	A0A087WUD3;Q9NRP0;Q9NRP0-2	A0A087WUD3;Q9NRP0;Q9NRP0-2	Oligosaccharyltransferase complex subunit OSTC	OSTC	tr|A0A087WUD3|A0A087WUD3_HUMAN Oligosaccharyltransferase complex subunit OSTC OS=Homo sapiens GN=OSTC PE=1 SV=1;sp|Q9NRP0|OSTC_HUMAN Oligosaccharyltransferase complex subunit OSTC OS=Homo sapiens GN=OSTC PE=1 SV=1;sp|Q9NRP0-2|OSTC_HUMAN Isoform 2 of Oligos	1567300000	1703100000	1090100000	522440000	567700000	1978100000	1497400000	3	3	3	31.3	31.3	31.3	9.369	0	97.01	3270400000	36	31.3	31.3	16	20	3	3	3	3	3	3	3
34	A0A087WUK2;O14979	A0A087WUK2;O14979	Heterogeneous nuclear ribonucleoprotein D-like	HNRNPDL	tr|A0A087WUK2|A0A087WUK2_HUMAN Heterogeneous nuclear ribonucleoprotein D-like OS=Homo sapiens GN=HNRNPDL PE=1 SV=1;sp|O14979|HNRDL_HUMAN Heterogeneous nuclear ribonucleoprotein D-like OS=Homo sapiens GN=HNRNPDL PE=1 SV=3	2514400000	2370700000	203540000	104760000	98779000	2060700000	2227100000	15	14	3	39.4	37.2	17.1	40.04	0	179.53	4885100000	158	39.1	31.7	72	86	2	14	14	13	13	3	2
35	A0A087WUL0;Q3LXA3;H0YCY6;Q3LXA3-2;I3L252;E9PJG8;E9PQR1	A0A087WUL0;Q3LXA3;H0YCY6;Q3LXA3-2	Bifunctional ATP-dependent dihydroxyacetone kinase/FAD-AMP lyase (cyclizing);ATP-dependent dihydroxyacetone kinase;FAD-AMP lyase (cyclizing)	TKFC;DAK	tr|A0A087WUL0|A0A087WUL0_HUMAN Bifunctional ATP-dependent dihydroxyacetone kinase/FAD-AMP lyase (cyclizing) OS=Homo sapiens GN=DAK PE=1 SV=1;sp|Q3LXA3|DHAK_HUMAN Bifunctional ATP-dependent dihydroxyacetone kinase/FAD-AMP lyase (cyclizing) OS=Homo sapiens G	1566000000	1274500000	86077000	47456000	38622000	1626900000	1302500000	18	18	18	47.7	47.7	47.7	59.057	0	253.06	2840500000	99	38.5	41.1	50	49	7	15	15	15	15	15	15
36	A0A087WXK2;A0A087WUL4;A0A087WX23;Q86TG7;A0A087WZG9;Q86TG7-2;A0A087WYS2	A0A087WXK2;A0A087WUL4;A0A087WX23;Q86TG7;A0A087WZG9;Q86TG7-2	Retrotransposon-derived protein PEG10	PEG10	tr|A0A087WXK2|A0A087WXK2_HUMAN Retrotransposon-derived protein PEG10 OS=Homo sapiens GN=PEG10 PE=1 SV=1;tr|A0A087WUL4|A0A087WUL4_HUMAN Retrotransposon-derived protein PEG10 OS=Homo sapiens GN=PEG10 PE=1 SV=1;tr|A0A087WX23|A0A087WX23_HUMAN Retrotransposon-d	1107500000	898750000	64716000	35725000	28992000	866010000	1202500000	15	15	15	34.1	34.1	34.1	80.101	0	246.97	2006200000	75	29.6	26.4	41	34	7	14	11	14	11	14	11
37	A0A087WUM0;P57105;A0A087X1F5;A0A087WYV9;A0A087WTA2	A0A087WUM0;P57105;A0A087X1F5;A0A087WYV9	Synaptojanin-2-binding protein	SYNJ2BP-COX16;SYNJ2BP	tr|A0A087WUM0|A0A087WUM0_HUMAN Protein SYNJ2BP-COX16 (Fragment) OS=Homo sapiens GN=SYNJ2BP-COX16 PE=4 SV=1;sp|P57105|SYJ2B_HUMAN Synaptojanin-2-binding protein OS=Homo sapiens GN=SYNJ2BP PE=1 SV=2;tr|A0A087X1F5|A0A087X1F5_HUMAN Protein SYNJ2BP-COX16 (Fragm	204830000	204670000	37227000	18621000	18606000	177510000	198010000	3	3	3	19.9	19.9	19.9	20.774	0	12.717	409500000	15	19.9	19.9	8	7	5	3	3	3	3	3	3
38	A0A087WUQ6;P07203;P07203-2	A0A087WUQ6;P07203;P07203-2	Glutathione peroxidase;Glutathione peroxidase 1	GPX1	tr|A0A087WUQ6|A0A087WUQ6_HUMAN Glutathione peroxidase 1 OS=Homo sapiens GN=GPX1 PE=1 SV=1;sp|P07203|GPX1_HUMAN Glutathione peroxidase 1 OS=Homo sapiens GN=GPX1 PE=1 SV=4;sp|P07203-2|GPX1_HUMAN Isoform 2 of Glutathione peroxidase 1 OS=Homo sapiens GN=GPX1	39145000	9461300	3739000	3011200	727790	38448000	0	2	2	2	12.4	12.4	12.4	21.938	0.000293	4.7943	48606000	2	6.9	5.4	1	1	3	1	1	1	1	1	1
39	E7ETK0;A0A087WUS0;P62847-2;P62847-3;P62847;P62847-4	E7ETK0;A0A087WUS0;P62847-2;P62847-3;P62847;P62847-4	40S ribosomal protein S24	RPS24	tr|E7ETK0|E7ETK0_HUMAN 40S ribosomal protein S24 OS=Homo sapiens GN=RPS24 PE=1 SV=1;tr|A0A087WUS0|A0A087WUS0_HUMAN 40S ribosomal protein S24 OS=Homo sapiens GN=RPS24 PE=1 SV=1;sp|P62847-2|RS24_HUMAN Isoform 2 of 40S ribosomal protein S24 OS=Homo sapiens GN	991280000	748340000	248520000	141610000	106910000	914170000	596570000	5	5	5	35.9	35.9	35.9	15.197	0	39.364	1739600000	47	35.9	35.9	18	29	6	5	5	5	5	5	5
40	A0A087WUT0;Q9P2K5-2;Q9P2K5;H0YKS1;H0YN19;Q9P2K5-3	A0A087WUT0;Q9P2K5-2;Q9P2K5;H0YKS1;H0YN19;Q9P2K5-3	Myelin expression factor 2	MYEF2	tr|A0A087WUT0|A0A087WUT0_HUMAN Myelin expression factor 2 OS=Homo sapiens GN=MYEF2 PE=1 SV=1;sp|Q9P2K5-2|MYEF2_HUMAN Isoform 2 of Myelin expression factor 2 OS=Homo sapiens GN=MYEF2;sp|Q9P2K5|MYEF2_HUMAN Myelin expression factor 2 OS=Homo sapiens GN=MYEF2	16095000	0	519190	519190	0	19572000	0	2	2	2	9.5	9.5	9.5	58.685	0.00079702	3.291	16095000	4	9.5	0	4	0	6	2	0	2	0	2	0
41	A0A087WUT6;O60841	A0A087WUT6;O60841	Eukaryotic translation initiation factor 5B	EIF5B	tr|A0A087WUT6|A0A087WUT6_HUMAN Eukaryotic translation initiation factor 5B OS=Homo sapiens GN=EIF5B PE=1 SV=1;sp|O60841|IF2P_HUMAN Eukaryotic translation initiation factor 5B OS=Homo sapiens GN=EIF5B PE=1 SV=4	417450000	263570000	11164000	6843500	4320800	443480000	316570000	10	10	10	13.2	13.2	13.2	138.68	0	78.402	681020000	26	10.8	8.8	15	11	2	7	8	7	8	7	8
42	A0A087WZB2;A0A087WUV9;Q6NUM6-2;Q6NUM6;Q9NV66;A0A087WWV6	A0A087WZB2;A0A087WUV9;Q6NUM6-2;Q6NUM6;Q9NV66;A0A087WWV6	S-adenosyl-L-methionine-dependent tRNA 4-demethylwyosine synthase	TYW1B;TYW1	tr|A0A087WZB2|A0A087WZB2_HUMAN S-adenosyl-L-methionine-dependent tRNA 4-demethylwyosine synthase OS=Homo sapiens GN=TYW1B PE=4 SV=1;tr|A0A087WUV9|A0A087WUV9_HUMAN S-adenosyl-L-methionine-dependent tRNA 4-demethylwyosine synthase OS=Homo sapiens GN=TYW1 PE=	55010000	0	1528100	1528100	0	54397000	0	3	3	3	7.3	7.3	7.3	76.946	0	28.256	55010000	4	7.3	0	4	0	6	3	0	3	0	3	0
43	A0A087WV34;Q8WWB7-2;Q8WWB7;X6R6A3;A0A087X0W3	A0A087WV34;Q8WWB7-2;Q8WWB7;X6R6A3;A0A087X0W3	Glycosylated lysosomal membrane protein	GLMP	tr|A0A087WV34|A0A087WV34_HUMAN Lysosomal protein NCU-G1 OS=Homo sapiens GN=C1orf85 PE=4 SV=1;sp|Q8WWB7-2|NCUG1_HUMAN Isoform 2 of Lysosomal protein NCU-G1 OS=Homo sapiens GN=C1orf85;sp|Q8WWB7|NCUG1_HUMAN Lysosomal protein NCU-G1 OS=Homo sapiens GN=C1orf85	173740000	117510000	36407000	21718000	14689000	145020000	131670000	2	2	2	14.4	14.4	14.4	34.576	0	10.208	291250000	5	14.4	14.4	2	3	5	2	2	2	2	2	2
44	A0A087WV66;P46013-2;P46013	A0A087WV66;P46013-2;P46013	Antigen KI-67	MKI67	tr|A0A087WV66|A0A087WV66_HUMAN Antigen KI-67 OS=Homo sapiens GN=MKI67 PE=1 SV=1;sp|P46013-2|KI67_HUMAN Isoform Short of Antigen KI-67 OS=Homo sapiens GN=MKI67;sp|P46013|KI67_HUMAN Antigen KI-67 OS=Homo sapiens GN=MKI67 PE=1 SV=2	269570000	223120000	2324000	1271500	1052400	218920000	238630000	19	19	19	10.6	10.6	10.6	358.62	0	89.709	492680000	31	9	5.3	20	11	3	16	10	16	10	16	10
45	A0A087WV73;P46087;P46087-4;P46087-2;P46087-3;F5GYR3;F5GWB7;F5H709;F5H5X6;F5H359;F5H8G6	A0A087WV73;P46087;P46087-4;P46087-2;P46087-3	Probable 28S rRNA (cytosine(4447)-C(5))-methyltransferase	NOP2	tr|A0A087WV73|A0A087WV73_HUMAN Probable 28S rRNA (cytosine(4447)-C(5))-methyltransferase OS=Homo sapiens GN=NOP2 PE=1 SV=1;sp|P46087|NOP2_HUMAN Probable 28S rRNA (cytosine(4447)-C(5))-methyltransferase OS=Homo sapiens GN=NOP2 PE=1 SV=2;sp|P46087-4|NOP2_HUM	2381900000	1983600000	101520000	55393000	46130000	2469100000	2147800000	21	21	21	29.5	29.5	29.5	94.095	0	213.02	4365500000	111	27.4	26	56	55	11	18	18	18	18	18	18
46	J3QS48;I3L295;J3KT75;J3QW43;J3QRD5;Q9H3L2;Q1HDL3;A0A087WV81;O75352-2;O75352;J3KTK8;J3QQZ4;I3L1D2;J3KSI4;I3L405;I3L261;I3L4E0	J3QS48;I3L295;J3KT75;J3QW43;J3QRD5;Q9H3L2;Q1HDL3;A0A087WV81;O75352-2;O75352;J3KTK8;J3QQZ4;I3L1D2	Mannose-P-dolichol utilization defect 1 protein	MPDU1;HBEBP2BPA	tr|J3QS48|J3QS48_HUMAN Mannose-P-dolichol utilization defect 1 protein OS=Homo sapiens GN=MPDU1 PE=1 SV=1;tr|I3L295|I3L295_HUMAN Mannose-P-dolichol utilization defect 1 protein OS=Homo sapiens GN=MPDU1 PE=1 SV=1;tr|J3KT75|J3KT75_HUMAN Mannose-P-dolichol ut	979470000	909330000	377760000	195890000	181870000	1152000000	786200000	5	5	5	57.4	57.4	57.4	10.978	0	18.038	1888800000	57	57.4	39.6	26	31	17	5	4	5	4	5	4
47	A0A087WVB0;Q9BQ39;A0A087WVC1	A0A087WVB0;Q9BQ39;A0A087WVC1	ATP-dependent RNA helicase DDX50	DDX50	tr|A0A087WVB0|A0A087WVB0_HUMAN ATP-dependent RNA helicase DDX50 OS=Homo sapiens GN=DDX50 PE=1 SV=1;sp|Q9BQ39|DDX50_HUMAN ATP-dependent RNA helicase DDX50 OS=Homo sapiens GN=DDX50 PE=1 SV=1;tr|A0A087WVC1|A0A087WVC1_HUMAN ATP-dependent RNA helicase DDX50 OS=	705140000	456310000	27653000	16789000	10864000	547490000	489760000	18	16	16	31	27.3	27.3	82.713	0	119.66	1161400000	40	29.8	23.1	23	17	3	17	13	15	11	15	11
48	A0A087WVF7;Q9NZM3-2;Q9NZM3;H0Y3G5;E7EPJ2;Q9NZM3-4;Q9NZM3-3;Q15811-4;Q15811-9;Q15811-8;Q15811	A0A087WVF7;Q9NZM3-2;Q9NZM3;H0Y3G5;E7EPJ2;Q9NZM3-4;Q9NZM3-3;Q15811-4;Q15811-9;Q15811-8;Q15811	Intersectin-2;Intersectin-1	ITSN2;ITSN1	tr|A0A087WVF7|A0A087WVF7_HUMAN Intersectin-2 OS=Homo sapiens GN=ITSN2 PE=1 SV=1;sp|Q9NZM3-2|ITSN2_HUMAN Isoform 2 of Intersectin-2 OS=Homo sapiens GN=ITSN2;sp|Q9NZM3|ITSN2_HUMAN Intersectin-2 OS=Homo sapiens GN=ITSN2 PE=1 SV=3;tr|H0Y3G5|H0Y3G5_HUMAN Inters	16051000	4070400	211810	168960	42846	11659000	9065000	2	2	2	1.8	1.8	1.8	191.6	0.0041514	2.3592	20122000	2	1.8	1.1	1	1	11	2	1	2	1	2	1
49	A0A087WVI0;E9PBL8;Q8WTW3	A0A087WVI0;E9PBL8;Q8WTW3	Conserved oligomeric Golgi complex subunit 1	COG1	tr|A0A087WVI0|A0A087WVI0_HUMAN Conserved oligomeric Golgi complex subunit 1 OS=Homo sapiens GN=COG1 PE=4 SV=1;tr|E9PBL8|E9PBL8_HUMAN Conserved oligomeric Golgi complex subunit 1 (Fragment) OS=Homo sapiens GN=COG1 PE=4 SV=2;sp|Q8WTW3|COG1_HUMAN Conserved ol	18891000	5255300	416320	325710	90609	22662000	0	4	4	4	4.8	4.8	4.8	104.79	0.00030257	5.4985	24147000	3	3.3	1.5	3	0	3	3	1	3	1	3	1
50	A0A087WVM3;O00622	A0A087WVM3;O00622	Protein CYR61	CYR61	tr|A0A087WVM3|A0A087WVM3_HUMAN Protein CYR61 OS=Homo sapiens GN=CYR61 PE=4 SV=1;sp|O00622|CYR61_HUMAN Protein CYR61 OS=Homo sapiens GN=CYR61 PE=1 SV=1	11082000	16452000	949440	382140	567300	0	23894000	2	2	2	7.7	7.7	7.7	41.839	0.00078472	3.1463	27534000	2	7.7	4.2	1	1	2	2	1	2	1	2	1
51	A0A087WVM4;B7ZM99;Q6UB35;H0Y327;Q6UB35-2;Q5JYA8;Q5JYA3;Q4VXM0;Q4VXM1;Q4VXV2	A0A087WVM4;B7ZM99;Q6UB35	Monofunctional C1-tetrahydrofolate synthase, mitochondrial	MTHFD1L	tr|A0A087WVM4|A0A087WVM4_HUMAN Monofunctional C1-tetrahydrofolate synthase, mitochondrial OS=Homo sapiens GN=MTHFD1L PE=1 SV=1;tr|B7ZM99|B7ZM99_HUMAN MTHFD1L protein OS=Homo sapiens GN=MTHFD1L PE=1 SV=1;sp|Q6UB35|C1TM_HUMAN Monofunctional C1-tetrahydrofola	1947100000	1883500000	76612000	38942000	37670000	2061900000	1863500000	29	29	29	44.2	44.2	44.2	99.31	0	142.64	3830600000	112	41.2	33	54	58	10	27	22	27	22	27	22
52	A0A087WVP1;Q14517;H0Y9H4;D6RCE4;H0Y8F5;H0Y9C8	A0A087WVP1;Q14517	Protocadherin Fat 1;Protocadherin Fat 1, nuclear form	FAT1	tr|A0A087WVP1|A0A087WVP1_HUMAN Protocadherin Fat 1 OS=Homo sapiens GN=FAT1 PE=1 SV=1;sp|Q14517|FAT1_HUMAN Protocadherin Fat 1 OS=Homo sapiens GN=FAT1 PE=1 SV=2	146190000	90113000	1109400	686360	423060	131360000	108370000	12	12	12	4.4	4.4	4.4	506.37	0	27.768	236310000	23	3.5	3	13	10	6	9	8	9	8	9	8
53	A0A087WVQ6;Q00610-2;Q00610;J3KS13;K7EJJ5;J3KSQ2;J3QL20;J3KRF5;F5H5N6;A0A087WV74;A0A087WXH4	A0A087WVQ6;Q00610-2;Q00610	Clathrin heavy chain;Clathrin heavy chain 1	CLTC	tr|A0A087WVQ6|A0A087WVQ6_HUMAN Clathrin heavy chain 1 OS=Homo sapiens GN=CLTC PE=1 SV=1;sp|Q00610-2|CLH1_HUMAN Isoform 2 of Clathrin heavy chain 1 OS=Homo sapiens GN=CLTC;sp|Q00610|CLH1_HUMAN Clathrin heavy chain 1 OS=Homo sapiens GN=CLTC PE=1 SV=5	23700000000	21153000000	457680000	241830000	215840000	20411000000	20213000000	89	89	69	64.7	64.7	54.1	192.06	0	323.31	44853000000	1240	62.4	60.6	618	622	11	83	79	83	79	64	62
54	A0A087WVV7;A0A087X165;Q9C0H9-2;Q9C0H9;Q9C0H9-5	A0A087WVV7;A0A087X165;Q9C0H9-2;Q9C0H9;Q9C0H9-5	SRC kinase signaling inhibitor 1	SRCIN1	tr|A0A087WVV7|A0A087WVV7_HUMAN SRC kinase-signaling inhibitor 1 (Fragment) OS=Homo sapiens GN=SRCIN1 PE=4 SV=1;tr|A0A087X165|A0A087X165_HUMAN SRC kinase-signaling inhibitor 1 OS=Homo sapiens GN=SRCIN1 PE=4 SV=1;sp|Q9C0H9-2|SRCN1_HUMAN Isoform 2 of SRC kina	0	14272000	216250	0	216250	0	17798000	2	2	2	4.3	4.3	4.3	99.161	0.00077983	3.0546	14272000	3	0	4.3	0	3	5	0	2	0	2	0	2
55	Q5TI65;A0A087WVZ0;Q9Y5U8	Q5TI65;A0A087WVZ0;Q9Y5U8	Mitochondrial pyruvate carrier 1	BRP44L;MPC1	tr|Q5TI65|Q5TI65_HUMAN Brain protein 44-like, isoform CRA_a OS=Homo sapiens GN=BRP44L PE=1 SV=1;tr|A0A087WVZ0|A0A087WVZ0_HUMAN Mitochondrial pyruvate carrier 1 OS=Homo sapiens GN=MPC1 PE=1 SV=1;sp|Q9Y5U8|MPC1_HUMAN Mitochondrial pyruvate carrier 1 OS=Homo	9389300	0	3129800	3129800	0	10509000	0	1	1	1	31.8	31.8	31.8	7.5399	0.00056085	4.0622	9389300	2	31.8	0	2	0	3	1	0	1	0	1	0
56	A0A087WVZ9;P19388;A0A087WWX0;A0A087WVN5	A0A087WVZ9;P19388;A0A087WWX0	DNA-directed RNA polymerases I, II, and III subunit RPABC1	POLR2E	tr|A0A087WVZ9|A0A087WVZ9_HUMAN DNA-directed RNA polymerases I, II, and III subunit RPABC1 OS=Homo sapiens GN=POLR2E PE=1 SV=1;sp|P19388|RPAB1_HUMAN DNA-directed RNA polymerases I, II, and III subunit RPABC1 OS=Homo sapiens GN=POLR2E PE=1 SV=4;tr|A0A087WWX0	161600000	163110000	27059000	13466000	13593000	161780000	161170000	5	5	5	32.1	32.1	32.1	21.459	0	16.025	324710000	17	32.1	22.3	9	8	4	5	3	5	3	5	3
57	A0A087WW36;A0A087WYU6;X5D289;Q9NPH0-2;Q9NPH0	A0A087WW36;A0A087WYU6;X5D289;Q9NPH0-2;Q9NPH0	Lysophosphatidic acid phosphatase type 6	ACP6	tr|A0A087WW36|A0A087WW36_HUMAN Lysophosphatidic acid phosphatase type 6 (Fragment) OS=Homo sapiens GN=ACP6 PE=4 SV=1;tr|A0A087WYU6|A0A087WYU6_HUMAN Lysophosphatidic acid phosphatase type 6 (Fragment) OS=Homo sapiens GN=ACP6 PE=4 SV=1;tr|X5D289|X5D289_HUMAN	14135000	10788000	2769100	1570500	1198600	14180000	12370000	1	1	1	14.7	14.7	14.7	16.314	0.00079787	3.3108	24922000	6	14.7	14.7	4	2	5	1	1	1	1	1	1
58	A0A087WW39;P55198;A0A087WVY1	A0A087WW39;P55198;A0A087WVY1	Protein AF-17	MLLT6	tr|A0A087WW39|A0A087WW39_HUMAN Protein AF-17 OS=Homo sapiens GN=MLLT6 PE=1 SV=1;sp|P55198|AF17_HUMAN Protein AF-17 OS=Homo sapiens GN=MLLT6 PE=1 SV=2;tr|A0A087WVY1|A0A087WVY1_HUMAN Protein AF-17 (Fragment) OS=Homo sapiens GN=MLLT6 PE=4 SV=1	19074000	4521200	786510	635810	150710	12744000	10422000	2	2	2	3.1	3.1	3.1	112.05	0.00031427	6.4104	23595000	3	3.1	2.1	2	1	3	2	1	2	1	2	1
59	A0A087WW40;Q9Y371;Q9Y371-2;Q9Y371-3	A0A087WW40;Q9Y371;Q9Y371-2;Q9Y371-3	Endophilin-B1	SH3GLB1	tr|A0A087WW40|A0A087WW40_HUMAN Endophilin-B1 OS=Homo sapiens GN=SH3GLB1 PE=1 SV=1;sp|Q9Y371|SHLB1_HUMAN Endophilin-B1 OS=Homo sapiens GN=SH3GLB1 PE=1 SV=1;sp|Q9Y371-2|SHLB1_HUMAN Isoform 2 of Endophilin-B1 OS=Homo sapiens GN=SH3GLB1;sp|Q9Y371-3|SHLB1_HUMAN	64432000	9172000	3345600	2928700	416910	37775000	20215000	2	2	2	6.6	6.6	6.6	44.26	0.00032637	7.4538	73604000	4	6.6	3.8	3	1	4	2	1	2	1	2	1
60	C9JAG1;A0A087WW58;Q9C0D9	C9JAG1;A0A087WW58;Q9C0D9	Ethanolaminephosphotransferase 1	EPT1	tr|C9JAG1|C9JAG1_HUMAN Ethanolaminephosphotransferase 1 (Fragment) OS=Homo sapiens GN=EPT1 PE=1 SV=1;tr|A0A087WW58|A0A087WW58_HUMAN Ethanolaminephosphotransferase 1 OS=Homo sapiens GN=EPT1 PE=1 SV=1;sp|Q9C0D9|EPT1_HUMAN Ethanolaminephosphotransferase 1 OS=	194290000	163450000	119250000	64762000	54485000	143030000	146980000	3	3	3	22.8	22.8	22.8	20.557	0	38.629	357740000	25	22.8	22.8	10	15	3	3	3	3	3	3	3
61	A0A087WW66;Q99460;Q99460-2;H7C378;H7BZR6	A0A087WW66;Q99460;Q99460-2	26S proteasome non-ATPase regulatory subunit 1	PSMD1	tr|A0A087WW66|A0A087WW66_HUMAN 26S proteasome non-ATPase regulatory subunit 1 OS=Homo sapiens GN=PSMD1 PE=1 SV=1;sp|Q99460|PSMD1_HUMAN 26S proteasome non-ATPase regulatory subunit 1 OS=Homo sapiens GN=PSMD1 PE=1 SV=2;sp|Q99460-2|PSMD1_HUMAN Isoform 2 of 26	343360000	386090000	14303000	6732500	7570300	356100000	444520000	15	15	15	26.2	26.2	26.2	105.85	0	92.114	729440000	36	17	19.7	17	19	5	10	12	10	12	10	12
62	A0A087WW77;Q15334	A0A087WW77;Q15334	Lethal(2) giant larvae protein homolog 1	LLGL1	tr|A0A087WW77|A0A087WW77_HUMAN Lethal(2) giant larvae protein homolog 1 OS=Homo sapiens GN=LLGL1 PE=1 SV=1;sp|Q15334|L2GL1_HUMAN Lethal(2) giant larvae protein homolog 1 OS=Homo sapiens GN=LLGL1 PE=1 SV=3	0	0	0	0	0	0	0	1	1	1	1.4	1.4	1.4	114.43	0.005323	2.2581	0	1	0	1.4	0	1	2	0	1	0	1	0	1
63	A0A087WWK8;Q6DN90-2;Q6DN90	A0A087WWK8;Q6DN90-2;Q6DN90	IQ motif and SEC7 domain-containing protein 1	IQSEC1	tr|A0A087WWK8|A0A087WWK8_HUMAN IQ motif and SEC7 domain-containing protein 1 OS=Homo sapiens GN=IQSEC1 PE=1 SV=1;sp|Q6DN90-2|IQEC1_HUMAN Isoform 2 of IQ motif and SEC7 domain-containing protein 1 OS=Homo sapiens GN=IQSEC1;sp|Q6DN90|IQEC1_HUMAN IQ motif and	56373000	25193000	1337200	924150	413010	22402000	0	2	2	2	2.7	2.7	2.7	124.48	0.00029155	4.7175	81567000	2	1.5	1.2	1	1	3	1	1	1	1	1	1
64	H0YMB3;H0YLV5;A0A087WWM4;F8WAN9;H0YNJ6;Q9P2T1;Q9P2T1-2;Q9P2T1-3;H0YL68;H0YN22;H0YK13;H0YMW6;H0YNS9;H0YMR9;H0YK71;H0YMV5;H0YLB8;H0YNH0	H0YMB3;H0YLV5;A0A087WWM4;F8WAN9;H0YNJ6;Q9P2T1;Q9P2T1-2;Q9P2T1-3	GMP reductase;GMP reductase 2	GMPR2	tr|H0YMB3|H0YMB3_HUMAN GMP reductase 2 OS=Homo sapiens GN=GMPR2 PE=1 SV=1;tr|H0YLV5|H0YLV5_HUMAN GMP reductase 2 OS=Homo sapiens GN=GMPR2 PE=1 SV=1;tr|A0A087WWM4|A0A087WWM4_HUMAN GMP reductase 2 OS=Homo sapiens GN=GMPR2 PE=1 SV=1;tr|F8WAN9|F8WAN9_HUMAN GMP	61988000	0	4132600	4132600	0	36747000	0	3	3	3	12.1	12.1	12.1	33.921	0.00057274	4.3662	61988000	5	12.1	2.9	4	1	18	3	1	3	1	3	1
65	A0A087WWP4;Q96T37-4;Q96T37-2;Q96T37-3;Q96T37	A0A087WWP4;Q96T37-4;Q96T37-2;Q96T37-3;Q96T37	Putative RNA-binding protein 15	RBM15	tr|A0A087WWP4|A0A087WWP4_HUMAN Putative RNA-binding protein 15 OS=Homo sapiens GN=RBM15 PE=1 SV=1;sp|Q96T37-4|RBM15_HUMAN Isoform 4 of Putative RNA-binding protein 15 OS=Homo sapiens GN=RBM15;sp|Q96T37-2|RBM15_HUMAN Isoform 2 of Putative RNA-binding protei	438330000	196310000	10404000	7185700	3218300	324150000	329290000	11	11	11	15.9	15.9	15.9	102.13	0	93.885	634640000	23	14.8	10.9	13	10	5	10	6	10	6	10	6
66	A0A087WWP7;A0A087X1P0;P23470-2;P23470	A0A087WWP7;A0A087X1P0;P23470-2;P23470	Protein-tyrosine-phosphatase;Receptor-type tyrosine-protein phosphatase gamma	PTPRG	tr|A0A087WWP7|A0A087WWP7_HUMAN Receptor-type tyrosine-protein phosphatase gamma OS=Homo sapiens GN=PTPRG PE=1 SV=1;tr|A0A087X1P0|A0A087X1P0_HUMAN Receptor-type tyrosine-protein phosphatase gamma OS=Homo sapiens GN=PTPRG PE=1 SV=1;sp|P23470-2|PTPRG_HUMAN Is	17915000	7323200	371150	263460	107690	17596000	0	3	3	3	3.2	3.2	3.2	151.54	0.00031143	6.1227	25238000	3	2.1	1.1	2	1	4	2	1	2	1	2	1
67	A0A087WWS1;Q96FV9;Q96FV9-2;R4GMN4;A0A087WY84;J3KT14;J3KRD7;R4GN58;J3QQZ3	A0A087WWS1;Q96FV9;Q96FV9-2	THO complex subunit 1	THOC1	tr|A0A087WWS1|A0A087WWS1_HUMAN THO complex subunit 1 OS=Homo sapiens GN=THOC1 PE=1 SV=1;sp|Q96FV9|THOC1_HUMAN THO complex subunit 1 OS=Homo sapiens GN=THOC1 PE=1 SV=1;sp|Q96FV9-2|THOC1_HUMAN Isoform 2 of THO complex subunit 1 OS=Homo sapiens GN=THOC1	624140000	441310000	26636000	15604000	11033000	525240000	623860000	14	14	14	26.9	26.9	26.9	75.651	0	86.077	1065500000	42	22.5	17.8	23	19	9	12	8	12	8	12	8
68	A0A087WWS7;Q15833-2;Q15833;Q15833-3;M0R0M7;M0QZ54;M0R118;M0R1A1;M0R376;M0R0D4;A0A087WUN8	A0A087WWS7;Q15833-2;Q15833;Q15833-3;M0R0M7	Syntaxin-binding protein 2	STXBP2	tr|A0A087WWS7|A0A087WWS7_HUMAN Syntaxin-binding protein 2 OS=Homo sapiens GN=STXBP2 PE=4 SV=1;sp|Q15833-2|STXB2_HUMAN Isoform 2 of Syntaxin-binding protein 2 OS=Homo sapiens GN=STXBP2;sp|Q15833|STXB2_HUMAN Syntaxin-binding protein 2 OS=Homo sapiens GN=STXB	192640000	81552000	6687600	4698600	1989100	123900000	157980000	8	8	8	22.5	22.5	22.5	64.705	0	47.276	274190000	20	19.9	13.1	13	7	11	7	5	7	5	7	5
69	F2Z329;A0A087WWU1;Q96Q45-2;Q96Q45;Q96Q45-5;Q96Q45-3	F2Z329;A0A087WWU1;Q96Q45-2;Q96Q45;Q96Q45-5;Q96Q45-3	Transmembrane protein 237	TMEM237	tr|F2Z329|F2Z329_HUMAN Transmembrane protein 237 OS=Homo sapiens GN=TMEM237 PE=4 SV=1;tr|A0A087WWU1|A0A087WWU1_HUMAN Transmembrane protein 237 OS=Homo sapiens GN=TMEM237 PE=4 SV=1;sp|Q96Q45-2|TM237_HUMAN Isoform 2 of Transmembrane protein 237 OS=Homo sapie	0	27368000	3909700	0	3909700	0	29737000	1	1	1	17.7	17.7	17.7	10.589	0.0078403	2.0364	27368000	2	17.7	17.7	1	1	6	1	1	1	1	1	1
70	A0A087WX20;H0Y818;P40692-2;P40692-3;P40692	A0A087WX20;H0Y818;P40692-2;P40692-3;P40692	DNA mismatch repair protein Mlh1	MLH1	tr|A0A087WX20|A0A087WX20_HUMAN DNA mismatch repair protein Mlh1 (Fragment) OS=Homo sapiens GN=MLH1 PE=1 SV=1;tr|H0Y818|H0Y818_HUMAN DNA mismatch repair protein Mlh1 (Fragment) OS=Homo sapiens GN=MLH1 PE=1 SV=1;sp|P40692-2|MLH1_HUMAN Isoform 2 of DNA mismat	2394700	0	171050	171050	0	2352100	0	1	1	1	5.4	5.4	5.4	25.179	0.0005698	4.2917	2394700	1	5.4	0	1	0	5	1	0	1	0	1	0
71	A0A087WX92;O15403	A0A087WX92;O15403	Monocarboxylate transporter 7	SLC16A6	tr|A0A087WX92|A0A087WX92_HUMAN Monocarboxylate transporter 7 OS=Homo sapiens GN=SLC16A6 PE=1 SV=1;sp|O15403|MOT7_HUMAN Monocarboxylate transporter 7 OS=Homo sapiens GN=SLC16A6 PE=1 SV=2	189400000	61549000	13942000	10522000	3419400	108520000	97252000	5	5	5	9.4	9.4	9.4	57.494	0	8.4078	250950000	14	9.4	6.1	11	3	2	5	3	5	3	5	3
72	C9IZL6;A0A087WXB8;Q9Y274-2;Q9Y274;C9JWJ3;C9J480	C9IZL6;A0A087WXB8;Q9Y274-2;Q9Y274;C9JWJ3;C9J480	Type 2 lactosamine alpha-2,3-sialyltransferase	ST3GAL6	tr|C9IZL6|C9IZL6_HUMAN Type 2 lactosamine alpha-2,3-sialyltransferase (Fragment) OS=Homo sapiens GN=ST3GAL6 PE=4 SV=1;tr|A0A087WXB8|A0A087WXB8_HUMAN ST3 beta-galactoside alpha-2,3-sialyltransferase 6, isoform CRA_b OS=Homo sapiens GN=ST3GAL6 PE=4 SV=1;sp|Q	36705000	21235000	4138600	2621800	1516800	35915000	27195000	2	2	2	8.7	8.7	8.7	25.538	0.001262	2.7506	57940000	7	8.7	8.7	4	3	6	2	2	2	2	2	2
73	A0A087WXC5;E7ESZ7;O95299;O95299-2;H7C2W5;H7C1Y7;H7C2X4;C9J6X0;Q8N1B9	A0A087WXC5;E7ESZ7;O95299;O95299-2	NADH dehydrogenase [ubiquinone] 1 alpha subcomplex subunit 10, mitochondrial	NDUFA10	tr|A0A087WXC5|A0A087WXC5_HUMAN NADH dehydrogenase [ubiquinone] 1 alpha subcomplex subunit 10, mitochondrial OS=Homo sapiens GN=NDUFA10 PE=1 SV=1;tr|E7ESZ7|E7ESZ7_HUMAN NADH dehydrogenase [ubiquinone] 1 alpha subcomplex subunit 10, mitochondrial OS=Homo sap	1515300000	1588600000	124160000	60613000	63543000	1616300000	1590500000	16	16	16	45.6	45.6	45.6	40.836	0	248.41	3103900000	102	41.4	42.5	40	62	9	12	14	12	14	12	14
74	A0A087WXD9;Q3V6T2-5;Q3V6T2-4;Q3V6T2-2;Q3V6T2-3;Q3V6T2	A0A087WXD9;Q3V6T2-5;Q3V6T2-4;Q3V6T2-2;Q3V6T2-3;Q3V6T2	Girdin	CCDC88A	tr|A0A087WXD9|A0A087WXD9_HUMAN Girdin OS=Homo sapiens GN=CCDC88A PE=1 SV=1;sp|Q3V6T2-5|GRDN_HUMAN Isoform 5 of Girdin OS=Homo sapiens GN=CCDC88A;sp|Q3V6T2-4|GRDN_HUMAN Isoform 4 of Girdin OS=Homo sapiens GN=CCDC88A;sp|Q3V6T2-2|GRDN_HUMAN Isoform 2 of Girdi	145820000	0	2859200	2859200	0	143220000	0	2	2	2	3.9	3.9	3.9	87.269	0.0098522	1.9292	145820000	2	3.9	0	2	0	6	2	0	2	0	2	0
75	A0A087X1U4;A0A087WXF0;P51608;P51608-2;A0A087WVW7;B5MCB4	A0A087X1U4;A0A087WXF0;P51608;P51608-2;A0A087WVW7;B5MCB4	Methyl-CpG-binding protein 2	MECP2	tr|A0A087X1U4|A0A087X1U4_HUMAN Methyl-CpG-binding protein 2 OS=Homo sapiens GN=MECP2 PE=1 SV=1;tr|A0A087WXF0|A0A087WXF0_HUMAN Methyl-CpG-binding protein 2 OS=Homo sapiens GN=MECP2 PE=1 SV=1;sp|P51608|MECP2_HUMAN Methyl-CpG-binding protein 2 OS=Homo sapiens	24802000	0	1458900	1458900	0	22158000	0	2	2	2	7.7	7.7	7.7	34.897	0.0012553	2.7162	24802000	1	7.7	0	1	0	6	2	0	2	0	2	0
76	H0YJ97;A0A087WXK9;Q15643;H0YJI2	H0YJ97;A0A087WXK9;Q15643	Thyroid receptor-interacting protein 11	TRIP11	tr|H0YJ97|H0YJ97_HUMAN Thyroid receptor-interacting protein 11 (Fragment) OS=Homo sapiens GN=TRIP11 PE=1 SV=1;tr|A0A087WXK9|A0A087WXK9_HUMAN Thyroid receptor-interacting protein 11 OS=Homo sapiens GN=TRIP11 PE=1 SV=1;sp|Q15643|TRIPB_HUMAN Thyroid receptor-	134240000	0	1100300	1100300	0	146650000	0	6	6	6	6.5	6.5	6.5	195.7	0	8.9181	134240000	3	6.5	0	3	0	4	6	0	6	0	6	0
77	A0A087WXM6;J3QQT2;J3KRX5;P18621;P18621-3;J3QLC8;P18621-2;J3KRB3;A0A087WWH0;J3QS96;A0A087WY81;J3KSJ0	A0A087WXM6;J3QQT2;J3KRX5;P18621;P18621-3;J3QLC8;P18621-2;J3KRB3;A0A087WWH0;J3QS96;A0A087WY81	60S ribosomal protein L17	RPL17	tr|A0A087WXM6|A0A087WXM6_HUMAN 60S ribosomal protein L17 (Fragment) OS=Homo sapiens GN=RPL17 PE=1 SV=1;tr|J3QQT2|J3QQT2_HUMAN 60S ribosomal protein L17 (Fragment) OS=Homo sapiens GN=RPL17 PE=1 SV=1;tr|J3KRX5|J3KRX5_HUMAN 60S ribosomal protein L17 (Fragment	4453500000	3896500000	695840000	371130000	324710000	3796000000	4059100000	9	9	9	49.7	49.7	49.7	19.586	0	217.55	8350000000	140	49.7	45	67	73	12	9	8	9	8	9	8
78	A0A087WXP3;E9PEE8;P18564-2;P18564	A0A087WXP3;E9PEE8;P18564-2;P18564	Integrin beta;Integrin beta-6	ITGB6	tr|A0A087WXP3|A0A087WXP3_HUMAN Integrin beta-6 OS=Homo sapiens GN=ITGB6 PE=4 SV=1;tr|E9PEE8|E9PEE8_HUMAN Integrin beta OS=Homo sapiens GN=ITGB6 PE=3 SV=1;sp|P18564-2|ITB6_HUMAN Isoform 2 of Integrin beta-6 OS=Homo sapiens GN=ITGB6;sp|P18564|ITB6_HUMAN Inte	296050000	207260000	13603000	8001500	5601600	272620000	216700000	1	1	1	1.3	1.3	1.3	75.849	0.00078268	3.129	503310000	15	1.3	1.3	7	8	4	1	1	1	1	1	1
79	A0A087WXS7;O43681;K7ERW9	A0A087WXS7;O43681	ATPase ASNA1	ASNA1	tr|A0A087WXS7|A0A087WXS7_HUMAN ATPase ASNA1 OS=Homo sapiens GN=ASNA1 PE=1 SV=1;sp|O43681|ASNA_HUMAN ATPase ASNA1 OS=Homo sapiens GN=ASNA1 PE=1 SV=2	371480000	323360000	43428000	23218000	20210000	311560000	375380000	8	8	8	27.5	27.5	27.5	37.119	0	21.666	694840000	33	24.2	27.5	15	18	3	6	8	6	8	6	8
80	A0A087WXU0;Q9NWS8-2;Q9NWS8;Q5SZ82	A0A087WXU0;Q9NWS8-2;Q9NWS8;Q5SZ82	Required for meiotic nuclear division protein 1 homolog	RMND1	tr|A0A087WXU0|A0A087WXU0_HUMAN Required for meiotic nuclear division protein 1 homolog OS=Homo sapiens GN=RMND1 PE=1 SV=1;sp|Q9NWS8-2|RMND1_HUMAN Isoform 2 of Required for meiotic nuclear division protein 1 homolog OS=Homo sapiens GN=RMND1;sp|Q9NWS8|RMND1_	403530000	319120000	42509000	23737000	18772000	493380000	299340000	11	11	11	43.7	43.7	43.7	32.26	0	37.155	722660000	36	35.1	33	16	20	4	8	8	8	8	8	8
81	A0A087WXV4;P41235-7;P41235-3;P41235-6;P41235-5;P41235-2;P41235;P41235-4;Q14541;Q14541-2	A0A087WXV4;P41235-7;P41235-3;P41235-6;P41235-5;P41235-2;P41235;P41235-4	Hepatocyte nuclear factor 4-alpha	HNF4A	tr|A0A087WXV4|A0A087WXV4_HUMAN Hepatocyte nuclear factor 4-alpha OS=Homo sapiens GN=HNF4A PE=4 SV=1;sp|P41235-7|HNF4A_HUMAN Isoform HNF4-Alpha-9 of Hepatocyte nuclear factor 4-alpha OS=Homo sapiens GN=HNF4A;sp|P41235-3|HNF4A_HUMAN Isoform HNF4-Alpha-3 of H	305860000	154290000	21912000	14565000	7347300	236940000	198160000	5	5	5	16.9	16.9	16.9	49.99	0	30.957	460150000	20	16.9	12	13	7	10	5	4	5	4	5	4
82	A0A087WXZ3;Q9Y5A9;S4R3J8;S4R3V3;Q9Y5A9-2	A0A087WXZ3;Q9Y5A9;S4R3J8;S4R3V3;Q9Y5A9-2	YTH domain-containing family protein 2	YTHDF2	tr|A0A087WXZ3|A0A087WXZ3_HUMAN YTH domain-containing family protein 2 OS=Homo sapiens GN=YTHDF2 PE=1 SV=1;sp|Q9Y5A9|YTHD2_HUMAN YTH domain-containing family protein 2 OS=Homo sapiens GN=YTHDF2 PE=1 SV=2;tr|S4R3J8|S4R3J8_HUMAN YTH domain-containing family p	10403000	5050400	702400	472840	229560	0	4845100	2	2	2	4.2	4.2	4.2	61.163	0.0012544	2.7117	15453000	3	4.2	2.3	2	1	5	2	1	2	1	2	1
83	E5RIU6;A0A087WZZ9;A0A087WY43;P06493;P06493-2;K7ELV5;E7ESI2;G3V5T9;P24941-2;P24941;Q00526;G3V317	E5RIU6;A0A087WZZ9;A0A087WY43;P06493;P06493-2	Cyclin-dependent kinase 1	CDK1	tr|E5RIU6|E5RIU6_HUMAN Cyclin-dependent kinase 1 (Fragment) OS=Homo sapiens GN=CDK1 PE=1 SV=2;tr|A0A087WZZ9|A0A087WZZ9_HUMAN Cyclin-dependent kinase 1 OS=Homo sapiens GN=CDK1 PE=1 SV=1;tr|A0A087WY43|A0A087WY43_HUMAN Cyclin-dependent kinase 1 OS=Homo sapien	303560000	19890000	21563000	20237000	1326000	177260000	0	5	5	4	28	28	23.8	21.738	0	8.4518	323450000	10	19	16.9	6	4	12	4	3	4	3	3	2
84	A0A087WY55;Q9NP79;Q5TGM0;Q9NP79-2	A0A087WY55;Q9NP79	Vacuolar protein sorting-associated protein VTA1 homolog	VTA1	tr|A0A087WY55|A0A087WY55_HUMAN Chromosome 6 open reading frame 55, isoform CRA_b OS=Homo sapiens GN=VTA1 PE=1 SV=1;sp|Q9NP79|VTA1_HUMAN Vacuolar protein sorting-associated protein VTA1 homolog OS=Homo sapiens GN=VTA1 PE=1 SV=1	75186000	58874000	10312000	5783500	4528800	56975000	66034000	3	3	3	15.7	15.7	15.7	31.102	0	9.0718	134060000	9	15.7	15.7	5	4	4	3	3	3	3	3	3
85	A0A087WY71;E9PFW3;Q96CW1-2;Q96CW1;C9JJ47;C9JTK4;C9JJD3;C9JPV8;H7C4C3	A0A087WY71;E9PFW3;Q96CW1-2;Q96CW1;C9JJ47	AP-2 complex subunit mu	AP2M1	tr|A0A087WY71|A0A087WY71_HUMAN AP-2 complex subunit mu OS=Homo sapiens GN=AP2M1 PE=1 SV=1;tr|E9PFW3|E9PFW3_HUMAN AP-2 complex subunit mu OS=Homo sapiens GN=AP2M1 PE=1 SV=1;sp|Q96CW1-2|AP2M1_HUMAN Isoform 2 of AP-2 complex subunit mu OS=Homo sapiens GN=AP2M	922270000	1094500000	72027000	32938000	39089000	884370000	1072200000	16	16	10	45.6	45.6	32	49.526	0	212.02	2016800000	86	41.5	38.2	46	40	9	14	14	14	14	9	8
86	A0A087WY82;Q9Y624;Q9Y624-2	A0A087WY82;Q9Y624;Q9Y624-2	Junctional adhesion molecule A	F11R	tr|A0A087WY82|A0A087WY82_HUMAN Junctional adhesion molecule A OS=Homo sapiens GN=F11R PE=1 SV=1;sp|Q9Y624|JAM1_HUMAN Junctional adhesion molecule A OS=Homo sapiens GN=F11R PE=1 SV=1;sp|Q9Y624-2|JAM1_HUMAN Isoform 2 of Junctional adhesion molecule A OS=Homo	425550000	296810000	45147000	26597000	18551000	400670000	341870000	7	7	7	30.8	30.8	30.8	30.197	0	48.25	722360000	41	30.8	22.6	20	21	3	6	5	6	5	6	5
87	A0A087WY88;Q8N5M9	A0A087WY88;Q8N5M9	Protein jagunal homolog 1	JAGN1	tr|A0A087WY88|A0A087WY88_HUMAN Protein jagunal homolog 1 OS=Homo sapiens GN=JAGN1 PE=1 SV=1;sp|Q8N5M9|JAGN1_HUMAN Protein jagunal homolog 1 OS=Homo sapiens GN=JAGN1 PE=1 SV=1	182420000	187820000	52892000	26060000	26831000	194610000	188890000	3	3	3	13.8	13.8	13.8	20.791	0	41.475	370240000	17	13.8	7.2	8	9	2	3	2	3	2	3	2
88	F8W120;F8VWX5;F8VVN7;F8W098;H0YIA4;A0A087WYD4;Q9BVX2-2;Q9BVX2	F8W120;F8VWX5;F8VVN7;F8W098;H0YIA4;A0A087WYD4;Q9BVX2-2;Q9BVX2	Transmembrane protein 106C	TMEM106C	tr|F8W120|F8W120_HUMAN Transmembrane protein 106C OS=Homo sapiens GN=TMEM106C PE=4 SV=1;tr|F8VWX5|F8VWX5_HUMAN Transmembrane protein 106C OS=Homo sapiens GN=TMEM106C PE=4 SV=1;tr|F8VVN7|F8VVN7_HUMAN Transmembrane protein 106C OS=Homo sapiens GN=TMEM106C PE	13175000	0	3293800	3293800	0	8364800	0	1	1	1	26.2	26.2	26.2	7.2499	0.00058207	4.6808	13175000	2	26.2	0	2	0	8	1	0	1	0	1	0
89	A0A087WYD6;Q03519;Q03519-2	A0A087WYD6;Q03519;Q03519-2	Antigen peptide transporter 2	TAP2	tr|A0A087WYD6|A0A087WYD6_HUMAN Antigen peptide transporter 2 OS=Homo sapiens GN=TAP2 PE=1 SV=1;sp|Q03519|TAP2_HUMAN Antigen peptide transporter 2 OS=Homo sapiens GN=TAP2 PE=1 SV=1;sp|Q03519-2|TAP2_HUMAN Isoform 2 of Antigen peptide transporter 2 OS=Homo sa	93789000	126690000	6484800	2758500	3726300	144530000	116370000	6	5	0	10.4	9.3	0	77.596	0	25.51	220480000	16	10.4	8.1	7	9	3	6	4	5	3	0	0
90	H3BN27;A0A087WYE0;Q9Y342	H3BN27;A0A087WYE0;Q9Y342	Plasmolipin	PLLP	tr|H3BN27|H3BN27_HUMAN Plasmolipin OS=Homo sapiens GN=PLLP PE=1 SV=1;tr|A0A087WYE0|A0A087WYE0_HUMAN Plasmolipin OS=Homo sapiens GN=PLLP PE=1 SV=1;sp|Q9Y342|PLLP_HUMAN Plasmolipin OS=Homo sapiens GN=PLLP PE=1 SV=1	683310000	808850000	298430000	136660000	161770000	1138500000	939750000	2	2	2	23.4	23.4	23.4	13.105	0	69.42	1492200000	19	23.4	23.4	10	9	3	2	2	2	2	2	2
91	A0A087WYF7;Q6UXV4;A0A087WUX8	A0A087WYF7;Q6UXV4;A0A087WUX8	MICOS complex subunit MIC27	APOOL	tr|A0A087WYF7|A0A087WYF7_HUMAN MICOS complex subunit MIC27 OS=Homo sapiens GN=APOOL PE=1 SV=1;sp|Q6UXV4|MIC27_HUMAN MICOS complex subunit MIC27 OS=Homo sapiens GN=APOOL PE=1 SV=1;tr|A0A087WUX8|A0A087WUX8_HUMAN MICOS complex subunit MIC27 OS=Homo sapiens GN	268850000	224430000	30830000	16803000	14027000	307560000	199680000	5	5	5	27.6	27.6	27.6	29.205	0	55.483	493280000	15	27.6	27.6	9	6	3	5	5	5	5	5	5
92	C9J979;C9IYS7;A0A087WYI0;Q5TA45-2;Q5TA45-4;Q5TA45-3;Q5TA45;Q5TA45-5	C9J979;C9IYS7;A0A087WYI0;Q5TA45-2;Q5TA45-4;Q5TA45-3;Q5TA45;Q5TA45-5	Integrator complex subunit 11	CPSF3L	tr|C9J979|C9J979_HUMAN Integrator complex subunit 11 (Fragment) OS=Homo sapiens GN=CPSF3L PE=1 SV=2;tr|C9IYS7|C9IYS7_HUMAN Cleavage and polyadenylation specific factor 3-like, isoform CRA_i OS=Homo sapiens GN=CPSF3L PE=1 SV=1;tr|A0A087WYI0|A0A087WYI0_HUMAN	7617100	7663900	804260	400900	403360	9912900	8306700	1	1	1	2.9	2.9	2.9	38.987	0.008937	1.9561	15281000	5	2.9	2.9	3	2	8	1	1	1	1	1	1
93	A0A087WYN9;Q7Z478;H0Y8L1	A0A087WYN9;Q7Z478	ATP-dependent RNA helicase DHX29	DHX29	tr|A0A087WYN9|A0A087WYN9_HUMAN ATP-dependent RNA helicase DHX29 OS=Homo sapiens GN=DHX29 PE=1 SV=1;sp|Q7Z478|DHX29_HUMAN ATP-dependent RNA helicase DHX29 OS=Homo sapiens GN=DHX29 PE=1 SV=2	19265000	0	234940	234940	0	20167000	0	3	3	3	2.8	2.8	2.8	155.29	0.00055648	3.9315	19265000	4	2.8	0	4	0	3	3	0	3	0	3	0
94	A0A087WYR0;P09132;A0A087WWU9	A0A087WYR0;P09132;A0A087WWU9	Signal recognition particle 19 kDa protein	SRP19	tr|A0A087WYR0|A0A087WYR0_HUMAN Signal recognition particle 19 kDa protein OS=Homo sapiens GN=SRP19 PE=1 SV=1;sp|P09132|SRP19_HUMAN Signal recognition particle 19 kDa protein OS=Homo sapiens GN=SRP19 PE=1 SV=3;tr|A0A087WWU9|A0A087WWU9_HUMAN HCG2039564, isof	5261000	22848000	4015600	751580	3264000	0	26018000	2	2	2	21.7	21.7	21.7	13.654	0.0012661	2.7704	28109000	3	10	11.7	1	2	3	1	1	1	1	1	1
95	A0A087WYR3;O43399;O43399-5;O43399-7;A0A087WZ51	A0A087WYR3;O43399;O43399-5;O43399-7;A0A087WZ51	Tumor protein D54	TPD52L2	tr|A0A087WYR3|A0A087WYR3_HUMAN Tumor protein D54 OS=Homo sapiens GN=TPD52L2 PE=1 SV=1;sp|O43399|TPD54_HUMAN Tumor protein D54 OS=Homo sapiens GN=TPD52L2 PE=1 SV=2;sp|O43399-5|TPD54_HUMAN Isoform 5 of Tumor protein D54 OS=Homo sapiens GN=TPD52L2;sp|O43399-7	855790000	737720000	93736000	50340000	43395000	858440000	897100000	8	8	1	39.2	39.2	5.9	23.764	0	229.92	1593500000	46	39.2	39.2	23	23	5	8	8	8	8	1	1
96	A0A087WYS1;E7EUC7;Q16851-2;Q16851;C9JVG3;C9JQU9;C9JNZ1;C9JWG0;C9JTZ5;C9JUW1;F2Z3H1	A0A087WYS1;E7EUC7;Q16851-2;Q16851;C9JVG3;C9JQU9;C9JNZ1	UTP--glucose-1-phosphate uridylyltransferase	UGP2	tr|A0A087WYS1|A0A087WYS1_HUMAN UTP--glucose-1-phosphate uridylyltransferase OS=Homo sapiens GN=UGP2 PE=1 SV=1;tr|E7EUC7|E7EUC7_HUMAN UTP--glucose-1-phosphate uridylyltransferase OS=Homo sapiens GN=UGP2 PE=1 SV=1;sp|Q16851-2|UGPA_HUMAN Isoform 2 of UTP--glu	369060000	287540000	21181000	11905000	9275500	257850000	298620000	9	9	9	23	23	23	56.967	0	60.529	656600000	32	23	21.3	19	13	11	9	7	9	7	9	7
97	A0A087WYT3;Q15185-3;Q15185-4;Q15185;B4DDC6;Q15185-2	A0A087WYT3;Q15185-3;Q15185-4;Q15185	Prostaglandin E synthase 3	PTGES3	tr|A0A087WYT3|A0A087WYT3_HUMAN Prostaglandin E synthase 3 OS=Homo sapiens GN=PTGES3 PE=1 SV=1;sp|Q15185-3|TEBP_HUMAN Isoform 3 of Prostaglandin E synthase 3 OS=Homo sapiens GN=PTGES3;sp|Q15185-4|TEBP_HUMAN Isoform 4 of Prostaglandin E synthase 3 OS=Homo sa	293830000	75643000	41052000	32648000	8404700	302350000	65578000	4	4	4	28.7	28.7	28.7	19.155	0	23.239	369470000	8	28.7	14.6	8	0	6	4	2	4	2	4	2
98	A0A087WYW3;P30414	A0A087WYW3;P30414	NK-tumor recognition protein;Putative peptidyl-prolyl cis-trans isomerase	NKTR	tr|A0A087WYW3|A0A087WYW3_HUMAN NK-tumor recognition protein OS=Homo sapiens GN=NKTR PE=1 SV=1;sp|P30414|NKTR_HUMAN NK-tumor recognition protein OS=Homo sapiens GN=NKTR PE=1 SV=2	9960500	22472000	559180	171730	387450	0	25862000	2	2	2	2.7	2.7	2.7	131.82	0.0024795	2.5798	32432000	3	1.5	1.2	1	2	2	1	1	1	1	1	1
99	A0A087WYX2	A0A087WYX2		PHF8	tr|A0A087WYX2|A0A087WYX2_HUMAN Histone lysine demethylase PHF8 OS=Homo sapiens GN=PHF8 PE=1 SV=1	221260000	221590000	29523000	14751000	14773000	327860000	254740000	1	1	1	5	5	5	33.843	0.0080531	2.0103	442850000	8	5	5	5	3	1	1	1	1	1	1	1
100	A0A087WZ13;E9PAU2;Q8IY67;Q8IY67-2	A0A087WZ13;E9PAU2;Q8IY67;Q8IY67-2	Ribonucleoprotein PTB-binding 1	RAVER1	tr|A0A087WZ13|A0A087WZ13_HUMAN Ribonucleoprotein PTB-binding 1 OS=Homo sapiens GN=RAVER1 PE=1 SV=1;tr|E9PAU2|E9PAU2_HUMAN Ribonucleoprotein PTB-binding 1 OS=Homo sapiens GN=RAVER1 PE=1 SV=1;sp|Q8IY67|RAVR1_HUMAN Ribonucleoprotein PTB-binding 1 OS=Homo sapi	66215000	15107000	2541300	2069200	472090	73679000	0	5	5	5	13	13	13	77.843	0	9.1567	81322000	6	11.5	1.5	5	1	4	4	1	4	1	4	1
101	A0A087X0J3;A0A087WZ15;P40123-2;P40123;B7Z385;E9PDI2;F8WEW0;F8WDB9;P40123-3	A0A087X0J3;A0A087WZ15;P40123-2;P40123;B7Z385;E9PDI2	Adenylyl cyclase-associated protein;Adenylyl cyclase-associated protein 2	CAP2	tr|A0A087X0J3|A0A087X0J3_HUMAN Adenylyl cyclase-associated protein 2 OS=Homo sapiens GN=CAP2 PE=1 SV=1;tr|A0A087WZ15|A0A087WZ15_HUMAN Adenylyl cyclase-associated protein 2 OS=Homo sapiens GN=CAP2 PE=1 SV=1;sp|P40123-2|CAP2_HUMAN Isoform 2 of Adenylyl cycla	20260000	15094000	1359800	779220	580550	25476000	16150000	5	4	4	16	14	14	43.53	0	8.6363	35354000	7	14	13.2	3	4	9	4	4	3	3	3	3
102	H0YCW6;A0A087WZ62;Q9H6U8-2;Q9H6U8-4;Q9H6U8;Q9H6U8-3	H0YCW6;A0A087WZ62;Q9H6U8-2;Q9H6U8-4;Q9H6U8;Q9H6U8-3	Alpha-1,2-mannosyltransferase ALG9	ALG9	tr|H0YCW6|H0YCW6_HUMAN Alpha-1,2-mannosyltransferase ALG9 (Fragment) OS=Homo sapiens GN=ALG9 PE=4 SV=1;tr|A0A087WZ62|A0A087WZ62_HUMAN Alpha-1,2-mannosyltransferase ALG9 OS=Homo sapiens GN=ALG9 PE=4 SV=1;sp|Q9H6U8-2|ALG9_HUMAN Isoform 2 of Alpha-1,2-mannosy	72485000	122640000	15010000	5575800	9434200	91019000	118430000	7	7	7	42.5	42.5	42.5	24.198	0	14.866	195130000	13	29	32.4	6	7	6	5	4	5	4	5	4
103	A0A087WZH7;P29966	A0A087WZH7;P29966	Myristoylated alanine-rich C-kinase substrate	MARCKS	tr|A0A087WZH7|A0A087WZH7_HUMAN Myristoylated alanine-rich C-kinase substrate OS=Homo sapiens GN=MARCKS PE=1 SV=1;sp|P29966|MARCS_HUMAN Myristoylated alanine-rich C-kinase substrate OS=Homo sapiens GN=MARCKS PE=1 SV=4	915320000	867180000	104850000	53842000	51011000	968760000	785270000	6	6	6	37.3	37.3	37.3	31.595	0	168.04	1782500000	37	27.6	37.3	17	20	2	5	6	5	6	5	6
104	A0A087WZM2;J3QQ64;A0A087WWI1;O00584-2;Q07343-4;Q07343-2;Q07343-3;Q07343	A0A087WZM2		RNASET2	tr|A0A087WZM2|A0A087WZM2_HUMAN Ribonuclease T2 OS=Homo sapiens GN=RNASET2 PE=1 SV=1	0	3418300	162780	0	162780	0	3934100	6	1	1	25.5	5.6	5.6	34.926	1	-2	3418300	1	15.4	23.5	0	1	8	4	5	0	1	0	1
105	A0A087WZN1;O43837;A0A087X2E5;O43837-2;O43837-3	A0A087WZN1;O43837;A0A087X2E5;O43837-2	Isocitrate dehydrogenase [NAD] subunit, mitochondrial;Isocitrate dehydrogenase [NAD] subunit beta, mitochondrial	IDH3B	tr|A0A087WZN1|A0A087WZN1_HUMAN Isocitrate dehydrogenase 3 (NAD+) beta, isoform CRA_d OS=Homo sapiens GN=IDH3B PE=1 SV=1;sp|O43837|IDH3B_HUMAN Isocitrate dehydrogenase [NAD] subunit beta, mitochondrial OS=Homo sapiens GN=IDH3B PE=1 SV=2;tr|A0A087X2E5|A0A087	1842500000	1274100000	135510000	80109000	55397000	1649000000	1627200000	17	17	17	52.2	52.2	52.2	42.41	0	128.31	3116600000	89	47.8	46.8	49	40	5	15	14	15	14	15	14
106	A0A087WZR3;H9KVA9;P46736-4;P46736-2;P46736-3;P46736;X6RJS7	A0A087WZR3;H9KVA9;P46736-4;P46736-2;P46736-3;P46736;X6RJS7	Lys-63-specific deubiquitinase BRCC36	BRCC3	tr|A0A087WZR3|A0A087WZR3_HUMAN Lys-63-specific deubiquitinase BRCC36 OS=Homo sapiens GN=BRCC3 PE=1 SV=1;tr|H9KVA9|H9KVA9_HUMAN Lys-63-specific deubiquitinase BRCC36 OS=Homo sapiens GN=BRCC3 PE=1 SV=2;sp|P46736-4|BRCC3_HUMAN Isoform 4 of Lys-63-specific deu	0	28296000	1664500	0	1664500	0	28225000	2	2	2	9.2	9.2	9.2	33.404	0.001023	2.8898	28296000	3	4.1	5.1	1	2	7	1	1	1	1	1	1
107	A0A087X105;A0A087WZW4;A0A087X1W8;A0A087WZR6;X5DQS5;Q9BY67-5;Q9BY67;Q9BY67-4;Q9BY67-3;A0A087X0T8;Q9BY67-2;F5H125;F5H8J9;H0YG94;F5H0H5	A0A087X105;A0A087WZW4;A0A087X1W8;A0A087WZR6;X5DQS5;Q9BY67-5;Q9BY67;Q9BY67-4;Q9BY67-3;A0A087X0T8;Q9BY67-2;F5H125	Cell adhesion molecule 1	CADM1	tr|A0A087X105|A0A087X105_HUMAN Cell adhesion molecule 1 OS=Homo sapiens GN=CADM1 PE=1 SV=1;tr|A0A087WZW4|A0A087WZW4_HUMAN Cell adhesion molecule 1 OS=Homo sapiens GN=CADM1 PE=1 SV=1;tr|A0A087X1W8|A0A087X1W8_HUMAN Cell adhesion molecule 1 OS=Homo sapiens GN	1218900000	983890000	88112000	48757000	39355000	1078600000	1083900000	8	8	8	33.2	33.2	33.2	41.667	0	155.83	2202800000	55	33.2	27.6	33	22	15	8	6	8	6	8	6
108	A0A087WZT2;Q6UX53	A0A087WZT2;Q6UX53	Methyltransferase-like protein 7B	METTL7B	tr|A0A087WZT2|A0A087WZT2_HUMAN Methyltransferase-like protein 7B OS=Homo sapiens GN=METTL7B PE=4 SV=1;sp|Q6UX53|MET7B_HUMAN Methyltransferase-like protein 7B OS=Homo sapiens GN=METTL7B PE=2 SV=2	99691000	152760000	15778000	6230700	9547800	112860000	105140000	8	8	8	35.1	35.1	35.1	31.288	0	17.194	252460000	11	13	27.2	4	7	2	3	6	3	6	3	6
109	E5RGN0;A0A087WZU2;Q00536;Q00536-3;Q00536-2;H0YAZ9	E5RGN0;A0A087WZU2;Q00536;Q00536-3;Q00536-2;H0YAZ9	Cyclin-dependent kinase 16	CDK16	tr|E5RGN0|E5RGN0_HUMAN Cyclin-dependent kinase 16 (Fragment) OS=Homo sapiens GN=CDK16 PE=1 SV=1;tr|A0A087WZU2|A0A087WZU2_HUMAN Cyclin-dependent kinase 16 OS=Homo sapiens GN=CDK16 PE=1 SV=1;sp|Q00536|CDK16_HUMAN Cyclin-dependent kinase 16 OS=Homo sapiens GN	3178400	1766100	190180	122250	67928	2018000	0	3	2	2	10.2	8.1	8.1	44.129	0.00054975	3.756	4944600	3	6.4	5.9	2	1	6	2	2	1	1	1	1
110	D6R9P3;D6RD18;D6RBZ0;A0A087WZV1;Q99729-3;Q99729-2;Q99729-4;Q99729	D6R9P3;D6RD18;D6RBZ0;A0A087WZV1;Q99729-3;Q99729-2;Q99729-4;Q99729	Heterogeneous nuclear ribonucleoprotein A/B	HNRNPAB	tr|D6R9P3|D6R9P3_HUMAN Heterogeneous nuclear ribonucleoprotein A/B OS=Homo sapiens GN=HNRNPAB PE=1 SV=1;tr|D6RD18|D6RD18_HUMAN Heterogeneous nuclear ribonucleoprotein A/B OS=Homo sapiens GN=HNRNPAB PE=1 SV=1;tr|D6RBZ0|D6RBZ0_HUMAN Heterogeneous nuclear rib	2008400000	2472700000	320080000	143460000	176620000	2255600000	2573800000	13	13	13	36.4	36.4	36.4	30.302	0	85.528	4481200000	103	36.4	35.4	47	56	8	12	10	12	10	12	10
111	A0A087WZV9;Q8TEA8	A0A087WZV9;Q8TEA8	D-tyrosyl-tRNA(Tyr) deacylase;D-tyrosyl-tRNA(Tyr) deacylase 1	DTD1	tr|A0A087WZV9|A0A087WZV9_HUMAN D-tyrosyl-tRNA(Tyr) deacylase 1 (Fragment) OS=Homo sapiens GN=DTD1 PE=1 SV=1;sp|Q8TEA8|DTD1_HUMAN D-tyrosyl-tRNA(Tyr) deacylase 1 OS=Homo sapiens GN=DTD1 PE=1 SV=2	14807000	0	1645200	1645200	0	14807000	0	1	1	1	12.1	12.1	12.1	25.353	0.00056402	4.1421	14807000	2	12.1	0	2	0	2	1	0	1	0	1	0
112	A0A087X020;Q9Y3A5;F8WE72	A0A087X020;Q9Y3A5	Ribosome maturation protein SBDS	SBDS	tr|A0A087X020|A0A087X020_HUMAN Ribosome maturation protein SBDS OS=Homo sapiens GN=SBDS PE=1 SV=1;sp|Q9Y3A5|SBDS_HUMAN Ribosome maturation protein SBDS OS=Homo sapiens GN=SBDS PE=1 SV=4	25300000	0	1488200	1488200	0	21042000	0	3	3	3	11.2	11.2	11.2	28.864	0.00055021	3.764	25300000	4	11.2	0	4	0	3	3	0	3	0	3	0
113	A0A087X028;Q9NZT2-2;Q9NZT2	A0A087X028;Q9NZT2-2;Q9NZT2	Opioid growth factor receptor	OGFR	tr|A0A087X028|A0A087X028_HUMAN Opioid growth factor receptor OS=Homo sapiens GN=OGFR PE=1 SV=1;sp|Q9NZT2-2|OGFR_HUMAN Isoform 2 of Opioid growth factor receptor OS=Homo sapiens GN=OGFR;sp|Q9NZT2|OGFR_HUMAN Opioid growth factor receptor OS=Homo sapiens GN=O	34640000	36151000	3371000	1649500	1721500	57434000	46633000	1	1	1	4.1	4.1	4.1	44.756	0.00053865	3.4733	70792000	3	4.1	4.1	2	1	3	1	1	1	1	1	1
114	A0A087X1E7;A0A087X078;V9H019;E9PHA6;P43246;V9H0B2;P43246-2;V9H015	A0A087X1E7;A0A087X078;V9H019;E9PHA6;P43246;V9H0B2;P43246-2	DNA mismatch repair protein Msh2	MSH2	tr|A0A087X1E7|A0A087X1E7_HUMAN DNA mismatch repair protein Msh2 OS=Homo sapiens GN=MSH2 PE=1 SV=1;tr|A0A087X078|A0A087X078_HUMAN DNA mismatch repair protein Msh2 OS=Homo sapiens GN=MSH2 PE=1 SV=1;tr|V9H019|V9H019_HUMAN DNA mismatch repair protein Msh2 OS=H	32885000	46393000	2331700	967210	1364500	50356000	30227000	3	3	3	9.3	9.3	9.3	54.777	0	8.6959	79278000	7	6.4	9.3	3	4	8	2	3	2	3	2	3
115	A0A087X084;E9PBP8;P16662;D6RH08	A0A087X084;E9PBP8;P16662;D6RH08	UDP-glucuronosyltransferase 2B7	UGT2B7	tr|A0A087X084|A0A087X084_HUMAN UDP-glucuronosyltransferase 2B7 OS=Homo sapiens GN=UGT2B7 PE=4 SV=1;tr|E9PBP8|E9PBP8_HUMAN UDP-glucuronosyltransferase 2B7 OS=Homo sapiens GN=UGT2B7 PE=4 SV=1;sp|P16662|UD2B7_HUMAN UDP-glucuronosyltransferase 2B7 OS=Homo sapi	22145000	4606900	1573600	1302600	270990	0	5914500	2	2	2	7.8	7.8	7.8	38.547	0.00057753	4.5162	26751000	3	4.2	3.6	2	1	4	1	1	1	1	1	1
116	A0A087X0D5;P09668;E9PKT6	A0A087X0D5;P09668	Pro-cathepsin H;Cathepsin H mini chain;Cathepsin H;Cathepsin H heavy chain;Cathepsin H light chain	CTSH	tr|A0A087X0D5|A0A087X0D5_HUMAN Pro-cathepsin H OS=Homo sapiens GN=CTSH PE=1 SV=1;sp|P09668|CATH_HUMAN Pro-cathepsin H OS=Homo sapiens GN=CTSH PE=1 SV=4	75274000	29744000	6563700	4704600	1859000	65044000	37415000	5	5	5	22.9	22.9	22.9	36.269	0	9.9625	105020000	9	20.1	21.7	3	6	3	4	4	4	4	4	4
117	A0A087X0I4;M0QXB4;O14579;O14579-2;O14579-3;M0R061	A0A087X0I4;M0QXB4;O14579;O14579-2;O14579-3;M0R061	Coatomer subunit epsilon	COPE	tr|A0A087X0I4|A0A087X0I4_HUMAN Coatomer subunit epsilon OS=Homo sapiens GN=COPE PE=1 SV=1;tr|M0QXB4|M0QXB4_HUMAN Coatomer protein complex, subunit epsilon, isoform CRA_g OS=Homo sapiens GN=COPE PE=1 SV=1;sp|O14579|COPE_HUMAN Coatomer subunit epsilon OS=Hom	236870000	179780000	18939000	10767000	8171700	263500000	285850000	6	6	6	34.9	34.9	34.9	34.51	0	55.889	416650000	23	30.3	16.9	12	11	6	5	4	5	4	5	4
118	A0A087X0K1;Q9Y376	A0A087X0K1;Q9Y376	Calcium-binding protein 39	CAB39	tr|A0A087X0K1|A0A087X0K1_HUMAN Calcium-binding protein 39 OS=Homo sapiens GN=CAB39 PE=1 SV=1;sp|Q9Y376|CAB39_HUMAN Calcium-binding protein 39 OS=Homo sapiens GN=CAB39 PE=1 SV=1	9484400	139730000	6217100	395180	5821900	8517700	176280000	2	2	2	5.9	5.9	5.9	39.452	0.00079872	3.3147	149210000	3	5.9	2.7	2	1	2	2	1	2	1	2	1
119	A0A087X0K9;G5E9E7;Q07157-2;G3V1L9;Q07157;H0Y3R8;H0YKB1	A0A087X0K9;G5E9E7;Q07157-2;G3V1L9;Q07157	Tight junction protein ZO-1	TJP1	tr|A0A087X0K9|A0A087X0K9_HUMAN Tight junction protein ZO-1 OS=Homo sapiens GN=TJP1 PE=1 SV=1;tr|G5E9E7|G5E9E7_HUMAN Tight junction protein 1 (Zona occludens 1), isoform CRA_e OS=Homo sapiens GN=TJP1 PE=1 SV=1;sp|Q07157-2|ZO1_HUMAN Isoform Short of Tight ju	236770000	45016000	2709500	2276600	432850	145430000	95037000	11	11	11	9.5	9.5	9.5	187.85	0	41.972	281780000	23	8.2	5.2	13	10	7	10	6	10	6	10	6
120	A0A087X0M4;Q9BWU0;A0A087WWF4	A0A087X0M4;Q9BWU0;A0A087WWF4	Kanadaptin	SLC4A1AP	tr|A0A087X0M4|A0A087X0M4_HUMAN Kanadaptin OS=Homo sapiens GN=SLC4A1AP PE=1 SV=1;sp|Q9BWU0|NADAP_HUMAN Kanadaptin OS=Homo sapiens GN=SLC4A1AP PE=1 SV=1;tr|A0A087WWF4|A0A087WWF4_HUMAN Kanadaptin (Fragment) OS=Homo sapiens GN=SLC4A1AP PE=1 SV=1	31390000	0	640610	640610	0	22908000	0	2	2	2	2.7	2.7	2.7	82.89	0.00079766	3.3042	31390000	4	2.7	0	4	0	3	2	0	2	0	2	0
121	A0A087X0R7;Q9H4L4;J3KSF5;J3QRE4;A0A087WV50;J3QL36	A0A087X0R7;Q9H4L4	Sentrin-specific protease 3	SENP3-EIF4A1;SENP3	tr|A0A087X0R7|A0A087X0R7_HUMAN Protein SENP3-EIF4A1 (Fragment) OS=Homo sapiens GN=SENP3-EIF4A1 PE=4 SV=1;sp|Q9H4L4|SENP3_HUMAN Sentrin-specific protease 3 OS=Homo sapiens GN=SENP3 PE=1 SV=2	16147000	10335000	1103400	672790	430630	0	11894000	3	3	3	7.8	7.8	7.8	61.277	0	11.129	26482000	8	7.8	5.7	5	3	6	3	2	3	2	3	2
122	A0A087X0W7;A0A087WT95;P49753;P49753-2	A0A087X0W7;A0A087WT95;P49753;P49753-2	Acyl-coenzyme A thioesterase 2, mitochondrial	ACOT2	tr|A0A087X0W7|A0A087X0W7_HUMAN Acyl-coenzyme A thioesterase 2, mitochondrial OS=Homo sapiens GN=ACOT2 PE=4 SV=1;tr|A0A087WT95|A0A087WT95_HUMAN Acyl-coenzyme A thioesterase 2, mitochondrial OS=Homo sapiens GN=ACOT2 PE=4 SV=1;sp|P49753|ACOT2_HUMAN Acyl-coenz	2633700000	2560200000	192370000	97543000	94823000	2281700000	2441300000	22	22	2	74.1	74.1	7.1	46.292	0	323.31	5193900000	129	67.9	61.3	63	66	4	20	19	20	19	2	1
123	A0A087X0Z7;H0YJ66;Q9Y394-2;Q9Y394;H0YJR8;H0YJE4	A0A087X0Z7;H0YJ66;Q9Y394-2;Q9Y394;H0YJR8	Dehydrogenase/reductase SDR family member 7	DHRS7	tr|A0A087X0Z7|A0A087X0Z7_HUMAN Dehydrogenase/reductase SDR family member 7 OS=Homo sapiens GN=DHRS7 PE=1 SV=1;tr|H0YJ66|H0YJ66_HUMAN Dehydrogenase/reductase SDR family member 7 (Fragment) OS=Homo sapiens GN=DHRS7 PE=1 SV=1;sp|Q9Y394-2|DHRS7_HUMAN Isoform 2	273410000	257610000	24137000	12428000	11710000	224230000	300230000	7	7	7	25.5	25.5	25.5	42.619	0	37.111	531020000	39	23.7	25.5	18	21	6	6	7	6	7	6	7
124	A0A087X117;Q15155;A0A087WW46;H3BUC9;I3L0Q6;H3BTW1	A0A087X117;Q15155;A0A087WW46	Nodal modulator 1	NOMO1	tr|A0A087X117|A0A087X117_HUMAN Nodal modulator 1 OS=Homo sapiens GN=NOMO1 PE=4 SV=1;sp|Q15155|NOMO1_HUMAN Nodal modulator 1 OS=Homo sapiens GN=NOMO1 PE=1 SV=5;tr|A0A087WW46|A0A087WW46_HUMAN Nodal modulator 1 OS=Homo sapiens GN=NOMO1 PE=4 SV=1	0	26068000	362060	0	362060	0	25009000	42	1	1	51.8	1.3	1.3	139.47	0	10.308	26068000	1	49.6	48.2	0	1	6	40	39	0	1	0	1
125	H7C3I1;A0A087X1H6;P50502;F6VDH7;Q3KNR6;Q8IZP2;Q8NFI4	H7C3I1;A0A087X1H6;P50502;F6VDH7;Q3KNR6;Q8IZP2;Q8NFI4	Hsc70-interacting protein;Putative protein FAM10A4;Putative protein FAM10A5	ST13;ST13P4;ST13P5	tr|H7C3I1|H7C3I1_HUMAN Hsc70-interacting protein (Fragment) OS=Homo sapiens GN=ST13 PE=4 SV=1;tr|A0A087X1H6|A0A087X1H6_HUMAN Hsc70-interacting protein OS=Homo sapiens GN=ST13 PE=4 SV=1;sp|P50502|F10A1_HUMAN Hsc70-interacting protein OS=Homo sapiens GN=ST13	96096000	50797000	16322000	10677000	5644100	99697000	68193000	6	6	6	44.5	44.5	44.5	16.219	0	14.931	146890000	9	38.4	15.8	7	2	7	5	2	5	2	5	2
126	A0A087X1K9;E5RGR0;O75608-2;O75608;B4DP64;E5RJ48	A0A087X1K9;E5RGR0;O75608-2;O75608;B4DP64	Acyl-protein thioesterase 1	LYPLA1	tr|A0A087X1K9|A0A087X1K9_HUMAN Acyl-protein thioesterase 1 OS=Homo sapiens GN=LYPLA1 PE=1 SV=1;tr|E5RGR0|E5RGR0_HUMAN Acyl-protein thioesterase 1 (Fragment) OS=Homo sapiens GN=LYPLA1 PE=1 SV=1;sp|O75608-2|LYPA1_HUMAN Isoform 2 of Acyl-protein thioesterase	104600000	135790000	21853000	9509300	12344000	147920000	161720000	3	3	3	30.7	30.7	30.7	17.981	0	18.607	240390000	16	30.7	30.7	6	10	6	3	3	3	3	3	3
127	F8WC38;X6RLL4;A0A087X1N3;O75818-2;O75818	F8WC38;X6RLL4;A0A087X1N3;O75818-2;O75818	Ribonuclease P protein subunit p40	RPP40	tr|F8WC38|F8WC38_HUMAN Ribonuclease P protein subunit p40 OS=Homo sapiens GN=RPP40 PE=4 SV=1;tr|X6RLL4|X6RLL4_HUMAN Ribonuclease P protein subunit p40 OS=Homo sapiens GN=RPP40 PE=4 SV=1;tr|A0A087X1N3|A0A087X1N3_HUMAN Ribonuclease P 40kDa subunit, isoform C	22299000	0	2787400	2787400	0	14158000	0	1	1	1	15.9	15.9	15.9	13.491	0.00079407	3.2662	22299000	2	15.9	0	2	0	5	1	0	1	0	1	0
128	A0A087X1R5;Q13123;Q9H4P6;E7EQZ7;D6REL4;D6RCQ4;D6RAY9	A0A087X1R5;Q13123;Q9H4P6;E7EQZ7	Protein Red	IK	tr|A0A087X1R5|A0A087X1R5_HUMAN IK cytokine, down-regulator of HLA II, isoform CRA_a OS=Homo sapiens GN=IK PE=1 SV=1;sp|Q13123|RED_HUMAN Protein Red OS=Homo sapiens GN=IK PE=1 SV=3;tr|Q9H4P6|Q9H4P6_HUMAN Clone TCCCIA00142 mRNA sequence OS=Homo sapiens GN=IK	176530000	74543000	8657500	6087100	2570500	154990000	77669000	5	5	5	9.7	9.7	9.7	65.654	0	12.586	251070000	18	8.6	4.1	13	5	7	4	3	4	3	4	3
129	A0A087X1U6;A0A075B730	A0A087X1U6;A0A075B730		EPPK1	tr|A0A087X1U6|A0A087X1U6_HUMAN Epiplakin OS=Homo sapiens GN=EPPK1 PE=1 SV=1;tr|A0A075B730|A0A075B730_HUMAN Epiplakin OS=Homo sapiens GN=EPPK1 PE=1 SV=2	1316600000	960590000	7298700	4219900	3078800	1217900000	875560000	53	47	3	43.3	37.3	1.2	555.65	0	323.31	2277200000	146	39.8	36.3	72	74	2	44	39	38	33	3	3
130	A0A087X1W5;Q9BW19	A0A087X1W5;Q9BW19	Kinesin-like protein;Kinesin-like protein KIFC1	KIFC1	tr|A0A087X1W5|A0A087X1W5_HUMAN Kinesin-like protein KIFC1 (Fragment) OS=Homo sapiens GN=KIFC1 PE=1 SV=1;sp|Q9BW19|KIFC1_HUMAN Kinesin-like protein KIFC1 OS=Homo sapiens GN=KIFC1 PE=1 SV=2	0	0	0	0	0	0	0	1	1	1	11.7	11.7	11.7	16.711	0.0014948	2.6459	0	1	11.7	0	1	0	2	1	0	1	0	1	0
131	A0A087X1Z3;Q9UL46;H0YM70	A0A087X1Z3;Q9UL46;H0YM70	Proteasome activator complex subunit 2	PSME2	tr|A0A087X1Z3|A0A087X1Z3_HUMAN Proteasome activator complex subunit 2 OS=Homo sapiens GN=PSME2 PE=1 SV=1;sp|Q9UL46|PSME2_HUMAN Proteasome activator complex subunit 2 OS=Homo sapiens GN=PSME2 PE=1 SV=4;tr|H0YM70|H0YM70_HUMAN Proteasome activator complex sub	619760000	1368700000	104650000	32619000	72035000	1355300000	690450000	7	7	7	33.5	33.5	33.5	29.126	0	117.24	1988400000	55	33.5	22.4	24	31	3	6	5	6	5	6	5
132	A0A087X1Z7;P25445-6;P25445	A0A087X1Z7;P25445-6;P25445	Tumor necrosis factor receptor superfamily member 6	FAS	tr|A0A087X1Z7|A0A087X1Z7_HUMAN Tumor necrosis factor receptor superfamily member 6 OS=Homo sapiens GN=FAS PE=1 SV=1;sp|P25445-6|TNR6_HUMAN Isoform 6 of Tumor necrosis factor receptor superfamily member 6 OS=Homo sapiens GN=FAS;sp|P25445|TNR6_HUMAN Tumor ne	28666000	0	2205100	2205100	0	18200000	0	1	1	1	10.6	10.6	10.6	28.534	0.00032144	6.9992	28666000	3	10.6	10.6	2	1	3	1	1	1	1	1	1
133	A0A087X271;B4DDF4;B4DUT8;Q99439;A0A087X1X5;H3BVI6;Q99439-2;U3KPS3;K7ES69;H3BQH0	A0A087X271;B4DDF4;B4DUT8;Q99439;A0A087X1X5;H3BVI6;Q99439-2	Calponin;Calponin-2	CNN2	tr|A0A087X271|A0A087X271_HUMAN Calponin-2 (Fragment) OS=Homo sapiens GN=CNN2 PE=1 SV=1;tr|B4DDF4|B4DDF4_HUMAN Calponin OS=Homo sapiens GN=CNN2 PE=1 SV=1;tr|B4DUT8|B4DUT8_HUMAN Calponin OS=Homo sapiens GN=CNN2 PE=1 SV=1;sp|Q99439|CNN2_HUMAN Calponin-2 OS=Ho	35505000	35745000	6477300	3227700	3249600	48619000	33360000	3	3	3	24.6	24.6	24.6	19.757	0.00031786	6.7072	71251000	6	16.8	17.3	2	4	10	2	2	2	2	2	2
134	A0A087X294;Q13177;O75914-2;O75914;O75914-4;O75914-3;H7C1X3;H0YCG5;E9PM17;B3KNX7;Q13153;Q13153-2;B1AKS5	A0A087X294;Q13177;O75914-2;O75914;O75914-4;O75914-3;H7C1X3;H0YCG5;E9PM17;B3KNX7;Q13153;Q13153-2	Non-specific serine/threonine protein kinase;Serine/threonine-protein kinase PAK 2;PAK-2p27;PAK-2p34;Serine/threonine-protein kinase PAK 3;Serine/threonine-protein kinase PAK 1	PAK3;PAK2;PAK1	tr|A0A087X294|A0A087X294_HUMAN Serine/threonine-protein kinase PAK 3 OS=Homo sapiens GN=PAK3 PE=4 SV=1;sp|Q13177|PAK2_HUMAN Serine/threonine-protein kinase PAK 2 OS=Homo sapiens GN=PAK2 PE=1 SV=3;sp|O75914-2|PAK3_HUMAN Isoform 2 of Serine/threonine-protein	121250000	71762000	7148400	4490600	2657800	194360000	90381000	4	4	4	9.8	9.8	9.8	60.626	0	8.909	193010000	6	9.8	2	4	2	13	4	1	4	1	4	1
135	E9PDU5;A0A087X295;Q9NNW5;Q6PKC6;E9PBK6	E9PDU5;A0A087X295;Q9NNW5;Q6PKC6;E9PBK6	WD repeat-containing protein 6	WDR6	tr|E9PDU5|E9PDU5_HUMAN WD repeat-containing protein 6 OS=Homo sapiens GN=WDR6 PE=4 SV=1;tr|A0A087X295|A0A087X295_HUMAN WD repeat-containing protein 6 OS=Homo sapiens GN=WDR6 PE=1 SV=1;sp|Q9NNW5|WDR6_HUMAN WD repeat-containing protein 6 OS=Homo sapiens GN=W	15457000	0	303080	303080	0	9813600	0	2	2	2	4.3	4.3	4.3	116.17	0.00029665	5.0589	15457000	2	3.2	1.1	1	1	5	1	1	1	1	1	1
136	G5E965;C9J0F0;E9PFD3;A0A087X299;Q9H334-4;Q9H334-7;Q9H334;H0Y882;Q9H334-3;Q9H334-6;C9IYY1;A0A087X2G3;C9J5T4;Q9H334-2;A0A087WVT2	G5E965;C9J0F0;E9PFD3;A0A087X299;Q9H334-4;Q9H334-7;Q9H334;H0Y882;Q9H334-3;Q9H334-6	Forkhead box protein P1	FOXP1	tr|G5E965|G5E965_HUMAN Forkhead box P1, isoform CRA_f OS=Homo sapiens GN=FOXP1 PE=1 SV=1;tr|C9J0F0|C9J0F0_HUMAN Forkhead box protein P1 OS=Homo sapiens GN=FOXP1 PE=1 SV=1;tr|E9PFD3|E9PFD3_HUMAN Forkhead box protein P1 OS=Homo sapiens GN=FOXP1 PE=1 SV=1;tr|	28154000	21661000	2264300	1279700	984590	20072000	0	5	5	5	17	17	17	63.217	0	20.027	49815000	5	11.5	5.5	4	1	15	3	2	3	2	3	2
137	A0A087X2C5;Q9BV23;C9JNE7;C9J010	A0A087X2C5;Q9BV23;C9JNE7	Monoacylglycerol lipase ABHD6	ABHD6	tr|A0A087X2C5|A0A087X2C5_HUMAN Monoacylglycerol lipase ABHD6 OS=Homo sapiens GN=ABHD6 PE=4 SV=1;sp|Q9BV23|ABHD6_HUMAN Monoacylglycerol lipase ABHD6 OS=Homo sapiens GN=ABHD6 PE=2 SV=1;tr|C9JNE7|C9JNE7_HUMAN Monoacylglycerol lipase ABHD6 (Fragment) OS=Homo s	14431000	38366000	3105700	848870	2256800	28810000	29740000	3	3	3	12.6	12.6	12.6	35.803	0.00057504	4.4398	52797000	5	9.7	12.6	3	2	4	2	3	2	3	2	3
138	A0A087X2D5;Q9BRJ2;A0A087WU62	A0A087X2D5;Q9BRJ2;A0A087WU62	39S ribosomal protein L45, mitochondrial	MRPL45	tr|A0A087X2D5|A0A087X2D5_HUMAN 39S ribosomal protein L45, mitochondrial OS=Homo sapiens GN=MRPL45 PE=1 SV=1;sp|Q9BRJ2|RM45_HUMAN 39S ribosomal protein L45, mitochondrial OS=Homo sapiens GN=MRPL45 PE=1 SV=2;tr|A0A087WU62|A0A087WU62_HUMAN 39S ribosomal prote	1052600000	1165400000	100820000	47846000	52974000	1100500000	1400300000	13	13	13	56.5	56.5	56.5	35.29	0	110.39	2218000000	60	48.7	53.6	30	30	3	11	12	11	12	11	12
139	A0A087X2D8;O60271-9;O60271-4;O60271-2;O60271;H0YBE9;O60271-5;O60271-3	A0A087X2D8;O60271-9;O60271-4;O60271-2;O60271;H0YBE9;O60271-5;O60271-3	C-Jun-amino-terminal kinase-interacting protein 4	SPAG9	tr|A0A087X2D8|A0A087X2D8_HUMAN C-Jun-amino-terminal kinase-interacting protein 4 OS=Homo sapiens GN=SPAG9 PE=1 SV=1;sp|O60271-9|JIP4_HUMAN Isoform 6 of C-Jun-amino-terminal kinase-interacting protein 4 OS=Homo sapiens GN=SPAG9;sp|O60271-4|JIP4_HUMAN Isofor	0	0	0	0	0	0	0	2	2	2	2.3	2.3	2.3	145.17	0.00055081	3.7715	0	2	1.2	1.1	1	1	8	1	1	1	1	1	1
140	A0A087X2I1;P62333;H0YJC0;H0YJS8;H0YJX2;H0YJE9;H0YJT1	A0A087X2I1;P62333;H0YJC0	26S protease regulatory subunit 10B	PSMC6	tr|A0A087X2I1|A0A087X2I1_HUMAN 26S protease regulatory subunit 10B OS=Homo sapiens GN=PSMC6 PE=1 SV=1;sp|P62333|PRS10_HUMAN 26S protease regulatory subunit 10B OS=Homo sapiens GN=PSMC6 PE=1 SV=1;tr|H0YJC0|H0YJC0_HUMAN 26S protease regulatory subunit 10B (F	175190000	245230000	15015000	6256900	8758100	155440000	250930000	7	7	7	24.6	24.6	24.6	45.796	0	32.46	420420000	16	24.6	17.4	8	8	7	7	5	7	5	7	5
141	A0A096LNZ9;A0A096LPJ4;P05161	A0A096LNZ9;A0A096LPJ4;P05161	Ubiquitin-like protein ISG15	ISG15	tr|A0A096LNZ9|A0A096LNZ9_HUMAN Ubiquitin-like protein ISG15 (Fragment) OS=Homo sapiens GN=ISG15 PE=4 SV=1;tr|A0A096LPJ4|A0A096LPJ4_HUMAN Ubiquitin-like protein ISG15 OS=Homo sapiens GN=ISG15 PE=4 SV=1;sp|P05161|ISG15_HUMAN Ubiquitin-like protein ISG15 OS=H	121830000	6067700	11627000	11075000	551610	61132000	48930000	3	3	3	29.9	29.9	29.9	15.675	0	11.179	127900000	5	22.9	20.8	3	2	3	2	2	2	2	2	2
142	C9JFE4;A0A096LP07;A0A096LPJ3;A8K070;Q13098-5;Q13098;Q13098-7;Q13098-6;J3QS84;J3QS88;J3KTB0;J3QLE8;J3QLT0;J3QL53;J3KRE8;J3KSA5;J3KRJ4	C9JFE4;A0A096LP07;A0A096LPJ3;A8K070;Q13098-5;Q13098;Q13098-7;Q13098-6	COP9 signalosome complex subunit 1	GPS1	tr|C9JFE4|C9JFE4_HUMAN COP9 signalosome complex subunit 1 OS=Homo sapiens GN=GPS1 PE=1 SV=2;tr|A0A096LP07|A0A096LP07_HUMAN COP9 signalosome complex subunit 1 OS=Homo sapiens GN=GPS1 PE=4 SV=1;tr|A0A096LPJ3|A0A096LPJ3_HUMAN COP9 signalosome complex subunit	28606000	20597000	1892400	1100200	792180	39864000	11536000	3	3	3	7	7	7	53.371	0.0012736	2.8525	49203000	3	4.7	7	2	1	17	2	3	2	3	2	3
143	A0A096LP10;Q9NP73-2;A0A087WT15;A0A096LNJ4;A0A087WX43;A0A096LNL2;D6RE84;A0A087WTT9;Q9NP73	A0A096LP10;Q9NP73-2;A0A087WT15;A0A096LNJ4;A0A087WX43;A0A096LNL2;D6RE84;A0A087WTT9;Q9NP73	Putative bifunctional UDP-N-acetylglucosamine transferase and deubiquitinase ALG13	ALG13	tr|A0A096LP10|A0A096LP10_HUMAN Putative bifunctional UDP-N-acetylglucosamine transferase and deubiquitinase ALG13 (Fragment) OS=Homo sapiens GN=ALG13 PE=4 SV=1;sp|Q9NP73-2|ALG13_HUMAN Isoform 2 of Putative bifunctional UDP-N-acetylglucosamine transferase a	1932200000	7688600	161660000	161020000	640720	1710200000	0	2	2	2	16	16	16	17.801	0.0055636	2.2542	1939900000	3	4.3	11.7	2	1	9	1	1	1	1	1	1
144	A0A096LPI6;P30042;A0A096LNH5;H7C1F6;H7C2G3;P30042-2;A0A096LP73;F2Z2Q0;H7BYH1;A0A096LP12;A0A096LNJ1	A0A096LPI6;P30042;A0A096LNH5;H7C1F6;H7C2G3;P30042-2	ES1 protein homolog, mitochondrial	C21orf33	tr|A0A096LPI6|A0A096LPI6_HUMAN Uncharacterized protein OS=Homo sapiens PE=4 SV=1;sp|P30042|ES1_HUMAN ES1 protein homolog, mitochondrial OS=Homo sapiens GN=C21orf33 PE=1 SV=3;tr|A0A096LNH5|A0A096LNH5_HUMAN Protein LOC102724023 OS=Homo sapiens GN=LOC10272402	1371700000	1013100000	149050000	85732000	63319000	1264000000	963550000	12	11	11	64.3	58.8	58.8	25.64	0	139.99	2384800000	62	64.3	60.9	33	29	11	11	10	10	9	10	9
145	P98088;A0A096LPK4;Q9HC84	P98088;A0A096LPK4;Q9HC84	Mucin-5AC;Mucin-5B	MUC5AC;MUC5B	sp|P98088|MUC5A_HUMAN Mucin-5AC (Fragments) OS=Homo sapiens GN=MUC5AC PE=1 SV=3;tr|A0A096LPK4|A0A096LPK4_HUMAN Mucin-5AC OS=Homo sapiens GN=MUC5AC PE=4 SV=1;sp|Q9HC84|MUC5B_HUMAN Mucin-5B OS=Homo sapiens GN=MUC5B PE=1 SV=3	31953000	0	168170	168170	0	28547000	0	1	1	1	0.2	0.2	0.2	526.6	0.0084846	1.9738	31953000	1	0.2	0	1	0	3	1	0	1	0	1	0
146	A0AVT1-2;A0AVT1;H0Y8S8	A0AVT1-2;A0AVT1	Ubiquitin-like modifier-activating enzyme 6	UBA6	sp|A0AVT1-2|UBA6_HUMAN Isoform 2 of Ubiquitin-like modifier-activating enzyme 6 OS=Homo sapiens GN=UBA6;sp|A0AVT1|UBA6_HUMAN Ubiquitin-like modifier-activating enzyme 6 OS=Homo sapiens GN=UBA6 PE=1 SV=1	39040000	419100000	11454000	975990	10478000	245310000	192870000	4	4	4	9.3	9.3	9.3	65.756	0.00032468	7.2933	458140000	6	7.4	4.2	4	2	3	3	2	3	2	3	2
147	A0MZ66-2;A0MZ66-8;A0MZ66-4;A0MZ66-5;A0MZ66-6;A0MZ66;A0MZ66-3	A0MZ66-2;A0MZ66-8;A0MZ66-4;A0MZ66-5;A0MZ66-6;A0MZ66;A0MZ66-3	Shootin-1	KIAA1598	sp|A0MZ66-2|SHOT1_HUMAN Isoform 2 of Shootin-1 OS=Homo sapiens GN=KIAA1598;sp|A0MZ66-8|SHOT1_HUMAN Isoform 8 of Shootin-1 OS=Homo sapiens GN=KIAA1598;sp|A0MZ66-4|SHOT1_HUMAN Isoform 4 of Shootin-1 OS=Homo sapiens GN=KIAA1598;sp|A0MZ66-5|SHOT1_HUMAN Isoform	28538000	0	951260	951260	0	36039000	0	2	2	2	5.9	5.9	5.9	52.635	0.00056022	4.0531	28538000	2	5.9	0	2	0	7	2	0	2	0	2	0
148	H0YG77;A0PK00	H0YG77;A0PK00	Transmembrane protein 120B	TMEM120B	tr|H0YG77|H0YG77_HUMAN Transmembrane protein 120B (Fragment) OS=Homo sapiens GN=TMEM120B PE=4 SV=1;sp|A0PK00|T120B_HUMAN Transmembrane protein 120B OS=Homo sapiens GN=TMEM120B PE=2 SV=1	13110000	0	1092500	1092500	0	8323600	0	2	2	2	13.4	13.4	13.4	29.036	0.0005493	3.7443	13110000	1	13.4	0	1	0	2	2	0	2	0	2	0
149	A1L0T0;M0R026;E9PJS0;M0R1B5;M0QZX5;E9PL44;E9PNL1	A1L0T0;M0R026;E9PJS0	Acetolactate synthase-like protein	ILVBL	sp|A1L0T0|ILVBL_HUMAN Acetolactate synthase-like protein OS=Homo sapiens GN=ILVBL PE=1 SV=2;tr|M0R026|M0R026_HUMAN Acetolactate synthase-like protein OS=Homo sapiens GN=ILVBL PE=1 SV=1;tr|E9PJS0|E9PJS0_HUMAN Acetolactate synthase-like protein (Fragment) OS	1903600000	1879500000	126100000	63453000	62651000	1776300000	1730200000	23	23	23	53.6	53.6	53.6	67.867	0	199.31	3783100000	152	49.4	51.4	66	86	7	20	22	20	22	20	22
150	S4R350;A2A2G4;Q9Y672	S4R350;A2A2G4;Q9Y672	Dolichyl pyrophosphate Man9GlcNAc2 alpha-1,3-glucosyltransferase	ALG6	tr|S4R350|S4R350_HUMAN Dolichyl pyrophosphate Man9GlcNAc2 alpha-1,3-glucosyltransferase OS=Homo sapiens GN=ALG6 PE=4 SV=1;tr|A2A2G4|A2A2G4_HUMAN Dolichyl pyrophosphate Man9GlcNAc2 alpha-1,3-glucosyltransferase OS=Homo sapiens GN=ALG6 PE=4 SV=1;sp|Q9Y672|AL	70940000	29665000	7738900	5456900	2281900	34953000	40027000	2	2	2	7.5	7.5	7.5	32.235	0.00054645	3.6787	100610000	4	7.5	4.6	3	1	3	2	1	2	1	2	1
151	A2A2V1;P04156-2;P04156;X6RKS3	A2A2V1;P04156-2;P04156;X6RKS3	Major prion protein	PRNP	tr|A2A2V1|A2A2V1_HUMAN Major prion protein (Fragment) OS=Homo sapiens GN=PRNP PE=3 SV=1;sp|P04156-2|PRIO_HUMAN Isoform 2 of Major prion protein OS=Homo sapiens GN=PRNP;sp|P04156|PRIO_HUMAN Major prion protein OS=Homo sapiens GN=PRNP PE=1 SV=1;tr|X6RKS3|X6R	235100000	212870000	37331000	19592000	17739000	168130000	196270000	2	2	2	9.6	9.6	9.6	27.278	0	62.392	447970000	23	9.6	9.6	10	13	4	2	2	2	2	2	2
152	A2A2V2;P42696;P42696-2;Q5TCT4;H7C5M1	A2A2V2;P42696;P42696-2	RNA-binding protein 34	RBM34	tr|A2A2V2|A2A2V2_HUMAN RNA-binding protein 34 (Fragment) OS=Homo sapiens GN=RBM34 PE=1 SV=1;sp|P42696|RBM34_HUMAN RNA-binding protein 34 OS=Homo sapiens GN=RBM34 PE=1 SV=2;sp|P42696-2|RBM34_HUMAN Isoform 2 of RNA-binding protein 34 OS=Homo sapiens GN=RBM34	258450000	129920000	12946000	8615100	4330800	165290000	207700000	8	8	8	29.9	29.9	29.9	45.917	0	34.097	388380000	23	29.9	10.5	13	10	5	8	3	8	3	8	3
153	A2AB90;O15533-2;O15533;O15533-3;Q6P1N7;C9JA35;O15533-4	A2AB90;O15533-2;O15533;O15533-3;Q6P1N7;C9JA35;O15533-4	Tapasin	TAPBP	tr|A2AB90|A2AB90_HUMAN Tapasin OS=Homo sapiens GN=TAPBP PE=1 SV=1;sp|O15533-2|TPSN_HUMAN Isoform 2 of Tapasin OS=Homo sapiens GN=TAPBP;sp|O15533|TPSN_HUMAN Tapasin OS=Homo sapiens GN=TAPBP PE=1 SV=1;sp|O15533-3|TPSN_HUMAN Isoform 3 of Tapasin OS=Homo sapie	387270000	325860000	50938000	27662000	23276000	409470000	385070000	4	4	4	12.7	12.7	12.7	49.491	0	31.15	713140000	27	10.7	12.7	13	14	7	3	4	3	4	3	4
154	A2IDA3;P29372-5;P29372-4;P29372-2;P29372	A2IDA3;P29372-5;P29372-4;P29372-2;P29372	DNA-3-methyladenine glycosylase	MPG	tr|A2IDA3|A2IDA3_HUMAN DNA-3-methyladenine glycosylase (Fragment) OS=Homo sapiens GN=MPG PE=1 SV=1;sp|P29372-5|3MG_HUMAN Isoform 4 of DNA-3-methyladenine glycosylase OS=Homo sapiens GN=MPG;sp|P29372-4|3MG_HUMAN Isoform 3 of DNA-3-methyladenine glycosylase	96355000	79707000	13543000	7411900	6131300	87926000	114170000	3	3	3	16.7	16.7	16.7	27.295	0	29.31	176060000	11	16.7	16.7	6	5	5	3	3	3	3	3	3
155	A2RRP1;A2RRP1-2;H0Y5G7;H7C007;H7BZU5;C9JCM7;H7BZR3;H7C1U4	A2RRP1;A2RRP1-2;H0Y5G7	Neuroblastoma-amplified sequence	NBAS	sp|A2RRP1|NBAS_HUMAN Neuroblastoma-amplified sequence OS=Homo sapiens GN=NBAS PE=1 SV=2;sp|A2RRP1-2|NBAS_HUMAN Isoform 2 of Neuroblastoma-amplified sequence OS=Homo sapiens GN=NBAS;tr|H0Y5G7|H0Y5G7_HUMAN Neuroblastoma-amplified sequence (Fragment) OS=Homo	813690000	355070000	8854200	6164300	2689900	609640000	435340000	38	38	38	22.1	22.1	22.1	268.57	0	143.72	1168800000	77	19.1	9.7	49	28	8	32	18	32	18	32	18
156	F8WA11;Q7Z460-2;Q7Z460-4;A2RU21;Q7Z460-3;Q7Z460;H0Y5T1;J3KR49;O75122;C9J151	F8WA11;Q7Z460-2;Q7Z460-4;A2RU21;Q7Z460-3;Q7Z460;H0Y5T1;J3KR49;O75122	CLIP-associating protein 1;CLIP-associating protein 2	CLASP1;CLASP2	tr|F8WA11|F8WA11_HUMAN CLIP-associating protein 1 OS=Homo sapiens GN=CLASP1 PE=1 SV=2;sp|Q7Z460-2|CLAP1_HUMAN Isoform 2 of CLIP-associating protein 1 OS=Homo sapiens GN=CLASP1;sp|Q7Z460-4|CLAP1_HUMAN Isoform 4 of CLIP-associating protein 1 OS=Homo sapiens	46422000	27196000	736180	464220	271960	28215000	34936000	4	4	2	3.9	3.9	1.9	162.76	0	9.4072	73618000	8	3.2	2.7	5	3	10	3	3	3	3	1	1
157	A2RU67	A2RU67	Uncharacterized protein KIAA1467	KIAA1467	sp|A2RU67|K1467_HUMAN Uncharacterized protein KIAA1467 OS=Homo sapiens GN=KIAA1467 PE=1 SV=1	9935200	0	342590	342590	0	8876100	0	1	1	1	2.7	2.7	2.7	67.038	0.0015023	2.6998	9935200	1	2.7	0	1	0	1	1	0	1	0	1	0
158	A3KMH1-3;A3KMH1;A3KMH1-2	A3KMH1-3;A3KMH1;A3KMH1-2	von Willebrand factor A domain-containing protein 8	VWA8	sp|A3KMH1-3|VWA8_HUMAN Isoform 3 of von Willebrand factor A domain-containing protein 8 OS=Homo sapiens GN=VWA8;sp|A3KMH1|VWA8_HUMAN von Willebrand factor A domain-containing protein 8 OS=Homo sapiens GN=VWA8 PE=1 SV=2;sp|A3KMH1-2|VWA8_HUMAN Isoform 2 of v	1250800000	725470000	15810000	10007000	5803800	1097900000	892040000	40	40	40	29.5	29.5	29.5	210.92	0	182.07	1976300000	94	26.9	20.1	55	39	3	37	27	37	27	37	27
159	A4D1E9;A4D1E9-2;C9J8R7;C9JNI1;C9JEQ8;F8WBY0;F8WCN4;F8WBB5;A4D1E9-3	A4D1E9;A4D1E9-2;C9J8R7;C9JNI1	GTP-binding protein 10	GTPBP10	sp|A4D1E9|GTPBA_HUMAN GTP-binding protein 10 OS=Homo sapiens GN=GTPBP10 PE=1 SV=1;sp|A4D1E9-2|GTPBA_HUMAN Isoform 2 of GTP-binding protein 10 OS=Homo sapiens GN=GTPBP10;tr|C9J8R7|C9J8R7_HUMAN GTP-binding protein 10 (Fragment) OS=Homo sapiens GN=GTPBP10 PE=	235490000	275610000	17624000	8120400	9503900	259030000	346650000	11	11	11	36.7	36.7	36.7	42.932	0	34.281	511110000	39	27.1	25.8	19	20	9	8	8	8	8	8	8
160	Q5TGE2;A5PLL7-2;A5PLL7	Q5TGE2;A5PLL7-2;A5PLL7	Transmembrane protein 189	TMEM189	tr|Q5TGE2|Q5TGE2_HUMAN HCG2044780, isoform CRA_b OS=Homo sapiens GN=TMEM189 PE=1 SV=1;sp|A5PLL7-2|TM189_HUMAN Isoform 2 of Transmembrane protein 189 OS=Homo sapiens GN=TMEM189;sp|A5PLL7|TM189_HUMAN Transmembrane protein 189 OS=Homo sapiens GN=TMEM189 PE=1	57429000	36704000	15689000	9571500	6117400	58809000	35212000	1	1	1	7.7	7.7	7.7	22.883	0.0027187	2.5432	94133000	5	7.7	7.7	3	2	3	1	1	1	1	1	1
161	A5YKK6-3;A5YKK6-2;A5YKK6;B5MDN3;A5YKK6-4	A5YKK6-3;A5YKK6-2;A5YKK6;B5MDN3;A5YKK6-4	CCR4-NOT transcription complex subunit 1	CNOT1	sp|A5YKK6-3|CNOT1_HUMAN Isoform 3 of CCR4-NOT transcription complex subunit 1 OS=Homo sapiens GN=CNOT1;sp|A5YKK6-2|CNOT1_HUMAN Isoform 2 of CCR4-NOT transcription complex subunit 1 OS=Homo sapiens GN=CNOT1;sp|A5YKK6|CNOT1_HUMAN CCR4-NOT transcription compl	0	4264200	34668	0	34668	0	6853100	2	2	2	0.9	0.9	0.9	241.26	0.0005629	4.1168	4264200	6	0.5	0.9	2	4	5	1	2	1	2	1	2
162	A6NCS6	A6NCS6	Uncharacterized protein C2orf72	C2orf72	sp|A6NCS6|CB072_HUMAN Uncharacterized protein C2orf72 OS=Homo sapiens GN=C2orf72 PE=2 SV=2	673770000	626120000	81243000	42110000	39132000	665790000	575230000	9	9	9	48.5	48.5	48.5	30.48	0	111.04	1299900000	63	47.5	42.7	33	30	1	8	8	8	8	8	8
163	A6ND22;Q9Y3D3-2;Q9Y3D3	A6ND22;Q9Y3D3-2;Q9Y3D3	28S ribosomal protein S16, mitochondrial	MRPS16	tr|A6ND22|A6ND22_HUMAN 28S ribosomal protein S16, mitochondrial OS=Homo sapiens GN=MRPS16 PE=1 SV=1;sp|Q9Y3D3-2|RT16_HUMAN Isoform 2 of 28S ribosomal protein S16, mitochondrial OS=Homo sapiens GN=MRPS16;sp|Q9Y3D3|RT16_HUMAN 28S ribosomal protein S16, mitoc	177390000	200580000	53996000	25341000	28655000	178770000	204980000	3	3	3	39.4	39.4	39.4	11.15	0.00032765	7.5403	377970000	6	26.3	39.4	2	4	3	2	3	2	3	2	3
164	A6NDY5;Q6P5W5-2;Q6P5W5	A6NDY5;Q6P5W5-2;Q6P5W5	Zinc transporter ZIP4	SLC39A4	tr|A6NDY5|A6NDY5_HUMAN Zinc transporter ZIP4 OS=Homo sapiens GN=SLC39A4 PE=4 SV=3;sp|Q6P5W5-2|S39A4_HUMAN Isoform 2 of Zinc transporter ZIP4 OS=Homo sapiens GN=SLC39A4;sp|Q6P5W5|S39A4_HUMAN Zinc transporter ZIP4 OS=Homo sapiens GN=SLC39A4 PE=1 SV=3	194720000	143200000	21120000	12170000	8949800	166710000	173110000	2	2	2	4.7	4.7	4.7	66.177	0.00030003	5.3246	337920000	5	4.7	4.7	2	3	3	2	2	2	2	2	2
165	A6NEM2;P51610-2;P51610;P51610-4;H7C1C4;P51610-3;Q9Y5Z7	A6NEM2;P51610-2;P51610;P51610-4;H7C1C4	Host cell factor 1;HCF N-terminal chain 1;HCF N-terminal chain 2;HCF N-terminal chain 3;HCF N-terminal chain 4;HCF N-terminal chain 5;HCF N-terminal chain 6;HCF C-terminal chain 1;HCF C-terminal chain 2;HCF C-terminal chain 3;HCF C-terminal chain 4;HCF C-terminal chain 5;HCF C-terminal chain 6	HCFC1	tr|A6NEM2|A6NEM2_HUMAN HCF N-terminal chain 5 OS=Homo sapiens GN=HCFC1 PE=1 SV=2;sp|P51610-2|HCFC1_HUMAN Isoform 2 of Host cell factor 1 OS=Homo sapiens GN=HCFC1;sp|P51610|HCFC1_HUMAN Host cell factor 1 OS=Homo sapiens GN=HCFC1 PE=1 SV=2;sp|P51610-4|HCFC1_	123400000	151310000	3231900	1451800	1780200	102480000	177200000	13	13	13	9.8	9.8	9.8	213.47	0	73.782	274720000	25	6.2	5	12	13	7	7	8	7	8	7	8
166	A6NFX8;Q9UKK9;A6NJU6;H0YEY4;A6NCQ0	A6NFX8;Q9UKK9;A6NJU6;H0YEY4;A6NCQ0	ADP-sugar pyrophosphatase	NUDT5	tr|A6NFX8|A6NFX8_HUMAN ADP-sugar pyrophosphatase OS=Homo sapiens GN=NUDT5 PE=1 SV=1;sp|Q9UKK9|NUDT5_HUMAN ADP-sugar pyrophosphatase OS=Homo sapiens GN=NUDT5 PE=1 SV=1;tr|A6NJU6|A6NJU6_HUMAN ADP-sugar pyrophosphatase OS=Homo sapiens GN=NUDT5 PE=1 SV=2;tr|H0	96181000	75628000	12272000	6870100	5402000	100340000	99743000	6	6	6	38.4	38.4	38.4	25.895	0	11.944	171810000	14	30.2	18.5	8	6	5	4	4	4	4	4	4
167	A6NGW1;O95070;E9PIZ0;C9JST7;E9PS11	A6NGW1;O95070;E9PIZ0;C9JST7	Protein YIF1A	YIF1A	tr|A6NGW1|A6NGW1_HUMAN Protein YIF1A OS=Homo sapiens GN=YIF1A PE=1 SV=1;sp|O95070|YIF1A_HUMAN Protein YIF1A OS=Homo sapiens GN=YIF1A PE=1 SV=2;tr|E9PIZ0|E9PIZ0_HUMAN Protein YIF1A (Fragment) OS=Homo sapiens GN=YIF1A PE=1 SV=1;tr|C9JST7|C9JST7_HUMAN Protein	114390000	60545000	21867000	14299000	7568100	79858000	0	4	4	4	24.1	24.1	24.1	26.377	0	28.666	174940000	12	19.1	16.2	7	5	5	3	3	3	3	3	3
168	A6NGW2;Q7RTU9	A6NGW2;Q7RTU9	Putative stereocilin-like protein;Stereocilin	STRCP1;STRC	sp|A6NGW2|STRCL_HUMAN Putative stereocilin-like protein OS=Homo sapiens GN=STRCP1 PE=5 SV=1;sp|Q7RTU9|STRC_HUMAN Stereocilin OS=Homo sapiens GN=STRC PE=2 SV=1	113710000	7866500	1899700	1776800	122910	63970000	17279000	1	1	1	0.7	0.7	0.7	192.43	0.0093985	1.9509	121580000	3	0.7	0.7	2	1	2	1	1	1	1	1	1
169	A6NH11	A6NH11	Glycolipid transfer protein domain-containing protein 2	GLTPD2	sp|A6NH11|GLTD2_HUMAN Glycolipid transfer protein domain-containing protein 2 OS=Homo sapiens GN=GLTPD2 PE=1 SV=2	14211000	0	676730	676730	0	11820000	0	2	2	2	8.2	8.2	8.2	31.641	0.00055525	3.915	14211000	5	8.2	3.1	4	1	1	2	1	2	1	2	1
170	A6NHB5;Q14202-2;Q14202;A6NHN7;A6NL54;Q14202-3	A6NHB5;Q14202-2;Q14202;A6NHN7	Zinc finger MYM-type protein 3	ZMYM3	tr|A6NHB5|A6NHB5_HUMAN Zinc finger MYM-type protein 3 OS=Homo sapiens GN=ZMYM3 PE=1 SV=1;sp|Q14202-2|ZMYM3_HUMAN Isoform 2 of Zinc finger MYM-type protein 3 OS=Homo sapiens GN=ZMYM3;sp|Q14202|ZMYM3_HUMAN Zinc finger MYM-type protein 3 OS=Homo sapiens GN=ZM	88490000	78019000	2312600	1229000	1083600	87958000	92607000	9	9	9	9.8	9.8	9.8	152.6	0	26.187	166510000	24	6.7	8.7	10	14	6	6	8	6	8	6	8
171	A6NHL2-2;A6NHL2	A6NHL2-2;A6NHL2	Tubulin alpha chain-like 3	TUBAL3	sp|A6NHL2-2|TBAL3_HUMAN Isoform 2 of Tubulin alpha chain-like 3 OS=Homo sapiens GN=TUBAL3;sp|A6NHL2|TBAL3_HUMAN Tubulin alpha chain-like 3 OS=Homo sapiens GN=TUBAL3 PE=1 SV=2	7867300	19040000	996550	291380	705170	13277000	21428000	4	1	1	9.1	4.2	4.2	45.517	0.00032196	7.0357	26907000	2	9.1	9.1	1	1	2	4	4	1	1	1	1
172	A6NHQ2;R4GMW7	A6NHQ2;R4GMW7	rRNA/tRNA 2-O-methyltransferase fibrillarin-like protein 1	FBLL1	sp|A6NHQ2|FBLL1_HUMAN rRNA/tRNA 2-O-methyltransferase fibrillarin-like protein 1 OS=Homo sapiens GN=FBLL1 PE=3 SV=1;tr|R4GMW7|R4GMW7_HUMAN rRNA/tRNA 2-O-methyltransferase fibrillarin-like protein 1 OS=Homo sapiens GN=FBLL1 PE=1 SV=1	1104100000	1057300000	90060000	46005000	44055000	724360000	912990000	4	2	2	11.4	3.6	3.6	34.675	0	20.871	2161400000	22	11.4	11.1	12	10	2	4	3	2	1	2	1
173	A6NHR9-2;A6NHR9;J3KTL8;A6NHR9-3;J3KRK8;J3QSH1	A6NHR9-2;A6NHR9;J3KTL8;A6NHR9-3	Structural maintenance of chromosomes flexible hinge domain-containing protein 1	SMCHD1	sp|A6NHR9-2|SMHD1_HUMAN Isoform 2 of Structural maintenance of chromosomes flexible hinge domain-containing protein 1 OS=Homo sapiens GN=SMCHD1;sp|A6NHR9|SMHD1_HUMAN Structural maintenance of chromosomes flexible hinge domain-containing protein 1 OS=Homo s	330220000	310500000	5295200	2729100	2566100	389120000	281480000	24	24	24	16.4	16.4	16.4	215.74	0	44.053	640720000	38	13.9	7.9	26	12	6	21	11	21	11	21	11
174	A6NHV6;B4DZM6;Q99640-4;Q99640-2;Q99640-3;Q99640	A6NHV6;B4DZM6;Q99640-4;Q99640-2;Q99640-3;Q99640	Membrane-associated tyrosine- and threonine-specific cdc2-inhibitory kinase	PKMYT1	tr|A6NHV6|A6NHV6_HUMAN Membrane-associated tyrosine- and threonine-specific cdc2-inhibitory kinase OS=Homo sapiens GN=PKMYT1 PE=1 SV=3;tr|B4DZM6|B4DZM6_HUMAN Membrane-associated tyrosine- and threonine-specific cdc2-inhibitory kinase OS=Homo sapiens GN=PKM	0	18026000	948710	0	948710	0	22401000	2	2	2	6.7	6.7	6.7	48.891	0.00030012	5.3275	18026000	1	0	6.7	0	1	6	0	2	0	2	0	2
175	A6NJ78;A6NJ78-2;P0C7V9;A6NJ78-4;B5MC64;F8WD83;A6NJ78-3	A6NJ78;A6NJ78-2;P0C7V9;A6NJ78-4	Probable methyltransferase-like protein 15;Putative methyltransferase-like protein 15P1	METTL15;METTL15P1	sp|A6NJ78|MET15_HUMAN Probable methyltransferase-like protein 15 OS=Homo sapiens GN=METTL15 PE=2 SV=1;sp|A6NJ78-2|MET15_HUMAN Isoform 2 of Probable methyltransferase-like protein 15 OS=Homo sapiens GN=METTL15;sp|P0C7V9|ME15P_HUMAN Putative methyltransferas	112180000	99330000	8134900	4314500	3820400	129380000	118650000	6	6	6	25.8	25.8	25.8	46.121	0	16.4	211510000	12	18.7	18.9	6	6	7	4	5	4	5	4	5
176	A6NJA2;P54578-2;B7Z4N8;P54578	A6NJA2;P54578-2;B7Z4N8;P54578	Ubiquitin carboxyl-terminal hydrolase;Ubiquitin carboxyl-terminal hydrolase 14	USP14	tr|A6NJA2|A6NJA2_HUMAN Ubiquitin carboxyl-terminal hydrolase OS=Homo sapiens GN=USP14 PE=1 SV=2;sp|P54578-2|UBP14_HUMAN Isoform 2 of Ubiquitin carboxyl-terminal hydrolase 14 OS=Homo sapiens GN=USP14;tr|B7Z4N8|B7Z4N8_HUMAN Ubiquitin carboxyl-terminal hydrol	92444000	80025000	5947200	3187700	2759500	81971000	70026000	6	6	6	19.4	19.4	19.4	51.086	0	15.541	172470000	11	19.4	11.4	8	3	4	6	3	6	3	6	3
177	A6NJD9;A8MVT4;A8MYK1;Q16540;H7C2P7	A6NJD9;A8MVT4;A8MYK1;Q16540;H7C2P7	39S ribosomal protein L23, mitochondrial	MRPL23	tr|A6NJD9|A6NJD9_HUMAN 39S ribosomal protein L23, mitochondrial OS=Homo sapiens GN=MRPL23 PE=1 SV=1;tr|A8MVT4|A8MVT4_HUMAN 39S ribosomal protein L23, mitochondrial OS=Homo sapiens GN=MRPL23 PE=1 SV=1;tr|A8MYK1|A8MYK1_HUMAN 39S ribosomal protein L23, mitoch	511320000	346520000	65988000	39333000	26656000	601520000	455310000	5	5	5	27.6	27.6	27.6	18.529	0	94.302	857850000	23	27.6	27.6	13	10	5	3	5	3	5	3	5
178	A6NKB8;Q9H4A4;A0A087WUS4;A0A087WU27;C9JMZ3	A6NKB8;Q9H4A4;A0A087WUS4;A0A087WU27	Aminopeptidase B	RNPEP	tr|A6NKB8|A6NKB8_HUMAN Aminopeptidase B OS=Homo sapiens GN=RNPEP PE=1 SV=1;sp|Q9H4A4|AMPB_HUMAN Aminopeptidase B OS=Homo sapiens GN=RNPEP PE=1 SV=2;tr|A0A087WUS4|A0A087WUS4_HUMAN Aminopeptidase B (Fragment) OS=Homo sapiens GN=RNPEP PE=1 SV=1;tr|A0A087WU27|	68192000	0	2199700	2199700	0	62198000	0	4	4	4	13.7	13.7	13.7	68.168	0	12.424	68192000	5	13.7	0	5	0	5	4	0	4	0	4	0
179	A6NKF9;B7ZAQ6-2;B7ZAQ6-3;P0CG08;B7ZAQ6;A0A087WW78;A0A087WW82;U3KPV2;E9PKY3	A6NKF9;B7ZAQ6-2;B7ZAQ6-3;P0CG08;B7ZAQ6	Putative Golgi pH regulator C;Golgi pH regulator A;Golgi pH regulator B	GPR89C;GPR89A;GPR89B	sp|A6NKF9|GPHRC_HUMAN Putative Golgi pH regulator C OS=Homo sapiens GN=GPR89C PE=5 SV=2;sp|B7ZAQ6-2|GPHRA_HUMAN Isoform 2 of Golgi pH regulator A OS=Homo sapiens GN=GPR89A;sp|B7ZAQ6-3|GPHRA_HUMAN Isoform 3 of Golgi pH regulator A OS=Homo sapiens GN=GPR89A;	45516000	38972000	4446700	2395600	2051200	59592000	29233000	3	3	3	15.9	15.9	15.9	36.67	0	15.532	84488000	7	12.5	11.9	4	3	9	2	2	2	2	2	2
180	J3KNE0;A6NKT7;Q7Z3J3	J3KNE0;A6NKT7;Q7Z3J3	RanBP2-like and GRIP domain-containing protein 3;RanBP2-like and GRIP domain-containing protein 4	RGPD3;RGPD4	tr|J3KNE0|J3KNE0_HUMAN RanBP2-like and GRIP domain-containing protein 3 OS=Homo sapiens GN=RGPD3 PE=4 SV=2;sp|A6NKT7|RGPD3_HUMAN RanBP2-like and GRIP domain-containing protein 3 OS=Homo sapiens GN=RGPD3 PE=2 SV=2;sp|Q7Z3J3|RGPD4_HUMAN RanBP2-like and GRIP	29571000	37704000	579960	254920	325030	29571000	36171000	14	1	1	10.4	0.7	0.7	197.62	0.00055279	3.8406	67275000	5	9.2	6.3	2	3	3	13	8	1	1	1	1
181	A6NLH6;Q9P003	A6NLH6;Q9P003	Protein cornichon homolog 4	CNIH4	tr|A6NLH6|A6NLH6_HUMAN Protein cornichon homolog 4 OS=Homo sapiens GN=CNIH4 PE=1 SV=1;sp|Q9P003|CNIH4_HUMAN Protein cornichon homolog 4 OS=Homo sapiens GN=CNIH4 PE=1 SV=1	236910000	239150000	238030000	118460000	119570000	300940000	267550000	1	1	1	14.6	14.6	14.6	15.771	0	14.808	476060000	11	14.6	14.6	6	5	2	1	1	1	1	1	1
182	A6NN50;O75147-2;O75147-1;O75147-4;O75147	A6NN50;O75147-2;O75147-1;O75147-4;O75147	Obscurin-like protein 1	OBSL1	tr|A6NN50|A6NN50_HUMAN Obscurin-like protein 1 OS=Homo sapiens GN=OBSL1 PE=1 SV=1;sp|O75147-2|OBSL1_HUMAN Isoform 2 of Obscurin-like protein 1 OS=Homo sapiens GN=OBSL1;sp|O75147-1|OBSL1_HUMAN Isoform 3 of Obscurin-like protein 1 OS=Homo sapiens GN=OBSL1;sp	0	0	0	0	0	0	0	2	2	2	1.5	1.5	1.5	197.1	0.0010336	2.9933	0	3	1.5	0.8	2	1	5	2	1	2	1	2	1
183	A6NNI4;G8JLH6;P21926	A6NNI4;G8JLH6;P21926	Tetraspanin;CD9 antigen	CD9	tr|A6NNI4|A6NNI4_HUMAN Tetraspanin OS=Homo sapiens GN=CD9 PE=1 SV=1;tr|G8JLH6|G8JLH6_HUMAN Tetraspanin (Fragment) OS=Homo sapiens GN=CD9 PE=1 SV=1;sp|P21926|CD9_HUMAN CD9 antigen OS=Homo sapiens GN=CD9 PE=1 SV=4	28845000	18481000	7887800	4807600	3080200	28981000	17440000	1	1	1	6.3	6.3	6.3	17.764	0.00056196	4.0925	47327000	3	6.3	6.3	2	1	3	1	1	1	1	1	1
184	A6NNK5;Q12888;Q12888-3;Q12888-2;H7BZY0;H7C3N7	A6NNK5;Q12888;Q12888-3;Q12888-2	Tumor suppressor p53-binding protein 1	TP53BP1	tr|A6NNK5|A6NNK5_HUMAN Tumor suppressor p53-binding protein 1 OS=Homo sapiens GN=TP53BP1 PE=1 SV=2;sp|Q12888|TP53B_HUMAN Tumor suppressor p53-binding protein 1 OS=Homo sapiens GN=TP53BP1 PE=1 SV=2;sp|Q12888-3|TP53B_HUMAN Isoform 3 of Tumor suppressor p53-b	46122000	8954800	556340	465880	90452	30602000	29073000	3	3	3	2.8	2.8	2.8	209.02	0	11.288	55077000	5	2.8	1.1	4	1	6	3	1	3	1	3	1
185	F6WIT2;A6PVN5;Q15257-3;Q15257-2;Q15257;A6PVN8;C9IZ76;A6PVN6;Q5T949;Q5T948;A6PVN9;B7ZBQ0;A6PVN7;Q68CR8;Q15257-4	F6WIT2;A6PVN5;Q15257-3;Q15257-2;Q15257;A6PVN8;C9IZ76;A6PVN6;Q5T949;Q5T948;A6PVN9	Serine/threonine-protein phosphatase 2A activator	PPP2R4	tr|F6WIT2|F6WIT2_HUMAN Serine/threonine-protein phosphatase 2A activator OS=Homo sapiens GN=PPP2R4 PE=1 SV=1;tr|A6PVN5|A6PVN5_HUMAN Serine/threonine-protein phosphatase 2A activator OS=Homo sapiens GN=PPP2R4 PE=1 SV=1;sp|Q15257-3|PTPA_HUMAN Isoform 3 of Se	0	14864000	825780	0	825780	0	18747000	3	3	3	18.1	18.1	18.1	32.936	0.00055006	3.7623	14864000	4	4.5	13.5	1	3	15	1	2	1	2	1	2
186	F5GYY1;F5GXL6;F5GXJ8;F6WZM0;F5H235;C9K0E8;B4DMS8;Q96FC9-5;Q96FC9-4;Q96FC9-3;Q96FC9-2;A8MPP1;Q92771;Q96FC9	F5GYY1;F5GXL6;F5GXJ8;F6WZM0;F5H235;C9K0E8;B4DMS8;Q96FC9-5;Q96FC9-4;Q96FC9-3;Q96FC9-2;A8MPP1;Q92771;Q96FC9	Probable ATP-dependent RNA helicase DDX11;Putative ATP-dependent RNA helicase DDX11-like protein 8;Putative ATP-dependent RNA helicase DDX12	DDX11;DDX11L8;DDX12P	tr|F5GYY1|F5GYY1_HUMAN Probable ATP-dependent RNA helicase DDX11 OS=Homo sapiens GN=DDX11 PE=4 SV=1;tr|F5GXL6|F5GXL6_HUMAN Probable ATP-dependent RNA helicase DDX11 (Fragment) OS=Homo sapiens GN=DDX11 PE=4 SV=3;tr|F5GXJ8|F5GXJ8_HUMAN Probable ATP-dependent	2635100000	2812600000	544770000	263510000	281260000	1757400000	3167200000	1	1	1	7	7	7	19.492	0.0078534	2.0507	5447700000	11	7	7	7	4	14	1	1	1	1	1	1
187	R9WNI0;A8MQB8;G3V0J0;Q06787-8;Q06787-6;Q06787-2;Q06787-4;Q06787-5;Q06787-9;Q06787-7;Q06787-3;Q06787;A0A087WXI3;G8JLE9;A0A087WWR6;Q8IXW7;A0A087WY29	R9WNI0;A8MQB8;G3V0J0;Q06787-8;Q06787-6;Q06787-2;Q06787-4;Q06787-5;Q06787-9;Q06787-7;Q06787-3;Q06787;A0A087WXI3;G8JLE9	Fragile X mental retardation protein 1	FMR1	tr|R9WNI0|R9WNI0_HUMAN Fragile X mental retardation 1 OS=Homo sapiens GN=FMR1 PE=1 SV=1;tr|A8MQB8|A8MQB8_HUMAN Fragile X mental retardation protein 1 OS=Homo sapiens GN=FMR1 PE=1 SV=1;tr|G3V0J0|G3V0J0_HUMAN Fragile X mental retardation 1, isoform CRA_e OS=	56848000	58592000	3498200	1722700	1775500	60932000	61117000	5	4	3	11.2	9.7	6.2	61.515	0	8.309	115440000	4	7.2	6.2	1	3	17	3	3	2	3	1	3
188	J3QLE5;A8MT02;P14678-2;P63162;P14678;P63162-2;P14678-3;J3KRY3;S4R3P3	J3QLE5;A8MT02;P14678-2;P63162;P14678;P63162-2;P14678-3;J3KRY3;S4R3P3	Small nuclear ribonucleoprotein-associated proteins B and B;Small nuclear ribonucleoprotein-associated protein N	SNRPN;SNRPB	tr|J3QLE5|J3QLE5_HUMAN Small nuclear ribonucleoprotein-associated protein N (Fragment) OS=Homo sapiens GN=SNRPN PE=4 SV=1;tr|A8MT02|A8MT02_HUMAN Small nuclear ribonucleoprotein-associated proteins B and B OS=Homo sapiens GN=SNRPB PE=1 SV=3;sp|P14678-2|RSM	1847500000	1217900000	278670000	167950000	110720000	1191400000	1336600000	7	7	7	34.3	34.3	34.3	17.546	0	40.63	3065400000	93	34.3	34.3	53	40	9	7	6	7	6	7	6
189	A8MUA9;A8MU27;P61956-2;Q6EEV6;P61956;P55854;P55854-2	A8MUA9;A8MU27;P61956-2;Q6EEV6;P61956;P55854;P55854-2	Small ubiquitin-related modifier 2;Small ubiquitin-related modifier 4;Small ubiquitin-related modifier 3	SUMO3;SUMO2;SUMO4	tr|A8MUA9|A8MUA9_HUMAN SMT3 suppressor of mif two 3 homolog 3 (Yeast), isoform CRA_d OS=Homo sapiens GN=SUMO3 PE=1 SV=1;tr|A8MU27|A8MU27_HUMAN Small ubiquitin-related modifier 3 OS=Homo sapiens GN=SUMO3 PE=1 SV=1;sp|P61956-2|SUMO2_HUMAN Isoform 2 of Small	101820000	97384000	19920000	10182000	9738400	64706000	128720000	1	1	1	8.9	8.9	8.9	15.317	0.00032755	7.5401	199200000	4	8.9	8.9	1	3	7	1	1	1	1	1	1
190	H7BY10;K7EJV9;K7ERT8;A8MUS3;P62750;K7EMA7	H7BY10;K7EJV9;K7ERT8;A8MUS3;P62750;K7EMA7	60S ribosomal protein L23a	RPL23A	tr|H7BY10|H7BY10_HUMAN 60S ribosomal protein L23a (Fragment) OS=Homo sapiens GN=RPL23A PE=1 SV=1;tr|K7EJV9|K7EJV9_HUMAN 60S ribosomal protein L23a (Fragment) OS=Homo sapiens GN=RPL23A PE=1 SV=1;tr|K7ERT8|K7ERT8_HUMAN 60S ribosomal protein L23a (Fragment) O	2818700000	2465400000	587130000	313190000	273940000	1992500000	2559700000	9	9	9	46.2	46.2	46.2	17.692	0	78.107	5284200000	78	36.7	46.2	36	42	6	8	9	8	9	8	9
191	E9PN41;A8MVV6;J3KQ42;O14817;E9PSH3;E9PPX8;J3KNL1	E9PN41;A8MVV6;J3KQ42;O14817;E9PSH3;E9PPX8;J3KNL1	Tetraspanin;Tetraspanin-4	TSPAN4	tr|E9PN41|E9PN41_HUMAN Tetraspanin-4 (Fragment) OS=Homo sapiens GN=TSPAN4 PE=4 SV=1;tr|A8MVV6|A8MVV6_HUMAN Tetraspanin OS=Homo sapiens GN=TSPAN4 PE=3 SV=1;tr|J3KQ42|J3KQ42_HUMAN Tetraspanin OS=Homo sapiens GN=TSPAN4 PE=3 SV=1;sp|O14817|TSN4_HUMAN Tetraspan	132690000	23888000	26096000	22114000	3981300	61463000	49233000	2	2	2	36.4	36.4	36.4	15.195	0	53.557	156570000	8	36.4	17.4	6	2	7	2	1	2	1	2	1
192	Q49AN9;F5H013;P62308;A8MWD9;C9JVQ0	Q49AN9;F5H013;P62308;A8MWD9	Small nuclear ribonucleoprotein G;Putative small nuclear ribonucleoprotein G-like protein 15	SNRPG;SNRPGP15	tr|Q49AN9|Q49AN9_HUMAN SNRPG protein OS=Homo sapiens GN=SNRPG PE=2 SV=1;tr|F5H013|F5H013_HUMAN Small nuclear ribonucleoprotein G OS=Homo sapiens GN=SNRPG PE=4 SV=1;sp|P62308|RUXG_HUMAN Small nuclear ribonucleoprotein G OS=Homo sapiens GN=SNRPG PE=1 SV=1;sp	484280000	370520000	427400000	242140000	185260000	461270000	385000000	3	3	3	31.2	31.2	31.2	7.1013	0	15.258	854800000	28	31.2	29.7	15	13	5	3	2	3	2	3	2
193	C9JA41;H7C2N5;A8MWY0-2;A8MWY0-3;A8MWY0	C9JA41;H7C2N5;A8MWY0-2;A8MWY0-3;A8MWY0	UPF0577 protein KIAA1324-like	KIAA1324L	tr|C9JA41|C9JA41_HUMAN UPF0577 protein KIAA1324-like OS=Homo sapiens GN=KIAA1324L PE=4 SV=1;tr|H7C2N5|H7C2N5_HUMAN UPF0577 protein KIAA1324-like (Fragment) OS=Homo sapiens GN=KIAA1324L PE=4 SV=1;sp|A8MWY0-2|K132L_HUMAN Isoform 2 of UPF0577 protein KIAA1324	100340000	102730000	3905200	1929500	1975700	100340000	98558000	1	1	1	1.6	1.6	1.6	105.94	1	-2	203070000	2	1.6	1.6	1	1	5	1	1	1	1	1	1
194	K7EKF3;E7EVE9;A8MX75;P18074;P18074-2	K7EKF3;E7EVE9;A8MX75;P18074;P18074-2	TFIIH basal transcription factor complex helicase XPD subunit	ERCC2	tr|K7EKF3|K7EKF3_HUMAN TFIIH basal transcription factor complex helicase XPD subunit (Fragment) OS=Homo sapiens GN=ERCC2 PE=1 SV=1;tr|E7EVE9|E7EVE9_HUMAN TFIIH basal transcription factor complex helicase XPD subunit OS=Homo sapiens GN=ERCC2 PE=1 SV=1;tr|A8	10077000	3746900	1536000	1119600	416320	6397700	0	2	2	2	14.4	14.4	14.4	22.548	0.00030266	5.4994	13824000	2	9.4	5	1	1	5	1	1	1	1	1	1
195	A8MXP9;P43243;D6REM6;D6R991;H0Y8T4;B3KM87;P43243-2;D6RBK5;Q68E03;D6R8Z5;D6RBI2;D6RE02;D6RIA2;D6RB45;D6R9F3;D6RAM9;D6RAY2;D6RBS2;D6RCM3;D6REK4	A8MXP9;P43243;D6REM6;D6R991	Matrin-3	MATR3	tr|A8MXP9|A8MXP9_HUMAN Matrin-3 OS=Homo sapiens GN=MATR3 PE=1 SV=1;sp|P43243|MATR3_HUMAN Matrin-3 OS=Homo sapiens GN=MATR3 PE=1 SV=2;tr|D6REM6|D6REM6_HUMAN Matrin-3 OS=Homo sapiens GN=MATR3 PE=1 SV=1;tr|D6R991|D6R991_HUMAN Matrin-3 (Fragment) OS=Homo sapie	14908000000	14994000000	610240000	304240000	306000000	14850000000	14818000000	31	31	31	40.1	40.1	40.1	99.966	0	323.31	29902000000	491	40.1	34.3	244	247	20	31	25	31	25	31	25
196	A8MZH8;A8MXQ1;P53801	A8MZH8;A8MXQ1;P53801	Pituitary tumor-transforming gene 1 protein-interacting protein	PTTG1IP	tr|A8MZH8|A8MZH8_HUMAN Pituitary tumor-transforming gene 1 protein-interacting protein OS=Homo sapiens GN=PTTG1IP PE=4 SV=1;tr|A8MXQ1|A8MXQ1_HUMAN Pituitary tumor-transforming gene 1 protein-interacting protein OS=Homo sapiens GN=PTTG1IP PE=4 SV=1;sp|P5380	301700000	280880000	72823000	37713000	35110000	514730000	275520000	1	1	1	16.8	16.8	16.8	11.598	0	25.218	582580000	20	16.8	16.8	7	13	3	1	1	1	1	1	1
197	A8MXV4	A8MXV4	Nucleoside diphosphate-linked moiety X motif 19, mitochondrial	NUDT19	sp|A8MXV4|NUD19_HUMAN Nucleoside diphosphate-linked moiety X motif 19, mitochondrial OS=Homo sapiens GN=NUDT19 PE=1 SV=1	230460000	173590000	19240000	10974000	8266000	225590000	245170000	10	10	10	42.4	42.4	42.4	42.233	0	40.222	404050000	25	36.3	23.7	16	9	1	9	5	9	5	9	5
198	C9JBG0;A8MYQ9;E7ES60;Q9BZG1;C9JY26;Q9BZG1-4;K7EIF2;H7C0Y7;Q9BZG1-2;V9GY61;K7EJW7	C9JBG0;A8MYQ9;E7ES60;Q9BZG1;C9JY26;Q9BZG1-4;K7EIF2;H7C0Y7;Q9BZG1-2	Ras-related protein Rab-34	RAB34	tr|C9JBG0|C9JBG0_HUMAN Ras-related protein Rab-34, isoform NARR (Fragment) OS=Homo sapiens GN=RAB34 PE=1 SV=3;tr|A8MYQ9|A8MYQ9_HUMAN Ras-related protein Rab-34, isoform NARR OS=Homo sapiens GN=RAB34 PE=1 SV=2;tr|E7ES60|E7ES60_HUMAN Uncharacterized protein	116410000	5823600	7639900	7275900	363970	104430000	18391000	4	4	4	23.2	23.2	23.2	23.896	0.00031566	6.5377	122240000	6	23.2	7.1	5	1	11	4	1	4	1	4	1
199	A8MZF9;P55039;J3QR71;J3QRI9;J3QKW7	A8MZF9;P55039	Developmentally-regulated GTP-binding protein 2	DRG2	tr|A8MZF9|A8MZF9_HUMAN Developmentally-regulated GTP-binding protein 2 OS=Homo sapiens GN=DRG2 PE=1 SV=1;sp|P55039|DRG2_HUMAN Developmentally-regulated GTP-binding protein 2 OS=Homo sapiens GN=DRG2 PE=1 SV=1	7769600	7186400	650260	337810	312450	10047000	7268100	3	3	3	12.2	12.2	12.2	38.129	0.0005729	4.3669	14956000	3	8.5	6.4	1	2	5	2	2	2	2	2	2
200	A9X3U0;Q96GF1	A9X3U0;Q96GF1	E3 ubiquitin-protein ligase RNF185	RNF185	tr|A9X3U0|A9X3U0_HUMAN BSK65-TEST2 OS=Homo sapiens GN=RNF185 PE=2 SV=1;sp|Q96GF1|RN185_HUMAN E3 ubiquitin-protein ligase RNF185 OS=Homo sapiens GN=RNF185 PE=1 SV=1	33128000	34298000	11238000	5521400	5716300	22318000	40619000	1	1	1	9.6	9.6	9.6	16.786	0.0024759	2.5629	67426000	4	9.6	9.6	3	1	2	1	1	1	1	1	1
201	A9Z1X7;Q8IYB3-2;Q8IYB3;M0R088;E9PCT1;M0R1E7;M0QXG5	A9Z1X7;Q8IYB3-2;Q8IYB3;M0R088;E9PCT1	Serine/arginine repetitive matrix protein 1	SRRM1	tr|A9Z1X7|A9Z1X7_HUMAN Serine/arginine repetitive matrix protein 1 OS=Homo sapiens GN=SRRM1 PE=1 SV=1;sp|Q8IYB3-2|SRRM1_HUMAN Isoform 2 of Serine/arginine repetitive matrix protein 1 OS=Homo sapiens GN=SRRM1;sp|Q8IYB3|SRRM1_HUMAN Serine/arginine repetitive	267570000	140130000	7840400	5145600	2694800	236780000	173850000	4	4	4	8.1	8.1	8.1	103.39	0	62.633	407700000	31	8.1	8.1	13	18	7	4	4	4	4	4	4
202	B0QY89;Q9Y262-2;Q9Y262;B0QY90;C9JHP4;C9K0Q7;H7C3A0	B0QY89;Q9Y262-2;Q9Y262;B0QY90	Eukaryotic translation initiation factor 3 subunit L	EIF3L	tr|B0QY89|B0QY89_HUMAN Eukaryotic translation initiation factor 3 subunit L OS=Homo sapiens GN=EIF3L PE=1 SV=1;sp|Q9Y262-2|EIF3L_HUMAN Isoform 2 of Eukaryotic translation initiation factor 3 subunit L OS=Homo sapiens GN=EIF3L;sp|Q9Y262|EIF3L_HUMAN Eukaryot	202260000	229860000	13095000	6129200	6965500	201460000	262000000	14	14	14	32	32	32	70.901	0	125	432120000	49	25.7	28	20	29	7	12	12	12	12	12	12
203	B0QY95;Q9NQG6	B0QY95;Q9NQG6	Mitochondrial dynamics protein MID51	MIEF1	tr|B0QY95|B0QY95_HUMAN Mitochondrial dynamics protein MID51 OS=Homo sapiens GN=MIEF1 PE=1 SV=1;sp|Q9NQG6|MID51_HUMAN Mitochondrial dynamics protein MID51 OS=Homo sapiens GN=MIEF1 PE=1 SV=1	25060000	12518000	1342100	895010	447060	20843000	16071000	1	1	1	4.8	4.8	4.8	53.331	0.0012681	2.7853	37578000	2	4.8	4.8	1	1	2	1	1	1	1	1	1
204	B0QYD3;P31941-2;P31941;Q9UH17	B0QYD3;P31941-2;P31941;Q9UH17	DNA dC->dU-editing enzyme APOBEC-3A;DNA dC->dU-editing enzyme APOBEC-3B	APOBEC3B;APOBEC3A	tr|B0QYD3|B0QYD3_HUMAN DNA dC->dU-editing enzyme APOBEC-3B OS=Homo sapiens GN=APOBEC3B PE=4 SV=1;sp|P31941-2|ABC3A_HUMAN Isoform 2 of DNA dC->dU-editing enzyme APOBEC-3A OS=Homo sapiens GN=APOBEC3A;sp|P31941|ABC3A_HUMAN DNA dC->dU-editing enzyme APOBEC-3A	38480000	0	1374300	1374300	0	24431000	0	1	1	1	3.5	3.5	3.5	57.208	0.0012639	2.7599	38480000	2	3.5	0	2	0	4	1	0	1	0	1	0
205	B0QYK0;C9JGE3;Q01844-2;Q01844-6;Q01844-3;Q01844;Q01844-5;H7BY36	B0QYK0;C9JGE3;Q01844-2;Q01844-6;Q01844-3;Q01844;Q01844-5;H7BY36	RNA-binding protein EWS	EWSR1	tr|B0QYK0|B0QYK0_HUMAN RNA-binding protein EWS OS=Homo sapiens GN=EWSR1 PE=1 SV=1;tr|C9JGE3|C9JGE3_HUMAN EWS RNA-binding protein variant 6 OS=Homo sapiens GN=EWSR1 PE=1 SV=2;sp|Q01844-2|EWS_HUMAN Isoform EWS-B of RNA-binding protein EWS OS=Homo sapiens GN=	480410000	257230000	32072000	20888000	11184000	337550000	320410000	6	6	6	10.7	10.7	10.7	64.929	0	122.68	737650000	35	10.7	10.7	22	13	8	6	5	6	5	6	5
206	H3BQQ9;B0QYN7;P63279;H3BPC4;H3BRD1	H3BQQ9;B0QYN7;P63279;H3BPC4	SUMO-conjugating enzyme UBC9	UBE2I	tr|H3BQQ9|H3BQQ9_HUMAN SUMO-conjugating enzyme UBC9 (Fragment) OS=Homo sapiens GN=UBE2I PE=1 SV=1;tr|B0QYN7|B0QYN7_HUMAN SUMO-conjugating enzyme UBC9 OS=Homo sapiens GN=UBE2I PE=1 SV=1;sp|P63279|UBC9_HUMAN SUMO-conjugating enzyme UBC9 OS=Homo sapiens GN=UB	249670000	171940000	52701000	31208000	21493000	342280000	122790000	4	4	4	24.1	24.1	24.1	15.516	0	13.614	421610000	14	24.1	19	5	9	5	4	3	4	3	4	3
207	B0QYW5;F6RTR7;F8WE74;O43808	B0QYW5;F6RTR7;F8WE74;O43808	Peroxisomal membrane protein PMP34	SLC25A17	tr|B0QYW5|B0QYW5_HUMAN Peroxisomal membrane protein PMP34 OS=Homo sapiens GN=SLC25A17 PE=3 SV=1;tr|F6RTR7|F6RTR7_HUMAN Peroxisomal membrane protein PMP34 OS=Homo sapiens GN=SLC25A17 PE=4 SV=1;tr|F8WE74|F8WE74_HUMAN Peroxisomal membrane protein PMP34 OS=Hom	61853000	33098000	7304000	4758000	2546000	36571000	35656000	3	3	3	18.2	18.2	18.2	25.721	0.00030836	5.9063	94952000	9	10.2	12.9	6	3	4	2	2	2	2	2	2
208	F2Z2V0;B0QZ18;Q99829;A6PVH9;Q5JX45;E7ENH5;Q5JX56;Q5JX58;H0Y524;Q5JX59;Q5JX61;Q5JX60;Q5JX44;Q5JX52;Q5JX53;Q5JX54;Q5JX57;E7EV27;Q5JX55	F2Z2V0;B0QZ18;Q99829;A6PVH9;Q5JX45;E7ENH5	Copine-1	CPNE1	tr|F2Z2V0|F2Z2V0_HUMAN Copine-1 (Fragment) OS=Homo sapiens GN=CPNE1 PE=1 SV=1;tr|B0QZ18|B0QZ18_HUMAN Copine-1 OS=Homo sapiens GN=CPNE1 PE=1 SV=1;sp|Q99829|CPNE1_HUMAN Copine-1 OS=Homo sapiens GN=CPNE1 PE=1 SV=1;tr|A6PVH9|A6PVH9_HUMAN Copine-1 OS=Homo sapie	135220000	120300000	12167000	6438800	5728600	119810000	105020000	5	5	5	14.1	14.1	14.1	58.634	0	41.328	255520000	27	14.1	14.1	14	13	19	5	5	5	5	5	5
209	B0QZ43	B0QZ43		ERLIN1	tr|B0QZ43|B0QZ43_HUMAN Erlin-1 (Fragment) OS=Homo sapiens GN=ERLIN1 PE=1 SV=1	0	17578000	878890	0	878890	0	21479000	11	1	1	49.5	2.5	2.5	31.077	1	-2	17578000	1	38.2	49.5	0	1	1	9	11	0	1	0	1
210	B0QZE2;J3QKD2;Q15326-4;Q15326-2;Q15326-6;Q15326-3;Q15326;E7ENI9;Q15326-5	B0QZE2;J3QKD2;Q15326-4;Q15326-2;Q15326-6;Q15326-3;Q15326;E7ENI9;Q15326-5	Zinc finger MYND domain-containing protein 11	ZMYND11	tr|B0QZE2|B0QZE2_HUMAN Zinc finger MYND domain-containing protein 11 OS=Homo sapiens GN=ZMYND11 PE=1 SV=1;tr|J3QKD2|J3QKD2_HUMAN Zinc finger MYND domain-containing protein 11 OS=Homo sapiens GN=ZMYND11 PE=1 SV=1;sp|Q15326-4|ZMY11_HUMAN Isoform 4 of Zinc fi	32339000	34262000	2081300	1010600	1070700	34269000	45391000	2	2	2	5.9	5.9	5.9	61.286	0.00057372	4.389	66601000	3	2.7	5.9	2	1	9	1	2	1	2	1	2
211	B0YIW2;P02656	B0YIW2;P02656	Apolipoprotein C-III	APOC3	tr|B0YIW2|B0YIW2_HUMAN Apolipoprotein C-III OS=Homo sapiens GN=APOC3 PE=1 SV=1;sp|P02656|APOC3_HUMAN Apolipoprotein C-III OS=Homo sapiens GN=APOC3 PE=1 SV=1	5960100	0	662230	662230	0	3784000	0	1	1	1	13.7	13.7	13.7	12.815	0.00079197	3.2445	5960100	3	13.7	13.7	1	2	2	1	1	1	1	1	1
212	B0YJC4;P08670	B0YJC4;P08670	Vimentin	VIM	tr|B0YJC4|B0YJC4_HUMAN Vimentin OS=Homo sapiens GN=VIM PE=1 SV=1;sp|P08670|VIME_HUMAN Vimentin OS=Homo sapiens GN=VIM PE=1 SV=4	43958000	37675000	2473700	1332000	1141700	42948000	36445000	5	2	2	9.3	5.6	5.6	49.653	0.00030312	5.5259	81632000	7	9.3	9.3	4	3	2	5	5	2	2	2	2
213	B1AH87;P30536	B1AH87;P30536	Translocator protein	TSPO	tr|B1AH87|B1AH87_HUMAN Putative peripheral benzodiazepine receptor-related protein (Fragment) OS=Homo sapiens GN=TSPO PE=1 SV=1;sp|P30536|TSPOA_HUMAN Translocator protein OS=Homo sapiens GN=TSPO PE=1 SV=3	133980000	0	22330000	22330000	0	113480000	0	2	2	2	15	15	15	11.896	0.0027181	2.5393	133980000	3	15	7.5	2	1	2	2	1	2	1	2	1
214	B1AHB1;P33992	B1AHB1;P33992	DNA helicase;DNA replication licensing factor MCM5	MCM5	tr|B1AHB1|B1AHB1_HUMAN DNA replication licensing factor MCM5 OS=Homo sapiens GN=MCM5 PE=1 SV=1;sp|P33992|MCM5_HUMAN DNA replication licensing factor MCM5 OS=Homo sapiens GN=MCM5 PE=1 SV=5	159230000	57839000	4823700	3538400	1285300	77521000	97805000	6	6	6	11.7	11.7	11.7	77.592	0	14.918	217070000	9	11.7	4.5	7	2	2	6	2	6	2	6	2
215	B1AHD1;P55769	B1AHD1;P55769	NHP2-like protein 1;NHP2-like protein 1, N-terminally processed	NHP2L1	tr|B1AHD1|B1AHD1_HUMAN NHP2-like protein 1 OS=Homo sapiens GN=NHP2L1 PE=1 SV=1;sp|P55769|NH2L1_HUMAN NHP2-like protein 1 OS=Homo sapiens GN=NHP2L1 PE=1 SV=3	4093500000	4736100000	882950000	409350000	473610000	4599200000	4677200000	8	8	8	45.5	45.5	45.5	14.627	0	299.28	8829500000	112	45.5	45.5	52	60	2	8	8	8	8	8	8
216	H3BQI1;B1AKR6;Q9NP97;Q8TF09	H3BQI1;B1AKR6;Q9NP97;Q8TF09	Dynein light chain roadblock-type 1;Dynein light chain roadblock-type 2	DYNLRB2;DYNLRB1	tr|H3BQI1|H3BQI1_HUMAN Dynein light chain roadblock-type 2 OS=Homo sapiens GN=DYNLRB2 PE=4 SV=1;tr|B1AKR6|B1AKR6_HUMAN Dynein light chain roadblock-type 1 OS=Homo sapiens GN=DYNLRB1 PE=1 SV=1;sp|Q9NP97|DLRB1_HUMAN Dynein light chain roadblock-type 1 OS=Hom	8047500	15305000	3336100	1149600	2186400	5109400	14683000	1	1	1	9.6	9.6	9.6	13.852	0.00078145	3.0929	23352000	1	9.6	9.6	1	0	4	1	1	1	1	1	1
217	B1AKY9;P50993;H0Y7C1;P20648	B1AKY9;P50993;H0Y7C1	Sodium/potassium-transporting ATPase subunit alpha-2	ATP1A2	tr|B1AKY9|B1AKY9_HUMAN Sodium/potassium-transporting ATPase subunit alpha-2 OS=Homo sapiens GN=ATP1A2 PE=1 SV=1;sp|P50993|AT1A2_HUMAN Sodium/potassium-transporting ATPase subunit alpha-2 OS=Homo sapiens GN=ATP1A2 PE=1 SV=1;tr|H0Y7C1|H0Y7C1_HUMAN Sodium/pot	64787000	62595000	2274700	1156900	1117800	41133000	31564000	18	1	1	19.4	1.7	1.7	110.86	0.0007966	3.29	127380000	2	19.3	18.6	0	2	4	17	17	1	1	1	1
218	H0Y6Y8;B1AL05;Q8N983-4;Q8N983-3;Q8N983-2;Q8N983;Q8N983-6;Q8N983-7;H0YBU8;M0R051	H0Y6Y8;B1AL05;Q8N983-4;Q8N983-3;Q8N983-2;Q8N983;Q8N983-6;Q8N983-7;H0YBU8	39S ribosomal protein L43, mitochondrial	MRPL43	tr|H0Y6Y8|H0Y6Y8_HUMAN 39S ribosomal protein L43, mitochondrial (Fragment) OS=Homo sapiens GN=MRPL43 PE=1 SV=1;tr|B1AL05|B1AL05_HUMAN 39S ribosomal protein L43, mitochondrial OS=Homo sapiens GN=MRPL43 PE=1 SV=1;sp|Q8N983-4|RM43_HUMAN Isoform 4 of 39S ribos	165680000	133870000	23042000	12745000	10298000	104950000	133740000	4	4	4	24.3	24.3	24.3	18.657	0	14.782	299550000	8	20.1	17.8	4	4	10	3	3	3	3	3	3
219	B1ALM5;Q9P0T7	B1ALM5;Q9P0T7	Transmembrane protein 9	TMEM9	tr|B1ALM5|B1ALM5_HUMAN Transmembrane protein 9 OS=Homo sapiens GN=TMEM9 PE=1 SV=1;sp|Q9P0T7|TMEM9_HUMAN Transmembrane protein 9 OS=Homo sapiens GN=TMEM9 PE=1 SV=1	0	0	0	0	0	0	0	1	1	1	7	7	7	20.958	1	-2	0	1	0	7	0	1	2	0	1	0	1	0	1
220	B1AMF0;Q8N2K1;D6RD90;A6NGS0;Q8N2K1-2;Q8N2K1-3;D6RB84;D6RA15;D6RC43	B1AMF0;Q8N2K1;D6RD90;A6NGS0;Q8N2K1-2;Q8N2K1-3	Ubiquitin-conjugating enzyme E2 J2	UBE2J2	tr|B1AMF0|B1AMF0_HUMAN Ubiquitin-conjugating enzyme E2 J2 (Fragment) OS=Homo sapiens GN=UBE2J2 PE=4 SV=1;sp|Q8N2K1|UB2J2_HUMAN Ubiquitin-conjugating enzyme E2 J2 OS=Homo sapiens GN=UBE2J2 PE=1 SV=3;tr|D6RD90|D6RD90_HUMAN Ubiquitin-conjugating enzyme E2 J2	19063000	12335000	3139800	1906300	1233500	12103000	0	3	3	3	26	26	26	22.322	0.00031928	6.8124	31398000	4	14.3	11.7	3	1	9	2	1	2	1	2	1
221	R4GNH9;R4GMQ7;B1AMU7;B1AMU3;B1AMU4;Q9Y3B2	R4GNH9;R4GMQ7;B1AMU7;B1AMU3;B1AMU4;Q9Y3B2	Exosome complex component CSL4	EXOSC1	tr|R4GNH9|R4GNH9_HUMAN Exosome complex component CSL4 OS=Homo sapiens GN=EXOSC1 PE=1 SV=1;tr|R4GMQ7|R4GMQ7_HUMAN Exosome complex component CSL4 (Fragment) OS=Homo sapiens GN=EXOSC1 PE=1 SV=1;tr|B1AMU7|B1AMU7_HUMAN Exosome complex component CSL4 (Fragment)	20495000	23084000	4842100	2277200	2564900	14882000	25075000	1	1	1	11.5	11.5	11.5	15.105	0.0010323	2.982	43579000	5	11.5	11.5	3	2	6	1	1	1	1	1	1
222	B1ANH5;B1ANH0;B1ANG9;B1ANH2;Q16774;Q16774-2;Q16774-3;B1ANH6;B1ANH3	B1ANH5;B1ANH0;B1ANG9;B1ANH2;Q16774;Q16774-2;Q16774-3;B1ANH6;B1ANH3	Guanylate kinase	GUK1	tr|B1ANH5|B1ANH5_HUMAN Guanylate kinase OS=Homo sapiens GN=GUK1 PE=1 SV=1;tr|B1ANH0|B1ANH0_HUMAN Guanylate kinase (Fragment) OS=Homo sapiens GN=GUK1 PE=1 SV=1;tr|B1ANG9|B1ANG9_HUMAN Guanylate kinase OS=Homo sapiens GN=GUK1 PE=1 SV=2;tr|B1ANH2|B1ANH2_HUMAN	22535000	32277000	4982900	2048600	2934300	0	34170000	4	4	4	28.6	28.6	28.6	21.999	0	9.8934	54812000	3	11.6	22.6	1	2	9	2	3	2	3	2	3
223	B1ANR0;Q13310-2;Q13310;Q13310-3;H0Y5F5;H0YCC8;H0YEU6;B1ANR1;H0YEQ8;H0Y6X6;H0YER0	B1ANR0;Q13310-2;Q13310;Q13310-3;H0Y5F5	Polyadenylate-binding protein;Polyadenylate-binding protein 4	PABPC4	tr|B1ANR0|B1ANR0_HUMAN Poly(A) binding protein, cytoplasmic 4 (Inducible form), isoform CRA_e OS=Homo sapiens GN=PABPC4 PE=1 SV=1;sp|Q13310-2|PABP4_HUMAN Isoform 2 of Polyadenylate-binding protein 4 OS=Homo sapiens GN=PABPC4;sp|Q13310|PABP4_HUMAN Polyadeny	381670000	173340000	14231000	9786400	4444500	259360000	293860000	17	10	10	36.9	25.7	25.7	67.97	0	23.557	555010000	23	36.6	20.7	17	6	11	16	11	10	5	10	5
224	H3BLV0;B1AP13;H7BY55;P08174-4;P08174;P08174-3;P08174-5;P08174-2;P08174-6;P08174-7;B1AP15	H3BLV0;B1AP13;H7BY55;P08174-4;P08174;P08174-3;P08174-5;P08174-2;P08174-6;P08174-7;B1AP15	Complement decay-accelerating factor	CD55	tr|H3BLV0|H3BLV0_HUMAN Complement decay-accelerating factor (Fragment) OS=Homo sapiens GN=CD55 PE=1 SV=1;tr|B1AP13|B1AP13_HUMAN Complement decay-accelerating factor OS=Homo sapiens GN=CD55 PE=1 SV=1;tr|H7BY55|H7BY55_HUMAN Complement decay-accelerating fact	52219000	87326000	6977300	2611000	4366300	77292000	98113000	4	4	4	19.3	19.3	19.3	35.695	0	18.497	139550000	13	19.3	13.5	7	6	11	4	3	4	3	4	3
225	B1APQ1	B1APQ1		PITRM1	tr|B1APQ1|B1APQ1_HUMAN Presequence protease, mitochondrial (Fragment) OS=Homo sapiens GN=PITRM1 PE=1 SV=1	0	6490800	1081800	0	1081800	0	7470100	2	1	1	16.3	8.1	8.1	9.631	1	-2	6490800	1	0	16.3	0	1	1	0	2	0	1	0	1
226	B1AUU8;P42566;S4R3U1;P42566-2	B1AUU8;P42566	Epidermal growth factor receptor substrate 15	EPS15	tr|B1AUU8|B1AUU8_HUMAN Epidermal growth factor receptor substrate 15 OS=Homo sapiens GN=EPS15 PE=1 SV=1;sp|P42566|EPS15_HUMAN Epidermal growth factor receptor substrate 15 OS=Homo sapiens GN=EPS15 PE=1 SV=2	87825000	18629000	2314200	1909200	404970	0	22235000	5	5	5	8.9	8.9	8.9	83.653	0	7.6021	106450000	4	5.6	3.3	3	1	4	3	2	3	2	3	2
227	C9JIZ6;B1AVU8;P07602;P07602-2;P07602-3;Q5BJH1	C9JIZ6;B1AVU8;P07602;P07602-2;P07602-3;Q5BJH1	Prosaposin;Saposin-A;Saposin-B-Val;Saposin-B;Saposin-C;Saposin-D	PSAP	tr|C9JIZ6|C9JIZ6_HUMAN Prosaposin OS=Homo sapiens GN=PSAP PE=1 SV=2;tr|B1AVU8|B1AVU8_HUMAN Saposin-D OS=Homo sapiens GN=PSAP PE=1 SV=1;sp|P07602|SAP_HUMAN Prosaposin OS=Homo sapiens GN=PSAP PE=1 SV=2;sp|P07602-2|SAP_HUMAN Isoform Sap-mu-6 of Prosaposin OS=	2939300000	2504500000	160110000	86450000	73663000	3168900000	3002700000	17	17	17	34.3	34.3	34.3	58.44	0	107.49	5443900000	102	34.3	30.4	52	50	6	17	15	17	15	17	15
228	H3BS66;B2RUZ4	H3BS66;B2RUZ4	Small integral membrane protein 1	SMIM1	tr|H3BS66|H3BS66_HUMAN Small integral membrane protein 1 OS=Homo sapiens GN=SMIM1 PE=1 SV=1;sp|B2RUZ4|SMIM1_HUMAN Small integral membrane protein 1 OS=Homo sapiens GN=SMIM1 PE=1 SV=1	14713000	0	4904300	4904300	0	9341200	0	1	1	1	32.4	32.4	32.4	4.1915	0.00055051	3.7672	14713000	2	32.4	0	2	0	2	1	0	1	0	1	0
229	B3KPJ4;Q8IXK0-2;Q8IXK0-4;Q8IXK0;Q8IXK0-5;H7C528;Q8NDX5-2;Q8NDX5;Q8NDX5-7	B3KPJ4;Q8IXK0-2;Q8IXK0-4;Q8IXK0;Q8IXK0-5;H7C528;Q8NDX5-2;Q8NDX5;Q8NDX5-7	Polyhomeotic-like protein 2;Polyhomeotic-like protein 3	PHC2;PHC3	tr|B3KPJ4|B3KPJ4_HUMAN Polyhomeotic-like protein 2 OS=Homo sapiens GN=PHC2 PE=1 SV=1;sp|Q8IXK0-2|PHC2_HUMAN Isoform 2 of Polyhomeotic-like protein 2 OS=Homo sapiens GN=PHC2;sp|Q8IXK0-4|PHC2_HUMAN Isoform 4 of Polyhomeotic-like protein 2 OS=Homo sapiens GN=	79719000	0	2952600	2952600	0	78453000	0	2	2	2	5.6	5.6	5.6	50.403	0.00055991	4.0518	79719000	2	5.6	0	2	0	9	2	0	2	0	2	0
230	G5E9X1;B3KQH5;Q9UL03-3;Q9UL03	G5E9X1;B3KQH5;Q9UL03-3;Q9UL03	Integrator complex subunit 6	INTS6	tr|G5E9X1|G5E9X1_HUMAN Integrator complex subunit 6 OS=Homo sapiens GN=INTS6 PE=1 SV=1;tr|B3KQH5|B3KQH5_HUMAN Integrator complex subunit 6 OS=Homo sapiens GN=INTS6 PE=1 SV=1;sp|Q9UL03-3|INT6_HUMAN Isoform 3 of Integrator complex subunit 6 OS=Homo sapiens G	17031000	9364300	799870	516100	283770	24681000	10777000	3	3	3	8.1	8.1	8.1	65.418	0.00055602	3.9206	26396000	4	5.3	6.5	2	2	4	2	2	2	2	2	2
231	B3KR61;Q5TEU4;Q5TEU4-2	B3KR61;Q5TEU4;Q5TEU4-2	NADH dehydrogenase [ubiquinone] 1 alpha subcomplex assembly factor 5	NDUFAF5	tr|B3KR61|B3KR61_HUMAN HCG1811060, isoform CRA_c OS=Homo sapiens GN=NDUFAF5 PE=2 SV=1;sp|Q5TEU4|NDUF5_HUMAN NADH dehydrogenase [ubiquinone] 1 alpha subcomplex assembly factor 5 OS=Homo sapiens GN=NDUFAF5 PE=1 SV=1;sp|Q5TEU4-2|NDUF5_HUMAN Isoform 2 of NADH	48759000	15900000	3803500	2868200	935290	32448000	24909000	3	3	3	17.6	17.6	17.6	30.238	0.00030075	5.3755	64659000	4	13.1	13.1	2	2	3	2	2	2	2	2	2
232	H3BVI4;B3KS80;Q96S06	H3BVI4;B3KS80;Q96S06	Lipase maturation factor;Lipase maturation factor 1	LMF1	tr|H3BVI4|H3BVI4_HUMAN Lipase maturation factor OS=Homo sapiens GN=LMF1 PE=3 SV=1;tr|B3KS80|B3KS80_HUMAN Lipase maturation factor OS=Homo sapiens GN=LA16c-360B4.1 PE=2 SV=1;sp|Q96S06|LMF1_HUMAN Lipase maturation factor 1 OS=Homo sapiens GN=LMF1 PE=1 SV=1	23837000	0	1702700	1702700	0	15134000	0	1	1	1	6.9	6.9	6.9	40.147	0.00029577	4.9834	23837000	1	6.9	0	1	0	3	1	0	1	0	1	0
233	B3KS98;O15372;A0A087WZK9;E5RJT0;E5RFW7;E5RFH0;E5RGU4;E5RHC7;E5RH59	B3KS98;O15372;A0A087WZK9	Eukaryotic translation initiation factor 3 subunit H	EIF3H	tr|B3KS98|B3KS98_HUMAN Eukaryotic translation initiation factor 3 subunit H OS=Homo sapiens GN=EIF3H PE=1 SV=1;sp|O15372|EIF3H_HUMAN Eukaryotic translation initiation factor 3 subunit H OS=Homo sapiens GN=EIF3H PE=1 SV=1;tr|A0A087WZK9|A0A087WZK9_HUMAN Euka	58566000	56123000	4778700	2440200	2338400	51953000	68010000	7	7	7	29.8	29.8	29.8	41.581	0	16.34	114690000	13	27	16.7	6	7	9	6	4	6	4	6	4
234	F8W7U8;P49959-2;P49959;B3KTC7;F5GXT0	F8W7U8;P49959-2;P49959;B3KTC7;F5GXT0	Double-strand break repair protein MRE11A	MRE11A	tr|F8W7U8|F8W7U8_HUMAN Double-strand break repair protein MRE11A OS=Homo sapiens GN=MRE11A PE=1 SV=1;sp|P49959-2|MRE11_HUMAN Isoform 2 of Double-strand break repair protein MRE11A OS=Homo sapiens GN=MRE11A;sp|P49959|MRE11_HUMAN Double-strand break repair p	42472000	0	1089000	1089000	0	42765000	0	2	2	2	3.1	3.1	3.1	80.521	0.00056322	4.132	42472000	3	3.1	0	3	0	5	2	0	2	0	2	0
235	B3KTM8;H0YLJ3;Q9UBU8-3;Q9UBU8-2;Q9UBU8;H0YM21;H0YMJ0;H0YLV1;H0YMT8;H0YNE0	B3KTM8;H0YLJ3;Q9UBU8-3;Q9UBU8-2;Q9UBU8;H0YM21;H0YMJ0	Mortality factor 4-like protein 1	MORF4L1	tr|B3KTM8|B3KTM8_HUMAN Mortality factor 4-like protein 1 OS=Homo sapiens GN=MORF4L1 PE=1 SV=1;tr|H0YLJ3|H0YLJ3_HUMAN Mortality factor 4-like protein 1 OS=Homo sapiens GN=MORF4L1 PE=1 SV=1;sp|Q9UBU8-3|MO4L1_HUMAN Isoform 3 of Mortality factor 4-like protein	42243000	86252000	5586700	1836600	3750100	77823000	50411000	4	4	2	14.1	14.1	6.9	40.028	0.00057604	4.4945	128490000	4	9.5	6.9	2	2	10	3	2	3	2	1	2
236	B3KUS5;Q70CQ3;F5H3L3;F5H8D3	B3KUS5;Q70CQ3;F5H3L3;F5H8D3	Ubiquitin carboxyl-terminal hydrolase;Ubiquitin carboxyl-terminal hydrolase 30	USP30	tr|B3KUS5|B3KUS5_HUMAN Ubiquitin carboxyl-terminal hydrolase OS=Homo sapiens GN=USP30 PE=2 SV=1;sp|Q70CQ3|UBP30_HUMAN Ubiquitin carboxyl-terminal hydrolase 30 OS=Homo sapiens GN=USP30 PE=1 SV=1;tr|F5H3L3|F5H3L3_HUMAN Ubiquitin carboxyl-terminal hydrolase 3	20545000	0	856030	856030	0	19939000	0	2	2	2	6.2	6.2	6.2	55.108	0.00054496	3.6408	20545000	2	6.2	0	2	0	4	2	0	2	0	2	0
237	B3KVL5;Q8TBK6-2;Q8TBK6	B3KVL5;Q8TBK6-2;Q8TBK6	Zinc finger CCHC domain-containing protein 10	ZCCHC10	tr|B3KVL5|B3KVL5_HUMAN Zinc finger CCHC domain-containing protein 10 OS=Homo sapiens GN=ZCCHC10 PE=2 SV=1;sp|Q8TBK6-2|ZCH10_HUMAN Isoform 2 of Zinc finger CCHC domain-containing protein 10 OS=Homo sapiens GN=ZCCHC10;sp|Q8TBK6|ZCH10_HUMAN Zinc finger CCHC d	31587000	39142000	14146000	6317400	7828500	32014000	34252000	1	1	1	7.5	7.5	7.5	20.308	0	15.392	70729000	4	7.5	7.5	3	1	3	1	1	1	1	1	1
238	B3KW44;C9JE69;B5ME25;E7ETE0;Q9H825-2;Q9H825	B3KW44;C9JE69;B5ME25;E7ETE0;Q9H825-2;Q9H825	Methyltransferase-like protein 8	METTL8	tr|B3KW44|B3KW44_HUMAN Methyltransferase-like protein 8 OS=Homo sapiens GN=METTL8 PE=1 SV=1;tr|C9JE69|C9JE69_HUMAN Methyltransferase-like protein 8 (Fragment) OS=Homo sapiens GN=METTL8 PE=4 SV=1;tr|B5ME25|B5ME25_HUMAN Methyltransferase-like protein 8 (Frag	17102000	25464000	1637100	657780	979370	0	35958000	2	2	2	9.1	9.1	9.1	46.992	0.0034449	2.4596	42566000	2	3.7	5.4	1	1	6	1	1	1	1	1	1
239	B3KWE1;P12081-4;P12081;B4DDD8;P12081-3;P12081-2;E7ETE2;B4E1C5	B3KWE1;P12081-4;P12081;B4DDD8;P12081-3;P12081-2;E7ETE2;B4E1C5	Histidine--tRNA ligase, cytoplasmic	HARS	tr|B3KWE1|B3KWE1_HUMAN Histidine--tRNA ligase, cytoplasmic OS=Homo sapiens GN=HARS PE=1 SV=1;sp|P12081-4|SYHC_HUMAN Isoform 4 of Histidine--tRNA ligase, cytoplasmic OS=Homo sapiens GN=HARS;sp|P12081|SYHC_HUMAN Histidine--tRNA ligase, cytoplasmic OS=Homo sa	52924000	22745000	2440900	1707200	733720	24571000	37881000	7	4	4	17.5	10.2	10.2	49.623	0	13.491	75669000	4	15.9	9.3	2	2	8	6	4	3	2	3	2
240	B3KXX3;Q9UHW9-6;Q9UHW9-5;Q9UHW9-2;Q9UHW9-3;Q9UHW9-4;Q9UHW9;H0YMQ9;H0YKQ8;H0YNJ5	B3KXX3;Q9UHW9-6;Q9UHW9-5;Q9UHW9-2;Q9UHW9-3;Q9UHW9-4;Q9UHW9;H0YMQ9;H0YKQ8	Solute carrier family 12 member 6	SLC12A6	tr|B3KXX3|B3KXX3_HUMAN Solute carrier family 12 member 6 OS=Homo sapiens GN=SLC12A6 PE=1 SV=1;sp|Q9UHW9-6|S12A6_HUMAN Isoform 6 of Solute carrier family 12 member 6 OS=Homo sapiens GN=SLC12A6;sp|Q9UHW9-5|S12A6_HUMAN Isoform 5 of Solute carrier family 12 me	8780200	136270000	3223400	195120	3028300	19864000	156300000	4	2	2	5.2	3.2	3.2	106.94	0.00080278	3.3851	145050000	5	5.2	4.4	2	3	10	4	3	2	2	2	2
241	B4DGJ5;Q8N7H5-3;Q8N7H5;Q8N7H5-2	B4DGJ5;Q8N7H5-3;Q8N7H5;Q8N7H5-2	RNA polymerase II-associated factor 1 homolog	PAF1	tr|B4DGJ5|B4DGJ5_HUMAN RNA polymerase II-associated factor 1 homolog OS=Homo sapiens GN=PAF1 PE=1 SV=1;sp|Q8N7H5-3|PAF1_HUMAN Isoform 3 of RNA polymerase II-associated factor 1 homolog OS=Homo sapiens GN=PAF1;sp|Q8N7H5|PAF1_HUMAN RNA polymerase II-associat	33783000	26993000	2894100	1608700	1285400	36539000	42147000	2	2	2	8.7	8.7	8.7	32.92	0.00057803	4.5222	60776000	7	8.7	8.7	2	5	4	2	2	2	2	2	2
242	B4DGL8;O75027;O75027-2;A0A087WW65;O75027-3;E9PJR8	B4DGL8;O75027;O75027-2;A0A087WW65;O75027-3	ATP-binding cassette sub-family B member 7, mitochondrial	ABCB7	tr|B4DGL8|B4DGL8_HUMAN ATP-binding cassette sub-family B member 7, mitochondrial (Fragment) OS=Homo sapiens GN=ABCB7 PE=1 SV=1;sp|O75027|ABCB7_HUMAN ATP-binding cassette sub-family B member 7, mitochondrial OS=Homo sapiens GN=ABCB7 PE=1 SV=2;sp|O75027-2|AB	298200000	339670000	17719000	8283200	9435300	427920000	433150000	8	8	8	21.2	21.2	21.2	77.12	0	37.572	637870000	25	14.4	18.4	14	11	6	6	7	6	7	6	7
243	J3QKS7;B4DGM3;Q969G3-6;Q969G3-5;Q969G3-3;Q969G3-2;Q969G3-4;Q969G3;K7EMQ8;H7C048;J3KT85;J3QR61	J3QKS7;B4DGM3;Q969G3-6;Q969G3-5;Q969G3-3;Q969G3-2;Q969G3-4;Q969G3;K7EMQ8;H7C048	SWI/SNF-related matrix-associated actin-dependent regulator of chromatin subfamily E member 1	SMARCE1	tr|J3QKS7|J3QKS7_HUMAN SWI/SNF-related matrix-associated actin-dependent regulator of chromatin subfamily E member 1 (Fragment) OS=Homo sapiens GN=SMARCE1 PE=1 SV=1;tr|B4DGM3|B4DGM3_HUMAN SWI/SNF-related matrix-associated actin-dependent regulator of chrom	107560000	144440000	11454000	4888900	6565500	138640000	159590000	4	4	4	18.1	18.1	18.1	33.433	0	15.845	252000000	13	18.1	13.9	7	6	12	4	3	4	3	4	3
244	B4DHE8;Q96DH6-2;Q96DH6;B4DM51;Q96DH6-3;J3KTC1;J3QKT5;H0YHB7;O43347	B4DHE8;Q96DH6-2;Q96DH6;B4DM51;Q96DH6-3;J3KTC1	RNA-binding protein Musashi homolog 2	MSI2	tr|B4DHE8|B4DHE8_HUMAN RNA-binding protein Musashi homolog 2 OS=Homo sapiens GN=MSI2 PE=2 SV=1;sp|Q96DH6-2|MSI2H_HUMAN Isoform 2 of RNA-binding protein Musashi homolog 2 OS=Homo sapiens GN=MSI2;sp|Q96DH6|MSI2H_HUMAN RNA-binding protein Musashi homolog 2 OS	182310000	23980000	17191000	15192000	1998300	98063000	44699000	4	4	4	17.9	17.9	17.9	34.812	0	18.142	206290000	10	17.9	4.6	8	2	9	4	1	4	1	4	1
245	B4DHJ7;Q12983;H0YBC7;A0A087WVL5;O60238-2;O60238	B4DHJ7;Q12983	BCL2/adenovirus E1B 19 kDa protein-interacting protein 3	BNIP3	tr|B4DHJ7|B4DHJ7_HUMAN BCL2/adenovirus E1B 19 kDa protein-interacting protein 3 OS=Homo sapiens GN=BNIP3 PE=1 SV=1;sp|Q12983|BNIP3_HUMAN BCL2/adenovirus E1B 19 kDa protein-interacting protein 3 OS=Homo sapiens GN=BNIP3 PE=1 SV=2	113950000	62653000	14717000	9495900	5221100	95056000	98708000	5	5	5	25.6	25.6	25.6	19.943	0	12.416	176600000	11	25.6	19.4	6	5	6	5	4	5	4	5	4
246	B4DI03;K7EJQ7;Q9BY50	B4DI03;K7EJQ7;Q9BY50	Signal peptidase complex catalytic subunit SEC11;Signal peptidase complex catalytic subunit SEC11C	SEC11L3;SEC11C	tr|B4DI03|B4DI03_HUMAN SEC11-like 3 (S. cerevisiae), isoform CRA_a OS=Homo sapiens GN=SEC11L3 PE=1 SV=1;tr|K7EJQ7|K7EJQ7_HUMAN Signal peptidase complex catalytic subunit SEC11C OS=Homo sapiens GN=SEC11C PE=1 SV=1;sp|Q9BY50|SC11C_HUMAN Signal peptidase comp	273520000	246320000	57760000	30391000	27369000	288130000	296540000	6	6	6	44.9	44.9	44.9	17.404	0	23.116	519840000	18	44.9	19.9	9	9	3	6	3	6	3	6	3
247	B4DIP2;Q96RT1-7;Q96RT1-6;Q96RT1-4;Q96RT1-5;Q96RT1-3;Q96RT1-9;Q96RT1-2;Q96RT1;Q96RT1-8	B4DIP2;Q96RT1-7;Q96RT1-6;Q96RT1-4;Q96RT1-5;Q96RT1-3;Q96RT1-9;Q96RT1-2;Q96RT1;Q96RT1-8	Protein LAP2	ERBB2IP	tr|B4DIP2|B4DIP2_HUMAN Protein LAP2 OS=Homo sapiens GN=ERBB2IP PE=1 SV=1;sp|Q96RT1-7|LAP2_HUMAN Isoform 7 of Protein LAP2 OS=Homo sapiens GN=ERBB2IP;sp|Q96RT1-6|LAP2_HUMAN Isoform 6 of Protein LAP2 OS=Homo sapiens GN=ERBB2IP;sp|Q96RT1-4|LAP2_HUMAN Isoform	35267000	28943000	1783600	979640	803980	40460000	34384000	4	4	4	9	9	9	68.568	0	14.696	64210000	6	7	9	2	4	10	3	4	3	4	3	4
248	H3BRY6;B4DVT3;B4DJL6;Q96SY0-4;Q96SY0-3;Q96SY0	H3BRY6;B4DVT3;B4DJL6;Q96SY0-4;Q96SY0-3;Q96SY0	von Willebrand factor A domain-containing protein 9	VWA9	tr|H3BRY6|H3BRY6_HUMAN von Willebrand factor A domain-containing protein 9 OS=Homo sapiens GN=VWA9 PE=1 SV=1;tr|B4DVT3|B4DVT3_HUMAN cDNA FLJ50705 OS=Homo sapiens GN=VWA9 PE=1 SV=1;tr|B4DJL6|B4DJL6_HUMAN cDNA FLJ55475 OS=Homo sapiens GN=VWA9 PE=1 SV=1;sp|Q9	34912000	0	1342800	1342800	0	30164000	0	2	2	2	7.5	7.5	7.5	51.583	0	7.8849	34912000	1	7.5	0	1	0	6	2	0	2	0	2	0
249	B4DJV2;O75390;H0YIC4;F8VRI6;F8VPA1;H0YH82;F8VPF9;F8VR34;F8VTT8;F8W1S4;F8W4S1;F8VRP1;F8VX68;F8W642;F8VZK9;F8VX07;F8VWQ5;F8VU34;F8W0J2	B4DJV2;O75390	Citrate synthase;Citrate synthase, mitochondrial	CS	tr|B4DJV2|B4DJV2_HUMAN Citrate synthase OS=Homo sapiens GN=CS PE=1 SV=1;sp|O75390|CISY_HUMAN Citrate synthase, mitochondrial OS=Homo sapiens GN=CS PE=1 SV=2	12093000000	16325000000	1495700000	636500000	859230000	15993000000	16643000000	19	19	18	51.4	51.4	49.4	50.431	0	266.82	28419000000	292	39.5	46.8	117	175	19	17	16	17	16	16	15
250	B4DJV5;Q13610;F8VZ56	B4DJV5;Q13610	Periodic tryptophan protein 1 homolog	PWP1	tr|B4DJV5|B4DJV5_HUMAN Periodic tryptophan protein 1 homolog OS=Homo sapiens GN=PWP1 PE=1 SV=1;sp|Q13610|PWP1_HUMAN Periodic tryptophan protein 1 homolog OS=Homo sapiens GN=PWP1 PE=1 SV=1	124370000	67804000	8735000	5653000	3082000	123340000	81572000	6	6	6	23.9	23.9	23.9	49.038	0	16.031	192170000	12	23.9	8.4	8	4	3	6	2	6	2	6	2
251	B4DKB2;P42892-3;P42892-2;P42892-4;P42892	B4DKB2;P42892-3;P42892-2;P42892-4;P42892	Endothelin-converting enzyme 1	ECE1	tr|B4DKB2|B4DKB2_HUMAN Endothelin-converting enzyme 1 OS=Homo sapiens GN=ECE1 PE=1 SV=1;sp|P42892-3|ECE1_HUMAN Isoform C of Endothelin-converting enzyme 1 OS=Homo sapiens GN=ECE1;sp|P42892-2|ECE1_HUMAN Isoform A of Endothelin-converting enzyme 1 OS=Homo sa	46495000	0	1081300	1081300	0	27818000	0	4	4	4	7.6	7.6	7.6	83.573	0	9.9681	46495000	4	7.6	0	4	0	5	4	0	4	0	4	0
252	B4DKD5;H7C316;Q7Z6M4;C9JX74;H7C1N9;B5MBW3;C9JNJ7;B4DFP7;E7EW93	B4DKD5;H7C316;Q7Z6M4;C9JX74;H7C1N9;B5MBW3;C9JNJ7;B4DFP7;E7EW93	Transcription termination factor 4, mitochondrial;mTERF domain-containing protein 2 processed	MTERF4	tr|B4DKD5|B4DKD5_HUMAN Transcription termination factor 4, mitochondrial OS=Homo sapiens GN=MTERF4 PE=1 SV=1;tr|H7C316|H7C316_HUMAN Transcription termination factor 4, mitochondrial (Fragment) OS=Homo sapiens GN=MTERF4 PE=1 SV=1;sp|Q7Z6M4|MTEF4_HUMAN Trans	13111000	13863000	1284500	624350	660160	0	15955000	2	2	2	12.7	12.7	12.7	28.667	0.0012566	2.7215	26975000	2	8.7	4	1	1	9	1	1	1	1	1	1
253	B4DLN1;I3L1E8;F6QW41	B4DLN1			tr|B4DLN1|B4DLN1_HUMAN Mitochondrial dicarboxylate carrier OS=Homo sapiens GN=SLC25A10 PE=2 SV=1	8263700000	7465300000	629160000	330550000	298610000	7364200000	7135100000	19	19	0	53.2	53.2	0	48.099	0	323.31	15729000000	319	50.9	47.5	134	185	3	18	17	18	17	0	0
254	B4DMT0;Q96AN5-2;Q96AN5	B4DMT0;Q96AN5-2;Q96AN5	Transmembrane protein 143	TMEM143	tr|B4DMT0|B4DMT0_HUMAN Transmembrane protein 143 OS=Homo sapiens GN=TMEM143 PE=2 SV=1;sp|Q96AN5-2|TM143_HUMAN Isoform 2 of Transmembrane protein 143 OS=Homo sapiens GN=TMEM143;sp|Q96AN5|TM143_HUMAN Transmembrane protein 143 OS=Homo sapiens GN=TMEM143 PE=2	1334200	44661000	1642700	47652	1595000	0	69232000	3	3	3	9	9	9	47.717	0.0076391	2.0888	45995000	3	3.3	8.7	1	2	3	1	2	1	2	1	2
255	B4DQI1;H0Y3H6;P06681-2;P06681-3;P06681;E9PDZ0	B4DQI1;H0Y3H6;P06681-2;P06681-3;P06681;E9PDZ0	Complement C2;Complement C2b fragment;Complement C2a fragment	C2	tr|B4DQI1|B4DQI1_HUMAN Complement C2b fragment OS=Homo sapiens GN=C2 PE=2 SV=1;tr|H0Y3H6|H0Y3H6_HUMAN Complement C2b fragment (Fragment) OS=Homo sapiens GN=C2 PE=3 SV=1;sp|P06681-2|CO2_HUMAN Isoform 2 of Complement C2 OS=Homo sapiens GN=C2;sp|P06681-3|CO2_	36693000	13718000	1292600	940840	351750	45466000	21175000	4	4	2	9.1	9.1	4	56.466	0	14.723	50411000	8	6.3	6.7	3	5	6	3	3	3	3	2	2
256	B4DQI4;F8W9U3;Q96IU4;Q96IU4-2	B4DQI4;F8W9U3;Q96IU4;Q96IU4-2	Alpha/beta hydrolase domain-containing protein 14B	ABHD14B	tr|B4DQI4|B4DQI4_HUMAN Alpha/beta hydrolase domain-containing protein 14B OS=Homo sapiens GN=ABHD14B PE=1 SV=1;tr|F8W9U3|F8W9U3_HUMAN Alpha/beta hydrolase domain-containing protein 14B OS=Homo sapiens GN=ABHD14B PE=1 SV=1;sp|Q96IU4|ABHEB_HUMAN Alpha/beta h	17623000	0	1602100	1602100	0	16101000	0	2	2	2	10.6	10.6	10.6	19.756	0.0089433	1.9611	17623000	2	10.6	0	2	0	4	2	0	2	0	2	0
257	Q13595-2;B4DQI6;Q13595-3;Q13595	Q13595-2;B4DQI6;Q13595-3;Q13595	Transformer-2 protein homolog alpha	TRA2A	sp|Q13595-2|TRA2A_HUMAN Isoform Short of Transformer-2 protein homolog alpha OS=Homo sapiens GN=TRA2A;tr|B4DQI6|B4DQI6_HUMAN Transformer-2 protein homolog alpha OS=Homo sapiens GN=TRA2A PE=1 SV=1;sp|Q13595-3|TRA2A_HUMAN Isoform 3 of Transformer-2 protein h	378570000	425570000	134020000	63095000	70928000	302810000	535040000	5	5	5	57.5	57.5	57.5	12.951	0	51.559	804140000	37	49.6	46.9	20	17	4	4	4	4	4	4	4
258	H7C3D3;H0Y2Y8;B4DQX7;Q15942	H7C3D3;H0Y2Y8;B4DQX7;Q15942	Zyxin	ZYX	tr|H7C3D3|H7C3D3_HUMAN Zyxin (Fragment) OS=Homo sapiens GN=ZYX PE=1 SV=1;tr|H0Y2Y8|H0Y2Y8_HUMAN Zyxin (Fragment) OS=Homo sapiens GN=ZYX PE=1 SV=1;tr|B4DQX7|B4DQX7_HUMAN Zyxin OS=Homo sapiens GN=ZYX PE=1 SV=1;sp|Q15942|ZYX_HUMAN Zyxin OS=Homo sapiens GN=ZYX	34453000	29316000	6376900	3445300	2931600	46812000	33970000	2	2	2	31.2	31.2	31.2	18.055	0	14.944	63769000	9	31.2	31.2	4	5	4	2	2	2	2	2	2
259	B4DR61;P61619;P61619-3;H7C1Q9;H7C069;A6NK38;F2Z2C7;A6NIF9;C9JJV4	B4DR61;P61619;P61619-3	Protein transport protein Sec61 subunit alpha isoform 1	SEC61A1	tr|B4DR61|B4DR61_HUMAN Protein transport protein Sec61 subunit alpha isoform 1 OS=Homo sapiens GN=SEC61A1 PE=1 SV=1;sp|P61619|S61A1_HUMAN Protein transport protein Sec61 subunit alpha isoform 1 OS=Homo sapiens GN=SEC61A1 PE=1 SV=2;sp|P61619-3|S61A1_HUMAN I	2727200000	2406900000	270210000	143530000	126680000	2269800000	2702900000	9	9	5	22.2	22.2	15.1	52.949	0	55.056	5134000000	76	22.2	17.4	37	39	9	9	8	9	8	5	4
260	B4DRN8;Q5W0Z9;Q5W0Z9-2;Q5W0Z9-4;Q5W0Z9-3	B4DRN8;Q5W0Z9;Q5W0Z9-2;Q5W0Z9-4;Q5W0Z9-3	Palmitoyltransferase;Probable palmitoyltransferase ZDHHC20	ZDHHC20	tr|B4DRN8|B4DRN8_HUMAN Palmitoyltransferase OS=Homo sapiens GN=ZDHHC20 PE=1 SV=1;sp|Q5W0Z9|ZDH20_HUMAN Probable palmitoyltransferase ZDHHC20 OS=Homo sapiens GN=ZDHHC20 PE=1 SV=1;sp|Q5W0Z9-2|ZDH20_HUMAN Isoform 2 of Probable palmitoyltransferase ZDHHC20 OS=	8400300	9014000	967460	466690	500780	8250700	0	2	2	2	9.6	9.6	9.6	33.743	0.00079745	3.3024	17414000	2	9.6	3.8	2	0	5	2	1	2	1	2	1
261	E7EX17;B4DS13;P23588;F8W0K0;F8VRU1;F8VYE9;F8VSC7;F8VP89;F8VX11	E7EX17;B4DS13;P23588;F8W0K0;F8VRU1;F8VYE9;F8VSC7;F8VP89;F8VX11	Eukaryotic translation initiation factor 4B	EIF4B	tr|E7EX17|E7EX17_HUMAN Eukaryotic translation initiation factor 4B OS=Homo sapiens GN=EIF4B PE=1 SV=1;tr|B4DS13|B4DS13_HUMAN Eukaryotic translation initiation factor 4B OS=Homo sapiens GN=EIF4B PE=1 SV=1;sp|P23588|IF4B_HUMAN Eukaryotic translation initiati	54922000	0	1484400	1484400	0	54922000	0	3	3	3	6.2	6.2	6.2	69.697	0	13.782	54922000	3	6.2	3.4	2	1	9	2	1	2	1	2	1
262	H3BLV9;Q5R363;B4DS61;Q96SB4;Q96SB4-3	H3BLV9;Q5R363;B4DS61;Q96SB4;Q96SB4-3	SRSF protein kinase 1	SRPK1	tr|H3BLV9|H3BLV9_HUMAN SRSF protein kinase 1 (Fragment) OS=Homo sapiens GN=SRPK1 PE=1 SV=1;tr|Q5R363|Q5R363_HUMAN SRSF protein kinase 1 OS=Homo sapiens GN=SRPK1 PE=1 SV=2;tr|B4DS61|B4DS61_HUMAN SFRS protein kinase 1, isoform CRA_f OS=Homo sapiens GN=SRPK1	192100000	169540000	10959000	5821400	5137400	198700000	177340000	7	7	7	14.3	14.3	14.3	76.039	0	18.738	361640000	21	14.3	10.6	10	11	5	7	5	7	5	7	5
263	M0R0Q7;F5GZ28;P18858-2;B4DTU4;P18858;B4E135	M0R0Q7;F5GZ28;P18858-2;B4DTU4;P18858;B4E135	DNA ligase;DNA ligase 1	LIG1	tr|M0R0Q7|M0R0Q7_HUMAN DNA ligase OS=Homo sapiens GN=LIG1 PE=1 SV=1;tr|F5GZ28|F5GZ28_HUMAN DNA ligase OS=Homo sapiens GN=LIG1 PE=1 SV=1;sp|P18858-2|DNLI1_HUMAN Isoform 2 of DNA ligase 1 OS=Homo sapiens GN=LIG1;tr|B4DTU4|B4DTU4_HUMAN DNA ligase OS=Homo sapi	11771000	0	240230	240230	0	17058000	0	2	2	2	2.8	2.8	2.8	88.386	0.0010331	2.9928	11771000	2	1.5	1.2	1	1	6	1	1	1	1	1	1
264	B4DUC8;Q13126-4;Q13126;Q13126-3;Q13126-2;J3KRN1;J3QSB7;Q13126-7;Q13126-6;Q13126-5	B4DUC8;Q13126-4;Q13126;Q13126-3;Q13126-2;J3KRN1;J3QSB7;Q13126-7;Q13126-6;Q13126-5	S-methyl-5-thioadenosine phosphorylase;Purine nucleoside phosphorylase	MTAP	tr|B4DUC8|B4DUC8_HUMAN S-methyl-5-thioadenosine phosphorylase OS=Homo sapiens GN=MTAP PE=1 SV=1;sp|Q13126-4|MTAP_HUMAN Isoform 4 of S-methyl-5-thioadenosine phosphorylase OS=Homo sapiens GN=MTAP;sp|Q13126|MTAP_HUMAN S-methyl-5-thioadenosine phosphorylas	16221000	0	811030	811030	0	10298000	0	2	2	2	14	14	14	33.186	0.00032573	7.4136	16221000	3	14	0	3	0	10	2	0	2	0	2	0
265	C9JAP5;C9JEN3;C9IYT2;F8WDY4;C9IZ27;C9JW19;C9JWV9;B4DUD2;Q969X1	C9JAP5;C9JEN3;C9IYT2;F8WDY4;C9IZ27;C9JW19;C9JWV9;B4DUD2;Q969X1	Protein lifeguard 3	TMBIM1	tr|C9JAP5|C9JAP5_HUMAN Protein lifeguard 3 (Fragment) OS=Homo sapiens GN=TMBIM1 PE=1 SV=3;tr|C9JEN3|C9JEN3_HUMAN Protein lifeguard 3 (Fragment) OS=Homo sapiens GN=TMBIM1 PE=1 SV=1;tr|C9IYT2|C9IYT2_HUMAN Protein lifeguard 3 (Fragment) OS=Homo sapiens GN=TMB	38932000	41262000	40097000	19466000	20631000	38932000	39585000	1	1	1	15.2	15.2	15.2	9.7926	0	10.316	80194000	3	15.2	15.2	2	1	9	1	1	1	1	1	1
266	F8VRR3;F8VQZ7;P50579-2;B4DUX5;P50579;G3V1U3;F8VZX9;F8VY03	F8VRR3;F8VQZ7;P50579-2;B4DUX5;P50579;G3V1U3	Methionine aminopeptidase 2	METAP2	tr|F8VRR3|F8VRR3_HUMAN Methionine aminopeptidase 2 OS=Homo sapiens GN=METAP2 PE=1 SV=1;tr|F8VQZ7|F8VQZ7_HUMAN Methionine aminopeptidase 2 OS=Homo sapiens GN=METAP2 PE=1 SV=1;sp|P50579-2|MAP2_HUMAN Isoform 2 of Methionine aminopeptidase 2 OS=Homo sapiens GN	80732000	54742000	5017500	2990100	2027500	55223000	55699000	5	5	5	13.6	13.6	13.6	48.876	0	7.7982	135470000	10	13.6	7.7	5	5	8	5	3	5	3	5	3
267	H3BPM8;Q13286-4;Q13286-2;B4DXL3;Q13286-3;Q13286;O95090;Q9UBD8;Q2TA70;B4DFF3;Q13286-5;Q13286-6;H3BPL0;H3BRU8;Q9UBH5;H3BNK7;H3BR84;H3BQ48;B4DMY6	H3BPM8;Q13286-4;Q13286-2;B4DXL3;Q13286-3;Q13286;O95090;Q9UBD8;Q2TA70;B4DFF3;Q13286-5;Q13286-6	Battenin	CLN3	tr|H3BPM8|H3BPM8_HUMAN Battenin OS=Homo sapiens GN=CLN3 PE=1 SV=1;sp|Q13286-4|CLN3_HUMAN Isoform 4 of Battenin OS=Homo sapiens GN=CLN3;sp|Q13286-2|CLN3_HUMAN Isoform 2 of Battenin OS=Homo sapiens GN=CLN3;tr|B4DXL3|B4DXL3_HUMAN Battenin OS=Homo sapiens GN=C	8131600	10907000	1903900	813160	1090700	10633000	16657000	3	3	3	12.9	12.9	12.9	36.272	0	8.0698	19039000	6	12.9	4.4	3	3	19	3	1	3	1	3	1
268	E7EU85;E9PFF5;B4DXZ6;P51114-3;P51114-2;P51114;C9JZE0;C9JY20;C9J5B4;C9IZ22;C9JAJ4	E7EU85;E9PFF5;B4DXZ6;P51114-3;P51114-2;P51114	Fragile X mental retardation syndrome-related protein 1	FXR1	tr|E7EU85|E7EU85_HUMAN Fragile X mental retardation syndrome-related protein 1 OS=Homo sapiens GN=FXR1 PE=1 SV=1;tr|E9PFF5|E9PFF5_HUMAN Fragile X mental retardation syndrome-related protein 1 OS=Homo sapiens GN=FXR1 PE=1 SV=1;tr|B4DXZ6|B4DXZ6_HUMAN Fragile	290610000	119200000	15762000	11177000	4584800	191690000	187680000	8	8	7	22.2	22.2	20.5	50.99	0	66.082	409810000	21	22.2	11	11	10	11	8	5	8	5	7	5
269	G3V4W0;B4DY08;G3V4C1;P07910-2;P07910-4;G3V5X6;G3V3K6;G3V251;G3V2D6;P07910-3;B4DSU6;G3V5V7;B2RXH8;G3V4M8;G3V2H6;E5RG71;B3KT61;Q86SE5;Q86SE5-3	G3V4W0;B4DY08;G3V4C1;P07910-2;P07910-4;G3V5X6;G3V3K6;G3V251;G3V2D6;P07910-3	Heterogeneous nuclear ribonucleoproteins C1/C2	HNRNPC	tr|G3V4W0|G3V4W0_HUMAN Heterogeneous nuclear ribonucleoproteins C1/C2 (Fragment) OS=Homo sapiens GN=HNRNPC PE=1 SV=1;tr|B4DY08|B4DY08_HUMAN Heterogeneous nuclear ribonucleoproteins C1/C2 OS=Homo sapiens GN=HNRNPC PE=1 SV=1;tr|G3V4C1|G3V4C1_HUMAN Heterogene	48873000000	41178000000	4502500000	2443600000	2058900000	34408000000	41469000000	13	13	1	43.5	43.5	6.9	28.916	0	323.31	90051000000	759	43.5	43.5	342	417	19	13	13	13	13	1	1
270	F8W1R9;B4DY26;P36897;P36897-2	F8W1R9;B4DY26;P36897;P36897-2	Receptor protein serine/threonine kinase;TGF-beta receptor type-1	TGFBR1	tr|F8W1R9|F8W1R9_HUMAN TGF-beta receptor type-1 OS=Homo sapiens GN=TGFBR1 PE=1 SV=1;tr|B4DY26|B4DY26_HUMAN TGF-beta receptor type-1 OS=Homo sapiens GN=TGFBR1 PE=1 SV=1;sp|P36897|TGFR1_HUMAN TGF-beta receptor type-1 OS=Homo sapiens GN=TGFBR1 PE=1 SV=1;sp|P3	4655000	0	221670	221670	0	6745900	0	1	1	1	5.5	5.5	5.5	41.849	0.00080494	3.413	4655000	0	5.5	0	0	0	4	1	0	1	0	1	0
271	B4DZU5;Q7Z7C8;Q7Z7C8-2;Q7Z7C8-4	B4DZU5;Q7Z7C8;Q7Z7C8-2;Q7Z7C8-4	Transcription initiation factor TFIID subunit 8	TAF8	tr|B4DZU5|B4DZU5_HUMAN Transcription initiation factor TFIID subunit 8 OS=Homo sapiens GN=TAF8 PE=1 SV=1;sp|Q7Z7C8|TAF8_HUMAN Transcription initiation factor TFIID subunit 8 OS=Homo sapiens GN=TAF8 PE=1 SV=1;sp|Q7Z7C8-2|TAF8_HUMAN Isoform 2 of Transcriptio	4163500	0	416350	416350	0	6033600	0	1	1	1	6.8	6.8	6.8	26.412	0.0076464	2.0957	4163500	1	6.8	0	1	0	4	1	0	1	0	1	0
272	C9JDH9;C9J6L2;C9JCC0;C9J232;H7C279;Q8NBY1;B4E0Y9;O00506-3;Q9P289-2;O00506-2;Q9P289;O00506	C9JDH9;C9J6L2;C9JCC0;C9J232;H7C279;Q8NBY1;B4E0Y9;O00506-3;Q9P289-2;O00506-2;Q9P289;O00506	Serine/threonine-protein kinase 25;Serine/threonine-protein kinase 26	STK25;STK26	tr|C9JDH9|C9JDH9_HUMAN Serine/threonine-protein kinase 25 (Fragment) OS=Homo sapiens GN=STK25 PE=4 SV=1;tr|C9J6L2|C9J6L2_HUMAN Serine/threonine-protein kinase 25 (Fragment) OS=Homo sapiens GN=STK25 PE=4 SV=1;tr|C9JCC0|C9JCC0_HUMAN Serine/threonine-protein	24430000	3842100	2570200	2220900	349280	14128000	11524000	2	2	1	20.9	20.9	10.1	16.366	0.00056211	4.094	28272000	3	20.9	10.1	2	1	12	2	1	2	1	1	1
273	B4E1G1;Q9BUN8-2;Q9BUN8;E5RGY0	B4E1G1;Q9BUN8-2;Q9BUN8;E5RGY0	Derlin-1	DERL1	tr|B4E1G1|B4E1G1_HUMAN Derlin-1 OS=Homo sapiens GN=DERL1 PE=1 SV=1;sp|Q9BUN8-2|DERL1_HUMAN Isoform 2 of Derlin-1 OS=Homo sapiens GN=DERL1;sp|Q9BUN8|DERL1_HUMAN Derlin-1 OS=Homo sapiens GN=DERL1 PE=1 SV=1;tr|E5RGY0|E5RGY0_HUMAN Derlin-1 OS=Homo sapiens GN=D	182180000	235600000	46420000	20242000	26178000	207320000	93684000	3	3	3	21.9	21.9	21.9	17.033	0	53.128	417780000	31	21.9	21.9	14	17	4	3	3	3	3	3	3
274	H0YKQ5;H7BYN4;B4E1K0;Q02241-2;Q02241;H0YME6	H0YKQ5;H7BYN4;B4E1K0;Q02241-2;Q02241	Kinesin-like protein;Kinesin-like protein KIF23	KIF23	tr|H0YKQ5|H0YKQ5_HUMAN Kinesin-like protein KIF23 (Fragment) OS=Homo sapiens GN=KIF23 PE=1 SV=1;tr|H7BYN4|H7BYN4_HUMAN Kinesin-like protein KIF23 OS=Homo sapiens GN=KIF23 PE=1 SV=1;tr|B4E1K0|B4E1K0_HUMAN Kinesin-like protein KIF23 OS=Homo sapiens GN=KIF23	16934000	20066000	2466700	1128900	1337800	13310000	0	3	3	3	9.4	9.4	9.4	30.701	0.00080645	3.4349	37000000	3	7.1	2.2	2	1	6	2	1	2	1	2	1
275	B4E1Z4;E7ETN3;H7C526;H7C5H1;P00751	B4E1Z4;E7ETN3			tr|B4E1Z4|B4E1Z4_HUMAN Uncharacterized protein OS=Homo sapiens PE=2 SV=1;tr|E7ETN3|E7ETN3_HUMAN Uncharacterized protein OS=Homo sapiens PE=3 SV=1	3320100	0	43118	43118	0	3260900	0	3	1	1	3.4	1.3	1.3	140.94	0.00055142	3.7807	3320100	4	2.3	2.4	1	3	5	2	2	1	1	1	1
276	B4E2E0;O43237-2;O43237	B4E2E0;O43237-2;O43237	Cytoplasmic dynein 1 light intermediate chain 2	DYNC1LI2	tr|B4E2E0|B4E2E0_HUMAN Cytoplasmic dynein 1 light intermediate chain 2 OS=Homo sapiens GN=DYNC1LI2 PE=1 SV=1;sp|O43237-2|DC1L2_HUMAN Isoform 2 of Cytoplasmic dynein 1 light intermediate chain 2 OS=Homo sapiens GN=DYNC1LI2;sp|O43237|DC1L2_HUMAN Cytoplasmic	0	0	0	0	0	0	0	1	1	1	5.5	5.5	5.5	30.563	0.0041504	2.3591	0	1	5.5	0	1	0	3	1	0	1	0	1	0
277	B5MBX0;Q96FF9;H0YCL8	B5MBX0;Q96FF9	Sororin	CDCA5	tr|B5MBX0|B5MBX0_HUMAN Sororin OS=Homo sapiens GN=CDCA5 PE=1 SV=1;sp|Q96FF9|CDCA5_HUMAN Sororin OS=Homo sapiens GN=CDCA5 PE=1 SV=1	40279000	53308000	4925600	2119900	2805700	40819000	53863000	4	4	4	22.1	22.1	22.1	33.734	0	9.3167	93587000	7	16.9	22.1	2	5	3	3	4	3	4	3	4
278	B5MBZ8;C9JD73;C9J177;H7C003;Q15435-5;Q15435-4;Q15435-3;Q15435-2;Q15435	B5MBZ8;C9JD73;C9J177;H7C003;Q15435-5;Q15435-4;Q15435-3;Q15435-2;Q15435	Protein phosphatase 1 regulatory subunit 7	PPP1R7	tr|B5MBZ8|B5MBZ8_HUMAN Protein phosphatase 1 regulatory subunit 7 OS=Homo sapiens GN=PPP1R7 PE=1 SV=1;tr|C9JD73|C9JD73_HUMAN Protein phosphatase 1 regulatory subunit 7 (Fragment) OS=Homo sapiens GN=PPP1R7 PE=1 SV=1;tr|C9J177|C9J177_HUMAN Protein phosphatas	44594000	19658000	4015700	2787100	1228600	74866000	20727000	2	2	2	13.5	13.5	13.5	31.357	0.00031546	6.5304	64252000	4	13.5	13.5	2	2	9	2	2	2	2	2	2
279	B5MC02;Q8NFT2-3;Q8NFT2-2;Q8NFT2	B5MC02;Q8NFT2-3;Q8NFT2-2;Q8NFT2	Metalloreductase STEAP2	STEAP2	tr|B5MC02|B5MC02_HUMAN Metalloreductase STEAP2 OS=Homo sapiens GN=STEAP2 PE=4 SV=1;sp|Q8NFT2-3|STEA2_HUMAN Isoform 3 of Metalloreductase STEAP2 OS=Homo sapiens GN=STEAP2;sp|Q8NFT2-2|STEA2_HUMAN Isoform 2 of Metalloreductase STEAP2 OS=Homo sapiens GN=STEAP2	7781100	0	311240	311240	0	4940200	0	1	1	1	4	4	4	45.983	0.0015011	2.692	7781100	1	4	0	1	0	4	1	0	1	0	1	0
280	B5MC22;Q9UDX5;H7C417;F8WEN7;Q9UDX5-2	B5MC22;Q9UDX5;H7C417	Mitochondrial fission process protein 1	MTFP1	tr|B5MC22|B5MC22_HUMAN Mitochondrial fission process protein 1 OS=Homo sapiens GN=MTFP1 PE=1 SV=1;sp|Q9UDX5|MTFP1_HUMAN Mitochondrial fission process protein 1 OS=Homo sapiens GN=MTFP1 PE=1 SV=1;tr|H7C417|H7C417_HUMAN Uncharacterized protein (Fragment) OS=	89158000	116340000	22833000	9906400	12927000	75208000	72701000	4	4	4	40.6	40.6	40.6	15.556	0	16.269	205500000	11	40.6	40.6	4	7	5	4	4	4	4	4	4
281	B5MC53;B5MCF8;P39210;C9J473;H0Y6M5;E7EX18;G5E9F5;A8MPV4	B5MC53;B5MCF8;P39210;C9J473;H0Y6M5;E7EX18	Protein Mpv17	MPV17	tr|B5MC53|B5MC53_HUMAN MpV17 transgene, murine homolog, glomerulosclerosis, isoform CRA_f OS=Homo sapiens GN=MPV17 PE=4 SV=1;tr|B5MCF8|B5MCF8_HUMAN Protein Mpv17 OS=Homo sapiens GN=MPV17 PE=4 SV=1;sp|P39210|MPV17_HUMAN Protein Mpv17 OS=Homo sapiens GN=MPV1	317250000	137700000	75824000	52875000	22949000	214160000	145450000	3	3	3	30	30	30	18.628	0	45.192	454940000	17	17.6	30	7	10	8	2	3	2	3	2	3
282	B5MC59;P35244	B5MC59;P35244	Replication protein A 14 kDa subunit	RPA3	tr|B5MC59|B5MC59_HUMAN Replication protein A 14 kDa subunit OS=Homo sapiens GN=RPA3 PE=1 SV=1;sp|P35244|RFA3_HUMAN Replication protein A 14 kDa subunit OS=Homo sapiens GN=RPA3 PE=1 SV=1	68892000	64870000	26752000	13778000	12974000	83709000	66009000	1	1	1	20.7	20.7	20.7	9.1703	0	10.383	133760000	7	20.7	20.7	2	5	2	1	1	1	1	1	1
283	B5MCA4;P16422;C9JKY3	B5MCA4;P16422;C9JKY3	Epithelial cell adhesion molecule	EPCAM	tr|B5MCA4|B5MCA4_HUMAN Epithelial cell adhesion molecule OS=Homo sapiens GN=EPCAM PE=1 SV=1;sp|P16422|EPCAM_HUMAN Epithelial cell adhesion molecule OS=Homo sapiens GN=EPCAM PE=1 SV=2;tr|C9JKY3|C9JKY3_HUMAN Epithelial cell adhesion molecule (Fragment) OS=Ho	135660000	181230000	16679000	7140200	9538400	148560000	200650000	3	3	3	12	12	12	37.893	0	111.71	316890000	13	12	12	5	8	3	3	3	3	3	3	3
284	B5MCF9;O00541-2;O00541;B3KXD6;H7C267;Q674R7	B5MCF9;O00541-2;O00541;B3KXD6	Pescadillo homolog	PES1	tr|B5MCF9|B5MCF9_HUMAN Pescadillo homolog OS=Homo sapiens GN=PES1 PE=1 SV=1;sp|O00541-2|PESC_HUMAN Isoform 2 of Pescadillo homolog OS=Homo sapiens GN=PES1;sp|O00541|PESC_HUMAN Pescadillo homolog OS=Homo sapiens GN=PES1 PE=1 SV=1;tr|B3KXD6|B3KXD6_HUMAN Pesc	2280000000	2679200000	134030000	61622000	72410000	2644000000	2822200000	20	20	20	37	37	37	66.077	0	207.08	4959200000	142	35.4	32.9	62	80	6	19	18	19	18	19	18
285	B5MCR8;Q6NXT4-4;Q6NXT4-3;Q6NXT4;Q6NXT4-2	B5MCR8;Q6NXT4-4;Q6NXT4-3;Q6NXT4;Q6NXT4-2	Zinc transporter 6	SLC30A6	tr|B5MCR8|B5MCR8_HUMAN Solute carrier family 30 (Zinc transporter), member 6, isoform CRA_b OS=Homo sapiens GN=SLC30A6 PE=1 SV=1;sp|Q6NXT4-4|ZNT6_HUMAN Isoform 4 of Zinc transporter 6 OS=Homo sapiens GN=SLC30A6;sp|Q6NXT4-3|ZNT6_HUMAN Isoform 3 of Zinc tran	164430000	10699000	9729100	9134800	594360	193590000	34346000	2	2	2	11.6	11.6	11.6	42.509	0.00030637	5.7479	175120000	6	11.6	4.1	5	1	5	2	1	2	1	2	1
286	B5MCX3;Q15019;Q15019-3;Q15019-2;C9J2Q4;C9IY94;C9IZU3;C9JQJ4;C9J938;H7C310;C9JB25;B5MD47;H7C2Y0;C9JFT1;F8WB65;C9JZI2	B5MCX3;Q15019;Q15019-3;Q15019-2;C9J2Q4;C9IY94;C9IZU3;C9JQJ4;C9J938;H7C310;C9JB25	Septin-2	2002-09-01	tr|B5MCX3|B5MCX3_HUMAN Septin-2 OS=Homo sapiens GN=SEPT2 PE=1 SV=1;sp|Q15019|SEPT2_HUMAN Septin-2 OS=Homo sapiens GN=SEPT2 PE=1 SV=1;sp|Q15019-3|SEPT2_HUMAN Isoform 3 of Septin-2 OS=Homo sapiens GN=SEPT2;sp|Q15019-2|SEPT2_HUMAN Isoform 2 of Septin-2 OS=Hom	293110000	106390000	19024000	13957000	5066200	258740000	150810000	6	6	6	29	29	29	36.94	0	51.183	399500000	21	21.8	26.2	13	8	16	5	5	5	5	5	5
287	B5MDE0;Q96AA3;C9JP01	B5MDE0;Q96AA3	Protein RFT1 homolog	RFT1	tr|B5MDE0|B5MDE0_HUMAN Protein RFT1 homolog OS=Homo sapiens GN=RFT1 PE=4 SV=1;sp|Q96AA3|RFT1_HUMAN Protein RFT1 homolog OS=Homo sapiens GN=RFT1 PE=1 SV=1	255460000	129820000	17513000	11612000	5900900	229090000	139890000	3	3	3	6.8	6.8	6.8	55.835	0	12.805	385280000	12	6.8	6.8	6	6	3	3	3	3	3	3	3
288	B5MDF5;P62826;J3KQE5;F5H018;B4DV51;H0YFC6;A0A087X0W0	B5MDF5;P62826;J3KQE5;F5H018;B4DV51	GTP-binding nuclear protein Ran	RAN	tr|B5MDF5|B5MDF5_HUMAN GTP-binding nuclear protein Ran OS=Homo sapiens GN=RAN PE=1 SV=1;sp|P62826|RAN_HUMAN GTP-binding nuclear protein Ran OS=Homo sapiens GN=RAN PE=1 SV=3;tr|J3KQE5|J3KQE5_HUMAN GTP-binding nuclear protein Ran (Fragment) OS=Homo sapiens G	2719000000	2127300000	440580000	247180000	193400000	1943600000	2707100000	10	10	10	43.8	43.8	43.8	26.224	0	141.13	4846400000	97	43.3	43.8	51	46	7	9	10	9	10	9	10
289	B5MDU6;Q9H6V9;Q9H6V9-2;C9JUM0;Q9H6V9-3;C9JHU6;B5MCU4;Q9H6V9-4;B5MCE2;D3YTH1;B4DRG3	B5MDU6;Q9H6V9;Q9H6V9-2;C9JUM0;Q9H6V9-3;C9JHU6;B5MCU4;Q9H6V9-4	UPF0554 protein C2orf43	LDAH;C2orf43	tr|B5MDU6|B5MDU6_HUMAN UPF0554 protein C2orf43 OS=Homo sapiens GN=C2orf43 PE=1 SV=1;sp|Q9H6V9|CB043_HUMAN UPF0554 protein C2orf43 OS=Homo sapiens GN=C2orf43 PE=1 SV=1;sp|Q9H6V9-2|CB043_HUMAN Isoform 2 of UPF0554 protein C2orf43 OS=Homo sapiens GN=C2orf43;t	468570000	220010000	29938000	20372000	9565600	394310000	244740000	5	5	5	11.1	11.1	11.1	42.668	0	14.358	688580000	19	11.1	10.8	12	7	11	5	4	5	4	5	4
290	Q99613-2;Q99613;B5ME19;H3BPE4;H3BPE3;H3BTY8	Q99613-2;Q99613;B5ME19	Eukaryotic translation initiation factor 3 subunit C;Eukaryotic translation initiation factor 3 subunit C-like protein	EIF3C;EIF3CL	sp|Q99613-2|EIF3C_HUMAN Isoform 2 of Eukaryotic translation initiation factor 3 subunit C OS=Homo sapiens GN=EIF3C;sp|Q99613|EIF3C_HUMAN Eukaryotic translation initiation factor 3 subunit C OS=Homo sapiens GN=EIF3C PE=1 SV=1;sp|B5ME19|EIFCL_HUMAN Eukaryoti	459750000	327120000	17106000	9994600	7111300	418780000	298290000	16	16	16	18.9	18.9	18.9	104.1	0	51.899	786870000	40	15.9	11.6	24	16	6	12	10	12	10	12	10
291	B6VEX4;Q8IZP0-10;Q8IZP0-8;Q8IZP0-7;Q8IZP0-2;Q8IZP0-4;Q8IZP0-3;Q8IZP0-5;Q8IZP0-6;Q8IZP0-9;Q8IZP0-12;Q8IZP0;Q8IZP0-11	B6VEX4;Q8IZP0-10;Q8IZP0-8;Q8IZP0-7;Q8IZP0-2;Q8IZP0-4;Q8IZP0-3;Q8IZP0-5;Q8IZP0-6;Q8IZP0-9;Q8IZP0-12;Q8IZP0;Q8IZP0-11	Abl interactor 1	ABI1	tr|B6VEX4|B6VEX4_HUMAN Abl interactor 1 OS=Homo sapiens GN=ABI1 PE=1 SV=1;sp|Q8IZP0-10|ABI1_HUMAN Isoform 10 of Abl interactor 1 OS=Homo sapiens GN=ABI1;sp|Q8IZP0-8|ABI1_HUMAN Isoform 8 of Abl interactor 1 OS=Homo sapiens GN=ABI1;sp|Q8IZP0-7|ABI1_HUMAN Iso	15629000	0	744220	744220	0	19928000	0	2	2	2	6.9	6.9	6.9	43.294	0.00054245	3.5689	15629000	2	6.9	0	2	0	13	2	0	2	0	2	0
292	B7WP74;Q9HCG8	B7WP74;Q9HCG8	Pre-mRNA-splicing factor CWC22 homolog	CWC22	tr|B7WP74|B7WP74_HUMAN Pre-mRNA-splicing factor CWC22 homolog (Fragment) OS=Homo sapiens GN=CWC22 PE=1 SV=1;sp|Q9HCG8|CWC22_HUMAN Pre-mRNA-splicing factor CWC22 homolog OS=Homo sapiens GN=CWC22 PE=1 SV=3	51739000	49870000	2309300	1175900	1133400	57191000	52444000	3	3	3	5.4	5.4	5.4	85.576	0	12.377	101610000	8	4	3.5	3	5	2	2	2	2	2	2	2
293	B7WPG3;C9IYN3;D6W592;Q8WVV9-5;Q8WVV9-4;Q8WVV9;H7C464;H7BXH8;Q8WVV9-3;Q8WVV9-2;C9JJZ7	B7WPG3;C9IYN3;D6W592;Q8WVV9-5;Q8WVV9-4;Q8WVV9	Heterogeneous nuclear ribonucleoprotein L-like	HNRNPLL;HNRPLL	tr|B7WPG3|B7WPG3_HUMAN Uncharacterized protein OS=Homo sapiens GN=HNRPLL PE=1 SV=1;tr|C9IYN3|C9IYN3_HUMAN Heterogeneous nuclear ribonucleoprotein L-like OS=Homo sapiens GN=HNRNPLL PE=1 SV=2;tr|D6W592|D6W592_HUMAN Heterogeneous nuclear ribonucleoprotein L-l	459650000	257770000	23914000	15322000	8592400	380700000	304150000	13	12	12	39.4	39.4	39.4	56.45	0	53.597	717420000	36	28.1	29.5	12	24	11	8	11	8	10	8	10
294	B7Z2R7;Q5T8D3-2;Q5T8D3-3;Q5T8D3;Q5T8D3-4;X6RDD7;Q5T8E0;A0A087X0B8;K7EM05;Q8NC06;Q8NC06-2;Q8NC06-3	B7Z2R7;Q5T8D3-2;Q5T8D3-3;Q5T8D3;Q5T8D3-4;X6RDD7;Q5T8E0	Acyl-CoA-binding domain-containing protein 5	ACBD5	tr|B7Z2R7|B7Z2R7_HUMAN Acyl-CoA-binding domain-containing protein 5 OS=Homo sapiens GN=ACBD5 PE=1 SV=1;sp|Q5T8D3-2|ACBD5_HUMAN Isoform 2 of Acyl-CoA-binding domain-containing protein 5 OS=Homo sapiens GN=ACBD5;sp|Q5T8D3-3|ACBD5_HUMAN Isoform 3 of Acyl-CoA-	142170000	64959000	6681500	4586000	2095400	111730000	90226000	7	7	7	16.3	16.3	16.3	58.792	0	32.051	207130000	15	13.8	9.9	8	7	12	6	4	6	4	6	4
295	B7Z3R2;Q9ULQ1;Q9ULQ1-3	B7Z3R2;Q9ULQ1;Q9ULQ1-3	Two pore calcium channel protein 1	TPCN1	tr|B7Z3R2|B7Z3R2_HUMAN Two pore calcium channel protein 1 OS=Homo sapiens GN=TPCN1 PE=2 SV=1;sp|Q9ULQ1|TPC1_HUMAN Two pore calcium channel protein 1 OS=Homo sapiens GN=TPCN1 PE=1 SV=3;sp|Q9ULQ1-3|TPC1_HUMAN Isoform 3 of Two pore calcium channel protein 1 O	13607000	7923600	633240	400200	233050	9448200	8609500	1	1	1	2.3	2.3	2.3	87.317	0.0012563	2.7198	21530000	4	2.3	2.3	2	2	3	1	1	1	1	1	1
296	B7Z4B8;Q9BUJ2-4;Q9BUJ2-2;Q9BUJ2;Q9BUJ2-3;M0R3F1;M0QYZ0;M0QYI8;M0R0K8;M0R203;M0QYM5;M0QZV6;Q9BUJ2-5	B7Z4B8;Q9BUJ2-4;Q9BUJ2-2;Q9BUJ2;Q9BUJ2-3;M0R3F1;M0QYZ0	Heterogeneous nuclear ribonucleoprotein U-like protein 1	HNRNPUL1	tr|B7Z4B8|B7Z4B8_HUMAN Heterogeneous nuclear ribonucleoprotein U-like protein 1 OS=Homo sapiens GN=HNRNPUL1 PE=1 SV=1;sp|Q9BUJ2-4|HNRL1_HUMAN Isoform 4 of Heterogeneous nuclear ribonucleoprotein U-like protein 1 OS=Homo sapiens GN=HNRNPUL1;sp|Q9BUJ2-2|HNRL	1477100000	1319500000	62148000	32825000	29322000	1293900000	1446200000	19	18	18	37.2	36.4	36.4	86.121	0	176.13	2796700000	84	33.6	31.7	41	43	13	16	16	15	15	15	15
297	H7C2W9;C9JU56;B7Z4E3;B7Z4C8;P62899-3;P62899;P62899-2;B8ZZK4	H7C2W9;C9JU56;B7Z4E3;B7Z4C8;P62899-3;P62899;P62899-2;B8ZZK4	60S ribosomal protein L31	RPL31	tr|H7C2W9|H7C2W9_HUMAN 60S ribosomal protein L31 (Fragment) OS=Homo sapiens GN=RPL31 PE=1 SV=1;tr|C9JU56|C9JU56_HUMAN 60S ribosomal protein L31 (Fragment) OS=Homo sapiens GN=RPL31 PE=1 SV=1;tr|B7Z4E3|B7Z4E3_HUMAN 60S ribosomal protein L31 OS=Homo sapiens G	2254600000	1878100000	688780000	375760000	313020000	1592000000	1982000000	4	4	4	35.2	35.2	35.2	12.701	0	11.764	4132700000	78	35.2	35.2	42	36	8	4	4	4	4	4	4
298	E7EPW5;G3XAH9;E9PCV1;B7Z4U3;B7Z4L1;E7EPD9;H7BXS2;Q9NRC1-6;Q9NRC1-5;Q9NRC1-4;Q9NRC1-3;Q9NRC1-2;E7ENZ9;C9JU30;Q8TDW4-8;Q9NRC1-7;Q8TDW4-6;Q8TDW4-2;Q8TDW4-7;Q8TDW4-5;Q8TDW4-3;Q8TDW4;Q9NRC1;C9JZV9;C9JRQ0;Q5TEH7;C9JRW1;H0Y7M0;Q8TDW4-4	E7EPW5;G3XAH9;E9PCV1;B7Z4U3;B7Z4L1;E7EPD9;H7BXS2;Q9NRC1-6;Q9NRC1-5;Q9NRC1-4;Q9NRC1-3;Q9NRC1-2;E7ENZ9;C9JU30;Q8TDW4-8;Q9NRC1-7;Q8TDW4-6;Q8TDW4-2;Q8TDW4-7;Q8TDW4-5;Q8TDW4-3;Q8TDW4;Q9NRC1	Suppressor of tumorigenicity 7 protein;Suppressor of tumorigenicity 7 protein-like	ST7;ST7L	tr|E7EPW5|E7EPW5_HUMAN Suppressor of tumorigenicity 7 protein OS=Homo sapiens GN=ST7 PE=1 SV=1;tr|G3XAH9|G3XAH9_HUMAN Suppression of tumorigenicity 7, isoform CRA_b OS=Homo sapiens GN=ST7 PE=1 SV=1;tr|E9PCV1|E9PCV1_HUMAN Suppressor of tumorigenicity 7 prot	19738000	63521000	2973500	704910	2268600	9068300	81998000	3	3	3	6.3	6.3	6.3	58.067	0.00057176	4.3322	83259000	4	6.3	2	3	1	29	3	1	3	1	3	1
299	B7Z524;H0YDX7;J3QT46;Q9Y450-4;Q9Y450;E9PS53;H0YES5;E9PHZ9	B7Z524;H0YDX7;J3QT46;Q9Y450-4;Q9Y450;E9PS53;H0YES5;E9PHZ9	HBS1-like protein	HBS1L	tr|B7Z524|B7Z524_HUMAN HBS1-like protein OS=Homo sapiens GN=HBS1L PE=1 SV=1;tr|H0YDX7|H0YDX7_HUMAN HBS1-like protein (Fragment) OS=Homo sapiens GN=HBS1L PE=1 SV=1;tr|J3QT46|J3QT46_HUMAN HBS1-like protein OS=Homo sapiens GN=HBS1L PE=1 SV=1;sp|Q9Y450-4|HBS1L	28967000	19588000	1387300	827640	559660	23421000	23044000	4	4	4	15	15	15	56.961	0	11.411	48555000	7	7.5	10.6	2	5	8	2	3	2	3	2	3
300	F5H7S3;H7BYY1;B7Z596;H0YKX5;P09493-8;P09493-4;P09493-3;P09493-10;H0YK48;P09493-2;P09493-5;H0YNC7;H0YL52;Q6ZN40;P09493-9;P09493-7;P09493-6;P09493;H0YL80;H0YK20;H0YL42;H0YN06	F5H7S3;H7BYY1;B7Z596;H0YKX5;P09493-8;P09493-4;P09493-3;P09493-10;H0YK48;P09493-2;P09493-5;H0YNC7;H0YL52;Q6ZN40;P09493-9;P09493-7;P09493-6;P09493;H0YL80	Tropomyosin alpha-1 chain	TPM1	tr|F5H7S3|F5H7S3_HUMAN Tropomyosin alpha-1 chain OS=Homo sapiens GN=TPM1 PE=1 SV=2;tr|H7BYY1|H7BYY1_HUMAN Tropomyosin 1 (Alpha), isoform CRA_m OS=Homo sapiens GN=TPM1 PE=1 SV=1;tr|B7Z596|B7Z596_HUMAN Tropomyosin alpha-1 chain OS=Homo sapiens GN=TPM1 PE=1 S	142540000	161860000	13837000	6479200	7357500	141290000	136290000	9	5	5	31.4	22.4	22.4	28.524	0	12.133	304410000	6	22	28.6	3	3	22	7	8	4	4	4	4
301	B7Z6D5;Q96GQ7;A0A087X059;A0A087WYH5	B7Z6D5;Q96GQ7	Probable ATP-dependent RNA helicase DDX27	DDX27	tr|B7Z6D5|B7Z6D5_HUMAN Probable ATP-dependent RNA helicase DDX27 OS=Homo sapiens GN=DDX27 PE=1 SV=1;sp|Q96GQ7|DDX27_HUMAN Probable ATP-dependent RNA helicase DDX27 OS=Homo sapiens GN=DDX27 PE=1 SV=2	2468300000	2297100000	113460000	58768000	54693000	2241800000	2613100000	21	21	21	31.2	31.2	31.2	86.604	0	152.11	4765400000	94	26.8	26.9	42	52	4	19	17	19	17	19	17
302	B7Z7P8;P62495-2;P62495;D6RJE8;I3L492;D6RCB3	B7Z7P8;P62495-2;P62495;D6RJE8;I3L492	Eukaryotic peptide chain release factor subunit 1	ETF1	tr|B7Z7P8|B7Z7P8_HUMAN Eukaryotic peptide chain release factor subunit 1 OS=Homo sapiens GN=ETF1 PE=1 SV=1;sp|P62495-2|ERF1_HUMAN Isoform 2 of Eukaryotic peptide chain release factor subunit 1 OS=Homo sapiens GN=ETF1;sp|P62495|ERF1_HUMAN Eukaryotic peptide	82830000	66300000	5965200	3313200	2652000	65092000	73403000	5	5	5	16.3	16.3	16.3	47.475	0	7.8768	149130000	7	12.8	9	5	2	6	4	3	4	3	4	3
303	B7Z8R2;Q8WV60;E5RHU2;D6RIZ0;Q8WV60-3	B7Z8R2;Q8WV60;E5RHU2;D6RIZ0;Q8WV60-3	Pentatricopeptide repeat-containing protein 2, mitochondrial	PTCD2	tr|B7Z8R2|B7Z8R2_HUMAN Pentatricopeptide repeat-containing protein 2, mitochondrial OS=Homo sapiens GN=PTCD2 PE=2 SV=1;sp|Q8WV60|PTCD2_HUMAN Pentatricopeptide repeat-containing protein 2, mitochondrial OS=Homo sapiens GN=PTCD2 PE=2 SV=3;tr|E5RHU2|E5RHU2_HU	10653000	0	887770	887770	0	8860200	0	2	2	2	11.2	11.2	11.2	18.349	0.0082821	2.0012	10653000	2	11.2	0	2	0	5	2	0	2	0	2	0
304	B7Z9I1;Q5T4U5;P11310;P11310-2;E9PJM9;H0YDT5;E9PRX4	B7Z9I1;Q5T4U5;P11310;P11310-2	Medium-chain specific acyl-CoA dehydrogenase, mitochondrial	ACADM	tr|B7Z9I1|B7Z9I1_HUMAN Medium-chain-specific acyl-CoA dehydrogenase, mitochondrial OS=Homo sapiens GN=ACADM PE=1 SV=1;tr|Q5T4U5|Q5T4U5_HUMAN Acyl-Coenzyme A dehydrogenase, C-4 to C-12 straight chain, isoform CRA_a OS=Homo sapiens GN=ACADM PE=1 SV=1;sp|P113	1440300000	1232800000	133650000	72015000	61638000	1389300000	1173000000	13	13	13	45.2	45.2	45.2	42.426	0	156.55	2673100000	84	37.1	34	45	39	7	12	11	12	11	12	11
305	B7ZKM0;Q15020;F8VV04;Q15020-2;F8VVK9;F8VZM2;F8W667;H0YHU8	B7ZKM0;Q15020;F8VV04;Q15020-2	Squamous cell carcinoma antigen recognized by T-cells 3	SART3	tr|B7ZKM0|B7ZKM0_HUMAN SART3 protein OS=Homo sapiens GN=SART3 PE=1 SV=1;sp|Q15020|SART3_HUMAN Squamous cell carcinoma antigen recognized by T-cells 3 OS=Homo sapiens GN=SART3 PE=1 SV=1;tr|F8VV04|F8VV04_HUMAN Squamous cell carcinoma antigen recognized by T-	86920000	86433000	3041300	1524900	1516400	124600000	106690000	8	8	8	11	11	11	105.58	0	19.053	173350000	14	8.8	5.7	9	5	8	7	4	7	4	7	4
306	B7ZKQ9;Q8WTV0-4;Q8WTV0-2;Q8WTV0-3;Q8WTV0-5;Q8WTV0;F5H4X0;F5H5E8	B7ZKQ9;Q8WTV0-4;Q8WTV0-2;Q8WTV0-3;Q8WTV0-5;Q8WTV0;F5H4X0	Scavenger receptor class B member 1	SCARB1	tr|B7ZKQ9|B7ZKQ9_HUMAN SCARB1 protein OS=Homo sapiens GN=SCARB1 PE=1 SV=1;sp|Q8WTV0-4|SCRB1_HUMAN Isoform 4 of Scavenger receptor class B member 1 OS=Homo sapiens GN=SCARB1;sp|Q8WTV0-2|SCRB1_HUMAN Isoform 1 of Scavenger receptor class B member 1 OS=Homo sa	1010600000	489490000	68185000	45936000	22249000	718840000	569920000	11	11	11	21.8	21.8	21.8	53.847	0	39.652	1500100000	40	19.8	20	18	22	8	9	10	9	10	9	10
307	J3QR29;J3QKR5;B7ZVY7;J3QR44;P21127-12;P21127-4;P21127-5;P21127-10;P21127-6;P21127-9;P21127-8;P21127-3;P21127-2;P21127;Q5QPR4;Q5QPR3;Q9UQ88-10;Q9UQ88-4;Q9UQ88-3;Q9UQ88-2;Q9UQ88;Q9UQ88-5;Q9UQ88-9;Q9UQ88-8	J3QR29;J3QKR5;B7ZVY7;J3QR44;P21127-12;P21127-4;P21127-5;P21127-10;P21127-6;P21127-9;P21127-8;P21127-3;P21127-2;P21127;Q5QPR4;Q5QPR3;Q9UQ88-10;Q9UQ88-4;Q9UQ88-3;Q9UQ88-2;Q9UQ88;Q9UQ88-5;Q9UQ88-9	Cyclin-dependent kinase 11B;Cyclin-dependent kinase 11A	CDK11B;CDC2L1;CDK11A	tr|J3QR29|J3QR29_HUMAN Cyclin-dependent kinase 11B OS=Homo sapiens GN=CDK11B PE=1 SV=2;tr|J3QKR5|J3QKR5_HUMAN Cyclin-dependent kinase 11B OS=Homo sapiens GN=CDK11B PE=1 SV=2;tr|B7ZVY7|B7ZVY7_HUMAN Cell division cycle 2-like 1 (PITSLRE proteins) OS=Homo sap	138820000	37088000	3997900	3155000	842920	101720000	77357000	8	8	8	12.3	12.3	12.3	87.109	0	12.303	175910000	12	12.3	3.1	11	1	24	8	2	8	2	8	2
308	B8ZZC7;B8ZZ31;E7ERP4;Q9BRB3-3;Q9BRB3-2;Q9BRB3	B8ZZC7;B8ZZ31;E7ERP4;Q9BRB3-3;Q9BRB3-2;Q9BRB3	Phosphatidylinositol N-acetylglucosaminyltransferase subunit Q	PIGQ	tr|B8ZZC7|B8ZZC7_HUMAN Phosphatidylinositol N-acetylglucosaminyltransferase subunit Q (Fragment) OS=Homo sapiens GN=PIGQ PE=4 SV=1;tr|B8ZZ31|B8ZZ31_HUMAN Phosphatidylinositol N-acetylglucosaminyltransferase subunit Q (Fragment) OS=Homo sapiens GN=PIGQ PE=4	0	7695800	480990	0	480990	0	12368000	1	1	1	8.4	8.4	8.4	27.467	0.00078823	3.1985	7695800	2	8.4	8.4	1	1	6	1	1	1	1	1	1
309	B8ZZ67;B8ZZN6;P63165-2;P63165	B8ZZ67;B8ZZN6;P63165-2;P63165	Small ubiquitin-related modifier 1	SUMO1	tr|B8ZZ67|B8ZZ67_HUMAN SMT3 suppressor of mif two 3 homolog 1 (Yeast), isoform CRA_b OS=Homo sapiens GN=SUMO1 PE=1 SV=1;tr|B8ZZN6|B8ZZN6_HUMAN Small ubiquitin-related modifier 1 OS=Homo sapiens GN=SUMO1 PE=1 SV=1;sp|P63165-2|SUMO1_HUMAN Isoform 2 of Small	150420000	60379000	35134000	25071000	10063000	148280000	49412000	2	2	2	25.8	25.8	25.8	7.166	0.00079512	3.2786	210800000	8	25.8	25.8	5	3	4	2	2	2	2	2	2
310	B8ZZ99;Q96NT0;F8WCZ3;Q96NT0-2	B8ZZ99;Q96NT0;F8WCZ3;Q96NT0-2	Coiled-coil domain-containing protein 115	CCDC115	tr|B8ZZ99|B8ZZ99_HUMAN Coiled-coil domain-containing protein 115 OS=Homo sapiens GN=CCDC115 PE=4 SV=1;sp|Q96NT0|CC115_HUMAN Coiled-coil domain-containing protein 115 OS=Homo sapiens GN=CCDC115 PE=1 SV=1;tr|F8WCZ3|F8WCZ3_HUMAN Coiled-coil domain-containing	36595000	0	3659500	3659500	0	31779000	0	3	3	3	39.4	39.4	39.4	19.056	0.00031576	6.5539	36595000	4	39.4	0	4	0	4	3	0	3	0	3	0
311	B8ZZA2;B8ZZJ1;H7C0W7;Q9BYI3	B8ZZA2;B8ZZJ1;H7C0W7;Q9BYI3	Hyccin	FAM126A	tr|B8ZZA2|B8ZZA2_HUMAN Hyccin OS=Homo sapiens GN=FAM126A PE=4 SV=1;tr|B8ZZJ1|B8ZZJ1_HUMAN Uncharacterized protein OS=Homo sapiens GN=FAM126A PE=4 SV=1;tr|H7C0W7|H7C0W7_HUMAN Hyccin (Fragment) OS=Homo sapiens GN=FAM126A PE=4 SV=1;sp|Q9BYI3|HYCCI_HUMAN Hycci	16410000	29746000	6593700	2344300	4249400	20653000	29477000	1	1	1	19.3	19.3	19.3	13.01	0.0005596	4.0449	46156000	3	19.3	19.3	2	1	4	1	1	1	1	1	1
312	B8ZZF8;Q9Y4Y9	B8ZZF8;Q9Y4Y9	U6 snRNA-associated Sm-like protein LSm5	LSM5	tr|B8ZZF8|B8ZZF8_HUMAN U6 snRNA-associated Sm-like protein LSm5 OS=Homo sapiens GN=LSM5 PE=1 SV=1;sp|Q9Y4Y9|LSM5_HUMAN U6 snRNA-associated Sm-like protein LSm5 OS=Homo sapiens GN=LSM5 PE=1 SV=3	66909000	51170000	29520000	16727000	12792000	60322000	59078000	1	1	1	29.7	29.7	29.7	7.0202	0.00029922	5.2563	118080000	12	29.7	29.7	8	4	2	1	1	1	1	1	1
313	B8ZZG1;Q9NZW5;C9J4Q3;C9JGI8;REV__Q8N884-2;REV__Q8N884;B4DZ84;D3DX48;Q14168-5;Q14168-6;Q14168-2;Q14168-3;Q14168;Q14168-4	B8ZZG1;Q9NZW5	MAGUK p55 subfamily member 6	MPP6	tr|B8ZZG1|B8ZZG1_HUMAN MAGUK p55 subfamily member 6 OS=Homo sapiens GN=MPP6 PE=1 SV=1;sp|Q9NZW5|MPP6_HUMAN MAGUK p55 subfamily member 6 OS=Homo sapiens GN=MPP6 PE=1 SV=2	99837000	68887000	4820700	2852500	1968200	0	76826000	9	8	8	23.4	21.7	21.7	48.757	0	10.898	168720000	7	10.7	12.6	4	3	14	5	4	4	4	4	4
314	B8ZZQ6;P06454-2;P06454;B8ZZA1;A0A087WUT1;B8ZZW7;H7C2N1	B8ZZQ6;P06454-2;P06454;B8ZZA1;A0A087WUT1;B8ZZW7;H7C2N1	Prothymosin alpha;Prothymosin alpha, N-terminally processed;Thymosin alpha-1	PTMA	tr|B8ZZQ6|B8ZZQ6_HUMAN Uncharacterized protein OS=Homo sapiens GN=PTMA PE=1 SV=1;sp|P06454-2|PTMA_HUMAN Isoform 2 of Prothymosin alpha OS=Homo sapiens GN=PTMA;sp|P06454|PTMA_HUMAN Prothymosin alpha OS=Homo sapiens GN=PTMA PE=1 SV=2;tr|B8ZZA1|B8ZZA1_HUMAN T	65685000	121500000	62395000	21895000	40500000	74773000	72685000	4	4	4	29.9	29.9	29.9	11.758	0	27.569	187180000	16	29.9	29	9	7	7	4	3	4	3	4	3
315	F5H629;B8ZZU6;E9PBF9;P15336-2;P15336-4;P15336-5;P15336	F5H629;B8ZZU6;E9PBF9;P15336-2;P15336-4;P15336-5;P15336	Cyclic AMP-dependent transcription factor ATF-2	ATF2	tr|F5H629|F5H629_HUMAN Cyclic AMP-dependent transcription factor ATF-2 OS=Homo sapiens GN=ATF2 PE=1 SV=2;tr|B8ZZU6|B8ZZU6_HUMAN Cyclic AMP-dependent transcription factor ATF-2 OS=Homo sapiens GN=ATF2 PE=1 SV=1;tr|E9PBF9|E9PBF9_HUMAN Cyclic AMP-dependent tr	18855000	22242000	3424800	1571300	1853500	11971000	27179000	1	1	1	11.6	11.6	11.6	35.019	0.0024814	2.5826	41097000	2	11.6	11.6	1	1	7	1	1	1	1	1	1
316	B8ZZU8;I3L0M9;Q15370;Q15370-2	B8ZZU8;I3L0M9;Q15370;Q15370-2	Transcription elongation factor B polypeptide 2	TCEB2	tr|B8ZZU8|B8ZZU8_HUMAN Transcription elongation factor B (SIII), polypeptide 2 (18kDa, elongin B), isoform CRA_b OS=Homo sapiens GN=TCEB2 PE=1 SV=1;tr|I3L0M9|I3L0M9_HUMAN Transcription elongation factor B polypeptide 2 (Fragment) OS=Homo sapiens GN=TCEB2 P	91033000	0	10115000	10115000	0	75636000	0	3	3	3	22.1	22.1	22.1	12.527	0	10.307	91033000	2	22.1	0	2	0	4	3	0	3	0	3	0
317	B9A054;Q8TEB9	B9A054;Q8TEB9	Rhomboid-related protein 4	RHBDD1	tr|B9A054|B9A054_HUMAN Rhomboid-related protein 4 OS=Homo sapiens GN=RHBDD1 PE=4 SV=1;sp|Q8TEB9|RHBL4_HUMAN Rhomboid-related protein 4 OS=Homo sapiens GN=RHBDD1 PE=1 SV=1	0	0	0	0	0	0	0	1	1	1	11.5	11.5	11.5	17.574	0	17.226	0	1	0	11.5	0	1	2	0	1	0	1	0	1
318	J3KMX2;B9EGA3;Q92925-3;Q92925;Q92925-2;J3QWB6;J3QQL7;F8VW95;C9JYI7;F8VZ70;F8VUB0;Q6STE5-2;Q6STE5	J3KMX2;B9EGA3;Q92925-3;Q92925;Q92925-2;J3QWB6	SWI/SNF-related matrix-associated actin-dependent regulator of chromatin subfamily D member 2	SMARCD2	tr|J3KMX2|J3KMX2_HUMAN SWI/SNF-related matrix-associated actin-dependent regulator of chromatin subfamily D member 2 OS=Homo sapiens GN=SMARCD2 PE=1 SV=1;tr|B9EGA3|B9EGA3_HUMAN SMARCD2 protein OS=Homo sapiens GN=SMARCD2 PE=1 SV=1;sp|Q92925-3|SMRD2_HUMAN Is	51674000	76323000	4128900	1666900	2462000	78364000	52735000	5	5	4	15.6	15.6	11.8	52.238	0	10.846	128000000	13	8.8	13.2	4	9	13	3	4	3	4	3	3
319	B9ZVN9;O95602	B9ZVN9;O95602	DNA-directed RNA polymerase;DNA-directed RNA polymerase I subunit RPA1	POLR1A	tr|B9ZVN9|B9ZVN9_HUMAN DNA-directed RNA polymerase OS=Homo sapiens GN=POLR1A PE=1 SV=1;sp|O95602|RPA1_HUMAN DNA-directed RNA polymerase I subunit RPA1 OS=Homo sapiens GN=POLR1A PE=1 SV=2	86403000	17247000	959720	800030	159690	76204000	23317000	9	9	9	8.1	8.1	8.1	187.81	0	14.347	103650000	10	5.5	3.6	6	4	2	6	4	6	4	6	4
320	B9ZVT1;Q8IXT5;E5RHG1;E5RJ83;E5RJV8;E5RJW8	B9ZVT1;Q8IXT5	RNA-binding protein 12B	RBM12B	tr|B9ZVT1|B9ZVT1_HUMAN RNA-binding protein 12B OS=Homo sapiens GN=RBM12B PE=1 SV=2;sp|Q8IXT5|RB12B_HUMAN RNA-binding protein 12B OS=Homo sapiens GN=RBM12B PE=1 SV=2	77389000	117190000	2948100	1172600	1775600	127510000	87004000	8	8	8	12.1	12.1	12.1	102.7	0	14.24	194580000	11	5.9	9.4	6	5	6	4	6	4	6	4	6
321	Q5VVQ1;C4P0D6;C4P0D8;Q99598	Q5VVQ1;C4P0D6;C4P0D8;Q99598	Translin-associated protein X	TSNAX;DISC1	tr|Q5VVQ1|Q5VVQ1_HUMAN Translin-associated protein X (Fragment) OS=Homo sapiens GN=TSNAX PE=4 SV=1;tr|C4P0D6|C4P0D6_HUMAN Disrupted in schizophrenia 1 isoform 49 OS=Homo sapiens GN=DISC1 PE=2 SV=1;tr|C4P0D8|C4P0D8_HUMAN Disrupted in schizophrenia 1 isoform	35537000	18330000	4897000	3230600	1666400	25183000	17585000	1	1	1	12.3	12.3	12.3	18.998	0.00080128	3.3556	53867000	2	12.3	12.3	1	1	4	1	1	1	1	1	1
322	C9IZD0;C9JA49;C9IYD3;C9JQC9;C9JPY2;C9J670;Q9NW15-2;Q9NW15-5;Q9NW15	C9IZD0;C9JA49;C9IYD3;C9JQC9;C9JPY2;C9J670;Q9NW15-2;Q9NW15-5;Q9NW15	Anoctamin-10	ANO10	tr|C9IZD0|C9IZD0_HUMAN Anoctamin-10 (Fragment) OS=Homo sapiens GN=ANO10 PE=4 SV=1;tr|C9JA49|C9JA49_HUMAN Anoctamin-10 (Fragment) OS=Homo sapiens GN=ANO10 PE=4 SV=1;tr|C9IYD3|C9IYD3_HUMAN Anoctamin-10 (Fragment) OS=Homo sapiens GN=ANO10 PE=4 SV=1;tr|C9JQC9|	44037000	20141000	12836000	8807500	4028200	51784000	0	2	2	2	26.8	26.8	26.8	12.773	0.00056465	4.1548	64178000	2	26.8	26.8	1	1	9	2	2	2	2	2	2
323	C9IYL4;P29083	C9IYL4;P29083	General transcription factor IIE subunit 1	GTF2E1	tr|C9IYL4|C9IYL4_HUMAN General transcription factor IIE subunit 1 (Fragment) OS=Homo sapiens GN=GTF2E1 PE=1 SV=1;sp|P29083|T2EA_HUMAN General transcription factor IIE subunit 1 OS=Homo sapiens GN=GTF2E1 PE=1 SV=2	10530000	8980700	2787200	1504200	1283000	11505000	14433000	1	1	1	10.1	10.1	10.1	14.437	0.00055127	3.7777	19510000	3	10.1	10.1	2	1	2	1	1	1	1	1	1
324	C9IZF4;F8WCA1;C9IZ04;Q9NY27-2;Q9NY27	C9IZF4;F8WCA1;C9IZ04;Q9NY27-2;Q9NY27	Serine/threonine-protein phosphatase 4 regulatory subunit 2	PPP4R2	tr|C9IZF4|C9IZF4_HUMAN HCG14948, isoform CRA_a OS=Homo sapiens GN=PPP4R2 PE=4 SV=1;tr|F8WCA1|F8WCA1_HUMAN Serine/threonine-protein phosphatase 4 regulatory subunit 2 OS=Homo sapiens GN=PPP4R2 PE=1 SV=1;tr|C9IZ04|C9IZ04_HUMAN Serine/threonine-protein phosph	5980100	5045200	2205100	1196000	1009000	8666000	8108400	1	1	1	21.7	21.7	21.7	7.8532	0.0008	3.3238	11025000	3	21.7	21.7	2	1	5	1	1	1	1	1	1
325	C9J0G0;Q99424;H7C4Q2;C9JY29;H7C4Y2	C9J0G0;Q99424	Acyl-coenzyme A oxidase;Peroxisomal acyl-coenzyme A oxidase 2	ACOX2	tr|C9J0G0|C9J0G0_HUMAN Acyl-coenzyme A oxidase OS=Homo sapiens GN=ACOX2 PE=3 SV=1;sp|Q99424|ACOX2_HUMAN Peroxisomal acyl-coenzyme A oxidase 2 OS=Homo sapiens GN=ACOX2 PE=1 SV=1	242810000	244270000	13164000	6562500	6601800	238800000	319410000	12	12	12	23.7	23.7	23.7	75.141	0	26.365	487080000	21	19.8	13.3	11	10	5	10	6	10	6	10	6
326	C9J0H3;C9J9P4;C9JE06;C9J7K9;O15162-2;O15162	C9J0H3;C9J9P4;C9JE06;C9J7K9;O15162-2;O15162	Phospholipid scramblase 1	PLSCR1	tr|C9J0H3|C9J0H3_HUMAN Phospholipid scramblase 1 (Fragment) OS=Homo sapiens GN=PLSCR1 PE=1 SV=1;tr|C9J9P4|C9J9P4_HUMAN Phospholipid scramblase 1 (Fragment) OS=Homo sapiens GN=PLSCR1 PE=1 SV=1;tr|C9JE06|C9JE06_HUMAN Phospholipid scramblase 1 (Fragment) OS=H	46875000	0	5859400	5859400	0	46040000	0	1	1	1	9.9	9.9	9.9	19.409	0.00078247	3.1211	46875000	2	9.9	0	2	0	6	1	0	1	0	1	0
327	C9J0J0;Q96EE4	C9J0J0;Q96EE4	Coiled-coil domain-containing protein 126	CCDC126	tr|C9J0J0|C9J0J0_HUMAN Coiled-coil domain-containing protein 126 (Fragment) OS=Homo sapiens GN=CCDC126 PE=4 SV=3;sp|Q96EE4|CC126_HUMAN Coiled-coil domain-containing protein 126 OS=Homo sapiens GN=CCDC126 PE=2 SV=2	0	8234800	1029300	0	1029300	0	11334000	1	1	1	10.8	10.8	10.8	12.768	0.0076372	2.0856	8234800	1	0	10.8	0	1	2	0	1	0	1	0	1
328	H7C184;C9J7T7;C9JE98;C9J0Q5;C9JFD3;Q9Y618-2;Q9Y618-5;Q9Y618-4;Q9Y618-3;Q9Y618	H7C184;C9J7T7;C9JE98;C9J0Q5;C9JFD3;Q9Y618-2;Q9Y618-5;Q9Y618-4;Q9Y618-3;Q9Y618	Nuclear receptor corepressor 2	NCOR2	tr|H7C184|H7C184_HUMAN Nuclear receptor corepressor 2 (Fragment) OS=Homo sapiens GN=NCOR2 PE=1 SV=1;tr|C9J7T7|C9J7T7_HUMAN Nuclear receptor corepressor 2 OS=Homo sapiens GN=NCOR2 PE=1 SV=3;tr|C9JE98|C9JE98_HUMAN Nuclear receptor corepressor 2 OS=Homo sapie	0	206350000	29478000	0	29478000	0	197960000	1	1	1	7.5	7.5	7.5	14.537	1	-2	206350000	2	0	7.5	0	2	10	0	1	0	1	0	1
329	C9J2Y9;P30876;C9J4M6	C9J2Y9;P30876;C9J4M6	DNA-directed RNA polymerase;DNA-directed RNA polymerase II subunit RPB2	POLR2B	tr|C9J2Y9|C9J2Y9_HUMAN DNA-directed RNA polymerase OS=Homo sapiens GN=POLR2B PE=1 SV=2;sp|P30876|RPB2_HUMAN DNA-directed RNA polymerase II subunit RPB2 OS=Homo sapiens GN=POLR2B PE=1 SV=1;tr|C9J4M6|C9J4M6_HUMAN DNA-directed RNA polymerase OS=Homo sapiens G	446190000	262180000	9703600	6112100	3591500	422300000	316530000	16	16	16	22	22	22	133.06	0	48.789	708360000	30	17.3	10.5	21	9	3	13	8	13	8	13	8
330	C9J3D7;Q9UKG9;Q9UKG9-3;Q9UKG9-2	C9J3D7;Q9UKG9;Q9UKG9-3	Peroxisomal carnitine O-octanoyltransferase	CROT	tr|C9J3D7|C9J3D7_HUMAN Peroxisomal carnitine O-octanoyltransferase OS=Homo sapiens GN=CROT PE=1 SV=1;sp|Q9UKG9|OCTC_HUMAN Peroxisomal carnitine O-octanoyltransferase OS=Homo sapiens GN=CROT PE=1 SV=2;sp|Q9UKG9-3|OCTC_HUMAN Isoform 3 of Peroxisomal carnitin	73947000	5131300	2259400	2112800	146610	42124000	24922000	4	4	4	10.3	10.3	10.3	65.883	0.00032082	6.9778	79078000	5	10.3	2.6	4	1	4	4	1	4	1	4	1
331	F8WDF3;C9J932;H7C5M9;C9JSA3;C9JND6;C9J6F3;C9J5C3;Q9BUL8	F8WDF3;C9J932;H7C5M9;C9JSA3;C9JND6;C9J6F3;C9J5C3;Q9BUL8	Programmed cell death protein 10	PDCD10	tr|F8WDF3|F8WDF3_HUMAN Programmed cell death protein 10 OS=Homo sapiens GN=PDCD10 PE=1 SV=1;tr|C9J932|C9J932_HUMAN Programmed cell death protein 10 (Fragment) OS=Homo sapiens GN=PDCD10 PE=1 SV=1;tr|H7C5M9|H7C5M9_HUMAN Programmed cell death protein 10 (Frag	0	22238000	7412700	0	7412700	0	29685000	1	1	1	16.9	16.9	16.9	6.7479	0.0039254	2.4263	22238000	2	0	16.9	0	2	8	0	1	0	1	0	1
332	C9JJV6;C9JZL8;C9J5M0;C9JC07;Q96S97	C9JJV6;C9JZL8;C9J5M0;C9JC07;Q96S97	Myeloid-associated differentiation marker	MYADM	tr|C9JJV6|C9JJV6_HUMAN Myeloid-associated differentiation marker (Fragment) OS=Homo sapiens GN=MYADM PE=1 SV=3;tr|C9JZL8|C9JZL8_HUMAN Myeloid-associated differentiation marker (Fragment) OS=Homo sapiens GN=MYADM PE=1 SV=1;tr|C9J5M0|C9J5M0_HUMAN Myeloid-ass	250160000	242730000	98577000	50031000	48546000	201800000	264530000	2	2	2	22.4	22.4	22.4	15.935	0	72.844	492890000	28	22.4	22.4	11	17	5	2	2	2	2	2	2
333	C9J5X1;P08069;H0YNR0;H3BSZ8;H0YMJ5	C9J5X1;P08069	Tyrosine-protein kinase receptor;Insulin-like growth factor 1 receptor;Insulin-like growth factor 1 receptor alpha chain;Insulin-like growth factor 1 receptor beta chain	IGF1R	tr|C9J5X1|C9J5X1_HUMAN Tyrosine-protein kinase receptor OS=Homo sapiens GN=IGF1R PE=1 SV=1;sp|P08069|IGF1R_HUMAN Insulin-like growth factor 1 receptor OS=Homo sapiens GN=IGF1R PE=1 SV=1	175000000	96136000	3567600	2302700	1264900	108560000	105010000	8	8	8	9.7	9.7	9.7	154.79	0	74.624	271140000	20	5.1	9.2	12	8	5	5	7	5	7	5	7
334	E9PFH4;C9J7E5;Q9Y5L0-3;Q9Y5L0;Q9Y5L0-1;Q9Y5L0-5	E9PFH4;C9J7E5;Q9Y5L0-3;Q9Y5L0;Q9Y5L0-1;Q9Y5L0-5	Transportin-3	TNPO3	tr|E9PFH4|E9PFH4_HUMAN Transportin-3 OS=Homo sapiens GN=TNPO3 PE=1 SV=1;tr|C9J7E5|C9J7E5_HUMAN Uncharacterized protein OS=Homo sapiens GN=TNPO3 PE=1 SV=1;sp|Q9Y5L0-3|TNPO3_HUMAN Isoform 3 of Transportin-3 OS=Homo sapiens GN=TNPO3;sp|Q9Y5L0|TNPO3_HUMAN Tran	42369000	4701100	1094700	985330	109330	32429000	14986000	6	6	6	10.6	10.6	10.6	96.669	0	9.5192	47070000	8	10.6	1.2	7	1	6	6	1	6	1	6	1
335	C9J7L4;Q8WWT9-3;Q8WWT9-5;Q8WWT9-6;Q8WWT9	C9J7L4;Q8WWT9-3;Q8WWT9-5;Q8WWT9-6;Q8WWT9	Solute carrier family 13 member 3	SLC13A3	tr|C9J7L4|C9J7L4_HUMAN Solute carrier family 13 member 3 (Fragment) OS=Homo sapiens GN=SLC13A3 PE=4 SV=3;sp|Q8WWT9-3|S13A3_HUMAN Isoform 3 of Solute carrier family 13 member 3 OS=Homo sapiens GN=SLC13A3;sp|Q8WWT9-5|S13A3_HUMAN Isoform 5 of Solute carrier f	43045000	19385000	4802300	3311200	1491200	28644000	23483000	1	1	1	3.2	3.2	3.2	45.875	0	16.119	62430000	2	3.2	3.2	1	1	5	1	1	1	1	1	1
336	H7C0X4;C9J7S5;Q92685-2;Q92685	H7C0X4;C9J7S5;Q92685-2;Q92685	Dol-P-Man:Man(5)GlcNAc(2)-PP-Dol alpha-1,3-mannosyltransferase	ALG3	tr|H7C0X4|H7C0X4_HUMAN Dol-P-Man:Man(5)GlcNAc(2)-PP-Dol alpha-1,3-mannosyltransferase (Fragment) OS=Homo sapiens GN=ALG3 PE=1 SV=1;tr|C9J7S5|C9J7S5_HUMAN Dol-P-Man:Man(5)GlcNAc(2)-PP-Dol alpha-1,3-mannosyltransferase OS=Homo sapiens GN=ALG3 PE=4 SV=1;sp|Q9	135470000	47522000	12200000	9031500	3168100	136750000	59255000	2	2	2	6.2	6.2	6.2	36.898	0	21.913	182990000	12	6.2	6.2	6	6	4	2	2	2	2	2	2
337	C9J880;Q68CQ7-2;Q68CQ7;C9JA13;C9JPK4;C9JNB0;C9JY96	C9J880;Q68CQ7-2;Q68CQ7;C9JA13;C9JPK4	Glycosyltransferase 8 domain-containing protein 1	GLT8D1	tr|C9J880|C9J880_HUMAN Glycosyltransferase 8 domain-containing protein 1 (Fragment) OS=Homo sapiens GN=GLT8D1 PE=4 SV=1;sp|Q68CQ7-2|GL8D1_HUMAN Isoform 2 of Glycosyltransferase 8 domain-containing protein 1 OS=Homo sapiens GN=GLT8D1;sp|Q68CQ7|GL8D1_HUMAN G	141110000	154740000	24654000	11759000	12895000	121760000	145890000	4	4	4	36.2	36.2	36.2	19.42	0	24.399	295850000	19	28.2	36.2	10	9	7	3	4	3	4	3	4
338	C9J998;F2Z3N7;C9JZ87;Q9NUM4	C9J998;F2Z3N7;C9JZ87;Q9NUM4	Transmembrane protein 106B	TMEM106B	tr|C9J998|C9J998_HUMAN Transmembrane protein 106B (Fragment) OS=Homo sapiens GN=TMEM106B PE=4 SV=1;tr|F2Z3N7|F2Z3N7_HUMAN Transmembrane protein 106B OS=Homo sapiens GN=TMEM106B PE=1 SV=1;tr|C9JZ87|C9JZ87_HUMAN Transmembrane protein 106B (Fragment) OS=Homo	0	8301900	4150900	0	4150900	0	13342000	1	1	1	44	44	44	2.7029	0	10.812	8301900	2	44	44	1	1	4	1	1	1	1	1	1
339	C9J9K3;P08865;A6NE09;C9JQR9	C9J9K3;P08865;A6NE09	40S ribosomal protein SA	RPSA;RPSAP58	tr|C9J9K3|C9J9K3_HUMAN 40S ribosomal protein SA (Fragment) OS=Homo sapiens GN=RPSA PE=1 SV=3;sp|P08865|RSSA_HUMAN 40S ribosomal protein SA OS=Homo sapiens GN=RPSA PE=1 SV=4;tr|A6NE09|A6NE09_HUMAN 40S ribosomal protein SA OS=Homo sapiens GN=RPSAP58 PE=3 SV=	3683700000	3307000000	466040000	245580000	220470000	3751400000	3301700000	13	13	13	64.4	64.4	64.4	29.505	0	288.87	6990600000	124	64.4	58.7	62	62	4	12	11	12	11	12	11
340	C9J9N5;P43004-3;P43004-2;P43004	C9J9N5;P43004-3;P43004-2;P43004	Amino acid transporter;Excitatory amino acid transporter 2	SLC1A2	tr|C9J9N5|C9J9N5_HUMAN Amino acid transporter (Fragment) OS=Homo sapiens GN=SLC1A2 PE=3 SV=1;sp|P43004-3|EAA2_HUMAN Isoform 3 of Excitatory amino acid transporter 2 OS=Homo sapiens GN=SLC1A2;sp|P43004-2|EAA2_HUMAN Isoform 2 of Excitatory amino acid transpo	13581000	2806300	1638700	1358100	280630	9531600	5082800	2	2	2	18.1	18.1	18.1	21.541	0.00029895	5.2426	16387000	3	18.1	8	2	1	4	2	1	2	1	2	1
341	C9J9V0;Q5THK1-3;Q5THK1-2;Q5THK1-4;Q5THK1	C9J9V0;Q5THK1-3;Q5THK1-2;Q5THK1-4;Q5THK1	Protein PRR14L	PRR14L	tr|C9J9V0|C9J9V0_HUMAN Protein PRR14L (Fragment) OS=Homo sapiens GN=PRR14L PE=1 SV=1;sp|Q5THK1-3|PR14L_HUMAN Isoform 3 of Protein PRR14L OS=Homo sapiens GN=PRR14L;sp|Q5THK1-2|PR14L_HUMAN Isoform 2 of Protein PRR14L OS=Homo sapiens GN=PRR14L;sp|Q5THK1-4|PR1	49432000	57768000	9745500	4493800	5251700	49432000	55420000	1	1	1	9.4	9.4	9.4	19.347	0.0082703	1.9897	107200000	5	9.4	9.4	2	3	5	1	1	1	1	1	1
342	C9JQB1;C9J9V6;O75414;C9J1J2;O75414-2	C9JQB1;C9J9V6;O75414;C9J1J2;O75414-2	Nucleoside diphosphate kinase;Nucleoside diphosphate kinase 6	NME6	tr|C9JQB1|C9JQB1_HUMAN Nucleoside diphosphate kinase OS=Homo sapiens GN=NME6 PE=1 SV=1;tr|C9J9V6|C9J9V6_HUMAN Nucleoside diphosphate kinase (Fragment) OS=Homo sapiens GN=NME6 PE=1 SV=1;sp|O75414|NDK6_HUMAN Nucleoside diphosphate kinase 6 OS=Homo sapiens GN	25352000	24651000	5000300	2535200	2465100	21521000	19454000	2	2	2	14.2	14.2	14.2	16.188	0.00031328	6.2636	50003000	7	14.2	9.2	5	2	5	2	1	2	1	2	1
343	C9J9W2;Q14847;Q14847-2;Q14847-3;J3KSN1	C9J9W2;Q14847;Q14847-2;Q14847-3	LIM and SH3 domain protein 1	LASP1	tr|C9J9W2|C9J9W2_HUMAN LIM and SH3 domain protein 1 (Fragment) OS=Homo sapiens GN=LASP1 PE=1 SV=1;sp|Q14847|LASP1_HUMAN LIM and SH3 domain protein 1 OS=Homo sapiens GN=LASP1 PE=1 SV=2;sp|Q14847-2|LASP1_HUMAN Isoform 2 of LIM and SH3 domain protein 1 OS=Hom	47154000	0	4715400	4715400	0	41848000	0	3	3	3	35.5	35.5	35.5	18.98	0	8.4733	47154000	4	35.5	7.2	3	1	5	3	1	3	1	3	1
344	C9JA07;Q9GZY4;C9J6J1	C9JA07;Q9GZY4;C9J6J1	Cytochrome c oxidase assembly factor 1 homolog	COA1	tr|C9JA07|C9JA07_HUMAN Cytochrome c oxidase assembly factor 1 homolog (Fragment) OS=Homo sapiens GN=COA1 PE=1 SV=1;sp|Q9GZY4|COA1_HUMAN Cytochrome c oxidase assembly factor 1 homolog OS=Homo sapiens GN=COA1 PE=1 SV=1;tr|C9J6J1|C9J6J1_HUMAN Cytochrome c oxi	258460000	285950000	90734000	43076000	47658000	331970000	315760000	2	2	2	32.7	32.7	32.7	12.828	0	13.296	544410000	7	23	32.7	4	3	3	1	2	1	2	1	2
345	C9JA28;Q9UNL2;Q9UNL2-2	C9JA28;Q9UNL2;Q9UNL2-2	Translocon-associated protein subunit gamma	SSR3	tr|C9JA28|C9JA28_HUMAN Translocon-associated protein subunit gamma OS=Homo sapiens GN=SSR3 PE=1 SV=1;sp|Q9UNL2|SSRG_HUMAN Translocon-associated protein subunit gamma OS=Homo sapiens GN=SSR3 PE=1 SV=1;sp|Q9UNL2-2|SSRG_HUMAN Isoform 2 of Translocon-associate	521580000	615600000	189530000	86931000	102600000	405110000	458410000	1	1	1	8	8	8	20.161	0	99.155	1137200000	27	8	8	14	13	3	1	1	1	1	1	1
346	C9JAB2;Q16629-3;Q16629-2;Q16629-4;Q16629;F8WEA1	C9JAB2;Q16629-3;Q16629-2;Q16629-4;Q16629	Serine/arginine-rich splicing factor 7	SRSF7	tr|C9JAB2|C9JAB2_HUMAN Serine/arginine-rich-splicing factor 7 OS=Homo sapiens GN=SRSF7 PE=1 SV=1;sp|Q16629-3|SRSF7_HUMAN Isoform 3 of Serine/arginine-rich splicing factor 7 OS=Homo sapiens GN=SRSF7;sp|Q16629-2|SRSF7_HUMAN Isoform 2 of Serine/arginine-rich	2287800000	2068400000	335090000	175980000	159100000	2045400000	2369700000	10	10	9	36.2	36.2	36.2	26.928	0	185.43	4356100000	95	33.6	28.9	42	53	6	9	8	9	8	8	7
347	C9JAW5;C9JNU6;Q9Y241;A8MV81;Q9Y241-2	C9JAW5;C9JNU6;Q9Y241;A8MV81;Q9Y241-2	HIG1 domain family member 1A, mitochondrial;HIG1 domain family member 1C	HIGD1A;HIGD1C	tr|C9JAW5|C9JAW5_HUMAN HIG1 domain family member 1A, mitochondrial OS=Homo sapiens GN=HIGD1A PE=1 SV=1;tr|C9JNU6|C9JNU6_HUMAN HIG1 domain family member 1A, mitochondrial OS=Homo sapiens GN=HIGD1A PE=1 SV=1;sp|Q9Y241|HIG1A_HUMAN HIG1 domain family member 1A	146910000	92771000	59920000	36727000	23193000	127270000	92753000	2	2	2	32.5	32.5	32.5	8.8131	0	48.759	239680000	13	32.5	32.5	8	5	5	2	2	2	2	2	2
348	C9JAX1;Q16595;H7C585;Q16595-2;Q16595-3	C9JAX1;Q16595;H7C585	Frataxin, mitochondrial;Frataxin intermediate form;Frataxin(56-210);Frataxin(78-210);Frataxin mature form	FXN	tr|C9JAX1|C9JAX1_HUMAN Frataxin, mitochondrial OS=Homo sapiens GN=FXN PE=1 SV=1;sp|Q16595|FRDA_HUMAN Frataxin, mitochondrial OS=Homo sapiens GN=FXN PE=1 SV=2;tr|H7C585|H7C585_HUMAN Frataxin, mitochondrial (Fragment) OS=Homo sapiens GN=FXN PE=1 SV=1	126190000	437540000	70467000	15774000	54693000	304540000	350550000	6	6	6	55.6	55.6	55.6	14.91	0	21.746	563740000	16	18.5	55.6	7	9	5	3	6	3	6	3	6
349	E9PMC3;F5H8L4;C9JBG5;Q8NBJ9;Q8NBJ9-2	E9PMC3;F5H8L4;C9JBG5;Q8NBJ9;Q8NBJ9-2	SID1 transmembrane family member 2	SIDT2	tr|E9PMC3|E9PMC3_HUMAN SID1 transmembrane family member 2 (Fragment) OS=Homo sapiens GN=SIDT2 PE=4 SV=1;tr|F5H8L4|F5H8L4_HUMAN SID1 transmembrane family member 2 OS=Homo sapiens GN=SIDT2 PE=1 SV=1;tr|C9JBG5|C9JBG5_HUMAN SID1 transmembrane family member 2 O	4796200	13962000	3126400	799370	2327100	8520300	10819000	2	2	2	20	20	20	12.51	0.0012525	2.7066	18759000	4	8.2	20	2	2	5	1	2	1	2	1	2
350	C9JBI3;P78330	C9JBI3;P78330	Phosphoserine phosphatase	PSPH	tr|C9JBI3|C9JBI3_HUMAN Phosphoserine phosphatase (Fragment) OS=Homo sapiens GN=PSPH PE=1 SV=1;sp|P78330|SERB_HUMAN Phosphoserine phosphatase OS=Homo sapiens GN=PSPH PE=1 SV=2	52018000	124860000	13606000	4001400	9604900	121990000	95982000	4	4	4	25.1	25.1	25.1	20.745	0	16.443	176880000	6	18.7	18.2	3	3	2	3	3	3	3	3	3
351	C9JEU5;C9JC84;P02679-2;P02679;C9JPQ9;C9JU00	C9JEU5;C9JC84;P02679-2;P02679	Fibrinogen gamma chain	FGG	tr|C9JEU5|C9JEU5_HUMAN Fibrinogen gamma chain OS=Homo sapiens GN=FGG PE=1 SV=1;tr|C9JC84|C9JC84_HUMAN Fibrinogen gamma chain OS=Homo sapiens GN=FGG PE=1 SV=1;sp|P02679-2|FIBG_HUMAN Isoform Gamma-A of Fibrinogen gamma chain OS=Homo sapiens GN=FGG;sp|P02679|	526710000	270520000	27491000	18162000	9328400	418690000	304090000	8	8	8	32.1	32.1	32.1	50.322	0	42.807	797230000	30	29.4	28.8	18	12	6	7	7	7	7	7	7
352	E9PNC7;E9PQX9;C9JCC6;Q14919;Q14919-2	E9PNC7;E9PQX9;C9JCC6;Q14919;Q14919-2	Dr1-associated corepressor	DRAP1	tr|E9PNC7|E9PNC7_HUMAN Dr1-associated corepressor (Fragment) OS=Homo sapiens GN=DRAP1 PE=1 SV=3;tr|E9PQX9|E9PQX9_HUMAN Dr1-associated corepressor OS=Homo sapiens GN=DRAP1 PE=1 SV=1;tr|C9JCC6|C9JCC6_HUMAN Dr1-associated corepressor OS=Homo sapiens GN=DRAP1	25800000	39165000	10827000	4299900	6527500	34871000	19935000	2	2	2	14.1	14.1	14.1	16.658	0.00057356	4.3763	64965000	8	7.1	14.1	3	5	5	1	2	1	2	1	2
353	C9JEJ2;P49585;C9J050;H7C1T3;C9J2E1;Q9Y5K3-2;Q9Y5K3-4;Q9Y5K3-3;Q9Y5K3;C9JVS0;C9JPY0;F8WAZ5;H7BZN1;F2Z2B1	C9JEJ2;P49585;C9J050;H7C1T3;C9J2E1;Q9Y5K3-2;Q9Y5K3-4;Q9Y5K3-3;Q9Y5K3	Choline-phosphate cytidylyltransferase A;Choline-phosphate cytidylyltransferase B	PCYT1A;PCYT1B	tr|C9JEJ2|C9JEJ2_HUMAN Choline-phosphate cytidylyltransferase A OS=Homo sapiens GN=PCYT1A PE=1 SV=1;sp|P49585|PCY1A_HUMAN Choline-phosphate cytidylyltransferase A OS=Homo sapiens GN=PCYT1A PE=1 SV=2;tr|C9J050|C9J050_HUMAN Choline-phosphate cytidylyltransfe	77047000	65042000	4899600	2656800	2242800	78899000	72018000	4	4	4	15.3	15.3	15.3	43.263	0	12.831	142090000	14	10.8	12.6	6	8	14	3	3	3	3	3	3
354	C9JES7;H7C3D8;Q7Z7K0	C9JES7;H7C3D8;Q7Z7K0	COX assembly mitochondrial protein homolog	CMC1	tr|C9JES7|C9JES7_HUMAN COX assembly mitochondrial protein homolog OS=Homo sapiens GN=CMC1 PE=1 SV=1;tr|H7C3D8|H7C3D8_HUMAN COX assembly mitochondrial protein homolog (Fragment) OS=Homo sapiens GN=CMC1 PE=1 SV=1;sp|Q7Z7K0|COXM1_HUMAN COX assembly mitochondr	25213000	28602000	10763000	5042500	5720400	25726000	19302000	2	2	2	34.2	34.2	34.2	8.8633	0	10.976	53814000	5	34.2	34.2	3	2	3	2	2	2	2	2	2
355	C9JFR7;P99999;CON__P62894	C9JFR7;P99999	Cytochrome c	CYCS	tr|C9JFR7|C9JFR7_HUMAN Cytochrome c (Fragment) OS=Homo sapiens GN=CYCS PE=1 SV=1;sp|P99999|CYC_HUMAN Cytochrome c OS=Homo sapiens GN=CYCS PE=1 SV=2	2569900000	2435200000	625640000	321230000	304400000	2176700000	2025300000	8	8	8	64.4	64.4	64.4	11.333	0	190.84	5005100000	139	64.4	64.4	64	75	3	8	8	8	8	8	8
356	C9JFW8;C9JX16;Q9UQQ1-8;Q9UQQ1-2;Q9UQQ1-3;Q9UQQ1;Q9UQQ1-4;Q9UQQ1-5;Q9UQQ1-6;Q9UQQ1-7;H0YEI8;E9PRC7	C9JFW8;C9JX16;Q9UQQ1-8;Q9UQQ1-2;Q9UQQ1-3;Q9UQQ1;Q9UQQ1-4;Q9UQQ1-5;Q9UQQ1-6;Q9UQQ1-7	N-acetylated-alpha-linked acidic dipeptidase-like protein	NAALADL1	tr|C9JFW8|C9JFW8_HUMAN N-acetylated-alpha-linked acidic dipeptidase-like protein OS=Homo sapiens GN=NAALADL1 PE=4 SV=1;tr|C9JX16|C9JX16_HUMAN N-acetylated-alpha-linked acidic dipeptidase-like protein OS=Homo sapiens GN=NAALADL1 PE=4 SV=2;sp|Q9UQQ1-8|NALDL_	20087000	9991200	812940	542900	270030	13977000	16400000	4	4	4	8.4	8.4	8.4	76.902	0	9.0063	30079000	8	8.4	1.4	8	0	12	4	1	4	1	4	1
357	C9JG41;Q9NQX7-2;Q9NQX7;Q9NQX7-3;F5H4I5;E7EUS6;B8ZZM6	C9JG41;Q9NQX7-2;Q9NQX7;Q9NQX7-3;F5H4I5;E7EUS6;B8ZZM6	Integral membrane protein 2C;CT-BRI3	ITM2C	tr|C9JG41|C9JG41_HUMAN Integral membrane protein 2C (Fragment) OS=Homo sapiens GN=ITM2C PE=1 SV=1;sp|Q9NQX7-2|ITM2C_HUMAN Isoform 2 of Integral membrane protein 2C OS=Homo sapiens GN=ITM2C;sp|Q9NQX7|ITM2C_HUMAN Integral membrane protein 2C OS=Homo sapiens	49078000	90508000	12690000	4461600	8228000	85532000	82179000	4	4	4	36.1	36.1	36.1	20.056	0	22.07	139590000	9	17.8	29.4	3	6	7	2	3	2	3	2	3
358	H7C2J3;C9JGB2;Q96LZ7-3;Q96LZ7-4;Q96LZ7;Q96LZ7-2	H7C2J3;C9JGB2;Q96LZ7-3;Q96LZ7-4;Q96LZ7;Q96LZ7-2	Regulator of microtubule dynamics protein 2	RMDN2	tr|H7C2J3|H7C2J3_HUMAN Regulator of microtubule dynamics protein 2 (Fragment) OS=Homo sapiens GN=RMDN2 PE=4 SV=1;tr|C9JGB2|C9JGB2_HUMAN Regulator of microtubule dynamics protein 2 (Fragment) OS=Homo sapiens GN=RMDN2 PE=4 SV=1;sp|Q96LZ7-3|RMD2_HUMAN Isoform	15144000	0	1376800	1376800	0	14620000	0	2	2	2	18	18	18	17.3	0.00078044	3.0766	15144000	2	18	0	2	0	6	2	0	2	0	2	0
359	C9JGT8	C9JGT8		AP2M1	tr|C9JGT8|C9JGT8_HUMAN AP-2 complex subunit mu (Fragment) OS=Homo sapiens GN=AP2M1 PE=1 SV=1	0	31590000	2256400	0	2256400	0	36356000	7	1	1	39	8.7	8.7	22.224	1	-2	31590000	1	26.2	39	0	1	1	5	7	0	1	0	1
360	C9JXG8;C9JJ34;C9JGV6;F6WQW2;P43487-2;P43487;C9JIC6;C9JDM3	C9JXG8;C9JJ34;C9JGV6;F6WQW2;P43487-2;P43487;C9JIC6;C9JDM3	Ran-specific GTPase-activating protein	RANBP1	tr|C9JXG8|C9JXG8_HUMAN Ran-specific GTPase-activating protein (Fragment) OS=Homo sapiens GN=RANBP1 PE=1 SV=2;tr|C9JJ34|C9JJ34_HUMAN Ran-specific GTPase-activating protein (Fragment) OS=Homo sapiens GN=RANBP1 PE=1 SV=1;tr|C9JGV6|C9JGV6_HUMAN Ran-specific GT	129290000	94781000	24897000	14366000	10531000	130190000	124390000	2	2	2	23.4	23.4	23.4	16.9	0	20.105	224070000	12	23.4	15.9	7	5	8	2	1	2	1	2	1
361	C9JHK9;C9JZV3;Q9UG63;Q9UG63-2	C9JHK9;C9JZV3;Q9UG63;Q9UG63-2	ATP-binding cassette sub-family F member 2	ABCF2	tr|C9JHK9|C9JHK9_HUMAN ATP-binding cassette sub-family F member 2 (Fragment) OS=Homo sapiens GN=ABCF2 PE=1 SV=1;tr|C9JZV3|C9JZV3_HUMAN ATP-binding cassette sub-family F member 2 (Fragment) OS=Homo sapiens GN=ABCF2 PE=1 SV=3;sp|Q9UG63|ABCF2_HUMAN ATP-bindin	42797000	17955000	3797100	2674800	1122200	16919000	26678000	1	1	1	6.2	6.2	6.2	26.93	0.00054765	3.6979	60753000	3	6.2	6.2	2	1	4	1	1	1	1	1	1
362	C9JPA8;C9JHN8;Q7L5D6-2;Q7L5D6	C9JPA8;C9JHN8;Q7L5D6-2;Q7L5D6	Golgi to ER traffic protein 4 homolog	GET4	tr|C9JPA8|C9JPA8_HUMAN Golgi to ER traffic protein 4 homolog (Fragment) OS=Homo sapiens GN=GET4 PE=1 SV=2;tr|C9JHN8|C9JHN8_HUMAN Golgi to ER traffic protein 4 homolog (Fragment) OS=Homo sapiens GN=GET4 PE=1 SV=1;sp|Q7L5D6-2|GET4_HUMAN Isoform 2 of Golgi to	8192900	7563400	1969500	1024100	945430	0	7256000	1	1	1	10.1	10.1	10.1	16.543	0.0093963	1.9508	15756000	0	10.1	10.1	0	0	4	1	1	1	1	1	1
363	C9JIF9;P13798;H7C393;H7C1U0;C9JLK2;F8WEH5	C9JIF9;P13798;H7C393;H7C1U0	Acylamino-acid-releasing enzyme	APEH	tr|C9JIF9|C9JIF9_HUMAN Acylamino-acid-releasing enzyme OS=Homo sapiens GN=APEH PE=1 SV=1;sp|P13798|ACPH_HUMAN Acylamino-acid-releasing enzyme OS=Homo sapiens GN=APEH PE=1 SV=4;tr|H7C393|H7C393_HUMAN Acylamino-acid-releasing enzyme (Fragment) OS=Homo sapien	114180000	114670000	6538600	3262400	3276200	135170000	120520000	6	6	6	11.9	11.9	11.9	81.673	0	14.54	228850000	8	8.8	6.2	5	3	6	5	3	5	3	5	3
364	C9JIG9;O95747	C9JIG9;O95747	Serine/threonine-protein kinase OSR1	OXSR1	tr|C9JIG9|C9JIG9_HUMAN Serine/threonine-protein kinase OSR1 OS=Homo sapiens GN=OXSR1 PE=1 SV=1;sp|O95747|OXSR1_HUMAN Serine/threonine-protein kinase OSR1 OS=Homo sapiens GN=OXSR1 PE=1 SV=1	14748000	0	614480	614480	0	9363200	0	1	1	1	4.7	4.7	4.7	51.856	0.0005454	3.6489	14748000	1	4.7	0	1	0	2	1	0	1	0	1	0
365	C9JIZ1;C9J5E5;C9JHS7;C9JHZ8;C9JES8;C9JZI8;C9JT62;C9JK79;C9JBS3;C9JEJ8;A0A088AWM1;C9JHN6	C9JIZ1;C9J5E5;C9JHS7;C9JHZ8;C9JES8;C9JZI8;C9JT62;C9JK79		HDLBP	tr|C9JIZ1|C9JIZ1_HUMAN Vigilin (Fragment) OS=Homo sapiens GN=HDLBP PE=1 SV=2;tr|C9J5E5|C9J5E5_HUMAN Vigilin (Fragment) OS=Homo sapiens GN=HDLBP PE=1 SV=2;tr|C9JHS7|C9JHS7_HUMAN Vigilin (Fragment) OS=Homo sapiens GN=HDLBP PE=1 SV=2;tr|C9JHZ8|C9JHZ8_HUMAN Vi	0	16252000	1083500	0	1083500	0	15592000	7	1	1	42	7.6	7.6	24.708	0.0012569	2.7227	16252000	2	31.2	31.7	1	1	12	5	5	1	1	1	1
366	C9JJ19;P82930;A0A087WUZ8	C9JJ19;P82930;A0A087WUZ8	28S ribosomal protein S34, mitochondrial	MRPS34	tr|C9JJ19|C9JJ19_HUMAN 28S ribosomal protein S34, mitochondrial OS=Homo sapiens GN=MRPS34 PE=1 SV=2;sp|P82930|RT34_HUMAN 28S ribosomal protein S34, mitochondrial OS=Homo sapiens GN=MRPS34 PE=1 SV=2;tr|A0A087WUZ8|A0A087WUZ8_HUMAN 28S ribosomal protein S34,	1005100000	912220000	127820000	67009000	60814000	846740000	747280000	8	8	8	40	40	40	26.332	0	68.925	1917300000	76	40	36.4	34	42	3	8	6	8	6	8	6
367	C9JUE0;C9JJP5;Q05BK6;K0J6K2;Q92734-2;Q92734;C9JTY3	C9JUE0;C9JJP5;Q05BK6;K0J6K2;Q92734-2;Q92734;C9JTY3	Protein TFG	TFG	tr|C9JUE0|C9JUE0_HUMAN Protein TFG (Fragment) OS=Homo sapiens GN=TFG PE=1 SV=1;tr|C9JJP5|C9JJP5_HUMAN Protein TFG (Fragment) OS=Homo sapiens GN=TFG PE=1 SV=1;tr|Q05BK6|Q05BK6_HUMAN Protein TFG OS=Homo sapiens GN=TFG PE=1 SV=1;tr|K0J6K2|K0J6K2_HUMAN Protein	13912000	13381000	2729300	1391200	1338100	0	18147000	2	2	2	30.6	30.6	30.6	17.731	0.0039264	2.4275	27293000	1	18.5	12.1	1	0	7	1	1	1	1	1	1
368	C9JJX6;E9PDC3;O00192-2;O00192	C9JJX6;E9PDC3;O00192-2;O00192	Armadillo repeat protein deleted in velo-cardio-facial syndrome	ARVCF	tr|C9JJX6|C9JJX6_HUMAN Armadillo repeat protein deleted in velo-cardio-facial syndrome OS=Homo sapiens GN=ARVCF PE=1 SV=1;tr|E9PDC3|E9PDC3_HUMAN Armadillo repeat protein deleted in velo-cardio-facial syndrome OS=Homo sapiens GN=ARVCF PE=1 SV=1;sp|O00192-2|	85905000	19603000	1953800	1590800	363010	56603000	50116000	3	3	3	4	4	4	96.827	0.00032584	7.4157	105510000	6	4	3.2	4	2	4	3	2	3	2	3	2
369	C9JLU1;P52434-2;P52434;P52434-4	C9JLU1;P52434-2;P52434;P52434-4	DNA-directed RNA polymerases I, II, and III subunit RPABC3	POLR2H	tr|C9JLU1|C9JLU1_HUMAN DNA-directed RNA polymerases I, II, and III subunit RPABC3 (Fragment) OS=Homo sapiens GN=POLR2H PE=1 SV=3;sp|P52434-2|RPAB3_HUMAN Isoform 2 of DNA-directed RNA polymerases I, II, and III subunit RPABC3 OS=Homo sapiens GN=POLR2H;sp|P5	39063000	0	3906300	3906300	0	32489000	0	1	1	1	8.1	8.1	8.1	16.996	0.0041403	2.3384	39063000	1	8.1	0	1	0	4	1	0	1	0	1	0
370	C9JME2;Q9Y4F1;Q9Y4F1-2;M0QYB0;M0QXT1;M0R262;H0Y783;Q9Y4F1-3	C9JME2;Q9Y4F1;Q9Y4F1-2	FERM, RhoGEF and pleckstrin domain-containing protein 1	FARP1	tr|C9JME2|C9JME2_HUMAN FERM, RhoGEF and pleckstrin domain-containing protein 1 OS=Homo sapiens GN=FARP1 PE=1 SV=2;sp|Q9Y4F1|FARP1_HUMAN FERM, RhoGEF and pleckstrin domain-containing protein 1 OS=Homo sapiens GN=FARP1 PE=1 SV=1;sp|Q9Y4F1-2|FARP1_HUMAN Isofo	1817300000	1498100000	49484000	27123000	22360000	1448100000	1490200000	28	28	28	36.2	36.2	36.2	122.09	0	226.51	3315400000	148	30.9	29.6	71	77	8	22	24	22	24	22	24
371	C9JN15;Q13427-2;Q13427;E9PG73;C9JM79;C9JT64;C9J679	C9JN15;Q13427-2;Q13427;E9PG73;C9JM79	Peptidyl-prolyl cis-trans isomerase;Peptidyl-prolyl cis-trans isomerase G	PPIG	tr|C9JN15|C9JN15_HUMAN Peptidyl-prolyl cis-trans isomerase (Fragment) OS=Homo sapiens GN=PPIG PE=3 SV=1;sp|Q13427-2|PPIG_HUMAN Isoform 2 of Peptidyl-prolyl cis-trans isomerase G OS=Homo sapiens GN=PPIG;sp|Q13427|PPIG_HUMAN Peptidyl-prolyl cis-trans isomera	281770000	276720000	39892000	20127000	19766000	357130000	281180000	7	7	7	31.7	31.7	31.7	27.409	0	42.186	558490000	33	28	20.3	22	11	7	6	5	6	5	6	5
372	F2Z2Y6;C9JNV3;O95777;C9JIZ0	F2Z2Y6;C9JNV3;O95777;C9JIZ0	U6 snRNA-associated Sm-like protein LSm8	LSM8	tr|F2Z2Y6|F2Z2Y6_HUMAN U6 snRNA-associated Sm-like protein LSm8 OS=Homo sapiens GN=LSM8 PE=1 SV=1;tr|C9JNV3|C9JNV3_HUMAN U6 snRNA-associated Sm-like protein LSm8 (Fragment) OS=Homo sapiens GN=LSM8 PE=1 SV=3;sp|O95777|LSM8_HUMAN U6 snRNA-associated Sm-like	105920000	85688000	38321000	21183000	17138000	72776000	66301000	2	2	2	38.8	38.8	38.8	7.3713	0	14.772	191600000	12	38.8	23.9	8	4	4	2	1	2	1	2	1
373	C9JXB8;C9JNW5;P83731	C9JXB8;C9JNW5;P83731	60S ribosomal protein L24	RPL24	tr|C9JXB8|C9JXB8_HUMAN 60S ribosomal protein L24 OS=Homo sapiens GN=RPL24 PE=1 SV=1;tr|C9JNW5|C9JNW5_HUMAN 60S ribosomal protein L24 OS=Homo sapiens GN=RPL24 PE=1 SV=1;sp|P83731|RL24_HUMAN 60S ribosomal protein L24 OS=Homo sapiens GN=RPL24 PE=1 SV=1	2458500000	1887700000	620900000	351220000	269680000	1695400000	2030200000	6	6	6	41.3	41.3	41.3	14.369	0	42.17	4346300000	60	41.3	39.7	33	27	3	6	5	6	5	6	5
374	C9JRY4;C9JNZ0;Q96IW7;C9JDJ8;F8WAU7;C9JR77;C9J463;C9JZ27	C9JRY4;C9JNZ0;Q96IW7;C9JDJ8	Vesicle-trafficking protein SEC22a	SEC22A	tr|C9JRY4|C9JRY4_HUMAN Vesicle-trafficking protein SEC22a (Fragment) OS=Homo sapiens GN=SEC22A PE=1 SV=1;tr|C9JNZ0|C9JNZ0_HUMAN Vesicle-trafficking protein SEC22a (Fragment) OS=Homo sapiens GN=SEC22A PE=1 SV=4;sp|Q96IW7|SC22A_HUMAN Vesicle-trafficking prot	64413000	28919000	8484800	5855700	2629000	40071000	40687000	3	3	3	18.3	18.3	18.3	24.506	0.0003124	6.1925	93332000	5	18.3	13.3	3	2	8	3	2	3	2	3	2
375	H7C053;C9JQA1;O60828-7;O60828-6;O60828-4;O60828-3;O60828-2;O60828	H7C053;C9JQA1;O60828-7;O60828-6;O60828-4;O60828-3;O60828-2;O60828	Polyglutamine-binding protein 1	PQBP1	tr|H7C053|H7C053_HUMAN Polyglutamine-binding protein 1 (Fragment) OS=Homo sapiens GN=PQBP1 PE=1 SV=1;tr|C9JQA1|C9JQA1_HUMAN Polyglutamine-binding protein 1 (Fragment) OS=Homo sapiens GN=PQBP1 PE=1 SV=1;sp|O60828-7|PQBP1_HUMAN Isoform 7 of Polyglutamine-bin	11807000	6820700	3104500	1967800	1136800	11807000	6543500	1	1	1	22	22	22	16.455	0.00029789	5.1872	18627000	4	22	22	3	1	8	1	1	1	1	1	1
376	H0YEL5;C9JQD4;O43447-2;O43447	H0YEL5;C9JQD4;O43447-2;O43447	Peptidyl-prolyl cis-trans isomerase;Peptidyl-prolyl cis-trans isomerase H	PPIH	tr|H0YEL5|H0YEL5_HUMAN Peptidyl-prolyl cis-trans isomerase H (Fragment) OS=Homo sapiens GN=PPIH PE=1 SV=1;tr|C9JQD4|C9JQD4_HUMAN Peptidyl-prolyl cis-trans isomerase (Fragment) OS=Homo sapiens GN=PPIH PE=1 SV=1;sp|O43447-2|PPIH_HUMAN Isoform 2 of Peptidyl-p	45771000	38646000	10552000	5721400	4830800	0	47291000	2	2	2	24	24	24	10.281	0.00030451	5.6146	84417000	4	24	14.6	3	1	4	2	1	2	1	2	1
377	C9JQV0;Q9BRJ6;H7C0T1;H7C2R9	C9JQV0;Q9BRJ6	Uncharacterized protein C7orf50	C7orf50	tr|C9JQV0|C9JQV0_HUMAN Uncharacterized protein C7orf50 (Fragment) OS=Homo sapiens GN=C7orf50 PE=1 SV=1;sp|Q9BRJ6|CG050_HUMAN Uncharacterized protein C7orf50 OS=Homo sapiens GN=C7orf50 PE=1 SV=1	55100000	44703000	9073100	5009100	4063900	51956000	51383000	3	3	3	28.6	28.6	28.6	21.883	0	13.77	99804000	7	28.6	17.7	4	3	4	3	2	3	2	3	2
378	C9JQV3;Q8N1F8-2;Q8N1F8	C9JQV3;Q8N1F8-2;Q8N1F8	Serine/threonine-protein kinase 11-interacting protein	STK11IP	tr|C9JQV3|C9JQV3_HUMAN Serine/threonine-protein kinase 11-interacting protein OS=Homo sapiens GN=STK11IP PE=1 SV=1;sp|Q8N1F8-2|S11IP_HUMAN Isoform 2 of Serine/threonine-protein kinase 11-interacting protein OS=Homo sapiens GN=STK11IP;sp|Q8N1F8|S11IP_HUMAN	17694000	4730300	400430	315960	84470	22733000	0	2	2	2	2.4	2.4	2.4	120.26	0.00055218	3.8094	22424000	2	1.3	1.1	1	1	3	1	1	1	1	1	1
379	C9JRP1;E9PFN4;Q9Y6M7-11;Q9Y6M7-14;Q9Y6M7-10;Q9Y6M7-4;Q9Y6M7-3;Q9Y6M7-2;Q9Y6M7-9;Q9Y6M7-6;Q9Y6M7-13;Q9Y6M7-12;Q9Y6M7;Q9Y6M7-8;Q9Y6M7-7;H7C3C4;Q9Y6M7-5	C9JRP1;E9PFN4;Q9Y6M7-11;Q9Y6M7-14;Q9Y6M7-10;Q9Y6M7-4;Q9Y6M7-3;Q9Y6M7-2;Q9Y6M7-9;Q9Y6M7-6;Q9Y6M7-13;Q9Y6M7-12;Q9Y6M7;Q9Y6M7-8;Q9Y6M7-7	Anion exchange protein;Sodium bicarbonate cotransporter 3	SLC4A7	tr|C9JRP1|C9JRP1_HUMAN Sodium bicarbonate cotransporter 3 (Fragment) OS=Homo sapiens GN=SLC4A7 PE=1 SV=1;tr|E9PFN4|E9PFN4_HUMAN Sodium bicarbonate cotransporter 3 OS=Homo sapiens GN=SLC4A7 PE=1 SV=1;sp|Q9Y6M7-11|S4A7_HUMAN Isoform 11 of Sodium bicarbonate	129670000	41008000	3282300	2493700	788620	107440000	20722000	5	5	5	7.1	7.1	7.1	118.46	0	15.314	170680000	11	6	4.5	9	2	17	4	3	4	3	4	3
380	C9JRZ6;Q9NX63;F8WAR4;F8WD73	C9JRZ6;Q9NX63;F8WAR4	MICOS complex subunit MIC19	CHCHD3	tr|C9JRZ6|C9JRZ6_HUMAN MICOS complex subunit MIC19 OS=Homo sapiens GN=CHCHD3 PE=1 SV=1;sp|Q9NX63|MIC19_HUMAN MICOS complex subunit MIC19 OS=Homo sapiens GN=CHCHD3 PE=1 SV=1;tr|F8WAR4|F8WAR4_HUMAN MICOS complex subunit MIC19 OS=Homo sapiens GN=CHCHD3 PE=1 S	1167400000	980420000	113040000	61443000	51601000	1099700000	1144100000	8	8	8	30.6	30.6	30.6	26.694	0	154.67	2147800000	47	30.6	27.2	24	23	4	8	7	8	7	8	7
381	C9JTN7;F8W8I6;P31483-2;P31483;Q96B58;E5RGV5;H7BY49;E5RG67;F8WE16	C9JTN7;F8W8I6;P31483-2;P31483;Q96B58;E5RGV5;H7BY49;E5RG67	Nucleolysin TIA-1 isoform p40	TIA1	tr|C9JTN7|C9JTN7_HUMAN Nucleolysin TIA-1 isoform p40 OS=Homo sapiens GN=TIA1 PE=1 SV=1;tr|F8W8I6|F8W8I6_HUMAN Nucleolysin TIA-1 isoform p40 OS=Homo sapiens GN=TIA1 PE=1 SV=1;sp|P31483-2|TIA1_HUMAN Isoform Short of Nucleolysin TIA-1 isoform p40 OS=Homo sapi	66487000	35317000	6362800	4155400	2207300	67083000	48667000	8	4	4	33.3	19.6	19.6	31.624	0	65.405	101800000	7	33.3	14.4	5	2	9	8	4	4	1	4	1
382	C9JUJ0;Q9UFW8	C9JUJ0;Q9UFW8	CGG triplet repeat-binding protein 1	CGGBP1	tr|C9JUJ0|C9JUJ0_HUMAN CGG triplet repeat-binding protein 1 (Fragment) OS=Homo sapiens GN=CGGBP1 PE=1 SV=1;sp|Q9UFW8|CGBP1_HUMAN CGG triplet repeat-binding protein 1 OS=Homo sapiens GN=CGGBP1 PE=1 SV=2	18609000	0	2326200	2326200	0	13747000	0	1	1	1	13.2	13.2	13.2	11.939	0.0053269	2.2676	18609000	1	13.2	0	1	0	2	1	0	1	0	1	0
383	C9JVN9;Q9H9P8-2;Q9H9P8;G3V5S1;G3V272	C9JVN9;Q9H9P8-2;Q9H9P8	L-2-hydroxyglutarate dehydrogenase, mitochondrial	L2HGDH	tr|C9JVN9|C9JVN9_HUMAN L-2-hydroxyglutarate dehydrogenase, mitochondrial OS=Homo sapiens GN=L2HGDH PE=1 SV=1;sp|Q9H9P8-2|L2HDH_HUMAN Isoform 2 of L-2-hydroxyglutarate dehydrogenase, mitochondrial OS=Homo sapiens GN=L2HGDH;sp|Q9H9P8|L2HDH_HUMAN L-2-hydroxyg	13773000	41797000	1916200	474920	1441300	21372000	40058000	3	3	3	7.9	7.9	7.9	48.475	0.00032744	7.5365	55570000	2	2.7	7.9	0	2	5	1	3	1	3	1	3
384	C9JWM9;C9JVQ5;O94887-3;O94887-2;O94887	C9JWM9;C9JVQ5;O94887-3;O94887-2;O94887	FERM, RhoGEF and pleckstrin domain-containing protein 2	FARP2	tr|C9JWM9|C9JWM9_HUMAN FERM, RhoGEF and pleckstrin domain-containing protein 2 (Fragment) OS=Homo sapiens GN=FARP2 PE=4 SV=1;tr|C9JVQ5|C9JVQ5_HUMAN FERM, RhoGEF and pleckstrin domain-containing protein 2 (Fragment) OS=Homo sapiens GN=FARP2 PE=4 SV=1;sp|O94	18302000	0	3050300	3050300	0	26522000	0	1	1	1	22.6	22.6	22.6	10.65	0.00077922	3.0448	18302000	2	22.6	0	2	0	5	1	0	1	0	1	0
385	C9JVY5;Q9Y2D5;Q9Y2D5-5;Q9Y2D5-7;Q9Y2D5-6;Q9Y2D5-4	C9JVY5;Q9Y2D5;Q9Y2D5-5;Q9Y2D5-7;Q9Y2D5-6;Q9Y2D5-4	A-kinase anchor protein 2	AKAP2	tr|C9JVY5|C9JVY5_HUMAN A-kinase anchor protein 2 (Fragment) OS=Homo sapiens GN=AKAP2 PE=1 SV=1;sp|Q9Y2D5|AKAP2_HUMAN A-kinase anchor protein 2 OS=Homo sapiens GN=AKAP2 PE=1 SV=3;sp|Q9Y2D5-5|AKAP2_HUMAN Isoform 3 of A-kinase anchor protein 2 OS=Homo sapiens	17765000	9430100	697320	455520	241800	15872000	10246000	2	2	2	6.7	6.7	6.7	85.282	0.00031908	6.8095	27195000	4	6.7	3	3	1	6	2	1	2	1	2	1
386	C9JW63;Q9Y2D2-3;Q9Y2D2;Q9Y2D2-2	C9JW63;Q9Y2D2-3;Q9Y2D2;Q9Y2D2-2	UDP-N-acetylglucosamine transporter	SLC35A3	tr|C9JW63|C9JW63_HUMAN UDP-N-acetylglucosamine transporter (Fragment) OS=Homo sapiens GN=SLC35A3 PE=4 SV=1;sp|Q9Y2D2-3|S35A3_HUMAN Isoform 3 of UDP-N-acetylglucosamine transporter OS=Homo sapiens GN=SLC35A3;sp|Q9Y2D2|S35A3_HUMAN UDP-N-acetylglucosamine tra	40133000	15203000	5030600	3648500	1382100	33379000	16519000	1	1	1	6.7	6.7	6.7	24.961	0.0003012	5.4158	55336000	4	6.7	6.7	2	2	4	1	1	1	1	1	1
387	C9JW74;Q5EB52-2;Q5EB52;C9JRA9;C9JCM6;R4GN52;C9JWU9;C9JSW2;Q5EB52-3	C9JW74;Q5EB52-2;Q5EB52;C9JRA9;C9JCM6;R4GN52;C9JWU9;C9JSW2;Q5EB52-3	Mesoderm-specific transcript homolog protein	MEST	tr|C9JW74|C9JW74_HUMAN Mesoderm-specific transcript homolog protein OS=Homo sapiens GN=MEST PE=4 SV=1;sp|Q5EB52-2|MEST_HUMAN Isoform 2 of Mesoderm-specific transcript homolog protein OS=Homo sapiens GN=MEST;sp|Q5EB52|MEST_HUMAN Mesoderm-specific transcript	0	25538000	1824200	0	1824200	0	38204000	2	2	2	12.5	12.5	12.5	34.348	0.00057837	4.5438	25538000	4	6.1	12.5	1	3	9	1	2	1	2	1	2
388	C9JXC6	C9JXC6		SEC61A1	tr|C9JXC6|C9JXC6_HUMAN Protein transport protein Sec61 subunit alpha isoform 1 (Fragment) OS=Homo sapiens GN=SEC61A1 PE=3 SV=1	33255000	0	6651100	6651100	0	29710000	0	3	1	1	27.7	11.9	11.9	10.817	0.0014993	2.6794	33255000	2	27.7	15.8	2	0	1	3	2	1	0	1	0
389	C9JXF9;P08833;C9J6H2	C9JXF9;P08833;C9J6H2	Insulin-like growth factor-binding protein 1	IGFBP1	tr|C9JXF9|C9JXF9_HUMAN Insulin-like growth factor-binding protein 1 OS=Homo sapiens GN=IGFBP1 PE=4 SV=1;sp|P08833|IBP1_HUMAN Insulin-like growth factor-binding protein 1 OS=Homo sapiens GN=IGFBP1 PE=1 SV=1;tr|C9J6H2|C9J6H2_HUMAN Insulin-like growth factor-	1317000000	1002300000	178410000	101310000	77100000	1379700000	872750000	8	8	8	35	35	35	27.671	0	39.643	2319300000	39	34.6	35	17	22	3	7	8	7	8	7	8
390	K7ENL4;J3QL63;J3QL47;Q96ET8-3;J3KS67;C9JYS5;Q9NYZ1	K7ENL4;J3QL63;J3QL47;Q96ET8-3;J3KS67;C9JYS5;Q9NYZ1	Golgi apparatus membrane protein TVP23 homolog;Golgi apparatus membrane protein TVP23 homolog B	TVP23B;TVP23C	tr|K7ENL4|K7ENL4_HUMAN Golgi apparatus membrane protein TVP23 homolog (Fragment) OS=Homo sapiens GN=TVP23B PE=3 SV=1;tr|J3QL63|J3QL63_HUMAN Golgi apparatus membrane protein TVP23 homolog OS=Homo sapiens GN=TVP23B PE=3 SV=2;tr|J3QL47|J3QL47_HUMAN Golgi appa	0	22226000	2469500	0	2469500	0	25579000	1	1	1	9.1	9.1	9.1	15.323	0	11.064	22226000	2	0	9.1	0	2	7	0	1	0	1	0	1
391	F8WC59;C9JYZ0;Q03154-3;Q03154;C9JMV9;Q03154-4;Q03154-2	F8WC59;C9JYZ0;Q03154-3;Q03154;C9JMV9;Q03154-4	Aminoacylase-1	ACY1;ABHD14A-ACY1	tr|F8WC59|F8WC59_HUMAN Aminoacylase-1 OS=Homo sapiens GN=ACY1 PE=1 SV=1;tr|C9JYZ0|C9JYZ0_HUMAN Aminoacylase-1 (Fragment) OS=Homo sapiens GN=ACY1 PE=1 SV=1;sp|Q03154-3|ACY1_HUMAN Isoform 3 of Aminoacylase-1 OS=Homo sapiens GN=ACY1;sp|Q03154|ACY1_HUMAN Amino	22844000	36732000	5416000	2076700	3339300	33185000	31450000	3	3	3	26.9	26.9	26.9	22.708	0	8.8102	59576000	7	26.9	15.4	4	3	7	3	2	3	2	3	2
392	C9JZR2;O60716-24;O60716-23;O60716-21;O60716-19;O60716-22;O60716-20;O60716-16;O60716-18;O60716-15;O60716-17;O60716-13;O60716-11;O60716-14;O60716-12;O60716-10;O60716-8;O60716-9;O60716-7;O60716-5;O60716-3;O60716-6;O60716-4;O60716-2;O60716;O60716-32;O60716-31;O60716-29;O60716-27;O60716-30;O60716-28;O60716-26;O60716-25;E9PRE2;E9PKY0;H0YC95;E9PKL1	C9JZR2;O60716-24;O60716-23;O60716-21;O60716-19;O60716-22;O60716-20;O60716-16;O60716-18;O60716-15;O60716-17;O60716-13;O60716-11;O60716-14;O60716-12;O60716-10;O60716-8;O60716-9;O60716-7;O60716-5;O60716-3;O60716-6;O60716-4;O60716-2;O60716;O60716-32;O60716-31;O60716-29;O60716-27;O60716-30;O60716-28;O60716-26;O60716-25	Catenin delta-1	CTNND1	tr|C9JZR2|C9JZR2_HUMAN Catenin delta-1 OS=Homo sapiens GN=CTNND1 PE=1 SV=2;sp|O60716-24|CTND1_HUMAN Isoform 3 of Catenin delta-1 OS=Homo sapiens GN=CTNND1;sp|O60716-23|CTND1_HUMAN Isoform 3C of Catenin delta-1 OS=Homo sapiens GN=CTNND1;sp|O60716-21|CTND1_H	4299900000	3191500000	136210000	78181000	58027000	3584800000	3480100000	32	32	32	46.6	46.6	46.6	104.85	0	323.31	7491400000	223	45.2	37.5	111	112	37	30	24	30	24	30	24
393	F8WBF4;C9K0I4;F8WDH1;P56557	F8WBF4;C9K0I4;F8WDH1;P56557	Transmembrane protein 50B	TMEM50B	tr|F8WBF4|F8WBF4_HUMAN Transmembrane protein 50B OS=Homo sapiens GN=TMEM50B PE=1 SV=1;tr|C9K0I4|C9K0I4_HUMAN Transmembrane protein 50B (Fragment) OS=Homo sapiens GN=TMEM50B PE=1 SV=1;tr|F8WDH1|F8WDH1_HUMAN Transmembrane protein 50B OS=Homo sapiens GN=TMEM5	22441000	10947000	11129000	7480300	3649000	22280000	14321000	1	1	1	18.2	18.2	18.2	4.9386	0.0012614	2.7471	33388000	9	18.2	18.2	4	5	4	1	1	1	1	1	1
394	C9K0W8;H3BU86;O14662-2;O14662-4;O14662-5;O14662;O14662-6;Q96NX8;F8W9Z6;B7ZBM8;O14662-3	C9K0W8;H3BU86;O14662-2;O14662-4;O14662-5;O14662;O14662-6	Syntaxin-16	STX16;STX16-NPEPL1	tr|C9K0W8|C9K0W8_HUMAN Syntaxin-16 OS=Homo sapiens GN=STX16 PE=3 SV=2;tr|H3BU86|H3BU86_HUMAN Protein STX16-NPEPL1 OS=Homo sapiens GN=STX16-NPEPL1 PE=3 SV=1;sp|O14662-2|STX16_HUMAN Isoform A of Syntaxin-16 OS=Homo sapiens GN=STX16;sp|O14662-4|STX16_HUMAN Is	110690000	50887000	8504000	5825800	2678300	138530000	69156000	3	3	3	11.1	11.1	11.1	35.081	0	25.049	161580000	12	11.1	7.5	7	5	11	3	2	3	2	3	2
395	D3DPC4;Q53R41;Q53R41-2;E7EW60;C9JTP4;C9JMM4;E9PAL5;A8TX70-2;A8TX70	D3DPC4;Q53R41;Q53R41-2	FAST kinase domain-containing protein 1	FLJ21901;FASTKD1	tr|D3DPC4|D3DPC4_HUMAN FAST kinase domain-containing protein 1 OS=Homo sapiens GN=FLJ21901 PE=1 SV=1;sp|Q53R41|FAKD1_HUMAN FAST kinase domain-containing protein 1 OS=Homo sapiens GN=FASTKD1 PE=1 SV=1;sp|Q53R41-2|FAKD1_HUMAN Isoform 2 of FAST kinase domain-	191210000	214690000	7805900	3677200	4128700	180520000	249060000	11	11	11	18.4	18.4	18.4	94.762	0	28.221	405910000	19	14.6	7	13	6	9	8	5	8	5	8	5
396	H0Y3P2;D3DQV9;P78344-2;P78344;H0YE22;H0YCH5;H0YEC5;H0YD77	H0Y3P2;D3DQV9;P78344-2;P78344	Eukaryotic translation initiation factor 4 gamma 2	EIF4G2	tr|H0Y3P2|H0Y3P2_HUMAN Eukaryotic translation initiation factor 4 gamma 2 OS=Homo sapiens GN=EIF4G2 PE=1 SV=1;tr|D3DQV9|D3DQV9_HUMAN Eukaryotic translation initiation factor 4 gamma 2 (Fragment) OS=Homo sapiens GN=EIF4G2 PE=1 SV=1;sp|P78344-2|IF4G2_HUMAN I	139140000	121550000	4739800	2529900	2209900	107350000	190960000	8	8	3	11.3	11.3	3.7	98.117	0	18.831	260690000	15	11.3	5.3	10	5	8	8	4	8	4	3	1
397	D3DSM6;P41440-2;P41440	D3DSM6;P41440-2;P41440	Folate transporter 1	SLC19A1	tr|D3DSM6|D3DSM6_HUMAN Folate transporter 1 OS=Homo sapiens GN=SLC19A1 PE=1 SV=1;sp|P41440-2|S19A1_HUMAN Isoform 2 of Folate transporter 1 OS=Homo sapiens GN=SLC19A1;sp|P41440|S19A1_HUMAN Folate transporter 1 OS=Homo sapiens GN=SLC19A1 PE=1 SV=3	12729000	0	424310	424310	0	10587000	0	1	1	1	4.9	4.9	4.9	67.199	0	7.713	12729000	1	4.9	0	1	0	3	1	0	1	0	1	0
398	D3DSM8;O95954;O95954-2;B7WPK3;O95954-3;O95954-4	D3DSM8;O95954;O95954-2;B7WPK3;O95954-3	Formimidoyltransferase-cyclodeaminase;Glutamate formimidoyltransferase;Formimidoyltetrahydrofolate cyclodeaminase	FTCD	tr|D3DSM8|D3DSM8_HUMAN Formimidoyltransferase-cyclodeaminase OS=Homo sapiens GN=FTCD PE=4 SV=1;sp|O95954|FTCD_HUMAN Formimidoyltransferase-cyclodeaminase OS=Homo sapiens GN=FTCD PE=1 SV=2;sp|O95954-2|FTCD_HUMAN Isoform C of Formimidoyltransferase-cyclodeam	41555000	35325000	2196600	1187300	1009300	39218000	36590000	8	8	8	21.9	21.9	21.9	63.298	0	16.801	76880000	10	13.9	14.5	6	4	6	5	5	5	5	5	5
399	D3DU01;Q96GC9;K7EPE7;Q96GC9-2;K7EL46;K7EL93;K7EL74;K7ENU2;K7EK01;K7EMI0;K7ELS2	D3DU01;Q96GC9;K7EPE7;Q96GC9-2	Vacuole membrane protein 1	TMEM49;VMP1	tr|D3DU01|D3DU01_HUMAN Transmembrane protein 49, isoform CRA_b OS=Homo sapiens GN=TMEM49 PE=1 SV=1;sp|Q96GC9|VMP1_HUMAN Vacuole membrane protein 1 OS=Homo sapiens GN=VMP1 PE=1 SV=1;tr|K7EPE7|K7EPE7_HUMAN Vacuole membrane protein 1 (Fragment) OS=Homo sapien	226330000	199130000	35456000	18861000	16594000	203680000	169340000	3	3	3	11.2	11.2	11.2	47.554	0	53.907	425470000	16	11.2	11.2	9	7	11	3	3	3	3	3	3
400	D3DVS1	D3DVS1		TMEM128	tr|D3DVS1|D3DVS1_HUMAN Transmembrane protein 128 OS=Homo sapiens GN=TMEM128 PE=4 SV=1	13979000	0	4659700	4659700	0	12489000	0	1	1	1	7.9	7.9	7.9	18.822	0.0012671	2.7771	13979000	2	7.9	0	2	0	1	1	0	1	0	1	0
401	G5E9Q7;D3DWV9;P51553-2;P51553;E7EQB8;E9PF84;H7C1W2;H0Y5Q7	G5E9Q7;D3DWV9;P51553-2;P51553;E7EQB8;E9PF84;H7C1W2;H0Y5Q7	Isocitrate dehydrogenase [NAD] subunit, mitochondrial;Isocitrate dehydrogenase [NAD] subunit gamma, mitochondrial	IDH3G;hCG_2004980	tr|G5E9Q7|G5E9Q7_HUMAN HCG2004980, isoform CRA_d OS=Homo sapiens GN=IDH3G PE=1 SV=1;tr|D3DWV9|D3DWV9_HUMAN HCG2004980, isoform CRA_g OS=Homo sapiens GN=IDH3G PE=1 SV=1;sp|P51553-2|IDH3G_HUMAN Isoform 2 of Isocitrate dehydrogenase [NAD] subunit gamma, mitoc	221090000	0	12283000	12283000	0	195760000	0	6	6	6	29.2	29.2	29.2	35.43	0	20.508	221090000	9	29.2	0	9	0	8	6	0	6	0	6	0
402	D3YTB1;F8W727;P62910;D3YTI8	D3YTB1;F8W727;P62910	60S ribosomal protein L32	RPL32	tr|D3YTB1|D3YTB1_HUMAN 60S ribosomal protein L32 (Fragment) OS=Homo sapiens GN=RPL32 PE=1 SV=1;tr|F8W727|F8W727_HUMAN 60S ribosomal protein L32 OS=Homo sapiens GN=RPL32 PE=1 SV=1;sp|P62910|RL32_HUMAN 60S ribosomal protein L32 OS=Homo sapiens GN=RPL32 PE=1	2765600000	2649900000	773650000	395090000	378560000	2701400000	2705600000	8	8	8	53.4	53.4	53.4	15.616	0	104.26	5415600000	122	53.4	51.9	49	73	4	8	7	8	7	8	7
403	D3YTC7;Q9UBM1;Q9UBM1-3;Q9UBM1-2	D3YTC7;Q9UBM1;Q9UBM1-3;Q9UBM1-2	Phosphatidylethanolamine N-methyltransferase	PEMT	tr|D3YTC7|D3YTC7_HUMAN Phosphatidylethanolamine N-methyltransferase OS=Homo sapiens GN=PEMT PE=4 SV=1;sp|Q9UBM1|PEMT_HUMAN Phosphatidylethanolamine N-methyltransferase OS=Homo sapiens GN=PEMT PE=2 SV=4;sp|Q9UBM1-3|PEMT_HUMAN Isoform 3 of Phosphatidylethano	0	63643000	15911000	0	15911000	0	74027000	1	1	1	6.2	6.2	6.2	22.861	0	22.843	63643000	3	0	6.2	0	3	4	0	1	0	1	0	1
404	E7ENA2;D3YTF9;Q9NNW7-2;Q9NNW7;A0A096LPD9;E7EWK1;D3YTF8;A0A096LPK7;A0A096LNN4;Q9NNW7-3;Q9NNW7-4;A0A096LNY7;A0A096LPH4;A0A096LP96;A0A096LPB7	E7ENA2;D3YTF9;Q9NNW7-2;Q9NNW7;A0A096LPD9;E7EWK1;D3YTF8;A0A096LPK7;A0A096LNN4;Q9NNW7-3	Thioredoxin reductase 2, mitochondrial	TXNRD2	tr|E7ENA2|E7ENA2_HUMAN Thioredoxin reductase 2, mitochondrial OS=Homo sapiens GN=TXNRD2 PE=1 SV=1;tr|D3YTF9|D3YTF9_HUMAN Thioredoxin reductase 2, mitochondrial OS=Homo sapiens GN=TXNRD2 PE=1 SV=1;sp|Q9NNW7-2|TRXR2_HUMAN Isoform 2 of Thioredoxin reductase 2	120400000	101180000	7913700	4300100	3613600	105810000	114060000	8	8	7	24.1	24.1	21.1	53.567	0	25.154	221580000	17	17.4	16	10	7	15	6	5	6	5	6	4
405	D6R938;E9PBG7;E9PF82;Q13557-8;Q13557-12;Q13557-9;Q13557-10;Q13557-5;Q13557;Q13557-3;Q13557-6;Q13557-4;Q13557-11;D6RFJ0;E7ERS6;E9PBE8;E7EQE4;E7ETC9;H0Y9J2;H0Y9C2;H7BXS4;Q5SWX3;Q13554-7;Q9UQM7;Q13554-4;Q9UQM7-2;Q13554-6;Q13555-10;Q13554-3;Q13554-8;Q13554-5;Q13555-3;Q13555-5;Q13555-4;Q13555-7;Q13555-9;Q13554-2;Q13555-2;Q13555-8;Q13555;Q13555-6;Q13554	D6R938;E9PBG7;E9PF82;Q13557-8;Q13557-12;Q13557-9;Q13557-10;Q13557-5;Q13557;Q13557-3;Q13557-6;Q13557-4;Q13557-11	Calcium/calmodulin-dependent protein kinase type II subunit delta	CAMK2D	tr|D6R938|D6R938_HUMAN Calcium/calmodulin-dependent protein kinase (CaM kinase) II delta, isoform CRA_e OS=Homo sapiens GN=CAMK2D PE=1 SV=1;tr|E9PBG7|E9PBG7_HUMAN Calcium/calmodulin-dependent protein kinase type II subunit delta OS=Homo sapiens GN=CAMK2D P	54248000	14936000	2470800	1937400	533420	28488000	33176000	3	3	3	9	9	9	56.298	0.00030157	5.43	69184000	5	9	5	3	2	42	3	1	3	1	3	1
406	D6RF72;D6R9S7;D6R9M9;D6RHE3;D6RDB0;D6R9X6;Q96GZ6-6;Q96GZ6-7;Q96GZ6-5;Q96GZ6-9;Q96GZ6-2;Q96GZ6	D6RF72;D6R9S7;D6R9M9;D6RHE3;D6RDB0;D6R9X6;Q96GZ6-6;Q96GZ6-7;Q96GZ6-5;Q96GZ6-9;Q96GZ6-2;Q96GZ6	Solute carrier family 41 member 3	SLC41A3	tr|D6RF72|D6RF72_HUMAN Solute carrier family 41 member 3 (Fragment) OS=Homo sapiens GN=SLC41A3 PE=4 SV=1;tr|D6R9S7|D6R9S7_HUMAN Solute carrier family 41 member 3 (Fragment) OS=Homo sapiens GN=SLC41A3 PE=4 SV=1;tr|D6R9M9|D6R9M9_HUMAN Solute carrier family 4	22506000	9595700	4012700	2813300	1199500	12541000	9205700	1	1	1	9.4	9.4	9.4	14.87	0.00080386	3.3991	32102000	8	9.4	9.4	3	5	12	1	1	1	1	1	1
407	D6RAY7;D6R9P4;P46926-2;P46926;D6R917;D6RB13;D6RFF8;Q8TDQ7-3;Q8TDQ7-2;Q8TDQ7	D6RAY7;D6R9P4;P46926-2;P46926;D6R917;D6RB13;D6RFF8	Glucosamine-6-phosphate isomerase;Glucosamine-6-phosphate isomerase 1	GNPDA1	tr|D6RAY7|D6RAY7_HUMAN Glucosamine-6-phosphate isomerase (Fragment) OS=Homo sapiens GN=GNPDA1 PE=1 SV=1;tr|D6R9P4|D6R9P4_HUMAN Glucosamine-6-phosphate isomerase OS=Homo sapiens GN=GNPDA1 PE=1 SV=1;sp|P46926-2|GNPI1_HUMAN Isoform 2 of Glucosamine-6-phosphat	64779000	0	4318600	4318600	0	41537000	0	3	3	3	16.5	16.5	16.5	26.987	0	7.6298	64779000	3	16.5	0	3	0	10	3	0	3	0	3	0
408	D6RAV0;D6RFH2;D6R9V8;H0Y8K3;Q9UKY7-3;Q9UKY7-2;Q9UKY7	D6RAV0;D6RFH2;D6R9V8;H0Y8K3;Q9UKY7-3;Q9UKY7-2;Q9UKY7	Protein CDV3 homolog	CDV3	tr|D6RAV0|D6RAV0_HUMAN Protein CDV3 homolog (Fragment) OS=Homo sapiens GN=CDV3 PE=1 SV=1;tr|D6RFH2|D6RFH2_HUMAN Protein CDV3 homolog OS=Homo sapiens GN=CDV3 PE=1 SV=1;tr|D6R9V8|D6R9V8_HUMAN Protein CDV3 homolog OS=Homo sapiens GN=CDV3 PE=1 SV=1;tr|H0Y8K3|H	21130000	20854000	6997200	3521600	3475600	37819000	21815000	1	1	1	34.8	34.8	34.8	9.8697	0	8.3573	41983000	3	34.8	34.8	2	1	7	1	1	1	1	1	1
409	D6R9Z7;P15954	D6R9Z7;P15954	Cytochrome c oxidase subunit 7C, mitochondrial	COX7C	tr|D6R9Z7|D6R9Z7_HUMAN Cytochrome c oxidase subunit 7C, mitochondrial OS=Homo sapiens GN=COX7C PE=1 SV=1;sp|P15954|COX7C_HUMAN Cytochrome c oxidase subunit 7C, mitochondrial OS=Homo sapiens GN=COX7C PE=1 SV=1	292350000	482150000	129080000	48726000	80359000	643890000	231090000	2	2	2	26.8	26.8	26.8	6.3824	0.00029985	5.3043	774510000	8	16.1	26.8	4	4	2	1	2	1	2	1	2
410	D6RA24;Q9NZF1	D6RA24;Q9NZF1	Placenta-specific gene 8 protein	PLAC8	tr|D6RA24|D6RA24_HUMAN Placenta-specific 8, isoform CRA_b OS=Homo sapiens GN=PLAC8 PE=4 SV=1;sp|Q9NZF1|PLAC8_HUMAN Placenta-specific gene 8 protein OS=Homo sapiens GN=PLAC8 PE=2 SV=1	65438000	104970000	85205000	32719000	52486000	100190000	112270000	1	1	1	44.8	44.8	44.8	6.7139	0	8.2944	170410000	8	44.8	44.8	4	4	2	1	1	1	1	1	1
411	D6RA57;H0Y9X1;Q96EY4	D6RA57;H0Y9X1;Q96EY4	Translation machinery-associated protein 16	TMA16	tr|D6RA57|D6RA57_HUMAN Translation machinery-associated protein 16 OS=Homo sapiens GN=TMA16 PE=1 SV=1;tr|H0Y9X1|H0Y9X1_HUMAN Translation machinery-associated protein 16 (Fragment) OS=Homo sapiens GN=TMA16 PE=1 SV=1;sp|Q96EY4|TMA16_HUMAN Translation machine	58948000	44323000	14753000	8421100	6331900	42625000	47812000	1	1	1	13.9	13.9	13.9	17.155	0.00054363	3.6173	103270000	7	13.9	13.9	6	1	3	1	1	1	1	1	1
412	D6RA70;Q9H6S0;D6RF50	D6RA70;Q9H6S0;D6RF50	Probable ATP-dependent RNA helicase YTHDC2	YTHDC2	tr|D6RA70|D6RA70_HUMAN Probable ATP-dependent RNA helicase YTHDC2 OS=Homo sapiens GN=YTHDC2 PE=1 SV=1;sp|Q9H6S0|YTDC2_HUMAN Probable ATP-dependent RNA helicase YTHDC2 OS=Homo sapiens GN=YTHDC2 PE=1 SV=2;tr|D6RF50|D6RF50_HUMAN Probable ATP-dependent RNA hel	2494400	0	56691	56691	0	1583700	0	2	2	2	4.2	4.2	4.2	82.988	0.0012547	2.7123	2494400	2	4.2	0	2	0	3	2	0	2	0	2	0
413	D6RAF2;Q6PIY7-2;Q6PIY7	D6RAF2;Q6PIY7-2;Q6PIY7	Poly(A) RNA polymerase GLD2	PAPD4	tr|D6RAF2|D6RAF2_HUMAN Poly(A) RNA polymerase GLD2 OS=Homo sapiens GN=PAPD4 PE=1 SV=1;sp|Q6PIY7-2|GLD2_HUMAN Isoform 2 of Poly(A) RNA polymerase GLD2 OS=Homo sapiens GN=PAPD4;sp|Q6PIY7|GLD2_HUMAN Poly(A) RNA polymerase GLD2 OS=Homo sapiens GN=PAPD4 PE=1 SV	142700000	0	5946000	5946000	0	206800000	0	1	1	1	2.7	2.7	2.7	51.054	1	-2	142700000	1	2.7	0	1	0	3	1	0	1	0	1	0
414	D6RAM3;Q7L591	D6RAM3;Q7L591	Docking protein 3	DOK3	tr|D6RAM3|D6RAM3_HUMAN Docking protein 3 OS=Homo sapiens GN=DOK3 PE=1 SV=1;sp|Q7L591|DOK3_HUMAN Docking protein 3 OS=Homo sapiens GN=DOK3 PE=1 SV=2	39065000	0	1502500	1502500	0	34845000	0	1	1	1	1.8	1.8	1.8	47.601	0.0043764	2.3165	39065000	2	1.8	0	2	0	2	1	0	1	0	1	0
415	D6RAN8;Q9P0M9;H7C5U8;D6RE11;B3KN43	D6RAN8;Q9P0M9;H7C5U8	39S ribosomal protein L27, mitochondrial	MRPL27	tr|D6RAN8|D6RAN8_HUMAN 39S ribosomal protein L27, mitochondrial OS=Homo sapiens GN=MRPL27 PE=1 SV=1;sp|Q9P0M9|RM27_HUMAN 39S ribosomal protein L27, mitochondrial OS=Homo sapiens GN=MRPL27 PE=1 SV=1;tr|H7C5U8|H7C5U8_HUMAN 39S ribosomal protein L27, mitochon	446050000	393550000	104950000	55757000	49194000	681740000	417800000	4	4	4	57	57	57	10.474	0	23.538	839610000	20	45.2	39.8	11	9	5	3	3	3	3	3	3
416	D6RFM7;D6RAP6;Q9UJX5-2;Q9UJX5;Q9UJX5-3	D6RFM7;D6RAP6;Q9UJX5-2;Q9UJX5;Q9UJX5-3	Anaphase-promoting complex subunit 4	ANAPC4	tr|D6RFM7|D6RFM7_HUMAN Anaphase-promoting complex subunit 4 OS=Homo sapiens GN=ANAPC4 PE=4 SV=1;tr|D6RAP6|D6RAP6_HUMAN Anaphase-promoting complex subunit 4 (Fragment) OS=Homo sapiens GN=ANAPC4 PE=4 SV=1;sp|Q9UJX5-2|APC4_HUMAN Isoform 2 of Anaphase-promotin	5230800	4332000	1593800	871800	722000	5230800	4985600	1	1	1	19.3	19.3	19.3	9.7085	0.0067195	2.1639	9562800	4	19.3	19.3	3	1	5	1	1	1	1	1	1
417	D6RAR6;Q14CZ7	D6RAR6;Q14CZ7	FAST kinase domain-containing protein 3	FASTKD3	tr|D6RAR6|D6RAR6_HUMAN FAST kinase domain-containing protein 3 OS=Homo sapiens GN=FASTKD3 PE=4 SV=1;sp|Q14CZ7|FAKD3_HUMAN FAST kinase domain-containing protein 3 OS=Homo sapiens GN=FASTKD3 PE=2 SV=2	39723000	9861400	1340100	1073600	266520	16606000	28501000	4	4	4	9.7	9.7	9.7	69.381	0	10.731	49584000	7	9.7	2.3	6	1	2	4	1	4	1	4	1
418	D6RAX7;D6RFN0;Q9BT78;D6RD63;Q9BT78-2	D6RAX7;D6RFN0;Q9BT78;D6RD63;Q9BT78-2	COP9 signalosome complex subunit 4	COPS4	tr|D6RAX7|D6RAX7_HUMAN COP9 signalosome complex subunit 4 OS=Homo sapiens GN=COPS4 PE=1 SV=1;tr|D6RFN0|D6RFN0_HUMAN COP9 signalosome complex subunit 4 OS=Homo sapiens GN=COPS4 PE=1 SV=1;sp|Q9BT78|CSN4_HUMAN COP9 signalosome complex subunit 4 OS=Homo sapien	50532000	36098000	3331900	1943500	1388400	45302000	38041000	5	5	5	16.4	16.4	16.4	47.726	0	8.0558	86629000	4	10.5	8.8	2	2	5	3	3	3	3	3	3
419	D6RB81;Q9UHK6;Q9UHK6-5;V9GZ45;V9GYP4;V9GYU9;Q9UHK6-4;Q9UHK6-2	D6RB81;Q9UHK6;Q9UHK6-5;V9GZ45;V9GYP4	Alpha-methylacyl-CoA racemase	AMACR	tr|D6RB81|D6RB81_HUMAN Alpha-methylacyl-CoA racemase OS=Homo sapiens GN=AMACR PE=4 SV=1;sp|Q9UHK6|AMACR_HUMAN Alpha-methylacyl-CoA racemase OS=Homo sapiens GN=AMACR PE=1 SV=2;sp|Q9UHK6-5|AMACR_HUMAN Isoform 4 of Alpha-methylacyl-CoA racemase OS=Homo sapien	67355000	0	3545000	3545000	0	62668000	0	3	3	3	11.4	11.4	11.4	40.674	0.00029647	5.0308	67355000	5	11.4	0	5	0	8	3	0	3	0	3	0
420	D6RBS5;Q8IZ81;D6RHX2;V9GY58	D6RBS5;Q8IZ81;D6RHX2	ELMO domain-containing protein 2	ELMOD2	tr|D6RBS5|D6RBS5_HUMAN ELMO domain-containing protein 2 (Fragment) OS=Homo sapiens GN=ELMOD2 PE=1 SV=3;sp|Q8IZ81|ELMD2_HUMAN ELMO domain-containing protein 2 OS=Homo sapiens GN=ELMOD2 PE=1 SV=1;tr|D6RHX2|D6RHX2_HUMAN ELMO domain-containing protein 2 (Fragm	150250000	69918000	20015000	13659000	6356200	71396000	120760000	7	7	7	51.8	51.8	51.8	20.204	0	33.294	220170000	22	45.8	23.2	14	8	4	6	4	6	4	6	4
421	D6RBW1;P06730;P06730-3;P06730-2	D6RBW1;P06730;P06730-3;P06730-2	Eukaryotic translation initiation factor 4E	EIF4E	tr|D6RBW1|D6RBW1_HUMAN Eukaryotic translation initiation factor 4E OS=Homo sapiens GN=EIF4E PE=1 SV=1;sp|P06730|IF4E_HUMAN Eukaryotic translation initiation factor 4E OS=Homo sapiens GN=EIF4E PE=1 SV=2;sp|P06730-3|IF4E_HUMAN Isoform 3 of Eukaryotic transla	80506000	15676000	6011400	5031700	979750	54575000	34382000	1	1	1	5.7	5.7	5.7	28.512	0.00031686	6.6488	96182000	4	5.7	5.7	2	2	4	1	1	1	1	1	1
422	D6RC52;D6RCB9;Q9NX24;H0YC83;J3QSY4	D6RC52;D6RCB9;Q9NX24;H0YC83;J3QSY4	H/ACA ribonucleoprotein complex subunit 2	NHP2	tr|D6RC52|D6RC52_HUMAN H/ACA ribonucleoprotein complex subunit 2 (Fragment) OS=Homo sapiens GN=NHP2 PE=1 SV=1;tr|D6RCB9|D6RCB9_HUMAN H/ACA ribonucleoprotein complex subunit 2 (Fragment) OS=Homo sapiens GN=NHP2 PE=1 SV=1;sp|Q9NX24|NHP2_HUMAN H/ACA ribonucle	417730000	740480000	231640000	83545000	148100000	979680000	637460000	4	4	4	55.3	55.3	55.3	15.017	0	156.01	1158200000	27	14.4	55.3	9	18	5	1	4	1	4	1	4
423	D6RCM7;Q8TEZ7	D6RCM7;Q8TEZ7	Membrane progestin receptor beta	PAQR8	tr|D6RCM7|D6RCM7_HUMAN Membrane progestin receptor beta (Fragment) OS=Homo sapiens GN=PAQR8 PE=4 SV=1;sp|Q8TEZ7|MPRB_HUMAN Membrane progestin receptor beta OS=Homo sapiens GN=PAQR8 PE=2 SV=1	37046000	8658100	5713100	4630800	1082300	24610000	25777000	2	2	2	24.1	24.1	24.1	12.982	0.00057094	4.3058	45705000	4	24.1	10.7	3	1	2	2	1	2	1	2	1
424	D6REP8;D6RE99;D6RD60;P49773	D6REP8;D6RE99;D6RD60;P49773	Histidine triad nucleotide-binding protein 1	HINT1	tr|D6REP8|D6REP8_HUMAN Histidine triad nucleotide-binding protein 1 OS=Homo sapiens GN=HINT1 PE=1 SV=1;tr|D6RE99|D6RE99_HUMAN Histidine triad nucleotide-binding protein 1 OS=Homo sapiens GN=HINT1 PE=1 SV=1;tr|D6RD60|D6RD60_HUMAN Histidine triad nucleotide-	72234000	72051000	28857000	14447000	14410000	43556000	74590000	1	1	1	25.6	25.6	25.6	8.7079	0.00029878	5.2358	144290000	3	25.6	25.6	2	1	4	1	1	1	1	1	1
425	D6RIZ4;D6RE79;Q14728;D6RA47	D6RIZ4;D6RE79;Q14728;D6RA47	Major facilitator superfamily domain-containing protein 10	MFSD10	tr|D6RIZ4|D6RIZ4_HUMAN Major facilitator superfamily domain-containing protein 10 OS=Homo sapiens GN=MFSD10 PE=4 SV=1;tr|D6RE79|D6RE79_HUMAN Major facilitator superfamily domain-containing protein 10 OS=Homo sapiens GN=MFSD10 PE=4 SV=1;sp|Q14728|MFS10_HUMA	149000000	53588000	12662000	9312800	3349300	144030000	82432000	3	3	3	9.3	9.3	9.3	38.247	0	18.603	202590000	7	9.3	3.7	4	3	4	3	1	3	1	3	1
426	D6REA0;O75879;D6RDU9;H0Y9W6;H0Y8G7;H0Y9F2;B4E0P2	D6REA0;O75879	Glutamyl-tRNA(Gln) amidotransferase subunit B, mitochondrial	PET112;GATB	tr|D6REA0|D6REA0_HUMAN Glutamyl-tRNA(Gln) amidotransferase subunit B, mitochondrial OS=Homo sapiens GN=PET112 PE=3 SV=1;sp|O75879|GATB_HUMAN Glutamyl-tRNA(Gln) amidotransferase subunit B, mitochondrial OS=Homo sapiens GN=GATB PE=1 SV=1	173890000	86028000	8663800	5796200	2867600	140170000	121170000	7	7	7	31	31	31	57.653	0	51.27	259910000	18	27.7	11.4	11	7	7	6	3	6	3	6	3
427	D6REA1;Q9H173;D6RIU8	D6REA1;Q9H173	Nucleotide exchange factor SIL1	SIL1	tr|D6REA1|D6REA1_HUMAN Nucleotide exchange factor SIL1 OS=Homo sapiens GN=SIL1 PE=1 SV=1;sp|Q9H173|SIL1_HUMAN Nucleotide exchange factor SIL1 OS=Homo sapiens GN=SIL1 PE=1 SV=1	46042000	50604000	4602200	2192500	2409700	61164000	53812000	3	3	3	7.5	7.5	7.5	52.748	0.00032216	7.0512	96646000	11	7.5	4.3	5	6	3	3	2	3	2	3	2
428	D6REL0;Q9NRR3	D6REL0;Q9NRR3	CDC42 small effector protein 2	CDC42SE2	tr|D6REL0|D6REL0_HUMAN CDC42 small effector protein 2 OS=Homo sapiens GN=CDC42SE2 PE=4 SV=1;sp|Q9NRR3|C42S2_HUMAN CDC42 small effector protein 2 OS=Homo sapiens GN=CDC42SE2 PE=1 SV=1	7661800	0	7661800	7661800	0	6372300	0	1	1	1	33.3	33.3	33.3	5.8705	0.0010347	2.9973	7661800	0	33.3	0	0	0	2	1	0	1	0	1	0
429	D6RGI3;D6RER5;Q9NVA2;H0Y961;Q9NVA2-2;H0Y9G8;D6RDU5;B1AMS2;Q14141-2;Q14141-4;Q14141	D6RGI3;D6RER5;Q9NVA2;H0Y961;Q9NVA2-2	Septin-11	2011-09-01	tr|D6RGI3|D6RGI3_HUMAN Septin 11, isoform CRA_b OS=Homo sapiens GN=SEPT11 PE=1 SV=1;tr|D6RER5|D6RER5_HUMAN Septin-11 OS=Homo sapiens GN=SEPT11 PE=1 SV=1;sp|Q9NVA2|SEP11_HUMAN Septin-11 OS=Homo sapiens GN=SEPT11 PE=1 SV=3;tr|H0Y961|H0Y961_HUMAN Septin-11 (F	92901000	0	3573100	3573100	0	67313000	0	3	3	3	9.2	9.2	9.2	49.005	0.00030618	5.7353	92901000	4	9.2	0	4	0	11	3	0	3	0	3	0
430	D6REX3;O94979-6;O94979-3;O94979-10;O94979-4;O94979-9;O94979-2;O94979;O94979-8;D6RHZ5;H7BXG7;O94979-7;O94979-5;H0YAB3;H0Y8V7;H0Y9K1;H0Y8W8;H0YAF5;H0Y9T9;D6RBT0;D6RHE8;D6RE64;D6RCQ9;H0Y9V3	D6REX3;O94979-6;O94979-3;O94979-10;O94979-4;O94979-9;O94979-2;O94979;O94979-8;D6RHZ5;H7BXG7;O94979-7;O94979-5;H0YAB3	Protein transport protein Sec31A	SEC31A	tr|D6REX3|D6REX3_HUMAN Protein transport protein Sec31A OS=Homo sapiens GN=SEC31A PE=1 SV=1;sp|O94979-6|SC31A_HUMAN Isoform 6 of Protein transport protein Sec31A OS=Homo sapiens GN=SEC31A;sp|O94979-3|SC31A_HUMAN Isoform 3 of Protein transport protein Sec31	702750000	257420000	18116000	13259000	4856900	539240000	356710000	16	16	16	17.9	17.9	17.9	136.22	0	108.75	960160000	38	16.3	9.4	20	18	24	15	8	15	8	15	8
431	D6RF48;Q9P2W9;D6RC71;D6RD65;H0YAL4	D6RF48;Q9P2W9;D6RC71;D6RD65	Syntaxin-18	STX18	tr|D6RF48|D6RF48_HUMAN Syntaxin-18 OS=Homo sapiens GN=STX18 PE=1 SV=1;sp|Q9P2W9|STX18_HUMAN Syntaxin-18 OS=Homo sapiens GN=STX18 PE=1 SV=1;tr|D6RC71|D6RC71_HUMAN Syntaxin-18 (Fragment) OS=Homo sapiens GN=STX18 PE=1 SV=1;tr|D6RD65|D6RD65_HUMAN Syntaxin-18 (	276660000	304230000	25256000	12028000	13227000	312190000	230030000	9	9	9	43.5	43.5	43.5	35.42	0	116.14	580880000	30	21.8	33.4	16	14	5	5	7	5	7	5	7
432	E7EM50;D6RFE8;E7EWV1;Q5H8A4-4;Q5H8A4-2;Q5H8A4;Q5H8A4-5;Q5H8A4-6;Q5H8A4-3;D6R9J9	E7EM50;D6RFE8;E7EWV1;Q5H8A4-4;Q5H8A4-2;Q5H8A4;Q5H8A4-5;Q5H8A4-6;Q5H8A4-3	GPI ethanolamine phosphate transferase 2	PIGG	tr|E7EM50|E7EM50_HUMAN GPI ethanolamine phosphate transferase 2 OS=Homo sapiens GN=PIGG PE=4 SV=1;tr|D6RFE8|D6RFE8_HUMAN GPI ethanolamine phosphate transferase 2 OS=Homo sapiens GN=PIGG PE=4 SV=1;tr|E7EWV1|E7EWV1_HUMAN GPI ethanolamine phosphate transferas	184710000	95553000	10779000	7104200	3675100	132520000	114170000	5	5	5	14	14	14	51.236	0	12.12	280260000	11	14	11.7	7	4	10	5	4	5	4	5	4
433	D6RG15;Q6IBS0;H0Y858	D6RG15;Q6IBS0;H0Y858	Twinfilin-2	TWF2	tr|D6RG15|D6RG15_HUMAN Twinfilin-2 OS=Homo sapiens GN=TWF2 PE=1 SV=1;sp|Q6IBS0|TWF2_HUMAN Twinfilin-2 OS=Homo sapiens GN=TWF2 PE=1 SV=2;tr|H0Y858|H0Y858_HUMAN Uncharacterized protein (Fragment) OS=Homo sapiens PE=4 SV=1	799870000	587480000	77075000	44437000	32638000	747090000	442930000	4	4	4	27.2	27.2	27.2	28.882	0	35.191	1387300000	16	27.2	27.2	8	8	3	4	4	4	4	4	4
434	D6RIT7;D6RGC9;R4GMS9;D6RJD3;D6RID8;Q6P1K8;Q13888;D6RAW1	D6RIT7;D6RGC9;R4GMS9;D6RJD3;D6RID8;Q6P1K8;Q13888;D6RAW1	General transcription factor IIH subunit 2-like protein;General transcription factor IIH subunit 2	GTF2H2C;GTF2H2	tr|D6RIT7|D6RIT7_HUMAN General transcription factor IIH subunit 2-like protein OS=Homo sapiens GN=GTF2H2C PE=1 SV=1;tr|D6RGC9|D6RGC9_HUMAN General transcription factor IIH subunit 2 OS=Homo sapiens GN=GTF2H2C PE=1 SV=1;tr|R4GMS9|R4GMS9_HUMAN General transc	9211100	2060700	1127200	921110	206070	0	2518100	2	2	2	19.6	19.6	19.6	10.964	0.0041484	2.3585	11272000	2	9.8	9.8	2	0	8	1	1	1	1	1	1
435	D6RIE3;D6RGV5;H0UI06;P14406;D6R9C3	D6RIE3;D6RGV5;H0UI06;P14406;D6R9C3	Cytochrome c oxidase subunit 7A2, mitochondrial	COX7A2	tr|D6RIE3|D6RIE3_HUMAN Uncharacterized protein OS=Homo sapiens GN=COX7A2 PE=1 SV=1;tr|D6RGV5|D6RGV5_HUMAN Cytochrome c oxidase subunit 7A2, mitochondrial (Fragment) OS=Homo sapiens GN=COX7A2 PE=1 SV=1;tr|H0UI06|H0UI06_HUMAN Cytochrome c oxidase subunit 7A2	1375700000	860520000	372700000	229280000	143420000	881750000	941970000	2	2	2	25.3	25.3	25.3	10.264	0	15.973	2236200000	23	25.3	25.3	14	9	5	2	2	2	2	2	2
436	D6RHC4;E9PDP5;H0YM23;Q8IWZ3-5;Q8IWZ3-3;Q8IWZ3-2;O75179-5;O75179-3;O75179-4;O75179-6;O75179-7;Q8IWZ3;Q8IWZ3-4;O75179-2;O75179;Q8IWZ3-6	D6RHC4;E9PDP5;H0YM23;Q8IWZ3-5;Q8IWZ3-3;Q8IWZ3-2;O75179-5;O75179-3;O75179-4;O75179-6;O75179-7;Q8IWZ3;Q8IWZ3-4;O75179-2;O75179;Q8IWZ3-6	Ankyrin repeat and KH domain-containing protein 1;Ankyrin repeat domain-containing protein 17	ANKHD1;ANKRD17	tr|D6RHC4|D6RHC4_HUMAN Ankyrin repeat and KH domain-containing protein 1 (Fragment) OS=Homo sapiens GN=ANKHD1 PE=1 SV=1;tr|E9PDP5|E9PDP5_HUMAN Ankyrin repeat and KH domain-containing protein 1 (Fragment) OS=Homo sapiens GN=ANKHD1 PE=1 SV=1;tr|H0YM23|H0YM23	9924800	0	763440	763440	0	14382000	0	1	1	1	4.9	4.9	4.9	37.524	0.00079072	3.2288	9924800	1	4.9	0	1	0	16	1	0	1	0	1	0
437	D6RHD2;O43609	D6RHD2;O43609	Protein sprouty homolog 1	SPRY1	tr|D6RHD2|D6RHD2_HUMAN Protein sprouty homolog 1 (Fragment) OS=Homo sapiens GN=SPRY1 PE=1 SV=1;sp|O43609|SPY1_HUMAN Protein sprouty homolog 1 OS=Homo sapiens GN=SPRY1 PE=1 SV=2	19136000	15991000	2702100	1472000	1230100	0	20612000	2	2	2	10	10	10	22.882	0.0024771	2.572	35127000	2	4.8	10	0	2	2	1	2	1	2	1	2
438	H0Y9K8;D6RJF0;D6RHD3;Q9BS16;D6RC76	H0Y9K8;D6RJF0;D6RHD3;Q9BS16;D6RC76	Centromere protein K	CENPK	tr|H0Y9K8|H0Y9K8_HUMAN Centromere protein K (Fragment) OS=Homo sapiens GN=CENPK PE=4 SV=1;tr|D6RJF0|D6RJF0_HUMAN Centromere protein K OS=Homo sapiens GN=CENPK PE=4 SV=1;tr|D6RHD3|D6RHD3_HUMAN Centromere protein K OS=Homo sapiens GN=CENPK PE=4 SV=1;sp|Q9BS1	845540000	921890000	294570000	140920000	153650000	871940000	878510000	2	2	2	17.5	17.5	17.5	16.07	0.00030404	5.5988	1767400000	11	17.5	17.5	7	4	5	2	2	2	2	2	2
439	D6RHI9;O00584;H0YAE9;D6REQ6	D6RHI9;O00584;H0YAE9;D6REQ6	Ribonuclease T2	RNASET2	tr|D6RHI9|D6RHI9_HUMAN Ribonuclease T2 (Fragment) OS=Homo sapiens GN=RNASET2 PE=1 SV=3;sp|O00584|RNT2_HUMAN Ribonuclease T2 OS=Homo sapiens GN=RNASET2 PE=1 SV=2;tr|H0YAE9|H0YAE9_HUMAN Uncharacterized protein (Fragment) OS=Homo sapiens PE=3 SV=1;tr|D6REQ6|D	344520000	237730000	32347000	19140000	13207000	300250000	188270000	6	6	1	30.7	30.7	6.7	29.215	0	198.09	582250000	22	25.2	28.3	12	10	4	5	5	5	5	1	1
440	D6RIY6;Q06265;Q06265-2;D6R905;Q06265-3;Q06265-4;H0Y9L5;D6RAP4;D6RA17	D6RIY6;Q06265;Q06265-2;D6R905;Q06265-3;Q06265-4;H0Y9L5	Exosome complex component RRP45	EXOSC9	tr|D6RIY6|D6RIY6_HUMAN Exosome complex component RRP45 OS=Homo sapiens GN=EXOSC9 PE=1 SV=1;sp|Q06265|EXOS9_HUMAN Exosome complex component RRP45 OS=Homo sapiens GN=EXOSC9 PE=1 SV=3;sp|Q06265-2|EXOS9_HUMAN Isoform 2 of Exosome complex component RRP45 OS=Hom	263340000	147930000	24192000	15490000	8701600	189800000	228670000	4	4	4	11.6	11.6	11.6	46.977	0	27.721	411260000	15	11.6	8	8	7	9	4	3	4	3	4	3
441	D6RJ07;Q9UL40-3;Q9UL40;Q9UL40-2;B7Z6B6;B7Z6Q2	D6RJ07;Q9UL40-3;Q9UL40;Q9UL40-2;B7Z6B6;B7Z6Q2	Zinc finger protein 346	ZNF346	tr|D6RJ07|D6RJ07_HUMAN Zinc finger protein 346 OS=Homo sapiens GN=ZNF346 PE=1 SV=1;sp|Q9UL40-3|ZN346_HUMAN Isoform 3 of Zinc finger protein 346 OS=Homo sapiens GN=ZNF346;sp|Q9UL40|ZN346_HUMAN Zinc finger protein 346 OS=Homo sapiens GN=ZNF346 PE=1 SV=1;sp|Q	7604500	41743000	3084200	475280	2608900	15123000	39282000	2	2	1	9	9	3.5	34.645	0.00031182	6.1538	49348000	4	3.5	9	0	4	6	1	2	1	2	1	1
442	K7ENX8;K7ELV6;K7EJV5;K7ELT6;K7EJV1;K7EMY9;K7EPM4;K7ER40;K7EQR7;D6W5Y5;Q14011;Q14011-2;K7EQX4;K7ENN6;K7EIF7;K7EQL0	K7ENX8;K7ELV6;K7EJV5;K7ELT6;K7EJV1;K7EMY9;K7EPM4;K7ER40;K7EQR7;D6W5Y5;Q14011;Q14011-2	Cold-inducible RNA-binding protein	CIRBP	tr|K7ENX8|K7ENX8_HUMAN Cold-inducible RNA-binding protein (Fragment) OS=Homo sapiens GN=CIRBP PE=1 SV=2;tr|K7ELV6|K7ELV6_HUMAN Cold-inducible RNA-binding protein (Fragment) OS=Homo sapiens GN=CIRBP PE=1 SV=2;tr|K7EJV5|K7EJV5_HUMAN Cold-inducible RNA-bindin	227560000	118260000	69164000	45511000	23653000	168800000	162390000	3	3	3	57.5	57.5	57.5	8.9138	0	44.669	345820000	26	57.5	43.8	16	10	16	3	2	3	2	3	2
443	D6W648;Q9P1Y5;Q9P1Y5-2	D6W648;Q9P1Y5;Q9P1Y5-2	Calmodulin-regulated spectrin-associated protein 3	hCG_2004001;CAMSAP3	tr|D6W648|D6W648_HUMAN Calmodulin-regulated spectrin-associated protein 3 OS=Homo sapiens GN=CAMSAP3 PE=1 SV=1;sp|Q9P1Y5|CAMP3_HUMAN Calmodulin-regulated spectrin-associated protein 3 OS=Homo sapiens GN=CAMSAP3 PE=1 SV=2;sp|Q9P1Y5-2|CAMP3_HUMAN Isoform 2 o	0	13265000	181720	0	181720	0	15756000	2	2	2	3.9	3.9	3.9	136.18	0.00030303	5.5254	13265000	3	0	3.9	0	3	3	0	2	0	2	0	2
444	E1P5H9;Q96BD0-2;Q96BD0-3;Q96BD0-4;Q96BD0	E1P5H9;Q96BD0-2;Q96BD0-3;Q96BD0-4;Q96BD0	Solute carrier organic anion transporter family member 4A1	SLCO4A1	tr|E1P5H9|E1P5H9_HUMAN Solute carrier organic anion transporter family member 4A1 OS=Homo sapiens GN=SLCO4A1 PE=1 SV=1;sp|Q96BD0-2|SO4A1_HUMAN Isoform 2 of Solute carrier organic anion transporter family member 4A1 OS=Homo sapiens GN=SLCO4A1;sp|Q96BD0-3|SO	4554300	0	198010	198010	0	4068800	0	1	1	1	3.1	3.1	3.1	65.837	0.00030294	5.5248	4554300	3	3.1	3.1	2	1	5	1	1	1	1	1	1
445	E5KLJ5;O60313-2;E5KLK1;E5KLJ6;E5KLJ9;O60313;H7C141;H7C321;C9JMB8;C9JY58;A8MXB6;REV__X1WI24;REV__Q9ULE4;REV__B8ZZI7;REV__Q6ZRH7	E5KLJ5;O60313-2;E5KLK1;E5KLJ6;E5KLJ9;O60313	Dynamin-like 120 kDa protein, mitochondrial;Dynamin-like 120 kDa protein, form S1	OPA1	tr|E5KLJ5|E5KLJ5_HUMAN Dynamin-like 120 kDa protein, mitochondrial OS=Homo sapiens GN=OPA1 PE=1 SV=1;sp|O60313-2|OPA1_HUMAN Isoform 2 of Dynamin-like 120 kDa protein, mitochondrial OS=Homo sapiens GN=OPA1;tr|E5KLK1|E5KLK1_HUMAN Dynamin-like 120 kDa protein	1639600000	1511400000	45667000	23763000	21905000	1526000000	1624000000	32	32	32	40.1	40.1	40.1	117.74	0	199.82	3151000000	125	32.7	32.8	66	59	15	25	26	25	26	25	26
446	E5RGS2;Q9H6H4;Q9H6H4-2	E5RGS2;Q9H6H4;Q9H6H4-2	Receptor expression-enhancing protein;Receptor expression-enhancing protein 4	REEP4	tr|E5RGS2|E5RGS2_HUMAN Receptor expression-enhancing protein 4 OS=Homo sapiens GN=REEP4 PE=1 SV=1;sp|Q9H6H4|REEP4_HUMAN Receptor expression-enhancing protein 4 OS=Homo sapiens GN=REEP4 PE=1 SV=1;sp|Q9H6H4-2|REEP4_HUMAN Isoform 2 of Receptor expression-enha	64494000	31159000	6376900	4299600	2077200	50294000	0	4	4	4	21.9	21.9	21.9	28.214	0	9.4906	95653000	8	16.3	12.7	5	3	3	3	3	3	3	3	3
447	H0YAY9;H0YC64;E5RGT2;E5RJN2;E5RHU1;E5RJI9;Q96MH6-2;Q96MH6	H0YAY9;H0YC64;E5RGT2;E5RJN2;E5RHU1;E5RJI9;Q96MH6-2;Q96MH6	Transmembrane protein 68	TMEM68	tr|H0YAY9|H0YAY9_HUMAN Transmembrane protein 68 (Fragment) OS=Homo sapiens GN=TMEM68 PE=4 SV=1;tr|H0YC64|H0YC64_HUMAN Transmembrane protein 68 (Fragment) OS=Homo sapiens GN=TMEM68 PE=4 SV=1;tr|E5RGT2|E5RGT2_HUMAN Transmembrane protein 68 OS=Homo sapiens GN	0	12693000	2115400	0	2115400	0	14608000	1	1	1	19.4	19.4	19.4	7.3034	0.0012778	2.8761	12693000	1	0	19.4	0	1	8	0	1	0	1	0	1
448	E5RIW3;E5RJD8;E5RHG6;O75347;O75347-2	E5RIW3;E5RJD8;E5RHG6;O75347;O75347-2	Tubulin-specific chaperone A	TBCA	tr|E5RIW3|E5RIW3_HUMAN Tubulin-specific chaperone A OS=Homo sapiens GN=TBCA PE=1 SV=1;tr|E5RJD8|E5RJD8_HUMAN Tubulin-specific chaperone A OS=Homo sapiens GN=TBCA PE=1 SV=1;tr|E5RHG6|E5RHG6_HUMAN Tubulin-specific chaperone A OS=Homo sapiens GN=TBCA PE=1 SV=	71095000	52188000	17612000	10156000	7455500	33144000	42380000	2	2	2	34.5	34.5	34.5	10.08	0.00032185	7.0353	123280000	3	34.5	21.4	1	2	5	2	1	2	1	2	1
449	E5RJB8;E5RHU3;E7ESK6;E9PBI9;P34741	E5RJB8;E5RHU3;E7ESK6;E9PBI9;P34741	Syndecan;Syndecan-2	SDC2	tr|E5RJB8|E5RJB8_HUMAN Syndecan-2 (Fragment) OS=Homo sapiens GN=SDC2 PE=1 SV=1;tr|E5RHU3|E5RHU3_HUMAN Syndecan-2 (Fragment) OS=Homo sapiens GN=SDC2 PE=1 SV=2;tr|E7ESK6|E7ESK6_HUMAN Syndecan OS=Homo sapiens GN=SDC2 PE=1 SV=1;tr|E9PBI9|E9PBI9_HUMAN Syndecan	22644000	22704000	5668600	2830600	2838000	22644000	21782000	2	2	2	16.8	16.8	16.8	14.905	0	20.975	45349000	4	16.8	10.9	3	1	5	2	1	2	1	2	1
450	E5RI99;P62888;E5RJH3	E5RI99;P62888;E5RJH3	60S ribosomal protein L30	RPL30	tr|E5RI99|E5RI99_HUMAN 60S ribosomal protein L30 (Fragment) OS=Homo sapiens GN=RPL30 PE=1 SV=1;sp|P62888|RL30_HUMAN 60S ribosomal protein L30 OS=Homo sapiens GN=RPL30 PE=1 SV=2;tr|E5RJH3|E5RJH3_HUMAN 60S ribosomal protein L30 OS=Homo sapiens GN=RPL30 PE=1	3458300000	3083800000	817760000	432290000	385470000	3075300000	2264400000	9	9	9	70.2	70.2	70.2	12.656	0	323.31	6542100000	93	64	70.2	49	44	3	7	8	7	8	7	8
451	E5RIT6;Q9UNX3;E5RHH1;J3KS10;H7C1F9;Q2PPJ7-3;Q2PPJ7-2;Q2PPJ7	E5RIT6;Q9UNX3;E5RHH1	60S ribosomal protein L26-like 1	RPL26L1	tr|E5RIT6|E5RIT6_HUMAN 60S ribosomal protein L26-like 1 (Fragment) OS=Homo sapiens GN=RPL26L1 PE=1 SV=1;sp|Q9UNX3|RL26L_HUMAN 60S ribosomal protein L26-like 1 OS=Homo sapiens GN=RPL26L1 PE=1 SV=1;tr|E5RHH1|E5RHH1_HUMAN 60S ribosomal protein L26-like 1 (Fra	73741000	4058400	9724900	9217600	507300	49522000	17019000	9	1	1	49.2	7	7	15.207	0	8.8652	77800000	7	49.2	42.2	5	2	8	9	7	1	1	1	1
452	H0YBZ4;E5RJS5;Q15390-2;Q15390;H7C5V5;H0YF01	H0YBZ4;E5RJS5;Q15390-2;Q15390;H7C5V5;H0YF01	Mitochondrial fission regulator 1	MTFR1	tr|H0YBZ4|H0YBZ4_HUMAN Mitochondrial fission regulator 1 (Fragment) OS=Homo sapiens GN=MTFR1 PE=1 SV=1;tr|E5RJS5|E5RJS5_HUMAN Uncharacterized protein OS=Homo sapiens GN=MTFR1 PE=1 SV=1;sp|Q15390-2|MTFR1_HUMAN Isoform 2 of Mitochondrial fission regulator 1	20535000	0	1579600	1579600	0	18922000	0	2	2	2	8.2	8.2	8.2	31.932	0.00079386	3.2595	20535000	4	8.2	4.1	3	1	6	2	1	2	1	2	1
453	E5RJZ9;O75525-2;O75525;E5RG12;H0YAQ1;H0YAQ3	E5RJZ9;O75525-2;O75525;E5RG12;H0YAQ1;H0YAQ3	KH domain-containing, RNA-binding, signal transduction-associated protein 3	KHDRBS3	tr|E5RJZ9|E5RJZ9_HUMAN KH domain-containing, RNA-binding, signal transduction-associated protein 3 (Fragment) OS=Homo sapiens GN=KHDRBS3 PE=1 SV=1;sp|O75525-2|KHDR3_HUMAN Isoform 2 of KH domain-containing, RNA-binding, signal transduction-associated protei	9088200	53172000	3891300	568010	3323300	30306000	47798000	3	2	2	9.4	7.2	7.2	29.48	0.0008071	3.4532	62260000	5	5.3	9.4	2	3	6	2	3	1	2	1	2
454	E7EMB6;E7ETB3;Q9ULA0;C9JBE1;C9J1E2;F8WAN0;C9JRG3;E7EPX3;B9ZVU2	E7EMB6;E7ETB3;Q9ULA0;C9JBE1	Aspartyl aminopeptidase	DNPEP	tr|E7EMB6|E7EMB6_HUMAN Aspartyl aminopeptidase OS=Homo sapiens GN=DNPEP PE=1 SV=2;tr|E7ETB3|E7ETB3_HUMAN Aspartyl aminopeptidase OS=Homo sapiens GN=DNPEP PE=1 SV=2;sp|Q9ULA0|DNPEP_HUMAN Aspartyl aminopeptidase OS=Homo sapiens GN=DNPEP PE=1 SV=1;tr|C9JBE1|C	158940000	30370000	9964000	8365500	1598400	124730000	55440000	8	8	8	32.9	32.9	32.9	44.992	0	33.343	189320000	9	32.9	18.5	7	2	9	7	3	7	3	7	3
455	E7EMC0;Q8WXS4	E7EMC0;Q8WXS4	Voltage-dependent calcium channel gamma-like subunit	TMEM37	tr|E7EMC0|E7EMC0_HUMAN Voltage-dependent calcium channel gamma-like subunit OS=Homo sapiens GN=TMEM37 PE=4 SV=1;sp|Q8WXS4|CCGL_HUMAN Voltage-dependent calcium channel gamma-like subunit OS=Homo sapiens GN=TMEM37 PE=2 SV=2	6452600	0	806570	806570	0	6452600	0	1	1	1	8.9	8.9	8.9	22.422	0.0010368	3.0111	6452600	1	8.9	0	1	0	2	1	0	1	0	1	0
456	E7EMC7;Q13501-2;Q13501;C9JRJ8;E9PFW8	E7EMC7;Q13501-2;Q13501;C9JRJ8;E9PFW8	Sequestosome-1	SQSTM1	tr|E7EMC7|E7EMC7_HUMAN Sequestosome-1 OS=Homo sapiens GN=SQSTM1 PE=1 SV=1;sp|Q13501-2|SQSTM_HUMAN Isoform 2 of Sequestosome-1 OS=Homo sapiens GN=SQSTM1;sp|Q13501|SQSTM_HUMAN Sequestosome-1 OS=Homo sapiens GN=SQSTM1 PE=1 SV=1;tr|C9JRJ8|C9JRJ8_HUMAN Sequesto	41377000	0	1880800	1880800	0	31897000	0	2	2	2	13	13	13	41.013	0	19.616	41377000	4	13	8.2	3	1	5	2	1	2	1	2	1
457	E7EMM4;Q13510;Q13510-2;Q13510-3	E7EMM4;Q13510;Q13510-2;Q13510-3	Acid ceramidase;Acid ceramidase subunit alpha;Acid ceramidase subunit beta	ASAH1	tr|E7EMM4|E7EMM4_HUMAN Acid ceramidase OS=Homo sapiens GN=ASAH1 PE=1 SV=1;sp|Q13510|ASAH1_HUMAN Acid ceramidase OS=Homo sapiens GN=ASAH1 PE=1 SV=5;sp|Q13510-2|ASAH1_HUMAN Isoform 2 of Acid ceramidase OS=Homo sapiens GN=ASAH1;sp|Q13510-3|ASAH1_HUMAN Isoform	362210000	328590000	28784000	15092000	13691000	469800000	332690000	8	8	8	28.1	28.1	28.1	41.796	0	52.922	690810000	24	26.2	23	11	13	4	7	6	7	6	7	6
458	G3V2V8;J3KMY5;H0YIZ1;G3V3E8;E7EMS2;G3V3D1;P61916-2;P61916	G3V2V8;J3KMY5;H0YIZ1;G3V3E8;E7EMS2;G3V3D1;P61916-2;P61916	Epididymal secretory protein E1	NPC2	tr|G3V2V8|G3V2V8_HUMAN Epididymal secretory protein E1 (Fragment) OS=Homo sapiens GN=NPC2 PE=1 SV=1;tr|J3KMY5|J3KMY5_HUMAN Epididymal secretory protein E1 OS=Homo sapiens GN=NPC2 PE=1 SV=1;tr|H0YIZ1|H0YIZ1_HUMAN Epididymal secretory protein E1 (Fragment) O	90006000	50373000	17547000	11251000	6296700	69665000	52102000	2	2	2	32	32	32	13.078	0	25.745	140380000	7	32	32	3	4	8	2	2	2	2	2	2
459	E7EMV0;E7ERW8;H9KV28;E9PHQ0;E9PEZ3;O60610-2;O60610-3;O60610;B4E2I7	E7EMV0;E7ERW8;H9KV28;E9PHQ0;E9PEZ3;O60610-2;O60610-3;O60610	Protein diaphanous homolog 1	DIAPH1	tr|E7EMV0|E7EMV0_HUMAN Protein diaphanous homolog 1 OS=Homo sapiens GN=DIAPH1 PE=1 SV=1;tr|E7ERW8|E7ERW8_HUMAN Protein diaphanous homolog 1 OS=Homo sapiens GN=DIAPH1 PE=1 SV=1;tr|H9KV28|H9KV28_HUMAN Protein diaphanous homolog 1 OS=Homo sapiens GN=DIAPH1 PE	32220000	43192000	1753800	749300	1004500	45868000	49244000	3	3	3	5	5	5	94.594	0	10.551	75412000	10	5	5	5	5	9	3	3	3	3	3	3
460	E7EMW7;O95071-2;O95071	E7EMW7;O95071-2;O95071	E3 ubiquitin-protein ligase UBR5	UBR5	tr|E7EMW7|E7EMW7_HUMAN E3 ubiquitin-protein ligase UBR5 OS=Homo sapiens GN=UBR5 PE=1 SV=1;sp|O95071-2|UBR5_HUMAN Isoform 2 of E3 ubiquitin-protein ligase UBR5 OS=Homo sapiens GN=UBR5;sp|O95071|UBR5_HUMAN E3 ubiquitin-protein ligase UBR5 OS=Homo sapiens GN=	4275200	0	28692	28692	0	2714300	0	1	1	1	0.6	0.6	0.6	308.57	0.0039139	2.3767	4275200	2	0.6	0	2	0	3	1	0	1	0	1	0
461	E7ENQ1;G3XAA2;H7C360;G5E948;E7EN19;E7ESS2;O95819-4;O95819-2;O95819;O95819-5;O95819-3;C9J840;E7EX83;H7C0P6;C9J338;Q8N4C8-5;Q8N4C8-2;Q8N4C8-3;Q8N4C8-4;Q8N4C8;E7ETN6;H7C3Z6;I3L2I2	E7ENQ1;G3XAA2;H7C360;G5E948;E7EN19;E7ESS2;O95819-4;O95819-2;O95819;O95819-5;O95819-3;C9J840;E7EX83;H7C0P6	Mitogen-activated protein kinase kinase kinase kinase 4	MAP4K4	tr|E7ENQ1|E7ENQ1_HUMAN Mitogen-activated protein kinase kinase kinase kinase 4 OS=Homo sapiens GN=MAP4K4 PE=1 SV=1;tr|G3XAA2|G3XAA2_HUMAN Mitogen-activated protein kinase kinase kinase kinase 4 OS=Homo sapiens GN=MAP4K4 PE=1 SV=2;tr|H7C360|H7C360_HUMAN Mit	87335000	240350000	5285200	1408600	3876600	196490000	171910000	7	7	5	9.9	9.9	8.3	132.16	0	21.782	327680000	16	8.9	7.5	8	8	23	6	5	6	5	5	3
462	E7EN32;O00255-3;O00255-2;O00255;E7ET29	E7EN32;O00255-3;O00255-2;O00255;E7ET29	Menin	MEN1	tr|E7EN32|E7EN32_HUMAN Menin OS=Homo sapiens GN=MEN1 PE=1 SV=1;sp|O00255-3|MEN1_HUMAN Isoform 3 of Menin OS=Homo sapiens GN=MEN1;sp|O00255-2|MEN1_HUMAN Isoform 2 of Menin OS=Homo sapiens GN=MEN1;sp|O00255|MEN1_HUMAN Menin OS=Homo sapiens GN=MEN1 PE=1 SV=4;	23038000	18329000	1253600	698130	555430	0	19916000	2	2	2	7.7	7.7	7.7	61.418	0	12.227	41368000	3	5.2	2.5	1	2	5	1	1	1	1	1	1
463	E7EN73;Q8IZA0-2;Q8IZA0;C9J519;Q8IZA0-3;B1AN15;F8WAW2;C9JQ56;C9JVB2;H0Y4S8;B4DYG9	E7EN73;Q8IZA0-2;Q8IZA0;C9J519;Q8IZA0-3	Dyslexia-associated protein KIAA0319-like protein	KIAA0319L	tr|E7EN73|E7EN73_HUMAN Dyslexia-associated protein KIAA0319-like protein (Fragment) OS=Homo sapiens GN=KIAA0319L PE=1 SV=1;sp|Q8IZA0-2|K319L_HUMAN Isoform 2 of Dyslexia-associated protein KIAA0319-like protein OS=Homo sapiens GN=KIAA0319L;sp|Q8IZA0|K319L_H	113560000	351800000	11634000	2838900	8795100	249200000	333550000	10	10	10	14.8	14.8	14.8	113.23	0	21.683	465360000	22	5.9	11.2	11	11	11	5	7	5	7	5	7
464	E7EN77;Q15021;F5H431;F5GZK7	E7EN77;Q15021	Condensin complex subunit 1	NCAPD2	tr|E7EN77|E7EN77_HUMAN Condensin complex subunit 1 (Fragment) OS=Homo sapiens GN=NCAPD2 PE=1 SV=2;sp|Q15021|CND1_HUMAN Condensin complex subunit 1 OS=Homo sapiens GN=NCAPD2 PE=1 SV=3	6999100	13410000	392480	134600	257880	0	17216000	3	3	3	5.1	5.1	5.1	102.65	0.00032123	6.9896	20409000	4	5.1	1.7	3	1	4	3	1	3	1	3	1
465	E7EV99;E7ENY0;P35611-2;P35611-6;P35611;P35611-3;P35611-4;P35611-5;H0Y9H2;D6RF25;D6RAH3;D6RJE2;H0YFD8;H0YG19;P35612-2;P35612-8;P35612-9;P35612-4;P35612-3;P35612	E7EV99;E7ENY0;P35611-2;P35611-6;P35611;P35611-3;P35611-4;P35611-5;H0Y9H2	Alpha-adducin	ADD1	tr|E7EV99|E7EV99_HUMAN Alpha-adducin OS=Homo sapiens GN=ADD1 PE=1 SV=1;tr|E7ENY0|E7ENY0_HUMAN Alpha-adducin OS=Homo sapiens GN=ADD1 PE=1 SV=1;sp|P35611-2|ADDA_HUMAN Isoform 2 of Alpha-adducin OS=Homo sapiens GN=ADD1;sp|P35611-6|ADDA_HUMAN Isoform 6 of Alph	1075800000	895040000	61589000	33619000	27970000	1038600000	782910000	18	18	18	51.3	51.3	51.3	70.055	0	197.84	1970800000	89	41.9	50	48	41	20	16	17	16	17	16	17
466	E7ENZ3;P48643;B7ZAR1;E9PCA1;P48643-2;D6RIZ7	E7ENZ3;P48643;B7ZAR1;E9PCA1;P48643-2	T-complex protein 1 subunit epsilon	CCT5	tr|E7ENZ3|E7ENZ3_HUMAN T-complex protein 1 subunit epsilon OS=Homo sapiens GN=CCT5 PE=1 SV=1;sp|P48643|TCPE_HUMAN T-complex protein 1 subunit epsilon OS=Homo sapiens GN=CCT5 PE=1 SV=1;tr|B7ZAR1|B7ZAR1_HUMAN T-complex protein 1 subunit epsilon OS=Homo sapie	1321200000	906000000	61867000	36700000	25167000	928280000	1081700000	17	17	17	55.8	55.8	55.8	53.848	0	186.05	2227200000	117	55.8	45.7	65	52	6	17	13	17	13	17	13
467	E7EP72;Q9UFG5;K7ER12;K7EQW1;A0A087WUU5;K7ELZ1;K7EK56;Q9UFG5-2	E7EP72;Q9UFG5;K7ER12;K7EQW1;A0A087WUU5;K7ELZ1;K7EK56;Q9UFG5-2	UPF0449 protein C19orf25	C19orf25	tr|E7EP72|E7EP72_HUMAN UPF0449 protein C19orf25 OS=Homo sapiens GN=C19orf25 PE=4 SV=1;sp|Q9UFG5|CS025_HUMAN UPF0449 protein C19orf25 OS=Homo sapiens GN=C19orf25 PE=1 SV=2;tr|K7ER12|K7ER12_HUMAN UPF0449 protein C19orf25 (Fragment) OS=Homo sapiens GN=C19orf2	19509000	44090000	4892200	1500700	3391500	0	58345000	2	2	2	18.4	18.4	18.4	17.055	0.00078329	3.1422	63599000	0	5.7	12.7	0	0	8	1	1	1	1	1	1
468	E7EPB3;P50914	E7EPB3;P50914	60S ribosomal protein L14	RPL14	tr|E7EPB3|E7EPB3_HUMAN 60S ribosomal protein L14 OS=Homo sapiens GN=RPL14 PE=1 SV=1;sp|P50914|RL14_HUMAN 60S ribosomal protein L14 OS=Homo sapiens GN=RPL14 PE=1 SV=4	4594900000	3914700000	850950000	459490000	391470000	3803900000	4401700000	10	10	10	58.9	58.9	58.9	14.558	0	123.73	8509500000	143	58.9	58.1	72	71	2	10	9	10	9	10	9
469	H0Y3Y4;E7ES33;E7EPK1;Q16181-2;Q16181;G3V1Q4;Q6ZU15	H0Y3Y4;E7ES33;E7EPK1;Q16181-2;Q16181;G3V1Q4	Septin-7	2007-09-01	tr|H0Y3Y4|H0Y3Y4_HUMAN Septin-7 (Fragment) OS=Homo sapiens GN=SEPT7 PE=1 SV=1;tr|E7ES33|E7ES33_HUMAN Septin-7 OS=Homo sapiens GN=SEPT7 PE=1 SV=3;tr|E7EPK1|E7EPK1_HUMAN Septin-7 OS=Homo sapiens GN=SEPT7 PE=1 SV=2;sp|Q16181-2|SEPT7_HUMAN Isoform 2 of Septin-	171160000	120610000	14589000	8558100	6030600	161690000	109390000	4	4	4	19.6	19.6	19.6	43.036	0	32.471	291780000	18	19.6	13.1	7	11	7	4	3	4	3	4	3
470	E7EPN9;Q9Y520-2;Q9Y520-3;Q9Y520-6;Q9Y520-4;Q9Y520-5;Q9Y520;Q9Y520-7	E7EPN9;Q9Y520-2;Q9Y520-3;Q9Y520-6;Q9Y520-4;Q9Y520-5;Q9Y520;Q9Y520-7	Protein PRRC2C	PRRC2C	tr|E7EPN9|E7EPN9_HUMAN Protein PRRC2C OS=Homo sapiens GN=PRRC2C PE=1 SV=1;sp|Q9Y520-2|PRC2C_HUMAN Isoform 2 of Protein PRRC2C OS=Homo sapiens GN=PRRC2C;sp|Q9Y520-3|PRC2C_HUMAN Isoform 3 of Protein PRRC2C OS=Homo sapiens GN=PRRC2C;sp|Q9Y520-6|PRC2C_HUMAN Is	27006000	0	210980	210980	0	12227000	0	1	1	1	0.5	0.5	0.5	308.77	0.0010254	2.9091	27006000	2	0.5	0	2	0	8	1	0	1	0	1	0
471	E7EPT4;P19404	E7EPT4;P19404	NADH dehydrogenase [ubiquinone] flavoprotein 2, mitochondrial	NDUFV2	tr|E7EPT4|E7EPT4_HUMAN NADH dehydrogenase [ubiquinone] flavoprotein 2, mitochondrial OS=Homo sapiens GN=NDUFV2 PE=1 SV=1;sp|P19404|NDUV2_HUMAN NADH dehydrogenase [ubiquinone] flavoprotein 2, mitochondrial OS=Homo sapiens GN=NDUFV2 PE=1 SV=2	2273400000	1543100000	254430000	151560000	102870000	2059200000	1722600000	9	9	9	47.2	47.2	47.2	27.907	0	185.47	3816500000	71	47.2	47.2	30	41	2	9	9	9	9	9	9
472	I3L4Z6;E7EQ34;O14653;O14653-2;I3L1K7;O14653-3;I3L3V4;I3L0K1;I3NI02	I3L4Z6;E7EQ34;O14653;O14653-2;I3L1K7;O14653-3;I3L3V4;I3L0K1	Golgi SNAP receptor complex member 2	GOSR2	tr|I3L4Z6|I3L4Z6_HUMAN Golgi SNAP receptor complex member 2 OS=Homo sapiens GN=GOSR2 PE=4 SV=1;tr|E7EQ34|E7EQ34_HUMAN Golgi SNAP receptor complex member 2 OS=Homo sapiens GN=GOSR2 PE=3 SV=2;sp|O14653|GOSR2_HUMAN Golgi SNAP receptor complex member 2 OS=Homo	515200000	252820000	76802000	51520000	25282000	379670000	204680000	5	5	5	41.2	41.2	41.2	19.496	0	100.64	768020000	29	41.2	31.5	17	12	9	5	4	5	4	5	4
473	E7EQ69;Q9GZZ1	E7EQ69;Q9GZZ1	N-alpha-acetyltransferase 50	NAA50	tr|E7EQ69|E7EQ69_HUMAN N-alpha-acetyltransferase 50 OS=Homo sapiens GN=NAA50 PE=1 SV=1;sp|Q9GZZ1|NAA50_HUMAN N-alpha-acetyltransferase 50 OS=Homo sapiens GN=NAA50 PE=1 SV=1	0	17844000	1487000	0	1487000	0	22903000	1	1	1	8.9	8.9	8.9	19.311	0.00078227	3.1176	17844000	2	0	8.9	0	2	2	0	1	0	1	0	1
474	E7EQG2;Q14240;Q14240-2	E7EQG2;Q14240;Q14240-2	Eukaryotic initiation factor 4A-II;Eukaryotic initiation factor 4A-II, N-terminally processed	EIF4A2	tr|E7EQG2|E7EQG2_HUMAN Eukaryotic initiation factor 4A-II OS=Homo sapiens GN=EIF4A2 PE=1 SV=1;sp|Q14240|IF4A2_HUMAN Eukaryotic initiation factor 4A-II OS=Homo sapiens GN=EIF4A2 PE=1 SV=2;sp|Q14240-2|IF4A2_HUMAN Isoform 2 of Eukaryotic initiation factor 4A-	58546000	82952000	6431700	2661200	3770500	69521000	77663000	12	2	2	33.1	6.9	6.9	41.29	0.00029568	4.9821	141500000	4	30.4	30.7	1	3	3	10	10	1	2	1	2
475	E7EQR4;P15311	E7EQR4;P15311	Ezrin	EZR	tr|E7EQR4|E7EQR4_HUMAN Ezrin OS=Homo sapiens GN=EZR PE=1 SV=3;sp|P15311|EZRI_HUMAN Ezrin OS=Homo sapiens GN=EZR PE=1 SV=4	107500000	81596000	4976300	2829000	2147300	72267000	79963000	10	5	5	19.3	12.6	12.6	69.371	0	20.95	189100000	14	15.7	17.1	9	5	2	7	9	4	4	4	4
476	E7EQR8;Q9GZM5;D6RGY8;D6RFI3;H0Y9A1	E7EQR8;Q9GZM5;D6RGY8;D6RFI3	Protein YIPF3;Protein YIPF3, 36 kDa form III	YIPF3	tr|E7EQR8|E7EQR8_HUMAN Protein YIPF3 OS=Homo sapiens GN=YIPF3 PE=1 SV=1;sp|Q9GZM5|YIPF3_HUMAN Protein YIPF3 OS=Homo sapiens GN=YIPF3 PE=1 SV=1;tr|D6RGY8|D6RGY8_HUMAN Protein YIPF3 (Fragment) OS=Homo sapiens GN=YIPF3 PE=1 SV=1;tr|D6RFI3|D6RFI3_HUMAN Protein	209940000	147930000	22367000	13121000	9245500	132280000	235880000	3	3	3	11	11	11	38.889	0	9.231	357870000	12	11	7.9	7	5	5	3	2	3	2	3	2
477	E9PES6;E7ES08;E7EQU1;O15347	E9PES6;E7ES08;E7EQU1;O15347	High mobility group protein B3	HMGB3	tr|E9PES6|E9PES6_HUMAN High mobility group protein B3 (Fragment) OS=Homo sapiens GN=HMGB3 PE=1 SV=1;tr|E7ES08|E7ES08_HUMAN High mobility group protein B3 (Fragment) OS=Homo sapiens GN=HMGB3 PE=1 SV=1;tr|E7EQU1|E7EQU1_HUMAN High mobility group protein B3 (F	315500000	317000000	70278000	35056000	35222000	418500000	201490000	7	7	7	35.3	35.3	35.3	17.522	0	49.282	632500000	17	26.8	26.8	9	8	4	5	5	5	5	5	5
478	E7EQZ4;Q16637-4;Q16637-2;Q16637-3;Q16637	E7EQZ4;Q16637-4;Q16637-2;Q16637-3;Q16637	Survival motor neuron protein	SMN1	tr|E7EQZ4|E7EQZ4_HUMAN Survival motor neuron protein OS=Homo sapiens GN=SMN1 PE=1 SV=1;sp|Q16637-4|SMN_HUMAN Isoform SMN-delta57 of Survival motor neuron protein OS=Homo sapiens GN=SMN1;sp|Q16637-2|SMN_HUMAN Isoform SMN-delta5 of Survival motor neuron prot	12360000	0	1544900	1544900	0	7847000	0	2	2	2	11.9	11.9	11.9	31.689	0.00057405	4.3916	12360000	1	11.9	0	1	0	5	2	0	2	0	2	0
479	E7ERS3;Q86VM9;Q86VM9-2;H3BRN6;H3BRH3	E7ERS3;Q86VM9;Q86VM9-2	Zinc finger CCCH domain-containing protein 18	ZC3H18	tr|E7ERS3|E7ERS3_HUMAN Zinc finger CCCH domain-containing protein 18 OS=Homo sapiens GN=ZC3H18 PE=1 SV=1;sp|Q86VM9|ZCH18_HUMAN Zinc finger CCCH domain-containing protein 18 OS=Homo sapiens GN=ZC3H18 PE=1 SV=2;sp|Q86VM9-2|ZCH18_HUMAN Isoform 2 of Zinc finge	81469000	118870000	3928100	1597400	2330700	80151000	134280000	6	6	6	10.1	10.1	10.1	108.94	0	21.603	200340000	16	7.3	7	6	10	5	4	4	4	4	4	4
480	E7ERX9;Q9NQT8;F2Z2F9	E7ERX9;Q9NQT8;F2Z2F9	Kinesin-like protein;Kinesin-like protein KIF13B	KIF13B	tr|E7ERX9|E7ERX9_HUMAN Kinesin-like protein KIF13B OS=Homo sapiens GN=KIF13B PE=1 SV=1;sp|Q9NQT8|KI13B_HUMAN Kinesin-like protein KIF13B OS=Homo sapiens GN=KIF13B PE=1 SV=2;tr|F2Z2F9|F2Z2F9_HUMAN Kinesin-like protein KIF13B OS=Homo sapiens GN=KIF13B PE=1 S	6673800	14606000	494880	155200	339680	0	16810000	2	2	2	4.2	4.2	4.2	83.877	0.00078968	3.2102	21280000	2	2.6	1.6	1	1	3	1	1	1	1	1	1
481	H7C4V4;E7ESA7;P29474	H7C4V4;E7ESA7;P29474	Nitric oxide synthase, endothelial	NOS3	tr|H7C4V4|H7C4V4_HUMAN Nitric oxide synthase, endothelial (Fragment) OS=Homo sapiens GN=NOS3 PE=4 SV=1;tr|E7ESA7|E7ESA7_HUMAN Nitric oxide synthase, endothelial OS=Homo sapiens GN=NOS3 PE=4 SV=1;sp|P29474|NOS3_HUMAN Nitric oxide synthase, endothelial OS=Ho	0	101590000	5644000	0	5644000	0	97462000	1	1	1	2	2	2	33.836	0.0007926	3.2488	101590000	1	0	2	0	1	3	0	1	0	1	0	1
482	E7ESL0;J3KQY1;Q9NWU5;Q9NWU5-2;Q9NWU5-3	E7ESL0;J3KQY1;Q9NWU5;Q9NWU5-2;Q9NWU5-3	39S ribosomal protein L22, mitochondrial	MRPL22	tr|E7ESL0|E7ESL0_HUMAN 39S ribosomal protein L22, mitochondrial OS=Homo sapiens GN=MRPL22 PE=1 SV=1;tr|J3KQY1|J3KQY1_HUMAN 39S ribosomal protein L22, mitochondrial OS=Homo sapiens GN=MRPL22 PE=1 SV=1;sp|Q9NWU5|RM22_HUMAN 39S ribosomal protein L22, mitochon	673180000	664680000	89190000	44878000	44312000	637940000	745460000	9	9	9	42	42	42	24.325	0	49.788	1337900000	38	37.7	42	22	16	5	7	9	7	9	7	9
483	E7ESP4;E7EMF1;E9PB77;D6RG08	E7ESP4;E7EMF1;E9PB77		ITGA2	tr|E7ESP4|E7ESP4_HUMAN Integrin alpha-2 OS=Homo sapiens GN=ITGA2 PE=1 SV=1;tr|E7EMF1|E7EMF1_HUMAN Integrin alpha-2 OS=Homo sapiens GN=ITGA2 PE=1 SV=1;tr|E9PB77|E9PB77_HUMAN Integrin alpha-2 OS=Homo sapiens GN=ITGA2 PE=1 SV=1	262570000	26985000	7238900	6564300	674610	110550000	82042000	22	1	1	35.2	2.1	2.1	102.83	0	127.38	289560000	6	34.3	31	5	1	4	21	19	1	1	1	1
484	K7EKW3;E7ESS3;Q71RG4-2;Q71RG4;Q71RG4-3	K7EKW3;E7ESS3;Q71RG4-2;Q71RG4;Q71RG4-3	Transmembrane and ubiquitin-like domain-containing protein 2	TMUB2	tr|K7EKW3|K7EKW3_HUMAN Transmembrane and ubiquitin-like domain-containing protein 2 (Fragment) OS=Homo sapiens GN=TMUB2 PE=4 SV=1;tr|E7ESS3|E7ESS3_HUMAN Transmembrane and ubiquitin-like domain-containing protein 2 OS=Homo sapiens GN=TMUB2 PE=4 SV=1;sp|Q71R	23320000	0	2591200	2591200	0	19288000	0	2	2	2	16	16	16	20.798	0.0041373	2.3325	23320000	1	16	0	1	0	5	2	0	2	0	2	0
485	E7ESY4;Q13330-3;Q13330;H0Y4T7;Q13330-2;F8W9Y9;H0YIT0;E9PF88;F8VSM3;E9PCS8	E7ESY4;Q13330-3;Q13330;H0Y4T7;Q13330-2	Metastasis-associated protein MTA1	MTA1	tr|E7ESY4|E7ESY4_HUMAN Metastasis-associated protein MTA1 OS=Homo sapiens GN=MTA1 PE=1 SV=1;sp|Q13330-3|MTA1_HUMAN Isoform 3 of Metastasis-associated protein MTA1 OS=Homo sapiens GN=MTA1;sp|Q13330|MTA1_HUMAN Metastasis-associated protein MTA1 OS=Homo sapie	89408000	73199000	3188400	1753100	1435300	92900000	111440000	5	5	4	11.1	11.1	8.5	79.372	0	20.075	162610000	11	8.1	7.3	5	6	10	4	3	4	3	3	2
486	E7ET49;Q8NCG7-2;Q8NCG7-4;Q8NCG7	E7ET49;Q8NCG7-2;Q8NCG7-4;Q8NCG7	Sn1-specific diacylglycerol lipase beta	DAGLB	tr|E7ET49|E7ET49_HUMAN Sn1-specific diacylglycerol lipase beta OS=Homo sapiens GN=DAGLB PE=1 SV=1;sp|Q8NCG7-2|DGLB_HUMAN Isoform 2 of Sn1-specific diacylglycerol lipase beta OS=Homo sapiens GN=DAGLB;sp|Q8NCG7-4|DGLB_HUMAN Isoform 4 of Sn1-specific diacylgl	22729000	0	783740	783740	0	21501000	0	3	3	3	6.2	6.2	6.2	68.951	0.0002963	5.0227	22729000	5	6.2	2.9	4	1	4	3	1	3	1	3	1
487	F5H562;E7ET55;F5H748;P35670-2;P35670-3;P35670-4;P35670;Q04656-4;Q04656-5;Q04656;Q04656-2;Q04656-3	F5H562;E7ET55;F5H748;P35670-2;P35670-3;P35670-4;P35670	Copper-transporting ATPase 2;WND/140 kDa	ATP7B	tr|F5H562|F5H562_HUMAN WND/140 kDa OS=Homo sapiens GN=ATP7B PE=3 SV=1;tr|E7ET55|E7ET55_HUMAN WND/140 kDa OS=Homo sapiens GN=ATP7B PE=3 SV=2;tr|F5H748|F5H748_HUMAN WND/140 kDa OS=Homo sapiens GN=ATP7B PE=3 SV=1;sp|P35670-2|ATP7B_HUMAN Isoform 2 of Copper-tr	42146000	8480600	973600	810510	163090	18314000	13622000	4	4	4	5.4	5.4	5.4	110.32	0	10.689	50627000	5	3.4	3.3	2	3	12	2	3	2	3	2	3
488	E7ETA6;Q15154-2;Q15154;A6NNN6;H0YBA1;E7EV93;E9PGW9;Q15154-3;E5RGQ4	E7ETA6;Q15154-2;Q15154;A6NNN6	Pericentriolar material 1 protein	PCM1	tr|E7ETA6|E7ETA6_HUMAN Pericentriolar material 1 protein OS=Homo sapiens GN=PCM1 PE=1 SV=1;sp|Q15154-2|PCM1_HUMAN Isoform 2 of Pericentriolar material 1 protein OS=Homo sapiens GN=PCM1;sp|Q15154|PCM1_HUMAN Pericentriolar material 1 protein OS=Homo sapiens	628480000	481260000	11097000	6284800	4812600	671900000	544840000	22	22	22	15.6	15.6	15.6	227.73	0	113.51	1109700000	72	13.6	11.2	36	36	9	18	16	18	16	18	16
489	G3XAM2;E7ETH0;P05156;A0A087X0I2;D6R9Z8	G3XAM2;E7ETH0;P05156	Complement factor I;Complement factor I heavy chain;Complement factor I light chain	CFI	tr|G3XAM2|G3XAM2_HUMAN Complement factor I light chain OS=Homo sapiens GN=CFI PE=3 SV=1;tr|E7ETH0|E7ETH0_HUMAN Complement factor I light chain OS=Homo sapiens GN=CFI PE=3 SV=1;sp|P05156|CFAI_HUMAN Complement factor I OS=Homo sapiens GN=CFI PE=1 SV=2	54150000	74864000	3486900	1463500	2023300	56145000	92925000	5	5	5	11.3	11.3	11.3	65.059	0	9.7666	129010000	12	11.3	8.5	7	5	5	5	4	5	4	5	4
490	E7ETM6;Q8N2H4;F2Z2A3;H3BUS1;Q5QPU8;Q8N2H4-2	E7ETM6;Q8N2H4;F2Z2A3;H3BUS1;Q5QPU8;Q8N2H4-2	Protein SYS1 homolog	SYS1;SYS1-DBNDD2	tr|E7ETM6|E7ETM6_HUMAN Protein SYS1 homolog OS=Homo sapiens GN=SYS1 PE=4 SV=1;sp|Q8N2H4|SYS1_HUMAN Protein SYS1 homolog OS=Homo sapiens GN=SYS1 PE=1 SV=1;tr|F2Z2A3|F2Z2A3_HUMAN Protein SYS1-DBNDD2 OS=Homo sapiens GN=SYS1-DBNDD2 PE=4 SV=1;tr|H3BUS1|H3BUS1_H	26547000	91438000	19664000	4424400	15240000	61388000	68319000	2	2	2	23	23	23	15.183	0.00032362	7.1989	117980000	7	16.3	23	3	4	6	1	2	1	2	1	2
491	E7ETU5;F6Y5H0;P29558-2;P29558	E7ETU5;F6Y5H0;P29558-2;P29558	RNA-binding motif, single-stranded-interacting protein 1	RBMS1	tr|E7ETU5|E7ETU5_HUMAN RNA-binding motif, single-stranded-interacting protein 1 OS=Homo sapiens GN=RBMS1 PE=1 SV=1;tr|F6Y5H0|F6Y5H0_HUMAN RNA-binding motif, single-stranded-interacting protein 1 OS=Homo sapiens GN=RBMS1 PE=1 SV=1;sp|P29558-2|RBMS1_HUMAN Is	23123000	30675000	3362400	1445200	1917200	20658000	33330000	1	1	1	4.1	4.1	4.1	40.147	0.0078273	2.0298	53798000	2	4.1	4.1	1	1	4	1	1	1	1	1	1
492	H0Y9G6;E7ETU7;P09001;D6RC14;E9PF06;D6RBQ5	H0Y9G6;E7ETU7;P09001;D6RC14;E9PF06	39S ribosomal protein L3, mitochondrial	MRPL3	tr|H0Y9G6|H0Y9G6_HUMAN 39S ribosomal protein L3, mitochondrial (Fragment) OS=Homo sapiens GN=MRPL3 PE=1 SV=1;tr|E7ETU7|E7ETU7_HUMAN 39S ribosomal protein L3, mitochondrial OS=Homo sapiens GN=MRPL3 PE=1 SV=1;sp|P09001|RM03_HUMAN 39S ribosomal protein L3, mi	375120000	543340000	38269000	15630000	22639000	614000000	501630000	11	11	11	35.8	35.8	35.8	40.47	0	39.549	918460000	29	25.1	22.6	12	17	6	8	7	8	7	8	7
493	E7ETU9;O00469-2;O00469;O00469-3;C9JXZ0	E7ETU9;O00469-2;O00469;O00469-3	Procollagen-lysine,2-oxoglutarate 5-dioxygenase 2	PLOD2	tr|E7ETU9|E7ETU9_HUMAN Procollagen-lysine,2-oxoglutarate 5-dioxygenase 2 OS=Homo sapiens GN=PLOD2 PE=1 SV=1;sp|O00469-2|PLOD2_HUMAN Isoform 2 of Procollagen-lysine,2-oxoglutarate 5-dioxygenase 2 OS=Homo sapiens GN=PLOD2;sp|O00469|PLOD2_HUMAN Procollagen-ly	1021800000	668830000	42265000	25544000	16721000	752060000	953380000	20	20	20	34.6	34.6	34.6	81.169	0	100.32	1690600000	68	33.4	24.2	38	30	5	18	14	18	14	18	14
494	J3KQ96;E7ETY2;Q13428-2;Q13428-8;Q13428-6;Q13428-7;Q13428;Q13428-3;Q13428-4;Q13428-5	J3KQ96;E7ETY2;Q13428-2;Q13428-8;Q13428-6;Q13428-7;Q13428;Q13428-3;Q13428-4	Treacle protein	TCOF1	tr|J3KQ96|J3KQ96_HUMAN Treacle protein (Fragment) OS=Homo sapiens GN=TCOF1 PE=1 SV=1;tr|E7ETY2|E7ETY2_HUMAN Treacle protein OS=Homo sapiens GN=TCOF1 PE=1 SV=1;sp|Q13428-2|TCOF_HUMAN Isoform 2 of Treacle protein OS=Homo sapiens GN=TCOF1;sp|Q13428-8|TCOF_HUM	103270000	67588000	2162700	1307200	855550	79917000	79046000	5	5	5	5.2	5.2	5.2	144.12	0	41.186	170860000	15	3.7	3.5	9	6	10	4	3	4	3	4	3
495	E7ETY4;E9PC69;Q7KZI7-10;Q7KZI7-13;Q7KZI7-7;Q7KZI7-2;Q7KZI7-15;Q7KZI7-5;Q7KZI7-16;Q7KZI7-4;Q7KZI7-9;Q7KZI7-12;Q7KZI7-14;Q7KZI7-3;Q7KZI7-6;Q7KZI7-11;Q7KZI7-8;Q7KZI7	E7ETY4;E9PC69;Q7KZI7-10;Q7KZI7-13;Q7KZI7-7;Q7KZI7-2;Q7KZI7-15;Q7KZI7-5;Q7KZI7-16;Q7KZI7-4;Q7KZI7-9;Q7KZI7-12;Q7KZI7-14;Q7KZI7-3;Q7KZI7-6;Q7KZI7-11;Q7KZI7-8;Q7KZI7	Serine/threonine-protein kinase MARK2	MARK2	tr|E7ETY4|E7ETY4_HUMAN Serine/threonine-protein kinase MARK2 OS=Homo sapiens GN=MARK2 PE=1 SV=1;tr|E9PC69|E9PC69_HUMAN Serine/threonine-protein kinase MARK2 OS=Homo sapiens GN=MARK2 PE=1 SV=3;sp|Q7KZI7-10|MARK2_HUMAN Isoform 10 of Serine/threonine-protein	15271000	0	363590	363590	0	13643000	0	2	2	2	5.3	5.3	5.3	78.452	0.00055695	3.9398	15271000	2	5.3	2.9	1	1	18	2	1	2	1	2	1
496	E7ETZ4;Q9Y6E2;E9PFD4;B5MCE7;Q75MG1;B5MCH7;E9PFE3;C9JF98;F8WDX8;E7EMS9;Q9Y6E2-2	E7ETZ4;Q9Y6E2;E9PFD4;B5MCE7;Q75MG1;B5MCH7	Basic leucine zipper and W2 domain-containing protein 2	BZW2	tr|E7ETZ4|E7ETZ4_HUMAN Basic leucine zipper and W2 domain-containing protein 2 (Fragment) OS=Homo sapiens GN=BZW2 PE=1 SV=1;sp|Q9Y6E2|BZW2_HUMAN Basic leucine zipper and W2 domain-containing protein 2 OS=Homo sapiens GN=BZW2 PE=1 SV=1;tr|E9PFD4|E9PFD4_HUMA	12173000	0	392690	392690	0	12173000	0	3	2	2	8.6	6.9	6.9	46.913	0.0074092	2.0988	12173000	2	8.6	4.7	1	1	11	3	1	2	1	2	1
497	E9PLT1;E7EU05;P16671;P16671-4;P16671-3;P16671-2;E7EX47	E9PLT1;E7EU05;P16671;P16671-4;P16671-3	Platelet glycoprotein 4	CD36	tr|E9PLT1|E9PLT1_HUMAN Platelet glycoprotein 4 OS=Homo sapiens GN=CD36 PE=4 SV=1;tr|E7EU05|E7EU05_HUMAN Platelet glycoprotein 4 (Fragment) OS=Homo sapiens GN=CD36 PE=4 SV=2;sp|P16671|CD36_HUMAN Platelet glycoprotein 4 OS=Homo sapiens GN=CD36 PE=1 SV=2;sp|P	111070000	94952000	11445000	6170300	5275100	120650000	112730000	5	5	5	17.2	17.2	17.2	44.732	0	27.379	206020000	19	15.4	13.9	9	10	7	4	4	4	4	4	4
498	F5GWN4;F8WBT0;E7EU13;Q96P48-5;Q96P48-7;Q96P48-2;Q96P48-4;Q96P48-1;Q96P48-3;Q96P48	F5GWN4;F8WBT0;E7EU13;Q96P48-5;Q96P48-7;Q96P48-2;Q96P48-4;Q96P48-1;Q96P48-3;Q96P48	Arf-GAP with Rho-GAP domain, ANK repeat and PH domain-containing protein 1	ARAP1	tr|F5GWN4|F5GWN4_HUMAN Arf-GAP with Rho-GAP domain, ANK repeat and PH domain-containing protein 1 (Fragment) OS=Homo sapiens GN=ARAP1 PE=1 SV=1;tr|F8WBT0|F8WBT0_HUMAN Arf-GAP with Rho-GAP domain, ANK repeat and PH domain-containing protein 1 (Fragment) OS=	19340000	7253700	1772900	1289300	483580	12625000	12337000	2	2	2	11	11	11	28.83	0.0012716	2.8225	26594000	3	11	5.1	3	0	10	2	1	2	1	2	1
499	E7EU96;Q5U5J2;Q8NEV1;P68400;P68400-2;V9GYW6;V9GYA2;V9GY80;A0A087WY74	E7EU96;Q5U5J2;Q8NEV1;P68400	Casein kinase II subunit alpha 3;Casein kinase II subunit alpha	CSNK2A1;CSNK2A3	tr|E7EU96|E7EU96_HUMAN Casein kinase II subunit alpha OS=Homo sapiens GN=CSNK2A1 PE=1 SV=1;tr|Q5U5J2|Q5U5J2_HUMAN CSNK2A1 protein OS=Homo sapiens GN=CSNK2A1 PE=1 SV=1;sp|Q8NEV1|CSK23_HUMAN Casein kinase II subunit alpha 3 OS=Homo sapiens GN=CSNK2A3 PE=1 SV	505940000	646240000	52372000	22997000	29375000	550560000	713600000	9	9	8	29.6	29.6	28.1	45.31	0	96.321	1152200000	44	26.5	29.6	16	28	9	8	9	8	9	7	8
500	E7EUN9;Q9NX74;J3QLD5	E7EUN9;Q9NX74;J3QLD5	tRNA-dihydrouridine(20) synthase [NAD(P)+]-like	DUS2	tr|E7EUN9|E7EUN9_HUMAN tRNA-dihydrouridine(20) synthase [NAD(P)+]-like OS=Homo sapiens GN=DUS2 PE=1 SV=1;sp|Q9NX74|DUS2L_HUMAN tRNA-dihydrouridine(20) synthase [NAD(P)+]-like OS=Homo sapiens GN=DUS2 PE=1 SV=1;tr|J3QLD5|J3QLD5_HUMAN tRNA-dihydrouridine(20)	31295000	0	1009500	1009500	0	22212000	0	2	2	2	6.1	6.1	6.1	51.388	0.0060212	2.2017	31295000	1	6.1	0	1	0	3	2	0	2	0	2	0
501	E7EX73;E9PGM1;E7EUU4;Q04637-5;Q04637-4;Q04637-3;Q04637;Q04637-8;Q04637-9;Q04637-6;Q04637-7;C9J6B6;C9JF13;H7C044;C9K073;C9J2Z7;F8WCF2;REV__Q8NEG2-2;REV__F5H7J8;C9JHW9;H7C0V6;REV__Q8NEG2;REV__C9JQZ6;REV__J3KQX6	E7EX73;E9PGM1;E7EUU4;Q04637-5;Q04637-4;Q04637-3;Q04637;Q04637-8;Q04637-9;Q04637-6;Q04637-7	Eukaryotic translation initiation factor 4 gamma 1	EIF4G1	tr|E7EX73|E7EX73_HUMAN Eukaryotic translation initiation factor 4 gamma 1 OS=Homo sapiens GN=EIF4G1 PE=1 SV=1;tr|E9PGM1|E9PGM1_HUMAN Eukaryotic translation initiation factor 4 gamma 1 OS=Homo sapiens GN=EIF4G1 PE=1 SV=1;tr|E7EUU4|E7EUU4_HUMAN Eukaryotic tr	496260000	336190000	10811000	6444900	4366100	398990000	496140000	18	18	17	17.9	17.9	17.4	158.64	0	100.07	832440000	47	14.6	10.1	24	23	24	14	11	14	11	13	10
502	E7EVA0;P27816-6;P27816;P27816-2;H7C4C5;P27816-5;P27816-4;H0Y2V1;B5MEG9;F8W9U4	E7EVA0;P27816-6;P27816;P27816-2	Microtubule-associated protein;Microtubule-associated protein 4	MAP4	tr|E7EVA0|E7EVA0_HUMAN Microtubule-associated protein OS=Homo sapiens GN=MAP4 PE=1 SV=1;sp|P27816-6|MAP4_HUMAN Isoform 6 of Microtubule-associated protein 4 OS=Homo sapiens GN=MAP4;sp|P27816|MAP4_HUMAN Microtubule-associated protein 4 OS=Homo sapiens GN=MA	1002700000	1656200000	18857000	7111100	11746000	1144500000	1160900000	12	12	12	9.1	9.1	9.1	245.44	0	44.644	2658800000	27	7.1	5.3	17	10	10	10	7	10	7	10	7
503	E9PEY4;E7EVB6;O60941-6;O60941-7;O60941;O60941-5;O60941-3;O60941-2;O60941-4;M0QZ28;Q9Y4J8-6;Q9Y4J8-10;Q9Y4J8-11;Q9Y4J8-13;Q9Y4J8-2;Q9Y4J8-14;Q9Y4J8-15;Q9Y4J8;E9PE76;E7ES64;M0R021;M0R0C4;F8W9U0;Q9Y4J8-8;Q9Y4J8-12;Q9Y4J8-16;Q9Y4J8-5;Q9Y4J8-4;Q9Y4J8-3	E9PEY4;E7EVB6;O60941-6;O60941-7;O60941;O60941-5;O60941-3;O60941-2;O60941-4	Dystrobrevin;Dystrobrevin beta	DTNB	tr|E9PEY4|E9PEY4_HUMAN Dystrobrevin OS=Homo sapiens GN=DTNB PE=1 SV=1;tr|E7EVB6|E7EVB6_HUMAN Dystrobrevin OS=Homo sapiens GN=DTNB PE=1 SV=3;sp|O60941-6|DTNB_HUMAN Isoform 6 of Dystrobrevin beta OS=Homo sapiens GN=DTNB;sp|O60941-7|DTNB_HUMAN Isoform 7 of Dy	90282000	40433000	3351700	2314900	1036800	81572000	24274000	6	6	6	19.8	19.8	19.8	67.054	0	16.634	130720000	9	14.4	8.6	5	4	29	5	2	5	2	5	2
504	E7EVG2;Q86U86-5;Q86U86-4;Q86U86-7;Q86U86-3;Q86U86-9;Q86U86-2;Q86U86-8;Q86U86;Q86U86-6;H0Y5B5;C9JPI5;C9JCJ2;C9J053;C9JQF1	E7EVG2;Q86U86-5;Q86U86-4;Q86U86-7;Q86U86-3;Q86U86-9;Q86U86-2;Q86U86-8;Q86U86;Q86U86-6;H0Y5B5;C9JPI5	Protein polybromo-1	PBRM1	tr|E7EVG2|E7EVG2_HUMAN Protein polybromo-1 (Fragment) OS=Homo sapiens GN=PBRM1 PE=1 SV=3;sp|Q86U86-5|PB1_HUMAN Isoform 5 of Protein polybromo-1 OS=Homo sapiens GN=PBRM1;sp|Q86U86-4|PB1_HUMAN Isoform 4 of Protein polybromo-1 OS=Homo sapiens GN=PBRM1;sp|Q86U	103430000	32368000	1476100	1124200	351830	81287000	59458000	8	8	8	6.4	6.4	6.4	168.5	0	16.32	135800000	15	6.4	2.5	10	5	15	8	3	8	3	8	3
505	G3V2E7;F8W6L3;G3V3H3;G3V5R9;E7EVH7;Q07866-8;Q07866-2;Q07866-3;Q07866;Q07866-7;Q07866-5;Q07866-10;Q07866-6;Q07866-4;Q07866-9;G5E9S8;A8MZ87;Q9H0B6-2;Q9H0B6;H0YGB8;H0YJU9;H0YJL0;G3V2P7;H0YJT3;E9PQ02;H0YG16;A8MX29	G3V2E7;F8W6L3;G3V3H3;G3V5R9;E7EVH7;Q07866-8;Q07866-2;Q07866-3;Q07866;Q07866-7;Q07866-5;Q07866-10;Q07866-6;Q07866-4;Q07866-9;G5E9S8	Kinesin light chain 1	KLC1	tr|G3V2E7|G3V2E7_HUMAN Kinesin light chain 1 OS=Homo sapiens GN=KLC1 PE=4 SV=1;tr|F8W6L3|F8W6L3_HUMAN Kinesin light chain 1 OS=Homo sapiens GN=KLC1 PE=4 SV=1;tr|G3V3H3|G3V3H3_HUMAN Kinesin light chain 1 OS=Homo sapiens GN=KLC1 PE=4 SV=1;tr|G3V5R9|G3V5R9_HU	28546000	75803000	2898600	792940	2105600	25367000	0	5	5	5	14.5	14.5	14.5	62.715	0	11.185	104350000	3	12.2	2.4	2	1	27	4	1	4	1	4	1
506	E7EVJ5;Q96F07-2;Q96F07;E7EW33;H7C229;H0YL50;A0A087WVZ5;A0A087WVE1;A0A087WTQ3;A0A087X0D6;A0A087WWZ1	E7EVJ5;Q96F07-2;Q96F07;E7EW33;H7C229	Cytoplasmic FMR1-interacting protein 2	CYFIP2	tr|E7EVJ5|E7EVJ5_HUMAN Cytoplasmic FMR1-interacting protein 2 OS=Homo sapiens GN=CYFIP2 PE=1 SV=1;sp|Q96F07-2|CYFP2_HUMAN Isoform 2 of Cytoplasmic FMR1-interacting protein 2 OS=Homo sapiens GN=CYFIP2;sp|Q96F07|CYFP2_HUMAN Cytoplasmic FMR1-interacting prote	139510000	72885000	2832000	1860100	971800	87309000	120900000	7	7	1	6.4	6.4	0.9	142.58	0	16.444	212400000	15	5	4	8	7	11	6	4	6	4	1	0
507	E7EVX8;Q8WWY3;E7ESA8;Q8WWY3-3;Q8WWY3-2;E7EU94;E7ESX0;E7EN72	E7EVX8;Q8WWY3;E7ESA8;Q8WWY3-3;Q8WWY3-2;E7EU94;E7ESX0;E7EN72	U4/U6 small nuclear ribonucleoprotein Prp31	PRPF31	tr|E7EVX8|E7EVX8_HUMAN U4/U6 small nuclear ribonucleoprotein Prp31 OS=Homo sapiens GN=PRPF31 PE=1 SV=1;sp|Q8WWY3|PRP31_HUMAN U4/U6 small nuclear ribonucleoprotein Prp31 OS=Homo sapiens GN=PRPF31 PE=1 SV=2;tr|E7ESA8|E7ESA8_HUMAN U4/U6 small nuclear ribonucl	270210000	97946000	16007000	11748000	4258500	243970000	136370000	9	9	9	32.3	32.3	32.3	54.766	0	33.261	368150000	27	32.3	20.1	17	10	8	9	5	9	5	9	5
508	E7EWK3;Q9H2U1-3;Q9H2U1-2;Q9H2U1;H7C5F5	E7EWK3;Q9H2U1-3;Q9H2U1-2;Q9H2U1;H7C5F5	ATP-dependent RNA helicase DHX36	DHX36	tr|E7EWK3|E7EWK3_HUMAN ATP-dependent RNA helicase DHX36 (Fragment) OS=Homo sapiens GN=DHX36 PE=1 SV=1;sp|Q9H2U1-3|DHX36_HUMAN Isoform 3 of ATP-dependent RNA helicase DHX36 OS=Homo sapiens GN=DHX36;sp|Q9H2U1-2|DHX36_HUMAN Isoform 2 of ATP-dependent RNA heli	18617000	5095600	551440	432940	118500	16719000	0	2	2	2	3.6	3.6	3.6	91.43	0.00055897	4.0198	23712000	2	3.6	1.9	2	0	5	2	1	2	1	2	1
509	E7EWM1	E7EWM1		NCOA2	tr|E7EWM1|E7EWM1_HUMAN Nuclear receptor coactivator 2 OS=Homo sapiens GN=NCOA2 PE=1 SV=2	99996000	238780000	6775600	1999900	4775600	87217000	188530000	1	1	1	1.3	1.3	1.3	102.73	1	-2	338780000	4	1.3	1.3	1	3	1	1	1	1	1	1	1
510	E9PID8;E7EWR4;P33240-2;P33240;Q9H0L4	E9PID8;E7EWR4;P33240-2;P33240	Cleavage stimulation factor subunit 2	CSTF2	tr|E9PID8|E9PID8_HUMAN Cleavage stimulation factor subunit 2 OS=Homo sapiens GN=CSTF2 PE=1 SV=1;tr|E7EWR4|E7EWR4_HUMAN Cleavage stimulation factor subunit 2 OS=Homo sapiens GN=CSTF2 PE=1 SV=1;sp|P33240-2|CSTF2_HUMAN Isoform 2 of Cleavage stimulation factor	186550000	75850000	11927000	8479700	3447700	132290000	102820000	7	7	7	27.9	27.9	27.9	46.665	0	39.58	262400000	14	27.9	18.9	8	6	5	7	5	7	5	7	5
511	E9PDR0;E7EX59;P05166;P05166-2;E7EUY3;E7ETT1;C9JQS9;E7ETT4;E9PEC3;F8WBI9;E7ENC1;H7C5C9;C9JVW9;C9JAW3;C9JVY9	E9PDR0;E7EX59;P05166;P05166-2;E7EUY3;E7ETT1;C9JQS9;E7ETT4;E9PEC3;F8WBI9	Propionyl-CoA carboxylase beta chain, mitochondrial	PCCB	tr|E9PDR0|E9PDR0_HUMAN Propionyl-CoA carboxylase beta chain, mitochondrial OS=Homo sapiens GN=PCCB PE=1 SV=1;tr|E7EX59|E7EX59_HUMAN Propionyl-CoA carboxylase beta chain, mitochondrial OS=Homo sapiens GN=PCCB PE=1 SV=1;sp|P05166|PCCB_HUMAN Propionyl-CoA car	786470000	592450000	40557000	23132000	17425000	728470000	581550000	21	21	21	56.5	56.5	56.5	59.403	0	79.378	1378900000	69	49.5	40.5	45	24	15	18	15	18	15	18	15
512	E7EX90;Q14203-5;Q14203-2;Q14203-3;Q14203-4;Q14203-6;Q14203;E7EWF7;Q6AWB1	E7EX90;Q14203-5;Q14203-2;Q14203-3;Q14203-4;Q14203-6;Q14203;E7EWF7	Dynactin subunit 1	DCTN1	tr|E7EX90|E7EX90_HUMAN Uncharacterized protein OS=Homo sapiens GN=DCTN1 PE=1 SV=1;sp|Q14203-5|DCTN1_HUMAN Isoform 5 of Dynactin subunit 1 OS=Homo sapiens GN=DCTN1;sp|Q14203-2|DCTN1_HUMAN Isoform p135 of Dynactin subunit 1 OS=Homo sapiens GN=DCTN1;sp|Q14203	155820000	76447000	3271400	2194700	1076700	164420000	78904000	8	8	8	10.4	10.4	10.4	139.09	0	20.116	232270000	13	9.3	3	9	4	9	7	3	7	3	7	3
513	E9PAR2;G5E998;Q03060-23;Q03060-9;Q03060-24;Q03060-8;Q03060-32;Q03060-26;Q03060-21;Q03060-31;Q03060-6;E9PB41;C9IYM9;C9K092;J3KR46;J3KQC0;Q03060-11;Q03060-27;Q03060-10;Q03060-29;P18846-2;Q03060-28;Q03060-19;Q03060-14;Q03060-13;Q03060-30;Q03060-17;Q03060-2;Q03060-7;Q03060-12;P18846;Q03060-22;Q03060-20;Q03060-16;Q03060-15;Q03060-1;Q03060	E9PAR2;G5E998;Q03060-23;Q03060-9;Q03060-24;Q03060-8;Q03060-32;Q03060-26;Q03060-21;Q03060-31;Q03060-6;E9PB41;C9IYM9;C9K092;J3KR46;J3KQC0;Q03060-11;Q03060-27;Q03060-10;Q03060-29;P18846-2;Q03060-28;Q03060-19;Q03060-14;Q03060-13;Q03060-30;Q03060-17;Q03060-2;Q03060-7;Q03060-12;P18846;Q03060-22;Q03060-20;Q03060-16;Q03060-15;Q03060-1;Q03060	cAMP-responsive element modulator;Cyclic AMP-dependent transcription factor ATF-1	CREM;ATF1	tr|E9PAR2|E9PAR2_HUMAN cAMP-responsive element modulator OS=Homo sapiens GN=CREM PE=1 SV=1;tr|G5E998|G5E998_HUMAN cAMP-responsive element modulator OS=Homo sapiens GN=CREM PE=1 SV=2;sp|Q03060-23|CREM_HUMAN Isoform 20 of cAMP-responsive element modulator OS	19467000	10881000	7587000	4866700	2720300	28210000	17488000	2	1	1	42.1	32.6	32.6	10.918	0	11.203	30348000	4	42.1	32.6	1	3	37	2	1	1	1	1	1
514	F8VZJ2;F8W0W4;H0YHX9;Q13765;E9PAV3-2;E9PAV3;F8W1N5;F8VNW4;F8VZ58;Q9BZK3	F8VZJ2;F8W0W4;H0YHX9;Q13765;E9PAV3-2;E9PAV3;F8W1N5;F8VNW4	Nascent polypeptide-associated complex subunit alpha;Nascent polypeptide-associated complex subunit alpha, muscle-specific form	NACA	tr|F8VZJ2|F8VZJ2_HUMAN Nascent polypeptide-associated complex subunit alpha, muscle-specific form OS=Homo sapiens GN=NACA PE=1 SV=1;tr|F8W0W4|F8W0W4_HUMAN Nascent polypeptide-associated complex subunit alpha, muscle-specific form (Fragment) OS=Homo sapiens	334380000	210910000	90883000	55730000	35152000	255430000	201330000	4	4	4	40.4	40.4	40.4	15.016	0	47.691	545300000	20	40.4	40.4	13	7	10	4	4	4	4	4	4
515	F8W895;E9PAV9;Q5T3I0;Q5T3I0-3	F8W895;E9PAV9;Q5T3I0;Q5T3I0-3	G patch domain-containing protein 4	GPATCH4	tr|F8W895|F8W895_HUMAN G patch domain-containing protein 4 (Fragment) OS=Homo sapiens GN=GPATCH4 PE=1 SV=1;tr|E9PAV9|E9PAV9_HUMAN G patch domain-containing protein 4 OS=Homo sapiens GN=GPATCH4 PE=1 SV=1;sp|Q5T3I0|GPTC4_HUMAN G patch domain-containing prote	11114000	13810000	1466100	653790	812350	11415000	12948000	3	3	3	15.9	15.9	15.9	29.465	0.00032733	7.5084	24924000	5	15.9	10.6	3	2	4	3	2	3	2	3	2
516	F6PQP6;E9PBC1;O95208-3;O95208-2;O95208;I3L2B2;O95208-5	F6PQP6;E9PBC1;O95208-3;O95208-2;O95208;I3L2B2;O95208-5	Epsin-2	EPN2	tr|F6PQP6|F6PQP6_HUMAN Epsin-2 (Fragment) OS=Homo sapiens GN=EPN2 PE=1 SV=3;tr|E9PBC1|E9PBC1_HUMAN Epsin-2 OS=Homo sapiens GN=EPN2 PE=4 SV=1;sp|O95208-3|EPN2_HUMAN Isoform 3 of Epsin-2 OS=Homo sapiens GN=EPN2;sp|O95208-2|EPN2_HUMAN Isoform 2 of Epsin-2 OS=	17966000	11286000	1329600	816630	513000	10808000	23436000	2	2	2	10.7	10.7	10.7	44.976	0.00031626	6.5869	29252000	4	10.7	6.6	2	2	7	2	1	2	1	2	1
517	E9PBK7;E9PJF0;E9PQW4;P27361-2;P27361-3;P27361;H0YDH9;B3KR49;K7ELV1;K7EN18;P31152;Q16659	E9PBK7;E9PJF0;E9PQW4;P27361-2;P27361-3;P27361;H0YDH9;B3KR49	Mitogen-activated protein kinase;Mitogen-activated protein kinase 3	MAPK3	tr|E9PBK7|E9PBK7_HUMAN Mitogen-activated protein kinase 3 OS=Homo sapiens GN=MAPK3 PE=1 SV=1;tr|E9PJF0|E9PJF0_HUMAN Mitogen-activated protein kinase OS=Homo sapiens GN=MAPK3 PE=1 SV=1;tr|E9PQW4|E9PQW4_HUMAN Mitogen-activated protein kinase OS=Homo sapiens	13989000	7542300	1196200	777190	419010	13989000	8680200	4	1	1	19.3	7.4	7.4	35.968	0.0084986	1.9842	21532000	4	19.3	14.5	1	3	12	4	3	1	1	1	1
518	E9PBP6;P55157;A0A087WZS2;D6REL9;P55157-2	E9PBP6;P55157;A0A087WZS2	Microsomal triglyceride transfer protein large subunit	MTTP	tr|E9PBP6|E9PBP6_HUMAN Microsomal triglyceride transfer protein large subunit OS=Homo sapiens GN=MTTP PE=1 SV=1;sp|P55157|MTP_HUMAN Microsomal triglyceride transfer protein large subunit OS=Homo sapiens GN=MTTP PE=1 SV=1;tr|A0A087WZS2|A0A087WZS2_HUMAN Micr	3233500000	2287700000	102240000	59879000	42364000	3096300000	2563300000	33	33	33	44.6	44.6	44.6	102.64	0	323.31	5521100000	194	35.4	42.8	94	100	5	27	30	27	30	27	30
519	E9PBS1;P22234;P22234-2;D6RF62	E9PBS1;P22234;P22234-2;D6RF62	Multifunctional protein ADE2;Phosphoribosylaminoimidazole-succinocarboxamide synthase;Phosphoribosylaminoimidazole carboxylase	PAICS	tr|E9PBS1|E9PBS1_HUMAN Phosphoribosylaminoimidazole carboxylase (Fragment) OS=Homo sapiens GN=PAICS PE=1 SV=1;sp|P22234|PUR6_HUMAN Multifunctional protein ADE2 OS=Homo sapiens GN=PAICS PE=1 SV=3;sp|P22234-2|PUR6_HUMAN Isoform 2 of Multifunctional protein A	1006500000	661700000	64163000	38713000	25450000	891330000	619210000	17	17	17	42.1	42.1	42.1	45.651	0	133.96	1668200000	78	41.9	37.8	39	39	4	15	14	15	14	15	14
520	E9PC15;Q53H12;E9PG39	E9PC15;Q53H12;E9PG39	Acylglycerol kinase, mitochondrial	AGK	tr|E9PC15|E9PC15_HUMAN Acylglycerol kinase, mitochondrial OS=Homo sapiens GN=AGK PE=1 SV=1;sp|Q53H12|AGK_HUMAN Acylglycerol kinase, mitochondrial OS=Homo sapiens GN=AGK PE=1 SV=2;tr|E9PG39|E9PG39_HUMAN Acylglycerol kinase, mitochondrial OS=Homo sapiens GN=	2703300000	2295600000	227220000	122880000	104350000	2350300000	2608900000	16	16	16	57.6	57.6	57.6	43.796	0	181.56	4998900000	106	46.7	57.6	48	58	3	12	16	12	16	12	16
521	E9PC61;H3BQM0;Q8NDF8-2;Q8NDF8;Q8NDF8-3;Q8NDF8-5;Q8NDF8-4	E9PC61;H3BQM0;Q8NDF8-2;Q8NDF8;Q8NDF8-3;Q8NDF8-5;Q8NDF8-4	Non-canonical poly(A) RNA polymerase PAPD5	PAPD5	tr|E9PC61|E9PC61_HUMAN Non-canonical poly(A) RNA polymerase PAPD5 (Fragment) OS=Homo sapiens GN=PAPD5 PE=4 SV=2;tr|H3BQM0|H3BQM0_HUMAN Non-canonical poly(A) RNA polymerase PAPD5 OS=Homo sapiens GN=PAPD5 PE=1 SV=1;sp|Q8NDF8-2|PAPD5_HUMAN Isoform 2 of Non-ca	48625000	21542000	3189400	2210200	979200	47085000	21997000	3	3	3	16.5	16.5	16.5	34.286	0	9.7151	70168000	8	16.5	10.2	3	5	7	3	2	3	2	3	2
522	E9PC74;Q13144;C9JRD9;H7C2X0	E9PC74;Q13144	Translation initiation factor eIF-2B subunit epsilon	EIF2B5	tr|E9PC74|E9PC74_HUMAN Translation initiation factor eIF-2B subunit epsilon OS=Homo sapiens GN=EIF2B5 PE=1 SV=1;sp|Q13144|EI2BE_HUMAN Translation initiation factor eIF-2B subunit epsilon OS=Homo sapiens GN=EIF2B5 PE=1 SV=3	84707000	14493000	3100000	2647100	452900	82377000	29850000	5	5	5	9.2	9.2	9.2	78.346	0	13.562	99200000	7	9.2	1.7	6	1	4	5	1	5	1	5	1
523	Q6N039;E9PC87;O94876-2;O94876	Q6N039;E9PC87;O94876-2;O94876	Transmembrane and coiled-coil domains protein 1	DKFZp686H13261;TMCC1	tr|Q6N039|Q6N039_HUMAN Putative uncharacterized protein DKFZp686H13261 OS=Homo sapiens GN=DKFZp686H13261 PE=1 SV=1;tr|E9PC87|E9PC87_HUMAN Transmembrane and coiled-coil domains protein 1 OS=Homo sapiens GN=TMCC1 PE=1 SV=1;sp|O94876-2|TMCC1_HUMAN Isoform 2 o	38130000	0	2006800	2006800	0	34065000	0	1	1	1	6.7	6.7	6.7	36.521	0	23.342	38130000	3	6.7	0	3	0	4	1	0	1	0	1	0
524	E9PCG9;Q02338;H7C2W1;C9K0G7;C9JM78;C9JQ90	E9PCG9;Q02338;H7C2W1;C9K0G7	D-beta-hydroxybutyrate dehydrogenase, mitochondrial	BDH1	tr|E9PCG9|E9PCG9_HUMAN D-beta-hydroxybutyrate dehydrogenase, mitochondrial OS=Homo sapiens GN=BDH1 PE=3 SV=1;sp|Q02338|BDH_HUMAN D-beta-hydroxybutyrate dehydrogenase, mitochondrial OS=Homo sapiens GN=BDH1 PE=1 SV=3;tr|H7C2W1|H7C2W1_HUMAN D-beta-hydroxybuty	63839000	23253000	5443300	3989900	1453300	66017000	27747000	4	4	4	29.3	29.3	29.3	29.012	0	20.107	87092000	9	29.3	14.8	7	2	6	4	2	4	2	4	2
525	K7EJC8;E9PCW1;O95249;B4DQA8;G5E9T8;A0A087WYX5;Q96QI9;F6RU00;O95249-2	K7EJC8;E9PCW1;O95249;B4DQA8;G5E9T8;A0A087WYX5;Q96QI9;F6RU00;O95249-2	Golgi SNAP receptor complex member 1	GOSR1	tr|K7EJC8|K7EJC8_HUMAN Golgi SNAP receptor complex member 1 OS=Homo sapiens GN=GOSR1 PE=1 SV=1;tr|E9PCW1|E9PCW1_HUMAN Golgi SNAP receptor complex member 1 OS=Homo sapiens GN=GOSR1 PE=1 SV=1;sp|O95249|GOSR1_HUMAN Golgi SNAP receptor complex member 1 OS=Homo	215530000	269400000	25522000	11344000	14179000	202230000	263160000	6	6	6	29.7	29.7	29.7	26.989	0	38.93	484930000	23	29.7	18.2	13	10	9	6	4	6	4	6	4
526	E9PDE8;O95757;D6RJ96	E9PDE8;O95757;D6RJ96	Heat shock 70 kDa protein 4L	HSPA4L	tr|E9PDE8|E9PDE8_HUMAN Heat shock 70 kDa protein 4L OS=Homo sapiens GN=HSPA4L PE=1 SV=1;sp|O95757|HS74L_HUMAN Heat shock 70 kDa protein 4L OS=Homo sapiens GN=HSPA4L PE=1 SV=3;tr|D6RJ96|D6RJ96_HUMAN Heat shock 70 kDa protein 4L (Fragment) OS=Homo sapiens GN	31166000	25347000	926440	510910	415530	26410000	40018000	8	6	6	15.5	12.1	12.1	91.953	0	10.32	56513000	9	9.6	10	4	5	3	5	5	3	4	3	4
527	E9PDF6;O43795;E7EQD9;H7C2Y7;C9JYW1;C9JUP5;C9K0I9	E9PDF6;O43795	Unconventional myosin-Ib	MYO1B	tr|E9PDF6|E9PDF6_HUMAN Unconventional myosin-Ib OS=Homo sapiens GN=MYO1B PE=1 SV=1;sp|O43795|MYO1B_HUMAN Unconventional myosin-Ib OS=Homo sapiens GN=MYO1B PE=1 SV=3	4599700000	4408400000	130550000	66662000	63889000	4728400000	4688400000	40	40	1	41.7	41.7	1.4	128.48	0	323.31	9008000000	296	40.4	33.9	139	157	7	39	33	39	33	1	1
528	E9PDI4;O00515;H0Y901	E9PDI4;O00515	Ladinin-1	LAD1	tr|E9PDI4|E9PDI4_HUMAN Ladinin-1 OS=Homo sapiens GN=LAD1 PE=1 SV=1;sp|O00515|LAD1_HUMAN Ladinin-1 OS=Homo sapiens GN=LAD1 PE=1 SV=2	97292000	194850000	7125400	2373000	4752400	130410000	163320000	6	6	6	16.6	16.6	16.6	58.677	0	15.713	292140000	8	13.4	14.1	5	3	3	4	5	4	5	4	5
529	E9PDM8;O94855;O94855-2;E9PC44	E9PDM8;O94855;O94855-2;E9PC44	Protein transport protein Sec24D	SEC24D	tr|E9PDM8|E9PDM8_HUMAN Protein transport protein Sec24D OS=Homo sapiens GN=SEC24D PE=1 SV=1;sp|O94855|SC24D_HUMAN Protein transport protein Sec24D OS=Homo sapiens GN=SEC24D PE=1 SV=2;sp|O94855-2|SC24D_HUMAN Isoform 2 of Protein transport protein Sec24D OS=	24747000	19478000	1263600	707070	556520	0	23899000	4	4	4	8	8	8	74.953	0.00031867	6.7684	44226000	3	3.2	4.8	0	3	4	2	2	2	2	2	2
530	E9PDU6;Q15417-2;Q15417;Q15417-3	E9PDU6;Q15417-2;Q15417;Q15417-3	Calponin;Calponin-3	CNN3	tr|E9PDU6|E9PDU6_HUMAN Calponin (Fragment) OS=Homo sapiens GN=CNN3 PE=1 SV=1;sp|Q15417-2|CNN3_HUMAN Isoform 2 of Calponin-3 OS=Homo sapiens GN=CNN3;sp|Q15417|CNN3_HUMAN Calponin-3 OS=Homo sapiens GN=CNN3 PE=1 SV=1;sp|Q15417-3|CNN3_HUMAN Isoform 3 of Calpon	34157000	16270000	4584300	3105200	1479100	30430000	21620000	2	2	2	16.2	16.2	16.2	20.208	0.00054526	3.6468	50427000	4	16.2	10.3	2	2	4	2	1	2	1	2	1
531	E9PE17;I3L0E3;Q9Y2R5	E9PE17;I3L0E3;Q9Y2R5	28S ribosomal protein S17, mitochondrial	MRPS17;hCG_1984214	tr|E9PE17|E9PE17_HUMAN 28S ribosomal protein S17, mitochondrial (Fragment) OS=Homo sapiens GN=MRPS17 PE=3 SV=1;tr|I3L0E3|I3L0E3_HUMAN 28S ribosomal protein S17, mitochondrial OS=Homo sapiens GN=MRPS17 PE=3 SV=1;sp|Q9Y2R5|RT17_HUMAN 28S ribosomal protein S1	593650000	702240000	161990000	74206000	87780000	779220000	816070000	4	4	4	51.9	51.9	51.9	14.374	0	62.081	1295900000	26	51.9	51.9	11	15	3	4	4	4	4	4	4
532	E9PEJ6;P98196;H0Y547;H0Y624;A2A3G9;H0Y8F0	E9PEJ6;P98196;H0Y547	Phospholipid-transporting ATPase;Probable phospholipid-transporting ATPase IH	ATP11A	tr|E9PEJ6|E9PEJ6_HUMAN Probable phospholipid-transporting ATPase IH OS=Homo sapiens GN=ATP11A PE=1 SV=1;sp|P98196|AT11A_HUMAN Probable phospholipid-transporting ATPase IH OS=Homo sapiens GN=ATP11A PE=1 SV=3;tr|H0Y547|H0Y547_HUMAN Probable phospholipid-tran	23142000	490930000	8427400	379370	8048100	310760000	385710000	5	5	5	6.1	6.1	6.1	135.85	0	19.194	514070000	9	4.4	3.7	3	6	6	3	3	3	3	3	3
533	E9PEM5;P50851-2;P50851;H0YAC6;H0Y9N9	E9PEM5;P50851-2;P50851;H0YAC6	Lipopolysaccharide-responsive and beige-like anchor protein	LRBA	tr|E9PEM5|E9PEM5_HUMAN Lipopolysaccharide-responsive and beige-like anchor protein OS=Homo sapiens GN=LRBA PE=1 SV=1;sp|P50851-2|LRBA_HUMAN Isoform 2 of Lipopolysaccharide-responsive and beige-like anchor protein OS=Homo sapiens GN=LRBA;sp|P50851|LRBA_HUMA	0	42381000	309350	0	309350	0	59554000	4	4	4	2.2	2.2	2.2	286.97	0.00030703	5.8063	42381000	4	1	1.7	2	2	5	2	3	2	3	2	3
534	E9PEN0;Q8WYH8-2;Q8WYH8	E9PEN0;Q8WYH8-2;Q8WYH8	Inhibitor of growth protein 5	ING5	tr|E9PEN0|E9PEN0_HUMAN Inhibitor of growth protein 5 OS=Homo sapiens GN=ING5 PE=1 SV=1;sp|Q8WYH8-2|ING5_HUMAN Isoform 2 of Inhibitor of growth protein 5 OS=Homo sapiens GN=ING5;sp|Q8WYH8|ING5_HUMAN Inhibitor of growth protein 5 OS=Homo sapiens GN=ING5 PE=1	23214000	0	2110400	2110400	0	23194000	0	1	1	1	15.5	15.5	15.5	16.646	0	23.949	23214000	1	15.5	0	1	0	3	1	0	1	0	1	0
535	E9PER6;O15530-2;O15530-3;O15530;O15530-4;Q6A1A2;O15530-5	E9PER6;O15530-2;O15530-3;O15530;O15530-4	3-phosphoinositide-dependent protein kinase 1	PDPK1	tr|E9PER6|E9PER6_HUMAN 3-phosphoinositide-dependent protein kinase 1 OS=Homo sapiens GN=PDPK1 PE=1 SV=1;sp|O15530-2|PDPK1_HUMAN Isoform 2 of 3-phosphoinositide-dependent protein kinase 1 OS=Homo sapiens GN=PDPK1;sp|O15530-3|PDPK1_HUMAN Isoform 3 of 3-phosp	21844000	10183000	1067600	728130	339440	21545000	0	3	3	3	8.1	8.1	8.1	60.328	0.00078906	3.2029	32027000	2	6.4	1.7	2	0	7	2	1	2	1	2	1
536	E9PF18;Q16836;Q16836-3;Q16836-2	E9PF18;Q16836;Q16836-3;Q16836-2	Hydroxyacyl-coenzyme A dehydrogenase, mitochondrial	HADH	tr|E9PF18|E9PF18_HUMAN Hydroxyacyl-coenzyme A dehydrogenase, mitochondrial OS=Homo sapiens GN=HADH PE=1 SV=1;sp|Q16836|HCDH_HUMAN Hydroxyacyl-coenzyme A dehydrogenase, mitochondrial OS=Homo sapiens GN=HADH PE=1 SV=3;sp|Q16836-3|HCDH_HUMAN Isoform 3 of Hydr	1928600000	1190300000	141770000	87666000	54103000	1732700000	1115300000	9	9	9	50	50	50	35.236	0	100.21	3118900000	97	50	50	39	58	4	9	9	9	9	9	9
537	E9PF19;Q9Y4P3;Q96E41;A0A087WXC6;F8WDI9;F8WCR3	E9PF19;Q9Y4P3;Q96E41	Transducin beta-like protein 2	TBL2	tr|E9PF19|E9PF19_HUMAN Transducin beta-like protein 2 OS=Homo sapiens GN=TBL2 PE=1 SV=1;sp|Q9Y4P3|TBL2_HUMAN Transducin beta-like protein 2 OS=Homo sapiens GN=TBL2 PE=1 SV=1;tr|Q96E41|Q96E41_HUMAN TBL2 protein OS=Homo sapiens GN=TBL2 PE=1 SV=1	1761000000	1649400000	113680000	58701000	54981000	1496300000	1685100000	21	21	21	61.6	61.6	61.6	45.935	0	140.56	3410400000	83	53.8	47	40	43	6	19	15	19	15	19	15
538	E9PFE2;Q9UHL9-2;Q9UHL9;Q9UHL9-3	E9PFE2;Q9UHL9-2;Q9UHL9;Q9UHL9-3	General transcription factor II-I repeat domain-containing protein 1	GTF2IRD1	tr|E9PFE2|E9PFE2_HUMAN General transcription factor II-I repeat domain-containing protein 1 OS=Homo sapiens GN=GTF2IRD1 PE=1 SV=1;sp|Q9UHL9-2|GT2D1_HUMAN Isoform 2 of General transcription factor II-I repeat domain-containing protein 1 OS=Homo sapiens GN=G	2936900	0	46618	46618	0	4256100	0	1	1	1	1.8	1.8	1.8	106.05	0.0074145	2.1043	2936900	0	1.8	0	0	0	4	1	0	1	0	1	0
539	E9PFR3;Q14738-3;Q14738-2;Q14738;H0Y8C4;H7C5Q9	E9PFR3;Q14738-3;Q14738-2;Q14738;H0Y8C4;H7C5Q9	Serine/threonine-protein phosphatase 2A 56 kDa regulatory subunit delta isoform	PPP2R5D	tr|E9PFR3|E9PFR3_HUMAN Serine/threonine-protein phosphatase 2A 56 kDa regulatory subunit delta isoform OS=Homo sapiens GN=PPP2R5D PE=1 SV=1;sp|Q14738-3|2A5D_HUMAN Isoform Delta-3 of Serine/threonine-protein phosphatase 2A 56 kDa regulatory subunit delta is	30267000	13821000	1377700	945850	431900	22192000	21571000	4	3	3	8.2	6.2	6.2	69.116	0.00054825	3.7108	44088000	5	8.2	6.7	3	2	6	4	3	3	2	3	2
540	E9PFZ2;P00450;H7C5R1;CON__ENSEMBL:ENSBTAP00000031900	E9PFZ2;P00450;H7C5R1	Ceruloplasmin	CP	tr|E9PFZ2|E9PFZ2_HUMAN Ceruloplasmin OS=Homo sapiens GN=CP PE=4 SV=1;sp|P00450|CERU_HUMAN Ceruloplasmin OS=Homo sapiens GN=CP PE=1 SV=1;tr|H7C5R1|H7C5R1_HUMAN Ceruloplasmin (Fragment) OS=Homo sapiens GN=CP PE=4 SV=1	45103000	88355000	2669200	902060	1767100	50039000	58907000	4	4	4	5.5	5.5	5.5	108.82	0	7.6388	133460000	6	4	3	4	2	4	3	2	3	2	3	2
541	H7C0V9;E9PG40;P05067-10;P05067-3;P05067-4;P05067-5;P05067-6;P05067-7;P05067-11;P05067-8;P05067-9;P05067;P05067-2	H7C0V9;E9PG40;P05067-10;P05067-3;P05067-4;P05067-5;P05067-6;P05067-7;P05067-11;P05067-8;P05067-9;P05067;P05067-2	Amyloid beta A4 protein;N-APP;Soluble APP-alpha;Soluble APP-beta;C99;Beta-amyloid protein 42;Beta-amyloid protein 40;C83;P3(42);P3(40);C80;Gamma-secretase C-terminal fragment 59;Gamma-secretase C-terminal fragment 57;Gamma-secretase C-terminal fragment 50;C31	APP	tr|H7C0V9|H7C0V9_HUMAN Amyloid beta A4 protein (Fragment) OS=Homo sapiens GN=APP PE=1 SV=1;tr|E9PG40|E9PG40_HUMAN Amyloid beta A4 protein OS=Homo sapiens GN=APP PE=1 SV=1;sp|P05067-10|A4_HUMAN Isoform APP639 of Amyloid beta A4 protein OS=Homo sapiens GN=AP	0	12578000	571750	0	571750	0	14476000	2	2	2	5.8	5.8	5.8	54.981	0.00029394	4.84	12578000	2	0	5.8	0	2	13	0	2	0	2	0	2
542	E9PG71;P54764-2;P54764;C9JEM6	E9PG71;P54764-2;P54764;C9JEM6	Receptor protein-tyrosine kinase;Ephrin type-A receptor 4	EPHA4	tr|E9PG71|E9PG71_HUMAN Ephrin type-A receptor 4 OS=Homo sapiens GN=EPHA4 PE=1 SV=1;sp|P54764-2|EPHA4_HUMAN Isoform 2 of Ephrin type-A receptor 4 OS=Homo sapiens GN=EPHA4;sp|P54764|EPHA4_HUMAN Ephrin type-A receptor 4 OS=Homo sapiens GN=EPHA4 PE=1 SV=1;tr|C	331330000	278620000	10892000	5916600	4975300	286140000	325040000	2	1	1	2.5	1.4	1.4	105.71	0.0080569	2.0134	609950000	6	2.5	2.5	2	4	4	2	2	1	1	1	1
543	Q5TG12;E9PGC5;Q15262;Q15262-2;Q15262-3;Q15262-4;H0Y6P5;H0Y6V4	Q5TG12;E9PGC5;Q15262;Q15262-2;Q15262-3;Q15262-4	Protein-tyrosine-phosphatase;Receptor-type tyrosine-protein phosphatase kappa	PTPRK	tr|Q5TG12|Q5TG12_HUMAN Receptor-type tyrosine-protein phosphatase kappa OS=Homo sapiens GN=PTPRK PE=4 SV=1;tr|E9PGC5|E9PGC5_HUMAN Receptor-type tyrosine-protein phosphatase kappa OS=Homo sapiens GN=PTPRK PE=4 SV=1;sp|Q15262|PTPRK_HUMAN Receptor-type tyrosi	203410000	117240000	4333100	2748700	1584400	152260000	175970000	10	10	10	9.9	9.9	9.9	164.2	0	25.434	320650000	25	8.2	6.1	15	10	8	8	6	8	6	8	6
544	F8WF63;F8WCA5;E9PGM9;P78332-2;P78332	F8WF63;F8WCA5;E9PGM9;P78332-2;P78332	RNA-binding protein 6	RBM6	tr|F8WF63|F8WF63_HUMAN RNA-binding protein 6 OS=Homo sapiens GN=RBM6 PE=4 SV=1;tr|F8WCA5|F8WCA5_HUMAN RNA-binding protein 6 OS=Homo sapiens GN=RBM6 PE=1 SV=1;tr|E9PGM9|E9PGM9_HUMAN RNA-binding protein 6 OS=Homo sapiens GN=RBM6 PE=1 SV=1;sp|P78332-2|RBM6_HU	1265500	3975400	349390	84367	265020	1052500	5103700	1	1	1	8	8	8	23.425	0.0012528	2.7071	5240900	2	8	8	1	1	5	1	1	1	1	1	1
545	E9PGT1;Q15631;H7C1D4;Q15631-2	E9PGT1;Q15631;H7C1D4	Translin	TSN	tr|E9PGT1|E9PGT1_HUMAN Translin OS=Homo sapiens GN=TSN PE=1 SV=1;sp|Q15631|TSN_HUMAN Translin OS=Homo sapiens GN=TSN PE=1 SV=1;tr|H7C1D4|H7C1D4_HUMAN Translin (Fragment) OS=Homo sapiens GN=TSN PE=1 SV=1	159660000	176520000	22412000	10644000	11768000	172790000	168620000	5	5	5	33.2	33.2	33.2	25.572	0	20.057	336180000	19	27.4	21.5	12	7	4	4	3	4	3	4	3
546	H7C3S9;E9PGT6;Q99627-2;Q99627	H7C3S9;E9PGT6;Q99627-2;Q99627	COP9 signalosome complex subunit 8	COPS8	tr|H7C3S9|H7C3S9_HUMAN COP9 signalosome complex subunit 8 (Fragment) OS=Homo sapiens GN=COPS8 PE=1 SV=1;tr|E9PGT6|E9PGT6_HUMAN COP9 signalosome complex subunit 8 OS=Homo sapiens GN=COPS8 PE=1 SV=1;sp|Q99627-2|CSN8_HUMAN Isoform 2 of COP9 signalosome comple	28532000	0	7132900	7132900	0	41347000	0	1	1	1	25.3	25.3	25.3	8.9341	0.0089412	1.9583	28532000	3	25.3	0	3	0	4	1	0	1	0	1	0
547	H0Y8E4;E9PH70;Q9ULH0-2;Q9ULH0-4;Q9ULH0;Q9ULH0-3;H7C584	H0Y8E4;E9PH70;Q9ULH0-2;Q9ULH0-4;Q9ULH0;Q9ULH0-3	Kinase D-interacting substrate of 220 kDa	KIDINS220	tr|H0Y8E4|H0Y8E4_HUMAN Kinase D-interacting substrate of 220 kDa (Fragment) OS=Homo sapiens GN=KIDINS220 PE=1 SV=1;tr|E9PH70|E9PH70_HUMAN Kinase D-interacting substrate of 220 kDa (Fragment) OS=Homo sapiens GN=KIDINS220 PE=1 SV=1;sp|Q9ULH0-2|KDIS_HUMAN Iso	28094000	10218000	638530	468230	170300	24096000	20834000	6	6	6	6.7	6.7	6.7	118.38	0	7.9785	38312000	6	6.7	2	5	1	7	6	1	6	1	6	1
548	E9PHF7;Q96RQ3;E9PG35;F5GYT8;G5E9X5	E9PHF7;Q96RQ3;E9PG35;F5GYT8;G5E9X5	Methylcrotonoyl-CoA carboxylase subunit alpha, mitochondrial	MCCC1	tr|E9PHF7|E9PHF7_HUMAN Methylcrotonoyl-CoA carboxylase subunit alpha, mitochondrial OS=Homo sapiens GN=MCCC1 PE=1 SV=1;sp|Q96RQ3|MCCA_HUMAN Methylcrotonoyl-CoA carboxylase subunit alpha, mitochondrial OS=Homo sapiens GN=MCCC1 PE=1 SV=3;tr|E9PG35|E9PG35_HUM	320300000	192590000	13862000	8656900	5205200	320490000	240930000	12	12	12	33.4	33.4	33.4	68.331	0	53.885	512900000	30	31.7	23.5	17	13	5	11	8	11	8	11	8
549	E9PHG5;Q6UW02;Q6UW02-2;C9J8K7;F8WBE2;Q8WZ13	E9PHG5;Q6UW02;Q6UW02-2;C9J8K7;F8WBE2	Cytochrome P450 20A1	CYP20A1	tr|E9PHG5|E9PHG5_HUMAN Cytochrome P450 20A1 OS=Homo sapiens GN=CYP20A1 PE=4 SV=1;sp|Q6UW02|CP20A_HUMAN Cytochrome P450 20A1 OS=Homo sapiens GN=CYP20A1 PE=2 SV=1;sp|Q6UW02-2|CP20A_HUMAN Isoform 2 of Cytochrome P450 20A1 OS=Homo sapiens GN=CYP20A1;tr|C9J8K7|	509470000	627610000	42114000	18869000	23245000	438000000	556170000	14	14	14	43.2	43.2	43.2	53.448	0	98.349	1137100000	38	29.8	28.3	16	22	6	10	9	10	9	10	9
550	E9PHH9;Q9BUI4	E9PHH9;Q9BUI4	DNA-directed RNA polymerase III subunit RPC3	POLR3C	tr|E9PHH9|E9PHH9_HUMAN DNA-directed RNA polymerase III subunit RPC3 OS=Homo sapiens GN=POLR3C PE=1 SV=1;sp|Q9BUI4|RPC3_HUMAN DNA-directed RNA polymerase III subunit RPC3 OS=Homo sapiens GN=POLR3C PE=1 SV=1	3400500	0	117260	117260	0	4927800	0	1	1	1	4.1	4.1	4.1	46.189	0.0074109	2.1011	3400500	2	4.1	0	2	0	2	1	0	1	0	1	0
551	E9PHI4;O94901-9;O94901-5;O94901-8;O94901;H0Y742;H0Y6N5;O94901-6;H7C2K3;H7C3X3;O94901-2;O94901-7;O94901-3;C9JS54;C9JJU6;C9K051;H7C019;C9JK55	E9PHI4;O94901-9;O94901-5;O94901-8;O94901;H0Y742;H0Y6N5;O94901-6;H7C2K3	SUN domain-containing protein 1	SUN1	tr|E9PHI4|E9PHI4_HUMAN SUN domain-containing protein 1 OS=Homo sapiens GN=SUN1 PE=1 SV=1;sp|O94901-9|SUN1_HUMAN Isoform 9 of SUN domain-containing protein 1 OS=Homo sapiens GN=SUN1;sp|O94901-5|SUN1_HUMAN Isoform 5 of SUN domain-containing protein 1 OS=Homo	344190000	663680000	22906000	7822400	15084000	245850000	649520000	14	14	14	24.3	24.3	24.3	91.112	0	110.12	1007900000	25	17.6	14.5	10	15	18	9	9	9	9	9	9
552	E9PHI6;Q9Y6G9	E9PHI6;Q9Y6G9	Cytoplasmic dynein 1 light intermediate chain 1	DYNC1LI1	tr|E9PHI6|E9PHI6_HUMAN Cytoplasmic dynein 1 light intermediate chain 1 OS=Homo sapiens GN=DYNC1LI1 PE=1 SV=1;sp|Q9Y6G9|DC1L1_HUMAN Cytoplasmic dynein 1 light intermediate chain 1 OS=Homo sapiens GN=DYNC1LI1 PE=1 SV=3	20616000	0	824630	824630	0	29875000	0	1	1	1	2.9	2.9	2.9	43.193	0.0076445	2.0942	20616000	1	2.9	0	1	0	2	1	0	1	0	1	0
553	E9PHV5;P28290-2;P28290-3;P28290;E7EUL7;H7BZ26	E9PHV5;P28290-2;P28290-3;P28290;E7EUL7	Sperm-specific antigen 2	SSFA2	tr|E9PHV5|E9PHV5_HUMAN Sperm-specific antigen 2 OS=Homo sapiens GN=SSFA2 PE=1 SV=1;sp|P28290-2|SSFA2_HUMAN Isoform 2 of Sperm-specific antigen 2 OS=Homo sapiens GN=SSFA2;sp|P28290-3|SSFA2_HUMAN Isoform 3 of Sperm-specific antigen 2 OS=Homo sapiens GN=SSFA2	34598000	26239000	833390	473950	359440	19458000	52828000	3	3	3	5	5	5	136.14	0	9.3071	60837000	7	4	2.7	3	4	6	2	2	2	2	2	2
554	E9PHX8;Q12866;A0A087WZQ5;H7C3L9	E9PHX8;Q12866;A0A087WZQ5	Receptor protein-tyrosine kinase;Tyrosine-protein kinase Mer	MERTK	tr|E9PHX8|E9PHX8_HUMAN Tyrosine-protein kinase Mer OS=Homo sapiens GN=MERTK PE=1 SV=1;sp|Q12866|MERTK_HUMAN Tyrosine-protein kinase Mer OS=Homo sapiens GN=MERTK PE=1 SV=2;tr|A0A087WZQ5|A0A087WZQ5_HUMAN Tyrosine-protein kinase Mer OS=Homo sapiens GN=MERTK P	0	11805000	268290	0	268290	0	6885300	3	3	3	4	4	4	91.021	0.0005777	4.5198	11805000	4	2.6	1.5	2	2	4	2	1	2	1	2	1
555	E9PHY5;O43491-4;E9PK52;O43491-3;I6L9B1;E9PII3;O43491-2;E9PQD2;E9PQN0;E9PRG1;E9PIG0;E9PJP4;E9PPC9;J3QS55	E9PHY5;O43491-4;E9PK52;O43491-3;I6L9B1;E9PII3;O43491-2	Band 4.1-like protein 2	EPB41L2	tr|E9PHY5|E9PHY5_HUMAN Band 4.1-like protein 2 OS=Homo sapiens GN=EPB41L2 PE=1 SV=1;sp|O43491-4|E41L2_HUMAN Isoform 4 of Band 4.1-like protein 2 OS=Homo sapiens GN=EPB41L2;tr|E9PK52|E9PK52_HUMAN Band 4.1-like protein 2 OS=Homo sapiens GN=EPB41L2 PE=1 SV=1;	85153000	61824000	2624600	1520600	1104000	67057000	77407000	26	1	0	42.9	1.3	0	104.36	0	42.575	146980000	4	42.9	34.1	2	2	14	26	22	1	1	0	0
556	E9PKA7;E9PI08;Q9Y256	E9PKA7;E9PI08;Q9Y256	CAAX prenyl protease 2	RCE1	tr|E9PKA7|E9PKA7_HUMAN CAAX prenyl protease 2 OS=Homo sapiens GN=RCE1 PE=4 SV=1;tr|E9PI08|E9PI08_HUMAN CAAX prenyl protease 2 OS=Homo sapiens GN=RCE1 PE=1 SV=1;sp|Q9Y256|FACE2_HUMAN CAAX prenyl protease 2 OS=Homo sapiens GN=RCE1 PE=1 SV=1	125360000	64513000	27125000	17909000	9216200	59036000	65941000	2	2	2	13.1	13.1	13.1	22.712	0	13.316	189870000	10	13.1	13.1	6	4	3	2	2	2	2	2	2
557	H0Y7B4;F6XDC4;E9PSF3;E9PI60;Q9ULD4-3;Q9ULD4-2;Q9ULD4	H0Y7B4;F6XDC4;E9PSF3;E9PI60;Q9ULD4-3;Q9ULD4-2;Q9ULD4	Bromodomain and PHD finger-containing protein 3	BRPF3	tr|H0Y7B4|H0Y7B4_HUMAN Bromodomain and PHD finger-containing protein 3 (Fragment) OS=Homo sapiens GN=BRPF3 PE=1 SV=1;tr|F6XDC4|F6XDC4_HUMAN Bromodomain and PHD finger-containing protein 3 OS=Homo sapiens GN=BRPF3 PE=1 SV=1;tr|E9PSF3|E9PSF3_HUMAN Bromodomai	0	0	0	0	0	0	0	2	2	2	5.5	5.5	5.5	67.964	0.0034423	2.4542	0	2	5.5	0	2	0	7	2	0	2	0	2	0
558	U3KQ69;E9PI62;Q9BT17;E7EVK2;Q9BT17-2	U3KQ69;E9PI62;Q9BT17;E7EVK2;Q9BT17-2	Mitochondrial GTPase 1;Mitochondrial ribosome-associated GTPase 1	MTG1	tr|U3KQ69|U3KQ69_HUMAN Mitochondrial GTPase 1 OS=Homo sapiens GN=MTG1 PE=3 SV=1;tr|E9PI62|E9PI62_HUMAN Mitochondrial GTPase 1 OS=Homo sapiens PE=3 SV=1;sp|Q9BT17|MTG1_HUMAN Mitochondrial ribosome-associated GTPase 1 OS=Homo sapiens GN=MTG1 PE=1 SV=2;tr|E7E	109380000	0	5208600	5208600	0	84673000	0	6	6	6	28.7	28.7	28.7	32.612	0	10.454	109380000	9	28.7	0	9	0	5	6	0	6	0	6	0
559	E9PIE4	E9PIE4		MTCH2	tr|E9PIE4|E9PIE4_HUMAN Mitochondrial carrier homolog 2 (Fragment) OS=Homo sapiens GN=MTCH2 PE=1 SV=3	130350000	110460000	21891000	11850000	10042000	154330000	89638000	12	1	1	60.1	4.6	4.6	28.662	0	32.307	240800000	7	59.7	60.1	3	4	1	11	12	1	1	1	1
560	E9PIF2;Q13206	E9PIF2;Q13206	Probable ATP-dependent RNA helicase DDX10	DDX10	tr|E9PIF2|E9PIF2_HUMAN Probable ATP-dependent RNA helicase DDX10 OS=Homo sapiens GN=DDX10 PE=1 SV=1;sp|Q13206|DDX10_HUMAN Probable ATP-dependent RNA helicase DDX10 OS=Homo sapiens GN=DDX10 PE=1 SV=2	642660000	350330000	19860000	12853000	7006700	503130000	503540000	20	20	20	31.4	31.4	31.4	96.454	0	119.39	992990000	53	27.5	20.6	31	22	2	18	12	18	12	18	12
561	E9PIZ4;E9PSD5;E9PPQ5;Q9UHD1;Q9UHD1-2	E9PIZ4;E9PSD5;E9PPQ5;Q9UHD1;Q9UHD1-2	Cysteine and histidine-rich domain-containing protein 1	CHORDC1	tr|E9PIZ4|E9PIZ4_HUMAN Cysteine and histidine-rich domain-containing protein 1 OS=Homo sapiens GN=CHORDC1 PE=1 SV=1;tr|E9PSD5|E9PSD5_HUMAN Cysteine and histidine-rich domain-containing protein 1 OS=Homo sapiens GN=CHORDC1 PE=1 SV=1;tr|E9PPQ5|E9PPQ5_HUMAN C	52610000	6582000	6576900	5845500	731340	35344000	27839000	2	2	2	26.7	26.7	26.7	13.143	0.00030248	5.494	59192000	4	26.7	13.8	3	1	5	2	1	2	1	2	1
562	E9PJ95;Q9P000-2;Q9P000	E9PJ95;Q9P000-2;Q9P000	COMM domain-containing protein 9	COMMD9	tr|E9PJ95|E9PJ95_HUMAN COMM domain-containing protein 9 OS=Homo sapiens GN=COMMD9 PE=1 SV=1;sp|Q9P000-2|COMD9_HUMAN Isoform 2 of COMM domain-containing protein 9 OS=Homo sapiens GN=COMMD9;sp|Q9P000|COMD9_HUMAN COMM domain-containing protein 9 OS=Homo sapie	23750000	0	2159100	2159100	0	17627000	0	2	2	2	20	20	20	20.687	0	9.2645	23750000	4	20	0	4	0	3	2	0	2	0	2	0
563	E9PJN0;O14734;H7C5A7;Q9BR14;E9PMC4;E9PIS4;E9PRD4;H0Y698;F6VBM3	E9PJN0;O14734;H7C5A7;Q9BR14;E9PMC4;E9PIS4;E9PRD4	Acyl-coenzyme A thioesterase 8	ACOT8	tr|E9PJN0|E9PJN0_HUMAN Acyl-coenzyme A thioesterase 8 OS=Homo sapiens GN=ACOT8 PE=1 SV=1;sp|O14734|ACOT8_HUMAN Acyl-coenzyme A thioesterase 8 OS=Homo sapiens GN=ACOT8 PE=1 SV=1;tr|H7C5A7|H7C5A7_HUMAN Acyl-coenzyme A thioesterase 8 (Fragment) OS=Homo sapien	155940000	348360000	33620000	10396000	23224000	233300000	344350000	4	4	4	30.1	30.1	30.1	25.116	0	15.167	504300000	13	30.1	21.7	7	6	9	4	3	4	3	4	3
564	E9PK01;P29692;A0A087X1X7;E9PRY8;P29692-3;P29692-2;E9PQ49;E9PI39;E9PPR1;E9PL12;E9PL71;E9PQZ1;P29692-4;E9PMW7;E9PN91;E9PIZ1;H0YCK7;H0YE58;E9PK06;H0YE72;E9PQC9;E9PKK3;E9PK72;E9PNW6;E9PJD0	E9PK01;P29692;A0A087X1X7;E9PRY8;P29692-3;P29692-2;E9PQ49;E9PI39;E9PPR1;E9PL12;E9PL71;E9PQZ1;P29692-4;E9PMW7	Elongation factor 1-delta	EEF1D	tr|E9PK01|E9PK01_HUMAN Elongation factor 1-delta (Fragment) OS=Homo sapiens GN=EEF1D PE=1 SV=1;sp|P29692|EF1D_HUMAN Elongation factor 1-delta OS=Homo sapiens GN=EEF1D PE=1 SV=5;tr|A0A087X1X7|A0A087X1X7_HUMAN Elongation factor 1-delta OS=Homo sapiens GN=EEF	1565200000	1341600000	145340000	78262000	67080000	1466100000	1261700000	9	9	8	43.3	43.3	40.6	28.821	0	207.44	2906800000	81	43.3	39.8	41	40	25	9	8	9	8	8	7
565	E9PK09;E9PQN2;E9PKI6;E9PK91;Q9NYF8-3;Q9NYF8-2;Q9NYF8;Q9NYF8-4;E9PJA7;H0YF00	E9PK09;E9PQN2;E9PKI6;E9PK91;Q9NYF8-3;Q9NYF8-2;Q9NYF8;Q9NYF8-4;E9PJA7	Bcl-2-associated transcription factor 1	BCLAF1	tr|E9PK09|E9PK09_HUMAN Bcl-2-associated transcription factor 1 (Fragment) OS=Homo sapiens GN=BCLAF1 PE=1 SV=3;tr|E9PQN2|E9PQN2_HUMAN Bcl-2-associated transcription factor 1 OS=Homo sapiens GN=BCLAF1 PE=1 SV=1;tr|E9PKI6|E9PKI6_HUMAN Bcl-2-associated transcr	2173200000	1926700000	102500000	54330000	48167000	1666700000	2220600000	16	16	16	27.3	27.3	27.3	83.231	0	77.912	4099900000	88	22	23.3	45	43	10	14	13	14	13	14	13
566	E9PK21;Q9UNP9-2;Q9UNP9;Q9UNP9-3	E9PK21;Q9UNP9-2;Q9UNP9;Q9UNP9-3	Peptidyl-prolyl cis-trans isomerase E	PPIE	tr|E9PK21|E9PK21_HUMAN Peptidyl-prolyl cis-trans isomerase E OS=Homo sapiens GN=PPIE PE=1 SV=1;sp|Q9UNP9-2|PPIE_HUMAN Isoform B of Peptidyl-prolyl cis-trans isomerase E OS=Homo sapiens GN=PPIE;sp|Q9UNP9|PPIE_HUMAN Peptidyl-prolyl cis-trans isomerase E OS=H	29512000	27054000	4713900	2459300	2254500	34264000	28870000	1	1	1	12	12	12	22.788	0	8.9537	56567000	6	12	12	2	4	4	1	1	1	1	1	1
567	E9PK47;P06737-2;P06737	E9PK47;P06737-2;P06737	Alpha-1,4 glucan phosphorylase;Glycogen phosphorylase, liver form	PYGL	tr|E9PK47|E9PK47_HUMAN Alpha-1,4 glucan phosphorylase OS=Homo sapiens GN=PYGL PE=1 SV=1;sp|P06737-2|PYGL_HUMAN Isoform 2 of Glycogen phosphorylase, liver form OS=Homo sapiens GN=PYGL;sp|P06737|PYGL_HUMAN Glycogen phosphorylase, liver form OS=Homo sapiens G	208180000	57246000	5104300	4003400	1100900	128940000	102260000	10	10	7	16	16	11.5	94.069	0	39.105	265420000	18	14	5.1	14	4	3	9	3	9	3	6	2
568	E9PS17;E9PK59;Q96KG9-5;Q96KG9-3;Q96KG9-4;Q96KG9-6;Q96KG9-2;Q96KG9;E9PPN3;H0YCI6	E9PS17;E9PK59;Q96KG9-5;Q96KG9-3;Q96KG9-4;Q96KG9-6;Q96KG9-2;Q96KG9;E9PPN3	N-terminal kinase-like protein	SCYL1	tr|E9PS17|E9PS17_HUMAN N-terminal kinase-like protein OS=Homo sapiens GN=SCYL1 PE=1 SV=1;tr|E9PK59|E9PK59_HUMAN N-terminal kinase-like protein OS=Homo sapiens GN=SCYL1 PE=1 SV=1;sp|Q96KG9-5|NTKL_HUMAN Isoform 5 of N-terminal kinase-like protein OS=Homo sap	175260000	79225000	6206900	4274600	1932300	167750000	94401000	7	7	7	13.4	13.4	13.4	85.718	0	16.964	254480000	14	11.6	11.7	8	6	10	5	6	5	6	5	6
569	H7BXH2;E9PKF6;Q5H9R7-6;Q5H9R7-2;Q5H9R7;Q5H9R7-5;Q5H9R7-3;Q5H9R7-4;H0YDW1;H0YEN2;E9PQP7	H7BXH2;E9PKF6;Q5H9R7-6;Q5H9R7-2;Q5H9R7;Q5H9R7-5;Q5H9R7-3;Q5H9R7-4	Serine/threonine-protein phosphatase 6 regulatory subunit 3	PPP6R3	tr|H7BXH2|H7BXH2_HUMAN Serine/threonine-protein phosphatase 6 regulatory subunit 3 OS=Homo sapiens GN=PPP6R3 PE=1 SV=1;tr|E9PKF6|E9PKF6_HUMAN Serine/threonine-protein phosphatase 6 regulatory subunit 3 OS=Homo sapiens GN=PPP6R3 PE=1 SV=1;sp|Q5H9R7-6|PP6R3_	12633000	15461000	610740	274620	336120	0	20696000	3	3	3	4.8	4.8	4.8	92.407	0.00032321	7.1498	28094000	3	1.7	3.1	2	1	11	1	2	1	2	1	2
570	E9PKG1;H7C2I1;Q99873-3;Q99873-2;Q99873-4;Q99873;E9PIX6;A0A087X1W2;E9PQ98;H0YDE4;E9PNR9;E9PMW9;E9PI83	E9PKG1;H7C2I1;Q99873-3;Q99873-2;Q99873-4;Q99873;E9PIX6;A0A087X1W2;E9PQ98;H0YDE4;E9PNR9	Protein arginine N-methyltransferase 1	PRMT1	tr|E9PKG1|E9PKG1_HUMAN Protein arginine N-methyltransferase 1 OS=Homo sapiens GN=PRMT1 PE=1 SV=1;tr|H7C2I1|H7C2I1_HUMAN Protein arginine N-methyltransferase 1 OS=Homo sapiens GN=PRMT1 PE=1 SV=1;sp|Q99873-3|ANM1_HUMAN Isoform 3 of Protein arginine N-methylt	214910000	118150000	16653000	10745000	5907700	172700000	155930000	10	10	10	38.2	38.2	38.2	37.709	0	35.526	333060000	22	38.2	24.3	15	7	13	10	7	10	7	10	7
571	E9PKP7;P17480-2;P17480;E9PLT2;E9PMM2;H0YDH7	E9PKP7;P17480-2;P17480	Nucleolar transcription factor 1	UBTF	tr|E9PKP7|E9PKP7_HUMAN Nucleolar transcription factor 1 OS=Homo sapiens GN=UBTF PE=1 SV=1;sp|P17480-2|UBF1_HUMAN Isoform UBF2 of Nucleolar transcription factor 1 OS=Homo sapiens GN=UBTF;sp|P17480|UBF1_HUMAN Nucleolar transcription factor 1 OS=Homo sapiens	1183700000	1167800000	47990000	24157000	23833000	1273500000	1146400000	20	20	20	28.7	28.7	28.7	87.435	0	302.27	2351500000	91	24.6	24.8	45	46	6	17	17	17	17	17	17
572	E9PKT4;Q8N131-2;Q8N131	E9PKT4;Q8N131-2;Q8N131	Porimin	TMEM123	tr|E9PKT4|E9PKT4_HUMAN Porimin OS=Homo sapiens GN=TMEM123 PE=4 SV=1;sp|Q8N131-2|PORIM_HUMAN Isoform 2 of Porimin OS=Homo sapiens GN=TMEM123;sp|Q8N131|PORIM_HUMAN Porimin OS=Homo sapiens GN=TMEM123 PE=1 SV=1	195960000	192780000	129580000	65319000	64259000	179250000	201650000	1	1	1	7.5	7.5	7.5	12.737	0.0010291	2.9396	388730000	8	7.5	7.5	5	3	3	1	1	1	1	1	1
573	F8VSA6;E9PS38;S4R3E9;E9PL57;Q15843	F8VSA6;E9PS38;S4R3E9;E9PL57;Q15843	NEDD8	NEDD8;NEDD8-MDP1	tr|F8VSA6|F8VSA6_HUMAN NEDD8 OS=Homo sapiens GN=NEDD8 PE=4 SV=1;tr|E9PS38|E9PS38_HUMAN Protein NEDD8-MDP1 OS=Homo sapiens GN=NEDD8-MDP1 PE=4 SV=2;tr|S4R3E9|S4R3E9_HUMAN Protein NEDD8-MDP1 OS=Homo sapiens GN=NEDD8-MDP1 PE=4 SV=1;tr|E9PL57|E9PL57_HUMAN Prote	111920000	103250000	71722000	37306000	34417000	112240000	98730000	1	1	1	28	28	28	5.8668	0	21.958	215170000	4	28	28	1	3	5	1	1	1	1	1	1
574	E9PLD3;E9PRG8	E9PLD3;E9PRG8	Uncharacterized protein C11orf98	C11orf98	tr|E9PLD3|E9PLD3_HUMAN Uncharacterized protein OS=Homo sapiens PE=4 SV=1;tr|E9PRG8|E9PRG8_HUMAN Protein LOC102288414 OS=Homo sapiens GN=LOC102288414 PE=4 SV=1	104410000	91969000	39276000	20882000	18394000	166440000	100190000	1	1	1	13.1	13.1	13.1	11.6	0.00055112	3.7756	196380000	2	13.1	13.1	1	1	2	1	1	1	1	1	1
575	E9PLK3;P55786;P55786-2;A6NEC2;H0YDG0;E9PP11;H0YCQ5;A6NEC2-2;E9PJF9;E9PJY4;E9PPD4;E9PPZ2	E9PLK3;P55786;P55786-2	Puromycin-sensitive aminopeptidase	NPEPPS	tr|E9PLK3|E9PLK3_HUMAN Puromycin-sensitive aminopeptidase OS=Homo sapiens GN=NPEPPS PE=1 SV=1;sp|P55786|PSA_HUMAN Puromycin-sensitive aminopeptidase OS=Homo sapiens GN=NPEPPS PE=1 SV=2;sp|P55786-2|PSA_HUMAN Isoform 2 of Puromycin-sensitive aminopeptidase O	468910000	272890000	13246000	8373400	4873100	406630000	324810000	19	19	19	28.6	28.6	28.6	102.99	0	48.571	741800000	29	24.7	14.5	17	12	12	16	10	16	10	16	10
576	E9PLL6;P46776;E9PJD9;E9PLX7	E9PLL6;P46776;E9PJD9	60S ribosomal protein L27a	RPL27A	tr|E9PLL6|E9PLL6_HUMAN 60S ribosomal protein L27a OS=Homo sapiens GN=RPL27A PE=1 SV=1;sp|P46776|RL27A_HUMAN 60S ribosomal protein L27a OS=Homo sapiens GN=RPL27A PE=1 SV=2;tr|E9PJD9|E9PJD9_HUMAN 60S ribosomal protein L27a OS=Homo sapiens GN=RPL27A PE=1 SV=1	2641600000	2486200000	854650000	440270000	414370000	2663600000	2937000000	7	7	7	43.5	43.5	43.5	12.201	0	81.365	5127900000	69	38.9	43.5	30	39	4	6	6	6	6	6	6
577	E9PLM9;E9PR04;E9PQR7;E9PM90;Q9UK41;Q9UK41-2	E9PLM9;E9PR04;E9PQR7;E9PM90;Q9UK41;Q9UK41-2	Vacuolar protein sorting-associated protein 28 homolog	VPS28	tr|E9PLM9|E9PLM9_HUMAN Vacuolar protein sorting-associated protein 28 homolog OS=Homo sapiens GN=VPS28 PE=4 SV=1;tr|E9PR04|E9PR04_HUMAN Vacuolar protein sorting-associated protein 28 homolog (Fragment) OS=Homo sapiens GN=VPS28 PE=1 SV=1;tr|E9PQR7|E9PQR7_HU	17242000	11366000	14304000	8621000	5683000	16935000	18267000	1	1	1	71.4	71.4	71.4	3.9415	0.00030488	5.6444	28608000	2	71.4	71.4	1	1	6	1	1	1	1	1	1
578	I3L3B4;F8W9H0;E9PLN8;Q9BQB6-3;Q9BQB6-2;Q9BQB6	I3L3B4;F8W9H0;E9PLN8;Q9BQB6-3;Q9BQB6-2;Q9BQB6	Vitamin K epoxide reductase complex subunit 1	VKORC1	tr|I3L3B4|I3L3B4_HUMAN Uncharacterized protein (Fragment) OS=Homo sapiens PE=4 SV=1;tr|F8W9H0|F8W9H0_HUMAN Vitamin K epoxide reductase complex subunit 1 OS=Homo sapiens GN=VKORC1 PE=4 SV=1;tr|E9PLN8|E9PLN8_HUMAN Uncharacterized protein (Fragment) OS=Homo s	677660000	586980000	210770000	112940000	97830000	650560000	601220000	2	2	2	23.1	23.1	23.1	11.082	0	46.752	1264600000	19	23.1	23.1	7	12	6	2	2	2	2	2	2
579	E9PM69;R4GNH3;P17980;E9PMD8;E9PKD5;E9PN50;E9PLG2	E9PM69;R4GNH3;P17980;E9PMD8;E9PKD5;E9PN50	26S protease regulatory subunit 6A	PSMC3	tr|E9PM69|E9PM69_HUMAN 26S protease regulatory subunit 6A OS=Homo sapiens GN=PSMC3 PE=1 SV=1;tr|R4GNH3|R4GNH3_HUMAN 26S protease regulatory subunit 6A OS=Homo sapiens GN=PSMC3 PE=1 SV=1;sp|P17980|PRS6A_HUMAN 26S protease regulatory subunit 6A OS=Homo sapie	381030000	185000000	20964000	14112000	6851900	341660000	252170000	9	9	9	34.5	34.5	34.5	44.323	0	62.825	566040000	42	34.5	31	22	20	7	9	8	9	8	9	8
580	E9PMR4;P48509;E9PRJ3;E9PP93;E9PK37;E9PJE8;E9PSA1;E9PJC8;E9PLZ6;K4DIB7	E9PMR4;P48509;E9PRJ3	Tetraspanin;CD151 antigen	CD151	tr|E9PMR4|E9PMR4_HUMAN Tetraspanin OS=Homo sapiens GN=CD151 PE=1 SV=1;sp|P48509|CD151_HUMAN CD151 antigen OS=Homo sapiens GN=CD151 PE=1 SV=3;tr|E9PRJ3|E9PRJ3_HUMAN Tetraspanin (Fragment) OS=Homo sapiens GN=CD151 PE=1 SV=1	464960000	211020000	61453000	42269000	19184000	314690000	291860000	3	3	3	11.6	11.6	11.6	28.067	0	53.968	675980000	18	11.6	11.6	11	7	10	3	3	3	3	3	3
581	E9PMS6;H0YDG6;H0YDQ3;E9PJ10;E9PLU6;E9PK58;H0YE95;U3KQE6;E9PRE3;E9PRJ0	E9PMS6		LMO7	tr|E9PMS6|E9PMS6_HUMAN LIM domain only protein 7 OS=Homo sapiens GN=LMO7 PE=1 SV=1	12304000	0	143070	143070	0	10233000	0	33	1	1	38.5	0.7	0.7	145.42	1	-2	12304000	1	36	27.6	1	0	10	30	24	1	0	1	0
582	E9PN17;O75964	E9PN17;O75964	ATP synthase subunit g, mitochondrial	ATP5L	tr|E9PN17|E9PN17_HUMAN ATP synthase subunit g, mitochondrial OS=Homo sapiens GN=ATP5L PE=1 SV=1;sp|O75964|ATP5L_HUMAN ATP synthase subunit g, mitochondrial OS=Homo sapiens GN=ATP5L PE=1 SV=3	4881700000	3604600000	1414400000	813620000	600770000	4497100000	4140000000	6	6	6	64.5	64.5	64.5	8.4518	0	312.96	8486400000	134	64.5	64.5	59	75	2	6	6	6	6	6	6
583	E9PNM1;P37268;P37268-2;P37268-4;P37268-3;P37268-5;E9PJG4;E9PS69;E9PQ90;E9PNJ2;E9PSH1	E9PNM1;P37268;P37268-2;P37268-4;P37268-3;P37268-5	Squalene synthase	FDFT1	tr|E9PNM1|E9PNM1_HUMAN Squalene synthase OS=Homo sapiens GN=FDFT1 PE=1 SV=1;sp|P37268|FDFT_HUMAN Squalene synthase OS=Homo sapiens GN=FDFT1 PE=1 SV=1;sp|P37268-2|FDFT_HUMAN Isoform 2 of Squalene synthase OS=Homo sapiens GN=FDFT1;sp|P37268-4|FDFT_HUMAN Isof	850220000	656270000	65500000	36966000	28533000	771390000	772140000	14	14	14	42.4	42.4	42.4	47.285	0	126.01	1506500000	65	38.3	34.6	34	31	11	13	11	13	11	13	11
584	E9PNW4;E9PR17;P13987;H0YET2	E9PNW4;E9PR17;P13987;H0YET2	CD59 glycoprotein	CD59	tr|E9PNW4|E9PNW4_HUMAN CD59 glycoprotein OS=Homo sapiens GN=CD59 PE=1 SV=1;tr|E9PR17|E9PR17_HUMAN CD59 glycoprotein OS=Homo sapiens GN=CD59 PE=1 SV=1;sp|P13987|CD59_HUMAN CD59 glycoprotein OS=Homo sapiens GN=CD59 PE=1 SV=1;tr|H0YET2|H0YET2_HUMAN CD59 glyco	1705800000	1481400000	637430000	341150000	296270000	1025700000	1863800000	4	4	4	29.6	29.6	29.6	11.985	0	87.854	3187100000	46	29.6	29.6	18	28	4	4	3	4	3	4	3
585	E9PP16;Q8ND30-3;Q8ND30-2;Q8ND30;H0YFE4;F5GZP6;Q86W92-3;Q86W92-4;Q86W92-2;Q86W92	E9PP16;Q8ND30-3;Q8ND30-2;Q8ND30;H0YFE4;F5GZP6;Q86W92-3;Q86W92-4;Q86W92-2;Q86W92	Liprin-beta-2;Liprin-beta-1	PPFIBP2;PPFIBP1	tr|E9PP16|E9PP16_HUMAN Liprin-beta-2 OS=Homo sapiens GN=PPFIBP2 PE=1 SV=1;sp|Q8ND30-3|LIPB2_HUMAN Isoform 3 of Liprin-beta-2 OS=Homo sapiens GN=PPFIBP2;sp|Q8ND30-2|LIPB2_HUMAN Isoform 2 of Liprin-beta-2 OS=Homo sapiens GN=PPFIBP2;sp|Q8ND30|LIPB2_HUMAN Lipr	0	2166200	42474	0	42474	0	2493000	2	2	2	3.2	3.2	3.2	81.379	0.00054157	3.5489	2166200	3	1.7	1.5	2	1	10	1	1	1	1	1	1
586	E9PPJ0;Q13435;A0A087WZZ5;E9PJT3;E9PJ04;H0YCG1;H0YEX5;E9PIL8	E9PPJ0;Q13435;A0A087WZZ5	Splicing factor 3B subunit 2	SF3B2	tr|E9PPJ0|E9PPJ0_HUMAN Splicing factor 3B subunit 2 OS=Homo sapiens GN=SF3B2 PE=1 SV=1;sp|Q13435|SF3B2_HUMAN Splicing factor 3B subunit 2 OS=Homo sapiens GN=SF3B2 PE=1 SV=2;tr|A0A087WZZ5|A0A087WZZ5_HUMAN Splicing factor 3B subunit 2 OS=Homo sapiens GN=SF3B	2883500000	2724700000	105820000	54407000	51410000	2957900000	3015600000	27	27	27	39	39	39	98.169	0	294.23	5608300000	148	36.6	30.4	71	77	8	25	23	25	23	25	23
587	E9PPW7;O00217;E9PKH6;E9PN51;F8W9K7	E9PPW7;O00217;E9PKH6;E9PN51;F8W9K7	NADH dehydrogenase [ubiquinone] iron-sulfur protein 8, mitochondrial	NDUFS8	tr|E9PPW7|E9PPW7_HUMAN NADH dehydrogenase [ubiquinone] iron-sulfur protein 8, mitochondrial (Fragment) OS=Homo sapiens GN=NDUFS8 PE=1 SV=1;sp|O00217|NDUS8_HUMAN NADH dehydrogenase [ubiquinone] iron-sulfur protein 8, mitochondrial OS=Homo sapiens GN=NDUFS8	1247600000	736370000	152610000	95968000	56644000	959840000	699630000	6	6	6	37	37	37	20.656	0	90.597	1984000000	65	37	27.2	30	35	5	6	4	6	4	6	4
588	E9PPX5;Q96A22	E9PPX5;Q96A22	Uncharacterized protein C11orf52	C11orf52	tr|E9PPX5|E9PPX5_HUMAN Uncharacterized protein C11orf52 (Fragment) OS=Homo sapiens GN=C11orf52 PE=4 SV=1;sp|Q96A22|CK052_HUMAN Uncharacterized protein C11orf52 OS=Homo sapiens GN=C11orf52 PE=2 SV=2	0	0	0	0	0	0	0	1	1	1	34.1	34.1	34.1	4.9627	0.0067098	2.1539	0	1	34.1	0	1	0	2	1	0	1	0	1	0
589	H7BYV1;E9PS44;E9PQN9;P13164;Q01629;Q01628	H7BYV1;E9PS44;E9PQN9;P13164;Q01629;Q01628	Interferon-induced transmembrane protein 1;Interferon-induced transmembrane protein 2;Interferon-induced transmembrane protein 3	IFITM2;IFITM3;IFITM1	tr|H7BYV1|H7BYV1_HUMAN Interferon-induced transmembrane protein 2 (Fragment) OS=Homo sapiens GN=IFITM2 PE=4 SV=1;tr|E9PS44|E9PS44_HUMAN Interferon-induced transmembrane protein 3 OS=Homo sapiens GN=IFITM3 PE=4 SV=1;tr|E9PQN9|E9PQN9_HUMAN Interferon-induced	183090000	147870000	330950000	183090000	147870000	190040000	138160000	1	1	1	21.6	21.6	21.6	8.0866	0	32.557	330950000	10	21.6	21.6	4	6	6	1	1	1	1	1	1
590	E9PQY2;Q9NQP4	E9PQY2;Q9NQP4	Prefoldin subunit 4	PFDN4	tr|E9PQY2|E9PQY2_HUMAN Prefoldin subunit 4 OS=Homo sapiens GN=PFDN4 PE=1 SV=1;sp|Q9NQP4|PFD4_HUMAN Prefoldin subunit 4 OS=Homo sapiens GN=PFDN4 PE=1 SV=1	18934000	0	2366700	2366700	0	12247000	0	1	1	1	8.8	8.8	8.8	15.598	0.002474	2.5569	18934000	5	8.8	8.8	4	1	2	1	1	1	1	1	1
591	E9PR30;P62861	E9PR30;P62861	40S ribosomal protein S30	FAU	tr|E9PR30|E9PR30_HUMAN 40S ribosomal protein S30 OS=Homo sapiens GN=FAU PE=1 SV=1;sp|P62861|RS30_HUMAN 40S ribosomal protein S30 OS=Homo sapiens GN=FAU PE=1 SV=1	393920000	408370000	133720000	65654000	68062000	352710000	363750000	2	2	2	11.2	11.2	11.2	10.905	0	8.6508	802300000	14	11.2	11.2	6	8	2	2	2	2	2	2	2
592	H0YDK8;E9PR38;H0YEH2;Q5T1Z4;Q5T1Z8;Q14671-4;Q14671-2;Q14671;Q14671-3;H0YC97;H0YDQ6;H0YDC5	H0YDK8;E9PR38;H0YEH2;Q5T1Z4;Q5T1Z8;Q14671-4;Q14671-2;Q14671;Q14671-3;H0YC97	Pumilio homolog 1	PUM1	tr|H0YDK8|H0YDK8_HUMAN Pumilio homolog 1 (Fragment) OS=Homo sapiens GN=PUM1 PE=1 SV=1;tr|E9PR38|E9PR38_HUMAN Pumilio homolog 1 OS=Homo sapiens GN=PUM1 PE=1 SV=1;tr|H0YEH2|H0YEH2_HUMAN Pumilio homolog 1 (Fragment) OS=Homo sapiens GN=PUM1 PE=1 SV=1;tr|Q5T1Z4	57731000	54903000	4022700	2061800	1960800	43458000	36050000	3	3	2	4.7	4.7	2.7	95.696	0	8.5895	112630000	12	4.7	3.6	8	4	12	3	2	3	2	2	1
593	E9PRU3;P30291-2;P30291	E9PRU3;P30291-2;P30291	Wee1-like protein kinase	WEE1	tr|E9PRU3|E9PRU3_HUMAN Wee1-like protein kinase (Fragment) OS=Homo sapiens GN=WEE1 PE=4 SV=1;sp|P30291-2|WEE1_HUMAN Isoform 2 of Wee1-like protein kinase OS=Homo sapiens GN=WEE1;sp|P30291|WEE1_HUMAN Wee1-like protein kinase OS=Homo sapiens GN=WEE1 PE=1 SV=	190320000	281810000	29508000	11895000	17613000	271010000	183730000	1	1	1	4.7	4.7	4.7	24.037	0.0085046	1.9879	472130000	9	4.7	4.7	4	5	3	1	1	1	1	1	1
594	E9PS00;Q9Y5Q0	E9PS00;Q9Y5Q0	Fatty acid desaturase 3	FADS3	tr|E9PS00|E9PS00_HUMAN Fatty acid desaturase 3 OS=Homo sapiens GN=FADS3 PE=4 SV=1;sp|Q9Y5Q0|FADS3_HUMAN Fatty acid desaturase 3 OS=Homo sapiens GN=FADS3 PE=2 SV=1	0	19878000	864280	0	864280	0	29675000	2	2	2	7	7	7	48.166	0.00055356	3.862	19878000	3	0	7	0	3	2	0	2	0	2	0	2
595	E9PSD3;O43427-2;O43427	E9PSD3;O43427-2;O43427	Acidic fibroblast growth factor intracellular-binding protein	FIBP	tr|E9PSD3|E9PSD3_HUMAN Acidic fibroblast growth factor intracellular-binding protein OS=Homo sapiens GN=FIBP PE=1 SV=1;sp|O43427-2|FIBP_HUMAN Isoform Short of Acidic fibroblast growth factor intracellular-binding protein OS=Homo sapiens GN=FIBP;sp|O43427|F	16500000	0	660010	660010	0	23911000	0	1	1	1	4.6	4.6	4.6	39.313	0.0012598	2.7431	16500000	1	4.6	0	1	0	3	1	0	1	0	1	0
596	E9PSI0;Q9NPQ8-2;Q9NPQ8-4;Q9NPQ8;Q9NPQ8-3	E9PSI0;Q9NPQ8-2;Q9NPQ8-4;Q9NPQ8;Q9NPQ8-3	Synembryn-A	RIC8A	tr|E9PSI0|E9PSI0_HUMAN Synembryn-A (Fragment) OS=Homo sapiens GN=RIC8A PE=1 SV=1;sp|Q9NPQ8-2|RIC8A_HUMAN Isoform 2 of Synembryn-A OS=Homo sapiens GN=RIC8A;sp|Q9NPQ8-4|RIC8A_HUMAN Isoform 4 of Synembryn-A OS=Homo sapiens GN=RIC8A;sp|Q9NPQ8|RIC8A_HUMAN Synem	7469000	0	933620	933620	0	4742000	0	1	1	1	9.8	9.8	9.8	20.742	0.0039245	2.4248	7469000	2	9.8	0	2	0	5	1	0	1	0	1	0
597	E9PSI1;E9PMQ9;O15321-2;O15321;E9PL78;E9PJM1;E9PQY7;E9PS99;G3V1B9;E9PJC4;E9PNW2;E9PQI5;E9PQ80	E9PSI1;E9PMQ9;O15321-2;O15321;E9PL78;E9PJM1;E9PQY7;E9PS99;G3V1B9;E9PJC4	Transmembrane 9 superfamily member 1	TM9SF1	tr|E9PSI1|E9PSI1_HUMAN Transmembrane 9 superfamily member 1 OS=Homo sapiens GN=TM9SF1 PE=4 SV=1;tr|E9PMQ9|E9PMQ9_HUMAN Transmembrane 9 superfamily member 1 OS=Homo sapiens GN=TM9SF1 PE=4 SV=1;sp|O15321-2|TM9S1_HUMAN Isoform 2 of Transmembrane 9 superfamily	1170200000	1547600000	75492000	32505000	42988000	1282700000	1494900000	13	13	11	21	21	18.4	92.386	0	167.73	2717700000	73	18.4	18.9	31	42	13	11	11	11	11	11	9
598	F1DAL9;P24468-3;P24468-2;P24468;P10589	F1DAL9;P24468-3;P24468-2;P24468;P10589	COUP transcription factor 2;COUP transcription factor 1	NR2F1;NR2F2	tr|F1DAL9|F1DAL9_HUMAN COUP transcription factor 1 OS=Homo sapiens GN=NR2F1 PE=2 SV=1;sp|P24468-3|COT2_HUMAN Isoform 3 of COUP transcription factor 2 OS=Homo sapiens GN=NR2F2;sp|P24468-2|COT2_HUMAN Isoform 2 of COUP transcription factor 2 OS=Homo sapiens G	13344000	4577200	943250	702340	240900	5511200	0	3	3	2	7.8	7.8	5.8	43.898	0.00055188	3.7861	17922000	2	3.5	4.3	0	2	5	1	2	1	2	1	1
599	F1DAM0;Q13285;Q5T6F7;Q5T6F6;H0Y328;O00482-3;O00482-4;O00482-2;O00482	F1DAM0;Q13285;Q5T6F7	Steroidogenic factor 1	NR5A1	tr|F1DAM0|F1DAM0_HUMAN Steroidogenic factor 1 OS=Homo sapiens GN=NR5A1 PE=2 SV=1;sp|Q13285|STF1_HUMAN Steroidogenic factor 1 OS=Homo sapiens GN=NR5A1 PE=1 SV=2;tr|Q5T6F7|Q5T6F7_HUMAN Steroidogenic factor 1 (Fragment) OS=Homo sapiens GN=NR5A1 PE=4 SV=1	72031000	13885000	4295800	3601500	694240	52179000	24532000	3	3	3	10.5	10.5	10.5	47.053	0	9.935	85915000	8	10.5	3.3	6	2	9	3	1	3	1	3	1
600	F1T0J2;Q14789;Q14789-2;E7EU81;H0Y867;H7C5I7	F1T0J2;Q14789;Q14789-2;E7EU81	Golgin subfamily B member 1	GOLGB1	tr|F1T0J2|F1T0J2_HUMAN Golgin subfamily B member 1 OS=Homo sapiens GN=GOLGB1 PE=1 SV=1;sp|Q14789|GOGB1_HUMAN Golgin subfamily B member 1 OS=Homo sapiens GN=GOLGB1 PE=1 SV=2;sp|Q14789-2|GOGB1_HUMAN Isoform 2 of Golgin subfamily B member 1 OS=Homo sapiens GN	883730000	542070000	6308900	3910300	2398600	683140000	703950000	47	47	46	22.8	22.8	22.6	367.42	0	279.93	1425800000	85	19.3	12.6	51	34	6	39	25	39	25	38	25
601	F2Z2B9;Q9BSJ2-3;Q9BSJ2;Q9BSJ2-4;B3KTU7	F2Z2B9;Q9BSJ2-3;Q9BSJ2;Q9BSJ2-4;B3KTU7	Gamma-tubulin complex component 2	TUBGCP2	tr|F2Z2B9|F2Z2B9_HUMAN Gamma-tubulin complex component 2 OS=Homo sapiens GN=TUBGCP2 PE=1 SV=1;sp|Q9BSJ2-3|GCP2_HUMAN Isoform 2 of Gamma-tubulin complex component 2 OS=Homo sapiens GN=TUBGCP2;sp|Q9BSJ2|GCP2_HUMAN Gamma-tubulin complex component 2 OS=Homo sa	24484000	0	520940	520940	0	24048000	0	2	2	2	3.9	3.9	3.9	82.603	0.00057687	4.5121	24484000	3	3.9	0	3	0	5	2	0	2	0	2	0
602	H0Y4W2;F2Z2U4;Q9Y4A5-2;Q9Y4A5	H0Y4W2;F2Z2U4;Q9Y4A5-2;Q9Y4A5	Transformation/transcription domain-associated protein	TRRAP	tr|H0Y4W2|H0Y4W2_HUMAN Transformation/transcription domain-associated protein (Fragment) OS=Homo sapiens GN=TRRAP PE=1 SV=1;tr|F2Z2U4|F2Z2U4_HUMAN Transformation/transcription domain-associated protein OS=Homo sapiens GN=TRRAP PE=1 SV=3;sp|Q9Y4A5-2|TRRAP_H	11034000	22535000	149860	49260	100600	0	34097000	7	6	6	2.5	2.4	2.4	405.8	0	7.8424	33570000	7	0.8	2.2	2	5	4	3	6	2	5	2	5
603	F2Z2X4;Q9C0E2	F2Z2X4;Q9C0E2	Exportin-4	XPO4	tr|F2Z2X4|F2Z2X4_HUMAN Exportin-4 OS=Homo sapiens GN=XPO4 PE=1 SV=1;sp|Q9C0E2|XPO4_HUMAN Exportin-4 OS=Homo sapiens GN=XPO4 PE=1 SV=2	25131000	0	418860	418860	0	20902000	0	2	2	2	1.9	1.9	1.9	130.15	0.000803	3.3911	25131000	3	1.9	0	3	0	2	2	0	2	0	2	0
604	F2Z393;P37837	F2Z393;P37837	Transaldolase	TALDO1	tr|F2Z393|F2Z393_HUMAN Transaldolase OS=Homo sapiens GN=TALDO1 PE=1 SV=1;sp|P37837|TALDO_HUMAN Transaldolase OS=Homo sapiens GN=TALDO1 PE=1 SV=2	299670000	414890000	35728000	14984000	20745000	440010000	377560000	7	7	7	23	23	23	35.328	0	23.151	714560000	23	13.2	23	5	18	2	4	7	4	7	4	7
605	F2Z3A6;F8W8C2;Q9HBM0-2;Q9HBM0	F2Z3A6;F8W8C2;Q9HBM0-2;Q9HBM0	Vezatin	VEZT	tr|F2Z3A6|F2Z3A6_HUMAN Vezatin OS=Homo sapiens GN=VEZT PE=4 SV=2;tr|F8W8C2|F8W8C2_HUMAN Vezatin (Fragment) OS=Homo sapiens GN=VEZT PE=4 SV=1;sp|Q9HBM0-2|VEZA_HUMAN Isoform 2 of Vezatin OS=Homo sapiens GN=VEZT;sp|Q9HBM0|VEZA_HUMAN Vezatin OS=Homo sapiens GN	55442000	30072000	2850500	1848100	1002400	46841000	37865000	6	6	6	19.8	19.8	19.8	52.863	0	9.0719	85515000	3	16.3	6.3	2	1	4	5	2	5	2	5	2
606	F2Z3N8;Q92613;F2Z2B6	F2Z3N8;Q92613;F2Z2B6	Protein Jade-3	JADE3	tr|F2Z3N8|F2Z3N8_HUMAN Protein Jade-3 (Fragment) OS=Homo sapiens GN=JADE3 PE=1 SV=1;sp|Q92613|JADE3_HUMAN Protein Jade-3 OS=Homo sapiens GN=JADE3 PE=1 SV=1;tr|F2Z2B6|F2Z2B6_HUMAN Protein Jade-3 (Fragment) OS=Homo sapiens GN=JADE3 PE=1 SV=1	0	10595000	1059500	0	1059500	0	13603000	2	2	2	23.1	23.1	23.1	21.367	0.00079093	3.2352	10595000	1	14	9.1	1	0	3	1	1	1	1	1	1
607	F5GWH5;P61165	F5GWH5;P61165	Transmembrane protein 258	TMEM258	tr|F5GWH5|F5GWH5_HUMAN Transmembrane protein 258 OS=Homo sapiens GN=TMEM258 PE=1 SV=1;sp|P61165|TM258_HUMAN Transmembrane protein 258 OS=Homo sapiens GN=TMEM258 PE=1 SV=1	208190000	155420000	363610000	208190000	155420000	116010000	177450000	1	1	1	16.3	16.3	16.3	5.7065	0	15.632	363610000	15	16.3	16.3	12	3	2	1	1	1	1	1	1
608	F5GWX2;Q9NRV9	F5GWX2;Q9NRV9	Heme-binding protein 1	HEBP1	tr|F5GWX2|F5GWX2_HUMAN Heme-binding protein 1 OS=Homo sapiens GN=HEBP1 PE=1 SV=1;sp|Q9NRV9|HEBP1_HUMAN Heme-binding protein 1 OS=Homo sapiens GN=HEBP1 PE=1 SV=1	66727000	0	6672700	6672700	0	42365000	0	2	2	2	24.8	24.8	24.8	14.72	0.00056577	4.1822	66727000	2	24.8	0	2	0	2	2	0	2	0	2	0
609	F5GWX5;Q14839;Q14839-2;Q8TDI0;K7EMY3;F2Z2R5;K7EPV1;K7ESA5;I3L229;H7C3H7;F5H6N4;H7C0J3	F5GWX5;Q14839;Q14839-2	Chromodomain-helicase-DNA-binding protein 4	CHD4	tr|F5GWX5|F5GWX5_HUMAN Chromodomain-helicase-DNA-binding protein 4 OS=Homo sapiens GN=CHD4 PE=1 SV=1;sp|Q14839|CHD4_HUMAN Chromodomain-helicase-DNA-binding protein 4 OS=Homo sapiens GN=CHD4 PE=1 SV=2;sp|Q14839-2|CHD4_HUMAN Isoform 2 of Chromodomain-helicas	453360000	475090000	9102400	4444700	4657700	480680000	515060000	19	19	12	13.5	13.5	9.1	217.1	0	58.776	928440000	37	10.1	7	18	19	12	14	10	14	10	9	6
610	F5GX77;Q9UI30;F5GYQ2;Q9UI30-2	F5GX77;Q9UI30;F5GYQ2;Q9UI30-2	Multifunctional methyltransferase subunit TRM112-like protein	TRMT112	tr|F5GX77|F5GX77_HUMAN Multifunctional methyltransferase subunit TRM112-like protein OS=Homo sapiens GN=TRMT112 PE=1 SV=1;sp|Q9UI30|TR112_HUMAN Multifunctional methyltransferase subunit TRM112-like protein OS=Homo sapiens GN=TRMT112 PE=1 SV=1;tr|F5GYQ2|F5G	122250000	95464000	24190000	13583000	10607000	136810000	82343000	3	3	3	38.7	38.7	38.7	11.972	0	22.699	217710000	12	26.4	38.7	4	8	4	2	3	2	3	2	3
611	F5GXC5;Q8TB96	F5GXC5;Q8TB96	T-cell immunomodulatory protein	ITFG1	tr|F5GXC5|F5GXC5_HUMAN T-cell immunomodulatory protein OS=Homo sapiens GN=ITFG1 PE=4 SV=1;sp|Q8TB96|TIP_HUMAN T-cell immunomodulatory protein OS=Homo sapiens GN=ITFG1 PE=1 SV=1	28584000	24502000	3539000	1905600	1633400	46578000	30824000	1	1	1	2.6	2.6	2.6	52.106	0.00078493	3.1489	53085000	1	2.6	2.6	1	0	2	1	1	1	1	1	1
612	F5GXK8	F5GXK8		DNAJB11	tr|F5GXK8|F5GXK8_HUMAN DnaJ homolog subfamily B member 11 OS=Homo sapiens GN=DNAJB11 PE=4 SV=1	0	0	0	0	0	0	0	1	1	1	13.3	13.3	13.3	9.3978	0.00056593	4.1945	0	2	13.3	0	2	0	1	1	0	1	0	1	0
613	F5GXQ6;Q6NZY4-2;Q6NZY4;F5H803;F5H6J5;F5GX80	F5GXQ6;Q6NZY4-2;Q6NZY4;F5H803;F5H6J5;F5GX80	Zinc finger CCHC domain-containing protein 8	ZCCHC8	tr|F5GXQ6|F5GXQ6_HUMAN Zinc finger CCHC domain-containing protein 8 OS=Homo sapiens GN=ZCCHC8 PE=1 SV=1;sp|Q6NZY4-2|ZCHC8_HUMAN Isoform 2 of Zinc finger CCHC domain-containing protein 8 OS=Homo sapiens GN=ZCCHC8;sp|Q6NZY4|ZCHC8_HUMAN Zinc finger CCHC domai	0	26427000	2402500	0	2402500	0	29533000	2	2	2	9.4	9.4	9.4	33.967	0	10.746	26427000	4	5.3	9.4	1	3	6	1	2	1	2	1	2
614	F5GXS0;P0C0L5;CON__ENSEMBL:ENSBTAP00000007350;CON__P01030	F5GXS0;P0C0L5	Complement C4-B;Complement C4 beta chain;Complement C4-B alpha chain;C4a anaphylatoxin;C4b-B;C4d-B;Complement C4 gamma chain	C4B	tr|F5GXS0|F5GXS0_HUMAN Complement C4-B OS=Homo sapiens GN=C4B PE=4 SV=1;sp|P0C0L5|CO4B_HUMAN Complement C4-B OS=Homo sapiens GN=C4B PE=1 SV=2	2404100000	1898100000	48888000	27319000	21569000	1913500000	2351800000	43	43	2	35.5	35.5	2.4	187.67	0	323.31	4302200000	183	33.7	29.6	95	88	4	41	35	41	35	1	1
615	I3L521;F5GXV8;J3KPD3;F5GY08;Q9Y580;F5H606;G3V1T9	I3L521;F5GXV8;J3KPD3;F5GY08;Q9Y580	RNA-binding protein 7	RBM7	tr|I3L521|I3L521_HUMAN Uncharacterized protein (Fragment) OS=Homo sapiens PE=4 SV=1;tr|F5GXV8|F5GXV8_HUMAN RNA-binding protein 7 OS=Homo sapiens GN=RBM7 PE=4 SV=1;tr|J3KPD3|J3KPD3_HUMAN RNA binding motif protein 7, isoform CRA_c OS=Homo sapiens GN=RBM7 PE=	74004000	28673000	14668000	10572000	4096200	53599000	45476000	3	3	3	40.5	40.5	40.5	16.436	0.00031201	6.1708	102680000	7	40.5	12.2	3	4	7	3	1	3	1	3	1
616	F5GXW1;H0Y7H7;H0Y599;Q8N1I0-2;Q8N1I0;Q8N1I0-3	F5GXW1;H0Y7H7;H0Y599;Q8N1I0-2;Q8N1I0;Q8N1I0-3	Dedicator of cytokinesis protein 4	DOCK4	tr|F5GXW1|F5GXW1_HUMAN Dedicator of cytokinesis protein 4 OS=Homo sapiens GN=DOCK4 PE=4 SV=2;tr|H0Y7H7|H0Y7H7_HUMAN Dedicator of cytokinesis protein 4 (Fragment) OS=Homo sapiens GN=DOCK4 PE=1 SV=1;tr|H0Y599|H0Y599_HUMAN Dedicator of cytokinesis protein 4 (	15971000	7145700	339950	234870	105080	17867000	7079400	1	1	1	2.5	2.5	2.5	126.06	0.0010301	2.9515	23117000	3	2.5	2.5	1	2	6	1	1	1	1	1	1
617	F5GXW6;O95415	F5GXW6;O95415	Brain protein I3	BRI3	tr|F5GXW6|F5GXW6_HUMAN Brain protein I3 OS=Homo sapiens GN=BRI3 PE=4 SV=1;sp|O95415|BRI3_HUMAN Brain protein I3 OS=Homo sapiens GN=BRI3 PE=2 SV=1	0	0	0	0	0	0	0	1	1	1	16.3	16.3	16.3	10.863	0.00054098	3.5393	0	1	0	16.3	0	1	2	0	1	0	1	0	1
618	F5GXX5;P61803;F5H895	F5GXX5;P61803;F5H895	Dolichyl-diphosphooligosaccharide--protein glycosyltransferase subunit DAD1	DAD1	tr|F5GXX5|F5GXX5_HUMAN Dolichyl-diphosphooligosaccharide--protein glycosyltransferase subunit DAD1 OS=Homo sapiens GN=DAD1 PE=1 SV=1;sp|P61803|DAD1_HUMAN Dolichyl-diphosphooligosaccharide--protein glycosyltransferase subunit DAD1 OS=Homo sapiens GN=DAD1 PE	2210200000	2112800000	720510000	368370000	352140000	2447600000	1416700000	3	3	3	37.6	37.6	37.6	9.5541	0	47.311	4323100000	55	25.9	37.6	25	30	3	2	3	2	3	2	3
619	F5GYA2;P13051-2;P13051;Q68DM5	F5GYA2;P13051-2;P13051;Q68DM5	Uracil-DNA glycosylase	UNG;DKFZp781L1143	tr|F5GYA2|F5GYA2_HUMAN Uracil-DNA glycosylase OS=Homo sapiens GN=UNG PE=1 SV=1;sp|P13051-2|UNG_HUMAN Isoform 1 of Uracil-DNA glycosylase OS=Homo sapiens GN=UNG;sp|P13051|UNG_HUMAN Uracil-DNA glycosylase OS=Homo sapiens GN=UNG PE=1 SV=2;tr|Q68DM5|Q68DM5_HUM	78884000	0	5258900	5258900	0	61468000	0	3	3	3	27.1	27.1	27.1	28.538	0	7.7542	78884000	1	27.1	0	1	0	4	3	0	3	0	3	0
620	F5GYJ5;Q9NX18;F5H8E2;F8W679;M0QYN2;F5GXW4;M0R060;F5H5T6	F5GYJ5;Q9NX18	Succinate dehydrogenase assembly factor 2, mitochondrial	SDHAF2	tr|F5GYJ5|F5GYJ5_HUMAN Protein LOC102723830 OS=Homo sapiens GN=LOC102723830 PE=3 SV=1;sp|Q9NX18|SDHF2_HUMAN Succinate dehydrogenase assembly factor 2, mitochondrial OS=Homo sapiens GN=SDHAF2 PE=1 SV=1	48250000	41688000	7494800	4020800	3474000	45662000	44874000	4	4	4	27.3	27.3	27.3	18.388	0	11.031	89938000	12	27.3	17.5	7	5	8	3	2	3	2	3	2
621	F5GYN4;J3KR44;Q96FW1;F5H3F0;F5H6Q1;F5GYJ8;Q96FW1-2	F5GYN4;J3KR44;Q96FW1;F5H3F0;F5H6Q1;F5GYJ8;Q96FW1-2	Ubiquitin thioesterase OTUB1	OTUB1	tr|F5GYN4|F5GYN4_HUMAN Ubiquitin thioesterase OTUB1 OS=Homo sapiens GN=OTUB1 PE=1 SV=1;tr|J3KR44|J3KR44_HUMAN Ubiquitin thioesterase OTUB1 OS=Homo sapiens GN=OTUB1 PE=1 SV=2;sp|Q96FW1|OTUB1_HUMAN Ubiquitin thioesterase OTUB1 OS=Homo sapiens GN=OTUB1 PE=1 S	138020000	71229000	13950000	9201200	4748600	105680000	94034000	4	4	4	20.3	20.3	20.3	28.05	0	12.581	209250000	9	20.3	10	7	2	7	4	2	4	2	4	2
622	F5GYQ1;P61421;R4GN72;J3QL14;H3BQB4;H3BSG7;H3BQJ1	F5GYQ1;P61421;R4GN72;J3QL14	V-type proton ATPase subunit d 1	ATP6V0D1	tr|F5GYQ1|F5GYQ1_HUMAN V-type proton ATPase subunit d 1 OS=Homo sapiens GN=ATP6V0D1 PE=1 SV=1;sp|P61421|VA0D1_HUMAN V-type proton ATPase subunit d 1 OS=Homo sapiens GN=ATP6V0D1 PE=1 SV=1;tr|R4GN72|R4GN72_HUMAN V-type proton ATPase subunit d 1 OS=Homo sapie	250910000	303280000	29168000	13206000	15962000	262630000	355230000	7	7	7	28.8	28.8	28.8	44.659	0	168.93	554190000	26	23.2	27	13	13	7	6	6	6	6	6	6
623	F5GYU9;F5GZH3;F5H866;F5GZ38;Q9UF11-4;Q9UF11-2;Q9UF11-3;Q9UF11	F5GYU9;F5GZH3;F5H866;F5GZ38;Q9UF11-4;Q9UF11-2;Q9UF11-3;Q9UF11	Pleckstrin homology domain-containing family B member 1	PLEKHB1	tr|F5GYU9|F5GYU9_HUMAN Pleckstrin homology domain-containing family B member 1 OS=Homo sapiens GN=PLEKHB1 PE=4 SV=1;tr|F5GZH3|F5GZH3_HUMAN Pleckstrin homology domain-containing family B member 1 (Fragment) OS=Homo sapiens GN=PLEKHB1 PE=4 SV=1;tr|F5H866|F5H	0	26344000	3293000	0	3293000	0	30318000	1	1	1	13	13	13	15.07	0.0039149	2.3801	26344000	1	0	13	0	1	8	0	1	0	1	0	1
624	F5H324;F5GYY5;P51690;C9J5G7;P51689-2;P51689-3;Q5FYA8;P51689	F5H324;F5GYY5;P51690	Arylsulfatase E	ARSE	tr|F5H324|F5H324_HUMAN Arylsulfatase E OS=Homo sapiens GN=ARSE PE=4 SV=1;tr|F5GYY5|F5GYY5_HUMAN Arylsulfatase E OS=Homo sapiens GN=ARSE PE=4 SV=1;sp|P51690|ARSE_HUMAN Arylsulfatase E OS=Homo sapiens GN=ARSE PE=1 SV=2	508270000	118290000	21605000	17527000	4078900	344060000	190890000	8	8	8	20.6	20.6	20.6	61.077	0	39.23	626560000	17	17.1	13.6	11	6	8	7	5	7	5	7	5
625	F5GZS6;J3KPF3;P08195-3;P08195;P08195-4;H0YFS2;F5GZI0;H0YFX4;F5GZR9	F5GZS6;J3KPF3;P08195-3;P08195;P08195-4	4F2 cell-surface antigen heavy chain	SLC3A2	tr|F5GZS6|F5GZS6_HUMAN 4F2 cell-surface antigen heavy chain OS=Homo sapiens GN=SLC3A2 PE=1 SV=1;tr|J3KPF3|J3KPF3_HUMAN 4F2 cell-surface antigen heavy chain OS=Homo sapiens GN=SLC3A2 PE=1 SV=1;sp|P08195-3|4F2_HUMAN Isoform 3 of 4F2 cell-surface antigen heav	9906800000	8032700000	543620000	300210000	243420000	10073000000	8964600000	28	28	1	51.6	51.6	2.8	64.872	0	323.31	17939000000	334	49.4	46.6	172	162	9	26	26	26	26	1	1
626	F5H0B0;H0YC42;E5RFR7;H0YC44;P55327-8	F5H0B0;H0YC42			tr|F5H0B0|F5H0B0_HUMAN Uncharacterized protein OS=Homo sapiens PE=4 SV=2;tr|H0YC42|H0YC42_HUMAN Uncharacterized protein OS=Homo sapiens PE=4 SV=2	9442000	8484300	1120400	590130	530270	8435500	10367000	6	2	0	29	11.7	0	27.468	0.00056007	4.0525	17926000	4	29	23.4	4	0	5	6	5	2	1	0	0
627	F5H0F9;Q9UJX4;F5GY68;H0YFB5;Q9UJX4-2;Q9UJX4-3;F5H3S5	F5H0F9;Q9UJX4;F5GY68;H0YFB5;Q9UJX4-2;Q9UJX4-3	Anaphase-promoting complex subunit 5	ANAPC5	tr|F5H0F9|F5H0F9_HUMAN Anaphase-promoting complex subunit 5 OS=Homo sapiens GN=ANAPC5 PE=1 SV=1;sp|Q9UJX4|APC5_HUMAN Anaphase-promoting complex subunit 5 OS=Homo sapiens GN=ANAPC5 PE=1 SV=2;tr|F5GY68|F5GY68_HUMAN Anaphase-promoting complex subunit 5 (Fragm	22496000	5062000	626320	511280	115040	15718000	12603000	3	3	3	6.9	6.9	6.9	83.674	0	11.413	27558000	4	6.9	2.3	3	1	7	3	1	3	1	3	1
628	U3KQS6;F5H0K0;P20823-3;P20823-2;P20823;P20823-7;H0YND5;P20823-5;P20823-6;A0A087WYP0;P20823-4;F5H3Z5;P20823-8	U3KQS6;F5H0K0;P20823-3;P20823-2;P20823;P20823-7;H0YND5;P20823-5;P20823-6;A0A087WYP0;P20823-4	Hepatocyte nuclear factor 1-alpha	HNF1A	tr|U3KQS6|U3KQS6_HUMAN Hepatocyte nuclear factor 1-alpha OS=Homo sapiens GN=HNF1A PE=4 SV=1;tr|F5H0K0|F5H0K0_HUMAN Hepatocyte nuclear factor 1-alpha OS=Homo sapiens GN=HNF1A PE=4 SV=1;sp|P20823-3|HNF1A_HUMAN Isoform C of Hepatocyte nuclear factor 1-alpha O	229000000	68289000	15647000	12053000	3594100	144960000	95266000	7	7	7	22.7	22.7	22.7	57.958	0	97.323	297290000	14	20.7	11.8	9	5	13	6	4	6	4	6	4
629	F5H1S8;Q14165;H0YG07;F5GX14	F5H1S8;Q14165;H0YG07	Malectin	MLEC	tr|F5H1S8|F5H1S8_HUMAN Malectin (Fragment) OS=Homo sapiens GN=MLEC PE=1 SV=1;sp|Q14165|MLEC_HUMAN Malectin OS=Homo sapiens GN=MLEC PE=1 SV=1;tr|H0YG07|H0YG07_HUMAN Malectin (Fragment) OS=Homo sapiens GN=MLEC PE=1 SV=1	1230400000	797480000	168990000	102530000	66457000	1000300000	881770000	9	9	9	79.5	79.5	79.5	16.729	0	123.24	2027900000	76	79.5	79.5	37	39	4	9	9	9	9	9	9
630	F5H1S9;G8JLB3;Q9Y606-2;Q9Y606;F5GY32;F5GXL3;F5H168;F8W9U5;F5H1B2	F5H1S9;G8JLB3;Q9Y606-2;Q9Y606	tRNA pseudouridine synthase;tRNA pseudouridine synthase A, mitochondrial	PUS1	tr|F5H1S9|F5H1S9_HUMAN tRNA pseudouridine synthase OS=Homo sapiens GN=PUS1 PE=1 SV=1;tr|G8JLB3|G8JLB3_HUMAN tRNA pseudouridine synthase (Fragment) OS=Homo sapiens GN=PUS1 PE=1 SV=1;sp|Q9Y606-2|TRUA_HUMAN Isoform 2 of tRNA pseudouridine synthase A, mitochon	336510000	233610000	21115000	12463000	8652200	213510000	245290000	9	9	9	27	27	27	41.729	0	91.511	570120000	22	18.4	21.1	12	10	9	6	7	6	7	6	7
631	F5H2U8;F5H2A4;P52926;F5H6H0;P52926-3;P52926-6;P52926-4;P52926-5;P52926-2	F5H2U8;F5H2A4;P52926;F5H6H0;P52926-3;P52926-6;P52926-4;P52926-5;P52926-2	High mobility group protein HMGI-C	HMGA2	tr|F5H2U8|F5H2U8_HUMAN High mobility group protein HMGI-C OS=Homo sapiens GN=HMGA2 PE=1 SV=1;tr|F5H2A4|F5H2A4_HUMAN High mobility group protein HMGI-C OS=Homo sapiens GN=HMGA2 PE=1 SV=1;sp|P52926|HMGA2_HUMAN High mobility group protein HMGI-C OS=Homo sapie	3070200000	2843600000	1478400000	767540000	710900000	3185200000	2990400000	6	6	6	45.5	45.5	45.5	10.767	0	323.31	5913800000	87	45.5	45.5	37	50	9	4	6	4	6	4	6
632	F5H2F4;P11586;V9GYY3	F5H2F4;P11586	C-1-tetrahydrofolate synthase, cytoplasmic;Methylenetetrahydrofolate dehydrogenase;Methenyltetrahydrofolate cyclohydrolase;Formyltetrahydrofolate synthetase;C-1-tetrahydrofolate synthase, cytoplasmic, N-terminally processed	MTHFD1	tr|F5H2F4|F5H2F4_HUMAN C-1-tetrahydrofolate synthase, cytoplasmic OS=Homo sapiens GN=MTHFD1 PE=1 SV=1;sp|P11586|C1TC_HUMAN C-1-tetrahydrofolate synthase, cytoplasmic OS=Homo sapiens GN=MTHFD1 PE=1 SV=3	906290000	599490000	25096000	15105000	9991600	805380000	753420000	22	22	22	33.6	33.6	33.6	110.61	0	105.1	1505800000	58	31.2	18.8	30	28	3	20	14	20	14	20	14
633	F5H2T0;O95163	F5H2T0;O95163	Elongator complex protein 1	IKBKAP	tr|F5H2T0|F5H2T0_HUMAN Elongator complex protein 1 OS=Homo sapiens GN=IKBKAP PE=1 SV=1;sp|O95163|ELP1_HUMAN Elongator complex protein 1 OS=Homo sapiens GN=IKBKAP PE=1 SV=3	9481100	21115000	599920	185900	414020	23272000	18677000	4	4	4	5	5	5	111.47	0.00031496	6.4985	30596000	3	4	2	2	1	2	3	2	3	2	3	2
634	F5H365;Q15436;Q15436-2;G3V4V1;G3V1W4;G3V3G5;G3V2R6;G3V5X8;G3V4Q2;G3V5K1	F5H365;Q15436;Q15436-2	Protein transport protein Sec23A	SEC23A	tr|F5H365|F5H365_HUMAN Protein transport protein Sec23A OS=Homo sapiens GN=SEC23A PE=1 SV=1;sp|Q15436|SC23A_HUMAN Protein transport protein Sec23A OS=Homo sapiens GN=SEC23A PE=1 SV=2;sp|Q15436-2|SC23A_HUMAN Isoform 2 of Protein transport protein Sec23A OS=	777050000	837540000	41400000	19924000	21475000	785200000	812330000	19	19	17	37.4	37.4	33.8	82.968	0	323.31	1614600000	98	35.1	34.8	50	48	10	18	16	18	16	16	15
635	F5H385;Q9BRY0	F5H385;Q9BRY0	Zinc transporter ZIP3	SLC39A3	tr|F5H385|F5H385_HUMAN Zinc transporter ZIP3 OS=Homo sapiens GN=SLC39A3 PE=1 SV=1;sp|Q9BRY0|S39A3_HUMAN Zinc transporter ZIP3 OS=Homo sapiens GN=SLC39A3 PE=1 SV=2	0	19237000	1923700	0	1923700	0	30014000	1	1	1	6.8	6.8	6.8	34.564	0.00031556	6.5328	19237000	0	0	6.8	0	0	2	0	1	0	1	0	1
636	F5H3H7;Q9Y644	F5H3H7;Q9Y644	Beta-1,3-N-acetylglucosaminyltransferase radical fringe	RFNG	tr|F5H3H7|F5H3H7_HUMAN Beta-1,3-N-acetylglucosaminyltransferase radical fringe OS=Homo sapiens GN=RFNG PE=4 SV=2;sp|Q9Y644|RFNG_HUMAN Beta-1,3-N-acetylglucosaminyltransferase radical fringe OS=Homo sapiens GN=RFNG PE=2 SV=3	12571000	13375000	2162100	1047600	1114500	20708000	17775000	1	1	1	8.8	8.8	8.8	22.804	0.00030175	5.4366	25945000	5	8.8	8.8	2	3	2	1	1	1	1	1	1
637	F5H5W1;F5H457;Q9NVM9;F8VRX9;Q9NVM9-2	F5H5W1;F5H457;Q9NVM9;F8VRX9;Q9NVM9-2	Protein asunder homolog	ASUN	tr|F5H5W1|F5H5W1_HUMAN Protein asunder homolog (Fragment) OS=Homo sapiens GN=ASUN PE=1 SV=1;tr|F5H457|F5H457_HUMAN Protein asunder homolog (Fragment) OS=Homo sapiens GN=ASUN PE=1 SV=1;sp|Q9NVM9|ASUN_HUMAN Protein asunder homolog OS=Homo sapiens GN=ASUN PE=	10098000	5807400	1767300	1122000	645270	10098000	6683600	2	2	2	18.4	18.4	18.4	18.418	0.0012658	2.7691	15906000	3	12.9	18.4	1	2	5	1	2	1	2	1	2
638	F5H459;Q92572	F5H459;Q92572	AP-3 complex subunit sigma-1	AP3S1	tr|F5H459|F5H459_HUMAN AP-3 complex subunit sigma-1 OS=Homo sapiens GN=AP3S1 PE=1 SV=1;sp|Q92572|AP3S1_HUMAN AP-3 complex subunit sigma-1 OS=Homo sapiens GN=AP3S1 PE=1 SV=1	19586000	6181100	4294600	3264400	1030200	17498000	7552900	1	1	1	9.3	9.3	9.3	18.771	0.00029682	5.0644	25767000	4	9.3	9.3	2	2	2	1	1	1	1	1	1
639	F5H4B6;Q8IZ83-3;Q8IZ83	F5H4B6;Q8IZ83-3;Q8IZ83	Aldehyde dehydrogenase family 16 member A1	ALDH16A1	tr|F5H4B6|F5H4B6_HUMAN Aldehyde dehydrogenase family 16 member A1 OS=Homo sapiens GN=ALDH16A1 PE=1 SV=1;sp|Q8IZ83-3|A16A1_HUMAN Isoform 3 of Aldehyde dehydrogenase family 16 member A1 OS=Homo sapiens GN=ALDH16A1;sp|Q8IZ83|A16A1_HUMAN Aldehyde dehydrogenase	71186000	62918000	5364200	2847400	2516700	77774000	111730000	3	3	3	8	8	8	67.152	0	8.9454	134100000	8	8	5.5	5	3	3	3	2	3	2	3	2
640	F8VY35;F5H4R6;H0YIV4;P55209-2;P55209;F8W020;F8W118;F8VXI6;F8VUX1;F8VV59;F8W0J6;H0YH88;H0YHC3;F8W543;B7Z9C2;B3KV44;F8VRJ2;F8VVB5	F8VY35;F5H4R6;H0YIV4;P55209-2;P55209;F8W020;F8W118;F8VXI6;F8VUX1;F8VV59;F8W0J6;H0YH88;H0YHC3;F8W543;B7Z9C2;B3KV44;F8VRJ2	Nucleosome assembly protein 1-like 1	NAP1L1	tr|F8VY35|F8VY35_HUMAN Nucleosome assembly protein 1-like 1 (Fragment) OS=Homo sapiens GN=NAP1L1 PE=1 SV=1;tr|F5H4R6|F5H4R6_HUMAN Nucleosome assembly protein 1-like 1 OS=Homo sapiens GN=NAP1L1 PE=1 SV=1;tr|H0YIV4|H0YIV4_HUMAN Nucleosome assembly protein 1-	257680000	153100000	31599000	19822000	11777000	186020000	205610000	7	7	6	44.7	44.7	40.9	31.02	0	26.703	410780000	23	44.7	17.4	16	7	18	7	3	7	3	6	3
641	F5H5D3;Q9BQE3;F8VVB9;F8VQQ4;F8VRZ4;F8VS66;F8VX09;F8VWV9;C9K0S6;F8VRK0;F8VXZ7;F8W0F6;Q9H853	F5H5D3;Q9BQE3	Tubulin alpha-1C chain	TUBA1C	tr|F5H5D3|F5H5D3_HUMAN Tubulin alpha-1C chain OS=Homo sapiens GN=TUBA1C PE=1 SV=1;sp|Q9BQE3|TBA1C_HUMAN Tubulin alpha-1C chain OS=Homo sapiens GN=TUBA1C PE=1 SV=1	681490000	750730000	51151000	24339000	26812000	559000000	699840000	23	3	2	51.8	10.4	7.9	57.73	0	88.697	1432200000	53	51.8	51.8	28	25	13	23	22	3	3	2	2
642	H0Y8R1;F5H5I6;H0YAK1;Q12849;Q12849-5;H0YAM1	H0Y8R1;F5H5I6;H0YAK1;Q12849;Q12849-5	G-rich sequence factor 1	GRSF1	tr|H0Y8R1|H0Y8R1_HUMAN G-rich sequence factor 1 (Fragment) OS=Homo sapiens GN=GRSF1 PE=1 SV=1;tr|F5H5I6|F5H5I6_HUMAN G-rich sequence factor 1 OS=Homo sapiens GN=GRSF1 PE=1 SV=2;tr|H0YAK1|H0YAK1_HUMAN G-rich sequence factor 1 (Fragment) OS=Homo sapiens GN=G	654560000	369770000	40973000	26182000	14791000	468480000	496620000	11	11	11	39.3	39.3	39.3	47.27	0	67.491	1024300000	46	39.3	31.4	21	25	6	10	9	10	9	10	9
643	F5H5P2;P12694;P12694-2;F5GXU9;M0R0C8;H0YH31	F5H5P2;P12694;P12694-2;F5GXU9;M0R0C8	2-oxoisovalerate dehydrogenase subunit alpha, mitochondrial	BCKDHA	tr|F5H5P2|F5H5P2_HUMAN Uncharacterized protein OS=Homo sapiens PE=4 SV=1;sp|P12694|ODBA_HUMAN 2-oxoisovalerate dehydrogenase subunit alpha, mitochondrial OS=Homo sapiens GN=BCKDHA PE=1 SV=2;sp|P12694-2|ODBA_HUMAN Isoform 2 of 2-oxoisovalerate dehydrogenase	155530000	37363000	6651500	5363100	1288400	124210000	54923000	7	7	7	22.3	22.3	22.3	54.202	0	25.254	192890000	14	22.3	8.4	12	2	6	7	2	7	2	7	2
644	F5H5U2;Q8NHQ9;E7EX41;Q8NHQ9-2	F5H5U2;Q8NHQ9;E7EX41	ATP-dependent RNA helicase DDX55	DDX55	tr|F5H5U2|F5H5U2_HUMAN ATP-dependent RNA helicase DDX55 OS=Homo sapiens GN=DDX55 PE=1 SV=1;sp|Q8NHQ9|DDX55_HUMAN ATP-dependent RNA helicase DDX55 OS=Homo sapiens GN=DDX55 PE=1 SV=3;tr|E7EX41|E7EX41_HUMAN ATP-dependent RNA helicase DDX55 OS=Homo sapiens GN=	50314000	9404100	1614000	1359800	254160	32914000	22178000	3	3	3	6.3	6.3	6.3	65.19	0.00029806	5.196	59718000	7	6.3	4.9	4	3	4	3	2	3	2	3	2
645	H7C5W6;F5H619;Q86XA9-2;Q86XA9	H7C5W6;F5H619;Q86XA9-2;Q86XA9	HEAT repeat-containing protein 5A	HEATR5A	tr|H7C5W6|H7C5W6_HUMAN HEAT repeat-containing protein 5A (Fragment) OS=Homo sapiens GN=HEATR5A PE=1 SV=1;tr|F5H619|F5H619_HUMAN HEAT repeat-containing protein 5A OS=Homo sapiens GN=HEATR5A PE=1 SV=1;sp|Q86XA9-2|HTR5A_HUMAN Isoform 2 of HEAT repeat-containi	32170000	4484600	458180	402120	56058	25700000	12052000	3	3	3	3.2	3.2	3.2	174.02	0.00057192	4.3422	36655000	3	3.2	1.1	3	0	4	3	1	3	1	3	1
646	F5H669;Q8N684-2;Q8N684;Q8N684-3;J3QT54;F5H6M0;F5H047	F5H669;Q8N684-2;Q8N684;Q8N684-3;J3QT54;F5H6M0;F5H047	Cleavage and polyadenylation specificity factor subunit 7	CPSF7	tr|F5H669|F5H669_HUMAN Cleavage and polyadenylation-specificity factor subunit 7 (Fragment) OS=Homo sapiens GN=CPSF7 PE=1 SV=1;sp|Q8N684-2|CPSF7_HUMAN Isoform 2 of Cleavage and polyadenylation specificity factor subunit 7 OS=Homo sapiens GN=CPSF7;sp|Q8N684	422220000	413920000	36354000	18357000	17997000	347310000	534510000	6	6	6	19.5	19.5	19.5	41.265	0	59.395	836140000	27	17.1	16.6	14	13	7	5	5	5	5	5	5
647	F5H6T1;P61160;P61160-2	F5H6T1;P61160;P61160-2	Actin-related protein 2	ACTR2	tr|F5H6T1|F5H6T1_HUMAN ARP2 actin-related protein 2 homolog (Yeast), isoform CRA_d OS=Homo sapiens GN=ACTR2 PE=1 SV=2;sp|P61160|ARP2_HUMAN Actin-related protein 2 OS=Homo sapiens GN=ACTR2 PE=1 SV=1;sp|P61160-2|ARP2_HUMAN Isoform 2 of Actin-related protein	146100000	24894000	10058000	8594000	1464300	120310000	37760000	2	2	2	7.7	7.7	7.7	38.841	0.00029231	4.7527	170990000	6	7.7	7.7	3	3	3	2	2	2	2	2	2
648	F5H6U7;Q9Y3E0;F5GWD8;F5GXH6;G3V1U5	F5H6U7;Q9Y3E0;F5GWD8;F5GXH6;G3V1U5	Vesicle transport protein GOT1B	GOLT1B	tr|F5H6U7|F5H6U7_HUMAN Vesicle transport protein GOT1B OS=Homo sapiens GN=GOLT1B PE=1 SV=1;sp|Q9Y3E0|GOT1B_HUMAN Vesicle transport protein GOT1B OS=Homo sapiens GN=GOLT1B PE=1 SV=1;tr|F5GWD8|F5GWD8_HUMAN Vesicle transport protein GOT1B OS=Homo sapiens GN=G	210410000	219430000	85968000	42082000	43886000	136950000	162600000	2	2	2	18	18	18	14.307	0	34.785	429840000	16	18	10.9	10	6	5	2	1	2	1	2	1
649	F5H702;Q96GC5-3;Q96GC5;F5H8D0	F5H702;Q96GC5-3;Q96GC5	39S ribosomal protein L48, mitochondrial	MRPL48	tr|F5H702|F5H702_HUMAN 39S ribosomal protein L48, mitochondrial OS=Homo sapiens GN=MRPL48 PE=1 SV=1;sp|Q96GC5-3|RM48_HUMAN Isoform 2 of 39S ribosomal protein L48, mitochondrial OS=Homo sapiens GN=MRPL48;sp|Q96GC5|RM48_HUMAN 39S ribosomal protein L48, mitoc	572090000	308980000	125870000	81727000	44140000	367830000	339000000	3	3	3	31.9	31.9	31.9	12.77	0	25.308	881070000	24	31.9	31.9	10	14	4	3	3	3	3	3	3
650	G5EA44;F5H7W8;Q96C57;F5H8B7;F5H3K2;H0YGK4;E7ENF1;H0YF83	G5EA44;F5H7W8;Q96C57;F5H8B7;F5H3K2;H0YGK4;E7ENF1	Uncharacterized protein C12orf43	C12orf43	tr|G5EA44|G5EA44_HUMAN Chromosome 12 open reading frame 43, isoform CRA_b OS=Homo sapiens GN=C12orf43 PE=1 SV=1;tr|F5H7W8|F5H7W8_HUMAN Uncharacterized protein C12orf43 OS=Homo sapiens GN=C12orf43 PE=1 SV=1;sp|Q96C57|CL043_HUMAN Uncharacterized protein C12o	64891000	69901000	9628000	4635100	4992900	50068000	71225000	3	3	3	23.8	23.8	23.8	27.048	0	21.701	134790000	7	23.8	15.5	3	4	8	3	2	3	2	3	2
651	F5H8D7;P18887	F5H8D7;P18887	DNA repair protein XRCC1	XRCC1	tr|F5H8D7|F5H8D7_HUMAN DNA repair protein XRCC1 OS=Homo sapiens GN=XRCC1 PE=4 SV=2;sp|P18887|XRCC1_HUMAN DNA repair protein XRCC1 OS=Homo sapiens GN=XRCC1 PE=1 SV=2	20565000	37493000	1872800	663390	1209400	24126000	43952000	2	2	2	3.3	3.3	3.3	66.013	0.00029351	4.8237	58058000	3	3.3	3.3	1	2	2	2	2	2	2	2	2
652	H0YBF6;F5H8F7;Q9UBL3-2;Q9UBL3-3;Q9UBL3	H0YBF6;F5H8F7;Q9UBL3-2;Q9UBL3-3;Q9UBL3	Set1/Ash2 histone methyltransferase complex subunit ASH2	ASH2L	tr|H0YBF6|H0YBF6_HUMAN Set1/Ash2 histone methyltransferase complex subunit ASH2 (Fragment) OS=Homo sapiens GN=ASH2L PE=4 SV=1;tr|F5H8F7|F5H8F7_HUMAN Set1/Ash2 histone methyltransferase complex subunit ASH2 OS=Homo sapiens GN=ASH2L PE=1 SV=1;sp|Q9UBL3-2|ASH	0	0	0	0	0	0	0	1	1	1	9.4	9.4	9.4	21.743	0.0015008	2.6906	0	1	9.4	0	1	0	5	1	0	1	0	1	0
653	F6RJM5;Q96S38-2;Q96S38	F6RJM5;Q96S38-2;Q96S38	Ribosomal protein S6 kinase delta-1	RPS6KC1	tr|F6RJM5|F6RJM5_HUMAN Ribosomal protein S6 kinase delta-1 OS=Homo sapiens GN=RPS6KC1 PE=1 SV=1;sp|Q96S38-2|KS6C1_HUMAN Isoform 2 of Ribosomal protein S6 kinase delta-1 OS=Homo sapiens GN=RPS6KC1;sp|Q96S38|KS6C1_HUMAN Ribosomal protein S6 kinase delta-1 OS	494380000	328310000	13487000	8104600	5382200	480420000	341630000	1	1	1	0.9	0.9	0.9	97.872	1	-2	822700000	9	0.9	0.9	3	6	3	1	1	1	1	1	1
654	H7C3P4;F6S8M0;P15586-2;P15586;F5H4C6;H0YFA9	H7C3P4;F6S8M0;P15586-2;P15586;F5H4C6	N-acetylglucosamine-6-sulfatase	GNS	tr|H7C3P4|H7C3P4_HUMAN Glucosamine (N-acetyl)-6-sulfatase (Sanfilippo disease IIID), isoform CRA_b OS=Homo sapiens GN=GNS PE=1 SV=1;tr|F6S8M0|F6S8M0_HUMAN N-acetylglucosamine-6-sulfatase OS=Homo sapiens GN=GNS PE=1 SV=1;sp|P15586-2|GNS_HUMAN Isoform 2 of N	8926800	74497000	3336900	357070	2979900	41822000	65570000	5	5	5	14.9	14.9	14.9	56.374	0.00030432	5.6069	83424000	6	2.4	14.9	1	5	6	1	5	1	5	1	5
655	G3V2Q5;G3V5Y4;F6S9Y6;V9GYX7;Q9NZ32	G3V2Q5;G3V5Y4;F6S9Y6;V9GYX7;Q9NZ32	Actin-related protein 10	ACTR10	tr|G3V2Q5|G3V2Q5_HUMAN Actin-related protein 10 OS=Homo sapiens GN=ACTR10 PE=1 SV=1;tr|G3V5Y4|G3V5Y4_HUMAN Actin-related protein 10 OS=Homo sapiens GN=ACTR10 PE=1 SV=1;tr|F6S9Y6|F6S9Y6_HUMAN Actin-related protein 10 OS=Homo sapiens GN=ACTR10 PE=1 SV=1;tr|V	0	0	0	0	0	0	0	1	1	1	11.1	11.1	11.1	14.334	0.0076299	2.0787	0	1	11.1	0	1	0	5	1	0	1	0	1	0
656	F6T1Q0;Q6L8Q7-2;Q6L8Q7	F6T1Q0;Q6L8Q7-2;Q6L8Q7	2,5-phosphodiesterase 12	PDE12	tr|F6T1Q0|F6T1Q0_HUMAN 2,5-phosphodiesterase 12 OS=Homo sapiens GN=PDE12 PE=1 SV=1;sp|Q6L8Q7-2|PDE12_HUMAN Isoform 2 of 2,5-phosphodiesterase 12 OS=Homo sapiens GN=PDE12;sp|Q6L8Q7|PDE12_HUMAN 2,5-phosphodiesterase 12 OS=Homo sapiens GN=PDE12 PE=1 SV=	240340000	117780000	14325000	9613700	4711400	200780000	198620000	9	9	9	30.5	30.5	30.5	52.175	0	32.309	358130000	18	30.5	13.1	13	5	3	9	4	9	4	9	4
657	Q5SZR4;F6TB26;Q9Y2W6;E9PKN8;Q9Y2W6-3	Q5SZR4;F6TB26;Q9Y2W6	Tudor and KH domain-containing protein	TDRKH	tr|Q5SZR4|Q5SZR4_HUMAN Tudor and KH domain containing, isoform CRA_a OS=Homo sapiens GN=TDRKH PE=4 SV=1;tr|F6TB26|F6TB26_HUMAN Tudor and KH domain-containing protein OS=Homo sapiens GN=TDRKH PE=4 SV=1;sp|Q9Y2W6|TDRKH_HUMAN Tudor and KH domain-containing pr	0	51473000	1608500	0	1608500	0	64351000	3	3	3	9.3	9.3	9.3	61.52	0.00031358	6.3017	51473000	2	0	9.3	0	2	5	0	3	0	3	0	3
658	F6TLX2;Q9HC38-2;Q9HC38;I3L3Q4;I3L1I0	F6TLX2;Q9HC38-2;Q9HC38;I3L3Q4	Glyoxalase domain-containing protein 4	GLOD4	tr|F6TLX2|F6TLX2_HUMAN Glyoxalase domain-containing protein 4 OS=Homo sapiens GN=GLOD4 PE=1 SV=1;sp|Q9HC38-2|GLOD4_HUMAN Isoform 2 of Glyoxalase domain-containing protein 4 OS=Homo sapiens GN=GLOD4;sp|Q9HC38|GLOD4_HUMAN Glyoxalase domain-containing protein	66996000	46565000	3244600	1914200	1330400	59718000	66409000	3	3	3	6.4	6.4	6.4	54.719	0	9.3889	113560000	5	6.4	2.6	4	1	5	3	1	3	1	3	1
659	F6V2D4;O00214;O00214-2;H7BXD8;E9PN19;E9PJ77;E9PRN3;B1ANM0;Q5T3P9	F6V2D4;O00214;O00214-2;H7BXD8;E9PN19	Galectin;Galectin-8	LGALS8	tr|F6V2D4|F6V2D4_HUMAN Galectin OS=Homo sapiens GN=LGALS8 PE=4 SV=1;sp|O00214|LEG8_HUMAN Galectin-8 OS=Homo sapiens GN=LGALS8 PE=1 SV=4;sp|O00214-2|LEG8_HUMAN Isoform 2 of Galectin-8 OS=Homo sapiens GN=LGALS8;tr|H7BXD8|H7BXD8_HUMAN Galectin (Fragment) OS=H	496990000	222800000	37884000	26157000	11726000	412400000	273050000	6	6	6	17.7	17.7	17.7	33.985	0	29.778	719790000	23	17.7	17.7	15	8	9	6	6	6	6	6	6
660	F6WFU6;Q9NZJ7-2;Q9NZJ7;Q5TDC2;H0Y8C3;Q9NZJ7-3;H7C196	F6WFU6;Q9NZJ7-2;Q9NZJ7;Q5TDC2;H0Y8C3	Mitochondrial carrier homolog 1	MTCH1	tr|F6WFU6|F6WFU6_HUMAN Mitochondrial carrier homolog 1 OS=Homo sapiens GN=MTCH1 PE=1 SV=1;sp|Q9NZJ7-2|MTCH1_HUMAN Isoform 2 of Mitochondrial carrier homolog 1 OS=Homo sapiens GN=MTCH1;sp|Q9NZJ7|MTCH1_HUMAN Mitochondrial carrier homolog 1 OS=Homo sapiens GN	709190000	891850000	106740000	47280000	59457000	726840000	851790000	10	10	10	42.1	42.1	42.1	39.97	0	100.71	1601000000	65	38.6	31.4	28	37	7	9	9	9	9	9	9
661	F6XEV2;Q9BPX6;Q9BPX6-3;Q9BPX6-5;Q9BPX6-4;Q9BPX6-2;E9PQV6;S4R3W3;S4R3D7;S4R3V1	F6XEV2;Q9BPX6;Q9BPX6-3;Q9BPX6-5;Q9BPX6-4;Q9BPX6-2;E9PQV6	Calcium uptake protein 1, mitochondrial	MICU1	tr|F6XEV2|F6XEV2_HUMAN Calcium uptake protein 1, mitochondrial OS=Homo sapiens GN=MICU1 PE=1 SV=2;sp|Q9BPX6|MICU1_HUMAN Calcium uptake protein 1, mitochondrial OS=Homo sapiens GN=MICU1 PE=1 SV=1;sp|Q9BPX6-3|MICU1_HUMAN Isoform 3 of Calcium uptake protein 1	234610000	150400000	12420000	7567900	4851700	174440000	176000000	8	8	8	23.6	23.6	23.6	54.578	0	46.57	385010000	28	22.2	16.9	14	14	10	7	6	7	6	7	6
662	F8VPD4;P27708;H7BZB3;H7C2E4;H7C3Z5	F8VPD4;P27708	CAD protein;Glutamine-dependent carbamoyl-phosphate synthase;Aspartate carbamoyltransferase;Dihydroorotase	CAD	tr|F8VPD4|F8VPD4_HUMAN CAD protein OS=Homo sapiens GN=CAD PE=1 SV=1;sp|P27708|PYR1_HUMAN CAD protein OS=Homo sapiens GN=CAD PE=1 SV=3	201910000	132720000	2909800	1755700	1154000	170570000	155810000	16	16	16	11.6	11.6	11.6	236.02	0	43.634	334630000	29	9.8	6.9	16	13	5	13	11	13	11	13	11
663	H0YH87;F8WB06;F8VQP2;V9GY86;Q99700-2;Q24JQ7;Q99700-4;Q99700;F8W0B5;F8WB05	H0YH87;F8WB06;F8VQP2;V9GY86;Q99700-2;Q24JQ7;Q99700-4;Q99700	Ataxin-2	ATXN2	tr|H0YH87|H0YH87_HUMAN Ataxin-2 (Fragment) OS=Homo sapiens GN=ATXN2 PE=1 SV=1;tr|F8WB06|F8WB06_HUMAN Ataxin-2 OS=Homo sapiens GN=ATXN2 PE=1 SV=1;tr|F8VQP2|F8VQP2_HUMAN Ataxin-2 OS=Homo sapiens GN=ATXN2 PE=1 SV=1;tr|V9GY86|V9GY86_HUMAN Ataxin-2 OS=Homo sapi	16180000	0	337080	337080	0	14750000	0	3	3	3	8.6	8.6	8.6	98.004	0.00054215	3.5643	16180000	4	6.8	1.9	3	1	10	2	1	2	1	2	1
664	F8VS81;Q12792-4;Q12792;Q12792-3	F8VS81;Q12792-4;Q12792;Q12792-3	Twinfilin-1	TWF1	tr|F8VS81|F8VS81_HUMAN Twinfilin-1 (Fragment) OS=Homo sapiens GN=TWF1 PE=1 SV=1;sp|Q12792-4|TWF1_HUMAN Isoform 4 of Twinfilin-1 OS=Homo sapiens GN=TWF1;sp|Q12792|TWF1_HUMAN Twinfilin-1 OS=Homo sapiens GN=TWF1 PE=1 SV=3;sp|Q12792-3|TWF1_HUMAN Isoform 3 of T	0	37109000	1953100	0	1953100	0	51577000	3	3	3	14.8	14.8	14.8	33.408	0.00031506	6.4985	37109000	4	6.5	14.8	1	3	4	1	3	1	3	1	3
665	F8VSC5;Q6P3W7;H0YIK6	F8VSC5;Q6P3W7;H0YIK6	SCY1-like protein 2	SCYL2	tr|F8VSC5|F8VSC5_HUMAN SCY1-like protein 2 (Fragment) OS=Homo sapiens GN=SCYL2 PE=1 SV=1;sp|Q6P3W7|SCYL2_HUMAN SCY1-like protein 2 OS=Homo sapiens GN=SCYL2 PE=1 SV=1;tr|H0YIK6|H0YIK6_HUMAN SCY1-like protein 2 (Fragment) OS=Homo sapiens GN=SCYL2 PE=1 SV=1	17357000	0	423350	423350	0	14430000	0	2	2	2	4.3	4.3	4.3	77.053	0.0098545	1.9334	17357000	1	4.3	0	1	0	3	2	0	2	0	2	0
666	F8VSD4;F8VV71;P61088;F8VZ29;F8VQQ8	F8VSD4;F8VV71;P61088;F8VZ29	Ubiquitin-conjugating enzyme E2 N	UBE2N	tr|F8VSD4|F8VSD4_HUMAN Ubiquitin-conjugating enzyme E2 N OS=Homo sapiens GN=UBE2N PE=1 SV=1;tr|F8VV71|F8VV71_HUMAN Ubiquitin-conjugating enzyme E2 N OS=Homo sapiens GN=UBE2N PE=1 SV=1;sp|P61088|UBE2N_HUMAN Ubiquitin-conjugating enzyme E2 N OS=Homo sapiens	52695000	116000000	21086000	6586900	14499000	72983000	129570000	3	3	3	40	40	40	11.983	0	8.4859	168690000	12	33.3	40	6	6	5	2	3	2	3	2	3
667	F8VSL3;P25208	F8VSL3;P25208	Nuclear transcription factor Y subunit beta	NFYB	tr|F8VSL3|F8VSL3_HUMAN Nuclear transcription factor Y subunit beta (Fragment) OS=Homo sapiens GN=NFYB PE=1 SV=1;sp|P25208|NFYB_HUMAN Nuclear transcription factor Y subunit beta OS=Homo sapiens GN=NFYB PE=1 SV=2	13195000	0	3298700	3298700	0	11788000	0	1	1	1	9.9	9.9	9.9	14.548	0.0053243	2.2601	13195000	0	9.9	0	0	0	2	1	0	1	0	1	0
668	J3KPG5;F8VU39;Q9UIF9-2;Q9UIF9-3;Q9UIF9;H0YHL2;H0YHQ7	J3KPG5;F8VU39;Q9UIF9-2;Q9UIF9-3;Q9UIF9	Bromodomain adjacent to zinc finger domain protein 2A	BAZ2A	tr|J3KPG5|J3KPG5_HUMAN Bromodomain adjacent to zinc finger domain protein 2A OS=Homo sapiens GN=BAZ2A PE=1 SV=1;tr|F8VU39|F8VU39_HUMAN Bromodomain adjacent to zinc finger domain protein 2A OS=Homo sapiens GN=BAZ2A PE=1 SV=1;sp|Q9UIF9-2|BAZ2A_HUMAN Isoform	161350000	48205000	2910400	2240900	669520	103080000	73369000	8	8	8	9.2	9.2	9.2	208.07	0	21.657	209550000	16	9.2	4.5	12	4	7	8	4	8	4	8	4
669	F8VUJ3;Q8N4A0;Q8N4A0-2	F8VUJ3;Q8N4A0;Q8N4A0-2	Polypeptide N-acetylgalactosaminyltransferase;Polypeptide N-acetylgalactosaminyltransferase 4	POC1B-GALNT4;GALNT4	tr|F8VUJ3|F8VUJ3_HUMAN Polypeptide N-acetylgalactosaminyltransferase OS=Homo sapiens GN=POC1B-GALNT4 PE=3 SV=1;sp|Q8N4A0|GALT4_HUMAN Polypeptide N-acetylgalactosaminyltransferase 4 OS=Homo sapiens GN=GALNT4 PE=1 SV=2;sp|Q8N4A0-2|GALT4_HUMAN Isoform 2 of Po	21806000	31514000	1615800	660800	954970	0	31945000	2	2	2	5	5	5	66.237	0.00080171	3.3634	53320000	1	5	2.6	1	0	3	2	1	2	1	2	1
670	F8VV56;F8W022;F8VWK8;P08962-3;P08962-2;P08962;F8VNT9	F8VV56;F8W022;F8VWK8;P08962-3;P08962-2;P08962;F8VNT9	Tetraspanin;CD63 antigen	CD63	tr|F8VV56|F8VV56_HUMAN CD63 antigen OS=Homo sapiens GN=CD63 PE=1 SV=1;tr|F8W022|F8W022_HUMAN Tetraspanin (Fragment) OS=Homo sapiens GN=CD63 PE=1 SV=1;tr|F8VWK8|F8VWK8_HUMAN Tetraspanin (Fragment) OS=Homo sapiens GN=CD63 PE=1 SV=1;sp|P08962-3|CD63_HUMAN Iso	148780000	74457000	18603000	12398000	6204700	127160000	58525000	2	2	2	13.8	13.8	13.8	16.021	0	49.424	223230000	8	6.9	13.8	3	5	7	1	2	1	2	1	2
671	F8W651;F8VVA7;P61923;F8VYK5;P61923-2;P61923-3;P61923-4;F8VXB1;F8VUC5;F8W156;F8VYZ4;P61923-5	F8W651;F8VVA7;P61923;F8VYK5;P61923-2;P61923-3;P61923-4	Coatomer subunit zeta-1	COPZ1	tr|F8W651|F8W651_HUMAN Coatomer subunit zeta-1 OS=Homo sapiens GN=COPZ1 PE=1 SV=1;tr|F8VVA7|F8VVA7_HUMAN Coatomer subunit zeta-1 OS=Homo sapiens GN=COPZ1 PE=1 SV=1;sp|P61923|COPZ1_HUMAN Coatomer subunit zeta-1 OS=Homo sapiens GN=COPZ1 PE=1 SV=1;tr|F8VYK5|F	124420000	96537000	55239000	31105000	24134000	110480000	93602000	3	3	3	31.1	31.1	31.1	13.393	0	18.171	220960000	5	31.1	31.1	3	2	12	2	3	2	3	2	3
672	F8VVL1;O43583	F8VVL1;O43583	Density-regulated protein	DENR	tr|F8VVL1|F8VVL1_HUMAN Density-regulated protein OS=Homo sapiens GN=DENR PE=1 SV=1;sp|O43583|DENR_HUMAN Density-regulated protein OS=Homo sapiens GN=DENR PE=1 SV=2	5353700	0	669220	669220	0	5258300	0	1	1	1	13.8	13.8	13.8	17.77	0.0012762	2.8612	5353700	2	13.8	0	2	0	2	1	0	1	0	1	0
673	F8VVQ3;F8VZA2;Q6P1Q0;Q6P1Q0-7;F8VP71;Q6P1Q0-4;Q6P1Q0-2;H0YHF4;H0YIV5;F8VS60;F8W0R0;F8W1Z2;F8VR33;F8VPY5;Q6P1Q0-5;F8VXQ4;F8VQE7;F8WCD9;F8VTR1;F8W6J0;Q6P1Q0-6;Q6P1Q0-3	F8VVQ3;F8VZA2;Q6P1Q0;Q6P1Q0-7;F8VP71;Q6P1Q0-4;Q6P1Q0-2;H0YHF4;H0YIV5;F8VS60;F8W0R0;F8W1Z2	LETM1 domain-containing protein 1	LETMD1	tr|F8VVQ3|F8VVQ3_HUMAN LETM1 domain-containing protein 1 (Fragment) OS=Homo sapiens GN=LETMD1 PE=4 SV=3;tr|F8VZA2|F8VZA2_HUMAN LETM1 domain-containing protein 1 (Fragment) OS=Homo sapiens GN=LETMD1 PE=4 SV=3;sp|Q6P1Q0|LTMD1_HUMAN LETM1 domain-containing pr	87871000	61935000	8812200	5168900	3643300	75691000	87446000	5	5	5	23.8	23.8	23.8	29.929	0.00031447	6.4708	149810000	7	23.8	16.1	4	3	22	5	3	5	3	5	3
674	F8VXU5;Q9UBQ0;Q9UBQ0-2	F8VXU5;Q9UBQ0;Q9UBQ0-2	Vacuolar protein sorting-associated protein 29	VPS29	tr|F8VXU5|F8VXU5_HUMAN Vacuolar protein sorting-associated protein 29 OS=Homo sapiens GN=VPS29 PE=1 SV=1;sp|Q9UBQ0|VPS29_HUMAN Vacuolar protein sorting-associated protein 29 OS=Homo sapiens GN=VPS29 PE=1 SV=1;sp|Q9UBQ0-2|VPS29_HUMAN Isoform 2 of Vacuolar p	28139000	62062000	7516800	2344900	5171800	0	57462000	3	3	3	16.8	16.8	16.8	23.98	0.00030826	5.9032	90201000	3	10.7	6.1	1	2	3	2	1	2	1	2	1
675	F8VYE8;P36873;P36873-2;F8VR82;F8W0W8;A0A087WYY5	F8VYE8;P36873;P36873-2;F8VR82;F8W0W8;A0A087WYY5	Serine/threonine-protein phosphatase;Serine/threonine-protein phosphatase PP1-gamma catalytic subunit	PPP1CC	tr|F8VYE8|F8VYE8_HUMAN Serine/threonine-protein phosphatase OS=Homo sapiens GN=PPP1CC PE=1 SV=1;sp|P36873|PP1G_HUMAN Serine/threonine-protein phosphatase PP1-gamma catalytic subunit OS=Homo sapiens GN=PPP1CC PE=1 SV=1;sp|P36873-2|PP1G_HUMAN Isoform Gamma-2	113260000	153900000	15715000	6662100	9052900	133040000	143550000	15	2	2	56.6	7.9	7.9	34.95	0	25.246	267150000	6	56.2	55.9	3	3	6	14	14	2	2	2	2
676	F8VYN8;J3KNW7;Q9Y592-2;Q9Y592	F8VYN8;J3KNW7;Q9Y592-2;Q9Y592	Centrosomal protein of 83 kDa	CEP83	tr|F8VYN8|F8VYN8_HUMAN Centrosomal protein of 83 kDa OS=Homo sapiens GN=CEP83 PE=4 SV=1;tr|J3KNW7|J3KNW7_HUMAN Centrosomal protein of 83 kDa OS=Homo sapiens GN=CEP83 PE=4 SV=1;sp|Q9Y592-2|CEP83_HUMAN Isoform 2 of Centrosomal protein of 83 kDa OS=Homo sapie	12013000000	12481000000	874780000	429040000	445740000	11897000000	12090000000	2	2	2	4.5	4.5	4.5	41.53	0.0096267	1.9441	24494000000	8	4.5	4.5	4	4	4	2	2	2	2	2	2
677	F8VYY9;P54619-2;P54619;P54619-3;F8VPF5;H0YHF8;F8VVA3;F8VZX1;H0YIC9;E9PGP6;Q9UGJ0-2;Q9UGJ0-3;Q9UGJ0	F8VYY9;P54619-2;P54619;P54619-3;F8VPF5	5-AMP-activated protein kinase subunit gamma-1	PRKAG1	tr|F8VYY9|F8VYY9_HUMAN 5-AMP-activated protein kinase subunit gamma-1 OS=Homo sapiens GN=PRKAG1 PE=1 SV=1;sp|P54619-2|AAKG1_HUMAN Isoform 2 of 5-AMP-activated protein kinase subunit gamma-1 OS=Homo sapiens GN=PRKAG1;sp|P54619|AAKG1_HUMAN 5-AMP-activated	27490000	59425000	4345700	1374500	2971300	58488000	56157000	5	5	5	25.7	25.7	25.7	31.905	0	9.6559	86915000	6	11.4	20.7	2	4	13	2	4	2	4	2	4
678	F8VZQ9;P82979;H0YHG0;F8VS12	F8VZQ9;P82979;H0YHG0	SAP domain-containing ribonucleoprotein	SARNP	tr|F8VZQ9|F8VZQ9_HUMAN SAP domain-containing ribonucleoprotein OS=Homo sapiens GN=SARNP PE=1 SV=1;sp|P82979|SARNP_HUMAN SAP domain-containing ribonucleoprotein OS=Homo sapiens GN=SARNP PE=1 SV=3;tr|H0YHG0|H0YHG0_HUMAN Uncharacterized protein (Fragment) OS=	85932000	69923000	9740900	5370700	4370200	62359000	84821000	3	3	3	13.6	13.6	13.6	24.105	0.00054025	3.5217	155850000	6	8.9	9.4	3	3	4	2	2	2	2	2	2
679	F8VZV9;Q96DY2-3;Q96DY2-2;Q96DY2	F8VZV9;Q96DY2-3;Q96DY2-2;Q96DY2	IQ domain-containing protein D	IQCD	tr|F8VZV9|F8VZV9_HUMAN IQ domain-containing protein D OS=Homo sapiens GN=IQCD PE=4 SV=1;sp|Q96DY2-3|IQCD_HUMAN Isoform 3 of IQ domain-containing protein D OS=Homo sapiens GN=IQCD;sp|Q96DY2-2|IQCD_HUMAN Isoform 2 of IQ domain-containing protein D OS=Homo sa	0	27207000	850220	0	850220	0	31312000	2	2	2	4.1	4.1	4.1	47.054	0.0055623	2.2526	27207000	3	1.9	4.1	1	2	4	1	2	1	2	1	2
680	F8VZX2;Q15366-5;Q15366-2;H3BRU6;Q15366;B4DXP5;F8W0G4;F8VXH9;F8W1G6;J3QT27;P57721-2;P57721-3;F8VTZ0;H3BND9;H3BSP4;H3BSS4	F8VZX2;Q15366-5;Q15366-2;H3BRU6;Q15366;B4DXP5;F8W0G4;F8VXH9	Poly(rC)-binding protein 2	PCBP2	tr|F8VZX2|F8VZX2_HUMAN Poly(rC)-binding protein 2 OS=Homo sapiens GN=PCBP2 PE=1 SV=1;sp|Q15366-5|PCBP2_HUMAN Isoform 5 of Poly(rC)-binding protein 2 OS=Homo sapiens GN=PCBP2;sp|Q15366-2|PCBP2_HUMAN Isoform 2 of Poly(rC)-binding protein 2 OS=Homo sapiens GN	0	9161400	458070	0	458070	0	10544000	13	1	1	67.6	4.7	4.7	33.8	0.0022377	2.6073	9161400	2	57.6	67.6	0	2	16	11	12	0	1	0	1
681	F8W031;F8VXJ7;F8VP03;H0YIH9;F8W1U5;F8W1K5;Q9Y2B0-2	F8W031;F8VXJ7;F8VP03		CNPY2	tr|F8W031|F8W031_HUMAN Uncharacterized protein (Fragment) OS=Homo sapiens PE=4 SV=1;tr|F8VXJ7|F8VXJ7_HUMAN Protein canopy homolog 2 (Fragment) OS=Homo sapiens GN=CNPY2 PE=4 SV=1;tr|F8VP03|F8VP03_HUMAN Uncharacterized protein (Fragment) OS=Homo sapiens PE=4	388750000	331640000	40022000	21597000	18424000	368130000	344480000	5	4	0	24.3	20.9	0	29.224	0	60.057	720390000	20	24.3	24.3	15	5	7	5	5	4	4	0	0
682	F8W038;Q8IXM2-2;Q8IXM2;Q8IXM2-3;F8W1H0;H0YIS7	F8W038;Q8IXM2-2;Q8IXM2;Q8IXM2-3;F8W1H0;H0YIS7	Chromatin complexes subunit BAP18	C17orf49;BAP18;RNASEK-C17orf49	tr|F8W038|F8W038_HUMAN Chromatin complexes subunit BAP18 OS=Homo sapiens GN=C17orf49 PE=4 SV=1;sp|Q8IXM2-2|BAP18_HUMAN Isoform 2 of Chromatin complexes subunit BAP18 OS=Homo sapiens GN=BAP18;sp|Q8IXM2|BAP18_HUMAN Chromatin complexes subunit BAP18 OS=Homo s	5242200	19024000	2696300	582460	2113800	10431000	24028000	3	3	3	28.7	28.7	28.7	16.29	0.0012655	2.7643	24266000	4	19.1	28.7	1	3	6	1	3	1	3	1	3
683	F8W0P7	F8W0P7		ATP5B	tr|F8W0P7|F8W0P7_HUMAN ATP synthase subunit beta, mitochondrial (Fragment) OS=Homo sapiens GN=ATP5B PE=1 SV=2	443770000	504170000	55761000	26104000	29657000	290510000	249320000	11	1	1	55.6	7	7	28.392	0	12.535	947940000	30	53.7	55.6	10	20	1	10	11	1	1	1	1
684	F8W0Q9;Q8NEY8-9;Q8NEY8-8;Q8NEY8-2;Q8NEY8;Q8NEY8-6;F8VPY7;F8VWU8;F8WF16;B7Z8L1;F8VRK2;Q8NEY8-5;F8VXV7;REV__K7EN69	F8W0Q9;Q8NEY8-9;Q8NEY8-8;Q8NEY8-2;Q8NEY8;Q8NEY8-6;F8VPY7;F8VWU8;F8WF16;B7Z8L1	Periphilin-1	PPHLN1	tr|F8W0Q9|F8W0Q9_HUMAN Periphilin-1 OS=Homo sapiens GN=PPHLN1 PE=1 SV=1;sp|Q8NEY8-9|PPHLN_HUMAN Isoform 9 of Periphilin-1 OS=Homo sapiens GN=PPHLN1;sp|Q8NEY8-8|PPHLN_HUMAN Isoform 8 of Periphilin-1 OS=Homo sapiens GN=PPHLN1;sp|Q8NEY8-2|PPHLN_HUMAN Isoform	240270000	89745000	10646000	7750500	2895000	227750000	206970000	6	6	3	16.9	16.9	10.1	44.682	0	10.587	330010000	9	16.9	4.4	6	3	14	6	2	6	2	3	0
685	F8W108;F8WCU9;Q68CP9-3;Q68CP9	F8W108;F8WCU9;Q68CP9-3;Q68CP9	AT-rich interactive domain-containing protein 2	ARID2	tr|F8W108|F8W108_HUMAN AT-rich interactive domain-containing protein 2 OS=Homo sapiens GN=ARID2 PE=1 SV=1;tr|F8WCU9|F8WCU9_HUMAN AT-rich interactive domain-containing protein 2 OS=Homo sapiens GN=ARID2 PE=1 SV=1;sp|Q68CP9-3|ARID2_HUMAN Isoform 2 of AT-rich	32324000	11353000	824100	609880	214210	31748000	0	2	2	2	4.5	4.5	4.5	153.12	0.001256	2.7186	43677000	2	2	2.5	1	1	4	1	1	1	1	1	1
686	F8W126;Q96EZ8-3;Q96EZ8;Q96EZ8-2;F8W0I9;F8VVA6;F8VP44;Q96EZ8-4	F8W126;Q96EZ8-3;Q96EZ8;Q96EZ8-2;F8W0I9;F8VVA6;F8VP44;Q96EZ8-4	Microspherule protein 1	MCRS1	tr|F8W126|F8W126_HUMAN Microspherule protein 1 (Fragment) OS=Homo sapiens GN=MCRS1 PE=1 SV=1;sp|Q96EZ8-3|MCRS1_HUMAN Isoform 3 of Microspherule protein 1 OS=Homo sapiens GN=MCRS1;sp|Q96EZ8|MCRS1_HUMAN Microspherule protein 1 OS=Homo sapiens GN=MCRS1 PE=1 S	7905400	0	376450	376450	0	7764600	0	2	2	2	9.7	9.7	9.7	35.683	0.00054333	3.6144	7905400	4	9.7	5.7	3	1	8	2	1	2	1	2	1
687	F8W150;S4R3U2;H0YIN8;Q6ZTN6-2;Q6ZTN6;Q8IZ07;Q6ZTN6-3	F8W150;S4R3U2;H0YIN8;Q6ZTN6-2;Q6ZTN6;Q8IZ07;Q6ZTN6-3	Ankyrin repeat domain-containing protein 13D;Ankyrin repeat domain-containing protein 13A	ANKRD13A;ANKRD13D	tr|F8W150|F8W150_HUMAN Ankyrin repeat domain-containing protein 13A (Fragment) OS=Homo sapiens GN=ANKRD13A PE=4 SV=1;tr|S4R3U2|S4R3U2_HUMAN Ankyrin repeat domain-containing protein 13A (Fragment) OS=Homo sapiens GN=ANKRD13A PE=4 SV=1;tr|H0YIN8|H0YIN8_HUMAN	0	0	0	0	0	0	0	1	1	1	14.5	14.5	14.5	9.3785	0.0029615	2.527	0	1	14.5	0	1	0	7	1	0	1	0	1	0
688	F8W1A4;P54819-2;P54819;P54819-3;P54819-5;F8VZG5;P54819-6;F8VY04;P54819-4;G3V213;F8VPP1	F8W1A4;P54819-2;P54819;P54819-3;P54819-5;F8VZG5;P54819-6;F8VY04;P54819-4;G3V213	Adenylate kinase 2, mitochondrial;Adenylate kinase 2, mitochondrial;Adenylate kinase 2, mitochondrial, N-terminally processed	AK2	tr|F8W1A4|F8W1A4_HUMAN Adenylate kinase 2, mitochondrial OS=Homo sapiens GN=AK2 PE=1 SV=1;sp|P54819-2|KAD2_HUMAN Isoform 2 of Adenylate kinase 2, mitochondrial OS=Homo sapiens GN=AK2;sp|P54819|KAD2_HUMAN Adenylate kinase 2, mitochondrial OS=Homo sapiens GN	3029900000	2586100000	351010000	189370000	161630000	2822100000	2629300000	14	14	14	76.7	76.7	76.7	25.63	0	323.31	5616100000	181	76.7	76.7	99	82	11	14	14	14	14	14	14
689	F8W1P7;P49281-5;P49281-2;P49281;P49281-3;P49281-4;F8VZL6;F8W154;F8W1C0;F8VWB0;F8W1F2	F8W1P7;P49281-5;P49281-2;P49281;P49281-3;P49281-4;F8VZL6;F8W154;F8W1C0;F8VWB0;F8W1F2	Natural resistance-associated macrophage protein 2	SLC11A2	tr|F8W1P7|F8W1P7_HUMAN Natural resistance-associated macrophage protein 2 OS=Homo sapiens GN=SLC11A2 PE=3 SV=1;sp|P49281-5|NRAM2_HUMAN Isoform 5 of Natural resistance-associated macrophage protein 2 OS=Homo sapiens GN=SLC11A2;sp|P49281-2|NRAM2_HUMAN Isofor	23291000	142310000	12739000	1791600	10947000	42534000	140880000	2	2	2	5.4	5.4	5.4	52.78	0.00057954	4.5633	165600000	9	2.3	5.4	3	6	11	1	2	1	2	1	2
690	F8W1R7;G3V1V0;P60660-2;P60660;J3KND3;G8JLA2;B7Z6Z4;G3V1Y7;F8VPF3;F8VZU9;F8W180;H0YI43;F8VXL3	F8W1R7;G3V1V0;P60660-2;P60660;J3KND3;G8JLA2;B7Z6Z4;G3V1Y7;F8VPF3;F8VZU9;F8W180	Myosin light polypeptide 6	MYL6	tr|F8W1R7|F8W1R7_HUMAN Myosin light polypeptide 6 OS=Homo sapiens GN=MYL6 PE=4 SV=1;tr|G3V1V0|G3V1V0_HUMAN Myosin light polypeptide 6 OS=Homo sapiens GN=MYL6 PE=4 SV=1;sp|P60660-2|MYL6_HUMAN Isoform Smooth muscle of Myosin light polypeptide 6 OS=Homo sapie	3473000000	2636100000	555380000	315730000	239650000	2210300000	2461500000	8	8	6	57.9	57.9	41.4	16.29	0	138.57	6109100000	102	57.9	49.7	54	48	13	8	7	8	7	6	5
691	F8W1U7;Q8N6T3;E5RHT6;F8VWH9;Q8N6T3-4;Q8N6T3-5;Q8N6T3-3;Q8N6T3-2;E5RHC5;E5RHH7	F8W1U7;Q8N6T3;E5RHT6;F8VWH9;Q8N6T3-4;Q8N6T3-5;Q8N6T3-3;Q8N6T3-2;E5RHC5	ADP-ribosylation factor GTPase-activating protein 1	ARFGAP1	tr|F8W1U7|F8W1U7_HUMAN ADP-ribosylation factor GTPase-activating protein 1 (Fragment) OS=Homo sapiens GN=ARFGAP1 PE=1 SV=1;sp|Q8N6T3|ARFG1_HUMAN ADP-ribosylation factor GTPase-activating protein 1 OS=Homo sapiens GN=ARFGAP1 PE=1 SV=2;tr|E5RHT6|E5RHT6_HUMAN	91153000	49295000	8778000	5697100	3081000	0	47982000	6	6	6	32.1	32.1	32.1	29.571	0	10.906	140450000	9	19.9	16.6	4	5	10	4	3	4	3	4	3
692	F8W6A0;Q8NEY8-3	F8W6A0;Q8NEY8-3	Periphilin-1	PPHLN1	tr|F8W6A0|F8W6A0_HUMAN Periphilin-1 OS=Homo sapiens GN=PPHLN1 PE=1 SV=1;sp|Q8NEY8-3|PPHLN_HUMAN Isoform 3 of Periphilin-1 OS=Homo sapiens GN=PPHLN1	35395000	16941000	2754500	1862900	891630	15490000	21750000	4	1	1	12.4	5.2	5.2	41.156	0	9.2739	52336000	5	12.4	9.9	3	2	2	4	3	1	1	1	1
693	F8W6G1;Q9UHY1;C9JHZ6	F8W6G1;Q9UHY1;C9JHZ6	Nuclear receptor-binding protein	NRBP1	tr|F8W6G1|F8W6G1_HUMAN Nuclear receptor-binding protein OS=Homo sapiens GN=NRBP1 PE=1 SV=1;sp|Q9UHY1|NRBP_HUMAN Nuclear receptor-binding protein OS=Homo sapiens GN=NRBP1 PE=1 SV=1;tr|C9JHZ6|C9JHZ6_HUMAN Nuclear receptor-binding protein (Fragment) OS=Homo s	17163000	5114300	1060800	817260	243540	14426000	8622500	2	2	2	5.7	5.7	5.7	60.829	0.0039216	2.4166	22277000	3	5.7	2.9	2	1	3	2	1	2	1	2	1
694	F8W6G5;Q7Z2E3-13;Q7Z2E3-3;Q7Z2E3-9;Q7Z2E3-11;Q7Z2E3-8;Q7Z2E3-7;Q7Z2E3;F8WBD6;E7EUY4;F8WBM3;Q6JV79;E7EVB7;C9J8U3;C9JZ40;Q7Z2E3-12;Q7Z2E3-5;Q7Z2E3-10	F8W6G5;Q7Z2E3-13;Q7Z2E3-3;Q7Z2E3-9;Q7Z2E3-11;Q7Z2E3-8;Q7Z2E3-7;Q7Z2E3;F8WBD6;E7EUY4;F8WBM3;Q6JV79;E7EVB7;C9J8U3;C9JZ40;Q7Z2E3-12;Q7Z2E3-5;Q7Z2E3-10	Aprataxin	APTX	tr|F8W6G5|F8W6G5_HUMAN Aprataxin (Fragment) OS=Homo sapiens GN=APTX PE=4 SV=1;sp|Q7Z2E3-13|APTX_HUMAN Isoform 13 of Aprataxin OS=Homo sapiens GN=APTX;sp|Q7Z2E3-3|APTX_HUMAN Isoform 3 of Aprataxin OS=Homo sapiens GN=APTX;sp|Q7Z2E3-9|APTX_HUMAN Isoform 9 of	6208800	34121000	3102300	477600	2624700	0	44147000	2	2	2	13.6	13.6	13.6	22.763	0.0010296	2.9432	40330000	2	5.6	13.6	1	1	18	1	2	1	2	1	2
695	F8W6I7;P09651-3;P09651-2;P09651;F8VZ49;Q32P51;F8VTQ5;F8W646;H0YH80;F8VYN5	F8W6I7;P09651-3;P09651-2;P09651;F8VZ49;Q32P51;F8VTQ5	Heterogeneous nuclear ribonucleoprotein A1;Heterogeneous nuclear ribonucleoprotein A1, N-terminally processed;Heterogeneous nuclear ribonucleoprotein A1-like 2	HNRNPA1;HNRNPA1L2	tr|F8W6I7|F8W6I7_HUMAN Heterogeneous nuclear ribonucleoprotein A1 OS=Homo sapiens GN=HNRNPA1 PE=1 SV=2;sp|P09651-3|ROA1_HUMAN Isoform 2 of Heterogeneous nuclear ribonucleoprotein A1 OS=Homo sapiens GN=HNRNPA1;sp|P09651-2|ROA1_HUMAN Isoform A1-A of Heteroge	21830000000	22325000000	2453000000	1212800000	1240300000	18802000000	18146000000	19	19	19	58.3	58.3	58.3	33.155	0	323.31	44154000000	916	58.3	55	378	538	10	19	17	19	17	19	17
696	F8W6M3;Q9NYG2;Q9NYG2-2	F8W6M3;Q9NYG2;Q9NYG2-2	Palmitoyltransferase;Palmitoyltransferase ZDHHC3	ZDHHC3	tr|F8W6M3|F8W6M3_HUMAN Palmitoyltransferase OS=Homo sapiens GN=ZDHHC3 PE=1 SV=1;sp|Q9NYG2|ZDHC3_HUMAN Palmitoyltransferase ZDHHC3 OS=Homo sapiens GN=ZDHHC3 PE=1 SV=2;sp|Q9NYG2-2|ZDHC3_HUMAN Isoform 2 of Palmitoyltransferase ZDHHC3 OS=Homo sapiens GN=ZDHHC3	27412000	34183000	4399600	1958000	2441600	36579000	44002000	1	1	1	4.8	4.8	4.8	37.864	0.0024783	2.5729	61595000	6	4.8	4.8	2	4	3	1	1	1	1	1	1
697	F8W726;Q14157-4;Q14157-1;Q14157-3;Q14157;Q14157-5;Q5VU77;H0Y5H6;H7C2T8	F8W726;Q14157-4;Q14157-1;Q14157-3;Q14157;Q14157-5	Ubiquitin-associated protein 2-like	UBAP2L	tr|F8W726|F8W726_HUMAN Ubiquitin-associated protein 2-like OS=Homo sapiens GN=UBAP2L PE=1 SV=2;sp|Q14157-4|UBP2L_HUMAN Isoform 4 of Ubiquitin-associated protein 2-like OS=Homo sapiens GN=UBAP2L;sp|Q14157-1|UBP2L_HUMAN Isoform 2 of Ubiquitin-associated prot	15015000	28807000	1413600	484350	929270	22016000	26286000	5	5	5	7.5	7.5	7.5	113.63	0	12.854	43822000	10	6.2	4.1	7	3	9	4	3	4	3	4	3
698	F8W733;Q9NXR7-4;Q9NXR7-3;Q9NXR7;Q9NXR7-1;C9J2G0;A0A075B7D2	F8W733;Q9NXR7-4;Q9NXR7-3;Q9NXR7;Q9NXR7-1;C9J2G0;A0A075B7D2	BRCA1-A complex subunit BRE	BRE	tr|F8W733|F8W733_HUMAN BRCA1-A complex subunit BRE (Fragment) OS=Homo sapiens GN=BRE PE=1 SV=1;sp|Q9NXR7-4|BRE_HUMAN Isoform 4 of BRCA1-A complex subunit BRE OS=Homo sapiens GN=BRE;sp|Q9NXR7-3|BRE_HUMAN Isoform 3 of BRCA1-A complex subunit BRE OS=Homo sapi	20978000	5823600	2061700	1613700	447970	13319000	0	2	2	2	9.5	9.5	9.5	31.972	0.00057045	4.296	26802000	2	4.9	4.6	1	1	7	1	1	1	1	1	1
699	F8W7C6;A0A087WV22;H7C123;H7C2C5;H7C2U2	F8W7C6;A0A087WV22;H7C123;H7C2C5		RPL10	tr|F8W7C6|F8W7C6_HUMAN 60S ribosomal protein L10 OS=Homo sapiens GN=RPL10 PE=1 SV=2;tr|A0A087WV22|A0A087WV22_HUMAN 60S ribosomal protein L10 OS=Homo sapiens GN=RPL10 PE=1 SV=1;tr|H7C123|H7C123_HUMAN 60S ribosomal protein L10 (Fragment) OS=Homo sapiens GN=R	32081000	28810000	6089100	3208100	2881000	32081000	27639000	12	1	1	65	11	11	18.565	0	58.311	60891000	6	55.8	65	3	3	5	9	12	1	1	1	1
700	F8W7Q4;Q96A26;E9PH05	F8W7Q4;Q96A26;E9PH05	Protein FAM162A	FAM162A	tr|F8W7Q4|F8W7Q4_HUMAN Protein FAM162A OS=Homo sapiens GN=FAM162A PE=1 SV=1;sp|Q96A26|F162A_HUMAN Protein FAM162A OS=Homo sapiens GN=FAM162A PE=1 SV=2;tr|E9PH05|E9PH05_HUMAN Protein FAM162A OS=Homo sapiens GN=FAM162A PE=1 SV=1	3957200000	2956400000	768180000	439690000	328490000	3596000000	2864200000	6	6	6	34	34	34	16.515	0	182.36	6913600000	82	34	34	41	41	3	6	6	6	6	6	6
701	F8W7R3;Q9NVI1-2;Q9NVI1-1;Q9NVI1;H3BP78;H3BQE2;H3BT54;H3BMG4;Q9NVI1-4	F8W7R3;Q9NVI1-2;Q9NVI1-1;Q9NVI1;H3BP78	Fanconi anemia group I protein	FANCI	tr|F8W7R3|F8W7R3_HUMAN Fanconi anemia group I protein OS=Homo sapiens GN=FANCI PE=1 SV=1;sp|Q9NVI1-2|FANCI_HUMAN Isoform 2 of Fanconi anemia group I protein OS=Homo sapiens GN=FANCI;sp|Q9NVI1-1|FANCI_HUMAN Isoform 1 of Fanconi anemia group I protein OS=Hom	370510000	226590000	8530100	5293000	3237100	372020000	225240000	3	3	3	4.2	4.2	4.2	123.24	0.00030084	5.3808	597110000	6	4.2	1.2	5	1	9	3	1	3	1	3	1
702	F8W7W8;Q30201-6;Q30201-7;Q30201-2;Q30201-8;Q30201-5;Q30201	F8W7W8;Q30201-6;Q30201-7;Q30201-2;Q30201-8;Q30201-5;Q30201	Hereditary hemochromatosis protein	HFE	tr|F8W7W8|F8W7W8_HUMAN Hereditary hemochromatosis protein OS=Homo sapiens GN=HFE PE=3 SV=1;sp|Q30201-6|HFE_HUMAN Isoform 6 of Hereditary hemochromatosis protein OS=Homo sapiens GN=HFE;sp|Q30201-7|HFE_HUMAN Isoform 7 of Hereditary hemochromatosis protein OS	7796900	0	649740	649740	0	11299000	0	1	1	1	3.9	3.9	3.9	38.871	0.0043796	2.3304	7796900	1	3.9	0	1	0	7	1	0	1	0	1	0
703	F8W8D8;P13797-3;P13797-2;P13797;H7C4N2;P13796	F8W8D8;P13797-3;P13797-2;P13797	Plastin-3	PLS3	tr|F8W8D8|F8W8D8_HUMAN Plastin-3 OS=Homo sapiens GN=PLS3 PE=1 SV=1;sp|P13797-3|PLST_HUMAN Isoform 3 of Plastin-3 OS=Homo sapiens GN=PLS3;sp|P13797-2|PLST_HUMAN Isoform 2 of Plastin-3 OS=Homo sapiens GN=PLS3;sp|P13797|PLST_HUMAN Plastin-3 OS=Homo sapiens GN	57805000	34517000	2429500	1521200	908350	45821000	36569000	5	5	3	12.1	12.1	8.2	66.636	0	9.4849	92322000	5	12.1	6.7	3	2	6	5	2	5	2	3	1
704	Q5JVV3;F8W8M4;Q5T6N4;O14639-3;O14639-5;O14639-2;O14639-6;O14639;J3QSX6;O14639-4;H0Y3K7;H0Y7N6;F6XFR5	Q5JVV3;F8W8M4;Q5T6N4;O14639-3;O14639-5;O14639-2;O14639-6;O14639;J3QSX6;O14639-4;H0Y3K7	Actin-binding LIM protein 1	ABLIM1	tr|Q5JVV3|Q5JVV3_HUMAN Actin-binding LIM protein 1 OS=Homo sapiens GN=ABLIM1 PE=1 SV=1;tr|F8W8M4|F8W8M4_HUMAN Actin-binding LIM protein 1 OS=Homo sapiens GN=ABLIM1 PE=1 SV=1;tr|Q5T6N4|Q5T6N4_HUMAN Actin-binding LIM protein 1 OS=Homo sapiens GN=ABLIM1 PE=1	187410000	130230000	8358900	4931900	3427100	185630000	134280000	11	11	11	33.6	33.6	33.6	60.497	0	52.046	317640000	19	22.1	18.9	10	9	13	7	6	7	6	7	6
705	J3KQ45;F8W8W7;O43493-2;O43493-5;O43493-3;O43493;O43493-4;O43493-6	J3KQ45;F8W8W7;O43493-2;O43493-5;O43493-3;O43493;O43493-4;O43493-6	Trans-Golgi network integral membrane protein 2	TGOLN2	tr|J3KQ45|J3KQ45_HUMAN Trans-Golgi network integral membrane protein 2 OS=Homo sapiens GN=TGOLN2 PE=1 SV=1;tr|F8W8W7|F8W8W7_HUMAN Trans-Golgi network integral membrane protein 2 OS=Homo sapiens GN=TGOLN2 PE=1 SV=2;sp|O43493-2|TGON2_HUMAN Isoform TGN46 of T	372070000	269220000	22114000	12830000	9283500	365300000	296630000	7	7	7	21.8	21.8	21.8	47.879	0	46.22	641300000	18	21.8	15	10	8	8	7	5	7	5	7	5
706	F8W930;Q9Y6M1-1;Q9Y6M1;Q9Y6M1-5;Q9Y6M1-6;Q9Y6M1-3;Q9Y6M1-4	F8W930;Q9Y6M1-1;Q9Y6M1;Q9Y6M1-5;Q9Y6M1-6;Q9Y6M1-3;Q9Y6M1-4	Insulin-like growth factor 2 mRNA-binding protein 2	IGF2BP2	tr|F8W930|F8W930_HUMAN Insulin-like growth factor 2 mRNA-binding protein 2 OS=Homo sapiens GN=IGF2BP2 PE=1 SV=1;sp|Q9Y6M1-1|IF2B2_HUMAN Isoform 2 of Insulin-like growth factor 2 mRNA-binding protein 2 OS=Homo sapiens GN=IGF2BP2;sp|Q9Y6M1|IF2B2_HUMAN Insuli	976690000	599990000	46373000	28726000	17647000	856240000	558510000	14	13	13	28.4	26.3	26.3	66.785	0	210.52	1576700000	43	27.1	21.5	24	19	7	13	10	12	9	12	9
707	F8W9E7;Q96BJ8-2;Q96BJ8;Q96BJ8-3	F8W9E7;Q96BJ8-2;Q96BJ8;Q96BJ8-3	Engulfment and cell motility protein 3	ELMO3	tr|F8W9E7|F8W9E7_HUMAN Engulfment and cell motility protein 3 OS=Homo sapiens GN=ELMO3 PE=4 SV=1;sp|Q96BJ8-2|ELMO3_HUMAN Isoform 1 of Engulfment and cell motility protein 3 OS=Homo sapiens GN=ELMO3;sp|Q96BJ8|ELMO3_HUMAN Engulfment and cell motility protein	0	121390000	2823000	0	2823000	0	89365000	1	1	1	2	2	2	85.332	1	-2	121390000	1	0	2	0	1	4	0	1	0	1	0	1
708	F8W9F8;Q9NQ94-3;Q9NQ94-2;Q9NQ94-4;Q9NQ94;Q9NQ94-6;Q9NQ94-5;Q5T0W7;D6RBS9;D6R9D6;B7Z8Z7;Q8TBY0-2;Q8TBY0-3;A0AV96-2;Q8TBY0;A0AV96	F8W9F8;Q9NQ94-3;Q9NQ94-2;Q9NQ94-4;Q9NQ94;Q9NQ94-6;Q9NQ94-5;Q5T0W7	APOBEC1 complementation factor	A1CF	tr|F8W9F8|F8W9F8_HUMAN APOBEC1 complementation factor OS=Homo sapiens GN=A1CF PE=4 SV=2;sp|Q9NQ94-3|A1CF_HUMAN Isoform 3 of APOBEC1 complementation factor OS=Homo sapiens GN=A1CF;sp|Q9NQ94-2|A1CF_HUMAN Isoform 2 of APOBEC1 complementation factor OS=Homo sa	647390000	462430000	34682000	20231000	14451000	474870000	579940000	15	15	15	33.2	33.2	33.2	65.97	0	54.96	1109800000	47	33.2	25.9	25	22	16	15	10	15	10	15	10
709	F8W9Q8;G3V426;Q86TW2-2;Q86TW2;Q86TW2-3	F8W9Q8;G3V426;Q86TW2-2;Q86TW2;Q86TW2-3	Uncharacterized aarF domain-containing protein kinase 1	ADCK1	tr|F8W9Q8|F8W9Q8_HUMAN Uncharacterized aarF domain-containing protein kinase 1 OS=Homo sapiens GN=ADCK1 PE=4 SV=1;tr|G3V426|G3V426_HUMAN Uncharacterized aarF domain-containing protein kinase 1 (Fragment) OS=Homo sapiens GN=ADCK1 PE=4 SV=3;sp|Q86TW2-2|ADCK1	0	13882000	1067900	0	1067900	0	15084000	2	2	2	12.8	12.8	12.8	24.776	0.0034398	2.4488	13882000	1	0	12.8	0	1	5	0	2	0	2	0	2
710	F8W9S7;Q14C86-3;Q14C86-4;Q14C86-5;Q14C86-2;Q14C86;Q14C86-6;B0QZ65;B4DGD8;H0Y4E7;H0Y7I9;C9IZ08	F8W9S7;Q14C86-3;Q14C86-4;Q14C86-5;Q14C86-2;Q14C86;Q14C86-6;B0QZ65;B4DGD8;H0Y4E7;H0Y7I9;C9IZ08	GTPase-activating protein and VPS9 domain-containing protein 1	GAPVD1	tr|F8W9S7|F8W9S7_HUMAN GTPase-activating protein and VPS9 domain-containing protein 1 OS=Homo sapiens GN=GAPVD1 PE=1 SV=1;sp|Q14C86-3|GAPD1_HUMAN Isoform 3 of GTPase-activating protein and VPS9 domain-containing protein 1 OS=Homo sapiens GN=GAPVD1;sp|Q14C8	204250000	109870000	4619400	3003700	1615700	258380000	181130000	2	2	2	1.7	1.7	1.7	157.46	0	11.522	314120000	6	1.7	1.7	4	2	12	2	2	2	2	2	2
711	F8WAB8;Q70HW3-2;Q70HW3;H0YCZ5;H7C430;H0YF50;Q70HW3-3	F8WAB8;Q70HW3-2;Q70HW3;H0YCZ5;H7C430	S-adenosylmethionine mitochondrial carrier protein	SLC25A26	tr|F8WAB8|F8WAB8_HUMAN S-adenosylmethionine mitochondrial carrier protein OS=Homo sapiens GN=SLC25A26 PE=3 SV=1;sp|Q70HW3-2|SAMC_HUMAN Isoform 2 of S-adenosylmethionine mitochondrial carrier protein OS=Homo sapiens GN=SLC25A26;sp|Q70HW3|SAMC_HUMAN S-adenos	79514000	6880400	6645700	6116400	529260	11620000	21414000	3	3	3	16.8	16.8	16.8	29.353	0	8.234	86394000	6	16.8	5.1	5	1	7	3	1	3	1	3	1
712	F8WAJ0;Q9H8H2;Q9H8H2-4;Q9H8H2-2;Q9H8H2-3	F8WAJ0;Q9H8H2;Q9H8H2-4;Q9H8H2-2	Probable ATP-dependent RNA helicase DDX31	DDX31	tr|F8WAJ0|F8WAJ0_HUMAN Probable ATP-dependent RNA helicase DDX31 OS=Homo sapiens GN=DDX31 PE=1 SV=2;sp|Q9H8H2|DDX31_HUMAN Probable ATP-dependent RNA helicase DDX31 OS=Homo sapiens GN=DDX31 PE=1 SV=2;sp|Q9H8H2-4|DDX31_HUMAN Isoform 4 of Probable ATP-depende	112890000	149470000	5703600	2454200	3249400	156980000	196480000	7	7	7	16.5	16.5	16.5	83.515	0	15.803	262370000	9	12.7	11.3	5	4	5	5	5	5	5	5	5
713	F8WF27;F8WBG6;Q8NE91;P30408	F8WF27;F8WBG6;Q8NE91;P30408	Transmembrane 4 L6 family member 1	TM4SF1	tr|F8WF27|F8WF27_HUMAN Transmembrane 4 L6 family member 1 OS=Homo sapiens GN=TM4SF1 PE=1 SV=1;tr|F8WBG6|F8WBG6_HUMAN Transmembrane 4 L6 family member 1 OS=Homo sapiens GN=TM4SF1 PE=1 SV=1;tr|Q8NE91|Q8NE91_HUMAN TM4SF1 protein OS=Homo sapiens GN=TM4SF1 PE=1	273460000	353270000	208910000	91153000	117760000	279960000	332100000	1	1	1	8.9	8.9	8.9	10.989	0.0005767	4.5018	626730000	6	8.9	8.9	5	1	4	1	1	1	1	1	1
714	F8WCD0;Q8NC42	F8WCD0;Q8NC42	E3 ubiquitin-protein ligase RNF149	RNF149	tr|F8WCD0|F8WCD0_HUMAN E3 ubiquitin-protein ligase RNF149 OS=Homo sapiens GN=RNF149 PE=4 SV=1;sp|Q8NC42|RN149_HUMAN E3 ubiquitin-protein ligase RNF149 OS=Homo sapiens GN=RNF149 PE=2 SV=2	42070000	5463300	2376600	2103500	273170	23482000	17032000	4	4	4	16.1	16.1	16.1	43.061	0.00031211	6.1741	47533000	6	16.1	2.8	5	1	2	4	1	4	1	4	1
715	F8WCF6;P59998;P59998-3;R4GN08;F8WDD7;H7C0A3;P59998-4;P59998-2	F8WCF6;P59998;P59998-3;R4GN08;F8WDD7;H7C0A3;P59998-4;P59998-2	Actin-related protein 2/3 complex subunit 4	ARPC4-TTLL3;ARPC4	tr|F8WCF6|F8WCF6_HUMAN Protein ARPC4-TTLL3 OS=Homo sapiens GN=ARPC4-TTLL3 PE=4 SV=1;sp|P59998|ARPC4_HUMAN Actin-related protein 2/3 complex subunit 4 OS=Homo sapiens GN=ARPC4 PE=1 SV=3;sp|P59998-3|ARPC4_HUMAN Isoform 3 of Actin-related protein 2/3 complex	299130000	217730000	34457000	19942000	14515000	271470000	239440000	5	5	5	33.1	33.1	33.1	21.058	0	21.122	516860000	18	33.1	21	10	8	8	5	4	5	4	5	4
716	F8WD26;J3KP06;Q8WWI1;E9PMT2;Q8WWI1-4;Q8WWI1-2;Q8WWI1-5;H0Y424	F8WD26;J3KP06;Q8WWI1;E9PMT2;Q8WWI1-4;Q8WWI1-2;Q8WWI1-5;H0Y424	LIM domain only protein 7	LMO7	tr|F8WD26|F8WD26_HUMAN LIM domain only protein 7 OS=Homo sapiens GN=LMO7 PE=1 SV=2;tr|J3KP06|J3KP06_HUMAN LIM domain only protein 7 OS=Homo sapiens GN=LMO7 PE=1 SV=2;sp|Q8WWI1|LMO7_HUMAN LIM domain only protein 7 OS=Homo sapiens GN=LMO7 PE=1 SV=3;tr|E9PMT2	0	80404000	737650	0	737650	0	105280000	33	1	1	29.9	0.4	0.4	186.18	1	-2	80404000	1	27.6	22.9	0	1	8	29	26	0	1	0	1
717	F8WD88;P49450-2;P49450	F8WD88;P49450-2;P49450	Histone H3-like centromeric protein A	CENPA	tr|F8WD88|F8WD88_HUMAN Histone H3-like centromeric protein A OS=Homo sapiens GN=CENPA PE=1 SV=1;sp|P49450-2|CENPA_HUMAN Isoform 2 of Histone H3-like centromeric protein A OS=Homo sapiens GN=CENPA;sp|P49450|CENPA_HUMAN Histone H3-like centromeric protein A	74483000	41165000	28912000	18621000	10291000	78704000	57767000	2	2	2	23.3	23.3	23.3	9.9154	0.0067179	2.1608	115650000	5	23.3	23.3	3	2	3	2	2	2	2	2	2
718	F8WDV0;Q9UI26;Q9UI26-2	F8WDV0;Q9UI26;Q9UI26-2	Importin-11	IPO11	tr|F8WDV0|F8WDV0_HUMAN Importin-11 OS=Homo sapiens GN=IPO11 PE=1 SV=1;sp|Q9UI26|IPO11_HUMAN Importin-11 OS=Homo sapiens GN=IPO11 PE=1 SV=1;sp|Q9UI26-2|IPO11_HUMAN Isoform 2 of Importin-11 OS=Homo sapiens GN=IPO11	2709100	46076000	1134500	63003	1071500	3925900	0	2	2	2	3.1	3.1	3.1	99.707	0.0010272	2.9206	48785000	1	1.5	1.6	1	0	3	1	1	1	1	1	1
719	F8WF48;Q99442;F8WCJ7	F8WF48;Q99442;F8WCJ7	Translocation protein SEC62	SEC62	tr|F8WF48|F8WF48_HUMAN Translocation protein SEC62 OS=Homo sapiens GN=SEC62 PE=1 SV=1;sp|Q99442|SEC62_HUMAN Translocation protein SEC62 OS=Homo sapiens GN=SEC62 PE=1 SV=1;tr|F8WCJ7|F8WCJ7_HUMAN Translocation protein SEC62 OS=Homo sapiens GN=SEC62 PE=1 SV=1	296020000	216230000	73178000	42288000	30890000	268220000	209860000	3	3	3	34.1	34.1	34.1	9.8703	0	11.426	512250000	12	34.1	34.1	6	6	3	3	3	3	3	3	3
720	F8WF86;Q8TBC4-2;Q8TBC4	F8WF86;Q8TBC4-2;Q8TBC4	NEDD8-activating enzyme E1 catalytic subunit	UBA3	tr|F8WF86|F8WF86_HUMAN NEDD8-activating enzyme E1 catalytic subunit OS=Homo sapiens GN=UBA3 PE=1 SV=1;sp|Q8TBC4-2|UBA3_HUMAN Isoform 2 of NEDD8-activating enzyme E1 catalytic subunit OS=Homo sapiens GN=UBA3;sp|Q8TBC4|UBA3_HUMAN NEDD8-activating enzyme E1 c	13639000	0	1948500	1948500	0	13396000	0	1	1	1	18.6	18.6	18.6	14.657	0.0067114	2.1546	13639000	1	18.6	0	1	0	3	1	0	1	0	1	0
721	F8WJN3;Q16630-3;Q16630;Q16630-2;F8W084	F8WJN3;Q16630-3;Q16630;Q16630-2	Cleavage and polyadenylation specificity factor subunit 6	CPSF6	tr|F8WJN3|F8WJN3_HUMAN Cleavage and polyadenylation-specificity factor subunit 6 OS=Homo sapiens GN=CPSF6 PE=1 SV=1;sp|Q16630-3|CPSF6_HUMAN Isoform 3 of Cleavage and polyadenylation specificity factor subunit 6 OS=Homo sapiens GN=CPSF6;sp|Q16630|CPSF6_HUMA	1070000000	1531600000	130080000	53498000	76578000	1061400000	1276500000	10	10	10	27.8	27.8	27.8	52.269	0	245.92	2601500000	62	27.8	25.5	31	31	5	10	8	10	8	10	8
722	G0XQ39;Q13586;E9PNJ4;Q13586-2;H0YDB2;E9PIQ8;E9PRZ7;E9PR09;E9PN27;E9PRE4;E9PR07;E9PJ19;E9PMB4;H7C5K2	G0XQ39;Q13586;E9PNJ4;Q13586-2;H0YDB2	Stromal interaction molecule 1	STIM1	tr|G0XQ39|G0XQ39_HUMAN STIM1L OS=Homo sapiens GN=STIM1 PE=1 SV=1;sp|Q13586|STIM1_HUMAN Stromal interaction molecule 1 OS=Homo sapiens GN=STIM1 PE=1 SV=3;tr|E9PNJ4|E9PNJ4_HUMAN Stromal interaction molecule 1 OS=Homo sapiens GN=STIM1 PE=1 SV=1;sp|Q13586-2|ST	975230000	753070000	45482000	25664000	19818000	820390000	792620000	17	17	16	25.7	25.7	23.6	88.645	0	122.39	1728300000	62	21	21.5	31	31	14	15	13	15	13	15	12
723	G3V0I5;P49821-2;P49821;B4DE93;E9PMX3;E9PQP1;E9PLC6;E9PPR0;E9PJL9;H0YE81;E9PPS5;E9PPD6;H0YD04	G3V0I5;P49821-2;P49821;B4DE93	NADH dehydrogenase [ubiquinone] flavoprotein 1, mitochondrial	NDUFV1	tr|G3V0I5|G3V0I5_HUMAN NADH dehydrogenase (Ubiquinone) flavoprotein 1, 51kDa, isoform CRA_c OS=Homo sapiens GN=NDUFV1 PE=1 SV=1;sp|P49821-2|NDUV1_HUMAN Isoform 2 of NADH dehydrogenase [ubiquinone] flavoprotein 1, mitochondrial OS=Homo sapiens GN=NDUFV1;sp|	4654600000	2482700000	264340000	172390000	91951000	3034700000	2790300000	24	24	24	63.9	63.9	63.9	50.054	0	323.31	7137300000	175	63.9	57.5	90	85	13	24	19	24	19	24	19
724	G3V126;Q9UI12-2;Q9UI12	G3V126;Q9UI12-2;Q9UI12	V-type proton ATPase subunit H	ATP6V1H	tr|G3V126|G3V126_HUMAN ATPase, H+ transporting, lysosomal 50/57kDa, V1 subunit H, isoform CRA_c OS=Homo sapiens GN=ATP6V1H PE=1 SV=1;sp|Q9UI12-2|VATH_HUMAN Isoform 2 of V-type proton ATPase subunit H OS=Homo sapiens GN=ATP6V1H;sp|Q9UI12|VATH_HUMAN V-type p	92006000	56975000	5730000	3538700	2191300	95498000	51569000	4	4	4	7.4	7.4	7.4	51.57	0	7.8594	148980000	9	7.4	7.2	4	5	3	4	3	4	3	4	3
725	G3V150;O94766-2;O94766;E9PNA1	G3V150;O94766-2;O94766;E9PNA1	Galactosylgalactosylxylosylprotein 3-beta-glucuronosyltransferase 3	B3GAT3	tr|G3V150|G3V150_HUMAN Beta-1,3-glucuronyltransferase 3 (Glucuronosyltransferase I), isoform CRA_a OS=Homo sapiens GN=B3GAT3 PE=1 SV=1;sp|O94766-2|B3GA3_HUMAN Isoform 2 of Galactosylgalactosylxylosylprotein 3-beta-glucuronosyltransferase 3 OS=Homo sapiens	378470000	272820000	36183000	21026000	15157000	413940000	342020000	5	5	5	22.3	22.3	22.3	34.963	0	46.074	651290000	24	22.3	20.4	12	12	4	5	4	5	4	5	4
726	G3V158;Q9Y315;E9PMH9;E9PML7;E9PPM8	G3V158;Q9Y315;E9PMH9;E9PML7;E9PPM8	Deoxyribose-phosphate aldolase	DERA	tr|G3V158|G3V158_HUMAN 2-deoxyribose-5-phosphate aldolase homolog (C. elegans), isoform CRA_a OS=Homo sapiens GN=DERA PE=1 SV=1;sp|Q9Y315|DEOC_HUMAN Deoxyribose-phosphate aldolase OS=Homo sapiens GN=DERA PE=1 SV=2;tr|E9PMH9|E9PMH9_HUMAN Putative deoxyribos	29664000	0	1977600	1977600	0	36787000	0	2	2	2	12.2	12.2	12.2	25.113	0.00057225	4.3605	29664000	1	12.2	0	1	0	5	2	0	2	0	2	0
727	G3V167;Q9UGN5-2;Q9UGN5;H0YH02	G3V167;Q9UGN5-2;Q9UGN5;H0YH02	Poly [ADP-ribose] polymerase 2	PARP2	tr|G3V167|G3V167_HUMAN Poly (ADP-ribose) polymerase family, member 2, isoform CRA_a OS=Homo sapiens GN=PARP2 PE=1 SV=1;sp|Q9UGN5-2|PARP2_HUMAN Isoform 2 of Poly [ADP-ribose] polymerase 2 OS=Homo sapiens GN=PARP2;sp|Q9UGN5|PARP2_HUMAN Poly [ADP-ribose] poly	85264000	98006000	4953200	2304400	2648800	129160000	134500000	3	3	3	8.5	8.5	8.5	60.214	0.00032404	7.2506	183270000	7	8.5	5.6	4	3	4	3	2	3	2	3	2
728	G3V1D3;G3V180;Q9NY33-4;Q9NY33;E9PQ14;E9PNX5;E9PKK8;E9PPK9;Q9NY33-2	G3V1D3;G3V180;Q9NY33-4;Q9NY33;E9PQ14	Dipeptidyl peptidase 3	DPP3	tr|G3V1D3|G3V1D3_HUMAN Dipeptidyl peptidase 3 OS=Homo sapiens GN=DPP3 PE=1 SV=1;tr|G3V180|G3V180_HUMAN Dipeptidyl peptidase 3 OS=Homo sapiens GN=DPP3 PE=1 SV=1;sp|Q9NY33-4|DPP3_HUMAN Isoform 4 of Dipeptidyl peptidase 3 OS=Homo sapiens GN=DPP3;sp|Q9NY33|DPP	105960000	27354000	3100400	2464300	636130	48471000	54032000	4	4	4	8.6	8.6	8.6	84.304	0	16.807	133320000	5	8.6	4.4	4	1	9	4	2	4	2	4	2
729	G3V1C3;Q9BZZ5-3;Q9BZZ5-2;Q9BZZ5;Q9BZZ5-1;Q9BZZ5-5;B4E283;H0YER7;E9PQK6	G3V1C3;Q9BZZ5-3;Q9BZZ5-2;Q9BZZ5;Q9BZZ5-1;Q9BZZ5-5;B4E283;H0YER7	Apoptosis inhibitor 5	API5	tr|G3V1C3|G3V1C3_HUMAN Apoptosis inhibitor 5 OS=Homo sapiens GN=API5 PE=1 SV=1;sp|Q9BZZ5-3|API5_HUMAN Isoform 3 of Apoptosis inhibitor 5 OS=Homo sapiens GN=API5;sp|Q9BZZ5-2|API5_HUMAN Isoform 2 of Apoptosis inhibitor 5 OS=Homo sapiens GN=API5;sp|Q9BZZ5|API	412890000	304770000	21107000	12144000	8963700	402490000	233530000	7	7	7	17.5	17.5	17.5	57.56	0	97.838	717650000	36	15.3	14.5	19	17	9	6	6	6	6	6	6
730	G3V1P5;Q96RN5-3;Q96RN5-2;Q96RN5	G3V1P5;Q96RN5-3;Q96RN5-2;Q96RN5	Mediator of RNA polymerase II transcription subunit 15	MED15	tr|G3V1P5|G3V1P5_HUMAN Mediator of RNA polymerase II transcription subunit 15 OS=Homo sapiens GN=MED15 PE=1 SV=1;sp|Q96RN5-3|MED15_HUMAN Isoform 3 of Mediator of RNA polymerase II transcription subunit 15 OS=Homo sapiens GN=MED15;sp|Q96RN5-2|MED15_HUMAN Is	0	0	0	0	0	0	0	1	1	1	2.4	2.4	2.4	79.599	0.0010246	2.9031	0	1	2.4	0	1	0	4	1	0	1	0	1	0
731	G3V5S9;G3V1S4;Q9Y324;G3V2M5	G3V5S9;G3V1S4;Q9Y324;G3V2M5	rRNA-processing protein FCF1 homolog	FCF1	tr|G3V5S9|G3V5S9_HUMAN rRNA-processing protein FCF1 homolog OS=Homo sapiens GN=FCF1 PE=4 SV=1;tr|G3V1S4|G3V1S4_HUMAN Chromosome 14 open reading frame 111, isoform CRA_a OS=Homo sapiens GN=FCF1 PE=4 SV=1;sp|Q9Y324|FCF1_HUMAN rRNA-processing protein FCF1 hom	96598000	138120000	29339000	12075000	17264000	117120000	125300000	4	4	4	23	23	23	21.491	0	11.575	234710000	12	16.9	23	6	6	4	3	4	3	4	3	4
732	G3V264;G3V2M1;G3V5Q9;P05154;G3V482;G3V265	G3V264;G3V2M1;G3V5Q9;P05154;G3V482;G3V265	Plasma serine protease inhibitor	SERPINA5	tr|G3V264|G3V264_HUMAN Plasma serine protease inhibitor (Fragment) OS=Homo sapiens GN=SERPINA5 PE=4 SV=1;tr|G3V2M1|G3V2M1_HUMAN Plasma serine protease inhibitor (Fragment) OS=Homo sapiens GN=SERPINA5 PE=3 SV=1;tr|G3V5Q9|G3V5Q9_HUMAN Plasma serine protease	0	17966000	2245800	0	2245800	0	20677000	2	2	2	15.1	15.1	15.1	19.014	0.00031153	6.1239	17966000	2	7.6	15.1	1	1	6	1	2	1	2	1	2
733	G3V2F7;I3L0A0;Q13404;Q13404-7;Q13404-2;Q13404-1;E5RIF1;D6RG00;G3V113;H0YBX6;Q13404-6;Q13404-8;Q15819	G3V2F7;I3L0A0;Q13404;Q13404-7;Q13404-2;Q13404-1;E5RIF1;D6RG00;G3V113;H0YBX6;Q13404-6;Q13404-8;Q15819	Ubiquitin-conjugating enzyme E2 variant 1;Ubiquitin-conjugating enzyme E2 variant 2	UBE2V1;TMEM189-UBE2V1;UBE2V2	tr|G3V2F7|G3V2F7_HUMAN Ubiquitin-conjugating enzyme E2 variant 1 OS=Homo sapiens GN=UBE2V1 PE=4 SV=2;tr|I3L0A0|I3L0A0_HUMAN HCG2044781 OS=Homo sapiens GN=TMEM189-UBE2V1 PE=4 SV=1;sp|Q13404|UB2V1_HUMAN Ubiquitin-conjugating enzyme E2 variant 1 OS=Homo sapie	0	0	0	0	0	0	0	2	2	2	18.1	18.1	18.1	12.019	0.0050909	2.2766	0	2	0	18.1	0	2	13	0	2	0	2	0	2
734	G3V576;G3V2Q1;P07910;G3V555;G3V575	G3V576;G3V2Q1;P07910;G3V555;G3V575	Heterogeneous nuclear ribonucleoproteins C1/C2	HNRNPC	tr|G3V576|G3V576_HUMAN Heterogeneous nuclear ribonucleoproteins C1/C2 OS=Homo sapiens GN=HNRNPC PE=1 SV=1;tr|G3V2Q1|G3V2Q1_HUMAN Heterogeneous nuclear ribonucleoproteins C1/C2 OS=Homo sapiens GN=HNRNPC PE=1 SV=1;sp|P07910|HNRPC_HUMAN Heterogeneous nuclear	201620000	343200000	34051000	12601000	21450000	81745000	29780000	13	1	1	55	13.4	13.4	25.256	0	48.1	544820000	135	55	55	50	85	5	13	13	1	1	1	1
735	G3V2S6;Q9Y5K8;G3V2V6;H0YJH8;H0YJ55;H0YJS0;G3V559	G3V2S6;Q9Y5K8;G3V2V6;H0YJH8	V-type proton ATPase subunit D	ATP6V1D	tr|G3V2S6|G3V2S6_HUMAN V-type proton ATPase subunit D OS=Homo sapiens GN=ATP6V1D PE=1 SV=1;sp|Q9Y5K8|VATD_HUMAN V-type proton ATPase subunit D OS=Homo sapiens GN=ATP6V1D PE=1 SV=1;tr|G3V2V6|G3V2V6_HUMAN V-type proton ATPase subunit D OS=Homo sapiens GN=ATP	81713000	28600000	11031000	8171300	2860000	83210000	59150000	3	3	3	20.3	20.3	20.3	21.921	0	13.631	110310000	9	20.3	8.3	6	3	7	3	1	3	1	3	1
736	H0YJN9;G3V2T4;G3V4E4;Q99538-3;Q99538-2;Q99538	H0YJN9;G3V2T4;G3V4E4;Q99538-3;Q99538-2;Q99538	Legumain	LGMN	tr|H0YJN9|H0YJN9_HUMAN Legumain (Fragment) OS=Homo sapiens GN=LGMN PE=1 SV=1;tr|G3V2T4|G3V2T4_HUMAN Legumain (Fragment) OS=Homo sapiens GN=LGMN PE=1 SV=1;tr|G3V4E4|G3V4E4_HUMAN Legumain OS=Homo sapiens GN=LGMN PE=1 SV=1;sp|Q99538-3|LGMN_HUMAN Isoform 3 of	0	33575000	8393800	0	8393800	0	36481000	1	1	1	18.7	18.7	18.7	9.658	0.00080214	3.378	33575000	1	0	18.7	0	1	6	0	1	0	1	0	1
737	G3V325;O75127;C9JJT5;P56134-4;P56134-2;C9JU26;C9JQN9;C9JGL8	G3V325;O75127	Pentatricopeptide repeat-containing protein 1, mitochondrial	ATP5J2-PTCD1;PTCD1	tr|G3V325|G3V325_HUMAN Protein ATP5J2-PTCD1 OS=Homo sapiens GN=ATP5J2-PTCD1 PE=4 SV=1;sp|O75127|PTCD1_HUMAN Pentatricopeptide repeat-containing protein 1, mitochondrial OS=Homo sapiens GN=PTCD1 PE=1 SV=2	3337000000	1647700000	115920000	77604000	38320000	2359000000	1671400000	14	14	12	21	21	17.8	84.109	0	110.7	4984700000	80	18	9.7	39	41	8	12	8	12	8	10	6
738	G3V3A0;P01011	G3V3A0;P01011	Alpha-1-antichymotrypsin;Alpha-1-antichymotrypsin His-Pro-less	SERPINA3	tr|G3V3A0|G3V3A0_HUMAN Alpha-1-antichymotrypsin OS=Homo sapiens GN=SERPINA3 PE=3 SV=1;sp|P01011|AACT_HUMAN Alpha-1-antichymotrypsin OS=Homo sapiens GN=SERPINA3 PE=1 SV=2	69335000	18966000	6792400	5333500	1458900	40211000	39270000	3	3	3	14.6	14.6	14.6	23.406	0.0002994	5.2809	88301000	5	10.2	9.8	4	1	2	2	2	2	2	2	2
739	G3V5P8;G3V3B2;G3V4K0;O95406	G3V5P8;G3V3B2;G3V4K0;O95406	Protein cornichon homolog 1	CNIH1	tr|G3V5P8|G3V5P8_HUMAN Protein cornichon homolog 1 OS=Homo sapiens GN=CNIH1 PE=4 SV=1;tr|G3V3B2|G3V3B2_HUMAN Protein cornichon homolog 1 OS=Homo sapiens GN=CNIH1 PE=4 SV=1;tr|G3V4K0|G3V4K0_HUMAN Cornichon homolog (Drosophila), isoform CRA_c OS=Homo sapiens	350510000	167400000	258960000	175260000	83698000	307660000	96245000	2	2	2	24	24	24	14.051	0	70.593	517910000	15	24	20.7	10	5	4	2	1	2	1	2	1
740	V9GY54;G3V3G9;Q5TAQ9;Q5TAQ9-2	V9GY54;G3V3G9;Q5TAQ9;Q5TAQ9-2	DDB1- and CUL4-associated factor 8	DCAF8	tr|V9GY54|V9GY54_HUMAN DDB1- and CUL4-associated factor 8 OS=Homo sapiens GN=DCAF8 PE=4 SV=1;tr|G3V3G9|G3V3G9_HUMAN DDB1- and CUL4-associated factor 8 OS=Homo sapiens GN=DCAF8 PE=4 SV=1;sp|Q5TAQ9|DCAF8_HUMAN DDB1- and CUL4-associated factor 8 OS=Homo sapie	17842000	0	713660	713660	0	16583000	0	2	2	2	5.5	5.5	5.5	46.525	0.00080537	3.4165	17842000	2	5.5	3.6	1	1	4	2	1	2	1	2	1
741	M0QXQ4;G3V3M5;M0QYC2;G3V3R1;G3V3Z8;P49757-8;P49757-7;P49757-6;P49757-5;P49757-4;P49757-2;Q9Y6R0;P49757-3;P49757	M0QXQ4;G3V3M5;M0QYC2;G3V3R1;G3V3Z8;P49757-8;P49757-7;P49757-6;P49757-5;P49757-4;P49757-2;Q9Y6R0;P49757-3;P49757	Protein numb homolog;Numb-like protein	NUMBL;NUMB	tr|M0QXQ4|M0QXQ4_HUMAN Numb-like protein (Fragment) OS=Homo sapiens GN=NUMBL PE=4 SV=1;tr|G3V3M5|G3V3M5_HUMAN Protein numb homolog (Fragment) OS=Homo sapiens GN=NUMB PE=4 SV=3;tr|M0QYC2|M0QYC2_HUMAN Numb-like protein (Fragment) OS=Homo sapiens GN=NUMBL PE=	16595000	46198000	5708500	1508700	4199800	0	62300000	1	1	1	7	7	7	22.764	0.0012768	2.8681	62793000	1	7	7	0	1	14	1	1	1	1	1	1
742	H0YJ63;G3V438;H0YJG7;O95433-2;O95433	H0YJ63;G3V438;H0YJG7;O95433-2;O95433	Activator of 90 kDa heat shock protein ATPase homolog 1	AHSA1	tr|H0YJ63|H0YJ63_HUMAN Activator of 90 kDa heat shock protein ATPase homolog 1 (Fragment) OS=Homo sapiens GN=AHSA1 PE=1 SV=1;tr|G3V438|G3V438_HUMAN Activator of 90 kDa heat shock protein ATPase homolog 1 (Fragment) OS=Homo sapiens GN=AHSA1 PE=1 SV=1;tr|H0Y	110010000	95906000	51479000	27503000	23976000	143520000	111360000	2	2	2	37.8	37.8	37.8	10.031	0	19.437	205920000	13	37.8	24.4	8	5	5	2	1	2	1	2	1
743	G3V4I0;O75356;G3V450;G3V3Y0;REV__Q8N2N9-4;REV__A0A087X037;REV__E9PJI0;REV__Q5VUR7;REV__Q5TYW2;REV__Q5SQ80;REV__Q5CZ79;REV__Q4UJ75;REV__Q8N2N9-3;REV__Q8N2N9-2;REV__Q8N2N9;REV__Q5JPF3;REV__A6QL64	G3V4I0;O75356;G3V450	Ectonucleoside triphosphate diphosphohydrolase 5	ENTPD5	tr|G3V4I0|G3V4I0_HUMAN Ectonucleoside triphosphate diphosphohydrolase 5 OS=Homo sapiens GN=ENTPD5 PE=3 SV=1;sp|O75356|ENTP5_HUMAN Ectonucleoside triphosphate diphosphohydrolase 5 OS=Homo sapiens GN=ENTPD5 PE=1 SV=1;tr|G3V450|G3V450_HUMAN Ectonucleoside tri	314450000	107230000	16867000	12578000	4289400	225120000	168410000	5	5	5	18.7	18.7	18.7	45.335	0	36.192	421680000	14	18.7	14.3	7	7	17	5	4	5	4	5	4
744	G3V5H8;G3V4S9;Q9UN36-2;Q9UN36;G3V5L7;G3V578;H0YJT9;Q9UN36-4;Q9UN36-3;Q9UN36-6;G3V2I9;Q9UN36-5;G3V271;G3V2A6;G3V5B7;G3V383;G3V5S0;G3V392;G3V5G0;G3V4X3;G3V5B5;G3V239;G3V5P9;G3V5D7;G3V420;G3V2S0;G3V3C3;G3V2Y3;G3V5G7;A0A088AWQ3;G3V552;G3V3X3;G3V3P6;G3V237;H0YJ56;G3V4T9;G3V2T2;G3V5A6;G3V280;G3V3P1;G3V5V9;G3V3D5;G3V3X2;G3V285;G3V4S2;G3V358;H7C0X0	G3V5H8;G3V4S9;Q9UN36-2;Q9UN36;G3V5L7;G3V578;H0YJT9;Q9UN36-4;Q9UN36-3;Q9UN36-6;G3V2I9;Q9UN36-5	Protein NDRG2	NDRG2	tr|G3V5H8|G3V5H8_HUMAN Protein NDRG2 (Fragment) OS=Homo sapiens GN=NDRG2 PE=1 SV=1;tr|G3V4S9|G3V4S9_HUMAN Protein NDRG2 (Fragment) OS=Homo sapiens GN=NDRG2 PE=1 SV=3;sp|Q9UN36-2|NDRG2_HUMAN Isoform 2 of Protein NDRG2 OS=Homo sapiens GN=NDRG2;sp|Q9UN36|NDRG	154440000	16796000	14270000	12870000	1399700	86804000	46956000	5	5	5	37	37	37	30.495	0	20.966	171240000	11	37	16.8	8	3	47	5	2	5	2	5	2
745	G3V4W4;Q96EK6	G3V4W4;Q96EK6	Glucosamine 6-phosphate N-acetyltransferase	GNPNAT1	tr|G3V4W4|G3V4W4_HUMAN Glucosamine 6-phosphate N-acetyltransferase (Fragment) OS=Homo sapiens GN=GNPNAT1 PE=1 SV=1;sp|Q96EK6|GNA1_HUMAN Glucosamine 6-phosphate N-acetyltransferase OS=Homo sapiens GN=GNPNAT1 PE=1 SV=1	29675000	0	2967500	2967500	0	35387000	0	2	2	2	33.1	33.1	33.1	18.057	0.00030883	5.9406	29675000	2	33.1	0	2	0	2	2	0	2	0	2	0
746	G3V529;Q9GZR7;A0A087WXU8;F5GYL3;Q9GZR7-2	G3V529;Q9GZR7;A0A087WXU8;F5GYL3;Q9GZR7-2	ATP-dependent RNA helicase DDX24	DDX24	tr|G3V529|G3V529_HUMAN ATP-dependent RNA helicase DDX24 OS=Homo sapiens GN=DDX24 PE=1 SV=1;sp|Q9GZR7|DDX24_HUMAN ATP-dependent RNA helicase DDX24 OS=Homo sapiens GN=DDX24 PE=1 SV=1;tr|A0A087WXU8|A0A087WXU8_HUMAN ATP-dependent RNA helicase DDX24 OS=Homo sap	278570000	137120000	8313800	5571400	2742400	235390000	277130000	9	9	9	13.6	13.6	13.6	91.48	0	16.522	415690000	16	13.6	5.1	11	5	5	9	4	9	4	9	4
747	G3V556;P56378;P56378-2	G3V556;P56378;P56378-2	6.8 kDa mitochondrial proteolipid	C14orf2;MP68	tr|G3V556|G3V556_HUMAN 6.8 kDa mitochondrial proteolipid OS=Homo sapiens GN=C14orf2 PE=1 SV=1;sp|P56378|68MP_HUMAN 6.8 kDa mitochondrial proteolipid OS=Homo sapiens GN=MP68 PE=1 SV=1;sp|P56378-2|68MP_HUMAN Isoform 2 of 6.8 kDa mitochondrial proteolipid OS=	402120000	340970000	185770000	100530000	85243000	416000000	508980000	2	2	2	19.2	19.2	19.2	11.281	0.00079533	3.2834	743090000	16	19.2	19.2	8	8	3	2	2	2	2	2	2
748	G3V599;O15320-4;O15320-3;O15320-10;O15320;O15320-5;O15320-9;O15320-8;O15320-6;O15320-7;O15320-2;G3V5K6;G3V3C4;Q96PC5;A4FU28;Q8IX94;Q86UF2;P0CG41;A4D2H0	G3V599;O15320-4;O15320-3;O15320-10;O15320;O15320-5;O15320-9;O15320-8;O15320-6;O15320-7;O15320-2	cTAGE family member 5	CTAGE5	tr|G3V599|G3V599_HUMAN cTAGE family member 5 OS=Homo sapiens GN=CTAGE5 PE=4 SV=1;sp|O15320-4|CTGE5_HUMAN Isoform 5B of cTAGE family member 5 OS=Homo sapiens GN=CTAGE5;sp|O15320-3|CTGE5_HUMAN Isoform 5A of cTAGE family member 5 OS=Homo sapiens GN=CTAGE5;sp|	324070000	269790000	7423300	4050900	3372400	288820000	256440000	12	12	8	12.4	12.4	8.7	151.72	0	58.918	593870000	24	11	6.9	14	10	19	10	7	10	7	7	5
749	G3V5X4;Q8WXH0;Q8WXH0-2;Q8WXH0-7	G3V5X4;Q8WXH0;Q8WXH0-2	Nesprin-2	SYNE2	tr|G3V5X4|G3V5X4_HUMAN Nesprin-2 OS=Homo sapiens GN=SYNE2 PE=1 SV=1;sp|Q8WXH0|SYNE2_HUMAN Nesprin-2 OS=Homo sapiens GN=SYNE2 PE=1 SV=3;sp|Q8WXH0-2|SYNE2_HUMAN Isoform 2 of Nesprin-2 OS=Homo sapiens GN=SYNE2	3508600	21637000	56003	7814.3	48189	0	26439000	3	3	3	0.6	0.6	0.6	787.71	0.0041423	2.3472	25146000	3	0.5	0.1	2	1	4	2	1	2	1	2	1
750	G3V5Z7;P60900;G3V295;P60900-2;G3V3I1;G3V3U4;P60900-3;H0YJC4;G3V4S5;G3V2S7	G3V5Z7;P60900;G3V295;P60900-2;G3V3I1;G3V3U4	Proteasome subunit alpha type;Proteasome subunit alpha type-6	PSMA6	tr|G3V5Z7|G3V5Z7_HUMAN Proteasome subunit alpha type OS=Homo sapiens GN=PSMA6 PE=1 SV=1;sp|P60900|PSA6_HUMAN Proteasome subunit alpha type-6 OS=Homo sapiens GN=PSMA6 PE=1 SV=1;tr|G3V295|G3V295_HUMAN Proteasome subunit alpha type OS=Homo sapiens GN=PSMA6 PE	349930000	420020000	45291000	20584000	24707000	357280000	420090000	10	10	10	50	50	50	28.147	0	49.7	769950000	46	41.7	39.7	19	27	10	8	8	8	8	8	8
751	G3XAC1;Q86YZ4;Q9BXS9-5;Q9BXS9-7;Q9BXS9-4;Q9BXS9-2;Q9BXS9-3;Q9BXS9;Q9BXS9-6;F8W9I8;C9J6Y3;C9JKR6;H7BZJ6	G3XAC1;Q86YZ4;Q9BXS9-5;Q9BXS9-7;Q9BXS9-4;Q9BXS9-2;Q9BXS9-3;Q9BXS9;Q9BXS9-6	Solute carrier family 26 member 6	SLC26A6	tr|G3XAC1|G3XAC1_HUMAN Solute carrier family 26 member 6 OS=Homo sapiens GN=SLC26A6 PE=1 SV=1;tr|Q86YZ4|Q86YZ4_HUMAN Solute carrier family 26 member 6 OS=Homo sapiens GN=SLC26A6 PE=1 SV=1;sp|Q9BXS9-5|S26A6_HUMAN Isoform 5 of Solute carrier family 26 member	72924000	7599400	2684100	2430800	253310	46299000	0	4	4	4	11.4	11.4	11.4	71.535	0	12.712	80524000	5	5.7	5.7	3	2	13	2	2	2	2	2	2
752	G3XAG1;Q96ME7-2;Q96ME7-3;Q96ME7	G3XAG1;Q96ME7-2;Q96ME7-3;Q96ME7	Zinc finger protein 512	ZNF512	tr|G3XAG1|G3XAG1_HUMAN Zinc finger protein 512 OS=Homo sapiens GN=ZNF512 PE=4 SV=1;sp|Q96ME7-2|ZN512_HUMAN Isoform 2 of Zinc finger protein 512 OS=Homo sapiens GN=ZNF512;sp|Q96ME7-3|ZN512_HUMAN Isoform 3 of Zinc finger protein 512 OS=Homo sapiens GN=ZNF512	309230000	403580000	22275000	9663400	12612000	416760000	371350000	12	12	12	31.4	31.4	31.4	64.594	0	79.524	712810000	31	25.3	26.7	11	20	4	9	10	9	10	9	10
753	H0YJ00;G3XAH6;P51003-2;Q9NRJ5;P51003	H0YJ00;G3XAH6;P51003-2;Q9NRJ5;P51003	Poly(A) polymerase alpha;Poly(A) polymerase beta	PAPOLA;PAPOLB	tr|H0YJ00|H0YJ00_HUMAN Poly(A) polymerase alpha (Fragment) OS=Homo sapiens GN=PAPOLA PE=1 SV=1;tr|G3XAH6|G3XAH6_HUMAN Poly(A) polymerase alpha OS=Homo sapiens GN=PAPOLA PE=1 SV=1;sp|P51003-2|PAPOA_HUMAN Isoform 2 of Poly(A) polymerase alpha OS=Homo sapiens	8401000	0	600070	600070	0	12174000	0	1	1	1	7.9	7.9	7.9	23.356	0.0007837	3.1446	8401000	2	7.9	0	2	0	5	1	0	1	0	1	0
754	G3XAI2;P07942;E7EPA6;E9PCS6;C9J296	G3XAI2;P07942	Laminin subunit beta-1	LAMB1	tr|G3XAI2|G3XAI2_HUMAN Laminin subunit beta-1 OS=Homo sapiens GN=LAMB1 PE=1 SV=1;sp|P07942|LAMB1_HUMAN Laminin subunit beta-1 OS=Homo sapiens GN=LAMB1 PE=1 SV=2	632080000	866640000	15293000	6449800	8843300	764830000	816950000	29	29	29	27.2	27.2	27.2	200.48	0	253.04	1498700000	76	21.6	20.7	39	37	5	23	23	23	23	23	23
755	G3XAL2;Q15910;Q15910-2	G3XAL2;Q15910;Q15910-2	Histone-lysine N-methyltransferase EZH2	EZH2	tr|G3XAL2|G3XAL2_HUMAN Enhancer of zeste homolog 2 (Drosophila), isoform CRA_b OS=Homo sapiens GN=EZH2 PE=4 SV=1;sp|Q15910|EZH2_HUMAN Histone-lysine N-methyltransferase EZH2 OS=Homo sapiens GN=EZH2 PE=1 SV=2;sp|Q15910-2|EZH2_HUMAN Isoform 2 of Histone-lysi	0	27857000	1989800	0	1989800	0	30894000	1	1	1	5.4	5.4	5.4	38.858	0.0012758	2.8583	27857000	1	0	5.4	0	1	3	0	1	0	1	0	1
756	G3XAN4;Q15629-2;Q15629	G3XAN4;Q15629-2;Q15629	Translocating chain-associated membrane protein 1	TRAM1	tr|G3XAN4|G3XAN4_HUMAN Translocating chain-associated membrane protein 1 OS=Homo sapiens GN=TRAM1 PE=1 SV=1;sp|Q15629-2|TRAM1_HUMAN Isoform 2 of Translocating chain-associated membrane protein 1 OS=Homo sapiens GN=TRAM1;sp|Q15629|TRAM1_HUMAN Translocating	662260000	542420000	109520000	60205000	49311000	555200000	523290000	4	4	4	13.2	13.2	13.2	33.435	0	61.589	1204700000	28	13.2	10.4	15	13	3	4	3	4	3	4	3
757	G5E975;Q12824-2;Q12824;C9JTA6;B5MCL5	G5E975;Q12824-2;Q12824	SWI/SNF-related matrix-associated actin-dependent regulator of chromatin subfamily B member 1	SMARCB1	tr|G5E975|G5E975_HUMAN SWI/SNF related, matrix associated, actin dependent regulator of chromatin, subfamily b, member 1, isoform CRA_c OS=Homo sapiens GN=SMARCB1 PE=1 SV=1;sp|Q12824-2|SNF5_HUMAN Isoform B of SWI/SNF-related matrix-associated actin-depende	26868000	50002000	4045800	1414100	2631700	0	57546000	5	5	5	24.4	24.4	24.4	45.05	0	21.126	76869000	9	12.4	11.9	5	4	5	3	2	3	2	3	2
758	G5E9A6;P51784	G5E9A6;P51784	Ubiquitin carboxyl-terminal hydrolase;Ubiquitin carboxyl-terminal hydrolase 11	USP11	tr|G5E9A6|G5E9A6_HUMAN Ubiquitin carboxyl-terminal hydrolase OS=Homo sapiens GN=USP11 PE=1 SV=1;sp|P51784|UBP11_HUMAN Ubiquitin carboxyl-terminal hydrolase 11 OS=Homo sapiens GN=USP11 PE=1 SV=3	101760000	27930000	2593800	2035200	558600	95946000	29694000	8	8	8	15.9	15.9	15.9	105.03	0	22.651	129690000	14	13.7	3.5	9	5	2	6	3	6	3	6	3
759	H7C1P2;G5E9G4;Q9ULT0;Q2T9J9	H7C1P2;G5E9G4;Q9ULT0;Q2T9J9	Tetratricopeptide repeat protein 7A	TTC7A	tr|H7C1P2|H7C1P2_HUMAN Tetratricopeptide repeat protein 7A (Fragment) OS=Homo sapiens GN=TTC7A PE=4 SV=1;tr|G5E9G4|G5E9G4_HUMAN Tetratricopeptide repeat domain 7A, isoform CRA_a OS=Homo sapiens GN=TTC7A PE=1 SV=1;sp|Q9ULT0|TTC7A_HUMAN Tetratricopeptide rep	9378600	0	1339800	1339800	0	13591000	0	1	1	1	13	13	13	11.948	0.0085026	1.9867	9378600	1	13	0	1	0	4	1	0	1	0	1	0
760	G5E9W7;G5E9V5;P82650;H7C5F2;H7C5H3;P82650-2;H7C5L9;C9J5D8	G5E9W7;G5E9V5;P82650;H7C5F2;H7C5H3;P82650-2	28S ribosomal protein S22, mitochondrial	MRPS22	tr|G5E9W7|G5E9W7_HUMAN 28S ribosomal protein S22, mitochondrial OS=Homo sapiens GN=MRPS22 PE=1 SV=1;tr|G5E9V5|G5E9V5_HUMAN 28S ribosomal protein S22, mitochondrial OS=Homo sapiens GN=MRPS22 PE=1 SV=1;sp|P82650|RT22_HUMAN 28S ribosomal protein S22, mitochon	1203200000	1395700000	112990000	52312000	60681000	1195900000	1251000000	16	16	16	57.4	57.4	57.4	36.805	0	247.34	2598800000	121	51.4	57.1	63	58	8	14	15	14	15	14	15
761	G5E9Z4;Q8TCG2	G5E9Z4;Q8TCG2	Phosphatidylinositol 4-kinase type 2-beta	PI4K2B	tr|G5E9Z4|G5E9Z4_HUMAN Phosphatidylinositol 4-kinase type 2 beta OS=Homo sapiens GN=PI4K2B PE=4 SV=1;sp|Q8TCG2|P4K2B_HUMAN Phosphatidylinositol 4-kinase type 2-beta OS=Homo sapiens GN=PI4K2B PE=1 SV=1	15748000	14077000	1065200	562430	502740	11036000	15163000	3	3	3	7.3	7.3	7.3	44.761	0.00056038	4.0546	29825000	3	5.2	4.9	1	2	2	2	2	2	2	2	2
[truncated: 3,524 more rows]
