# Supplementary material for: An efficient method for high-pH peptide fractionation based on C18 StageTips for in-depth proteome profiling
Source: Royal Society of Chemistry journal article supplement (doi:10.1039/c9ay01269a), 2019-01-01
Supplement: c9ay01269a3.xlsx [file c9ay01269a3.xlsx]

## Sheet: Supplementary Table S10
Supplementary Table S10. Gene ontology (GO) enrichment results of major three clusters. Enrichment analysis was performed using Perseus software with GO, KEGG, and GSEA terms. The adjusted p-value (Benj. Hoch. FDR) cutoff for the annotation was set to < 0.05.
Cluster ID	Type	Name	P value	Enrichment	Total	In cluster	Cluster size	Benj. Hoch. FDR
Cluster 1	GOCC name	mitochondrion	7.0093e-23	2.9071	377	85	245	7.0023e-20
Cluster 1	GOCC name	mitochondrial part	3.4851e-18	3.6439	184	52	245	1.7408e-15
Cluster 1	GSEA	MOOTHA_MITOCHONDRIA	3.9402e-14	4.2153	104	34	245	3.9367e-10
Cluster 1	GOCC name	mitochondrial membrane	5.1643e-14	3.8786	123	37	245	1.7197e-11
Cluster 1	GSEA	MOOTHA_HUMAN_MITODB_6_2002	4.5043e-13	3.9142	112	34	245	2.2501e-09
Cluster 1	GOCC name	cytoplasmic part	1.7892e-12	1.446	1498	168	245	4.4684e-10
Cluster 1	GOCC name	membrane-enclosed lumen	5.4578e-10	3.7036	94	27	245	1.0905e-07
Cluster 1	GSEA	MITOCHONDRION	8.2173e-10	v	83	25	245	2.7366e-06
Cluster 1	GOCC name	mitochondrial inner membrane	1.4287e-09	3.7923	85	25	245	2.3789e-07
Cluster 1	GOCC name	integral to membrane	6.4508e-09	1.8089	556	78	245	8.0555e-07
Cluster 1	GOCC name	organelle inner membrane	7.3523e-09	3.4208	98	26	245	8.1611e-07
Cluster 1	GOCC name	intrinsic to membrane	1.3897e-08	1.7603	586	80	245	1.3883e-06
Cluster 1	GOCC name	intracellular organelle lumen	3.333e-08	3.6367	78	22	245	3.027e-06
Cluster 1	GOCC name	organelle lumen	4.2851e-08	3.5907	79	22	245	3.293e-06
Cluster 1	GOCC name	mitochondrial matrix	2.1349e-07	4.298	48	16	245	1.5234e-05
Cluster 1	GOCC name	organelle membrane	6.1091e-07	1.6818	552	72	245	4.0686e-05
Cluster 1	GSEA	WONG_MITOCHONDRIA_GENE_MODULE	1.2619e-06	3.8204	54	16	245	0.0025216
Cluster 1	GSEA	REACTOME_TCA_CYCLE_AND_RESPIRATORY_ELECTRON_TRANSPORT	1.5322e-06	4.5303	37	13	245	0.0025514
Cluster 1	GOBP name	regulation of mitochondrion organization	2.2094e-06	7.3679	14	8	245	0.0053136
Cluster 1	GOCC name	membrane-bounded organelle	4.4566e-06	1.1856	2088	192	245	0.00023432
Cluster 1	GOCC name	endoplasmic reticulum part	9.7422e-06	2.3143	156	28	245	0.00048662
Cluster 1	GOBP name	mitochondrion organization	1.5174e-05	3.5395	51	14	245	0.0091234
Cluster 1	GOCC name	membrane part	3.0142e-05	1.3723	949	101	245	0.0014339
Cluster 1	GOMF name	oxidoreductase activity	3.9931e-05	2.27	142	25	245	0.042407
Cluster 1	GSEA	STEIN_ESRRA_TARGETS_UP	4.4035e-05	2.6342	93	19	245	0.043996
Cluster 1	GOCC name	organelle	4.6692e-05	1.1421	2258	200	245	0.0021202
Cluster 1	GSEA	OXIDOREDUCTASE_ACTIVITY	6.1765e-05	2.8653	72	16	245	0.047469
Cluster 1	GOBP name	oxidation-reduction process	0.00017476	2.3785	103	19	245	0.042029
Cluster 1	GOCC name	mitochondrial intermembrane space	0.00032835	5.5259	14	6	245	0.013667
Cluster 1	GOCC name	intracellular membrane-bounded organelle	0.00040838	1.1708	1751	159	245	0.016319
Cluster 1	GOCC name	endoplasmic reticulum	0.00068389	1.8851	171	25	245	0.026277
Cluster 1	GOCC name	dynein complex	0.000776	5.8609	11	5	245	0.027687
Cluster 1	GOCC name	organelle envelope lumen	0.0010675	4.5508	17	6	245	0.036772
Cluster 1	GOCC name	mitochondrial membrane part	0.0015266	3.3275	31	8	245	0.046216
Cluster 1	GOCC name	membrane	0.0017484	1.1746	1449	132	245	0.049904
Cluster 1	GOCC name	respiratory chain complex I	0.0018446	4.9592	13	5	245	0.048494
Cluster 1	GOCC name	NADH dehydrogenase complex	0.0018446	4.9592	13	5	245	0.049805
Cluster ID	Type	Name	P value	Enrichment	Total	In cluster	Cluster size	Benj. Hoch. FDR
Cluster 2	GOCC name	mitochondrion	7.0093e-23	2.9071	377	85	245	7.0023e-20
Cluster 2	GOCC name	mitochondrial part	3.4851e-18	3.6439	184	52	245	1.7408e-15
Cluster 2	GSEA	MOOTHA_MITOCHONDRIA	3.9402e-14	4.2153	104	34	245	3.9367e-10
Cluster 2	GOCC name	mitochondrial membrane	5.1643e-14	3.8786	123	37	245	1.7197e-11
Cluster 2	GSEA	MOOTHA_HUMAN_MITODB_6_2002	4.5043e-13	3.9142	112	34	245	2.2501e-09
Cluster 2	GOCC name	cytoplasmic part	1.7892e-12	1.446	1498	168	245	4.4684e-10
Cluster 2	GSEA	TRANSLATION	1.9196e-12	7.9139	69	18	104	1.9179e-08
Cluster 2	GSEA	MACROMOLECULE_BIOSYNTHETIC_PROCESS	6.9296e-12	6.8618	84	19	104	3.4617e-08
Cluster 2	GSEA	MORF_TPT1	4.7804e-11	7.1628	72	17	104	1.592e-07
Cluster 2	GSEA	REACTOME_TRANSLATION	1.2868e-10	6.2765	87	18	104	3.214e-07
Cluster 2	GSEA	CELLULAR_BIOSYNTHETIC_PROCESS	2.1192e-10	5.7069	101	19	104	4.2346e-07
Cluster 2	GSEA	MORF_ACTG1	4.1065e-10	5.8716	93	18	104	6.838e-07
Cluster 2	GOCC name	membrane-enclosed lumen	5.4578e-10	3.7036	94	27	245	1.0905e-07
Cluster 2	GSEA	BIOSYNTHETIC_PROCESS	6.4427e-10	5.0561	120	20	104	9.1956e-07
Cluster 2	GSEA	MITOCHONDRION	8.2173e-10	3.8837	83	25	245	2.7366e-06
Cluster 2	GSEA	MORF_NME2	9.3913e-10	5.9968	86	17	104	1.1729e-06
Cluster 2	GSEA	MORF_NPM1	9.7351e-10	5.2399	110	19	104	1.0807e-06
Cluster 2	GSEA	GNF2_EIF3S6	1.4195e-09	6.3037	77	16	104	1.4183e-06
Cluster 2	GOCC name	mitochondrial inner membrane	1.4287e-09	3.7923	85	25	245	2.3789e-07
Cluster 2	GOCC name	extracellular space	2.7512e-09	3.4102	161	28	161	2.7485e-06
Cluster 2	GSEA	STRUCTURAL_CONSTITUENT_OF_RIBOSOME	5.099e-09	7.5841	52	13	104	4.6313e-06
Cluster 2	GSEA	REACTOME_3_UTR_MEDIATED_TRANSLATIONAL_REGULATION	5.7044e-09	6.2335	73	15	104	4.7494e-06
Cluster 2	GOCC name	integral to membrane	6.4508e-09	1.8089	556	78	245	8.0555e-07
Cluster 2	GOCC name	organelle inner membrane	7.3523e-09	3.4208	98	26	245	8.1611e-07
Cluster 2	GOBP name	signal transduction	9.7844e-09	1.7621	557	82	264	7.0594e-06
Cluster 2	GSEA	REACTOME_METABOLISM_OF_PROTEINS	1.1632e-08	4.5385	127	19	104	8.9399e-06
Cluster 2	GOCC name	intrinsic to membrane	1.3897e-08	1.7603	586	80	245	1.3883e-06
Cluster 2	GSEA	REACTOME_SRP_DEPENDENT_COTRANSLATIONAL_PROTEIN_TARGETING_TO_MEMBRANE	1.5247e-08	6.339	67	14	104	1.0881e-05
Cluster 2	GSEA	GNF2_GLTSCR2	1.7305e-08	11.871	23	9	104	1.1526e-05
Cluster 2	GOMF name	peptidase inhibitor activity	1.7305e-08	11.871	23	9	104	1.8377e-05
Cluster 2	GOMF name	endopeptidase inhibitor activity	1.7305e-08	11.871	23	9	104	3.6755e-05
Cluster 2	GSEA	PECE_MAMMARY_STEM_CELL_DN	2.0656e-08	7.5841	48	12	104	1.2898e-05
Cluster 2	GOMF name	endopeptidase regulator activity	2.6848e-08	11.376	24	9	104	1.9008e-05
Cluster 2	GSEA	REACTOME_INFLUENZA_VIRAL_RNA_TRANSCRIPTION_AND_REPLICATION	2.7551e-08	6.0673	70	14	104	1.6192e-05
Cluster 2	GSEA	MODULE_83	3.0379e-08	4.072	149	20	104	1.6862e-05
Cluster 2	GSEA	KEGG_RIBOSOME	3.2689e-08	6.5729	60	13	104	1.7189e-05
Cluster 2	GOCC name	intracellular organelle lumen	3.333e-08	3.6367	78	22	245	3.027e-06
Cluster 2	GSEA	REACTOME_INFLUENZA_LIFE_CYCLE	3.9565e-08	5.0561	96	16	104	1.9765e-05
Cluster 2	KEGG name	Ribosome	4.032e-08	6.4652	61	13	104	9.9994e-06
Cluster 2	GSEA	REACTOME_PEPTIDE_CHAIN_ELONGATION	4.032e-08	6.4652	61	13	104	1.9183e-05
Cluster 2	GOMF name	structural constituent of ribosome	4.032e-08	6.4652	61	13	104	2.141e-05
Cluster 2	GSEA	CELLULAR_PROTEIN_METABOLIC_PROCESS	4.0444e-08	2.9804	285	28	104	1.8367e-05
Cluster 2	GOCC name	organelle lumen	4.2851e-08	3.5907	79	22	245	3.293e-06
Cluster 2	GSEA	MODULE_151	4.7638e-08	4.4037	124	18	104	2.0693e-05
Cluster 2	GSEA	CELLULAR_MACROMOLECULE_METABOLIC_PROCESS	5.0772e-08	2.9494	288	28	104	2.1136e-05
Cluster 2	GSEA	REACTOME_METABOLISM_OF_MRNA	9.5098e-08	4.7587	102	16	104	3.8005e-05
Cluster 2	GSEA	MORF_JUND	1.0687e-07	7.4156	45	11	104	4.1069e-05
Cluster 2	GSEA	MODULE_114	1.1252e-07	4.1684	131	18	104	4.1635e-05
Cluster 2	GSEA	REACTOME_NONSENSE_MEDIATED_DECAY_ENHANCED_BY_THE_EXON_JUNCTION_COMPLEX	1.5626e-07	5.7996	68	13	104	5.5759e-05
Cluster 2	GSEA	REACTOME_METABOLISM_OF_RNA	2.0035e-07	4.0151	136	18	104	6.9025e-05
Cluster 2	GOCC name	mitochondrial matrix	2.1349e-07	4.298	48	16	245	1.5234e-05
Cluster 2	GOBP name	cell surface receptor linked signaling pathway	2.3892e-07	2.0759	271	47	264	0.00012313
Cluster 2	GOMF name	peptidase regulator activity	2.4415e-07	9.101	30	9	104	0.00010372
Cluster 2	GSEA	PROTEIN_METABOLIC_PROCESS	3.8707e-07	2.6796	317	28	104	0.00012891
Cluster 2	GOCC name	plasma membrane	4.0181e-07	1.6181	614	83	264	8.0282e-05
Cluster 2	GOCC name	organelle membrane	6.1091e-07	1.6818	552	72	245	4.0686e-05
Cluster 2	GOBP name	translation	8.4841e-07	5.5157	66	12	104	0.0061213
Cluster 2	GSEA	EXTRACELLULAR_REGION	9.4154e-07	4.9022	52	13	161	0.0094069
Cluster 2	GSEA	WONG_MITOCHONDRIA_GENE_MODULE	1.2619e-06	3.8204	54	16	245	0.0025216
Cluster 2	GOMF name	structural molecule activity	1.2855e-06	3.5458	154	18	104	0.00045508
Cluster 2	GSEA	REACTOME_TCA_CYCLE_AND_RESPIRATORY_ELECTRON_TRANSPORT	1.5322e-06	4.5303	37	13	245	0.0025514
Cluster 2	GSEA	MORF_UBE2I	1.5346e-06	3.6837	140	17	104	0.00049459
Cluster 2	GSEA	HSIAO_LIVER_SPECIFIC_GENES	1.5374e-06	5.1153	46	12	161	0.00768
Cluster 2	GOBP name	actin cytoskeleton organization	2.1467e-06	2.4445	142	29	264	0.00073756
Cluster 2	GOBP name	regulation of mitochondrion organization	2.2094e-06	7.3679	14	8	245	0.0053136
Cluster 2	GSEA	MODULE_24	2.3214e-06	3.9747	74	15	161	0.007731
Cluster 2	GOCC name	extracellular region part	2.5319e-06	1.5803	881	71	161	0.0012647
Cluster 2	GSEA	CAR_HPX	2.7605e-06	11.765	10	6	161	0.0068951
Cluster 2	GOCC name	extracellular vesicular exosome	3.1286e-06	1.6278	783	65	161	0.00062509
Cluster 2	GOCC name	extracellular organelle	3.1286e-06	1.6278	783	65	161	0.00078137
Cluster 2	GOCC name	extracellular membrane-bounded organelle	3.1286e-06	1.6278	783	65	161	0.0010418
Cluster 2	GOCC name	ribosome	3.1525e-06	8.0897	30	8	104	0.0031493
Cluster 2	GSEA	OSMAN_BLADDER_CANCER_DN	3.6092e-06	3.6495	133	16	104	0.0011269
Cluster 2	GSEA	STRUCTURAL_MOLECULE_ACTIVITY	3.6737e-06	4.1234	103	14	104	0.0011122
Cluster 2	GOBP name	actin filament-based process	3.8024e-06	2.3775	146	29	264	0.001247
Cluster 2	GSEA	LI_AMPLIFIED_IN_LUNG_CANCER	4.39e-06	5.2141	64	11	104	0.00129
Cluster 2	GOCC name	membrane-bounded organelle	4.4566e-06	1.1856	2088	192	245	0.00023432
Cluster 2	GOCC name	cytosolic large ribosomal subunit	5.3225e-06	7.5841	32	8	104	0.0026586
Cluster 2	GOBP name	neuron recognition	6.1974e-06	7.6171	11	7	264	0.0019441
Cluster 2	GOCC name	aminoacyl-tRNA synthetase multienzyme complex	6.5272e-06	19.609	4	4	161	0.0010868
Cluster 2	GSEA	BIOCARTA_INTRINSIC_PATHWAY	6.5272e-06	19.609	4	4	161	0.010869
Cluster 2	GSEA	BIOCARTA_AMI_PATHWAY	6.5272e-06	19.609	4	4	161	0.013043
Cluster 2	GOCC name	blood microparticle	6.9745e-06	6.0855	29	9	161	0.00099536
Cluster 2	GOCC name	membrane-bounded vesicle	6.9791e-06	1.5384	905	71	161	0.00087151
Cluster 2	GSEA	GSE1460_CD4_THYMOCYTE_VS_THYMIC_STROMAL_CELL_DN	8.3333e-06	5.2996	37	10	161	0.011894
Cluster 2	GOMF name	enzyme inhibitor activity	8.5804e-06	5.4172	56	10	104	0.0026035
Cluster 2	GSEA	LEIN_CHOROID_PLEXUS_MARKERS	9.3152e-06	8.0742	17	7	161	0.011634
Cluster 2	GOCC name	endoplasmic reticulum part	9.7422e-06	2.3143	156	28	245	0.00048662
Cluster 2	GOCC name	large ribosomal subunit	1.0845e-05	6.9341	35	8	104	0.0036112
Cluster 2	GSEA	BILANGES_SERUM_AND_RAPAMYCIN_SENSITIVE_GENES	1.1459e-05	5.9354	46	9	104	0.003271
Cluster 2	GOBP name	response to stimulus	1.2272e-05	1.3348	1103	123	264	0.0035418
Cluster 2	GOBP name	regulation of protein secretion	1.2798e-05	6.5362	24	8	161	0.046171
Cluster 2	KEGG name	Axon guidance	1.2811e-05	3.5654	47	14	264	0.0031772
Cluster 2	GSEA	REACTOME_AXON_GUIDANCE	1.3951e-05	2.5257	109	23	264	0.017424
Cluster 2	GOCC name	cytosol	1.4075e-05	1.8991	413	40	161	0.0015623
Cluster 2	GOBP name	mitochondrion organization	1.5174e-05	3.5395	51	14	245	0.0091234
Cluster 2	GSEA	MODULE_32	1.5358e-05	3.2576	149	16	104	0.0042624
Cluster 2	GSEA	VANDESLUIS_COMMD1_TARGETS_GROUP_4_UP	1.5629e-05	12.255	8	5	161	0.01735
Cluster 2	GSEA	HSIAO_HOUSEKEEPING_GENES	1.8136e-05	2.9358	186	18	104	0.0048972
Cluster 2	GSEA	REACTOME_SIGNALING_BY_WNT	1.9385e-05	9.0502	13	6	161	0.019367
Cluster 2	GSEA	KEGG_AXON_GUIDANCE	2.1417e-05	3.4199	49	14	264	0.019452
Cluster 2	GOCC name	vesicle	2.18e-05	1.4906	934	71	161	0.0019798
Cluster 2	GSEA	GSE7852_THYMUS_VS_FAT_TCONV_UP	2.1892e-05	3.6187	43	13	264	0.018227
Cluster 2	GOMF name	serine-type endopeptidase inhibitor activity	2.2425e-05	12.64	12	5	104	0.0059537
Cluster 2	GOCC name	membrane part	2.7299e-05	1.3579	952	108	264	0.0027272
Cluster 2	GSEA	EXTRACELLULAR_REGION_PART	2.7465e-05	4.6687	42	10	161	0.024945
Cluster 2	GSEA	GSE22886_NAIVE_BCELL_VS_NEUTROPHIL_UP	2.8521e-05	4.7401	64	10	104	0.0074988
Cluster 2	GOCC name	membrane part	3.0142e-05	1.3723	949	101	245	0.0014339
Cluster 2	GSEA	MODULE_23	3.0944e-05	3.0759	102	16	161	0.025763
Cluster 2	GOBP name	regulation of heterotypic cell-cell adhesion	3.1011e-05	15.687	5	4	161	0.037291
Cluster 2	GOBP name	regulation of cell-cell adhesion involved in gastrulation	3.1011e-05	15.687	5	4	161	0.044749
Cluster 2	GSEA	CASORELLI_APL_SECONDARY_VS_DE_NOVO_DN	3.5453e-05	17.335	7	4	104	0.0090824
Cluster 2	GOBP name	cytoskeleton organization	3.5738e-05	1.9008	233	37	264	0.0085951
Cluster 2	GSEA	GCM_TPT1	3.7085e-05	5.1515	53	9	104	0.0092628
Cluster 2	GSEA	REACTOME_OPIOID_SIGNALLING	3.7286e-05	3.683	39	12	264	0.023283
Cluster 2	GOMF name	oxidoreductase activity	3.9931e-05	2.27	142	25	245	0.042407
Cluster 2	GOCC name	cytoskeleton	4.1136e-05	1.9566	208	34	264	0.0034246
Cluster 2	GSEA	STEIN_ESRRA_TARGETS_UP	4.4035e-05	2.6342	93	19	245	0.043996
Cluster 2	GOCC name	organelle	4.6692e-05	1.1421	2258	200	245	0.0021202
Cluster 2	GSEA	GNF2_FBL	4.7896e-05	3.753	97	12	104	0.011671
Cluster 2	GOBP name	semaphorin-plexin signaling pathway	4.8151e-05	7.1818	10	6	264	0.011207
Cluster 2	GOCC name	site of polarized growth	4.8965e-05	3.5909	40	12	264	0.0037628
Cluster 2	GOBP name	taxis	5.0259e-05	2.7875	73	17	264	0.010988
Cluster 2	GOBP name	chemotaxis	5.0259e-05	2.7875	73	17	264	0.011332
Cluster 2	GOCC name	membrane	5.1842e-05	1.2382	1450	150	264	0.0036993
Cluster 2	GSEA	SASSON_RESPONSE_TO_FORSKOLIN_DN	5.7056e-05	4.1275	29	10	264	0.031669
Cluster 2	GSEA	OXIDOREDUCTASE_ACTIVITY	6.1765e-05	2.8653	72	16	245	0.047469
Cluster 2	GSEA	EXTRACELLULAR_SPACE	6.3516e-05	6.2391	22	7	161	0.048815
Cluster 2	GSEA	RNA_BINDING	6.4828e-05	3.0337	150	15	104	0.015421
Cluster 2	GOBP name	locomotion	6.9993e-05	1.9542	196	32	264	0.014429
Cluster 2	GSEA	MORF_RAN	7.7721e-05	3.146	135	14	104	0.018058
Cluster 2	GOBP name	cell recognition	9.7879e-05	4.7879	20	8	264	0.019086
Cluster 2	GOCC name	ribonucleoprotein complex	9.832e-05	2.2778	293	22	104	0.012278
Cluster 2	GSEA	JISON_SICKLE_CELL_DISEASE_DN	9.9284e-05	4.0995	74	10	104	0.022544
Cluster 2	GOCC name	cell junction	0.00010438	1.575	418	55	264	0.0061337
Cluster 2	GOBP name	cellular response to stimulus	0.00010885	1.3589	828	94	264	0.019634
Cluster 2	GOBP name	neurological system process	0.00011544	1.9835	175	29	264	0.020314
Cluster 2	GSEA	MARTENS_TRETINOIN_RESPONSE_DN	0.00012043	2.6312	196	17	104	0.026738
Cluster 2	GOCC name	high-density lipoprotein particle	0.0001303	19.609	3	3	161	0.0092976
Cluster 2	GOCC name	cell projection	0.00013314	1.56	422	55	264	0.0070005
Cluster 2	GOCC name	Golgi transport complex	0.00013483	22.752	4	3	104	0.014967
Cluster 2	GOBP name	cell motility	0.00013773	2.061	151	26	264	0.02366
Cluster 2	GSEA	PUJANA_BRCA1_PCC_NETWORK	0.00016123	1.7973	557	33	104	0.034272
Cluster 2	GOBP name	oxidation-reduction process	0.00017476	2.3785	103	19	245	0.042029
Cluster 2	GSEA	GSE10239_NAIVE_VS_KLRG1HIGH_EFF_CD8_TCELL_UP	0.00017773	4.7587	51	8	104	0.036994
Cluster 2	GOBP name	Ras protein signal transduction	0.00017936	2.7204	66	15	264	0.028757
Cluster 2	GOCC name	growth cone	0.00018121	3.3761	39	11	264	0.0090514
Cluster 2	GOCC name	CUL4 RING ubiquitin ligase complex	0.00019599	11.205	7	4	161	0.013053
Cluster 2	GOBP name	cell migration	0.0002325	2.0667	139	24	264	0.036467
Cluster 2	GOCC name	postsynaptic density	0.000263	2.8816	54	13	264	0.012511
Cluster 2	GOBP name	small GTPase mediated signal transduction	0.00030071	2.2742	100	19	264	0.046161
Cluster 2	GOBP name	multicellular organismal process	0.0003282	1.4962	448	56	264	0.049332
Cluster 2	GOCC name	mitochondrial intermembrane space	0.00032835	5.5259	14	6	245	0.013667
Cluster 2	GOCC name	intracellular membrane-bounded organelle	0.00040838	1.1708	1751	159	245	0.016319
Cluster 2	GOCC name	plasma membrane part	0.00048504	1.5455	364	47	264	0.019382
Cluster 2	GOCC name	fibrinogen complex	0.00049508	14.707	4	3	161	0.029093
Cluster 2	KEGG name	Galactose metabolism	0.00057705	11.97	3	3	264	0.047703
Cluster 2	GOCC name	ubiquitin ligase complex	0.00062201	4.4278	31	7	161	0.032704
Cluster 2	GOCC name	endoplasmic reticulum	0.00068389	1.8851	171	25	245	0.026277
Cluster 2	GOCC name	cell surface	0.00068723	2.6553	96	13	161	0.034327
Cluster 2	GOCC name	dynein complex	0.000776	5.8609	11	5	245	0.027687
Cluster 2	GOCC name	cytoskeletal part	0.00090729	1.5364	335	43	264	0.03357
Cluster 2	GOCC name	extracellular matrix	0.00092949	3.3298	53	9	161	0.044217
Cluster 2	GOCC name	organelle envelope lumen	0.0010675	4.5508	17	6	245	0.036772
Cluster 2	GOCC name	mitochondrial membrane part	0.0015266	3.3275	31	8	245	0.046216
Cluster 2	GOCC name	membrane	0.0017484	1.1746	1449	132	245	0.049904
Cluster 2	GOCC name	respiratory chain complex I	0.0018446	4.9592	13	5	245	0.048494
Cluster 2	GOCC name	NADH dehydrogenase complex	0.0018446	4.9592	13	5	245	0.049805
Cluster ID	Type	Name	P value	Enrichment	Total	In cluster	Cluster size	Benj. Hoch. FDR
Cluster 3	GOCC name	mitochondrion	7.0093e-23	2.9071	377	85	245	7.0023e-20
Cluster 3	GOCC name	mitochondrial part	3.4851e-18	3.6439	184	52	245	1.7408e-15
Cluster 3	GSEA	MOOTHA_MITOCHONDRIA	3.9402e-14	4.2153	104	34	245	3.9367e-10
Cluster 3	GOCC name	mitochondrial membrane	5.1643e-14	3.8786	123	37	245	1.7197e-11
Cluster 3	GSEA	MOOTHA_HUMAN_MITODB_6_2002	4.5043e-13	3.9142	112	34	245	2.2501e-09
Cluster 3	GOCC name	cytoplasmic part	1.7892e-12	1.446	1498	168	245	4.4684e-10
Cluster 3	GSEA	TRANSLATION	1.9196e-12	7.9139	69	18	104	1.9179e-08
Cluster 3	GSEA	MACROMOLECULE_BIOSYNTHETIC_PROCESS	6.9296e-12	6.8618	84	19	104	3.4617e-08
Cluster 3	GSEA	MORF_TPT1	4.7804e-11	7.1628	72	17	104	1.592e-07
Cluster 3	GSEA	REACTOME_TRANSLATION	1.2868e-10	6.2765	87	18	104	3.214e-07
Cluster 3	GSEA	CELLULAR_BIOSYNTHETIC_PROCESS	2.1192e-10	5.7069	101	19	104	4.2346e-07
Cluster 3	GSEA	MORF_ACTG1	4.1065e-10	5.8716	93	18	104	6.838e-07
Cluster 3	GOCC name	membrane-enclosed lumen	5.4578e-10	3.7036	94	27	245	1.0905e-07
Cluster 3	GSEA	BIOSYNTHETIC_PROCESS	6.4427e-10	5.0561	120	20	104	9.1956e-07
Cluster 3	GSEA	MITOCHONDRION	8.2173e-10	3.8837	83	25	245	2.7366e-06
Cluster 3	GSEA	MORF_NME2	9.3913e-10	5.9968	86	17	104	1.1729e-06
Cluster 3	GSEA	MORF_NPM1	9.7351e-10	5.2399	110	19	104	1.0807e-06
Cluster 3	GSEA	GNF2_EIF3S6	1.4195e-09	6.3037	77	16	104	1.4183e-06
Cluster 3	GOCC name	mitochondrial inner membrane	1.4287e-09	3.7923	85	25	245	2.3789e-07
Cluster 3	GOCC name	extracellular space	2.7512e-09	3.4102	161	28	161	2.7485e-06
Cluster 3	GSEA	STRUCTURAL_CONSTITUENT_OF_RIBOSOME	5.099e-09	7.5841	52	13	104	4.6313e-06
Cluster 3	GSEA	REACTOME_3_UTR_MEDIATED_TRANSLATIONAL_REGULATION	5.7044e-09	6.2335	73	15	104	4.7494e-06
Cluster 3	GOCC name	integral to membrane	6.4508e-09	1.8089	556	78	245	8.0555e-07
Cluster 3	GOCC name	organelle inner membrane	7.3523e-09	3.4208	98	26	245	8.1611e-07
Cluster 3	GOBP name	signal transduction	9.7844e-09	1.7621	557	82	264	7.0594e-06
Cluster 3	GSEA	REACTOME_METABOLISM_OF_PROTEINS	1.1632e-08	4.5385	127	19	104	8.9399e-06
Cluster 3	GOCC name	intrinsic to membrane	1.3897e-08	1.7603	586	80	245	1.3883e-06
Cluster 3	GSEA	REACTOME_SRP_DEPENDENT_COTRANSLATIONAL_PROTEIN_TARGETING_TO_MEMBRANE	1.5247e-08	6.339	67	14	104	1.0881e-05
Cluster 3	GSEA	GNF2_GLTSCR2	1.7305e-08	11.871	23	9	104	1.1526e-05
Cluster 3	GOMF name	peptidase inhibitor activity	1.7305e-08	11.871	23	9	104	1.8377e-05
Cluster 3	GOMF name	endopeptidase inhibitor activity	1.7305e-08	11.871	23	9	104	3.6755e-05
Cluster 3	GSEA	PECE_MAMMARY_STEM_CELL_DN	2.0656e-08	7.5841	48	12	104	1.2898e-05
Cluster 3	GOMF name	endopeptidase regulator activity	2.6848e-08	11.376	24	9	104	1.9008e-05
Cluster 3	GSEA	REACTOME_INFLUENZA_VIRAL_RNA_TRANSCRIPTION_AND_REPLICATION	2.7551e-08	6.0673	70	14	104	1.6192e-05
Cluster 3	GSEA	MODULE_83	3.0379e-08	4.072	149	20	104	1.6862e-05
Cluster 3	GSEA	KEGG_RIBOSOME	3.2689e-08	6.5729	60	13	104	1.7189e-05
Cluster 3	GOCC name	intracellular organelle lumen	3.333e-08	3.6367	78	22	245	3.027e-06
Cluster 3	GSEA	REACTOME_INFLUENZA_LIFE_CYCLE	3.9565e-08	5.0561	96	16	104	1.9765e-05
Cluster 3	KEGG name	Ribosome	4.032e-08	6.4652	61	13	104	9.9994e-06
Cluster 3	GSEA	REACTOME_PEPTIDE_CHAIN_ELONGATION	4.032e-08	6.4652	61	13	104	1.9183e-05
Cluster 3	GOMF name	structural constituent of ribosome	4.032e-08	6.4652	61	13	104	2.141e-05
Cluster 3	GSEA	CELLULAR_PROTEIN_METABOLIC_PROCESS	4.0444e-08	2.9804	285	28	104	1.8367e-05
Cluster 3	GOCC name	organelle lumen	4.2851e-08	3.5907	79	22	245	3.293e-06
Cluster 3	GSEA	MODULE_151	4.7638e-08	4.4037	124	18	104	2.0693e-05
Cluster 3	GSEA	CELLULAR_MACROMOLECULE_METABOLIC_PROCESS	5.0772e-08	2.9494	288	28	104	2.1136e-05
Cluster 3	GSEA	REACTOME_METABOLISM_OF_MRNA	9.5098e-08	4.7587	102	16	104	3.8005e-05
Cluster 3	GSEA	MORF_JUND	1.0687e-07	7.4156	45	11	104	4.1069e-05
Cluster 3	GSEA	MODULE_114	1.1252e-07	4.1684	131	18	104	4.1635e-05
Cluster 3	GSEA	REACTOME_NONSENSE_MEDIATED_DECAY_ENHANCED_BY_THE_EXON_JUNCTION_COMPLEX	1.5626e-07	5.7996	68	13	104	5.5759e-05
Cluster 3	GSEA	REACTOME_METABOLISM_OF_RNA	2.0035e-07	4.0151	136	18	104	6.9025e-05
Cluster 3	GOCC name	mitochondrial matrix	2.1349e-07	4.298	48	16	245	1.5234e-05
Cluster 3	GOBP name	cell surface receptor linked signaling pathway	2.3892e-07	2.0759	271	47	264	0.00012313
Cluster 3	GOMF name	peptidase regulator activity	2.4415e-07	9.101	30	9	104	0.00010372
Cluster 3	GSEA	PROTEIN_METABOLIC_PROCESS	3.8707e-07	2.6796	317	28	104	0.00012891
Cluster 3	GOCC name	plasma membrane	4.0181e-07	1.6181	614	83	264	8.0282e-05
Cluster 3	GOCC name	organelle membrane	6.1091e-07	1.6818	552	72	245	4.0686e-05
Cluster 3	GOBP name	translation	8.4841e-07	5.5157	66	12	104	0.0061213
Cluster 3	GSEA	EXTRACELLULAR_REGION	9.4154e-07	4.9022	52	13	161	0.0094069
Cluster 3	GSEA	WONG_MITOCHONDRIA_GENE_MODULE	1.2619e-06	3.8204	54	16	245	0.0025216
Cluster 3	GOMF name	structural molecule activity	1.2855e-06	3.5458	154	18	104	0.00045508
Cluster 3	GSEA	REACTOME_TCA_CYCLE_AND_RESPIRATORY_ELECTRON_TRANSPORT	1.5322e-06	4.5303	37	13	245	0.0025514
Cluster 3	GSEA	MORF_UBE2I	1.5346e-06	3.6837	140	17	104	0.00049459
Cluster 3	GSEA	HSIAO_LIVER_SPECIFIC_GENES	1.5374e-06	5.1153	46	12	161	0.00768
Cluster 3	GOBP name	actin cytoskeleton organization	2.1467e-06	2.4445	142	29	264	0.00073756
Cluster 3	GOBP name	regulation of mitochondrion organization	2.2094e-06	7.3679	14	8	245	0.0053136
Cluster 3	GSEA	MODULE_24	2.3214e-06	3.9747	74	15	161	0.007731
Cluster 3	GOCC name	extracellular region part	2.5319e-06	1.5803	881	71	161	0.0012647
Cluster 3	GSEA	CAR_HPX	2.7605e-06	11.765	10	6	161	0.0068951
Cluster 3	GOCC name	extracellular vesicular exosome	3.1286e-06	1.6278	783	65	161	0.00062509
Cluster 3	GOCC name	extracellular organelle	3.1286e-06	1.6278	783	65	161	0.00078137
Cluster 3	GOCC name	extracellular membrane-bounded organelle	3.1286e-06	1.6278	783	65	161	0.0010418
Cluster 3	GOCC name	ribosome	3.1525e-06	8.0897	30	8	104	0.0031493
Cluster 3	GSEA	OSMAN_BLADDER_CANCER_DN	3.6092e-06	3.6495	133	16	104	0.0011269
Cluster 3	GSEA	STRUCTURAL_MOLECULE_ACTIVITY	3.6737e-06	4.1234	103	14	104	0.0011122
Cluster 3	GOBP name	actin filament-based process	3.8024e-06	2.3775	146	29	264	0.001247
Cluster 3	GSEA	LI_AMPLIFIED_IN_LUNG_CANCER	4.39e-06	5.2141	64	11	104	0.00129
Cluster 3	GOCC name	membrane-bounded organelle	4.4566e-06	1.1856	2088	192	245	0.00023432
Cluster 3	GOCC name	cytosolic large ribosomal subunit	5.3225e-06	7.5841	32	8	104	0.0026586
Cluster 3	GOBP name	neuron recognition	6.1974e-06	7.6171	11	7	264	0.0019441
Cluster 3	GOCC name	aminoacyl-tRNA synthetase multienzyme complex	6.5272e-06	19.609	4	4	161	0.0010868
Cluster 3	GSEA	BIOCARTA_INTRINSIC_PATHWAY	6.5272e-06	19.609	4	4	161	0.010869
Cluster 3	GSEA	BIOCARTA_AMI_PATHWAY	6.5272e-06	19.609	4	4	161	0.013043
Cluster 3	GOCC name	blood microparticle	6.9745e-06	6.0855	29	9	161	0.00099536
Cluster 3	GOCC name	membrane-bounded vesicle	6.9791e-06	1.5384	905	71	161	0.00087151
Cluster 3	GSEA	GSE1460_CD4_THYMOCYTE_VS_THYMIC_STROMAL_CELL_DN	8.3333e-06	5.2996	37	10	161	0.011894
Cluster 3	GOMF name	enzyme inhibitor activity	8.5804e-06	5.4172	56	10	104	0.0026035
Cluster 3	GSEA	LEIN_CHOROID_PLEXUS_MARKERS	9.3152e-06	8.0742	17	7	161	0.011634
Cluster 3	GOCC name	endoplasmic reticulum part	9.7422e-06	2.3143	156	28	245	0.00048662
Cluster 3	GOCC name	large ribosomal subunit	1.0845e-05	6.9341	35	8	104	0.0036112
Cluster 3	GSEA	BILANGES_SERUM_AND_RAPAMYCIN_SENSITIVE_GENES	1.1459e-05	5.9354	46	9	104	0.003271
Cluster 3	GOBP name	response to stimulus	1.2272e-05	1.3348	1103	123	264	0.0035418
Cluster 3	GOBP name	regulation of protein secretion	1.2798e-05	6.5362	24	8	161	0.046171
Cluster 3	KEGG name	Axon guidance	1.2811e-05	3.5654	47	14	264	0.0031772
Cluster 3	GSEA	REACTOME_AXON_GUIDANCE	1.3951e-05	2.5257	109	23	264	0.017424
Cluster 3	GOCC name	cytosol	1.4075e-05	1.8991	413	40	161	0.0015623
Cluster 3	GOBP name	mitochondrion organization	1.5174e-05	3.5395	51	14	245	0.0091234
Cluster 3	GSEA	MODULE_32	1.5358e-05	3.2576	149	16	104	0.0042624
Cluster 3	GSEA	VANDESLUIS_COMMD1_TARGETS_GROUP_4_UP	1.5629e-05	12.255	8	5	161	0.01735
Cluster 3	GSEA	HSIAO_HOUSEKEEPING_GENES	1.8136e-05	2.9358	186	18	104	0.0048972
Cluster 3	GSEA	REACTOME_SIGNALING_BY_WNT	1.9385e-05	9.0502	13	6	161	0.019367
Cluster 3	GSEA	KEGG_AXON_GUIDANCE	2.1417e-05	3.4199	49	14	264	0.019452
Cluster 3	GOCC name	vesicle	2.18e-05	1.4906	934	71	161	0.0019798
Cluster 3	GSEA	GSE7852_THYMUS_VS_FAT_TCONV_UP	2.1892e-05	3.6187	43	13	264	0.018227
Cluster 3	GOMF name	serine-type endopeptidase inhibitor activity	2.2425e-05	12.64	12	5	104	0.0059537
Cluster 3	GOCC name	membrane part	2.7299e-05	1.3579	952	108	264	0.0027272
Cluster 3	GSEA	EXTRACELLULAR_REGION_PART	2.7465e-05	4.6687	42	10	161	0.024945
Cluster 3	GSEA	GSE22886_NAIVE_BCELL_VS_NEUTROPHIL_UP	2.8521e-05	4.7401	64	10	104	0.0074988
Cluster 3	GOCC name	membrane part	3.0142e-05	1.3723	949	101	245	0.0014339
Cluster 3	GSEA	MODULE_23	3.0944e-05	3.0759	102	16	161	0.025763
Cluster 3	GOBP name	regulation of heterotypic cell-cell adhesion	3.1011e-05	15.687	5	4	161	0.037291
Cluster 3	GOBP name	regulation of cell-cell adhesion involved in gastrulation	3.1011e-05	15.687	5	4	161	0.044749
Cluster 3	GSEA	CASORELLI_APL_SECONDARY_VS_DE_NOVO_DN	3.5453e-05	17.335	7	4	104	0.0090824
Cluster 3	GOBP name	cytoskeleton organization	3.5738e-05	1.9008	233	37	264	0.0085951
Cluster 3	GSEA	GCM_TPT1	3.7085e-05	5.1515	53	9	104	0.0092628
Cluster 3	GSEA	REACTOME_OPIOID_SIGNALLING	3.7286e-05	3.683	39	12	264	0.023283
Cluster 3	GOMF name	oxidoreductase activity	3.9931e-05	2.27	142	25	245	0.042407
Cluster 3	GOCC name	cytoskeleton	4.1136e-05	1.9566	208	34	264	0.0034246
Cluster 3	GSEA	STEIN_ESRRA_TARGETS_UP	4.4035e-05	2.6342	93	19	245	0.043996
Cluster 3	GOCC name	organelle	4.6692e-05	1.1421	2258	200	245	0.0021202
Cluster 3	GSEA	GNF2_FBL	4.7896e-05	3.753	97	12	104	0.011671
Cluster 3	GOBP name	semaphorin-plexin signaling pathway	4.8151e-05	7.1818	10	6	264	0.011207
Cluster 3	GOCC name	site of polarized growth	4.8965e-05	3.5909	40	12	264	0.0037628
Cluster 3	GOBP name	taxis	5.0259e-05	2.7875	73	17	264	0.010988
Cluster 3	GOBP name	chemotaxis	5.0259e-05	2.7875	73	17	264	0.011332
Cluster 3	GOCC name	membrane	5.1842e-05	1.2382	1450	150	264	0.0036993
Cluster 3	GSEA	SASSON_RESPONSE_TO_FORSKOLIN_DN	5.7056e-05	4.1275	29	10	264	0.031669
Cluster 3	GSEA	OXIDOREDUCTASE_ACTIVITY	6.1765e-05	2.8653	72	16	245	0.047469
Cluster 3	GSEA	EXTRACELLULAR_SPACE	6.3516e-05	6.2391	22	7	161	0.048815
Cluster 3	GSEA	RNA_BINDING	6.4828e-05	3.0337	150	15	104	0.015421
Cluster 3	GOBP name	locomotion	6.9993e-05	1.9542	196	32	264	0.014429
Cluster 3	GSEA	MORF_RAN	7.7721e-05	3.146	135	14	104	0.018058
Cluster 3	GOBP name	cell recognition	9.7879e-05	4.7879	20	8	264	0.019086
Cluster 3	GOCC name	ribonucleoprotein complex	9.832e-05	2.2778	293	22	104	0.012278
Cluster 3	GSEA	JISON_SICKLE_CELL_DISEASE_DN	9.9284e-05	4.0995	74	10	104	0.022544
Cluster 3	GOCC name	cell junction	0.00010438	1.575	418	55	264	0.0061337
Cluster 3	GOBP name	cellular response to stimulus	0.00010885	1.3589	828	94	264	0.019634
Cluster 3	GOBP name	neurological system process	0.00011544	1.9835	175	29	264	0.020314
Cluster 3	GSEA	MARTENS_TRETINOIN_RESPONSE_DN	0.00012043	2.6312	196	17	104	0.026738
Cluster 3	GOCC name	high-density lipoprotein particle	0.0001303	19.609	3	3	161	0.0092976
Cluster 3	GOCC name	cell projection	0.00013314	1.56	422	55	264	0.0070005
Cluster 3	GOCC name	Golgi transport complex	0.00013483	22.752	4	3	104	0.014967
Cluster 3	GOBP name	cell motility	0.00013773	2.061	151	26	264	0.02366
Cluster 3	GSEA	PUJANA_BRCA1_PCC_NETWORK	0.00016123	1.7973	557	33	104	0.034272
Cluster 3	GOBP name	oxidation-reduction process	0.00017476	2.3785	103	19	245	0.042029
Cluster 3	GSEA	GSE10239_NAIVE_VS_KLRG1HIGH_EFF_CD8_TCELL_UP	0.00017773	4.7587	51	8	104	0.036994
Cluster 3	GOBP name	Ras protein signal transduction	0.00017936	2.7204	66	15	264	0.028757
Cluster 3	GOCC name	growth cone	0.00018121	3.3761	39	11	264	0.0090514
Cluster 3	GOCC name	CUL4 RING ubiquitin ligase complex	0.00019599	11.205	7	4	161	0.013053
Cluster 3	GOBP name	cell migration	0.0002325	2.0667	139	24	264	0.036467
Cluster 3	GOCC name	postsynaptic density	0.000263	2.8816	54	13	264	0.012511
Cluster 3	GOBP name	small GTPase mediated signal transduction	0.00030071	2.2742	100	19	264	0.046161
Cluster 3	GOBP name	multicellular organismal process	0.0003282	1.4962	448	56	264	0.049332
Cluster 3	GOCC name	mitochondrial intermembrane space	0.00032835	5.5259	14	6	245	0.013667
Cluster 3	GOCC name	intracellular membrane-bounded organelle	0.00040838	1.1708	1751	159	245	0.016319
Cluster 3	GOCC name	plasma membrane part	0.00048504	1.5455	364	47	264	0.019382
Cluster 3	GOCC name	fibrinogen complex	0.00049508	14.707	4	3	161	0.029093
Cluster 3	KEGG name	Galactose metabolism	0.00057705	11.97	3	3	264	0.047703
Cluster 3	GOCC name	ubiquitin ligase complex	0.00062201	4.4278	31	7	161	0.032704
Cluster 3	GOCC name	endoplasmic reticulum	0.00068389	1.8851	171	25	245	0.026277
Cluster 3	GOCC name	cell surface	0.00068723	2.6553	96	13	161	0.034327
Cluster 3	GOCC name	dynein complex	0.000776	5.8609	11	5	245	0.027687
Cluster 3	GOCC name	cytoskeletal part	0.00090729	1.5364	335	43	264	0.03357
Cluster 3	GOCC name	extracellular matrix	0.00092949	3.3298	53	9	161	0.044217
Cluster 3	GOCC name	organelle envelope lumen	0.0010675	4.5508	17	6	245	0.036772
Cluster 3	GOCC name	mitochondrial membrane part	0.0015266	3.3275	31	8	245	0.046216
Cluster 3	GOCC name	membrane	0.0017484	1.1746	1449	132	245	0.049904
Cluster 3	GOCC name	respiratory chain complex I	0.0018446	4.9592	13	5	245	0.048494
Cluster 3	GOCC name	NADH dehydrogenase complex	0.0018446	4.9592	13	5	245	0.049805
