# Supplementary material for: An efficient method for high-pH peptide fractionation based on C18 StageTips for in-depth proteome profiling
Source: Royal Society of Chemistry journal article supplement (doi:10.1039/c9ay01269a), 2019-01-01
Supplement: c9ay01269a4.xlsx [file c9ay01269a4.xlsx]

## Sheet: supplementary_table_S2
Supplementary Table S2. List of identified protein groups in preliminary experiment 2. This list includes the Uniprot accession nubmer, official gene symbol, and protein name of the identified protein groups. Searh results from Maxquant are also described.
No.	Protein IDs	Majority protein IDs	Protein names	Gene names	Fasta headers	Intensity C18AQ_AH	Intensity R2_AF	Intensity R2_AH	iBAQ	iBAQ C18AQ_AH	iBAQ R2_AF	iBAQ R2_AH	LFQ intensity C18AQ_AH	LFQ intensity R2_AF	LFQ intensity R2_AH	Peptides	Razor + unique peptides	Unique peptides	Sequence coverage [%]	Unique + razor sequence coverage [%]	Unique sequence coverage [%]	Mol. weight [kDa]	Q-value	Score	Intensity	MS/MS count	Number of proteins	Peptides C18AQ_AH	Peptides R2_AF	Peptides R2_AH	Razor + unique peptides C18AQ_AH	Razor + unique peptides R2_AF	Razor + unique peptides R2_AH	Unique peptides C18AQ_AH	Unique peptides R2_AF	Unique peptides R2_AH	Sequence coverage C18AQ_AH [%]	Sequence coverage R2_AF [%]	Sequence coverage R2_AH [%]	MS/MS count C18AQ_AH	MS/MS count R2_AF	MS/MS count R2_AH
1	A0A024QZX5;A0A087X1N8;P35237	A0A024QZX5;A0A087X1N8;P35237	Serpin B6	SERPINB6	tr|A0A024QZX5|A0A024QZX5_HUMAN Serpin B6 OS=Homo sapiens GN=SERPINB6 PE=1 SV=1;tr|A0A087X1N8|A0A087X1N8_HUMAN Serpin B6 OS=Homo sapiens GN=SERPINB6 PE=1 SV=1;sp|P35237|SPB6_HUMAN Serpin B6 OS=Homo sapiens GN=SERPINB6 PE=1 SV=3	446270000	165530000	377060000	41203000	18595000	6897200	15711000	344940000	396600000	347720000	9	9	9	30.5	30.5	30.5	43.024	0	48.461	988870000	12	3	6	5	5	6	5	5	6	5	5	21.6	18.7	16.1	6	3	3
2	A0A087WZA9;A0A024R4K9;A0A087X266;Q9BXJ8-2;Q9BXJ8;A0A087WV11	A0A087WZA9;A0A024R4K9;A0A087X266;Q9BXJ8-2;Q9BXJ8	Transmembrane protein 120A	TMEM120A;TMPIT	tr|A0A087WZA9|A0A087WZA9_HUMAN Transmembrane protein 120A (Fragment) OS=Homo sapiens GN=TMEM120A PE=4 SV=1;tr|A0A024R4K9|A0A024R4K9_HUMAN Transmembrane protein 120A OS=Homo sapiens GN=TMPIT PE=4 SV=1;tr|A0A087X266|A0A087X266_HUMAN Transmembrane protein 120	2003100000	706740000	1985600000	391290000	166920000	58895000	165470000	1604700000	1865600000	1852500000	10	10	10	58	58	58	20.459	0	59.392	4695400000	39	6	7	5	10	7	5	10	7	5	10	34.5	27	58	15	9	15
3	A0A024R571;Q9H4M9;C9JC03;C9J2Z4;C9JDQ8;Q9NZN3;C9JIJ3;C9IZH1;Q9NZN3-2;Q9NZN4	A0A024R571;Q9H4M9;C9JC03;C9J2Z4	EH domain-containing protein 1	EHD1	tr|A0A024R571|A0A024R571_HUMAN EH domain-containing protein 1 OS=Homo sapiens GN=EHD1 PE=1 SV=1;sp|Q9H4M9|EHD1_HUMAN EH domain-containing protein 1 OS=Homo sapiens GN=EHD1 PE=1 SV=2;tr|C9JC03|C9JC03_HUMAN EH domain-containing protein 1 (Fragment) OS=Homo s	1281800000	206540000	668190000	65350000	38843000	6258800	20248000	981340000	585940000	600700000	18	18	16	40.3	40.3	37.4	61.927	0	48.267	2156600000	30	10	13	7	11	13	7	11	11	7	11	29.9	18.8	30.5	14	8	8
4	K7EN05;K7EPC8;A0A024R7E8;K7EQ44;K7EMV4;P60002	K7EN05;K7EPC8;A0A024R7E8;K7EQ44;K7EMV4;P60002	Transcription elongation factor 1 homolog	ELOF1	tr|K7EN05|K7EN05_HUMAN Transcription elongation factor 1 homolog OS=Homo sapiens GN=ELOF1 PE=4 SV=1;tr|K7EPC8|K7EPC8_HUMAN Transcription elongation factor 1 homolog OS=Homo sapiens GN=ELOF1 PE=4 SV=1;tr|A0A024R7E8|A0A024R7E8_HUMAN Elongation factor 1 homol	40234000	0	14054000	54288000	40233000	0	14054000	28887000	0	12118000	1	1	1	23.7	23.7	23.7	8.6531	0.010025	1.3984	54288000	2	6	1	0	1	1	0	1	1	0	1	23.7	0	23.7	1	0	1
5	A0A024R7W5;A0A087X0Q1;A0A087WY31;Q7Z739	A0A024R7W5;A0A087X0Q1;A0A087WY31;Q7Z739	YTH domain-containing family protein 3	YTHDF3	tr|A0A024R7W5|A0A024R7W5_HUMAN YTH domain family, member 3, isoform CRA_a OS=Homo sapiens GN=YTHDF3 PE=1 SV=1;tr|A0A087X0Q1|A0A087X0Q1_HUMAN YTH domain-containing family protein 3 OS=Homo sapiens GN=YTHDF3 PE=1 SV=1;tr|A0A087WY31|A0A087WY31_HUMAN YTH domai	110090000	0	41832000	7234200	5242200	0	1992000	73422000	0	0	6	3	2	13.1	8.4	5.8	58.311	0	6.5919	151920000	3	4	3	2	1	2	0	1	1	0	1	6.7	3.4	3	2	0	1
6	B4DMT1;A0A087X2F1;A0A024RCN4;Q16670-2;Q16670	B4DMT1;A0A087X2F1;A0A024RCN4;Q16670-2;Q16670	Zinc finger and SCAN domain-containing protein 26	ZSCAN26;ZNF187	tr|B4DMT1|B4DMT1_HUMAN Zinc finger and SCAN domain-containing protein 26 OS=Homo sapiens GN=ZSCAN26 PE=2 SV=1;tr|A0A087X2F1|A0A087X2F1_HUMAN Zinc finger and SCAN domain-containing protein 26 OS=Homo sapiens GN=ZSCAN26 PE=4 SV=1;tr|A0A024RCN4|A0A024RCN4_HUM	0	0	9665600	439340	0	0	439340	0	0	10607000	1	1	1	4.8	4.8	4.8	31.483	0.0025869	2.0441	9665600	1	5	0	0	1	0	0	1	0	0	1	0	0	4.8	0	0	1
7	A0A075B6F3;Q96JB1-2;Q96JB1;H0Y7V4	A0A075B6F3;Q96JB1-2;Q96JB1;H0Y7V4	Dynein heavy chain 8, axonemal	DNAH8	tr|A0A075B6F3|A0A075B6F3_HUMAN Dynein heavy chain 8, axonemal OS=Homo sapiens GN=DNAH8 PE=1 SV=2;sp|Q96JB1-2|DYH8_HUMAN Isoform 2 of Dynein heavy chain 8, axonemal OS=Homo sapiens GN=DNAH8;sp|Q96JB1|DYH8_HUMAN Dynein heavy chain 8, axonemal OS=Homo sapiens	3139000000	1260500000	1816400000	21071000	10641000	4272800	6157400	2257100000	1921600000	1787500000	3	3	3	0.7	0.7	0.7	538.59	0.00034977	3.2971	6215900000	17	4	2	3	2	2	3	2	2	3	2	0.4	0.7	0.4	3	6	8
8	A0A087WV90;E9PDN5;A0A087WTU7;A0A075B6G3;P11532-4;P11532;P11532-3;P11532-2;H0Y304;E7EQR9;E7EQS5;F8VX32;E7ESB2;F5GZY3	A0A087WV90;E9PDN5;A0A087WTU7;A0A075B6G3;P11532-4;P11532;P11532-3;P11532-2;H0Y304;E7EQR9;E7EQS5;F8VX32;E7ESB2;F5GZY3	Dystrophin	DMD	tr|A0A087WV90|A0A087WV90_HUMAN Dystrophin OS=Homo sapiens GN=DMD PE=1 SV=1;tr|E9PDN5|E9PDN5_HUMAN Dystrophin OS=Homo sapiens GN=DMD PE=1 SV=1;tr|A0A087WTU7|A0A087WTU7_HUMAN Dystrophin OS=Homo sapiens GN=DMD PE=1 SV=1;tr|A0A075B6G3|A0A075B6G3_HUMAN Dystroph	1012300000	199160000	703640000	8254600	4363200	858450	3032900	908000000	507230000	688060000	20	16	2	6.4	5.6	0.7	426.09	0	111.1	1915100000	37	14	14	8	14	11	6	11	2	0	0	4.8	2.3	5	14	8	15
9	B1AM64;Q5T409;A0A087WYX6;A0A075B6Q7;Q9NRI5-2;Q9NRI5	B1AM64;Q5T409;A0A087WYX6;A0A075B6Q7;Q9NRI5-2;Q9NRI5	Disrupted in schizophrenia 1 protein	DISC1	tr|B1AM64|B1AM64_HUMAN Disrupted in schizophrenia 1 protein (Fragment) OS=Homo sapiens GN=DISC1 PE=4 SV=1;tr|Q5T409|Q5T409_HUMAN Disrupted in schizophrenia 1 protein OS=Homo sapiens GN=DISC1 PE=4 SV=2;tr|A0A087WYX6|A0A087WYX6_HUMAN Disrupted in schizophren	5914500	0	13971000	2209400	657170	0	1552300	7368800	0	11406000	1	1	1	13	13	13	10.541	0.0052406	1.7601	19885000	1	6	1	0	1	1	0	1	1	0	1	13	0	13	0	0	1
10	A0A075B746;P82921	A0A075B746;P82921	28S ribosomal protein S21, mitochondrial	MRPS21	tr|A0A075B746|A0A075B746_HUMAN 28S ribosomal protein S21, mitochondrial OS=Homo sapiens GN=MRPS21 PE=1 SV=1;sp|P82921|RT21_HUMAN 28S ribosomal protein S21, mitochondrial OS=Homo sapiens GN=MRPS21 PE=1 SV=2	803480000	259100000	841120000	380740000	160700000	51820000	168220000	722760000	564780000	632450000	4	4	4	46	46	46	10.688	0	10.771	1903700000	17	2	3	3	4	3	3	4	3	3	4	36.8	36.8	46	7	5	5
11	A0A075B759;Q9Y536;F5H284;A0A075B767;A2BFH1	A0A075B759;Q9Y536;F5H284;A0A075B767;A2BFH1	Peptidyl-prolyl cis-trans isomerase;Peptidyl-prolyl cis-trans isomerase A-like 4A/B/C;Peptidyl-prolyl cis-trans isomerase A-like 4D;Peptidyl-prolyl cis-trans isomerase A-like 4G	PPIAL4E;PPIAL4A;PPIAL4D;PPIAL4C;PPIAL4G	tr|A0A075B759|A0A075B759_HUMAN Protein PPIAL4E OS=Homo sapiens GN=PPIAL4F PE=4 SV=1;sp|Q9Y536|PAL4A_HUMAN Peptidyl-prolyl cis-trans isomerase A-like 4A/B/C OS=Homo sapiens GN=PPIAL4A PE=2 SV=1;sp|F5H284|PAL4D_HUMAN Peptidyl-prolyl cis-trans isomerase A-lik	0	64262000	0	4943200	0	4943200	0	0	162820000	0	4	1	1	32.9	16.5	16.5	18.197	1	-2	64262000	1	5	2	4	2	0	1	0	0	1	0	12.8	32.9	12.8	0	1	0
12	A0A075B773;O00623;K7ELY8	A0A075B773;O00623;K7ELY8	Peroxisome assembly protein 12	PEX12	tr|A0A075B773|A0A075B773_HUMAN Peroxisome assembly protein 12 OS=Homo sapiens GN=PEX12 PE=4 SV=1;sp|O00623|PEX12_HUMAN Peroxisome assembly protein 12 OS=Homo sapiens GN=PEX12 PE=1 SV=1;tr|K7ELY8|K7ELY8_HUMAN Peroxisome assembly protein 12 (Fragment) OS=Hom	174160000	0	59409000	11678000	8708000	0	2970500	116020000	0	48956000	4	4	4	18.4	18.4	18.4	40.683	0	12.754	233570000	6	3	4	0	1	4	0	1	4	0	1	18.4	0	4.2	5	0	1
13	A0A087WXA6;A0A087WT45;A0A075B793;Q4V328-4;Q4V328;Q4V328-3;Q4V328-2	A0A087WXA6;A0A087WT45;A0A075B793;Q4V328-4;Q4V328;Q4V328-3;Q4V328-2	GRIP1-associated protein 1	GRIPAP1	tr|A0A087WXA6|A0A087WXA6_HUMAN GRIP1-associated protein 1 (Fragment) OS=Homo sapiens GN=GRIPAP1 PE=1 SV=1;tr|A0A087WT45|A0A087WT45_HUMAN GRIP1-associated protein 1 OS=Homo sapiens GN=GRIPAP1 PE=1 SV=1;tr|A0A075B793|A0A075B793_HUMAN GRIP1-associated protein	19057000	0	13622000	1556100	907460	0	648680	17536000	0	0	2	2	2	13.9	13.9	13.9	35.029	0.00017756	3.5852	32679000	3	7	1	0	2	1	0	2	1	0	2	8.9	0	13.9	1	0	2
14	A0A075B7D9;Q92804-2;Q92804;A0A075B7F4	A0A075B7D9;Q92804-2;Q92804	TATA-binding protein-associated factor 2N	TAF15	tr|A0A075B7D9|A0A075B7D9_HUMAN TATA-binding protein-associated factor 2N OS=Homo sapiens GN=TAF15 PE=1 SV=1;sp|Q92804-2|RBP56_HUMAN Isoform Short of TATA-binding protein-associated factor 2N OS=Homo sapiens GN=TAF15;sp|Q92804|RBP56_HUMAN TATA-binding prote	1801900000	435780000	1599900000	182740000	85807000	20751000	76184000	978510000	1309900000	1421800000	7	5	5	21.8	18.7	18.7	48.839	0	32.376	3837600000	33	4	7	6	7	5	4	5	5	4	5	21.8	21.8	21.8	12	8	13
15	A0A087WSV0;Q9HB09;Q9HB09-3;I6LJZ7;M0QZM6;M0R1Z8;I6LJZ9	A0A087WSV0;Q9HB09;Q9HB09-3;I6LJZ7	Bcl-2-like protein 12	BCL2L12	tr|A0A087WSV0|A0A087WSV0_HUMAN Bcl-2-like protein 12 OS=Homo sapiens GN=BCL2L12 PE=4 SV=1;sp|Q9HB09|B2L12_HUMAN Bcl-2-like protein 12 OS=Homo sapiens GN=BCL2L12 PE=1 SV=1;sp|Q9HB09-3|B2L12_HUMAN Isoform 3 of Bcl-2-like protein 12 OS=Homo sapiens GN=BCL2L12	124020000	70304000	41786000	14757000	7751500	4394000	2611600	163070000	126060000	30726000	6	6	6	30.8	30.8	30.8	26.907	0	11.502	236110000	10	7	5	3	3	5	3	3	5	3	3	24.8	15.2	17.2	5	3	2
16	V9HW75;A0A087WSV8;P80303-2;P80303;Q2L696;E9PKG6;E9PLR0;E9PLE9;H0YEG8;H0YD18;E9PM22;E9PJP3	V9HW75;A0A087WSV8;P80303-2;P80303;Q2L696;E9PKG6;E9PLR0;E9PLE9	Nucleobindin-2;Nesfatin-1	HEL-S-109;NUCB2;Nucb2	tr|V9HW75|V9HW75_HUMAN Epididymis secretory protein Li 109 OS=Homo sapiens GN=HEL-S-109 PE=2 SV=1;tr|A0A087WSV8|A0A087WSV8_HUMAN Nucleobindin 2, isoform CRA_b OS=Homo sapiens GN=NUCB2 PE=4 SV=1;sp|P80303-2|NUCB2_HUMAN Isoform 2 of Nucleobindin-2 OS=Homo sa	1743400000	1235800000	1614100000	191380000	72640000	51490000	67253000	1979900000	1891700000	1940100000	17	16	16	47.1	45.2	45.2	50.222	0	43.807	4593200000	49	12	14	11	13	13	10	12	13	10	12	38.6	32.6	40.2	16	17	16
17	E9PIR7;F8W809;A0A087WSW9;E9PNQ6;A0A087WSY9;Q16881-5;Q16881-2;Q16881-4;Q16881-3;Q16881-6;Q16881;E2QRB9;Q16881-7;E9PKD3;E9PIZ5;E9PLT3;E9PKI4;E9PQI3	E9PIR7;F8W809;A0A087WSW9;E9PNQ6;A0A087WSY9;Q16881-5;Q16881-2;Q16881-4;Q16881-3;Q16881-6;Q16881;E2QRB9;Q16881-7;E9PKD3	Thioredoxin reductase 1, cytoplasmic	TXNRD1	tr|E9PIR7|E9PIR7_HUMAN Thioredoxin reductase 1, cytoplasmic OS=Homo sapiens GN=TXNRD1 PE=3 SV=1;tr|F8W809|F8W809_HUMAN Thioredoxin reductase 1, cytoplasmic OS=Homo sapiens GN=TXNRD1 PE=4 SV=1;tr|A0A087WSW9|A0A087WSW9_HUMAN Thioredoxin reductase 1, cytoplas	938860000	159200000	291480000	49626000	33531000	5685700	10410000	586750000	455830000	323810000	12	11	11	44.6	41.5	41.5	53.166	0	71.712	1389500000	28	18	10	6	7	9	5	6	9	5	6	41.3	21	29.5	13	6	9
18	K7ERP4;A0A087X2I2;A0A087WT12;P36969-2;P36969;R4GNE4;K7ENB4;K7EKX7;K7EJ20;A0A087X247	K7ERP4;A0A087X2I2;A0A087WT12;P36969-2;P36969;R4GNE4;K7ENB4;K7EKX7;K7EJ20	Glutathione peroxidase;Phospholipid hydroperoxide glutathione peroxidase, mitochondrial	GPX4	tr|K7ERP4|K7ERP4_HUMAN Glutathione peroxidase (Fragment) OS=Homo sapiens GN=GPX4 PE=1 SV=1;tr|A0A087X2I2|A0A087X2I2_HUMAN Phospholipid hydroperoxide glutathione peroxidase, mitochondrial OS=Homo sapiens GN=GPX4 PE=1 SV=1;tr|A0A087WT12|A0A087WT12_HUMAN Phos	111150000	0	101590000	16365000	8549800	0	7814900	105490000	0	93843000	3	3	3	20.6	20.6	20.6	17.629	0.00017683	3.5222	212740000	4	10	2	0	3	2	0	3	2	0	3	16.8	0	20.6	2	0	2
19	A0A087WT18;Q96A73-2;Q96A73;Q96A73-3	A0A087WT18;Q96A73-2;Q96A73;Q96A73-3	Putative monooxygenase p33MONOX	KIAA1191	tr|A0A087WT18|A0A087WT18_HUMAN Putative monooxygenase p33MONOX OS=Homo sapiens GN=KIAA1191 PE=1 SV=1;sp|Q96A73-2|P33MX_HUMAN Isoform 2 of Putative monooxygenase p33MONOX OS=Homo sapiens GN=KIAA1191;sp|Q96A73|P33MX_HUMAN Putative monooxygenase p33MONOX OS=H	38638000	8211100	18852000	4380100	2575900	547400	1256800	30424000	0	0	4	4	4	31.2	31.2	31.2	24.51	0.0064587	1.6388	65701000	4	4	2	1	1	2	1	1	2	1	1	17.9	8	5.4	2	1	1
20	A0A087WT20;Q9NV06;B3KME9;A0A087X1F8;E5RHM4;Q9NV06-2	A0A087WT20;Q9NV06	DDB1- and CUL4-associated factor 13	DCAF13	tr|A0A087WT20|A0A087WT20_HUMAN DDB1- and CUL4-associated factor 13 OS=Homo sapiens GN=DCAF13 PE=1 SV=1;sp|Q9NV06|DCA13_HUMAN DDB1- and CUL4-associated factor 13 OS=Homo sapiens GN=DCAF13 PE=1 SV=2	7432900000	2529400000	6336000000	370420000	168930000	57487000	144000000	6547500000	6192300000	6179000000	27	27	27	47.4	47.4	47.4	67.55	0	154.39	16298000000	121	6	24	17	19	24	17	19	24	17	19	44.9	34	39.2	41	38	42
21	A0A087WXZ1;A0A087WT22;E7ESS1;A0A087X1Q1;J3KP33;A0A087WZU8;P04637-8;P04637-9;P04637-7;P04637-5;P04637-6;P04637-2;P04637-3;P04637-4;P04637	A0A087WXZ1;A0A087WT22;E7ESS1;A0A087X1Q1;J3KP33;A0A087WZU8;P04637-8;P04637-9;P04637-7;P04637-5;P04637-6;P04637-2;P04637-3;P04637-4;P04637	Cellular tumor antigen p53	TP53	tr|A0A087WXZ1|A0A087WXZ1_HUMAN Cellular tumor antigen p53 OS=Homo sapiens GN=TP53 PE=1 SV=1;tr|A0A087WT22|A0A087WT22_HUMAN Cellular tumor antigen p53 OS=Homo sapiens GN=TP53 PE=1 SV=1;tr|E7ESS1|E7ESS1_HUMAN Cellular tumor antigen p53 (Fragment) OS=Homo sap	8393200	0	0	699430	699430	0	0	5961400	0	0	1	1	1	10.4	10.4	10.4	20.741	0	6.2917	8393200	1	15	1	0	0	1	0	0	1	0	0	10.4	0	0	1	0	0
22	A0A087WV67;A0A087WT23;O00124;O00124-3;A0A087WUA4;O00124-2;A0A087WWA4;A0A087X0J2	A0A087WV67;A0A087WT23;O00124;O00124-3;A0A087WUA4;O00124-2	UBX domain-containing protein 8	UBXN8	tr|A0A087WV67|A0A087WV67_HUMAN UBX domain-containing protein 8 OS=Homo sapiens GN=UBXN8 PE=1 SV=1;tr|A0A087WT23|A0A087WT23_HUMAN UBX domain-containing protein 8 OS=Homo sapiens GN=UBXN8 PE=1 SV=1;sp|O00124|UBXN8_HUMAN UBX domain-containing protein 8 OS=Hom	258950000	110540000	46301000	23099000	14386000	6140800	2572300	191110000	250470000	89746000	5	5	5	27.4	27.4	27.4	30.529	0	22.798	415790000	11	8	5	3	2	5	3	2	5	3	2	27.4	20	11.9	5	5	1
23	V9GYI1;A0A087WT39;A0A087WZP9	V9GYI1;A0A087WT39;A0A087WZP9		LIME1	tr|V9GYI1|V9GYI1_HUMAN Lck-interacting transmembrane adapter 1 (Fragment) OS=Homo sapiens GN=LIME1 PE=4 SV=1;tr|A0A087WT39|A0A087WT39_HUMAN Lck-interacting transmembrane adapter 1 OS=Homo sapiens GN=LIME1 PE=4 SV=1;tr|A0A087WZP9|A0A087WZP9_HUMAN Lck-intera	19989000	0	47773000	22587000	6662900	0	15924000	24702000	0	33358000	2	2	2	42.7	42.7	42.7	13.488	0.00034734	3.1608	67762000	5	3	1	0	2	1	0	2	1	0	2	24.4	0	42.7	1	0	4
24	A0A087WT42;Q9NY64;H0Y7M6;Q5VVW5;Q5VVV6;Q5VVW0;Q5VVV3;Q5VVV5;Q5VVV4;Q5VVV9	A0A087WT42;Q9NY64;H0Y7M6;Q5VVW5;Q5VVV6;Q5VVW0;Q5VVV3;Q5VVV5;Q5VVV4;Q5VVV9	Solute carrier family 2, facilitated glucose transporter member 8	SLC2A8	tr|A0A087WT42|A0A087WT42_HUMAN Solute carrier family 2, (Facilitated glucose transporter) member 8, isoform CRA_c OS=Homo sapiens GN=SLC2A8 PE=1 SV=1;sp|Q9NY64|GTR8_HUMAN Solute carrier family 2, facilitated glucose transporter member 8 OS=Homo sapiens GN=	62701000	8258100	75591000	12213000	5225100	688170	6299300	60040000	27905000	49420000	2	2	2	6.1	6.1	6.1	34.365	0.0001806	3.9826	146550000	3	10	1	1	2	1	1	2	1	1	2	3.8	3.8	6.1	1	0	2
25	H0YCJ2;A0A087WW73;A0A087WT80;Q9NQ66-2;Q9NQ66;Q8IV92	H0YCJ2;A0A087WW73;A0A087WT80;Q9NQ66-2;Q9NQ66;Q8IV92	Phosphoinositide phospholipase C;1-phosphatidylinositol 4,5-bisphosphate phosphodiesterase beta-1	PLCB1	tr|H0YCJ2|H0YCJ2_HUMAN Phosphoinositide phospholipase C (Fragment) OS=Homo sapiens GN=PLCB1 PE=4 SV=1;tr|A0A087WW73|A0A087WW73_HUMAN 1-phosphatidylinositol 4,5-bisphosphate phosphodiesterase beta-1 OS=Homo sapiens GN=PLCB1 PE=4 SV=1;tr|A0A087WT80|A0A087WT8	22792000	10132000	16667000	1127100	517990	230280	378810	0	27956000	0	3	3	3	3.5	3.5	3.5	104.02	0.0003387	2.7899	49591000	3	6	1	1	1	1	1	1	1	1	1	1.2	1.1	1.2	1	1	1
26	A0A087WT99;Q9H0W9-3;Q9H0W9-2;Q9H0W9;E9PJU8;E9PQS1;Q9H0W9-4;E9PR95;E9PSC3;E9PLC5;E9PLB3;E9PIP1;E9PPB5	A0A087WT99;Q9H0W9-3;Q9H0W9-2;Q9H0W9;E9PJU8;E9PQS1;Q9H0W9-4	Ester hydrolase C11orf54	C11orf54	tr|A0A087WT99|A0A087WT99_HUMAN Ester hydrolase C11orf54 OS=Homo sapiens GN=C11orf54 PE=1 SV=1;sp|Q9H0W9-3|CK054_HUMAN Isoform 3 of Ester hydrolase C11orf54 OS=Homo sapiens GN=C11orf54;sp|Q9H0W9-2|CK054_HUMAN Isoform 2 of Ester hydrolase C11orf54 OS=Homo sa	61404000	41714000	141890000	16334000	4093600	2780900	9459200	98249000	105650000	108900000	3	3	3	14.1	14.1	14.1	28.683	0	9.4198	245010000	5	13	1	1	3	1	1	3	1	1	3	4.7	6.6	14.1	1	1	3
27	A0A087WTA5;Q9UI10-3;Q9UI10-2;H7C2L8	A0A087WTA5;Q9UI10-3;Q9UI10-2	Translation initiation factor eIF-2B subunit delta	EIF2B4	tr|A0A087WTA5|A0A087WTA5_HUMAN Translation initiation factor eIF-2B subunit delta OS=Homo sapiens GN=EIF2B4 PE=1 SV=1;sp|Q9UI10-3|EI2BD_HUMAN Isoform 3 of Translation initiation factor eIF-2B subunit delta OS=Homo sapiens GN=EIF2B4;sp|Q9UI10-2|EI2BD_HUMAN	21616000	0	21925000	1555000	771990	0	783030	21616000	0	24679000	13	1	1	39	3.8	3.8	57.495	0.00034548	3.0672	43540000	2	4	10	11	11	1	0	1	1	0	1	31.5	31.2	32.7	1	0	1
28	D6RCT6;A0A087WTC6;D6RIA0;D6R9E3;Q9BWT6	D6RCT6;A0A087WTC6;D6RIA0;D6R9E3;Q9BWT6	Meiotic nuclear division protein 1 homolog	MND1	tr|D6RCT6|D6RCT6_HUMAN Meiotic nuclear division protein 1 homolog (Fragment) OS=Homo sapiens GN=MND1 PE=1 SV=1;tr|A0A087WTC6|A0A087WTC6_HUMAN Meiotic nuclear division protein 1 homolog OS=Homo sapiens GN=MND1 PE=1 SV=1;tr|D6RIA0|D6RIA0_HUMAN Meiotic nuclea	84230000	0	35802000	17147000	12033000	0	5114600	59825000	0	40299000	1	1	1	9.8	9.8	9.8	11.544	0.00705	1.5766	120030000	2	5	1	0	1	1	0	1	1	0	1	9.8	0	9.8	1	0	1
29	A0A087WTC8;P86397	A0A087WTC8;P86397	Hydroxyacyl-thioester dehydratase type 2, mitochondrial	RPP14	tr|A0A087WTC8|A0A087WTC8_HUMAN Uncharacterized protein (Fragment) OS=Homo sapiens PE=4 SV=1;sp|P86397|HTD2_HUMAN Hydroxyacyl-thioester dehydratase type 2, mitochondrial OS=Homo sapiens GN=RPP14 PE=1 SV=1	49657000	0	130650000	60103000	16552000	0	43550000	54411000	0	91126000	1	1	1	36.8	36.8	36.8	8.803	0	6.1456	180310000	2	2	1	0	1	1	0	1	1	0	1	36.8	0	36.8	1	0	1
30	A0A087WTD7;A8MYJ1;Q12802-4;Q12802;Q12802-2;A0A087WY36	A0A087WTD7;A8MYJ1;Q12802-4;Q12802;Q12802-2;A0A087WY36	A-kinase anchor protein 13	AKAP13	tr|A0A087WTD7|A0A087WTD7_HUMAN A-kinase anchor protein 13 OS=Homo sapiens GN=AKAP13 PE=1 SV=1;tr|A8MYJ1|A8MYJ1_HUMAN A-kinase anchor protein 13 OS=Homo sapiens GN=AKAP13 PE=1 SV=3;sp|Q12802-4|AKP13_HUMAN Isoform 3 of A-kinase anchor protein 13 OS=Homo sapi	16342000	0	3282400	254870	212240	0	42628	11607000	0	0	2	2	2	1.7	1.7	1.7	161.18	0.0036936	1.9055	19625000	1	6	1	0	1	1	0	1	1	0	1	1.1	0	0.6	1	0	0
31	A0A087WTE1;P19823;Q5T985;Q5T987	A0A087WTE1;P19823;Q5T985	Inter-alpha-trypsin inhibitor heavy chain H2	ITIH2	tr|A0A087WTE1|A0A087WTE1_HUMAN Inter-alpha-trypsin inhibitor heavy chain H2 OS=Homo sapiens GN=ITIH2 PE=1 SV=1;sp|P19823|ITIH2_HUMAN Inter-alpha-trypsin inhibitor heavy chain H2 OS=Homo sapiens GN=ITIH2 PE=1 SV=2;tr|Q5T985|Q5T985_HUMAN Inter-alpha-trypsin	9875800000	3982600000	10228000000	481730000	197520000	79653000	204560000	10140000000	8896900000	8710200000	42	42	34	58.4	58.4	50.3	106.66	0	269.66	24087000000	213	4	35	27	36	35	27	36	28	21	30	53.8	39.3	54.4	67	66	80
32	A0A087WTH0;Q9UHY7;D6RA00;Q9UHY7-2	A0A087WTH0;Q9UHY7;D6RA00	Enolase-phosphatase E1	ENOPH1	tr|A0A087WTH0|A0A087WTH0_HUMAN Enolase-phosphatase E1 OS=Homo sapiens GN=ENOPH1 PE=1 SV=1;sp|Q9UHY7|ENOPH_HUMAN Enolase-phosphatase E1 OS=Homo sapiens GN=ENOPH1 PE=1 SV=1;tr|D6RA00|D6RA00_HUMAN Enolase-phosphatase E1 OS=Homo sapiens GN=ENOPH1 PE=1 SV=1	143940000	65292000	106250000	31548000	14394000	6529200	10625000	114500000	124820000	123410000	4	4	4	30.1	30.1	30.1	24.806	0	9.7414	315480000	8	4	2	3	3	2	3	3	2	3	3	11	20.1	24.7	2	3	3
33	A0A087WTK9	A0A087WTK9		ORAI1	tr|A0A087WTK9|A0A087WTK9_HUMAN Calcium release-activated calcium channel protein 1 OS=Homo sapiens GN=ORAI1 PE=4 SV=1	16198000	0	22766000	7792800	3239600	0	4553100	9318400	0	20300000	1	1	1	14.6	14.6	14.6	9.2246	0.00017569	3.3947	38964000	2	1	1	0	1	1	0	1	1	0	1	14.6	0	14.6	1	0	1
34	A0A087WTM1;Q9Y6N7-5;Q9Y6N7-4;Q9Y6N7-3;Q9Y6N7;Q9Y6N7-2;A0A087WZ85;Q9Y6N7-6;H7C545;H7C4Y7	A0A087WTM1;Q9Y6N7-5;Q9Y6N7-4;Q9Y6N7-3;Q9Y6N7;Q9Y6N7-2;A0A087WZ85;Q9Y6N7-6	Roundabout homolog 1	ROBO1	tr|A0A087WTM1|A0A087WTM1_HUMAN Roundabout homolog 1 OS=Homo sapiens GN=ROBO1 PE=1 SV=1;sp|Q9Y6N7-5|ROBO1_HUMAN Isoform 5 of Roundabout homolog 1 OS=Homo sapiens GN=ROBO1;sp|Q9Y6N7-4|ROBO1_HUMAN Isoform 4 of Roundabout homolog 1 OS=Homo sapiens GN=ROBO1;sp|	419840000	78564000	190320000	8718000	5314400	994480	2409100	180220000	228920000	318350000	13	13	13	14.6	14.6	14.6	175.85	0	49.351	688720000	29	10	12	5	7	12	5	7	12	5	7	13.3	5.4	7.8	15	6	8
35	A0A087WTM7;A8MUN2;G3V186;REV__H0YCZ2;REV__Q8NG31-2;REV__Q8NG31;Q9ULK0	A0A087WTM7		APOB	tr|A0A087WTM7|A0A087WTM7_HUMAN Apolipoprotein B-100 OS=Homo sapiens GN=APOB PE=1 SV=1	296840000	360380000	394340000	3782600	1067800	1296300	1418500	375960000	528060000	371080000	233	1	1	61.3	0.3	0.3	489.83	0	11.056	1051600000	10	7	209	178	196	1	1	1	1	1	1	55.8	49.5	53.3	2	4	4
36	A0A087WTN3;A0A087WVA1;P62341;Q6IAK0;F8WBD0	A0A087WTN3;A0A087WVA1;P62341;Q6IAK0	Selenoprotein T	SELT	tr|A0A087WTN3|A0A087WTN3_HUMAN Selenoprotein T OS=Homo sapiens GN=SELT PE=4 SV=1;tr|A0A087WVA1|A0A087WVA1_HUMAN Selenoprotein T OS=Homo sapiens GN=SELT PE=4 SV=1;sp|P62341|SELT_HUMAN Selenoprotein T OS=Homo sapiens GN=SELT PE=2 SV=2;tr|Q6IAK0|Q6IAK0_HUMAN	297810000	158660000	351720000	89799000	33090000	17629000	39080000	300410000	313300000	345580000	5	5	5	38.9	38.9	38.9	18.826	0	13.501	808190000	14	5	4	3	3	4	3	3	4	3	3	30.9	27.2	26.5	6	4	4
37	A0A087WVR3;A0A087WTW0;Q96T88;Q96T88-2;A0A087WWG9	A0A087WVR3;A0A087WTW0;Q96T88;Q96T88-2;A0A087WWG9	E3 ubiquitin-protein ligase UHRF1	UHRF1	tr|A0A087WVR3|A0A087WVR3_HUMAN E3 ubiquitin-protein ligase UHRF1 OS=Homo sapiens GN=UHRF1 PE=1 SV=1;tr|A0A087WTW0|A0A087WTW0_HUMAN E3 ubiquitin-protein ligase UHRF1 OS=Homo sapiens GN=UHRF1 PE=1 SV=1;sp|Q96T88|UHRF1_HUMAN E3 ubiquitin-protein ligase UHRF1	2780400000	661200000	2364000000	129010000	61786000	14693000	52534000	2307400000	1871700000	1713100000	30	30	28	46.5	46.5	44.4	91.099	0	196.1	5805600000	87	5	21	17	25	21	17	25	20	16	23	34.1	28.9	38	30	18	39
38	A0A087WTX2;Q92504;A2AAT0	A0A087WTX2;Q92504;A2AAT0	Zinc transporter SLC39A7	SLC39A7	tr|A0A087WTX2|A0A087WTX2_HUMAN Zinc transporter SLC39A7 OS=Homo sapiens GN=SLC39A7 PE=1 SV=1;sp|Q92504|S39A7_HUMAN Zinc transporter SLC39A7 OS=Homo sapiens GN=SLC39A7 PE=1 SV=2;tr|A2AAT0|A2AAT0_HUMAN Zinc transporter SLC39A7 (Fragment) OS=Homo sapiens GN=S	3894400000	1964700000	5073000000	1093200000	389440000	196470000	507300000	3502800000	3147700000	5334700000	2	2	2	3.3	3.3	3.3	46.393	0	49.848	10932000000	22	3	1	2	2	1	2	2	1	2	2	3.3	3.3	3.3	5	10	7
39	A0A087WU02;Q96RQ1;H0YI50;H0YI58;F8W0R1;F8VPA6;F8VR88;F8VUZ2;H0YHS0;H0YHJ8	A0A087WU02;Q96RQ1;H0YI50	Endoplasmic reticulum-Golgi intermediate compartment protein 2	ERGIC2	tr|A0A087WU02|A0A087WU02_HUMAN Endoplasmic reticulum-Golgi intermediate compartment protein 2 OS=Homo sapiens GN=ERGIC2 PE=4 SV=1;sp|Q96RQ1|ERGI2_HUMAN Endoplasmic reticulum-Golgi intermediate compartment protein 2 OS=Homo sapiens GN=ERGIC2 PE=1 SV=2;tr|H0	1133600000	213720000	735410000	99178000	53982000	10177000	35020000	635450000	506800000	733600000	9	9	9	31.6	31.6	31.6	43.432	0	45.143	2082700000	32	10	7	7	3	7	7	3	7	7	3	23.6	23.8	11.4	14	10	8
40	A0A087WU07;Q5TGZ0-2;Q5TGZ0;R4GMM1;R4GNA1	A0A087WU07;Q5TGZ0-2;Q5TGZ0;R4GMM1;R4GNA1	MICOS complex subunit MIC10	MINOS1;MINOS1-NBL1	tr|A0A087WU07|A0A087WU07_HUMAN MICOS complex subunit MIC10 OS=Homo sapiens GN=MINOS1 PE=1 SV=1;sp|Q5TGZ0-2|MIC10_HUMAN Isoform 2 of MICOS complex subunit MIC10 OS=Homo sapiens GN=MINOS1;sp|Q5TGZ0|MIC10_HUMAN MICOS complex subunit MIC10 OS=Homo sapiens GN=M	756970000	494170000	443750000	847440000	378480000	247090000	221870000	563450000	1210900000	626070000	2	2	2	24.2	24.2	24.2	7.036	0.0021094	2.1145	1694900000	4	5	1	2	1	1	2	1	1	2	1	12.9	24.2	12.9	1	2	1
41	A0A087WU31;P51790-4;P51790-5;P51790;E9PE15;P51790-2;H0Y8Z8	A0A087WU31;P51790-4;P51790-5;P51790;E9PE15;P51790-2	Chloride channel protein;H(+)/Cl(-) exchange transporter 3	CLCN3	tr|A0A087WU31|A0A087WU31_HUMAN H(+)/Cl(-) exchange transporter 3 OS=Homo sapiens GN=CLCN3 PE=4 SV=1;sp|P51790-4|CLCN3_HUMAN Isoform 3 of H(+)/Cl(-) exchange transporter 3 OS=Homo sapiens GN=CLCN3;sp|P51790-5|CLCN3_HUMAN Isoform 4 of H(+)/Cl(-) exchange tra	334960000	116960000	234230000	19604000	9570400	3341800	6692200	201530000	316120000	240500000	11	11	7	14.7	14.7	10.4	87.947	0	26.029	686150000	23	7	9	5	7	9	5	7	6	4	4	12.4	7.6	8.8	10	5	8
42	A0A087WX17;A0A087WU43;A0A087WXI5;P12830-2;P12830;J3QKP1;H3BNC6	A0A087WX17;A0A087WU43;A0A087WXI5;P12830-2;P12830;J3QKP1;H3BNC6	Cadherin-1;E-Cad/CTF1;E-Cad/CTF2;E-Cad/CTF3	CDH1	tr|A0A087WX17|A0A087WX17_HUMAN Cadherin-1 OS=Homo sapiens GN=CDH1 PE=1 SV=1;tr|A0A087WU43|A0A087WU43_HUMAN Cadherin-1 OS=Homo sapiens GN=CDH1 PE=1 SV=1;tr|A0A087WXI5|A0A087WXI5_HUMAN Cadherin-1 OS=Homo sapiens GN=CDH1 PE=1 SV=1;sp|P12830-2|CADH1_HUMAN Isof	12636000	26444000	0	1860900	601710	1259200	0	0	62230000	0	2	2	2	3.7	3.7	3.7	71.369	0.0044671	1.8328	39080000	2	7	1	1	0	1	1	0	1	1	0	2.8	0.9	0	1	1	0
43	A0A087WU53;Q9H0U3;Q9H0U3-2	A0A087WU53;Q9H0U3;Q9H0U3-2	Magnesium transporter protein 1	MAGT1	tr|A0A087WU53|A0A087WU53_HUMAN Magnesium transporter protein 1 OS=Homo sapiens GN=MAGT1 PE=1 SV=1;sp|Q9H0U3|MAGT1_HUMAN Magnesium transporter protein 1 OS=Homo sapiens GN=MAGT1 PE=1 SV=1;sp|Q9H0U3-2|MAGT1_HUMAN Isoform 2 of Magnesium transporter protein 1	4530500000	1751400000	3169000000	497420000	238440000	92180000	166790000	3435400000	4790400000	2891500000	10	10	10	23.2	23.2	23.2	41.531	0	90.023	9450900000	37	3	7	9	6	7	9	6	7	9	6	19.3	20.7	16.9	14	13	10
44	A0A087WU64;A6NMQ1;P09884	A0A087WU64;A6NMQ1;P09884	DNA polymerase;DNA polymerase alpha catalytic subunit	POLA1	tr|A0A087WU64|A0A087WU64_HUMAN DNA polymerase alpha catalytic subunit OS=Homo sapiens GN=POLA1 PE=1 SV=1;tr|A6NMQ1|A6NMQ1_HUMAN DNA polymerase OS=Homo sapiens GN=POLA1 PE=1 SV=1;sp|P09884|DPOLA_HUMAN DNA polymerase alpha catalytic subunit OS=Homo sapiens G	9919400	0	0	115340	115340	0	0	7045400	0	0	1	1	1	0.9	0.9	0.9	165.77	0.00017749	3.5834	9919400	1	3	1	0	0	1	0	0	1	0	0	0.9	0	0	1	0	0
45	A0A087WUA5;Q9H223	A0A087WUA5;Q9H223	EH domain-containing protein 4	EHD4	tr|A0A087WUA5|A0A087WUA5_HUMAN EH domain-containing protein 4 OS=Homo sapiens GN=EHD4 PE=1 SV=1;sp|Q9H223|EHD4_HUMAN EH domain-containing protein 4 OS=Homo sapiens GN=EHD4 PE=1 SV=1	64063000	79159000	78549000	6720300	1941300	2398800	2380300	42784000	244240000	59729000	7	5	5	15.7	12.8	12.8	61.113	0	11.795	221770000	8	2	5	2	3	3	2	3	3	2	3	10.9	4.8	6.9	3	2	3
46	A0A087WUB9;Q8WYA6;Q8WYA6-4;Q8WYA6-3;Q8WYA6-2;A2A2P1	A0A087WUB9;Q8WYA6;Q8WYA6-4;Q8WYA6-3;Q8WYA6-2	Beta-catenin-like protein 1	CTNNBL1	tr|A0A087WUB9|A0A087WUB9_HUMAN Beta-catenin-like protein 1 OS=Homo sapiens GN=CTNNBL1 PE=1 SV=1;sp|Q8WYA6|CTBL1_HUMAN Beta-catenin-like protein 1 OS=Homo sapiens GN=CTNNBL1 PE=1 SV=1;sp|Q8WYA6-4|CTBL1_HUMAN Isoform 4 of Beta-catenin-like protein 1 OS=Homo	1167000000	215990000	1002700000	85205000	41679000	7713900	35812000	1015800000	656380000	902460000	16	16	16	32.7	32.7	32.7	65.702	0	105.24	2385700000	43	6	11	4	12	11	4	12	11	4	12	26.1	9.9	23.4	18	7	18
47	A0A087WUC6;Q15005;E9PL01;E9PI68;E9PRB9;H0YE04	A0A087WUC6;Q15005;E9PL01;E9PI68;E9PRB9	Signal peptidase complex subunit 2	SPCS2	tr|A0A087WUC6|A0A087WUC6_HUMAN Signal peptidase complex subunit 2 OS=Homo sapiens GN=SPCS2 PE=1 SV=1;sp|Q15005|SPCS2_HUMAN Signal peptidase complex subunit 2 OS=Homo sapiens GN=SPCS2 PE=1 SV=3;tr|E9PL01|E9PL01_HUMAN Signal peptidase complex subunit 2 OS=Ho	7409600000	1775300000	6540300000	1123200000	529260000	126810000	467160000	5080500000	5107300000	5879700000	15	15	15	57.7	57.7	57.7	25.09	0	323.31	15725000000	109	6	15	8	12	15	8	12	15	8	12	57.7	41	54.2	42	25	42
48	A0A087WUD1;Q6DD87	A0A087WUD1;Q6DD87	Zinc finger protein 787	ZNF787	tr|A0A087WUD1|A0A087WUD1_HUMAN Zinc finger protein 787 OS=Homo sapiens GN=ZNF787 PE=1 SV=1;sp|Q6DD87|ZN787_HUMAN Zinc finger protein 787 OS=Homo sapiens GN=ZNF787 PE=1 SV=3	1300900000	186100000	1094100000	122910000	61946000	8861900	52100000	726520000	719120000	880320000	12	12	12	46.6	46.6	46.6	40.428	0	110.01	2581100000	46	2	11	7	7	11	7	7	11	7	7	42.7	27.2	29.3	20	10	16
49	A0A087WUH0;P28715-3;P28715	A0A087WUH0;P28715-3;P28715	DNA repair protein complementing XP-G cells	ERCC5	tr|A0A087WUH0|A0A087WUH0_HUMAN DNA repair protein-complementing XP-G cells OS=Homo sapiens GN=ERCC5 PE=1 SV=1;sp|P28715-3|ERCC5_HUMAN Isoform 3 of DNA repair protein complementing XP-G cells OS=Homo sapiens GN=ERCC5;sp|P28715|ERCC5_HUMAN DNA repair protein	0	52903000	86894000	2329900	0	881710	1448200	0	124080000	109080000	1	1	1	1.3	1.3	1.3	133.11	0.00082413	2.3785	139800000	4	3	0	1	1	0	1	1	0	1	1	0	1.3	1.3	0	1	3
50	A0A087WUI1;Q9Y388;Q5JY83	A0A087WUI1;Q9Y388;Q5JY83	RNA-binding motif protein, X-linked 2	RBMX2	tr|A0A087WUI1|A0A087WUI1_HUMAN RNA-binding motif protein, X-linked 2 OS=Homo sapiens GN=RBMX2 PE=1 SV=1;sp|Q9Y388|RBMX2_HUMAN RNA-binding motif protein, X-linked 2 OS=Homo sapiens GN=RBMX2 PE=1 SV=2;tr|Q5JY83|Q5JY83_HUMAN RNA-binding motif protein, X-linke	37357000	29828000	635620000	58567000	3113100	2485700	52969000	208890000	350360000	258740000	2	2	2	7.3	7.3	7.3	31.576	0.004623	1.8069	702810000	4	3	1	1	2	1	1	2	1	1	2	4.4	4.4	7.3	1	1	2
51	A0A087WUI6;Q8WXW3;Q8WXW3-2	A0A087WUI6;Q8WXW3	Progesterone-induced-blocking factor 1	PIBF1	tr|A0A087WUI6|A0A087WUI6_HUMAN Progesterone-induced-blocking factor 1 OS=Homo sapiens GN=PIBF1 PE=4 SV=1;sp|Q8WXW3|PIBF1_HUMAN Progesterone-induced-blocking factor 1 OS=Homo sapiens GN=PIBF1 PE=1 SV=2	227320000	33924000	110330000	6518700	3988000	595160	1935500	132600000	0	170160000	5	5	5	7.6	7.6	7.6	83.137	0.00034489	3.0471	371560000	5	3	3	3	1	3	3	1	3	3	1	3.7	5.2	0.9	3	1	1
52	E9PG46;A0A087WUK0;Q2M2I8-2;Q2M2I8	E9PG46;A0A087WUK0;Q2M2I8-2;Q2M2I8	AP2-associated protein kinase 1	AAK1	tr|E9PG46|E9PG46_HUMAN AP2-associated protein kinase 1 OS=Homo sapiens GN=AAK1 PE=1 SV=1;tr|A0A087WUK0|A0A087WUK0_HUMAN AP2-associated protein kinase 1 OS=Homo sapiens GN=AAK1 PE=1 SV=1;sp|Q2M2I8-2|AAK1_HUMAN Isoform 2 of AP2-associated protein kinase 1 OS	153350000	22714000	104440000	8765700	4792100	709820	3263700	124530000	0	98312000	10	10	9	26	26	25.1	73.769	0	19.621	280500000	11	4	7	1	3	7	1	3	6	1	3	18.7	2.7	6.8	7	1	3
53	A0A087WUK2;O14979	A0A087WUK2;O14979	Heterogeneous nuclear ribonucleoprotein D-like	HNRNPDL	tr|A0A087WUK2|A0A087WUK2_HUMAN Heterogeneous nuclear ribonucleoprotein D-like OS=Homo sapiens GN=HNRNPDL PE=1 SV=1;sp|O14979|HNRDL_HUMAN Heterogeneous nuclear ribonucleoprotein D-like OS=Homo sapiens GN=HNRNPDL PE=1 SV=3	14294000000	7256100000	15360000000	1537900000	595570000	302340000	640000000	12737000000	15073000000	14073000000	21	21	6	47.7	47.7	23.4	40.04	0	177.14	36910000000	245	2	19	17	19	19	17	19	4	4	4	43.5	43.8	43	77	79	89
54	A0A087WZT0;A0A087WUK6;M0QZ22;Q5PRF9;M0QY61;M0R0X3	A0A087WZT0;A0A087WUK6;M0QZ22;Q5PRF9;M0QY61;M0R0X3	Protein Smaug homolog 2	SAMD4B	tr|A0A087WZT0|A0A087WZT0_HUMAN Protein Smaug homolog 2 OS=Homo sapiens GN=SAMD4B PE=1 SV=1;tr|A0A087WUK6|A0A087WUK6_HUMAN Protein Smaug homolog 2 OS=Homo sapiens GN=SAMD4B PE=1 SV=1;tr|M0QZ22|M0QZ22_HUMAN Protein Smaug homolog 2 OS=Homo sapiens GN=SAMD4B P	21953000	0	0	756990	756990	0	0	17361000	0	0	2	2	2	4.2	4.2	4.2	72.413	0.0011475	2.2949	21953000	2	6	2	0	0	2	0	0	2	0	0	4.2	0	0	2	0	0
55	A0A087WUL0;Q3LXA3;H0YCY6;Q3LXA3-2;I3L252;E9PJG8;E9PQR1	A0A087WUL0;Q3LXA3;H0YCY6;Q3LXA3-2	Bifunctional ATP-dependent dihydroxyacetone kinase/FAD-AMP lyase (cyclizing);ATP-dependent dihydroxyacetone kinase;FAD-AMP lyase (cyclizing)	TKFC;DAK	tr|A0A087WUL0|A0A087WUL0_HUMAN Bifunctional ATP-dependent dihydroxyacetone kinase/FAD-AMP lyase (cyclizing) OS=Homo sapiens GN=DAK PE=1 SV=1;sp|Q3LXA3|DHAK_HUMAN Bifunctional ATP-dependent dihydroxyacetone kinase/FAD-AMP lyase (cyclizing) OS=Homo sapiens G	9330900000	3265900000	7750900000	616600000	282760000	98968000	234880000	7649700000	7531500000	7181600000	26	26	26	61.5	61.5	61.5	59.057	0	248.16	20348000000	175	7	23	23	20	23	23	20	23	23	20	53.8	56.6	51.9	61	55	59
56	A0A087WUM0;A0A087X1F5;A0A087WYV9;P57105;A0A087WTA2	A0A087WUM0;A0A087X1F5;A0A087WYV9;P57105	Synaptojanin-2-binding protein	SYNJ2BP-COX16;SYNJ2BP	tr|A0A087WUM0|A0A087WUM0_HUMAN Protein SYNJ2BP-COX16 (Fragment) OS=Homo sapiens GN=SYNJ2BP-COX16 PE=4 SV=1;tr|A0A087X1F5|A0A087X1F5_HUMAN Protein SYNJ2BP-COX16 (Fragment) OS=Homo sapiens GN=SYNJ2BP-COX16 PE=4 SV=1;tr|A0A087WYV9|A0A087WYV9_HUMAN Protein SYN	1475200000	686590000	1542700000	336770000	134110000	62417000	140250000	1150100000	1793100000	1306100000	8	8	6	57.5	57.5	45.2	20.774	0	39.493	3704500000	48	5	6	6	6	6	6	6	6	5	5	45.2	44.6	47.3	14	18	16
57	A0A087WUQ6;P07203;P07203-2	A0A087WUQ6;P07203	Glutathione peroxidase;Glutathione peroxidase 1	GPX1	tr|A0A087WUQ6|A0A087WUQ6_HUMAN Glutathione peroxidase 1 OS=Homo sapiens GN=GPX1 PE=1 SV=1;sp|P07203|GPX1_HUMAN Glutathione peroxidase 1 OS=Homo sapiens GN=GPX1 PE=1 SV=4	253930000	66312000	229100000	42256000	19533000	5100900	17623000	245360000	162530000	195750000	7	7	7	46.5	46.5	46.5	21.938	0	22.082	549330000	11	3	4	4	5	4	4	5	4	4	5	19.8	28.2	33.2	3	4	4
58	E7ETK0;A0A087WUS0;P62847-2;P62847-3;P62847;P62847-4	E7ETK0;A0A087WUS0;P62847-2;P62847-3;P62847;P62847-4	40S ribosomal protein S24	RPS24	tr|E7ETK0|E7ETK0_HUMAN 40S ribosomal protein S24 OS=Homo sapiens GN=RPS24 PE=1 SV=1;tr|A0A087WUS0|A0A087WUS0_HUMAN 40S ribosomal protein S24 OS=Homo sapiens GN=RPS24 PE=1 SV=1;sp|P62847-2|RS24_HUMAN Isoform 2 of 40S ribosomal protein S24 OS=Homo sapiens GN	6017300000	2090300000	4565700000	1810500000	859620000	298610000	652240000	4902000000	3960500000	3601900000	6	6	6	40.5	40.5	40.5	15.197	0	23.523	12673000000	57	6	5	6	5	5	6	5	5	6	5	35.9	40.5	35.9	19	18	20
59	A0A087WUT6;O60841	A0A087WUT6;O60841	Eukaryotic translation initiation factor 5B	EIF5B	tr|A0A087WUT6|A0A087WUT6_HUMAN Eukaryotic translation initiation factor 5B OS=Homo sapiens GN=EIF5B PE=1 SV=1;sp|O60841|IF2P_HUMAN Eukaryotic translation initiation factor 5B OS=Homo sapiens GN=EIF5B PE=1 SV=4	4122500000	1269700000	2817600000	134590000	67582000	20815000	46191000	3100400000	3097300000	2713600000	26	26	26	32.3	32.3	32.3	138.68	0	133.56	8209900000	95	2	20	18	17	20	18	17	20	18	17	26.6	22.3	22.5	35	26	34
60	A0A087WUU9;P47974;G3V2D5;G3V2P5;Q07352	A0A087WUU9;P47974	Zinc finger protein 36, C3H1 type-like 2	ZFP36L2	tr|A0A087WUU9|A0A087WUU9_HUMAN Zinc finger protein 36, C3H1 type-like 2 OS=Homo sapiens GN=ZFP36L2 PE=1 SV=1;sp|P47974|TISD_HUMAN Zinc finger protein 36, C3H1 type-like 2 OS=Homo sapiens GN=ZFP36L2 PE=1 SV=3	69837000	0	38097000	5680700	3675600	0	2005100	43827000	0	39583000	3	3	3	9.6	9.6	9.6	51.047	0	9.9404	107930000	5	5	3	0	2	3	0	2	3	0	2	9.6	0	6.9	3	0	2
61	A0A087WUW9;Q9NXU5	A0A087WUW9;Q9NXU5	ADP-ribosylation factor-like protein 15	ARL15	tr|A0A087WUW9|A0A087WUW9_HUMAN ADP-ribosylation factor-like protein 15 OS=Homo sapiens GN=ARL15 PE=1 SV=1;sp|Q9NXU5|ARL15_HUMAN ADP-ribosylation factor-like protein 15 OS=Homo sapiens GN=ARL15 PE=1 SV=1	341600000	0	19558000	25797000	24400000	0	1397000	251480000	0	33148000	3	3	3	19.1	19.1	19.1	22.876	0	4.556	361160000	4	2	3	0	1	3	0	1	3	0	1	19.1	0	4.4	3	0	1
62	A0A087WUZ7;Q9Y5W8-2;Q9Y5W8	A0A087WUZ7;Q9Y5W8-2;Q9Y5W8	Sorting nexin-13	SNX13	tr|A0A087WUZ7|A0A087WUZ7_HUMAN Sorting nexin 13, isoform CRA_g OS=Homo sapiens GN=SNX13 PE=4 SV=1;sp|Q9Y5W8-2|SNX13_HUMAN Isoform 2 of Sorting nexin-13 OS=Homo sapiens GN=SNX13;sp|Q9Y5W8|SNX13_HUMAN Sorting nexin-13 OS=Homo sapiens GN=SNX13 PE=1 SV=4	16975000	0	0	346430	346430	0	0	13074000	0	0	2	2	2	2.4	2.4	2.4	102.37	0.0059984	1.6727	16975000	1	3	2	0	0	2	0	0	2	0	0	2.4	0	0	1	0	0
63	A0A087WV02;B4DRP8;A0A087WVP9;Q8TAF7-2;Q9Y2G7;Q8N141;Q9HCL3;Q8TAF7;P17039;P17039-2	A0A087WV02;B4DRP8;A0A087WVP9;Q8TAF7-2;Q9Y2G7;Q8N141;Q9HCL3;Q8TAF7;P17039;P17039-2	Zinc finger protein 461;Zinc finger protein 30 homolog;Zinc finger protein 82 homolog;Zinc finger protein 14 homolog;Zinc finger protein 30	ZNF461;ZFP30;ZFP82;ZFP14;ZNF30	tr|A0A087WV02|A0A087WV02_HUMAN Zinc finger protein 461 OS=Homo sapiens GN=ZNF461 PE=4 SV=1;tr|B4DRP8|B4DRP8_HUMAN Zinc finger protein 461 OS=Homo sapiens GN=ZNF461 PE=2 SV=1;tr|A0A087WVP9|A0A087WVP9_HUMAN Zinc finger protein 461 OS=Homo sapiens GN=ZNF461 P	37531000	0	23374000	3045200	1876500	0	1168700	37531000	0	26310000	1	1	1	8.5	8.5	8.5	30.27	0.0033795	1.9691	60905000	1	10	1	0	1	1	0	1	1	0	1	8.5	0	8.5	1	0	0
64	A0A087WV05;Q99417	A0A087WV05;Q99417	C-Myc-binding protein	MYCBP	tr|A0A087WV05|A0A087WV05_HUMAN Protein GJA9-MYCBP OS=Homo sapiens GN=GJA9-MYCBP PE=4 SV=1;sp|Q99417|MYCBP_HUMAN C-Myc-binding protein OS=Homo sapiens GN=MYCBP PE=1 SV=3	59237000	41598000	21987000	15353000	7404700	5199800	2748400	44791000	0	32343000	2	2	2	26.4	26.4	26.4	12.755	0.0066059	1.6255	122820000	3	2	1	1	1	1	1	1	1	1	1	8.2	18.2	8.2	1	1	1
65	A0A087WV22;H7C123;H7C2C5;H7C2U2	A0A087WV22;H7C123;H7C2C5		RPL10	tr|A0A087WV22|A0A087WV22_HUMAN 60S ribosomal protein L10 OS=Homo sapiens GN=RPL10 PE=1 SV=1;tr|H7C123|H7C123_HUMAN 60S ribosomal protein L10 (Fragment) OS=Homo sapiens GN=RPL10 PE=4 SV=1;tr|H7C2C5|H7C2C5_HUMAN 60S ribosomal protein L10 (Fragment) OS=Homo s	11648000	128930000	1790800000	193140000	1164800	12893000	179080000	12892000	507250000	1787300000	14	1	1	54.5	5.1	5.1	20.439	1	-2	1931400000	2	4	13	12	13	1	1	1	1	1	1	54.5	46.6	51.1	0	1	1
66	Q5T123;A0A087WV23;Q9H299	Q5T123;A0A087WV23;Q9H299	SH3 domain-binding glutamic acid-rich-like protein 3	SH3BGRL3	tr|Q5T123|Q5T123_HUMAN SH3 domain-binding glutamic acid-rich-like protein 3 OS=Homo sapiens GN=SH3BGRL3 PE=1 SV=1;tr|A0A087WV23|A0A087WV23_HUMAN SH3 domain-binding glutamic acid-rich-like protein 3 OS=Homo sapiens GN=SH3BGRL3 PE=1 SV=1;sp|Q9H299|SH3L3_HUMA	226280000	61752000	147250000	72546000	37713000	10292000	24541000	224910000	151660000	141980000	2	2	2	33	33	33	9.3804	0	6.6736	435280000	6	3	2	1	1	2	1	1	2	1	1	33	11.4	11.4	2	2	2
67	A0A087WV25;O95684-2;O95684	A0A087WV25;O95684-2;O95684	FGFR1 oncogene partner	FGFR1OP	tr|A0A087WV25|A0A087WV25_HUMAN FGFR1 oncogene partner OS=Homo sapiens GN=FGFR1OP PE=1 SV=1;sp|O95684-2|FR1OP_HUMAN Isoform 2 of FGFR1 oncogene partner OS=Homo sapiens GN=FGFR1OP;sp|O95684|FR1OP_HUMAN FGFR1 oncogene partner OS=Homo sapiens GN=FGFR1OP PE=1 S	47902000	7408000	9858400	3833400	2817800	435760	579900	26825000	0	21124000	3	3	3	14.2	14.2	14.2	38.099	0	15.694	65169000	6	3	2	1	1	2	1	1	2	1	1	9.1	5.1	6	4	1	1
68	A0A087WV34;Q8WWB7-2;Q8WWB7;X6R6A3;A0A087X0W3	A0A087WV34;Q8WWB7-2;Q8WWB7	Glycosylated lysosomal membrane protein	GLMP	tr|A0A087WV34|A0A087WV34_HUMAN Lysosomal protein NCU-G1 OS=Homo sapiens GN=C1orf85 PE=4 SV=1;sp|Q8WWB7-2|NCUG1_HUMAN Isoform 2 of Lysosomal protein NCU-G1 OS=Homo sapiens GN=C1orf85;sp|Q8WWB7|NCUG1_HUMAN Lysosomal protein NCU-G1 OS=Homo sapiens GN=C1orf85	556170000	201100000	453800000	151380000	69521000	25137000	56725000	538830000	444670000	575140000	3	3	3	17.8	17.8	17.8	34.576	0	32.404	1211100000	12	5	3	3	2	3	3	2	3	3	2	17.8	17.8	11.6	4	3	5
69	A0A087X1E5;A0A087WV46;C9JXA7;Q0VGL1	A0A087X1E5;A0A087WV46;C9JXA7;Q0VGL1	Ragulator complex protein LAMTOR4;Ragulator complex protein LAMTOR4, N-terminally processed	LAMTOR4	tr|A0A087X1E5|A0A087X1E5_HUMAN Ragulator complex protein LAMTOR4 OS=Homo sapiens GN=LAMTOR4 PE=1 SV=1;tr|A0A087WV46|A0A087WV46_HUMAN Ragulator complex protein LAMTOR4 OS=Homo sapiens GN=LAMTOR4 PE=1 SV=1;tr|C9JXA7|C9JXA7_HUMAN Ragulator complex protein LAM	280840000	124650000	184070000	294780000	140420000	62327000	92033000	164240000	353670000	284710000	1	1	1	33.3	33.3	33.3	3.2737	0.00034423	3.0247	589560000	5	4	1	1	1	1	1	1	1	1	1	33.3	33.3	33.3	2	2	1
70	A0A087WV66;P46013-2;P46013	A0A087WV66;P46013-2;P46013	Antigen KI-67	MKI67	tr|A0A087WV66|A0A087WV66_HUMAN Antigen KI-67 OS=Homo sapiens GN=MKI67 PE=1 SV=1;sp|P46013-2|KI67_HUMAN Isoform Short of Antigen KI-67 OS=Homo sapiens GN=MKI67;sp|P46013|KI67_HUMAN Antigen KI-67 OS=Homo sapiens GN=MKI67 PE=1 SV=2	8082200000	2157200000	5112200000	72413000	38124000	10176000	24114000	5386800000	5660600000	6180600000	56	56	56	26.4	26.4	26.4	358.62	0	323.31	15352000000	136	3	40	29	36	40	29	36	40	29	36	20	13.9	18.7	48	37	51
71	J3QS48;I3L295;J3KT75;J3QW43;J3QRD5;Q9H3L2;Q1HDL3;A0A087WV81;O75352-2;O75352;I3L1D2;J3KTK8;J3QQZ4;J3KSI4;I3L4E0;I3L405;I3L261	J3QS48;I3L295;J3KT75;J3QW43;J3QRD5;Q9H3L2;Q1HDL3;A0A087WV81;O75352-2;O75352;I3L1D2;J3KTK8;J3QQZ4;J3KSI4;I3L4E0	Mannose-P-dolichol utilization defect 1 protein	MPDU1;HBEBP2BPA	tr|J3QS48|J3QS48_HUMAN Mannose-P-dolichol utilization defect 1 protein OS=Homo sapiens GN=MPDU1 PE=1 SV=1;tr|I3L295|I3L295_HUMAN Mannose-P-dolichol utilization defect 1 protein OS=Homo sapiens GN=MPDU1 PE=1 SV=1;tr|J3KT75|J3KT75_HUMAN Mannose-P-dolichol ut	7002300000	3278400000	6095600000	3275300000	1400500000	655680000	1219100000	8969300000	7060700000	4889300000	6	6	6	57.4	57.4	57.4	10.978	0	22.157	16376000000	67	17	6	6	5	6	6	5	6	6	5	57.4	57.4	57.4	19	28	20
72	A0A087WVB0;Q9BQ39;A0A087WVC1	A0A087WVB0;Q9BQ39;A0A087WVC1	ATP-dependent RNA helicase DDX50	DDX50	tr|A0A087WVB0|A0A087WVB0_HUMAN ATP-dependent RNA helicase DDX50 OS=Homo sapiens GN=DDX50 PE=1 SV=1;sp|Q9BQ39|DDX50_HUMAN ATP-dependent RNA helicase DDX50 OS=Homo sapiens GN=DDX50 PE=1 SV=1;tr|A0A087WVC1|A0A087WVC1_HUMAN ATP-dependent RNA helicase DDX50 OS=	5448000000	1769000000	4563100000	280480000	129710000	42120000	108650000	4577700000	4247000000	4043200000	32	30	30	55.6	51.9	51.9	82.713	0	199.87	11780000000	127	3	25	26	28	23	24	26	23	24	26	45.8	47.7	49.3	38	42	47
73	A0A087WVF7;Q9NZM3-2;Q9NZM3;Q9NZM3-4;Q9NZM3-3;E7EPJ2;F8W719;H0Y3G5	A0A087WVF7;Q9NZM3-2;Q9NZM3;Q9NZM3-4;Q9NZM3-3	Intersectin-2	ITSN2	tr|A0A087WVF7|A0A087WVF7_HUMAN Intersectin-2 OS=Homo sapiens GN=ITSN2 PE=1 SV=1;sp|Q9NZM3-2|ITSN2_HUMAN Isoform 2 of Intersectin-2 OS=Homo sapiens GN=ITSN2;sp|Q9NZM3|ITSN2_HUMAN Intersectin-2 OS=Homo sapiens GN=ITSN2 PE=1 SV=3;sp|Q9NZM3-4|ITSN2_HUMAN Isofo	376470000	58050000	345310000	8208800	3962900	611050	3634900	308120000	149480000	299100000	15	15	14	12.9	12.9	12.2	191.6	0	28.891	779840000	29	8	9	2	12	9	2	12	8	2	11	7.9	2	10.5	11	5	13
74	A0A087WVI0;Q8WTW3;E9PBL8;J3KSY3;J3QKY9;J3QLT5	A0A087WVI0;Q8WTW3;E9PBL8	Conserved oligomeric Golgi complex subunit 1	COG1	tr|A0A087WVI0|A0A087WVI0_HUMAN Conserved oligomeric Golgi complex subunit 1 OS=Homo sapiens GN=COG1 PE=4 SV=1;sp|Q8WTW3|COG1_HUMAN Conserved oligomeric Golgi complex subunit 1 OS=Homo sapiens GN=COG1 PE=1 SV=1;tr|E9PBL8|E9PBL8_HUMAN Conserved oligomeric Go	227950000	28955000	202030000	7912700	3930200	499220	3483300	159070000	103170000	170260000	15	15	15	22.1	22.1	22.1	104.79	0	17.567	458940000	20	6	9	3	8	9	3	8	9	3	8	12.7	6.4	11.9	7	3	10
75	H0YBC7;A0A087WVL5;O60238-2;O60238	H0YBC7;A0A087WVL5;O60238-2;O60238	BCL2/adenovirus E1B 19 kDa protein-interacting protein 3-like	BNIP3L	tr|H0YBC7|H0YBC7_HUMAN BCL2/adenovirus E1B 19 kDa protein-interacting protein 3-like (Fragment) OS=Homo sapiens GN=BNIP3L PE=1 SV=1;tr|A0A087WVL5|A0A087WVL5_HUMAN BCL2/adenovirus E1B 19 kDa protein-interacting protein 3-like OS=Homo sapiens GN=BNIP3L PE=1	220190000	102050000	100430000	42267000	22019000	10205000	10043000	121290000	327500000	143930000	4	2	2	17.8	11.9	11.9	20.097	0	6.1179	422670000	5	4	3	1	3	2	1	1	2	1	1	17.3	8.1	14.1	3	2	0
76	A0A087WVM3;O00622	A0A087WVM3;O00622	Protein CYR61	CYR61	tr|A0A087WVM3|A0A087WVM3_HUMAN Protein CYR61 OS=Homo sapiens GN=CYR61 PE=4 SV=1;sp|O00622|CYR61_HUMAN Protein CYR61 OS=Homo sapiens GN=CYR61 PE=1 SV=1	378460000	46481000	285640000	24503000	13050000	1602800	9849700	303500000	127270000	218490000	6	6	6	19.5	19.5	19.5	41.839	0	12.681	710580000	17	2	5	2	5	5	2	5	5	2	5	16.9	6.9	16.9	6	2	9
77	A0A087WVM4;B7ZM99;Q6UB35;H0Y327;Q6UB35-2;Q4VXM0;Q5JYA8;Q5JYA3;Q4VXM1;Q4VXV2	A0A087WVM4;B7ZM99;Q6UB35	Monofunctional C1-tetrahydrofolate synthase, mitochondrial	MTHFD1L	tr|A0A087WVM4|A0A087WVM4_HUMAN Monofunctional C1-tetrahydrofolate synthase, mitochondrial OS=Homo sapiens GN=MTHFD1L PE=1 SV=1;tr|B7ZM99|B7ZM99_HUMAN MTHFD1L protein OS=Homo sapiens GN=MTHFD1L PE=1 SV=1;sp|Q6UB35|C1TM_HUMAN Monofunctional C1-tetrahydrofola	13403000000	5397000000	12825000000	632500000	268060000	107940000	256500000	12015000000	12285000000	12455000000	39	39	39	55.6	55.6	55.6	99.31	0	263.87	31625000000	210	10	36	29	31	36	29	31	36	29	31	51.6	43.3	49	67	67	76
78	E9PKV4;A0A087WVP0;Q2TAM5;E9PKH5;A0A087X0W8;Q04206-2;Q04206-3;Q04206;E9PI38;E9PQS6;Q04206-4	E9PKV4;A0A087WVP0;Q2TAM5;E9PKH5;A0A087X0W8;Q04206-2;Q04206-3;Q04206;E9PI38;E9PQS6;Q04206-4	Transcription factor p65	RELA	tr|E9PKV4|E9PKV4_HUMAN Transcription factor p65 OS=Homo sapiens GN=RELA PE=1 SV=1;tr|A0A087WVP0|A0A087WVP0_HUMAN Transcription factor p65 OS=Homo sapiens GN=RELA PE=1 SV=1;tr|Q2TAM5|Q2TAM5_HUMAN RELA protein OS=Homo sapiens GN=RELA PE=1 SV=1;tr|E9PKH5|E9PK	83665000	0	26929000	6505500	4921400	0	1584100	61678000	0	43183000	3	3	3	19.4	19.4	19.4	26.652	0	4.901	110590000	5	11	3	0	2	3	0	2	3	0	2	19.4	0	12.7	3	0	2
79	A0A087WVP1;Q14517;D6RCE4;H0Y9H4;H0Y9C8;H0Y8F5	A0A087WVP1;Q14517	Protocadherin Fat 1;Protocadherin Fat 1, nuclear form	FAT1	tr|A0A087WVP1|A0A087WVP1_HUMAN Protocadherin Fat 1 OS=Homo sapiens GN=FAT1 PE=1 SV=1;sp|Q14517|FAT1_HUMAN Protocadherin Fat 1 OS=Homo sapiens GN=FAT1 PE=1 SV=2	5855600000	315750000	1422100000	35650000	27491000	1482400	6676600	3642100000	985990000	2131400000	57	57	56	19.1	19.1	18.9	506.37	0	162.16	7593500000	96	6	41	13	31	41	13	31	40	12	30	13.4	3.7	10.5	46	14	36
80	A0A087WVQ6;Q00610-2;Q00610;J3KS13;K7EJJ5;J3KSQ2;J3KRF5;J3QL20;F5H5N6;A0A087WV74;A0A087WXH4	A0A087WVQ6;Q00610-2;Q00610	Clathrin heavy chain;Clathrin heavy chain 1	CLTC	tr|A0A087WVQ6|A0A087WVQ6_HUMAN Clathrin heavy chain 1 OS=Homo sapiens GN=CLTC PE=1 SV=1;sp|Q00610-2|CLH1_HUMAN Isoform 2 of Clathrin heavy chain 1 OS=Homo sapiens GN=CLTC;sp|Q00610|CLH1_HUMAN Clathrin heavy chain 1 OS=Homo sapiens GN=CLTC PE=1 SV=5	132660000000	52015000000	120870000000	3117800000	1353600000	530770000	1233400000	109900000000	107920000000	106230000000	110	110	87	70.5	70.5	59	192.06	0	323.31	305540000000	1399	11	98	88	101	98	88	101	78	68	81	67.4	63.6	68	432	466	501
81	A0A087WVT1;Q96MX3	A0A087WVT1;Q96MX3	Zinc finger protein 48	ZNF48	tr|A0A087WVT1|A0A087WVT1_HUMAN Zinc finger protein 48 OS=Homo sapiens GN=ZNF48 PE=1 SV=1;sp|Q96MX3|ZNF48_HUMAN Zinc finger protein 48 OS=Homo sapiens GN=ZNF48 PE=1 SV=2	110860000	0	26114000	3512100	2842500	0	669580	73602000	0	31903000	4	4	4	13.7	13.7	13.7	53.987	0	6.0408	136970000	5	2	4	0	1	4	0	1	4	0	1	13.7	0	2.2	4	0	1
82	D3DQ42;E9PNR3;A0A087WVX4;P49895-2;P49895-4;P49895	D3DQ42;E9PNR3;A0A087WVX4;P49895-2;P49895-4;P49895	Iodothyronine deiodinase;Type I iodothyronine deiodinase	DIO1	tr|D3DQ42|D3DQ42_HUMAN Iodothyronine deiodinase OS=Homo sapiens GN=DIO1 PE=3 SV=1;tr|E9PNR3|E9PNR3_HUMAN Iodothyronine deiodinase (Fragment) OS=Homo sapiens GN=DIO1 PE=3 SV=1;tr|A0A087WVX4|A0A087WVX4_HUMAN Type I iodothyronine deiodinase OS=Homo sapiens GN	29440000	0	0	4205600	4205600	0	0	16936000	0	0	1	1	1	20.8	20.8	20.8	13.981	0.00066434	2.4902	29440000	1	6	1	0	0	1	0	0	1	0	0	20.8	0	0	1	0	0
83	G3V4D0;G3V372;A0A087WVY6;Q9P055-4	G3V4D0;G3V372;A0A087WVY6;Q9P055-4		JKAMP	tr|G3V4D0|G3V4D0_HUMAN JNK1/MAPK8-associated membrane protein OS=Homo sapiens GN=JKAMP PE=4 SV=1;tr|G3V372|G3V372_HUMAN JNK1/MAPK8-associated membrane protein OS=Homo sapiens GN=JKAMP PE=4 SV=1;tr|A0A087WVY6|A0A087WVY6_HUMAN JNK1/MAPK8-associated membrane	29848000	0	0	9949200	9949200	0	0	17170000	0	0	1	1	1	10.7	10.7	10.7	15.851	0.0011496	2.3188	29848000	1	4	1	0	0	1	0	0	1	0	0	10.7	0	0	1	0	0
84	A0A087WW18;D3DPQ2;H7C3R6;A0A087X0V4;A8K0B5;Q8IWT0-2;Q8IWT0	A0A087WW18;D3DPQ2;H7C3R6;A0A087X0V4;A8K0B5;Q8IWT0-2;Q8IWT0	Protein archease	ZBTB8OS	tr|A0A087WW18|A0A087WW18_HUMAN Protein archease (Fragment) OS=Homo sapiens GN=ZBTB8OS PE=1 SV=1;tr|D3DPQ2|D3DPQ2_HUMAN Protein archease OS=Homo sapiens GN=ZBTB8OS PE=1 SV=1;tr|H7C3R6|H7C3R6_HUMAN Protein archease (Fragment) OS=Homo sapiens GN=ZBTB8OS PE=1	0	0	0	0	0	0	0	0	0	0	1	1	1	13.9	13.9	13.9	8.1802	0.00034429	3.0258	0	1	7	1	0	0	1	0	0	1	0	0	13.9	0	0	1	0	0
85	A0A087WW23	A0A087WW23		ALOX5AP	tr|A0A087WW23|A0A087WW23_HUMAN Arachidonate 5-lipoxygenase-activating protein OS=Homo sapiens GN=ALOX5AP PE=1 SV=1	0	0	0	0	0	0	0	0	0	0	1	1	1	6.4	6.4	6.4	24.208	1	-2	0	1	1	1	0	0	1	0	0	1	0	0	6.4	0	0	1	0	0
86	A0A087WW39;P55198	A0A087WW39;P55198	Protein AF-17	MLLT6	tr|A0A087WW39|A0A087WW39_HUMAN Protein AF-17 OS=Homo sapiens GN=MLLT6 PE=1 SV=1;sp|P55198|AF17_HUMAN Protein AF-17 OS=Homo sapiens GN=MLLT6 PE=1 SV=2	0	6503300	10142000	554830	0	216780	338060	0	7456600	17620000	1	1	1	2.1	2.1	2.1	112.05	0	12.297	16645000	3	2	0	1	1	0	1	1	0	1	1	0	2.1	2.1	0	2	1
87	A0A087WW40;Q9Y371;Q9Y371-2;Q9Y371-3	A0A087WW40;Q9Y371;Q9Y371-2;Q9Y371-3	Endophilin-B1	SH3GLB1	tr|A0A087WW40|A0A087WW40_HUMAN Endophilin-B1 OS=Homo sapiens GN=SH3GLB1 PE=1 SV=1;sp|Q9Y371|SHLB1_HUMAN Endophilin-B1 OS=Homo sapiens GN=SH3GLB1 PE=1 SV=1;sp|Q9Y371-2|SHLB1_HUMAN Isoform 2 of Endophilin-B1 OS=Homo sapiens GN=SH3GLB1;sp|Q9Y371-3|SHLB1_HUMAN	180290000	79646000	160660000	19118000	8194800	3620300	7302800	121800000	249180000	121740000	6	6	6	23.9	23.9	23.9	44.26	0	27.767	420590000	9	4	4	2	3	4	2	3	4	2	3	16.2	7.1	14.7	5	2	2
88	A0A087WW58;Q9C0D9;C9JAG1	A0A087WW58;Q9C0D9;C9JAG1	Ethanolaminephosphotransferase 1	EPT1	tr|A0A087WW58|A0A087WW58_HUMAN Ethanolaminephosphotransferase 1 OS=Homo sapiens GN=EPT1 PE=1 SV=1;sp|Q9C0D9|EPT1_HUMAN Ethanolaminephosphotransferase 1 OS=Homo sapiens GN=EPT1 PE=1 SV=3;tr|C9JAG1|C9JAG1_HUMAN Ethanolaminephosphotransferase 1 (Fragment) OS=	1587700000	666910000	1432100000	460840000	198470000	83364000	179010000	1215900000	1600600000	1200000000	4	4	4	13.9	13.9	13.9	45.078	0	46.304	3686700000	25	3	4	3	3	4	3	3	4	3	3	13.9	8.1	10.4	10	6	9
89	A0A087WW76;Q5T5U3;E7ESW5;F8W9U9;Q5T5U3-3;Q5JSD8;H0Y468	A0A087WW76;Q5T5U3;E7ESW5;F8W9U9;Q5T5U3-3	Rho GTPase-activating protein 21	ARHGAP21	tr|A0A087WW76|A0A087WW76_HUMAN Rho GTPase-activating protein 21 OS=Homo sapiens GN=ARHGAP21 PE=1 SV=1;sp|Q5T5U3|RHG21_HUMAN Rho GTPase-activating protein 21 OS=Homo sapiens GN=ARHGAP21 PE=1 SV=1;tr|E7ESW5|E7ESW5_HUMAN Rho GTPase-activating protein 21 (Frag	108010000	30086000	84833000	2449800	1187000	330620	932230	116760000	82332000	41645000	6	6	6	5.5	5.5	5.5	155.98	0	9.3881	222930000	6	7	5	1	2	5	1	2	5	1	2	4.8	0.7	1.4	4	1	1
90	A0A087WW77;Q15334	A0A087WW77;Q15334	Lethal(2) giant larvae protein homolog 1	LLGL1	tr|A0A087WW77|A0A087WW77_HUMAN Lethal(2) giant larvae protein homolog 1 OS=Homo sapiens GN=LLGL1 PE=1 SV=1;sp|Q15334|L2GL1_HUMAN Lethal(2) giant larvae protein homolog 1 OS=Homo sapiens GN=LLGL1 PE=1 SV=3	101690000	6638900	59846000	3822100	2311100	150890	1360100	85997000	0	50512000	9	9	9	14.2	14.2	14.2	114.43	0	10.021	168170000	11	2	6	1	5	6	1	5	6	1	5	8.6	2.3	8.4	5	2	4
91	A0A087WW95;O15119-2;O15119;O15119-3;Q13207;F8WCM9	A0A087WW95;O15119-2;O15119;O15119-3	T-box transcription factor TBX3	TBX3	tr|A0A087WW95|A0A087WW95_HUMAN T-box transcription factor TBX3 OS=Homo sapiens GN=TBX3 PE=1 SV=1;sp|O15119-2|TBX3_HUMAN Isoform I of T-box transcription factor TBX3 OS=Homo sapiens GN=TBX3;sp|O15119|TBX3_HUMAN T-box transcription factor TBX3 OS=Homo sapien	137130000	0	138140000	7646500	3809200	0	3837300	101880000	0	151540000	6	6	6	10.8	10.8	10.8	77.147	0	9.3884	275270000	11	6	4	0	4	4	0	4	4	0	4	8.3	0	7.1	7	0	4
92	F8W8R3;A0A087WWF6;P49005;C9JLE1;C9IZD2;C9J8Z7;C9JHC7;H7C1B3	F8W8R3;A0A087WWF6;P49005;C9JLE1;C9IZD2;C9J8Z7;C9JHC7	DNA polymerase delta subunit 2	POLD2	tr|F8W8R3|F8W8R3_HUMAN DNA polymerase delta subunit 2 OS=Homo sapiens GN=POLD2 PE=1 SV=1;tr|A0A087WWF6|A0A087WWF6_HUMAN DNA polymerase delta subunit 2 OS=Homo sapiens GN=POLD2 PE=1 SV=1;sp|P49005|DPOD2_HUMAN DNA polymerase delta subunit 2 OS=Homo sapiens G	138780000	0	77949000	9851100	6308000	0	3543100	93266000	0	99008000	7	7	7	22.6	22.6	22.6	49.612	0	13.771	216730000	9	8	5	0	4	5	0	4	5	0	4	15.6	0	13.2	5	0	4
93	A0A087WWK8;Q6DN90;Q6DN90-2;Q5JU85-3;Q5JU85;Q5JU85-2;Q9UPP2-2;Q9UPP2	A0A087WWK8;Q6DN90;Q6DN90-2	IQ motif and SEC7 domain-containing protein 1	IQSEC1	tr|A0A087WWK8|A0A087WWK8_HUMAN IQ motif and SEC7 domain-containing protein 1 OS=Homo sapiens GN=IQSEC1 PE=1 SV=1;sp|Q6DN90|IQEC1_HUMAN IQ motif and SEC7 domain-containing protein 1 OS=Homo sapiens GN=IQSEC1 PE=1 SV=1;sp|Q6DN90-2|IQEC1_HUMAN Isoform 2 of IQ	508230000	23203000	233020000	12532000	8331600	380380	3819900	358300000	26759000	286750000	12	12	12	13.6	13.6	13.6	124.48	0	32.078	764450000	22	8	9	2	9	9	2	9	9	2	9	10.6	3.1	10	11	3	8
94	A0A087WWM4;F8WAN9;H0YNJ6;Q9P2T1;Q9P2T1-2;H0YMB3;H0YLV5;Q9P2T1-3;H0YLB8;H0YNS9;H0YNH0;H0YMR9;H0YMV5;H0YL68;H0YKE1;H0YN22;H0YMG3;H0YKK3;H0YK13;H0YN74;H0YMW6;H0YK71	A0A087WWM4;F8WAN9;H0YNJ6;Q9P2T1;Q9P2T1-2;H0YMB3;H0YLV5;Q9P2T1-3;H0YLB8;H0YNS9;H0YNH0	GMP reductase;GMP reductase 2	GMPR2	tr|A0A087WWM4|A0A087WWM4_HUMAN GMP reductase 2 OS=Homo sapiens GN=GMPR2 PE=1 SV=1;tr|F8WAN9|F8WAN9_HUMAN GMP reductase 2 OS=Homo sapiens GN=GMPR2 PE=1 SV=1;tr|H0YNJ6|H0YNJ6_HUMAN GMP reductase OS=Homo sapiens GN=GMPR2 PE=1 SV=1;sp|Q9P2T1|GMPR2_HUMAN GMP re	771630000	274850000	492070000	90503000	45390000	16168000	28945000	415620000	744010000	376200000	8	8	8	44.5	44.5	44.5	38.217	0	52.583	1538500000	27	22	7	4	6	7	4	6	7	4	6	37.9	17.2	32.2	9	8	10
95	A0A087WWP4;Q96T37-4;Q96T37-2;Q96T37-3;Q96T37	A0A087WWP4;Q96T37-4;Q96T37-2;Q96T37-3;Q96T37	Putative RNA-binding protein 15	RBM15	tr|A0A087WWP4|A0A087WWP4_HUMAN Putative RNA-binding protein 15 OS=Homo sapiens GN=RBM15 PE=1 SV=1;sp|Q96T37-4|RBM15_HUMAN Isoform 4 of Putative RNA-binding protein 15 OS=Homo sapiens GN=RBM15;sp|Q96T37-2|RBM15_HUMAN Isoform 2 of Putative RNA-binding protei	2855700000	1045800000	2510200000	105110000	46814000	17144000	41151000	2277800000	2865600000	2341500000	24	24	23	31.3	31.3	30.3	102.13	0	156.07	6411700000	83	5	18	17	17	18	17	17	18	16	16	26.3	24	24.2	31	22	30
96	A0A087WWP7;A0A087X1P0;P23470-2;P23470	A0A087WWP7;A0A087X1P0;P23470-2;P23470	Protein-tyrosine-phosphatase;Receptor-type tyrosine-protein phosphatase gamma	PTPRG	tr|A0A087WWP7|A0A087WWP7_HUMAN Receptor-type tyrosine-protein phosphatase gamma OS=Homo sapiens GN=PTPRG PE=1 SV=1;tr|A0A087X1P0|A0A087X1P0_HUMAN Receptor-type tyrosine-protein phosphatase gamma OS=Homo sapiens GN=PTPRG PE=1 SV=1;sp|P23470-2|PTPRG_HUMAN Is	802480000	121310000	639860000	22995000	11801000	1783900	9409700	558630000	436730000	519730000	19	19	19	20.2	20.2	20.2	151.54	0	69.335	1563600000	40	4	17	7	14	17	7	14	17	7	14	18.7	7.3	13.7	21	6	13
97	A0A087WWP8;Q5VWQ0;Q5VWQ0-4	A0A087WWP8;Q5VWQ0;Q5VWQ0-4	Round spermatid basic protein 1	RSBN1	tr|A0A087WWP8|A0A087WWP8_HUMAN Round spermatid basic protein 1 OS=Homo sapiens GN=RSBN1 PE=1 SV=1;sp|Q5VWQ0|RSBN1_HUMAN Round spermatid basic protein 1 OS=Homo sapiens GN=RSBN1 PE=1 SV=2;sp|Q5VWQ0-4|RSBN1_HUMAN Isoform 4 of Round spermatid basic protein 1	45244000	11413000	15577000	1952300	1222800	308470	420990	26129000	31481000	16496000	2	2	2	3.7	3.7	3.7	84.975	0	6.5025	72234000	4	3	2	1	1	2	1	1	2	1	1	3.7	2.1	2.1	2	1	1
98	A0A087WWS1;Q96FV9;Q96FV9-2;A0A087WY84;R4GMN4;J3KT14;R4GN58;J3KRD7;J3QQZ3	A0A087WWS1;Q96FV9;Q96FV9-2;A0A087WY84	THO complex subunit 1	THOC1	tr|A0A087WWS1|A0A087WWS1_HUMAN THO complex subunit 1 OS=Homo sapiens GN=THOC1 PE=1 SV=1;sp|Q96FV9|THOC1_HUMAN THO complex subunit 1 OS=Homo sapiens GN=THOC1 PE=1 SV=1;sp|Q96FV9-2|THOC1_HUMAN Isoform 2 of THO complex subunit 1 OS=Homo sapiens GN=THOC1;tr|A0	4859700000	1804500000	4759200000	285590000	121490000	45112000	118980000	4401400000	4870400000	4075600000	33	33	33	63.9	63.9	63.9	75.651	0	116.54	11423000000	105	9	25	18	26	25	18	26	25	18	26	50.7	32.6	47	39	31	35
99	A0A087WWW8;Q9Y6J0-2;Q9Y6J0;B5MEB3	A0A087WWW8;Q9Y6J0-2;Q9Y6J0	Calcineurin-binding protein cabin-1	CABIN1	tr|A0A087WWW8|A0A087WWW8_HUMAN Calcineurin-binding protein cabin-1 OS=Homo sapiens GN=CABIN1 PE=1 SV=1;sp|Q9Y6J0-2|CABIN_HUMAN Isoform 2 of Calcineurin-binding protein cabin-1 OS=Homo sapiens GN=CABIN1;sp|Q9Y6J0|CABIN_HUMAN Calcineurin-binding protein cabi	337890000	0	276110000	5116600	2815700	0	2300900	268330000	0	252240000	10	10	9	6.3	6.3	6	240.76	0	20.77	613990000	18	4	9	0	7	9	0	7	8	0	6	5.8	0	3.7	10	0	8
100	A0A087WWZ2;Q9H4Z3	A0A087WWZ2;Q9H4Z3	Phosphorylated CTD-interacting factor 1	PCIF1	tr|A0A087WWZ2|A0A087WWZ2_HUMAN Phosphorylated CTD-interacting factor 1 (Fragment) OS=Homo sapiens GN=PCIF1 PE=4 SV=1;sp|Q9H4Z3|PCIF1_HUMAN Phosphorylated CTD-interacting factor 1 OS=Homo sapiens GN=PCIF1 PE=1 SV=1	4631300	0	12970000	1035400	272430	0	762950	3289500	0	0	2	2	2	10.5	10.5	10.5	34.458	0.00033875	2.7909	17601000	1	2	1	0	1	1	0	1	1	0	1	6.2	0	4.3	1	0	0
101	A0A087WX23;A0A087WUL4;A0A087WXK2;Q86TG7;A0A087WZG9;Q86TG7-2;A0A087WYS2	A0A087WX23;A0A087WUL4;A0A087WXK2;Q86TG7;A0A087WZG9;Q86TG7-2	Retrotransposon-derived protein PEG10	PEG10	tr|A0A087WX23|A0A087WX23_HUMAN Retrotransposon-derived protein PEG10 OS=Homo sapiens GN=PEG10 PE=1 SV=1;tr|A0A087WUL4|A0A087WUL4_HUMAN Retrotransposon-derived protein PEG10 OS=Homo sapiens GN=PEG10 PE=1 SV=1;tr|A0A087WXK2|A0A087WXK2_HUMAN Retrotransposon-d	8499300000	2686600000	8172100000	569350000	249980000	79017000	240360000	7973500000	6155500000	7904400000	29	29	29	50.6	50.6	50.6	88.209	0	323.31	19358000000	159	7	26	23	26	26	23	26	26	23	26	48.5	36.3	45.5	57	41	61
102	A0A087WX36;D3DSM0;P05107;J3KNI6	A0A087WX36;D3DSM0;P05107;J3KNI6	Integrin beta;Integrin beta-2	ITGB2	tr|A0A087WX36|A0A087WX36_HUMAN Integrin beta-2 OS=Homo sapiens GN=ITGB2 PE=4 SV=1;tr|D3DSM0|D3DSM0_HUMAN Integrin beta OS=Homo sapiens GN=ITGB2 PE=3 SV=1;sp|P05107|ITB2_HUMAN Integrin beta-2 OS=Homo sapiens GN=ITGB2 PE=1 SV=2;tr|J3KNI6|J3KNI6_HUMAN Integri	17027000	106540000	88440000	8833500	709470	4439100	3685000	139370000	143620000	177570000	3	3	3	8.7	8.7	8.7	41.744	0.0001763	3.459	212010000	6	4	1	2	2	1	2	2	1	2	2	4	6.9	5.8	1	3	2
103	A0A087WX92;O15403	A0A087WX92;O15403	Monocarboxylate transporter 7	SLC16A6	tr|A0A087WX92|A0A087WX92_HUMAN Monocarboxylate transporter 7 OS=Homo sapiens GN=SLC16A6 PE=1 SV=1;sp|O15403|MOT7_HUMAN Monocarboxylate transporter 7 OS=Homo sapiens GN=SLC16A6 PE=1 SV=2	2092800000	978470000	1783000000	269680000	116270000	54359000	99056000	1768500000	2069300000	2256800000	11	11	11	20.9	20.9	20.9	57.494	0	23.875	4854300000	44	2	10	7	8	10	7	8	10	7	8	20.7	15.7	15.9	16	16	12
104	A0A087WXB8;Q9Y274;C9IZL6;C9J480;C9J0E2;Q9Y274-2;C9JXM2;C9JWJ3;C9JWI9;C9JMW7;C9J9Y4	A0A087WXB8;Q9Y274;C9IZL6;C9J480;C9J0E2;Q9Y274-2	Type 2 lactosamine alpha-2,3-sialyltransferase	ST3GAL6	tr|A0A087WXB8|A0A087WXB8_HUMAN ST3 beta-galactoside alpha-2,3-sialyltransferase 6, isoform CRA_b OS=Homo sapiens GN=ST3GAL6 PE=4 SV=1;sp|Q9Y274|SIA10_HUMAN Type 2 lactosamine alpha-2,3-sialyltransferase OS=Homo sapiens GN=ST3GAL6 PE=1 SV=1;tr|C9IZL6|C9IZL6	93961000	26196000	284920000	16878000	3915000	1091500	11871000	146670000	127260000	163440000	7	7	7	18.2	18.2	18.2	43.47	0	9.2076	405070000	14	11	4	2	6	4	2	6	4	2	6	10.9	4.2	15.9	4	2	8
105	A0A087WXC5;E7ESZ7;O95299;O95299-2;H7C2W5;H7C1Y7;H7C2X4;C9J6X0;Q8N1B9	A0A087WXC5;E7ESZ7;O95299;O95299-2	NADH dehydrogenase [ubiquinone] 1 alpha subcomplex subunit 10, mitochondrial	NDUFA10	tr|A0A087WXC5|A0A087WXC5_HUMAN NADH dehydrogenase [ubiquinone] 1 alpha subcomplex subunit 10, mitochondrial OS=Homo sapiens GN=NDUFA10 PE=1 SV=1;tr|E7ESZ7|E7ESZ7_HUMAN NADH dehydrogenase [ubiquinone] 1 alpha subcomplex subunit 10, mitochondrial OS=Homo sap	13183000000	6409200000	9989900000	1183300000	527330000	256370000	399600000	12660000000	12700000000	11327000000	20	20	20	54.6	54.6	54.6	40.836	0	220.45	29582000000	115	9	18	16	17	18	16	17	18	16	17	54.4	46.8	52.4	37	43	35
106	A0A087X1U4;A0A087WXF0;P51608;P51608-2;A0A087WVW7;B5MCB4	A0A087X1U4;A0A087WXF0;P51608;P51608-2;A0A087WVW7	Methyl-CpG-binding protein 2	MECP2	tr|A0A087X1U4|A0A087X1U4_HUMAN Methyl-CpG-binding protein 2 OS=Homo sapiens GN=MECP2 PE=1 SV=1;tr|A0A087WXF0|A0A087WXF0_HUMAN Methyl-CpG-binding protein 2 OS=Homo sapiens GN=MECP2 PE=1 SV=1;sp|P51608|MECP2_HUMAN Methyl-CpG-binding protein 2 OS=Homo sapiens	496920000	97510000	337420000	54814000	29230000	5735900	19848000	287860000	366430000	340000000	7	7	7	33.6	33.6	33.6	34.897	0	29.017	931840000	15	6	6	3	6	6	3	6	6	3	6	30.6	15.4	27.2	7	3	5
107	A0A087WXU5;E7EPF0;A0A087WXF8;Q9NP64-2;Q9NP64-3;Q9NP64;A0A087WYV3;A0A087WYF0	A0A087WXU5;E7EPF0;A0A087WXF8;Q9NP64-2;Q9NP64-3;Q9NP64;A0A087WYV3	Nucleolar protein of 40 kDa	ZCCHC17	tr|A0A087WXU5|A0A087WXU5_HUMAN Nucleolar protein of 40 kDa OS=Homo sapiens GN=ZCCHC17 PE=1 SV=1;tr|E7EPF0|E7EPF0_HUMAN Nucleolar protein of 40 kDa OS=Homo sapiens GN=ZCCHC17 PE=1 SV=2;tr|A0A087WXF8|A0A087WXF8_HUMAN Nucleolar protein of 40 kDa OS=Homo sapie	64330000	35801000	28243000	14264000	7147800	3977900	3138100	54756000	79195000	60214000	3	3	3	26.7	26.7	26.7	16.523	0	5.5466	128370000	4	8	2	2	1	2	2	1	2	2	1	17.8	18.5	8.2	1	2	1
108	A0A087WXK9;Q15643;H0YJ97;H0YJI2	A0A087WXK9;Q15643;H0YJ97	Thyroid receptor-interacting protein 11	TRIP11	tr|A0A087WXK9|A0A087WXK9_HUMAN Thyroid receptor-interacting protein 11 OS=Homo sapiens GN=TRIP11 PE=1 SV=1;sp|Q15643|TRIPB_HUMAN Thyroid receptor-interacting protein 11 OS=Homo sapiens GN=TRIP11 PE=1 SV=3;tr|H0YJ97|H0YJ97_HUMAN Thyroid receptor-interacting	1047600000	252300000	665410000	13938000	7429900	1789300	4719200	797910000	654180000	637770000	33	33	33	24.9	24.9	24.9	227.42	0	96.093	1965300000	54	4	21	13	17	21	13	17	21	13	17	16.1	9.6	14.7	25	11	18
109	A0A087WXM6;J3QQT2;J3KRX5;P18621;P18621-3;J3QLC8;P18621-2;J3KRB3;A0A087WWH0;J3QS96;A0A087WY81;J3KSJ0	A0A087WXM6;J3QQT2;J3KRX5;P18621;P18621-3;J3QLC8;P18621-2;J3KRB3;A0A087WWH0;J3QS96;A0A087WY81	60S ribosomal protein L17	RPL17	tr|A0A087WXM6|A0A087WXM6_HUMAN 60S ribosomal protein L17 (Fragment) OS=Homo sapiens GN=RPL17 PE=1 SV=1;tr|J3QQT2|J3QQT2_HUMAN 60S ribosomal protein L17 (Fragment) OS=Homo sapiens GN=RPL17 PE=1 SV=1;tr|J3KRX5|J3KRX5_HUMAN 60S ribosomal protein L17 (Fragment	17516000000	8099800000	15295000000	3409200000	1459700000	674980000	1274600000	16752000000	15981000000	14141000000	12	12	12	60.4	60.4	60.4	19.586	0	73.517	40911000000	173	12	11	10	11	11	10	11	11	10	11	55	55	55	49	65	59
110	I3L2G4;A0A087WXN9;Q765P7-2;Q765P7	I3L2G4;A0A087WXN9;Q765P7-2;Q765P7	MTSS1-like protein	MTSS1L	tr|I3L2G4|I3L2G4_HUMAN MTSS1-like protein (Fragment) OS=Homo sapiens GN=MTSS1L PE=4 SV=1;tr|A0A087WXN9|A0A087WXN9_HUMAN MTSS1-like protein OS=Homo sapiens GN=MTSS1L PE=1 SV=1;sp|Q765P7-2|MTSSL_HUMAN Isoform 2 of MTSS1-like protein OS=Homo sapiens GN=MTSS1L	45158000	0	0	7526300	7526300	0	0	38372000	0	0	1	1	1	9.8	9.8	9.8	19.89	0.00017902	3.7991	45158000	1	4	1	0	0	1	0	0	1	0	0	9.8	0	0	1	0	0
111	F5H8G1;F5H1Z6;F5H8H3;A0A087WXR2;Q9Y365;F5GWK5;F5H0V7;F5GY11;F5GY07;F5H5A8;F5H3G8;H0YGA9;H0YFF3;H0YGN8;H0YH17	F5H8G1;F5H1Z6;F5H8H3;A0A087WXR2;Q9Y365;F5GWK5;F5H0V7;F5GY11;F5GY07;F5H5A8;F5H3G8;H0YGA9;H0YFF3	PCTP-like protein	STARD10	tr|F5H8G1|F5H8G1_HUMAN PCTP-like protein (Fragment) OS=Homo sapiens GN=STARD10 PE=1 SV=1;tr|F5H1Z6|F5H1Z6_HUMAN PCTP-like protein (Fragment) OS=Homo sapiens GN=STARD10 PE=1 SV=1;tr|F5H8H3|F5H8H3_HUMAN PCTP-like protein OS=Homo sapiens GN=STARD10 PE=1 SV=1;	119730000	0	35922000	14150000	10885000	0	3265700	56287000	0	65461000	4	4	4	34	34	34	21.934	0	25.091	155650000	5	15	3	0	2	3	0	2	3	0	2	25.7	0	19.4	3	0	2
112	A0A087WXS0;P48788-2;P48788	A0A087WXS0;P48788-2;P48788	Troponin I, fast skeletal muscle	TNNI2	tr|A0A087WXS0|A0A087WXS0_HUMAN Troponin I, fast skeletal muscle OS=Homo sapiens GN=TNNI2 PE=4 SV=1;sp|P48788-2|TNNI2_HUMAN Isoform 2 of Troponin I, fast skeletal muscle OS=Homo sapiens GN=TNNI2;sp|P48788|TNNI2_HUMAN Troponin I, fast skeletal muscle OS=Homo	43825000	0	0	3652100	3652100	0	0	25211000	0	0	1	1	1	13.7	13.7	13.7	21.321	0.00017724	3.5637	43825000	2	3	1	0	0	1	0	0	1	0	0	13.7	0	0	2	0	0
113	A0A087WXU0;Q9NWS8;Q9NWS8-2;Q5SZ82	A0A087WXU0;Q9NWS8;Q9NWS8-2;Q5SZ82	Required for meiotic nuclear division protein 1 homolog	RMND1	tr|A0A087WXU0|A0A087WXU0_HUMAN Required for meiotic nuclear division protein 1 homolog OS=Homo sapiens GN=RMND1 PE=1 SV=1;sp|Q9NWS8|RMND1_HUMAN Required for meiotic nuclear division protein 1 homolog OS=Homo sapiens GN=RMND1 PE=1 SV=2;sp|Q9NWS8-2|RMND1_HUM	2772900000	714950000	2582100000	357060000	163110000	42056000	151890000	2643000000	1765000000	2031900000	13	13	13	49.1	49.1	49.1	32.26	0	79.286	6069900000	61	4	12	9	12	12	9	12	12	9	12	49.1	38.7	49.1	20	17	24
114	A0A087WXV4;P41235-5;P41235;P41235-4;P41235-7;P41235-3;P41235-6;P41235-2;Q14541;Q14541-2	A0A087WXV4;P41235-5;P41235;P41235-4;P41235-7;P41235-3;P41235-6;P41235-2	Hepatocyte nuclear factor 4-alpha	HNF4A	tr|A0A087WXV4|A0A087WXV4_HUMAN Hepatocyte nuclear factor 4-alpha OS=Homo sapiens GN=HNF4A PE=4 SV=1;sp|P41235-5|HNF4A_HUMAN Isoform HNF4-Alpha-7 of Hepatocyte nuclear factor 4-alpha OS=Homo sapiens GN=HNF4A;sp|P41235|HNF4A_HUMAN Hepatocyte nuclear factor 4	2499500000	568750000	1748400000	229360000	119020000	27084000	83255000	1616900000	1358600000	1423900000	10	10	10	34.5	34.5	34.5	49.99	0	66.202	4816600000	41	10	10	7	8	10	7	8	10	7	8	34.5	21.8	26.7	18	10	13
115	A0A087WXW3;Q9Y3P8	A0A087WXW3;Q9Y3P8	Signaling threshold-regulating transmembrane adapter 1	SIT1	tr|A0A087WXW3|A0A087WXW3_HUMAN Signaling threshold-regulating transmembrane adapter 1 OS=Homo sapiens GN=SIT1 PE=1 SV=1;sp|Q9Y3P8|SIT1_HUMAN Signaling threshold-regulating transmembrane adapter 1 OS=Homo sapiens GN=SIT1 PE=1 SV=1	9799300	3620600	0	1118300	816610	301710	0	8113200	0	0	2	2	2	17	17	17	24.201	0.00034789	3.2002	13420000	2	2	1	1	0	1	1	0	1	1	0	8.5	8.5	0	1	1	0
116	A0A087WXX9;P54646	A0A087WXX9;P54646	5-AMP-activated protein kinase catalytic subunit alpha-2	PRKAA2	tr|A0A087WXX9|A0A087WXX9_HUMAN 5-AMP-activated protein kinase catalytic subunit alpha-2 OS=Homo sapiens GN=PRKAA2 PE=1 SV=1;sp|P54646|AAPK2_HUMAN 5-AMP-activated protein kinase catalytic subunit alpha-2 OS=Homo sapiens GN=PRKAA2 PE=1 SV=2	0	0	12331000	425200	0	0	425200	0	0	13135000	5	2	2	13.6	4.5	4.5	62.319	0.00034971	3.2905	12331000	2	2	3	1	4	0	0	2	0	0	2	9.1	3.1	10.5	0	0	2
117	A0A087WXZ3;Q9Y5A9;Q9Y5A9-2;S4R3V3;S4R3J8	A0A087WXZ3;Q9Y5A9;Q9Y5A9-2	YTH domain-containing family protein 2	YTHDF2	tr|A0A087WXZ3|A0A087WXZ3_HUMAN YTH domain-containing family protein 2 OS=Homo sapiens GN=YTHDF2 PE=1 SV=1;sp|Q9Y5A9|YTHD2_HUMAN YTH domain-containing family protein 2 OS=Homo sapiens GN=YTHDF2 PE=1 SV=2;sp|Q9Y5A9-2|YTHD2_HUMAN Isoform 2 of YTH domain-conta	2352700000	58739000	130840000	115560000	106940000	2669900	5947300	1289600000	0	1161900000	6	6	3	10.7	10.7	6.3	61.163	0	6.486	2542300000	7	5	4	2	2	4	2	2	3	0	2	7.6	3.2	4.2	3	1	3
118	A0A087WY43;P06493;A0A087WZZ9;E5RIU6;P06493-2;K7ELV5;Q00526;G3V317;F8VXD2;F8VYH9;F8VZZ0;F8VTV8;F8VWX7;F8VZ51;K7EJ83;E7EUK8;P11802-2;P11802;Q96Q40-2;Q96Q40-4;Q96Q40-3;O94921-3;Q96Q40-5;Q96Q40;O94921-2;O94921;Q07002;Q07002-2;Q07002-3	A0A087WY43;P06493;A0A087WZZ9;E5RIU6;P06493-2	Cyclin-dependent kinase 1	CDK1	tr|A0A087WY43|A0A087WY43_HUMAN Cyclin-dependent kinase 1 OS=Homo sapiens GN=CDK1 PE=1 SV=1;sp|P06493|CDK1_HUMAN Cyclin-dependent kinase 1 OS=Homo sapiens GN=CDK1 PE=1 SV=3;tr|A0A087WZZ9|A0A087WZZ9_HUMAN Cyclin-dependent kinase 1 OS=Homo sapiens GN=CDK1 PE=	1264100000	164880000	666460000	99783000	60195000	7851700	31736000	828620000	539810000	704580000	14	13	12	60.5	57.8	54.2	34.55	0	24.532	2095400000	34	29	13	6	8	12	5	7	11	5	7	56.5	25.9	33.9	17	6	11
119	A0A087WY55;Q9NP79;Q5TGM0;Q9NP79-2	A0A087WY55;Q9NP79;Q5TGM0;Q9NP79-2	Vacuolar protein sorting-associated protein VTA1 homolog	VTA1	tr|A0A087WY55|A0A087WY55_HUMAN Chromosome 6 open reading frame 55, isoform CRA_b OS=Homo sapiens GN=VTA1 PE=1 SV=1;sp|Q9NP79|VTA1_HUMAN Vacuolar protein sorting-associated protein VTA1 homolog OS=Homo sapiens GN=VTA1 PE=1 SV=1;tr|Q5TGM0|Q5TGM0_HUMAN Vacuol	745840000	64846000	594130000	108060000	57372000	4988100	45702000	431750000	291910000	536300000	8	8	8	33.6	33.6	33.6	31.102	0	41.138	1404800000	21	4	6	2	7	6	2	7	6	2	7	25	10	30.7	8	3	10
120	H0Y3Q0;A0A087WZR0;A0A087WY68;P29122-2;P29122-8;P29122;P29122-7;H0YMW5;H0YLC8;A0A087X025;H7BXT3;P29122-6;P29122-5;P29122-4	H0Y3Q0;A0A087WZR0;A0A087WY68;P29122-2;P29122-8;P29122;P29122-7	Proprotein convertase subtilisin/kexin type 6	PCSK6	tr|H0Y3Q0|H0Y3Q0_HUMAN Proprotein convertase subtilisin/kexin type 6 (Fragment) OS=Homo sapiens GN=PCSK6 PE=3 SV=1;tr|A0A087WZR0|A0A087WZR0_HUMAN Proprotein convertase subtilisin/kexin type 6 OS=Homo sapiens GN=PCSK6 PE=4 SV=1;tr|A0A087WY68|A0A087WY68_HUMA	30427000	4413600	16135000	1084600	647370	93907	343290	14560000	0	26597000	3	3	3	5.3	5.3	5.3	88.555	0	5.2188	50975000	4	14	2	1	1	2	1	1	2	1	1	3.1	2.1	1.1	2	1	1
121	D6RFM0;D6RAH7;H9KV45;A0A087WY85;P62837-2;P62837;P61077;P61077-2;P61077-3	D6RFM0;D6RAH7;H9KV45;A0A087WY85;P62837-2;P62837;P61077;P61077-2;P61077-3	Ubiquitin-conjugating enzyme E2 D2;Ubiquitin-conjugating enzyme E2 D3	UBE2D2;UBE2D3	tr|D6RFM0|D6RFM0_HUMAN Ubiquitin-conjugating enzyme E2 D2 (Fragment) OS=Homo sapiens GN=UBE2D2 PE=3 SV=1;tr|D6RAH7|D6RAH7_HUMAN Ubiquitin-conjugating enzyme E2 D3 OS=Homo sapiens GN=UBE2D3 PE=3 SV=1;tr|H9KV45|H9KV45_HUMAN Ubiquitin-conjugating enzyme E2 D3	37334000	0	0	9333600	9333600	0	0	30910000	0	0	1	1	1	24.5	24.5	24.5	11.065	0	4.7576	37334000	1	9	1	0	0	1	0	0	1	0	0	24.5	0	0	1	0	0
122	A0A087WY88;Q8N5M9	A0A087WY88;Q8N5M9	Protein jagunal homolog 1	JAGN1	tr|A0A087WY88|A0A087WY88_HUMAN Protein jagunal homolog 1 OS=Homo sapiens GN=JAGN1 PE=1 SV=1;sp|Q8N5M9|JAGN1_HUMAN Protein jagunal homolog 1 OS=Homo sapiens GN=JAGN1 PE=1 SV=1	1816900000	328690000	1785800000	561630000	259560000	46955000	255110000	1424100000	969110000	1174500000	4	4	4	17.7	17.7	17.7	20.791	0	35.923	3931400000	24	2	4	2	3	4	2	3	4	2	3	17.7	13.8	13.8	9	6	9
123	A0A087WY96;P31641;A0A087WYN0;C9JPV1;P31641-2;H7C1B9	A0A087WY96;P31641;A0A087WYN0	Transporter;Sodium- and chloride-dependent taurine transporter	SLC6A6	tr|A0A087WY96|A0A087WY96_HUMAN Sodium- and chloride-dependent taurine transporter OS=Homo sapiens GN=SLC6A6 PE=4 SV=1;sp|P31641|SC6A6_HUMAN Sodium- and chloride-dependent taurine transporter OS=Homo sapiens GN=SLC6A6 PE=1 SV=2;tr|A0A087WYN0|A0A087WYN0_HUMA	182830000	79597000	417330000	26145000	7032100	3061400	16051000	191930000	245280000	257840000	6	5	5	10	9	9	81.338	0	13.653	679760000	12	6	4	3	6	3	2	5	3	2	5	6	4.6	10	3	2	7
124	F8VVN7;F8W098;H0YIA4;A0A087WYD4;Q9BVX2-2;Q9BVX2;F8W120;F8VWX5	F8VVN7;F8W098;H0YIA4;A0A087WYD4;Q9BVX2-2;Q9BVX2;F8W120;F8VWX5	Transmembrane protein 106C	TMEM106C	tr|F8VVN7|F8VVN7_HUMAN Transmembrane protein 106C OS=Homo sapiens GN=TMEM106C PE=4 SV=1;tr|F8W098|F8W098_HUMAN Transmembrane protein 106C OS=Homo sapiens GN=TMEM106C PE=4 SV=1;tr|H0YIA4|H0YIA4_HUMAN Transmembrane protein 106C (Fragment) OS=Homo sapiens GN=	21237000	0	107260000	42832000	7078900	0	35753000	15084000	0	0	2	2	2	58.3	58.3	58.3	9.4614	0.00034412	3.0234	128500000	2	8	1	0	1	1	0	1	1	0	1	20.2	0	38.1	1	0	1
125	A0A087WYD6;Q03519;E7ENX8;Q03519-2	A0A087WYD6;Q03519;E7ENX8;Q03519-2	Antigen peptide transporter 2	TAP2	tr|A0A087WYD6|A0A087WYD6_HUMAN Antigen peptide transporter 2 OS=Homo sapiens GN=TAP2 PE=1 SV=1;sp|Q03519|TAP2_HUMAN Antigen peptide transporter 2 OS=Homo sapiens GN=TAP2 PE=1 SV=1;tr|E7ENX8|E7ENX8_HUMAN Uncharacterized protein (Fragment) OS=Homo sapiens PE	1100700000	558470000	1185900000	83678000	32372000	16426000	34880000	1178500000	1287600000	1210800000	16	15	15	26.6	25.5	25.5	77.596	0	39.414	2845100000	41	4	11	9	9	10	8	8	10	8	8	18.7	16.7	17.2	16	11	14
126	A0A087WYF6;J3KP36;F8W7U3;E7ESD2;A0A096LPC5;Q9Y4E1-5;Q5SNT6;Q9Y4E1-3;Q9Y4E1-6;Q9Y4E1-2;Q9Y4E1;Q9Y4E1-4;Q641Q2-2;Q641Q2	A0A087WYF6;J3KP36;F8W7U3;E7ESD2;A0A096LPC5;Q9Y4E1-5;Q5SNT6;Q9Y4E1-3;Q9Y4E1-6;Q9Y4E1-2;Q9Y4E1;Q9Y4E1-4;Q641Q2-2;Q641Q2	WASH complex subunit FAM21C;WASH complex subunit FAM21B;WASH complex subunit FAM21A	FAM21A;FAM21C;FAM21B	tr|A0A087WYF6|A0A087WYF6_HUMAN WASH complex subunit FAM21A OS=Homo sapiens GN=FAM21A PE=4 SV=1;tr|J3KP36|J3KP36_HUMAN WASH complex subunit FAM21C OS=Homo sapiens GN=FAM21C PE=1 SV=2;tr|F8W7U3|F8W7U3_HUMAN WASH complex subunit FAM21A OS=Homo sapiens GN=FAM2	11657000	0	0	173980	173980	0	0	8279200	0	0	1	1	1	1.8	1.8	1.8	136.57	0.0058433	1.6807	11657000	1	14	1	0	0	1	0	0	1	0	0	1.8	0	0	1	0	0
127	A0A087WYF7;Q6UXV4;A0A087WUX8	A0A087WYF7;Q6UXV4;A0A087WUX8	MICOS complex subunit MIC27	APOOL	tr|A0A087WYF7|A0A087WYF7_HUMAN MICOS complex subunit MIC27 OS=Homo sapiens GN=APOOL PE=1 SV=1;sp|Q6UXV4|MIC27_HUMAN MICOS complex subunit MIC27 OS=Homo sapiens GN=APOOL PE=1 SV=1;tr|A0A087WUX8|A0A087WUX8_HUMAN MICOS complex subunit MIC27 OS=Homo sapiens GN	2146700000	702960000	2258800000	319280000	134170000	43935000	141170000	2013900000	2165800000	1671600000	12	12	12	56.7	56.7	56.7	29.205	0	56.058	5108500000	42	3	9	5	11	9	5	11	9	5	11	53	27.6	56.7	15	9	18
128	G3V1R5;A0A087WYK8;B1AKJ5;O43847;O43847-2;F5H7V1;H0Y5G9	G3V1R5;A0A087WYK8;B1AKJ5;O43847;O43847-2;F5H7V1;H0Y5G9	Nardilysin	NRD1	tr|G3V1R5|G3V1R5_HUMAN Nardilysin OS=Homo sapiens GN=NRD1 PE=1 SV=1;tr|A0A087WYK8|A0A087WYK8_HUMAN Nardilysin OS=Homo sapiens GN=NRD1 PE=1 SV=1;tr|B1AKJ5|B1AKJ5_HUMAN Nardilysin OS=Homo sapiens GN=NRD1 PE=1 SV=1;sp|O43847|NRDC_HUMAN Nardilysin OS=Homo sapi	57223000	0	84994000	2902400	1167800	0	1734600	62269000	0	56752000	5	5	5	4.6	4.6	4.6	125.12	0.00017596	3.4173	142220000	5	7	2	0	5	2	0	5	2	0	5	1.6	0	4.6	1	0	4
129	A0A087WYL5;Q6UXD5-6;Q6UXD5-2;Q6UXD5-3;Q6UXD5-5;Q6UXD5;H3BN26;Q6UXD5-4;A0A087WXL7;F5H2J1;O43303-2;O43303;Q8WXR4-6;Q8WXR4-3;Q8WXR4-5;Q8WXR4-2;Q8WXR4-4;Q8WXR4;Q8WXR4-7	A0A087WYL5;Q6UXD5-6;Q6UXD5-2;Q6UXD5-3;Q6UXD5-5;Q6UXD5;H3BN26;Q6UXD5-4	Seizure 6-like protein 2	SEZ6L2	tr|A0A087WYL5|A0A087WYL5_HUMAN Seizure 6-like protein 2 OS=Homo sapiens GN=SEZ6L2 PE=4 SV=1;sp|Q6UXD5-6|SE6L2_HUMAN Isoform 6 of Seizure 6-like protein 2 OS=Homo sapiens GN=SEZ6L2;sp|Q6UXD5-2|SE6L2_HUMAN Isoform 2 of Seizure 6-like protein 2 OS=Homo sapien	182910000	34727000	184990000	12988000	5900400	1120200	5967400	108020000	172760000	93567000	4	3	3	8	7.4	7.4	99.133	0	39.509	402630000	6	19	4	1	3	3	1	2	3	1	2	8	3.4	5.7	3	1	2
130	A0A087WYN9;Q7Z478;H0Y8L1	A0A087WYN9;Q7Z478	ATP-dependent RNA helicase DHX29	DHX29	tr|A0A087WYN9|A0A087WYN9_HUMAN ATP-dependent RNA helicase DHX29 OS=Homo sapiens GN=DHX29 PE=1 SV=1;sp|Q7Z478|DHX29_HUMAN ATP-dependent RNA helicase DHX29 OS=Homo sapiens GN=DHX29 PE=1 SV=2	378780000	5152000	151160000	6525600	4619300	62829	1843400	265910000	19799000	161220000	15	15	14	15.5	15.5	14.7	155.29	0	43.159	535100000	21	3	12	1	8	12	1	8	11	1	7	12.6	0.9	8.8	12	1	8
131	A0A087WYR3;O43399;O43399-5;O43399-7;A0A087WZ51	A0A087WYR3;O43399;O43399-5;O43399-7;A0A087WZ51	Tumor protein D54	TPD52L2	tr|A0A087WYR3|A0A087WYR3_HUMAN Tumor protein D54 OS=Homo sapiens GN=TPD52L2 PE=1 SV=1;sp|O43399|TPD54_HUMAN Tumor protein D54 OS=Homo sapiens GN=TPD52L2 PE=1 SV=2;sp|O43399-5|TPD54_HUMAN Isoform 5 of Tumor protein D54 OS=Homo sapiens GN=TPD52L2;sp|O43399-7	4802700000	1866800000	3733000000	611910000	282510000	109810000	219590000	3643100000	4511100000	3627400000	15	15	3	55	55	9.9	23.764	0	323.31	10402000000	92	5	15	12	13	15	12	13	3	1	3	55	51.4	55	38	25	29
132	A0A087WYT3;Q15185-4;Q15185;Q15185-3;B4DDC6;Q15185-2	A0A087WYT3;Q15185-4;Q15185;Q15185-3	Prostaglandin E synthase 3	PTGES3	tr|A0A087WYT3|A0A087WYT3_HUMAN Prostaglandin E synthase 3 OS=Homo sapiens GN=PTGES3 PE=1 SV=1;sp|Q15185-4|TEBP_HUMAN Isoform 4 of Prostaglandin E synthase 3 OS=Homo sapiens GN=PTGES3;sp|Q15185|TEBP_HUMAN Prostaglandin E synthase 3 OS=Homo sapiens GN=PTGES3	1667100000	256480000	1467400000	376780000	185230000	28497000	163050000	1182000000	1212600000	1016600000	5	5	5	36	36	36	19.155	0	49.089	3391000000	20	6	5	3	4	5	3	4	5	3	4	36	24.4	28.7	8	4	8
133	A0A087WYU1;Q9Y5X1	A0A087WYU1;Q9Y5X1	Sorting nexin;Sorting nexin-9	SNX9	tr|A0A087WYU1|A0A087WYU1_HUMAN Sorting nexin-9 OS=Homo sapiens GN=SNX9 PE=1 SV=1;sp|Q9Y5X1|SNX9_HUMAN Sorting nexin-9 OS=Homo sapiens GN=SNX9 PE=1 SV=1	1275000000	1584100000	2968500000	208130000	45537000	56575000	106020000	2310500000	2698000000	2254100000	7	7	7	15.5	15.5	15.5	66.476	0	10.559	5827600000	19	2	6	4	3	6	4	3	6	4	3	13.1	8.6	6.1	6	7	6
134	H3BS73;H3BRT2;H3BQ55;H3BNT3;H3BNB2;H3BMF3;A0A087WYU2;Q96S19-3;Q96S19-5;Q96S19-2;Q96S19-6;Q96S19;Q96S19-4	H3BS73;H3BRT2;H3BQ55;H3BNT3;H3BNB2;H3BMF3;A0A087WYU2;Q96S19-3;Q96S19-5;Q96S19-2;Q96S19-6;Q96S19;Q96S19-4	UPF0585 protein C16orf13	C16orf13	tr|H3BS73|H3BS73_HUMAN UPF0585 protein C16orf13 OS=Homo sapiens GN=C16orf13 PE=1 SV=1;tr|H3BRT2|H3BRT2_HUMAN UPF0585 protein C16orf13 (Fragment) OS=Homo sapiens GN=C16orf13 PE=4 SV=1;tr|H3BQ55|H3BQ55_HUMAN UPF0585 protein C16orf13 (Fragment) OS=Homo sapien	13648000	0	0	1949700	1949700	0	0	7851300	0	0	1	1	1	16.5	16.5	16.5	11.138	0.0011515	2.3449	13648000	2	13	1	0	0	1	0	0	1	0	0	16.5	0	0	2	0	0
135	A0A087WYY1;Q9Y646;E5RJA8;E5RH35;E5RJZ7;E5RJP8	A0A087WYY1;Q9Y646;E5RJA8	Carboxypeptidase Q	CPQ	tr|A0A087WYY1|A0A087WYY1_HUMAN Carboxypeptidase Q OS=Homo sapiens GN=CPQ PE=4 SV=1;sp|Q9Y646|CBPQ_HUMAN Carboxypeptidase Q OS=Homo sapiens GN=CPQ PE=1 SV=1;tr|E5RJA8|E5RJA8_HUMAN Carboxypeptidase Q (Fragment) OS=Homo sapiens GN=CPQ PE=4 SV=1	204470000	32281000	199450000	16777000	7864200	1241600	7671200	190520000	79661000	173590000	9	9	9	24.6	24.6	24.6	59.744	0	21.082	436200000	15	6	5	3	6	5	3	6	5	3	6	13.9	7.8	17.4	5	3	7
136	E9PKS4;B3KUF4;A0A087WZ09;P43694;P43694-2	E9PKS4;B3KUF4;A0A087WZ09;P43694;P43694-2	Transcription factor GATA-4	GATA4	tr|E9PKS4|E9PKS4_HUMAN Transcription factor GATA-4 (Fragment) OS=Homo sapiens GN=GATA4 PE=4 SV=1;tr|B3KUF4|B3KUF4_HUMAN Transcription factor GATA-4 OS=Homo sapiens GN=GATA4 PE=1 SV=1;tr|A0A087WZ09|A0A087WZ09_HUMAN Transcription factor GATA-4 OS=Homo sapien	35897000	17534000	58285000	12413000	3988600	1948300	6476100	52631000	47013000	44313000	2	2	2	17.7	17.7	17.7	19.013	0	8.7002	111720000	5	5	1	2	2	1	2	2	1	2	2	9.7	17.7	17.7	1	2	2
137	A0A087WZ13;E9PAU2;Q8IY67-2;Q8IY67;K7EQG2;K7EKR9;Q8IY67-3	A0A087WZ13;E9PAU2;Q8IY67-2;Q8IY67	Ribonucleoprotein PTB-binding 1	RAVER1	tr|A0A087WZ13|A0A087WZ13_HUMAN Ribonucleoprotein PTB-binding 1 OS=Homo sapiens GN=RAVER1 PE=1 SV=1;tr|E9PAU2|E9PAU2_HUMAN Ribonucleoprotein PTB-binding 1 OS=Homo sapiens GN=RAVER1 PE=1 SV=1;sp|Q8IY67-2|RAVR1_HUMAN Isoform 2 of Ribonucleoprotein PTB-binding	819460000	261840000	740570000	56933000	25608000	8182400	23143000	683460000	644420000	590990000	19	19	19	49.5	49.5	49.5	77.843	0	69.754	1821900000	44	7	11	9	11	11	9	11	11	9	11	29.8	21.8	23.4	19	10	15
138	A0A087WZ32;A0A087X038;A8K727;Q9HB19	A0A087WZ32;A0A087X038;A8K727;Q9HB19	Pleckstrin homology domain-containing family A member 2	PLEKHA2	tr|A0A087WZ32|A0A087WZ32_HUMAN Pleckstrin homology domain-containing family A member 2 OS=Homo sapiens GN=PLEKHA2 PE=1 SV=1;tr|A0A087X038|A0A087X038_HUMAN Pleckstrin homology domain-containing family A member 2 OS=Homo sapiens GN=PLEKHA2 PE=1 SV=1;tr|A8K72	173300000	38360000	377570000	22663000	6665500	1475400	14522000	265570000	93171000	273600000	1	1	1	5.9	5.9	5.9	41.21	0.00066313	2.4731	589230000	5	4	1	1	1	1	1	1	1	1	1	5.9	5.9	5.9	1	1	3
139	A0A087WZ50;Q8TCT7-3;Q8TCT7-2;Q8TCT7-4;Q8TCT7;A0A087WZ93;A0A087WWL4	A0A087WZ50;Q8TCT7-3;Q8TCT7-2;Q8TCT7-4;Q8TCT7;A0A087WZ93	Signal peptide peptidase-like 2B	SPPL2B	tr|A0A087WZ50|A0A087WZ50_HUMAN Signal peptide peptidase-like 2B OS=Homo sapiens GN=SPPL2B PE=4 SV=1;sp|Q8TCT7-3|SPP2B_HUMAN Isoform 3 of Signal peptide peptidase-like 2B OS=Homo sapiens GN=SPPL2B;sp|Q8TCT7-2|SPP2B_HUMAN Isoform 2 of Signal peptide peptidas	84662000	0	90730000	10962000	5291400	0	5670600	78481000	0	65737000	4	4	4	16.8	16.8	16.8	32.549	0	4.653	175390000	5	7	2	0	3	2	0	3	2	0	3	7.9	0	11.3	2	0	3
140	A0A087WZ62;Q9H6U8;Q9H6U8-3;H0YCW6;Q9H6U8-2;Q9H6U8-4;A0A087WTZ3;A0A087WVC0;A0A087WZY8;A0A087WX16;A0A087WV58	A0A087WZ62;Q9H6U8;Q9H6U8-3;H0YCW6;Q9H6U8-2;Q9H6U8-4	Alpha-1,2-mannosyltransferase ALG9	ALG9	tr|A0A087WZ62|A0A087WZ62_HUMAN Alpha-1,2-mannosyltransferase ALG9 OS=Homo sapiens GN=ALG9 PE=4 SV=1;sp|Q9H6U8|ALG9_HUMAN Alpha-1,2-mannosyltransferase ALG9 OS=Homo sapiens GN=ALG9 PE=1 SV=2;sp|Q9H6U8-3|ALG9_HUMAN Isoform 3 of Alpha-1,2-mannosyltransferase	622680000	312670000	1071700000	50177000	15567000	7816700	26793000	650010000	852600000	773420000	11	11	11	15.4	15.4	15.4	95.921	0	64.471	2007100000	33	11	6	8	8	6	8	8	6	8	8	9.2	12.4	11.5	10	11	12
141	A0A087WZ95;Q8N3J9	A0A087WZ95;Q8N3J9	Zinc finger protein 664	ZNF664	tr|A0A087WZ95|A0A087WZ95_HUMAN Zinc finger protein 664 OS=Homo sapiens GN=ZNF664 PE=4 SV=1;sp|Q8N3J9|ZN664_HUMAN Zinc finger protein 664 OS=Homo sapiens GN=ZNF664 PE=2 SV=1	47331000	10757000	42386000	5581900	2629500	597600	2354800	34717000	25222000	39216000	1	1	1	13.1	13.1	13.1	22.638	0.00034965	3.2895	100470000	5	2	1	1	1	1	1	1	1	1	1	13.1	13.1	13.1	3	0	2
142	A0A087WZK6;A0A087X2C2;A0A087WZ97;Q5T7M9	A0A087WZK6;A0A087X2C2;A0A087WZ97;Q5T7M9	Protein FAM69A	FAM69A	tr|A0A087WZK6|A0A087WZK6_HUMAN Protein FAM69A OS=Homo sapiens GN=FAM69A PE=4 SV=1;tr|A0A087X2C2|A0A087X2C2_HUMAN Protein FAM69A OS=Homo sapiens GN=FAM69A PE=4 SV=1;tr|A0A087WZ97|A0A087WZ97_HUMAN Protein FAM69A OS=Homo sapiens GN=FAM69A PE=4 SV=1;sp|Q5T7M9|	134380000	36134000	19578000	9504900	6719200	1806700	978910	66648000	83443000	55672000	5	5	5	19.5	19.5	19.5	42.122	0.00050344	2.6799	190100000	5	4	5	1	1	5	1	1	5	1	1	19.5	3.3	3.3	3	1	1
143	A0A087WZF1;Q93052	A0A087WZF1;Q93052	Lipoma-preferred partner	LPP	tr|A0A087WZF1|A0A087WZF1_HUMAN Lipoma-preferred partner OS=Homo sapiens GN=LPP PE=1 SV=1;sp|Q93052|LPP_HUMAN Lipoma-preferred partner OS=Homo sapiens GN=LPP PE=1 SV=1	0	0	17797000	684510	0	0	684510	0	0	14666000	1	1	1	4.1	4.1	4.1	63.382	0.00034118	2.8786	17797000	1	2	0	0	1	0	0	1	0	0	1	0	0	4.1	0	0	1
144	A0A087WZH7;P29966	A0A087WZH7;P29966	Myristoylated alanine-rich C-kinase substrate	MARCKS	tr|A0A087WZH7|A0A087WZH7_HUMAN Myristoylated alanine-rich C-kinase substrate OS=Homo sapiens GN=MARCKS PE=1 SV=1;sp|P29966|MARCS_HUMAN Myristoylated alanine-rich C-kinase substrate OS=Homo sapiens GN=MARCKS PE=1 SV=4	5046600000	4602700000	4271100000	818840000	296860000	270740000	251240000	5892000000	9031500000	5672100000	6	6	6	30.9	30.9	30.9	31.595	0	144.57	13920000000	39	2	4	6	5	4	6	5	4	6	5	25.5	30.9	25.8	11	20	8
145	A0A087WZL0;Q86UU1-3;Q86UU1-2;Q86UU1	A0A087WZL0;Q86UU1-3;Q86UU1-2;Q86UU1	Pleckstrin homology-like domain family B member 1	PHLDB1	tr|A0A087WZL0|A0A087WZL0_HUMAN Pleckstrin homology-like domain family B member 1 (Fragment) OS=Homo sapiens GN=PHLDB1 PE=4 SV=1;sp|Q86UU1-3|PHLB1_HUMAN Isoform 3 of Pleckstrin homology-like domain family B member 1 OS=Homo sapiens GN=PHLDB1;sp|Q86UU1-2|PHL	36212000	0	0	952950	952950	0	0	25910000	0	0	2	2	2	3.7	3.7	3.7	73.104	0.0011421	2.2304	36212000	1	4	2	0	0	2	0	0	2	0	0	3.7	0	0	1	0	0
146	A0A087WZM8;Q8TBM7-2;Q8TBM7-3;Q8TBM7	A0A087WZM8;Q8TBM7-2;Q8TBM7-3;Q8TBM7	Transmembrane protein 254	TMEM254	tr|A0A087WZM8|A0A087WZM8_HUMAN Transmembrane protein 254 OS=Homo sapiens GN=TMEM254 PE=1 SV=1;sp|Q8TBM7-2|TM254_HUMAN Isoform 2 of Transmembrane protein 254 OS=Homo sapiens GN=TMEM254;sp|Q8TBM7-3|TM254_HUMAN Isoform 3 of Transmembrane protein 254 OS=Homo s	55928000	0	11997000	11321000	9321300	0	1999500	39978000	0	12554000	1	1	1	10.9	10.9	10.9	11.139	0.00034941	3.2682	67925000	2	4	1	0	1	1	0	1	1	0	1	10.9	0	10.9	1	0	1
147	A0A087WZN1;O43837;A0A087X2E5;O43837-2;O43837-3	A0A087WZN1;O43837;A0A087X2E5;O43837-2	Isocitrate dehydrogenase [NAD] subunit, mitochondrial;Isocitrate dehydrogenase [NAD] subunit beta, mitochondrial	IDH3B	tr|A0A087WZN1|A0A087WZN1_HUMAN Isocitrate dehydrogenase 3 (NAD+) beta, isoform CRA_d OS=Homo sapiens GN=IDH3B PE=1 SV=1;sp|O43837|IDH3B_HUMAN Isocitrate dehydrogenase [NAD] subunit beta, mitochondrial OS=Homo sapiens GN=IDH3B PE=1 SV=2;tr|A0A087X2E5|A0A087	8075300000	2312100000	9562700000	867400000	351100000	100530000	415770000	6550500000	6054000000	6760300000	22	22	22	58.9	58.9	58.9	42.41	0	199.8	19950000000	127	5	19	15	18	19	15	18	19	15	18	52.5	50.4	54.5	51	27	49
148	A0A087WZN3;Q6UWP2-2;Q6UWP2	A0A087WZN3;Q6UWP2-2;Q6UWP2	Dehydrogenase/reductase SDR family member 11	DHRS11	tr|A0A087WZN3|A0A087WZN3_HUMAN Dehydrogenase/reductase SDR family member 11 (Fragment) OS=Homo sapiens GN=DHRS11 PE=1 SV=1;sp|Q6UWP2-2|DHR11_HUMAN Isoform 2 of Dehydrogenase/reductase SDR family member 11 OS=Homo sapiens GN=DHRS11;sp|Q6UWP2|DHR11_HUMAN Deh	37742000	0	23688000	5584600	3431100	0	2153500	16952000	0	28109000	1	1	1	10.7	10.7	10.7	16.615	0.0092994	1.4451	61430000	3	3	1	0	1	1	0	1	1	0	1	10.7	0	10.7	1	0	2
149	A0A087WZP7;Q86WG5-3;Q86WG5	A0A087WZP7;Q86WG5-3;Q86WG5	Myotubularin-related protein 13	SBF2	tr|A0A087WZP7|A0A087WZP7_HUMAN Myotubularin-related protein 13 OS=Homo sapiens GN=SBF2 PE=1 SV=1;sp|Q86WG5-3|MTMRD_HUMAN Isoform 3 of Myotubularin-related protein 13 OS=Homo sapiens GN=SBF2;sp|Q86WG5|MTMRD_HUMAN Myotubularin-related protein 13 OS=Homo sapi	0	0	12896000	134330	0	0	134330	0	0	11499000	1	1	1	1	1	1	203.14	0.0038486	1.8907	12896000	1	3	0	0	1	0	0	1	0	0	1	0	0	1	0	0	1
150	A0A087X105;A0A087WZW4;A0A087X1W8;A0A087WZR6;X5DQS5;Q9BY67-5;Q9BY67;Q9BY67-4;Q9BY67-3;A0A087X0T8;Q9BY67-2;F5H125;H0YG94;F5H8J9;F5H0H5	A0A087X105;A0A087WZW4;A0A087X1W8;A0A087WZR6;X5DQS5;Q9BY67-5;Q9BY67;Q9BY67-4;Q9BY67-3;A0A087X0T8;Q9BY67-2	Cell adhesion molecule 1	CADM1	tr|A0A087X105|A0A087X105_HUMAN Cell adhesion molecule 1 OS=Homo sapiens GN=CADM1 PE=1 SV=1;tr|A0A087WZW4|A0A087WZW4_HUMAN Cell adhesion molecule 1 OS=Homo sapiens GN=CADM1 PE=1 SV=1;tr|A0A087X1W8|A0A087X1W8_HUMAN Cell adhesion molecule 1 OS=Homo sapiens GN	8288300000	2850500000	7047300000	727440000	331530000	114020000	281890000	6193100000	6475800000	5908100000	15	15	15	47.2	47.2	47.2	41.667	0	292.04	18186000000	105	15	14	12	13	14	12	13	14	12	13	47.2	44.2	47.2	33	34	38
151	A0A087WZT2;Q6UX53	A0A087WZT2;Q6UX53	Methyltransferase-like protein 7B	METTL7B	tr|A0A087WZT2|A0A087WZT2_HUMAN Methyltransferase-like protein 7B OS=Homo sapiens GN=METTL7B PE=4 SV=1;sp|Q6UX53|MET7B_HUMAN Methyltransferase-like protein 7B OS=Homo sapiens GN=METTL7B PE=2 SV=2	2211400000	857980000	1754000000	301460000	138220000	53624000	109620000	2023800000	1485100000	1976900000	12	12	12	50.4	50.4	50.4	31.288	0	108.31	4823400000	50	2	10	10	10	10	10	10	10	10	10	45.7	43.1	39.9	20	16	14
152	E5RGN0;A0A087WZU2;Q00536;Q00536-3;Q00536-2;E5RIY8;E5RIU4;E5RJM2;H0YAZ9;H0YBX5	E5RGN0;A0A087WZU2;Q00536;Q00536-3;Q00536-2;E5RIY8;E5RIU4;E5RJM2;H0YAZ9	Cyclin-dependent kinase 16	CDK16	tr|E5RGN0|E5RGN0_HUMAN Cyclin-dependent kinase 16 (Fragment) OS=Homo sapiens GN=CDK16 PE=1 SV=1;tr|A0A087WZU2|A0A087WZU2_HUMAN Cyclin-dependent kinase 16 OS=Homo sapiens GN=CDK16 PE=1 SV=1;sp|Q00536|CDK16_HUMAN Cyclin-dependent kinase 16 OS=Homo sapiens GN	235280000	162670000	0	15306000	9049400	6256600	0	271700000	315030000	0	4	3	3	12	9.9	9.9	44.129	0	7.2544	397960000	4	10	4	2	1	3	1	0	3	1	0	12	4.1	2	2	2	0
153	D6R9P3;D6RD18;D6RBZ0;A0A087WZV1;Q99729-3;Q99729-2;Q99729-4;Q99729	D6R9P3;D6RD18;D6RBZ0;A0A087WZV1;Q99729-3;Q99729-2;Q99729-4;Q99729	Heterogeneous nuclear ribonucleoprotein A/B	HNRNPAB	tr|D6R9P3|D6R9P3_HUMAN Heterogeneous nuclear ribonucleoprotein A/B OS=Homo sapiens GN=HNRNPAB PE=1 SV=1;tr|D6RD18|D6RD18_HUMAN Heterogeneous nuclear ribonucleoprotein A/B OS=Homo sapiens GN=HNRNPAB PE=1 SV=1;tr|D6RBZ0|D6RBZ0_HUMAN Heterogeneous nuclear rib	12360000000	5705200000	13422000000	2249100000	882830000	407510000	958720000	11032000000	12484000000	14276000000	15	15	15	36.1	36.1	36.1	30.302	0	91.133	31487000000	128	8	13	12	15	13	12	15	13	12	15	35.7	35	36.1	40	46	42
154	A0A087X020;Q9Y3A5;F8WE72	A0A087X020;Q9Y3A5	Ribosome maturation protein SBDS	SBDS	tr|A0A087X020|A0A087X020_HUMAN Ribosome maturation protein SBDS OS=Homo sapiens GN=SBDS PE=1 SV=1;sp|Q9Y3A5|SBDS_HUMAN Ribosome maturation protein SBDS OS=Homo sapiens GN=SBDS PE=1 SV=4	116480000	36211000	224530000	22190000	6852000	2130100	13208000	189410000	0	134340000	7	7	7	32.8	32.8	32.8	28.864	0	14.149	377230000	11	3	3	2	6	3	2	6	3	2	6	14.4	7.6	28.8	3	2	6
155	A0A087X0A8;D6RGG3;Q99715-2;Q99715-4;Q99715	A0A087X0A8;D6RGG3;Q99715-2;Q99715-4;Q99715	Collagen alpha-1(XII) chain	COL12A1	tr|A0A087X0A8|A0A087X0A8_HUMAN Collagen alpha-1(XII) chain OS=Homo sapiens GN=COL12A1 PE=1 SV=1;tr|D6RGG3|D6RGG3_HUMAN Collagen alpha-1(XII) chain OS=Homo sapiens GN=COL12A1 PE=1 SV=1;sp|Q99715-2|COCA1_HUMAN Isoform 2 of Collagen alpha-1(XII) chain OS=Homo	67899000	0	31291000	935760	640560	0	295200	37760000	0	31624000	2	2	2	1.1	1.1	1.1	203.11	0.0016268	2.1727	99191000	5	5	2	0	1	2	0	1	2	0	1	1.1	0	0.6	3	0	2
156	A0A087X0D5;P09668	A0A087X0D5;P09668	Pro-cathepsin H;Cathepsin H mini chain;Cathepsin H;Cathepsin H heavy chain;Cathepsin H light chain	CTSH	tr|A0A087X0D5|A0A087X0D5_HUMAN Pro-cathepsin H OS=Homo sapiens GN=CTSH PE=1 SV=1;sp|P09668|CATH_HUMAN Pro-cathepsin H OS=Homo sapiens GN=CTSH PE=1 SV=4	677530000	84564000	493160000	78453000	42345000	5285200	30823000	511120000	235460000	508790000	11	11	6	39.3	39.3	19.5	36.269	0	23.53	1255300000	22	2	10	5	7	10	5	7	5	4	4	38.1	19.2	29.1	9	7	6
157	A0A087X0I4;O14579;M0QXB4;O14579-3;O14579-2;M0R061	A0A087X0I4;O14579;M0QXB4;O14579-3;O14579-2	Coatomer subunit epsilon	COPE	tr|A0A087X0I4|A0A087X0I4_HUMAN Coatomer subunit epsilon OS=Homo sapiens GN=COPE PE=1 SV=1;sp|O14579|COPE_HUMAN Coatomer subunit epsilon OS=Homo sapiens GN=COPE PE=1 SV=3;tr|M0QXB4|M0QXB4_HUMAN Coatomer protein complex, subunit epsilon, isoform CRA_g OS=Hom	1247700000	343420000	1125400000	123480000	56713000	15610000	51157000	966080000	842130000	924780000	11	11	11	58.3	58.3	58.3	34.51	0	82.81	2716600000	42	6	10	7	8	10	7	8	10	7	8	58	31.9	37.5	17	10	15
158	A0A087X0L8;Q7Z412;Q7Z412-2;E9PRC5	A0A087X0L8;Q7Z412;Q7Z412-2	Peroxisome assembly protein 26	PEX26	tr|A0A087X0L8|A0A087X0L8_HUMAN Peroxisome assembly protein 26 OS=Homo sapiens GN=PEX26 PE=1 SV=1;sp|Q7Z412|PEX26_HUMAN Peroxisome assembly protein 26 OS=Homo sapiens GN=PEX26 PE=1 SV=2;sp|Q7Z412-2|PEX26_HUMAN Isoform 2 of Peroxisome assembly protein 26 OS=	12602000	4312200	40470000	2732600	600120	205340	1927100	0	22710000	27750000	3	3	3	15.3	15.3	15.3	39.853	0	5.5529	57385000	4	4	1	1	2	1	1	2	1	1	2	2.5	6.8	12.9	1	1	2
159	A0A087X0M4;Q9BWU0;A0A087WWF4;H7C256	A0A087X0M4;Q9BWU0	Kanadaptin	SLC4A1AP	tr|A0A087X0M4|A0A087X0M4_HUMAN Kanadaptin OS=Homo sapiens GN=SLC4A1AP PE=1 SV=1;sp|Q9BWU0|NADAP_HUMAN Kanadaptin OS=Homo sapiens GN=SLC4A1AP PE=1 SV=1	228610000	40587000	84512000	7218600	4665600	828310	1724700	195110000	79815000	82972000	11	11	11	18.5	18.5	18.5	82.89	0	13.44	353710000	13	4	8	4	4	8	4	4	8	4	4	14.7	5	7.8	8	1	4
160	A0A087X0N2;O15243	A0A087X0N2;O15243	Leptin receptor gene-related protein	LEPROT	tr|A0A087X0N2|A0A087X0N2_HUMAN Leptin receptor gene-related protein OS=Homo sapiens GN=LEPROT PE=4 SV=1;sp|O15243|OBRG_HUMAN Leptin receptor gene-related protein OS=Homo sapiens GN=LEPROT PE=1 SV=1	0	33378000	0	8344500	0	8344500	0	0	101150000	0	1	1	1	9.3	9.3	9.3	15.428	0.004164	1.8754	33378000	1	2	0	1	0	0	1	0	0	1	0	0	9.3	0	0	1	0
161	A0A087X0N3;Q96MY1;A0A087WTU5;Q96MY1-2;O94818-4;O94818-3;O94818;K7EQ17;O94818-2	A0A087X0N3;Q96MY1;A0A087WTU5;Q96MY1-2	Nucleolar protein 4-like	NOL4L	tr|A0A087X0N3|A0A087X0N3_HUMAN Nucleolar protein 4-like OS=Homo sapiens GN=NOL4L PE=1 SV=1;sp|Q96MY1|NOL4L_HUMAN Nucleolar protein 4-like OS=Homo sapiens GN=NOL4L PE=1 SV=2;tr|A0A087WTU5|A0A087WTU5_HUMAN Nucleolar protein 4-like OS=Homo sapiens GN=NOL4L PE	315150000	25085000	137480000	15410000	10166000	809190	4434800	171900000	0	218230000	10	10	10	17.9	17.9	17.9	74.224	0	18.445	477710000	17	9	8	3	4	8	3	4	8	3	4	14.4	5	10.3	9	4	4
162	A0A087X0W7;A0A087WT95;P49753;P49753-2	A0A087X0W7;A0A087WT95;P49753;P49753-2	Acyl-coenzyme A thioesterase 2, mitochondrial	ACOT2	tr|A0A087X0W7|A0A087X0W7_HUMAN Acyl-coenzyme A thioesterase 2, mitochondrial OS=Homo sapiens GN=ACOT2 PE=4 SV=1;tr|A0A087WT95|A0A087WT95_HUMAN Acyl-coenzyme A thioesterase 2, mitochondrial OS=Homo sapiens GN=ACOT2 PE=4 SV=1;sp|P49753|ACOT2_HUMAN Acyl-coenz	16649000000	5591300000	13012000000	1305700000	616640000	207090000	481940000	14915000000	10345000000	13042000000	26	26	2	77.4	77.4	7.1	46.292	0	258.87	35253000000	189	4	23	22	23	23	22	23	2	1	2	70.8	64.8	77.2	60	67	62
163	A0A087X0W9;Q8N6M0-2;Q8N6M0	A0A087X0W9;Q8N6M0-2;Q8N6M0	OTU domain-containing protein 6B	OTUD6B	tr|A0A087X0W9|A0A087X0W9_HUMAN OTU domain containing 6B, isoform CRA_b OS=Homo sapiens GN=OTUD6B PE=1 SV=1;sp|Q8N6M0-2|OTU6B_HUMAN Isoform 2 of OTU domain-containing protein 6B OS=Homo sapiens GN=OTUD6B;sp|Q8N6M0|OTU6B_HUMAN OTU domain-containing protein 6	0	0	18202000	1213500	0	0	1213500	0	0	16230000	1	1	1	8.7	8.7	8.7	37.325	0.00017575	3.398	18202000	1	3	0	0	1	0	0	1	0	0	1	0	0	8.7	0	0	1
164	A0A087X117;Q15155;A0A087WW46;H3BUC9;I3L0Q6;H3BTW1	A0A087X117;Q15155;A0A087WW46	Nodal modulator 1	NOMO1	tr|A0A087X117|A0A087X117_HUMAN Nodal modulator 1 OS=Homo sapiens GN=NOMO1 PE=4 SV=1;sp|Q15155|NOMO1_HUMAN Nodal modulator 1 OS=Homo sapiens GN=NOMO1 PE=1 SV=5;tr|A0A087WW46|A0A087WW46_HUMAN Nodal modulator 1 OS=Homo sapiens GN=NOMO1 PE=4 SV=1	468440000	352110000	139120000	13329000	6506000	4890400	1932200	505940000	433340000	410380000	51	3	3	58.8	2.7	2.7	139.47	0	73.227	959660000	14	6	50	46	47	3	2	3	3	2	3	58.3	54.5	56.2	4	6	4
165	A0A087X142;A6NMH6;A6NFQ9;F8W8I8;Q92599-2;Q92599-4;Q92599;Q92599-3;C9J4G8;C9JV02	A0A087X142;A6NMH6;A6NFQ9;F8W8I8;Q92599-2;Q92599-4;Q92599;Q92599-3	Septin-8	2008-09-01	tr|A0A087X142|A0A087X142_HUMAN Septin-8 OS=Homo sapiens GN=SEPT8 PE=1 SV=1;tr|A6NMH6|A6NMH6_HUMAN Septin-8 OS=Homo sapiens GN=SEPT8 PE=1 SV=1;tr|A6NFQ9|A6NFQ9_HUMAN Septin-8 OS=Homo sapiens GN=SEPT8 PE=1 SV=1;tr|F8W8I8|F8W8I8_HUMAN Septin-8 OS=Homo sapiens	105910000	12309000	6118100	5180900	4413100	512890	254920	84037000	0	0	7	5	5	21.8	16	16	49.355	0	6.9765	124340000	5	10	4	1	3	3	1	1	3	1	1	17.6	2.6	10.8	3	1	1
166	A0A087X165;Q9C0H9-5;A0A087WVV7;Q9C0H9-2;Q9C0H9;A0A087WU33;Q9C0H9-4	A0A087X165;Q9C0H9-5;A0A087WVV7;Q9C0H9-2;Q9C0H9	SRC kinase signaling inhibitor 1	SRCIN1	tr|A0A087X165|A0A087X165_HUMAN SRC kinase-signaling inhibitor 1 OS=Homo sapiens GN=SRCIN1 PE=4 SV=1;sp|Q9C0H9-5|SRCN1_HUMAN Isoform 4 of SRC kinase signaling inhibitor 1 OS=Homo sapiens GN=SRCIN1;tr|A0A087WVV7|A0A087WVV7_HUMAN SRC kinase-signaling inhibito	376320000	60835000	384840000	10024000	4589300	741880	4693200	256350000	180040000	386460000	17	17	17	24.3	24.3	24.3	130.46	0	52.671	821990000	27	7	13	4	10	13	4	10	13	4	10	19.6	7.8	14.5	13	4	10
167	A0A087X1E4;P53365-2;P53365-3;P53365	A0A087X1E4;P53365-2;P53365-3;P53365	Arfaptin-2	ARFIP2	tr|A0A087X1E4|A0A087X1E4_HUMAN Arfaptin-2 OS=Homo sapiens GN=ARFIP2 PE=1 SV=1;sp|P53365-2|ARFP2_HUMAN Isoform 2 of Arfaptin-2 OS=Homo sapiens GN=ARFIP2;sp|P53365-3|ARFP2_HUMAN Isoform 3 of Arfaptin-2 OS=Homo sapiens GN=ARFIP2;sp|P53365|ARFP2_HUMAN Arfaptin	30913000	7472300	0	1476300	1189000	287390	0	18900000	0	0	2	2	2	8	8	8	41.595	0.00033841	2.7819	38385000	2	4	1	1	0	1	1	0	1	1	0	3.7	4.3	0	1	1	0
168	B7ZBQ3;A0A087X1F4;Q9H944-2;Q9H944;B7ZBQ1;A6PVP4	B7ZBQ3;A0A087X1F4;Q9H944-2;Q9H944;B7ZBQ1;A6PVP4	Mediator of RNA polymerase II transcription subunit 20	MED20	tr|B7ZBQ3|B7ZBQ3_HUMAN Mediator of RNA polymerase II transcription subunit 20 OS=Homo sapiens GN=MED20 PE=1 SV=1;tr|A0A087X1F4|A0A087X1F4_HUMAN Mediator of RNA polymerase II transcription subunit 20 OS=Homo sapiens GN=MED20 PE=1 SV=1;sp|Q9H944-2|MED20_HUMA	58198000	0	0	7274800	7274800	0	0	35736000	0	0	2	2	2	17.2	17.2	17.2	15.923	0	8.2572	58198000	4	6	2	1	1	2	1	1	2	1	1	17.2	9.7	7.6	2	1	1
169	A0A087X1G7;O60613;A0A087WXL0;A8MZD0;O60613-2	A0A087X1G7;O60613	15 kDa selenoprotein	2015-09-01	tr|A0A087X1G7|A0A087X1G7_HUMAN 15 kDa selenoprotein OS=Homo sapiens GN=SEP15 PE=4 SV=1;sp|O60613|SEP15_HUMAN 15 kDa selenoprotein OS=Homo sapiens GN=SEP15 PE=1 SV=3	28144000	58856000	70889000	17543000	3127100	6539600	7876600	0	105320000	109770000	3	3	3	20.7	20.7	20.7	17.942	0.00018172	4.1261	157890000	3	5	1	2	1	1	2	1	1	2	1	5.5	15.2	7.9	0	2	1
170	A0A087X1K6;Q9Y2Y9	A0A087X1K6;Q9Y2Y9	Krueppel-like factor 13	KLF13	tr|A0A087X1K6|A0A087X1K6_HUMAN Krueppel-like factor 13 OS=Homo sapiens GN=KLF13 PE=4 SV=1;sp|Q9Y2Y9|KLF13_HUMAN Krueppel-like factor 13 OS=Homo sapiens GN=KLF13 PE=1 SV=1	15684000	0	0	746860	746860	0	0	14432000	0	0	1	1	1	5.9	5.9	5.9	31.225	0.0011442	2.2624	15684000	1	2	1	0	0	1	0	0	1	0	0	5.9	0	0	1	0	0
171	A0A087X1N3;O75818-2;O75818;F8WC38;X6RLL4	A0A087X1N3;O75818-2;O75818;F8WC38;X6RLL4	Ribonuclease P protein subunit p40	RPP40	tr|A0A087X1N3|A0A087X1N3_HUMAN Ribonuclease P 40kDa subunit, isoform CRA_c OS=Homo sapiens GN=RPP40 PE=4 SV=1;sp|O75818-2|RPP40_HUMAN Isoform 2 of Ribonuclease P protein subunit p40 OS=Homo sapiens GN=RPP40;sp|O75818|RPP40_HUMAN Ribonuclease P protein subu	242710000	46691000	80454000	20547000	13484000	2593900	4469700	101450000	80167000	184220000	5	5	5	27.4	27.4	27.4	36.783	0	38.317	369850000	13	5	4	3	4	4	3	4	4	3	4	20.9	16.2	21.8	5	5	3
172	A0A087X1S3	A0A087X1S3		HUWE1	tr|A0A087X1S3|A0A087X1S3_HUMAN E3 ubiquitin-protein ligase HUWE1 (Fragment) OS=Homo sapiens GN=HUWE1 PE=1 SV=1	34520000	0	0	3452000	3452000	0	0	24785000	0	0	3	1	1	15.2	3.9	3.9	23.944	0.006761	1.6147	34520000	0	1	2	0	2	1	0	0	1	0	0	9.1	0	11.3	0	0	0
173	A0A087X1U6;A0A075B730	A0A087X1U6;A0A075B730		EPPK1	tr|A0A087X1U6|A0A087X1U6_HUMAN Epiplakin OS=Homo sapiens GN=EPPK1 PE=1 SV=1;tr|A0A075B730|A0A075B730_HUMAN Epiplakin OS=Homo sapiens GN=EPPK1 PE=1 SV=2	12527000000	4047100000	9329200000	83023000	40150000	12972000	29901000	9271800000	9810700000	9950000000	108	101	8	61.6	54.3	2.8	555.65	0	323.31	25903000000	321	2	88	55	74	82	48	67	5	3	4	54.7	43.2	52.4	131	76	114
174	A0A087X1X7	A0A087X1X7		EEF1D	tr|A0A087X1X7|A0A087X1X7_HUMAN Elongation factor 1-delta OS=Homo sapiens GN=EEF1D PE=1 SV=1	0	0	19420000	524860	0	0	524860	0	0	16744000	10	1	1	21.6	1.4	1.4	69.282	1	-2	19420000	0	1	8	9	9	0	0	1	0	0	1	19.2	20.1	20.6	0	0	0
175	A0A087X1Z3;Q9UL46;H0YM70;H0YKU2;H0YLG1;H0YLD2	A0A087X1Z3;Q9UL46;H0YM70	Proteasome activator complex subunit 2	PSME2	tr|A0A087X1Z3|A0A087X1Z3_HUMAN Proteasome activator complex subunit 2 OS=Homo sapiens GN=PSME2 PE=1 SV=1;sp|Q9UL46|PSME2_HUMAN Proteasome activator complex subunit 2 OS=Homo sapiens GN=PSME2 PE=1 SV=4;tr|H0YM70|H0YM70_HUMAN Proteasome activator complex sub	3408900000	1168600000	2587000000	377080000	179420000	61503000	136160000	2882500000	2738100000	2636100000	13	13	13	54.7	54.7	54.7	29.126	0	156	7164500000	83	6	11	10	10	11	10	10	11	10	10	48.4	43.3	51.6	24	30	29
176	A0A087X239;Q6PCB5-2;Q6PCB5	A0A087X239;Q6PCB5-2;Q6PCB5	Round spermatid basic protein 1-like protein	RSBN1L	tr|A0A087X239|A0A087X239_HUMAN Round spermatid basic protein 1-like protein OS=Homo sapiens GN=RSBN1L PE=1 SV=1;sp|Q6PCB5-2|RSBNL_HUMAN Isoform 2 of Round spermatid basic protein 1-like protein OS=Homo sapiens GN=RSBN1L;sp|Q6PCB5|RSBNL_HUMAN Round spermati	42252000	0	0	938940	938940	0	0	28982000	0	0	2	2	2	3.8	3.8	3.8	94.611	0.00033744	2.7371	42252000	1	3	2	0	0	2	0	0	2	0	0	3.8	0	0	1	0	0
177	A0A087X256;Q2M389;Q2M389-2;F8W1W1;F8VNZ5;F8VYH7	A0A087X256;Q2M389;Q2M389-2	WASH complex subunit 7	KIAA1033	tr|A0A087X256|A0A087X256_HUMAN WASH complex subunit 7 OS=Homo sapiens GN=KIAA1033 PE=1 SV=1;sp|Q2M389|WASH7_HUMAN WASH complex subunit 7 OS=Homo sapiens GN=KIAA1033 PE=1 SV=2;sp|Q2M389-2|WASH7_HUMAN Isoform 2 of WASH complex subunit 7 OS=Homo sapiens GN=KI	120550000	20438000	113390000	3484600	1651400	279980	1553200	124560000	92666000	66374000	5	5	5	6.5	6.5	6.5	136.5	0	15.907	254380000	10	6	4	2	4	4	2	4	4	2	4	5.5	3.3	5.5	4	2	4
178	E9PDU5;A0A087X295;Q9NNW5;E9PBK6;Q6PKC6	E9PDU5;A0A087X295;Q9NNW5	WD repeat-containing protein 6	WDR6	tr|E9PDU5|E9PDU5_HUMAN WD repeat-containing protein 6 OS=Homo sapiens GN=WDR6 PE=4 SV=1;tr|A0A087X295|A0A087X295_HUMAN WD repeat-containing protein 6 OS=Homo sapiens GN=WDR6 PE=1 SV=1;sp|Q9NNW5|WDR6_HUMAN WD repeat-containing protein 6 OS=Homo sapiens GN=W	112600000	8779800	135440000	5035600	2207800	172150	2655600	101850000	24258000	124220000	7	7	7	10.9	10.9	10.9	116.17	0	16.85	256820000	11	5	4	1	5	4	1	5	4	1	5	7.1	1.1	8.1	4	1	6
179	A0A087X2D5;Q9BRJ2;A0A087WU62	A0A087X2D5;Q9BRJ2;A0A087WU62	39S ribosomal protein L45, mitochondrial	MRPL45	tr|A0A087X2D5|A0A087X2D5_HUMAN 39S ribosomal protein L45, mitochondrial OS=Homo sapiens GN=MRPL45 PE=1 SV=1;sp|Q9BRJ2|RM45_HUMAN 39S ribosomal protein L45, mitochondrial OS=Homo sapiens GN=MRPL45 PE=1 SV=2;tr|A0A087WU62|A0A087WU62_HUMAN 39S ribosomal prote	7261800000	1882100000	7943900000	776720000	330080000	85548000	361080000	5598700000	4347600000	6848700000	17	17	17	64.7	64.7	64.7	35.29	0	95.997	17088000000	106	3	17	11	14	17	11	14	17	11	14	64.7	44.8	57.8	35	27	44
180	A0A087X2D8;O60271-9;O60271-4;O60271-2;O60271;O60271-5;O60271-3;H0YBE9	A0A087X2D8;O60271-9;O60271-4;O60271-2;O60271;O60271-5;O60271-3	C-Jun-amino-terminal kinase-interacting protein 4	SPAG9	tr|A0A087X2D8|A0A087X2D8_HUMAN C-Jun-amino-terminal kinase-interacting protein 4 OS=Homo sapiens GN=SPAG9 PE=1 SV=1;sp|O60271-9|JIP4_HUMAN Isoform 6 of C-Jun-amino-terminal kinase-interacting protein 4 OS=Homo sapiens GN=SPAG9;sp|O60271-4|JIP4_HUMAN Isofor	251800000	33583000	102040000	5031400	3270100	436140	1325200	163330000	73898000	128560000	8	8	8	10.3	10.3	10.3	145.17	0	28.941	387420000	14	8	7	2	4	7	2	4	7	2	4	9.3	2.2	5	9	2	3
181	A0A087X2G1;F1T0B3;Q92499-3	A0A087X2G1;F1T0B3;Q92499-3	ATP-dependent RNA helicase DDX1	DDX1	tr|A0A087X2G1|A0A087X2G1_HUMAN ATP-dependent RNA helicase DDX1 OS=Homo sapiens GN=DDX1 PE=1 SV=1;tr|F1T0B3|F1T0B3_HUMAN ATP-dependent RNA helicase DDX1 OS=Homo sapiens GN=DDX1 PE=1 SV=1;sp|Q92499-3|DDX1_HUMAN Isoform 3 of ATP-dependent RNA helicase DDX1 OS	0	0	0	0	0	0	0	0	0	0	35	1	0	63.4	2.4	0	73.975	1	-2	0	0	3	27	14	27	0	0	0	0	0	0	51.7	28.5	54.5	0	0	0
182	A0A087X2H1;Q9ULT8;H0YJP0;G3V4V5;A0A087WVU6	A0A087X2H1;Q9ULT8;H0YJP0;G3V4V5	E3 ubiquitin-protein ligase HECTD1	HECTD1	tr|A0A087X2H1|A0A087X2H1_HUMAN E3 ubiquitin-protein ligase HECTD1 OS=Homo sapiens GN=HECTD1 PE=1 SV=1;sp|Q9ULT8|HECD1_HUMAN E3 ubiquitin-protein ligase HECTD1 OS=Homo sapiens GN=HECTD1 PE=1 SV=3;tr|H0YJP0|H0YJP0_HUMAN E3 ubiquitin-protein ligase HECTD1 (Fr	63518000	7031700	40837000	757730	432090	47835	277810	42036000	30672000	28730000	4	4	4	2.7	2.7	2.7	289.63	0	10.484	111390000	8	5	4	1	2	4	1	2	4	1	2	2.7	0.8	1.5	5	0	3
183	A0A087X2I1;P62333;H0YJC0;H0YJS8;H0YJX2;H0YJT1;H0YJE9	A0A087X2I1;P62333;H0YJC0	26S protease regulatory subunit 10B	PSMC6	tr|A0A087X2I1|A0A087X2I1_HUMAN 26S protease regulatory subunit 10B OS=Homo sapiens GN=PSMC6 PE=1 SV=1;sp|P62333|PRS10_HUMAN 26S protease regulatory subunit 10B OS=Homo sapiens GN=PSMC6 PE=1 SV=1;tr|H0YJC0|H0YJC0_HUMAN 26S protease regulatory subunit 10B (F	2156500000	758840000	2122400000	179920000	77017000	27101000	75801000	1934400000	1922300000	1561900000	19	19	19	58.3	58.3	58.3	45.796	0	71.848	5037700000	50	7	13	11	11	13	11	11	13	11	11	40.9	38	40	17	15	18
184	A0A088AWN2;Q8TBZ3-4;Q8TBZ3-5;Q8TBZ3-6;Q8TBZ3;Q8TBZ3-2;Q8TBZ3-7;H0YKE8;Q8TBZ3-8;Q8TBZ3-3	A0A088AWN2;Q8TBZ3-4;Q8TBZ3-5;Q8TBZ3-6;Q8TBZ3;Q8TBZ3-2;Q8TBZ3-7	WD repeat-containing protein 20	WDR20	tr|A0A088AWN2|A0A088AWN2_HUMAN WD repeat-containing protein 20 OS=Homo sapiens GN=WDR20 PE=4 SV=1;sp|Q8TBZ3-4|WDR20_HUMAN Isoform 4 of WD repeat-containing protein 20 OS=Homo sapiens GN=WDR20;sp|Q8TBZ3-5|WDR20_HUMAN Isoform 5 of WD repeat-containing protei	81392000	10128000	69949000	5045900	2543500	316500	2185900	45238000	42915000	62317000	4	4	4	8.7	8.7	8.7	67.475	0	8.099	161470000	9	10	3	1	3	3	1	3	3	1	3	6.2	2	6.4	4	1	4
185	A0A096LNH6;Q14185	A0A096LNH6;Q14185	Dedicator of cytokinesis protein 1	DOCK1	tr|A0A096LNH6|A0A096LNH6_HUMAN Dedicator of cytokinesis protein 1 OS=Homo sapiens GN=DOCK1 PE=4 SV=1;sp|Q14185|DOCK1_HUMAN Dedicator of cytokinesis protein 1 OS=Homo sapiens GN=DOCK1 PE=1 SV=2	14184000	0	24869000	322750	117220	0	205530	10136000	0	0	4	4	4	2.4	2.4	2.4	217.75	0.00018179	4.1278	39053000	4	2	2	0	2	2	0	2	2	0	2	1.3	0	1.2	2	0	2
186	A0A096LNU0;D6REY2;P23508;P23508-2	A0A096LNU0;D6REY2;P23508;P23508-2	Colorectal mutant cancer protein	MCC	tr|A0A096LNU0|A0A096LNU0_HUMAN Colorectal mutant cancer protein OS=Homo sapiens GN=MCC PE=4 SV=1;tr|D6REY2|D6REY2_HUMAN Colorectal mutant cancer protein OS=Homo sapiens GN=MCC PE=1 SV=1;sp|P23508|CRCM_HUMAN Colorectal mutant cancer protein OS=Homo sapiens	0	19619000	0	503050	0	503050	0	0	41212000	0	1	1	1	1.8	1.8	1.8	79.867	1	-2	19619000	1	4	0	1	0	0	1	0	0	1	0	0	1.8	0	0	1	0
187	A0A096LNU2;A0A096LP26;A0A096LP75;Q9NQA3;C4AMC7;Q6VEQ5;A8K0Z3	A0A096LNU2;A0A096LP26;A0A096LP75;Q9NQA3;C4AMC7;Q6VEQ5;A8K0Z3	WAS protein family homolog 6;Putative WAS protein family homolog 3;WAS protein family homolog 2;WAS protein family homolog 1	WASH6P;WASH3P;WASH2P;WASH1	tr|A0A096LNU2|A0A096LNU2_HUMAN Uncharacterized protein OS=Homo sapiens PE=4 SV=1;tr|A0A096LP26|A0A096LP26_HUMAN Uncharacterized protein OS=Homo sapiens PE=4 SV=1;tr|A0A096LP75|A0A096LP75_HUMAN Uncharacterized protein OS=Homo sapiens PE=4 SV=1;sp|Q9NQA3|WAS	12876000	0	0	804720	804720	0	0	9244500	0	0	1	1	1	5	5	5	39.227	0.0088744	1.4909	12876000	1	7	1	0	0	1	0	0	1	0	0	5	0	0	1	0	0
188	A0A096LNZ9;A0A096LPJ4;P05161	A0A096LNZ9;A0A096LPJ4;P05161	Ubiquitin-like protein ISG15	ISG15	tr|A0A096LNZ9|A0A096LNZ9_HUMAN Ubiquitin-like protein ISG15 (Fragment) OS=Homo sapiens GN=ISG15 PE=4 SV=1;tr|A0A096LPJ4|A0A096LPJ4_HUMAN Ubiquitin-like protein ISG15 OS=Homo sapiens GN=ISG15 PE=4 SV=1;sp|P05161|ISG15_HUMAN Ubiquitin-like protein ISG15 OS=H	507690000	8970500	169330000	62362000	46154000	815500	15393000	342350000	29021000	171880000	4	4	4	35.4	35.4	35.4	15.675	0	20.612	685990000	11	3	4	2	3	4	2	3	4	2	3	35.4	15.3	29.2	5	2	4
189	C9JFE4;A0A096LP07;A0A096LPJ3;A8K070;Q13098-5;Q13098;Q13098-7;Q13098-6;J3QS88;J3KTB0;J3QLT0;J3KSA5;J3KRJ4;J3QQX0;J3QS84;J3QLE8;J3QL53;J3KRE8	C9JFE4;A0A096LP07;A0A096LPJ3;A8K070;Q13098-5;Q13098;Q13098-7;Q13098-6	COP9 signalosome complex subunit 1	GPS1	tr|C9JFE4|C9JFE4_HUMAN COP9 signalosome complex subunit 1 OS=Homo sapiens GN=GPS1 PE=1 SV=2;tr|A0A096LP07|A0A096LP07_HUMAN COP9 signalosome complex subunit 1 OS=Homo sapiens GN=GPS1 PE=4 SV=1;tr|A0A096LPJ3|A0A096LPJ3_HUMAN COP9 signalosome complex subunit	202490000	76830000	70144000	13441000	7788100	2955000	2697800	151610000	186220000	0	9	9	9	27.8	27.8	27.8	53.371	0	16.888	349460000	12	18	4	4	5	4	4	5	4	4	5	10.2	9.6	17.6	3	4	5
190	A0A096LP25;A0A096LNZ0;Q6ZSR9	A0A096LP25;A0A096LNZ0;Q6ZSR9	Uncharacterized protein FLJ45252	AAK1	tr|A0A096LP25|A0A096LP25_HUMAN AP2-associated protein kinase 1 (Fragment) OS=Homo sapiens GN=AAK1 PE=4 SV=1;tr|A0A096LNZ0|A0A096LNZ0_HUMAN AP2-associated protein kinase 1 (Fragment) OS=Homo sapiens GN=AAK1 PE=4 SV=1;sp|Q6ZSR9|YJ005_HUMAN Uncharacterized pr	46518000	0	21865000	2849300	1938300	0	911040	22796000	0	30876000	2	2	2	6.3	6.3	6.3	54.448	0.00066258	2.4578	68384000	2	3	2	0	1	2	0	1	2	0	1	6.3	0	3.5	2	0	0
191	A0A096LP52;P61764;P61764-2	A0A096LP52;P61764;P61764-2	Syntaxin-binding protein 1	STXBP1	tr|A0A096LP52|A0A096LP52_HUMAN Syntaxin-binding protein 1 (Fragment) OS=Homo sapiens GN=STXBP1 PE=4 SV=1;sp|P61764|STXB1_HUMAN Syntaxin-binding protein 1 OS=Homo sapiens GN=STXBP1 PE=1 SV=1;sp|P61764-2|STXB1_HUMAN Isoform 2 of Syntaxin-binding protein 1 OS	5676800	0	0	567680	567680	0	0	4075900	0	0	1	1	1	10.9	10.9	10.9	13.567	0.00050134	2.6055	5676800	1	3	1	0	0	1	0	0	1	0	0	10.9	0	0	1	0	0
192	F8VZK7;A0A096LP63;Q8N4B1;Q8N4B1-4;F8W0V2;Q8N4B1-3	F8VZK7;A0A096LP63;Q8N4B1;Q8N4B1-4;F8W0V2;Q8N4B1-3	Sesquipedalian-1	FAM109A	tr|F8VZK7|F8VZK7_HUMAN Sesquipedalian-1 (Fragment) OS=Homo sapiens GN=FAM109A PE=4 SV=1;tr|A0A096LP63|A0A096LP63_HUMAN Sesquipedalian-1 OS=Homo sapiens GN=FAM109A PE=4 SV=1;sp|Q8N4B1|SESQ1_HUMAN Sesquipedalian-1 OS=Homo sapiens GN=FAM109A PE=1 SV=1;sp|Q8N4	18329000	0	90274000	18100000	3054800	0	15046000	40786000	0	45080000	2	2	2	40.2	40.2	40.2	13.227	0	5.0693	108600000	4	6	1	0	2	1	0	2	1	0	2	17.1	0	40.2	1	0	3
193	A0A096LPI6;A0A096LNH5;H7C2G3;A0A096LP73;A0A096LP12;A0A096LNJ1	A0A096LPI6;A0A096LNH5;H7C2G3		C21orf33	tr|A0A096LPI6|A0A096LPI6_HUMAN Uncharacterized protein OS=Homo sapiens PE=4 SV=1;tr|A0A096LNH5|A0A096LNH5_HUMAN Protein LOC102724023 OS=Homo sapiens GN=LOC102724023 PE=4 SV=1;tr|H7C2G3|H7C2G3_HUMAN ES1 protein homolog, mitochondrial (Fragment) OS=Homo sapi	9521400000	2169400000	7786200000	1217300000	595090000	135590000	486640000	7196600000	6561800000	6604700000	16	14	0	74.8	66.4	0	25.64	0	174.34	19477000000	86	6	15	12	14	14	10	13	0	0	0	71.8	67.2	67.6	35	17	34
194	A0AVI4;A0AVI4-2	A0AVI4;A0AVI4-2	E3 ubiquitin-protein ligase TM129	TMEM129	sp|A0AVI4|TM129_HUMAN E3 ubiquitin-protein ligase TM129 OS=Homo sapiens GN=TMEM129 PE=1 SV=1;sp|A0AVI4-2|TM129_HUMAN Isoform 2 of E3 ubiquitin-protein ligase TM129 OS=Homo sapiens GN=TMEM129	56225000	0	39113000	6355900	3748300	0	2607600	31600000	0	38142000	2	2	2	12.2	12.2	12.2	40.463	0	9.3832	95338000	4	2	2	0	1	2	0	1	2	0	1	12.2	0	5	3	0	1
195	A0AVT1;A0AVT1-2;H0Y8S8;A0AVT1-4;A0AVT1-3	A0AVT1;A0AVT1-2	Ubiquitin-like modifier-activating enzyme 6	UBA6	sp|A0AVT1|UBA6_HUMAN Ubiquitin-like modifier-activating enzyme 6 OS=Homo sapiens GN=UBA6 PE=1 SV=1;sp|A0AVT1-2|UBA6_HUMAN Isoform 2 of Ubiquitin-like modifier-activating enzyme 6 OS=Homo sapiens GN=UBA6	551340000	46452000	270880000	13573000	8614800	725810	4232500	415000000	115340000	301590000	17	17	17	23.2	23.2	23.2	117.97	0	38.398	868680000	30	5	15	3	10	15	3	10	15	3	10	21.2	3.8	12.7	15	4	11
196	A0FGR8-2;A0A087WXU3;A0FGR8;A0FGR8-4;A0FGR8-5	A0FGR8-2;A0A087WXU3;A0FGR8;A0FGR8-4	Extended synaptotagmin-2	ESYT2	sp|A0FGR8-2|ESYT2_HUMAN Isoform 2 of Extended synaptotagmin-2 OS=Homo sapiens GN=ESYT2;tr|A0A087WXU3|A0A087WXU3_HUMAN Extended synaptotagmin-2 OS=Homo sapiens GN=ESYT2 PE=1 SV=1;sp|A0FGR8|ESYT2_HUMAN Extended synaptotagmin-2 OS=Homo sapiens GN=ESYT2 PE=1 S	27173000	0	0	522550	522550	0	0	19300000	0	0	37	1	1	58.1	2	2	98.9	0.0022676	2.0817	27173000	1	5	28	26	28	1	0	0	1	0	0	46.2	41.9	49.2	1	0	0
197	A0JNW5-2;A0JNW5;F8W1I2;F8VW65;F8W665	A0JNW5-2;A0JNW5;F8W1I2;F8VW65;F8W665	UHRF1-binding protein 1-like	UHRF1BP1L	sp|A0JNW5-2|UH1BL_HUMAN Isoform 2 of UHRF1-binding protein 1-like OS=Homo sapiens GN=UHRF1BP1L;sp|A0JNW5|UH1BL_HUMAN UHRF1-binding protein 1-like OS=Homo sapiens GN=UHRF1BP1L PE=1 SV=2;tr|F8W1I2|F8W1I2_HUMAN UHRF1-binding protein 1-like (Fragment) OS=Homo	50376000	0	0	1439300	1439300	0	0	43157000	0	0	3	3	3	8.8	8.8	8.8	58.906	0.00034014	2.8373	50376000	2	5	3	0	0	3	0	0	3	0	0	8.8	0	0	2	0	0
198	A0MZ66;A0MZ66-3;A0MZ66-4;A0MZ66-5;A0MZ66-6;A0MZ66-8;A0MZ66-2;A0MZ66-7	A0MZ66;A0MZ66-3;A0MZ66-4;A0MZ66-5;A0MZ66-6;A0MZ66-8;A0MZ66-2	Shootin-1	KIAA1598	sp|A0MZ66|SHOT1_HUMAN Shootin-1 OS=Homo sapiens GN=KIAA1598 PE=1 SV=4;sp|A0MZ66-3|SHOT1_HUMAN Isoform 3 of Shootin-1 OS=Homo sapiens GN=KIAA1598;sp|A0MZ66-4|SHOT1_HUMAN Isoform 4 of Shootin-1 OS=Homo sapiens GN=KIAA1598;sp|A0MZ66-5|SHOT1_HUMAN Isoform 5 of	208790000	450790000	1354200000	46833000	4855600	10484000	31494000	372010000	1333000000	919580000	13	13	13	27.1	27.1	27.1	71.639	0	42.171	2013800000	17	8	7	6	4	7	6	4	7	6	4	17	10.5	8.9	7	5	5
199	A0PJW6;G5EA27;H0YCK4	A0PJW6	Transmembrane protein 223	TMEM223	sp|A0PJW6|TM223_HUMAN Transmembrane protein 223 OS=Homo sapiens GN=TMEM223 PE=1 SV=1	558070000	57818000	274110000	59333000	37205000	3854500	18274000	323420000	290890000	185410000	4	4	4	17.8	17.8	17.8	22.049	0	5.3289	889990000	15	3	4	2	1	4	2	1	4	2	1	17.8	7.9	5	8	5	2
200	A0PK00;H0YG77	A0PK00;H0YG77	Transmembrane protein 120B	TMEM120B	sp|A0PK00|T120B_HUMAN Transmembrane protein 120B OS=Homo sapiens GN=TMEM120B PE=2 SV=1;tr|H0YG77|H0YG77_HUMAN Transmembrane protein 120B (Fragment) OS=Homo sapiens GN=TMEM120B PE=4 SV=1	355200000	27909000	70613000	32409000	25371000	1993500	5043800	207280000	105980000	127770000	4	4	4	14.7	14.7	14.7	40.245	0	21.908	453720000	9	2	4	2	2	4	2	2	4	2	2	14.7	9.1	10	6	2	1
201	A1A4S6	A1A4S6	Rho GTPase-activating protein 10	ARHGAP10	sp|A1A4S6|RHG10_HUMAN Rho GTPase-activating protein 10 OS=Homo sapiens GN=ARHGAP10 PE=1 SV=1	12013000	0	0	222470	222470	0	0	9946300	0	0	1	1	1	2.2	2.2	2.2	89.374	0.00017743	3.581	12013000	1	1	1	0	0	1	0	0	1	0	0	2.2	0	0	1	0	0
202	A1BQX2;D6RA09;Q8N4S9-3;Q8N4S9	A1BQX2;D6RA09;Q8N4S9-3;Q8N4S9	MARVEL domain-containing protein 2	MARVELD2	tr|A1BQX2|A1BQX2_HUMAN MARVEL domain-containing protein 2 OS=Homo sapiens GN=MARVELD2 PE=1 SV=1;tr|D6RA09|D6RA09_HUMAN MARVEL domain-containing protein 2 (Fragment) OS=Homo sapiens GN=MARVELD2 PE=1 SV=1;sp|Q8N4S9-3|MALD2_HUMAN Isoform 3 of MARVEL domain-co	29008000	0	0	1000300	1000300	0	0	20603000	0	0	1	1	1	2.5	2.5	2.5	51.12	0.010005	1.3686	29008000	1	4	1	0	0	1	0	0	1	0	0	2.5	0	0	1	0	0
203	A1L0T0;M0R026;E9PJS0;M0QZX5;M0R1B5;E9PL44;E9PNL1	A1L0T0;M0R026	Acetolactate synthase-like protein	ILVBL	sp|A1L0T0|ILVBL_HUMAN Acetolactate synthase-like protein OS=Homo sapiens GN=ILVBL PE=1 SV=2;tr|M0R026|M0R026_HUMAN Acetolactate synthase-like protein OS=Homo sapiens GN=ILVBL PE=1 SV=1	14242000000	3776400000	12575000000	1019800000	474740000	125880000	419180000	11191000000	9698500000	10664000000	26	26	26	53.8	53.8	53.8	67.867	0	323.31	30594000000	208	7	25	19	24	25	19	24	25	19	24	52.5	43	53.8	68	63	77
204	A1L170;A1L170-2;F8W6W0;H7C2G1	A1L170;A1L170-2;F8W6W0	Uncharacterized protein C1orf226	C1orf226	sp|A1L170|CA226_HUMAN Uncharacterized protein C1orf226 OS=Homo sapiens GN=C1orf226 PE=1 SV=1;sp|A1L170-2|CA226_HUMAN Isoform 2 of Uncharacterized protein C1orf226 OS=Homo sapiens GN=C1orf226;tr|F8W6W0|F8W6W0_HUMAN Uncharacterized protein C1orf226 (Fragment	139000000	0	24896000	12608000	10692000	0	1915100	103700000	0	26395000	5	5	4	37.5	37.5	35.3	29.057	0	19.911	163900000	8	4	4	1	2	4	1	2	3	1	2	29.4	8.1	16.2	5	1	2
205	A1L188	A1L188	Uncharacterized protein C17orf89	C17orf89	sp|A1L188|CQ089_HUMAN Uncharacterized protein C17orf89 OS=Homo sapiens GN=C17orf89 PE=2 SV=1	280300000	23610000	98728000	67106000	46716000	3935000	16455000	148230000	107650000	145270000	2	2	2	32.4	32.4	32.4	7.7558	0	11.972	402640000	4	1	2	1	1	2	1	1	2	1	1	32.4	14.9	17.6	2	1	1
206	A2A2D0;P16949;P16949-2	A2A2D0;P16949;P16949-2	Stathmin	STMN1	tr|A2A2D0|A2A2D0_HUMAN Stathmin (Fragment) OS=Homo sapiens GN=STMN1 PE=1 SV=3;sp|P16949|STMN1_HUMAN Stathmin OS=Homo sapiens GN=STMN1 PE=1 SV=3;sp|P16949-2|STMN1_HUMAN Isoform 2 of Stathmin OS=Homo sapiens GN=STMN1	509200000	406550000	479570000	232550000	84866000	67759000	79929000	678230000	630680000	674410000	3	3	3	31.4	31.4	31.4	9.8642	0	10.607	1395300000	14	3	2	3	2	2	3	2	2	3	2	31.4	31.4	31.4	4	5	5
207	A2A2G4;Q9Y672;S4R350	A2A2G4;Q9Y672;S4R350	Dolichyl pyrophosphate Man9GlcNAc2 alpha-1,3-glucosyltransferase	ALG6	tr|A2A2G4|A2A2G4_HUMAN Dolichyl pyrophosphate Man9GlcNAc2 alpha-1,3-glucosyltransferase OS=Homo sapiens GN=ALG6 PE=4 SV=1;sp|Q9Y672|ALG6_HUMAN Dolichyl pyrophosphate Man9GlcNAc2 alpha-1,3-glucosyltransferase OS=Homo sapiens GN=ALG6 PE=1 SV=1;tr|S4R350|S4R3	577110000	216800000	465820000	57260000	26232000	9854500	21174000	627800000	300920000	522290000	7	7	7	12.6	12.6	12.6	58.347	0	16.373	1259700000	18	3	5	4	4	5	4	4	5	4	4	8.4	7.3	7.9	6	6	6
208	H0Y669;A2A2N5;Q9NTW7-3;Q9NTW7-2;Q9NPA5-2;Q9NTW7;Q9NTW7-4;Q9NPA5	H0Y669;A2A2N5;Q9NTW7-3;Q9NTW7-2;Q9NPA5-2;Q9NTW7;Q9NTW7-4;Q9NPA5	Zinc finger protein 64 homolog, isoforms 3 and 4;Zinc finger protein 64 homolog, isoforms 1 and 2	ZFP64	tr|H0Y669|H0Y669_HUMAN Zinc finger protein 64 homolog, isoforms 1 and 2 (Fragment) OS=Homo sapiens GN=ZFP64 PE=4 SV=1;tr|A2A2N5|A2A2N5_HUMAN Zinc finger protein 64 homolog, isoforms 1 and 2 (Fragment) OS=Homo sapiens GN=ZFP64 PE=4 SV=1;sp|Q9NTW7-3|ZF64B_HU	23533000	0	0	2139400	2139400	0	0	15220000	0	0	1	1	1	8.3	8.3	8.3	13.748	0.010011	1.3741	23533000	1	8	1	0	0	1	0	0	1	0	0	8.3	0	0	1	0	0
209	A2A2V1;P04156-2;P04156;X6RKS3	A2A2V1;P04156-2;P04156;X6RKS3	Major prion protein	PRNP	tr|A2A2V1|A2A2V1_HUMAN Major prion protein (Fragment) OS=Homo sapiens GN=PRNP PE=3 SV=1;sp|P04156-2|PRIO_HUMAN Isoform 2 of Major prion protein OS=Homo sapiens GN=PRNP;sp|P04156|PRIO_HUMAN Major prion protein OS=Homo sapiens GN=PRNP PE=1 SV=1;tr|X6RKS3|X6R	1706000000	993600000	1599000000	358220000	142170000	82800000	133250000	1671700000	2070900000	1468400000	5	5	5	20.1	20.1	20.1	27.278	0	52.84	4298600000	38	4	3	4	4	3	4	4	3	4	4	12.9	16.9	16.1	11	10	17
210	A2A2Y4-3;A2A2Y4-5;A2A2Y4-2;A2A2Y4;A2A2Y4-4	A2A2Y4-3;A2A2Y4-5;A2A2Y4-2;A2A2Y4;A2A2Y4-4	FERM domain-containing protein 3	FRMD3	sp|A2A2Y4-3|FRMD3_HUMAN Isoform 3 of FERM domain-containing protein 3 OS=Homo sapiens GN=FRMD3;sp|A2A2Y4-5|FRMD3_HUMAN Isoform 5 of FERM domain-containing protein 3 OS=Homo sapiens GN=FRMD3;sp|A2A2Y4-2|FRMD3_HUMAN Isoform 2 of FERM domain-containing protei	15891000	0	0	882810	882810	0	0	10546000	0	0	2	2	2	13	13	13	40.684	0.00034048	2.8512	15891000	2	5	2	0	0	2	0	0	2	0	0	13	0	0	2	0	0
211	A2A376;O95786-2;O95786	A2A376;O95786-2;O95786	Probable ATP-dependent RNA helicase DDX58	DDX58	tr|A2A376|A2A376_HUMAN Probable ATP-dependent RNA helicase DDX58 OS=Homo sapiens GN=DDX58 PE=1 SV=1;sp|O95786-2|DDX58_HUMAN Isoform 2 of Probable ATP-dependent RNA helicase DDX58 OS=Homo sapiens GN=DDX58;sp|O95786|DDX58_HUMAN Probable ATP-dependent RNA hel	0	0	8730600	198420	0	0	198420	0	0	7194400	1	1	1	1.7	1.7	1.7	82.612	0.0094267	1.4199	8730600	1	3	0	0	1	0	0	1	0	0	1	0	0	1.7	0	0	1
212	A2A3N6;O60331-4;O60331;O60331-2;O60331-3	A2A3N6	Putative PIP5K1A and PSMD4-like protein	PIPSL	sp|A2A3N6|PIPSL_HUMAN Putative PIP5K1A and PSMD4-like protein OS=Homo sapiens GN=PIPSL PE=5 SV=1	39871000	30497000	71313000	3829200	1077600	824250	1927400	61619000	67419000	63024000	7	5	0	8.7	6.5	0	95.047	0	5.6866	141680000	9	5	4	4	4	2	2	3	0	0	0	4.2	4.8	5.8	2	4	3
213	A2AEA2;P10321;F8W9Z8	A2AEA2;P10321	HLA class I histocompatibility antigen, Cw-7 alpha chain	HLA-C	tr|A2AEA2|A2AEA2_HUMAN HLA class I histocompatibility antigen, Cw-14 alpha chain OS=Homo sapiens GN=HLA-C PE=3 SV=2;sp|P10321|1C07_HUMAN HLA class I histocompatibility antigen, Cw-7 alpha chain OS=Homo sapiens GN=HLA-C PE=1 SV=3	20052000	0	0	954840	954840	0	0	14242000	0	0	11	1	0	39.5	4.3	0	41.301	0.0059956	1.6592	20052000	1	3	10	9	9	1	0	0	0	0	0	35.8	31.5	32.3	1	0	0
214	H7BXX2;A2AJT9-3;A2AJT9-2;A2AJT9	H7BXX2;A2AJT9-3;A2AJT9-2;A2AJT9	Uncharacterized protein CXorf23	CXorf23	tr|H7BXX2|H7BXX2_HUMAN Uncharacterized protein CXorf23 (Fragment) OS=Homo sapiens GN=CXorf23 PE=4 SV=1;sp|A2AJT9-3|CX023_HUMAN Isoform 3 of Uncharacterized protein CXorf23 OS=Homo sapiens GN=CXorf23;sp|A2AJT9-2|CX023_HUMAN Isoform 2 of Uncharacterized prot	0	0	0	0	0	0	0	0	0	0	1	1	1	5.1	5.1	5.1	26.631	0.008267	1.5164	0	1	4	1	0	0	1	0	0	1	0	0	5.1	0	0	1	0	0
215	K7EMB8;A2RRE0;Q9Y4E6-2;Q9Y4E6	K7EMB8;A2RRE0;Q9Y4E6-2;Q9Y4E6	WD repeat-containing protein 7	WDR7	tr|K7EMB8|K7EMB8_HUMAN WD repeat-containing protein 7 (Fragment) OS=Homo sapiens GN=WDR7 PE=4 SV=1;tr|A2RRE0|A2RRE0_HUMAN WD repeat-containing protein 7 OS=Homo sapiens GN=WDR7 PE=1 SV=1;sp|Q9Y4E6-2|WDR7_HUMAN Isoform 2 of WD repeat-containing protein 7 OS	3408700	0	0	426090	426090	0	0	1960900	0	0	1	1	1	8.3	8.3	8.3	18.406	0.0066111	1.6298	3408700	1	4	1	0	0	1	0	0	1	0	0	8.3	0	0	1	0	0
216	A2RRP1;A2RRP1-2;H0Y5G7;C9JCM7;H7C007;H7BZR3;H7BZU5;H7C1Y9;H7C1U4	A2RRP1;A2RRP1-2;H0Y5G7	Neuroblastoma-amplified sequence	NBAS	sp|A2RRP1|NBAS_HUMAN Neuroblastoma-amplified sequence OS=Homo sapiens GN=NBAS PE=1 SV=2;sp|A2RRP1-2|NBAS_HUMAN Isoform 2 of Neuroblastoma-amplified sequence OS=Homo sapiens GN=NBAS;tr|H0Y5G7|H0Y5G7_HUMAN Neuroblastoma-amplified sequence (Fragment) OS=Homo	6686200000	2197500000	5215800000	106810000	50653000	16648000	39513000	5458400000	5391000000	5061000000	78	78	77	45	45	44.8	268.57	0	323.31	14099000000	244	9	64	49	53	64	49	53	64	49	52	38.6	27.8	32.6	92	62	90
217	A2RTX5-2;A2RTX5;B7ZLP8	A2RTX5-2;A2RTX5;B7ZLP8	Probable threonine--tRNA ligase 2, cytoplasmic	TARSL2	sp|A2RTX5-2|SYTC2_HUMAN Isoform 2 of Probable threonine--tRNA ligase 2, cytoplasmic OS=Homo sapiens GN=TARSL2;sp|A2RTX5|SYTC2_HUMAN Probable threonine--tRNA ligase 2, cytoplasmic OS=Homo sapiens GN=TARSL2 PE=1 SV=1;tr|B7ZLP8|B7ZLP8_HUMAN Probable threonine	20535000	0	8937700	627070	436910	0	190160	11813000	0	7706200	4	2	2	8.3	5	5	81.56	0	4.3984	29472000	3	3	1	0	4	1	0	2	1	0	2	3.1	0	8.3	1	0	2
218	F8WA11;Q7Z460-2;Q7Z460-4;A2RU21;Q7Z460-3;Q7Z460;H0Y5T1;C9JP76;C9J151;H7C4I5;H7C5M8	F8WA11;Q7Z460-2;Q7Z460-4;A2RU21;Q7Z460-3;Q7Z460	CLIP-associating protein 1	CLASP1	tr|F8WA11|F8WA11_HUMAN CLIP-associating protein 1 OS=Homo sapiens GN=CLASP1 PE=1 SV=2;sp|Q7Z460-2|CLAP1_HUMAN Isoform 2 of CLIP-associating protein 1 OS=Homo sapiens GN=CLASP1;sp|Q7Z460-4|CLAP1_HUMAN Isoform 4 of CLIP-associating protein 1 OS=Homo sapiens	951170000	272190000	730880000	19542000	9511700	2721900	7308800	730850000	850820000	638800000	23	23	18	20.2	20.2	16.4	162.76	0	70.054	1954200000	37	11	14	7	14	14	7	14	10	4	12	12.9	6.5	13.3	16	9	12
219	A2RU67;Q69YM1	A2RU67	Uncharacterized protein KIAA1467	KIAA1467	sp|A2RU67|K1467_HUMAN Uncharacterized protein KIAA1467 OS=Homo sapiens GN=KIAA1467 PE=1 SV=1	320060000	51572000	205090000	19887000	11036000	1778300	7071900	239130000	215290000	217280000	5	5	5	14	14	14	67.038	0	18.462	576710000	10	2	5	2	4	5	2	4	5	2	4	14	6.4	11.9	5	2	3
220	B7ZM87;A2RUF3;O75044;A0A075B7B5;Q5VZB4;P0DMP2;P0DJJ0;G5EA48;Q7Z6B7-2;Q7Z6B7;A0A075B7C8;A0A075B743;A0A075B7E6;E9PDX4;A0A087X0L1;A0A087WW56	B7ZM87;A2RUF3;O75044;A0A075B7B5;Q5VZB4;P0DMP2;P0DJJ0	SLIT-ROBO Rho GTPase-activating protein 2;SLIT-ROBO Rho GTPase-activating protein 2B;SLIT-ROBO Rho GTPase-activating protein 2C	SRGAP2;SRGAP2B;SRGAP2C	tr|B7ZM87|B7ZM87_HUMAN SLIT-ROBO Rho GTPase-activating protein 2 OS=Homo sapiens GN=SRGAP2 PE=2 SV=1;tr|A2RUF3|A2RUF3_HUMAN SLIT-ROBO Rho GTPase activating protein 2 OS=Homo sapiens GN=SRGAP2 PE=1 SV=1;sp|O75044|SRGP2_HUMAN SLIT-ROBO Rho GTPase-activating	28332000	20578000	52526000	1748900	488490	354800	905630	0	0	50083000	6	6	6	8.7	8.7	8.7	120.74	0	7.8246	101440000	5	16	2	2	3	2	2	3	2	2	3	3.2	2.2	4.4	2	1	2
221	A3KMH1-3;A3KMH1;A3KMH1-2	A3KMH1-3;A3KMH1;A3KMH1-2	von Willebrand factor A domain-containing protein 8	VWA8	sp|A3KMH1-3|VWA8_HUMAN Isoform 3 of von Willebrand factor A domain-containing protein 8 OS=Homo sapiens GN=VWA8;sp|A3KMH1|VWA8_HUMAN von Willebrand factor A domain-containing protein 8 OS=Homo sapiens GN=VWA8 PE=1 SV=2;sp|A3KMH1-2|VWA8_HUMAN Isoform 2 of v	7511000000	1723700000	5856000000	120730000	60088000	13790000	46848000	5568600000	5306600000	5044000000	74	74	74	48.5	48.5	48.5	210.92	0	323.31	15091000000	200	3	61	33	47	61	33	47	61	33	47	41.5	24	31.9	92	39	69
222	A4D1E9;A4D1E9-2;C9J8R7;C9JNI1;C9JEQ8;F8WBY0;F8WCN4;F8WBB5;A4D1E9-3	A4D1E9;A4D1E9-2;C9J8R7;C9JNI1;C9JEQ8	GTP-binding protein 10	GTPBP10	sp|A4D1E9|GTPBA_HUMAN GTP-binding protein 10 OS=Homo sapiens GN=GTPBP10 PE=1 SV=1;sp|A4D1E9-2|GTPBA_HUMAN Isoform 2 of GTP-binding protein 10 OS=Homo sapiens GN=GTPBP10;tr|C9J8R7|C9J8R7_HUMAN GTP-binding protein 10 (Fragment) OS=Homo sapiens GN=GTPBP10 PE=	2497800000	793200000	2023700000	183260000	86130000	27352000	69782000	2163400000	1517800000	2021800000	14	14	14	48.6	48.6	48.6	42.932	0	113.06	5314700000	58	9	14	11	12	14	11	12	14	11	12	48.6	38.2	45	24	12	22
223	C9J7X6;A4D1U4	C9J7X6;A4D1U4	Protein LCHN	KIAA1147;LCHN	tr|C9J7X6|C9J7X6_HUMAN Protein LCHN OS=Homo sapiens GN=KIAA1147 PE=4 SV=1;sp|A4D1U4|LCHN_HUMAN Protein LCHN OS=Homo sapiens GN=LCHN PE=2 SV=1	15635000	0	0	744530	744530	0	0	11105000	0	0	1	1	1	4	4	4	40.532	0.0016279	2.1768	15635000	1	2	1	0	0	1	0	0	1	0	0	4	0	0	1	0	0
224	A4GXA9-2	A4GXA9-2			sp|A4GXA9-2|EME2_HUMAN Isoform 2 of Probable crossover junction endonuclease EME2 OS=Homo sapiens GN=EME2	94539000	50595000	60141000	14662000	6752800	3613900	4295800	61308000	152490000	47500000	1	1	1	5.3	5.3	5.3	26.446	0.00033944	2.8114	205270000	3	1	1	1	1	1	1	1	1	1	1	5.3	5.3	5.3	1	1	1
225	F5H4Q5;A5D8V6	F5H4Q5;A5D8V6	Vacuolar protein sorting-associated protein 37C	VPS37C	tr|F5H4Q5|F5H4Q5_HUMAN Vacuolar protein sorting-associated protein 37C (Fragment) OS=Homo sapiens GN=VPS37C PE=1 SV=1;sp|A5D8V6|VP37C_HUMAN Vacuolar protein sorting-associated protein 37C OS=Homo sapiens GN=VPS37C PE=1 SV=2	1760600	0	10928000	1812600	251510	0	1561100	0	0	11489000	1	1	1	12.8	12.8	12.8	17.143	0.0092908	1.437	12688000	2	2	1	0	1	1	0	1	1	0	1	12.8	0	12.8	1	0	1
226	A5PLL3;Q92794;C9K0F9	A5PLL3;Q92794	Histone acetyltransferase;Histone acetyltransferase KAT6A	MYST3;KAT6A	tr|A5PLL3|A5PLL3_HUMAN Histone acetyltransferase OS=Homo sapiens GN=MYST3 PE=1 SV=1;sp|Q92794|KAT6A_HUMAN Histone acetyltransferase KAT6A OS=Homo sapiens GN=KAT6A PE=1 SV=2	39127000	0	39690000	1407400	698690	0	708750	37264000	0	41871000	5	5	4	9.4	9.4	8.3	93.236	0	8.5764	78817000	7	3	2	0	5	2	0	5	2	0	4	3.9	0	9.4	2	0	5
227	Q5TGE2;A5PLL7-2;A5PLL7	Q5TGE2;A5PLL7-2;A5PLL7	Transmembrane protein 189	TMEM189	tr|Q5TGE2|Q5TGE2_HUMAN HCG2044780, isoform CRA_b OS=Homo sapiens GN=TMEM189 PE=1 SV=1;sp|A5PLL7-2|TM189_HUMAN Isoform 2 of Transmembrane protein 189 OS=Homo sapiens GN=TMEM189;sp|A5PLL7|TM189_HUMAN Transmembrane protein 189 OS=Homo sapiens GN=TMEM189 PE=1	183310000	0	198860000	63696000	30552000	0	33144000	217760000	0	172680000	5	1	1	37.9	7.7	7.7	22.883	0	5.406	382180000	3	3	4	0	2	1	0	1	1	0	1	30.8	0	14.9	1	0	2
228	A5YKK6-2;A5YKK6;A5YKK6-3;A5YKK6-4;H3BMZ2;H3BVC9;B5MDN3;H3BNB1;H3BR89	A5YKK6-2;A5YKK6;A5YKK6-3	CCR4-NOT transcription complex subunit 1	CNOT1	sp|A5YKK6-2|CNOT1_HUMAN Isoform 2 of CCR4-NOT transcription complex subunit 1 OS=Homo sapiens GN=CNOT1;sp|A5YKK6|CNOT1_HUMAN CCR4-NOT transcription complex subunit 1 OS=Homo sapiens GN=CNOT1 PE=1 SV=2;sp|A5YKK6-3|CNOT1_HUMAN Isoform 3 of CCR4-NOT transcrip	382570000	66316000	372000000	6080600	2833800	491230	2755500	412660000	170050000	261670000	17	17	17	8.8	8.8	8.8	266.38	0	31.175	820880000	24	9	11	4	10	11	4	10	11	4	10	5.3	2.2	5.1	11	2	11
229	A6NCC9;E9PME3;C9JHT9;C9JJV1;Q9Y5U2-2;Q9Y5U2;E9PL88;C9JDU0	A6NCC9;E9PME3;C9JHT9;C9JJV1;Q9Y5U2-2;Q9Y5U2;E9PL88;C9JDU0	Protein TSSC4	TSSC4	tr|A6NCC9|A6NCC9_HUMAN Protein TSSC4 OS=Homo sapiens GN=TSSC4 PE=1 SV=1;tr|E9PME3|E9PME3_HUMAN Protein TSSC4 (Fragment) OS=Homo sapiens GN=TSSC4 PE=1 SV=1;tr|C9JHT9|C9JHT9_HUMAN Protein TSSC4 (Fragment) OS=Homo sapiens GN=TSSC4 PE=1 SV=1;tr|C9JJV1|C9JJV1_H	119020000	0	56805000	17583000	11902000	0	5680500	83177000	0	77066000	3	3	3	26	26	26	13.847	0.00017643	3.4837	175830000	3	8	3	0	1	3	0	1	3	0	1	26	0	10.2	3	0	0
230	H3BTL1;Q9GZQ8;A6NCE7;Q9H492;Q9H492-2	H3BTL1;Q9GZQ8;A6NCE7;Q9H492;Q9H492-2	Microtubule-associated proteins 1A/1B light chain 3B;Microtubule-associated proteins 1A/1B light chain 3 beta 2;Microtubule-associated proteins 1A/1B light chain 3A	MAP1LC3B;MAP1LC3B2;MAP1LC3A	tr|H3BTL1|H3BTL1_HUMAN Microtubule-associated protein 1 light chain 3 beta, isoform CRA_f OS=Homo sapiens GN=MAP1LC3B PE=3 SV=1;sp|Q9GZQ8|MLP3B_HUMAN Microtubule-associated proteins 1A/1B light chain 3B OS=Homo sapiens GN=MAP1LC3B PE=1 SV=3;sp|A6NCE7|MP3B2	243240000	28578000	229790000	100320000	48648000	5715500	45957000	241980000	91652000	163880000	2	2	2	28	28	28	9.0115	0	4.5354	501600000	9	5	2	2	2	2	2	2	2	2	2	28	28	28	3	2	4
231	A6NCS6	A6NCS6	Uncharacterized protein C2orf72	C2orf72	sp|A6NCS6|CB072_HUMAN Uncharacterized protein C2orf72 OS=Homo sapiens GN=C2orf72 PE=2 SV=2	4044000000	1470000000	4541100000	628450000	252750000	91876000	283820000	3774600000	3862200000	3529500000	14	14	14	61.4	61.4	61.4	30.48	0	188.97	10055000000	96	1	10	12	12	10	12	12	10	12	12	50.2	61	54.6	33	31	32
232	K7EKG0;A6ND36-2;A6ND36	K7EKG0;A6ND36-2;A6ND36	Protein FAM83G	FAM83G	tr|K7EKG0|K7EKG0_HUMAN Protein FAM83G (Fragment) OS=Homo sapiens GN=FAM83G PE=1 SV=1;sp|A6ND36-2|FA83G_HUMAN Isoform 2 of Protein FAM83G OS=Homo sapiens GN=FAM83G;sp|A6ND36|FA83G_HUMAN Protein FAM83G OS=Homo sapiens GN=FAM83G PE=1 SV=2	13049000	0	24443000	4165800	1449900	0	2715900	10804000	0	26823000	1	1	1	11.3	11.3	11.3	15.422	0.0025848	2.0409	37492000	3	3	1	0	1	1	0	1	1	0	1	11.3	0	11.3	1	0	2
233	A6NDB9;K7EKN5	A6NDB9	Paralemmin-3	PALM3	sp|A6NDB9|PALM3_HUMAN Paralemmin-3 OS=Homo sapiens GN=PALM3 PE=1 SV=2	34843000	35191000	48064000	3107800	916920	926080	1264800	34727000	75707000	56987000	5	5	5	10.7	10.7	10.7	71.695	0	7.2773	118100000	6	2	3	3	3	3	3	3	3	3	3	6.2	6.2	6.2	1	3	2
234	A6NDG6;H3BV17	A6NDG6	Phosphoglycolate phosphatase	PGP	sp|A6NDG6|PGP_HUMAN Phosphoglycolate phosphatase OS=Homo sapiens GN=PGP PE=1 SV=1	50322000	19528000	74596000	7602400	2648500	1027800	3926100	37381000	67675000	50232000	5	5	5	19.9	19.9	19.9	34.006	0	9.4211	144450000	8	2	2	1	4	2	1	4	2	1	4	9.7	3.1	15	2	1	5
235	H7C231;H7BZ37;H7C2V9;A6NE70;Q6W2J9-4;Q6W2J9-2;Q6W2J9	H7C231;H7BZ37;H7C2V9;A6NE70;Q6W2J9-4;Q6W2J9-2;Q6W2J9	BCL-6 corepressor	BCOR	tr|H7C231|H7C231_HUMAN BCL-6 corepressor (Fragment) OS=Homo sapiens GN=BCOR PE=1 SV=1;tr|H7BZ37|H7BZ37_HUMAN BCL-6 corepressor (Fragment) OS=Homo sapiens GN=BCOR PE=1 SV=1;tr|H7C2V9|H7C2V9_HUMAN BCL-6 corepressor (Fragment) OS=Homo sapiens GN=BCOR PE=1 SV=	29300000	0	6992600	2134900	1723500	0	411330	16282000	0	14212000	2	2	2	14.9	14.9	14.9	32.43	0.00017986	3.8962	36293000	3	7	2	0	1	2	0	1	2	0	1	14.9	0	9	2	0	1
236	G3V2I3;A6NED2	G3V2I3;A6NED2	RCC1 domain-containing protein 1	RCCD1	tr|G3V2I3|G3V2I3_HUMAN RCC1 domain-containing protein 1 OS=Homo sapiens GN=RCCD1 PE=1 SV=1;sp|A6NED2|RCCD1_HUMAN RCC1 domain-containing protein 1 OS=Homo sapiens GN=RCCD1 PE=1 SV=1	6457100	0	0	307480	307480	0	0	5346100	0	0	1	1	1	5.1	5.1	5.1	39.906	0.00034008	2.8359	6457100	1	2	1	0	0	1	0	0	1	0	0	5.1	0	0	1	0	0
237	A6NFX8;Q9UKK9;A6NJU6;A6NCQ0;H0YEY4;C9JYY9	A6NFX8;Q9UKK9;A6NJU6	ADP-sugar pyrophosphatase	NUDT5	tr|A6NFX8|A6NFX8_HUMAN ADP-sugar pyrophosphatase OS=Homo sapiens GN=NUDT5 PE=1 SV=1;sp|Q9UKK9|NUDT5_HUMAN ADP-sugar pyrophosphatase OS=Homo sapiens GN=NUDT5 PE=1 SV=1;tr|A6NJU6|A6NJU6_HUMAN ADP-sugar pyrophosphatase OS=Homo sapiens GN=NUDT5 PE=1 SV=2	1579500000	346990000	967900000	206740000	112820000	24785000	69136000	879760000	966140000	827960000	12	12	12	55.6	55.6	55.6	25.895	0	70.873	2894400000	37	6	10	8	10	10	8	10	10	8	10	50.9	50.4	53	15	9	13
238	K7EIJ0;K7ENL2;A6NG10;K7EMC9;Q969T9;K7EIN1;K7ESN4;K7EIK1;B4DFG2	K7EIJ0;K7ENL2;A6NG10;K7EMC9;Q969T9;K7EIN1;K7ESN4;K7EIK1;B4DFG2	WW domain-binding protein 2	WBP2	tr|K7EIJ0|K7EIJ0_HUMAN WW domain-binding protein 2 (Fragment) OS=Homo sapiens GN=WBP2 PE=1 SV=1;tr|K7ENL2|K7ENL2_HUMAN WW domain-binding protein 2 OS=Homo sapiens GN=WBP2 PE=1 SV=1;tr|A6NG10|A6NG10_HUMAN WW domain-binding protein 2 OS=Homo sapiens GN=WBP2	0	8439100	82244000	10076000	0	937680	9138200	0	0	78477000	2	2	2	12	12	12	18.224	0.00034554	3.0692	90683000	2	9	0	1	1	0	1	1	0	1	1	0	6	6	0	1	1
239	A6NGW2;Q7RTU9	A6NGW2;Q7RTU9	Putative stereocilin-like protein;Stereocilin	STRCP1;STRC	sp|A6NGW2|STRCL_HUMAN Putative stereocilin-like protein OS=Homo sapiens GN=STRCP1 PE=5 SV=1;sp|Q7RTU9|STRC_HUMAN Stereocilin OS=Homo sapiens GN=STRC PE=2 SV=1	128720000	111190000	256940000	7763400	2011300	1737400	4014700	296290000	197570000	182350000	1	1	1	0.7	0.7	0.7	192.43	0.0091558	1.4576	496860000	4	2	1	1	1	1	1	1	1	1	1	0.7	0.7	0.7	1	1	2
240	A6NH11	A6NH11	Glycolipid transfer protein domain-containing protein 2	GLTPD2	sp|A6NH11|GLTD2_HUMAN Glycolipid transfer protein domain-containing protein 2 OS=Homo sapiens GN=GLTPD2 PE=1 SV=2	667170000	226840000	520140000	67340000	31770000	10802000	24768000	472760000	596400000	495320000	10	10	10	37.1	37.1	37.1	31.641	0	35.094	1414100000	25	1	7	5	8	7	5	8	7	5	8	23	20.3	33.3	10	7	8
241	A6NHB5;Q14202-2;Q14202;A6NHN7;A6NL54;Q14202-3;A6NC58	A6NHB5;Q14202-2;Q14202;A6NHN7	Zinc finger MYM-type protein 3	ZMYM3	tr|A6NHB5|A6NHB5_HUMAN Zinc finger MYM-type protein 3 OS=Homo sapiens GN=ZMYM3 PE=1 SV=1;sp|Q14202-2|ZMYM3_HUMAN Isoform 2 of Zinc finger MYM-type protein 3 OS=Homo sapiens GN=ZMYM3;sp|Q14202|ZMYM3_HUMAN Zinc finger MYM-type protein 3 OS=Homo sapiens GN=ZM	1323200000	297560000	722640000	32547000	18378000	4132800	10037000	913610000	740940000	931080000	25	25	25	27.9	27.9	27.9	152.6	0	108.16	2343400000	53	7	22	11	15	22	11	15	22	11	15	24.8	10.9	18.4	23	11	19
242	A6NHL2-2;A6NHL2	A6NHL2-2;A6NHL2	Tubulin alpha chain-like 3	TUBAL3	sp|A6NHL2-2|TBAL3_HUMAN Isoform 2 of Tubulin alpha chain-like 3 OS=Homo sapiens GN=TUBAL3;sp|A6NHL2|TBAL3_HUMAN Tubulin alpha chain-like 3 OS=Homo sapiens GN=TUBAL3 PE=1 SV=2	133480000	14570000	98013000	9113400	4943700	539640	3630100	85547000	49329000	105230000	4	1	1	9.1	4.2	4.2	45.517	0	11.541	246060000	5	2	4	4	4	1	1	1	1	1	1	9.1	9.1	9.1	3	1	1
243	A6NHQ2;R4GMW7	A6NHQ2;R4GMW7	rRNA/tRNA 2-O-methyltransferase fibrillarin-like protein 1	FBLL1	sp|A6NHQ2|FBLL1_HUMAN rRNA/tRNA 2-O-methyltransferase fibrillarin-like protein 1 OS=Homo sapiens GN=FBLL1 PE=3 SV=1;tr|R4GMW7|R4GMW7_HUMAN rRNA/tRNA 2-O-methyltransferase fibrillarin-like protein 1 OS=Homo sapiens GN=FBLL1 PE=1 SV=1	5319500000	3022700000	5473500000	575650000	221650000	125950000	228060000	3884300000	6518100000	4201000000	4	2	2	11.4	3.6	3.6	34.675	0	7.3833	13816000000	42	2	3	4	4	1	2	2	1	2	2	11.1	11.4	11.4	13	18	11
244	A6NHR9;A6NHR9-2;J3KTL8;A6NHR9-3;J3QSH1;J3KRK8	A6NHR9;A6NHR9-2;J3KTL8	Structural maintenance of chromosomes flexible hinge domain-containing protein 1	SMCHD1	sp|A6NHR9|SMHD1_HUMAN Structural maintenance of chromosomes flexible hinge domain-containing protein 1 OS=Homo sapiens GN=SMCHD1 PE=1 SV=2;sp|A6NHR9-2|SMHD1_HUMAN Isoform 2 of Structural maintenance of chromosomes flexible hinge domain-containing protein 1	4847100000	2753600000	3968300000	91095000	38166000	21682000	31246000	5166200000	5453600000	4657500000	60	60	60	37.2	37.2	37.2	226.37	0	280.2	11569000000	141	6	46	25	37	46	25	37	46	25	37	29	16.7	25.7	54	30	57
245	A6NHV6;B4DZM6;Q99640-4;Q99640-2;Q99640-3;Q99640;I3L3P0;I3L136	A6NHV6;B4DZM6;Q99640-4;Q99640-2;Q99640-3;Q99640	Membrane-associated tyrosine- and threonine-specific cdc2-inhibitory kinase	PKMYT1	tr|A6NHV6|A6NHV6_HUMAN Membrane-associated tyrosine- and threonine-specific cdc2-inhibitory kinase OS=Homo sapiens GN=PKMYT1 PE=1 SV=3;tr|B4DZM6|B4DZM6_HUMAN Membrane-associated tyrosine- and threonine-specific cdc2-inhibitory kinase OS=Homo sapiens GN=PKM	48320000	0	111380000	8405400	2543100	0	5862200	70245000	0	91652000	3	3	3	8.7	8.7	8.7	48.891	0	9.6045	159700000	3	8	1	0	3	1	0	3	1	0	3	2.9	0	8.7	1	0	2
246	A6NIR2;X6R7Y7;Q9Y547	A6NIR2;X6R7Y7;Q9Y547	Intraflagellar transport protein 25 homolog	HSPB11	tr|A6NIR2|A6NIR2_HUMAN Chromosome 1 open reading frame 41, isoform CRA_b OS=Homo sapiens GN=HSPB11 PE=1 SV=1;tr|X6R7Y7|X6R7Y7_HUMAN Intraflagellar transport protein 25 homolog OS=Homo sapiens GN=HSPB11 PE=1 SV=1;sp|Q9Y547|IFT25_HUMAN Intraflagellar transpo	21198000	0	176970000	49543000	5299600	0	44244000	21198000	0	0	2	2	2	28.6	28.6	28.6	13.028	0.0044779	1.8575	198170000	2	3	1	0	1	1	0	1	1	0	1	9.8	0	18.8	1	0	1
247	A6NJ78;A6NJ78-2;A6NJ78-4;P0C7V9;B5MC64;F8WD83;A6NJ78-3	A6NJ78	Probable methyltransferase-like protein 15	METTL15	sp|A6NJ78|MET15_HUMAN Probable methyltransferase-like protein 15 OS=Homo sapiens GN=METTL15 PE=2 SV=1	1309500000	342830000	1091300000	105530000	50366000	13186000	41974000	1029700000	954530000	1003700000	19	19	19	62.2	62.2	62.2	46.121	0	97.773	2743700000	51	7	15	10	14	15	10	14	15	10	14	54.8	33.4	46.4	20	14	17
248	A6NJA2;P54578-2;B7Z4N8;P54578;J3QQT6;J3KS55	A6NJA2;P54578-2;B7Z4N8;P54578	Ubiquitin carboxyl-terminal hydrolase;Ubiquitin carboxyl-terminal hydrolase 14	USP14	tr|A6NJA2|A6NJA2_HUMAN Ubiquitin carboxyl-terminal hydrolase OS=Homo sapiens GN=USP14 PE=1 SV=2;sp|P54578-2|UBP14_HUMAN Isoform 2 of Ubiquitin carboxyl-terminal hydrolase 14 OS=Homo sapiens GN=USP14;tr|B7Z4N8|B7Z4N8_HUMAN Ubiquitin carboxyl-terminal hydrol	1348800000	363420000	848850000	88312000	46510000	12532000	29271000	869420000	787120000	928260000	17	17	17	49.8	49.8	49.8	51.086	0	144.72	2561000000	49	6	15	8	9	15	8	9	15	8	9	44.9	22.8	30.8	21	14	14
249	A6NJX0;Q9H4F1	A6NJX0;Q9H4F1	Alpha-N-acetyl-neuraminyl-2,3-beta-galactosyl-1,3-N-acetyl-galactosaminide alpha-2,6-sialyltransferase	ST6GALNAC4	tr|A6NJX0|A6NJX0_HUMAN Alpha-N-acetyl-neuraminyl-2,3-beta-galactosyl-1,3-N-acetyl-galactosaminide alpha-2,6-sialyltransferase (Fragment) OS=Homo sapiens GN=ST6GALNAC4 PE=4 SV=4;sp|Q9H4F1|SIA7D_HUMAN Alpha-N-acetyl-neuraminyl-2,3-beta-galactosyl-1,3-N-acety	53042000	0	48166000	10121000	5304200	0	4816600	47874000	0	47959000	4	4	4	27.9	27.9	27.9	23.242	0	8.7659	101210000	5	2	3	0	2	3	0	2	3	0	2	19.9	0	13.9	3	0	2
250	A6NK58	A6NK58	Putative lipoyltransferase 2, mitochondrial	LIPT2	sp|A6NK58|LIPT2_HUMAN Putative lipoyltransferase 2, mitochondrial OS=Homo sapiens GN=LIPT2 PE=3 SV=1	25738000	10148000	89700000	12559000	2573800	1014800	8970000	23684000	0	0	3	3	3	19.5	19.5	19.5	25.195	0.00034252	2.9625	125590000	4	1	1	1	1	1	1	1	1	1	1	5.2	9.1	5.2	2	1	1
251	A6NKD9	A6NKD9	Coiled-coil domain-containing protein 85C	CCDC85C	sp|A6NKD9|CC85C_HUMAN Coiled-coil domain-containing protein 85C OS=Homo sapiens GN=CCDC85C PE=1 SV=1	456380000	0	13962000	22397000	21732000	0	664860	0	0	11505000	3	3	3	13.1	13.1	13.1	45.209	0	8.3952	470340000	4	1	3	0	1	3	0	1	3	0	1	13.1	0	5.5	3	0	1
252	F8WC89;A6NKF1;H0YEW7;A6NKF1-2	F8WC89;A6NKF1;H0YEW7;A6NKF1-2	SAC3 domain-containing protein 1	SAC3D1	tr|F8WC89|F8WC89_HUMAN SAC3 domain-containing protein 1 OS=Homo sapiens GN=SAC3D1 PE=1 SV=1;sp|A6NKF1|SAC31_HUMAN SAC3 domain-containing protein 1 OS=Homo sapiens GN=SAC3D1 PE=1 SV=2;tr|H0YEW7|H0YEW7_HUMAN SAC3 domain-containing protein 1 (Fragment) OS=Hom	68082000	19224000	39537000	6342200	3404100	961210	1976900	48679000	38901000	32091000	2	2	2	9.8	9.8	9.8	38.58	0	25.121	126840000	5	4	1	2	1	1	2	1	1	2	1	5.6	9.8	5.6	2	1	2
253	A6NKF7	A6NKF7	Transmembrane protein 88B	TMEM88B	sp|A6NKF7|TM88B_HUMAN Transmembrane protein 88B OS=Homo sapiens GN=TMEM88B PE=3 SV=1	54697000	0	53930000	13578000	6837100	0	6741200	36609000	0	52200000	1	1	1	9.2	9.2	9.2	17.097	0.00017937	3.8342	108630000	3	1	1	0	1	1	0	1	1	0	1	9.2	0	9.2	3	0	0
254	J3KNE0;A6NKT7	J3KNE0;A6NKT7	RanBP2-like and GRIP domain-containing protein 3	RGPD3	tr|J3KNE0|J3KNE0_HUMAN RanBP2-like and GRIP domain-containing protein 3 OS=Homo sapiens GN=RGPD3 PE=4 SV=2;sp|A6NKT7|RGPD3_HUMAN RanBP2-like and GRIP domain-containing protein 3 OS=Homo sapiens GN=RGPD3 PE=2 SV=2	94591000	173110000	34386000	2604200	815440	1492300	296430	84829000	285190000	60188000	30	2	0	20.7	1.5	0	197.62	0	5.9165	302080000	9	2	24	16	19	2	1	1	0	0	0	18.4	11.1	13.8	3	5	1
255	A6NLH6;Q9P003	A6NLH6;Q9P003	Protein cornichon homolog 4	CNIH4	tr|A6NLH6|A6NLH6_HUMAN Protein cornichon homolog 4 OS=Homo sapiens GN=CNIH4 PE=1 SV=1;sp|Q9P003|CNIH4_HUMAN Protein cornichon homolog 4 OS=Homo sapiens GN=CNIH4 PE=1 SV=1	885490000	31269000	1094300000	1005500000	442740000	15634000	547140000	626200000	88993000	732610000	1	1	1	14.6	14.6	14.6	15.771	0	23.469	2011000000	16	2	1	1	1	1	1	1	1	1	1	14.6	14.6	14.6	6	1	9
256	A6NN50;O75147;O75147-2;O75147-1;O75147-4;A8MSZ8	A6NN50;O75147;O75147-2;O75147-1;O75147-4;A8MSZ8	Obscurin-like protein 1	OBSL1	tr|A6NN50|A6NN50_HUMAN Obscurin-like protein 1 OS=Homo sapiens GN=OBSL1 PE=1 SV=1;sp|O75147|OBSL1_HUMAN Obscurin-like protein 1 OS=Homo sapiens GN=OBSL1 PE=1 SV=4;sp|O75147-2|OBSL1_HUMAN Isoform 2 of Obscurin-like protein 1 OS=Homo sapiens GN=OBSL1;sp|O751	962140000	71435000	345390000	14216000	9918900	736440	3560700	519240000	0	674790000	17	17	17	12.3	12.3	12.3	197.1	0	20.385	1379000000	18	6	10	4	7	10	4	7	10	4	7	6.9	3.1	5.2	9	3	6
257	A6NNI4;G8JLH6;P21926	A6NNI4;G8JLH6;P21926	Tetraspanin;CD9 antigen	CD9	tr|A6NNI4|A6NNI4_HUMAN Tetraspanin OS=Homo sapiens GN=CD9 PE=1 SV=1;tr|G8JLH6|G8JLH6_HUMAN Tetraspanin (Fragment) OS=Homo sapiens GN=CD9 PE=1 SV=1;sp|P21926|CD9_HUMAN CD9 antigen OS=Homo sapiens GN=CD9 PE=1 SV=4	324080000	168180000	232570000	120810000	54014000	28031000	38762000	329650000	396600000	240950000	2	2	2	22	22	22	17.764	0	23.906	724840000	10	3	2	2	2	2	2	2	2	2	2	22	22	22	3	4	3
258	A6NNK5;Q12888;Q12888-2;Q12888-3;C9JXV0;H7BZY0;M0R142;H7C3N7;H7C495	A6NNK5;Q12888;Q12888-2;Q12888-3	Tumor suppressor p53-binding protein 1	TP53BP1	tr|A6NNK5|A6NNK5_HUMAN Tumor suppressor p53-binding protein 1 OS=Homo sapiens GN=TP53BP1 PE=1 SV=2;sp|Q12888|TP53B_HUMAN Tumor suppressor p53-binding protein 1 OS=Homo sapiens GN=TP53BP1 PE=1 SV=2;sp|Q12888-2|TP53B_HUMAN Isoform 2 of Tumor suppressor p53-b	1092300000	258550000	770900000	21432000	11033000	2611600	7786900	824120000	777620000	755640000	29	29	29	25.5	25.5	25.5	209.02	0	100.63	2121800000	53	9	23	9	18	23	9	18	23	9	18	19.6	8.8	16.9	25	9	19
259	A6NNL5	A6NNL5	Uncharacterized protein C15orf61	C15orf61	sp|A6NNL5|CO061_HUMAN Uncharacterized protein C15orf61 OS=Homo sapiens GN=C15orf61 PE=2 SV=2	98843000	12705000	16404000	12795000	9884300	1270500	1640400	55134000	35504000	39626000	3	3	3	24.2	24.2	24.2	18.091	0.00034542	3.0663	127950000	5	1	3	1	1	3	1	1	3	1	1	24.2	5.1	14	3	1	1
260	B0YJ83;A6NP58;B0YJ81-2;B0YJ81	B0YJ83;A6NP58;B0YJ81-2;B0YJ81	Very-long-chain (3R)-3-hydroxyacyl-CoA dehydratase 1	PTPLA;HACD1	tr|B0YJ83|B0YJ83_HUMAN Protein tyrosine phosphatase-like, member A variant 4 OS=Homo sapiens GN=PTPLA PE=1 SV=1;tr|A6NP58|A6NP58_HUMAN Very-long-chain (3R)-3-hydroxyacyl-CoA dehydratase 1 OS=Homo sapiens GN=PTPLA PE=1 SV=2;sp|B0YJ81-2|HACD1_HUMAN Isoform 2	0	0	24065000	2187700	0	0	2187700	0	0	26179000	1	1	1	12.7	12.7	12.7	16.806	0.00034795	3.2061	24065000	1	4	0	0	1	0	0	1	0	0	1	0	0	12.7	0	0	1
261	A6PVN5;Q15257-3;Q15257-2;Q15257;Q5T949;Q5T948;A6PVN9;F6WIT2;C9IZ76;A6PVN6;A6PVN8;Q15257-4;A6PVN7;Q68CR8;B7ZBP9;B7ZBQ0;B7ZBP7;B4DDQ6;H0Y6E5	A6PVN5;Q15257-3;Q15257-2;Q15257;Q5T949;Q5T948;A6PVN9;F6WIT2;C9IZ76;A6PVN6;A6PVN8;Q15257-4	Serine/threonine-protein phosphatase 2A activator	PPP2R4	tr|A6PVN5|A6PVN5_HUMAN Serine/threonine-protein phosphatase 2A activator OS=Homo sapiens GN=PPP2R4 PE=1 SV=1;sp|Q15257-3|PTPA_HUMAN Isoform 3 of Serine/threonine-protein phosphatase 2A activator OS=Homo sapiens GN=PPP2R4;sp|Q15257-2|PTPA_HUMAN Isoform 1 of	294660000	27141000	205740000	25121000	14032000	1292400	9797000	286970000	140610000	116480000	6	6	6	31.9	31.9	31.9	37.375	0	20.086	527540000	15	19	5	1	3	5	1	3	5	1	3	28	8.8	15.8	8	1	6
262	Q5HY40;A6QRJ0;P49184	Q5HY40;A6QRJ0;P49184	Deoxyribonuclease-1-like 1	DNASE1L1	tr|Q5HY40|Q5HY40_HUMAN Deoxyribonuclease-1-like 1 (Fragment) OS=Homo sapiens GN=DNASE1L1 PE=4 SV=3;tr|A6QRJ0|A6QRJ0_HUMAN Deoxyribonuclease-1-like 1 (Fragment) OS=Homo sapiens GN=DNASE1L1 PE=4 SV=1;sp|P49184|DNSL1_HUMAN Deoxyribonuclease-1-like 1 OS=Homo s	4926100	0	0	821010	821010	0	0	4926100	0	0	1	1	1	21.2	21.2	21.2	11.74	0.0070544	1.5879	4926100	1	3	1	0	0	1	0	0	1	0	0	21.2	0	0	1	0	0
263	A8CG34;A0A075B7F8;A0A087WY75;A8CG34-2;A6NF01	A8CG34;A0A075B7F8;A0A087WY75;A8CG34-2	Nuclear envelope pore membrane protein POM 121C	POM121C	sp|A8CG34|P121C_HUMAN Nuclear envelope pore membrane protein POM 121C OS=Homo sapiens GN=POM121C PE=1 SV=2;tr|A0A075B7F8|A0A075B7F8_HUMAN Nuclear envelope pore membrane protein POM 121C OS=Homo sapiens GN=POM121C PE=1 SV=2;tr|A0A087WY75|A0A087WY75_HUMAN Nu	1413300000	351130000	1232200000	73087000	34470000	8564200	30053000	1246700000	883480000	907760000	21	21	5	27.3	27.3	7.4	125.06	0	107.18	2996600000	60	5	17	9	16	17	9	16	4	1	4	20.8	12.4	21.9	22	10	28
264	A8MQB8;G3V0J0;Q06787-6;Q06787-2;Q06787-4;Q06787-7;Q06787-8;Q06787-5;Q06787-9;Q06787-3;Q06787;A0A087WXI3;G8JLE9;R9WNI0;Q8IXW7;A0A087WY29;A0A087WWR6;A0A087X1M7;A0A087WWU4	A8MQB8;G3V0J0;Q06787-6;Q06787-2;Q06787-4;Q06787-7;Q06787-8;Q06787-5;Q06787-9;Q06787-3;Q06787;A0A087WXI3;G8JLE9;R9WNI0;Q8IXW7	Fragile X mental retardation protein 1	FMR1	tr|A8MQB8|A8MQB8_HUMAN Fragile X mental retardation protein 1 OS=Homo sapiens GN=FMR1 PE=1 SV=1;tr|G3V0J0|G3V0J0_HUMAN Fragile X mental retardation 1, isoform CRA_e OS=Homo sapiens GN=FMR1 PE=1 SV=1;sp|Q06787-6|FMR1_HUMAN Isoform 5 of Fragile X mental reta	489270000	371320000	585470000	41316000	13979000	10609000	16728000	466420000	729590000	572260000	16	15	14	31.8	30.4	27.1	65.821	0	36.451	1446100000	31	19	10	11	7	9	10	6	8	9	5	21.5	20.8	13.1	10	9	12
265	J3QLE5;A8MT02;P14678-2;P63162;P14678;P63162-2;P14678-3;J3KRY3;S4R3P3	J3QLE5;A8MT02;P14678-2;P63162;P14678;P63162-2;P14678-3;J3KRY3;S4R3P3	Small nuclear ribonucleoprotein-associated proteins B and B;Small nuclear ribonucleoprotein-associated protein N	SNRPN;SNRPB	tr|J3QLE5|J3QLE5_HUMAN Small nuclear ribonucleoprotein-associated protein N (Fragment) OS=Homo sapiens GN=SNRPN PE=4 SV=1;tr|A8MT02|A8MT02_HUMAN Small nuclear ribonucleoprotein-associated proteins B and B OS=Homo sapiens GN=SNRPB PE=1 SV=3;sp|P14678-2|RSM	5409900000	2224700000	5470700000	1191400000	491810000	202250000	497340000	5302800000	4290100000	4518200000	8	8	8	38.5	38.5	38.5	17.546	0	70.032	13105000000	118	9	8	8	8	8	8	8	8	8	8	38.5	38.5	38.5	43	37	38
266	A8MT37;P49840;M0QYV0	A8MT37;P49840	Glycogen synthase kinase-3 alpha	GSK3A	tr|A8MT37|A8MT37_HUMAN Glycogen synthase kinase-3 alpha OS=Homo sapiens GN=GSK3A PE=1 SV=2;sp|P49840|GSK3A_HUMAN Glycogen synthase kinase-3 alpha OS=Homo sapiens GN=GSK3A PE=1 SV=2	29792000	0	9146800	1769900	1354200	0	415760	0	0	8401100	3	3	3	12.5	12.5	12.5	44.919	0.00018038	3.9509	38939000	2	3	2	0	1	2	0	1	2	0	1	9.2	0	3.2	1	0	1
267	J3QR01;A8MT69;J3QRS1	J3QR01;A8MT69;J3QRS1	Centromere protein X	STRA13	tr|J3QR01|J3QR01_HUMAN Centromere protein X (Fragment) OS=Homo sapiens GN=STRA13 PE=4 SV=1;sp|A8MT69|CENPX_HUMAN Centromere protein X OS=Homo sapiens GN=STRA13 PE=1 SV=1;tr|J3QRS1|J3QRS1_HUMAN Centromere protein X OS=Homo sapiens GN=STRA13 PE=1 SV=1	0	0	238750000	39791000	0	0	39791000	0	0	181070000	2	2	2	30.7	30.7	30.7	8.2774	0.0044721	1.8439	238750000	2	3	0	0	2	0	0	2	0	0	2	0	0	30.7	0	0	2
268	A8MTF8;P58499-3;P58499;P58499-2	A8MTF8;P58499-3;P58499;P58499-2	Protein FAM3B	FAM3B	tr|A8MTF8|A8MTF8_HUMAN Protein FAM3B OS=Homo sapiens GN=FAM3B PE=4 SV=2;sp|P58499-3|FAM3B_HUMAN Isoform C of Protein FAM3B OS=Homo sapiens GN=FAM3B;sp|P58499|FAM3B_HUMAN Protein FAM3B OS=Homo sapiens GN=FAM3B PE=1 SV=2;sp|P58499-2|FAM3B_HUMAN Isoform A of	48718000	0	0	3247900	3247900	0	0	39719000	0	0	1	1	1	3.9	3.9	3.9	28.282	0.0088688	1.4856	48718000	1	4	1	0	0	1	0	0	1	0	0	3.9	0	0	1	0	0
269	A8MU21;Q9BVK8;Q9BVK8-2	A8MU21;Q9BVK8;Q9BVK8-2	Transmembrane protein 147	TMEM147	tr|A8MU21|A8MU21_HUMAN Transmembrane protein 147 OS=Homo sapiens GN=TMEM147 PE=4 SV=1;sp|Q9BVK8|TM147_HUMAN Transmembrane protein 147 OS=Homo sapiens GN=TMEM147 PE=1 SV=1;sp|Q9BVK8-2|TM147_HUMAN Isoform 2 of Transmembrane protein 147 OS=Homo sapiens GN=TME	92911000	70387000	191600000	32263000	8446500	6398800	17418000	175890000	133580000	130290000	2	2	2	15.8	15.8	15.8	21.141	0	23.972	354900000	8	3	1	2	2	1	2	2	1	2	2	9.2	15.8	15.8	2	3	3
270	A8MUM1;Q53HC9;F8WDS8;C9J0U9;D3YTH5;F8WDX0;F8WB12;C9JVR6	A8MUM1;Q53HC9;F8WDS8;C9J0U9;D3YTH5	Protein TSSC1	TSSC1	tr|A8MUM1|A8MUM1_HUMAN Protein TSSC1 OS=Homo sapiens GN=TSSC1 PE=1 SV=2;sp|Q53HC9|TSSC1_HUMAN Protein TSSC1 OS=Homo sapiens GN=TSSC1 PE=1 SV=2;tr|F8WDS8|F8WDS8_HUMAN Protein TSSC1 OS=Homo sapiens GN=TSSC1 PE=1 SV=1;tr|C9J0U9|C9J0U9_HUMAN Protein TSSC1 (Fra	67004000	0	102340000	9961300	3941400	0	6019900	69176000	0	83498000	3	3	3	11.1	11.1	11.1	46.319	0	13.503	169340000	2	8	2	0	2	2	0	2	2	0	2	8.9	0	7	1	0	1
271	A8MUP2	A8MUP2	Methyltransferase-like protein 12, mitochondrial	METTL12	sp|A8MUP2|MET12_HUMAN Methyltransferase-like protein 12, mitochondrial OS=Homo sapiens GN=METTL12 PE=2 SV=1	0	0	10768000	1196400	0	0	1196400	0	0	9601700	1	1	1	7.5	7.5	7.5	25.909	0.0011451	2.2734	10768000	1	1	0	0	1	0	0	1	0	0	1	0	0	7.5	0	0	1
272	P62308;A8MWD9;Q49AN9;F5H013;C9JVQ0	P62308;A8MWD9;Q49AN9;F5H013;C9JVQ0	Small nuclear ribonucleoprotein G;Putative small nuclear ribonucleoprotein G-like protein 15	SNRPG;SNRPGP15	sp|P62308|RUXG_HUMAN Small nuclear ribonucleoprotein G OS=Homo sapiens GN=SNRPG PE=1 SV=1;sp|A8MWD9|RUXGL_HUMAN Putative small nuclear ribonucleoprotein G-like protein 15 OS=Homo sapiens GN=SNRPGP15 PE=5 SV=2;tr|Q49AN9|Q49AN9_HUMAN SNRPG protein OS=Homo sa	2663700000	1309900000	2646800000	2206800000	887890000	436630000	882280000	2236500000	2224400000	2652600000	4	4	4	35.5	35.5	35.5	8.496	0	9.797	6620400000	32	5	3	4	3	3	4	3	3	4	3	26.3	35.5	26.3	9	12	11
273	A8MX75;P18074;E7EVE9;P18074-2;K7ENL1;K7EKF3;K7EIT8;B4E0F6	A8MX75;P18074;E7EVE9;P18074-2	TFIIH basal transcription factor complex helicase XPD subunit	ERCC2	tr|A8MX75|A8MX75_HUMAN TFIIH basal transcription factor complex helicase XPD subunit (Fragment) OS=Homo sapiens GN=ERCC2 PE=1 SV=2;sp|P18074|ERCC2_HUMAN TFIIH basal transcription factor complex helicase XPD subunit OS=Homo sapiens GN=ERCC2 PE=1 SV=1;tr|E7E	214500000	19045000	184720000	9727000	4988300	442900	4295800	168040000	0	215630000	12	12	12	22.8	22.8	22.8	80.511	0	45.984	418260000	17	8	10	1	4	10	1	4	10	1	4	18.3	2.7	9.5	10	1	6
274	A8MXP9;P43243;D6REM6;D6R991;H0Y8T4;B3KM87;P43243-2;Q68E03;D6RBK5;D6R8Z5;D6RBI2;D6RE02;D6RIA2;D6RB45;D6R9F3;D6RAM9;D6RAY2;D6RBS2;D6RCM3;D6REK4	A8MXP9;P43243;D6REM6;D6R991	Matrin-3	MATR3	tr|A8MXP9|A8MXP9_HUMAN Matrin-3 OS=Homo sapiens GN=MATR3 PE=1 SV=1;sp|P43243|MATR3_HUMAN Matrin-3 OS=Homo sapiens GN=MATR3 PE=1 SV=2;tr|D6REM6|D6REM6_HUMAN Matrin-3 OS=Homo sapiens GN=MATR3 PE=1 SV=1;tr|D6R991|D6R991_HUMAN Matrin-3 (Fragment) OS=Homo sapie	79666000000	30963000000	75575000000	3800100000	1625800000	631900000	1542300000	69459000000	70186000000	67010000000	43	43	43	51.6	51.6	51.6	99.966	0	323.31	186200000000	592	20	38	39	39	38	39	39	38	39	39	44.1	47.7	44.8	193	192	207
275	A8MXV4	A8MXV4	Nucleoside diphosphate-linked moiety X motif 19, mitochondrial	NUDT19	sp|A8MXV4|NUD19_HUMAN Nucleoside diphosphate-linked moiety X motif 19, mitochondrial OS=Homo sapiens GN=NUDT19 PE=1 SV=1	1194700000	413460000	1374600000	142030000	56890000	19689000	65455000	1092600000	1132700000	1109100000	13	13	13	48.8	48.8	48.8	42.233	0	135.74	2982700000	50	1	10	9	11	10	9	11	10	9	11	36.3	29.9	44.5	16	11	23
276	A8MXZ4;Q9NQ84;Q9NQ84-2;J9JIE0	A8MXZ4;Q9NQ84;Q9NQ84-2;J9JIE0	G-protein coupled receptor family C group 5 member C	GPRC5C	tr|A8MXZ4|A8MXZ4_HUMAN G-protein-coupled receptor family C group 5 member C (Fragment) OS=Homo sapiens GN=GPRC5C PE=1 SV=2;sp|Q9NQ84|GPC5C_HUMAN G-protein coupled receptor family C group 5 member C OS=Homo sapiens GN=GPRC5C PE=1 SV=2;sp|Q9NQ84-2|GPC5C_HUMA	252100000	66992000	118590000	29178000	16806000	4466100	7905800	165720000	153100000	187120000	3	3	3	9.5	9.5	9.5	50.111	0	10.372	437680000	11	4	3	3	2	3	3	2	3	3	2	9.5	9.5	6.7	4	4	3
277	A8MYQ9;Q9BZG1-4;Q9BZG1;C9JY26;C9JBG0;Q9BZG1-2;E7ES60;J3QLC6;K7EIF2;H7C0Y7;V9GY61;K7EJW7	A8MYQ9;Q9BZG1-4;Q9BZG1;C9JY26;C9JBG0;Q9BZG1-2;E7ES60	Ras-related protein Rab-34	RAB34	tr|A8MYQ9|A8MYQ9_HUMAN Ras-related protein Rab-34, isoform NARR OS=Homo sapiens GN=RAB34 PE=1 SV=2;sp|Q9BZG1-4|RAB34_HUMAN Isoform 4 of Ras-related protein Rab-34 OS=Homo sapiens GN=RAB34;sp|Q9BZG1|RAB34_HUMAN Ras-related protein Rab-34 OS=Homo sapiens GN=	353130000	64014000	194960000	32216000	18586000	3369100	10261000	307580000	164040000	182920000	7	7	7	34.2	34.2	34.2	29.2	0	14.66	612110000	13	12	6	3	3	6	3	3	6	3	3	28.5	16.9	14.6	7	3	3
278	E9PKT0;E9PPF7;A8MYS5;Q9UHJ9-3;Q9UHJ9;Q9UHJ9-5;Q9UHJ9-2	E9PKT0;E9PPF7;A8MYS5;Q9UHJ9-3;Q9UHJ9;Q9UHJ9-5;Q9UHJ9-2	Post-GPI attachment to proteins factor 2	PGAP2	tr|E9PKT0|E9PKT0_HUMAN Post-GPI attachment to proteins factor 2 OS=Homo sapiens GN=PGAP2 PE=4 SV=1;tr|E9PPF7|E9PPF7_HUMAN Post-GPI attachment to proteins factor 2 OS=Homo sapiens GN=PGAP2 PE=4 SV=1;tr|A8MYS5|A8MYS5_HUMAN Post-GPI attachment to proteins fac	33933000	75113000	0	36349000	11311000	25038000	0	46816000	181110000	0	1	1	1	11.7	11.7	11.7	11.386	0	5.0166	109050000	3	7	1	1	0	1	1	0	1	1	0	11.7	11.7	0	1	2	0
279	A8MYT4;Q8NEB9;K7ENH3;K7EIV6;M0R308;K7EKH3	A8MYT4;Q8NEB9	Phosphatidylinositol 3-kinase;Phosphatidylinositol 3-kinase catalytic subunit type 3	PIK3C3	tr|A8MYT4|A8MYT4_HUMAN Phosphatidylinositol 3-kinase OS=Homo sapiens GN=PIK3C3 PE=1 SV=2;sp|Q8NEB9|PK3C3_HUMAN Phosphatidylinositol 3-kinase catalytic subunit type 3 OS=Homo sapiens GN=PIK3C3 PE=1 SV=1	140610000	0	27362000	3169300	2653000	0	516260	91087000	0	0	3	3	3	5.3	5.3	5.3	94.399	0	7.7594	167970000	4	6	2	0	1	2	0	1	2	0	1	3.6	0	1.7	3	0	1
280	A8MZF9;P55039;J3QRI9;J3QKW7;J3QR71;J3QL90;J3KRL5;J3QKV7	A8MZF9;P55039;J3QRI9;J3QKW7	Developmentally-regulated GTP-binding protein 2	DRG2	tr|A8MZF9|A8MZF9_HUMAN Developmentally-regulated GTP-binding protein 2 OS=Homo sapiens GN=DRG2 PE=1 SV=1;sp|P55039|DRG2_HUMAN Developmentally-regulated GTP-binding protein 2 OS=Homo sapiens GN=DRG2 PE=1 SV=1;tr|J3QRI9|J3QRI9_HUMAN Developmentally-regulated	94830000	23138000	66154000	8005300	4123100	1006000	2876300	76314000	93776000	35006000	6	5	5	20.4	18.4	18.4	38.129	0	17.236	184120000	7	8	5	3	3	4	2	2	4	2	2	14.6	10.5	10.5	4	2	1
281	B0V3J0;A9C4B9;E7EQB3;Q9BSV6	B0V3J0;A9C4B9;E7EQB3;Q9BSV6	tRNA-splicing endonuclease subunit Sen34	TSEN34	tr|B0V3J0|B0V3J0_HUMAN tRNA-splicing endonuclease subunit Sen34 (Fragment) OS=Homo sapiens GN=TSEN34 PE=1 SV=1;tr|A9C4B9|A9C4B9_HUMAN tRNA-splicing endonuclease subunit Sen34 (Fragment) OS=Homo sapiens GN=TSEN34 PE=1 SV=2;tr|E7EQB3|E7EQB3_HUMAN tRNA-splici	28009000	0	40285000	4552900	1867200	0	2685600	35356000	0	26987000	2	2	2	10.7	10.7	10.7	26.101	0	5.6996	68293000	4	4	1	0	2	1	0	2	1	0	2	5.4	0	10.7	1	0	3
282	A9X3U0;Q96GF1	A9X3U0;Q96GF1	E3 ubiquitin-protein ligase RNF185	RNF185	tr|A9X3U0|A9X3U0_HUMAN BSK65-TEST2 OS=Homo sapiens GN=RNF185 PE=2 SV=1;sp|Q96GF1|RN185_HUMAN E3 ubiquitin-protein ligase RNF185 OS=Homo sapiens GN=RNF185 PE=1 SV=1	255990000	12323000	273220000	90255000	42665000	2053900	45536000	149040000	195540000	187680000	2	2	2	14	14	14	16.786	0	5.7121	541530000	8	2	1	2	2	1	2	2	1	2	2	9.6	14	14	2	2	4
283	A9Z1X7;Q8IYB3-2;Q8IYB3;E9PCT1;M0R088;M0R1E7;M0QXG5	A9Z1X7;Q8IYB3-2;Q8IYB3;E9PCT1;M0R088	Serine/arginine repetitive matrix protein 1	SRRM1	tr|A9Z1X7|A9Z1X7_HUMAN Serine/arginine repetitive matrix protein 1 OS=Homo sapiens GN=SRRM1 PE=1 SV=1;sp|Q8IYB3-2|SRRM1_HUMAN Isoform 2 of Serine/arginine repetitive matrix protein 1 OS=Homo sapiens GN=SRRM1;sp|Q8IYB3|SRRM1_HUMAN Serine/arginine repetitive	2932300000	1107100000	2560600000	126920000	56391000	21290000	49241000	3079500000	2862800000	1991900000	13	13	13	16	16	16	103.39	0	73.963	6600000000	44	7	8	6	10	8	6	10	8	6	10	11.3	8.7	14.5	12	13	19
284	B0QY63;B0QY65	B0QY63;B0QY65		SUN2	tr|B0QY63|B0QY63_HUMAN SUN domain-containing protein 2 (Fragment) OS=Homo sapiens GN=SUN2 PE=1 SV=1;tr|B0QY65|B0QY65_HUMAN SUN domain-containing protein 2 (Fragment) OS=Homo sapiens GN=SUN2 PE=1 SV=1	0	15216000	0	2173700	0	2173700	0	0	44780000	0	5	1	1	49.6	11.2	11.2	25.399	0.0043214	1.8683	15216000	1	2	4	5	4	0	1	0	0	1	0	38.4	49.6	38.4	0	1	0
285	B0QY89;Q9Y262-2;Q9Y262;B0QY90;C9JHP4;C9K0Q7;H7C3A0;H0Y7E6	B0QY89;Q9Y262-2;Q9Y262;B0QY90	Eukaryotic translation initiation factor 3 subunit L	EIF3L	tr|B0QY89|B0QY89_HUMAN Eukaryotic translation initiation factor 3 subunit L OS=Homo sapiens GN=EIF3L PE=1 SV=1;sp|Q9Y262-2|EIF3L_HUMAN Isoform 2 of Eukaryotic translation initiation factor 3 subunit L OS=Homo sapiens GN=EIF3L;sp|Q9Y262|EIF3L_HUMAN Eukaryot	2151100000	956390000	2073400000	157000000	65185000	28981000	62832000	2070200000	2119700000	2077600000	21	21	21	39	39	39	70.901	0	186.67	5180900000	75	8	19	17	15	19	17	15	19	17	15	37.7	32.6	33.3	24	26	25
286	B0QY95;Q9NQG6;Q9NQG6-2	B0QY95;Q9NQG6	Mitochondrial dynamics protein MID51	MIEF1	tr|B0QY95|B0QY95_HUMAN Mitochondrial dynamics protein MID51 OS=Homo sapiens GN=MIEF1 PE=1 SV=1;sp|Q9NQG6|MID51_HUMAN Mitochondrial dynamics protein MID51 OS=Homo sapiens GN=MIEF1 PE=1 SV=1	142830000	50936000	17223000	7535400	5101200	1819100	615090	107900000	133930000	0	6	6	6	16.5	16.5	16.5	53.331	0	24.891	210990000	8	3	3	4	2	3	4	2	3	4	2	7.1	11.9	4.6	3	3	2
287	B0QYD3;Q9UH17;Q9UH17-3;Q9UH17-2;Q6ICH2;P31941-2;P31941;Q96AK3	B0QYD3;Q9UH17;Q9UH17-3;Q9UH17-2	DNA dC->dU-editing enzyme APOBEC-3B	APOBEC3B	tr|B0QYD3|B0QYD3_HUMAN DNA dC->dU-editing enzyme APOBEC-3B OS=Homo sapiens GN=APOBEC3B PE=4 SV=1;sp|Q9UH17|ABC3B_HUMAN DNA dC->dU-editing enzyme APOBEC-3B OS=Homo sapiens GN=APOBEC3B PE=1 SV=1;sp|Q9UH17-3|ABC3B_HUMAN Isoform 3 of DNA dC->dU-editing enzyme	526850000	153570000	369590000	37500000	18816000	5484500	13200000	340330000	460390000	398250000	9	9	9	25.1	25.1	25.1	57.208	0	38.707	1050000000	22	8	7	3	6	7	3	6	7	3	6	21.2	9	16.7	10	6	6
288	B0QYH2;Q8IWL3;F8WBY7	B0QYH2;Q8IWL3	Iron-sulfur cluster co-chaperone protein HscB, mitochondrial	HSCB	tr|B0QYH2|B0QYH2_HUMAN Iron-sulfur cluster co-chaperone protein HscB, mitochondrial OS=Homo sapiens GN=HSCB PE=1 SV=1;sp|Q8IWL3|HSC20_HUMAN Iron-sulfur cluster co-chaperone protein HscB, mitochondrial OS=Homo sapiens GN=HSCB PE=1 SV=3	141380000	62155000	117750000	26774000	11782000	5179600	9812700	103250000	184750000	91244000	3	3	3	17.5	17.5	17.5	16.529	0.00018096	4.0148	321290000	8	3	3	1	3	3	1	3	3	1	3	17.5	5.6	17.5	3	1	4
289	B0QYK0;Q01844-6;Q01844-3;Q01844;Q01844-5;C9JGE3;Q01844-2;H7BY36;F8WC90;Q01844-4	B0QYK0;Q01844-6;Q01844-3;Q01844;Q01844-5;C9JGE3;Q01844-2;H7BY36	RNA-binding protein EWS	EWSR1	tr|B0QYK0|B0QYK0_HUMAN RNA-binding protein EWS OS=Homo sapiens GN=EWSR1 PE=1 SV=1;sp|Q01844-6|EWS_HUMAN Isoform 6 of RNA-binding protein EWS OS=Homo sapiens GN=EWSR1;sp|Q01844-3|EWS_HUMAN Isoform 3 of RNA-binding protein EWS OS=Homo sapiens GN=EWSR1;sp|Q01	2830900000	1100000000	2516300000	280310000	123080000	47826000	109400000	1944600000	2234100000	1958300000	8	8	8	17	17	17	64.929	0	124.56	6447200000	62	10	8	6	7	8	6	7	8	6	7	17	14.1	17	21	19	22
290	U3KQS8;F8WC47;U3KPY1;U3KQB0;B0QYL8;B0QYL9;P61218	U3KQS8;F8WC47;U3KPY1;U3KQB0;B0QYL8;B0QYL9;P61218	DNA-directed RNA polymerases I, II, and III subunit RPABC2	POLR2F	tr|U3KQS8|U3KQS8_HUMAN DNA-directed RNA polymerases I, II, and III subunit RPABC2 OS=Homo sapiens GN=POLR2F PE=1 SV=1;tr|F8WC47|F8WC47_HUMAN DNA-directed RNA polymerases I, II, and III subunit RPABC2 OS=Homo sapiens GN=POLR2F PE=1 SV=1;tr|U3KPY1|U3KPY1_HUM	127000000	0	100850000	75948000	42332000	0	33616000	78433000	0	109120000	2	2	2	34.7	34.7	34.7	11.078	0.00017892	3.7915	227840000	3	7	2	0	1	2	0	1	2	0	1	34.7	0	8.2	2	0	1
291	B1AKB1;B1AKB2;B1AKB4;B0QYS6;B0QYS7;P19484	B1AKB1;B1AKB2;B1AKB4;B0QYS6;B0QYS7;P19484	Transcription factor EB	TFEB	tr|B1AKB1|B1AKB1_HUMAN Transcription factor EB (Fragment) OS=Homo sapiens GN=TFEB PE=1 SV=3;tr|B1AKB2|B1AKB2_HUMAN Transcription factor EB (Fragment) OS=Homo sapiens GN=TFEB PE=1 SV=1;tr|B1AKB4|B1AKB4_HUMAN Transcription factor EB OS=Homo sapiens GN=TFEB P	0	0	17905000	2557800	0	0	2557800	0	0	15437000	1	1	1	9	9	9	24.585	0.0070467	1.5735	17905000	1	6	0	0	1	0	0	1	0	0	1	0	0	9	0	0	1
292	B0QYW5;F6RTR7;O43808;F8WE74	B0QYW5;F6RTR7;O43808;F8WE74	Peroxisomal membrane protein PMP34	SLC25A17	tr|B0QYW5|B0QYW5_HUMAN Peroxisomal membrane protein PMP34 OS=Homo sapiens GN=SLC25A17 PE=3 SV=1;tr|F6RTR7|F6RTR7_HUMAN Peroxisomal membrane protein PMP34 OS=Homo sapiens GN=SLC25A17 PE=4 SV=1;sp|O43808|PM34_HUMAN Peroxisomal membrane protein PMP34 OS=Homo	468760000	148840000	321150000	72212000	36059000	11449000	24704000	389500000	345780000	372110000	8	8	8	37.3	37.3	37.3	25.721	0	21.835	938750000	18	4	5	4	4	5	4	4	5	4	4	28	21.3	21.8	7	5	6
293	B0QZ43	B0QZ43		ERLIN1	tr|B0QZ43|B0QZ43_HUMAN Erlin-1 (Fragment) OS=Homo sapiens GN=ERLIN1 PE=1 SV=1	160370000	0	97896000	12913000	8018600	0	4894800	97470000	0	119380000	16	1	1	60.4	2.5	2.5	31.077	1	-2	258270000	7	1	14	11	10	1	0	1	1	0	1	60	38.5	45.5	3	0	4
294	B0R0U3;Q9NRG4	B0R0U3;Q9NRG4	N-lysine methyltransferase SMYD2	SMYD2	tr|B0R0U3|B0R0U3_HUMAN N-lysine methyltransferase SMYD2 (Fragment) OS=Homo sapiens GN=SMYD2 PE=4 SV=2;sp|Q9NRG4|SMYD2_HUMAN N-lysine methyltransferase SMYD2 OS=Homo sapiens GN=SMYD2 PE=1 SV=2	16880000	0	0	4220100	4220100	0	0	16880000	0	0	1	1	1	15.3	15.3	15.3	11.423	0.00082372	2.3712	16880000	1	2	1	0	0	1	0	0	1	0	0	15.3	0	0	1	0	0
295	B0YIW2;P02656	B0YIW2;P02656	Apolipoprotein C-III	APOC3	tr|B0YIW2|B0YIW2_HUMAN Apolipoprotein C-III OS=Homo sapiens GN=APOC3 PE=1 SV=1;sp|P02656|APOC3_HUMAN Apolipoprotein C-III OS=Homo sapiens GN=APOC3 PE=1 SV=1	52301000	79636000	96432000	25374000	5811200	8848400	10715000	66112000	151340000	137210000	1	1	1	13.7	13.7	13.7	12.815	0	8.238	228370000	4	2	1	1	1	1	1	1	1	1	1	13.7	13.7	13.7	1	2	1
296	B1AH87;P30536	B1AH87;P30536	Translocator protein	TSPO	tr|B1AH87|B1AH87_HUMAN Putative peripheral benzodiazepine receptor-related protein (Fragment) OS=Homo sapiens GN=TSPO PE=1 SV=1;sp|P30536|TSPOA_HUMAN Translocator protein OS=Homo sapiens GN=TSPO PE=1 SV=3	662910000	666350000	698800000	338010000	110480000	111060000	116470000	661900000	1382300000	950230000	4	4	4	43	43	43	11.896	0	10.747	2028100000	11	2	3	3	2	3	3	2	3	3	2	36.4	21.5	15	5	4	2
297	B1AHQ7;B1AHQ6;Q9NSP4-4;Q9NSP4-2;Q9NSP4	B1AHQ7;B1AHQ6;Q9NSP4-4;Q9NSP4-2;Q9NSP4	Centromere protein M	CENPM	tr|B1AHQ7|B1AHQ7_HUMAN Centromere protein M OS=Homo sapiens GN=CENPM PE=1 SV=1;tr|B1AHQ6|B1AHQ6_HUMAN Centromere protein M OS=Homo sapiens GN=CENPM PE=1 SV=1;sp|Q9NSP4-4|CENPM_HUMAN Isoform 4 of Centromere protein M OS=Homo sapiens GN=CENPM;sp|Q9NSP4-2|CEN	20712000	0	0	3452100	3452100	0	0	11915000	0	0	1	1	1	13.7	13.7	13.7	8.0974	0.0091615	1.4661	20712000	0	5	1	0	0	1	0	0	1	0	0	13.7	0	0	0	0	0
298	B1AHR2	B1AHR2		2003-09-01	tr|B1AHR2|B1AHR2_HUMAN Neuronal-specific septin-3 (Fragment) OS=Homo sapiens GN=SEPT3 PE=4 SV=1	0	0	82832000	7530200	0	0	7530200	0	0	68257000	1	1	1	9	9	9	20.234	1	-2	82832000	1	1	0	0	1	0	0	1	0	0	1	0	0	9	0	0	1
299	B1AJY5;B1AJY7;O75832	B1AJY5;B1AJY7;O75832	26S proteasome non-ATPase regulatory subunit 10	PSMD10	tr|B1AJY5|B1AJY5_HUMAN 26S proteasome non-ATPase regulatory subunit 10 OS=Homo sapiens GN=PSMD10 PE=1 SV=1;tr|B1AJY7|B1AJY7_HUMAN 26S proteasome non-ATPase regulatory subunit 10 OS=Homo sapiens GN=PSMD10 PE=1 SV=1;sp|O75832|PSD10_HUMAN 26S proteasome non-A	0	14329000	0	1194100	0	1194100	0	0	34874000	0	1	1	1	11.9	11.9	11.9	20.217	0.0067557	1.6054	14329000	1	3	0	1	0	0	1	0	0	1	0	0	11.9	0	0	1	0
300	B1AK61;Q5VTY9-6;Q5VTY9-5;Q5VTY9-2;Q5VTY9;Q5VTY9-7;Q5VTY9-3	B1AK61;Q5VTY9-6;Q5VTY9-5;Q5VTY9-2;Q5VTY9;Q5VTY9-7;Q5VTY9-3	Protein-cysteine N-palmitoyltransferase HHAT	HHAT	tr|B1AK61|B1AK61_HUMAN Protein-cysteine N-palmitoyltransferase HHAT OS=Homo sapiens GN=HHAT PE=2 SV=1;sp|Q5VTY9-6|HHAT_HUMAN Isoform 6 of Protein-cysteine N-palmitoyltransferase HHAT OS=Homo sapiens GN=HHAT;sp|Q5VTY9-5|HHAT_HUMAN Isoform 5 of Protein-cyste	17556000	0	9259400	4469300	2926100	0	1543200	16156000	0	11220000	1	1	1	7.1	7.1	7.1	20.823	0.00034953	3.2748	26816000	2	7	1	0	1	1	0	1	1	0	1	7.1	0	7.1	1	0	1
301	B1AKL4;Q9NRA8-2;Q9NRA8;Q9NRA8-3	B1AKL4;Q9NRA8-2;Q9NRA8;Q9NRA8-3	Eukaryotic translation initiation factor 4E transporter	EIF4ENIF1	tr|B1AKL4|B1AKL4_HUMAN Eukaryotic translation initiation factor 4E transporter OS=Homo sapiens GN=EIF4ENIF1 PE=1 SV=1;sp|Q9NRA8-2|4ET_HUMAN Isoform 2 of Eukaryotic translation initiation factor 4E transporter OS=Homo sapiens GN=EIF4ENIF1;sp|Q9NRA8|4ET_HUMA	9516900	0	3564400	272530	198270	0	74259	7879300	0	3911400	1	1	1	2.8	2.8	2.8	105.55	0.0011444	2.2637	13081000	2	4	1	0	1	1	0	1	1	0	1	2.8	0	2.8	1	0	1
302	B1AKY9;P50993	B1AKY9;P50993	Sodium/potassium-transporting ATPase subunit alpha-2	ATP1A2	tr|B1AKY9|B1AKY9_HUMAN Sodium/potassium-transporting ATPase subunit alpha-2 OS=Homo sapiens GN=ATP1A2 PE=1 SV=1;sp|P50993|AT1A2_HUMAN Sodium/potassium-transporting ATPase subunit alpha-2 OS=Homo sapiens GN=ATP1A2 PE=1 SV=1	128950000	57565000	222400000	7302100	2302700	1027900	3971400	85866000	139430000	285750000	19	2	2	20.1	2.5	2.5	110.86	0.00018057	3.9824	408920000	5	2	17	17	18	1	1	2	1	1	2	19.3	19.3	20.1	2	1	2
303	B1ALH6;O14832-2;O14832;C9IYS5	B1ALH6;O14832-2;O14832;C9IYS5	Phytanoyl-CoA dioxygenase, peroxisomal	PHYH	tr|B1ALH6|B1ALH6_HUMAN Phytanoyl-CoA dioxygenase, peroxisomal OS=Homo sapiens GN=PHYH PE=4 SV=1;sp|O14832-2|PAHX_HUMAN Isoform 2 of Phytanoyl-CoA dioxygenase, peroxisomal OS=Homo sapiens GN=PHYH;sp|O14832|PAHX_HUMAN Phytanoyl-CoA dioxygenase, peroxisomal O	22009000	0	620760000	29217000	1000400	0	28216000	345650000	0	256930000	3	3	3	12.1	12.1	12.1	36.965	0.00033921	2.8007	642770000	4	4	1	0	3	1	0	3	1	0	3	5.6	0	12.1	1	0	3
304	B1ALK7;Q14155-1;Q14155-5;E9PDQ5;Q14155-6;Q14155-2;Q14155-3;Q14155;E7EUY6;F6SJA5	B1ALK7;Q14155-1;Q14155-5;E9PDQ5;Q14155-6;Q14155-2;Q14155-3;Q14155;E7EUY6	Rho guanine nucleotide exchange factor 7	ARHGEF7	tr|B1ALK7|B1ALK7_HUMAN Rho guanine nucleotide exchange factor 7 OS=Homo sapiens GN=ARHGEF7 PE=1 SV=1;sp|Q14155-1|ARHG7_HUMAN Isoform 1 of Rho guanine nucleotide exchange factor 7 OS=Homo sapiens GN=ARHGEF7;sp|Q14155-5|ARHG7_HUMAN Isoform 5 of Rho guanine n	104660000	7287600	79458000	4557400	2492000	173510	1891900	74428000	0	57419000	5	5	5	9.8	9.8	9.8	79.831	0	7.2233	191410000	6	10	3	1	2	3	1	2	3	1	2	5.7	1.7	5.2	3	0	3
305	B1ALM5;Q9P0T7;B1ALM7;B1ALM4;F2Z389;B1ALM8	B1ALM5;Q9P0T7;B1ALM7;B1ALM4;F2Z389;B1ALM8	Transmembrane protein 9	TMEM9	tr|B1ALM5|B1ALM5_HUMAN Transmembrane protein 9 OS=Homo sapiens GN=TMEM9 PE=1 SV=1;sp|Q9P0T7|TMEM9_HUMAN Transmembrane protein 9 OS=Homo sapiens GN=TMEM9 PE=1 SV=1;tr|B1ALM7|B1ALM7_HUMAN Transmembrane protein 9 (Fragment) OS=Homo sapiens GN=TMEM9 PE=4 SV=1;	146800000	75222000	108350000	27532000	12234000	6268500	9029500	180690000	107770000	110660000	4	4	4	36	36	36	20.958	0	15.198	330380000	8	6	2	3	2	2	3	2	2	3	2	22	21	10.8	3	2	3
306	B1ALU1;B1ALU3;O95490-3;O95490-4;O95490-2;O95490-5;O95490;O95490-7;O95490-6;H0Y5C0;H0Y3V3	B1ALU1;B1ALU3;O95490-3;O95490-4;O95490-2;O95490-5;O95490;O95490-7;O95490-6;H0Y5C0	Latrophilin-2	ADGRL2;LPHN2	tr|B1ALU1|B1ALU1_HUMAN Latrophilin-2 OS=Homo sapiens GN=LPHN2 PE=1 SV=1;tr|B1ALU3|B1ALU3_HUMAN Latrophilin 2, isoform CRA_k OS=Homo sapiens GN=LPHN2 PE=1 SV=1;sp|O95490-3|LPHN2_HUMAN Isoform 3 of Latrophilin-2 OS=Homo sapiens GN=LPHN2;sp|O95490-4|LPHN2_HUM	237290000	28169000	206550000	7151700	3595300	426800	3129600	172310000	0	209350000	9	9	9	9.8	9.8	9.8	155.55	0	55.697	472010000	15	11	7	1	5	7	1	5	7	1	5	7.8	1	6.2	9	1	5
307	B1AMB1;B1AMB2;Q9BPZ7-5;Q9BPZ7-6;Q9BPZ7-3;Q9BPZ7-2;Q9BPZ7	B1AMB1;B1AMB2;Q9BPZ7-5;Q9BPZ7-6;Q9BPZ7-3;Q9BPZ7-2;Q9BPZ7	Target of rapamycin complex 2 subunit MAPKAP1	MAPKAP1	tr|B1AMB1|B1AMB1_HUMAN Target of rapamycin complex 2 subunit MAPKAP1 (Fragment) OS=Homo sapiens GN=MAPKAP1 PE=4 SV=1;tr|B1AMB2|B1AMB2_HUMAN Target of rapamycin complex 2 subunit MAPKAP1 (Fragment) OS=Homo sapiens GN=MAPKAP1 PE=4 SV=1;sp|Q9BPZ7-5|SIN1_HUMAN	40713000	7978800	0	16231000	13571000	2659600	0	31968000	19405000	0	1	1	1	15.1	15.1	15.1	10.36	0	5.0108	48692000	2	7	1	1	0	1	1	0	1	1	0	15.1	15.1	0	1	1	0
308	B1AMF0;Q8N2K1;D6RD90;A6NGS0;Q8N2K1-2;Q8N2K1-3;D6RB84;D6RA15;D6RC43	B1AMF0;Q8N2K1;D6RD90;A6NGS0;Q8N2K1-2;Q8N2K1-3	Ubiquitin-conjugating enzyme E2 J2	UBE2J2	tr|B1AMF0|B1AMF0_HUMAN Ubiquitin-conjugating enzyme E2 J2 (Fragment) OS=Homo sapiens GN=UBE2J2 PE=4 SV=1;sp|Q8N2K1|UB2J2_HUMAN Ubiquitin-conjugating enzyme E2 J2 OS=Homo sapiens GN=UBE2J2 PE=1 SV=3;tr|D6RD90|D6RD90_HUMAN Ubiquitin-conjugating enzyme E2 J2	223110000	74772000	329440000	62733000	22311000	7477200	32944000	239080000	214390000	256620000	5	5	5	33.2	33.2	33.2	22.322	0	27.446	627330000	11	9	3	3	4	3	3	4	3	3	4	21.4	19.9	32.1	4	3	4
309	Q5JTU8;B1AMJ5;Q96SN8-3;Q96SN8-2;Q96SN8;Q96SN8-4	Q5JTU8;B1AMJ5;Q96SN8-3;Q96SN8-2;Q96SN8;Q96SN8-4	CDK5 regulatory subunit-associated protein 2	CDK5RAP2	tr|Q5JTU8|Q5JTU8_HUMAN CDK5 regulatory subunit-associated protein 2 (Fragment) OS=Homo sapiens GN=CDK5RAP2 PE=1 SV=1;tr|B1AMJ5|B1AMJ5_HUMAN CDK5 regulatory subunit-associated protein 2 (Fragment) OS=Homo sapiens GN=CDK5RAP2 PE=1 SV=1;sp|Q96SN8-3|CK5P2_HUMA	1843000000	0	99975000	37365000	35442000	0	1922600	1084200000	0	0	6	6	6	8.9	8.9	8.9	102.32	0	12.103	1943000000	5	6	3	0	3	3	0	3	3	0	3	4.4	0	4.4	3	0	2
310	B1AMS2;Q14141-2;Q14141-4;Q14141;Q14141-3	B1AMS2;Q14141-2;Q14141-4;Q14141	Septin-6	2006-09-01	tr|B1AMS2|B1AMS2_HUMAN Septin 6, isoform CRA_b OS=Homo sapiens GN=SEPT6 PE=1 SV=1;sp|Q14141-2|SEPT6_HUMAN Isoform I of Septin-6 OS=Homo sapiens GN=SEPT6;sp|Q14141-4|SEPT6_HUMAN Isoform V of Septin-6 OS=Homo sapiens GN=SEPT6;sp|Q14141|SEPT6_HUMAN Septin-6 O	78039000	10296000	68295000	6265200	3121600	411850	2731800	52992000	45878000	48387000	7	4	4	22.3	16	16	49.303	0	41.463	156630000	7	5	5	1	6	3	1	3	3	1	3	20.6	4.6	17.6	3	1	3
311	B1AMW1;P19256-2;P19256-3;P19256;H0YDI1	B1AMW1;P19256-2;P19256-3;P19256;H0YDI1	Lymphocyte function-associated antigen 3	CD58	tr|B1AMW1|B1AMW1_HUMAN CD58 antigen, (Lymphocyte function-associated antigen 3), isoform CRA_c OS=Homo sapiens GN=CD58 PE=4 SV=1;sp|P19256-2|LFA3_HUMAN Isoform 2 of Lymphocyte function-associated antigen 3 OS=Homo sapiens GN=CD58;sp|P19256-3|LFA3_HUMAN Iso	12291000	0	88353000	12581000	1536400	0	11044000	0	0	99452000	2	2	2	10.4	10.4	10.4	27.018	0	5.1356	100640000	2	5	1	0	1	1	0	1	1	0	1	6.2	0	4.2	1	0	1
312	B1ANH5;B1ANH0;B1ANG9;B1ANH2;Q16774;Q16774-2;Q16774-3;B1ANH6;B1ANH3	B1ANH5;B1ANH0;B1ANG9;B1ANH2;Q16774;Q16774-2;Q16774-3;B1ANH6;B1ANH3	Guanylate kinase	GUK1	tr|B1ANH5|B1ANH5_HUMAN Guanylate kinase OS=Homo sapiens GN=GUK1 PE=1 SV=1;tr|B1ANH0|B1ANH0_HUMAN Guanylate kinase (Fragment) OS=Homo sapiens GN=GUK1 PE=1 SV=1;tr|B1ANG9|B1ANG9_HUMAN Guanylate kinase OS=Homo sapiens GN=GUK1 PE=1 SV=2;tr|B1ANH2|B1ANH2_HUMAN	350760000	72635000	260740000	62194000	31888000	6603200	23703000	254140000	198050000	224200000	4	4	4	28.6	28.6	28.6	21.999	0	13.024	684140000	11	9	3	3	3	3	3	3	3	3	3	22.6	17.6	22.6	4	3	4
313	B1ANS9-2;B1ANS9	B1ANS9-2;B1ANS9	WD repeat-containing protein 64	WDR64	sp|B1ANS9-2|WDR64_HUMAN Isoform 2 of WD repeat-containing protein 64 OS=Homo sapiens GN=WDR64;sp|B1ANS9|WDR64_HUMAN WD repeat-containing protein 64 OS=Homo sapiens GN=WDR64 PE=2 SV=1	89974000	186800000	129120000	7658300	1697600	3524500	2436200	54121000	0	114150000	2	2	2	2.1	2.1	2.1	105.02	0.0094442	1.4342	405890000	3	2	1	1	1	1	1	1	1	1	1	0.8	1.3	0.8	1	1	1
314	H3BLV0;B1AP13;H7BY55;P08174-4;P08174;P08174-3;P08174-5;P08174-2;P08174-6;P08174-7;B1AP15	H3BLV0;B1AP13;H7BY55;P08174-4;P08174;P08174-3;P08174-5;P08174-2;P08174-6;P08174-7;B1AP15	Complement decay-accelerating factor	CD55	tr|H3BLV0|H3BLV0_HUMAN Complement decay-accelerating factor (Fragment) OS=Homo sapiens GN=CD55 PE=1 SV=1;tr|B1AP13|B1AP13_HUMAN Complement decay-accelerating factor OS=Homo sapiens GN=CD55 PE=1 SV=1;tr|H7BY55|H7BY55_HUMAN Complement decay-accelerating fact	687410000	264460000	667360000	80961000	34370000	13223000	33368000	668410000	572970000	595750000	7	7	7	24.2	24.2	24.2	35.695	0	40.329	1619200000	22	11	6	5	6	6	5	6	6	5	6	21.5	16.9	22.1	8	6	8
315	B1APR7;Q99504-2;Q99504-4;Q99504-5;Q99504-3;Q99504	B1APR7;Q99504-2;Q99504-4;Q99504-5;Q99504-3;Q99504	Eyes absent homolog;Eyes absent homolog 3	EYA3	tr|B1APR7|B1APR7_HUMAN Eyes absent homolog 3 OS=Homo sapiens GN=EYA3 PE=1 SV=1;sp|Q99504-2|EYA3_HUMAN Isoform 2 of Eyes absent homolog 3 OS=Homo sapiens GN=EYA3;sp|Q99504-4|EYA3_HUMAN Isoform 4 of Eyes absent homolog 3 OS=Homo sapiens GN=EYA3;sp|Q99504-5|E	86796000	0	7916700	5919600	5424800	0	494790	48394000	0	16942000	2	2	2	7.5	7.5	7.5	45.549	0.00017581	3.4009	94713000	4	6	2	0	1	2	0	1	2	0	1	7.5	0	4.8	3	0	1
316	E9PME6;B1AQP1;P22415-2;P22415	E9PME6;B1AQP1;P22415-2;P22415	Upstream stimulatory factor 1	USF1	tr|E9PME6|E9PME6_HUMAN Upstream stimulatory factor 1 (Fragment) OS=Homo sapiens GN=USF1 PE=4 SV=3;tr|B1AQP1|B1AQP1_HUMAN Upstream stimulatory factor 1 OS=Homo sapiens GN=USF1 PE=4 SV=1;sp|P22415-2|USF1_HUMAN Isoform 2 of Upstream stimulatory factor 1 OS=Ho	51297000	8893400	0	7523800	6412200	1111700	0	0	19088000	0	2	2	1	13.3	13.3	8.7	24.126	0	6.3743	60191000	2	4	1	1	0	1	1	0	0	1	0	4.6	8.7	0	1	1	0
317	B1AVT0;P49760-3;P49760	B1AVT0;P49760-3;P49760	Dual specificity protein kinase CLK2	CLK2	tr|B1AVT0|B1AVT0_HUMAN Dual-specificity protein kinase CLK2 OS=Homo sapiens GN=CLK2 PE=1 SV=1;sp|P49760-3|CLK2_HUMAN Isoform 3 of Dual specificity protein kinase CLK2 OS=Homo sapiens GN=CLK2;sp|P49760|CLK2_HUMAN Dual specificity protein kinase CLK2 OS=Homo	32977000	0	0	1319100	1319100	0	0	23422000	0	0	1	1	1	2.8	2.8	2.8	59.874	0.00050226	2.6215	32977000	1	3	1	0	0	1	0	0	1	0	0	2.8	0	0	1	0	0
318	B1AVU8;P07602;C9JIZ6;P07602-2;P07602-3;Q5BJH1	B1AVU8;P07602;C9JIZ6;P07602-2;P07602-3;Q5BJH1	Prosaposin;Saposin-A;Saposin-B-Val;Saposin-B;Saposin-C;Saposin-D	PSAP	tr|B1AVU8|B1AVU8_HUMAN Saposin-D OS=Homo sapiens GN=PSAP PE=1 SV=1;sp|P07602|SAP_HUMAN Prosaposin OS=Homo sapiens GN=PSAP PE=1 SV=2;tr|C9JIZ6|C9JIZ6_HUMAN Prosaposin OS=Homo sapiens GN=PSAP PE=1 SV=2;sp|P07602-2|SAP_HUMAN Isoform Sap-mu-6 of Prosaposin OS=	13259000000	4690000000	12482000000	895040000	389980000	137940000	367120000	12142000000	9762600000	11740000000	23	23	23	46	46	46	61.692	0	115.41	30431000000	175	6	20	18	22	20	18	22	20	18	22	39.2	38.3	44.4	52	56	67
319	H3BS66;B2RUZ4	H3BS66;B2RUZ4	Small integral membrane protein 1	SMIM1	tr|H3BS66|H3BS66_HUMAN Small integral membrane protein 1 OS=Homo sapiens GN=SMIM1 PE=1 SV=1;sp|B2RUZ4|SMIM1_HUMAN Small integral membrane protein 1 OS=Homo sapiens GN=SMIM1 PE=1 SV=1	372860000	177930000	381980000	310920000	124290000	59311000	127330000	399500000	460340000	370350000	3	3	3	91.9	91.9	91.9	4.1915	0	43.131	932770000	11	2	3	3	2	3	3	2	3	3	2	91.9	91.9	75.7	4	3	4
320	B2WTI3;B2WTI4;K7EJU9;Q6NYC1-2;Q6NYC1;Q6NYC1-3	B2WTI3;B2WTI4;K7EJU9;Q6NYC1-2;Q6NYC1;Q6NYC1-3	Bifunctional arginine demethylase and lysyl-hydroxylase JMJD6	JMJD6	tr|B2WTI3|B2WTI3_HUMAN Bifunctional arginine demethylase and lysyl-hydroxylase JMJD6 OS=Homo sapiens GN=JMJD6 PE=1 SV=1;tr|B2WTI4|B2WTI4_HUMAN Bifunctional arginine demethylase and lysyl-hydroxylase JMJD6 OS=Homo sapiens GN=JMJD6 PE=1 SV=1;tr|K7EJU9|K7EJU9	157030000	0	70750000	13399000	9237300	0	4161800	106610000	0	100760000	6	6	6	23.9	23.9	23.9	39.241	0	12.546	227780000	8	6	5	0	3	5	0	3	5	0	3	17.3	0	13.7	5	0	3
321	B3KPJ4;Q8IXK0-2;Q8IXK0-4;Q8IXK0;Q8IXK0-5;Q8IXK0-3	B3KPJ4;Q8IXK0-2;Q8IXK0-4;Q8IXK0;Q8IXK0-5;Q8IXK0-3	Polyhomeotic-like protein 2	PHC2	tr|B3KPJ4|B3KPJ4_HUMAN Polyhomeotic-like protein 2 OS=Homo sapiens GN=PHC2 PE=1 SV=1;sp|Q8IXK0-2|PHC2_HUMAN Isoform 2 of Polyhomeotic-like protein 2 OS=Homo sapiens GN=PHC2;sp|Q8IXK0-4|PHC2_HUMAN Isoform 4 of Polyhomeotic-like protein 2 OS=Homo sapiens GN=	429610000	300070000	636050000	50583000	15912000	11114000	23557000	628190000	623010000	530710000	6	6	5	19.2	19.2	16.4	50.403	0	16.613	1365700000	9	6	4	2	5	4	2	5	3	2	4	11.2	5.2	15.7	5	1	3
322	B3KRD1;B7Z4D2;Q9NX95-5;Q9NX95-2;Q9NX95-4;Q9NX95-3;Q9NX95	B3KRD1;B7Z4D2;Q9NX95-5;Q9NX95-2;Q9NX95-4;Q9NX95-3;Q9NX95	Syntabulin	SYBU	tr|B3KRD1|B3KRD1_HUMAN Syntabulin OS=Homo sapiens GN=SYBU PE=2 SV=1;tr|B7Z4D2|B7Z4D2_HUMAN Syntabulin OS=Homo sapiens GN=SYBU PE=2 SV=1;sp|Q9NX95-5|SYBU_HUMAN Isoform 5 of Syntabulin OS=Homo sapiens GN=SYBU;sp|Q9NX95-2|SYBU_HUMAN Isoform 2 of Syntabulin OS	60653000	0	11320000	3598700	3032600	0	566020	42785000	0	14808000	2	2	2	8.1	8.1	8.1	50.463	0.00050522	2.7167	71973000	3	7	2	0	1	2	0	1	2	0	1	8.1	0	5	2	0	1
323	B3KS98;O15372;A0A087WZK9;E5RJT0;E5RGU4;E5RFW7;E5RFH0;E5RHC7;E5RH59	B3KS98;O15372;A0A087WZK9;E5RJT0	Eukaryotic translation initiation factor 3 subunit H	EIF3H	tr|B3KS98|B3KS98_HUMAN Eukaryotic translation initiation factor 3 subunit H OS=Homo sapiens GN=EIF3H PE=1 SV=1;sp|O15372|EIF3H_HUMAN Eukaryotic translation initiation factor 3 subunit H OS=Homo sapiens GN=EIF3H PE=1 SV=1;tr|A0A087WZK9|A0A087WZK9_HUMAN Euka	1388300000	257430000	1132200000	115750000	57845000	10726000	47177000	992890000	738970000	1241300000	15	15	15	52.5	52.5	52.5	41.581	0	69.953	2778000000	39	9	13	7	10	13	7	10	13	7	10	49.5	25.1	44.3	18	10	11
324	B3KT28;Q9UNN5;B1ANM7;Q9UNN5-2	B3KT28;Q9UNN5	FAS-associated factor 1	FAF1	tr|B3KT28|B3KT28_HUMAN FAS-associated factor 1 OS=Homo sapiens GN=FAF1 PE=1 SV=1;sp|Q9UNN5|FAF1_HUMAN FAS-associated factor 1 OS=Homo sapiens GN=FAF1 PE=1 SV=2	44677000	0	0	1718400	1718400	0	0	36116000	0	0	3	3	3	8.6	8.6	8.6	53.653	0.00017828	3.6795	44677000	1	4	3	0	0	3	0	0	3	0	0	8.6	0	0	1	0	0
325	B3KT51;Q9BRN9-2;Q9BRN9;H0YNF6;E7EPS7;H0YNS4	B3KT51;Q9BRN9-2;Q9BRN9;H0YNF6;E7EPS7;H0YNS4	TM2 domain-containing protein 3	TM2D3	tr|B3KT51|B3KT51_HUMAN TM2 domain containing 3, isoform CRA_a OS=Homo sapiens GN=TM2D3 PE=2 SV=1;sp|Q9BRN9-2|TM2D3_HUMAN Isoform 2 of TM2 domain-containing protein 3 OS=Homo sapiens GN=TM2D3;sp|Q9BRN9|TM2D3_HUMAN TM2 domain-containing protein 3 OS=Homo sap	12813000	14325000	0	2467100	1164800	1302300	0	0	39945000	0	2	2	2	9.9	9.9	9.9	20.207	0.0094398	1.427	27138000	2	6	1	1	0	1	1	0	1	1	0	6	3.8	0	1	1	0
326	F8W7U8;P49959;B3KTC7;P49959-2;F5GXT0;F5H742;F5H256	F8W7U8;P49959;B3KTC7;P49959-2	Double-strand break repair protein MRE11A	MRE11A	tr|F8W7U8|F8W7U8_HUMAN Double-strand break repair protein MRE11A OS=Homo sapiens GN=MRE11A PE=1 SV=1;sp|P49959|MRE11_HUMAN Double-strand break repair protein MRE11A OS=Homo sapiens GN=MRE11A PE=1 SV=3;tr|B3KTC7|B3KTC7_HUMAN Double-strand break repair prote	745880000	72628000	471470000	33076000	19125000	1862300	12089000	402550000	308630000	426040000	14	14	14	27.3	27.3	27.3	80.521	0	46.483	1290000000	25	7	12	4	7	12	4	7	12	4	7	21.9	8.8	15.3	13	4	8
327	B3KTM8;Q9UBU8-2;Q9UBU8;H0YLJ3;Q9UBU8-3;H0YMJ0;H0YM21;H0YMT8;H0YNE0;H0YLV1	B3KTM8;Q9UBU8-2;Q9UBU8;H0YLJ3;Q9UBU8-3;H0YMJ0	Mortality factor 4-like protein 1	MORF4L1	tr|B3KTM8|B3KTM8_HUMAN Mortality factor 4-like protein 1 OS=Homo sapiens GN=MORF4L1 PE=1 SV=1;sp|Q9UBU8-2|MO4L1_HUMAN Isoform 2 of Mortality factor 4-like protein 1 OS=Homo sapiens GN=MORF4L1;sp|Q9UBU8|MO4L1_HUMAN Mortality factor 4-like protein 1 OS=Homo	742040000	110400000	316150000	50808000	32263000	4799800	13746000	626980000	260770000	373100000	9	9	7	38.8	38.8	31.6	40.028	0	39.299	1168600000	18	10	7	3	4	7	3	4	6	2	4	27	12.9	20.1	9	3	6
328	B3KUS5;Q70CQ3;F5H8D3;F5H3L3;S4R3D1;F5GXG2	B3KUS5;Q70CQ3;F5H8D3	Ubiquitin carboxyl-terminal hydrolase;Ubiquitin carboxyl-terminal hydrolase 30	USP30	tr|B3KUS5|B3KUS5_HUMAN Ubiquitin carboxyl-terminal hydrolase OS=Homo sapiens GN=USP30 PE=2 SV=1;sp|Q70CQ3|UBP30_HUMAN Ubiquitin carboxyl-terminal hydrolase 30 OS=Homo sapiens GN=USP30 PE=1 SV=1;tr|F5H8D3|F5H8D3_HUMAN Ubiquitin carboxyl-terminal hydrolase 3	277840000	11249000	134320000	17642000	11577000	468720	5596700	217610000	40156000	86008000	6	6	6	18.5	18.5	18.5	55.108	0	16.448	423410000	11	6	4	1	4	4	1	4	4	1	4	14.6	4.7	11.5	6	1	4
329	B3KVK2	B3KVK2		GNB1	tr|B3KVK2|B3KVK2_HUMAN Guanine nucleotide-binding protein G(I)/G(S)/G(T) subunit beta-1 OS=Homo sapiens GN=GNB1 PE=1 SV=1	28053000	0	10960000	5573300	4007600	0	1565700	23226000	0	12027000	8	1	1	65.8	10.8	10.8	25.935	0.001786	2.143	39013000	2	1	7	7	7	1	0	1	1	0	1	61.7	55	61.7	1	0	1
330	B3KVL5;Q8TBK6-2;Q8TBK6	B3KVL5;Q8TBK6-2;Q8TBK6	Zinc finger CCHC domain-containing protein 10	ZCCHC10	tr|B3KVL5|B3KVL5_HUMAN Zinc finger CCHC domain-containing protein 10 OS=Homo sapiens GN=ZCCHC10 PE=2 SV=1;sp|Q8TBK6-2|ZCH10_HUMAN Isoform 2 of Zinc finger CCHC domain-containing protein 10 OS=Homo sapiens GN=ZCCHC10;sp|Q8TBK6|ZCH10_HUMAN Zinc finger CCHC d	185860000	58975000	163620000	81692000	37172000	11795000	32724000	212810000	143430000	126310000	1	1	1	7.5	7.5	7.5	20.308	0	15.114	408460000	5	3	1	1	1	1	1	1	1	1	1	7.5	7.5	7.5	1	2	2
331	B3KVN2;P49354-2;P49354;E9PPM9;H0YCW1;E9PQP6	B3KVN2;P49354-2;P49354;E9PPM9;H0YCW1;E9PQP6	Protein farnesyltransferase/geranylgeranyltransferase type-1 subunit alpha	FNTA	tr|B3KVN2|B3KVN2_HUMAN Farnesyltransferase, CAAX box, alpha, isoform CRA_c OS=Homo sapiens GN=FNTA PE=1 SV=1;sp|P49354-2|FNTA_HUMAN Isoform 2 of Protein farnesyltransferase/geranylgeranyltransferase type-1 subunit alpha OS=Homo sapiens GN=FNTA;sp|P49354|FN	0	21892000	6099200	1866100	0	1459500	406610	0	45035000	17013000	3	3	3	16.7	16.7	16.7	27.443	0.0046171	1.7936	27991000	4	6	0	3	1	0	3	1	0	3	1	0	16.7	3.1	0	3	1
332	B3KVZ3;Q9H3R5;D6RBJ6	B3KVZ3;Q9H3R5;D6RBJ6	Centromere protein H	CENPH	tr|B3KVZ3|B3KVZ3_HUMAN Centromere protein H OS=Homo sapiens GN=CENPH PE=1 SV=1;sp|Q9H3R5|CENPH_HUMAN Centromere protein H OS=Homo sapiens GN=CENPH PE=1 SV=1;tr|D6RBJ6|D6RBJ6_HUMAN Centromere protein H OS=Homo sapiens GN=CENPH PE=1 SV=1	33848000	62617000	0	5359200	1880400	3478700	0	56339000	129910000	0	2	2	2	13.2	13.2	13.2	26.239	0	9.8205	96465000	3	3	1	2	0	1	2	0	1	2	0	7.9	13.2	0	1	2	0
333	B3KW44;E7ETE0;H7C2P8;B5ME25;Q9H825-2;Q9H825;C9JE69	B3KW44;E7ETE0;H7C2P8;B5ME25;Q9H825-2;Q9H825	Methyltransferase-like protein 8	METTL8	tr|B3KW44|B3KW44_HUMAN Methyltransferase-like protein 8 OS=Homo sapiens GN=METTL8 PE=1 SV=1;tr|E7ETE0|E7ETE0_HUMAN Methyltransferase-like protein 8 OS=Homo sapiens GN=METTL8 PE=4 SV=2;tr|H7C2P8|H7C2P8_HUMAN Methyltransferase-like protein 8 (Fragment) OS=Ho	230630000	84328000	257130000	22004000	8870500	3243400	9889800	187530000	0	267800000	7	7	7	20.1	20.1	20.1	46.992	0	15.174	572090000	11	7	5	2	4	5	2	4	5	2	4	15.5	6.6	13.3	5	2	4
334	B3KXX3;Q9UHW9-6;Q9UHW9-5;Q9UHW9-2;Q9UHW9-3;Q9UHW9-4;Q9UHW9;H0YKQ8;H0YMQ9;H0YNJ5;J3QSF2;H0YKE6	B3KXX3;Q9UHW9-6;Q9UHW9-5;Q9UHW9-2;Q9UHW9-3;Q9UHW9-4;Q9UHW9;H0YKQ8;H0YMQ9	Solute carrier family 12 member 6	SLC12A6	tr|B3KXX3|B3KXX3_HUMAN Solute carrier family 12 member 6 OS=Homo sapiens GN=SLC12A6 PE=1 SV=1;sp|Q9UHW9-6|S12A6_HUMAN Isoform 6 of Solute carrier family 12 member 6 OS=Homo sapiens GN=SLC12A6;sp|Q9UHW9-5|S12A6_HUMAN Isoform 5 of Solute carrier family 12 me	359150000	43740000	358000000	16909000	7981100	972010	7955500	272820000	99655000	409560000	17	10	10	19.5	13.4	13.4	106.94	0	23.692	760890000	12	12	12	6	10	6	2	5	6	2	5	13.9	6.1	11	5	1	6
335	B4DDF4;B4DUT8;Q99439;A0A087X271;A0A087X1X5;Q99439-2;H3BVI6;K7ES69;H3BQH0;U3KPS3;A0A087WV51	B4DDF4;B4DUT8;Q99439;A0A087X271;A0A087X1X5;Q99439-2;H3BVI6	Calponin;Calponin-2	CNN2	tr|B4DDF4|B4DDF4_HUMAN Calponin OS=Homo sapiens GN=CNN2 PE=1 SV=1;tr|B4DUT8|B4DUT8_HUMAN Calponin OS=Homo sapiens GN=CNN2 PE=1 SV=1;sp|Q99439|CNN2_HUMAN Calponin-2 OS=Homo sapiens GN=CNN2 PE=1 SV=4;tr|A0A087X271|A0A087X271_HUMAN Calponin-2 (Fragment) OS=Ho	555830000	56132000	389450000	58907000	32696000	3301900	22909000	442170000	167910000	421420000	8	7	7	38.6	34.9	34.9	32.616	0	20.759	1001400000	14	11	5	3	6	5	2	6	5	2	6	23.8	13.8	31.2	6	2	6
336	F8WEE4;B8ZZ56;E7EV05;E9PFU9;B4DEN4;Q8WV99-2;Q8WV99;C9J1R6;A0A087X0D9	F8WEE4;B8ZZ56;E7EV05;E9PFU9;B4DEN4;Q8WV99-2;Q8WV99;C9J1R6;A0A087X0D9	AN1-type zinc finger protein 2B	ZFAND2B	tr|F8WEE4|F8WEE4_HUMAN AN1-type zinc finger protein 2B OS=Homo sapiens GN=ZFAND2B PE=4 SV=1;tr|B8ZZ56|B8ZZ56_HUMAN AN1-type zinc finger protein 2B OS=Homo sapiens GN=ZFAND2B PE=4 SV=1;tr|E7EV05|E7EV05_HUMAN AN1-type zinc finger protein 2B (Fragment) OS=Hom	34906000	0	0	4986600	4986600	0	0	33360000	0	0	2	2	2	26	26	26	10.578	0	7.011	34906000	2	9	2	0	0	2	0	0	2	0	0	26	0	0	2	0	0
337	B4DGM3;Q969G3-2;Q969G3;J3QKS7;Q969G3-6;Q969G3-5;Q969G3-3;Q969G3-4;K7EMQ8;H7C048;J3QR61;J3KT85;J3QKX6;J3KS99;J3QL66	B4DGM3;Q969G3-2;Q969G3;J3QKS7;Q969G3-6;Q969G3-5;Q969G3-3;Q969G3-4;K7EMQ8;H7C048	SWI/SNF-related matrix-associated actin-dependent regulator of chromatin subfamily E member 1	SMARCE1	tr|B4DGM3|B4DGM3_HUMAN SWI/SNF-related matrix-associated actin-dependent regulator of chromatin subfamily E member 1 OS=Homo sapiens GN=SMARCE1 PE=1 SV=1;sp|Q969G3-2|SMCE1_HUMAN Isoform 2 of SWI/SNF-related matrix-associated actin-dependent regulator of ch	1600700000	607350000	1086000000	137250000	66695000	25306000	45249000	1255900000	1430500000	1209700000	14	13	13	42.2	40.5	40.5	44.77	0	125.18	3294000000	44	15	12	9	9	11	8	8	11	8	8	39.2	28.2	31.6	16	12	16
338	H7C5F7;B4DGY6;Q9NV92	H7C5F7;B4DGY6;Q9NV92	NEDD4 family-interacting protein 2	NDFIP2	tr|H7C5F7|H7C5F7_HUMAN NEDD4 family-interacting protein 2 OS=Homo sapiens GN=NDFIP2 PE=4 SV=2;tr|B4DGY6|B4DGY6_HUMAN NEDD4 family-interacting protein 2 OS=Homo sapiens GN=NDFIP2 PE=2 SV=1;sp|Q9NV92|NFIP2_HUMAN NEDD4 family-interacting protein 2 OS=Homo sap	22042000	15912000	0	7590800	4408300	3182400	0	22042000	33426000	0	1	1	1	13	13	13	15.727	0.0044657	1.8251	37954000	2	3	1	1	0	1	1	0	1	1	0	13	13	0	1	1	0
339	B4DHE8;Q96DH6-2;Q96DH6;J3KTC1;B4DM51;Q96DH6-3;J3QKT5;H0YHB7;O43347	B4DHE8;Q96DH6-2;Q96DH6;J3KTC1;B4DM51;Q96DH6-3	RNA-binding protein Musashi homolog 2	MSI2	tr|B4DHE8|B4DHE8_HUMAN RNA-binding protein Musashi homolog 2 OS=Homo sapiens GN=MSI2 PE=2 SV=1;sp|Q96DH6-2|MSI2H_HUMAN Isoform 2 of RNA-binding protein Musashi homolog 2 OS=Homo sapiens GN=MSI2;sp|Q96DH6|MSI2H_HUMAN RNA-binding protein Musashi homolog 2 OS	789470000	212040000	545590000	128930000	65789000	17670000	45466000	647820000	589180000	479070000	8	8	8	36.4	36.4	36.4	34.812	0	45.402	1547100000	23	9	7	5	4	7	5	4	7	5	4	32.7	22.8	17.3	10	7	6
340	B4DI03;K7EJQ7;Q9BY50	B4DI03;K7EJQ7;Q9BY50	Signal peptidase complex catalytic subunit SEC11;Signal peptidase complex catalytic subunit SEC11C	SEC11L3;SEC11C	tr|B4DI03|B4DI03_HUMAN SEC11-like 3 (S. cerevisiae), isoform CRA_a OS=Homo sapiens GN=SEC11L3 PE=1 SV=1;tr|K7EJQ7|K7EJQ7_HUMAN Signal peptidase complex catalytic subunit SEC11C OS=Homo sapiens GN=SEC11C PE=1 SV=1;sp|Q9BY50|SC11C_HUMAN Signal peptidase comp	2029800000	613250000	1906900000	505560000	225540000	68139000	211880000	1978000000	1498300000	1770300000	8	8	8	54.5	54.5	54.5	17.404	0	40.672	4550000000	38	3	8	5	7	8	5	7	8	5	7	54.5	30.1	49.4	15	9	14
341	H3BRY6;B4DVT3;B4DJL6;Q96SY0-4;Q96SY0-3;Q96SY0	H3BRY6;B4DVT3;B4DJL6;Q96SY0-4;Q96SY0-3;Q96SY0	von Willebrand factor A domain-containing protein 9	VWA9	tr|H3BRY6|H3BRY6_HUMAN von Willebrand factor A domain-containing protein 9 OS=Homo sapiens GN=VWA9 PE=1 SV=1;tr|B4DVT3|B4DVT3_HUMAN cDNA FLJ50705 OS=Homo sapiens GN=VWA9 PE=1 SV=1;tr|B4DJL6|B4DJL6_HUMAN cDNA FLJ55475 OS=Homo sapiens GN=VWA9 PE=1 SV=1;sp|Q9	179750000	27391000	71884000	10732000	6913600	1053500	2764800	99122000	0	98797000	8	8	8	27.1	27.1	27.1	51.583	0	10.26	279030000	11	6	5	2	4	5	2	4	5	2	4	17.1	8.3	10.3	4	2	5
342	B4DJV2;O75390;H0YIC4;F8VRI6;F8VPA1;F8VR34;H0YH82;F8VPF9;F8VTT8;F8W1S4;F8W4S1;F8VRP1;F8VX68;F8W642;F8VZK9;F8VX07;F8VWQ5;F8VU34	B4DJV2;O75390	Citrate synthase;Citrate synthase, mitochondrial	CS	tr|B4DJV2|B4DJV2_HUMAN Citrate synthase OS=Homo sapiens GN=CS PE=1 SV=1;sp|O75390|CISY_HUMAN Citrate synthase, mitochondrial OS=Homo sapiens GN=CS PE=1 SV=2	48702000000	22566000000	54152000000	6601000000	2563200000	1187700000	2850100000	44037000000	47689000000	49622000000	22	22	21	51.9	51.9	49.9	50.431	0	323.31	125420000000	330	18	21	17	20	21	17	20	20	16	19	51.9	39.5	48.1	98	113	119
343	B4DKB2;P42892-3;P42892-4;P42892;P42892-2;E9PN99;E9PHZ1	B4DKB2;P42892-3;P42892-4;P42892;P42892-2	Endothelin-converting enzyme 1	ECE1	tr|B4DKB2|B4DKB2_HUMAN Endothelin-converting enzyme 1 OS=Homo sapiens GN=ECE1 PE=1 SV=1;sp|P42892-3|ECE1_HUMAN Isoform C of Endothelin-converting enzyme 1 OS=Homo sapiens GN=ECE1;sp|P42892-4|ECE1_HUMAN Isoform D of Endothelin-converting enzyme 1 OS=Homo sa	532750000	150900000	302290000	22929000	12389000	3509200	7029900	406120000	372240000	286570000	12	12	12	24.8	24.8	24.8	83.573	0	37.753	985930000	23	7	10	4	4	10	4	4	10	4	4	18.8	8.8	8.8	12	6	5
344	B4DKY1;P49589-2;P49589;P49589-3;C9JLN0;E9PRS8;E9PLP0	B4DKY1;P49589-2;P49589;P49589-3	Cysteine--tRNA ligase, cytoplasmic	CARS	tr|B4DKY1|B4DKY1_HUMAN Cysteine--tRNA ligase, cytoplasmic OS=Homo sapiens GN=CARS PE=2 SV=1;sp|P49589-2|SYCC_HUMAN Isoform 2 of Cysteine--tRNA ligase, cytoplasmic OS=Homo sapiens GN=CARS;sp|P49589|SYCC_HUMAN Cysteine--tRNA ligase, cytoplasmic OS=Homo sapie	274330000	31573000	97189000	9597400	6531600	751740	2314000	160320000	0	164170000	13	13	13	20.8	20.8	20.8	84.277	0	14.864	403090000	15	7	10	2	4	10	2	4	10	2	4	18.3	3	7	9	2	4
345	B4DLN1;I3L1E8;F6QW41	B4DLN1			tr|B4DLN1|B4DLN1_HUMAN Mitochondrial dicarboxylate carrier OS=Homo sapiens GN=SLC25A10 PE=2 SV=1	41464000000	19365000000	41756000000	4103400000	1658600000	774620000	1670200000	37566000000	39145000000	38371000000	22	22	0	61.3	61.3	0	48.099	0	276.76	102590000000	318	3	21	18	20	21	18	20	0	0	0	55.9	50.7	56.1	95	104	119
346	H3BTT2;H3BUN7;B4DLN5;F5GXU7;Q9NRF2-2;Q9NRF2-3;Q9NRF2	H3BTT2;H3BUN7;B4DLN5;F5GXU7;Q9NRF2-2;Q9NRF2-3;Q9NRF2	SH2B adapter protein 1	SH2B1	tr|H3BTT2|H3BTT2_HUMAN SH2B adapter protein 1 (Fragment) OS=Homo sapiens GN=SH2B1 PE=4 SV=1;tr|H3BUN7|H3BUN7_HUMAN SH2B adapter protein 1 (Fragment) OS=Homo sapiens GN=SH2B1 PE=4 SV=1;tr|B4DLN5|B4DLN5_HUMAN SH2B adapter protein 1 OS=Homo sapiens GN=SH2B1 P	14670000	0	0	1833800	1833800	0	0	8439500	0	0	1	1	1	21.9	21.9	21.9	12.706	0	5.7061	14670000	1	7	1	0	0	1	0	0	1	0	0	21.9	0	0	1	0	0
347	B4DMI0;Q8WUF8-4;Q8WUF8-3;Q8WUF8;E9PBM2	B4DMI0;Q8WUF8-4;Q8WUF8-3;Q8WUF8;E9PBM2	Protein FAM172A	FAM172A	tr|B4DMI0|B4DMI0_HUMAN Protein FAM172A OS=Homo sapiens GN=FAM172A PE=2 SV=1;sp|Q8WUF8-4|F172A_HUMAN Isoform 4 of Protein FAM172A OS=Homo sapiens GN=FAM172A;sp|Q8WUF8-3|F172A_HUMAN Isoform 3 of Protein FAM172A OS=Homo sapiens GN=FAM172A;sp|Q8WUF8|F172A_HUMA	44023000	0	20292000	5359700	3668600	0	1691000	17674000	0	26778000	2	2	2	11.2	11.2	11.2	31.371	0	6.0283	64316000	3	5	2	0	1	2	0	1	2	0	1	11.2	0	3.7	2	0	1
348	H0Y4S7;B4DML5;G3XAG9;Q9BYM8-4;Q9BYM8-3;Q9BYM8	H0Y4S7;B4DML5;G3XAG9;Q9BYM8-4;Q9BYM8-3;Q9BYM8	RanBP-type and C3HC4-type zinc finger-containing protein 1	RBCK1	tr|H0Y4S7|H0Y4S7_HUMAN RanBP-type and C3HC4-type zinc finger-containing protein 1 (Fragment) OS=Homo sapiens GN=RBCK1 PE=4 SV=1;tr|B4DML5|B4DML5_HUMAN RanBP-type and C3HC4-type zinc finger-containing protein 1 OS=Homo sapiens GN=RBCK1 PE=1 SV=1;tr|G3XAG9|G	18749000	0	0	1102900	1102900	0	0	17253000	0	0	1	1	1	7.1	7.1	7.1	28.306	0.0046223	1.8054	18749000	1	6	1	0	0	1	0	0	1	0	0	7.1	0	0	1	0	0
349	B4DPR9;Q99551	B4DPR9;Q99551	Transcription termination factor 1, mitochondrial	MTERF1	tr|B4DPR9|B4DPR9_HUMAN Transcription termination factor 1, mitochondrial OS=Homo sapiens GN=MTERF1 PE=2 SV=1;sp|Q99551|MTEF1_HUMAN Transcription termination factor 1, mitochondrial OS=Homo sapiens GN=MTERF1 PE=1 SV=1	34484000	17128000	24873000	2832800	1277200	634390	921200	39233000	37078000	31052000	1	1	1	3.7	3.7	3.7	43.641	0.00034513	3.0544	76485000	3	2	1	1	1	1	1	1	1	1	1	3.7	3.7	3.7	1	1	1
350	B4DQI6;Q13595-3;Q13595;Q13595-2	B4DQI6;Q13595-3;Q13595;Q13595-2	Transformer-2 protein homolog alpha	TRA2A	tr|B4DQI6|B4DQI6_HUMAN Transformer-2 protein homolog alpha OS=Homo sapiens GN=TRA2A PE=1 SV=1;sp|Q13595-3|TRA2A_HUMAN Isoform 3 of Transformer-2 protein homolog alpha OS=Homo sapiens GN=TRA2A;sp|Q13595|TRA2A_HUMAN Transformer-2 protein homolog alpha OS=Hom	3475400000	1046300000	2232200000	675390000	347540000	104630000	223220000	2873600000	2247500000	1791200000	8	6	6	50	40	40	20.589	0	50.244	6753900000	43	4	6	7	6	5	6	5	5	6	5	41.1	45	41.1	17	15	11
351	D6RIB6;B4DQT1;B4DVN3;E7ESC7;Q7L5Y9-4;Q7L5Y9-3;Q7L5Y9-2;Q7L5Y9;D6RA86;D6RID6;D6RE80;D6RDW4;D6REW7;Q7L5Y9-5	D6RIB6;B4DQT1;B4DVN3;E7ESC7;Q7L5Y9-4;Q7L5Y9-3;Q7L5Y9-2;Q7L5Y9;D6RA86;D6RID6;D6RE80;D6RDW4;D6REW7;Q7L5Y9-5	Macrophage erythroblast attacher	MAEA	tr|D6RIB6|D6RIB6_HUMAN Macrophage erythroblast attacher OS=Homo sapiens GN=MAEA PE=1 SV=1;tr|B4DQT1|B4DQT1_HUMAN Macrophage erythroblast attacher OS=Homo sapiens GN=MAEA PE=1 SV=1;tr|B4DVN3|B4DVN3_HUMAN Macrophage erythroblast attacher OS=Homo sapiens GN=M	0	10195000	14384000	1229000	0	509740	719210	0	0	12676000	2	2	2	9.1	9.1	9.1	36.166	0.00066523	2.507	24579000	2	14	0	1	1	0	1	1	0	1	1	0	2.7	6.4	0	1	1
352	H0Y2Y8;B4DQX7;Q15942;H7C3D3;C9JJK5	H0Y2Y8;B4DQX7;Q15942;H7C3D3	Zyxin	ZYX	tr|H0Y2Y8|H0Y2Y8_HUMAN Zyxin (Fragment) OS=Homo sapiens GN=ZYX PE=1 SV=1;tr|B4DQX7|B4DQX7_HUMAN Zyxin OS=Homo sapiens GN=ZYX PE=1 SV=1;sp|Q15942|ZYX_HUMAN Zyxin OS=Homo sapiens GN=ZYX PE=1 SV=1;tr|H7C3D3|H7C3D3_HUMAN Zyxin (Fragment) OS=Homo sapiens GN=ZYX	213170000	20120000	245830000	19165000	8526800	804820	9833200	165770000	0	232380000	8	8	8	28	28	28	57.643	0	33.08	479120000	14	5	4	1	6	4	1	6	4	1	6	16.3	2	22	5	1	8
353	B4DR61;P61619;P61619-3;H7C1Q9;H7C069;A6NK38;F2Z2C7;A6NIF9;C9JJV4	B4DR61;P61619;P61619-3	Protein transport protein Sec61 subunit alpha isoform 1	SEC61A1	tr|B4DR61|B4DR61_HUMAN Protein transport protein Sec61 subunit alpha isoform 1 OS=Homo sapiens GN=SEC61A1 PE=1 SV=1;sp|P61619|S61A1_HUMAN Protein transport protein Sec61 subunit alpha isoform 1 OS=Homo sapiens GN=SEC61A1 PE=1 SV=2;sp|P61619-3|S61A1_HUMAN I	17305000000	9191300000	18365000000	2361100000	910810000	483750000	966560000	16993000000	20668000000	16856000000	12	12	7	26.6	26.6	17.8	52.949	0	49.058	44861000000	84	9	11	8	10	11	8	10	7	4	6	25.1	17.4	22.2	22	31	31
354	E9PGC0;P20936-2;B4DTL2;P20936	E9PGC0;P20936-2;B4DTL2;P20936	Ras GTPase-activating protein 1	RASA1	tr|E9PGC0|E9PGC0_HUMAN Ras GTPase-activating protein 1 OS=Homo sapiens GN=RASA1 PE=1 SV=1;sp|P20936-2|RASA1_HUMAN Isoform 2 of Ras GTPase-activating protein 1 OS=Homo sapiens GN=RASA1;tr|B4DTL2|B4DTL2_HUMAN Ras GTPase-activating protein 1 OS=Homo sapiens G	109560000	0	0	1888900	1888900	0	0	90707000	0	0	1	1	1	1.6	1.6	1.6	101.79	0.00017671	3.5105	109560000	1	4	1	0	0	1	0	0	1	0	0	1.6	0	0	1	0	0
355	B4DTS2;Q9BZL6;Q8NCK8;M0QZ82;M0QXC6;M0R2Z8	B4DTS2;Q9BZL6;Q8NCK8	Serine/threonine-protein kinase;Serine/threonine-protein kinase D2	PRKD2	tr|B4DTS2|B4DTS2_HUMAN Serine/threonine-protein kinase D OS=Homo sapiens GN=PRKD2 PE=1 SV=1;sp|Q9BZL6|KPCD2_HUMAN Serine/threonine-protein kinase D2 OS=Homo sapiens GN=PRKD2 PE=1 SV=2;tr|Q8NCK8|Q8NCK8_HUMAN Serine/threonine-protein kinase D2 OS=Homo sapien	133810000	72326000	100520000	7863000	3431100	1854500	2577400	110590000	176750000	91513000	9	9	9	15.8	15.8	15.8	97.742	0	15.271	306660000	13	6	6	2	5	6	2	5	6	2	5	10.5	3.2	8.1	5	2	6
356	B4DTU4;P18858;M0R0Q7;F5GZ28;P18858-2;B4E135	B4DTU4;P18858;M0R0Q7;F5GZ28;P18858-2	DNA ligase 1;DNA ligase	LIG1	tr|B4DTU4|B4DTU4_HUMAN DNA ligase OS=Homo sapiens GN=LIG1 PE=1 SV=1;sp|P18858|DNLI1_HUMAN DNA ligase 1 OS=Homo sapiens GN=LIG1 PE=1 SV=1;tr|M0R0Q7|M0R0Q7_HUMAN DNA ligase OS=Homo sapiens GN=LIG1 PE=1 SV=1;tr|F5GZ28|F5GZ28_HUMAN DNA ligase OS=Homo sapiens G	126300000	17618000	64727000	3936800	2383100	332410	1221300	92767000	0	86218000	8	8	8	14.5	14.5	14.5	98.227	0	17.761	208650000	12	6	7	1	4	7	1	4	7	1	4	12.7	1.8	5.3	8	1	3
357	B4DUA7;Q9NX70;M0R0A0;M0R0U2;M0R3F3;Q9NX70-2	B4DUA7;Q9NX70;M0R0A0;M0R0U2;M0R3F3;Q9NX70-2	Mediator of RNA polymerase II transcription subunit 29	IXL;MED29	tr|B4DUA7|B4DUA7_HUMAN Intersex-like (Drosophila) OS=Homo sapiens GN=IXL PE=2 SV=1;sp|Q9NX70|MED29_HUMAN Mediator of RNA polymerase II transcription subunit 29 OS=Homo sapiens GN=MED29 PE=1 SV=1;tr|M0R0A0|M0R0A0_HUMAN Mediator of RNA polymerase II transcri	0	19425000	2653900	1839900	0	1618800	221160	0	47277000	0	2	2	2	9.5	9.5	9.5	23.472	0.0022654	2.056	22079000	3	6	0	1	1	0	1	1	0	1	1	0	6.3	3.2	0	2	1
358	B4DUC8;Q13126-4;Q13126;Q13126-3;Q13126-2;J3QSB7;Q13126-7;Q13126-6;Q13126-5;F8WES2;J3KRN1;F2Z2F3	B4DUC8;Q13126-4;Q13126;Q13126-3;Q13126-2;J3QSB7;Q13126-7;Q13126-6;Q13126-5	S-methyl-5-thioadenosine phosphorylase;Purine nucleoside phosphorylase	MTAP	tr|B4DUC8|B4DUC8_HUMAN S-methyl-5-thioadenosine phosphorylase OS=Homo sapiens GN=MTAP PE=1 SV=1;sp|Q13126-4|MTAP_HUMAN Isoform 4 of S-methyl-5-thioadenosine phosphorylase OS=Homo sapiens GN=MTAP;sp|Q13126|MTAP_HUMAN S-methyl-5-thioadenosine phosphorylas	154820000	0	278710000	21676000	7741000	0	13935000	191190000	0	208010000	4	4	4	24.7	24.7	24.7	33.186	0	18.693	433530000	5	12	2	0	3	2	0	3	2	0	3	12.3	0	18.7	2	0	3
359	C9JEN3;C9IYT2;F8WDY4;C9IZ27;C9JW19;C9JWV9;B4DUD2;Q969X1;C9JAP5;C9JM62;C9JAK9;C9JN47;C9JI44;C9JDV0	C9JEN3;C9IYT2;F8WDY4;C9IZ27;C9JW19;C9JWV9;B4DUD2;Q969X1;C9JAP5	Protein lifeguard 3	TMBIM1	tr|C9JEN3|C9JEN3_HUMAN Protein lifeguard 3 (Fragment) OS=Homo sapiens GN=TMBIM1 PE=1 SV=1;tr|C9IYT2|C9IYT2_HUMAN Protein lifeguard 3 (Fragment) OS=Homo sapiens GN=TMBIM1 PE=1 SV=1;tr|F8WDY4|F8WDY4_HUMAN Protein lifeguard 3 OS=Homo sapiens GN=TMBIM1 PE=1 SV	343340000	299910000	474010000	558630000	171670000	149950000	237000000	335500000	586870000	473040000	3	3	3	25.5	25.5	25.5	11.535	0	11.223	1117300000	14	14	1	3	2	1	3	2	1	3	2	13.2	25.5	14.2	3	7	4
360	B4DUX5;P50579;F8VRR3;F8VQZ7;P50579-2;G3V1U3;F8VSC4;F8VZX9;F8VY03	B4DUX5;P50579;F8VRR3;F8VQZ7;P50579-2;G3V1U3	Methionine aminopeptidase 2	METAP2	tr|B4DUX5|B4DUX5_HUMAN Methionine aminopeptidase 2 OS=Homo sapiens GN=METAP2 PE=1 SV=1;sp|P50579|MAP2_HUMAN Methionine aminopeptidase 2 OS=Homo sapiens GN=METAP2 PE=1 SV=1;tr|F8VRR3|F8VRR3_HUMAN Methionine aminopeptidase 2 OS=Homo sapiens GN=METAP2 PE=1 SV	521430000	183220000	411710000	38495000	17980000	6317900	14197000	461100000	359490000	443500000	8	8	8	21.3	21.3	21.3	50.496	0	37.306	1116400000	24	9	7	7	6	7	7	6	7	7	6	20.9	19.6	17.8	8	9	7
361	H0Y988;R4GNC0;B4DVL2;Q02083-2;Q02083	H0Y988;R4GNC0;B4DVL2;Q02083-2;Q02083	N-acylethanolamine-hydrolyzing acid amidase;N-acylethanolamine-hydrolyzing acid amidase subunit alpha;N-acylethanolamine-hydrolyzing acid amidase subunit beta	NAAA	tr|H0Y988|H0Y988_HUMAN N-acylethanolamine-hydrolyzing acid amidase (Fragment) OS=Homo sapiens GN=NAAA PE=4 SV=1;tr|R4GNC0|R4GNC0_HUMAN N-acylethanolamine-hydrolyzing acid amidase (Fragment) OS=Homo sapiens GN=NAAA PE=4 SV=1;tr|B4DVL2|B4DVL2_HUMAN N-acyleth	94929000	0	68193000	20390000	11866000	0	8524100	94902000	0	74310000	1	1	1	12.2	12.2	12.2	15.718	0	10.029	163120000	4	5	1	0	1	1	0	1	1	0	1	12.2	0	12.2	2	0	2
362	H3BPM8;Q13286-4;Q13286-2;B4DXL3;Q13286-3;Q13286;O95090;Q2TA70;B4DFF3;Q13286-6;Q9UBD8;H3BQ48;B4DMY6;Q13286-5;H3BPL0;H3BRU8;Q9UBH5;H3BNK7;H3BR84	H3BPM8;Q13286-4;Q13286-2;B4DXL3;Q13286-3;Q13286;O95090;Q2TA70;B4DFF3;Q13286-6;Q9UBD8;H3BQ48;B4DMY6;Q13286-5	Battenin	CLN3	tr|H3BPM8|H3BPM8_HUMAN Battenin OS=Homo sapiens GN=CLN3 PE=1 SV=1;sp|Q13286-4|CLN3_HUMAN Isoform 4 of Battenin OS=Homo sapiens GN=CLN3;sp|Q13286-2|CLN3_HUMAN Isoform 2 of Battenin OS=Homo sapiens GN=CLN3;tr|B4DXL3|B4DXL3_HUMAN Battenin OS=Homo sapiens GN=C	467990000	140830000	212380000	82120000	46799000	14083000	21238000	429140000	202900000	272740000	4	4	4	12.9	12.9	12.9	36.272	0	16.134	821200000	12	19	3	2	4	3	2	4	3	2	4	9.4	9.4	12.9	4	2	6
363	G3V4W0;B4DY08;P07910-2;G3V4C1;P07910-4;G3V251;G3V2D6;G3V5X6;G3V3K6;B4DSU6;G3V5V7;G3V4M8;P0DMR1;O60812;B7ZW38;B2RXH8;G3V2H6;E5RG71	G3V4W0;B4DY08;P07910-2;G3V4C1;P07910-4;G3V251;G3V2D6;G3V5X6;G3V3K6	Heterogeneous nuclear ribonucleoproteins C1/C2	HNRNPC	tr|G3V4W0|G3V4W0_HUMAN Heterogeneous nuclear ribonucleoproteins C1/C2 (Fragment) OS=Homo sapiens GN=HNRNPC PE=1 SV=1;tr|B4DY08|B4DY08_HUMAN Heterogeneous nuclear ribonucleoproteins C1/C2 OS=Homo sapiens GN=HNRNPC PE=1 SV=1;sp|P07910-2|HNRPC_HUMAN Isoform C	134010000000	67487000000	129550000000	16552000000	6700300000	3374300000	6477300000	107340000000	137830000000	125250000000	21	21	3	57.6	57.6	9.2	28.916	0	323.31	331040000000	896	18	18	17	16	18	17	16	3	1	2	50	53.1	51.5	253	383	260
364	B4DY26;P36897-3;P36897;P36897-2;F8W1R9;F8VXZ5;F8VRH6;F8VVC4;F8W0K6;H0YHS4	B4DY26;P36897-3;P36897;P36897-2;F8W1R9	Receptor protein serine/threonine kinase;TGF-beta receptor type-1	TGFBR1	tr|B4DY26|B4DY26_HUMAN TGF-beta receptor type-1 OS=Homo sapiens GN=TGFBR1 PE=1 SV=1;sp|P36897-3|TGFR1_HUMAN Isoform 3 of TGF-beta receptor type-1 OS=Homo sapiens GN=TGFBR1;sp|P36897|TGFR1_HUMAN TGF-beta receptor type-1 OS=Homo sapiens GN=TGFBR1 PE=1 SV=1;s	91510000	12191000	40709000	5157500	3268200	435390	1453900	46584000	69212000	43731000	3	3	3	8.8	8.8	8.8	48.875	0	6.4021	144410000	6	10	3	1	2	3	1	2	3	1	2	8.8	2.8	6.2	3	1	2
365	B4DYM4;Q9UBS9;Q9UBS9-2;A0A087WV04	B4DYM4;Q9UBS9;Q9UBS9-2	SUN domain-containing ossification factor	SUCO	tr|B4DYM4|B4DYM4_HUMAN SUN domain-containing ossification factor OS=Homo sapiens GN=SUCO PE=1 SV=1;sp|Q9UBS9|SUCO_HUMAN SUN domain-containing ossification factor OS=Homo sapiens GN=SUCO PE=1 SV=1;sp|Q9UBS9-2|SUCO_HUMAN Isoform 2 of SUN domain-containing os	67208000	0	0	1527500	1527500	0	0	52275000	0	0	4	4	4	7	7	7	98.283	0.00034465	3.0378	67208000	3	4	4	0	0	4	0	0	4	0	0	7	0	0	3	0	0
366	B4E0K5;Q16539;Q16539-3;Q16539-2;Q16539-5;Q16539-4;E7EX54;B5TY33;H7C4E2	B4E0K5;Q16539;Q16539-3;Q16539-2;Q16539-5;Q16539-4	Mitogen-activated protein kinase 14	MAPK14	tr|B4E0K5|B4E0K5_HUMAN Mitogen-activated protein kinase 14 OS=Homo sapiens GN=MAPK14 PE=1 SV=1;sp|Q16539|MK14_HUMAN Mitogen-activated protein kinase 14 OS=Homo sapiens GN=MAPK14 PE=1 SV=3;sp|Q16539-3|MK14_HUMAN Isoform Mxi2 of Mitogen-activated protein kin	104030000	0	47392000	10095000	6935300	0	3159400	79985000	0	41932000	5	5	5	28.6	28.6	28.6	32.357	0	13.892	151420000	8	9	3	0	3	3	0	3	3	0	3	14.8	0	20.8	4	0	4
367	B4E0T2;P50542-2;P50542-3;P50542;P50542-4;F5H432;F5GXX3;F5H205;F5H637;F5H3X7;J3KPV0	B4E0T2;P50542-2;P50542-3;P50542;P50542-4	Peroxisomal targeting signal 1 receptor	PEX5	tr|B4E0T2|B4E0T2_HUMAN Peroxisomal targeting signal 1 receptor OS=Homo sapiens GN=PEX5 PE=2 SV=1;sp|P50542-2|PEX5_HUMAN Isoform 2 of Peroxisomal targeting signal 1 receptor OS=Homo sapiens GN=PEX5;sp|P50542-3|PEX5_HUMAN Isoform 3 of Peroxisomal targeting s	116680000	0	85639000	5620100	3241200	0	2378900	77170000	0	92978000	4	4	4	9.7	9.7	9.7	73.182	0	7.081	202320000	5	11	4	0	2	4	0	2	4	0	2	9.7	0	3.6	3	0	2
368	Q8NBY1;B4E0Y9;Q9P289-2;Q9P289;Q9P289-3;C9JDH9;C9J6L2;C9JCC0;C9J232;H7C279;O00506-3;O00506-2;O00506;C9JJV0	Q8NBY1;B4E0Y9;Q9P289-2;Q9P289;Q9P289-3;C9JDH9;C9J6L2;C9JCC0;C9J232;H7C279;O00506-3;O00506-2;O00506	Serine/threonine-protein kinase 26;Serine/threonine-protein kinase 25	STK26;STK25	tr|Q8NBY1|Q8NBY1_HUMAN Serine/threonine-protein kinase MST4 OS=Homo sapiens GN=MST4 PE=2 SV=1;tr|B4E0Y9|B4E0Y9_HUMAN Serine/threonine-protein kinase MST4 OS=Homo sapiens GN=MST4 PE=2 SV=1;sp|Q9P289-2|STK26_HUMAN Isoform 2 of Serine/threonine-protein kinase	550900000	92472000	326100000	44067000	25041000	4203300	14823000	392270000	242200000	331640000	9	9	5	24.7	24.7	16.1	43.867	0	28.967	969470000	24	14	8	5	6	8	5	6	4	3	3	22.4	15.3	18.9	11	4	9
369	B4E1G1;Q9BUN8;E5RGY0;Q9BUN8-2	B4E1G1;Q9BUN8;E5RGY0;Q9BUN8-2	Derlin-1	DERL1	tr|B4E1G1|B4E1G1_HUMAN Derlin-1 OS=Homo sapiens GN=DERL1 PE=1 SV=1;sp|Q9BUN8|DERL1_HUMAN Derlin-1 OS=Homo sapiens GN=DERL1 PE=1 SV=1;tr|E5RGY0|E5RGY0_HUMAN Derlin-1 OS=Homo sapiens GN=DERL1 PE=1 SV=1;sp|Q9BUN8-2|DERL1_HUMAN Isoform 2 of Derlin-1 OS=Homo sa	1256100000	522690000	1003700000	309160000	139560000	58077000	111520000	1129100000	1351100000	897310000	5	5	5	32.5	32.5	32.5	17.033	0	14.469	2782400000	31	4	4	3	5	4	3	5	4	3	5	27.2	17.9	32.5	11	5	15
370	B4E1Z4;E7ETN3;P00751;H7C5H1;P00751-2;H7C526;F8WCJ9;Q5ST52;C9JRT3;F2Z3N2;Q8N6L6	B4E1Z4;E7ETN3;P00751	Complement factor B;Complement factor B Ba fragment;Complement factor B Bb fragment	CFB	tr|B4E1Z4|B4E1Z4_HUMAN Uncharacterized protein OS=Homo sapiens PE=2 SV=1;tr|E7ETN3|E7ETN3_HUMAN Uncharacterized protein OS=Homo sapiens PE=3 SV=1;sp|P00751|CFAB_HUMAN Complement factor B OS=Homo sapiens GN=CFB PE=1 SV=2	757480000	117080000	520990000	18124000	9837400	1520500	6766100	470630000	490890000	402500000	20	20	13	18.5	18.5	11.5	140.94	0	34.293	1395500000	40	11	18	6	11	18	6	11	13	5	7	16.8	7.2	12.5	18	5	17
371	B4E2D5;R4GND2;F6S7C4;Q8NEM7-2;Q8NEM7;Q8NEM7-3;H7C5F9	B4E2D5;R4GND2;F6S7C4;Q8NEM7-2;Q8NEM7;Q8NEM7-3;H7C5F9	Transcription factor SPT20 homolog	SUPT20H	tr|B4E2D5|B4E2D5_HUMAN Transcription factor SPT20 homolog OS=Homo sapiens GN=SUPT20H PE=1 SV=1;tr|R4GND2|R4GND2_HUMAN Transcription factor SPT20 homolog OS=Homo sapiens GN=SUPT20H PE=1 SV=1;tr|F6S7C4|F6S7C4_HUMAN Transcription factor SPT20 homolog OS=Homo	17339000	0	0	619240	619240	0	0	12914000	0	0	2	2	2	4.2	4.2	4.2	56.056	0.00034247	2.96	17339000	2	7	2	0	0	2	0	0	2	0	0	4.2	0	0	2	0	0
372	B4E3L3;Q6NZX9;Q96RU2-2;Q96RU2;G3V1N5;H0YG96	B4E3L3;Q6NZX9;Q96RU2-2;Q96RU2;G3V1N5	Ubiquitin carboxyl-terminal hydrolase;Ubiquitin carboxyl-terminal hydrolase 28	USP28	tr|B4E3L3|B4E3L3_HUMAN Ubiquitin carboxyl-terminal hydrolase OS=Homo sapiens GN=USP28 PE=1 SV=1;tr|Q6NZX9|Q6NZX9_HUMAN USP28 protein OS=Homo sapiens GN=USP28 PE=1 SV=1;sp|Q96RU2-2|UBP28_HUMAN Isoform 2 of Ubiquitin carboxyl-terminal hydrolase 28 OS=Homo sa	24703000	0	10588000	665870	466100	0	199770	20752000	0	15570000	3	3	3	3.8	3.8	3.8	105.82	0.0079663	1.5322	35291000	4	6	3	0	1	3	0	1	3	0	1	3.8	0	1.2	3	0	1
373	B4E3T4;Q93062-4;Q93062-5;Q93062;Q93062-2;Q93062-3;E5RJD7;H0YC46;E5RFP4;H0YBU9;E5RJ31	B4E3T4;Q93062-4;Q93062-5;Q93062;Q93062-2;Q93062-3	RNA-binding protein with multiple splicing	RBPMS	tr|B4E3T4|B4E3T4_HUMAN HCG2043421, isoform CRA_c OS=Homo sapiens GN=RBPMS PE=1 SV=1;sp|Q93062-4|RBPMS_HUMAN Isoform D of RNA-binding protein with multiple splicing OS=Homo sapiens GN=RBPMS;sp|Q93062-5|RBPMS_HUMAN Isoform E of RNA-binding protein with multi	54860000	26249000	38115000	9171000	4220000	2019100	2931900	38644000	0	46506000	4	4	4	23.7	23.7	23.7	24.997	0	12.009	119220000	5	11	2	2	2	2	2	2	2	2	2	15.6	8	15.6	2	2	1
374	B5MBX0;Q96FF9;H0YCL8	B5MBX0;Q96FF9	Sororin	CDCA5	tr|B5MBX0|B5MBX0_HUMAN Sororin OS=Homo sapiens GN=CDCA5 PE=1 SV=1;sp|Q96FF9|CDCA5_HUMAN Sororin OS=Homo sapiens GN=CDCA5 PE=1 SV=1	582850000	188330000	1405400000	114560000	30676000	9912200	73968000	645120000	989290000	735610000	10	10	10	43	43	43	33.734	0	33.345	2176600000	25	3	10	4	8	10	4	8	10	4	8	43	19.2	37.1	10	6	9
375	B5MC02;Q8NFT2-3;Q8NFT2-2;Q8NFT2	B5MC02;Q8NFT2-3;Q8NFT2-2;Q8NFT2	Metalloreductase STEAP2	STEAP2	tr|B5MC02|B5MC02_HUMAN Metalloreductase STEAP2 OS=Homo sapiens GN=STEAP2 PE=4 SV=1;sp|Q8NFT2-3|STEA2_HUMAN Isoform 3 of Metalloreductase STEAP2 OS=Homo sapiens GN=STEAP2;sp|Q8NFT2-2|STEA2_HUMAN Isoform 2 of Metalloreductase STEAP2 OS=Homo sapiens GN=STEAP2	47875000	0	9035400	2276400	1915000	0	361420	34004000	0	0	2	2	2	6	6	6	45.983	0	11.751	56911000	3	4	2	0	1	2	0	1	2	0	1	6	0	2	2	0	1
376	B5MC51;P53671-3;P53671-2;P53671	B5MC51;P53671-3;P53671-2;P53671	LIM domain kinase 2	LIMK2	tr|B5MC51|B5MC51_HUMAN LIM domain kinase 2 OS=Homo sapiens GN=LIMK2 PE=1 SV=1;sp|P53671-3|LIMK2_HUMAN Isoform 3 of LIM domain kinase 2 OS=Homo sapiens GN=LIMK2;sp|P53671-2|LIMK2_HUMAN Isoform LIMK2b of LIM domain kinase 2 OS=Homo sapiens GN=LIMK2;sp|P53671	76137000	15142000	0	2467000	2057800	409250	0	52811000	39541000	0	2	1	1	4.9	1.7	1.7	71.192	0.0091672	1.4717	91279000	2	4	1	1	1	1	1	0	1	1	0	1.7	1.7	3.2	1	1	0
377	B5MC53;B5MCF8;P39210;C9J473;H0Y6M5;E7EX18;G5E9F5;A8MPV4	B5MC53;B5MCF8;P39210;C9J473;H0Y6M5;E7EX18	Protein Mpv17	MPV17	tr|B5MC53|B5MC53_HUMAN MpV17 transgene, murine homolog, glomerulosclerosis, isoform CRA_f OS=Homo sapiens GN=MPV17 PE=4 SV=1;tr|B5MCF8|B5MCF8_HUMAN Protein Mpv17 OS=Homo sapiens GN=MPV17 PE=4 SV=1;sp|P39210|MPV17_HUMAN Protein Mpv17 OS=Homo sapiens GN=MPV1	1681700000	412690000	991360000	514290000	280280000	68782000	165230000	1097400000	734890000	1130500000	3	3	3	30	30	30	18.628	0	56.473	3085700000	31	8	3	3	3	3	3	3	3	3	3	30	30	30	9	11	11
378	B5MCA4;P16422;C9JKY3	B5MCA4;P16422	Epithelial cell adhesion molecule	EPCAM	tr|B5MCA4|B5MCA4_HUMAN Epithelial cell adhesion molecule OS=Homo sapiens GN=EPCAM PE=1 SV=1;sp|P16422|EPCAM_HUMAN Epithelial cell adhesion molecule OS=Homo sapiens GN=EPCAM PE=1 SV=2	2464400000	1344200000	2468500000	330370000	129710000	70745000	129920000	2011600000	3048600000	3132800000	7	7	7	26.9	26.9	26.9	37.893	0	121.32	6277100000	33	3	6	6	5	6	6	5	6	6	5	26.9	24	16.7	10	15	8
379	B5MCB3;Q4FZB7-4;Q4FZB7-2;Q4FZB7;C9JFG1;C9JP58;C9J6S5;F8WFA4;B7WNX0	B5MCB3;Q4FZB7-4;Q4FZB7-2;Q4FZB7;C9JFG1;C9JP58;C9J6S5;F8WFA4;B7WNX0	Histone-lysine N-methyltransferase SUV420H1	SUV420H1	tr|B5MCB3|B5MCB3_HUMAN Histone-lysine N-methyltransferase SUV420H1 OS=Homo sapiens GN=SUV420H1 PE=4 SV=2;sp|Q4FZB7-4|SV421_HUMAN Isoform 3 of Histone-lysine N-methyltransferase SUV420H1 OS=Homo sapiens GN=SUV420H1;sp|Q4FZB7-2|SV421_HUMAN Isoform 2 of Histo	35087000	0	0	1461900	1461900	0	0	23177000	0	0	2	2	2	6	6	6	45.689	0	5.0651	35087000	1	9	2	0	0	2	0	0	2	0	0	6	0	0	1	0	0
380	B5MCF9;O00541;O00541-2;B3KXD6;H7C267;Q674R7	B5MCF9;O00541;O00541-2;B3KXD6	Pescadillo homolog	PES1	tr|B5MCF9|B5MCF9_HUMAN Pescadillo homolog OS=Homo sapiens GN=PES1 PE=1 SV=1;sp|O00541|PESC_HUMAN Pescadillo homolog OS=Homo sapiens GN=PES1 PE=1 SV=1;sp|O00541-2|PESC_HUMAN Isoform 2 of Pescadillo homolog OS=Homo sapiens GN=PES1;tr|B3KXD6|B3KXD6_HUMAN Pesc	13481000000	5706400000	14774000000	917880000	364360000	154230000	399290000	14250000000	11080000000	13959000000	31	31	31	54.1	54.1	54.1	66.077	0	192.44	33961000000	209	6	27	23	27	27	23	27	27	23	27	49.9	46.1	49	62	65	82
381	B5MCS3;B5MCU6;B5MCQ6;E7ETT9;Q96DB2-2;Q96DB2	B5MCS3;B5MCU6;B5MCQ6;E7ETT9;Q96DB2-2;Q96DB2	Histone deacetylase 11	HDAC11	tr|B5MCS3|B5MCS3_HUMAN Histone deacetylase 11 OS=Homo sapiens GN=HDAC11 PE=4 SV=1;tr|B5MCU6|B5MCU6_HUMAN Histone deacetylase 11 OS=Homo sapiens GN=HDAC11 PE=4 SV=1;tr|B5MCQ6|B5MCQ6_HUMAN Histone deacetylase 11 OS=Homo sapiens GN=HDAC11 PE=4 SV=1;tr|E7ETT9|	24691000	0	9242200	3393300	2469100	0	924220	0	0	11199000	2	2	2	19.9	19.9	19.9	20.391	0.00034282	2.9732	33933000	2	6	1	0	1	1	0	1	1	0	1	7.2	0	12.7	1	0	1
382	B5MCR8;Q6NXT4-4;Q6NXT4;Q6NXT4-2;Q6NXT4-3	B5MCR8;Q6NXT4-4;Q6NXT4;Q6NXT4-2;Q6NXT4-3	Zinc transporter 6	SLC30A6	tr|B5MCR8|B5MCR8_HUMAN Solute carrier family 30 (Zinc transporter), member 6, isoform CRA_b OS=Homo sapiens GN=SLC30A6 PE=1 SV=1;sp|Q6NXT4-4|ZNT6_HUMAN Isoform 4 of Zinc transporter 6 OS=Homo sapiens GN=SLC30A6;sp|Q6NXT4|ZNT6_HUMAN Zinc transporter 6 OS=Ho	380000000	48751000	383790000	45141000	21111000	2708400	21322000	341930000	232260000	245280000	3	3	3	14.7	14.7	14.7	42.509	0	13.781	812540000	11	5	2	2	2	2	2	2	2	2	2	11.6	7.2	11.6	4	2	5
383	H7C128;H7C179;B5MCW3;H7C127;Q9H0E9-4;Q9H0E9-2;Q9H0E9;F8WDX5;D6RID0;F8WCS7;F8WBH2;C9JV05;Q9H0E9-3	H7C128;H7C179;B5MCW3;H7C127;Q9H0E9-4;Q9H0E9-2;Q9H0E9;F8WDX5;D6RID0;F8WCS7;F8WBH2;C9JV05;Q9H0E9-3	Bromodomain-containing protein 8	BRD8	tr|H7C128|H7C128_HUMAN Bromodomain-containing protein 8 (Fragment) OS=Homo sapiens GN=BRD8 PE=1 SV=1;tr|H7C179|H7C179_HUMAN Bromodomain-containing protein 8 (Fragment) OS=Homo sapiens GN=BRD8 PE=1 SV=1;tr|B5MCW3|B5MCW3_HUMAN Bromodomain-containing protein	42415000	0	0	1116200	1116200	0	0	34092000	0	0	2	2	2	4.6	4.6	4.6	93.293	0	5.6509	42415000	2	13	2	0	0	2	0	0	2	0	0	4.6	0	0	2	0	0
384	B5MD23;O75954	B5MD23;O75954	Tetraspanin;Tetraspanin-9	TSPAN9	tr|B5MD23|B5MD23_HUMAN Tetraspanin OS=Homo sapiens GN=TSPAN9 PE=3 SV=1;sp|O75954|TSN9_HUMAN Tetraspanin-9 OS=Homo sapiens GN=TSPAN9 PE=1 SV=1	360020000	139380000	453120000	73271000	27694000	10722000	34856000	393650000	326370000	336010000	4	4	4	21.8	21.8	21.8	29.559	0	37.889	952530000	16	2	4	2	4	4	2	4	4	2	4	21.8	9.6	21.8	7	4	5
385	B5MD58;P36956;P36956-4;K7EMT8;K7EIW8;P36956-3;P36956-2;K7EMD1	B5MD58;P36956;P36956-4;K7EMT8;K7EIW8;P36956-3;P36956-2	Sterol regulatory element-binding protein 1;Processed sterol regulatory element-binding protein 1	SREBF1	tr|B5MD58|B5MD58_HUMAN Sterol regulatory element-binding protein 1 OS=Homo sapiens GN=SREBF1 PE=1 SV=1;sp|P36956|SRBP1_HUMAN Sterol regulatory element-binding protein 1 OS=Homo sapiens GN=SREBF1 PE=1 SV=2;sp|P36956-4|SRBP1_HUMAN Isoform 4 of Sterol regulat	145480000	15827000	66684000	4470500	2852600	310340	1307500	42093000	98341000	71975000	6	5	5	10.9	9.9	9.9	95.892	0	5.922	227990000	5	8	4	1	3	3	1	3	3	1	3	8.5	2.9	5.3	2	1	2
386	B5MDE0;Q96AA3;C9JP01;U3KQE9	B5MDE0;Q96AA3	Protein RFT1 homolog	RFT1	tr|B5MDE0|B5MDE0_HUMAN Protein RFT1 homolog OS=Homo sapiens GN=RFT1 PE=4 SV=1;sp|Q96AA3|RFT1_HUMAN Protein RFT1 homolog OS=Homo sapiens GN=RFT1 PE=1 SV=1	1253000000	551800000	556090000	107310000	56956000	25082000	25277000	1091700000	1040200000	691720000	7	7	7	14.3	14.3	14.3	55.835	0	68.399	2360900000	29	4	5	7	3	5	7	3	5	7	3	10.6	14.3	6.8	9	10	10
387	B5MDF5;P62826;J3KQE5;F5H018;B4DV51;H0YFC6;A0A087X0W0	B5MDF5;P62826;J3KQE5;F5H018;B4DV51	GTP-binding nuclear protein Ran	RAN	tr|B5MDF5|B5MDF5_HUMAN GTP-binding nuclear protein Ran OS=Homo sapiens GN=RAN PE=1 SV=1;sp|P62826|RAN_HUMAN GTP-binding nuclear protein Ran OS=Homo sapiens GN=RAN PE=1 SV=3;tr|J3KQE5|J3KQE5_HUMAN GTP-binding nuclear protein Ran (Fragment) OS=Homo sapiens G	16873000000	8765800000	14963000000	3691100000	1533900000	796890000	1360300000	11942000000	18275000000	14307000000	12	12	12	47.2	47.2	47.2	26.224	0	75.671	40602000000	127	7	11	11	11	11	11	11	11	11	11	47.2	47.2	46.8	36	42	49
388	B5MDU6;Q9H6V9;Q9H6V9-2;Q9H6V9-3;B5MCU4;Q9H6V9-4;C9JUM0;B5MCE2;B4DRG3;C9JHU6;D3YTH1	B5MDU6;Q9H6V9;Q9H6V9-2;Q9H6V9-3;B5MCU4;Q9H6V9-4;C9JUM0	UPF0554 protein C2orf43	LDAH;C2orf43	tr|B5MDU6|B5MDU6_HUMAN UPF0554 protein C2orf43 OS=Homo sapiens GN=C2orf43 PE=1 SV=1;sp|Q9H6V9|CB043_HUMAN UPF0554 protein C2orf43 OS=Homo sapiens GN=C2orf43 PE=1 SV=1;sp|Q9H6V9-2|CB043_HUMAN Isoform 2 of UPF0554 protein C2orf43 OS=Homo sapiens GN=C2orf43;s	1454100000	719140000	2182700000	189390000	63221000	31267000	94901000	1461500000	1595000000	2007700000	12	12	12	34.6	34.6	34.6	42.668	0	46.845	4355900000	36	11	8	7	10	8	7	10	8	7	10	24.1	21.4	32.4	9	9	18
389	Q99613;B5ME19;Q99613-2;H3BPE3;H3BPE4;H3BTY8	Q99613;B5ME19;Q99613-2	Eukaryotic translation initiation factor 3 subunit C;Eukaryotic translation initiation factor 3 subunit C-like protein	EIF3C;EIF3CL	sp|Q99613|EIF3C_HUMAN Eukaryotic translation initiation factor 3 subunit C OS=Homo sapiens GN=EIF3C PE=1 SV=1;sp|B5ME19|EIFCL_HUMAN Eukaryotic translation initiation factor 3 subunit C-like protein OS=Homo sapiens GN=EIF3CL PE=3 SV=1;sp|Q99613-2|EIF3C_HUMA	4028200000	1176600000	1895800000	154360000	87569000	25578000	41213000	2729100000	2978500000	2256900000	25	25	25	30.2	30.2	30.2	105.34	0	147.67	7100600000	73	6	18	15	17	18	15	17	18	15	17	21.1	18.4	21.5	24	23	26
390	E7EW69;E7EX04;B5ME97;Q9P0V9-3;Q9P0V9;Q9P0V9-2;F5GYV2;F5H1F2	E7EW69;E7EX04;B5ME97;Q9P0V9-3;Q9P0V9;Q9P0V9-2	Septin-10	2010-09-01	tr|E7EW69|E7EW69_HUMAN Septin-10 OS=Homo sapiens GN=SEPT10 PE=1 SV=1;tr|E7EX04|E7EX04_HUMAN Septin-10 OS=Homo sapiens GN=SEPT10 PE=1 SV=1;tr|B5ME97|B5ME97_HUMAN Septin 10, isoform CRA_c OS=Homo sapiens GN=SEPT10 PE=1 SV=2;sp|Q9P0V9-3|SEP10_HUMAN Isoform 3	34842000	22823000	87962000	5393600	1290400	845300	3257800	58435000	46076000	72963000	6	4	4	17.3	11.8	11.8	52.145	0.00034524	3.0615	145630000	5	8	3	2	5	2	2	3	2	2	3	8.7	5.6	14.2	2	1	2
391	B6VEX4;Q8IZP0-10;Q8IZP0-8;Q8IZP0-7;Q8IZP0-2;Q8IZP0-4;Q8IZP0-3;Q8IZP0-5;Q8IZP0-6;Q8IZP0-9;Q8IZP0;Q8IZP0-12;Q8IZP0-11	B6VEX4;Q8IZP0-10;Q8IZP0-8;Q8IZP0-7;Q8IZP0-2;Q8IZP0-4;Q8IZP0-3;Q8IZP0-5;Q8IZP0-6;Q8IZP0-9;Q8IZP0;Q8IZP0-12;Q8IZP0-11	Abl interactor 1	ABI1	tr|B6VEX4|B6VEX4_HUMAN Abl interactor 1 OS=Homo sapiens GN=ABI1 PE=1 SV=1;sp|Q8IZP0-10|ABI1_HUMAN Isoform 10 of Abl interactor 1 OS=Homo sapiens GN=ABI1;sp|Q8IZP0-8|ABI1_HUMAN Isoform 8 of Abl interactor 1 OS=Homo sapiens GN=ABI1;sp|Q8IZP0-7|ABI1_HUMAN Iso	266830000	29647000	275700000	27246000	12706000	1411800	13129000	140770000	100090000	287650000	6	6	6	22.6	22.6	22.6	43.294	0	15.31	572180000	13	13	4	3	5	4	3	5	4	3	5	15.8	12	18.8	4	3	6
392	M0R0R3;M0R2G5;B7WNH4;Q9BQ49	M0R0R3;M0R2G5;B7WNH4;Q9BQ49	Small integral membrane protein 7	SMIM7	tr|M0R0R3|M0R0R3_HUMAN Small integral membrane protein 7 OS=Homo sapiens GN=SMIM7 PE=1 SV=1;tr|M0R2G5|M0R2G5_HUMAN Uncharacterized protein (Fragment) OS=Homo sapiens PE=1 SV=1;tr|B7WNH4|B7WNH4_HUMAN Small integral membrane protein 7 OS=Homo sapiens GN=SMIM	16038000	88467000	19403000	24782000	3207600	17693000	3880600	59937000	117540000	62303000	3	3	3	41.3	41.3	41.3	7.3436	0	4.7047	123910000	5	4	1	3	1	1	3	1	1	3	1	11.1	41.3	30.2	1	3	1
393	B7WP74;Q9HCG8	B7WP74;Q9HCG8	Pre-mRNA-splicing factor CWC22 homolog	CWC22	tr|B7WP74|B7WP74_HUMAN Pre-mRNA-splicing factor CWC22 homolog (Fragment) OS=Homo sapiens GN=CWC22 PE=1 SV=1;sp|Q9HCG8|CWC22_HUMAN Pre-mRNA-splicing factor CWC22 homolog OS=Homo sapiens GN=CWC22 PE=1 SV=3	609950000	299380000	603810000	34390000	13863000	6804100	13723000	515430000	649970000	734800000	14	14	14	21.3	21.3	21.3	85.576	0	36.915	1513100000	34	2	9	9	8	9	9	8	9	9	8	13.7	14.2	12.9	13	11	10
394	B7WP89;Q0P651-3;Q0P651-2;Q0P651;Q0P651-4	B7WP89;Q0P651-3;Q0P651-2;Q0P651;Q0P651-4	Uncharacterized protein C4orf29	C4orf29	tr|B7WP89|B7WP89_HUMAN Uncharacterized protein C4orf29 OS=Homo sapiens GN=C4orf29 PE=4 SV=1;sp|Q0P651-3|CD029_HUMAN Isoform 3 of Uncharacterized protein C4orf29 OS=Homo sapiens GN=C4orf29;sp|Q0P651-2|CD029_HUMAN Isoform 2 of Uncharacterized protein C4orf29	23651000	0	66381000	4092400	1075000	0	3017300	50291000	0	30994000	2	2	2	6	6	6	43.353	0	5.0042	90032000	3	5	1	0	2	1	0	2	1	0	2	3.7	0	6	1	0	2
395	H7C355;G3V195;B7WPE2;Q32P44	H7C355;G3V195;B7WPE2;Q32P44	Echinoderm microtubule-associated protein-like 3	EML3	tr|H7C355|H7C355_HUMAN Echinoderm microtubule-associated protein-like 3 (Fragment) OS=Homo sapiens GN=EML3 PE=1 SV=1;tr|G3V195|G3V195_HUMAN Echinoderm microtubule associated protein like 3, isoform CRA_c OS=Homo sapiens GN=EML3 PE=1 SV=1;tr|B7WPE2|B7WPE2_H	16360000	0	13404000	3307200	1817800	0	1489400	10542000	0	10501000	1	1	1	11.7	11.7	11.7	14.469	0.0001807	3.991	29765000	2	4	1	0	1	1	0	1	1	0	1	11.7	0	11.7	1	0	1
396	B7WPG3;C9IYN3;D6W592;Q8WVV9-5;Q8WVV9-4;Q8WVV9;H7C464;Q8WVV9-3;Q8WVV9-2;H7BXH8;C9JJZ7	B7WPG3;C9IYN3;D6W592;Q8WVV9-5;Q8WVV9-4;Q8WVV9	Heterogeneous nuclear ribonucleoprotein L-like	HNRNPLL;HNRPLL	tr|B7WPG3|B7WPG3_HUMAN Uncharacterized protein OS=Homo sapiens GN=HNRPLL PE=1 SV=1;tr|C9IYN3|C9IYN3_HUMAN Heterogeneous nuclear ribonucleoprotein L-like OS=Homo sapiens GN=HNRNPLL PE=1 SV=2;tr|D6W592|D6W592_HUMAN Heterogeneous nuclear ribonucleoprotein L-l	2416400000	740740000	2471400000	187620000	80546000	24691000	82381000	1911600000	1908200000	2032200000	23	22	22	67.3	67.3	67.3	56.45	0	162.82	5628500000	75	11	16	13	17	15	12	16	15	12	16	48.4	41.9	52	30	15	30
397	B7Z1T1;O00258;H7C384;H7BYE5;O00258-2	B7Z1T1;O00258;H7C384;H7BYE5;O00258-2	Tail-anchored protein insertion receptor WRB	WRB	tr|B7Z1T1|B7Z1T1_HUMAN Tail-anchored protein insertion receptor WRB OS=Homo sapiens GN=WRB PE=2 SV=1;sp|O00258|WRB_HUMAN Tail-anchored protein insertion receptor WRB OS=Homo sapiens GN=WRB PE=1 SV=2;tr|H7C384|H7C384_HUMAN Tail-anchored protein insertion re	86945000	0	108840000	16316000	7245400	0	9070300	81376000	0	75147000	2	2	2	11	11	11	19.73	0.005689	1.6888	195790000	4	5	2	0	2	2	0	2	2	0	2	11	0	11	2	0	2
398	B7Z2C8;Q969H0-4;Q969H0-3;Q969H0-2;Q969H0	B7Z2C8;Q969H0-4;Q969H0-3;Q969H0-2;Q969H0	F-box/WD repeat-containing protein 7	FBXW7	tr|B7Z2C8|B7Z2C8_HUMAN F-box/WD repeat-containing protein 7 OS=Homo sapiens GN=FBXW7 PE=2 SV=1;sp|Q969H0-4|FBXW7_HUMAN Isoform 4 of F-box/WD repeat-containing protein 7 OS=Homo sapiens GN=FBXW7;sp|Q969H0-3|FBXW7_HUMAN Isoform 3 of F-box/WD repeat-containin	0	0	1608200000	45950000	0	0	45950000	0	0	1810300000	1	1	1	2.1	2.1	2.1	59.723	1	-2	1608200000	1	5	0	0	1	0	0	1	0	0	1	0	0	2.1	0	0	1
399	B7Z2R7;Q5T8D3-2;Q5T8D3-3;Q5T8D3;Q5T8D3-4;X6RDD7;Q5T8E0;K7EM05;Q8NC06;Q8NC06-3	B7Z2R7;Q5T8D3-2;Q5T8D3-3;Q5T8D3;Q5T8D3-4	Acyl-CoA-binding domain-containing protein 5	ACBD5	tr|B7Z2R7|B7Z2R7_HUMAN Acyl-CoA-binding domain-containing protein 5 OS=Homo sapiens GN=ACBD5 PE=1 SV=1;sp|Q5T8D3-2|ACBD5_HUMAN Isoform 2 of Acyl-CoA-binding domain-containing protein 5 OS=Homo sapiens GN=ACBD5;sp|Q5T8D3-3|ACBD5_HUMAN Isoform 3 of Acyl-CoA-	1756900000	792810000	1323400000	124940000	56674000	25574000	42689000	1726100000	1788900000	1485000000	15	15	14	29.4	29.4	29.4	58.792	0	113.44	3873100000	43	10	9	9	10	9	9	10	9	9	9	23.5	22.8	24.7	14	17	12
400	B7Z2Y2;Q14746-2;Q14746;V9GY21	B7Z2Y2;Q14746-2;Q14746	Conserved oligomeric Golgi complex subunit 2	COG2	tr|B7Z2Y2|B7Z2Y2_HUMAN Conserved oligomeric Golgi complex subunit 2 OS=Homo sapiens GN=COG2 PE=1 SV=1;sp|Q14746-2|COG2_HUMAN Isoform 2 of Conserved oligomeric Golgi complex subunit 2 OS=Homo sapiens GN=COG2;sp|Q14746|COG2_HUMAN Conserved oligomeric Golgi c	352690000	45970000	191190000	12550000	7504100	978090	4067800	300110000	117400000	202640000	12	12	12	30.6	30.6	30.6	76.078	0	36.004	589850000	18	4	10	2	7	10	2	7	10	2	7	25.5	5.7	15.6	10	2	6
401	B7Z3R2;Q9ULQ1;Q9ULQ1-3;Q9ULQ1-2;H0YIK4;H0YHX1	B7Z3R2;Q9ULQ1;Q9ULQ1-3;Q9ULQ1-2	Two pore calcium channel protein 1	TPCN1	tr|B7Z3R2|B7Z3R2_HUMAN Two pore calcium channel protein 1 OS=Homo sapiens GN=TPCN1 PE=2 SV=1;sp|Q9ULQ1|TPC1_HUMAN Two pore calcium channel protein 1 OS=Homo sapiens GN=TPCN1 PE=1 SV=3;sp|Q9ULQ1-3|TPC1_HUMAN Isoform 3 of Two pore calcium channel protein 1 O	113800000	18946000	177710000	9131000	3347000	557250	5226700	121670000	92305000	118950000	5	5	5	7.9	7.9	7.9	87.317	0	13.034	310460000	11	6	4	1	4	4	1	4	4	1	4	6.3	2.3	7	4	1	6
402	B7Z4B8;Q9BUJ2-4;Q9BUJ2-2;Q9BUJ2;M0R3F1;Q9BUJ2-3;M0QYZ0;M0QYI8;M0R203;M0QYM5;M0QZV6;M0R0K8;Q9BUJ2-5	B7Z4B8;Q9BUJ2-4;Q9BUJ2-2;Q9BUJ2;M0R3F1;Q9BUJ2-3;M0QYZ0	Heterogeneous nuclear ribonucleoprotein U-like protein 1	HNRNPUL1	tr|B7Z4B8|B7Z4B8_HUMAN Heterogeneous nuclear ribonucleoprotein U-like protein 1 OS=Homo sapiens GN=HNRNPUL1 PE=1 SV=1;sp|Q9BUJ2-4|HNRL1_HUMAN Isoform 4 of Heterogeneous nuclear ribonucleoprotein U-like protein 1 OS=Homo sapiens GN=HNRNPUL1;sp|Q9BUJ2-2|HNRL	6771800000	2535100000	7296900000	368970000	150480000	56335000	162150000	5462400000	6547500000	6705400000	26	25	25	40.7	39.9	39.9	86.121	0	158.93	16604000000	122	13	21	13	22	21	12	21	21	12	21	37.2	21.1	34.3	41	34	47
403	E7EPW5;G3XAH9;B7Z4U3;B7Z4L1;E7EPD9;H7BXS2;Q9NRC1-6;Q9NRC1-5;Q9NRC1-4;Q9NRC1-3;Q9NRC1-2;E9PCV1;Q9NRC1;E7ENZ9;C9JU30;Q9NRC1-7;Q8TDW4-6;Q8TDW4-2;Q8TDW4-7;Q8TDW4-5;Q8TDW4-3;Q8TDW4;H0Y7M0;Q8TDW4-8;Q8TDW4-4;C9JZV9;C9JRQ0;C9JRW1	E7EPW5;G3XAH9;B7Z4U3;B7Z4L1;E7EPD9;H7BXS2;Q9NRC1-6;Q9NRC1-5;Q9NRC1-4;Q9NRC1-3;Q9NRC1-2;E9PCV1;Q9NRC1;E7ENZ9;C9JU30;Q9NRC1-7	Suppressor of tumorigenicity 7 protein	ST7	tr|E7EPW5|E7EPW5_HUMAN Suppressor of tumorigenicity 7 protein OS=Homo sapiens GN=ST7 PE=1 SV=1;tr|G3XAH9|G3XAH9_HUMAN Suppression of tumorigenicity 7, isoform CRA_b OS=Homo sapiens GN=ST7 PE=1 SV=1;tr|B7Z4U3|B7Z4U3_HUMAN Suppressor of tumorigenicity 7 prot	150680000	14846000	94316000	9280200	5381600	530210	3368400	158630000	0	53751000	8	8	7	19.7	19.7	18.3	58.067	0	6.6939	259850000	7	28	4	2	3	4	2	3	4	1	3	10.4	4.3	7.3	5	0	2
404	B7Z4W8;E9PD09;Q96HH9-5;Q96HH9-4;Q96HH9;Q96HH9-2;Q96HH9-3	B7Z4W8;E9PD09;Q96HH9-5;Q96HH9-4;Q96HH9;Q96HH9-2;Q96HH9-3	GRAM domain-containing protein 3	GRAMD3	tr|B7Z4W8|B7Z4W8_HUMAN GRAM domain-containing protein 3 OS=Homo sapiens GN=GRAMD3 PE=1 SV=1;tr|E9PD09|E9PD09_HUMAN GRAM domain-containing protein 3 OS=Homo sapiens GN=GRAMD3 PE=1 SV=1;sp|Q96HH9-5|GRAM3_HUMAN Isoform 5 of GRAM domain-containing protein 3 OS	13372000	0	0	742890	742890	0	0	13372000	0	0	1	1	1	5	5	5	36.041	0.0088813	1.4971	13372000	1	7	1	0	0	1	0	0	1	0	0	5	0	0	1	0	0
405	F5H7S3;H7BYY1;B7Z596;H0YK48;P09493-2;P09493-5;P09493-8;H0YNC7;P09493-7;P09493-6;H0YL42;H0YK20;H0YL80;H0YN06;K7EQW8	F5H7S3;H7BYY1;B7Z596;H0YK48;P09493-2;P09493-5;P09493-8;H0YNC7;P09493-7;P09493-6	Tropomyosin alpha-1 chain	TPM1	tr|F5H7S3|F5H7S3_HUMAN Tropomyosin alpha-1 chain OS=Homo sapiens GN=TPM1 PE=1 SV=2;tr|H7BYY1|H7BYY1_HUMAN Tropomyosin 1 (Alpha), isoform CRA_m OS=Homo sapiens GN=TPM1 PE=1 SV=1;tr|B7Z596|B7Z596_HUMAN Tropomyosin alpha-1 chain OS=Homo sapiens GN=TPM1 PE=1 S	1954700000	935200000	1108700000	181760000	88852000	42509000	50397000	1517300000	2205000000	1682900000	19	12	3	58	41.2	13.9	28.524	0	26.555	3998700000	30	15	14	15	12	8	8	7	2	2	2	41.2	44.5	38.4	9	14	7
406	B7Z5R6;Q14596-2;Q14596	B7Z5R6;Q14596-2;Q14596	Next to BRCA1 gene 1 protein	NBR1	tr|B7Z5R6|B7Z5R6_HUMAN Next to BRCA1 gene 1 protein OS=Homo sapiens GN=NBR1 PE=1 SV=1;sp|Q14596-2|NBR1_HUMAN Isoform 2 of Next to BRCA1 gene 1 protein OS=Homo sapiens GN=NBR1;sp|Q14596|NBR1_HUMAN Next to BRCA1 gene 1 protein OS=Homo sapiens GN=NBR1 PE=1 SV	282340000	35644000	174560000	14925000	8555700	1080100	5289600	242650000	66121000	205070000	9	9	9	20.9	20.9	20.9	92.948	0	40.177	492540000	13	3	6	2	6	6	2	6	6	2	6	14.2	5	13.1	6	2	5
407	B7Z6D5;Q96GQ7;A0A087X059;A0A087WYH5	B7Z6D5;Q96GQ7	Probable ATP-dependent RNA helicase DDX27	DDX27	tr|B7Z6D5|B7Z6D5_HUMAN Probable ATP-dependent RNA helicase DDX27 OS=Homo sapiens GN=DDX27 PE=1 SV=1;sp|Q96GQ7|DDX27_HUMAN Probable ATP-dependent RNA helicase DDX27 OS=Homo sapiens GN=DDX27 PE=1 SV=2	14265000000	6477500000	12406000000	789240000	339640000	154230000	295370000	13424000000	14671000000	12065000000	38	38	38	50.1	50.1	50.1	86.604	0	286.5	33148000000	226	4	32	31	31	32	31	31	32	31	31	45.6	40.4	43.5	78	78	70
408	B7Z6T3;Q8NDZ6;B7Z6A5;E9PCX5;D6RAR3;E9PFW6;Q8NDZ6-2	B7Z6T3;Q8NDZ6;B7Z6A5;E9PCX5	Transmembrane protein 161B	TMEM161B	tr|B7Z6T3|B7Z6T3_HUMAN Transmembrane protein 161B OS=Homo sapiens GN=TMEM161B PE=2 SV=1;sp|Q8NDZ6|T161B_HUMAN Transmembrane protein 161B OS=Homo sapiens GN=TMEM161B PE=2 SV=1;tr|B7Z6A5|B7Z6A5_HUMAN Transmembrane protein 161B OS=Homo sapiens GN=TMEM161B PE=	20954000	0	21554000	1771200	873070	0	898090	17828000	0	0	3	3	3	11.8	11.8	11.8	54.37	0.0092937	1.438	42508000	1	7	2	0	1	2	0	1	2	0	1	9.9	0	1.9	1	0	0
409	B7Z779;K7ERE2;Q96A25;Q96A25-2	B7Z779;K7ERE2;Q96A25;Q96A25-2	Transmembrane protein 106A	TMEM106A	tr|B7Z779|B7Z779_HUMAN Transmembrane protein 106A OS=Homo sapiens GN=TMEM106A PE=2 SV=1;tr|K7ERE2|K7ERE2_HUMAN Transmembrane protein 106A (Fragment) OS=Homo sapiens GN=TMEM106A PE=4 SV=1;sp|Q96A25|T106A_HUMAN Transmembrane protein 106A OS=Homo sapiens GN=T	94262000	0	52806000	13370000	8569300	0	4800500	53835000	0	54074000	2	2	2	18.1	18.1	18.1	23.794	0.00033807	2.771	147070000	5	4	2	1	1	2	1	1	2	1	1	18.1	5.6	5.6	3	1	1
410	B7Z7F3;Q9H6Z4-3;Q9H6Z4-2;Q9H6Z4;K7EIJ4;K7EMH9;K7ESQ0;K7EN31	B7Z7F3;Q9H6Z4-3;Q9H6Z4-2;Q9H6Z4;K7EIJ4	Ran-binding protein 3	RANBP3	tr|B7Z7F3|B7Z7F3_HUMAN Ran-binding protein 3 OS=Homo sapiens GN=RANBP3 PE=2 SV=1;sp|Q9H6Z4-3|RANB3_HUMAN Isoform 3 of Ran-binding protein 3 OS=Homo sapiens GN=RANBP3;sp|Q9H6Z4-2|RANB3_HUMAN Isoform 2 of Ran-binding protein 3 OS=Homo sapiens GN=RANBP3;sp|Q9	141170000	20749000	50275000	8161300	5429600	798050	1933600	89646000	58324000	66734000	4	4	4	9.5	9.5	9.5	52.894	0	8.0789	212190000	9	8	3	2	3	3	2	3	3	2	3	7.1	4.3	7.1	4	2	3
411	D6RE77;B7Z7Y1;E9PCH4;Q8TEU7-2;Q8TEU7-5;Q8TEU7-3;Q8TEU7;Q8TEU7-4	D6RE77;B7Z7Y1;E9PCH4;Q8TEU7-2;Q8TEU7-5;Q8TEU7-3;Q8TEU7;Q8TEU7-4	Rap guanine nucleotide exchange factor 6	RAPGEF6	tr|D6RE77|D6RE77_HUMAN Rap guanine nucleotide exchange factor 6 OS=Homo sapiens GN=RAPGEF6 PE=4 SV=1;tr|B7Z7Y1|B7Z7Y1_HUMAN Rap guanine nucleotide exchange factor 6 OS=Homo sapiens GN=RAPGEF6 PE=1 SV=1;tr|E9PCH4|E9PCH4_HUMAN Uncharacterized protein OS=Homo	9925800	0	0	150390	150390	0	0	7126600	0	0	1	1	1	1.8	1.8	1.8	126.41	0.0094413	1.4283	9925800	2	8	1	0	0	1	0	0	1	0	0	1.8	0	0	2	0	0
412	B7Z896;F5H3M2;Q9BVG8-5;Q9BVG8-2;Q9BVG8;Q9BVG8-6;H3BTL6;Q9BVG8-4;H3BUC0	B7Z896;F5H3M2;Q9BVG8-5;Q9BVG8-2;Q9BVG8;Q9BVG8-6;H3BTL6;Q9BVG8-4	Kinesin-like protein;Kinesin-like protein KIFC3	KIFC3	tr|B7Z896|B7Z896_HUMAN Kinesin-like protein KIFC3 OS=Homo sapiens GN=KIFC3 PE=2 SV=1;tr|F5H3M2|F5H3M2_HUMAN Kinesin-like protein KIFC3 OS=Homo sapiens GN=KIFC3 PE=3 SV=1;sp|Q9BVG8-5|KIFC3_HUMAN Isoform 4 of Kinesin-like protein KIFC3 OS=Homo sapiens GN=KIF	0	0	37322000	829370	0	0	829370	0	0	38260000	3	3	3	5.3	5.3	5.3	76.714	0.00050429	2.6954	37322000	2	9	0	0	3	0	0	3	0	0	3	0	0	5.3	0	0	2
413	E9PS63;F5H8L0;Q5R372-7;Q5R372-8;Q5R372-6;Q5R372-5;B7ZAP0	E9PS63;F5H8L0;Q5R372-7;Q5R372-8;Q5R372-6;Q5R372-5;B7ZAP0	Rab GTPase-activating protein 1-like, isoform 10	RABGAP1L	tr|E9PS63|E9PS63_HUMAN Rab GTPase-activating protein 1-like (Fragment) OS=Homo sapiens GN=RABGAP1L PE=1 SV=1;tr|F5H8L0|F5H8L0_HUMAN Rab GTPase-activating protein 1-like OS=Homo sapiens GN=RABGAP1L PE=1 SV=1;sp|Q5R372-7|RBG1L_HUMAN Isoform 7 of Rab GTPase-a	0	200170000	0	14298000	0	14298000	0	0	337070000	0	1	1	1	5.3	5.3	5.3	22.512	0.0070533	1.5875	200170000	2	7	0	1	0	0	1	0	0	1	0	0	5.3	0	0	2	0
414	B7ZAQ6-2;B7ZAQ6-3;P0CG08;B7ZAQ6;A6NKF9;A0A087WW82;U3KPV2;E9PKY3;A0A087WW78	B7ZAQ6-2;B7ZAQ6-3;P0CG08;B7ZAQ6;A6NKF9;A0A087WW82;U3KPV2;E9PKY3;A0A087WW78	Golgi pH regulator A;Golgi pH regulator B;Putative Golgi pH regulator C	GPR89A;GPR89B;GPR89C	sp|B7ZAQ6-2|GPHRA_HUMAN Isoform 2 of Golgi pH regulator A OS=Homo sapiens GN=GPR89A;sp|B7ZAQ6-3|GPHRA_HUMAN Isoform 3 of Golgi pH regulator A OS=Homo sapiens GN=GPR89A;sp|P0CG08|GPHRB_HUMAN Golgi pH regulator B OS=Homo sapiens GN=GPR89B PE=1 SV=1;sp|B7ZAQ6	652090000	260560000	493820000	66975000	31052000	12408000	23515000	655840000	550850000	526700000	6	6	6	26.9	26.9	26.9	38.484	0	36.013	1406500000	19	9	6	4	4	6	4	4	6	4	4	26.9	19.1	14.3	9	5	5
415	B7ZC39;B7ZC38;Q9NR46;Q9NR46-2;F8WFB9	B7ZC39;B7ZC38;Q9NR46;Q9NR46-2;F8WFB9	Endophilin-B2	SH3GLB2	tr|B7ZC39|B7ZC39_HUMAN Endophilin-B2 OS=Homo sapiens GN=SH3GLB2 PE=1 SV=1;tr|B7ZC38|B7ZC38_HUMAN Endophilin-B2 OS=Homo sapiens GN=SH3GLB2 PE=1 SV=1;sp|Q9NR46|SHLB2_HUMAN Endophilin-B2 OS=Homo sapiens GN=SH3GLB2 PE=1 SV=1;sp|Q9NR46-2|SHLB2_HUMAN Isoform 2 o	18125000	0	4742500	1039400	823860	0	215570	16679000	0	0	2	2	2	7.5	7.5	7.5	41.668	0.00017775	3.6253	22867000	1	5	1	0	1	1	0	1	1	0	1	3.5	0	4	1	0	0
416	B7ZKM0;Q15020;F8VV04;Q15020-2;F8W667;H0YHU8;F8VZM2;F8VVK9	B7ZKM0;Q15020;F8VV04	Squamous cell carcinoma antigen recognized by T-cells 3	SART3	tr|B7ZKM0|B7ZKM0_HUMAN SART3 protein OS=Homo sapiens GN=SART3 PE=1 SV=1;sp|Q15020|SART3_HUMAN Squamous cell carcinoma antigen recognized by T-cells 3 OS=Homo sapiens GN=SART3 PE=1 SV=1;tr|F8VV04|F8VV04_HUMAN Squamous cell carcinoma antigen recognized by T-	1454900000	571410000	1164000000	55971000	25525000	10025000	20421000	1157000000	1557600000	1082500000	30	29	29	35.8	35.2	35.2	105.58	0	104.08	3190300000	50	8	20	15	16	19	14	16	19	14	16	28.9	16.9	21.8	19	15	16
417	B7ZKQ9;Q8WTV0-4;Q8WTV0-2;Q8WTV0-5;Q8WTV0;F5H4X0;Q8WTV0-3;F5H5E8	B7ZKQ9;Q8WTV0-4;Q8WTV0-2;Q8WTV0-5;Q8WTV0;F5H4X0;Q8WTV0-3	Scavenger receptor class B member 1	SCARB1	tr|B7ZKQ9|B7ZKQ9_HUMAN SCARB1 protein OS=Homo sapiens GN=SCARB1 PE=1 SV=1;sp|Q8WTV0-4|SCRB1_HUMAN Isoform 4 of Scavenger receptor class B member 1 OS=Homo sapiens GN=SCARB1;sp|Q8WTV0-2|SCRB1_HUMAN Isoform 1 of Scavenger receptor class B member 1 OS=Homo sa	7199400000	1688300000	6308000000	690710000	327250000	76740000	286730000	6143000000	5258200000	5334400000	17	17	17	34.3	34.3	34.3	53.847	0	106.54	15196000000	76	8	16	11	16	16	11	16	16	11	16	33.9	23.5	32.6	27	21	28
418	B7ZL88;Q8N8Q8;Q8N8Q8-2;Q8N8Q8-3;Q8N8Q8-4	B7ZL88;Q8N8Q8	Mitochondrial inner membrane protein COX18	COX18	tr|B7ZL88|B7ZL88_HUMAN COX18 protein OS=Homo sapiens GN=COX18 PE=2 SV=1;sp|Q8N8Q8|COX18_HUMAN Mitochondrial inner membrane protein COX18 OS=Homo sapiens GN=COX18 PE=2 SV=1	499240000	153700000	522340000	83948000	35660000	10979000	37310000	281350000	695420000	340740000	7	7	7	20.4	20.4	20.4	37.133	0	14.041	1175300000	14	5	5	3	6	5	3	6	5	3	6	15.6	10.5	15.3	6	3	5
419	J3QKR5;B7ZVY7;J3QR44;P21127-8;P21127-3;P21127-2;P21127;J3QR29;P21127-6;P21127-9;P21127-12;P21127-4;P21127-5;P21127-10;Q9UQ88-9;Q9UQ88-8;J3KS35;E7ESP2;Q5QPQ9;E9PFJ2;A0A087WYI9;A0A087X1I0;Q13882	J3QKR5;B7ZVY7;J3QR44;P21127-8;P21127-3;P21127-2;P21127;J3QR29;P21127-6;P21127-9;P21127-12;P21127-4;P21127-5;P21127-10;Q9UQ88-9	Cyclin-dependent kinase 11B;Cyclin-dependent kinase 11A	CDK11B;CDC2L1;CDK11A	tr|J3QKR5|J3QKR5_HUMAN Cyclin-dependent kinase 11B OS=Homo sapiens GN=CDK11B PE=1 SV=2;tr|B7ZVY7|B7ZVY7_HUMAN Cell division cycle 2-like 1 (PITSLRE proteins) OS=Homo sapiens GN=CDC2L1 PE=1 SV=1;tr|J3QR44|J3QR44_HUMAN Cyclin-dependent kinase 11B OS=Homo sap	1345300000	357740000	726480000	55216000	30575000	8130400	16511000	1004000000	956460000	772380000	18	18	2	22.1	22.1	2.6	91.008	0	30.918	2429500000	42	23	15	10	12	15	10	12	1	2	1	20	12.8	15.5	19	11	12
420	C9JEL3;B9A044;B8ZZ50;O60573-2;O60573	C9JEL3;B9A044;B8ZZ50;O60573-2;O60573	Eukaryotic translation initiation factor 4E type 2	EIF4E2	tr|C9JEL3|C9JEL3_HUMAN Eukaryotic translation initiation factor 4E type 2 (Fragment) OS=Homo sapiens GN=EIF4E2 PE=1 SV=1;tr|B9A044|B9A044_HUMAN Eukaryotic translation initiation factor 4E type 2 OS=Homo sapiens GN=EIF4E2 PE=1 SV=1;tr|B8ZZ50|B8ZZ50_HUMAN Eu	168890000	0	132730000	25135000	14074000	0	11061000	154110000	0	141920000	3	3	3	23.9	23.9	23.9	24.602	0	22.913	301620000	8	5	3	0	3	3	0	3	3	0	3	23.9	0	23.9	4	0	4
421	B8ZZ87;Q6P582;Q6NZ67;H7C173;H7C202;H7BZ50	B8ZZ87;Q6P582;Q6NZ67;H7C173;H7C202;H7BZ50	Mitotic-spindle organizing protein 2A;Mitotic-spindle organizing protein 2B	MZT2B;MZT2A	tr|B8ZZ87|B8ZZ87_HUMAN Mitotic-spindle organizing protein 2B OS=Homo sapiens GN=MZT2B PE=1 SV=1;sp|Q6P582|MZT2A_HUMAN Mitotic-spindle organizing protein 2A OS=Homo sapiens GN=MZT2A PE=1 SV=2;sp|Q6NZ67|MZT2B_HUMAN Mitotic-spindle organizing protein 2B OS=Ho	55189000	2034900	44492000	7824400	4245300	156530	3422500	39360000	15534000	35435000	4	4	4	28.9	28.9	28.9	22.281	0	12.951	101720000	8	6	4	1	3	4	1	3	4	1	3	28.9	3.2	19.3	4	1	3
422	B8ZZF5;Q9H8M9;C9J5M4	B8ZZF5;Q9H8M9;C9J5M4	Protein eva-1 homolog A	EVA1A	tr|B8ZZF5|B8ZZF5_HUMAN Protein eva-1 homolog A OS=Homo sapiens GN=EVA1A PE=4 SV=1;sp|Q9H8M9|EVA1A_HUMAN Protein eva-1 homolog A OS=Homo sapiens GN=EVA1A PE=2 SV=1;tr|C9J5M4|C9J5M4_HUMAN Protein eva-1 homolog A (Fragment) OS=Homo sapiens GN=EVA1A PE=4 SV=3	16327000	0	190230000	29508000	2332400	0	27176000	0	0	214130000	2	2	2	17.9	17.9	17.9	16.163	0	9.9639	206560000	3	3	2	1	1	2	1	1	2	1	1	17.9	7.9	7.9	1	1	1
423	B8ZZF8;Q9Y4Y9	B8ZZF8;Q9Y4Y9	U6 snRNA-associated Sm-like protein LSm5	LSM5	tr|B8ZZF8|B8ZZF8_HUMAN U6 snRNA-associated Sm-like protein LSm5 OS=Homo sapiens GN=LSM5 PE=1 SV=1;sp|Q9Y4Y9|LSM5_HUMAN U6 snRNA-associated Sm-like protein LSm5 OS=Homo sapiens GN=LSM5 PE=1 SV=3	526910000	202680000	671230000	350210000	131730000	50671000	167810000	320140000	546310000	473940000	1	1	1	29.7	29.7	29.7	7.0202	0	7.6963	1400800000	8	2	1	1	1	1	1	1	1	1	1	29.7	29.7	29.7	2	3	3
424	B8ZZI9;Q6ULP2-3;Q6ULP2-5;Q6ULP2-2;Q6ULP2-4;Q6ULP2	B8ZZI9;Q6ULP2-3;Q6ULP2-5;Q6ULP2-2;Q6ULP2-4;Q6ULP2	Aftiphilin	AFTPH	tr|B8ZZI9|B8ZZI9_HUMAN Uncharacterized protein OS=Homo sapiens GN=AFTPH PE=1 SV=1;sp|Q6ULP2-3|AFTIN_HUMAN Isoform 3 of Aftiphilin OS=Homo sapiens GN=AFTPH;sp|Q6ULP2-5|AFTIN_HUMAN Isoform 5 of Aftiphilin OS=Homo sapiens GN=AFTPH;sp|Q6ULP2-2|AFTIN_HUMAN Isof	28866000	0	20263000	2047000	1202700	0	844300	23899000	0	18069000	1	1	1	3.9	3.9	3.9	61.488	0	10.505	49129000	2	6	1	0	1	1	0	1	1	0	1	3.9	0	3.9	1	0	1
425	B8ZZJ1;Q9BYI3;H7C0W7;B8ZZA2	B8ZZJ1;Q9BYI3;H7C0W7;B8ZZA2	Hyccin	FAM126A	tr|B8ZZJ1|B8ZZJ1_HUMAN Uncharacterized protein OS=Homo sapiens GN=FAM126A PE=4 SV=1;sp|Q9BYI3|HYCCI_HUMAN Hyccin OS=Homo sapiens GN=FAM126A PE=1 SV=2;tr|H7C0W7|H7C0W7_HUMAN Hyccin (Fragment) OS=Homo sapiens GN=FAM126A PE=4 SV=1;tr|B8ZZA2|B8ZZA2_HUMAN Hycci	86284000	19106000	40558000	6345600	3751500	830710	1763400	0	54205000	31686000	4	4	4	15.8	15.8	15.8	46.919	0	10.479	145950000	4	4	2	1	2	2	1	2	2	1	2	7.6	5.3	8.1	2	1	1
426	M0QZK8;H7BZK5;B8ZZK2;O75223	M0QZK8;H7BZK5;B8ZZK2;O75223	Gamma-glutamylcyclotransferase	GGCT	tr|M0QZK8|M0QZK8_HUMAN Gamma-glutamylcyclotransferase OS=Homo sapiens GN=GGCT PE=1 SV=1;tr|H7BZK5|H7BZK5_HUMAN Gamma-glutamylcyclotransferase (Fragment) OS=Homo sapiens GN=GGCT PE=1 SV=1;tr|B8ZZK2|B8ZZK2_HUMAN Gamma-glutamylcyclotransferase OS=Homo sapiens	0	16568000	35331000	5766600	0	1840900	3925700	0	0	29114000	2	2	2	29.1	29.1	29.1	11.578	0.00017832	3.6818	51899000	2	4	0	1	1	0	1	1	0	1	1	0	12.6	16.5	0	1	1
427	B8ZZK5;C9IZ52;O43924	B8ZZK5;C9IZ52;O43924	Retinal rod rhodopsin-sensitive cGMP 3,5-cyclic phosphodiesterase subunit delta	PDE6D	tr|B8ZZK5|B8ZZK5_HUMAN Phosphodiesterase 6D, cGMP-specific, rod, delta, isoform CRA_a OS=Homo sapiens GN=PDE6D PE=1 SV=1;tr|C9IZ52|C9IZ52_HUMAN Retinal rod rhodopsin-sensitive cGMP 3,5-cyclic phosphodiesterase subunit delta (Fragment) OS=Homo sapiens GN=	27939000	0	0	5587800	5587800	0	0	25709000	0	0	1	1	1	20.4	20.4	20.4	10.759	0.0022657	2.0563	27939000	1	3	1	0	0	1	0	0	1	0	0	20.4	0	0	1	0	0
428	B8ZZN6;P63165;B8ZZJ0;B8ZZ67;B9A032;P63165-2	B8ZZN6;P63165;B8ZZJ0;B8ZZ67;B9A032;P63165-2	Small ubiquitin-related modifier 1	SUMO1	tr|B8ZZN6|B8ZZN6_HUMAN Small ubiquitin-related modifier 1 OS=Homo sapiens GN=SUMO1 PE=1 SV=1;sp|P63165|SUMO1_HUMAN Small ubiquitin-related modifier 1 OS=Homo sapiens GN=SUMO1 PE=1 SV=1;tr|B8ZZJ0|B8ZZJ0_HUMAN Small ubiquitin-related modifier 1 OS=Homo sapie	1091200000	549770000	793830000	187290000	83939000	42290000	61064000	1021500000	992930000	806590000	5	5	5	35.6	35.6	35.6	16.645	0	13.388	2434800000	21	6	5	4	4	5	4	4	5	4	4	35.6	30.1	30.1	7	7	7
429	B8ZZQ6;P06454-2;P06454;B8ZZA1;B8ZZW7;H7C2N1;A0A087WUT1	B8ZZQ6;P06454-2;P06454;B8ZZA1;B8ZZW7;H7C2N1;A0A087WUT1	Prothymosin alpha;Prothymosin alpha, N-terminally processed;Thymosin alpha-1	PTMA	tr|B8ZZQ6|B8ZZQ6_HUMAN Uncharacterized protein OS=Homo sapiens GN=PTMA PE=1 SV=1;sp|P06454-2|PTMA_HUMAN Isoform 2 of Prothymosin alpha OS=Homo sapiens GN=PTMA;sp|P06454|PTMA_HUMAN Prothymosin alpha OS=Homo sapiens GN=PTMA PE=1 SV=2;tr|B8ZZA1|B8ZZA1_HUMAN T	645040000	437330000	698750000	593710000	215010000	145780000	232920000	556620000	1096500000	610060000	6	6	6	40.2	40.2	40.2	11.758	0	35.443	1781100000	29	7	4	5	4	4	5	4	4	5	4	29	40.2	29.9	9	11	9
430	B8ZZS4;Q9H8Y5	B8ZZS4;Q9H8Y5	Ankyrin repeat and zinc finger domain-containing protein 1	ANKZF1	tr|B8ZZS4|B8ZZS4_HUMAN Ankyrin repeat and zinc finger domain-containing protein 1 OS=Homo sapiens GN=ANKZF1 PE=1 SV=1;sp|Q9H8Y5|ANKZ1_HUMAN Ankyrin repeat and zinc finger domain-containing protein 1 OS=Homo sapiens GN=ANKZF1 PE=1 SV=1	48335000	0	130550000	5770600	1559200	0	4211400	77197000	0	92744000	5	5	5	12.6	12.6	12.6	57.572	0	9.1644	178890000	8	2	3	0	5	3	0	5	3	0	5	7.9	0	12.6	3	0	5
431	B8ZZX2;B8ZZV9;Q9H8M1-2;Q9H8M1	B8ZZX2;B8ZZV9;Q9H8M1-2;Q9H8M1	Coenzyme Q-binding protein COQ10 homolog B, mitochondrial	COQ10B	tr|B8ZZX2|B8ZZX2_HUMAN Coenzyme Q-binding protein COQ10 homolog B, mitochondrial OS=Homo sapiens GN=COQ10B PE=4 SV=1;tr|B8ZZV9|B8ZZV9_HUMAN Coenzyme Q-binding protein COQ10 homolog B, mitochondrial OS=Homo sapiens GN=COQ10B PE=4 SV=1;sp|Q9H8M1-2|CQ10B_HUMA	220680000	0	55952000	17289000	13792000	0	3497000	0	0	54321000	4	4	4	25.5	25.5	25.5	21.337	0.00082522	2.3876	276630000	4	4	1	0	3	1	0	3	1	0	3	9	0	16.5	1	0	3
432	B8ZZW4;P14778;B8ZZ73;C9JW84;C9J686;C9JWB2;F8WF92;H7BZM5;B9A040;C9JQ36;C9J3W8	B8ZZW4;P14778;B8ZZ73	Interleukin-1 receptor type 1;Interleukin-1 receptor type 1, membrane form;Interleukin-1 receptor type 1, soluble form	IL1R1	tr|B8ZZW4|B8ZZW4_HUMAN Interleukin-1 receptor type 1 OS=Homo sapiens GN=IL1R1 PE=4 SV=1;sp|P14778|IL1R1_HUMAN Interleukin-1 receptor type 1 OS=Homo sapiens GN=IL1R1 PE=1 SV=1;tr|B8ZZ73|B8ZZ73_HUMAN Interleukin-1 receptor type 1 OS=Homo sapiens GN=IL1R1 PE=	53275000	0	70705000	3542300	1522200	0	2020100	39800000	0	56729000	3	3	3	7.4	7.4	7.4	62.028	0.00050058	2.5929	123980000	3	11	2	0	2	2	0	2	2	0	2	5.8	0	5.9	1	0	2
433	B9A057;Q86WW8	B9A057;Q86WW8	Cytochrome c oxidase assembly factor 5	COA5	tr|B9A057|B9A057_HUMAN Cytochrome c oxidase assembly factor 5 OS=Homo sapiens GN=COA5 PE=4 SV=1;sp|Q86WW8|COA5_HUMAN Cytochrome c oxidase assembly factor 5 OS=Homo sapiens GN=COA5 PE=1 SV=1	25268000	43193000	95871000	32866000	5053600	8638500	19174000	51049000	60313000	118380000	3	3	3	54.8	54.8	54.8	8.0572	0	17.446	164330000	6	2	1	2	2	1	2	2	1	2	2	24.7	45.2	34.2	1	3	2
434	J3KMX2;B9EGA3;Q92925-3;Q92925;Q92925-2;J3QWB6;J3QQL7;C9JYI7	J3KMX2;B9EGA3;Q92925-3;Q92925;Q92925-2;J3QWB6	SWI/SNF-related matrix-associated actin-dependent regulator of chromatin subfamily D member 2	SMARCD2	tr|J3KMX2|J3KMX2_HUMAN SWI/SNF-related matrix-associated actin-dependent regulator of chromatin subfamily D member 2 OS=Homo sapiens GN=SMARCD2 PE=1 SV=1;tr|B9EGA3|B9EGA3_HUMAN SMARCD2 protein OS=Homo sapiens GN=SMARCD2 PE=1 SV=1;sp|Q92925-3|SMRD2_HUMAN Is	1791500000	573640000	1671300000	130210000	57791000	18505000	53914000	1280700000	1595800000	1335000000	20	20	17	54.6	54.6	46.9	52.238	0	104.36	4036500000	81	8	18	13	15	18	13	15	15	11	12	53.1	35.5	45.2	29	20	32
435	E6ZCI6;C0MHM2;D3DWC4;Q86VZ5	E6ZCI6;C0MHM2;D3DWC4;Q86VZ5	Phosphatidylcholine:ceramide cholinephosphotransferase 1	SGMS1;TMEM23	tr|E6ZCI6|E6ZCI6_HUMAN Phosphatidylcholine:ceramide cholinephosphotransferase 1 OS=Homo sapiens GN=SGMS1 PE=2 SV=1;tr|C0MHM2|C0MHM2_HUMAN Phosphatidylcholine:ceramide cholinephosphotransferase 1 OS=Homo sapiens GN=SGMS1 PE=2 SV=1;tr|D3DWC4|D3DWC4_HUMAN Pho	123060000	0	46127000	14099000	10255000	0	3843900	92842000	0	43464000	3	3	3	15.1	15.1	15.1	25.346	0	6.4958	169190000	4	4	2	0	2	2	0	2	2	0	2	7.8	0	11.4	2	0	2
436	H0YN34;C4B7M2;Q96JI7-2;Q96JI7-3;Q96JI7	H0YN34;C4B7M2;Q96JI7-2;Q96JI7-3;Q96JI7	Spatacsin	SPG11	tr|H0YN34|H0YN34_HUMAN Spatacsin OS=Homo sapiens GN=SPG11 PE=4 SV=1;tr|C4B7M2|C4B7M2_HUMAN Spatacsin OS=Homo sapiens GN=SPG11 PE=1 SV=1;sp|Q96JI7-2|SPTCS_HUMAN Isoform 2 of Spatacsin OS=Homo sapiens GN=SPG11;sp|Q96JI7-3|SPTCS_HUMAN Isoform 3 of Spatacsin O	74841000	0	10952000	1995200	1740500	0	254690	57644000	0	12011000	3	3	3	5.8	5.8	5.8	87.25	0	5.0799	85792000	6	5	3	0	1	3	0	1	3	0	1	5.8	0	2.2	4	0	2
437	C9IZ04;Q9NY27;F8WDK3;C9IZF4;F8WCA1;Q9NY27-2;Q9NY27-3	C9IZ04;Q9NY27;F8WDK3;C9IZF4;F8WCA1;Q9NY27-2;Q9NY27-3	Serine/threonine-protein phosphatase 4 regulatory subunit 2	PPP4R2	tr|C9IZ04|C9IZ04_HUMAN Serine/threonine-protein phosphatase 4 regulatory subunit 2 (Fragment) OS=Homo sapiens GN=PPP4R2 PE=1 SV=1;sp|Q9NY27|PP4R2_HUMAN Serine/threonine-protein phosphatase 4 regulatory subunit 2 OS=Homo sapiens GN=PPP4R2 PE=1 SV=3;tr|F8WDK	100780000	21604000	83532000	13728000	6718900	1440300	5568800	75180000	83514000	62751000	2	2	2	13.7	13.7	13.7	25.621	0	5.5115	205920000	7	7	2	1	2	2	1	2	2	1	2	13.7	6.6	13.7	4	1	2
438	C9J014;C9J271;Q9Y5X2;C9J8E6	C9J014;C9J271;Q9Y5X2;C9J8E6	Sorting nexin-8	SNX8	tr|C9J014|C9J014_HUMAN Sorting nexin-8 (Fragment) OS=Homo sapiens GN=SNX8 PE=4 SV=1;tr|C9J271|C9J271_HUMAN Sorting nexin-8 (Fragment) OS=Homo sapiens GN=SNX8 PE=4 SV=1;sp|Q9Y5X2|SNX8_HUMAN Sorting nexin-8 OS=Homo sapiens GN=SNX8 PE=1 SV=1;tr|C9J8E6|C9J8E6_	84862000	38458000	36043000	13280000	7071800	3204800	3003600	60523000	139770000	18488000	4	4	4	29	29	29	20.531	0	9.0458	159360000	7	4	4	2	2	4	2	2	4	2	2	29	15.3	17	4	2	1
439	C9JR84;C9J038;Q9GZV5	C9JR84;C9J038;Q9GZV5	WW domain-containing transcription regulator protein 1	WWTR1	tr|C9JR84|C9JR84_HUMAN WW domain-containing transcription regulator protein 1 (Fragment) OS=Homo sapiens GN=WWTR1 PE=1 SV=1;tr|C9J038|C9J038_HUMAN WW domain-containing transcription regulator protein 1 (Fragment) OS=Homo sapiens GN=WWTR1 PE=1 SV=1;sp|Q9GZV	0	0	25989000	4331500	0	0	4331500	0	0	24492000	1	1	1	20.3	20.3	20.3	14.55	0	6.2714	25989000	1	3	0	0	1	0	0	1	0	0	1	0	0	20.3	0	0	1
440	C9J069	C9J069	Uncharacterized protein C9orf172	C9orf172	sp|C9J069|CI172_HUMAN Uncharacterized protein C9orf172 OS=Homo sapiens GN=C9orf172 PE=3 SV=1	16256000	0	0	258040	258040	0	0	11546000	0	0	1	1	1	1.8	1.8	1.8	106.65	0	7.3191	16256000	1	1	1	0	0	1	0	0	1	0	0	1.8	0	0	1	0	0
441	C9J0I9;Q86WB0-2;Q86WB0;Q86WB0-3;C9J672	C9J0I9;Q86WB0-2;Q86WB0;Q86WB0-3	Nuclear-interacting partner of ALK	ZC3HC1	tr|C9J0I9|C9J0I9_HUMAN Nuclear-interacting partner of ALK OS=Homo sapiens GN=ZC3HC1 PE=1 SV=1;sp|Q86WB0-2|NIPA_HUMAN Isoform 2 of Nuclear-interacting partner of ALK OS=Homo sapiens GN=ZC3HC1;sp|Q86WB0|NIPA_HUMAN Nuclear-interacting partner of ALK OS=Homo s	289900000	78080000	228130000	20555000	9996400	2692400	7866600	219610000	242560000	189130000	10	10	10	30.1	30.1	30.1	50.562	0	16.876	596110000	19	5	8	4	6	8	4	6	8	4	6	25.1	10.7	18.3	8	4	7
442	C9J0J0;Q96EE4	C9J0J0;Q96EE4	Coiled-coil domain-containing protein 126	CCDC126	tr|C9J0J0|C9J0J0_HUMAN Coiled-coil domain-containing protein 126 (Fragment) OS=Homo sapiens GN=CCDC126 PE=4 SV=3;sp|Q96EE4|CC126_HUMAN Coiled-coil domain-containing protein 126 OS=Homo sapiens GN=CCDC126 PE=2 SV=2	59679000	0	41971000	12706000	7459900	0	5246400	56386000	0	28749000	1	1	1	10.8	10.8	10.8	12.768	0	5.3587	101650000	3	2	1	0	1	1	0	1	1	0	1	10.8	0	10.8	1	0	2
443	C9J0J7;G5E9Q6;P35080-2;C9J712;C9JQ45;P35080	C9J0J7;G5E9Q6;P35080-2;C9J712;C9JQ45;P35080	Profilin;Profilin-2	PFN2	tr|C9J0J7|C9J0J7_HUMAN Profilin-2 OS=Homo sapiens GN=PFN2 PE=1 SV=1;tr|G5E9Q6|G5E9Q6_HUMAN Profilin OS=Homo sapiens GN=PFN2 PE=1 SV=1;sp|P35080-2|PROF2_HUMAN Isoform IIb of Profilin-2 OS=Homo sapiens GN=PFN2;tr|C9J712|C9J712_HUMAN Profilin-2 OS=Homo sapien	168870000	133520000	168550000	78489000	28145000	22253000	28091000	142140000	351400000	174920000	2	2	2	25.3	25.3	25.3	9.8402	0	5.6871	470940000	5	6	2	1	2	2	1	2	2	1	2	25.3	15.4	25.3	2	2	1
444	C9J7T7;C9JE98;C9J0Q5;C9JFD3;Q9Y618-5;Q9Y618-4;Q9Y618-3;Q9Y618;H7C1J7;Q9Y618-2	C9J7T7;C9JE98;C9J0Q5;C9JFD3;Q9Y618-5;Q9Y618-4;Q9Y618-3;Q9Y618;H7C1J7;Q9Y618-2	Nuclear receptor corepressor 2	NCOR2	tr|C9J7T7|C9J7T7_HUMAN Nuclear receptor corepressor 2 OS=Homo sapiens GN=NCOR2 PE=1 SV=3;tr|C9JE98|C9JE98_HUMAN Nuclear receptor corepressor 2 OS=Homo sapiens GN=NCOR2 PE=1 SV=1;tr|C9J0Q5|C9J0Q5_HUMAN Nuclear receptor corepressor 2 OS=Homo sapiens GN=NCOR2	11155000	0	2635900	112130	90695	0	21430	6676500	0	0	2	2	2	1.9	1.9	1.9	221	0.00017609	3.4297	13791000	1	10	2	0	1	2	0	1	2	0	1	1.9	0	0.7	1	0	0
445	C9J0W1;Q8TE96-3;Q8TE96-2;Q8TE96	C9J0W1;Q8TE96-3;Q8TE96-2;Q8TE96	ATP-dependent RNA helicase DQX1	DQX1	tr|C9J0W1|C9J0W1_HUMAN ATP-dependent RNA helicase DQX1 (Fragment) OS=Homo sapiens GN=DQX1 PE=4 SV=1;sp|Q8TE96-3|DQX1_HUMAN Isoform 3 of ATP-dependent RNA helicase DQX1 OS=Homo sapiens GN=DQX1;sp|Q8TE96-2|DQX1_HUMAN Isoform 2 of ATP-dependent RNA helicase D	39775000	0	19674000	7431100	4971800	0	2459300	25346000	0	22270000	2	2	2	21	21	21	13.242	0.00017658	3.4924	59449000	2	4	2	0	1	2	0	1	2	0	1	21	0	8.4	2	0	0
446	C9J185;E7ER02;Q9NZJ5	C9J185;E7ER02;Q9NZJ5	Eukaryotic translation initiation factor 2-alpha kinase 3	EIF2AK3	tr|C9J185|C9J185_HUMAN Eukaryotic translation initiation factor 2-alpha kinase 3 (Fragment) OS=Homo sapiens GN=EIF2AK3 PE=1 SV=1;tr|E7ER02|E7ER02_HUMAN Eukaryotic translation initiation factor 2-alpha kinase 3 OS=Homo sapiens GN=EIF2AK3 PE=1 SV=1;sp|Q9NZJ5	442330000	94318000	515400000	17534000	7372200	1572000	8589900	379070000	0	422040000	11	11	11	16.1	16.1	16.1	108.92	0	25.62	1052000000	20	3	8	1	8	8	1	8	8	1	8	12.7	1.3	11.3	11	1	8
447	C9J2C0;Q9NY65-2;Q9NY65	C9J2C0;Q9NY65-2;Q9NY65	Tubulin alpha-8 chain	TUBA8	tr|C9J2C0|C9J2C0_HUMAN Tubulin alpha-8 chain (Fragment) OS=Homo sapiens GN=TUBA8 PE=3 SV=1;sp|Q9NY65-2|TBA8_HUMAN Isoform 2 of Tubulin alpha-8 chain OS=Homo sapiens GN=TUBA8;sp|Q9NY65|TBA8_HUMAN Tubulin alpha-8 chain OS=Homo sapiens GN=TUBA8 PE=1 SV=1	34054000	38882000	0	2805200	1309800	1495500	0	42106000	93041000	0	15	1	1	33.8	1.5	1.5	51.984	1	-2	72936000	2	3	15	14	14	1	1	0	1	1	0	33.8	33.6	32.3	1	1	0
448	C9JKD7;C9J4I2;C9JLB5;C9JTV3;C9J2M1;C9J993;C9J3S3;C9J2X7;C9JYD7;C9J6M2;C9JE31;C9JGL4;Q99999	C9JKD7;C9J4I2;C9JLB5;C9JTV3;C9J2M1;C9J993;C9J3S3;C9J2X7;C9JYD7;C9J6M2;C9JE31;C9JGL4;Q99999	Galactosylceramide sulfotransferase	GAL3ST1	tr|C9JKD7|C9JKD7_HUMAN Galactosylceramide sulfotransferase (Fragment) OS=Homo sapiens GN=GAL3ST1 PE=4 SV=3;tr|C9J4I2|C9J4I2_HUMAN Galactosylceramide sulfotransferase (Fragment) OS=Homo sapiens GN=GAL3ST1 PE=4 SV=1;tr|C9JLB5|C9JLB5_HUMAN Galactosylceramide	14780000	0	0	2956100	2956100	0	0	8502700	0	0	1	1	1	12.1	12.1	12.1	10.566	0	4.5361	14780000	1	13	1	0	0	1	0	0	1	0	0	12.1	0	0	1	0	0
449	C9J2P9;Q75N03-2;Q75N03	C9J2P9;Q75N03-2;Q75N03	E3 ubiquitin-protein ligase Hakai	CBLL1	tr|C9J2P9|C9J2P9_HUMAN E3 ubiquitin-protein ligase Hakai (Fragment) OS=Homo sapiens GN=CBLL1 PE=1 SV=3;sp|Q75N03-2|HAKAI_HUMAN Isoform 2 of E3 ubiquitin-protein ligase Hakai OS=Homo sapiens GN=CBLL1;sp|Q75N03|HAKAI_HUMAN E3 ubiquitin-protein ligase Hakai O	82046000	24977000	97928000	11386000	4558100	1387600	5440400	71871000	64878000	82730000	1	1	1	6.2	6.2	6.2	36.398	0	11.857	204950000	4	3	1	1	1	1	1	1	1	1	1	6.2	6.2	6.2	2	1	1
450	C9J2Y9;P30876;C9J4M6;C9JMN3;C9JZW8	C9J2Y9;P30876;C9J4M6	DNA-directed RNA polymerase;DNA-directed RNA polymerase II subunit RPB2	POLR2B	tr|C9J2Y9|C9J2Y9_HUMAN DNA-directed RNA polymerase OS=Homo sapiens GN=POLR2B PE=1 SV=2;sp|P30876|RPB2_HUMAN DNA-directed RNA polymerase II subunit RPB2 OS=Homo sapiens GN=POLR2B PE=1 SV=1;tr|C9J4M6|C9J4M6_HUMAN DNA-directed RNA polymerase OS=Homo sapiens G	4234600000	1291900000	3875600000	128800000	58008000	17698000	53090000	3484000000	3562700000	3474000000	45	45	45	51	51	51	133.06	0	234.88	9402100000	127	5	36	26	34	36	26	34	36	26	34	42.3	27.2	36.6	46	30	51
451	C9J3D7;Q9UKG9;Q9UKG9-3;Q9UKG9-2	C9J3D7;Q9UKG9;Q9UKG9-3	Peroxisomal carnitine O-octanoyltransferase	CROT	tr|C9J3D7|C9J3D7_HUMAN Peroxisomal carnitine O-octanoyltransferase OS=Homo sapiens GN=CROT PE=1 SV=1;sp|Q9UKG9|OCTC_HUMAN Peroxisomal carnitine O-octanoyltransferase OS=Homo sapiens GN=CROT PE=1 SV=2;sp|Q9UKG9-3|OCTC_HUMAN Isoform 3 of Peroxisomal carnitin	355500000	94052000	221420000	19171000	10157000	2687200	6326400	255160000	246430000	197650000	8	8	8	21.8	21.8	21.8	65.883	0	20.004	670980000	21	4	7	3	6	7	3	6	7	3	6	19.2	8.5	14.5	7	5	9
452	C9J3F6;Q92609;Q92609-2	C9J3F6;Q92609;Q92609-2	TBC1 domain family member 5	TBC1D5	tr|C9J3F6|C9J3F6_HUMAN TBC1 domain family member 5 OS=Homo sapiens GN=TBC1D5 PE=1 SV=1;sp|Q92609|TBCD5_HUMAN TBC1 domain family member 5 OS=Homo sapiens GN=TBC1D5 PE=1 SV=1;sp|Q92609-2|TBCD5_HUMAN Isoform 2 of TBC1 domain family member 5 OS=Homo sapiens GN	156900000	3080900	131140000	9704000	5229900	102700	4371500	137170000	18829000	103730000	4	4	4	8.8	8.8	8.8	67.534	0	43.97	291120000	9	3	3	1	4	3	1	4	3	1	4	6.9	1.3	8.8	5	0	4
453	C9J3R8;O60513;E7ETS9;C9J5S0;C9J4S5	C9J3R8;O60513;E7ETS9	Beta-1,4-galactosyltransferase 4;N-acetyllactosamine synthase;Lactotriaosylceramide beta-1,4-galactosyltransferase	B4GALT4	tr|C9J3R8|C9J3R8_HUMAN N-acetyllactosamine synthase OS=Homo sapiens GN=B4GALT4 PE=4 SV=1;sp|O60513|B4GT4_HUMAN Beta-1,4-galactosyltransferase 4 OS=Homo sapiens GN=B4GALT4 PE=1 SV=1;tr|E7ETS9|E7ETS9_HUMAN N-acetyllactosamine synthase OS=Homo sapiens GN=B4GA	216310000	33155000	204420000	22694000	10815000	1657700	10221000	192550000	80322000	169890000	4	4	4	18.9	18.9	18.9	35.047	0	8.187	453880000	11	5	4	1	3	4	1	3	4	1	3	18.9	6	14.6	5	2	4
454	C9J494;Q9H000-2;Q9H000	C9J494;Q9H000-2;Q9H000	Probable E3 ubiquitin-protein ligase makorin-2	MKRN2	tr|C9J494|C9J494_HUMAN Probable E3 ubiquitin-protein ligase makorin-2 OS=Homo sapiens GN=MKRN2 PE=1 SV=1;sp|Q9H000-2|MKRN2_HUMAN Isoform 2 of Probable E3 ubiquitin-protein ligase makorin-2 OS=Homo sapiens GN=MKRN2;sp|Q9H000|MKRN2_HUMAN Probable E3 ubiquiti	35943000	0	27856000	2278500	1283700	0	994860	35943000	0	30568000	1	1	1	4.6	4.6	4.6	46.68	0.00034388	3.0081	63799000	2	3	1	0	1	1	0	1	1	0	1	4.6	0	4.6	1	0	1
455	C9J4K0;Q9BVC5-2;Q9BVC5	C9J4K0;Q9BVC5-2;Q9BVC5	Ashwin	C2orf49	tr|C9J4K0|C9J4K0_HUMAN Ashwin OS=Homo sapiens GN=C2orf49 PE=1 SV=1;sp|Q9BVC5-2|ASHWN_HUMAN Isoform 2 of Ashwin OS=Homo sapiens GN=C2orf49;sp|Q9BVC5|ASHWN_HUMAN Ashwin OS=Homo sapiens GN=C2orf49 PE=1 SV=1	79893000	0	0	6145600	6145600	0	0	50900000	0	0	3	3	3	29.5	29.5	29.5	21.356	0	7.8357	79893000	3	3	3	0	0	3	0	0	3	0	0	29.5	0	0	3	0	0
456	C9J4Z3;P61513;M0R0A1;Q6P4E4;E9PEL3;M0R2L6;G5E9R3;A6NKH3	C9J4Z3;P61513;M0R0A1;Q6P4E4;E9PEL3;M0R2L6;G5E9R3	60S ribosomal protein L37a	RPL37A	tr|C9J4Z3|C9J4Z3_HUMAN 60S ribosomal protein L37a OS=Homo sapiens GN=RPL37A PE=1 SV=1;sp|P61513|RL37A_HUMAN 60S ribosomal protein L37a OS=Homo sapiens GN=RPL37A PE=1 SV=2;tr|M0R0A1|M0R0A1_HUMAN 60S ribosomal protein L37a OS=Homo sapiens GN=RPL37A PE=1 SV=1	4684600000	2052000000	4821500000	2889500000	1171200000	512990000	1205400000	3838400000	4333500000	4801700000	4	4	4	69.1	69.1	69.1	7.624	0	22.055	11558000000	74	8	4	3	4	4	3	4	4	3	4	69.1	55.9	69.1	30	14	30
457	C9JDY4;C9J5J2;C9JE02;H7C5G1;Q2TAA2-2;Q2TAA2	C9JDY4;C9J5J2;C9JE02;H7C5G1;Q2TAA2-2;Q2TAA2	Isoamyl acetate-hydrolyzing esterase 1 homolog	IAH1	tr|C9JDY4|C9JDY4_HUMAN Isoamyl acetate-hydrolyzing esterase 1 homolog (Fragment) OS=Homo sapiens GN=IAH1 PE=1 SV=1;tr|C9J5J2|C9J5J2_HUMAN Isoamyl acetate-hydrolyzing esterase 1 homolog (Fragment) OS=Homo sapiens GN=IAH1 PE=1 SV=1;tr|C9JE02|C9JE02_HUMAN Iso	94454000	0	69246000	40925000	23613000	0	17311000	62463000	0	65217000	1	1	1	51.1	51.1	51.1	5.3162	0	17.558	163700000	3	6	1	0	1	1	0	1	1	0	1	51.1	0	51.1	2	0	1
458	C9J5X1;P08069;H0YNR0;H0YMJ5;H3BSZ8;P14616	C9J5X1;P08069	Tyrosine-protein kinase receptor;Insulin-like growth factor 1 receptor;Insulin-like growth factor 1 receptor alpha chain;Insulin-like growth factor 1 receptor beta chain	IGF1R	tr|C9J5X1|C9J5X1_HUMAN Tyrosine-protein kinase receptor OS=Homo sapiens GN=IGF1R PE=1 SV=1;sp|P08069|IGF1R_HUMAN Insulin-like growth factor 1 receptor OS=Homo sapiens GN=IGF1R PE=1 SV=1	1979100000	334740000	835480000	41439000	26041000	4404500	10993000	1288700000	850860000	1175000000	32	29	29	33.9	31.8	31.8	154.79	0	135.58	3149300000	63	6	28	10	14	26	9	13	26	9	13	29.9	9.4	15.5	29	11	23
459	C9J5X2;C9JRN9;Q8WWR8;Q8WWR8-2;Q8WWR8-3;C9J2V4;C9JEA3;F8WE58;C9IZG9;C9J2R4	C9J5X2;C9JRN9;Q8WWR8;Q8WWR8-2;Q8WWR8-3;C9J2V4;C9JEA3;F8WE58;C9IZG9;C9J2R4	Sialidase-4	NEU4	tr|C9J5X2|C9J5X2_HUMAN Sialidase-4 (Fragment) OS=Homo sapiens GN=NEU4 PE=4 SV=1;tr|C9JRN9|C9JRN9_HUMAN Sialidase-4 (Fragment) OS=Homo sapiens GN=NEU4 PE=4 SV=1;sp|Q8WWR8|NEUR4_HUMAN Sialidase-4 OS=Homo sapiens GN=NEU4 PE=1 SV=3;sp|Q8WWR8-2|NEUR4_HUMAN Isof	17604000	0	27423000	5003000	1956000	0	3047000	22805000	0	22283000	2	2	2	15.4	15.4	15.4	20.115	0.00034188	2.9352	45027000	3	10	2	0	2	2	0	2	2	0	2	15.4	0	15.4	1	0	2
460	C9J7K9;O15162-2;O15162;C9J0H3;C9JE06;H7C5I5;C9J9P4	C9J7K9;O15162-2;O15162;C9J0H3;C9JE06;H7C5I5;C9J9P4	Phospholipid scramblase 1	PLSCR1	tr|C9J7K9|C9J7K9_HUMAN Phospholipid scramblase 1 OS=Homo sapiens GN=PLSCR1 PE=1 SV=1;sp|O15162-2|PLS1_HUMAN Isoform 2 of Phospholipid scramblase 1 OS=Homo sapiens GN=PLSCR1;sp|O15162|PLS1_HUMAN Phospholipid scramblase 1 OS=Homo sapiens GN=PLSCR1 PE=1 SV=1;	281830000	147640000	221960000	65144000	28183000	14764000	22196000	292210000	254350000	235100000	5	5	5	24.4	24.4	24.4	34.217	0	29.121	651440000	12	7	3	3	3	3	3	3	3	3	3	18	12.9	18	4	4	4
461	C9J8T6;Q14061;H7C4E5	C9J8T6;Q14061;H7C4E5	Cytochrome c oxidase copper chaperone	COX17	tr|C9J8T6|C9J8T6_HUMAN Cytochrome c oxidase copper chaperone OS=Homo sapiens GN=COX17 PE=1 SV=1;sp|Q14061|COX17_HUMAN Cytochrome c oxidase copper chaperone OS=Homo sapiens GN=COX17 PE=1 SV=2;tr|H7C4E5|H7C4E5_HUMAN Cytochrome c oxidase copper chaperone (Fra	217080000	42789000	234150000	82336000	36180000	7131500	39025000	200290000	127180000	253270000	3	3	3	42.9	42.9	42.9	10.853	0	14.91	494020000	6	3	2	1	3	2	1	3	2	1	3	29.6	16.3	42.9	3	1	2
462	C9J974;Q96N46-3;Q96N46-2;Q96N46;C9JBA2;F8WDH5	C9J974;Q96N46-3;Q96N46-2;Q96N46	Tetratricopeptide repeat protein 14	TTC14	tr|C9J974|C9J974_HUMAN Tetratricopeptide repeat protein 14 (Fragment) OS=Homo sapiens GN=TTC14 PE=4 SV=1;sp|Q96N46-3|TTC14_HUMAN Isoform 3 of Tetratricopeptide repeat protein 14 OS=Homo sapiens GN=TTC14;sp|Q96N46-2|TTC14_HUMAN Isoform 2 of Tetratricopeptid	56331000	0	36007000	11542000	7041400	0	4500900	42677000	0	28900000	3	3	3	22.2	22.2	22.2	20.86	0	8.4908	92339000	5	6	3	0	2	3	0	2	3	0	2	22.2	0	15.1	2	0	3
463	C9J9K3;P08865;A6NE09;C9JQR9	C9J9K3;P08865;A6NE09	40S ribosomal protein SA	RPSA;RPSAP58	tr|C9J9K3|C9J9K3_HUMAN 40S ribosomal protein SA (Fragment) OS=Homo sapiens GN=RPSA PE=1 SV=3;sp|P08865|RSSA_HUMAN 40S ribosomal protein SA OS=Homo sapiens GN=RPSA PE=1 SV=4;tr|A6NE09|A6NE09_HUMAN 40S ribosomal protein SA OS=Homo sapiens GN=RPSAP58 PE=3 SV=	19233000000	8619700000	18738000000	3106000000	1282200000	574650000	1249200000	14442000000	17620000000	15254000000	15	15	15	65.5	65.5	65.5	29.505	0	314.2	46591000000	180	4	13	13	13	13	13	13	13	13	13	64.4	60.2	64.4	56	59	65
464	C9JA08;Q96D46;C9IY70;C9IZW9;C9K0C2;C9J0B9	C9JA08;Q96D46;C9IY70;C9IZW9;C9K0C2;C9J0B9	60S ribosomal export protein NMD3	NMD3	tr|C9JA08|C9JA08_HUMAN 60S ribosomal export protein NMD3 OS=Homo sapiens GN=NMD3 PE=1 SV=1;sp|Q96D46|NMD3_HUMAN 60S ribosomal export protein NMD3 OS=Homo sapiens GN=NMD3 PE=1 SV=1;tr|C9IY70|C9IY70_HUMAN 60S ribosomal export protein NMD3 (Fragment) OS=Homo	43168000	19359000	158810000	7632400	1488600	667540	5476300	33639000	62098000	160370000	6	6	6	16.1	16.1	16.1	60.125	0	10.994	221340000	8	6	3	1	4	3	1	4	3	1	4	6.8	5.1	11.5	3	1	4
465	C9JA28;Q9UNL2;Q9UNL2-2	C9JA28;Q9UNL2;Q9UNL2-2	Translocon-associated protein subunit gamma	SSR3	tr|C9JA28|C9JA28_HUMAN Translocon-associated protein subunit gamma OS=Homo sapiens GN=SSR3 PE=1 SV=1;sp|Q9UNL2|SSRG_HUMAN Translocon-associated protein subunit gamma OS=Homo sapiens GN=SSR3 PE=1 SV=1;sp|Q9UNL2-2|SSRG_HUMAN Isoform 2 of Translocon-associate	3760200000	2140700000	4701200000	1767000000	626700000	356780000	783540000	3186100000	4945700000	4799100000	1	1	1	8	8	8	20.161	0	27.761	10602000000	34	3	1	1	1	1	1	1	1	1	1	8	8	8	9	15	10
466	C9JA62;Q6UW56-2;Q6UW56;Q6UW56-3	C9JA62;Q6UW56-2;Q6UW56;Q6UW56-3	All-trans retinoic acid-induced differentiation factor	ATRAID	tr|C9JA62|C9JA62_HUMAN All-trans retinoic acid-induced differentiation factor (Fragment) OS=Homo sapiens GN=ATRAID PE=4 SV=1;sp|Q6UW56-2|ARAID_HUMAN Isoform 2 of All-trans retinoic acid-induced differentiation factor OS=Homo sapiens GN=ATRAID;sp|Q6UW56|ARA	112880000	31112000	95085000	79694000	37628000	10371000	31695000	79172000	118110000	91893000	1	1	1	10.7	10.7	10.7	8.1633	0.0088702	1.4884	239080000	4	4	1	1	1	1	1	1	1	1	1	10.7	10.7	10.7	1	1	2
467	C9JAW5;C9JNU6;Q9Y241;Q9Y241-2;A8MV81	C9JAW5;C9JNU6;Q9Y241;Q9Y241-2	HIG1 domain family member 1A, mitochondrial	HIGD1A	tr|C9JAW5|C9JAW5_HUMAN HIG1 domain family member 1A, mitochondrial OS=Homo sapiens GN=HIGD1A PE=1 SV=1;tr|C9JNU6|C9JNU6_HUMAN HIG1 domain family member 1A, mitochondrial OS=Homo sapiens GN=HIGD1A PE=1 SV=1;sp|Q9Y241|HIG1A_HUMAN HIG1 domain family member 1A	1424400000	1065400000	1135000000	906220000	356110000	266360000	283750000	1289800000	2552300000	1186000000	3	3	3	59	59	59	8.8131	0	49.364	3624900000	22	5	3	1	3	3	1	3	3	1	3	59	21.7	59	7	7	8
468	C9JAX1;Q16595;H7C585;Q16595-2;Q16595-3	C9JAX1;Q16595;H7C585	Frataxin, mitochondrial;Frataxin intermediate form;Frataxin(56-210);Frataxin(78-210);Frataxin mature form	FXN	tr|C9JAX1|C9JAX1_HUMAN Frataxin, mitochondrial OS=Homo sapiens GN=FXN PE=1 SV=1;sp|Q16595|FRDA_HUMAN Frataxin, mitochondrial OS=Homo sapiens GN=FXN PE=1 SV=2;tr|H7C585|H7C585_HUMAN Frataxin, mitochondrial (Fragment) OS=Homo sapiens GN=FXN PE=1 SV=1	1431300000	630790000	1304900000	420880000	178910000	78849000	163120000	1033100000	1421300000	1269600000	6	6	6	55.6	55.6	55.6	14.91	0	17.67	3367000000	20	5	4	4	4	4	4	4	4	4	4	40	38.5	43	5	7	8
469	C9JB28;Q6ZMH5;C9JPS5;C9JIB2;C9JVC6;C9JPS6	C9JB28;Q6ZMH5;C9JPS5	Zinc transporter ZIP5	SLC39A5	tr|C9JB28|C9JB28_HUMAN Zinc transporter ZIP5 (Fragment) OS=Homo sapiens GN=SLC39A5 PE=4 SV=1;sp|Q6ZMH5|S39A5_HUMAN Zinc transporter ZIP5 OS=Homo sapiens GN=SLC39A5 PE=2 SV=3;tr|C9JPS5|C9JPS5_HUMAN Zinc transporter ZIP5 (Fragment) OS=Homo sapiens GN=SLC39A5	86124000	10109000	39985000	17027000	10766000	1263600	4998100	57868000	27172000	0	3	3	3	15.9	15.9	15.9	25.013	0	9.4811	136220000	5	6	2	1	1	2	1	1	2	1	1	10.9	6.7	5	2	1	2
470	C9JBG5;Q8NBJ9;Q8NBJ9-2;F5H8L4;E9PMC3;E9PME7;H0YEI3;E9PPN9	C9JBG5;Q8NBJ9;Q8NBJ9-2;F5H8L4	SID1 transmembrane family member 2	SIDT2	tr|C9JBG5|C9JBG5_HUMAN SID1 transmembrane family member 2 OS=Homo sapiens GN=SIDT2 PE=1 SV=2;sp|Q8NBJ9|SIDT2_HUMAN SID1 transmembrane family member 2 OS=Homo sapiens GN=SIDT2 PE=1 SV=2;sp|Q8NBJ9-2|SIDT2_HUMAN Isoform 2 of SID1 transmembrane family member 2	147430000	14068000	109520000	8212700	4467700	426300	3318600	109490000	48575000	102860000	7	7	7	8.9	8.9	8.9	96.728	0	8.4528	271020000	13	8	5	2	4	5	2	4	5	2	4	6.1	2.3	4.7	6	2	5
471	C9JBI3;P78330;C9JEJ7;F8WD74	C9JBI3;P78330	Phosphoserine phosphatase	PSPH	tr|C9JBI3|C9JBI3_HUMAN Phosphoserine phosphatase (Fragment) OS=Homo sapiens GN=PSPH PE=1 SV=1;sp|P78330|SERB_HUMAN Phosphoserine phosphatase OS=Homo sapiens GN=PSPH PE=1 SV=2	542880000	438100000	702580000	129500000	41760000	33700000	54044000	720270000	632950000	726570000	6	6	6	33.7	33.7	33.7	20.745	0	13.987	1683600000	17	4	4	6	3	4	6	3	4	6	3	25.1	33.7	18.7	4	8	5
472	C9JEU5;C9JC84;P02679-2;P02679;C9JPQ9;C9JU00	C9JEU5;C9JC84;P02679-2;P02679	Fibrinogen gamma chain	FGG	tr|C9JEU5|C9JEU5_HUMAN Fibrinogen gamma chain OS=Homo sapiens GN=FGG PE=1 SV=1;tr|C9JC84|C9JC84_HUMAN Fibrinogen gamma chain OS=Homo sapiens GN=FGG PE=1 SV=1;sp|P02679-2|FIBG_HUMAN Isoform Gamma-A of Fibrinogen gamma chain OS=Homo sapiens GN=FGG;sp|P02679|	2435500000	1266600000	2758100000	222770000	83984000	43676000	95106000	3101300000	2518700000	2102200000	12	12	12	39.8	39.8	39.8	50.322	0	125.52	6460200000	55	6	8	9	11	8	9	11	8	9	11	28.1	31	37.8	13	19	23
473	H0Y6K1;F8WCR6;C9JC87;O00189	H0Y6K1;F8WCR6;C9JC87;O00189	AP-4 complex subunit mu-1	AP4M1	tr|H0Y6K1|H0Y6K1_HUMAN AP-4 complex subunit mu-1 (Fragment) OS=Homo sapiens GN=AP4M1 PE=4 SV=1;tr|F8WCR6|F8WCR6_HUMAN AP-4 complex subunit mu-1 OS=Homo sapiens GN=AP4M1 PE=4 SV=1;tr|C9JC87|C9JC87_HUMAN AP-4 complex subunit mu-1 OS=Homo sapiens GN=AP4M1 PE=	7407300	0	0	529090	529090	0	0	4261200	0	0	1	1	1	9.8	9.8	9.8	21.011	0.00017715	3.5566	7407300	1	4	1	0	0	1	0	0	1	0	0	9.8	0	0	1	0	0
474	E9PNC7;E9PQX9;C9JCC6;Q14919;Q14919-2	E9PNC7;E9PQX9;C9JCC6;Q14919;Q14919-2	Dr1-associated corepressor	DRAP1	tr|E9PNC7|E9PNC7_HUMAN Dr1-associated corepressor (Fragment) OS=Homo sapiens GN=DRAP1 PE=1 SV=3;tr|E9PQX9|E9PQX9_HUMAN Dr1-associated corepressor OS=Homo sapiens GN=DRAP1 PE=1 SV=1;tr|C9JCC6|C9JCC6_HUMAN Dr1-associated corepressor OS=Homo sapiens GN=DRAP1	252200000	113680000	166210000	88682000	42033000	18947000	27702000	288590000	216820000	183050000	2	2	2	14.1	14.1	14.1	16.658	0	4.5012	532090000	9	5	2	2	2	2	2	2	2	2	2	14.1	14.1	14.1	2	4	3
475	C9JDY5;Q99574	C9JDY5;Q99574	Neuroserpin	SERPINI1	tr|C9JDY5|C9JDY5_HUMAN Neuroserpin (Fragment) OS=Homo sapiens GN=SERPINI1 PE=3 SV=1;sp|Q99574|NEUS_HUMAN Neuroserpin OS=Homo sapiens GN=SERPINI1 PE=1 SV=1	15456000	0	0	1545600	1545600	0	0	10978000	0	0	1	1	1	3.7	3.7	3.7	27.747	0.0061475	1.6518	15456000	1	2	1	0	0	1	0	0	1	0	0	3.7	0	0	1	0	0
476	C9JEE7;C9JH61	C9JEE7		WDR43	tr|C9JEE7|C9JEE7_HUMAN WD repeat-containing protein 43 (Fragment) OS=Homo sapiens GN=WDR43 PE=4 SV=1	5813100	0	0	581310	581310	0	0	4173700	0	0	7	1	1	58.5	15.6	15.6	16.278	1	-2	5813100	1	2	7	3	5	1	0	0	1	0	0	58.5	20.4	42.9	1	0	0
477	C9JG97;C9JEH3;Q13685;H7C0R2;C9JTS3	C9JG97;C9JEH3;Q13685;H7C0R2;C9JTS3	Angio-associated migratory cell protein	AAMP	tr|C9JG97|C9JG97_HUMAN Angio-associated migratory cell protein OS=Homo sapiens GN=AAMP PE=1 SV=1;tr|C9JEH3|C9JEH3_HUMAN Angio-associated migratory cell protein OS=Homo sapiens GN=AAMP PE=1 SV=1;sp|Q13685|AAMP_HUMAN Angio-associated migratory cell protein O	0	10265000	10949000	1116500	0	540250	576260	0	0	10042000	2	2	2	5.3	5.3	5.3	44.693	0.0091658	1.4704	21214000	2	5	0	1	1	0	1	1	0	1	1	0	3.1	2.2	0	1	1
478	C9JEJ2;P49585;C9J050;H7C1T3;C9J2E1;H7BZN1;C9JPY0;Q9Y5K3-2;Q9Y5K3-4;Q9Y5K3-3;Q9Y5K3;C9JVS0;F8WAZ5;F2Z2B1	C9JEJ2;P49585;C9J050;H7C1T3;C9J2E1	Choline-phosphate cytidylyltransferase A	PCYT1A	tr|C9JEJ2|C9JEJ2_HUMAN Choline-phosphate cytidylyltransferase A OS=Homo sapiens GN=PCYT1A PE=1 SV=1;sp|P49585|PCY1A_HUMAN Choline-phosphate cytidylyltransferase A OS=Homo sapiens GN=PCYT1A PE=1 SV=2;tr|C9J050|C9J050_HUMAN Choline-phosphate cytidylyltransfe	843490000	228020000	804770000	64699000	29086000	7862600	27751000	640150000	658520000	777070000	14	14	14	49.5	49.5	49.5	43.263	0	43.588	1876300000	31	14	9	8	9	9	8	9	9	8	9	32.4	33.4	34.7	10	8	13
479	C9JFR7;P99999;CON__P62894	C9JFR7;P99999	Cytochrome c	CYCS	tr|C9JFR7|C9JFR7_HUMAN Cytochrome c (Fragment) OS=Homo sapiens GN=CYCS PE=1 SV=1;sp|P99999|CYC_HUMAN Cytochrome c OS=Homo sapiens GN=CYCS PE=1 SV=2	9580800000	4217400000	10441000000	3029900000	1197600000	527180000	1305100000	9316400000	8148800000	10664000000	8	8	8	64.4	64.4	64.4	11.333	0	67.921	24239000000	108	3	8	8	8	8	8	8	8	8	8	64.4	64.4	64.4	31	39	38
480	C9JFR9;Q9UNU6	C9JFR9;Q9UNU6	7-alpha-hydroxycholest-4-en-3-one 12-alpha-hydroxylase	CYP8B1	tr|C9JFR9|C9JFR9_HUMAN 7-alpha-hydroxycholest-4-en-3-one 12-alpha-hydroxylase OS=Homo sapiens GN=CYP8B1 PE=3 SV=1;sp|Q9UNU6|CP8B1_HUMAN 7-alpha-hydroxycholest-4-en-3-one 12-alpha-hydroxylase OS=Homo sapiens GN=CYP8B1 PE=2 SV=2	53788000	0	47540000	3377600	1792900	0	1584700	44949000	0	34597000	2	2	2	5.8	5.8	5.8	57.253	0	15.238	101330000	4	2	2	0	2	2	0	2	2	0	2	5.8	0	5.8	2	0	2
481	C9JFV4;E7EV54;I3L445;I3L4P1;I3L1P4;I3L4M7	C9JFV4;E7EV54		PELP1	tr|C9JFV4|C9JFV4_HUMAN Proline-, glutamic acid- and leucine-rich protein 1 OS=Homo sapiens GN=PELP1 PE=1 SV=2;tr|E7EV54|E7EV54_HUMAN Proline-, glutamic acid- and leucine-rich protein 1 OS=Homo sapiens GN=PELP1 PE=1 SV=1	10466000000	3949700000	9510300000	520120000	227510000	85863000	206740000	8886900000	10080000000	8637000000	34	34	2	46.5	46.5	0.8	124.94	0	323.31	23926000000	235	6	29	27	32	29	27	32	0	0	2	42.1	36.8	44.2	72	76	87
482	C9JFW8;Q9UQQ1-3;Q9UQQ1;Q9UQQ1-4;C9JX16;Q9UQQ1-2;Q9UQQ1-8;Q9UQQ1-7;Q9UQQ1-5;Q9UQQ1-6;E9PRC7;E9PII9;E9PLR8;E9PKW7;E9PKG8;H0YDS5;E9PKR0;E9PIU1;E9PJQ1;H0YEI8	C9JFW8;Q9UQQ1-3;Q9UQQ1;Q9UQQ1-4;C9JX16;Q9UQQ1-2;Q9UQQ1-8;Q9UQQ1-7;Q9UQQ1-5;Q9UQQ1-6	N-acetylated-alpha-linked acidic dipeptidase-like protein	NAALADL1	tr|C9JFW8|C9JFW8_HUMAN N-acetylated-alpha-linked acidic dipeptidase-like protein OS=Homo sapiens GN=NAALADL1 PE=4 SV=1;sp|Q9UQQ1-3|NALDL_HUMAN Isoform 3 of N-acetylated-alpha-linked acidic dipeptidase-like protein OS=Homo sapiens GN=NAALADL1;sp|Q9UQQ1|NALD	797610000	186390000	429300000	38197000	21557000	5037500	11603000	541360000	578670000	453670000	16	16	16	36.7	36.7	36.7	76.902	0	34.429	1413300000	33	20	14	7	8	14	7	8	14	7	8	31.2	16.3	15.3	14	8	11
483	C9JHL4;Q9H3P2;C9JEM7;H0Y3X6;H7C0W2;H7C2C7;F8W954;F8WF98;H7C2M8;H7C3C2	C9JHL4;Q9H3P2;C9JEM7;H0Y3X6;H7C0W2;H7C2C7	Negative elongation factor A	NELFA	tr|C9JHL4|C9JHL4_HUMAN Negative elongation factor A (Fragment) OS=Homo sapiens GN=NELFA PE=1 SV=1;sp|Q9H3P2|NELFA_HUMAN Negative elongation factor A OS=Homo sapiens GN=NELFA PE=1 SV=3;tr|C9JEM7|C9JEM7_HUMAN Negative elongation factor A (Fragment) OS=Homo s	163880000	5842800	50101000	13739000	10242000	365180	3131300	112110000	26380000	56539000	6	6	6	33.3	33.3	33.3	32.401	0	41.011	219820000	11	10	5	2	4	5	2	4	5	2	4	28.6	13.6	23.5	5	2	4
484	C9JIF9;P13798;H7C393;H7C1U0;C9JLK2;F8WEH5	C9JIF9;P13798;H7C393	Acylamino-acid-releasing enzyme	APEH	tr|C9JIF9|C9JIF9_HUMAN Acylamino-acid-releasing enzyme OS=Homo sapiens GN=APEH PE=1 SV=1;sp|P13798|ACPH_HUMAN Acylamino-acid-releasing enzyme OS=Homo sapiens GN=APEH PE=1 SV=4;tr|H7C393|H7C393_HUMAN Acylamino-acid-releasing enzyme (Fragment) OS=Homo sapien	591560000	197170000	348070000	32480000	16902000	5633300	9945000	410930000	473270000	314050000	13	13	13	28.4	28.4	28.4	81.673	0	52.38	1136800000	25	6	9	8	6	9	8	6	9	8	6	21.8	14.4	15.7	11	8	6
485	H7C2A6;C9JIK8;Q9Y4P1-3;Q9Y4P1-4;Q9Y4P1-6;Q9Y4P1;Q9Y4P1-2;C9J3C0	H7C2A6;C9JIK8;Q9Y4P1-3;Q9Y4P1-4;Q9Y4P1-6;Q9Y4P1;Q9Y4P1-2;C9J3C0	Cysteine protease ATG4B	ATG4B	tr|H7C2A6|H7C2A6_HUMAN Cysteine protease ATG4B (Fragment) OS=Homo sapiens GN=ATG4B PE=1 SV=1;tr|C9JIK8|C9JIK8_HUMAN Cysteine protease ATG4B (Fragment) OS=Homo sapiens GN=ATG4B PE=1 SV=1;sp|Q9Y4P1-3|ATG4B_HUMAN Isoform 3 of Cysteine protease ATG4B OS=Homo s	75869000	0	13480000	9927700	8429900	0	1497800	44294000	0	36594000	2	2	2	16.6	16.6	16.6	21.203	0	6.1201	89349000	4	8	2	1	1	2	1	1	2	1	1	16.6	8.8	8.8	2	1	1
486	C9JIZ1;C9J5E5;C9JZI8;C9JHS7;C9JHZ8;C9JES8;C9JT62;C9JK79;C9JBS3;C9JEJ8;A0A088AWM1;C9JHN6	C9JIZ1;C9J5E5;C9JZI8;C9JHS7;C9JHZ8;C9JES8		HDLBP	tr|C9JIZ1|C9JIZ1_HUMAN Vigilin (Fragment) OS=Homo sapiens GN=HDLBP PE=1 SV=2;tr|C9J5E5|C9J5E5_HUMAN Vigilin (Fragment) OS=Homo sapiens GN=HDLBP PE=1 SV=2;tr|C9JZI8|C9JZI8_HUMAN Vigilin (Fragment) OS=Homo sapiens GN=HDLBP PE=1 SV=2;tr|C9JHS7|C9JHS7_HUMAN Vi	207020000	114770000	218230000	36001000	13801000	7651200	14548000	144040000	364510000	231960000	11	1	1	58.5	7.6	7.6	24.708	0	11.94	540010000	6	12	10	8	7	1	1	1	1	1	1	57.6	48.7	46	2	2	2
487	C9JJ19;P82930;A0A087WUZ8	C9JJ19;P82930;A0A087WUZ8	28S ribosomal protein S34, mitochondrial	MRPS34	tr|C9JJ19|C9JJ19_HUMAN 28S ribosomal protein S34, mitochondrial OS=Homo sapiens GN=MRPS34 PE=1 SV=2;sp|P82930|RT34_HUMAN 28S ribosomal protein S34, mitochondrial OS=Homo sapiens GN=MRPS34 PE=1 SV=2;tr|A0A087WUZ8|A0A087WUZ8_HUMAN 28S ribosomal protein S34,	4447300000	1355100000	3277300000	605310000	296490000	90340000	218490000	3011100000	3288900000	2687900000	13	13	13	60.4	60.4	60.4	26.332	0	114.24	9079700000	101	3	11	10	9	11	10	9	11	10	9	54.7	45.8	50.7	39	30	32
488	C9JJX6;E9PDC3;O00192-2;O00192	C9JJX6;E9PDC3;O00192-2;O00192	Armadillo repeat protein deleted in velo-cardio-facial syndrome	ARVCF	tr|C9JJX6|C9JJX6_HUMAN Armadillo repeat protein deleted in velo-cardio-facial syndrome OS=Homo sapiens GN=ARVCF PE=1 SV=1;tr|E9PDC3|E9PDC3_HUMAN Armadillo repeat protein deleted in velo-cardio-facial syndrome OS=Homo sapiens GN=ARVCF PE=1 SV=1;sp|O00192-2|	242000000	63228000	265070000	10561000	4481500	1170900	4908800	197520000	138800000	286140000	12	12	12	18.7	18.7	18.7	96.827	0	66.216	570300000	20	4	7	3	9	7	3	9	7	3	9	11.2	3.9	15	8	2	10
489	C9JPX5;C9JKL2;O95772;C9JJ39;C9J3F5	C9JPX5;C9JKL2;O95772	MLN64 N-terminal domain homolog	STARD3NL	tr|C9JPX5|C9JPX5_HUMAN MLN64 N-terminal domain homolog (Fragment) OS=Homo sapiens GN=STARD3NL PE=1 SV=1;tr|C9JKL2|C9JKL2_HUMAN MLN64 N-terminal domain homolog OS=Homo sapiens GN=STARD3NL PE=1 SV=1;sp|O95772|MENTO_HUMAN MLN64 N-terminal domain homolog OS=Ho	20385000	141800000	0	14744000	1853100	12891000	0	0	330650000	0	3	3	1	21.4	21.4	11.2	23.505	0	7.0741	162190000	3	5	1	2	0	1	2	0	1	0	0	11.2	10.2	0	1	2	0
490	C9JL85;P58546	C9JL85;P58546	Myotrophin	MTPN	tr|C9JL85|C9JL85_HUMAN Myotrophin OS=Homo sapiens GN=MTPN PE=1 SV=1;sp|P58546|MTPN_HUMAN Myotrophin OS=Homo sapiens GN=MTPN PE=1 SV=2	100480000	52490000	56970000	69979000	33493000	17497000	18990000	90195000	116830000	89645000	2	2	2	51.9	51.9	51.9	5.7044	0	6.9024	209940000	5	2	2	1	1	2	1	1	2	1	1	51.9	32.7	32.7	2	2	1
491	C9JLB7;Q96HP4;U3KQU8;K7EL64;J3KQ80;A0A087X1J3;A0A087X0T7;A0A087WVD5;K7ENL6;A0A087WXJ1;A6NEY3;A6NI86;D6RB28;H0YKK7;A6NEF3;Q8TES7-2;Q8TES7-5;Q8TES7;Q8TES7-6	C9JLB7;Q96HP4;U3KQU8	Oxidoreductase NAD-binding domain-containing protein 1	OXNAD1	tr|C9JLB7|C9JLB7_HUMAN Oxidoreductase NAD-binding domain-containing protein 1 OS=Homo sapiens GN=OXNAD1 PE=1 SV=2;sp|Q96HP4|OXND1_HUMAN Oxidoreductase NAD-binding domain-containing protein 1 OS=Homo sapiens GN=OXNAD1 PE=1 SV=1;tr|U3KQU8|U3KQU8_HUMAN Oxidor	216370000	43220000	176770000	15584000	7727400	1543600	6313200	160640000	138500000	181430000	7	6	6	24.5	22.7	22.7	36.835	0	10.122	436360000	8	19	5	3	4	5	2	4	5	2	4	19.4	9.1	15.5	4	1	3
492	C9JLC0;P0C2W1	C9JLC0;P0C2W1	F-box/SPRY domain-containing protein 1	FBXO45	tr|C9JLC0|C9JLC0_HUMAN F-box/SPRY domain-containing protein 1 OS=Homo sapiens GN=FBXO45 PE=1 SV=1;sp|P0C2W1|FBSP1_HUMAN F-box/SPRY domain-containing protein 1 OS=Homo sapiens GN=FBXO45 PE=1 SV=1	0	0	8438900	1687800	0	0	1687800	0	0	9260500	1	1	1	9.3	9.3	9.3	11.873	0.0044793	1.8587	8438900	1	2	0	0	1	0	0	1	0	0	1	0	0	9.3	0	0	1
493	C9JLU1;P52434;P52434-4;P52434-3;P52434-2;P52434-5	C9JLU1;P52434;P52434-4;P52434-3;P52434-2	DNA-directed RNA polymerases I, II, and III subunit RPABC3	POLR2H	tr|C9JLU1|C9JLU1_HUMAN DNA-directed RNA polymerases I, II, and III subunit RPABC3 (Fragment) OS=Homo sapiens GN=POLR2H PE=1 SV=3;sp|P52434|RPAB3_HUMAN DNA-directed RNA polymerases I, II, and III subunit RPABC3 OS=Homo sapiens GN=POLR2H PE=1 SV=4;sp|P52434-	173040000	308310000	101580000	58293000	17304000	30831000	10158000	121420000	914910000	79951000	8	8	8	67.8	67.8	67.8	16.996	0	14.482	582930000	14	6	4	5	2	4	5	2	4	5	2	24.2	51.7	15.4	4	6	4
494	C9JLZ4;Q53TQ3;Q53TQ3-2	C9JLZ4;Q53TQ3;Q53TQ3-2	INO80 complex subunit D	INO80D	tr|C9JLZ4|C9JLZ4_HUMAN INO80 complex subunit D (Fragment) OS=Homo sapiens GN=INO80D PE=4 SV=1;sp|Q53TQ3|IN80D_HUMAN INO80 complex subunit D OS=Homo sapiens GN=INO80D PE=1 SV=2;sp|Q53TQ3-2|IN80D_HUMAN Isoform 2 of INO80 complex subunit D OS=Homo sapiens GN=	21091000	0	0	1004300	1004300	0	0	17462000	0	0	1	1	1	5.7	5.7	5.7	49.658	0.0022668	2.067	21091000	1	3	1	0	0	1	0	0	1	0	0	5.7	0	0	1	0	0
495	C9JME2;Q9Y4F1;Q9Y4F1-2;M0QYB0;M0QXT1;M0R262;H0Y783;Q9Y4F1-3	C9JME2;Q9Y4F1;Q9Y4F1-2	FERM, RhoGEF and pleckstrin domain-containing protein 1	FARP1	tr|C9JME2|C9JME2_HUMAN FERM, RhoGEF and pleckstrin domain-containing protein 1 OS=Homo sapiens GN=FARP1 PE=1 SV=2;sp|Q9Y4F1|FARP1_HUMAN FERM, RhoGEF and pleckstrin domain-containing protein 1 OS=Homo sapiens GN=FARP1 PE=1 SV=1;sp|Q9Y4F1-2|FARP1_HUMAN Isofo	13588000000	4598600000	12360000000	455920000	202800000	68636000	184480000	10374000000	11256000000	12315000000	49	49	49	65.4	65.4	65.4	122.09	0	323.31	30546000000	247	8	43	30	39	43	30	39	43	30	39	58.8	38.8	53.9	84	66	97
496	C9JNE2;Q9Y530;C9JXC3;C9J5P1;H7C5Q1;C9JA90;C9IZY1	C9JNE2;Q9Y530;C9JXC3;C9J5P1	O-acetyl-ADP-ribose deacetylase 1	OARD1	tr|C9JNE2|C9JNE2_HUMAN O-acetyl-ADP-ribose deacetylase 1 (Fragment) OS=Homo sapiens GN=OARD1 PE=1 SV=1;sp|Q9Y530|OARD1_HUMAN O-acetyl-ADP-ribose deacetylase 1 OS=Homo sapiens GN=OARD1 PE=1 SV=2;tr|C9JXC3|C9JXC3_HUMAN O-acetyl-ADP-ribose deacetylase 1 OS=Ho	67861000	0	67444000	12301000	6169200	0	6131300	0	0	80525000	4	4	4	34.4	34.4	34.4	14.67	0	9.6733	135310000	4	7	4	0	1	4	0	1	4	0	1	34.4	0	9.2	3	0	1
497	C9JNL8;Q3MIT2;A8MUL8	C9JNL8;Q3MIT2;A8MUL8	Putative tRNA pseudouridine synthase Pus10	PUS10	tr|C9JNL8|C9JNL8_HUMAN Putative tRNA pseudouridine synthase Pus10 (Fragment) OS=Homo sapiens GN=PUS10 PE=1 SV=1;sp|Q3MIT2|PUS10_HUMAN Putative tRNA pseudouridine synthase Pus10 OS=Homo sapiens GN=PUS10 PE=1 SV=1;tr|A8MUL8|A8MUL8_HUMAN Putative tRNA pseudou	34277000	0	0	3808500	3808500	0	0	24610000	0	0	2	2	2	19.2	19.2	19.2	13.609	0.0003399	2.8302	34277000	2	3	2	0	0	2	0	0	2	0	0	19.2	0	0	2	0	0
498	C9JXB8;C9JNW5;P83731	C9JXB8;C9JNW5;P83731	60S ribosomal protein L24	RPL24	tr|C9JXB8|C9JXB8_HUMAN 60S ribosomal protein L24 OS=Homo sapiens GN=RPL24 PE=1 SV=1;tr|C9JNW5|C9JNW5_HUMAN 60S ribosomal protein L24 OS=Homo sapiens GN=RPL24 PE=1 SV=1;sp|P83731|RL24_HUMAN 60S ribosomal protein L24 OS=Homo sapiens GN=RPL24 PE=1 SV=1	9693000000	4955600000	8940000000	3369800000	1384700000	707950000	1277100000	7459300000	10057000000	10116000000	7	7	7	41.3	41.3	41.3	14.369	0	20.513	23589000000	75	3	7	5	6	7	5	6	7	5	6	41.3	39.7	41.3	24	31	20
499	C9JRY4;C9JNZ0;Q96IW7;C9JDJ8;F8WAU7;C9JR77;C9J463;C9JZ27	C9JRY4;C9JNZ0;Q96IW7;C9JDJ8	Vesicle-trafficking protein SEC22a	SEC22A	tr|C9JRY4|C9JRY4_HUMAN Vesicle-trafficking protein SEC22a (Fragment) OS=Homo sapiens GN=SEC22A PE=1 SV=1;tr|C9JNZ0|C9JNZ0_HUMAN Vesicle-trafficking protein SEC22a (Fragment) OS=Homo sapiens GN=SEC22A PE=1 SV=4;sp|Q96IW7|SC22A_HUMAN Vesicle-trafficking prot	173470000	39793000	250030000	42117000	15770000	3617500	22730000	203570000	186890000	177120000	3	3	3	18.3	18.3	18.3	24.506	0	40.881	463290000	5	8	2	1	3	2	1	3	2	1	3	13.3	8.7	18.3	2	1	2
500	C9JP00;Q9NR56;Q86VM6;O95205;H7C4T5;Q9NR56-3;Q9NR56-4;Q9NR56-7;Q9NR56-6;Q5VZF2-3;Q5VZF2-2;Q9NR56-2;Q5VZF2;Q9NR56-5;C9JCX1;H7C4Y1	C9JP00;Q9NR56;Q86VM6;O95205;H7C4T5;Q9NR56-3;Q9NR56-4;Q9NR56-7;Q9NR56-6;Q5VZF2-3;Q5VZF2-2;Q9NR56-2;Q5VZF2;Q9NR56-5	Muscleblind-like protein 1;Muscleblind-like protein 2	MBNL1;MBLL;MBNL2	tr|C9JP00|C9JP00_HUMAN Muscleblind-like protein 1 OS=Homo sapiens GN=MBNL1 PE=1 SV=1;sp|Q9NR56|MBNL1_HUMAN Muscleblind-like protein 1 OS=Homo sapiens GN=MBNL1 PE=1 SV=2;tr|Q86VM6|Q86VM6_HUMAN MBNL1 protein OS=Homo sapiens GN=MBNL1 PE=1 SV=1;tr|O95205|O9520	544490000	22783000	238310000	57542000	38892000	1627400	17022000	344240000	0	242040000	4	4	4	19.5	19.5	19.5	37.898	0	13.677	805580000	12	16	3	1	2	3	1	2	3	1	2	11.8	7.8	5.7	6	1	5
501	C9JPC9;Q9H9J4-2;Q9H9J4;E7EWZ4	C9JPC9;Q9H9J4-2;Q9H9J4	Ubiquitin carboxyl-terminal hydrolase 42	USP42	tr|C9JPC9|C9JPC9_HUMAN Ubiquitin carboxyl-terminal hydrolase 42 (Fragment) OS=Homo sapiens GN=USP42 PE=1 SV=4;sp|Q9H9J4-2|UBP42_HUMAN Isoform 2 of Ubiquitin carboxyl-terminal hydrolase 42 OS=Homo sapiens GN=USP42;sp|Q9H9J4|UBP42_HUMAN Ubiquitin carboxyl-te	27120000	0	23185000	882530	475780	0	406750	0	0	20361000	3	3	3	4.1	4.1	4.1	114.53	0.00017525	3.3429	50304000	3	4	1	0	2	1	0	2	1	0	2	1.2	0	2.9	1	0	2
502	C9JPL0;Q9UK58;Q9UK58-5;Q9UK58-4	C9JPL0;Q9UK58;Q9UK58-5;Q9UK58-4	Cyclin-L1	CCNL1	tr|C9JPL0|C9JPL0_HUMAN Cyclin-L1 OS=Homo sapiens GN=CCNL1 PE=1 SV=1;sp|Q9UK58|CCNL1_HUMAN Cyclin-L1 OS=Homo sapiens GN=CCNL1 PE=1 SV=1;sp|Q9UK58-5|CCNL1_HUMAN Isoform 3 of Cyclin-L1 OS=Homo sapiens GN=CCNL1;sp|Q9UK58-4|CCNL1_HUMAN Isoform 2 of Cyclin-L1 OS	0	2384000	8400000	513520	0	113520	400000	0	6040400	0	2	2	2	7.2	7.2	7.2	47.788	0.00033784	2.7628	10784000	1	4	0	1	1	0	1	1	0	1	1	0	3.5	3.7	0	0	1
503	C9JQA1;O60828-7;O60828-6;O60828-4;O60828-3;O60828-2;O60828;H7C053;O60828-10;O60828-9;O60828-8;O60828-5	C9JQA1;O60828-7;O60828-6;O60828-4;O60828-3;O60828-2;O60828;H7C053;O60828-10;O60828-9;O60828-8;O60828-5	Polyglutamine-binding protein 1	PQBP1	tr|C9JQA1|C9JQA1_HUMAN Polyglutamine-binding protein 1 (Fragment) OS=Homo sapiens GN=PQBP1 PE=1 SV=1;sp|O60828-7|PQBP1_HUMAN Isoform 7 of Polyglutamine-binding protein 1 OS=Homo sapiens GN=PQBP1;sp|O60828-6|PQBP1_HUMAN Isoform 6 of Polyglutamine-binding pr	174830000	33158000	98747000	51123000	29139000	5526400	16458000	104710000	173470000	91672000	2	2	2	19.7	19.7	19.7	24.935	0.00018195	4.1469	306740000	5	12	2	1	2	2	1	2	2	1	2	19.7	4.2	19.7	2	1	2
504	C9JQB1;O75414;C9J9V6;C9J1J2;O75414-2	C9JQB1;O75414;C9J9V6	Nucleoside diphosphate kinase;Nucleoside diphosphate kinase 6	NME6	tr|C9JQB1|C9JQB1_HUMAN Nucleoside diphosphate kinase OS=Homo sapiens GN=NME6 PE=1 SV=1;sp|O75414|NDK6_HUMAN Nucleoside diphosphate kinase 6 OS=Homo sapiens GN=NME6 PE=1 SV=3;tr|C9J9V6|C9J9V6_HUMAN Nucleoside diphosphate kinase (Fragment) OS=Homo sapiens GN	144410000	145870000	206450000	49673000	14441000	14587000	20645000	257350000	276080000	176050000	6	6	6	51.8	51.8	51.8	16.188	0	19.972	496730000	11	5	3	3	3	3	3	3	3	3	3	27	24.8	19.1	3	5	3
505	C9JQV3;Q8N1F8;Q8N1F8-2;H7C2J7;M0QYE5;H7C236	C9JQV3;Q8N1F8;Q8N1F8-2	Serine/threonine-protein kinase 11-interacting protein	STK11IP	tr|C9JQV3|C9JQV3_HUMAN Serine/threonine-protein kinase 11-interacting protein OS=Homo sapiens GN=STK11IP PE=1 SV=1;sp|Q8N1F8|S11IP_HUMAN Serine/threonine-protein kinase 11-interacting protein OS=Homo sapiens GN=STK11IP PE=1 SV=3;sp|Q8N1F8-2|S11IP_HUMAN Iso	381510000	0	83307000	8300300	6812700	0	1487600	336390000	0	64581000	12	12	12	14.2	14.2	14.2	120.26	0	24.896	464820000	11	6	9	1	4	9	1	4	9	1	4	10.7	1.4	4.3	7	1	3
506	C9JRD2;C9JXB9;P25686-2;P25686;C9J1G2;E7ETU0;C9JX00	C9JRD2;C9JXB9;P25686-2;P25686;C9J1G2;E7ETU0;C9JX00	DnaJ homolog subfamily B member 2	DNAJB2	tr|C9JRD2|C9JRD2_HUMAN DnaJ homolog subfamily B member 2 (Fragment) OS=Homo sapiens GN=DNAJB2 PE=4 SV=1;tr|C9JXB9|C9JXB9_HUMAN DnaJ homolog subfamily B member 2 (Fragment) OS=Homo sapiens GN=DNAJB2 PE=4 SV=1;sp|P25686-2|DNJB2_HUMAN Isoform 2 of DnaJ homolo	100060000	19305000	60304000	13821000	7697100	1485000	4638800	57316000	72003000	36735000	4	3	3	21.1	16.7	16.7	25.411	0	9.281	179670000	5	7	3	1	3	3	1	2	3	1	2	16.7	5.3	16.2	3	0	2
507	C9JRL4	C9JRL4		MDH1	tr|C9JRL4|C9JRL4_HUMAN Malate dehydrogenase, cytoplasmic (Fragment) OS=Homo sapiens GN=MDH1 PE=1 SV=3	53710000	0	13074000	8348000	6713700	0	1634200	33489000	0	15475000	5	1	1	59.2	16.7	16.7	13.044	0	8.3386	66784000	5	1	5	3	5	1	0	1	1	0	1	59.2	31.7	59.2	3	0	2
508	C9JRZ6;Q9NX63;F8WAR4;F8WD73	C9JRZ6;Q9NX63;F8WAR4	MICOS complex subunit MIC19	CHCHD3	tr|C9JRZ6|C9JRZ6_HUMAN MICOS complex subunit MIC19 OS=Homo sapiens GN=CHCHD3 PE=1 SV=1;sp|Q9NX63|MIC19_HUMAN MICOS complex subunit MIC19 OS=Homo sapiens GN=CHCHD3 PE=1 SV=1;tr|F8WAR4|F8WAR4_HUMAN MICOS complex subunit MIC19 OS=Homo sapiens GN=CHCHD3 PE=1 S	8020200000	4374000000	5601800000	947160000	422120000	230210000	294830000	7321700000	9279400000	7962600000	15	15	15	44.8	44.8	44.8	26.694	0	201.93	17996000000	93	4	13	12	10	13	12	10	13	12	10	40.9	39.7	34.5	30	38	25
509	C9JTE9;Q9UHQ4;Q9UHQ4-2;C9IYK6;H7C5E2;C9JGJ9;F8WB99;B7Z2L0;H0Y7N8;C9JP06;F8WDG1	C9JTE9;Q9UHQ4;Q9UHQ4-2;C9IYK6;H7C5E2;C9JGJ9;F8WB99	B-cell receptor-associated protein 29	BCAP29	tr|C9JTE9|C9JTE9_HUMAN B-cell receptor-associated protein 29 (Fragment) OS=Homo sapiens GN=BCAP29 PE=1 SV=1;sp|Q9UHQ4|BAP29_HUMAN B-cell receptor-associated protein 29 OS=Homo sapiens GN=BCAP29 PE=1 SV=2;sp|Q9UHQ4-2|BAP29_HUMAN Isoform 2 of B-cell receptor	88808000	91061000	85129000	17667000	5920500	6070700	5675200	123600000	170870000	92610000	7	7	7	24.8	24.8	24.8	26.953	0	6.7564	265000000	11	11	3	4	3	3	4	3	3	4	3	15.2	21.3	13.9	4	4	3
510	C9JU14	C9JU14		RAB6B	tr|C9JU14|C9JU14_HUMAN Ras-related protein Rab-6B (Fragment) OS=Homo sapiens GN=RAB6B PE=4 SV=3	33439000	0	0	4776900	4776900	0	0	26233000	0	0	5	1	1	54.2	22.9	22.9	9.6668	1	-2	33439000	1	1	4	4	3	1	0	0	1	0	0	44.6	44.6	37.3	1	0	0
511	C9JUJ0;Q9UFW8	C9JUJ0;Q9UFW8	CGG triplet repeat-binding protein 1	CGGBP1	tr|C9JUJ0|C9JUJ0_HUMAN CGG triplet repeat-binding protein 1 (Fragment) OS=Homo sapiens GN=CGGBP1 PE=1 SV=1;sp|Q9UFW8|CGBP1_HUMAN CGG triplet repeat-binding protein 1 OS=Homo sapiens GN=CGGBP1 PE=1 SV=2	41204000	0	0	5150500	5150500	0	0	29265000	0	0	1	1	1	13.2	13.2	13.2	11.939	0.00050192	2.613	41204000	1	2	1	0	0	1	0	0	1	0	0	13.2	0	0	1	0	0
512	C9JUK7;P16150	C9JUK7;P16150	Leukosialin	SPN	tr|C9JUK7|C9JUK7_HUMAN Leukosialin (Fragment) OS=Homo sapiens GN=SPN PE=1 SV=1;sp|P16150|LEUK_HUMAN Leukosialin OS=Homo sapiens GN=SPN PE=1 SV=1	52404000	0	50579000	10298000	5240400	0	5057900	50599000	0	29683000	1	1	1	2.3	2.3	2.3	35.962	0.0016247	2.1556	102980000	2	2	1	0	1	1	0	1	1	0	1	2.3	0	2.3	1	0	1
513	C9JW63;Q9Y2D2-3;Q9Y2D2;Q9Y2D2-2;E9PPQ9	C9JW63;Q9Y2D2-3;Q9Y2D2;Q9Y2D2-2;E9PPQ9	UDP-N-acetylglucosamine transporter	SLC35A3	tr|C9JW63|C9JW63_HUMAN UDP-N-acetylglucosamine transporter (Fragment) OS=Homo sapiens GN=SLC35A3 PE=4 SV=1;sp|Q9Y2D2-3|S35A3_HUMAN Isoform 3 of UDP-N-acetylglucosamine transporter OS=Homo sapiens GN=SLC35A3;sp|Q9Y2D2|S35A3_HUMAN UDP-N-acetylglucosamine tra	706470000	35298000	228400000	88197000	64225000	3208900	20764000	411040000	155160000	163600000	2	2	2	12.9	12.9	12.9	24.961	0	5.3673	970170000	10	5	2	1	1	2	1	1	2	1	1	12.9	6.7	6.7	6	1	3
514	C9JW74;Q5EB52-2;Q5EB52;C9JWU9;C9JSW2;Q5EB52-3;C9JRA9;C9JCM6;C9JG66;C9JUD2	C9JW74;Q5EB52-2;Q5EB52;C9JWU9;C9JSW2;Q5EB52-3;C9JRA9;C9JCM6	Mesoderm-specific transcript homolog protein	MEST	tr|C9JW74|C9JW74_HUMAN Mesoderm-specific transcript homolog protein OS=Homo sapiens GN=MEST PE=4 SV=1;sp|Q5EB52-2|MEST_HUMAN Isoform 2 of Mesoderm-specific transcript homolog protein OS=Homo sapiens GN=MEST;sp|Q5EB52|MEST_HUMAN Mesoderm-specific transcript	250360000	33255000	5414700	20645000	17883000	2375400	386770	244750000	31520000	6888900	5	5	3	21.3	21.3	11.5	34.348	0	47.256	289030000	9	10	5	1	1	5	1	1	3	1	0	21.3	6.4	6.1	7	1	1
515	C9JWC4;Q8NCD3-3;Q8NCD3-2;Q8NCD3;H7C3V8	C9JWC4;Q8NCD3-3;Q8NCD3-2;Q8NCD3	Holliday junction recognition protein	HJURP	tr|C9JWC4|C9JWC4_HUMAN Holliday junction recognition protein (Fragment) OS=Homo sapiens GN=HJURP PE=1 SV=1;sp|Q8NCD3-3|HJURP_HUMAN Isoform 3 of Holliday junction recognition protein OS=Homo sapiens GN=HJURP;sp|Q8NCD3-2|HJURP_HUMAN Isoform 2 of Holliday jun	30980000	5927300	44192000	2191900	837310	160200	1194400	29256000	0	35656000	4	4	4	13	13	13	64.277	0	5.591	81099000	5	5	2	1	2	2	1	2	2	1	2	4.7	3.5	6.8	2	1	2
516	C9JXC6	C9JXC6		SEC61A1	tr|C9JXC6|C9JXC6_HUMAN Protein transport protein Sec61 subunit alpha isoform 1 (Fragment) OS=Homo sapiens GN=SEC61A1 PE=3 SV=1	139870000	55299000	308440000	100720000	27974000	11060000	61687000	176760000	129540000	233840000	4	1	1	35.6	11.9	11.9	10.817	0	8.9369	503600000	2	1	4	3	3	1	1	1	1	1	1	35.6	27.7	27.7	0	1	1
517	C9JXF9;P08833;C9J6H2	C9JXF9;P08833;C9J6H2	Insulin-like growth factor-binding protein 1	IGFBP1	tr|C9JXF9|C9JXF9_HUMAN Insulin-like growth factor-binding protein 1 OS=Homo sapiens GN=IGFBP1 PE=4 SV=1;sp|P08833|IBP1_HUMAN Insulin-like growth factor-binding protein 1 OS=Homo sapiens GN=IGFBP1 PE=1 SV=1;tr|C9J6H2|C9J6H2_HUMAN Insulin-like growth factor-	6918700000	2418800000	5944900000	1175600000	532210000	186060000	457300000	5919300000	6022400000	4561900000	9	9	9	37.7	37.7	37.7	27.671	0	45.29	15282000000	54	3	9	8	8	9	8	8	9	8	8	37.7	35	37.4	15	22	17
518	C9JY04;Q9BU79	C9JY04;Q9BU79	Transmembrane protein 243	TMEM243	tr|C9JY04|C9JY04_HUMAN Transmembrane protein 243 OS=Homo sapiens GN=TMEM243 PE=1 SV=1;sp|Q9BU79|TM243_HUMAN Transmembrane protein 243 OS=Homo sapiens GN=TMEM243 PE=1 SV=1	66876000	0	94945000	26970000	11146000	0	15824000	48120000	0	78135000	1	1	1	16	16	16	12.918	0	9.5482	161820000	4	2	1	0	1	1	0	1	1	0	1	16	0	16	2	0	2
519	M0QZQ3;C9JY79;Q9H254-2;Q9H254-4;Q9H254;M0R1V6	M0QZQ3;C9JY79;Q9H254-2;Q9H254-4;Q9H254	Spectrin beta chain, non-erythrocytic 4	SPTBN4	tr|M0QZQ3|M0QZQ3_HUMAN Spectrin beta chain, non-erythrocytic 4 OS=Homo sapiens GN=SPTBN4 PE=4 SV=1;tr|C9JY79|C9JY79_HUMAN Non-erythrocytic beta-spectrin 4 OS=Homo sapiens GN=SPTBN4 PE=2 SV=2;sp|Q9H254-2|SPTN4_HUMAN Isoform 2 of Spectrin beta chain, non-ery	21972000	0	17487000	298930	166460	0	132470	14378000	0	16327000	5	1	1	2.1	0.4	0.4	225.49	1	-2	39459000	2	6	4	4	5	1	0	1	1	0	1	1.8	1.7	2.1	1	0	1
520	C9JYJ6;Q4L180-3;Q4L180-7;Q4L180-2;Q4L180;Q4L180-6;Q4L180-5	C9JYJ6;Q4L180-3;Q4L180-7;Q4L180-2;Q4L180;Q4L180-6;Q4L180-5	Filamin A-interacting protein 1-like	FILIP1L	tr|C9JYJ6|C9JYJ6_HUMAN Filamin A-interacting protein 1-like (Fragment) OS=Homo sapiens GN=FILIP1L PE=4 SV=1;sp|Q4L180-3|FIL1L_HUMAN Isoform 3 of Filamin A-interacting protein 1-like OS=Homo sapiens GN=FILIP1L;sp|Q4L180-7|FIL1L_HUMAN Isoform 7 of Filamin A-	77286000	6568200	16777000	1649700	1267000	107680	275040	64075000	0	0	7	7	7	11.8	11.8	11.8	96.302	0	7.7647	100630000	6	7	4	1	2	4	1	2	4	1	2	5.9	1.9	4.1	3	1	2
521	C9JYM0;O75817	C9JYM0;O75817	Ribonuclease P protein subunit p20	POP7	tr|C9JYM0|C9JYM0_HUMAN Ribonuclease P protein subunit p20 (Fragment) OS=Homo sapiens GN=POP7 PE=1 SV=1;sp|O75817|POP7_HUMAN Ribonuclease P protein subunit p20 OS=Homo sapiens GN=POP7 PE=1 SV=2	36515000	24830000	58755000	24020000	7303000	4966100	11751000	43890000	44582000	79493000	1	1	1	10.9	10.9	10.9	15.324	0	4.6377	120100000	3	2	1	1	1	1	1	1	1	1	1	10.9	10.9	10.9	1	1	1
522	J3KS67;C9JYS5;Q96ET8-3;Q9NYZ1;E5RIS5;I3L376;E5RGC5;K7ENL4;J3QL63;J3QL47;Q96ET8-2	J3KS67;C9JYS5;Q96ET8-3;Q9NYZ1;E5RIS5;I3L376;E5RGC5;K7ENL4;J3QL63;J3QL47;Q96ET8-2	Golgi apparatus membrane protein TVP23 homolog;Golgi apparatus membrane protein TVP23 homolog C;Golgi apparatus membrane protein TVP23 homolog B	TVP23B;TVP23C	tr|J3KS67|J3KS67_HUMAN Golgi apparatus membrane protein TVP23 homolog OS=Homo sapiens GN=TVP23B PE=1 SV=1;tr|C9JYS5|C9JYS5_HUMAN Golgi apparatus membrane protein TVP23 homolog OS=Homo sapiens GN=TVP23C PE=1 SV=1;sp|Q96ET8-3|TV23C_HUMAN Isoform 3 of Golgi a	56616000	0	74676000	11936000	5146900	0	6788700	63906000	0	71103000	2	1	1	19.2	5.9	5.9	23.507	0	5.0121	131290000	3	11	2	0	2	1	0	1	1	0	1	19.2	0	19.2	1	0	2
523	F8WBF4;C9K0I4;F8WDH1;P56557	F8WBF4;C9K0I4;F8WDH1;P56557	Transmembrane protein 50B	TMEM50B	tr|F8WBF4|F8WBF4_HUMAN Transmembrane protein 50B OS=Homo sapiens GN=TMEM50B PE=1 SV=1;tr|C9K0I4|C9K0I4_HUMAN Transmembrane protein 50B (Fragment) OS=Homo sapiens GN=TMEM50B PE=1 SV=1;tr|F8WDH1|F8WDH1_HUMAN Transmembrane protein 50B OS=Homo sapiens GN=TMEM5	157590000	62735000	100630000	106980000	52530000	20912000	33543000	121280000	114210000	128030000	2	2	2	45.5	45.5	45.5	4.9386	0	4.5316	320950000	13	4	2	2	2	2	2	2	2	2	2	45.5	45.5	45.5	4	6	3
524	D3DPC4;Q53R41;Q53R41-2;E7EW60;C9JTP4;C9JMM4	D3DPC4;Q53R41;Q53R41-2	FAST kinase domain-containing protein 1	FLJ21901;FASTKD1	tr|D3DPC4|D3DPC4_HUMAN FAST kinase domain-containing protein 1 OS=Homo sapiens GN=FLJ21901 PE=1 SV=1;sp|Q53R41|FAKD1_HUMAN FAST kinase domain-containing protein 1 OS=Homo sapiens GN=FASTKD1 PE=1 SV=1;sp|Q53R41-2|FAKD1_HUMAN Isoform 2 of FAST kinase domain-	1297100000	313610000	1316800000	56299000	24944000	6031000	25323000	1090200000	1005900000	971760000	23	23	23	39.9	39.9	39.9	94.762	0	80.73	2927500000	55	6	18	7	17	18	7	17	18	7	17	33.4	13	30	24	8	23
525	D3DQV9;P78344;H0Y3P2;P78344-2;H0YCH5;H0YD77;H0YEC5;H0YE22;H0YCF8;H0YE44;H0YEN8;H0YDC0;H0YD99	D3DQV9;P78344;H0Y3P2;P78344-2	Eukaryotic translation initiation factor 4 gamma 2	EIF4G2	tr|D3DQV9|D3DQV9_HUMAN Eukaryotic translation initiation factor 4 gamma 2 (Fragment) OS=Homo sapiens GN=EIF4G2 PE=1 SV=1;sp|P78344|IF4G2_HUMAN Eukaryotic translation initiation factor 4 gamma 2 OS=Homo sapiens GN=EIF4G2 PE=1 SV=1;tr|H0Y3P2|H0Y3P2_HUMAN Euk	1530600000	275050000	1386100000	56996000	27333000	4911700	24752000	1116000000	1060100000	1125200000	29	29	19	36.7	36.7	24.7	102.33	0	87.824	3191800000	69	13	25	10	25	25	10	25	15	6	17	32	15.3	32	30	12	27
526	D3DSM6;P41440;P41440-2;H3BTQ3;P41440-3;E9PIL5;C9J8K6;C9JKP4;H0Y4T2	D3DSM6;P41440;P41440-2;H3BTQ3;P41440-3	Folate transporter 1	SLC19A1	tr|D3DSM6|D3DSM6_HUMAN Folate transporter 1 OS=Homo sapiens GN=SLC19A1 PE=1 SV=1;sp|P41440|S19A1_HUMAN Folate transporter 1 OS=Homo sapiens GN=SLC19A1 PE=1 SV=3;sp|P41440-2|S19A1_HUMAN Isoform 2 of Folate transporter 1 OS=Homo sapiens GN=SLC19A1;tr|H3BTQ3|	343750000	139490000	427960000	30373000	11458000	4649600	14265000	298220000	434070000	338930000	7	7	7	14.4	14.4	14.4	67.199	0	19.496	911200000	14	9	4	3	5	4	3	5	4	3	5	9.8	7.8	12.1	6	3	5
527	D3DTX6;Q96SB3	D3DTX6;Q96SB3	Neurabin-2	PPP1R9B	tr|D3DTX6|D3DTX6_HUMAN Neurabin-2 OS=Homo sapiens GN=PPP1R9B PE=1 SV=1;sp|Q96SB3|NEB2_HUMAN Neurabin-2 OS=Homo sapiens GN=PPP1R9B PE=1 SV=2	205220000	118970000	174330000	12783000	5262200	3050400	4470100	139950000	0	204160000	11	11	11	18.4	18.4	18.4	89.333	0	29.963	498530000	15	2	4	4	6	4	4	6	4	4	6	6.9	6.1	10.8	4	4	7
528	D3DU01;Q96GC9;K7EPE7;Q96GC9-2;K7EL93;K7EL74;K7ENU2;K7EK01;K7EMI0;K7ELS2;K7EL46	D3DU01;Q96GC9;K7EPE7;Q96GC9-2	Vacuole membrane protein 1	TMEM49;VMP1	tr|D3DU01|D3DU01_HUMAN Transmembrane protein 49, isoform CRA_b OS=Homo sapiens GN=TMEM49 PE=1 SV=1;sp|Q96GC9|VMP1_HUMAN Vacuole membrane protein 1 OS=Homo sapiens GN=VMP1 PE=1 SV=1;tr|K7EPE7|K7EPE7_HUMAN Vacuole membrane protein 1 (Fragment) OS=Homo sapien	1883600000	921580000	1771000000	381350000	156970000	76798000	147590000	1882100000	1999800000	2075500000	6	6	6	24.6	24.6	24.6	47.554	0	91.077	4576200000	24	11	5	4	4	5	4	4	5	4	4	20.8	15	16.5	8	9	7
529	D3DVS1;Q5BJH2	D3DVS1		TMEM128	tr|D3DVS1|D3DVS1_HUMAN Transmembrane protein 128 OS=Homo sapiens GN=TMEM128 PE=4 SV=1	108760000	0	147290000	85350000	36253000	0	49097000	139910000	0	94453000	3	3	3	16.4	16.4	16.4	18.822	0	11.089	256050000	7	2	1	1	2	1	1	2	1	1	2	7.9	8.5	16.4	3	1	3
530	D3DWV9;P51553;G5E9Q7;P51553-2;E7EQB8;E9PF84;H7C1W2;H0Y5Q7	D3DWV9;P51553;G5E9Q7;P51553-2;E7EQB8;E9PF84;H7C1W2	Isocitrate dehydrogenase [NAD] subunit, mitochondrial;Isocitrate dehydrogenase [NAD] subunit gamma, mitochondrial	hCG_2004980;IDH3G	tr|D3DWV9|D3DWV9_HUMAN HCG2004980, isoform CRA_g OS=Homo sapiens GN=IDH3G PE=1 SV=1;sp|P51553|IDH3G_HUMAN Isocitrate dehydrogenase [NAD] subunit gamma, mitochondrial OS=Homo sapiens GN=IDH3G PE=1 SV=1;tr|G5E9Q7|G5E9Q7_HUMAN HCG2004980, isoform CRA_d OS=Hom	1821200000	418720000	1171400000	227420000	121410000	27915000	78091000	1067700000	1474300000	941340000	13	13	13	50.7	50.7	50.7	36.756	0	83.667	3411300000	35	8	10	6	9	10	6	9	10	6	9	45.7	29.9	37.3	15	7	13
531	Q5HY75;D3DWX8;P98173-3;P98173-2;P98173;A6QRH7	Q5HY75;D3DWX8;P98173-3;P98173-2;P98173;A6QRH7	Protein FAM3A	FAM3A	tr|Q5HY75|Q5HY75_HUMAN Protein FAM3A OS=Homo sapiens GN=FAM3A PE=4 SV=1;tr|D3DWX8|D3DWX8_HUMAN Family with sequence similarity 3, member A, isoform CRA_c OS=Homo sapiens GN=FAM3A PE=4 SV=1;sp|P98173-3|FAM3A_HUMAN Isoform 3 of Protein FAM3A OS=Homo sapiens	0	55016000	0	3667700	0	3667700	0	0	139390000	0	3	3	3	18.1	18.1	18.1	25.83	0.00018034	3.9479	55016000	3	6	1	2	0	1	2	0	1	2	0	6.8	11.4	0	1	2	0
532	D3YTB1;F8W727;P62910;D3YTI8	D3YTB1;F8W727;P62910	60S ribosomal protein L32	RPL32	tr|D3YTB1|D3YTB1_HUMAN 60S ribosomal protein L32 (Fragment) OS=Homo sapiens GN=RPL32 PE=1 SV=1;tr|F8W727|F8W727_HUMAN 60S ribosomal protein L32 OS=Homo sapiens GN=RPL32 PE=1 SV=1;sp|P62910|RL32_HUMAN 60S ribosomal protein L32 OS=Homo sapiens GN=RPL32 PE=1	14708000000	6354400000	12096000000	4736900000	2101100000	907770000	1728100000	13889000000	12975000000	11348000000	9	9	9	52.6	52.6	52.6	15.616	0	34.894	33159000000	159	4	8	8	9	8	8	9	8	8	9	52.6	51.1	52.6	54	40	65
533	D3YTC1;Q9NZE8-2;Q9NZE8	D3YTC1;Q9NZE8-2;Q9NZE8	39S ribosomal protein L35, mitochondrial	MRPL35	tr|D3YTC1|D3YTC1_HUMAN 39S ribosomal protein L35, mitochondrial OS=Homo sapiens GN=MRPL35 PE=4 SV=1;sp|Q9NZE8-2|RM35_HUMAN Isoform 2 of 39S ribosomal protein L35, mitochondrial OS=Homo sapiens GN=MRPL35;sp|Q9NZE8|RM35_HUMAN 39S ribosomal protein L35, mitoc	55350000	35255000	454020000	41894000	4257700	2711900	34925000	86425000	146470000	430870000	2	2	2	5.1	5.1	5.1	20.072	0.00704	1.5666	544630000	6	3	1	2	2	1	2	2	1	2	2	4	5.1	5.1	1	2	3
534	D3YTC7;Q9UBM1;Q9UBM1-3;Q9UBM1-2	D3YTC7;Q9UBM1;Q9UBM1-3;Q9UBM1-2	Phosphatidylethanolamine N-methyltransferase	PEMT	tr|D3YTC7|D3YTC7_HUMAN Phosphatidylethanolamine N-methyltransferase OS=Homo sapiens GN=PEMT PE=4 SV=1;sp|Q9UBM1|PEMT_HUMAN Phosphatidylethanolamine N-methyltransferase OS=Homo sapiens GN=PEMT PE=2 SV=4;sp|Q9UBM1-3|PEMT_HUMAN Isoform 3 of Phosphatidylethano	310060000	33689000	342460000	171550000	77516000	8422300	85616000	181050000	166210000	342660000	1	1	1	6.2	6.2	6.2	22.861	0	8.7963	686220000	8	4	1	1	1	1	1	1	1	1	1	6.2	6.2	6.2	4	1	3
535	E7ENA2;D3YTF9;Q9NNW7-2;Q9NNW7;D3YTF8;A0A096LPK7;A0A096LNN4;Q9NNW7-3;A0A096LPD9;E7EWK1;Q9NNW7-4;A0A096LPH4;A0A096LP96;A0A096LPB7;A0A096LNY7	E7ENA2;D3YTF9;Q9NNW7-2;Q9NNW7;D3YTF8;A0A096LPK7;A0A096LNN4;Q9NNW7-3;A0A096LPD9;E7EWK1	Thioredoxin reductase 2, mitochondrial	TXNRD2	tr|E7ENA2|E7ENA2_HUMAN Thioredoxin reductase 2, mitochondrial OS=Homo sapiens GN=TXNRD2 PE=1 SV=1;tr|D3YTF9|D3YTF9_HUMAN Thioredoxin reductase 2, mitochondrial OS=Homo sapiens GN=TXNRD2 PE=1 SV=1;sp|Q9NNW7-2|TRXR2_HUMAN Isoform 2 of Thioredoxin reductase 2	2432300000	878270000	2878000000	221020000	86868000	31367000	102790000	2508600000	2359800000	2602600000	17	17	16	53.4	53.4	50.4	53.567	0	132.9	6188600000	65	15	17	10	14	17	10	14	16	9	13	53.4	31	45.5	22	19	24
536	D6R938;E9PBG7;E9PF82;Q13557-8;Q13557-12;Q13557-9;Q13557-10;Q13557-5;Q13557;Q13557-3;Q13557-6;Q13557-4;Q13557-11;H0Y9C2;H0Y9J2	D6R938;E9PBG7;E9PF82;Q13557-8;Q13557-12;Q13557-9;Q13557-10;Q13557-5;Q13557;Q13557-3;Q13557-6;Q13557-4;Q13557-11;H0Y9C2	Calcium/calmodulin-dependent protein kinase type II subunit delta	CAMK2D	tr|D6R938|D6R938_HUMAN Calcium/calmodulin-dependent protein kinase (CaM kinase) II delta, isoform CRA_e OS=Homo sapiens GN=CAMK2D PE=1 SV=1;tr|E9PBG7|E9PBG7_HUMAN Calcium/calmodulin-dependent protein kinase type II subunit delta OS=Homo sapiens GN=CAMK2D P	345170000	16904000	288310000	23228000	12327000	603700	10297000	237300000	100150000	203680000	9	5	5	24.5	15.1	15.1	56.298	0	36.974	650380000	12	15	8	4	5	4	2	3	4	2	3	22.5	14.5	14.1	5	2	5
537	D6R9B1;Q15723-4;Q15723-2;Q15723-3;D6RHI1;Q15723-1;Q15723	D6R9B1;Q15723-4;Q15723-2;Q15723-3;D6RHI1;Q15723-1;Q15723	ETS-related transcription factor Elf-2	ELF2	tr|D6R9B1|D6R9B1_HUMAN ETS-related transcription factor Elf-2 (Fragment) OS=Homo sapiens GN=ELF2 PE=3 SV=1;sp|Q15723-4|ELF2_HUMAN Isoform 4 of ETS-related transcription factor Elf-2 OS=Homo sapiens GN=ELF2;sp|Q15723-2|ELF2_HUMAN Isoform 2 of ETS-related tr	11518000	5845300	0	1736300	1151800	584530	0	8269800	0	0	2	2	2	16.7	16.7	16.7	27.644	0.0052381	1.7584	17363000	1	7	1	1	0	1	1	0	1	1	0	6.9	9.8	0	0	1	0
538	D6RF72;D6R9S7;D6R9M9;D6RHE3;D6RDB0;D6R9X6;Q96GZ6-6;Q96GZ6-5;Q96GZ6-9;Q96GZ6-2;Q96GZ6;D6R925;D6RJC0;D6RC02;Q96GZ6-4;Q96GZ6-3;Q96GZ6-7	D6RF72;D6R9S7;D6R9M9;D6RHE3;D6RDB0;D6R9X6;Q96GZ6-6;Q96GZ6-5;Q96GZ6-9;Q96GZ6-2;Q96GZ6;D6R925;D6RJC0;D6RC02;Q96GZ6-4;Q96GZ6-3	Solute carrier family 41 member 3	SLC41A3	tr|D6RF72|D6RF72_HUMAN Solute carrier family 41 member 3 (Fragment) OS=Homo sapiens GN=SLC41A3 PE=4 SV=1;tr|D6R9S7|D6R9S7_HUMAN Solute carrier family 41 member 3 (Fragment) OS=Homo sapiens GN=SLC41A3 PE=4 SV=1;tr|D6R9M9|D6R9M9_HUMAN Solute carrier family 4	323950000	134250000	175240000	79180000	40493000	16781000	21906000	257060000	287590000	230440000	4	4	4	45.7	45.7	45.7	14.87	0	14.428	633440000	10	17	4	2	2	4	2	2	4	2	2	45.7	22.5	22.5	4	3	3
539	D6R9N5;D6RB08;K4DIA5;P14316-2;P14316;D6RED1;H0Y956;K4DIA4	D6R9N5;D6RB08;K4DIA5;P14316-2;P14316	Interferon regulatory factor 2	IRF2	tr|D6R9N5|D6R9N5_HUMAN Interferon regulatory factor 2 (Fragment) OS=Homo sapiens GN=IRF2 PE=4 SV=1;tr|D6RB08|D6RB08_HUMAN Interferon regulatory factor 2 (Fragment) OS=Homo sapiens GN=IRF2 PE=4 SV=3;tr|K4DIA5|K4DIA5_HUMAN Interferon regulatory factor 2 (Fra	127910000	0	43686000	19067000	14213000	0	4854000	81685000	0	69471000	3	3	3	31.4	31.4	31.4	16.22	0	5.7803	171600000	6	8	3	0	2	3	0	2	3	0	2	31.4	0	20.4	4	0	2
540	D6R9P2;Q9BUT1-3;Q9BUT1	D6R9P2;Q9BUT1-3;Q9BUT1	3-hydroxybutyrate dehydrogenase type 2	SLC9B2;BDH2	tr|D6R9P2|D6R9P2_HUMAN Mitochondrial sodium/hydrogen exchanger 9B2 OS=Homo sapiens GN=SLC9B2 PE=4 SV=1;sp|Q9BUT1-3|BDH2_HUMAN Isoform 3 of 3-hydroxybutyrate dehydrogenase type 2 OS=Homo sapiens GN=BDH2;sp|Q9BUT1|BDH2_HUMAN 3-hydroxybutyrate dehydrogenase t	52404000	0	28624000	11575000	7486300	0	4089100	24474000	0	33894000	1	1	1	10.7	10.7	10.7	12.375	0.00017794	3.6412	81028000	3	3	1	0	1	1	0	1	1	0	1	10.7	0	10.7	2	0	1
541	D6R9Q7;Q8NBW4-4;Q8NBW4-3;Q8NBW4;D6RER8;E7ESU6;D6RG31;D6RHF5;B3KVK8;Q8NBW4-2	D6R9Q7;Q8NBW4-4;Q8NBW4-3;Q8NBW4;D6RER8;E7ESU6;D6RG31;D6RHF5;B3KVK8;Q8NBW4-2	Sodium-coupled neutral amino acid transporter 9	SLC38A9	tr|D6R9Q7|D6R9Q7_HUMAN Putative sodium-coupled neutral amino acid transporter 9 (Fragment) OS=Homo sapiens GN=SLC38A9 PE=1 SV=1;sp|Q8NBW4-4|S38A9_HUMAN Isoform 4 of Putative sodium-coupled neutral amino acid transporter 9 OS=Homo sapiens GN=SLC38A9;sp|Q8NB	114030000	0	121850000	12415000	6001800	0	6413000	83473000	0	81559000	2	2	2	10.5	10.5	10.5	51.857	0	14.427	235880000	6	10	2	0	1	2	0	1	2	0	1	10.5	0	5.7	3	0	3
542	D6RIU2;D6RDP6;D6RHU6;D6RDY1;D6RA76;D6RC11;D6R9S8;D6RCE6;D6RFX6;D6RDI6;D6RCR8;Q9NY35-2;Q9NY35;D6RD48;D6RAZ7;H0Y8T9;D6R9K1;D6RB31;D6RCP3;Q9NY35-3	D6RIU2;D6RDP6;D6RHU6;D6RDY1;D6RA76;D6RC11;D6R9S8;D6RCE6;D6RFX6;D6RDI6;D6RCR8;Q9NY35-2;Q9NY35;D6RD48;D6RAZ7;H0Y8T9	Claudin domain-containing protein 1	CLDND1	tr|D6RIU2|D6RIU2_HUMAN Claudin domain-containing protein 1 (Fragment) OS=Homo sapiens GN=CLDND1 PE=4 SV=1;tr|D6RDP6|D6RDP6_HUMAN Claudin domain-containing protein 1 (Fragment) OS=Homo sapiens GN=CLDND1 PE=4 SV=1;tr|D6RHU6|D6RHU6_HUMAN Claudin domain-contai	97592000	43403000	84923000	20538000	8872000	3945700	7720300	89958000	0	61151000	4	4	4	35.5	35.5	35.5	16.049	0	8.4151	225920000	5	20	1	3	2	1	3	2	1	3	2	10.9	25.4	21	1	2	2
543	D6R9Z7;P15954	D6R9Z7;P15954	Cytochrome c oxidase subunit 7C, mitochondrial	COX7C	tr|D6R9Z7|D6R9Z7_HUMAN Cytochrome c oxidase subunit 7C, mitochondrial OS=Homo sapiens GN=COX7C PE=1 SV=1;sp|P15954|COX7C_HUMAN Cytochrome c oxidase subunit 7C, mitochondrial OS=Homo sapiens GN=COX7C PE=1 SV=1	1151300000	641090000	2089900000	647050000	191880000	106850000	348320000	1868200000	1258000000	1507700000	2	2	2	26.8	26.8	26.8	6.3824	0.0006605	2.4009	3882300000	14	2	1	1	2	1	1	2	1	1	2	16.1	16.1	26.8	4	5	5
544	D6RA24;Q9NZF1	D6RA24;Q9NZF1	Placenta-specific gene 8 protein	PLAC8	tr|D6RA24|D6RA24_HUMAN Placenta-specific 8, isoform CRA_b OS=Homo sapiens GN=PLAC8 PE=4 SV=1;sp|Q9NZF1|PLAC8_HUMAN Placenta-specific gene 8 protein OS=Homo sapiens GN=PLAC8 PE=2 SV=1	503550000	142220000	804600000	725190000	251770000	71111000	402300000	306560000	429280000	839030000	1	1	1	44.8	44.8	44.8	6.7139	0	8.6585	1450400000	8	2	1	1	1	1	1	1	1	1	1	44.8	44.8	44.8	2	1	5
545	H0Y9C3;Q4VXL4;D6RAA5;Q4VXL8;E7EMZ9;E9PBC6;O95359-2;O95359-6;O95359-1;O95359-5;O95359-3;O95359	H0Y9C3;Q4VXL4;D6RAA5;Q4VXL8;E7EMZ9;E9PBC6;O95359-2;O95359-6;O95359-1;O95359-5;O95359-3;O95359	Transforming acidic coiled-coil-containing protein 2	TACC2	tr|H0Y9C3|H0Y9C3_HUMAN Transforming acidic coiled-coil-containing protein 2 (Fragment) OS=Homo sapiens GN=TACC2 PE=4 SV=1;tr|Q4VXL4|Q4VXL4_HUMAN HCG41426, isoform CRA_c OS=Homo sapiens GN=TACC2 PE=1 SV=1;tr|D6RAA5|D6RAA5_HUMAN Transforming acidic coiled-co	14326000	0	0	1023300	1023300	0	0	10286000	0	0	1	1	1	9.2	9.2	9.2	18.334	0	4.7727	14326000	1	12	1	0	0	1	0	0	1	0	0	9.2	0	0	1	0	0
546	D6RAD4;P50613;D6REC6;D6R9G1;D6RFL0;D6RGG9;D6RI01;D6R9Z2;D6RF14;D6RIG9;Q9C098	D6RAD4;P50613;D6REC6;D6R9G1	Cyclin-dependent kinase 7	CDK7	tr|D6RAD4|D6RAD4_HUMAN Cyclin-dependent kinase 7 OS=Homo sapiens GN=CDK7 PE=1 SV=1;sp|P50613|CDK7_HUMAN Cyclin-dependent kinase 7 OS=Homo sapiens GN=CDK7 PE=1 SV=1;tr|D6REC6|D6REC6_HUMAN Cyclin-dependent kinase 7 (Fragment) OS=Homo sapiens GN=CDK7 PE=1 SV=	116630000	0	60930000	9864500	6479500	0	3385000	91242000	0	0	6	6	6	24.3	24.3	24.3	34.643	0	10.288	177560000	6	11	4	0	2	4	0	2	4	0	2	18.8	0	5.5	4	0	2
547	D6RAN6;F6SKB8;D6RB24;Q9NVZ3-3;Q9NVZ3;Q9NVZ3-2	D6RAN6;F6SKB8;D6RB24;Q9NVZ3-3;Q9NVZ3;Q9NVZ3-2	Adaptin ear-binding coat-associated protein 2	NECAP2	tr|D6RAN6|D6RAN6_HUMAN Adaptin ear-binding coat-associated protein 2 OS=Homo sapiens GN=NECAP2 PE=1 SV=1;tr|F6SKB8|F6SKB8_HUMAN Adaptin ear-binding coat-associated protein 2 OS=Homo sapiens GN=NECAP2 PE=1 SV=1;tr|D6RB24|D6RB24_HUMAN Adaptin ear-binding coa	0	0	30359000	5059900	0	0	5059900	0	0	25017000	1	1	1	19.8	19.8	19.8	11.325	0	5.2274	30359000	1	6	0	0	1	0	0	1	0	0	1	0	0	19.8	0	0	1
548	D6RAS9;O14827	D6RAS9;O14827	Ras-specific guanine nucleotide-releasing factor 2	RASGRF2	tr|D6RAS9|D6RAS9_HUMAN Ras-specific guanine nucleotide-releasing factor 2 OS=Homo sapiens GN=RASGRF2 PE=1 SV=1;sp|O14827|RGRF2_HUMAN Ras-specific guanine nucleotide-releasing factor 2 OS=Homo sapiens GN=RASGRF2 PE=1 SV=2	0	0	6398200	88864	0	0	88864	0	0	7201900	1	1	1	1.7	1.7	1.7	130.7	0.0022665	2.0575	6398200	1	2	0	0	1	0	0	1	0	0	1	0	0	1.7	0	0	1
549	D6RDM0;D6RG01;D6RBD4;F2Z2H9;D6RGG1;D6RAU1;E9PBE1;Q05513-2;Q05513-3;Q05513	D6RDM0;D6RG01;D6RBD4;F2Z2H9;D6RGG1;D6RAU1;E9PBE1;Q05513-2;Q05513-3;Q05513	Protein kinase C zeta type	PRKCZ	tr|D6RDM0|D6RDM0_HUMAN Protein kinase C zeta type (Fragment) OS=Homo sapiens GN=PRKCZ PE=1 SV=1;tr|D6RG01|D6RG01_HUMAN Protein kinase C zeta type (Fragment) OS=Homo sapiens GN=PRKCZ PE=1 SV=1;tr|D6RBD4|D6RBD4_HUMAN Protein kinase C zeta type (Fragment) OS=	9864900	0	0	1973000	1973000	0	0	5675000	0	0	1	1	1	19.2	19.2	19.2	8.0207	0.00034507	3.0544	9864900	1	10	1	0	0	1	0	0	1	0	0	19.2	0	0	1	0	0
550	D6RAV6;Q0VDI3	D6RAV6;Q0VDI3	Transmembrane protein C5orf28	C5orf28	tr|D6RAV6|D6RAV6_HUMAN Transmembrane protein C5orf28 (Fragment) OS=Homo sapiens GN=C5orf28 PE=4 SV=1;sp|Q0VDI3|CE028_HUMAN Transmembrane protein C5orf28 OS=Homo sapiens GN=C5orf28 PE=2 SV=1	48755000	0	27644000	7639900	4875500	0	2764400	37019000	0	0	1	1	1	8	8	8	19.719	0	4.3944	76399000	0	2	1	0	1	1	0	1	1	0	1	8	0	8	0	0	0
551	D6RAX7;Q9BT78;D6RFN0;Q9BT78-2;D6RD63	D6RAX7;Q9BT78;D6RFN0;Q9BT78-2;D6RD63	COP9 signalosome complex subunit 4	COPS4	tr|D6RAX7|D6RAX7_HUMAN COP9 signalosome complex subunit 4 OS=Homo sapiens GN=COPS4 PE=1 SV=1;sp|Q9BT78|CSN4_HUMAN COP9 signalosome complex subunit 4 OS=Homo sapiens GN=COPS4 PE=1 SV=1;tr|D6RFN0|D6RFN0_HUMAN COP9 signalosome complex subunit 4 OS=Homo sapien	714270000	102330000	462010000	49177000	27472000	3935700	17770000	505520000	298300000	443490000	15	15	15	49.8	49.8	49.8	47.726	0	35.181	1278600000	27	5	10	5	9	10	5	9	10	5	9	33.3	17.6	33.1	11	6	10
552	D6RAZ0;F2Z2L2;E9PD12;Q96AX9-9;Q96AX9-10;Q96AX9-8;Q96AX9-4;Q96AX9-6;Q96AX9-2;Q96AX9-12;Q96AX9-3;Q96AX9;Q96AX9-11;Q96AX9-13;Q96AX9-14;D6RED3;Q96AX9-7;Q96AX9-5;D6R9Q6;D6RFJ2;D6RE96;H0YAM8	D6RAZ0;F2Z2L2;E9PD12;Q96AX9-9;Q96AX9-10;Q96AX9-8;Q96AX9-4;Q96AX9-6;Q96AX9-2;Q96AX9-12;Q96AX9-3;Q96AX9;Q96AX9-11;Q96AX9-13;Q96AX9-14;D6RED3;Q96AX9-7;Q96AX9-5	E3 ubiquitin-protein ligase MIB2	MIB2	tr|D6RAZ0|D6RAZ0_HUMAN E3 ubiquitin-protein ligase MIB2 OS=Homo sapiens GN=MIB2 PE=1 SV=1;tr|F2Z2L2|F2Z2L2_HUMAN E3 ubiquitin-protein ligase MIB2 OS=Homo sapiens GN=MIB2 PE=1 SV=1;tr|E9PD12|E9PD12_HUMAN E3 ubiquitin-protein ligase MIB2 OS=Homo sapiens GN=M	1161400000	0	0	23229000	23229000	0	0	1138500000	0	0	3	2	2	3.7	2.9	2.9	88.661	0.0088647	1.4813	1161400000	2	22	3	1	0	2	0	0	2	0	0	3.7	0.7	0	2	0	0
553	D6RB32;P03951-2;P03951	D6RB32;P03951-2;P03951	Coagulation factor XI;Coagulation factor XIa heavy chain;Coagulation factor XIa light chain	F11	tr|D6RB32|D6RB32_HUMAN Coagulation factor XI OS=Homo sapiens GN=F11 PE=4 SV=1;sp|P03951-2|FA11_HUMAN Isoform 2 of Coagulation factor XI OS=Homo sapiens GN=F11;sp|P03951|FA11_HUMAN Coagulation factor XI OS=Homo sapiens GN=F11 PE=1 SV=1	25369000	0	14124000	3038000	1951500	0	1086500	0	0	12178000	2	2	2	13	13	13	18.46	0.00066247	2.4554	39494000	2	3	1	0	1	1	0	1	1	0	1	6.2	0	6.8	1	0	1
554	D6RB81;Q9UHK6;Q9UHK6-5;V9GZ45;V9GYP4;V9GYU9;Q9UHK6-4;Q9UHK6-2	D6RB81;Q9UHK6;Q9UHK6-5;V9GZ45;V9GYP4;V9GYU9;Q9UHK6-4;Q9UHK6-2	Alpha-methylacyl-CoA racemase	AMACR	tr|D6RB81|D6RB81_HUMAN Alpha-methylacyl-CoA racemase OS=Homo sapiens GN=AMACR PE=4 SV=1;sp|Q9UHK6|AMACR_HUMAN Alpha-methylacyl-CoA racemase OS=Homo sapiens GN=AMACR PE=1 SV=2;sp|Q9UHK6-5|AMACR_HUMAN Isoform 4 of Alpha-methylacyl-CoA racemase OS=Homo sapien	403170000	165170000	359100000	48813000	21220000	8693100	18900000	377390000	340180000	280880000	8	8	8	22.1	22.1	22.1	40.674	0	59.435	927440000	19	8	5	5	6	5	5	6	5	5	6	16.6	14.4	20.2	6	6	7
555	D6RB92;Q5JS54-3;Q5JS54;Q5JS54-2	D6RB92;Q5JS54-3;Q5JS54;Q5JS54-2	Proteasome assembly chaperone 4	PSMG4	tr|D6RB92|D6RB92_HUMAN Proteasome assembly chaperone 4 OS=Homo sapiens GN=PSMG4 PE=4 SV=1;sp|Q5JS54-3|PSMG4_HUMAN Isoform 3 of Proteasome assembly chaperone 4 OS=Homo sapiens GN=PSMG4;sp|Q5JS54|PSMG4_HUMAN Proteasome assembly chaperone 4 OS=Homo sapiens GN	0	0	7769800	1110000	0	0	1110000	0	0	6402700	1	1	1	23.1	23.1	23.1	11.655	0.0082683	1.517	7769800	1	4	0	0	1	0	0	1	0	0	1	0	0	23.1	0	0	1
556	D6RBB0;O60683;O60683-2;D6RA89;J3QRM4	D6RBB0;O60683;O60683-2;D6RA89	Peroxisome biogenesis factor 10	PEX10	tr|D6RBB0|D6RBB0_HUMAN Peroxisome biogenesis factor 10 OS=Homo sapiens GN=PEX10 PE=4 SV=1;sp|O60683|PEX10_HUMAN Peroxisome biogenesis factor 10 OS=Homo sapiens GN=PEX10 PE=1 SV=1;sp|O60683-2|PEX10_HUMAN Isoform 2 of Peroxisome biogenesis factor 10 OS=Homo	124010000	0	113990000	14000000	7294800	0	6705100	87708000	0	103090000	5	5	5	20.7	20.7	20.7	36.869	0	18.689	238000000	13	5	5	0	4	5	0	4	5	0	4	20.7	0	17.3	8	0	5
557	D6RBW1;P06730;P06730-3;P06730-2;H0Y8J7	D6RBW1;P06730;P06730-3;P06730-2	Eukaryotic translation initiation factor 4E	EIF4E	tr|D6RBW1|D6RBW1_HUMAN Eukaryotic translation initiation factor 4E OS=Homo sapiens GN=EIF4E PE=1 SV=1;sp|P06730|IF4E_HUMAN Eukaryotic translation initiation factor 4E OS=Homo sapiens GN=EIF4E PE=1 SV=2;sp|P06730-3|IF4E_HUMAN Isoform 3 of Eukaryotic transla	576440000	128730000	396130000	68831000	36028000	8045400	24758000	367050000	445120000	439110000	3	3	3	13.1	13.1	13.1	28.512	0	10.563	1101300000	10	5	3	2	2	3	2	2	3	2	2	13.1	10.2	10.2	5	2	3
558	D6RCM7;Q8TEZ7	D6RCM7;Q8TEZ7	Membrane progestin receptor beta	PAQR8	tr|D6RCM7|D6RCM7_HUMAN Membrane progestin receptor beta (Fragment) OS=Homo sapiens GN=PAQR8 PE=4 SV=1;sp|Q8TEZ7|MPRB_HUMAN Membrane progestin receptor beta OS=Homo sapiens GN=PAQR8 PE=2 SV=1	166130000	44797000	103380000	39289000	20767000	5599700	12923000	125130000	132070000	68346000	2	2	2	24.1	24.1	24.1	12.982	0	6.7645	314310000	7	2	2	1	2	2	1	2	2	1	2	24.1	10.7	24.1	4	0	3
559	D6RCP8;O43766;O43766-2;O43766-3	D6RCP8;O43766;O43766-2	Lipoyl synthase, mitochondrial	LIAS	tr|D6RCP8|D6RCP8_HUMAN Lipoyl synthase, mitochondrial OS=Homo sapiens GN=LIAS PE=4 SV=1;sp|O43766|LIAS_HUMAN Lipoyl synthase, mitochondrial OS=Homo sapiens GN=LIAS PE=1 SV=3;sp|O43766-2|LIAS_HUMAN Isoform 2 of Lipoyl synthase, mitochondrial OS=Homo sapiens	129790000	12397000	139430000	20115000	9270400	885500	9959400	92158000	56071000	89022000	3	3	3	20.7	20.7	20.7	27.509	0	8.124	281610000	7	4	3	1	3	3	1	3	3	1	3	20.7	4.5	20.7	3	1	3
560	D6RCP9;D6RFG8;P27707	D6RCP9;D6RFG8;P27707	Deoxycytidine kinase	DCK	tr|D6RCP9|D6RCP9_HUMAN Deoxycytidine kinase OS=Homo sapiens GN=DCK PE=1 SV=1;tr|D6RFG8|D6RFG8_HUMAN Deoxycytidine kinase OS=Homo sapiens GN=DCK PE=1 SV=1;sp|P27707|DCK_HUMAN Deoxycytidine kinase OS=Homo sapiens GN=DCK PE=1 SV=1	24712000	7433000	12748000	3741100	2059400	619420	1062300	24712000	21875000	14349000	1	1	1	7.5	7.5	7.5	22.891	0.0022713	2.1099	44893000	3	3	1	1	1	1	1	1	1	1	1	7.5	7.5	7.5	1	1	1
561	D6RDU4;F8W784;Q6TCH7-4;Q6TCH7-3;Q6TCH7-2;Q6TCH7	D6RDU4;F8W784;Q6TCH7-4;Q6TCH7-3;Q6TCH7-2;Q6TCH7	Progestin and adipoQ receptor family member 3	PAQR3	tr|D6RDU4|D6RDU4_HUMAN Progestin and adipoQ receptor family member 3 OS=Homo sapiens GN=PAQR3 PE=4 SV=1;tr|F8W784|F8W784_HUMAN Progestin and adipoQ receptor family member 3 OS=Homo sapiens GN=PAQR3 PE=4 SV=1;sp|Q6TCH7-4|PAQR3_HUMAN Isoform 4 of Progestin a	24045000	0	0	6011200	6011200	0	0	17078000	0	0	1	1	1	27.9	27.9	27.9	8.2254	0	6.9939	24045000	1	6	1	0	0	1	0	0	1	0	0	27.9	0	0	1	0	0
562	D6REA1;Q9H173;A0RZB6;D6RIU8	D6REA1;Q9H173	Nucleotide exchange factor SIL1	SIL1	tr|D6REA1|D6REA1_HUMAN Nucleotide exchange factor SIL1 OS=Homo sapiens GN=SIL1 PE=1 SV=1;sp|Q9H173|SIL1_HUMAN Nucleotide exchange factor SIL1 OS=Homo sapiens GN=SIL1 PE=1 SV=1	530760000	200580000	643650000	65476000	25274000	9551400	30650000	549490000	586350000	544740000	6	6	6	16	16	16	52.748	0	26.633	1375000000	21	4	5	5	4	5	5	4	5	5	4	13.2	13.2	10.5	8	6	7
563	D6REB4;Q9H074-3;Q9H074-2;Q9H074;D6RJF2;D6RJ02;D6R9H8	D6REB4;Q9H074-3;Q9H074-2;Q9H074;D6RJF2	Polyadenylate-binding protein-interacting protein 1	PAIP1	tr|D6REB4|D6REB4_HUMAN Uncharacterized protein OS=Homo sapiens GN=PAIP1 PE=1 SV=1;sp|Q9H074-3|PAIP1_HUMAN Isoform 3 of Polyadenylate-binding protein-interacting protein 1 OS=Homo sapiens GN=PAIP1;sp|Q9H074-2|PAIP1_HUMAN Isoform 2 of Polyadenylate-binding p	253730000	33125000	187460000	26351000	14096000	1840300	10414000	173910000	119490000	184630000	6	6	6	21.9	21.9	21.9	39.908	0	21.541	474310000	9	7	4	2	3	4	2	3	4	2	3	17.7	6	10	3	2	4
564	D6RGI3;D6RER5;Q9NVA2;Q9NVA2-2;D6RDU5;D6RDP1;D6R9Y6;H0Y961;H0Y9G8	D6RGI3;D6RER5;Q9NVA2;Q9NVA2-2;D6RDU5	Septin-11	2011-09-01	tr|D6RGI3|D6RGI3_HUMAN Septin 11, isoform CRA_b OS=Homo sapiens GN=SEPT11 PE=1 SV=1;tr|D6RER5|D6RER5_HUMAN Septin-11 OS=Homo sapiens GN=SEPT11 PE=1 SV=1;sp|Q9NVA2|SEP11_HUMAN Septin-11 OS=Homo sapiens GN=SEPT11 PE=1 SV=3;sp|Q9NVA2-2|SEP11_HUMAN Isoform 2 o	400120000	140470000	436260000	37571000	15389000	5402700	16779000	377500000	387410000	345240000	9	9	5	31.1	31.1	20.2	49.005	0	29.237	976850000	18	9	6	3	8	6	3	8	3	3	4	21.6	10.8	27.8	7	2	9
565	D6REX3;O94979-3;O94979-9;O94979-2;O94979;O94979-8;O94979-6;O94979-10;O94979-4;D6RHZ5;H7BXG7;O94979-7;H0YAB3;O94979-5;H0Y8V7;H0Y8W8;H0Y9K1;H0YAF5;H0Y9T9;D6RE64;D6RCQ9;H0Y9V3;D6RBT0;D6RHE8	D6REX3;O94979-3;O94979-9;O94979-2;O94979;O94979-8;O94979-6;O94979-10;O94979-4;D6RHZ5;H7BXG7;O94979-7	Protein transport protein Sec31A	SEC31A	tr|D6REX3|D6REX3_HUMAN Protein transport protein Sec31A OS=Homo sapiens GN=SEC31A PE=1 SV=1;sp|O94979-3|SC31A_HUMAN Isoform 3 of Protein transport protein Sec31A OS=Homo sapiens GN=SEC31A;sp|O94979-9|SC31A_HUMAN Isoform 9 of Protein transport protein Sec31	5187700000	1021000000	3944000000	191560000	97882000	19263000	74415000	3824500000	3197400000	3232500000	32	32	32	34.3	34.3	34.3	136.22	0	276.86	10153000000	126	24	26	16	22	26	16	22	26	16	22	28.4	18.5	24.6	45	30	51
566	D6RF48;Q9P2W9;D6RD65;D6RC71;H0YAL4	D6RF48;Q9P2W9;D6RD65	Syntaxin-18	STX18	tr|D6RF48|D6RF48_HUMAN Syntaxin-18 OS=Homo sapiens GN=STX18 PE=1 SV=1;sp|Q9P2W9|STX18_HUMAN Syntaxin-18 OS=Homo sapiens GN=STX18 PE=1 SV=1;tr|D6RD65|D6RD65_HUMAN Syntaxin-18 (Fragment) OS=Homo sapiens GN=STX18 PE=1 SV=1	2001300000	538960000	2328400000	211680000	87012000	23433000	101240000	1404700000	1517000000	1639000000	17	17	17	66.2	66.2	66.2	35.42	0	93.001	4868700000	69	5	13	11	13	13	11	13	13	11	13	52.6	49.7	53.6	24	21	24
567	D6RHI7;D6RG18;P51946	D6RHI7;D6RG18;P51946	Cyclin-H	CCNH	tr|D6RHI7|D6RHI7_HUMAN Uncharacterized protein OS=Homo sapiens GN=CCNH PE=1 SV=1;tr|D6RG18|D6RG18_HUMAN Cyclin-H OS=Homo sapiens GN=CCNH PE=1 SV=1;sp|P51946|CCNH_HUMAN Cyclin-H OS=Homo sapiens GN=CCNH PE=1 SV=1	79474000	10653000	13322000	6465500	4967100	665820	832600	42304000	32127000	16490000	3	3	3	16.1	16.1	16.1	28.869	0.00018165	4.1101	103450000	5	3	3	1	1	3	1	1	3	1	1	16.1	6.4	6.4	2	1	2
568	D6RIE3;D6RGV5;H0UI06;P14406;D6R9C3	D6RIE3;D6RGV5;H0UI06;P14406;D6R9C3	Cytochrome c oxidase subunit 7A2, mitochondrial	COX7A2	tr|D6RIE3|D6RIE3_HUMAN Uncharacterized protein OS=Homo sapiens GN=COX7A2 PE=1 SV=1;tr|D6RGV5|D6RGV5_HUMAN Cytochrome c oxidase subunit 7A2, mitochondrial (Fragment) OS=Homo sapiens GN=COX7A2 PE=1 SV=1;tr|H0UI06|H0UI06_HUMAN Cytochrome c oxidase subunit 7A2	6677000000	2562300000	5739200000	2496400000	1112800000	427050000	956530000	4428300000	4971100000	5050300000	2	2	2	25.3	25.3	25.3	10.264	0	11.306	14979000000	28	5	2	2	2	2	2	2	2	2	2	25.3	25.3	25.3	11	10	7
569	D6RHD2;O43609;D6REX7	D6RHD2;O43609	Protein sprouty homolog 1	SPRY1	tr|D6RHD2|D6RHD2_HUMAN Protein sprouty homolog 1 (Fragment) OS=Homo sapiens GN=SPRY1 PE=1 SV=1;sp|O43609|SPY1_HUMAN Protein sprouty homolog 1 OS=Homo sapiens GN=SPRY1 PE=1 SV=2	264610000	104300000	147390000	39715000	20354000	8023300	11338000	154710000	198610000	211570000	6	6	6	35.4	35.4	35.4	22.882	0	12.7	516300000	12	3	5	2	3	5	2	3	5	2	3	31.6	10.5	19.1	5	2	5
570	D6RHD3;Q9BS16;D6RJF0;H0Y9K8;D6RC76;D6R984;D6RBN6;D6RAX0	D6RHD3;Q9BS16;D6RJF0;H0Y9K8;D6RC76	Centromere protein K	CENPK	tr|D6RHD3|D6RHD3_HUMAN Centromere protein K OS=Homo sapiens GN=CENPK PE=4 SV=1;sp|Q9BS16|CENPK_HUMAN Centromere protein K OS=Homo sapiens GN=CENPK PE=1 SV=1;tr|D6RJF0|D6RJF0_HUMAN Centromere protein K OS=Homo sapiens GN=CENPK PE=4 SV=1;tr|H0Y9K8|H0Y9K8_HUM	3537600000	10032000	40645000	239220000	235840000	668790	2709600	2965400000	19852000	16027000	5	5	5	27.6	27.6	27.6	28.245	0	18.304	3588300000	7	8	5	1	1	5	1	1	5	1	1	27.6	7.5	8.4	5	1	1
571	D6RHG0;P78383-2;D6RDY9;D6R9G9;D6RE58;D6RB73	D6RHG0;P78383-2;D6RDY9;D6R9G9	Solute carrier family 35 member B1	SLC35B1	tr|D6RHG0|D6RHG0_HUMAN Solute carrier family 35 member B1 (Fragment) OS=Homo sapiens GN=SLC35B1 PE=1 SV=3;sp|P78383-2|S35B1_HUMAN Isoform 2 of Solute carrier family 35 member B1 OS=Homo sapiens GN=SLC35B1;tr|D6RDY9|D6RDY9_HUMAN Solute carrier family 35 mem	34286000	10516000	51887000	7437600	2637400	808890	3991300	36747000	0	40065000	4	4	3	20.3	20.3	16.8	31.51	0	6.0797	96689000	4	6	2	1	2	2	1	2	2	0	2	8	3.5	12.9	1	0	3
572	D6RHI9;O00584;D6REQ6;A0A087WZM2;H0YAE9;A0A087WWI1;O00584-2;J3QQ64;Q07343-4;Q07343-2;Q07343-3;Q07343	D6RHI9;O00584;D6REQ6;A0A087WZM2;H0YAE9	Ribonuclease T2	RNASET2	tr|D6RHI9|D6RHI9_HUMAN Ribonuclease T2 (Fragment) OS=Homo sapiens GN=RNASET2 PE=1 SV=3;sp|O00584|RNT2_HUMAN Ribonuclease T2 OS=Homo sapiens GN=RNASET2 PE=1 SV=2;tr|D6REQ6|D6REQ6_HUMAN Ribonuclease T2 OS=Homo sapiens GN=RNASET2 PE=1 SV=1;tr|A0A087WZM2|A0A08	2358400000	931860000	1304400000	255260000	131020000	51770000	72469000	1867500000	2027400000	1676900000	10	10	10	42.9	42.9	42.9	29.215	0	134.6	4594700000	43	12	9	7	6	9	7	6	9	7	6	33.5	37.4	28.3	13	18	12
573	D6RIY6;Q06265;Q06265-2;D6R905;Q06265-3;Q06265-4;D6RA17;H0Y9L5;D6RAP4	D6RIY6;Q06265;Q06265-2;D6R905;Q06265-3;Q06265-4;D6RA17	Exosome complex component RRP45	EXOSC9	tr|D6RIY6|D6RIY6_HUMAN Exosome complex component RRP45 OS=Homo sapiens GN=EXOSC9 PE=1 SV=1;sp|Q06265|EXOS9_HUMAN Exosome complex component RRP45 OS=Homo sapiens GN=EXOSC9 PE=1 SV=3;sp|Q06265-2|EXOS9_HUMAN Isoform 2 of Exosome complex component RRP45 OS=Hom	2250900000	584390000	1574700000	259420000	132410000	34376000	92632000	1350700000	1548300000	1310100000	7	7	7	22.7	22.7	22.7	46.977	0	64.233	4410100000	25	9	6	6	7	6	6	7	6	6	7	19.9	19.9	22.7	12	4	9
574	D6RJ07;Q9UL40;Q9UL40-2;Q9UL40-3;B7Z6B6;B7Z6Q2;B7Z4J8;B7Z4N4	D6RJ07;Q9UL40;Q9UL40-2;Q9UL40-3;B7Z6B6;B7Z6Q2	Zinc finger protein 346	ZNF346	tr|D6RJ07|D6RJ07_HUMAN Zinc finger protein 346 OS=Homo sapiens GN=ZNF346 PE=1 SV=1;sp|Q9UL40|ZN346_HUMAN Zinc finger protein 346 OS=Homo sapiens GN=ZNF346 PE=1 SV=1;sp|Q9UL40-2|ZN346_HUMAN Isoform 2 of Zinc finger protein 346 OS=Homo sapiens GN=ZNF346;sp|Q	1023800000	223820000	636420000	117750000	63986000	13989000	39776000	667150000	713300000	572980000	9	9	9	38.1	38.1	38.1	34.645	0	37.704	1884000000	27	8	9	6	7	9	6	7	9	6	7	38.1	29	33.9	12	5	10
575	D6W5U7;Q9UJ98-2;Q9UJ98-3;Q9UJ98	D6W5U7;Q9UJ98-2;Q9UJ98-3;Q9UJ98	Cohesin subunit SA-3	STAG3	tr|D6W5U7|D6W5U7_HUMAN Cohesin subunit SA-3 OS=Homo sapiens GN=STAG3 PE=4 SV=1;sp|Q9UJ98-2|STAG3_HUMAN Isoform 2 of Cohesin subunit SA-3 OS=Homo sapiens GN=STAG3;sp|Q9UJ98-3|STAG3_HUMAN Isoform 3 of Cohesin subunit SA-3 OS=Homo sapiens GN=STAG3;sp|Q9UJ98|S	121900000	0	0	1998300	1998300	0	0	86579000	0	0	3	1	1	2.3	1	1	139.12	1	-2	121900000	1	4	3	1	2	1	0	0	1	0	0	2.3	0.6	1.3	1	0	0
576	E1P5H9;Q96BD0-2;Q96BD0-3;Q96BD0-4;Q96BD0	E1P5H9;Q96BD0-2;Q96BD0-3;Q96BD0-4;Q96BD0	Solute carrier organic anion transporter family member 4A1	SLCO4A1	tr|E1P5H9|E1P5H9_HUMAN Solute carrier organic anion transporter family member 4A1 OS=Homo sapiens GN=SLCO4A1 PE=1 SV=1;sp|Q96BD0-2|SO4A1_HUMAN Isoform 2 of Solute carrier organic anion transporter family member 4A1 OS=Homo sapiens GN=SLCO4A1;sp|Q96BD0-3|SO	124950000	28260000	60276000	9282100	5432700	1228700	2620700	74509000	58754000	101040000	2	2	2	5.2	5.2	5.2	65.837	0	9.1401	213490000	8	5	2	2	1	2	2	1	2	2	1	5.2	5.2	3.1	3	3	2
577	E3W994;J3KR49;O75122	E3W994;J3KR49;O75122	CLIP-associating protein 2	CLASP2	tr|E3W994|E3W994_HUMAN CLIP-associating protein 2 OS=Homo sapiens GN=CLASP2 PE=1 SV=2;tr|J3KR49|J3KR49_HUMAN CLIP-associating protein 2 OS=Homo sapiens GN=CLASP2 PE=1 SV=1;sp|O75122|CLAP2_HUMAN CLIP-associating protein 2 OS=Homo sapiens GN=CLASP2 PE=1 SV=2	136270000	5368500	51876000	2276600	1603100	63159	610310	106000000	0	52649000	15	10	1	16.9	12.5	1.3	138.86	0	15.844	193510000	10	3	11	4	5	7	1	3	1	0	1	13.4	3.7	5.9	6	1	3
578	E5RFJ1;Q96MF7;E5RIM1;A0A087WTZ8;E5RHW9;H0YB96	E5RFJ1;Q96MF7;E5RIM1;A0A087WTZ8;E5RHW9	E3 SUMO-protein ligase NSE2	NSMCE2	tr|E5RFJ1|E5RFJ1_HUMAN E3 SUMO-protein ligase NSE2 OS=Homo sapiens GN=NSMCE2 PE=1 SV=1;sp|Q96MF7|NSE2_HUMAN E3 SUMO-protein ligase NSE2 OS=Homo sapiens GN=NSMCE2 PE=1 SV=2;tr|E5RIM1|E5RIM1_HUMAN E3 SUMO-protein ligase NSE2 (Fragment) OS=Homo sapiens GN=NSM	221980000	63980000	20900000	27896000	20180000	5816400	1900000	200160000	104670000	68879000	5	5	5	28.9	28.9	28.9	21.807	0	10.024	306860000	8	6	4	2	1	4	2	1	4	2	1	25.1	11.2	5.3	4	2	2
579	E5RFP0;Q8WVJ2	E5RFP0;Q8WVJ2	NudC domain-containing protein 2	NUDCD2	tr|E5RFP0|E5RFP0_HUMAN NudC domain-containing protein 2 OS=Homo sapiens GN=NUDCD2 PE=1 SV=1;sp|Q8WVJ2|NUDC2_HUMAN NudC domain-containing protein 2 OS=Homo sapiens GN=NUDCD2 PE=1 SV=1	17324000	0	9498900	4470400	2887300	0	1583200	12304000	0	11510000	1	1	1	13.6	13.6	13.6	14.745	0	5.2358	26823000	2	2	1	0	1	1	0	1	1	0	1	13.6	0	13.6	1	0	1
580	E5RIY0;E5RFT4;Q8N4L2;E5RJC2;E5RIP9	E5RIY0;E5RFT4;Q8N4L2;E5RJC2;E5RIP9	Type 2 phosphatidylinositol 4,5-bisphosphate 4-phosphatase	TMEM55A	tr|E5RIY0|E5RIY0_HUMAN Type 2 phosphatidylinositol 4,5-bisphosphate 4-phosphatase OS=Homo sapiens GN=TMEM55A PE=1 SV=1;tr|E5RFT4|E5RFT4_HUMAN Type 2 phosphatidylinositol 4,5-bisphosphate 4-phosphatase (Fragment) OS=Homo sapiens GN=TMEM55A PE=1 SV=3;sp|Q8N4	0	0	20594000	2059400	0	0	2059400	0	0	18364000	2	1	1	21.7	15.7	15.7	17.745	0	5.4694	20594000	1	5	1	0	2	0	0	1	0	0	1	6	0	21.7	0	0	1
581	H0YBX2;G5EA19;U3KQS5;E5RG17;Q6P1N9;E5RI69;E5RID7;E5RJY6;E5RG62;E5RK70;E5RGF2;Q6P1N9-2	H0YBX2;G5EA19;U3KQS5;E5RG17;Q6P1N9;E5RI69;E5RID7;E5RJY6;E5RG62;E5RK70;E5RGF2;Q6P1N9-2	Putative deoxyribonuclease TATDN1	TATDN1	tr|H0YBX2|H0YBX2_HUMAN Putative deoxyribonuclease TATDN1 (Fragment) OS=Homo sapiens GN=TATDN1 PE=1 SV=1;tr|G5EA19|G5EA19_HUMAN Putative deoxyribonuclease TATDN1 OS=Homo sapiens GN=TATDN1 PE=1 SV=1;tr|U3KQS5|U3KQS5_HUMAN Putative deoxyribonuclease TATDN1 OS	0	0	33746000	2410400	0	0	2410400	0	0	36981000	2	2	2	12.4	12.4	12.4	22.558	0.0003375	2.7412	33746000	2	12	1	0	2	1	0	2	1	0	2	5.9	0	12.4	1	0	1
582	E5RJ10;E5RHB8;E5RJX6;E5RG91;Q8NEZ2-3;Q8NEZ2-2;Q8NEZ2	E5RJ10;E5RHB8;E5RJX6;E5RG91;Q8NEZ2-3;Q8NEZ2-2;Q8NEZ2	Vacuolar protein sorting-associated protein 37A	VPS37A	tr|E5RJ10|E5RJ10_HUMAN Vacuolar protein sorting-associated protein 37A OS=Homo sapiens GN=VPS37A PE=1 SV=1;tr|E5RHB8|E5RHB8_HUMAN Vacuolar protein sorting-associated protein 37A OS=Homo sapiens GN=VPS37A PE=1 SV=1;tr|E5RJX6|E5RJX6_HUMAN Vacuolar protein so	0	0	38326000	9581600	0	0	9581600	0	0	31804000	1	1	1	37.7	37.7	37.7	5.9598	0	7.8223	38326000	2	7	1	0	1	1	0	1	1	0	1	37.7	0	37.7	1	0	1
583	E5RGS5;E5RGQ3;Q9H446-2;Q9H446	E5RGS5;E5RGQ3;Q9H446-2;Q9H446	RWD domain-containing protein 1	RWDD1	tr|E5RGS5|E5RGS5_HUMAN RWD domain-containing protein 1 (Fragment) OS=Homo sapiens GN=RWDD1 PE=1 SV=1;tr|E5RGQ3|E5RGQ3_HUMAN RWD domain-containing protein 1 (Fragment) OS=Homo sapiens GN=RWDD1 PE=1 SV=1;sp|Q9H446-2|RWDD1_HUMAN Isoform 2 of RWD domain-contai	54265000	0	0	10853000	10853000	0	0	42634000	0	0	1	1	1	25.4	25.4	25.4	7.935	0.00017544	3.3638	54265000	1	4	1	0	0	1	0	0	1	0	0	25.4	0	0	1	0	0
584	E5RGS2;Q9H6H4;Q9H6H4-2	E5RGS2;Q9H6H4;Q9H6H4-2	Receptor expression-enhancing protein;Receptor expression-enhancing protein 4	REEP4	tr|E5RGS2|E5RGS2_HUMAN Receptor expression-enhancing protein 4 OS=Homo sapiens GN=REEP4 PE=1 SV=1;sp|Q9H6H4|REEP4_HUMAN Receptor expression-enhancing protein 4 OS=Homo sapiens GN=REEP4 PE=1 SV=1;sp|Q9H6H4-2|REEP4_HUMAN Isoform 2 of Receptor expression-enha	362260000	388750000	254320000	67022000	24151000	25916000	16955000	191810000	953490000	250710000	5	5	5	17.1	17.1	17.1	28.214	0	4.4234	1005300000	9	3	3	1	3	3	1	3	3	1	3	11.2	4	10	3	1	5
585	E5RGS4;O60925	E5RGS4;O60925	Prefoldin subunit 1	PFDN1	tr|E5RGS4|E5RGS4_HUMAN Prefoldin subunit 1 OS=Homo sapiens GN=PFDN1 PE=1 SV=1;sp|O60925|PFD1_HUMAN Prefoldin subunit 1 OS=Homo sapiens GN=PFDN1 PE=1 SV=2	0	67949000	83625000	18947000	0	8493600	10453000	0	174480000	73463000	3	3	3	23.9	23.9	23.9	13.466	0.00034447	3.0286	151570000	4	2	0	2	3	0	2	3	0	2	3	0	17.9	23.9	0	2	2
586	E5RHG5;E7EW39;Q7Z2H8-4;Q7Z2H8-3;Q7Z2H8	E5RHG5;E7EW39;Q7Z2H8-4;Q7Z2H8-3;Q7Z2H8	Proton-coupled amino acid transporter 1	SLC36A1	tr|E5RHG5|E5RHG5_HUMAN Proton-coupled amino acid transporter 1 (Fragment) OS=Homo sapiens GN=SLC36A1 PE=4 SV=1;tr|E7EW39|E7EW39_HUMAN Proton-coupled amino acid transporter 1 OS=Homo sapiens GN=SLC36A1 PE=4 SV=1;sp|Q7Z2H8-4|S36A1_HUMAN Isoform 3 of Proton-c	47092000	0	0	15697000	15697000	0	0	35908000	0	0	1	1	1	15.2	15.2	15.2	10.629	0.0005005	2.5914	47092000	1	5	1	0	0	1	0	0	1	0	0	15.2	0	0	1	0	0
587	E5RHG8;Q15369;Q15369-2;R4GMY8	E5RHG8;Q15369;Q15369-2;R4GMY8	Transcription elongation factor B polypeptide 1	TCEB1	tr|E5RHG8|E5RHG8_HUMAN Transcription elongation factor B polypeptide 1 (Fragment) OS=Homo sapiens GN=TCEB1 PE=1 SV=1;sp|Q15369|ELOC_HUMAN Transcription elongation factor B polypeptide 1 OS=Homo sapiens GN=TCEB1 PE=1 SV=1;sp|Q15369-2|ELOC_HUMAN Isoform 2 of	734480000	99596000	509300000	167920000	91810000	12449000	63662000	556640000	314240000	580820000	6	6	6	74.2	74.2	74.2	9.9601	0	22.847	1343400000	16	4	6	2	4	6	2	4	6	2	4	74.2	27	62.9	8	2	6
588	E5RHV4;H0YAP1;E5RHR6;Q9Y5V0	E5RHV4;H0YAP1;E5RHR6;Q9Y5V0	Zinc finger protein 706	ZNF706	tr|E5RHV4|E5RHV4_HUMAN Zinc finger protein 706 OS=Homo sapiens GN=ZNF706 PE=1 SV=1;tr|H0YAP1|H0YAP1_HUMAN Zinc finger protein 706 (Fragment) OS=Homo sapiens GN=ZNF706 PE=1 SV=1;tr|E5RHR6|E5RHR6_HUMAN Zinc finger protein 706 OS=Homo sapiens GN=ZNF706 PE=1 S	61361000	0	118330000	59896000	20454000	0	39442000	76628000	0	88948000	1	1	1	22.9	22.9	22.9	5.2721	0.00017822	3.6761	179690000	2	4	1	0	1	1	0	1	1	0	1	22.9	0	22.9	1	0	1
589	E5RHU1;Q96MH6;H0YC64;E5RGT2;E5RJN2;E5RJI9;Q96MH6-2;H0YAY9;Q49A68;H0YAX4;E5RJ96	E5RHU1;Q96MH6;H0YC64;E5RGT2;E5RJN2;E5RJI9;Q96MH6-2	Transmembrane protein 68	TMEM68	tr|E5RHU1|E5RHU1_HUMAN Transmembrane protein 68 (Fragment) OS=Homo sapiens GN=TMEM68 PE=4 SV=1;sp|Q96MH6|TMM68_HUMAN Transmembrane protein 68 OS=Homo sapiens GN=TMEM68 PE=2 SV=2;tr|H0YC64|H0YC64_HUMAN Transmembrane protein 68 (Fragment) OS=Homo sapiens GN=	122790000	12882000	133640000	24483000	11163000	1171100	12149000	91841000	39052000	157350000	5	5	5	39.6	39.6	39.6	20.825	0	9.4676	269320000	9	11	4	1	4	4	1	4	4	1	4	34.6	7.1	30.8	4	0	5
590	E5RIE1;Q96KB5;Q96KB5-2	E5RIE1;Q96KB5;Q96KB5-2	Lymphokine-activated killer T-cell-originated protein kinase	PBK	tr|E5RIE1|E5RIE1_HUMAN Lymphokine-activated killer T-cell-originated protein kinase OS=Homo sapiens GN=PBK PE=1 SV=1;sp|Q96KB5|TOPK_HUMAN Lymphokine-activated killer T-cell-originated protein kinase OS=Homo sapiens GN=PBK PE=1 SV=3;sp|Q96KB5-2|TOPK_HUMAN I	0	0	8464900	2116200	0	0	2116200	0	0	10257000	1	1	1	30.2	30.2	30.2	6.9923	0.0070445	1.5727	8464900	1	3	0	0	1	0	0	1	0	0	1	0	0	30.2	0	0	1
591	E5RIV7;Q8IV48	E5RIV7;Q8IV48	3-5 exoribonuclease 1	ERI1	tr|E5RIV7|E5RIV7_HUMAN 3-5 exoribonuclease 1 OS=Homo sapiens GN=ERI1 PE=1 SV=1;sp|Q8IV48|ERI1_HUMAN 3-5 exoribonuclease 1 OS=Homo sapiens GN=ERI1 PE=1 SV=3	0	0	327060000	46723000	0	0	46723000	0	0	358340000	1	1	1	15.2	15.2	15.2	10.993	0.00066489	2.4979	327060000	1	2	0	0	1	0	0	1	0	0	1	0	0	15.2	0	0	1
592	E5RIW3;E5RJD8;O75347;E5RHG6;O75347-2;E5RIX8	E5RIW3;E5RJD8;O75347;E5RHG6;O75347-2	Tubulin-specific chaperone A	TBCA	tr|E5RIW3|E5RIW3_HUMAN Tubulin-specific chaperone A OS=Homo sapiens GN=TBCA PE=1 SV=1;tr|E5RJD8|E5RJD8_HUMAN Tubulin-specific chaperone A OS=Homo sapiens GN=TBCA PE=1 SV=1;sp|O75347|TBCA_HUMAN Tubulin-specific chaperone A OS=Homo sapiens GN=TBCA PE=1 SV=3;	314810000	428290000	307800000	150130000	44973000	61185000	43971000	387610000	637130000	534580000	6	6	6	65.5	65.5	65.5	10.08	0	17.5	1050900000	17	6	3	5	4	3	5	4	3	5	4	32.1	57.1	32.1	4	8	5
593	E5RJN7;E7EVI1;F8VPI7;E7EPX0;E7EVJ4;E9PH62;Q9NUL3-6;Q9NUL3-8;Q9NUL3-3;Q9NUL3-7;Q9NUL3-2;Q9NUL3;G5EA18;Q9NUL3-4;E5RJ67;E5RFK1	E5RJN7;E7EVI1;F8VPI7;E7EPX0;E7EVJ4;E9PH62;Q9NUL3-6;Q9NUL3-8;Q9NUL3-3;Q9NUL3-7;Q9NUL3-2;Q9NUL3;G5EA18;Q9NUL3-4	Double-stranded RNA-binding protein Staufen homolog 2	STAU2	tr|E5RJN7|E5RJN7_HUMAN Double-stranded RNA-binding protein Staufen homolog 2 (Fragment) OS=Homo sapiens GN=STAU2 PE=1 SV=1;tr|E7EVI1|E7EVI1_HUMAN Double-stranded RNA-binding protein Staufen homolog 2 OS=Homo sapiens GN=STAU2 PE=1 SV=1;tr|F8VPI7|F8VPI7_HUMA	174290000	90609000	162470000	18581000	7578000	3939500	7063800	173850000	237150000	191440000	8	6	6	24.1	19.4	19.4	34.861	0	26.799	427370000	11	16	5	4	5	4	3	4	4	3	4	14.1	14.4	17.8	4	4	3
594	E5RJS5;Q15390;Q15390-2;H0YBZ4;E5RIB6;H7C5V5;H0YF01	E5RJS5;Q15390;Q15390-2;H0YBZ4	Mitochondrial fission regulator 1	MTFR1	tr|E5RJS5|E5RJS5_HUMAN Uncharacterized protein OS=Homo sapiens GN=MTFR1 PE=1 SV=1;sp|Q15390|MTFR1_HUMAN Mitochondrial fission regulator 1 OS=Homo sapiens GN=MTFR1 PE=1 SV=2;sp|Q15390-2|MTFR1_HUMAN Isoform 2 of Mitochondrial fission regulator 1 OS=Homo sapi	480450000	19135000	752890000	73675000	28261000	1125600	44288000	538490000	0	652400000	8	8	8	33.8	33.8	33.8	35.324	0	15.146	1252500000	9	7	5	1	5	5	1	5	5	1	5	21.5	4.7	17.7	5	1	3
595	E5RK69;H0YC77	E5RK69	Annexin	ANXA6	tr|E5RK69|E5RK69_HUMAN Annexin OS=Homo sapiens GN=ANXA6 PE=1 SV=1	0	32880000	0	996370	0	996370	0	0	77455000	0	29	2	2	67	4.3	4.3	51.776	0	4.6955	32880000	2	2	22	22	22	0	2	0	0	2	0	53.7	51.7	52.8	0	2	0
596	E7EM64;Q7L5N1;H7C3T0	E7EM64;Q7L5N1	COP9 signalosome complex subunit 6	COPS6	tr|E7EM64|E7EM64_HUMAN COP9 signalosome complex subunit 6 OS=Homo sapiens GN=COPS6 PE=1 SV=1;sp|Q7L5N1|CSN6_HUMAN COP9 signalosome complex subunit 6 OS=Homo sapiens GN=COPS6 PE=1 SV=1	305030000	43560000	264260000	43776000	21788000	3111400	18876000	289990000	109160000	156480000	7	7	7	32.2	32.2	32.2	36.064	0	12.277	612860000	12	3	5	2	6	5	2	6	5	2	6	24.5	10.7	27.3	5	1	6
597	E7EMM4;Q13510;Q13510-2;Q13510-3	E7EMM4;Q13510;Q13510-2;Q13510-3	Acid ceramidase;Acid ceramidase subunit alpha;Acid ceramidase subunit beta	ASAH1	tr|E7EMM4|E7EMM4_HUMAN Acid ceramidase OS=Homo sapiens GN=ASAH1 PE=1 SV=1;sp|Q13510|ASAH1_HUMAN Acid ceramidase OS=Homo sapiens GN=ASAH1 PE=1 SV=5;sp|Q13510-2|ASAH1_HUMAN Isoform 2 of Acid ceramidase OS=Homo sapiens GN=ASAH1;sp|Q13510-3|ASAH1_HUMAN Isoform	1809300000	853370000	2188400000	202130000	75387000	35557000	91184000	1584600000	1919700000	1957400000	13	13	13	44.6	44.6	44.6	41.796	0	50.632	4851100000	47	4	9	11	10	9	11	10	9	11	10	30.3	40	33	13	15	19
598	E7EUI7;E7EMN6;Q6NXS1;P41236	E7EUI7;E7EMN6;Q6NXS1;P41236	Protein phosphatase inhibitor 2-like protein 3;Protein phosphatase inhibitor 2	PPP1R2;PPP1R2P3	tr|E7EUI7|E7EUI7_HUMAN Protein phosphatase inhibitor 2 OS=Homo sapiens GN=PPP1R2 PE=1 SV=1;tr|E7EMN6|E7EMN6_HUMAN Protein phosphatase inhibitor 2 (Fragment) OS=Homo sapiens GN=PPP1R2 PE=1 SV=1;sp|Q6NXS1|IPP2M_HUMAN Protein phosphatase inhibitor 2-like prot	145490000	0	134100000	46597000	24248000	0	22350000	111010000	0	125020000	2	2	2	32.5	32.5	32.5	8.9811	0	5.4197	279580000	7	4	2	0	2	2	0	2	2	0	2	32.5	0	32.5	4	0	3
599	G3V2V8;J3KMY5;G3V3E8;E7EMS2;G3V3D1;P61916-2;P61916;H0YIZ1	G3V2V8;J3KMY5;G3V3E8;E7EMS2;G3V3D1;P61916-2;P61916;H0YIZ1	Epididymal secretory protein E1	NPC2	tr|G3V2V8|G3V2V8_HUMAN Epididymal secretory protein E1 (Fragment) OS=Homo sapiens GN=NPC2 PE=1 SV=1;tr|J3KMY5|J3KMY5_HUMAN Epididymal secretory protein E1 OS=Homo sapiens GN=NPC2 PE=1 SV=1;tr|G3V3E8|G3V3E8_HUMAN Epididymal secretory protein E1 OS=Homo sapi	1344700000	438210000	705510000	311050000	168080000	54776000	88189000	1069700000	795500000	897900000	4	4	4	47.5	47.5	47.5	13.078	0	18.934	2488400000	21	8	3	4	3	3	4	3	3	4	3	39.3	47.5	39.3	6	9	6
600	E7EMT5;Q5J9B1;P04798;P04798-2	E7EMT5;Q5J9B1;P04798;P04798-2	Cytochrome P450;Cytochrome P450 1A1	CYP1A1	tr|E7EMT5|E7EMT5_HUMAN Cytochrome P450 OS=Homo sapiens GN=CYP1A1 PE=3 SV=1;tr|Q5J9B1|Q5J9B1_HUMAN Cytochrome P450 OS=Homo sapiens GN=CYP1A1 PE=2 SV=1;sp|P04798|CP1A1_HUMAN Cytochrome P450 1A1 OS=Homo sapiens GN=CYP1A1 PE=1 SV=1;sp|P04798-2|CP1A1_HUMAN Isof	77925000	0	0	2997100	2997100	0	0	55526000	0	0	3	3	3	9.1	9.1	9.1	54.799	0.0006628	2.4619	77925000	2	4	3	0	0	3	0	0	3	0	0	9.1	0	0	2	0	0
601	E7EN19;E7ESS2;O95819-2;O95819;O95819-3;E7ENQ1;G3XAA2;H7C360;G5E948;O95819-4;O95819-5;E7EX83;C9J840;H7C0P6;Q8N4C8-5;Q8N4C8-2;Q8N4C8-3;Q9UKE5-8;Q9UKE5-5;Q9UKE5-7;Q9UKE5-3;Q9UKE5-6;Q9UKE5-2;Q9UKE5-4;Q9UKE5;H7C3Z6;C9J338;I3L2I2;F6V107;Q9NRD5;E7ETN6;I3L1U1;O94763-2;O94763-3;O94763	E7EN19;E7ESS2;O95819-2;O95819;O95819-3;E7ENQ1;G3XAA2;H7C360;G5E948;O95819-4;O95819-5;E7EX83;C9J840;H7C0P6	Mitogen-activated protein kinase kinase kinase kinase 4	MAP4K4	tr|E7EN19|E7EN19_HUMAN Mitogen-activated protein kinase kinase kinase kinase 4 OS=Homo sapiens GN=MAP4K4 PE=1 SV=1;tr|E7ESS2|E7ESS2_HUMAN Mitogen-activated protein kinase kinase kinase kinase 4 OS=Homo sapiens GN=MAP4K4 PE=1 SV=3;sp|O95819-2|M4K4_HUMAN Iso	793510000	388750000	810650000	29307000	11669000	5716900	11921000	747320000	911750000	613580000	29	29	20	30	30	24.6	144.92	0	116.14	1992900000	50	35	19	10	15	19	10	15	15	5	11	25.1	7.9	16.7	21	11	18
602	H0Y612;E7EN20;Q9UPN9-2;Q9UPN9	H0Y612;E7EN20;Q9UPN9-2;Q9UPN9	E3 ubiquitin-protein ligase TRIM33	TRIM33	tr|H0Y612|H0Y612_HUMAN E3 ubiquitin-protein ligase TRIM33 (Fragment) OS=Homo sapiens GN=TRIM33 PE=1 SV=1;tr|E7EN20|E7EN20_HUMAN E3 ubiquitin-protein ligase TRIM33 OS=Homo sapiens GN=TRIM33 PE=1 SV=2;sp|Q9UPN9-2|TRI33_HUMAN Isoform Beta of E3 ubiquitin-prot	176310000	0	116810000	6106600	3673100	0	2433600	153130000	0	97815000	4	4	4	5.3	5.3	5.3	98.891	0	23.584	293120000	12	4	4	0	4	4	0	4	4	0	4	5.3	0	5.3	7	0	5
603	E7EN73;Q8IZA0-2;Q8IZA0;C9J519;Q8IZA0-3;B1AN15;H0Y4S8;B4DYG9;C9JVB2	E7EN73;Q8IZA0-2;Q8IZA0;C9J519;Q8IZA0-3	Dyslexia-associated protein KIAA0319-like protein	KIAA0319L	tr|E7EN73|E7EN73_HUMAN Dyslexia-associated protein KIAA0319-like protein (Fragment) OS=Homo sapiens GN=KIAA0319L PE=1 SV=1;sp|Q8IZA0-2|K319L_HUMAN Isoform 2 of Dyslexia-associated protein KIAA0319-like protein OS=Homo sapiens GN=KIAA0319L;sp|Q8IZA0|K319L_H	1591200000	502040000	1235300000	83213000	39780000	12551000	30882000	1192300000	1252600000	1172300000	19	19	19	22	22	22	113.23	0	86.319	3328500000	55	9	13	9	12	13	9	12	13	9	12	17.1	10.5	15.4	21	17	17
604	E7END6;P04070;P04070-2;H7BYX9;E7ENR9;E7EU72;E7EVH6	E7END6;P04070;P04070-2;H7BYX9	Vitamin K-dependent protein C;Vitamin K-dependent protein C light chain;Vitamin K-dependent protein C heavy chain;Activation peptide	PROC	tr|E7END6|E7END6_HUMAN Vitamin K-dependent protein C heavy chain OS=Homo sapiens GN=PROC PE=3 SV=1;sp|P04070|PROC_HUMAN Vitamin K-dependent protein C OS=Homo sapiens GN=PROC PE=1 SV=1;sp|P04070-2|PROC_HUMAN Isoform 2 of Vitamin K-dependent protein C OS=Hom	275980000	101050000	350270000	34633000	13142000	4811700	16679000	303970000	235410000	336530000	7	7	7	22	22	22	55.389	0	30.05	727300000	13	7	5	2	4	5	2	4	5	2	4	17.6	8.7	15.6	4	4	5
605	E7ENN3;Q8NF91-4;Q8NF91;Q8NF91-8;Q8NF91-2;H0Y326;H0Y325;Q8NF91-7;A0A087WYJ5;F5GYQ7;F5H4Q0;Q5JV20;F8WAI0;F5GXQ8;Q8NF91-9;Q8NF91-3;Q8NF91-5;Q8NF91-6	E7ENN3;Q8NF91-4;Q8NF91;Q8NF91-8;Q8NF91-2	Nesprin-1	SYNE1	tr|E7ENN3|E7ENN3_HUMAN Nesprin-1 OS=Homo sapiens GN=SYNE1 PE=1 SV=2;sp|Q8NF91-4|SYNE1_HUMAN Isoform 4 of Nesprin-1 OS=Homo sapiens GN=SYNE1;sp|Q8NF91|SYNE1_HUMAN Nesprin-1 OS=Homo sapiens GN=SYNE1 PE=1 SV=4;sp|Q8NF91-8|SYNE1_HUMAN Isoform 8 of Nesprin-1 OS	10050000000	3718200000	5499400000	35813000	18679000	6911200	10222000	6599900000	5554300000	5488100000	6	6	6	1.1	1.1	1.1	964.83	0	5.1497	19267000000	21	18	4	3	2	4	3	2	4	3	2	0.7	0.4	0.3	8	8	5
606	E7EV99;E7ENY0;P35611-2;P35611-6;P35611;P35611-3;P35611-4;P35611-5;H0Y9H2;D6RF25;D6RAH3;D6RJE2;H0YFD8;H0YG19	E7EV99;E7ENY0;P35611-2;P35611-6;P35611;P35611-3;P35611-4;P35611-5;H0Y9H2	Alpha-adducin	ADD1	tr|E7EV99|E7EV99_HUMAN Alpha-adducin OS=Homo sapiens GN=ADD1 PE=1 SV=1;tr|E7ENY0|E7ENY0_HUMAN Alpha-adducin OS=Homo sapiens GN=ADD1 PE=1 SV=1;sp|P35611-2|ADDA_HUMAN Isoform 2 of Alpha-adducin OS=Homo sapiens GN=ADD1;sp|P35611-6|ADDA_HUMAN Isoform 6 of Alph	8089300000	2939900000	7142700000	567870000	252790000	91872000	223210000	6366900000	7698500000	6708500000	30	30	29	63.3	63.3	62	70.055	0	247.75	18172000000	140	14	24	24	24	24	24	24	23	23	23	52.8	54.7	58.5	53	40	47
607	E7EW77;E7EP65;F8WAL6;Q9NYB9-2;Q9NYB9-4;Q9NYB9;E9PEZ7;Q9NYB9-3;E7EUA1;F8WAU3;F8WCD7;F8WAZ8;F8WBL5;F8WAQ3;F8WEB9;H7C3Q7;H0Y6B5	E7EW77;E7EP65;F8WAL6;Q9NYB9-2;Q9NYB9-4;Q9NYB9;E9PEZ7;Q9NYB9-3	Abl interactor 2	ABI2	tr|E7EW77|E7EW77_HUMAN Abl interactor 2 OS=Homo sapiens GN=ABI2 PE=1 SV=1;tr|E7EP65|E7EP65_HUMAN Abl interactor 2 (Fragment) OS=Homo sapiens GN=ABI2 PE=1 SV=1;tr|F8WAL6|F8WAL6_HUMAN Abl interactor 2 OS=Homo sapiens GN=ABI2 PE=1 SV=2;sp|Q9NYB9-2|ABI2_HUMAN	12409000	8506200	9449900	1445900	590890	405060	449990	0	18257000	10637000	3	3	3	7.9	7.9	7.9	52.789	0.00017931	3.8332	30365000	4	17	2	1	2	2	1	2	2	1	2	4.8	3.1	5.4	1	1	2
608	E7EPB3;P50914	E7EPB3;P50914	60S ribosomal protein L14	RPL14	tr|E7EPB3|E7EPB3_HUMAN 60S ribosomal protein L14 OS=Homo sapiens GN=RPL14 PE=1 SV=1;sp|P50914|RL14_HUMAN 60S ribosomal protein L14 OS=Homo sapiens GN=RPL14 PE=1 SV=4	20544000000	9161400000	18686000000	4839100000	2054400000	916140000	1868600000	17017000000	17474000000	15204000000	9	9	9	58.9	58.9	58.9	14.558	0	87.103	48391000000	133	2	8	8	6	8	8	6	8	8	6	54	52.4	46.8	41	48	44
609	E9PDR5;E7EPI0;Q9P2D0-2;Q9P2D0;D6R9F4	E9PDR5;E7EPI0;Q9P2D0-2;Q9P2D0;D6R9F4	Inhibitor of Bruton tyrosine kinase	IBTK	tr|E9PDR5|E9PDR5_HUMAN Inhibitor of Bruton tyrosine kinase OS=Homo sapiens GN=IBTK PE=1 SV=1;tr|E7EPI0|E7EPI0_HUMAN Inhibitor of Bruton tyrosine kinase OS=Homo sapiens GN=IBTK PE=1 SV=1;sp|Q9P2D0-2|IBTK_HUMAN Isoform 2 of Inhibitor of Bruton tyrosine kinas	0	0	7014000	104690	0	0	104690	0	0	8499100	2	2	2	2.3	2.3	2.3	127.23	0.0005042	2.6948	7014000	2	5	0	1	1	0	1	1	0	1	1	0	1.2	1.1	0	1	1
610	E7ES33;E7EPK1;Q16181-2;Q16181;G3V1Q4;H0Y3Y4;Q5JXL7;Q6ZU15	E7ES33;E7EPK1;Q16181-2;Q16181;G3V1Q4;H0Y3Y4	Septin-7	2007-09-01	tr|E7ES33|E7ES33_HUMAN Septin-7 OS=Homo sapiens GN=SEPT7 PE=1 SV=3;tr|E7EPK1|E7EPK1_HUMAN Septin-7 OS=Homo sapiens GN=SEPT7 PE=1 SV=2;sp|Q16181-2|SEPT7_HUMAN Isoform 2 of Septin-7 OS=Homo sapiens GN=SEPT7;sp|Q16181|SEPT7_HUMAN Septin-7 OS=Homo sapiens GN=S	1567800000	496630000	1199900000	136010000	65326000	20693000	49994000	1352700000	1293800000	1298000000	11	11	11	37.2	37.2	37.2	48.715	0	50.318	3264300000	40	8	9	8	7	9	8	7	9	8	7	30.7	24.7	23.5	17	11	12
611	E7EPN9;Q9Y520-2;Q9Y520-6;Q9Y520-4;Q9Y520-5;Q9Y520;Q9Y520-7;Q9Y520-3;H7C5N8	E7EPN9;Q9Y520-2;Q9Y520-6;Q9Y520-4;Q9Y520-5;Q9Y520;Q9Y520-7;Q9Y520-3	Protein PRRC2C	PRRC2C	tr|E7EPN9|E7EPN9_HUMAN Protein PRRC2C OS=Homo sapiens GN=PRRC2C PE=1 SV=1;sp|Q9Y520-2|PRC2C_HUMAN Isoform 2 of Protein PRRC2C OS=Homo sapiens GN=PRRC2C;sp|Q9Y520-6|PRC2C_HUMAN Isoform 6 of Protein PRRC2C OS=Homo sapiens GN=PRRC2C;sp|Q9Y520-4|PRC2C_HUMAN Is	490510000	131580000	309910000	7281200	3832100	1027900	2421100	443980000	244560000	308400000	15	15	15	8.3	8.3	8.3	308.77	0	26.555	931990000	19	9	10	5	3	10	5	3	10	5	3	6.4	2	1.2	11	4	4
612	E7EPS8;P28827;P28827-2;J3KT55;Q49AC9;J3KRV2;J3QRB4;A0A087WY22;A0A087X1X2;B1AJS0;B1AJR6;B1AJR8;B1AJR9;A0A075B6H0;O14522;O14522-1	E7EPS8;P28827;P28827-2	Protein-tyrosine-phosphatase;Receptor-type tyrosine-protein phosphatase mu	PTPRM	tr|E7EPS8|E7EPS8_HUMAN Receptor-type tyrosine-protein phosphatase mu OS=Homo sapiens GN=PTPRM PE=1 SV=2;sp|P28827|PTPRM_HUMAN Receptor-type tyrosine-protein phosphatase mu OS=Homo sapiens GN=PTPRM PE=1 SV=2;sp|P28827-2|PTPRM_HUMAN Isoform 2 of Receptor-typ	463980000	8853800	376540000	11031000	6025700	114980	4890100	356190000	0	332330000	17	16	16	18	17.2	17.2	157.07	0	44.891	849370000	24	16	12	2	12	11	1	11	11	1	11	12.6	1.9	13.7	11	1	12
613	E7EPT4;P19404	E7EPT4;P19404	NADH dehydrogenase [ubiquinone] flavoprotein 2, mitochondrial	NDUFV2	tr|E7EPT4|E7EPT4_HUMAN NADH dehydrogenase [ubiquinone] flavoprotein 2, mitochondrial OS=Homo sapiens GN=NDUFV2 PE=1 SV=1;sp|P19404|NDUV2_HUMAN NADH dehydrogenase [ubiquinone] flavoprotein 2, mitochondrial OS=Homo sapiens GN=NDUFV2 PE=1 SV=2	10008000000	3244200000	8300100000	1436800000	667180000	216280000	553340000	8257200000	6205100000	10657000000	12	12	12	49.6	49.6	49.6	27.907	0	180.1	21552000000	92	2	11	11	10	11	11	10	11	11	10	47.2	47.2	45.2	32	35	25
614	Q7Z554;E7EPW4;P45379-12;P45379-9;P45379-7;P45379-11;P45379-6;P45379-8;P45379-10;P45379-4;P45379-5;P45379-3;P45379-2;P45379	Q7Z554;E7EPW4;P45379-12;P45379-9;P45379-7;P45379-11;P45379-6;P45379-8;P45379-10;P45379-4;P45379-5;P45379-3;P45379-2;P45379	Troponin T, cardiac muscle	HNTN1;TNNT2	tr|Q7Z554|Q7Z554_HUMAN Troponin T cardiac isoform OS=Homo sapiens GN=HNTN1 PE=2 SV=1;tr|E7EPW4|E7EPW4_HUMAN Troponin T, cardiac muscle (Fragment) OS=Homo sapiens GN=TNNT2 PE=4 SV=1;sp|P45379-12|TNNT2_HUMAN Isoform 12 of Troponin T, cardiac muscle OS=Homo s	71111000	0	117890000	14538000	5470100	0	9068400	51057000	0	101640000	1	1	1	6.6	6.6	6.6	27.529	0.010015	1.3853	189000000	2	14	1	0	1	1	0	1	1	0	1	6.6	0	6.6	1	0	1
615	E7EQ34;O14653;O14653-2;I3L4Z6;O14653-3;I3L1K7;I3L3V4;I3L0K1;I3NI02	E7EQ34;O14653;O14653-2;I3L4Z6;O14653-3;I3L1K7;I3L3V4;I3L0K1	Golgi SNAP receptor complex member 2	GOSR2	tr|E7EQ34|E7EQ34_HUMAN Golgi SNAP receptor complex member 2 OS=Homo sapiens GN=GOSR2 PE=3 SV=2;sp|O14653|GOSR2_HUMAN Golgi SNAP receptor complex member 2 OS=Homo sapiens GN=GOSR2 PE=1 SV=2;sp|O14653-2|GOSR2_HUMAN Isoform B of Golgi SNAP receptor complex me	2753400000	559710000	2527700000	417200000	196670000	39979000	180550000	1796700000	1948900000	2083100000	8	8	8	46.1	46.1	46.1	26.864	0	132.18	5840800000	46	9	7	4	6	7	4	6	7	4	6	42.7	19.4	40.1	19	8	19
616	E7EQ61;Q9GZZ9;E7EWE1;Q9GZZ9-2;C9J5W5;C9JRV9;C9J0F6	E7EQ61;Q9GZZ9;E7EWE1;Q9GZZ9-2;C9J5W5;C9JRV9	Ubiquitin-like modifier-activating enzyme 5	UBA5	tr|E7EQ61|E7EQ61_HUMAN Ubiquitin-like modifier-activating enzyme 5 OS=Homo sapiens GN=UBA5 PE=1 SV=1;sp|Q9GZZ9|UBA5_HUMAN Ubiquitin-like modifier-activating enzyme 5 OS=Homo sapiens GN=UBA5 PE=1 SV=1;tr|E7EWE1|E7EWE1_HUMAN Ubiquitin-like modifier-activatin	241730000	11547000	159420000	19652000	11511000	549870	7591400	180310000	0	185190000	5	5	5	23.6	23.6	23.6	41.85	0	18.601	412700000	9	7	3	1	3	3	1	3	3	1	3	13	3.4	14.6	5	1	3
617	E7EQ69;Q9GZZ1;C9J5D1;A0A087WWJ2;Q9GZZ1-2;C9JZU6;C9J5J3;F8WCK0;B0AZT5	E7EQ69;Q9GZZ1;C9J5D1;A0A087WWJ2;Q9GZZ1-2;C9JZU6;C9J5J3	N-alpha-acetyltransferase 50	NAA50	tr|E7EQ69|E7EQ69_HUMAN N-alpha-acetyltransferase 50 OS=Homo sapiens GN=NAA50 PE=1 SV=1;sp|Q9GZZ1|NAA50_HUMAN N-alpha-acetyltransferase 50 OS=Homo sapiens GN=NAA50 PE=1 SV=1;tr|C9J5D1|C9J5D1_HUMAN N-alpha-acetyltransferase 50 OS=Homo sapiens GN=NAA50 PE=1 S	110470000	67983000	91343000	22483000	9205900	5665300	7611900	71065000	163840000	111080000	6	6	6	41.7	41.7	41.7	19.311	0	49.444	269800000	10	9	3	4	2	3	4	2	3	4	2	23.8	25.6	16.7	4	4	2
618	E7EQR4;P15311	E7EQR4;P15311	Ezrin	EZR	tr|E7EQR4|E7EQR4_HUMAN Ezrin OS=Homo sapiens GN=EZR PE=1 SV=3;sp|P15311|EZRI_HUMAN Ezrin OS=Homo sapiens GN=EZR PE=1 SV=4	1293600000	553550000	1015500000	75333000	34041000	14567000	26725000	1040200000	1247900000	1037600000	21	12	12	40.4	26.5	26.5	69.371	0	46.569	2862700000	39	2	16	15	17	9	10	9	9	10	9	33.3	30	32.1	13	13	13
619	E7EQR8;Q9GZM5;D6RFI3;D6RGY8;H0Y9A1;D6RBQ1;D6RA04;D6RAY4	E7EQR8;Q9GZM5;D6RFI3	Protein YIPF3;Protein YIPF3, 36 kDa form III	YIPF3	tr|E7EQR8|E7EQR8_HUMAN Protein YIPF3 OS=Homo sapiens GN=YIPF3 PE=1 SV=1;sp|Q9GZM5|YIPF3_HUMAN Protein YIPF3 OS=Homo sapiens GN=YIPF3 PE=1 SV=1;tr|D6RFI3|D6RFI3_HUMAN Protein YIPF3 (Fragment) OS=Homo sapiens GN=YIPF3 PE=1 SV=1	1366400000	259790000	1432200000	191140000	85398000	16237000	89510000	1037300000	931500000	1168700000	8	8	8	28.7	28.7	28.7	38.889	0	22.834	3058300000	32	8	7	4	8	7	4	8	7	4	8	25.6	18.5	28.7	13	7	12
620	E9PES6;E7ES08;E7EQU1;O15347	E9PES6;E7ES08;E7EQU1;O15347	High mobility group protein B3	HMGB3	tr|E9PES6|E9PES6_HUMAN High mobility group protein B3 (Fragment) OS=Homo sapiens GN=HMGB3 PE=1 SV=1;tr|E7ES08|E7ES08_HUMAN High mobility group protein B3 (Fragment) OS=Homo sapiens GN=HMGB3 PE=1 SV=1;tr|E7EQU1|E7EQU1_HUMAN High mobility group protein B3 (F	2629800000	983250000	2310000000	658130000	292200000	109250000	256670000	2564500000	2591000000	1915100000	5	5	5	26.8	26.8	26.8	17.522	0	25.8	5923100000	26	4	5	4	5	5	4	5	5	4	5	26.8	26.1	26.8	9	8	9
621	E7EQY1;Q96C01;C9JF51;C9J2Y4	E7EQY1;Q96C01	Protein FAM136A	FAM136A	tr|E7EQY1|E7EQY1_HUMAN Protein FAM136A OS=Homo sapiens GN=FAM136A PE=1 SV=1;sp|Q96C01|F136A_HUMAN Protein FAM136A OS=Homo sapiens GN=FAM136A PE=1 SV=1	1712000000	658470000	1745500000	274400000	114130000	43898000	116370000	1567400000	1636300000	1688200000	8	8	8	36.7	36.7	36.7	26.776	0	115.08	4116000000	27	4	7	6	6	7	6	6	7	6	6	33.5	26.9	29.4	10	8	9
622	E7EQY4;E7EV10;Q9BTC8-2;Q9BTC8;E9PCS8;D6W5A2;E9PF88;H0YIT0	E7EQY4;E7EV10;Q9BTC8-2;Q9BTC8;E9PCS8;D6W5A2	Metastasis-associated protein MTA3	MTA3	tr|E7EQY4|E7EQY4_HUMAN Metastasis-associated protein MTA3 OS=Homo sapiens GN=MTA3 PE=1 SV=1;tr|E7EV10|E7EV10_HUMAN Metastasis-associated protein MTA3 OS=Homo sapiens GN=MTA3 PE=1 SV=1;sp|Q9BTC8-2|MTA3_HUMAN Isoform 2 of Metastasis-associated protein MTA3 O	217780000	35475000	200720000	12610000	6049500	985420	5575400	146450000	157570000	145880000	14	6	6	29.8	15.2	15.2	58.726	0	16.837	453970000	11	8	9	9	11	5	2	5	5	2	5	22.2	18.1	24.5	5	2	4
623	E7EQZ4;Q16637-3;Q16637;Q16637-4;Q16637-2;B4DP61;H0YBZ9	E7EQZ4;Q16637-3;Q16637;Q16637-4;Q16637-2	Survival motor neuron protein	SMN1	tr|E7EQZ4|E7EQZ4_HUMAN Survival motor neuron protein OS=Homo sapiens GN=SMN1 PE=1 SV=1;sp|Q16637-3|SMN_HUMAN Isoform SMN-delta7 of Survival motor neuron protein OS=Homo sapiens GN=SMN1;sp|Q16637|SMN_HUMAN Survival motor neuron protein OS=Homo sapiens GN=SM	587910000	115850000	288360000	124020000	73489000	14482000	36045000	396270000	320840000	236680000	7	7	7	31	31	31	31.689	0	23.791	992130000	18	7	5	3	3	5	3	3	5	3	3	20.4	15.6	15.3	9	4	5
624	Q4W8S1;E7ER26;P57071-6;P57071-5;P57071-3;P57071-2;P57071	Q4W8S1;E7ER26;P57071-6;P57071-5;P57071-3;P57071-2;P57071	PR domain zinc finger protein 15	ZNF298;PRDM15	tr|Q4W8S1|Q4W8S1_HUMAN PR domain zinc finger protein 15 OS=Homo sapiens GN=ZNF298 PE=2 SV=1;tr|E7ER26|E7ER26_HUMAN PR domain zinc finger protein 15 OS=Homo sapiens GN=PRDM15 PE=4 SV=2;sp|P57071-6|PRD15_HUMAN Isoform 5 of PR domain zinc finger protein 15 OS	10739000	0	17423000	1005800	383530	0	622240	8891100	0	15536000	1	1	1	2.1	2.1	2.1	53.663	0.0029046	2.0205	28161000	2	7	1	0	1	1	0	1	1	0	1	2.1	0	2.1	1	0	1
625	E7ERD7;Q9UKU0-2;Q9UKU0-5;Q9UKU0-3;Q9UKU0;Q9UKU0-9;Q9UKU0-6;Q9UKU0-8;Q9UKU0-1;C9J8C7;Q9UKU0-7;C9J4I1;C9JK59;C9J3Z0;C9JT10;C9JPA5	E7ERD7;Q9UKU0-2;Q9UKU0-5;Q9UKU0-3;Q9UKU0;Q9UKU0-9;Q9UKU0-6;Q9UKU0-8;Q9UKU0-1;C9J8C7;Q9UKU0-7	Long-chain-fatty-acid--CoA ligase 6	ACSL6	tr|E7ERD7|E7ERD7_HUMAN Long-chain-fatty-acid--CoA ligase 6 OS=Homo sapiens GN=ACSL6 PE=4 SV=1;sp|Q9UKU0-2|ACSL6_HUMAN Isoform 2 of Long-chain-fatty-acid--CoA ligase 6 OS=Homo sapiens GN=ACSL6;sp|Q9UKU0-5|ACSL6_HUMAN Isoform 5 of Long-chain-fatty-acid--CoA	130370000	0	35429000	4145100	3259400	0	885730	72289000	0	69874000	7	5	5	11.8	9.3	9.3	75.246	0	14.403	165800000	7	16	7	1	3	5	0	2	5	0	2	11.8	1.3	5.3	5	0	2
626	E7ERK9;Q9UI10;A0A087WW69;F8W8L6	E7ERK9;Q9UI10;A0A087WW69	Translation initiation factor eIF-2B subunit delta	EIF2B4	tr|E7ERK9|E7ERK9_HUMAN Translation initiation factor eIF-2B subunit delta OS=Homo sapiens GN=EIF2B4 PE=1 SV=1;sp|Q9UI10|EI2BD_HUMAN Translation initiation factor eIF-2B subunit delta OS=Homo sapiens GN=EIF2B4 PE=1 SV=2;tr|A0A087WW69|A0A087WW69_HUMAN Transl	866290000	415640000	948450000	79656000	30939000	14844000	33873000	825770000	1009400000	802520000	13	13	1	37.5	37.5	3.9	59.714	0	51.051	2230400000	41	4	10	12	11	10	12	11	1	1	1	30.3	33.6	31.4	12	12	17
627	E7ERS3;Q86VM9;Q86VM9-2;H3BPD0;H3BP01;H3BRN6;H3BRH3	E7ERS3;Q86VM9;Q86VM9-2	Zinc finger CCCH domain-containing protein 18	ZC3H18	tr|E7ERS3|E7ERS3_HUMAN Zinc finger CCCH domain-containing protein 18 OS=Homo sapiens GN=ZC3H18 PE=1 SV=1;sp|Q86VM9|ZCH18_HUMAN Zinc finger CCCH domain-containing protein 18 OS=Homo sapiens GN=ZC3H18 PE=1 SV=2;sp|Q86VM9-2|ZCH18_HUMAN Isoform 2 of Zinc finge	983220000	536360000	721470000	43942000	19279000	10517000	14147000	802660000	1276300000	649660000	15	15	15	23.2	23.2	23.2	108.94	0	38.049	2241100000	35	7	8	10	6	8	10	6	8	10	6	13	14.9	11.9	12	13	10
628	E7ERW8;H9KV28;E9PHQ0;E9PEZ3;O60610-2;O60610-3;O60610;E7EMV0;B4E2I7	E7ERW8;H9KV28;E9PHQ0;E9PEZ3;O60610-2;O60610-3;O60610;E7EMV0	Protein diaphanous homolog 1	DIAPH1	tr|E7ERW8|E7ERW8_HUMAN Protein diaphanous homolog 1 OS=Homo sapiens GN=DIAPH1 PE=1 SV=1;tr|H9KV28|H9KV28_HUMAN Protein diaphanous homolog 1 OS=Homo sapiens GN=DIAPH1 PE=1 SV=2;tr|E9PHQ0|E9PHQ0_HUMAN Protein diaphanous homolog 1 OS=Homo sapiens GN=DIAPH1 PE	748090000	65188000	267440000	16130000	11166000	972950	3991600	533780000	271850000	209120000	12	12	12	14.6	14.6	14.6	135.35	0	40.035	1080700000	29	9	9	3	6	9	3	6	9	3	6	10.2	3.9	7.7	12	7	10
629	E7ES00;Q9Y2T1	E7ES00;Q9Y2T1	Axin-2	AXIN2	tr|E7ES00|E7ES00_HUMAN Axin-2 OS=Homo sapiens GN=AXIN2 PE=4 SV=2;sp|Q9Y2T1|AXIN2_HUMAN Axin-2 OS=Homo sapiens GN=AXIN2 PE=1 SV=1	9522100	0	12797000	637700	272060	0	365640	7746900	0	13268000	1	1	1	1.4	1.4	1.4	86.68	0.00050243	2.6281	22320000	3	2	1	0	1	1	0	1	1	0	1	1.4	0	1.4	1	0	2
630	E7ES96;P49768-2;P49768;P49768-3;P49768-5;P49768-6;P49768-7;G3V3Z0;G3V499;G3V2G7;P49768-4;E5RFW4;E5RG63;B1AP22;P49810-3;P49810	E7ES96;P49768-2;P49768;P49768-3;P49768-5;P49768-6;P49768-7;G3V3Z0;G3V499;G3V2G7;P49768-4	Presenilin;Presenilin-1;Presenilin-1 NTF subunit;Presenilin-1 CTF subunit;Presenilin-1 CTF12	PSEN1	tr|E7ES96|E7ES96_HUMAN Presenilin OS=Homo sapiens GN=PSEN1 PE=1 SV=1;sp|P49768-2|PSN1_HUMAN Isoform 2 of Presenilin-1 OS=Homo sapiens GN=PSEN1;sp|P49768|PSN1_HUMAN Presenilin-1 OS=Homo sapiens GN=PSEN1 PE=1 SV=1;sp|P49768-3|PSN1_HUMAN Isoform 3 of Presenil	298500000	159230000	139920000	37353000	18656000	9952200	8744800	205970000	385290000	256510000	4	4	4	12.8	12.8	12.8	42.082	0	23.352	597650000	11	16	3	3	2	3	3	2	3	3	2	12.8	12.5	10.4	4	6	1
631	H0YBP1;E7ESA6;Q05397-2;Q8IYN9;Q05397;Q05397-5;B4DWJ1;E9PEI4;H0YB16;H0YBZ1;Q05397-6;H0YB99;Q05397-4;Q05397-3;E5RHD8;E5RI03;E5RJQ2;E5RG80	H0YBP1;E7ESA6;Q05397-2;Q8IYN9;Q05397;Q05397-5;B4DWJ1;E9PEI4;H0YB16;H0YBZ1;Q05397-6	Focal adhesion kinase 1	PTK2	tr|H0YBP1|H0YBP1_HUMAN Focal adhesion kinase 1 (Fragment) OS=Homo sapiens GN=PTK2 PE=1 SV=1;tr|E7ESA6|E7ESA6_HUMAN Focal adhesion kinase 1 OS=Homo sapiens GN=PTK2 PE=1 SV=1;sp|Q05397-2|FAK1_HUMAN Isoform 2 of Focal adhesion kinase 1 OS=Homo sapiens GN=PTK2	163410000	0	46238000	2995000	2334400	0	660550	124340000	0	43153000	7	7	7	10.4	10.4	10.4	115.45	0	9.9569	209650000	10	18	7	0	2	7	0	2	7	0	2	10.4	0	3.2	7	0	3
632	E7ESI2;G3V5T9;P24941-2;P24941	E7ESI2;G3V5T9;P24941-2;P24941	Cyclin-dependent kinase 2	CDK2	tr|E7ESI2|E7ESI2_HUMAN Cyclin-dependent kinase 2 OS=Homo sapiens GN=CDK2 PE=1 SV=1;tr|G3V5T9|G3V5T9_HUMAN Cyclin-dependent kinase 2 OS=Homo sapiens GN=CDK2 PE=1 SV=1;sp|P24941-2|CDK2_HUMAN Isoform 2 of Cyclin-dependent kinase 2 OS=Homo sapiens GN=CDK2;sp|P	20497000	0	13555000	2003000	1205700	0	797350	0	0	14431000	4	2	2	20.6	12.6	12.6	27.164	0.0043207	1.8634	34052000	1	4	3	1	2	1	0	1	1	0	1	13.9	3.4	10.1	1	0	0
633	E7ESK6;E9PBI9;P34741;E5RJB8;E5RHU3	E7ESK6;E9PBI9;P34741;E5RJB8;E5RHU3	Syndecan;Syndecan-2	SDC2	tr|E7ESK6|E7ESK6_HUMAN Syndecan OS=Homo sapiens GN=SDC2 PE=1 SV=1;tr|E9PBI9|E9PBI9_HUMAN Syndecan OS=Homo sapiens GN=SDC2 PE=1 SV=1;sp|P34741|SDC2_HUMAN Syndecan-2 OS=Homo sapiens GN=SDC2 PE=1 SV=2;tr|E5RJB8|E5RJB8_HUMAN Syndecan-2 (Fragment) OS=Homo sapie	297780000	348000000	288830000	77884000	24815000	29000000	24069000	394260000	573710000	410080000	3	3	3	20	20	20	18.388	0	19.562	934610000	8	5	1	3	1	1	3	1	1	3	1	9.1	20	9.1	2	4	2
634	E7ESL0;J3KQY1;Q9NWU5;Q9NWU5-3;Q9NWU5-2	E7ESL0;J3KQY1;Q9NWU5;Q9NWU5-3;Q9NWU5-2	39S ribosomal protein L22, mitochondrial	MRPL22	tr|E7ESL0|E7ESL0_HUMAN 39S ribosomal protein L22, mitochondrial OS=Homo sapiens GN=MRPL22 PE=1 SV=1;tr|J3KQY1|J3KQY1_HUMAN 39S ribosomal protein L22, mitochondrial OS=Homo sapiens GN=MRPL22 PE=1 SV=1;sp|Q9NWU5|RM22_HUMAN 39S ribosomal protein L22, mitochon	5214200000	1427800000	4616200000	750550000	347620000	95186000	307740000	4268300000	3649300000	4304100000	12	12	12	48.1	48.1	48.1	24.325	0	68.116	11258000000	69	5	11	7	12	11	7	12	11	7	12	45.3	38.2	48.1	27	19	23
635	E7ESM9;P20810-9;P20810-5;P20810-10;P20810-7;P20810-6;E7ES10;E9PCH5;E7EVY3;B7Z574;P20810-4;P20810-8;P20810-2;P20810;P20810-3;F8W7E0;H0Y9H6;E9PDE4;E7EQ12;H0Y7F0;E9PSG1;E7EQA0;H0YD33;H0Y944;H0YA91;D6RAA8;D6RC54;E7EQK6	E7ESM9;P20810-9;P20810-5;P20810-10;P20810-7;P20810-6;E7ES10;E9PCH5;E7EVY3;B7Z574;P20810-4;P20810-8;P20810-2;P20810;P20810-3;F8W7E0;H0Y9H6;E9PDE4;E7EQ12;H0Y7F0	Calpastatin	CAST	tr|E7ESM9|E7ESM9_HUMAN Calpastatin OS=Homo sapiens GN=CAST PE=1 SV=1;sp|P20810-9|ICAL_HUMAN Isoform 9 of Calpastatin OS=Homo sapiens GN=CAST;sp|P20810-5|ICAL_HUMAN Isoform 5 of Calpastatin OS=Homo sapiens GN=CAST;sp|P20810-10|ICAL_HUMAN Isoform 10 of Calpa	256670000	53122000	166290000	11335000	6111300	1264800	3959200	221180000	127940000	168140000	8	8	8	19.2	19.2	19.2	82.436	0	21.382	476080000	16	28	7	2	3	7	2	3	7	2	3	18.1	4.3	9	8	3	5
636	E7ESP4;E7EMF1;E9PB77;D6RG08	E7ESP4;E7EMF1;E9PB77		ITGA2	tr|E7ESP4|E7ESP4_HUMAN Integrin alpha-2 OS=Homo sapiens GN=ITGA2 PE=1 SV=1;tr|E7EMF1|E7EMF1_HUMAN Integrin alpha-2 OS=Homo sapiens GN=ITGA2 PE=1 SV=1;tr|E9PB77|E9PB77_HUMAN Integrin alpha-2 OS=Homo sapiens GN=ITGA2 PE=1 SV=1	909920000	343450000	923960000	54433000	22748000	8586300	23099000	672650000	835520000	930390000	30	1	1	40.8	2.1	2.1	102.83	0	58.496	2177300000	9	4	30	26	25	1	1	1	1	1	1	40.8	36.5	35.6	3	3	3
637	E7ESY4;Q13330-3;Q13330;Q13330-2;F8VSM3;H0Y4T7;H7C3F3;F8W9Y9;F8VPC5;C9JJM0;H0YIV8	E7ESY4;Q13330-3;Q13330;Q13330-2;F8VSM3;H0Y4T7	Metastasis-associated protein MTA1	MTA1	tr|E7ESY4|E7ESY4_HUMAN Metastasis-associated protein MTA1 OS=Homo sapiens GN=MTA1 PE=1 SV=1;sp|Q13330-3|MTA1_HUMAN Isoform 3 of Metastasis-associated protein MTA1 OS=Homo sapiens GN=MTA1;sp|Q13330|MTA1_HUMAN Metastasis-associated protein MTA1 OS=Homo sapie	329510000	240640000	442640000	19858000	6460900	4718400	8679100	401980000	449530000	453890000	16	12	9	25.2	20.2	15.5	79.372	0	20.498	1012800000	20	11	8	12	9	6	8	6	5	6	4	14.1	19.8	15.4	4	9	7
638	E7ET49;Q8NCG7;Q8NCG7-2;Q8NCG7-4;Q8NCG7-3;C9JA85	E7ET49;Q8NCG7;Q8NCG7-2;Q8NCG7-4	Sn1-specific diacylglycerol lipase beta	DAGLB	tr|E7ET49|E7ET49_HUMAN Sn1-specific diacylglycerol lipase beta OS=Homo sapiens GN=DAGLB PE=1 SV=1;sp|Q8NCG7|DGLB_HUMAN Sn1-specific diacylglycerol lipase beta OS=Homo sapiens GN=DAGLB PE=1 SV=2;sp|Q8NCG7-2|DGLB_HUMAN Isoform 2 of Sn1-specific diacylglycero	412770000	214330000	452200000	37217000	14233000	7390600	15593000	415480000	416380000	456880000	14	14	14	30.7	30.7	30.7	68.951	0	28.131	1079300000	27	6	9	8	7	9	8	7	9	8	7	16.8	19.8	17.3	10	7	10
639	E7ET55;F5H748;P35670-2;P35670-4;P35670;P35670-3;F5H562;Q04656-4	E7ET55;F5H748;P35670-2;P35670-4;P35670;P35670-3;F5H562	Copper-transporting ATPase 2;WND/140 kDa	ATP7B	tr|E7ET55|E7ET55_HUMAN WND/140 kDa OS=Homo sapiens GN=ATP7B PE=3 SV=2;tr|F5H748|F5H748_HUMAN WND/140 kDa OS=Homo sapiens GN=ATP7B PE=3 SV=1;sp|P35670-2|ATP7B_HUMAN Isoform 2 of Copper-transporting ATPase 2 OS=Homo sapiens GN=ATP7B;sp|P35670-4|ATP7B_HUMAN I	473260000	77139000	153640000	10508000	7063600	1151300	2293200	290910000	193310000	196760000	13	13	12	13.1	13.1	12.4	148.4	0	22.746	704050000	20	8	12	4	5	12	4	5	11	3	5	13	2.7	4.8	11	4	5
640	E7ET85;O43909	E7ET85;O43909	Exostosin-like 3	EXTL3	tr|E7ET85|E7ET85_HUMAN Exostosin-like 3 OS=Homo sapiens GN=EXTL3 PE=4 SV=1;sp|O43909|EXTL3_HUMAN Exostosin-like 3 OS=Homo sapiens GN=EXTL3 PE=1 SV=1	20596000	0	22377000	1432400	686530	0	745900	14788000	0	18440000	1	1	1	3.6	3.6	3.6	61.101	0	4.1952	42973000	2	2	1	0	1	1	0	1	1	0	1	3.6	0	3.6	1	0	1
641	E7ETA6;E7EV93;E9PGW9;Q15154-3;E5RGQ4	E7ETA6		PCM1	tr|E7ETA6|E7ETA6_HUMAN Pericentriolar material 1 protein OS=Homo sapiens GN=PCM1 PE=1 SV=1	4799600000	1746800000	5000500000	115470000	47996000	17468000	50005000	4286200000	4540600000	4364400000	55	55	1	35	35	0.9	227.73	0	323.31	11547000000	157	5	43	28	34	43	28	34	1	1	1	27.6	20.6	24.3	64	37	56
642	E7ETB3;Q9ULA0;E7EMB6;C9JBE1;F8WAN0;B9ZVU2;E7EPX3;E5RJ35;C9J1E2;C9JRG3	E7ETB3;Q9ULA0;E7EMB6;C9JBE1	Aspartyl aminopeptidase	DNPEP	tr|E7ETB3|E7ETB3_HUMAN Aspartyl aminopeptidase OS=Homo sapiens GN=DNPEP PE=1 SV=2;sp|Q9ULA0|DNPEP_HUMAN Aspartyl aminopeptidase OS=Homo sapiens GN=DNPEP PE=1 SV=1;tr|E7EMB6|E7EMB6_HUMAN Aspartyl aminopeptidase OS=Homo sapiens GN=DNPEP PE=1 SV=2;tr|C9JBE1|C	1774900000	175030000	1157000000	129460000	73953000	7292700	48210000	1460900000	328730000	1083400000	16	16	16	43.4	43.4	43.4	54.502	0	80.176	3106900000	43	10	15	4	14	15	4	14	15	4	14	40.2	12.2	40.2	21	4	18
643	G3XAM2;E7ETH0;P05156;A0A087X0I2;D6R9Z8;CON__Q32PI4	G3XAM2;E7ETH0;P05156;A0A087X0I2	Complement factor I;Complement factor I heavy chain;Complement factor I light chain	CFI	tr|G3XAM2|G3XAM2_HUMAN Complement factor I light chain OS=Homo sapiens GN=CFI PE=3 SV=1;tr|E7ETH0|E7ETH0_HUMAN Complement factor I light chain OS=Homo sapiens GN=CFI PE=3 SV=1;sp|P05156|CFAI_HUMAN Complement factor I OS=Homo sapiens GN=CFI PE=1 SV=2;tr|A0A	918900000	101200000	762080000	48167000	24835000	2735200	20597000	622090000	489600000	685400000	12	12	12	28.3	28.3	28.3	65.059	0	37.488	1782200000	35	6	9	5	10	9	5	10	9	5	10	22.2	10.4	22.2	14	6	15
644	F2Z2A3;H3BUS1;Q5QPU8;E7ETM6;Q8N2H4-2;Q8N2H4	F2Z2A3;H3BUS1;Q5QPU8;E7ETM6;Q8N2H4-2;Q8N2H4	Protein SYS1 homolog	SYS1-DBNDD2;SYS1	tr|F2Z2A3|F2Z2A3_HUMAN Protein SYS1-DBNDD2 OS=Homo sapiens GN=SYS1-DBNDD2 PE=4 SV=1;tr|H3BUS1|H3BUS1_HUMAN Protein SYS1-DBNDD2 OS=Homo sapiens GN=SYS1-DBNDD2 PE=4 SV=1;tr|Q5QPU8|Q5QPU8_HUMAN Protein SYS1 homolog (Fragment) OS=Homo sapiens GN=SYS1 PE=4 SV=1	428020000	91047000	360740000	293270000	142670000	30349000	120250000	254960000	309890000	263770000	1	1	1	28.2	28.2	28.2	8.7171	0	19.289	879810000	11	6	1	1	1	1	1	1	1	1	1	28.2	28.2	28.2	4	2	5
645	E7ETU5;F6Y5H0;P29558-2;P29558;E7EPF2;F8W1T6;Q15434	E7ETU5;F6Y5H0;P29558-2;P29558;E7EPF2;F8W1T6;Q15434	RNA-binding motif, single-stranded-interacting protein 1;RNA-binding motif, single-stranded-interacting protein 2	RBMS1;RBMS2	tr|E7ETU5|E7ETU5_HUMAN RNA-binding motif, single-stranded-interacting protein 1 OS=Homo sapiens GN=RBMS1 PE=1 SV=1;tr|F6Y5H0|F6Y5H0_HUMAN RNA-binding motif, single-stranded-interacting protein 1 OS=Homo sapiens GN=RBMS1 PE=1 SV=1;sp|P29558-2|RBMS1_HUMAN Is	172530000	0	126510000	18690000	10783000	0	7906700	113740000	0	133560000	2	2	2	6.8	6.8	6.8	40.147	0	5.0772	299040000	6	7	2	0	2	2	0	2	2	0	2	6.8	0	6.8	4	0	2
646	H0Y9G6;E7ETU7;P09001;E9PF06;D6RC14;D6RBQ5	H0Y9G6;E7ETU7;P09001;E9PF06;D6RC14	39S ribosomal protein L3, mitochondrial	MRPL3	tr|H0Y9G6|H0Y9G6_HUMAN 39S ribosomal protein L3, mitochondrial (Fragment) OS=Homo sapiens GN=MRPL3 PE=1 SV=1;tr|E7ETU7|E7ETU7_HUMAN 39S ribosomal protein L3, mitochondrial OS=Homo sapiens GN=MRPL3 PE=1 SV=1;sp|P09001|RM03_HUMAN 39S ribosomal protein L3, mi	4242900000	1538900000	4122200000	412660000	176790000	64121000	171760000	3596500000	3905000000	3814300000	16	16	16	43.8	43.8	43.8	40.47	0	68.415	9903900000	73	6	16	9	13	16	9	13	16	9	13	43.8	30.9	41.9	28	15	30
647	E7ETU9;O00469-2;O00469-3;C9JXZ0	E7ETU9;O00469-2;O00469-3	Procollagen-lysine,2-oxoglutarate 5-dioxygenase 2	PLOD2	tr|E7ETU9|E7ETU9_HUMAN Procollagen-lysine,2-oxoglutarate 5-dioxygenase 2 OS=Homo sapiens GN=PLOD2 PE=1 SV=1;sp|O00469-2|PLOD2_HUMAN Isoform 2 of Procollagen-lysine,2-oxoglutarate 5-dioxygenase 2 OS=Homo sapiens GN=PLOD2;sp|O00469-3|PLOD2_HUMAN Isoform 3 of	8404300000	3349000000	7907800000	491530000	210110000	83726000	197700000	8015200000	7630400000	8083800000	30	30	2	52.6	52.6	3.7	81.169	0	211.7	19661000000	138	4	23	22	26	23	22	26	2	0	2	40	38.4	46.7	39	47	52
648	E7ETZ4;Q9Y6E2;Q75MG1;B5MCH7;C9JF98;E7EMS9;Q9Y6E2-2;B5MCE7;E9PFE3;F8WDX8;E9PFD4	E7ETZ4;Q9Y6E2;Q75MG1;B5MCH7;C9JF98;E7EMS9;Q9Y6E2-2	Basic leucine zipper and W2 domain-containing protein 2	BZW2	tr|E7ETZ4|E7ETZ4_HUMAN Basic leucine zipper and W2 domain-containing protein 2 (Fragment) OS=Homo sapiens GN=BZW2 PE=1 SV=1;sp|Q9Y6E2|BZW2_HUMAN Basic leucine zipper and W2 domain-containing protein 2 OS=Homo sapiens GN=BZW2 PE=1 SV=1;tr|Q75MG1|Q75MG1_HUMA	203470000	83502000	256830000	17542000	6563600	2693600	8284800	269950000	163350000	246640000	11	9	9	26	22.8	22.8	46.913	0	21.565	543800000	11	11	6	5	7	4	4	5	4	4	5	17.4	8.8	15.9	4	3	4
649	E7EU05;P16671;P16671-4;P16671-3;E9PLT1;P16671-2;E7EX47;E9PJX8;E9PC45;E7EVU1;E7ERZ9;E7EWI4	E7EU05;P16671;P16671-4;P16671-3;E9PLT1	Platelet glycoprotein 4	CD36	tr|E7EU05|E7EU05_HUMAN Platelet glycoprotein 4 (Fragment) OS=Homo sapiens GN=CD36 PE=4 SV=2;sp|P16671|CD36_HUMAN Platelet glycoprotein 4 OS=Homo sapiens GN=CD36 PE=1 SV=2;sp|P16671-4|CD36_HUMAN Isoform 4 of Platelet glycoprotein 4 OS=Homo sapiens GN=CD36;s	912130000	383780000	1279800000	128780000	45607000	19189000	63988000	785390000	1006000000	1252700000	11	11	11	30.5	30.5	30.5	52.062	0	72.311	2575700000	39	12	9	5	9	9	5	9	9	5	9	19.4	15.6	28.7	12	8	19
650	E7EU96;Q5U5J2;P68400;Q8NEV1;P68400-2;V9GYA2;V9GY80;A0A087WY74;V9GYW6	E7EU96;Q5U5J2;P68400;Q8NEV1;P68400-2	Casein kinase II subunit alpha;Casein kinase II subunit alpha 3	CSNK2A1;CSNK2A3	tr|E7EU96|E7EU96_HUMAN Casein kinase II subunit alpha OS=Homo sapiens GN=CSNK2A1 PE=1 SV=1;tr|Q5U5J2|Q5U5J2_HUMAN CSNK2A1 protein OS=Homo sapiens GN=CSNK2A1 PE=1 SV=1;sp|P68400|CSK21_HUMAN Casein kinase II subunit alpha OS=Homo sapiens GN=CSNK2A1 PE=1 SV=1	2919000000	1048200000	3124900000	322370000	132680000	47645000	142040000	2373500000	2876600000	2708400000	17	17	16	55.8	55.8	54.3	45.31	0	104.68	7092100000	82	9	16	9	12	16	9	12	15	9	11	55.6	33.2	39	31	21	30
651	E7EUJ1;P11150;E7EUK6	E7EUJ1;P11150;E7EUK6	Hepatic triacylglycerol lipase	LIPC	tr|E7EUJ1|E7EUJ1_HUMAN Hepatic triacylglycerol lipase OS=Homo sapiens GN=LIPC PE=3 SV=1;sp|P11150|LIPC_HUMAN Hepatic triacylglycerol lipase OS=Homo sapiens GN=LIPC PE=1 SV=3;tr|E7EUK6|E7EUK6_HUMAN Hepatic triacylglycerol lipase OS=Homo sapiens GN=LIPC PE=3	101490000	8329600	33408000	5508700	3903400	320370	1284900	53079000	0	47582000	6	6	6	15.6	15.6	15.6	55.616	0	17.897	143230000	7	3	4	1	3	4	1	3	4	1	3	9.8	2.8	10.2	4	0	3
652	E7EUM2;P38398-6;P38398-5;P38398-3;P38398-4;P38398;P38398-7;E7ENB7;E7EQW4;Q3B891;B7ZA85;E9PH68;E7EWN5;Q5YLB2;E9PFZ0;E9PC22;K7EPC7;H0Y8B8;P38398-2	E7EUM2;P38398-6;P38398-5;P38398-3;P38398-4;P38398;P38398-7;E7ENB7;E7EQW4;Q3B891;B7ZA85;E9PH68;E7EWN5;Q5YLB2;E9PFZ0	Breast cancer type 1 susceptibility protein	BRCA1	tr|E7EUM2|E7EUM2_HUMAN Breast cancer type 1 susceptibility protein (Fragment) OS=Homo sapiens GN=BRCA1 PE=1 SV=1;sp|P38398-6|BRCA1_HUMAN Isoform 6 of Breast cancer type 1 susceptibility protein OS=Homo sapiens GN=BRCA1;sp|P38398-5|BRCA1_HUMAN Isoform 5 of	65183000	0	0	1810600	1810600	0	0	46496000	0	0	3	3	3	6.4	6.4	6.4	69.517	0.0019481	2.1277	65183000	1	19	3	0	0	3	0	0	3	0	0	6.4	0	0	1	0	0
653	E7EUN9;Q9NX74;J3QLD5;I3L4Y9	E7EUN9;Q9NX74	tRNA-dihydrouridine(20) synthase [NAD(P)+]-like	DUS2	tr|E7EUN9|E7EUN9_HUMAN tRNA-dihydrouridine(20) synthase [NAD(P)+]-like OS=Homo sapiens GN=DUS2 PE=1 SV=1;sp|Q9NX74|DUS2L_HUMAN tRNA-dihydrouridine(20) synthase [NAD(P)+]-like OS=Homo sapiens GN=DUS2 PE=1 SV=1	151590000	25809000	217800000	12748000	4890100	832530	7025800	168680000	75445000	147220000	5	5	5	11.1	11.1	11.1	51.388	0.00018142	4.0793	395200000	7	4	3	1	4	3	1	4	3	1	4	7.9	2.8	9.4	2	1	4
654	E7EVA0;P27816;P27816-6;P27816-2;P27816-5;P27816-4;H7C4C5;H0Y2V1;B5MEG9;F8W9U4;P27816-7;H7C456	E7EVA0;P27816;P27816-6;P27816-2	Microtubule-associated protein;Microtubule-associated protein 4	MAP4	tr|E7EVA0|E7EVA0_HUMAN Microtubule-associated protein OS=Homo sapiens GN=MAP4 PE=1 SV=1;sp|P27816|MAP4_HUMAN Microtubule-associated protein 4 OS=Homo sapiens GN=MAP4 PE=1 SV=3;sp|P27816-6|MAP4_HUMAN Isoform 6 of Microtubule-associated protein 4 OS=Homo sap	6192700000	5922400000	4750400000	119610000	43920000	42003000	33691000	9475200000	7364200000	9456700000	32	32	32	21	21	21	245.44	0	143.11	16865000000	95	12	27	16	20	27	16	20	27	16	20	18.4	11.2	14.3	40	22	33
655	E7EVB6;O60941-7;O60941;E9PEY4;O60941-6;O60941-3;O60941-4;O60941-5;O60941-2;F8W9U0;E7ES64;Q9Y4J8-12;E9PE76;F8WD22;M0R0C4	E7EVB6;O60941-7;O60941;E9PEY4;O60941-6;O60941-3;O60941-4;O60941-5;O60941-2	Dystrobrevin;Dystrobrevin beta	DTNB	tr|E7EVB6|E7EVB6_HUMAN Dystrobrevin OS=Homo sapiens GN=DTNB PE=1 SV=3;sp|O60941-7|DTNB_HUMAN Isoform 7 of Dystrobrevin beta OS=Homo sapiens GN=DTNB;sp|O60941|DTNB_HUMAN Dystrobrevin beta OS=Homo sapiens GN=DTNB PE=1 SV=1;tr|E9PEY4|E9PEY4_HUMAN Dystrobrevin	501340000	104430000	519870000	27455000	12228000	2547100	12680000	431100000	353060000	360500000	14	14	10	33.1	33.1	25.3	70.512	0	48.854	1125600000	27	15	9	6	10	9	6	10	8	4	7	23.1	15.6	25.6	11	6	10
656	E7EVH7;G3V2E7;F8W6L3;G3V3H3;G3V5R9;Q07866-8;Q07866-2;Q07866-3;Q07866;Q07866-7;Q07866-5;Q07866-10;Q07866-6;Q07866-4;Q07866-9;G5E9S8;H0YJU9;H0YJL0;G3V2P7;H0YJT3;H0YG16;H0YGB8;H0YJK3;H7C2Z1;G3V4L6;K7EL76;Q96IL0;Q6P597-2;Q6P597;Q6P597-3	E7EVH7;G3V2E7;F8W6L3;G3V3H3;G3V5R9;Q07866-8;Q07866-2;Q07866-3;Q07866;Q07866-7;Q07866-5;Q07866-10;Q07866-6;Q07866-4;Q07866-9;G5E9S8	Kinesin light chain 1	KLC1	tr|E7EVH7|E7EVH7_HUMAN Kinesin light chain 1 OS=Homo sapiens GN=KLC1 PE=4 SV=1;tr|G3V2E7|G3V2E7_HUMAN Kinesin light chain 1 OS=Homo sapiens GN=KLC1 PE=4 SV=1;tr|F8W6L3|F8W6L3_HUMAN Kinesin light chain 1 OS=Homo sapiens GN=KLC1 PE=4 SV=1;tr|G3V3H3|G3V3H3_HU	597050000	261310000	312890000	24401000	12438000	5444000	6518500	358660000	680260000	360230000	15	15	8	26.9	26.9	14.3	83.694	0	76.1	1171200000	29	30	13	6	6	13	6	6	7	3	1	23.6	10	10.2	17	5	7
657	E7EVJ5;Q96F07-2;Q96F07;H7C229;E7EW33;A0A087WVE1;A0A087WTQ3;A0A087WWZ1;A0A087WU52;A0A087WWL1;A0A087WV63;A0A087WWY5;A0A087WZL7;A0A087X0D6	E7EVJ5;Q96F07-2;Q96F07;H7C229;E7EW33	Cytoplasmic FMR1-interacting protein 2	CYFIP2	tr|E7EVJ5|E7EVJ5_HUMAN Cytoplasmic FMR1-interacting protein 2 OS=Homo sapiens GN=CYFIP2 PE=1 SV=1;sp|Q96F07-2|CYFP2_HUMAN Isoform 2 of Cytoplasmic FMR1-interacting protein 2 OS=Homo sapiens GN=CYFIP2;sp|Q96F07|CYFP2_HUMAN Cytoplasmic FMR1-interacting prote	97451000	13808000	133600000	3264700	1299300	184110	1781300	75269000	55865000	89259000	22	6	6	22	5.8	5.8	142.58	0	8.8331	244850000	13	14	18	9	15	4	2	5	4	2	5	18.1	8	14.4	5	2	6
658	H0YBX1;E7EW18;P06746;H0YAV8;H0YBJ0	H0YBX1;E7EW18;P06746	DNA polymerase beta	POLB	tr|H0YBX1|H0YBX1_HUMAN DNA polymerase beta (Fragment) OS=Homo sapiens GN=POLB PE=4 SV=1;tr|E7EW18|E7EW18_HUMAN DNA polymerase beta (Fragment) OS=Homo sapiens GN=POLB PE=4 SV=1;sp|P06746|DPOLB_HUMAN DNA polymerase beta OS=Homo sapiens GN=POLB PE=1 SV=3	23943000	0	62925000	5791200	1596200	0	4195000	25448000	0	60588000	3	3	3	18.4	18.4	18.4	27.02	0	4.5829	86868000	5	5	1	0	3	1	0	3	1	0	3	9.6	0	18.4	1	0	4
659	E7EW32;Q7L1V2-2;Q7L1V2	E7EW32;Q7L1V2-2;Q7L1V2	Vacuolar fusion protein MON1 homolog B	MON1B	tr|E7EW32|E7EW32_HUMAN Vacuolar fusion protein MON1 homolog B OS=Homo sapiens GN=MON1B PE=1 SV=1;sp|Q7L1V2-2|MON1B_HUMAN Isoform 2 of Vacuolar fusion protein MON1 homolog B OS=Homo sapiens GN=MON1B;sp|Q7L1V2|MON1B_HUMAN Vacuolar fusion protein MON1 homolog	60330000	0	21037000	3013600	2234400	0	779160	35380000	0	27419000	3	3	3	13.9	13.9	13.9	47.836	0	8.6757	81367000	4	3	3	0	1	3	0	1	3	0	1	13.9	0	3.7	3	0	1
660	E7EWD6;Q76L83-2;Q76L83	E7EWD6;Q76L83-2;Q76L83	Putative Polycomb group protein ASXL2	ASXL2	tr|E7EWD6|E7EWD6_HUMAN Putative Polycomb group protein ASXL2 OS=Homo sapiens GN=ASXL2 PE=1 SV=1;sp|Q76L83-2|ASXL2_HUMAN Isoform 2 of Putative Polycomb group protein ASXL2 OS=Homo sapiens GN=ASXL2;sp|Q76L83|ASXL2_HUMAN Putative Polycomb group protein ASXL2	19152000	0	0	245530	245530	0	0	11017000	0	0	1	1	1	0.7	0.7	0.7	150.46	0.00082386	2.3738	19152000	1	3	1	0	0	1	0	0	1	0	0	0.7	0	0	1	0	0
661	E7EWM1	E7EWM1		NCOA2	tr|E7EWM1|E7EWM1_HUMAN Nuclear receptor coactivator 2 OS=Homo sapiens GN=NCOA2 PE=1 SV=2	2207300000	0	713160000	58409000	44146000	0	14263000	1194400000	0	737770000	1	1	1	1.3	1.3	1.3	102.73	0.0070677	1.6001	2920400000	4	1	1	1	1	1	1	1	1	1	1	1.3	1.3	1.3	2	1	1
662	E7EWP3;P25189;P25189-2	E7EWP3;P25189;P25189-2	Myelin protein P0	MPZ	tr|E7EWP3|E7EWP3_HUMAN Myelin protein P0 OS=Homo sapiens GN=MPZ PE=4 SV=1;sp|P25189|MYP0_HUMAN Myelin protein P0 OS=Homo sapiens GN=MPZ PE=1 SV=1;sp|P25189-2|MYP0_HUMAN Isoform L-MPZ of Myelin protein P0 OS=Homo sapiens GN=MPZ	6074100	45289000	43779000	6795800	433860	3234900	3127000	40711000	80024000	41470000	2	2	2	8.8	8.8	8.8	27.879	0.00034106	2.8708	95141000	5	3	1	2	2	1	2	2	1	2	2	4	8.8	8.8	1	2	2
663	E7EWV1;Q5H8A4-2;Q5H8A4;E7EM50;D6RFE8;Q5H8A4-4;Q5H8A4-6;Q5H8A4-3;Q5H8A4-5;D6R9J9	E7EWV1;Q5H8A4-2;Q5H8A4;E7EM50;D6RFE8;Q5H8A4-4;Q5H8A4-6;Q5H8A4-3;Q5H8A4-5	GPI ethanolamine phosphate transferase 2	PIGG	tr|E7EWV1|E7EWV1_HUMAN GPI ethanolamine phosphate transferase 2 OS=Homo sapiens GN=PIGG PE=4 SV=1;sp|Q5H8A4-2|PIGG_HUMAN Isoform 2 of GPI ethanolamine phosphate transferase 2 OS=Homo sapiens GN=PIGG;sp|Q5H8A4|PIGG_HUMAN GPI ethanolamine phosphate transfera	646910000	130440000	634040000	40325000	18483000	3726800	18116000	528390000	382480000	593310000	9	9	9	18.1	18.1	18.1	98.842	0	33.617	1411400000	22	10	7	5	7	7	5	7	7	5	7	11	8.2	15.7	8	4	10
664	E7EX17;P23588;B4DS13;F8VX11;F8W0K0;F8VRU1;F8VYE9;F8VSC7;F8VP89	E7EX17;P23588;B4DS13;F8VX11;F8W0K0;F8VRU1;F8VYE9;F8VSC7;F8VP89	Eukaryotic translation initiation factor 4B	EIF4B	tr|E7EX17|E7EX17_HUMAN Eukaryotic translation initiation factor 4B OS=Homo sapiens GN=EIF4B PE=1 SV=1;sp|P23588|IF4B_HUMAN Eukaryotic translation initiation factor 4B OS=Homo sapiens GN=EIF4B PE=1 SV=2;tr|B4DS13|B4DS13_HUMAN Eukaryotic translation initiati	242340000	258790000	270370000	20851000	6549900	6994300	7307200	274770000	485890000	316710000	6	6	6	14.1	14.1	14.1	69.697	0	32.497	771500000	13	9	3	5	4	3	5	4	3	5	4	8	10.1	10.1	4	5	4
665	E7EX90;Q14203-3;Q14203-4;Q14203-5;Q14203-6;Q14203;Q14203-2;Q6AWB1;E7EWF7;C9J1B7;C9JZA4;C9JTE5;C9JJN7;C9JJD0;C9JKG6;E9PCY0	E7EX90;Q14203-3;Q14203-4;Q14203-5;Q14203-6;Q14203;Q14203-2	Dynactin subunit 1	DCTN1	tr|E7EX90|E7EX90_HUMAN Uncharacterized protein OS=Homo sapiens GN=DCTN1 PE=1 SV=1;sp|Q14203-3|DCTN1_HUMAN Isoform 3 of Dynactin subunit 1 OS=Homo sapiens GN=DCTN1;sp|Q14203-4|DCTN1_HUMAN Isoform 4 of Dynactin subunit 1 OS=Homo sapiens GN=DCTN1;sp|Q14203-5|	982830000	320640000	1164900000	34765000	13843000	4516000	16407000	950820000	1010100000	944820000	25	25	24	30	30	29.5	139.09	0	203.89	2468300000	46	16	19	10	15	19	10	15	18	9	14	23.7	10.7	19.1	20	12	14
666	E7EXA6;Q8WVB6;Q8WVB6-2;F8WCC1;Q8WVB6-3	E7EXA6;Q8WVB6;Q8WVB6-2;F8WCC1;Q8WVB6-3	Chromosome transmission fidelity protein 18 homolog	CHTF18	tr|E7EXA6|E7EXA6_HUMAN Chromosome transmission fidelity protein 18 homolog OS=Homo sapiens GN=CHTF18 PE=1 SV=2;sp|Q8WVB6|CTF18_HUMAN Chromosome transmission fidelity protein 18 homolog OS=Homo sapiens GN=CHTF18 PE=1 SV=1;sp|Q8WVB6-2|CTF18_HUMAN Isoform 2 o	19155000	0	0	354730	354730	0	0	14859000	0	0	2	2	2	2.1	2.1	2.1	107.43	0.0011472	2.291	19155000	2	5	2	0	0	2	0	0	2	0	0	2.1	0	0	2	0	0
667	E9PAM4	E9PAM4			tr|E9PAM4|E9PAM4_HUMAN Uncharacterized protein OS=Homo sapiens PE=4 SV=1	0	19982000	38180000	1615600	0	555050	1060500	0	0	37602000	19	3	0	50.1	11.1	0	51.218	0.0067621	1.6245	58161000	3	1	10	12	13	0	1	2	0	0	0	29.4	29	37.4	0	1	2
668	F8VZJ2;H0YHX9;Q13765;E9PAV3-2;E9PAV3;F8W0W4;F8W1N5;F8VNW4;F8VZ58;Q9BZK3	F8VZJ2;H0YHX9;Q13765;E9PAV3-2;E9PAV3;F8W0W4;F8W1N5;F8VNW4	Nascent polypeptide-associated complex subunit alpha;Nascent polypeptide-associated complex subunit alpha, muscle-specific form	NACA	tr|F8VZJ2|F8VZJ2_HUMAN Nascent polypeptide-associated complex subunit alpha, muscle-specific form OS=Homo sapiens GN=NACA PE=1 SV=1;tr|H0YHX9|H0YHX9_HUMAN Nascent polypeptide-associated complex subunit alpha, muscle-specific form (Fragment) OS=Homo sapiens	1193500000	616730000	819700000	438310000	198910000	102790000	136620000	1417400000	1288600000	838320000	5	5	5	51.5	51.5	51.5	15.016	0	29.258	2629900000	19	10	3	4	3	3	4	3	3	4	3	31.6	40.4	30.9	4	10	5
669	E9PB90;P52790	E9PB90	Hexokinase	HK2	tr|E9PB90|E9PB90_HUMAN Hexokinase-2 OS=Homo sapiens GN=HK2 PE=1 SV=1	0	0	0	0	0	0	0	0	0	0	45	1	1	54.6	1.3	1.3	98.972	1	-2	0	1	2	39	27	39	1	0	0	1	0	0	46.3	36.2	51.7	1	0	0
670	E9PC52;Q16576;Q16576-2;Q5JP02;Q5JP01;Q5JNZ6;C9JAJ9;C9J7L0	E9PC52;Q16576;Q16576-2;Q5JP02;Q5JP01	Histone-binding protein RBBP7	RBBP7	tr|E9PC52|E9PC52_HUMAN Histone-binding protein RBBP7 OS=Homo sapiens GN=RBBP7 PE=1 SV=1;sp|Q16576|RBBP7_HUMAN Histone-binding protein RBBP7 OS=Homo sapiens GN=RBBP7 PE=1 SV=1;sp|Q16576-2|RBBP7_HUMAN Isoform 2 of Histone-binding protein RBBP7 OS=Homo sapien	365170000	16655000	249450000	37134000	21481000	979720	14673000	228220000	0	297230000	14	8	8	48.6	38	38	46.938	0	18.679	631280000	13	8	12	5	10	6	1	4	6	1	4	36.3	15.4	28.4	6	2	5
671	E9PC66;P17029;B3KRF7;C9JRM9	E9PC66;P17029;B3KRF7	Zinc finger protein with KRAB and SCAN domains 1	ZKSCAN1	tr|E9PC66|E9PC66_HUMAN Zinc finger protein with KRAB and SCAN domains 1 OS=Homo sapiens GN=ZKSCAN1 PE=1 SV=1;sp|P17029|ZKSC1_HUMAN Zinc finger protein with KRAB and SCAN domains 1 OS=Homo sapiens GN=ZKSCAN1 PE=1 SV=3;tr|B3KRF7|B3KRF7_HUMAN Zinc finger prot	92856000	45634000	74611000	6457600	2813800	1382800	2260900	69794000	111870000	72632000	5	5	5	13.1	13.1	13.1	59.674	0	11.048	213100000	5	4	2	2	3	2	2	3	2	2	3	6.8	5.5	7.6	2	1	2
672	E9PC69;Q7KZI7-14;E7ETY4;Q7KZI7-13;Q7KZI7-15;Q7KZI7-16;Q7KZI7-12;Q7KZI7-3;Q7KZI7-6;Q7KZI7-11;Q7KZI7-8;Q7KZI7;Q7KZI7-10;Q7KZI7-7;Q7KZI7-2;Q7KZI7-5;Q7KZI7-4;Q7KZI7-9;F5H4F6;F5H6N2	E9PC69;Q7KZI7-14;E7ETY4;Q7KZI7-13;Q7KZI7-15;Q7KZI7-16;Q7KZI7-12;Q7KZI7-3;Q7KZI7-6;Q7KZI7-11;Q7KZI7-8;Q7KZI7;Q7KZI7-10;Q7KZI7-7;Q7KZI7-2;Q7KZI7-5;Q7KZI7-4;Q7KZI7-9	Serine/threonine-protein kinase MARK2	MARK2	tr|E9PC69|E9PC69_HUMAN Serine/threonine-protein kinase MARK2 OS=Homo sapiens GN=MARK2 PE=1 SV=3;sp|Q7KZI7-14|MARK2_HUMAN Isoform 14 of Serine/threonine-protein kinase MARK2 OS=Homo sapiens GN=MARK2;tr|E7ETY4|E7ETY4_HUMAN Serine/threonine-protein kinase MAR	383890000	15282000	288950000	14336000	7997600	318370	6019800	308610000	41484000	255610000	14	14	10	26.1	26.1	20.1	86.69	0	73.368	688120000	22	20	9	2	9	9	2	9	7	2	6	17.1	4.8	16.8	11	2	9
673	E9PC74;Q13144;C9JRD9;H7C2X0	E9PC74;Q13144	Translation initiation factor eIF-2B subunit epsilon	EIF2B5	tr|E9PC74|E9PC74_HUMAN Translation initiation factor eIF-2B subunit epsilon OS=Homo sapiens GN=EIF2B5 PE=1 SV=1;sp|Q13144|EI2BE_HUMAN Translation initiation factor eIF-2B subunit epsilon OS=Homo sapiens GN=EIF2B5 PE=1 SV=3	365660000	55592000	464850000	27691000	11427000	1737300	14527000	350570000	274760000	230110000	10	10	10	22.6	22.6	22.6	78.346	0	29.863	886100000	22	4	7	3	9	7	3	9	7	3	9	13.2	5.7	21.6	10	3	9
674	E9PC87;O94876-2;O94876;Q6N039	E9PC87;O94876-2;O94876;Q6N039	Transmembrane and coiled-coil domains protein 1	TMCC1;DKFZp686H13261	tr|E9PC87|E9PC87_HUMAN Transmembrane and coiled-coil domains protein 1 OS=Homo sapiens GN=TMCC1 PE=1 SV=1;sp|O94876-2|TMCC1_HUMAN Isoform 2 of Transmembrane and coiled-coil domains protein 1 OS=Homo sapiens GN=TMCC1;sp|O94876|TMCC1_HUMAN Transmembrane and	956650000	316260000	295530000	52281000	31888000	10542000	9850900	837270000	684630000	404870000	6	6	6	11.9	11.9	11.9	59.372	0	45.018	1568400000	18	4	4	4	6	4	4	6	4	4	6	9.1	9.1	11.9	5	6	7
675	E9PC90;P14635;P14635-2;H0YA62;D6RHI0	E9PC90;P14635;P14635-2	G2/mitotic-specific cyclin-B1	CCNB1	tr|E9PC90|E9PC90_HUMAN G2/mitotic-specific cyclin-B1 (Fragment) OS=Homo sapiens GN=CCNB1 PE=1 SV=1;sp|P14635|CCNB1_HUMAN G2/mitotic-specific cyclin-B1 OS=Homo sapiens GN=CCNB1 PE=1 SV=1;sp|P14635-2|CCNB1_HUMAN Isoform 2 of G2/mitotic-specific cyclin-B1 OS=	300090000	89668000	265980000	32787000	15004000	4483400	13299000	262650000	227600000	192860000	5	5	5	17	17	17	44.932	0	8.1095	655730000	11	5	4	1	4	4	1	4	4	1	4	14.7	2	9.7	5	1	5
676	E9PCW1;O95249;K7EJC8;G5E9T8;A0A087WYX5;B4DQA8;O95249-2;Q96QI9;F6RU00	E9PCW1;O95249;K7EJC8;G5E9T8;A0A087WYX5;B4DQA8;O95249-2;Q96QI9	Golgi SNAP receptor complex member 1	GOSR1	tr|E9PCW1|E9PCW1_HUMAN Golgi SNAP receptor complex member 1 OS=Homo sapiens GN=GOSR1 PE=1 SV=1;sp|O95249|GOSR1_HUMAN Golgi SNAP receptor complex member 1 OS=Homo sapiens GN=GOSR1 PE=1 SV=1;tr|K7EJC8|K7EJC8_HUMAN Golgi SNAP receptor complex member 1 OS=Homo	1910600000	421140000	1732900000	203230000	95530000	21057000	86646000	2030500000	825370000	1456100000	12	12	12	48.8	48.8	48.8	28.293	0	56.606	4064700000	51	9	12	8	9	12	8	9	12	8	9	48.8	40.7	37.1	21	9	21
677	E9PDF6;O43795;E7EQD9;H7C2Y7;C9JYW1;C9JUP5;Q8N1T3-3;Q8N1T3	E9PDF6;O43795	Unconventional myosin-Ib	MYO1B	tr|E9PDF6|E9PDF6_HUMAN Unconventional myosin-Ib OS=Homo sapiens GN=MYO1B PE=1 SV=1;sp|O43795|MYO1B_HUMAN Unconventional myosin-Ib OS=Homo sapiens GN=MYO1B PE=1 SV=3	29948000000	10462000000	27953000000	990770000	434030000	151620000	405120000	27641000000	22083000000	25007000000	56	56	1	56.7	56.7	1.4	128.48	0	323.31	68363000000	410	8	48	44	43	48	44	43	1	1	1	53.2	44	46.4	128	129	153
678	E9PDR0;P05166;C9JQS9;E7EX59;P05166-2;E7ETT1;E7ETT4;E7EUY3;E9PEC3;F8WBI9;E7ENC1;H7C5C9;C9JVW9;C9JVY9;C9JAW3	E9PDR0;P05166;C9JQS9;E7EX59;P05166-2;E7ETT1;E7ETT4;E7EUY3;E9PEC3;F8WBI9	Propionyl-CoA carboxylase beta chain, mitochondrial	PCCB	tr|E9PDR0|E9PDR0_HUMAN Propionyl-CoA carboxylase beta chain, mitochondrial OS=Homo sapiens GN=PCCB PE=1 SV=1;sp|P05166|PCCB_HUMAN Propionyl-CoA carboxylase beta chain, mitochondrial OS=Homo sapiens GN=PCCB PE=1 SV=3;tr|C9JQS9|C9JQS9_HUMAN Propionyl-CoA car	5671900000	1525600000	4964300000	357700000	166820000	44870000	146010000	4450200000	4296800000	4230700000	27	27	27	67.6	67.6	67.6	59.403	0	236.71	12162000000	116	15	23	18	24	23	18	24	23	18	24	60.4	45.1	55.5	51	23	42
679	E9PE63;Q86UD5;D6RGJ7;B7Z676;Q86UD5-2	E9PE63;Q86UD5;D6RGJ7;B7Z676;Q86UD5-2	Mitochondrial sodium/hydrogen exchanger 9B2	SLC9B2	tr|E9PE63|E9PE63_HUMAN Mitochondrial sodium/hydrogen exchanger 9B2 OS=Homo sapiens GN=SLC9B2 PE=4 SV=1;sp|Q86UD5|SL9B2_HUMAN Mitochondrial sodium/hydrogen exchanger 9B2 OS=Homo sapiens GN=SLC9B2 PE=1 SV=2;tr|D6RGJ7|D6RGJ7_HUMAN Mitochondrial sodium/hydroge	160090000	13816000	33886000	11544000	8894000	767560	1882500	117500000	0	55009000	3	3	3	9.2	9.2	9.2	51.55	0	5.2169	207790000	3	5	2	1	1	2	1	1	2	1	1	6.5	2.7	3.1	2	0	1
680	E9PHM6;F6QMI7;E9PEB9;Q03001;E7ERU0;F8W9J4;Q03001-8;E7ETB9;Q03001-9;Q6P0N6;Q03001-13;Q03001-3;Q5T0V7;H0YBX0;H0YC82;Q03001-10	E9PHM6;F6QMI7;E9PEB9;Q03001;E7ERU0;F8W9J4;Q03001-8	Dystonin	DST	tr|E9PHM6|E9PHM6_HUMAN Dystonin OS=Homo sapiens GN=DST PE=1 SV=3;tr|F6QMI7|F6QMI7_HUMAN Dystonin OS=Homo sapiens GN=DST PE=1 SV=2;tr|E9PEB9|E9PEB9_HUMAN Dystonin OS=Homo sapiens GN=DST PE=1 SV=3;sp|Q03001|DYST_HUMAN Dystonin OS=Homo sapiens GN=DST PE=1 SV=	438220000	50091000	3959000000	12185000	1200600	137240	10847000	563190000	107460000	2287900000	41	35	35	9.8	8.7	8.7	629.78	0	44.525	4447300000	41	16	27	8	23	22	5	19	22	5	19	6.4	2.1	5.1	21	3	17
681	E9PEI0;Q69YH5	E9PEI0;Q69YH5	Cell division cycle-associated protein 2	CDCA2	tr|E9PEI0|E9PEI0_HUMAN Cell division cycle-associated protein 2 OS=Homo sapiens GN=CDCA2 PE=1 SV=1;sp|Q69YH5|CDCA2_HUMAN Cell division cycle-associated protein 2 OS=Homo sapiens GN=CDCA2 PE=1 SV=2	694850000	365290000	596590000	29065000	12190000	6408600	10466000	808500000	623370000	735820000	5	5	5	8.1	8.1	8.1	111.01	0	22.297	1656700000	14	2	5	2	3	5	2	3	5	2	3	8.1	2.3	4.5	6	4	4
682	E9PEJ6;P98196;H0Y547;H0Y8F0;A0A087WVE8;A2A3G9	E9PEJ6;P98196;H0Y547	Phospholipid-transporting ATPase;Probable phospholipid-transporting ATPase IH	ATP11A	tr|E9PEJ6|E9PEJ6_HUMAN Probable phospholipid-transporting ATPase IH OS=Homo sapiens GN=ATP11A PE=1 SV=1;sp|P98196|AT11A_HUMAN Probable phospholipid-transporting ATPase IH OS=Homo sapiens GN=ATP11A PE=1 SV=3;tr|H0Y547|H0Y547_HUMAN Probable phospholipid-tran	2456000000	219790000	2072200000	77835000	40262000	3603200	33970000	1841900000	1283300000	1454800000	25	25	23	26	26	24.8	135.85	0	59.576	4747900000	53	6	19	9	15	19	9	15	17	8	14	19.6	9.5	17.9	20	12	21
683	E9PEN0;Q8WYH8-2;Q8WYH8;H0YEH7;E9PJ14;A4KYM5;Q9UNL4-8;Q9UNL4-4;Q9UNL4-7;Q9UNL4-5;Q9UNL4-6;Q9UNL4-2;Q9UNL4	E9PEN0;Q8WYH8-2;Q8WYH8	Inhibitor of growth protein 5	ING5	tr|E9PEN0|E9PEN0_HUMAN Inhibitor of growth protein 5 OS=Homo sapiens GN=ING5 PE=1 SV=1;sp|Q8WYH8-2|ING5_HUMAN Isoform 2 of Inhibitor of growth protein 5 OS=Homo sapiens GN=ING5;sp|Q8WYH8|ING5_HUMAN Inhibitor of growth protein 5 OS=Homo sapiens GN=ING5 PE=1	101870000	8766600	16187000	11529000	9260900	796960	1471500	53891000	0	19188000	3	3	3	31	31	31	16.646	0	10.156	126820000	6	13	2	1	1	2	1	1	2	1	1	19.7	11.3	4.2	3	1	2
684	E9PEP7;P17010-2;P17010;P17010-3;P08048-2;P08048-3;P08048;Q9Y462;Q9Y462-2;Q9Y462-3	E9PEP7;P17010-2;P17010;P17010-3;P08048-2;P08048-3;P08048	Zinc finger X-chromosomal protein;Zinc finger Y-chromosomal protein	ZFX;ZFY	tr|E9PEP7|E9PEP7_HUMAN Zinc finger X-chromosomal protein OS=Homo sapiens GN=ZFX PE=4 SV=1;sp|P17010-2|ZFX_HUMAN Isoform 2 of Zinc finger X-chromosomal protein OS=Homo sapiens GN=ZFX;sp|P17010|ZFX_HUMAN Zinc finger X-chromosomal protein OS=Homo sapiens GN=Z	143800000	10793000	117530000	9718600	5135600	385470	4197500	106610000	35724000	129750000	5	5	5	7.2	7.2	7.2	85.197	0	23.011	272120000	9	10	4	1	4	4	1	4	4	1	4	5.7	1.7	6.1	5	0	4
685	E9PER6;O15530-2;O15530-3;O15530;O15530-4;Q6A1A2;O15530-5;H3BQ10	E9PER6;O15530-2;O15530-3;O15530;O15530-4;Q6A1A2;O15530-5	3-phosphoinositide-dependent protein kinase 1;Putative 3-phosphoinositide-dependent protein kinase 2	PDPK1;PDPK2P	tr|E9PER6|E9PER6_HUMAN 3-phosphoinositide-dependent protein kinase 1 OS=Homo sapiens GN=PDPK1 PE=1 SV=1;sp|O15530-2|PDPK1_HUMAN Isoform 2 of 3-phosphoinositide-dependent protein kinase 1 OS=Homo sapiens GN=PDPK1;sp|O15530-3|PDPK1_HUMAN Isoform 3 of 3-phosp	367160000	24782000	166100000	18601000	12239000	826070	5536600	221240000	88789000	217310000	7	7	7	18.5	18.5	18.5	60.328	0	35.914	558040000	15	8	5	2	5	5	2	5	5	2	5	13.6	5.7	14	7	1	7
686	E9PF19;Q9Y4P3;Q96E41;A0A087WXC6;F8WDI9;F8WCR3	E9PF19;Q9Y4P3;Q96E41	Transducin beta-like protein 2	TBL2	tr|E9PF19|E9PF19_HUMAN Transducin beta-like protein 2 OS=Homo sapiens GN=TBL2 PE=1 SV=1;sp|Q9Y4P3|TBL2_HUMAN Transducin beta-like protein 2 OS=Homo sapiens GN=TBL2 PE=1 SV=1;tr|Q96E41|Q96E41_HUMAN TBL2 protein OS=Homo sapiens GN=TBL2 PE=1 SV=1	9101600000	4320600000	7012100000	681140000	303390000	144020000	233740000	8003700000	8006400000	7701700000	29	29	29	70.6	70.6	70.6	45.935	0	282.25	20434000000	136	6	24	23	17	24	23	17	24	23	17	64.2	64.5	50.1	41	43	52
687	E9PF58;Q92747-2;Q92747	E9PF58;Q92747-2;Q92747	Actin-related protein 2/3 complex subunit 1A	ARPC1A	tr|E9PF58|E9PF58_HUMAN Actin-related protein 2/3 complex subunit 1A OS=Homo sapiens GN=ARPC1A PE=1 SV=1;sp|Q92747-2|ARC1A_HUMAN Isoform 2 of Actin-related protein 2/3 complex subunit 1A OS=Homo sapiens GN=ARPC1A;sp|Q92747|ARC1A_HUMAN Actin-related protein	26655000	7341600	32976000	3524900	1402900	386400	1735600	20629000	18583000	26326000	4	3	3	21.1	12.9	12.9	30.888	0.00017921	3.8166	66973000	5	3	3	2	3	2	1	2	2	1	2	15.1	14.3	18.6	2	1	2
688	G5E965;E9PFD3;Q9H334-4;Q9H334;H0Y882;C9J0F0;A0A087X299;Q9H334-3;Q9H334-6;Q9H334-2;A0A087WVT2;C9IYY1;A0A087X2G3;C9J5T4	G5E965;E9PFD3;Q9H334-4;Q9H334;H0Y882;C9J0F0;A0A087X299;Q9H334-3;Q9H334-6;Q9H334-2	Forkhead box protein P1	FOXP1	tr|G5E965|G5E965_HUMAN Forkhead box P1, isoform CRA_f OS=Homo sapiens GN=FOXP1 PE=1 SV=1;tr|E9PFD3|E9PFD3_HUMAN Forkhead box protein P1 OS=Homo sapiens GN=FOXP1 PE=1 SV=1;sp|Q9H334-4|FOXP1_HUMAN Isoform 4 of Forkhead box protein P1 OS=Homo sapiens GN=FOXP1	391680000	44179000	408030000	38359000	17804000	2008100	18547000	260280000	144810000	439520000	10	10	1	28.4	28.4	3.2	63.217	0	37.429	843890000	15	14	6	2	7	6	2	7	1	0	0	19.4	3.5	18	6	3	6
689	E9PFK9;Q9UJ41-2;Q9UJ41-4;Q9UJ41-3;Q9UJ41	E9PFK9;Q9UJ41-2;Q9UJ41-4;Q9UJ41-3;Q9UJ41	Rab5 GDP/GTP exchange factor	RABGEF1	tr|E9PFK9|E9PFK9_HUMAN Rab5 GDP/GTP exchange factor OS=Homo sapiens GN=RABGEF1 PE=1 SV=1;sp|Q9UJ41-2|RABX5_HUMAN Isoform 2 of Rab5 GDP/GTP exchange factor OS=Homo sapiens GN=RABGEF1;sp|Q9UJ41-4|RABX5_HUMAN Isoform 4 of Rab5 GDP/GTP exchange factor OS=Homo	26506000	38227000	0	1903900	779600	1124300	0	0	91395000	0	3	3	3	7.9	7.9	7.9	58.394	0.00017848	3.726	64734000	3	5	2	1	0	2	1	0	2	1	0	3.8	4.2	0	2	1	0
690	E9PGF6;E9PFQ4;Q86SQ0-2;Q86SQ0-3;Q86SQ0;G5E9V3	E9PGF6;E9PFQ4;Q86SQ0-2;Q86SQ0-3;Q86SQ0	Pleckstrin homology-like domain family B member 2	PHLDB2	tr|E9PGF6|E9PGF6_HUMAN Uncharacterized protein OS=Homo sapiens GN=PHLDB2 PE=1 SV=1;tr|E9PFQ4|E9PFQ4_HUMAN Pleckstrin homology-like domain family B member 2 (Fragment) OS=Homo sapiens GN=PHLDB2 PE=1 SV=1;sp|Q86SQ0-2|PHLB2_HUMAN Isoform 2 of Pleckstrin homol	137610000	0	50935000	3928100	2866900	0	1061100	87793000	0	74607000	4	4	4	5.9	5.9	5.9	86.647	0	4.8449	188550000	6	6	4	0	2	4	0	2	4	0	2	5.9	0	3	4	0	2
691	E9PFR3;Q14738-2;Q14738;Q14738-3;H0Y8C4;H7C5Q9;H0YJ35;H0YJU0	E9PFR3;Q14738-2;Q14738;Q14738-3;H0Y8C4	Serine/threonine-protein phosphatase 2A 56 kDa regulatory subunit delta isoform	PPP2R5D	tr|E9PFR3|E9PFR3_HUMAN Serine/threonine-protein phosphatase 2A 56 kDa regulatory subunit delta isoform OS=Homo sapiens GN=PPP2R5D PE=1 SV=1;sp|Q14738-2|2A5D_HUMAN Isoform Delta-2 of Serine/threonine-protein phosphatase 2A 56 kDa regulatory subunit delta is	652280000	89836000	440080000	36944000	20384000	2807400	13752000	481380000	211950000	380630000	12	12	8	26.9	26.9	16.7	69.116	0	37.066	1182200000	28	8	12	3	7	12	3	7	8	3	4	26.9	7.7	15.2	14	3	11
692	E9PFW3;Q96CW1;A0A087WY71;Q96CW1-2;C9JJ47;C9JTK4;C9JGT8;C9JJD3;C9JPV8;H7C4C3	E9PFW3;Q96CW1;A0A087WY71;Q96CW1-2;C9JJ47	AP-2 complex subunit mu	AP2M1	tr|E9PFW3|E9PFW3_HUMAN AP-2 complex subunit mu OS=Homo sapiens GN=AP2M1 PE=1 SV=1;sp|Q96CW1|AP2M1_HUMAN AP-2 complex subunit mu OS=Homo sapiens GN=AP2M1 PE=1 SV=2;tr|A0A087WY71|A0A087WY71_HUMAN AP-2 complex subunit mu OS=Homo sapiens GN=AP2M1 PE=1 SV=1;sp|	8746800000	3376900000	8835900000	676120000	282150000	108930000	285030000	7069200000	8413100000	8173500000	24	24	24	53	53	53	52.303	0	165.2	20960000000	125	10	21	20	18	21	20	18	21	20	18	48.3	49.1	45.4	42	35	48
693	Q5TG12;E9PGC5;Q15262-2;Q15262-3;Q15262-4;Q15262;H0Y6P5;H0Y6V4;H0YDP9;E9PRW2	Q5TG12;E9PGC5;Q15262-2;Q15262-3;Q15262-4;Q15262	Protein-tyrosine-phosphatase;Receptor-type tyrosine-protein phosphatase kappa	PTPRK	tr|Q5TG12|Q5TG12_HUMAN Receptor-type tyrosine-protein phosphatase kappa OS=Homo sapiens GN=PTPRK PE=4 SV=1;tr|E9PGC5|E9PGC5_HUMAN Receptor-type tyrosine-protein phosphatase kappa OS=Homo sapiens GN=PTPRK PE=4 SV=1;sp|Q15262-2|PTPRK_HUMAN Isoform 2 of Recep	1998500000	518450000	1302800000	51618000	27006000	7006000	17605000	1505300000	1287800000	1253700000	28	28	27	27.8	27.8	27.1	164.2	0	103.43	3819700000	64	10	20	10	19	20	10	19	19	9	18	20.9	9.9	18.7	26	14	24
694	E9PGF5;E9PF55;Q9HBL0;E7ERH1;A0A087WWW7;E7EMG1;Q59G71;Q9HBL0-2;C9JI43;C9JFT7;C9J8K5	E9PGF5;E9PF55;Q9HBL0;E7ERH1;A0A087WWW7	Tensin-1	TNS1	tr|E9PGF5|E9PGF5_HUMAN Tensin-1 OS=Homo sapiens GN=TNS1 PE=1 SV=1;tr|E9PF55|E9PF55_HUMAN Tensin-1 OS=Homo sapiens GN=TNS1 PE=1 SV=1;sp|Q9HBL0|TENS1_HUMAN Tensin-1 OS=Homo sapiens GN=TNS1 PE=1 SV=2;tr|E7ERH1|E7ERH1_HUMAN Tensin-1 (Fragment) OS=Homo sapiens	150150000	0	91477000	2745700	1706200	0	1039500	90722000	0	101500000	7	6	6	6.7	5.9	5.9	183.22	0	18.689	241620000	8	11	5	1	5	4	0	4	4	0	4	4.7	0.8	4.3	4	0	4
695	E9PGM9;P78332;F8WCA5;P78332-2;F8WF63;C9JSL1;B4E0G6	E9PGM9;P78332;F8WCA5;P78332-2	RNA-binding protein 6	RBM6	tr|E9PGM9|E9PGM9_HUMAN RNA-binding protein 6 OS=Homo sapiens GN=RBM6 PE=1 SV=1;sp|P78332|RBM6_HUMAN RNA-binding protein 6 OS=Homo sapiens GN=RBM6 PE=1 SV=5;tr|F8WCA5|F8WCA5_HUMAN RNA-binding protein 6 OS=Homo sapiens GN=RBM6 PE=1 SV=1;sp|P78332-2|RBM6_HUMA	144690000	2320500	254320000	5901900	2127800	34125	3740000	167480000	15925000	177440000	5	4	4	7.1	6.2	6.2	113.93	0	8.8179	401330000	11	7	5	1	3	4	1	3	4	1	3	7.1	1.6	4	6	1	4
696	E9PGQ0;Q96H78	E9PGQ0;Q96H78	Solute carrier family 25 member 44	SLC25A44	tr|E9PGQ0|E9PGQ0_HUMAN Solute carrier family 25 member 44 OS=Homo sapiens GN=SLC25A44 PE=3 SV=3;sp|Q96H78|S2544_HUMAN Solute carrier family 25 member 44 OS=Homo sapiens GN=SLC25A44 PE=2 SV=1	79136000	0	8588600	5482800	4946000	0	536790	39462000	0	26157000	4	4	4	20.2	20.2	20.2	36.316	0	5.6242	87724000	5	2	3	0	2	3	0	2	3	0	2	17.7	0	11.8	3	0	2
697	E9PGT3;E9PRI4;Q15418;Q15418-2;Q15418-3;E9PMM7;D6R910;E9PAN7;D6RHW7;Q5SVM7;Q5SVM6;V9GXZ1;E7ERL6;E7EWQ5;J3QT34;O60307;Q9Y2H9;Q6P0Q8-2;Q6P0Q8;O15021-2;O15021-3;O15021-1;O15021	E9PGT3;E9PRI4;Q15418;Q15418-2;Q15418-3	Ribosomal protein S6 kinase;Ribosomal protein S6 kinase alpha-1	RPS6KA1	tr|E9PGT3|E9PGT3_HUMAN Ribosomal protein S6 kinase OS=Homo sapiens GN=RPS6KA1 PE=1 SV=1;tr|E9PRI4|E9PRI4_HUMAN Ribosomal protein S6 kinase OS=Homo sapiens GN=RPS6KA1 PE=1 SV=1;sp|Q15418|KS6A1_HUMAN Ribosomal protein S6 kinase alpha-1 OS=Homo sapiens GN=RPS	14019000	0	72165000	1833700	298280	0	1535400	0	0	66064000	13	3	3	23.3	6.8	6.8	81.471	0	7.8922	86184000	3	23	12	5	7	2	0	1	2	0	1	20.6	7.5	12.7	2	0	1
698	E9PGT6;Q99627-2;Q99627;H7C3S9	E9PGT6;Q99627-2;Q99627;H7C3S9	COP9 signalosome complex subunit 8	COPS8	tr|E9PGT6|E9PGT6_HUMAN COP9 signalosome complex subunit 8 OS=Homo sapiens GN=COPS8 PE=1 SV=1;sp|Q99627-2|CSN8_HUMAN Isoform 2 of COP9 signalosome complex subunit 8 OS=Homo sapiens GN=COPS8;sp|Q99627|CSN8_HUMAN COP9 signalosome complex subunit 8 OS=Homo sap	327230000	44910000	195670000	70976000	40903000	5613800	24459000	134490000	262780000	132550000	4	4	4	36.4	36.4	36.4	19.344	0	17.57	567810000	11	4	4	2	3	4	2	3	4	2	3	36.4	16.8	28.9	5	2	4
699	E9PGZ1;Q05682-5;Q05682-4;C9J813;E7EX44;Q05682-3;Q05682-6;Q05682-2;Q05682;C9JEK3;REV__H0Y876;REV__Q96JN2-2;REV__H7C4R2;REV__Q96JN2;REV__Q96JN2-4	E9PGZ1;Q05682-5;Q05682-4;C9J813;E7EX44;Q05682-3;Q05682-6;Q05682-2;Q05682	Caldesmon	CALD1	tr|E9PGZ1|E9PGZ1_HUMAN Caldesmon OS=Homo sapiens GN=CALD1 PE=1 SV=1;sp|Q05682-5|CALD1_HUMAN Isoform 5 of Caldesmon OS=Homo sapiens GN=CALD1;sp|Q05682-4|CALD1_HUMAN Isoform 4 of Caldesmon OS=Homo sapiens GN=CALD1;tr|C9J813|C9J813_HUMAN Caldesmon (Fragment)	264990000	119020000	183270000	17727000	8280900	3719500	5727100	210250000	290080000	208740000	11	10	10	27.6	26.5	26.5	61.705	0	36.588	567280000	15	15	6	7	4	5	6	4	5	6	4	17.2	15.1	12.5	5	6	4
700	E9PH99;Q9Y4E5-2;Q9Y4E5	E9PH99;Q9Y4E5-2;Q9Y4E5	Zinc finger protein 451	ZNF451	tr|E9PH99|E9PH99_HUMAN Zinc finger protein 451 OS=Homo sapiens GN=ZNF451 PE=1 SV=1;sp|Q9Y4E5-2|ZN451_HUMAN Isoform 2 of Zinc finger protein 451 OS=Homo sapiens GN=ZNF451;sp|Q9Y4E5|ZN451_HUMAN Zinc finger protein 451 OS=Homo sapiens GN=ZNF451 PE=1 SV=2	48911000	0	7539100	868460	752480	0	115990	34990000	0	0	2	2	2	2	2	2	119.33	0.00034072	2.8565	56450000	0	3	2	0	1	2	0	1	2	0	1	2	0	1.2	0	0	0
701	E9PHA2;Q15003;C9J470;Q15003-2;C9JZP1;H7C415	E9PHA2;Q15003;C9J470;Q15003-2;C9JZP1	Condensin complex subunit 2	NCAPH	tr|E9PHA2|E9PHA2_HUMAN Condensin complex subunit 2 OS=Homo sapiens GN=NCAPH PE=1 SV=1;sp|Q15003|CND2_HUMAN Condensin complex subunit 2 OS=Homo sapiens GN=NCAPH PE=1 SV=3;tr|C9J470|C9J470_HUMAN Condensin complex subunit 2 (Fragment) OS=Homo sapiens GN=NCAPH	205630000	57447000	5506900	7067900	5411200	1511800	144920	138640000	0	7453800	6	6	6	15.6	15.6	15.6	81.572	0	9.5291	268580000	8	6	5	1	1	5	1	1	5	1	1	13.8	1.8	1.1	6	1	1
702	E9PHH9;Q9BUI4	E9PHH9;Q9BUI4	DNA-directed RNA polymerase III subunit RPC3	POLR3C	tr|E9PHH9|E9PHH9_HUMAN DNA-directed RNA polymerase III subunit RPC3 OS=Homo sapiens GN=POLR3C PE=1 SV=1;sp|Q9BUI4|RPC3_HUMAN DNA-directed RNA polymerase III subunit RPC3 OS=Homo sapiens GN=POLR3C PE=1 SV=1	146660000	0	50892000	6812100	5057100	0	1754900	109210000	0	63846000	2	2	2	6.3	6.3	6.3	46.189	0	11.311	197550000	6	2	2	0	2	2	0	2	2	0	2	6.3	0	6.3	3	0	3
703	E9PHX8;Q12866;A0A087WZQ5;H7C3L9	E9PHX8;Q12866;A0A087WZQ5	Receptor protein-tyrosine kinase;Tyrosine-protein kinase Mer	MERTK	tr|E9PHX8|E9PHX8_HUMAN Tyrosine-protein kinase Mer OS=Homo sapiens GN=MERTK PE=1 SV=1;sp|Q12866|MERTK_HUMAN Tyrosine-protein kinase Mer OS=Homo sapiens GN=MERTK PE=1 SV=2;tr|A0A087WZQ5|A0A087WZQ5_HUMAN Tyrosine-protein kinase Mer OS=Homo sapiens GN=MERTK P	114210000	36115000	29008000	4075700	2595600	820800	659270	0	86187000	0	5	5	4	6.3	6.3	5.1	91.021	0.00034578	3.0846	179330000	5	4	1	2	2	1	2	2	1	1	2	1.6	2.2	2.6	1	2	2
704	E9PHY5;O43491-4;E9PK52;O43491-3;E9PII3;O43491-2;I6L9B1;E9PQD2;E9PRG1;E9PIG0;E9PQN0;E9PJP4;J3QS55	E9PHY5;O43491-4;E9PK52;O43491-3;E9PII3;O43491-2;I6L9B1	Band 4.1-like protein 2	EPB41L2	tr|E9PHY5|E9PHY5_HUMAN Band 4.1-like protein 2 OS=Homo sapiens GN=EPB41L2 PE=1 SV=1;sp|O43491-4|E41L2_HUMAN Isoform 4 of Band 4.1-like protein 2 OS=Homo sapiens GN=EPB41L2;tr|E9PK52|E9PK52_HUMAN Band 4.1-like protein 2 OS=Homo sapiens GN=EPB41L2 PE=1 SV=1;	118280000	300690000	0	7481500	2112100	5369400	0	331610000	625420000	0	45	1	0	58.5	1.3	0	104.36	0	5.1186	418960000	5	13	36	36	37	1	1	0	0	0	0	53.9	52.7	51.2	1	4	0
705	E9PI08;Q9Y256;E9PKA7;E9PPV9	E9PI08;Q9Y256;E9PKA7	CAAX prenyl protease 2	RCE1	tr|E9PI08|E9PI08_HUMAN CAAX prenyl protease 2 OS=Homo sapiens GN=RCE1 PE=1 SV=1;sp|Q9Y256|FACE2_HUMAN CAAX prenyl protease 2 OS=Homo sapiens GN=RCE1 PE=1 SV=1;tr|E9PKA7|E9PKA7_HUMAN CAAX prenyl protease 2 OS=Homo sapiens GN=RCE1 PE=4 SV=1	84026000	190240000	749490000	93069000	7638700	17295000	68135000	185530000	431260000	589700000	4	4	4	17.5	17.5	17.5	33.429	0	30.361	1023800000	14	4	2	3	3	2	3	3	2	3	3	10.4	13.3	14.6	4	5	5
706	E9PI10;F8W6N5;Q3YBR2	E9PI10;F8W6N5;Q3YBR2	Transforming growth factor beta regulator 1	TBRG1	tr|E9PI10|E9PI10_HUMAN Transforming growth factor beta regulator 1 OS=Homo sapiens GN=TBRG1 PE=1 SV=1;tr|F8W6N5|F8W6N5_HUMAN Transforming growth factor beta regulator 1 OS=Homo sapiens GN=TBRG1 PE=1 SV=1;sp|Q3YBR2|TBRG1_HUMAN Transforming growth factor bet	13960000	0	0	2792100	2792100	0	0	13960000	0	0	1	1	1	14.9	14.9	14.9	11.514	0.0055345	1.7061	13960000	1	3	1	0	0	1	0	0	1	0	0	14.9	0	0	1	0	0
707	E9PI60;Q9ULD4;H0Y7B4;F6XDC4;E9PSF3;Q9ULD4-3;Q9ULD4-2;A8WI62;A8WI61;H0Y7I6	E9PI60;Q9ULD4;H0Y7B4;F6XDC4;E9PSF3;Q9ULD4-3;Q9ULD4-2	Bromodomain and PHD finger-containing protein 3	BRPF3	tr|E9PI60|E9PI60_HUMAN Bromodomain and PHD finger-containing protein 3 OS=Homo sapiens GN=BRPF3 PE=1 SV=1;sp|Q9ULD4|BRPF3_HUMAN Bromodomain and PHD finger-containing protein 3 OS=Homo sapiens GN=BRPF3 PE=1 SV=2;tr|H0Y7B4|H0Y7B4_HUMAN Bromodomain and PHD fi	228560000	12293000	235770000	7943600	3809300	204890	3929400	231690000	0	173630000	11	10	10	12.8	11.9	11.9	124.11	0	17.932	476620000	16	10	7	2	6	7	1	6	7	1	6	8.2	1.7	7.9	8	1	7
708	Q5T6K7;E9PI99;Q5T6K5;Q13952-6;Q13952-7;Q13952-2;Q13952-5;Q13952-3;Q13952;Q13952-4;E9PL11;E9PJA8;E9PQR2;A0A087WXG1	Q5T6K7;E9PI99;Q5T6K5;Q13952-6;Q13952-7;Q13952-2;Q13952-5;Q13952-3;Q13952;Q13952-4;E9PL11	Nuclear transcription factor Y subunit gamma	NFYC	tr|Q5T6K7|Q5T6K7_HUMAN Nuclear transcription factor Y subunit gamma (Fragment) OS=Homo sapiens GN=NFYC PE=1 SV=1;tr|E9PI99|E9PI99_HUMAN Nuclear transcription factor Y subunit gamma (Fragment) OS=Homo sapiens GN=NFYC PE=1 SV=1;tr|Q5T6K5|Q5T6K5_HUMAN Nuclear	187730000	34392000	172450000	43841000	20858000	3821400	19161000	176970000	113060000	160330000	4	4	4	32.6	32.6	32.6	14.909	0	6.3442	394570000	12	14	4	1	3	4	1	3	4	1	3	32.6	6.2	25.6	6	1	5
709	E9PID8;P33240-2;P33240;E7EWR4;Q9H0L4	E9PID8;P33240-2;P33240;E7EWR4	Cleavage stimulation factor subunit 2	CSTF2	tr|E9PID8|E9PID8_HUMAN Cleavage stimulation factor subunit 2 OS=Homo sapiens GN=CSTF2 PE=1 SV=1;sp|P33240-2|CSTF2_HUMAN Isoform 2 of Cleavage stimulation factor subunit 2 OS=Homo sapiens GN=CSTF2;sp|P33240|CSTF2_HUMAN Cleavage stimulation factor subunit 2	1032900000	428210000	760730000	100990000	46948000	19464000	34579000	865070000	1012000000	774140000	13	13	13	42	42	42	46.665	0	52.82	2221800000	38	5	9	6	9	9	6	9	9	6	9	31.1	24.4	30.6	13	10	15
710	E9PIE4	E9PIE4		MTCH2	tr|E9PIE4|E9PIE4_HUMAN Mitochondrial carrier homolog 2 (Fragment) OS=Homo sapiens GN=MTCH2 PE=1 SV=3	975390000	278690000	636190000	171840000	88672000	25336000	57835000	1087800000	550090000	557840000	13	1	1	60.1	4.6	4.6	28.662	0	16.704	1890300000	8	1	12	12	13	1	1	1	1	1	1	60.1	60.1	60.1	2	3	3
711	E9PJ24;F8WEF5;Q9P1Y6-3;Q9P1Y6;Q9P1Y6-2	E9PJ24;F8WEF5;Q9P1Y6-3;Q9P1Y6;Q9P1Y6-2	PHD and RING finger domain-containing protein 1	PHRF1	tr|E9PJ24|E9PJ24_HUMAN PHD and RING finger domain-containing protein 1 OS=Homo sapiens GN=PHRF1 PE=1 SV=1;tr|F8WEF5|F8WEF5_HUMAN PHD and RING finger domain-containing protein 1 OS=Homo sapiens GN=PHRF1 PE=1 SV=1;sp|Q9P1Y6-3|PHRF1_HUMAN Isoform 3 of PHD and	406560000	29370000	331490000	10513000	5569400	402330	4541000	302860000	106360000	282690000	12	12	12	13.1	13.1	13.1	178.22	0	36.415	767430000	23	5	10	2	8	10	2	8	10	2	8	10.6	3	10	12	2	9
712	E9PJ81;E9PRQ7;Q04323;Q04323-2;A0A087WTZ5;E9PS08	E9PJ81;E9PRQ7;Q04323;Q04323-2;A0A087WTZ5	UBX domain-containing protein 1	UBXN1	tr|E9PJ81|E9PJ81_HUMAN UBX domain-containing protein 1 (Fragment) OS=Homo sapiens GN=UBXN1 PE=1 SV=1;tr|E9PRQ7|E9PRQ7_HUMAN UBX domain-containing protein 1 OS=Homo sapiens GN=UBXN1 PE=1 SV=1;sp|Q04323|UBXN1_HUMAN UBX domain-containing protein 1 OS=Homo sap	125930000	102160000	159300000	25825000	8395000	6810400	10620000	187430000	100130000	172440000	5	5	5	36.9	36.9	36.9	32.611	0	22.497	387380000	11	6	3	3	4	3	3	4	3	3	4	20.3	22.1	26.9	4	4	3
713	E9PJ95;Q9P000;Q9P000-2	E9PJ95;Q9P000;Q9P000-2	COMM domain-containing protein 9	COMMD9	tr|E9PJ95|E9PJ95_HUMAN COMM domain-containing protein 9 OS=Homo sapiens GN=COMMD9 PE=1 SV=1;sp|Q9P000|COMD9_HUMAN COMM domain-containing protein 9 OS=Homo sapiens GN=COMMD9 PE=1 SV=2;sp|Q9P000-2|COMD9_HUMAN Isoform 2 of COMM domain-containing protein 9 OS=	102970000	15100000	0	10734000	9360800	1372700	0	83825000	41762000	0	4	4	4	41.6	41.6	41.6	20.687	0	11.904	118070000	5	3	4	1	0	4	1	0	4	1	0	41.6	11.4	0	4	1	0
714	G3V1E0;E9PJM3;Q9UK99-3;Q9UK99-2;Q9UK99	G3V1E0;E9PJM3;Q9UK99-3;Q9UK99-2;Q9UK99	F-box only protein 3	FBXO3	tr|G3V1E0|G3V1E0_HUMAN F-box only protein 3 OS=Homo sapiens GN=FBXO3 PE=1 SV=1;tr|E9PJM3|E9PJM3_HUMAN F-box only protein 3 OS=Homo sapiens GN=FBXO3 PE=1 SV=1;sp|Q9UK99-3|FBX3_HUMAN Isoform 3 of F-box only protein 3 OS=Homo sapiens GN=FBXO3;sp|Q9UK99-2|FBX3	12867000	15325000	22207000	2964600	756880	901480	1306300	17014000	28873000	33052000	1	1	1	4.7	4.7	4.7	41.09	0.00034241	2.9496	50399000	2	5	1	1	1	1	1	1	1	1	1	4.7	4.7	4.7	1	1	0
715	E9PJN1;O75676-2;O75676	E9PJN1;O75676-2;O75676	Ribosomal protein S6 kinase;Ribosomal protein S6 kinase alpha-4	RPS6KA4	tr|E9PJN1|E9PJN1_HUMAN Ribosomal protein S6 kinase OS=Homo sapiens GN=RPS6KA4 PE=1 SV=1;sp|O75676-2|KS6A4_HUMAN Isoform 2 of Ribosomal protein S6 kinase alpha-4 OS=Homo sapiens GN=RPS6KA4;sp|O75676|KS6A4_HUMAN Ribosomal protein S6 kinase alpha-4 OS=Homo sa	24036000	9029000	0	703510	511400	192110	0	0	20120000	0	2	2	2	3.3	3.3	3.3	84.755	0.00018152	4.0912	33065000	2	3	1	1	0	1	1	0	1	1	0	1.4	1.8	0	1	1	0
716	E9PJW4;E9PM62	E9PJW4;E9PM62		WLS	tr|E9PJW4|E9PJW4_HUMAN Protein wntless homolog (Fragment) OS=Homo sapiens GN=WLS PE=1 SV=1;tr|E9PM62|E9PM62_HUMAN Protein wntless homolog (Fragment) OS=Homo sapiens GN=WLS PE=1 SV=1	0	228300000	0	17562000	0	17562000	0	0	522370000	0	1	1	1	9	9	9	15.782	1	-2	228300000	1	2	0	1	0	0	1	0	0	1	0	0	9	0	0	1	0
717	E9PS17;E9PK59;Q96KG9-3;Q96KG9-4;Q96KG9-2;Q96KG9;Q96KG9-5;Q96KG9-6;E9PPN3;H0YCI6;H0YDH0	E9PS17;E9PK59;Q96KG9-3;Q96KG9-4;Q96KG9-2;Q96KG9;Q96KG9-5;Q96KG9-6;E9PPN3	N-terminal kinase-like protein	SCYL1	tr|E9PS17|E9PS17_HUMAN N-terminal kinase-like protein OS=Homo sapiens GN=SCYL1 PE=1 SV=1;tr|E9PK59|E9PK59_HUMAN N-terminal kinase-like protein OS=Homo sapiens GN=SCYL1 PE=1 SV=1;sp|Q96KG9-3|NTKL_HUMAN Isoform 3 of N-terminal kinase-like protein OS=Homo sap	871410000	136430000	653700000	40525000	21254000	3327500	15944000	565410000	521060000	493010000	16	16	16	29.9	29.9	29.9	85.718	0	43.531	1661500000	33	11	9	7	11	9	7	11	9	7	11	16.6	14.2	18.7	12	6	15
718	E9PKB5;P35813-2;P35813;P35813-3;E9PJN3;E9PL75	E9PKB5;P35813-2;P35813;P35813-3;E9PJN3	Protein phosphatase 1A	PPM1A	tr|E9PKB5|E9PKB5_HUMAN Protein phosphatase 1A (Fragment) OS=Homo sapiens GN=PPM1A PE=1 SV=1;sp|P35813-2|PPM1A_HUMAN Isoform Alpha-2 of Protein phosphatase 1A OS=Homo sapiens GN=PPM1A;sp|P35813|PPM1A_HUMAN Protein phosphatase 1A OS=Homo sapiens GN=PPM1A PE=	0	10326000	13318000	2364500	0	1032600	1331800	0	0	14615000	3	2	2	25.7	19.3	19.3	20.644	0.0001794	3.8405	23645000	2	6	1	1	1	0	1	1	0	1	1	6.4	6.4	12.8	0	1	1
719	E9PKC0;E9PL74;E9PIK1	E9PKC0		PLEKHA7	tr|E9PKC0|E9PKC0_HUMAN Pleckstrin homology domain-containing family A member 7 OS=Homo sapiens GN=PLEKHA7 PE=1 SV=1	57844000	0	31082000	1058600	688620	0	370020	0	0	34986000	36	2	2	36.4	2.6	2.6	144.42	0.0061466	1.6495	88926000	2	3	25	16	24	1	0	1	1	0	1	26.8	19	26.6	1	0	1
720	H7BXH2;E9PKF6;Q5H9R7-3;Q5H9R7-4;Q5H9R7-6;Q5H9R7-2;Q5H9R7;Q5H9R7-5;E9PQP7;H0YEN2;E9PK08;E9PNN8	H7BXH2;E9PKF6;Q5H9R7-3;Q5H9R7-4;Q5H9R7-6;Q5H9R7-2;Q5H9R7;Q5H9R7-5;E9PQP7;H0YEN2	Serine/threonine-protein phosphatase 6 regulatory subunit 3	PPP6R3	tr|H7BXH2|H7BXH2_HUMAN Serine/threonine-protein phosphatase 6 regulatory subunit 3 OS=Homo sapiens GN=PPP6R3 PE=1 SV=1;tr|E9PKF6|E9PKF6_HUMAN Serine/threonine-protein phosphatase 6 regulatory subunit 3 OS=Homo sapiens GN=PPP6R3 PE=1 SV=1;sp|Q5H9R7-3|PP6R3_	125760000	13299000	80953000	4782900	2734000	289100	1759800	86869000	39229000	71102000	6	6	6	9.9	9.9	9.9	92.407	0	18.853	220010000	12	12	5	2	3	5	2	3	5	2	3	8.2	3.4	5.8	5	3	4
721	E9PKN0;E9PQ01;O94913	E9PKN0;E9PQ01;O94913	Pre-mRNA cleavage complex 2 protein Pcf11	PCF11	tr|E9PKN0|E9PKN0_HUMAN Pre-mRNA cleavage complex 2 protein Pcf11 (Fragment) OS=Homo sapiens GN=PCF11 PE=1 SV=1;tr|E9PQ01|E9PQ01_HUMAN Pre-mRNA cleavage complex 2 protein Pcf11 (Fragment) OS=Homo sapiens GN=PCF11 PE=1 SV=3;sp|O94913|PCF11_HUMAN Pre-mRNA cle	44401000	0	10121000	1048500	853870	0	194640	27878000	0	0	2	2	2	4.1	4.1	4.1	88.985	0.00018129	4.0695	54522000	2	3	1	0	1	1	0	1	1	0	1	2.4	0	1.7	1	0	1
722	E9PKT4;Q8N131-2;Q8N131	E9PKT4;Q8N131-2;Q8N131	Porimin	TMEM123	tr|E9PKT4|E9PKT4_HUMAN Porimin OS=Homo sapiens GN=TMEM123 PE=4 SV=1;sp|Q8N131-2|PORIM_HUMAN Isoform 2 of Porimin OS=Homo sapiens GN=TMEM123;sp|Q8N131|PORIM_HUMAN Porimin OS=Homo sapiens GN=TMEM123 PE=1 SV=1	1289200000	970310000	1090300000	1116600000	429750000	323440000	363440000	1200200000	1328400000	1267700000	1	1	1	7.5	7.5	7.5	12.737	0.0061446	1.6441	3349900000	11	3	1	1	1	1	1	1	1	1	1	7.5	7.5	7.5	4	4	3
723	E9PKT6	E9PKT6		CTSH	tr|E9PKT6|E9PKT6_HUMAN Cathepsin H (Fragment) OS=Homo sapiens GN=CTSH PE=1 SV=1	36784000	0	0	6130700	6130700	0	0	26410000	0	0	6	1	1	47.8	10.4	10.4	14.735	1	-2	36784000	1	1	6	1	3	1	0	0	1	0	0	47.8	9.7	37.3	1	0	0
724	E9PKX1;E9PKY2;Q5TAX3-2;Q5TAX3	E9PKX1;E9PKY2;Q5TAX3-2;Q5TAX3	Terminal uridylyltransferase 4	ZCCHC11	tr|E9PKX1|E9PKX1_HUMAN Terminal uridylyltransferase 4 (Fragment) OS=Homo sapiens GN=ZCCHC11 PE=1 SV=1;tr|E9PKY2|E9PKY2_HUMAN Terminal uridylyltransferase 4 (Fragment) OS=Homo sapiens GN=ZCCHC11 PE=1 SV=1;sp|Q5TAX3-2|TUT4_HUMAN Isoform 2 of Terminal uridyly	34890000	0	21978000	947800	581500	0	366300	23167000	0	16780000	2	2	2	2.3	2.3	2.3	103.18	1	-2	56868000	4	4	1	0	2	1	0	2	1	0	2	1	0	2.3	1	0	3
[truncated: 5,815 more rows]
