# Supplementary material for: An efficient method for high-pH peptide fractionation based on C18 StageTips for in-depth proteome profiling
Source: Royal Society of Chemistry journal article supplement (doi:10.1039/c9ay01269a), 2019-01-01
Supplement: c9ay01269a5.xlsx [file c9ay01269a5.xlsx]

## Sheet: supplementary_table_S3
Supplementary Table S3. List of identified protein groups in experiment 1 of triplicate analysis. This list includes the Uniprot accession nubmer, official gene symbol, and protein name of the identified protein groups. Searh results from Maxquant are also described.
No.	Protein IDs	Majority protein IDs	Protein names	Gene names	Fasta headers	Intensity P1_E1	Intensity P1_E2	Intensity P1_E3	iBAQ	iBAQ P1_E1	iBAQ P1_E2	iBAQ P1_E3	LFQ intensity P1_E1	LFQ intensity P1_E2	LFQ intensity P1_E3	Peptides	Razor + unique peptides	Unique peptides	Sequence coverage [%]	Unique + razor sequence coverage [%]	Unique sequence coverage [%]	Mol. weight [kDa]	Q-value	Score	Intensity	MS/MS count	MS/MS count P1_E1	MS/MS count P1_E2	MS/MS count P1_E3	Peptides P1_E1	Peptides P1_E2	Peptides P1_E3	Razor + unique peptides P1_E1	Razor + unique peptides P1_E2	Razor + unique peptides P1_E3	Unique peptides P1_E1	Unique peptides P1_E2	Unique peptides P1_E3
1	Q3V2T7;Q5VI45;Q9TET3;C4PAV8;B0LAD5;E3VQ38;G9B4I2;G9B4I1;G9B4H2;G9B4G5;G9B4G3;A0A023UL25;H8Y1I5;A0A023NE65;A0A023NCS0;A0A023NE78;A0A023NDP5;A0A023ND59;A0A023NDQ1;A0A023NCR8;A0A023NDP0;B3Y998;A8DUU6;Q36290;L0L4R1;L0L4K0;L0L1W8;V9TRK2;V9TQ89;V9TP30;V9TP20;V9TN76;A8DUS7;A8DUR3;W0SMJ3;W0SLU4;U6C8B8;U6C8B6;U6C7E5;U6C7D9;U6C6V9;U6C6V7;Q9TDS6;B1P8W3;R9TNV1;Q7JCZ3;Q71EK3;Q71EK1;Q71EJ7;Q3V2F9;G3EBA2;A3R3Q8…	Q3V2T7;Q5VI45;Q9TET3;C4PAV8;B0LAD5;E3VQ38;G9B4I2;G9B4I1;G9B4H2;G9B4G5;G9B4G3;A0A023UL25;H8Y1I5;A0A023NE65;A0A023NCS0;A0A023NE78;A0A023NDP5;A0A023ND59;A0A023NDQ1;A0A023NCR8;A0A023NDP0;B3Y998;A8DUU6;Q36290;L0L4R1;L0L4K0;L0L1W8;V9TRK2;V9TQ89;V9TP30;V9TP20;V9TN76;A8DUS7;A8DUR3;W0SMJ3;W0SLU4;U6C8B8;U6C8B6;U6C7E5;U6C7D9;U6C6V9;U6C6V7;Q9TDS6;B1P8W3;R9TNV1;Q7JCZ3;Q71EK3;Q71EK1;Q71EJ7;Q3V2F9;G3EBA2;A3R3Q8…	Cytochrome b	mt-Cytb;cytb;Cytb;cytB;CYTB;Mt-Cyb	tr|Q3V2T7|Q3V2T7_MOUSE Cytochrome b (Fragment) OS=Mus musculus GN=mt-Cytb PE=2 SV=1;tr|Q5VI45|Q5VI45_MOUSE Cytochrome b (Fragment) OS=Mus musculus GN=cytb PE=4 SV=1;tr|Q9TET3|Q9TET3_MOUSE Cytochrome b (Fragment) OS=Mus musculus PE=4 SV=1;tr|C4PAV8|C4PAV8_M	48157000	14026000	0	20728000	16052000	4675500	0	72187000	17373000	0	1	1	1	9.6	9.6	9.6	10.669	0.0075483	1.3142	62183000	3	2	1	0	1	1	0	1	1	0	1	1	0
2	A0A023T672;Q9CWZ3-2;Q9CWZ3;Q9CT44	A0A023T672;Q9CWZ3-2;Q9CWZ3	RNA-binding protein 8A	RBM8;Rbm8a	tr|A0A023T672|A0A023T672_MOUSE RNA-binding protein 8A OS=Mus musculus GN=RBM8 PE=1 SV=1;sp|Q9CWZ3-2|RBM8A_MOUSE Isoform 2 of RNA-binding protein 8A OS=Mus musculus GN=Rbm8a;sp|Q9CWZ3|RBM8A_MOUSE RNA-binding protein 8A OS=Mus musculus GN=Rbm8a PE=1 SV=3	2617900000	2728000000	2634000000	997490000	327240000	341010000	329250000	2917700000	2849700000	2691600000	8	8	8	62.6	62.6	62.6	19.889	0	50.159	7979900000	55	15	21	19	8	8	7	8	8	7	8	8	7
3	A0A024QYR9;O08586;Q8BSR7;Q3UUN5;Q3UUT8	A0A024QYR9;O08586;Q8BSR7;Q3UUN5	Phosphatidylinositol 3,4,5-trisphosphate 3-phosphatase and dual-specificity protein phosphatase PTEN	Pten	tr|A0A024QYR9|A0A024QYR9_MOUSE Mitochondrial PTENalpha OS=Mus musculus GN=PTEN PE=2 SV=1;sp|O08586|PTEN_MOUSE Phosphatidylinositol 3,4,5-trisphosphate 3-phosphatase and dual-specificity protein phosphatase PTEN OS=Mus musculus GN=Pten PE=1 SV=1;tr|Q8BSR7|Q	185220000	236180000	290420000	19773000	5144900	6560500	8067300	251150000	292030000	303410000	8	8	8	15.7	15.7	15.7	64.566	0	14.99	711820000	15	5	4	6	5	4	6	5	4	6	5	4	6
4	A0A067XG52;Q99K51;Q3UKB1;B1AX58;Q3UJG9;Q3U9M7;Q3U6Z1;Q3TJX0;Q61233;Q3U6N7	A0A067XG52;Q99K51;Q3UKB1;B1AX58;Q3UJG9	Plastin-3	Pls3	tr|A0A067XG52|A0A067XG52_MOUSE Plastin-3 (Fragment) OS=Mus musculus GN=Pls3 PE=4 SV=1;sp|Q99K51|PLST_MOUSE Plastin-3 OS=Mus musculus GN=Pls3 PE=1 SV=3;tr|Q3UKB1|Q3UKB1_MOUSE Putative uncharacterized protein OS=Mus musculus GN=Pls3 PE=2 SV=1;tr|B1AX58|B1AX5	29171000000	27002000000	31909000000	2202000000	729270000	675040000	797720000	31350000000	32796000000	36458000000	41	41	38	65.8	65.8	60.3	70.642	0	254.76	88081000000	330	109	105	116	38	38	40	38	38	40	35	35	37
5	A0A067XG53;B7ZP42;O70589-3;O70589-4;O70589-5;O70589;B9EJ23;O70589-2;F6Y9I5;Q91VJ0;F6ZQR2;B1AUH5;Q3TNZ0;B1AUH6;F7CD87	A0A067XG53;B7ZP42;O70589-3;O70589-4;O70589-5;O70589;B9EJ23;O70589-2	Peripheral plasma membrane protein CASK	Cask	tr|A0A067XG53|A0A067XG53_MOUSE Peripheral plasma membrane protein CASK (Fragment) OS=Mus musculus GN=Cask PE=4 SV=1;tr|B7ZP42|B7ZP42_MOUSE Cask protein OS=Mus musculus GN=Cask PE=2 SV=1;sp|O70589-3|CSKP_MOUSE Isoform 3 of Peripheral plasma membrane protein	3440800000	3605200000	3137200000	203660000	68815000	72104000	62744000	3553600000	4442600000	3592400000	23	23	23	32	32	32	99.226	0	40.02	10183000000	61	22	25	14	17	17	14	17	17	14	17	17	14
6	A0A068BD34;Q61193;G3UZ21	A0A068BD34;Q61193	Ral guanine nucleotide dissociation stimulator-like 2	Rgl2	tr|A0A068BD34|A0A068BD34_MOUSE Ral guanine nucleotide dissociation stimulator-like 2 OS=Mus musculus GN=Rgl2 PE=2 SV=1;sp|Q61193|RGL2_MOUSE Ral guanine nucleotide dissociation stimulator-like 2 OS=Mus musculus GN=Rgl2 PE=1 SV=2	61740000	68194000	47284000	4544100	1583100	1748600	1212400	63259000	80123000	66151000	6	6	6	11.4	11.4	11.4	83.825	0	12.889	177220000	14	7	3	4	6	3	4	6	3	4	6	3	4
7	Q8VCR0;G3UXP8;A0A068BES4;A0A068BIV0;A0A068BFV6;A0A068BD65;A0A068BGV8;Q3TWJ1;A0A068BGT5;P28704-2;P28704;G3UZ09	Q8VCR0;G3UXP8;A0A068BES4;A0A068BIV0;A0A068BFV6;A0A068BD65;A0A068BGV8;Q3TWJ1;A0A068BGT5;P28704-2;P28704	Retinoic acid receptor RXR-beta	Rxrb	tr|Q8VCR0|Q8VCR0_MOUSE Retinoic acid receptor RXR-beta OS=Mus musculus GN=Rxrb PE=2 SV=1;tr|G3UXP8|G3UXP8_MOUSE Retinoic acid receptor RXR-beta (Fragment) OS=Mus musculus GN=Rxrb PE=3 SV=1;tr|A0A068BES4|A0A068BES4_MOUSE Putative retinoid X receptor beta is	37562000	19264000	64972000	5295600	1633100	837550	2824900	38942000	44604000	50299000	5	5	3	14	14	8	44.839	0	8.8175	121800000	7	3	1	3	3	1	3	3	1	3	1	0	2
8	Q5XLB0;Q5XW54;Q5XW59;G3UX50;Q5XW53;Q3U0Z3;A1A558;A0A068BEP5;Q3UKR0;Q3UIV3;O35613;Q5XW57;Q5XW58	Q5XLB0;Q5XW54;Q5XW59;G3UX50;Q5XW53;Q3U0Z3;A1A558;A0A068BEP5;Q3UKR0;Q3UIV3;O35613;Q5XW57	Death domain-associated protein 6	Daxx	tr|Q5XLB0|Q5XLB0_MOUSE Death domain-associated protein (Fragment) OS=Mus musculus GN=Daxx PE=2 SV=1;tr|Q5XW54|Q5XW54_MOUSE Death domain-associated protein (Fragment) OS=Mus musculus GN=Daxx PE=2 SV=1;tr|Q5XW59|Q5XW59_MOUSE Death-domain associated protein (	116190000	94725000	171250000	23886000	7262100	5920300	10703000	158900000	162050000	139490000	3	3	3	15.3	15.3	15.3	36.271	0	8.6215	382170000	8	3	2	3	3	2	3	3	2	3	3	2	3
9	F6QHF1;Q5D0F3;Q3TBA3;Q78E61;Q62429;Q62428;Q3U6V4;Q3U543;A0A068BER1;P21958	F6QHF1;Q5D0F3;Q3TBA3;Q78E61;Q62429;Q62428;Q3U6V4;Q3U543;A0A068BER1;P21958	Antigen peptide transporter 1	Tap1	tr|F6QHF1|F6QHF1_MOUSE Antigen peptide transporter 1 (Fragment) OS=Mus musculus GN=Tap1 PE=4 SV=1;tr|Q5D0F3|Q5D0F3_MOUSE Tap1 protein OS=Mus musculus GN=Tap1 PE=2 SV=1;tr|Q3TBA3|Q3TBA3_MOUSE Antigen peptide transporter 1 OS=Mus musculus GN=Tap1 PE=2 SV=1;t	12580000	0	0	967720	967720	0	0	21857000	0	0	1	1	1	8.7	8.7	8.7	20.85	0.0047149	1.4994	12580000	1	1	0	0	1	0	0	1	0	0	1	0	0
10	Q78ZJ8;A0A068BFR3;P46638;G3UY29;E9Q3P9;F8WGS1;G3UZD3;Q3UZ37;G3UZL4;Q9QWU0	Q78ZJ8;A0A068BFR3;P46638;G3UY29;E9Q3P9;F8WGS1;G3UZD3;Q3UZ37	Ras-related protein Rab-11B	Rab11b;Rab11a	tr|Q78ZJ8|Q78ZJ8_MOUSE MCG22989, isoform CRA_b OS=Mus musculus GN=Rab11b PE=2 SV=1;tr|A0A068BFR3|A0A068BFR3_MOUSE RAS oncogene family protein OS=Mus musculus GN=Rab11b PE=2 SV=1;sp|P46638|RB11B_MOUSE Ras-related protein Rab-11B OS=Mus musculus GN=Rab11b PE	8325400000	7461700000	8439300000	1514100000	520340000	466360000	527460000	8871500000	9922200000	9084800000	11	11	2	54.1	54.1	13.3	24.489	0	74.22	24226000000	88	31	30	27	11	11	11	11	11	11	2	2	2
11	A0A068BFS4;O35730;O35730-3;O35730-2	A0A068BFS4;O35730;O35730-3;O35730-2	E3 ubiquitin-protein ligase RING1	Ring1	tr|A0A068BFS4|A0A068BFS4_MOUSE Ring finger protein 1 OS=Mus musculus GN=Ring1 PE=2 SV=1;sp|O35730|RING1_MOUSE E3 ubiquitin-protein ligase RING1 OS=Mus musculus GN=Ring1 PE=1 SV=2;sp|O35730-3|RING1_MOUSE Isoform 3 of E3 ubiquitin-protein ligase RING1 OS=Mus	40363000	46763000	91783000	9939400	2242400	2597900	5099100	48858000	69940000	66550000	5	3	3	21.2	13.8	13.8	42.612	0	6.417	178910000	7	3	2	2	4	4	5	2	2	3	2	2	3
12	A0A068BGT0;Q8C754;Q3V3A4;G3UY33	A0A068BGT0;Q8C754;Q3V3A4;G3UY33	Vacuolar protein sorting-associated protein 52 homolog	Vps52	tr|A0A068BGT0|A0A068BGT0_MOUSE Vacuolar protein sorting 52 OS=Mus musculus GN=Vps52 PE=2 SV=1;sp|Q8C754|VPS52_MOUSE Vacuolar protein sorting-associated protein 52 homolog OS=Mus musculus GN=Vps52 PE=2 SV=1;tr|Q3V3A4|Q3V3A4_MOUSE Putative uncharacterized pr	366220000	350980000	381920000	24980000	8323300	7976900	8680100	434210000	449590000	492990000	17	17	4	36.8	36.8	11.6	82.029	0	55.254	1099100000	36	11	13	12	12	12	12	12	12	12	3	3	3
13	Q5XW51;Q5XW48;Q3U9A3;Q3TED6;Q9D679;Q91WI5;Q3TCU5;A0A068BIS1;Q9R233-2;Q9R233;Q5XW52;Q5XW49;G3UZZ2;Q5XW46;Q8C6N4;Q3U7C1;Q5XW47	Q5XW51;Q5XW48;Q3U9A3;Q3TED6;Q9D679;Q91WI5;Q3TCU5;A0A068BIS1;Q9R233-2;Q9R233;Q5XW52;Q5XW49;G3UZZ2;Q5XW46;Q8C6N4;Q3U7C1	Tapasin	Tapbp	tr|Q5XW51|Q5XW51_MOUSE Tapasin (Fragment) OS=Mus musculus GN=Tapbp PE=2 SV=1;tr|Q5XW48|Q5XW48_MOUSE Tapasin (Fragment) OS=Mus musculus GN=Tapbp PE=2 SV=1;tr|Q3U9A3|Q3U9A3_MOUSE TAP binding protein, isoform CRA_b OS=Mus musculus GN=Tapbp PE=2 SV=1;tr|Q3TED6	64477000	79197000	28990000	8633200	3223900	3959800	1449500	58058000	101640000	44381000	4	4	4	12.1	12.1	12.1	45.925	0	8.3813	172660000	7	3	2	2	4	3	3	4	3	3	4	3	3
14	Q14C53;A0A068BIT0;Q31125	Q14C53;A0A068BIT0;Q31125	Zinc transporter SLC39A7	Slc39a7	tr|Q14C53|Q14C53_MOUSE Solute carrier family 39 (Zinc transporter), member 7 OS=Mus musculus GN=Slc39a7 PE=2 SV=1;tr|A0A068BIT0|A0A068BIT0_MOUSE Solute carrier family 39 OS=Mus musculus GN=Slc39a7 PE=2 SV=1;sp|Q31125|S39A7_MOUSE Zinc transporter SLC39A7 OS	557190000	750130000	1022000000	155290000	37146000	50009000	68135000	619970000	855850000	854320000	3	3	3	7.1	7.1	7.1	50.686	0	7.5057	2329300000	12	3	4	5	2	2	3	2	2	3	2	2	3
15	A0A068EW80;Q60953;D3Z3A6;D3YXR5;Q60953-2;F7BTZ2;Q8BSJ6;D3Z2V0;O89066	A0A068EW80;Q60953;D3Z3A6;D3YXR5;Q60953-2;F7BTZ2	Protein PML	Pml	tr|A0A068EW80|A0A068EW80_MOUSE Promyelocytic leukemia OS=Mus musculus GN=Pml PE=2 SV=1;sp|Q60953|PML_MOUSE Protein PML OS=Mus musculus GN=Pml PE=1 SV=3;tr|D3Z3A6|D3Z3A6_MOUSE Protein PML OS=Mus musculus GN=Pml PE=1 SV=1;tr|D3YXR5|D3YXR5_MOUSE Protein PML O	1247600000	1515700000	1311900000	86706000	26545000	32249000	27912000	1589600000	1570500000	1379000000	19	19	19	31.9	31.9	31.9	98.241	0	71.801	4075200000	64	21	22	21	15	17	14	15	17	14	15	17	14
16	A0A068F126	A0A068F126			tr|A0A068F126|A0A068F126_MOUSE Glyco-gag polyprotein OS=Mus musculus PE=4 SV=1	14310000000	15270000000	18466000000	1715900000	511070000	545360000	659520000	16550000000	18493000000	18971000000	31	8	6	63	15	13	70.068	0	152.99	48047000000	70	24	22	24	26	27	28	7	7	8	5	5	6
17	A0AUN4;G5E837;F6T088;Q9D968	A0AUN4;G5E837;F6T088		Hcfc2	tr|A0AUN4|A0AUN4_MOUSE Hcfc2 protein (Fragment) OS=Mus musculus GN=Hcfc2 PE=2 SV=1;tr|G5E837|G5E837_MOUSE Host cell factor 2 OS=Mus musculus GN=Hcfc2 PE=4 SV=1;tr|F6T088|F6T088_MOUSE Host cell factor 2 (Fragment) OS=Mus musculus GN=Hcfc2 PE=4 SV=1	31730000	20565000	91751000	6547500	1442300	934760	4170500	44170000	42515000	55890000	3	2	2	11.5	9	9	39.554	0.0035592	1.572	144050000	6	2	1	3	2	2	3	1	1	2	1	1	2
18	A0AUV1;A3KPD0;B2RVF0;A2AB79;Q8CGP6;Q8CGP7;Q8CGP5;Q8BFU2;P22752;Q8CGP4;Q61668	A0AUV1;A3KPD0;B2RVF0;A2AB79;Q8CGP6;Q8CGP7;Q8CGP5;Q8BFU2;P22752;Q8CGP4	Histone H2A;Histone H2A type 1-H;Histone H2A type 1-K;Histone H2A type 1-F;Histone H2A type 3;Histone H2A type 1	Hist1h2ah;Hist1h2ad;Hist3h2a;Hist1h2ak;Hist1h2af;Hist1h2ab;Hist1h2aa	tr|A0AUV1|A0AUV1_MOUSE Histone H2A (Fragment) OS=Mus musculus GN=Hist1h2ah PE=2 SV=1;tr|A3KPD0|A3KPD0_MOUSE Histone H2A OS=Mus musculus GN=Hist1h2ah PE=2 SV=1;tr|B2RVF0|B2RVF0_MOUSE Histone H2A OS=Mus musculus GN=Hist1h2ad PE=2 SV=1;tr|A2AB79|A2AB79_MOUSE	34910000000	33300000000	36582000000	14970000000	4987100000	4757200000	5226000000	48539000000	59938000000	46460000000	9	9	2	64.6	64.6	5.5	13.819	0	112.33	104790000000	139	48	48	43	8	8	8	8	8	8	1	1	1
19	A0ELI5;Q8K2D3;D6RCX6;D3YYS4	A0ELI5;Q8K2D3	Enhancer of mRNA-decapping protein 3	Edc3	tr|A0ELI5|A0ELI5_MOUSE Putative uncharacterized protein OS=Mus musculus GN=Edc3 PE=4 SV=1;sp|Q8K2D3|EDC3_MOUSE Enhancer of mRNA-decapping protein 3 OS=Mus musculus GN=Edc3 PE=1 SV=1	288990000	303390000	507660000	35485000	9322200	9786800	16376000	412000000	412220000	433580000	12	12	12	37	37	37	55.957	0	28.64	1100000000	30	9	11	10	8	8	9	8	8	9	8	8	9
20	Q3UTU7;K4DI67;A0EQY3;Q6ZQK0;Q80W41	Q3UTU7;K4DI67;A0EQY3;Q6ZQK0;Q80W41	Condensin-2 complex subunit D3	Ncapd3	tr|Q3UTU7|Q3UTU7_MOUSE Putative uncharacterized protein OS=Mus musculus GN=Ncapd3 PE=2 SV=1;tr|K4DI67|K4DI67_MOUSE Condensin-2 complex subunit D3 OS=Mus musculus GN=Ncapd3 PE=4 SV=1;tr|A0EQY3|A0EQY3_MOUSE Jacobsen syndrome region 2 protein OS=Mus musculus	1047000000	676210000	812740000	32512000	13423000	8669400	10420000	1019700000	981660000	999730000	23	23	23	20.8	20.8	20.8	169.39	0	49.913	2536000000	47	14	17	16	16	17	17	16	17	17	16	17	17
21	A0JLQ7;Q8BFV2;Q8BNM3;E9Q1H5;E9Q5V9	A0JLQ7;Q8BFV2;Q8BNM3	PCI domain-containing protein 2	Pcid2	tr|A0JLQ7|A0JLQ7_MOUSE Pcid2 protein (Fragment) OS=Mus musculus GN=Pcid2 PE=2 SV=1;sp|Q8BFV2|PCID2_MOUSE PCI domain-containing protein 2 OS=Mus musculus GN=Pcid2 PE=2 SV=1;tr|Q8BNM3|Q8BNM3_MOUSE Putative uncharacterized protein OS=Mus musculus GN=Pcid2 PE=	709420000	502420000	608390000	60674000	23647000	16747000	20280000	770900000	931460000	741570000	12	12	12	35	35	35	47.018	0	50.255	1820200000	32	12	9	11	10	6	9	10	6	9	10	6	9
22	A0JLV3;B2RVD5;Q8CBB6;Q921L4;Q8CGP2;Q8CGP1;Q64475;P10853;Q8CGP2-2;A0JNS9;Q8VEE3;G3X9D5	A0JLV3;B2RVD5;Q8CBB6;Q921L4;Q8CGP2;Q8CGP1;Q64475;P10853;Q8CGP2-2;A0JNS9	Histone H2B;Histone H2B type 1-P;Histone H2B type 1-K;Histone H2B type 1-B;Histone H2B type 1-F/J/L	Hist1h2bj;Hist1h2bk;Hist1h2br;LOC665622;Hist1h2bp;Hist1h2bb;Hist1h2bf;Hist1h2ba	tr|A0JLV3|A0JLV3_MOUSE Histone H2B (Fragment) OS=Mus musculus GN=Hist1h2bj PE=2 SV=1;tr|B2RVD5|B2RVD5_MOUSE Histone H2B OS=Mus musculus GN=Hist1h2bk PE=2 SV=1;tr|Q8CBB6|Q8CBB6_MOUSE Histone H2B OS=Mus musculus GN=Hist1h2br PE=2 SV=1;tr|Q921L4|Q921L4_MOUSE	160500000000	173790000000	116940000000	45123000000	16050000000	17379000000	11694000000	221270000000	218170000000	152940000000	9	9	0	59.3	59.3	0	13.579	0	109.86	451230000000	337	114	117	106	9	9	9	9	9	9	0	0	0
23	A0JNY3;Q8BUV3;Q571C2	A0JNY3;Q8BUV3	Gephyrin;Molybdopterin adenylyltransferase;Molybdopterin molybdenumtransferase	Gphn	tr|A0JNY3|A0JNY3_MOUSE Gephyrin OS=Mus musculus GN=Gphn PE=1 SV=1;sp|Q8BUV3|GEPH_MOUSE Gephyrin OS=Mus musculus GN=Gphn PE=1 SV=2	647740000	719490000	474780000	39192000	13782000	15308000	10102000	644560000	761160000	641110000	15	15	15	29.1	29.1	29.1	83.665	0	35.732	1842000000	30	12	8	10	9	9	9	9	9	9	9	9	9
24	A0JNY7;G3XA17;Q62448;F7CBP1;Q62448-2;Q3U9U9;Q3URI0;F6TW20;F7DAB1;F6UU81;F7CHS2	A0JNY7;G3XA17;Q62448;F7CBP1;Q62448-2;Q3U9U9	Eukaryotic translation initiation factor 4 gamma 2	Eif4g2	tr|A0JNY7|A0JNY7_MOUSE Eukaryotic translation initiation factor 4, gamma 2 OS=Mus musculus GN=Eif4g2 PE=2 SV=1;tr|G3XA17|G3XA17_MOUSE Eukaryotic translation initiation factor 4 gamma 2 OS=Mus musculus GN=Eif4g2 PE=1 SV=1;sp|Q62448|IF4G2_MOUSE Eukaryotic tr	8417000000	8031200000	9042500000	455190000	150300000	143410000	161470000	9671900000	10145000000	10142000000	43	43	43	52.8	52.8	52.8	102.13	0	185.04	25491000000	225	79	77	69	36	40	38	36	40	38	36	40	38
25	A0JP53;D3YXJ0	A0JP53;D3YXJ0	Diacylglycerol kinase	Dgkh	tr|A0JP53|A0JP53_MOUSE Diacylglycerol kinase OS=Mus musculus GN=Dgkh PE=2 SV=1;tr|D3YXJ0|D3YXJ0_MOUSE Diacylglycerol kinase OS=Mus musculus GN=Dgkh PE=3 SV=1	18944000	117070000	12503000	2475200	315740	1951100	208390	23229000	0	26221000	2	2	1	2.9	2.9	1.3	119.87	0.00016987	3.5942	148510000	3	1	1	1	1	1	1	1	1	1	0	1	0
26	A0MNP4;Q9ERF3;Q8BVQ0;D6RDC7;D6RJ72;Q8BKW0	A0MNP4;Q9ERF3;Q8BVQ0;D6RDC7;D6RJ72	WD repeat-containing protein 61;WD repeat-containing protein 61, N-terminally processed	Wdr61	tr|A0MNP4|A0MNP4_MOUSE CDW13/WDR61 OS=Mus musculus GN=Wdr61 PE=2 SV=1;sp|Q9ERF3|WDR61_MOUSE WD repeat-containing protein 61 OS=Mus musculus GN=Wdr61 PE=2 SV=1;tr|Q8BVQ0|Q8BVQ0_MOUSE WD repeat-containing protein 61 OS=Mus musculus GN=Wdr61 PE=2 SV=1;tr|D6RD	1576000000	1847600000	2009100000	362180000	105070000	123170000	133940000	2283600000	1948300000	2266500000	12	12	12	56.7	56.7	56.7	33.772	0	57.106	5432700000	73	21	25	27	12	12	11	12	12	11	12	12	11
27	A0PJ89;Q810V0;Q9D7V6;Q9CYN7;Q8K0Z2	A0PJ89;Q810V0;Q9D7V6	U3 small nucleolar ribonucleoprotein protein MPP10	Mphosph10	tr|A0PJ89|A0PJ89_MOUSE Mphosph10 protein (Fragment) OS=Mus musculus GN=Mphosph10 PE=2 SV=1;sp|Q810V0|MPP10_MOUSE U3 small nucleolar ribonucleoprotein protein MPP10 OS=Mus musculus GN=Mphosph10 PE=1 SV=2;tr|Q9D7V6|Q9D7V6_MOUSE Putative uncharacterized prote	582480000	689870000	688080000	78417000	23299000	27595000	27523000	800600000	735020000	718730000	10	10	10	28.6	28.6	28.6	68.735	0	35.549	1960400000	33	9	13	11	6	8	8	6	8	8	6	8	8
28	A0PJC8;A2A3Z2;A2A3Z3;Q8BN78	A0PJC8;A2A3Z2;A2A3Z3;Q8BN78	Transcriptional regulator Kaiso	Zbtb33	tr|A0PJC8|A0PJC8_MOUSE Zbtb33 protein (Fragment) OS=Mus musculus GN=Zbtb33 PE=2 SV=1;tr|A2A3Z2|A2A3Z2_MOUSE Transcriptional regulator Kaiso (Fragment) OS=Mus musculus GN=Zbtb33 PE=4 SV=1;tr|A2A3Z3|A2A3Z3_MOUSE Zinc finger and BTB domain containing 33 OS=Mu	0	12749000	30299000	1594400	0	472180	1122200	0	33319000	21157000	2	2	2	5.6	5.6	5.6	61.007	0	4.8361	43048000	3	0	1	2	0	1	2	0	1	2	0	1	2
29	A0PK78;Q78PG9	A0PK78;Q78PG9	Coiled-coil domain-containing protein 25	Ccdc25	tr|A0PK78|A0PK78_MOUSE Coiled-coil domain containing 25 OS=Mus musculus GN=Ccdc25 PE=2 SV=1;sp|Q78PG9|CCD25_MOUSE Coiled-coil domain-containing protein 25 OS=Mus musculus GN=Ccdc25 PE=1 SV=1	166300000	77467000	159760000	25221000	10394000	4841700	9985100	142390000	136040000	172720000	5	5	5	28.8	28.8	28.8	24.48	0	8.1161	403530000	15	7	2	6	4	2	5	4	2	5	4	2	5
30	E9PYF4;A0T1J8;F6VG99;Q6ZQ32;E9PYI7;Q3UPW3;E0CZD8	E9PYF4;A0T1J8;F6VG99;Q6ZQ32;E9PYI7		Lmo7	tr|E9PYF4|E9PYF4_MOUSE Protein Lmo7 OS=Mus musculus GN=Lmo7 PE=1 SV=1;tr|A0T1J8|A0T1J8_MOUSE LIM domain only 7 OS=Mus musculus GN=Lmo7 PE=2 SV=1;tr|F6VG99|F6VG99_MOUSE Protein Lmo7 (Fragment) OS=Mus musculus GN=Lmo7 PE=1 SV=1;tr|Q6ZQ32|Q6ZQ32_MOUSE MKIAA08	1903300000	1872800000	2291200000	52304000	16408000	16144000	19752000	2342000000	2407200000	2299800000	32	32	8	27.5	27.5	6.2	192.55	0	113	6067200000	103	32	36	35	22	25	27	22	25	27	3	5	5
31	A2A8Y5;A0ZV96;Q8BHW2	A2A8Y5;A0ZV96;Q8BHW2	Protein OSCP1	Oscp1	tr|A2A8Y5|A2A8Y5_MOUSE Organic solute carrier 1 (Fragment) OS=Mus musculus GN=Oscp1 PE=2 SV=1;tr|A0ZV96|A0ZV96_MOUSE Organic solute carrier protein 1 isoform OS=Mus musculus GN=Oscp1 PE=2 SV=1;sp|Q8BHW2|OSCP1_MOUSE Protein OSCP1 OS=Mus musculus GN=Oscp1 PE	139980000	79504000	75656000	9838100	4666100	2650100	2521900	158540000	85022000	135420000	6	6	6	22.4	22.4	22.4	43.231	0	11.27	295140000	10	5	2	3	5	1	3	5	1	3	5	1	3
32	A1A4T2;Q8BHN3-2;Q3UE86;Q8BHN3-3;Q9R1N7;REV__D6REU9;REV__Q5ERC7;REV__B9EHN5;REV__B7ZNE4;REV__Q7TSP0;REV__Q3T9X0	A1A4T2;Q8BHN3-2;Q3UE86;Q8BHN3-3	Neutral alpha-glucosidase AB	Ganab	tr|A1A4T2|A1A4T2_MOUSE Alpha glucosidase 2 alpha neutral subunit OS=Mus musculus GN=Ganab PE=2 SV=1;sp|Q8BHN3-2|GANAB_MOUSE Isoform 2 of Neutral alpha-glucosidase AB OS=Mus musculus GN=Ganab;tr|Q3UE86|Q3UE86_MOUSE Putative uncharacterized protein (Fragment	36110000000	31551000000	35988000000	1787100000	622580000	543990000	620480000	39180000000	41111000000	40884000000	45	45	1	51.8	51.8	1.1	109.4	0	286.34	103650000000	504	172	159	173	42	42	42	42	42	42	1	1	1
33	Q3UG53;A1A553;Q5DTS2;O55098	Q3UG53;A1A553;Q5DTS2;O55098	Serine/threonine-protein kinase 10	Stk10	tr|Q3UG53|Q3UG53_MOUSE Putative uncharacterized protein OS=Mus musculus GN=Stk10 PE=2 SV=1;tr|A1A553|A1A553_MOUSE Serine/threonine kinase 10 OS=Mus musculus GN=Stk10 PE=2 SV=1;tr|Q5DTS2|Q5DTS2_MOUSE MKIAA4026 protein (Fragment) OS=Mus musculus GN=Stk10 PE=	46448000	85834000	60259000	3632800	876380	1619500	1137000	80449000	78391000	107330000	5	4	4	5.2	4.2	4.2	111.84	0	4.5536	192540000	4	1	1	2	2	4	3	1	3	2	1	3	2
34	A1A596;Q8R538;Q2M1K2;Q8BU03;Q8K2C4	A1A596;Q8R538;Q2M1K2;Q8BU03	Periodic tryptophan protein 2 homolog	Pwp2	tr|A1A596|A1A596_MOUSE Pwp2 protein OS=Mus musculus GN=Pwp2 PE=2 SV=1;tr|Q8R538|Q8R538_MOUSE WD-repeat protein p103 OS=Mus musculus GN=Pwp2 PE=2 SV=1;tr|Q2M1K2|Q2M1K2_MOUSE MCG115350 OS=Mus musculus GN=Pwp2 PE=2 SV=1;sp|Q8BU03|PWP2_MOUSE Periodic tryptopha	835310000	810470000	594970000	52110000	19426000	18848000	13836000	779560000	1025800000	891140000	18	18	18	30	30	30	98.57	0	27.823	2240700000	54	22	17	15	16	13	13	16	13	13	16	13	13
35	A2BD48;A2VCT6;E9PWX7;A1A5B6;S4R2S6	A2BD48;A2VCT6;E9PWX7;A1A5B6;S4R2S6	TBC1 domain family member 25	Tbc1d25	tr|A2BD48|A2BD48_MOUSE Tbc1d25 protein (Fragment) OS=Mus musculus GN=Tbc1d25 PE=2 SV=1;tr|A2VCT6|A2VCT6_MOUSE Tbc1d25 protein (Fragment) OS=Mus musculus GN=Tbc1d25 PE=2 SV=1;tr|E9PWX7|E9PWX7_MOUSE TBC1 domain family member 25 OS=Mus musculus GN=Tbc1d25 PE=	24283000	8294600	12153000	1397800	758840	259210	379790	21592000	18920000	0	3	3	3	6.7	6.7	6.7	79.571	0.00017203	3.8721	44731000	4	2	1	1	2	1	1	2	1	1	2	1	1
36	A1BN54;Q9CTH3;Q3UYE4	A1BN54		Actn1	tr|A1BN54|A1BN54_MOUSE Alpha actinin 1a OS=Mus musculus GN=Actn1 PE=2 SV=1	0	0	0	0	0	0	0	0	0	0	60	1	1	73.6	1.9	1.9	102.72	0.0016869	2.143	0	1	0	0	1	54	54	56	0	0	1	0	0	1
37	A1E5T5;P51807;Q9DAS3;Q9CT63;Q5EBK8	A1E5T5;P51807;Q9DAS3;Q9CT63;Q5EBK8	Dynein light chain Tctex-type 1	Dynlt1	tr|A1E5T5|A1E5T5_MOUSE Tctex-1 OS=Mus musculus PE=2 SV=1;sp|P51807|DYLT1_MOUSE Dynein light chain Tctex-type 1 OS=Mus musculus GN=Dynlt1 PE=1 SV=1;tr|Q9DAS3|Q9DAS3_MOUSE Putative uncharacterized protein OS=Mus musculus PE=2 SV=1;tr|Q9CT63|Q9CT63_MOUSE Puta	671630000	360550000	693250000	287570000	111940000	60091000	115540000	847360000	384310000	524940000	4	4	4	60.2	60.2	60.2	12.482	0	44.891	1725400000	15	4	5	6	3	4	4	3	4	4	3	4	4
38	A1ILG8;Q8BX70-3;Q8BX70;Q8BX70-2;A1ILH3;A1ILH1;A1ILH0;A1ILG9;A1ILH2	A1ILG8;Q8BX70-3;Q8BX70;Q8BX70-2	Vacuolar protein sorting-associated protein 13C	Vps13c	tr|A1ILG8|A1ILG8_MOUSE Chorein OS=Mus musculus GN=Vps13c PE=2 SV=1;sp|Q8BX70-3|VP13C_MOUSE Isoform 3 of Vacuolar protein sorting-associated protein 13C OS=Mus musculus GN=Vps13c;sp|Q8BX70|VP13C_MOUSE Vacuolar protein sorting-associated protein 13C OS=Mus m	1862200000	1748400000	2019100000	25824000	8542300	8020100	9262100	2054600000	2236300000	2105500000	62	62	62	23.6	23.6	23.6	420.08	0	119.72	5629700000	133	46	42	45	42	40	40	42	40	40	42	40	40
39	A1L013;Q9CS00	A1L013;Q9CS00	Cactin	Cactin	tr|A1L013|A1L013_MOUSE Cactin OS=Mus musculus GN=Cactin PE=2 SV=1;sp|Q9CS00|CATIN_MOUSE Cactin OS=Mus musculus GN=Cactin PE=1 SV=2	180940000	64809000	24809000	7515600	5026200	1800200	689130	150270000	65403000	101720000	6	6	6	11.7	11.7	11.7	90.66	0.00017206	3.8724	270560000	7	4	2	1	5	3	1	5	3	1	5	3	1
40	A1L0U3;B9EI85;P84228;F8WI35;E0CYN1;E0CYR7	A1L0U3;B9EI85;P84228;F8WI35	Histone H3;Histone H3.2	Hist1h3e;Hist2h3b;Hist1h3b;H3f3a	tr|A1L0U3|A1L0U3_MOUSE Histone H3 (Fragment) OS=Mus musculus GN=Hist1h3e PE=2 SV=1;tr|B9EI85|B9EI85_MOUSE Histone H3 OS=Mus musculus GN=Hist2h3b PE=2 SV=1;sp|P84228|H32_MOUSE Histone H3.2 OS=Mus musculus GN=Hist1h3b PE=1 SV=2;tr|F8WI35|F8WI35_MOUSE Histone	72413000000	67153000000	78539000000	36351000000	12069000000	11192000000	13090000000	66524000000	68608000000	65758000000	9	9	1	60.9	60.9	24.1	15.029	0	62.218	218110000000	361	125	126	110	8	8	7	8	8	7	1	1	1
41	A1L0U6;A2AS98;P28660;P28660-2;Q3UDY0;Q8K1X4	A1L0U6;A2AS98;P28660;P28660-2	Nck-associated protein 1	Nckap1	tr|A1L0U6|A1L0U6_MOUSE Nckap1 protein (Fragment) OS=Mus musculus GN=Nckap1 PE=2 SV=1;tr|A2AS98|A2AS98_MOUSE Nck-associated protein 1 OS=Mus musculus GN=Nckap1 PE=4 SV=1;sp|P28660|NCKP1_MOUSE Nck-associated protein 1 OS=Mus musculus GN=Nckap1 PE=1 SV=2;sp|P	5454800000	3910200000	5124000000	222910000	83919000	60157000	78831000	5935400000	5412300000	5794300000	40	40	40	42.5	42.5	42.5	129.38	0	152.22	14489000000	157	54	46	57	36	33	34	36	33	34	36	33	34
42	A1L0V4;P68433	A1L0V4;P68433	Histone H3;Histone H3.1	Hist1h3i;Hist1h3a	tr|A1L0V4|A1L0V4_MOUSE Histone H3 (Fragment) OS=Mus musculus GN=Hist1h3i PE=2 SV=1;sp|P68433|H31_MOUSE Histone H3.1 OS=Mus musculus GN=Hist1h3a PE=1 SV=2	0	0	0	0	0	0	0	0	0	0	9	1	1	60	23.7	23.7	15.273	0	48.811	0	0	0	0	0	8	8	7	1	1	1	1	1	1
43	A1L0V6;A7YY79;Q6Q899;A2AP29;Q3U1I9;Q3KQQ7;Q05CC6;Q6Q899-2;Q8C6Y8;Q6Q899-3;Q6Q899-4	A1L0V6;A7YY79;Q6Q899;A2AP29;Q3U1I9;Q3KQQ7;Q05CC6;Q6Q899-2	Probable ATP-dependent RNA helicase DDX58	Ddx58	tr|A1L0V6|A1L0V6_MOUSE Ddx58 protein (Fragment) OS=Mus musculus GN=Ddx58 PE=2 SV=1;tr|A7YY79|A7YY79_MOUSE Ddx58 protein (Fragment) OS=Mus musculus GN=Ddx58 PE=2 SV=1;sp|Q6Q899|DDX58_MOUSE Probable ATP-dependent RNA helicase DDX58 OS=Mus musculus GN=Ddx58 P	536240000	524360000	559550000	31157000	10312000	10084000	10760000	630430000	772020000	782070000	15	15	15	17.9	17.9	17.9	105.68	0	22.794	1620100000	39	13	14	12	10	12	9	10	12	9	10	12	9
44	A1L2Z0;Q920F6;Q8BZI2;Q6WIZ7	A1L2Z0;Q920F6	Structural maintenance of chromosomes protein;Structural maintenance of chromosomes protein 1B	Smc1b	tr|A1L2Z0|A1L2Z0_MOUSE Structural maintenance of chromosomes protein OS=Mus musculus GN=Smc1b PE=2 SV=1;sp|Q920F6|SMC1B_MOUSE Structural maintenance of chromosomes protein 1B OS=Mus musculus GN=Smc1b PE=1 SV=1	196800000	183450000	236390000	7341000	2342800	2184000	2814200	271790000	220090000	191420000	3	3	3	2	2	2	144.51	0.00031969	2.6829	616640000	12	4	3	5	2	2	3	2	2	3	2	2	3
45	Q05BC8;A2A4N5;Q6ZQK3;A2A4N8;A2A4N7;K3W4P1;A1L329;P97432;F6S397;Q91ZQ8	Q05BC8;A2A4N5;Q6ZQK3;A2A4N8;A2A4N7;K3W4P1;A1L329;P97432;F6S397;Q91ZQ8	Next to BRCA1 gene 1 protein	Nbr1	tr|Q05BC8|Q05BC8_MOUSE Nbr1 protein OS=Mus musculus GN=Nbr1 PE=2 SV=1;tr|A2A4N5|A2A4N5_MOUSE Next to BRCA1 gene 1 protein OS=Mus musculus GN=Nbr1 PE=4 SV=1;tr|Q6ZQK3|Q6ZQK3_MOUSE MKIAA0049 protein (Fragment) OS=Mus musculus GN=Nbr1 PE=2 SV=1;tr|A2A4N8|A2A4	75812000	150150000	217730000	13445000	2297300	4549900	6598000	135370000	179410000	176570000	7	7	7	14	14	14	98.815	0	15.903	443690000	12	3	4	5	3	5	5	3	5	5	3	5	5
46	Q52KQ7;A1L332;F6WYQ5;Q5DTG0;P70704-3;P70704-2;P70704;Q8CA15;Q3TRP7	Q52KQ7;A1L332;F6WYQ5;Q5DTG0;P70704-3;P70704-2;P70704;Q8CA15	Phospholipid-transporting ATPase;Phospholipid-transporting ATPase IA	Atp8a1	tr|Q52KQ7|Q52KQ7_MOUSE Atp8a1 protein (Fragment) OS=Mus musculus GN=Atp8a1 PE=2 SV=1;tr|A1L332|A1L332_MOUSE Atp8a1 protein OS=Mus musculus GN=Atp8a1 PE=2 SV=1;tr|F6WYQ5|F6WYQ5_MOUSE Phospholipid-transporting ATPase IA (Fragment) OS=Mus musculus GN=Atp8a1 P	235020000	9365500	12319000	6112000	5595700	222990	293300	240750000	34626000	43433000	5	5	5	7.9	7.9	7.9	91.069	0	4.4779	256700000	6	4	1	1	5	1	1	5	1	1	5	1	1
47	A1L333;Q9CSD9;B1ARB8;S4R1E3;Q921Y3	A1L333		Ddx5	tr|A1L333|A1L333_MOUSE DEAD (Asp-Glu-Ala-Asp) box polypeptide 5 OS=Mus musculus GN=Ddx5 PE=2 SV=1	28665000	0	0	796260	796260	0	0	37018000	0	0	33	1	1	53.5	2.6	2.6	69.279	1	-2	28665000	1	1	0	0	31	31	31	1	0	0	1	0	0
48	Q91ZZ2;A1L338;Q3UGX8;Q3UHC1;Q8C5V7;F6ZDE5;E0CXV1	Q91ZZ2;A1L338;Q3UGX8;Q3UHC1;Q8C5V7;F6ZDE5;E0CXV1		Rapgef1	tr|Q91ZZ2|Q91ZZ2_MOUSE Guanine nucleotide exchange factor OS=Mus musculus GN=Rapgef1 PE=1 SV=1;tr|A1L338|A1L338_MOUSE Rapgef1 protein OS=Mus musculus GN=Rapgef1 PE=2 SV=1;tr|Q3UGX8|Q3UGX8_MOUSE Protein Rapgef1 OS=Mus musculus GN=Rapgef1 PE=1 SV=1;tr|Q3UHC1	78823000	70104000	79954000	4087200	1407600	1251900	1427800	77256000	89976000	82861000	4	4	4	4.1	4.1	4.1	121.92	0	21.205	228880000	10	3	3	4	3	3	4	3	3	4	3	3	4
49	A1L341;A9C475;Q61214;Q8K006;Q8C774;A9C478;Q9Z188-2;Q9Z188;Q9Z188-3;Q80ZK5;Q61158;A9C477	A1L341;A9C475;Q61214;Q8K006;Q8C774	Dual specificity tyrosine-phosphorylation-regulated kinase 1A	Dyrk1a	tr|A1L341|A1L341_MOUSE Dual-specificity tyrosine-phosphorylation-regulated kinase 1A OS=Mus musculus GN=Dyrk1a PE=1 SV=1;tr|A9C475|A9C475_MOUSE Dual-specificity tyrosine-(Y)-phosphorylation regulated kinase 1a OS=Mus musculus GN=Dyrk1a PE=2 SV=1;sp|Q61214|	310280000	382850000	350750000	32621000	9696200	11964000	10961000	403740000	513860000	486740000	10	10	10	15.6	15.6	15.6	84.466	0	15.867	1043900000	23	7	9	7	8	7	8	8	7	8	8	7	8
50	B2CSK2;A1L347;P16627;Q9QWU1;Q9R2A1	B2CSK2;A1L347;P16627;Q9QWU1	Heat shock 70 kDa protein 1-like	Hspa1l	tr|B2CSK2|B2CSK2_MOUSE Heat shock protein 1-like protein OS=Mus musculus PE=3 SV=1;tr|A1L347|A1L347_MOUSE Heat shock protein 1-like OS=Mus musculus GN=Hspa1l PE=2 SV=1;sp|P16627|HS71L_MOUSE Heat shock 70 kDa protein 1-like OS=Mus musculus GN=Hspa1l PE=2 SV	77404000	91066000	108120000	6914800	1935100	2276600	2703000	91721000	98856000	82040000	15	2	2	24	2.5	2.5	70.606	0.0019775	2.0483	276590000	4	1	1	2	13	13	12	2	1	2	2	1	2
51	A1L361;Q9WUN2;Q3THP3	A1L361;Q9WUN2;Q3THP3	Serine/threonine-protein kinase TBK1	Tbk1	tr|A1L361|A1L361_MOUSE TANK-binding kinase 1 OS=Mus musculus GN=Tbk1 PE=2 SV=1;sp|Q9WUN2|TBK1_MOUSE Serine/threonine-protein kinase TBK1 OS=Mus musculus GN=Tbk1 PE=1 SV=1;tr|Q3THP3|Q3THP3_MOUSE Putative uncharacterized protein OS=Mus musculus GN=Tbk1 PE=2	123080000	304680000	276400000	16004000	2797200	6924600	6281800	254880000	267320000	273520000	13	13	13	23.7	23.7	23.7	83.424	0	18.669	704160000	21	7	7	7	6	8	7	6	8	7	6	8	7
52	A1L367;A1L366;Q61550;Q3TG35;Q3UTE4;Q6ZQJ6;R4GML2;A2AU37	A1L367;A1L366;Q61550;Q3TG35;Q3UTE4;Q6ZQJ6	Double-strand-break repair protein rad21 homolog	Rad21	tr|A1L367|A1L367_MOUSE RAD21 homolog (S. pombe) OS=Mus musculus GN=Rad21 PE=2 SV=1;tr|A1L366|A1L366_MOUSE RAD21 homolog (S. pombe) OS=Mus musculus GN=Rad21 PE=2 SV=1;sp|Q61550|RAD21_MOUSE Double-strand-break repair protein rad21 homolog OS=Mus musculus GN=	2766400000	2058000000	2135700000	267690000	106400000	79153000	82142000	2755200000	3100000000	2799700000	25	25	25	49.4	49.4	49.4	72.022	0	132.38	6960000000	102	34	31	37	22	18	20	22	18	20	22	18	20
53	A1L3B6;Q9D7Z3;Q9D7Z3-2	A1L3B6;Q9D7Z3;Q9D7Z3-2	Nucleolar protein 7	Nol7	tr|A1L3B6|A1L3B6_MOUSE Nol7 protein OS=Mus musculus GN=Nol7 PE=2 SV=1;sp|Q9D7Z3|NOL7_MOUSE Nucleolar protein 7 OS=Mus musculus GN=Nol7 PE=1 SV=1;sp|Q9D7Z3-2|NOL7_MOUSE Isoform 2 of Nucleolar protein 7 OS=Mus musculus GN=Nol7	221540000	150530000	150160000	65278000	27692000	18816000	18771000	236850000	202480000	237860000	5	5	5	22	22	22	28.97	0	5.6218	522230000	12	4	4	4	5	3	4	5	3	4	5	3	4
54	A1L3B8;P26516	A1L3B8;P26516	26S proteasome non-ATPase regulatory subunit 7	Psmd7	tr|A1L3B8|A1L3B8_MOUSE Proteasome (Prosome, macropain) 26S subunit, non-ATPase, 7 OS=Mus musculus GN=Psmd7 PE=2 SV=1;sp|P26516|PSMD7_MOUSE 26S proteasome non-ATPase regulatory subunit 7 OS=Mus musculus GN=Psmd7 PE=1 SV=2	4139900000	4533300000	4734400000	893840000	275990000	302220000	315630000	4637200000	4748500000	4742600000	13	13	13	52	52	52	36.539	0	110.67	13408000000	101	31	32	38	13	13	13	13	13	13	13	13	13
55	Q80U52;A1L3P4;B0QZV3;Q8BTG0;D3Z0Q9	Q80U52;A1L3P4;B0QZV3;Q8BTG0	Sodium/hydrogen exchanger	Slc9a6	tr|Q80U52|Q80U52_MOUSE Sodium/hydrogen exchanger (Fragment) OS=Mus musculus GN=Slc9a6 PE=2 SV=1;tr|A1L3P4|A1L3P4_MOUSE Sodium/hydrogen exchanger OS=Mus musculus GN=Slc9a6 PE=1 SV=1;tr|B0QZV3|B0QZV3_MOUSE Sodium/hydrogen exchanger OS=Mus musculus GN=Slc9a6	8941600	10221000	44393000	2888900	406440	464600	2017900	16415000	20990000	29473000	3	3	3	5.4	5.4	5.4	77.75	0.00017289	3.932	63556000	5	1	1	3	1	1	3	1	1	3	1	1	3
56	A1L3S7;Q8VHR5;Q8VHR5-2;Q69ZQ5;Q6PAH8	A1L3S7;Q8VHR5;Q8VHR5-2;Q69ZQ5	Transcriptional repressor p66-beta	Gatad2b	tr|A1L3S7|A1L3S7_MOUSE Gatad2b protein OS=Mus musculus GN=Gatad2b PE=2 SV=1;sp|Q8VHR5|P66B_MOUSE Transcriptional repressor p66-beta OS=Mus musculus GN=Gatad2b PE=1 SV=1;sp|Q8VHR5-2|P66B_MOUSE Isoform 2 of Transcriptional repressor p66-beta OS=Mus musculus	2987500000	2010600000	2958300000	221010000	82985000	55851000	82175000	3241400000	3026400000	3501800000	18	17	17	42.6	40.8	40.8	63.638	0	66.67	7956400000	79	31	24	24	16	11	12	15	11	12	15	11	12
57	Q3URR4;Q9EQ08;Q9EQ07;A1L3T3;Q9JHK6	Q3URR4;Q9EQ08;Q9EQ07;A1L3T3;Q9JHK6		Sgsh	tr|Q3URR4|Q3URR4_MOUSE Putative uncharacterized protein (Fragment) OS=Mus musculus GN=Sgsh PE=2 SV=1;tr|Q9EQ08|Q9EQ08_MOUSE Heparan N-sulfatase OS=Mus musculus GN=Sgsh PE=2 SV=1;tr|Q9EQ07|Q9EQ07_MOUSE Mutant heparan N-sulfatase OS=Mus musculus GN=Sgsh PE=2	4145100	46468000	47371000	4082700	172710	1936200	1973800	0	48451000	45924000	2	2	2	7.7	7.7	7.7	55.805	0	5.9093	97984000	3	1	1	1	1	1	1	1	1	1	1	1	1
58	A2A432;E9PXY1;A2A432-2;J3QJX0;Q3TP81	A2A432;E9PXY1;A2A432-2;J3QJX0	Cullin-4B	Cul4b	sp|A2A432|CUL4B_MOUSE Cullin-4B OS=Mus musculus GN=Cul4b PE=1 SV=1;tr|E9PXY1|E9PXY1_MOUSE Cullin-4B OS=Mus musculus GN=Cul4b PE=1 SV=2;sp|A2A432-2|CUL4B_MOUSE Isoform 2 of Cullin-4B OS=Mus musculus GN=Cul4b;tr|J3QJX0|J3QJX0_MOUSE Cullin-4B OS=Mus musculus	6130300000	4765400000	5421000000	254950000	95786000	74460000	84703000	6028400000	6501100000	6653900000	43	43	30	49.6	49.6	37.9	110.7	0	191.36	16317000000	191	65	65	61	35	34	34	35	34	34	22	24	22
59	A5D6Q2;B2RUJ1;A2A468;Q3UQL7;Q05BA5;O09000;Q3UV84	A5D6Q2;B2RUJ1;A2A468;Q3UQL7;Q05BA5;O09000	Nuclear receptor coactivator 3	Ncoa3	tr|A5D6Q2|A5D6Q2_MOUSE Ncoa3 protein (Fragment) OS=Mus musculus GN=Ncoa3 PE=2 SV=1;tr|B2RUJ1|B2RUJ1_MOUSE Ncoa3 protein OS=Mus musculus GN=Ncoa3 PE=2 SV=1;tr|A2A468|A2A468_MOUSE Nuclear receptor coactivator 3 OS=Mus musculus GN=Ncoa3 PE=1 SV=1;tr|Q3UQL7|Q3	16278000	91853000	102000000	3335400	258380	1458000	1619100	60751000	73038000	85822000	5	5	5	5.5	5.5	5.5	146.4	0	9.894	210130000	8	1	4	3	1	3	4	1	3	4	1	3	4
60	A2A483;E9Q8D1;Q3UH28;Q3V1I9;A2A484;Q8CHB3;A2A482;Q80XT8;A2A481;A2A480;Q6P4S7;Q3V437;A2A486	A2A483;E9Q8D1;Q3UH28;Q3V1I9;A2A484;Q8CHB3;A2A482;Q80XT8		Zmynd8	tr|A2A483|A2A483_MOUSE Protein Zmynd8 OS=Mus musculus GN=Zmynd8 PE=1 SV=1;tr|E9Q8D1|E9Q8D1_MOUSE Protein Zmynd8 OS=Mus musculus GN=Zmynd8 PE=1 SV=2;tr|Q3UH28|Q3UH28_MOUSE Protein Zmynd8 OS=Mus musculus GN=Zmynd8 PE=1 SV=1;tr|Q3V1I9|Q3V1I9_MOUSE Putative un	54795000	23788000	32211000	1517700	750620	325870	441240	45166000	26241000	53987000	28	1	0	34.3	1.4	0	130.19	0.00016753	3.3139	110790000	3	1	1	1	18	21	23	1	1	1	0	0	0
61	A2A4A1;Q91ZF0;F7CGC9	A2A4A1;Q91ZF0	DnaJ homolog subfamily C member 24	Dnajc24	tr|A2A4A1|A2A4A1_MOUSE DnaJ homolog subfamily C member 24 OS=Mus musculus GN=Dnajc24 PE=4 SV=1;sp|Q91ZF0|DJC24_MOUSE DnaJ homolog subfamily C member 24 OS=Mus musculus GN=Dnajc24 PE=1 SV=3	66353000	102290000	111680000	28033000	6635300	10229000	11168000	102340000	152480000	101470000	3	3	3	17.6	17.6	17.6	16.922	0.003418	1.6314	280330000	3	1	1	1	1	3	2	1	3	2	1	3	2
62	A2A4A6;Q62077;Q2M4I9;Q3UZ68;G3UXP4;F6SLL0;Q3TUJ5;G3V016	A2A4A6;Q62077;Q2M4I9;Q3UZ68	Phosphoinositide phospholipase C;1-phosphatidylinositol 4,5-bisphosphate phosphodiesterase gamma-1	Plcg1	tr|A2A4A6|A2A4A6_MOUSE Phosphoinositide phospholipase C OS=Mus musculus GN=Plcg1 PE=1 SV=1;sp|Q62077|PLCG1_MOUSE 1-phosphatidylinositol 4,5-bisphosphate phosphodiesterase gamma-1 OS=Mus musculus GN=Plcg1 PE=1 SV=2;tr|Q2M4I9|Q2M4I9_MOUSE Phosphoinositide ph	788820000	900640000	1029000000	38835000	11269000	12866000	14699000	1114100000	1205700000	1110300000	22	22	22	23.4	23.4	23.4	148.53	0	55.834	2718400000	55	17	18	20	13	16	16	13	16	16	13	16	16
63	Q3UQQ4;Q5DTN5;A2A4P0;A2A4N9;Q3TUC8;Q3U580;Q8R214	Q3UQQ4;Q5DTN5;A2A4P0;A2A4N9	ATP-dependent RNA helicase DHX8	Dhx8	tr|Q3UQQ4|Q3UQQ4_MOUSE Putative uncharacterized protein OS=Mus musculus GN=Dhx8 PE=2 SV=1;tr|Q5DTN5|Q5DTN5_MOUSE MKIAA4096 protein (Fragment) OS=Mus musculus GN=Dhx8 PE=2 SV=1;sp|A2A4P0|DHX8_MOUSE ATP-dependent RNA helicase DHX8 OS=Mus musculus GN=Dhx8 PE=	306020000	338680000	626800000	18698000	4500300	4980600	9217600	473540000	496030000	519560000	15	15	15	16.2	16.2	16.2	142.55	0	22.511	1271500000	32	11	11	10	10	10	10	10	10	10	10	10	10
64	Q8CGF0;A2A4U6;Q8K379;Q8R0W4	Q8CGF0;A2A4U6;Q8K379;Q8R0W4		Zfp334	tr|Q8CGF0|Q8CGF0_MOUSE Zinc finger protein 334 OS=Mus musculus GN=Zfp334 PE=2 SV=1;tr|A2A4U6|A2A4U6_MOUSE Protein Zfp334 OS=Mus musculus GN=Zfp334 PE=4 SV=1;tr|Q8K379|Q8K379_MOUSE Zfp334 protein (Fragment) OS=Mus musculus GN=Zfp334 PE=2 SV=1;tr|Q8R0W4|Q8R0	7118600	9277500	5443000	436780	142370	185550	108860	9192900	0	6971100	4	4	3	8	8	5.7	78.13	0.00062834	2.4648	21839000	5	1	2	2	1	2	2	1	2	2	1	1	2
65	A2A4Z0;Q9D1C1;Q3UWQ1;A2A4Z1	A2A4Z0;Q9D1C1;Q3UWQ1;A2A4Z1	Ubiquitin-conjugating enzyme E2 C	Ube2c	tr|A2A4Z0|A2A4Z0_MOUSE Ubiquitin-conjugating enzyme E2C OS=Mus musculus GN=Ube2c PE=2 SV=1;sp|Q9D1C1|UBE2C_MOUSE Ubiquitin-conjugating enzyme E2 C OS=Mus musculus GN=Ube2c PE=2 SV=1;tr|Q3UWQ1|Q3UWQ1_MOUSE Putative uncharacterized protein OS=Mus musculus GN	812620000	951270000	1218400000	229410000	62509000	73174000	93725000	1253700000	1188300000	1277800000	8	8	8	60.3	60.3	60.3	19.606	0	21.581	2982300000	29	10	8	11	6	5	8	6	5	8	6	5	8
66	A2A547;Q5I0T8;P84099	A2A547;Q5I0T8;P84099	Ribosomal protein L19;60S ribosomal protein L19	Rpl19	tr|A2A547|A2A547_MOUSE Ribosomal protein L19 OS=Mus musculus GN=Rpl19 PE=3 SV=1;tr|Q5I0T8|Q5I0T8_MOUSE Ribosomal protein L19 OS=Mus musculus GN=Rpl19 PE=2 SV=1;sp|P84099|RL19_MOUSE 60S ribosomal protein L19 OS=Mus musculus GN=Rpl19 PE=1 SV=1	7225600000	6409600000	7927300000	2395800000	802840000	712170000	880810000	7378700000	5992600000	7502300000	7	7	7	28.4	28.4	28.4	23.247	0	59.303	21562000000	138	51	42	45	7	7	7	7	7	7	7	7	7
67	Q9D6Z9;A2A590;A2A588;Q3V2D6;Q3V2C1	Q9D6Z9;A2A590;A2A588;Q3V2D6;Q3V2C1	Keratin-associated protein 9-3	Krtap1-5;Krtap1-3;Krtap1-4;Krtap9-3	tr|Q9D6Z9|Q9D6Z9_MOUSE Putative uncharacterized protein OS=Mus musculus GN=Krtap1-5 PE=2 SV=1;tr|A2A590|A2A590_MOUSE Keratin associated protein 1-5 OS=Mus musculus GN=Krtap1-5 PE=2 SV=1;tr|A2A588|A2A588_MOUSE Protein Krtap1-3 OS=Mus musculus GN=Krtap1-3 PE	7748300	20625000	28025000	28199000	3874200	10313000	14013000	20132000	21626000	21550000	2	2	2	13.9	13.9	13.9	12.455	0.00047809	2.6434	56399000	6	1	3	2	1	2	2	1	2	2	1	2	2
68	A2A5I7;Q9D3D0	A2A5I7;Q9D3D0	Alpha-tocopherol transfer protein-like	Ttpal	tr|A2A5I7|A2A5I7_MOUSE Alpha-tocopherol transfer protein-like (Fragment) OS=Mus musculus GN=Ttpal PE=4 SV=2;sp|Q9D3D0|TTPAL_MOUSE Alpha-tocopherol transfer protein-like OS=Mus musculus GN=Ttpal PE=2 SV=3	18704000	18350000	24916000	5633700	1700400	1668200	2265100	19939000	17175000	25749000	1	1	1	6.7	6.7	6.7	22.403	0.00062784	2.4556	61970000	3	1	1	1	1	1	1	1	1	1	1	1	1
69	A2A5N2;Q9CQV8-2;Q9CQV8;A2A5N1	A2A5N2;Q9CQV8-2;Q9CQV8;A2A5N1	14-3-3 protein beta/alpha;14-3-3 protein beta/alpha, N-terminally processed	Ywhab	tr|A2A5N2|A2A5N2_MOUSE Tyrosine 3-monooxygenase/tryptophan 5-monooxygenase activation protein, beta polypeptide OS=Mus musculus GN=Ywhab PE=2 SV=1;sp|Q9CQV8-2|1433B_MOUSE Isoform Short of 14-3-3 protein beta/alpha OS=Mus musculus GN=Ywhab;sp|Q9CQV8|1433B_M	7951200000	8846399000	9102500000	1523500000	467720000	520380000	535440000	8271800000	9532800000	8797400000	15	9	9	65.4	48	48	28.086	0	126.64	25900000000	42	16	12	14	14	12	13	8	6	7	8	6	7
70	A2A5R2;Q3U2F2;Q3U5C3;F6YCJ0	A2A5R2;Q3U2F2	Brefeldin A-inhibited guanine nucleotide-exchange protein 2	Arfgef2	sp|A2A5R2|BIG2_MOUSE Brefeldin A-inhibited guanine nucleotide-exchange protein 2 OS=Mus musculus GN=Arfgef2 PE=1 SV=1;tr|Q3U2F2|Q3U2F2_MOUSE Putative uncharacterized protein (Fragment) OS=Mus musculus GN=Arfgef2 PE=2 SV=1	1228900000	1485400000	1862100000	41985000	11274000	13627000	17084000	1778100000	1971100000	1883000000	36	36	25	27.3	27.3	19.5	202.24	0	95.585	4576400000	119	33	39	47	25	28	31	25	28	31	17	20	22
71	A2A5R8;Q9DBE7;Q641P2;Q3TJ07;Q3UTC8;Q3TWA1;Q3U7A6;Q3U8D3;Q9Z108	A2A5R8;Q9DBE7;Q641P2;Q3TJ07;Q3UTC8;Q3TWA1;Q3U7A6;Q3U8D3;Q9Z108	Double-stranded RNA-binding protein Staufen homolog 1	Stau1	tr|A2A5R8|A2A5R8_MOUSE Double-stranded RNA-binding protein Staufen homolog 1 OS=Mus musculus GN=Stau1 PE=4 SV=1;tr|Q9DBE7|Q9DBE7_MOUSE Double-stranded RNA-binding protein Staufen homolog 1 OS=Mus musculus GN=Stau1 PE=2 SV=1;tr|Q641P2|Q641P2_MOUSE Stau1 pro	1494200000	1448500000	1603800000	137770000	45280000	43894000	48600000	1739200000	1840500000	2032300000	19	19	1	47	47	2.1	53.746	0	56.838	4546500000	66	20	24	22	14	16	14	14	16	14	1	1	1
72	A2A5S3;Q3TWP5;Q3TU43;Q3UKX3;V9GX87;Q6TNG5	A2A5S3;Q3TWP5;Q3TU43;Q3UKX3;V9GX87;Q6TNG5		Stau1	tr|A2A5S3|A2A5S3_MOUSE Double-stranded RNA-binding protein Staufen homolog 1 OS=Mus musculus GN=Stau1 PE=4 SV=1;tr|Q3TWP5|Q3TWP5_MOUSE Putative uncharacterized protein (Fragment) OS=Mus musculus GN=Stau1 PE=2 SV=1;tr|Q3TU43|Q3TU43_MOUSE Putative uncharacte	19916000	10256000	8564000	1173800	603530	310780	259510	0	10131000	9049400	19	1	1	47.3	3.2	3.2	54.855	0.00062863	2.4747	38736000	3	1	1	1	14	16	14	1	1	1	1	1	1
73	Q3UQ95;A2A5W4;Q6P0X6;Q923X4-2;Q923X4	Q3UQ95;A2A5W4;Q6P0X6;Q923X4-2;Q923X4	Glutaredoxin-2, mitochondrial	Glrx2	tr|Q3UQ95|Q3UQ95_MOUSE Putative uncharacterized protein OS=Mus musculus GN=Glrx2 PE=2 SV=1;tr|A2A5W4|A2A5W4_MOUSE Glutaredoxin 2 (Thioltransferase) OS=Mus musculus GN=Glrx2 PE=2 SV=1;tr|Q6P0X6|Q6P0X6_MOUSE Glrx2 protein (Fragment) OS=Mus musculus GN=Glrx2	8604300	142460000	9446200	20064000	1075500	17808000	1180800	11622000	150360000	12134000	1	1	1	8.1	8.1	8.1	14.042	0.0025487	1.7767	160510000	3	1	1	1	1	1	1	1	1	1	1	1	1
74	E5D6T0;E9Q6A7;A2A655;A2A654;Q3UPA6;Q6P9L3;Q8K092;Q8CFX5;Q8VDN7;Q3TMJ3;Q8C473;A2A653;A2A652	E5D6T0;E9Q6A7;A2A655;A2A654		Bptf	tr|E5D6T0|E5D6T0_MOUSE Bromodomain PHD finger transcription factor splice variant OS=Mus musculus GN=Bptf PE=2 SV=1;tr|E9Q6A7|E9Q6A7_MOUSE Protein Bptf OS=Mus musculus GN=Bptf PE=4 SV=1;tr|A2A655|A2A655_MOUSE Protein Bptf OS=Mus musculus GN=Bptf PE=4 SV=1;	350380000	428430000	470640000	8385500	2351500	2875300	3158600	514740000	492190000	517080000	24	24	24	13.2	13.2	13.2	291.86	0	45.051	1249400000	51	15	22	14	15	19	15	15	19	15	15	19	15
75	A2A690;A2A690-2;F6VCI2;F6VP19	A2A690;A2A690-2	Protein TANC2	Tanc2	sp|A2A690|TANC2_MOUSE Protein TANC2 OS=Mus musculus GN=Tanc2 PE=1 SV=1;sp|A2A690-2|TANC2_MOUSE Isoform 2 of Protein TANC2 OS=Mus musculus GN=Tanc2	4372700	21209000	26458000	464640	39042	189370	236230	26838000	22489000	22752000	3	3	3	1.7	1.7	1.7	220.26	0.00017215	3.8797	52040000	4	1	1	2	1	2	2	1	2	2	1	2	2
76	A2A6A1;A0PJ58;Q8BHS4;F6QGP8	A2A6A1	G patch domain-containing protein 8	Gpatch8	sp|A2A6A1|GPTC8_MOUSE G patch domain-containing protein 8 OS=Mus musculus GN=Gpatch8 PE=1 SV=1	175900000	289770000	258070000	10052000	2443000	4024500	3584300	268840000	280690000	280390000	11	11	10	9.6	9.6	9	164.99	0	22.482	723730000	23	7	9	7	6	9	7	6	9	7	6	8	6
77	A2A6M1;Q9CZ28	A2A6M1;Q9CZ28	Vacuolar-sorting protein SNF8	Snf8	tr|A2A6M1|A2A6M1_MOUSE Vacuolar-sorting protein SNF8 OS=Mus musculus GN=Snf8 PE=4 SV=1;sp|Q9CZ28|SNF8_MOUSE Vacuolar-sorting protein SNF8 OS=Mus musculus GN=Snf8 PE=2 SV=1	62618000	51705000	103300000	27203000	7827200	6463100	12912000	0	0	95913000	4	4	4	21.9	21.9	21.9	25.968	0	8.0793	217620000	2	0	0	2	2	2	3	2	2	3	2	2	3
78	A2A6Q5;A2A6Q5-2;A2A6Q5-3;Q3TTW1;Q3UYS3;Q8BYJ1;Q8R568	A2A6Q5;A2A6Q5-2;A2A6Q5-3	Cell division cycle protein 27 homolog	Cdc27	sp|A2A6Q5|CDC27_MOUSE Cell division cycle protein 27 homolog OS=Mus musculus GN=Cdc27 PE=1 SV=1;sp|A2A6Q5-2|CDC27_MOUSE Isoform 2 of Cell division cycle protein 27 homolog OS=Mus musculus GN=Cdc27;sp|A2A6Q5-3|CDC27_MOUSE Isoform 3 of Cell division cycle pr	582110000	656070000	577930000	44295000	14198000	16002000	14096000	618040000	815020000	659090000	14	14	14	25	25	25	91.841	0	30.725	1816100000	39	13	10	16	10	8	11	10	8	11	10	8	11
79	Q6KAU5;A2A6S1;B2RU54;Q3TB48	Q6KAU5;A2A6S1;B2RU54;Q3TB48	Transmembrane protein 104	mFLJ00021;Tmem104	tr|Q6KAU5|Q6KAU5_MOUSE MFLJ00021 protein (Fragment) OS=Mus musculus GN=mFLJ00021 PE=4 SV=1;tr|A2A6S1|A2A6S1_MOUSE Transmembrane protein 104 OS=Mus musculus GN=Tmem104 PE=4 SV=1;tr|B2RU54|B2RU54_MOUSE Transmembrane protein 104 OS=Mus musculus GN=Tmem104 PE=	0	0	32842000	2736800	0	0	2736800	0	0	28784000	1	1	1	2.4	2.4	2.4	51.268	0.00032954	3.0747	32842000	2	0	1	1	0	1	1	0	1	1	0	1	1
80	B2RWR4;B7ZMV4;A2A6T1	B2RWR4;B7ZMV4;A2A6T1	Cerebellar degeneration-related protein 2-like	Cdr2l	tr|B2RWR4|B2RWR4_MOUSE Cerebellar degeneration-related protein 2-like OS=Mus musculus GN=Cdr2l PE=2 SV=1;tr|B7ZMV4|B7ZMV4_MOUSE Cdr2l protein OS=Mus musculus GN=Cdr2l PE=2 SV=1;sp|A2A6T1|CDR2L_MOUSE Cerebellar degeneration-related protein 2-like OS=Mus mus	189860000	209270000	155320000	17885000	6124400	6750500	5010300	193460000	234740000	177280000	7	7	7	18.3	18.3	18.3	53.238	0	12.93	554440000	19	5	8	6	4	6	3	4	6	3	4	6	3
81	A2A6T4;Q8R035;Q8R035-2;D6RHR8	A2A6T4;Q8R035;Q8R035-2	Peptidyl-tRNA hydrolase ICT1, mitochondrial	Ict1	tr|A2A6T4|A2A6T4_MOUSE Immature colon carcinoma transcript 1, isoform CRA_c OS=Mus musculus GN=Ict1 PE=4 SV=1;sp|Q8R035|ICT1_MOUSE Peptidyl-tRNA hydrolase ICT1, mitochondrial OS=Mus musculus GN=Ict1 PE=1 SV=1;sp|Q8R035-2|ICT1_MOUSE Isoform 2 of Peptidyl-tR	314020000	247400000	202430000	58757000	24155000	19031000	15571000	337730000	454870000	152870000	4	4	4	26.9	26.9	26.9	21.356	0	6.52	763840000	8	5	2	1	4	2	3	4	2	3	4	2	3
82	A2A791;A2A791-2;F6VYE2	A2A791;A2A791-2;F6VYE2	Zinc finger MYM-type protein 4	Zmym4	sp|A2A791|ZMYM4_MOUSE Zinc finger MYM-type protein 4 OS=Mus musculus GN=Zmym4 PE=2 SV=1;sp|A2A791-2|ZMYM4_MOUSE Isoform 2 of Zinc finger MYM-type protein 4 OS=Mus musculus GN=Zmym4;tr|F6VYE2|F6VYE2_MOUSE Zinc finger MYM-type protein 4 (Fragment) OS=Mus mus	466310000	390380000	761070000	19491000	5618200	4703300	9169500	568220000	607720000	687570000	22	22	22	19.4	19.4	19.4	172.44	0	43.829	1617800000	54	18	15	21	17	14	17	17	14	17	17	14	17
83	A2A7A7;Q8CFX1;Q8QZU3;A2A7A8;Q3TFM8	A2A7A7;Q8CFX1	GDH/6PGL endoplasmic bifunctional protein;Glucose 1-dehydrogenase;6-phosphogluconolactonase	H6pd	tr|A2A7A7|A2A7A7_MOUSE GDH/6PGL endoplasmic bifunctional protein OS=Mus musculus GN=H6pd PE=1 SV=1;sp|Q8CFX1|G6PE_MOUSE GDH/6PGL endoplasmic bifunctional protein OS=Mus musculus GN=H6pd PE=1 SV=2	144840000	121200000	491670000	18040000	3448500	2885600	11706000	304710000	311760000	417970000	11	11	11	19.9	19.9	19.9	89.909	0	19.758	757700000	19	6	4	9	6	5	9	6	5	9	6	5	9
84	B9EKQ3;A2A7B5;Q80VF3	B9EKQ3;A2A7B5;Q80VF3		Prdm2	tr|B9EKQ3|B9EKQ3_MOUSE Prdm2 protein OS=Mus musculus GN=Prdm2 PE=2 SV=1;tr|A2A7B5|A2A7B5_MOUSE Protein Prdm2 OS=Mus musculus GN=Prdm2 PE=1 SV=1;tr|Q80VF3|Q80VF3_MOUSE Prdm2 protein (Fragment) OS=Mus musculus GN=Prdm2 PE=2 SV=1	9909300	0	40458000	578930	113900	0	465030	22516000	0	29939000	2	2	2	1.5	1.5	1.5	182.93	0.0003216	2.7684	50367000	3	1	0	2	1	0	2	1	0	2	1	0	2
85	E9Q532;A2A7F4;Q3TR19;Q3V1H6;A2A7F3;Q8BVB9;Q3TAD2;Q922U7	E9Q532;A2A7F4;Q3TR19;Q3V1H6		Rlf	tr|E9Q532|E9Q532_MOUSE Insulin-like 3 OS=Mus musculus GN=Rlf PE=4 SV=1;tr|A2A7F4|A2A7F4_MOUSE Insulin-like 3 OS=Mus musculus GN=Rlf PE=4 SV=1;tr|Q3TR19|Q3TR19_MOUSE Putative uncharacterized protein (Fragment) OS=Mus musculus GN=Rlf PE=2 SV=1;tr|Q3V1H6|Q3V1	86026000	62148000	63219000	2375200	966580	698300	710330	70064000	89890000	99759000	6	6	6	4.9	4.9	4.9	206.28	0	13.334	211390000	12	5	4	3	5	4	3	5	4	3	5	4	3
86	F6Z4F8;Q3UDB2;A2A7F7;Q9WU20;Q497H7;Q3V399;F7BGN3	F6Z4F8;Q3UDB2;A2A7F7;Q9WU20;Q497H7;Q3V399;F7BGN3	Methylenetetrahydrofolate reductase	Mthfr	tr|F6Z4F8|F6Z4F8_MOUSE Methylenetetrahydrofolate reductase (Fragment) OS=Mus musculus GN=Mthfr PE=3 SV=1;tr|Q3UDB2|Q3UDB2_MOUSE Methylenetetrahydrofolate reductase OS=Mus musculus GN=Mthfr PE=2 SV=1;tr|A2A7F7|A2A7F7_MOUSE Methylenetetrahydrofolate reductas	42192000	21755000	8991500	1823500	1054800	543890	224790	32320000	47798000	0	4	4	4	8.1	8.1	8.1	76.214	0	4.1366	72938000	3	1	2	0	2	2	1	2	2	1	2	2	1
87	D6RHP0;G3UY69;E9PUJ0;A2A7H6;A2A7H4;G3UZT3;A2A7H5;G3UYF5;Q8BK26-2;Q8BK26	D6RHP0;G3UY69;E9PUJ0;A2A7H6;A2A7H4;G3UZT3;A2A7H5;G3UYF5;Q8BK26-2;Q8BK26	F-box only protein 44	Fbxo44	tr|D6RHP0|D6RHP0_MOUSE F-box only protein 44 OS=Mus musculus GN=Fbxo44 PE=4 SV=2;tr|G3UY69|G3UY69_MOUSE F-box only protein 44 OS=Mus musculus GN=Fbxo44 PE=4 SV=1;tr|E9PUJ0|E9PUJ0_MOUSE F-box only protein 44 OS=Mus musculus GN=Fbxo44 PE=4 SV=1;tr|A2A7H6|A2A	17992000	0	50712000	9815000	2570300	0	7244600	48778000	0	31923000	2	2	2	25.6	25.6	25.6	13.626	0.0062765	1.3783	68705000	3	1	0	2	1	0	2	1	0	2	1	0	2
88	A6PW84;A2A7Q5;Q3V1T4;Q3V1T4-3;Q3V1T4-2;F2Z499	A6PW84;A2A7Q5;Q3V1T4;Q3V1T4-3;Q3V1T4-2	Prolyl 3-hydroxylase 1	P3h1;Lepre1	tr|A6PW84|A6PW84_MOUSE Prolyl 3-hydroxylase 1 OS=Mus musculus GN=Lepre1 PE=4 SV=1;tr|A2A7Q5|A2A7Q5_MOUSE Prolyl 3-hydroxylase 1 OS=Mus musculus GN=Lepre1 PE=4 SV=1;sp|Q3V1T4|P3H1_MOUSE Prolyl 3-hydroxylase 1 OS=Mus musculus GN=Lepre1 PE=2 SV=2;sp|Q3V1T4-3|	284280000	416460000	375110000	28312000	7480900	10959000	9871300	344440000	383930000	473060000	7	7	7	11.5	11.5	11.5	84.472	0	20.106	1075800000	17	4	9	4	4	5	3	4	5	3	4	5	3
89	A2A7S7;Q91WQ3;F6VXZ2	A2A7S7;Q91WQ3	Tyrosine--tRNA ligase;Tyrosine--tRNA ligase, cytoplasmic;Tyrosine--tRNA ligase, cytoplasmic, N-terminally processed	Yars	tr|A2A7S7|A2A7S7_MOUSE Tyrosine--tRNA ligase, cytoplasmic OS=Mus musculus GN=Yars PE=4 SV=1;sp|Q91WQ3|SYYC_MOUSE Tyrosine--tRNA ligase, cytoplasmic OS=Mus musculus GN=Yars PE=2 SV=3	12234000000	12639000000	13139000000	808760000	260290000	268920000	279560000	13476000000	15590000000	14209000000	48	48	48	77.8	77.8	77.8	63.001	0	125	38012000000	235	75	78	82	39	42	42	39	42	42	39	42	42
90	A2A7T8;Q05CB3;Q3TJB1;Q9D294;Q8BQI6;Q6PG63;Q9D102;Q6P214;Q3V1K4;A2A7U0	A2A7T8;Q05CB3;Q3TJB1;Q9D294;Q8BQI6;Q6PG63;Q9D102;Q6P214;Q3V1K4		Zmym1	tr|A2A7T8|A2A7T8_MOUSE Protein Zmym1 OS=Mus musculus GN=Zmym1 PE=4 SV=1;tr|Q05CB3|Q05CB3_MOUSE Zmym1 protein (Fragment) OS=Mus musculus GN=Zmym1 PE=2 SV=1;tr|Q3TJB1|Q3TJB1_MOUSE Protein Zmym1 OS=Mus musculus GN=Zmym1 PE=2 SV=1;tr|Q9D294|Q9D294_MOUSE Putati	27793000	106290000	10011000	2771000	534480	2044000	192520	95555000	94983000	44366000	5	5	5	7.2	7.2	7.2	100.03	0	5.2385	144090000	10	4	4	2	4	4	2	4	4	2	4	4	2
91	A2A7Z4;Q78IG7;Q9CQH7	A2A7Z4;Q78IG7;Q9CQH7	Transcription factor BTF3;Transcription factor BTF3 homolog 4	Btf3l4	tr|A2A7Z4|A2A7Z4_MOUSE Basic transcription factor 3-like 4 OS=Mus musculus GN=Btf3l4 PE=2 SV=1;tr|Q78IG7|Q78IG7_MOUSE Btf3l4 protein (Fragment) OS=Mus musculus GN=Btf3l4 PE=2 SV=1;sp|Q9CQH7|BT3L4_MOUSE Transcription factor BTF3 homolog 4 OS=Mus musculus GN	900650000	1073700000	1559100000	353340000	90065000	107370000	155910000	1215000000	1371200000	1151400000	9	9	9	68.4	68.4	68.4	17.27	0	72.919	3533400000	37	8	13	16	7	7	8	7	7	8	7	7	8
92	A2A837;Q8K3A8	A2A837;Q8K3A8		Srsf4	tr|A2A837|A2A837_MOUSE Serine/arginine-rich-splicing factor 4 OS=Mus musculus GN=Srsf4 PE=4 SV=1;tr|Q8K3A8|Q8K3A8_MOUSE Sfrs4 protein OS=Mus musculus GN=Srsf4 PE=2 SV=1	0	669350	162360000	6792900	0	27890	6765000	0	2964600	177770000	9	1	1	18.8	1.8	1.8	56.455	1	-2	163030000	2	1	0	1	8	8	8	1	1	1	1	1	1
93	B6ZHC8;A2A841;P48193-2;P48193;A2A842;A0A068WAZ7;A2A839;A2A838;A0A068WAQ5;A2AD32;Q3UH12;F7BUB8;F6S4K9;Q3V048;B6ZHC2;Q3U0G7;F7CR30	B6ZHC8;A2A841;P48193-2;P48193;A2A842;A0A068WAZ7;A2A839;A2A838;A0A068WAQ5;A2AD32;Q3UH12	Protein 4.1	Epb4.1;Epb41	tr|B6ZHC8|B6ZHC8_MOUSE Erythrocyte protein band 4.1 OS=Mus musculus GN=Epb4.1 PE=2 SV=1;tr|A2A841|A2A841_MOUSE Protein 4.1 OS=Mus musculus GN=Epb4.1 PE=1 SV=1;sp|P48193-2|41_MOUSE Isoform 2 of Protein 4.1 OS=Mus musculus GN=Epb41;sp|P48193|41_MOUSE Protein	684880000	556550000	660620000	37295000	13429000	10913000	12953000	716710000	722100000	735400000	20	18	15	26.4	23.9	19.2	91.542	0	43.529	1902000000	42	14	13	15	16	10	12	14	9	11	11	7	8
94	A2A8E2;Q8BHG2;Q8BHG2-3;B7ZC72;B7ZC71;Q8BHG2-2;A2A8E4;D6REH4	A2A8E2;Q8BHG2;Q8BHG2-3;B7ZC72;B7ZC71;Q8BHG2-2	UPF0587 protein C1orf123 homolog	0610037L13Rik	tr|A2A8E2|A2A8E2_MOUSE Protein 0610037L13Rik OS=Mus musculus GN=0610037L13Rik PE=4 SV=1;sp|Q8BHG2|CA123_MOUSE UPF0587 protein C1orf123 homolog OS=Mus musculus PE=2 SV=1;sp|Q8BHG2-3|CA123_MOUSE Isoform 3 of UPF0587 protein C1orf123 homolog OS=Mus musculus;t	381180000	545090000	544750000	133730000	34653000	49554000	49523000	730710000	573990000	672150000	4	4	4	38.4	38.4	38.4	15.783	0	10.714	1471000000	16	3	8	5	3	4	3	3	4	3	3	4	3
95	A2A8L5;F6Y3V0;F6S1X8;Q4U1Z0;Q3TT24;Q3V0J9;Q3V315	A2A8L5;F6Y3V0;F6S1X8;Q4U1Z0	Receptor-type tyrosine-protein phosphatase F	Ptprf	sp|A2A8L5|PTPRF_MOUSE Receptor-type tyrosine-protein phosphatase F OS=Mus musculus GN=Ptprf PE=1 SV=1;tr|F6Y3V0|F6Y3V0_MOUSE Receptor-type tyrosine-protein phosphatase F (Fragment) OS=Mus musculus GN=Ptprf PE=4 SV=1;tr|F6S1X8|F6S1X8_MOUSE Receptor-type tyr	14731000	72150000	53056000	1260700	132710	650000	477980	24493000	117570000	57447000	6	6	5	4.6	4.6	4.1	211.49	0	9.9015	139940000	11	1	5	5	1	5	4	1	5	4	0	4	3
96	A2A8L9;Q8BW72-2;Q8BW72	A2A8L9;Q8BW72-2;Q8BW72	Lysine-specific demethylase 4A	Kdm4a	tr|A2A8L9|A2A8L9_MOUSE Lysine-specific demethylase 4A OS=Mus musculus GN=Kdm4a PE=4 SV=1;sp|Q8BW72-2|KDM4A_MOUSE Isoform 2 of Lysine-specific demethylase 4A OS=Mus musculus GN=Kdm4a;sp|Q8BW72|KDM4A_MOUSE Lysine-specific demethylase 4A OS=Mus musculus GN=Kd	24780000	52305000	128040000	4459300	538690	1137100	2783600	38133000	66838000	125200000	7	7	7	9.8	9.8	9.8	115.97	0	7.7498	205130000	11	2	3	6	2	3	6	2	3	6	2	3	6
97	E9Q2S4;A2A8M8	E9Q2S4;A2A8M8		Pramef6	tr|E9Q2S4|E9Q2S4_MOUSE Protein Pramef6 OS=Mus musculus GN=Pramef6 PE=4 SV=1;tr|A2A8M8|A2A8M8_MOUSE Protein Pramef6 OS=Mus musculus GN=Pramef6 PE=4 SV=1	228630000	261850000	234680000	24172000	7621000	8728400	7822500	248780000	403130000	220120000	1	1	1	3.2	3.2	3.2	53.659	1	-2	725160000	3	1	1	1	1	1	1	1	1	1	1	1	1
98	A8Y5G5;A2A8R0;Q6PDX5;Q80XL0;A0S860	A8Y5G5;A2A8R0		Zfyve9	tr|A8Y5G5|A8Y5G5_MOUSE Protein Zfyve9 OS=Mus musculus GN=Zfyve9 PE=4 SV=1;tr|A2A8R0|A2A8R0_MOUSE MCG17975 OS=Mus musculus GN=Zfyve9 PE=4 SV=1	0	13064000	30872000	697390	0	207360	490030	0	26183000	25851000	4	4	4	5.2	5.2	5.2	146.33	0	5.2844	43935000	6	0	3	3	0	3	3	0	3	3	0	3	3
99	A2A8R7;B2RX14;Q9EQN6;Q3V3D5;Q8BIZ5	A2A8R7;B2RX14	Terminal uridylyltransferase 4	Zcchc11	tr|A2A8R7|A2A8R7_MOUSE Terminal uridylyltransferase 4 OS=Mus musculus GN=Zcchc11 PE=1 SV=1;sp|B2RX14|TUT4_MOUSE Terminal uridylyltransferase 4 OS=Mus musculus GN=Zcchc11 PE=1 SV=2	188010000	234780000	129230000	5359500	1825400	2279500	1254600	132240000	205380000	234840000	9	7	7	7.4	6.3	6.3	185.12	0	13.29	552030000	15	4	6	5	5	7	6	4	5	5	4	5	5
100	A2A8S2;A2A8S3;Q91VU1	A2A8S2;A2A8S3;Q91VU1	Protein YIPF;Protein YIPF1	Yipf1	tr|A2A8S2|A2A8S2_MOUSE Protein YIPF1 (Fragment) OS=Mus musculus GN=Yipf1 PE=4 SV=2;tr|A2A8S3|A2A8S3_MOUSE Protein YIPF1 (Fragment) OS=Mus musculus GN=Yipf1 PE=4 SV=1;sp|Q91VU1|YIPF1_MOUSE Protein YIPF1 OS=Mus musculus GN=Yipf1 PE=2 SV=1	30394000	25223000	41405000	16170000	5065600	4203900	6900800	42708000	60663000	35214000	2	2	2	7.8	7.8	7.8	27.434	0.0028396	1.7271	97022000	4	1	1	2	2	1	2	2	1	2	2	1	2
101	Q3TXY3;A2A8U2-2;A2A8U2-3;A2A8U2;Q8C397;Q8C9U2	Q3TXY3;A2A8U2-2;A2A8U2-3;A2A8U2;Q8C397	Transmembrane protein 201	Tmem201	tr|Q3TXY3|Q3TXY3_MOUSE Putative uncharacterized protein OS=Mus musculus GN=Tmem201 PE=2 SV=1;sp|A2A8U2-2|TM201_MOUSE Isoform Samp1 of Transmembrane protein 201 OS=Mus musculus GN=Tmem201;sp|A2A8U2-3|TM201_MOUSE Isoform 3 of Transmembrane protein 201 OS=Mus	107260000	41521000	64021000	16369000	8250500	3193900	4924700	87046000	68743000	95174000	5	5	5	19.5	19.5	19.5	39.269	0	16.821	212800000	8	3	1	4	3	2	3	3	2	3	3	2	3
102	E9QKA4;A2A8V8;A2A8V9;E9PUK6;Q52KI8-2;Q52KI8;A2A983;F7BWM1;F6T4M4;F6UK16	E9QKA4;A2A8V8;A2A8V9;E9PUK6;Q52KI8-2;Q52KI8	Serine/arginine repetitive matrix protein 1	Srrm1	tr|E9QKA4|E9QKA4_MOUSE Serine/arginine repetitive matrix protein 1 OS=Mus musculus GN=Srrm1 PE=1 SV=1;tr|A2A8V8|A2A8V8_MOUSE Serine/arginine repetitive matrix protein 1 OS=Mus musculus GN=Srrm1 PE=1 SV=1;tr|A2A8V9|A2A8V9_MOUSE Serine/arginine repetitive ma	2271300000	2514400000	1809200000	129310000	44535000	49301000	35474000	2408500000	2616200000	2274100000	9	9	9	12.5	12.5	12.5	101.16	0	30.621	6594800000	53	19	19	15	8	7	6	8	7	6	8	7	6
103	F6UHR6;E9PXZ2;A2A8Z1;E9Q6C1;Q5FWX7;Z4YJX3;A2A8Z1-2;Q8VDM5;Q8R0G3;Q99LZ2;F8VQE8	F6UHR6;E9PXZ2;A2A8Z1;E9Q6C1;Q5FWX7;Z4YJX3;A2A8Z1-2;Q8VDM5;Q8R0G3	Oxysterol-binding protein;Oxysterol-binding protein-related protein 9	Osbpl9	tr|F6UHR6|F6UHR6_MOUSE Oxysterol-binding protein OS=Mus musculus GN=Osbpl9 PE=1 SV=2;tr|E9PXZ2|E9PXZ2_MOUSE Oxysterol-binding protein OS=Mus musculus GN=Osbpl9 PE=1 SV=2;sp|A2A8Z1|OSBL9_MOUSE Oxysterol-binding protein-related protein 9 OS=Mus musculus GN=O	399430000	363260000	508060000	42358000	13314000	12109000	16935000	509100000	420680000	569880000	12	12	12	24.9	24.9	24.9	81.09	0	28.177	1270800000	39	12	11	16	9	8	11	9	8	11	9	8	11
104	A2A934;A2A930;A2A931;A2A933;A2A935-2;A2A935;A2A935-3	A2A934;A2A930;A2A931;A2A933;A2A935-2;A2A935;A2A935-3	PR domain zinc finger protein 16	Prdm16	tr|A2A934|A2A934_MOUSE PR domain zinc finger protein 16 OS=Mus musculus GN=Prdm16 PE=4 SV=1;tr|A2A930|A2A930_MOUSE PR domain zinc finger protein 16 OS=Mus musculus GN=Prdm16 PE=4 SV=1;tr|A2A931|A2A931_MOUSE PR domain zinc finger protein 16 OS=Mus musculus	14377000000	14301000000	2459800000	546280000	252230000	250900000	43155000	15834000000	17021000000	6183300000	1	1	1	0.8	0.8	0.8	130.34	0.0085285	1.266	31138000000	10	2	4	4	1	1	1	1	1	1	1	1	1
105	A8Y5H7;Q99J07;Q9DBQ0;A2A9B9;Q6A071;Q8BXE6	A8Y5H7;Q99J07;Q9DBQ0;A2A9B9;Q6A071		Sec14l1	tr|A8Y5H7|A8Y5H7_MOUSE Protein Sec14l1 OS=Mus musculus GN=Sec14l1 PE=4 SV=1;tr|Q99J07|Q99J07_MOUSE Protein Sec14l1 OS=Mus musculus GN=Sec14l1 PE=2 SV=1;tr|Q9DBQ0|Q9DBQ0_MOUSE Putative uncharacterized protein OS=Mus musculus GN=Sec14l1 PE=2 SV=1;tr|A2A9B9|A	11987000	15336000	140790000	3820800	272430	348550	3199900	15914000	15944000	0	5	5	5	7.6	7.6	7.6	81.215	0	5.7845	168120000	5	2	2	1	2	3	1	2	3	1	2	3	1
106	A2A9C3-2;A2A9C3;Q6ZQA5;V9GXW1	A2A9C3-2;A2A9C3;Q6ZQA5	Protein SZT2	Szt2;mKIAA0467	sp|A2A9C3-2|SZT2_MOUSE Isoform 2 of Protein SZT2 OS=Mus musculus GN=Szt2;sp|A2A9C3|SZT2_MOUSE Protein SZT2 OS=Mus musculus GN=Szt2 PE=1 SV=1;tr|Q6ZQA5|Q6ZQA5_MOUSE MKIAA0467 protein (Fragment) OS=Mus musculus GN=mKIAA0467 PE=4 SV=2	31022000	193950000	24728000	1504200	186880	1168300	148960	82824000	158330000	53580000	5	5	5	2.8	2.8	2.8	377.52	0	7.4719	249700000	9	3	4	2	3	4	3	3	4	3	3	4	3
107	A2A9C6;A2A9C8;Q9CY05;Q9DAY7;Q9D7W5	A2A9C6;A2A9C8;Q9CY05;Q9DAY7;Q9D7W5	Mediator of RNA polymerase II transcription subunit 8	Med8	tr|A2A9C6|A2A9C6_MOUSE Mediator of RNA polymerase II transcription subunit 8 (Fragment) OS=Mus musculus GN=Med8 PE=4 SV=1;tr|A2A9C8|A2A9C8_MOUSE Mediator of RNA polymerase II transcription subunit 8 OS=Mus musculus GN=Med8 PE=4 SV=1;tr|Q9CY05|Q9CY05_MOUSE	22828000	0	17398000	6704200	3804600	0	2899600	32475000	0	20228000	1	1	1	18.7	18.7	18.7	8.4753	0.00033234	3.1989	40225000	2	1	0	1	1	0	1	1	0	1	1	0	1
108	A2A9F7;Q8VEJ1	A2A9F7;Q8VEJ1	GPN-loop GTPase 2	Gpn2	tr|A2A9F7|A2A9F7_MOUSE GPN-loop GTPase 2 OS=Mus musculus GN=Gpn2 PE=4 SV=1;sp|Q8VEJ1|GPN2_MOUSE GPN-loop GTPase 2 OS=Mus musculus GN=Gpn2 PE=2 SV=2	10794000	27897000	21532000	5018600	899510	2324700	1794300	20793000	28577000	23145000	1	1	1	7.3	7.3	7.3	31.814	0	4.0742	60223000	3	1	1	1	1	1	1	1	1	1	1	1	1
109	A2A9I0;O35166	A2A9I0;O35166	Golgi SNAP receptor complex member 2	Gosr2	tr|A2A9I0|A2A9I0_MOUSE Golgi SNAP receptor complex member 2 OS=Mus musculus GN=Gosr2 PE=4 SV=1;sp|O35166|GOSR2_MOUSE Golgi SNAP receptor complex member 2 OS=Mus musculus GN=Gosr2 PE=2 SV=2	79952000	0	58159000	15346000	8883500	0	6462100	92238000	0	66630000	3	3	3	17.6	17.6	17.6	19.571	0	5.4686	138110000	3	2	0	1	2	0	2	2	0	2	2	0	2
110	E9PX48;A2A9M5;Q8R1A4-2;Q8R1A4;A2A9M4;Q3U806;Q7TPP0;F6ZJ55;A2AW79;Q6ZPS1	E9PX48;A2A9M5;Q8R1A4-2;Q8R1A4	Dedicator of cytokinesis protein 7	Dock7	tr|E9PX48|E9PX48_MOUSE Dedicator of cytokinesis protein 7 OS=Mus musculus GN=Dock7 PE=1 SV=1;tr|A2A9M5|A2A9M5_MOUSE Dedicator of cytokinesis protein 7 OS=Mus musculus GN=Dock7 PE=1 SV=1;sp|Q8R1A4-2|DOCK7_MOUSE Isoform 2 of Dedicator of cytokinesis protein	5522000000	5675200000	5678800000	140630000	46017000	47294000	47323000	7059600000	6771600000	7040800000	68	68	64	43.9	43.9	41.9	238.09	0	323.31	16876000000	243	80	80	83	52	55	60	52	55	60	48	52	56
111	Q8R190;A2A9P6;P24788-2;P24788;Q64036;Q05AA8;Q64434	Q8R190;A2A9P6;P24788-2;P24788	Cyclin-dependent kinase 11B	Cdk11b	tr|Q8R190|Q8R190_MOUSE Cdc2l1 protein (Fragment) OS=Mus musculus GN=Cdk11b PE=2 SV=1;tr|A2A9P6|A2A9P6_MOUSE Cyclin-dependent kinase 11B OS=Mus musculus GN=Cdk11b PE=1 SV=1;sp|P24788-2|CD11B_MOUSE Isoform 2 of Cyclin-dependent kinase 11B OS=Mus musculus GN=	840220000	285960000	681570000	62336000	28973000	9860600	23502000	877060000	510930000	693630000	12	12	12	34.8	34.8	34.8	41.024	0	17.706	1807700000	33	14	7	12	9	5	9	9	5	9	9	5	9
112	A2A9Q2;Q8BHG1;Q8R320;A6PWC3;Q8CIJ0;Q8R1H1;Q3V3G9;Q9Z153	A2A9Q2;Q8BHG1;Q8R320;A6PWC3;Q8CIJ0;Q8R1H1	Nardilysin	Nrd1	tr|A2A9Q2|A2A9Q2_MOUSE Nardilysin OS=Mus musculus GN=Nrd1 PE=1 SV=1;sp|Q8BHG1|NRDC_MOUSE Nardilysin OS=Mus musculus GN=Nrd1 PE=1 SV=1;tr|Q8R320|Q8R320_MOUSE Nardilysin, N-arginine dibasic convertase, NRD convertase 1 OS=Mus musculus GN=Nrd1 PE=2 SV=1;tr|A6	5539100000	5095500000	5679900000	250990000	85217000	78392000	87383000	6066000000	7006600000	6532100000	39	39	39	42.9	42.9	42.9	140.62	0	162.51	16314000000	159	55	53	51	35	35	33	35	35	33	35	35	33
113	A2A9W3;Q3UBZ5;Q8BTE1;A2A9W1;Q3UBZ5-2	A2A9W3;Q3UBZ5;Q8BTE1	MIF4G domain-containing protein	Mif4gd	tr|A2A9W3|A2A9W3_MOUSE MIF4G domain-containing protein OS=Mus musculus GN=Mif4gd PE=4 SV=1;sp|Q3UBZ5|MI4GD_MOUSE MIF4G domain-containing protein OS=Mus musculus GN=Mif4gd PE=2 SV=1;tr|Q8BTE1|Q8BTE1_MOUSE MIF4G domain containing, isoform CRA_e OS=Mus muscul	45514000	47842000	62484000	10389000	3034200	3189500	4165600	80938000	65843000	40501000	3	3	3	18.2	18.2	18.2	23.311	0.00032568	2.9061	155840000	5	2	1	2	1	1	3	1	1	3	1	1	3
114	S4R2D2;A2A9W7;Q8BMI3;A2A9W5	S4R2D2;A2A9W7;Q8BMI3	ADP-ribosylation factor-binding protein GGA3	Gga3	tr|S4R2D2|S4R2D2_MOUSE ADP-ribosylation factor-binding protein GGA3 OS=Mus musculus GN=Gga3 PE=4 SV=1;tr|A2A9W7|A2A9W7_MOUSE ADP-ribosylation factor-binding protein GGA3 OS=Mus musculus GN=Gga3 PE=4 SV=1;sp|Q8BMI3|GGA3_MOUSE ADP-ribosylation factor-binding	71751000	80152000	89985000	10079000	2989600	3339700	3749400	76773000	102540000	69066000	7	6	6	16.5	15.3	15.3	64.524	0	9.8831	241890000	9	4	2	3	5	4	6	4	3	5	4	3	5
115	A2AA59;Q6ZQF7;Q6ZQF7-2;Q6ZPI0-2;Q6ZPI0	A2AA59;Q6ZQF7;Q6ZQF7-2	Protein Jade-2	Jade2	tr|A2AA59|A2AA59_MOUSE Protein Jade-2 OS=Mus musculus GN=Jade2 PE=1 SV=1;sp|Q6ZQF7|JADE2_MOUSE Protein Jade-2 OS=Mus musculus GN=Jade2 PE=1 SV=2;sp|Q6ZQF7-2|JADE2_MOUSE Isoform 2 of Protein Jade-2 OS=Mus musculus GN=Jade2	28194000	6573900	7715600	1287400	854380	199210	233810	0	8937400	9791300	4	3	3	10.2	7.8	7.8	65.393	0.00033096	3.1433	42484000	4	2	1	1	3	2	1	2	1	1	2	1	1
116	A2AA85;Q6NXN1-2;Q6NXN1	A2AA85;Q6NXN1-2;Q6NXN1	SUZ domain-containing protein 1	Szrd1	tr|A2AA85|A2AA85_MOUSE SUZ domain-containing protein 1 (Fragment) OS=Mus musculus GN=Szrd1 PE=1 SV=1;sp|Q6NXN1-2|SZRD1_MOUSE Isoform 2 of SUZ domain-containing protein 1 OS=Mus musculus GN=Szrd1;sp|Q6NXN1|SZRD1_MOUSE SUZ domain-containing protein 1 OS=Mus	0	0	57112000	6345700	0	0	6345700	0	0	50056000	1	1	1	14.4	14.4	14.4	16.277	0.00032621	2.9249	57112000	1	0	0	1	0	0	1	0	0	1	0	0	1
117	Q7TPT3;Q542L0;A2AAN0;Q3USE0;O35250-2;O35250;Q3TIP4;Q69ZS4;A2AAN3;A2AAN4	Q7TPT3;Q542L0;A2AAN0;Q3USE0;O35250-2;O35250;Q3TIP4;Q69ZS4	Exocyst complex component 7	Exoc7;mKIAA1067	tr|Q7TPT3|Q7TPT3_MOUSE Exoc7 protein OS=Mus musculus GN=Exoc7 PE=2 SV=1;tr|Q542L0|Q542L0_MOUSE Exocyst complex component 7, isoform CRA_a OS=Mus musculus GN=Exoc7 PE=2 SV=1;tr|A2AAN0|A2AAN0_MOUSE Exocyst complex component 7 OS=Mus musculus GN=Exoc7 PE=4 SV	525580000	396540000	908890000	48185000	13831000	10435000	23918000	708770000	731950000	716210000	17	17	17	30.6	30.6	30.6	75.184	0	28.194	1831000000	38	12	13	13	11	10	14	11	10	14	11	10	14
118	A2AAY5;B9EJ37;Q3TDV5;Q8BY34;Q571L4;Q5DTZ1	A2AAY5;B9EJ37	SH3 and PX domain-containing protein 2B	Sh3pxd2b	sp|A2AAY5|SPD2B_MOUSE SH3 and PX domain-containing protein 2B OS=Mus musculus GN=Sh3pxd2b PE=1 SV=1;tr|B9EJ37|B9EJ37_MOUSE SH3 and PX domains 2B OS=Mus musculus GN=Sh3pxd2b PE=2 SV=1	3303400000	3296100000	3532700000	177760000	57954000	57826000	61977000	3872600000	4139700000	4038000000	32	32	30	46.5	46.5	44.5	101.52	0	108.18	10132000000	138	45	44	49	28	25	27	28	25	27	26	23	26
119	A2ABV5;A2BDP0;A2BDN7;A2ABV5-2;A2ABV5-3;A2ABV5-4	A2ABV5;A2BDP0	Mediator of RNA polymerase II transcription subunit 14	Med14	sp|A2ABV5|MED14_MOUSE Mediator of RNA polymerase II transcription subunit 14 OS=Mus musculus GN=Med14 PE=1 SV=1;tr|A2BDP0|A2BDP0_MOUSE Mediator of RNA polymerase II transcription subunit 14 OS=Mus musculus GN=Med14 PE=4 SV=1	354590000	281230000	249680000	11651000	4665700	3700400	3285300	366490000	319990000	400070000	16	16	16	17.1	17.1	17.1	160.96	0	29.368	885510000	30	11	10	9	12	13	9	12	13	9	12	13	9
120	Q3TLU0;A2ABY3;Q540F5;Q3USD5;Q922E4;Q9CTB5	Q3TLU0;A2ABY3;Q540F5;Q3USD5;Q922E4	Ethanolamine-phosphate cytidylyltransferase	Pcyt2	tr|Q3TLU0|Q3TLU0_MOUSE Putative uncharacterized protein OS=Mus musculus GN=Pcyt2 PE=2 SV=1;tr|A2ABY3|A2ABY3_MOUSE Ethanolamine-phosphate cytidylyltransferase OS=Mus musculus GN=Pcyt2 PE=4 SV=1;tr|Q540F5|Q540F5_MOUSE CTP:ethanolaminephosphate cytidylyltrans	124520000	48997000	17942000	7363900	4789300	1884500	690070	69480000	83805000	68388000	4	4	4	13.7	13.7	13.7	43.46	0.00032342	2.8415	191460000	7	3	2	2	4	3	2	4	3	2	4	3	2
121	A2AC07;Q8C4X1;Q8C4X1-3;Q8C4X1-2	A2AC07;Q8C4X1;Q8C4X1-3;Q8C4X1-2	Centromere protein X	Stra13	tr|A2AC07|A2AC07_MOUSE Centromere protein X OS=Mus musculus GN=Stra13 PE=4 SV=1;sp|Q8C4X1|CENPX_MOUSE Centromere protein X OS=Mus musculus GN=Stra13 PE=2 SV=1;sp|Q8C4X1-3|CENPX_MOUSE Isoform 3 of Centromere protein X OS=Mus musculus GN=Stra13;sp|Q8C4X1-2|C	14691000	0	0	1836400	1836400	0	0	14060000	0	0	1	1	1	12.3	12.3	12.3	13.107	0.0028375	1.71	14691000	1	1	0	0	1	0	0	1	0	0	1	0	0
122	A2AC19;O54864-3;O54864;O54864-2	A2AC19;O54864-3;O54864;O54864-2	Histone-lysine N-methyltransferase SUV39H1	Suv39h1	tr|A2AC19|A2AC19_MOUSE Histone-lysine N-methyltransferase SUV39H1 OS=Mus musculus GN=Suv39h1 PE=1 SV=1;sp|O54864-3|SUV91_MOUSE Isoform 3 of Histone-lysine N-methyltransferase SUV39H1 OS=Mus musculus GN=Suv39h1;sp|O54864|SUV91_MOUSE Histone-lysine N-methylt	9806300	42964000	36121000	4444600	490320	2148200	1806100	31487000	0	29470000	5	5	5	19.4	19.4	19.4	47.767	0.0093391	1.1892	88892000	3	1	0	2	1	2	3	1	2	3	1	2	3
123	F8WHN4;A2ACC6;E9Q0J2;B2RRF1;Q8BQZ4;A2ACC7;Q8BQZ4-2	F8WHN4;A2ACC6;E9Q0J2;B2RRF1;Q8BQZ4;A2ACC7;Q8BQZ4-2	Ral GTPase-activating protein subunit beta	Ralgapb	tr|F8WHN4|F8WHN4_MOUSE Ral GTPase-activating protein subunit beta OS=Mus musculus GN=Ralgapb PE=4 SV=1;tr|A2ACC6|A2ACC6_MOUSE Ral GTPase-activating protein subunit beta OS=Mus musculus GN=Ralgapb PE=4 SV=1;tr|E9Q0J2|E9Q0J2_MOUSE Ral GTPase-activating prote	88482000	77496000	138260000	3665500	1066000	933690	1665700	108820000	87087000	139030000	7	7	7	9	9	9	166.17	0	37.737	304230000	13	5	3	5	5	3	5	5	3	5	5	3	5
124	Q61833;A2ACG7;Q3U505;Q9DBG6	Q61833;A2ACG7;Q3U505;Q9DBG6	Dolichyl-diphosphooligosaccharide--protein glycosyltransferase subunit 2	Rpn2	tr|Q61833|Q61833_MOUSE Ribophorin OS=Mus musculus GN=Rpn2 PE=2 SV=1;tr|A2ACG7|A2ACG7_MOUSE Dolichyl-diphosphooligosaccharide--protein glycosyltransferase subunit 2 OS=Mus musculus GN=Rpn2 PE=4 SV=1;tr|Q3U505|Q3U505_MOUSE Putative uncharacterized protein (F	22249000000	22135000000	25407000000	2406600000	767220000	763290000	876090000	28461000000	26651000000	29122000000	25	25	25	56.3	56.3	56.3	66.301	0	323.31	69791000000	224	73	75	76	23	24	24	23	24	24	23	24	24
125	A4FUW1;A2ACM0;Q8K4Q0;Q8K4Q0-2;E9PXZ5;Q8K4Q0-3;Q8K4Q0-5;F7BQS0;A7MAY7;Q6ZPU3;Q8K4Q0-4;F6U5L3;F7CN67	A4FUW1;A2ACM0;Q8K4Q0;Q8K4Q0-2	Regulatory-associated protein of mTOR	Rptor	tr|A4FUW1|A4FUW1_MOUSE 4932417H02Rik protein (Fragment) OS=Mus musculus GN=Rptor PE=2 SV=1;tr|A2ACM0|A2ACM0_MOUSE Regulatory-associated protein of mTOR OS=Mus musculus GN=Rptor PE=1 SV=1;sp|Q8K4Q0|RPTOR_MOUSE Regulatory-associated protein of mTOR OS=Mus mu	459080000	476320000	557150000	21949000	6751200	7004600	8193400	539220000	636070000	698210000	16	16	16	20.3	20.3	20.3	149.24	0	51.36	1492500000	47	14	16	17	11	12	13	11	12	13	11	12	13
126	Q8K1G9;A2ACQ1;A2ACP9	Q8K1G9;A2ACQ1		Dhx35	tr|Q8K1G9|Q8K1G9_MOUSE DEAH (Asp-Glu-Ala-His) box polypeptide 35 OS=Mus musculus GN=Dhx35 PE=2 SV=1;tr|A2ACQ1|A2ACQ1_MOUSE Protein Dhx35 OS=Mus musculus GN=Dhx35 PE=4 SV=1	47662000	61031000	23452000	3775600	1361800	1743700	670070	46170000	58747000	59168000	5	5	5	10.2	10.2	10.2	75.876	0.0022683	1.9344	132150000	5	2	2	1	3	3	1	3	3	1	3	3	1
127	A2ACV6;E1U8D0;Q69ZW6;Q8CBB8;B8JJI7;H3BL83;Q3UHU5-2;Q3UHU5-3;Q3UHU5	A2ACV6;E1U8D0	Protein SOGA1;N-terminal form;C-terminal 80 kDa form	Soga1	tr|A2ACV6|A2ACV6_MOUSE Protein SOGA1 OS=Mus musculus GN=Soga1 PE=4 SV=1;sp|E1U8D0|SOGA1_MOUSE Protein SOGA1 OS=Mus musculus GN=Soga1 PE=1 SV=3	244510000	200910000	143090000	5208100	2163800	1778000	1266300	252290000	230260000	220130000	22	21	20	15.5	15.2	14.6	183.14	0	33.895	588510000	26	11	10	5	15	12	7	14	11	6	13	11	6
128	A2AD03;Q3UR39;Q9QXG2;Q8CBI2;Q9CS14	A2AD03;Q3UR39;Q9QXG2;Q8CBI2	Rab proteins geranylgeranyltransferase component A 1	Chm	tr|A2AD03|A2AD03_MOUSE Rab proteins geranylgeranyltransferase component A 1 OS=Mus musculus GN=Chm PE=4 SV=1;tr|Q3UR39|Q3UR39_MOUSE Rab proteins geranylgeranyltransferase component A 1 OS=Mus musculus GN=Chm PE=2 SV=1;sp|Q9QXG2|RAE1_MOUSE Rab proteins gera	517950000	675760000	769840000	61361000	16186000	21117000	24058000	654890000	870510000	734900000	11	11	10	29.6	29.6	28.4	73.663	0	36.902	1963500000	35	10	13	12	7	9	8	7	9	8	6	8	8
129	A2AD84;A2AD85;Q99JT2	A2AD84;A2AD85;Q99JT2	Serine/threonine-protein kinase 26	Stk26	tr|A2AD84|A2AD84_MOUSE Protein 2610018G03Rik OS=Mus musculus GN=2610018G03Rik PE=4 SV=1;tr|A2AD85|A2AD85_MOUSE Uncharacterized protein OS=Mus musculus GN=2610018G03Rik PE=2 SV=1;sp|Q99JT2|MST4_MOUSE Serine/threonine-protein kinase MST4 OS=Mus musculus GN=M	47321000	31342000	35220000	5176500	2151000	1424700	1600900	0	42745000	0	8	1	0	21.7	3.3	0	43.952	0.0021241	2.0005	113880000	0	0	0	0	6	8	7	1	1	1	0	0	0
130	A2AD97;Q9DBV4	A2AD97;Q9DBV4	Matrix-remodeling-associated protein 8	Mxra8	tr|A2AD97|A2AD97_MOUSE Matrix-remodeling-associated protein 8 (Fragment) OS=Mus musculus GN=Mxra8 PE=4 SV=2;sp|Q9DBV4|MXRA8_MOUSE Matrix-remodeling-associated protein 8 OS=Mus musculus GN=Mxra8 PE=2 SV=1	24712000	0	0	1235600	1235600	0	0	26486000	0	0	2	2	2	9.6	9.6	9.6	34.987	0	11.371	24712000	1	0	0	1	2	0	1	2	0	1	2	0	1
131	A2ADA5;A2ADA5-2;A2ADA5-3	A2ADA5;A2ADA5-2	tRNA pseudouridine synthase-like 1	Pusl1	sp|A2ADA5|PUSL1_MOUSE tRNA pseudouridine synthase-like 1 OS=Mus musculus GN=Pusl1 PE=2 SV=1;sp|A2ADA5-2|PUSL1_MOUSE Isoform 2 of tRNA pseudouridine synthase-like 1 OS=Mus musculus GN=Pusl1	270220000	371520000	263470000	60347000	18015000	24768000	17564000	400310000	448630000	442620000	5	5	5	25.4	25.4	25.4	31.992	0	13.631	905200000	20	6	7	7	4	4	3	4	4	3	4	4	3
132	Q4QQN0;A2ADA6;Q6NXL5;Q3UH98	Q4QQN0;A2ADA6;Q6NXL5;Q3UH98		Acap3	tr|Q4QQN0|Q4QQN0_MOUSE Acap3 protein OS=Mus musculus GN=Acap3 PE=2 SV=1;tr|A2ADA6|A2ADA6_MOUSE Protein Acap3 OS=Mus musculus GN=Acap3 PE=4 SV=1;tr|Q6NXL5|Q6NXL5_MOUSE ArfGAP with coiled-coil, ankyrin repeat and PH domains 3 OS=Mus musculus GN=Acap3 PE=2 SV	0	22583000	28365000	1306300	0	579050	727300	0	30495000	30871000	3	2	2	6.4	4.8	4.8	70.84	0.00093095	2.3227	50947000	4	0	2	2	1	3	3	0	2	2	0	2	2
133	A2ADB1;A2ADB0;Q62504-3;Q62504-2;Q62504	A2ADB1;A2ADB0;Q62504-3;Q62504-2;Q62504	Msx2-interacting protein	Spen	tr|A2ADB1|A2ADB1_MOUSE Msx2-interacting protein OS=Mus musculus GN=Spen PE=1 SV=1;tr|A2ADB0|A2ADB0_MOUSE Msx2-interacting protein OS=Mus musculus GN=Spen PE=1 SV=1;sp|Q62504-3|MINT_MOUSE Isoform 3 of Msx2-interacting protein OS=Mus musculus GN=Spen;sp|Q625	38996000	28329000	59874000	639190	195960	142360	300870	48912000	0	0	7	7	7	3.2	3.2	3.2	395.98	0	7.1762	127200000	4	1	1	2	2	3	3	2	3	3	2	3	3
134	A2ADE0;Z4YJW6;Q80TQ5;Q80TQ5-2;Q80TQ5-3	A2ADE0;Z4YJW6;Q80TQ5;Q80TQ5-2;Q80TQ5-3	Pleckstrin homology domain-containing family M member 2	Plekhm2	tr|A2ADE0|A2ADE0_MOUSE Pleckstrin homology domain-containing family M member 2 OS=Mus musculus GN=Plekhm2 PE=4 SV=1;tr|Z4YJW6|Z4YJW6_MOUSE Pleckstrin homology domain-containing family M member 2 OS=Mus musculus GN=Plekhm2 PE=4 SV=1;sp|Q80TQ5|PKHM2_MOUSE Pl	54351000	107710000	123200000	6483400	1235200	2448000	2800100	95394000	123750000	123920000	7	7	7	9.5	9.5	9.5	112.15	0	10.634	285270000	12	2	3	7	3	3	5	3	3	5	3	3	5
135	F6TBV1;F6WHL0;A2ADH1;Q9CQY5-2;Q9CQY5-3;Q9CQY5	F6TBV1;F6WHL0;A2ADH1;Q9CQY5-2;Q9CQY5-3;Q9CQY5	Magnesium transporter protein 1	Magt1	tr|F6TBV1|F6TBV1_MOUSE Magnesium transporter protein 1 (Fragment) OS=Mus musculus GN=Magt1 PE=4 SV=1;tr|F6WHL0|F6WHL0_MOUSE Magnesium transporter protein 1 (Fragment) OS=Mus musculus GN=Magt1 PE=4 SV=1;tr|A2ADH1|A2ADH1_MOUSE Magnesium transporter protein 1	739330000	837180000	823540000	141180000	43490000	49246000	48444000	883100000	977540000	991520000	7	7	7	19.2	19.2	19.2	35.154	0	13.513	2400100000	20	5	7	8	5	6	6	5	6	6	5	6	6
136	A2ADR8;Q8R3G1	A2ADR8;Q8R3G1	Nuclear inhibitor of protein phosphatase 1	Ppp1r8	tr|A2ADR8|A2ADR8_MOUSE Nuclear inhibitor of protein phosphatase 1 OS=Mus musculus GN=Ppp1r8 PE=4 SV=1;sp|Q8R3G1|PP1R8_MOUSE Nuclear inhibitor of protein phosphatase 1 OS=Mus musculus GN=Ppp1r8 PE=1 SV=1	1865900000	1633000000	1909000000	318110000	109760000	96057000	112300000	2095300000	2035800000	2289200000	11	11	11	48	48	48	38.399	0	62.127	5407900000	58	19	21	18	10	11	9	10	11	9	10	11	9
137	A2ADY9	A2ADY9	Protein DDI1 homolog 2	Ddi2	sp|A2ADY9|DDI2_MOUSE Protein DDI1 homolog 2 OS=Mus musculus GN=Ddi2 PE=1 SV=1	1722000000	1728000000	1860100000	212410000	68882000	69118000	74406000	2127900000	2033900000	2203400000	13	13	13	48.4	48.4	48.4	44.59	0	75.934	5310200000	52	18	18	16	12	11	11	12	11	11	12	11	11
138	A2AE27;Q9DBT5	A2AE27;Q9DBT5	AMP deaminase 2	Ampd2	tr|A2AE27|A2AE27_MOUSE AMP deaminase 2 OS=Mus musculus GN=Ampd2 PE=1 SV=1;sp|Q9DBT5|AMPD2_MOUSE AMP deaminase 2 OS=Mus musculus GN=Ampd2 PE=1 SV=1	1093400000	895970000	927260000	64814000	24298000	19910000	20606000	1144300000	1240500000	1167200000	18	18	18	23.9	23.9	23.9	94.695	0	30.168	2916600000	52	19	13	20	14	14	14	14	14	14	14	14	14
139	A2AEG6;A2AEG3;P35803;P35803-2;H3BIV8;P35803-7;P35803-6	A2AEG6;A2AEG3;P35803;P35803-2	Neuronal membrane glycoprotein M6-b	Gpm6b	tr|A2AEG6|A2AEG6_MOUSE Glycoprotein m6b, isoform CRA_g OS=Mus musculus GN=Gpm6b PE=1 SV=1;tr|A2AEG3|A2AEG3_MOUSE Glycoprotein m6b, isoform CRA_a OS=Mus musculus GN=Gpm6b PE=4 SV=1;sp|P35803|GPM6B_MOUSE Neuronal membrane glycoprotein M6-b OS=Mus musculus GN	117050000	147790000	247850000	42724000	9754600	12315000	20654000	189910000	203070000	203190000	5	5	1	23.2	23.2	4	36.196	0	18.335	512690000	12	3	4	5	4	4	5	4	4	5	1	0	1
140	A2AEK1;B3V099;A2AEJ8;F6ZKC7	A2AEK1;B3V099		Cstf2	tr|A2AEK1|A2AEK1_MOUSE AlphaCstF-64 variant 4 OS=Mus musculus GN=Cstf2 PE=2 SV=1;tr|B3V099|B3V099_MOUSE BetaCstF-64 variant 1 OS=Mus musculus GN=Cstf2 PE=2 SV=1	0	33232000	0	1444900	0	1444900	0	0	34650000	0	12	1	1	29.2	1.8	1.8	58.571	0.0034201	1.6386	33232000	1	0	1	0	10	8	9	0	1	0	0	1	0
141	A2AEM2;Q99LI2;Z4YMG1	A2AEM2;Q99LI2	Chloride channel CLIC-like protein 1	Clcc1	tr|A2AEM2|A2AEM2_MOUSE Chloride channel CLIC-like 1, isoform CRA_a OS=Mus musculus GN=Clcc1 PE=1 SV=1;sp|Q99LI2|CLCC1_MOUSE Chloride channel CLIC-like protein 1 OS=Mus musculus GN=Clcc1 PE=1 SV=1	670210000	486380000	925790000	61246000	19712000	14305000	27229000	680700000	691220000	669260000	15	15	15	39.5	39.5	39.5	61.239	0	54.665	2082400000	43	14	14	15	13	10	11	13	10	11	13	10	11
142	Q3UIP1;A2AER4;Q9R0M8	Q3UIP1;A2AER4;Q9R0M8	UDP-galactose translocator	Slc35a2	tr|Q3UIP1|Q3UIP1_MOUSE Solute carrier family 35 (UDP-galactose transporter), member 2, isoform CRA_c OS=Mus musculus GN=Slc35a2 PE=2 SV=1;tr|A2AER4|A2AER4_MOUSE UDP-galactose translocator OS=Mus musculus GN=Slc35a2 PE=4 SV=1;sp|Q9R0M8|S35A2_MOUSE UDP-galac	63721000	42789000	58184000	11764000	4551500	3056300	4156000	94319000	90624000	80659000	1	1	1	7.2	7.2	7.2	40.765	0	4.3516	164690000	6	2	3	1	1	1	1	1	1	1	1	1	1
143	A2AER7;Q91VJ5;A2AER8;A2AER9	A2AER7;Q91VJ5;A2AER8	Polyglutamine-binding protein 1	Pqbp1	tr|A2AER7|A2AER7_MOUSE Pqbp1 protein OS=Mus musculus GN=Pqbp1 PE=2 SV=1;sp|Q91VJ5|PQBP1_MOUSE Polyglutamine-binding protein 1 OS=Mus musculus GN=Pqbp1 PE=1 SV=1;tr|A2AER8|A2AER8_MOUSE Polyglutamine-binding protein 1 (Fragment) OS=Mus musculus GN=Pqbp1 PE=4	177600000	184170000	200200000	56196000	17760000	18417000	20020000	223560000	201260000	233410000	5	5	5	25.9	25.9	25.9	30.597	0	23.563	561960000	17	7	4	6	3	4	4	3	4	4	3	4	4
144	Q3TDY8;A2AES3;A2AES5;A2AES4;Q3U2S4-2;Q3U2S4	Q3TDY8;A2AES3;A2AES5;A2AES4;Q3U2S4-2;Q3U2S4	OTU domain-containing protein 5	Otud5	tr|Q3TDY8|Q3TDY8_MOUSE Putative uncharacterized protein (Fragment) OS=Mus musculus GN=Otud5 PE=2 SV=1;tr|A2AES3|A2AES3_MOUSE OTU domain-containing protein 5 OS=Mus musculus GN=Otud5 PE=4 SV=1;tr|A2AES5|A2AES5_MOUSE OTU domain-containing protein 5 OS=Mus mu	16251000	17458000	14252000	1844700	625050	671450	548160	19173000	24866000	19360000	2	2	2	5.8	5.8	5.8	55.86	0.00047824	2.6438	47961000	3	1	1	1	2	1	1	2	1	1	2	1	1
145	A2AEW0;Q3U1L5;A2AEW1;Q64092-4;Q64092;Q64092-3;Q64092-2;Q05BT8;A2AEW2;Q8K420;I6L9I6;Q8C6Y4;Q32MU7;E9PZ28;E9QL92;Q3U2D2;Q9WTW4;Q08874-6;Q08874-5;Q08874-9;Q08874-8;Q08874-3;Q08874-7;Q08874-2;Q08874-4;Q08874	A2AEW0;Q3U1L5;A2AEW1;Q64092-4;Q64092;Q64092-3;Q64092-2	Transcription factor E3	Tfe3	tr|A2AEW0|A2AEW0_MOUSE Transcription factor E3 OS=Mus musculus GN=Tfe3 PE=4 SV=1;tr|Q3U1L5|Q3U1L5_MOUSE Putative uncharacterized protein (Fragment) OS=Mus musculus GN=Tfe3 PE=2 SV=1;tr|A2AEW1|A2AEW1_MOUSE Transcription factor E3 OS=Mus musculus GN=Tfe3 PE=	71530000	112570000	57783000	11518000	3406200	5360400	2751600	93671000	100210000	101910000	5	5	5	18.8	18.8	18.8	57.736	0	14.966	241880000	9	3	4	2	3	4	2	3	4	2	3	4	2
146	A2AEX8;A2AEX6;P97447;A2AEY1;A2AEY0;A2AEX9;Q9DAH0;Q8CDC8;Q6P8P1;O70403	A2AEX8;A2AEX6;P97447;A2AEY1	Four and a half LIM domains protein 1	Fhl1	tr|A2AEX8|A2AEX8_MOUSE Four and a half LIM domains 1, isoform CRA_b OS=Mus musculus GN=Fhl1 PE=1 SV=1;tr|A2AEX6|A2AEX6_MOUSE Four and a half LIM domains protein 1 OS=Mus musculus GN=Fhl1 PE=1 SV=1;sp|P97447|FHL1_MOUSE Four and a half LIM domains protein 1	13188000000	13481000000	14247000000	2153400000	694090000	709500000	749850000	14454000000	17502000000	16999000000	15	15	4	61.1	61.1	17.2	33.563	0	79.422	40915000000	151	53	48	50	15	14	14	15	14	14	4	4	4
147	A2AEY2;A2AEX7;P97447-2	A2AEY2;A2AEX7;P97447-2	Four and a half LIM domains protein 1	Fhl1	tr|A2AEY2|A2AEY2_MOUSE Four and a half LIM domains 1, isoform CRA_c OS=Mus musculus GN=Fhl1 PE=1 SV=1;tr|A2AEX7|A2AEX7_MOUSE Four and a half LIM domains protein 1 OS=Mus musculus GN=Fhl1 PE=1 SV=1;sp|P97447-2|FHL1_MOUSE Isoform 2 of Four and a half LIM dom	19873000	18367000	25390000	2766600	864060	798570	1103900	20644000	19564000	22060000	12	1	1	42.7	2.5	2.5	36.261	1	-2	63631000	2	1	0	1	12	11	11	1	1	1	1	1	1
148	A2AF81;Q8N9S3-3;Q8N9S3;F6S1R2;A2AF82;Q8N9S3-2	A2AF81;Q8N9S3-3;Q8N9S3;F6S1R2;A2AF82;Q8N9S3-2	Activator of 90 kDa heat shock protein ATPase homolog 2	Ahsa2	tr|A2AF81|A2AF81_MOUSE Activator of 90 kDa heat shock protein ATPase homolog 2 (Fragment) OS=Mus musculus GN=Ahsa2 PE=4 SV=1;sp|Q8N9S3-3|AHSA2_MOUSE Isoform 3 of Activator of 90 kDa heat shock protein ATPase homolog 2 OS=Mus musculus GN=Ahsa2;sp|Q8N9S3|AHS	21655000	89836000	145480000	17131000	1443600	5989100	9698500	0	139780000	97986000	6	5	5	33	30	30	22.402	0	5.6513	256970000	7	1	3	3	2	3	5	1	2	4	1	2	4
149	A2AFG7;A2AFG8;Q6PGJ3;P11627;Q9QYQ7;F6UIL7;F7A5H7;Q684Q2;B7ZCD3	A2AFG7;A2AFG8;Q6PGJ3;P11627	Neural cell adhesion molecule L1	L1cam	tr|A2AFG7|A2AFG7_MOUSE Neural cell adhesion molecule L1 OS=Mus musculus GN=L1cam PE=4 SV=1;tr|A2AFG8|A2AFG8_MOUSE Neural cell adhesion molecule L1 OS=Mus musculus GN=L1cam PE=4 SV=1;tr|Q6PGJ3|Q6PGJ3_MOUSE L1 cell adhesion molecule OS=Mus musculus GN=L1cam	295760000	297510000	245080000	12513000	4414400	4440500	3658000	401730000	305710000	290890000	14	14	14	18.2	18.2	18.2	139.82	0	52.755	838360000	27	10	9	8	8	9	10	8	9	10	8	9	10
150	A2AFK4;I6L986	A2AFK4;I6L986		Mtg2	tr|A2AFK4|A2AFK4_MOUSE GTP binding protein 5, isoform CRA_a OS=Mus musculus GN=Mtg2 PE=3 SV=1;tr|I6L986|I6L986_MOUSE Gtpbp5 protein OS=Mus musculus GN=Mtg2 PE=2 SV=1	7504100	0	22761000	1210600	300160	0	910450	14238000	0	19616000	2	2	2	9.4	9.4	9.4	44.003	0.000172	3.8705	30265000	3	1	0	2	1	0	2	1	0	2	1	0	2
151	A2AFQ0;Q7TMY8;Q7TMY8-3;Q4JG03;Q7TMY8-4;Q7TMY8-2;Q8BKX3;F6XP90;Q8C0G8;F6UYC1;Q9CU76;Q3TL29	A2AFQ0;Q7TMY8;Q7TMY8-3;Q4JG03;Q7TMY8-4;Q7TMY8-2	E3 ubiquitin-protein ligase HUWE1	Huwe1	tr|A2AFQ0|A2AFQ0_MOUSE E3 ubiquitin-protein ligase HUWE1 OS=Mus musculus GN=Huwe1 PE=1 SV=1;sp|Q7TMY8|HUWE1_MOUSE E3 ubiquitin-protein ligase HUWE1 OS=Mus musculus GN=Huwe1 PE=1 SV=5;sp|Q7TMY8-3|HUWE1_MOUSE Isoform 3 of E3 ubiquitin-protein ligase HUWE1 OS	5704100000	6048700000	6499100000	88602000	27690000	29363000	31549000	7213700000	7568100000	7617900000	88	88	67	28.3	28.3	21.8	482.69	0	323.31	18252000000	335	109	114	112	69	71	69	69	71	69	53	54	51
152	Q99N15;A2AFQ2;Q9CYT3;O08756	Q99N15;A2AFQ2;Q9CYT3;O08756	3-hydroxyacyl-CoA dehydrogenase type-2	Hsd17b10	tr|Q99N15|Q99N15_MOUSE 17beta-hydroxysteroid dehydrogenase type 10/short chain L-3-hydroxyacyl-CoA dehydrogenase OS=Mus musculus GN=Hsd17b10 PE=1 SV=1;tr|A2AFQ2|A2AFQ2_MOUSE 3-hydroxyacyl-CoA dehydrogenase type-2 OS=Mus musculus GN=Hsd17b10 PE=1 SV=1;tr|Q9	4534400000	4614600000	4836300000	874080000	283400000	288410000	302270000	5760500000	5412700000	5512100000	15	15	15	76.2	76.2	76.2	27.273	0	127.54	13985000000	116	37	37	42	14	15	15	14	15	15	14	15	15
153	A2AFQ9;E9PUU4;Q8BX17;B2RQ83;B7ZN04;Q6KAS0;Q3TR97;F7CKD6	A2AFQ9;E9PUU4;Q8BX17;B2RQ83;B7ZN04;Q6KAS0;Q3TR97	Gem-associated protein 5	Gemin5	tr|A2AFQ9|A2AFQ9_MOUSE Gem-associated protein 5 OS=Mus musculus GN=Gemin5 PE=4 SV=1;tr|E9PUU4|E9PUU4_MOUSE Gem-associated protein 5 OS=Mus musculus GN=Gemin5 PE=4 SV=1;sp|Q8BX17|GEMI5_MOUSE Gem-associated protein 5 OS=Mus musculus GN=Gemin5 PE=2 SV=2;tr|B2	2557600000	2891900000	2903800000	90796000	27800000	31434000	31563000	3042200000	3684600000	3366800000	37	37	37	32.6	32.6	32.6	166.52	0	130.31	8353300000	129	39	43	47	31	31	31	31	31	31	31	31	31
154	O54817;A2AG22;O88933;Q9Z2U3	O54817;A2AG22;O88933;Q9Z2U3		Esx1	tr|O54817|O54817_MOUSE Paired-like homeodomain containing protein OS=Mus musculus GN=Esx1 PE=2 SV=1;tr|A2AG22|A2AG22_MOUSE Protein Esx1 OS=Mus musculus GN=Esx1 PE=4 SV=1;tr|O88933|O88933_MOUSE Homeobox protein SPX1 OS=Mus musculus GN=Esx1 PE=2 SV=1;tr|Q9Z2	46746000	22108000	0	6259400	4249600	2009800	0	62337000	55700000	0	1	1	1	2.9	2.9	2.9	35.968	0.0069727	1.3211	68854000	2	1	1	0	1	1	0	1	1	0	1	1	0
155	B9EJ97;A2AG68;Q64430;Q3TAY6;Q3T9Y7;B1AQ57;Q64446	B9EJ97;A2AG68;Q64430	Copper-transporting ATPase 1	Atp7a	tr|B9EJ97|B9EJ97_MOUSE Atp7a protein OS=Mus musculus GN=Atp7a PE=2 SV=1;tr|A2AG68|A2AG68_MOUSE Copper-transporting ATPase 1 OS=Mus musculus GN=Atp7a PE=1 SV=1;sp|Q64430|ATP7A_MOUSE Copper-transporting ATPase 1 OS=Mus musculus GN=Atp7a PE=1 SV=3	325040000	285720000	155260000	10943000	4643500	4081800	2218100	344920000	326480000	305270000	9	9	9	9.4	9.4	9.4	161.98	0	31.21	766030000	21	6	8	7	5	6	7	5	6	7	5	6	7
156	A2AGH8;A2AGH9;A2AGH6-2;A2AGH6;A2AGH6-3;Q2NLB9;Q8BQM9;Q8BQM9-2;Q6ZPK9	A2AGH8;A2AGH9;A2AGH6-2;A2AGH6	Mediator of RNA polymerase II transcription subunit 12	Med12	tr|A2AGH8|A2AGH8_MOUSE Mediator of RNA polymerase II transcription subunit 12 OS=Mus musculus GN=Med12 PE=1 SV=1;tr|A2AGH9|A2AGH9_MOUSE Mediator of RNA polymerase II transcription subunit 12 OS=Mus musculus GN=Med12 PE=1 SV=1;sp|A2AGH6-2|MED12_MOUSE Isofor	259480000	305600000	365350000	7952400	2217800	2612000	3122700	381910000	356440000	406850000	22	22	22	15.5	15.5	15.5	240.87	0	26.336	930440000	38	10	12	16	11	13	17	11	13	17	11	13	17
157	A2AGL5;Q496R6;Q9D9K3;Q496S6	A2AGL5;Q496R6;Q9D9K3;Q496S6	Cell death regulator Aven	Aven	tr|A2AGL5|A2AGL5_MOUSE Apoptosis, caspase activation inhibitor, isoform CRA_c OS=Mus musculus GN=Aven PE=4 SV=1;tr|Q496R6|Q496R6_MOUSE Aven protein (Fragment) OS=Mus musculus GN=Aven PE=2 SV=1;sp|Q9D9K3|AVEN_MOUSE Cell death regulator Aven OS=Mus musculus	63952000	86434000	55399000	15830000	4919400	6648700	4261400	56260000	85201000	75221000	3	3	3	23.5	23.5	23.5	24.072	0	4.3839	205780000	5	2	2	1	2	2	1	2	2	1	2	2	1
158	A6PWP8;A2AGR1;A2AGQ3;A2AGQ2;A2AGQ8;A2AGQ7;A2AGQ9;A2AGR0;A2AGQ5;A2AGQ6;E9QN47;A2AGQ4;Q80U28-13;Q80U28-12;Q80U28-11;Q80U28-10;Q80U28-9;Q80U28-8;Q80U28-7;Q80U28-6;Q80U28-5;Q80U28-4;Q80U28-3;Q80U28-2;Q80U28-15;Q80U28;Q80U28-14	A6PWP8;A2AGR1;A2AGQ3;A2AGQ2;A2AGQ8;A2AGQ7;A2AGQ9;A2AGR0;A2AGQ5;A2AGQ6;E9QN47;A2AGQ4;Q80U28-13;Q80U28-12;Q80U28-11;Q80U28-10;Q80U28-9;Q80U28-8;Q80U28-7;Q80U28-6;Q80U28-5;Q80U28-4;Q80U28-3;Q80U28-2;Q80U28-15;Q80U28;Q80U28-14	MAP kinase-activating death domain protein	Madd	tr|A6PWP8|A6PWP8_MOUSE MAP kinase-activating death domain protein OS=Mus musculus GN=Madd PE=4 SV=1;tr|A2AGR1|A2AGR1_MOUSE MAP kinase-activating death domain protein OS=Mus musculus GN=Madd PE=1 SV=1;tr|A2AGQ3|A2AGQ3_MOUSE MAP kinase-activating death domai	14199000	0	0	262950	262950	0	0	14199000	0	0	1	1	1	1.1	1.1	1.1	123.36	0.00032927	3.0686	14199000	2	1	0	1	1	0	1	1	0	1	1	0	1
159	A2AGS2;Q3UU57;Q8BP44;Q543Z5;P70236;Q60521;Q8C371;P70273	A2AGS2;Q3UU57;Q8BP44;Q543Z5;P70236;Q60521;Q8C371	Dual specificity mitogen-activated protein kinase kinase 6	Map2k6	tr|A2AGS2|A2AGS2_MOUSE Dual-specificity mitogen-activated protein kinase kinase 6 OS=Mus musculus GN=Map2k6 PE=3 SV=1;tr|Q3UU57|Q3UU57_MOUSE Putative uncharacterized protein (Fragment) OS=Mus musculus GN=Map2k6 PE=2 SV=1;tr|Q8BP44|Q8BP44_MOUSE Putative unc	71020000	12455000	9959600	4247000	3228200	566120	452710	34195000	42487000	28573000	5	3	3	20.1	11.9	11.9	32.773	0	5.0739	93435000	7	3	2	2	4	2	2	3	2	1	3	2	1
160	A2AGT5-3;A2AGT5;A2AGT5-2;Q6PB55;Q8K250;Q4V782	A2AGT5-3;A2AGT5;A2AGT5-2	Cytoskeleton-associated protein 5	Ckap5	sp|A2AGT5-3|CKAP5_MOUSE Isoform 3 of Cytoskeleton-associated protein 5 OS=Mus musculus GN=Ckap5;sp|A2AGT5|CKAP5_MOUSE Cytoskeleton-associated protein 5 OS=Mus musculus GN=Ckap5 PE=2 SV=1;sp|A2AGT5-2|CKAP5_MOUSE Isoform 2 of Cytoskeleton-associated protein	1680900	0	0	13778	13778	0	0	2702600	0	0	80	1	1	45.6	1	1	223.52	1	-2	1680900	1	1	0	0	62	64	65	1	0	0	1	0	0
161	A2AH22-7;A2AH22-2;A2AH22-6;A2AH22;A2AH22-5;A2AH22-4;A2AH22-3	A2AH22-7;A2AH22-2;A2AH22-6;A2AH22;A2AH22-5;A2AH22-4;A2AH22-3	Activating molecule in BECN1-regulated autophagy protein 1	Ambra1	sp|A2AH22-7|AMRA1_MOUSE Isoform 7 of Activating molecule in BECN1-regulated autophagy protein 1 OS=Mus musculus GN=Ambra1;sp|A2AH22-2|AMRA1_MOUSE Isoform 2 of Activating molecule in BECN1-regulated autophagy protein 1 OS=Mus musculus GN=Ambra1;sp|A2AH22-6|	52216000	30184000	50128000	2208800	870260	503070	835470	83209000	34464000	53211000	5	5	5	4.7	4.7	4.7	129.87	0	4.1507	132530000	6	1	2	3	2	2	3	2	2	3	2	2	3
162	Q8BQW4;A2AH25;Q5FWK3;Q8C5A0	Q8BQW4;A2AH25;Q5FWK3;Q8C5A0	Rho GTPase-activating protein 1	Arhgap1	tr|Q8BQW4|Q8BQW4_MOUSE Putative uncharacterized protein OS=Mus musculus GN=Arhgap1 PE=2 SV=1;tr|A2AH25|A2AH25_MOUSE Rho GTPase-activating protein 1 OS=Mus musculus GN=Arhgap1 PE=1 SV=1;sp|Q5FWK3|RHG01_MOUSE Rho GTPase-activating protein 1 OS=Mus musculus G	2868800000	2096500000	2571900000	251240000	95626000	69883000	85731000	2835700000	2967200000	2915900000	16	16	10	40.9	40.9	19.6	54.441	0	56.459	7537200000	75	25	24	26	15	13	13	15	13	13	10	8	8
163	A2AH75;Q60575-3;Q3UY61;Q6P5H4;E9QAN4;G3UW47;Q6TA13;Q3UH16;E9Q9G6;P33173;Q3UUN4;Q05BI6;Q05BP4;Q8BN53;Q5DTN3	A2AH75;Q60575-3;Q3UY61	Kinesin-like protein;Kinesin-like protein KIF1B	Kif1b	tr|A2AH75|A2AH75_MOUSE Kinesin family member 1B, isoform CRA_a OS=Mus musculus GN=Kif1b PE=3 SV=1;sp|Q60575-3|KIF1B_MOUSE Isoform 3 of Kinesin-like protein KIF1B OS=Mus musculus GN=Kif1b;tr|Q3UY61|Q3UY61_MOUSE Putative uncharacterized protein (Fragment) OS	73615000	56097000	80251000	2876200	1008400	768450	1099300	106590000	133650000	106160000	16	3	3	18.9	3	3	130.05	0	4.3379	209960000	4	2	0	2	12	8	13	3	1	2	3	1	2
164	A2AHC3;A2AHC4;A2AHC3-2;F6QF29;F6W3X2;F6Q2D3;V9GXT0;V9GXD7	A2AHC3;A2AHC4;A2AHC3-2	Calmodulin-regulated spectrin-associated protein 1	Camsap1	sp|A2AHC3|CAMP1_MOUSE Calmodulin-regulated spectrin-associated protein 1 OS=Mus musculus GN=Camsap1 PE=1 SV=1;tr|A2AHC4|A2AHC4_MOUSE Calmodulin-regulated spectrin-associated protein 1 (Fragment) OS=Mus musculus GN=Camsap1 PE=4 SV=1;sp|A2AHC3-2|CAMP1_MOUSE	668430000	421320000	433920000	14938000	6553200	4130600	4254100	689390000	602030000	652350000	20	20	20	18.3	18.3	18.3	175.89	0	46.954	1523700000	34	16	7	11	15	10	12	15	10	12	15	10	12
165	E9PV92;A2AHG4;E9QKW9;A2AHG2;Q6ZPK0-6;Q6ZPK0-8;Q6ZPK0-3;Q6ZPK0;F6U6L3;A2AHG3;D3Z764;Q6ZPK0-5;Q6ZPK0-7;Q6ZPK0-4;Q6ZPK0-9;Q6ZPK0-2;F6URE6;E0CZ36;E0CZ79;E0CYN5;F6TKP4	E9PV92;A2AHG4;E9QKW9;A2AHG2;Q6ZPK0-6;Q6ZPK0-8;Q6ZPK0-3;Q6ZPK0;F6U6L3;A2AHG3;D3Z764;Q6ZPK0-5;Q6ZPK0-7;Q6ZPK0-4;Q6ZPK0-9;Q6ZPK0-2	PHD finger protein 21A	Phf21a	tr|E9PV92|E9PV92_MOUSE PHD finger protein 21A OS=Mus musculus GN=Phf21a PE=4 SV=2;tr|A2AHG4|A2AHG4_MOUSE PHD finger protein 21A OS=Mus musculus GN=Phf21a PE=4 SV=1;tr|E9QKW9|E9QKW9_MOUSE PHD finger protein 21A OS=Mus musculus GN=Phf21a PE=4 SV=2;tr|A2AHG2|	118900000	55823000	95355000	6925100	3048700	1431400	2445000	112590000	121830000	105250000	5	5	5	11.3	11.3	11.3	67.776	0	10.796	270080000	10	3	3	4	4	3	4	4	3	4	4	3	4
166	A2AHJ7;A2AHK0;Q80UP3;Q91YS0	A2AHJ7;A2AHK0;Q80UP3;Q91YS0	Diacylglycerol kinase;Diacylglycerol kinase zeta	Dgkz	tr|A2AHJ7|A2AHJ7_MOUSE Diacylglycerol kinase OS=Mus musculus GN=Dgkz PE=3 SV=1;tr|A2AHK0|A2AHK0_MOUSE Diacylglycerol kinase OS=Mus musculus GN=Dgkz PE=3 SV=1;sp|Q80UP3|DGKZ_MOUSE Diacylglycerol kinase zeta OS=Mus musculus GN=Dgkz PE=1 SV=2;tr|Q91YS0|Q91YS0	41634000	20306000	19912000	1604900	816350	398160	390440	36730000	39605000	31144000	3	3	3	5.6	5.6	5.6	105.9	0.00033091	3.1409	81852000	8	2	3	3	2	1	2	2	1	2	2	1	2
167	Q6XZC3;Q4U221;Q60761;A2AHM0	Q6XZC3;Q4U221;Q60761;A2AHM0		Mageb2;Mageb1	tr|Q6XZC3|Q6XZC3_MOUSE MAGEB1/2 OS=Mus musculus PE=2 SV=1;tr|Q4U221|Q4U221_MOUSE Melanoma antigen, family B, 2 OS=Mus musculus GN=Mageb1 PE=2 SV=1;tr|Q60761|Q60761_MOUSE Protein Mageb1 OS=Mus musculus GN=Mageb1 PE=4 SV=3;tr|A2AHM0|A2AHM0_MOUSE Protein Mage	22514000	28377000	30633000	4529100	1250800	1576500	1701800	38144000	39492000	30504000	1	1	1	5.8	5.8	5.8	35.92	0.00032696	2.9651	81524000	3	1	1	1	1	1	1	1	1	1	1	1	1
168	A2AHX9;Q9QWX2;Q5HZH3;Q3T9W4;O35843;Q64373-2;Q64373-3;Q64373-4;Q64373;A2AHX7;A2AHX8;Q99N35;Q99N36	A2AHX9;Q9QWX2;Q5HZH3;Q3T9W4;O35843;Q64373-2;Q64373-3;Q64373-4;Q64373;A2AHX7;A2AHX8;Q99N35;Q99N36	Bcl-2-like protein 1	Bcl2l1;Bclx	tr|A2AHX9|A2AHX9_MOUSE Bcl-2-like protein 1 (Fragment) OS=Mus musculus GN=Bcl2l1 PE=4 SV=1;tr|Q9QWX2|Q9QWX2_MOUSE Bcl-2-like protein 1 (Fragment) OS=Mus musculus GN=Bcl2l1 PE=4 SV=1;tr|Q5HZH3|Q5HZH3_MOUSE BCL2-like 1 OS=Mus musculus GN=Bcl2l1 PE=2 SV=1;tr|	578830000	541740000	302180000	158080000	64315000	60193000	33576000	609280000	785190000	444190000	3	3	3	28.6	28.6	28.6	17.127	0	12.269	1422800000	17	6	6	5	3	3	2	3	3	2	3	3	2
169	Q6GTZ3;A2AHY3;P20067-2;P20067	Q6GTZ3;A2AHY3;P20067-2;P20067	DNA-binding protein inhibitor ID-1	Id1	tr|Q6GTZ3|Q6GTZ3_MOUSE Idb1 protein OS=Mus musculus GN=Id1 PE=2 SV=1;tr|A2AHY3|A2AHY3_MOUSE DNA-binding protein inhibitor ID-1 OS=Mus musculus GN=Id1 PE=4 SV=1;sp|P20067-2|ID1_MOUSE Isoform Short of DNA-binding protein inhibitor ID-1 OS=Mus musculus GN=Id1	60974000	39999000	25371000	18049000	8710600	5714200	3624500	49567000	60730000	32062000	2	2	2	19.6	19.6	19.6	15.56	0	4.7186	126340000	7	3	1	3	2	1	2	2	1	2	2	1	2
170	Q3UZ62;A2AI52;Q80U87;Q3UQ26;Q3TQM7;Q58E42	Q3UZ62;A2AI52;Q80U87;Q3UQ26	Ubiquitin carboxyl-terminal hydrolase;Ubiquitin carboxyl-terminal hydrolase 8	Usp8	tr|Q3UZ62|Q3UZ62_MOUSE Ubiquitin carboxyl-terminal hydrolase OS=Mus musculus GN=Usp8 PE=2 SV=1;tr|A2AI52|A2AI52_MOUSE Ubiquitin carboxyl-terminal hydrolase OS=Mus musculus GN=Usp8 PE=1 SV=1;sp|Q80U87|UBP8_MOUSE Ubiquitin carboxyl-terminal hydrolase 8 OS=Mu	418720000	322910000	336720000	15858000	6157700	4748700	4951700	400100000	379960000	437360000	13	13	13	17.3	17.3	17.3	122.65	0	18.152	1078400000	31	11	10	10	8	8	9	8	8	9	8	8	9
171	Q3URG0;A2AI78;Q80YA9-2;Q80YA9	Q3URG0;A2AI78;Q80YA9-2;Q80YA9	Connector enhancer of kinase suppressor of ras 2	Cnksr2	tr|Q3URG0|Q3URG0_MOUSE Putative uncharacterized protein (Fragment) OS=Mus musculus GN=Cnksr2 PE=2 SV=1;tr|A2AI78|A2AI78_MOUSE Connector enhancer of kinase suppressor of ras 2 OS=Mus musculus GN=Cnksr2 PE=1 SV=1;sp|Q80YA9-2|CNKR2_MOUSE Isoform 2 of Connecto	0	0	0	0	0	0	0	0	0	0	1	1	1	2.2	2.2	2.2	56.257	1	-2	0	0	0	0	0	0	1	0	0	1	0	0	1	0
172	A2AI89;A2AI88;A2AI87;P18826-2;P18826;Q8BSV5;Q8CBA7;Q3UV91;A2AI91	A2AI89;A2AI88;A2AI87;P18826-2;P18826;Q8BSV5;Q8CBA7;Q3UV91;A2AI91	Phosphorylase b kinase regulatory subunit alpha, skeletal muscle isoform	Phka1	tr|A2AI89|A2AI89_MOUSE Phosphorylase b kinase regulatory subunit alpha, skeletal muscle isoform OS=Mus musculus GN=Phka1 PE=4 SV=1;tr|A2AI88|A2AI88_MOUSE Phosphorylase b kinase regulatory subunit alpha, skeletal muscle isoform OS=Mus musculus GN=Phka1 PE=4	72945000	103000000	36867000	3224400	1105200	1560600	558590	129440000	135810000	0	7	7	7	8	8	8	135.6	0	6.9547	212810000	10	3	6	1	3	5	1	3	5	1	3	5	1
173	A2AIJ1;Q3UII2;P40237	A2AIJ1;Q3UII2;P40237	Tetraspanin;CD82 antigen	Cd82	tr|A2AIJ1|A2AIJ1_MOUSE CD82 antigen (Fragment) OS=Mus musculus GN=Cd82 PE=4 SV=1;tr|Q3UII2|Q3UII2_MOUSE CD82 antigen OS=Mus musculus GN=Cd82 PE=2 SV=1;sp|P40237|CD82_MOUSE CD82 antigen OS=Mus musculus GN=Cd82 PE=1 SV=1	28928000	28622000	33316000	11358000	3616100	3577800	4164500	27686000	30642000	29200000	1	1	1	6.7	6.7	6.7	19.89	0.00032191	2.7842	90866000	3	1	1	1	1	1	1	1	1	1	1	1	1
174	A2AIL4	A2AIL4	NADH dehydrogenase (ubiquinone) complex I, assembly factor 6	Ndufaf6	sp|A2AIL4|NDUF6_MOUSE NADH dehydrogenase (ubiquinone) complex I, assembly factor 6 OS=Mus musculus GN=Ndufaf6 PE=3 SV=1	308890000	158610000	160680000	33062000	16257000	8347600	8456700	241800000	240040000	302070000	5	5	5	21.6	21.6	21.6	38.362	0	8.9523	628170000	17	6	5	6	5	4	3	5	4	3	5	4	3
175	E9PZY8;A2AIV2;A2AIV2-2;Q8CFK9	E9PZY8;A2AIV2;A2AIV2-2	Protein virilizer homolog	1110037F02Rik;Kiaa1429	tr|E9PZY8|E9PZY8_MOUSE Protein 1110037F02Rik OS=Mus musculus GN=1110037F02Rik PE=1 SV=1;sp|A2AIV2|VIR_MOUSE Protein virilizer homolog OS=Mus musculus GN=Kiaa1429 PE=1 SV=1;sp|A2AIV2-2|VIR_MOUSE Isoform 2 of Protein virilizer homolog OS=Mus musculus GN=Kiaa	496850000	337160000	375860000	11100000	4558200	3093300	3448300	509050000	481810000	427120000	19	19	19	15.3	15.3	15.3	207.17	0	45.745	1209900000	39	11	12	16	13	12	13	13	12	13	13	12	13
176	A2AIX1;E9QAT4;Q80U43;F7BPW6;Q811L5;Q8K000;Q8R336;Q3TRA8;Q3TZR0;F6T8X6	A2AIX1;E9QAT4;Q80U43;F7BPW6;Q811L5		Sec16a	tr|A2AIX1|A2AIX1_MOUSE Protein Sec16a OS=Mus musculus GN=Sec16a PE=1 SV=1;tr|E9QAT4|E9QAT4_MOUSE Protein Sec16a OS=Mus musculus GN=Sec16a PE=1 SV=1;tr|Q80U43|Q80U43_MOUSE MKIAA0310 protein (Fragment) OS=Mus musculus GN=Sec16a PE=2 SV=3;tr|F7BPW6|F7BPW6_MOU	723800000	532650000	737160000	19739000	7166300	5273700	7298600	728180000	816680000	840910000	25	25	25	19.2	19.2	19.2	256.47	0	93.463	1993600000	53	20	14	19	17	14	16	17	14	16	17	14	16
177	Q923C1;A2AJ15;Q8BTW7;Q8R3F8;A2AJ14;Q8BIL8	Q923C1;A2AJ15;Q8BTW7;Q8R3F8	alpha-1,2-Mannosidase;Endoplasmic reticulum mannosyl-oligosaccharide 1,2-alpha-mannosidase	Man1b1	tr|Q923C1|Q923C1_MOUSE Man1b1 protein (Fragment) OS=Mus musculus GN=Man1b1 PE=2 SV=1;sp|A2AJ15|MA1B1_MOUSE Endoplasmic reticulum mannosyl-oligosaccharide 1,2-alpha-mannosidase OS=Mus musculus GN=Man1b1 PE=2 SV=1;tr|Q8BTW7|Q8BTW7_MOUSE Putative uncharacteri	63976000	23445000	130680000	6414900	1881700	689570	3843600	140730000	49761000	97568000	4	4	4	10.4	10.4	10.4	64.794	0	8.3792	218110000	7	2	2	3	2	3	3	2	3	3	2	3	3
178	A2AJ26;P41234;Q6ZPZ4	A2AJ26;P41234;Q6ZPZ4	ATP-binding cassette sub-family A member 2	Abca2	tr|A2AJ26|A2AJ26_MOUSE ATP-binding cassette sub-family A member 2 OS=Mus musculus GN=Abca2 PE=1 SV=1;sp|P41234|ABCA2_MOUSE ATP-binding cassette sub-family A member 2 OS=Mus musculus GN=Abca2 PE=1 SV=4;tr|Q6ZPZ4|Q6ZPZ4_MOUSE MKIAA1062 protein (Fragment) OS=	27904000	91441000	73968000	1757400	253670	831280	672440	78373000	108580000	71652000	7	7	7	3.7	3.7	3.7	270.52	0	16.619	193310000	11	2	5	4	3	6	4	3	6	4	3	6	4
179	A2AJ72;A2AJ71;F6W2V3	A2AJ72		Fubp3	tr|A2AJ72|A2AJ72_MOUSE MCG130458 OS=Mus musculus GN=Fubp3 PE=4 SV=1	5612100000	5778300000	4158200000	398680000	143900000	148160000	106620000	5746100000	5685100000	6211100000	24	24	1	63.1	63.1	3.5	61.447	0	91.192	15549000000	120	40	41	39	21	23	21	21	23	21	1	1	1
180	A2AJG0;Q80UU2;Q8BX36	A2AJG0;Q80UU2;Q8BX36	Ribonuclease P protein subunit p38	Rpp38	tr|A2AJG0|A2AJG0_MOUSE Ribonuclease P protein subunit p38 OS=Mus musculus GN=Rpp38 PE=4 SV=1;sp|Q80UU2|RPP38_MOUSE Ribonuclease P protein subunit p38 OS=Mus musculus GN=Rpp38 PE=2 SV=1;tr|Q8BX36|Q8BX36_MOUSE Putative uncharacterized protein (Fragment) OS=M	229270000	197470000	236590000	39019000	13486000	11616000	13917000	242740000	266530000	303600000	7	7	7	28.9	28.9	28.9	31.189	0	14.094	663330000	21	9	7	5	6	7	5	6	7	5	6	7	5
181	A2AJH3;Q3THR4;O70311;Q8CFK1	A2AJH3;Q3THR4;O70311;Q8CFK1	Glycylpeptide N-tetradecanoyltransferase;Glycylpeptide N-tetradecanoyltransferase 2	Nmt2	tr|A2AJH3|A2AJH3_MOUSE Glycylpeptide N-tetradecanoyltransferase OS=Mus musculus GN=Nmt2 PE=3 SV=1;tr|Q3THR4|Q3THR4_MOUSE Glycylpeptide N-tetradecanoyltransferase OS=Mus musculus GN=Nmt2 PE=2 SV=1;sp|O70311|NMT2_MOUSE Glycylpeptide N-tetradecanoyltransferas	625980000	561110000	706100000	59162000	19562000	17535000	22066000	799220000	656200000	695450000	12	9	9	35.5	26.7	26.7	56.984	0	29.478	1893200000	20	6	6	8	8	10	11	5	7	8	5	7	8
182	A2AJI0;A8Y5P4;A2AJI0-2;A2AJI1;F6WF36	A2AJI0;A8Y5P4;A2AJI0-2;A2AJI1;F6WF36	MAP7 domain-containing protein 1	Map7d1	sp|A2AJI0|MA7D1_MOUSE MAP7 domain-containing protein 1 OS=Mus musculus GN=Map7d1 PE=1 SV=1;tr|A8Y5P4|A8Y5P4_MOUSE MAP7 domain-containing protein 1 OS=Mus musculus GN=Map7d1 PE=1 SV=1;sp|A2AJI0-2|MA7D1_MOUSE Isoform 2 of MAP7 domain-containing protein 1 OS=	1149400000	1282800000	1402300000	83359000	24988000	27886000	30485000	1430000000	1541300000	1584000000	17	17	17	28	28	28	93.275	0	38.672	3834500000	62	24	19	19	14	16	14	14	16	14	14	16	14
183	A2AJK6;A2AJK6-3;B7ZNF8;Q8BYH8-2;Q8BYH8	A2AJK6;A2AJK6-3;B7ZNF8;Q8BYH8-2;Q8BYH8	Chromodomain-helicase-DNA-binding protein 7;Chromodomain-helicase-DNA-binding protein 9	Chd7;Chd9	sp|A2AJK6|CHD7_MOUSE Chromodomain-helicase-DNA-binding protein 7 OS=Mus musculus GN=Chd7 PE=1 SV=1;sp|A2AJK6-3|CHD7_MOUSE Isoform 3 of Chromodomain-helicase-DNA-binding protein 7 OS=Mus musculus GN=Chd7;tr|B7ZNF8|B7ZNF8_MOUSE Chd9 protein OS=Mus musculus G	0	0	63278000	416300	0	0	416300	0	0	70524000	7	3	3	2.6	1.2	1.2	334.06	0.00032782	3.0001	63278000	3	0	0	3	3	3	6	0	0	3	0	0	3
184	Q6LC96;Q3UMU4;A2AJP1;P28700;E9Q9V9;P28705;A2AJP2;Q3V193	Q6LC96;Q3UMU4;A2AJP1;P28700;E9Q9V9;P28705	Retinoic acid receptor RXR-alpha;Retinoic acid receptor RXR-gamma	Rxra;Rxrg	tr|Q6LC96|Q6LC96_MOUSE RXR alpha 2 OS=Mus musculus GN=Rxra PE=2 SV=1;tr|Q3UMU4|Q3UMU4_MOUSE Putative uncharacterized protein OS=Mus musculus GN=Rxra PE=2 SV=1;tr|A2AJP1|A2AJP1_MOUSE Retinoid X receptor alpha OS=Mus musculus GN=Rxra PE=2 SV=1;sp|P28700|RXRA	59821000	31471000	0	3651700	2392800	1258900	0	58949000	40446000	0	5	3	3	11.6	5.9	5.9	48.21	0.0022669	1.9216	91292000	4	2	2	0	4	3	1	2	2	0	2	2	0
185	Q05BF9;A8Y5Q1;A2AJP9;A8Y5Q0;A2AJQ0;Q3UV70	Q05BF9;A8Y5Q1;A2AJP9;A8Y5Q0;A2AJQ0;Q3UV70	[Pyruvate dehydrogenase [acetyl-transferring]]-phosphatase 1, mitochondrial	Pdp1	tr|Q05BF9|Q05BF9_MOUSE Ppm2c protein OS=Mus musculus GN=Pdp1 PE=2 SV=1;tr|A8Y5Q1|A8Y5Q1_MOUSE MCG54027, isoform CRA_b OS=Mus musculus GN=Pdp1 PE=2 SV=1;tr|A2AJP9|A2AJP9_MOUSE MCG54027, isoform CRA_a OS=Mus musculus GN=Pdp1 PE=3 SV=2;tr|A8Y5Q0|A8Y5Q0_MOUSE	110940000	129030000	89423000	9688000	3262900	3795100	2630100	135280000	144580000	133880000	8	8	8	25.3	25.3	25.3	61.181	0	12.815	329390000	16	5	6	5	6	7	5	6	7	5	6	7	5
186	A2AJQ2;A2AJQ3-2;A2AJQ3	A2AJQ2;A2AJQ3-2;A2AJQ3	Probable C-mannosyltransferase DPY19L4	Dpy19l4	tr|A2AJQ2|A2AJQ2_MOUSE Probable C-mannosyltransferase DPY19L4 (Fragment) OS=Mus musculus GN=Dpy19l4 PE=4 SV=1;sp|A2AJQ3-2|D19L4_MOUSE Isoform 2 of Probable C-mannosyltransferase DPY19L4 OS=Mus musculus GN=Dpy19l4;sp|A2AJQ3|D19L4_MOUSE Probable C-mannosyltr	0	11533000	9765700	788830	0	427140	361690	0	15679000	12393000	1	1	1	3.6	3.6	3.6	57.754	0.00033495	3.3037	21298000	2	0	1	1	0	1	1	0	1	1	0	1	1
187	A2AJR8;Q9CZY2	A2AJR8;Q9CZY2	Transcription elongation factor A protein-like 8	Tceal8	tr|A2AJR8|A2AJR8_MOUSE Transcription elongation factor A protein-like 8 (Fragment) OS=Mus musculus GN=Tceal8 PE=4 SV=1;sp|Q9CZY2|TCAL8_MOUSE Transcription elongation factor A protein-like 8 OS=Mus musculus GN=Tceal8 PE=2 SV=1	0	0	28358000	14179000	0	0	14179000	0	0	27492000	1	1	1	30.4	30.4	30.4	4.9681	0.0012323	2.216	28358000	1	0	0	1	0	0	1	0	0	1	0	0	1
188	A2AJT3;Q3TV92;B2RUA1;A2AJT5;A2AJT4	A2AJT3;Q3TV92;B2RUA1;A2AJT5;A2AJT4	Arginine/serine-rich protein PNISR	Pnisr	tr|A2AJT3|A2AJT3_MOUSE Arginine/serine-rich protein PNISR OS=Mus musculus GN=Pnisr PE=4 SV=1;tr|Q3TV92|Q3TV92_MOUSE Putative uncharacterized protein (Fragment) OS=Mus musculus GN=Pnisr PE=2 SV=1;tr|B2RUA1|B2RUA1_MOUSE Splicing factor, arginine/serine-rich	0	8167300	0	907480	0	907480	0	0	8515900	0	1	1	1	3.2	3.2	3.2	42.522	0.00032415	2.8563	8167300	1	0	1	0	0	1	0	0	1	0	0	1	0
189	Q3TM66;A2AK40;Q148S1;O35149	Q3TM66;A2AK40;Q148S1;O35149	Zinc transporter 4	Slc30a4	tr|Q3TM66|Q3TM66_MOUSE Putative uncharacterized protein OS=Mus musculus GN=Slc30a4 PE=2 SV=1;tr|A2AK40|A2AK40_MOUSE Zinc transporter 4 OS=Mus musculus GN=Slc30a4 PE=4 SV=1;tr|Q148S1|Q148S1_MOUSE Solute carrier family 30 (Zinc transporter), member 4 OS=Mus	55637000	0	48922000	8713300	4636400	0	4076800	49475000	0	56045000	3	3	3	13.1	13.1	13.1	42.392	0.00032489	2.8819	104560000	3	1	0	2	2	0	2	2	0	2	2	0	2
190	B1AYU4;A2AK44;A2AK42;B1AYU7;Q6ZPL7;Q8C5N3-2;Q8C5N3;Q3TLI8;Q5FWA5;Q499E2;Q99LG3;J3QNR0;J3QM48;Q8BKP8	B1AYU4;A2AK44;A2AK42;B1AYU7;Q6ZPL7;Q8C5N3-2;Q8C5N3;Q3TLI8;Q5FWA5;Q499E2	Pre-mRNA-splicing factor CWC22 homolog	Cwc22;Gm13695;Gm13697;mKIAA1604	tr|B1AYU4|B1AYU4_MOUSE Pre-mRNA-splicing factor CWC22 homolog OS=Mus musculus GN=Cwc22 PE=1 SV=1;tr|A2AK44|A2AK44_MOUSE Protein Gm13695 OS=Mus musculus GN=Gm13695 PE=4 SV=1;tr|A2AK42|A2AK42_MOUSE Protein Gm13691 OS=Mus musculus GN=Gm13697 PE=4 SV=1;tr|B1AY	411930000	546580000	553510000	36000000	9807800	13014000	13179000	657300000	531210000	565670000	8	8	8	13	13	13	82.752	0	24.286	1512000000	27	9	9	9	6	6	5	6	6	5	6	6	5
191	Q3UVD6;A2AKD7;Q61234	Q3UVD6;A2AKD7;Q61234	Alpha-1-syntrophin	Snta1	tr|Q3UVD6|Q3UVD6_MOUSE Putative uncharacterized protein OS=Mus musculus GN=Snta1 PE=2 SV=1;tr|A2AKD7|A2AKD7_MOUSE Alpha-1-syntrophin OS=Mus musculus GN=Snta1 PE=1 SV=1;sp|Q61234|SNTA1_MOUSE Alpha-1-syntrophin OS=Mus musculus GN=Snta1 PE=1 SV=1	88679000	70460000	71839000	8883800	3410700	2710000	2763000	71638000	97672000	83702000	6	5	5	17.2	15.8	15.8	53.312	0	18.615	230980000	9	3	3	3	5	4	3	4	3	2	4	3	2
192	E9PYJ6;A2AKG8;Q80T90;A2AKG8-3;A2AKG8-2	E9PYJ6;A2AKG8	Focadhesin	Focad	tr|E9PYJ6|E9PYJ6_MOUSE Focadhesin OS=Mus musculus GN=Focad PE=4 SV=1;sp|A2AKG8|FOCAD_MOUSE Focadhesin OS=Mus musculus GN=Focad PE=2 SV=1	949990000	1165600000	1229700000	38898000	11046000	13553000	14299000	1337600000	1499800000	1478100000	21	21	21	15.7	15.7	15.7	189.56	0	43.495	3345200000	60	19	23	18	18	17	14	18	17	14	18	17	14
193	A2AKH4;Q9D3L3;O09044;B0R030;B0R029;E9Q8A1	A2AKH4;Q9D3L3;O09044;B0R030	Synaptosomal-associated protein;Synaptosomal-associated protein 23	Snap23	tr|A2AKH4|A2AKH4_MOUSE Synaptosomal-associated protein OS=Mus musculus GN=Snap23 PE=2 SV=1;tr|Q9D3L3|Q9D3L3_MOUSE Synaptosomal-associated protein OS=Mus musculus GN=Snap23 PE=1 SV=1;sp|O09044|SNP23_MOUSE Synaptosomal-associated protein 23 OS=Mus musculus G	312900000	147550000	309250000	54978000	22350000	10539000	22089000	358410000	276080000	299770000	8	8	8	61.4	61.4	61.4	23.261	0	23.332	769700000	17	5	6	6	7	6	7	7	6	7	7	6	7
194	A2AKH7;Q8JZX5;Q9CSK4;Q9D1G5;Q9CTX7	A2AKH7;Q8JZX5;Q9CSK4;Q9D1G5;Q9CTX7	Leucine-rich repeat-containing protein 57	Lrrc57	tr|A2AKH7|A2AKH7_MOUSE Leucine-rich repeat-containing protein 57 (Fragment) OS=Mus musculus GN=Lrrc57 PE=4 SV=2;tr|Q8JZX5|Q8JZX5_MOUSE Leucine rich repeat containing 57 OS=Mus musculus GN=Lrrc57 PE=2 SV=1;tr|Q9CSK4|Q9CSK4_MOUSE Putative uncharacterized pro	29573000	0	52408000	5465400	1971500	0	3493900	0	0	51756000	2	2	2	11	11	11	24.132	0.00078003	2.3849	81981000	3	1	1	1	1	1	1	1	1	1	1	1	1
195	A2AKU9;A2AKV2;A2AKV3;A2AKV1;A2AKV0	A2AKU9;A2AKV2;A2AKV3;A2AKV1	ATP synthase subunit gamma	Atp5c1	tr|A2AKU9|A2AKU9_MOUSE ATP synthase subunit gamma OS=Mus musculus GN=Atp5c1 PE=1 SV=1;tr|A2AKV2|A2AKV2_MOUSE ATP synthase subunit gamma, mitochondrial (Fragment) OS=Mus musculus GN=Atp5c1 PE=1 SV=1;tr|A2AKV3|A2AKV3_MOUSE ATP synthase subunit gamma, mitocho	7250600	12522000	11831000	1975200	453160	782640	739420	10723000	20038000	15894000	14	1	1	49.2	4	4	32.77	0.00031985	2.6912	31604000	6	2	2	2	11	11	13	1	1	1	1	1	1
196	A2AKV7;A2AKV6;Q8K1E6	A2AKV7;A2AKV6;Q8K1E6	Alpha-ketoglutarate-dependent dioxygenase alkB homolog 3	Alkbh3	tr|A2AKV7|A2AKV7_MOUSE Alpha-ketoglutarate-dependent dioxygenase alkB homolog 3 (Fragment) OS=Mus musculus GN=Alkbh3 PE=4 SV=2;tr|A2AKV6|A2AKV6_MOUSE Alpha-ketoglutarate-dependent dioxygenase alkB homolog 3 OS=Mus musculus GN=Alkbh3 PE=4 SV=1;sp|Q8K1E6|ALK	45920000	19227000	55906000	8646700	3280000	1373400	3993300	80606000	31468000	41560000	2	2	2	12.9	12.9	12.9	23.5	0.00047702	2.6194	121050000	5	2	1	2	1	1	2	1	1	2	1	1	2
197	A2AKX3;A2AKX3-2;F6R186	A2AKX3;A2AKX3-2	Probable helicase senataxin	Setx	sp|A2AKX3|SETX_MOUSE Probable helicase senataxin OS=Mus musculus GN=Setx PE=1 SV=1;sp|A2AKX3-2|SETX_MOUSE Isoform 2 of Probable helicase senataxin OS=Mus musculus GN=Setx	31201000	28004000	14533000	472680	200010	179520	93159	32512000	0	0	6	6	6	3.7	3.7	3.7	297.59	0.00017191	3.8585	73738000	5	1	3	1	2	3	1	2	3	1	2	3	1
198	Q6P6I7;A2AL12;Q5FB19;Q3UZG3;Q8BG05	Q6P6I7;A2AL12;Q5FB19;Q3UZG3;Q8BG05	Heterogeneous nuclear ribonucleoprotein A3	Hnrnpa3	tr|Q6P6I7|Q6P6I7_MOUSE Hnrpa3 protein OS=Mus musculus GN=Hnrnpa3 PE=2 SV=1;tr|A2AL12|A2AL12_MOUSE Heterogeneous nuclear ribonucleoprotein A3 OS=Mus musculus GN=Hnrnpa3 PE=4 SV=1;tr|Q5FB19|Q5FB19_MOUSE Heterogeneous nuclear ribonucleoprotein A3 OS=Mus muscu	53458000000	56110000000	58322000000	9875900000	3144600000	3300600000	3430700000	59111000000	59810000000	59985000000	26	26	5	64.2	64.2	10.1	34.376	0	300.71	167890000000	700	226	238	236	26	23	25	26	23	25	5	5	5
199	F6QP53;R4GML6;B2RXX1;A2AL36-2;A2AL36	F6QP53;R4GML6;B2RXX1;A2AL36-2;A2AL36	Centriolin	Cntrl	tr|F6QP53|F6QP53_MOUSE Centriolin (Fragment) OS=Mus musculus GN=Cntrl PE=4 SV=1;tr|R4GML6|R4GML6_MOUSE Centriolin (Fragment) OS=Mus musculus GN=Cntrl PE=4 SV=1;tr|B2RXX1|B2RXX1_MOUSE Cep110 protein OS=Mus musculus GN=Cntrl PE=2 SV=1;sp|A2AL36-2|CNTRL_MOUSE	0	0	0	0	0	0	0	0	0	0	1	1	1	1.6	1.6	1.6	73.165	1	-2	0	0	0	0	0	0	1	0	0	1	0	0	1	0
200	A2AL50;Q8C0I1;H3BKN2;A2AL49;Q8BKC4;Q3TNW8;H3BIY5;H3BJ14;D3Z623	A2AL50;Q8C0I1;H3BKN2;A2AL49;Q8BKC4	Alkyldihydroxyacetonephosphate synthase, peroxisomal	Agps	tr|A2AL50|A2AL50_MOUSE Alkyldihydroxyacetonephosphate synthase, peroxisomal OS=Mus musculus GN=Agps PE=1 SV=1;sp|Q8C0I1|ADAS_MOUSE Alkyldihydroxyacetonephosphate synthase, peroxisomal OS=Mus musculus GN=Agps PE=1 SV=1;tr|H3BKN2|H3BKN2_MOUSE Alkyldihydroxya	2069600000	2437400000	3095500000	185430000	50479000	59449000	75500000	2864400000	2929500000	3227900000	21	21	21	44.6	44.6	44.6	74.342	0	96.155	7602500000	82	25	26	31	17	16	19	17	16	19	17	16	19
201	Q9EQ66;A2AL85;Q8BSY0;Q8CBM2;Q8BQK0;A2AL83;A2AL79;Q6P8S1;Q8CH79;A2AL78;Q9EQ67;Q91WG6;Q3TU40;Q9EQ65;A2AL81;A2AL71;Q9EQ63;Q9EQ62;A2AL77;Q9CR06;Q9D7J8;Q920F7;A2AL74;Q920F8;A2AL76;Q920F9;A2AL75;Q9EQ64	Q9EQ66;A2AL85;Q8BSY0;Q8CBM2;Q8BQK0	Aspartyl/asparaginyl beta-hydroxylase	ASPH;Asph	tr|Q9EQ66|Q9EQ66_MOUSE Aspartly beta-hydroxylase OS=Mus musculus GN=ASPH PE=4 SV=1;tr|A2AL85|A2AL85_MOUSE Aspartyl/asparaginyl beta-hydroxylase OS=Mus musculus GN=Asph PE=4 SV=1;sp|Q8BSY0|ASPH_MOUSE Aspartyl/asparaginyl beta-hydroxylase OS=Mus musculus GN=	687200000	846200000	926630000	70287000	19634000	24177000	26475000	877250000	915580000	872480000	16	16	16	29.9	29.9	29.9	77.319	0	46.481	2460000000	44	11	16	17	8	14	14	8	14	14	8	14	14
202	A2ALA4;Q62276-2;Q62276	A2ALA4;Q62276-2;Q62276	Mediator of RNA polymerase II transcription subunit 22	Med22	tr|A2ALA4|A2ALA4_MOUSE Mediator of RNA polymerase II transcription subunit 22 (Fragment) OS=Mus musculus GN=Med22 PE=4 SV=1;sp|Q62276-2|MED22_MOUSE Isoform 2 of Mediator of RNA polymerase II transcription subunit 22 OS=Mus musculus GN=Med22;sp|Q62276|MED22	29271000	14710000	0	3998200	2661000	1337200	0	26433000	39759000	0	2	2	2	17.3	17.3	17.3	19.562	0.0062728	1.3746	43980000	2	2	0	0	2	1	0	2	1	0	2	1	0
203	I6L9E0;Q3U3J6;A2ALA6;P09925;V9GXE6	I6L9E0;Q3U3J6;A2ALA6;P09925;V9GXE6	Surfeit locus protein 1	Surf1	tr|I6L9E0|I6L9E0_MOUSE Surf1 protein OS=Mus musculus GN=Surf1 PE=2 SV=1;tr|Q3U3J6|Q3U3J6_MOUSE Putative uncharacterized protein OS=Mus musculus GN=Surf1 PE=2 SV=1;tr|A2ALA6|A2ALA6_MOUSE Surfeit gene 1, isoform CRA_a OS=Mus musculus GN=Surf1 PE=4 SV=1;sp|P0	437570000	220900000	312750000	64748000	29171000	14727000	20850000	381160000	417220000	463170000	8	8	8	44.9	44.9	44.9	29.966	0	19.879	971220000	17	7	5	5	5	3	6	5	3	6	5	3	6
204	A2ALB2;Q6PAQ4;A2ALB1	A2ALB2;Q6PAQ4;A2ALB1	RNA exonuclease 4	Rexo4	tr|A2ALB2|A2ALB2_MOUSE RNA exonuclease 4 OS=Mus musculus GN=Rexo4 PE=4 SV=1;sp|Q6PAQ4|REXO4_MOUSE RNA exonuclease 4 OS=Mus musculus GN=Rexo4 PE=2 SV=2;tr|A2ALB1|A2ALB1_MOUSE RNA exonuclease 4 (Fragment) OS=Mus musculus GN=Rexo4 PE=4 SV=1	292830000	454780000	489380000	49479000	11713000	18191000	19575000	490740000	554150000	578140000	11	11	11	33.5	33.5	33.5	45.465	0	21.025	1237000000	32	10	11	11	8	9	10	8	9	10	8	9	10
205	A2ALF2;Q6NZB0;A2ALF0;A2ALF3;F6TQL3;F6QIL6;D3Z4I5;F7CXJ2;E9PZT4	A2ALF2;Q6NZB0;A2ALF0;A2ALF3;F6TQL3	DnaJ homolog subfamily C member 8	Dnajc8	tr|A2ALF2|A2ALF2_MOUSE DnaJ (Hsp40) homolog, subfamily C, member 8 OS=Mus musculus GN=Dnajc8 PE=2 SV=1;sp|Q6NZB0|DNJC8_MOUSE DnaJ homolog subfamily C member 8 OS=Mus musculus GN=Dnajc8 PE=2 SV=2;tr|A2ALF0|A2ALF0_MOUSE DnaJ homolog subfamily C member 8 OS=M	2751500000	2200600000	3404500000	596900000	196530000	157190000	243180000	2652200000	2816500000	3364000000	11	11	11	54.9	54.9	54.9	29.812	0	102.3	8356600000	52	18	17	17	10	9	11	10	9	11	10	9	11
206	Q8C048;A2ALL9;Q0VF55;Q0VF54	Q8C048;A2ALL9;Q0VF55;Q0VF54	Calcium-transporting ATPase	Atp2b3	tr|Q8C048|Q8C048_MOUSE Calcium-transporting ATPase OS=Mus musculus GN=Atp2b3 PE=2 SV=1;tr|A2ALL9|A2ALL9_MOUSE Calcium-transporting ATPase OS=Mus musculus GN=Atp2b3 PE=1 SV=1;tr|Q0VF55|Q0VF55_MOUSE Calcium-transporting ATPase OS=Mus musculus GN=Atp2b3 PE=2	116090000	83129000	125250000	5794100	2073000	1484400	2236600	131940000	89366000	0	8	1	1	8.2	0.7	0.7	125.71	1	-2	324470000	2	1	1	0	7	8	8	1	1	1	1	1	1
207	E9Q151;A2ALM6;Q8VBW1-3;Q8VBW1-2;Q8VBW1;F6UKB4;E9Q6T2;A0A023JDV8;B2LHN0	E9Q151;A2ALM6;Q8VBW1-3;Q8VBW1-2;Q8VBW1;F6UKB4	Transporter;Sodium- and chloride-dependent creatine transporter 1	Slc6a8	tr|E9Q151|E9Q151_MOUSE Transporter OS=Mus musculus GN=Slc6a8 PE=3 SV=1;tr|A2ALM6|A2ALM6_MOUSE Transporter OS=Mus musculus GN=Slc6a8 PE=2 SV=1;sp|Q8VBW1-3|SC6A8_MOUSE Isoform 3 of Sodium- and chloride-dependent creatine transporter 1 OS=Mus musculus GN=Slc6	98415000	74551000	178490000	15975000	4473400	3388700	8113300	140240000	126850000	190940000	5	4	4	9.2	8.1	8.1	69.96	0	5.1181	351460000	9	2	3	4	4	4	3	3	3	2	3	3	2
208	A2ALR9;Q3V0C5;Q3V0C5-5;Q3V0C5-2;A2ALR8;Q3V0C5-4;Q3V0C5-3;A2ALR5;B7ZNK5;F6VSP0;F6TH61;F7ALR2;F6TGT8;F6VSQ9;A2ALS8;A2ALS9;A2BDP2	A2ALR9;Q3V0C5;Q3V0C5-5;Q3V0C5-2;A2ALR8	Ubiquitin carboxyl-terminal hydrolase 48	Usp48	tr|A2ALR9|A2ALR9_MOUSE Ubiquitin carboxyl-terminal hydrolase 48 OS=Mus musculus GN=Usp48 PE=4 SV=1;sp|Q3V0C5|UBP48_MOUSE Ubiquitin carboxyl-terminal hydrolase 48 OS=Mus musculus GN=Usp48 PE=2 SV=2;sp|Q3V0C5-5|UBP48_MOUSE Isoform 5 of Ubiquitin carboxyl-ter	973550000	1730400000	1857700000	74782000	15960000	28368000	30455000	1814800000	1982200000	2057300000	16	16	16	20.3	20.3	20.3	118.77	0	22.27	4561700000	42	13	13	16	11	15	11	11	15	11	11	15	11
209	A2ALS7;A2ALS4;A2ALS5;A2ALS5-4;A2ALS5-3;A2ALS5-2	A2ALS7;A2ALS4;A2ALS5;A2ALS5-4;A2ALS5-3;A2ALS5-2	Rap1 GTPase-activating protein 1	Rap1gap	tr|A2ALS7|A2ALS7_MOUSE Rap1 GTPase-activating protein 1 (Fragment) OS=Mus musculus GN=Rap1gap PE=4 SV=1;tr|A2ALS4|A2ALS4_MOUSE Rap1 GTPase-activating protein 1 OS=Mus musculus GN=Rap1gap PE=4 SV=1;sp|A2ALS5|RPGP1_MOUSE Rap1 GTPase-activating protein 1 OS=M	0	0	39470000	1879500	0	0	1879500	0	0	45815000	3	3	3	13.3	13.3	13.3	43.394	0.0047128	1.4975	39470000	4	1	0	3	1	0	3	1	0	3	1	0	3
210	A7TU71;A2ALU4;A2ALU4-2;Q8C7N5	A7TU71;A2ALU4;A2ALU4-2	Protein Shroom2	Shroom2	tr|A7TU71|A7TU71_MOUSE Protein Shroom2 OS=Mus musculus GN=Shroom2 PE=1 SV=1;sp|A2ALU4|SHRM2_MOUSE Protein Shroom2 OS=Mus musculus GN=Shroom2 PE=1 SV=1;sp|A2ALU4-2|SHRM2_MOUSE Isoform 2 of Protein Shroom2 OS=Mus musculus GN=Shroom2	681180000	683310000	578380000	19429000	6811800	6833100	5783800	745340000	832690000	722170000	15	15	14	14.7	14.7	14.1	165.26	0	38.873	1942900000	36	13	13	10	11	12	8	11	12	8	10	11	7
211	A2ALV5	A2ALV5		AI481877	tr|A2ALV5|A2ALV5_MOUSE Protein AI481877 OS=Mus musculus GN=AI481877 PE=4 SV=1	0	0	66157000	719100	0	0	719100	0	0	64136000	1	1	1	0.9	0.9	0.9	168.06	1	-2	66157000	1	0	0	1	0	0	1	0	0	1	0	0	1
212	A2ALW5;A2ALW5-2;Z4YLX5;F2Z410;F2Z3Z8	A2ALW5;A2ALW5-2;Z4YLX5	DnaJ homolog subfamily C member 25	Dnajc25	sp|A2ALW5|DJC25_MOUSE DnaJ homolog subfamily C member 25 OS=Mus musculus GN=Dnajc25 PE=2 SV=1;sp|A2ALW5-2|DJC25_MOUSE Isoform 2 of DnaJ homolog subfamily C member 25 OS=Mus musculus GN=Dnajc25;tr|Z4YLX5|Z4YLX5_MOUSE DnaJ homolog subfamily C member 25 (Frag	111320000	50938000	79154000	12071000	5566100	2546900	3957700	101040000	130330000	77285000	4	4	3	12	12	9.2	41.937	0.0016791	2.0976	241410000	9	4	3	2	4	2	3	4	2	3	3	2	2
213	A2AM29;Q3ULL0	A2AM29;Q3ULL0	Protein AF-9	Mllt3	sp|A2AM29|AF9_MOUSE Protein AF-9 OS=Mus musculus GN=Mllt3 PE=1 SV=1;tr|Q3ULL0|Q3ULL0_MOUSE Putative uncharacterized protein OS=Mus musculus GN=Mllt3 PE=2 SV=1	96138000	34536000	116220000	10735000	4179900	1501600	5053200	74864000	93132000	87484000	3	3	3	8.1	8.1	8.1	63.375	0	9.5748	246900000	7	2	2	3	2	2	3	2	2	3	2	2	3
214	A2AMH5;A2AMH4;Q6X893;Q6X893-2;A2AMH3;A2AMH8	A2AMH5;A2AMH4;Q6X893;Q6X893-2;A2AMH3	Choline transporter-like protein 1	Slc44a1	tr|A2AMH5|A2AMH5_MOUSE Choline transporter-like protein 1 OS=Mus musculus GN=Slc44a1 PE=4 SV=1;tr|A2AMH4|A2AMH4_MOUSE Choline transporter-like protein 1 OS=Mus musculus GN=Slc44a1 PE=4 SV=1;sp|Q6X893|CTL1_MOUSE Choline transporter-like protein 1 OS=Mus mus	310370000	172080000	198320000	21274000	9699000	5377400	6197500	243330000	244080000	248450000	8	8	8	16.8	16.8	16.8	73.044	0	44.959	680760000	21	7	8	6	7	6	5	7	6	5	7	6	5
215	A2AMI2;Q80XI3;Q80XI3-3;Q6DI78;A2AMI6;A2AMI4;Q8BQR8	A2AMI2;Q80XI3;Q80XI3-3;Q6DI78	Eukaryotic translation initiation factor 4 gamma 3	Eif4g3	tr|A2AMI2|A2AMI2_MOUSE Eukaryotic translation initiation factor 4 gamma 3 OS=Mus musculus GN=Eif4g3 PE=1 SV=1;sp|Q80XI3|IF4G3_MOUSE Eukaryotic translation initiation factor 4 gamma 3 OS=Mus musculus GN=Eif4g3 PE=1 SV=2;sp|Q80XI3-3|IF4G3_MOUSE Isoform 3 of	15000000	0	0	144230	144230	0	0	26061000	0	0	35	1	1	31.2	1.5	1.5	174.82	1	-2	15000000	1	1	0	0	26	30	28	1	0	0	1	0	0
216	A2AMM0	A2AMM0	Muscle-related coiled-coil protein	Murc	sp|A2AMM0|MURC_MOUSE Muscle-related coiled-coil protein OS=Mus musculus GN=Murc PE=2 SV=1	234050000	252050000	232020000	44882000	14628000	15753000	14501000	239010000	240820000	302030000	3	3	3	12.4	12.4	12.4	41.008	0	9.8737	718120000	14	5	5	4	3	3	3	3	3	3	3	3	3
217	A2AMU9;Q9D0I8;A2AMV1;Q9QYY3;D6RCI7	A2AMU9;Q9D0I8;A2AMV1;Q9QYY3	mRNA turnover protein 4 homolog	Mrto4;mg684	tr|A2AMU9|A2AMU9_MOUSE Mrto4 protein OS=Mus musculus GN=Mrto4 PE=2 SV=1;sp|Q9D0I8|MRT4_MOUSE mRNA turnover protein 4 homolog OS=Mus musculus GN=Mrto4 PE=2 SV=1;tr|A2AMV1|A2AMV1_MOUSE RIKEN cDNA 2610012O22, isoform CRA_a OS=Mus musculus GN=Mrto4 PE=3 SV=1;t	2728000000	3034600000	3841400000	564940000	160470000	178510000	225970000	3621600000	4068500000	3761500000	14	14	14	49	49	49	27.545	0	37.066	9604000000	70	22	22	26	10	9	13	10	9	13	10	9	13
218	A2AMY5;Q91VX2;F6PYV5;A2AMY7;F6WTC8	A2AMY5;Q91VX2	Ubiquitin-associated protein 2	Ubap2	tr|A2AMY5|A2AMY5_MOUSE Ubiquitin-associated protein 2 OS=Mus musculus GN=Ubap2 PE=1 SV=1;sp|Q91VX2|UBAP2_MOUSE Ubiquitin-associated protein 2 OS=Mus musculus GN=Ubap2 PE=1 SV=1	1279100000	1601800000	2061000000	149750000	38761000	48540000	62454000	1708600000	1865900000	2091400000	21	21	21	35.1	35.1	35.1	117.83	0	80.852	4941900000	63	17	22	24	16	17	18	16	17	18	16	17	18
219	A2AMZ4	A2AMZ4	Uncharacterized protein C17orf89 homolog		sp|A2AMZ4|CQ089_MOUSE Uncharacterized protein C17orf89 homolog OS=Mus musculus PE=4 SV=1	45297000	27264000	21359000	15653000	7549400	4544100	3559900	33640000	44975000	42780000	2	2	2	39.2	39.2	39.2	7.7849	0	6.0322	93920000	6	3	1	2	2	1	2	2	1	2	2	1	2
220	A2AN08-3;A2AN08;A2AN08-5;A2AN08-2;Z4YMA7;F6SSP6;A2VCS3;A2AN08-4;Z4YLP1	A2AN08-3;A2AN08;A2AN08-5;A2AN08-2	E3 ubiquitin-protein ligase UBR4	Ubr4	sp|A2AN08-3|UBR4_MOUSE Isoform 3 of E3 ubiquitin-protein ligase UBR4 OS=Mus musculus GN=Ubr4;sp|A2AN08|UBR4_MOUSE E3 ubiquitin-protein ligase UBR4 OS=Mus musculus GN=Ubr4 PE=1 SV=1;sp|A2AN08-5|UBR4_MOUSE Isoform 5 of E3 ubiquitin-protein ligase UBR4 OS=Mus	7937800000	8183200000	9500800000	97052000	30067000	30997000	35988000	9652200000	10093000000	10069000000	121	121	121	34.1	34.1	34.1	570.29	0	323.31	25622000000	451	141	151	159	98	97	104	98	97	104	98	97	104
221	A2AN37;P52623;F7CBX2;Q3V218	A2AN37;P52623;F7CBX2	Uridine-cytidine kinase;Uridine-cytidine kinase 1	Uck1	tr|A2AN37|A2AN37_MOUSE Uridine-cytidine kinase OS=Mus musculus GN=Uck1 PE=3 SV=1;sp|P52623|UCK1_MOUSE Uridine-cytidine kinase 1 OS=Mus musculus GN=Uck1 PE=2 SV=2;tr|F7CBX2|F7CBX2_MOUSE Uridine-cytidine kinase 1 (Fragment) OS=Mus musculus GN=Uck1 PE=4 SV=1	214600000	133470000	111970000	24212000	11295000	7024600	5893000	210110000	147340000	197080000	6	6	5	27.2	27.2	24.4	31.669	0	13.716	460030000	15	5	6	4	5	4	2	5	4	2	4	3	2
222	A2AN61;Q8VEH2;Q70KX6;Q3UUV0;Q3TXU6;Q3TMV1;Q6GQU3;Q8BIT2;Q9CUW6;F7AT58;F7D5G9;F6S5B6;F6XWQ4	A2AN61;Q8VEH2;Q70KX6;Q3UUV0;Q3TXU6;Q3TMV1;Q6GQU3;Q8BIT2		Ciz1	tr|A2AN61|A2AN61_MOUSE CDKN1A interacting zinc finger protein 1, isoform CRA_d OS=Mus musculus GN=Ciz1 PE=4 SV=1;tr|Q8VEH2|Q8VEH2_MOUSE CDKN1A interacting zinc finger protein 1 OS=Mus musculus GN=Ciz1 PE=2 SV=1;tr|Q70KX6|Q70KX6_MOUSE Cip1-interacting zinc-	140250000	135540000	56605000	9776500	4125100	3986600	1664900	157190000	188750000	68839000	8	8	8	16.4	16.4	16.4	91.1	0	19.496	332400000	14	6	4	4	6	4	3	6	4	3	6	4	3
223	Q80YU9;A2AN96;O88851	Q80YU9;A2AN96;O88851	Putative hydrolase RBBP9	Rbbp9	tr|Q80YU9|Q80YU9_MOUSE Retinoblastoma binding protein 9 OS=Mus musculus GN=Rbbp9 PE=2 SV=1;tr|A2AN96|A2AN96_MOUSE Retinoblastoma binding protein 9 OS=Mus musculus GN=Rbbp9 PE=2 SV=1;sp|O88851|RBBP9_MOUSE Putative hydrolase RBBP9 OS=Mus musculus GN=Rbbp9 PE	473450000	414630000	608140000	124680000	39454000	34552000	50678000	467430000	660730000	607130000	5	5	5	47.3	47.3	47.3	20.912	0	25.883	1496200000	13	4	3	6	4	3	5	4	3	5	4	3	5
224	J3QMC5;A2ANY6;Q3TPE2;Q5U481;Q6R5G2;Q8CAR9;Q497I1;Q6IQZ8	J3QMC5;A2ANY6		Mdn1	tr|J3QMC5|J3QMC5_MOUSE Midasin OS=Mus musculus GN=Mdn1 PE=1 SV=1;tr|A2ANY6|A2ANY6_MOUSE Midasin OS=Mus musculus GN=Mdn1 PE=1 SV=1	947660000	766810000	731110000	7739200	2998900	2426600	2313600	970560000	1042800000	886660000	39	39	39	10.6	10.6	10.6	629.58	0	60.456	2445600000	62	18	20	24	22	22	27	22	22	27	22	22	27
225	Q8K3B2;A2ANZ2;Q3U3D8;Q3TJP2;Q6DFW0	Q8K3B2;A2ANZ2;Q3U3D8;Q3TJP2;Q6DFW0	Protein C9orf72 homolog	3110043O21Rik	tr|Q8K3B2|Q8K3B2_MOUSE Uncharacterized protein OS=Mus musculus GN=3110043O21Rik PE=2 SV=1;tr|A2ANZ2|A2ANZ2_MOUSE MCG141727, isoform CRA_b OS=Mus musculus GN=3110043O21Rik PE=4 SV=1;tr|Q3U3D8|Q3U3D8_MOUSE MCG141727, isoform CRA_a OS=Mus musculus GN=3110043O	13188000	0	0	775790	775790	0	0	14094000	0	0	1	1	1	3.8	3.8	3.8	35.86	0.0069747	1.3223	13188000	2	1	1	0	1	1	0	1	1	0	1	1	0
226	A2AP32;A2AP31;Q3UIU2	A2AP32;A2AP31;Q3UIU2	NADH dehydrogenase [ubiquinone] 1 beta subcomplex subunit 6	Ndufb6	tr|A2AP32|A2AP32_MOUSE NADH dehydrogenase [ubiquinone] 1 beta subcomplex subunit 6 OS=Mus musculus GN=Ndufb6 PE=1 SV=1;tr|A2AP31|A2AP31_MOUSE MCG9810 OS=Mus musculus GN=Ndufb6 PE=2 SV=1;sp|Q3UIU2|NDUB6_MOUSE NADH dehydrogenase [ubiquinone] 1 beta subcomple	78621000	128710000	70368000	30855000	8735600	14301000	7818600	138950000	134350000	87899000	3	3	3	34	34	34	11.741	0	6.467	277700000	8	3	3	2	2	3	3	2	3	3	2	3	3
227	I7HJQ8;A2AP74;Q8BIF0-2;Q8BIF0	I7HJQ8;A2AP74;Q8BIF0-2;Q8BIF0	CD99 antigen-like protein 2	Cd99l2	tr|I7HJQ8|I7HJQ8_MOUSE CD99 antigen-like protein 2 OS=Mus musculus GN=Cd99l2 PE=4 SV=1;tr|A2AP74|A2AP74_MOUSE CD99 antigen-like protein 2 OS=Mus musculus GN=Cd99l2 PE=4 SV=1;sp|Q8BIF0-2|C99L2_MOUSE Isoform 2 of CD99 antigen-like protein 2 OS=Mus musculus G	117370000	101640000	71674000	29069000	11737000	10164000	7167400	92011000	125520000	116170000	2	2	2	17.9	17.9	17.9	20.092	0	9.6439	290690000	6	2	2	2	2	2	1	2	2	1	2	2	1
228	A2AP78;Q544R9;G5E920;O54879	A2AP78;Q544R9;G5E920;O54879	High mobility group protein B3	Hmgb3	tr|A2AP78|A2AP78_MOUSE High mobility group protein B3 (Fragment) OS=Mus musculus GN=Hmgb3 PE=4 SV=1;tr|Q544R9|Q544R9_MOUSE High mobility group box 3 OS=Mus musculus GN=Hmgb3 PE=2 SV=1;tr|G5E920|G5E920_MOUSE MCG114640 OS=Mus musculus GN=Gm6104 PE=4 SV=1;sp|	2123800000	2463500000	2671300000	806510000	235980000	273730000	296810000	2559000000	2840900000	3046100000	6	6	6	30.8	30.8	30.8	18.311	0	15.864	7258600000	23	7	8	8	6	6	5	6	6	5	6	6	5
229	A2APB8;Q9CT36;Q8BTJ3	A2APB8;Q9CT36;Q8BTJ3	Targeting protein for Xklp2	Tpx2	sp|A2APB8|TPX2_MOUSE Targeting protein for Xklp2 OS=Mus musculus GN=Tpx2 PE=1 SV=1;tr|Q9CT36|Q9CT36_MOUSE Putative uncharacterized protein (Fragment) OS=Mus musculus GN=Tpx2 PE=2 SV=1;tr|Q8BTJ3|Q8BTJ3_MOUSE Putative uncharacterized protein OS=Mus musculus	3911200000	3433000000	3791200000	247450000	86916000	76288000	84248000	4257600000	4678500000	4747200000	39	39	39	53.4	53.4	53.4	85.893	0	99.739	11135000000	147	51	43	53	34	31	33	34	31	33	34	31	33
230	A2API3;Q80V86	A2API3;Q80V86	Integrator complex subunit 8	Ints8	tr|A2API3|A2API3_MOUSE Integrator complex subunit 8 OS=Mus musculus GN=Ints8 PE=4 SV=1;sp|Q80V86|INT8_MOUSE Integrator complex subunit 8 OS=Mus musculus GN=Ints8 PE=2 SV=1	360020000	271470000	395830000	19756000	6923500	5220500	7612100	438970000	402060000	445120000	15	15	15	19.6	19.6	19.6	111.38	0	45.243	1027300000	31	12	9	10	11	8	8	11	8	8	11	8	8
231	A2API8;O54931-2;Q69ZV5;O54931-5;O54931;O54931-4;Q8C9L6;Q99L95;O54931-3;A2APJ1;A2API9	A2API8;O54931-2;Q69ZV5;O54931-5;O54931;O54931-4;Q8C9L6;Q99L95;O54931-3	A-kinase anchor protein 2	Akap2;mKIAA0920	tr|A2API8|A2API8_MOUSE A-kinase anchor protein 2 OS=Mus musculus GN=Akap2 PE=4 SV=1;sp|O54931-2|AKAP2_MOUSE Isoform 2 of A-kinase anchor protein 2 OS=Mus musculus GN=Akap2;tr|Q69ZV5|Q69ZV5_MOUSE MKIAA0920 protein (Fragment) OS=Mus musculus GN=mKIAA0920 PE=	0	0	43586000	968580	0	0	968580	0	0	42254000	30	1	1	38.9	1.2	1.2	101.6	0.00063072	2.514	43586000	1	0	0	1	25	24	26	0	0	1	0	0	1
232	Q3UNN2;Q3U8S1;Q3U468;A2APM5;A2APM3;A2APM4;E9QKM8;Q80X37;A2APM1;A2APM2;P15379-2;P15379-3;P15379-6;P15379-11;P15379-5;P15379-10;P15379-9;P15379-4;P15379-8;P15379-7;P15379;Q3TLT9;P15379-12;P15379-13	Q3UNN2;Q3U8S1;Q3U468;A2APM5;A2APM3;A2APM4;E9QKM8;Q80X37;A2APM1;A2APM2;P15379-2;P15379-3;P15379-6;P15379-11;P15379-5;P15379-10;P15379-9;P15379-4;P15379-8;P15379-7;P15379;Q3TLT9	CD44 antigen	Cd44	tr|Q3UNN2|Q3UNN2_MOUSE Putative uncharacterized protein OS=Mus musculus GN=Cd44 PE=2 SV=1;tr|Q3U8S1|Q3U8S1_MOUSE CD44 antigen OS=Mus musculus GN=Cd44 PE=1 SV=1;tr|Q3U468|Q3U468_MOUSE Putative uncharacterized protein OS=Mus musculus GN=Cd44 PE=2 SV=1;tr|A2A	6035400000	5613100000	6242300000	1192700000	402360000	374200000	416150000	7197200000	7295600000	7592900000	9	9	9	27.4	27.4	27.4	40.247	0	65.111	17891000000	82	28	25	29	8	9	9	8	9	9	8	9	9
233	Q8K1K8;A2APR8;O08901;Q9CS10;Q8C4D0	Q8K1K8;A2APR8;O08901	Mitotic checkpoint serine/threonine-protein kinase BUB1	Bub1	tr|Q8K1K8|Q8K1K8_MOUSE Budding uninhibited by benzimidazoles 1 homolog (S. cerevisiae) OS=Mus musculus GN=Bub1 PE=2 SV=1;tr|A2APR8|A2APR8_MOUSE Mitotic checkpoint serine/threonine-protein kinase BUB1 OS=Mus musculus GN=Bub1 PE=4 SV=1;sp|O08901|BUB1_MOUSE M	1864300000	181650000	184530000	39132000	32708000	3186800	3237400	774220000	900770000	850820000	8	8	8	12.8	12.8	12.8	119.7	0	17.438	2230500000	17	6	6	5	6	6	5	6	6	5	6	6	5
234	F8VPR2;A2APV2;E9PXE6;A2APV2-2;A2APV2-3;F6XR20;A2AQW2;Q6P247;Q8BI52;A2AQW3	F8VPR2;A2APV2;E9PXE6;A2APV2-2;A2APV2-3;F6XR20	Formin-like protein 2	Fmnl2	tr|F8VPR2|F8VPR2_MOUSE Formin-like protein 2 OS=Mus musculus GN=Fmnl2 PE=4 SV=1;sp|A2APV2|FMNL2_MOUSE Formin-like protein 2 OS=Mus musculus GN=Fmnl2 PE=2 SV=2;tr|E9PXE6|E9PXE6_MOUSE Formin-like protein 2 OS=Mus musculus GN=Fmnl2 PE=4 SV=2;sp|A2APV2-2|FMNL2	966100000	770840000	973320000	39857000	14207000	11336000	14314000	1051700000	1028600000	1181000000	21	21	15	19	19	13.7	122.91	0	18.345	2710300000	42	14	13	15	15	13	13	15	13	13	11	7	8
235	A2APX3;Q3U5K7;Q9EPX9;P21460	A2APX3;Q3U5K7;Q9EPX9;P21460	Cystatin-C	Cst3	tr|A2APX3|A2APX3_MOUSE Cystatin-C (Fragment) OS=Mus musculus GN=Cst3 PE=4 SV=1;tr|Q3U5K7|Q3U5K7_MOUSE Putative uncharacterized protein (Fragment) OS=Mus musculus GN=Cst3 PE=2 SV=1;tr|Q9EPX9|Q9EPX9_MOUSE Cystatin C OS=Mus musculus GN=Cst3 PE=2 SV=1;sp|P2146	0	34928000	0	4366000	0	4366000	0	0	47486000	0	1	1	1	10.8	10.8	10.8	11.141	0.0098939	1.1695	34928000	1	0	1	0	0	1	0	0	1	0	0	1	0
236	B2RXU2;A2APY6;Q3V1V3;Q8K089;Q8BK69;Q8BM03;Q9D801	B2RXU2;A2APY6;Q3V1V3	ESF1 homolog	Esf1	tr|B2RXU2|B2RXU2_MOUSE ESF1, nucleolar pre-rRNA processing protein, homolog (S. cerevisiae) OS=Mus musculus GN=Esf1 PE=2 SV=1;tr|A2APY6|A2APY6_MOUSE ESF1, nucleolar pre-rRNA processing protein, homolog (S. cerevisiae) OS=Mus musculus GN=Esf1 PE=2 SV=1;sp|Q	497920000	650590000	574180000	40063000	11580000	15130000	13353000	569200000	672260000	688350000	15	15	15	22.1	22.1	22.1	98.042	0	27.183	1722700000	44	16	15	13	12	12	12	12	12	12	12	12	12
237	A2APY7;A2APY7-2	A2APY7	NADH dehydrogenase [ubiquinone] 1 alpha subcomplex assembly factor 5	Ndufaf5	sp|A2APY7|NDUF5_MOUSE NADH dehydrogenase [ubiquinone] 1 alpha subcomplex assembly factor 5 OS=Mus musculus GN=Ndufaf5 PE=2 SV=1	197570000	169370000	147180000	24482000	9408300	8065200	7008600	221300000	194820000	240050000	5	5	5	19.8	19.8	19.8	38.404	0	7.0169	514120000	8	3	3	2	3	5	3	3	5	3	3	5	3
238	A2AQ17;Q9CWX2	A2AQ17;Q9CWX2	Complex I intermediate-associated protein 30, mitochondrial	Ndufaf1	tr|A2AQ17|A2AQ17_MOUSE Complex I intermediate-associated protein 30, mitochondrial OS=Mus musculus GN=Ndufaf1 PE=4 SV=1;sp|Q9CWX2|CIA30_MOUSE Complex I intermediate-associated protein 30, mitochondrial OS=Mus musculus GN=Ndufaf1 PE=2 SV=2	327550000	369590000	302540000	41653000	13648000	15400000	12606000	337190000	401960000	371300000	10	10	10	30.8	30.8	30.8	37.782	0	20.827	999680000	19	8	5	6	6	6	6	6	6	6	6	6	6
239	A2AQ19;Q3UXG8	A2AQ19;Q3UXG8	RNA polymerase-associated protein RTF1 homolog	Rtf1	sp|A2AQ19|RTF1_MOUSE RNA polymerase-associated protein RTF1 homolog OS=Mus musculus GN=Rtf1 PE=1 SV=1;tr|Q3UXG8|Q3UXG8_MOUSE Putative uncharacterized protein (Fragment) OS=Mus musculus GN=Rtf1 PE=2 SV=1	700900000	380810000	600680000	40057000	16688000	9067000	14302000	618650000	514180000	611800000	11	11	11	16.5	16.5	16.5	80.796	0	24.576	1682400000	22	10	5	7	9	6	7	9	6	7	9	6	7
240	Q61053;F6VVN1;A2AQ43;A2AQ44;A2AQ42;A2AQ45;A2AQ41;Q80TY0-4;Q80TY0-2;Q80TY0-3;Q80TY0	Q61053;F6VVN1;A2AQ43;A2AQ44;A2AQ42;A2AQ45;A2AQ41;Q80TY0-4;Q80TY0-2;Q80TY0-3;Q80TY0	Formin-binding protein 1	Fnbp1	tr|Q61053|Q61053_MOUSE FBP 17 (Fragment) OS=Mus musculus GN=Fnbp1 PE=2 SV=1;tr|F6VVN1|F6VVN1_MOUSE Formin-binding protein 1 (Fragment) OS=Mus musculus GN=Fnbp1 PE=1 SV=1;tr|A2AQ43|A2AQ43_MOUSE Formin-binding protein 1 OS=Mus musculus GN=Fnbp1 PE=1 SV=1;tr|	0	11199000	11610000	2073500	0	1018100	1055500	0	0	10176000	2	2	2	13.9	13.9	13.9	27.173	0.00092994	2.3118	22809000	3	1	1	1	1	1	1	1	1	1	1	1	1
241	A2AQ56;Q8BXJ9;D6RH67	A2AQ56;Q8BXJ9;D6RH67	Transmembrane protein 62	Tmem62	tr|A2AQ56|A2AQ56_MOUSE Transmembrane protein 62 OS=Mus musculus GN=Tmem62 PE=4 SV=1;sp|Q8BXJ9|TMM62_MOUSE Transmembrane protein 62 OS=Mus musculus GN=Tmem62 PE=2 SV=1;tr|D6RH67|D6RH67_MOUSE Transmembrane protein 62 OS=Mus musculus GN=Tmem62 PE=4 SV=1	4975600	38062000	15710000	2554200	216330	1654900	683030	23134000	27932000	17121000	2	2	2	6.2	6.2	6.2	58.667	0.00031995	2.6919	58747000	3	1	1	1	1	2	1	1	2	1	1	2	1
242	A2AQA7;Q8CFQ3;REV__B9EKN1	A2AQA7;Q8CFQ3	Intron-binding protein aquarius	Aqr	tr|A2AQA7|A2AQA7_MOUSE Intron-binding protein aquarius OS=Mus musculus GN=Aqr PE=4 SV=1;sp|Q8CFQ3|AQR_MOUSE Intron-binding protein aquarius OS=Mus musculus GN=Aqr PE=2 SV=2	1929400000	2021000000	2013300000	73626000	23820000	24951000	24855000	2327500000	2211200000	2395700000	37	37	36	38.1	38.1	37.6	161.85	0	125.42	5963700000	106	34	39	33	28	30	29	28	30	29	27	29	28
243	Q8C4G3;Q8C288;Q505G9;A2AQC3;Q6DI68;O70228;Q2HXI8	Q8C4G3;Q8C288;Q505G9;A2AQC3;Q6DI68;O70228	Phospholipid-transporting ATPase;Probable phospholipid-transporting ATPase IIA	Atp9a	tr|Q8C4G3|Q8C4G3_MOUSE Probable phospholipid-transporting ATPase IIA OS=Mus musculus GN=Atp9a PE=2 SV=1;tr|Q8C288|Q8C288_MOUSE ATPase, class II, type 9A, isoform CRA_c OS=Mus musculus GN=Atp9a PE=2 SV=1;tr|Q505G9|Q505G9_MOUSE ATPase, class II, type 9A OS=M	15313000	12711000	12347000	708280	268650	223010	216620	15313000	13254000	11970000	3	1	1	3.4	1.3	1.3	116.42	0.00063012	2.4975	40372000	2	1	1	0	2	2	1	1	1	1	1	1	1
244	A2AQD5;Q922B9;A2AQD6;Q922B9-3;Q3TEM8;Q922B9-2	A2AQD5;Q922B9;A2AQD6;Q922B9-3;Q3TEM8	Sperm-specific antigen 2 homolog	Ssfa2	tr|A2AQD5|A2AQD5_MOUSE Sperm-specific antigen 2 homolog OS=Mus musculus GN=Ssfa2 PE=1 SV=1;sp|Q922B9|SSFA2_MOUSE Sperm-specific antigen 2 homolog OS=Mus musculus GN=Ssfa2 PE=1 SV=3;tr|A2AQD6|A2AQD6_MOUSE Sperm-specific antigen 2 homolog OS=Mus musculus GN=	354330000	377870000	258140000	14781000	5288600	5639800	3852900	472530000	370340000	378820000	9	9	9	12.8	12.8	12.8	134.67	0	45.695	990340000	21	9	6	6	8	7	6	8	7	6	8	7	6
245	A2AQE2;Q6A098;Q6IR00;F6QQ13;Q3TEC4;Q501P3;Q8C7M0	A2AQE2;Q6A098;Q6IR00;F6QQ13	Selenocysteine insertion sequence-binding protein 2-like	Secisbp2l	tr|A2AQE2|A2AQE2_MOUSE SECIS binding protein 2-like OS=Mus musculus GN=Secisbp2l PE=1 SV=1;sp|Q6A098|SBP2L_MOUSE Selenocysteine insertion sequence-binding protein 2-like OS=Mus musculus GN=Secisbp2l PE=1 SV=2;tr|Q6IR00|Q6IR00_MOUSE Secisbp2l protein (Fragm	68290000	38542000	70347000	3543600	1365800	770830	1406900	62712000	69774000	63592000	5	5	5	8.1	8.1	8.1	119.75	0	7.5466	177180000	10	4	2	4	4	2	4	4	2	4	4	2	4
246	A2AQJ7;A2AQJ5;A2AQJ6;Q8BXN9-3;Q8BXN9;Q8BXN9-2	A2AQJ7;A2AQJ5;A2AQJ6;Q8BXN9-3;Q8BXN9;Q8BXN9-2	Transmembrane protein 87A	Tmem87a	tr|A2AQJ7|A2AQJ7_MOUSE Transmembrane protein 87A OS=Mus musculus GN=Tmem87a PE=4 SV=1;tr|A2AQJ5|A2AQJ5_MOUSE Transmembrane protein 87A OS=Mus musculus GN=Tmem87a PE=1 SV=1;tr|A2AQJ6|A2AQJ6_MOUSE Transmembrane protein 87A OS=Mus musculus GN=Tmem87a PE=1 SV=	370650000	204170000	365120000	36151000	14256000	7852700	14043000	422750000	325520000	332690000	10	10	10	20.8	20.8	20.8	57.011	0	22.009	939930000	29	13	5	11	9	7	8	9	7	8	9	7	8
247	A2AQL0;Q9Z1W9;G1JLS7;Q3V256;Q3TR01	A2AQL0;Q9Z1W9;G1JLS7;Q3V256	STE20/SPS1-related proline-alanine-rich protein kinase	Stk39	tr|A2AQL0|A2AQL0_MOUSE Serine/threonine kinase 39, STE20/SPS1 homolog (Yeast) OS=Mus musculus GN=Stk39 PE=4 SV=1;sp|Q9Z1W9|STK39_MOUSE STE20/SPS1-related proline-alanine-rich protein kinase OS=Mus musculus GN=Stk39 PE=1 SV=1;tr|G1JLS7|G1JLS7_MOUSE Kidney-s	179800000	520040000	437590000	45497000	7191900	20802000	17503000	327170000	428160000	490710000	10	8	8	23	20	20	60.319	0	27.254	1137400000	16	2	7	7	4	8	9	3	7	7	3	7	7
248	Q3UQD5;Q3TAG3;A2AQM9;Q71E74;F6M2K0;Q5XJV5;Q9JL19;F6M2K1;F6M2J9;Q6ZQH3	Q3UQD5;Q3TAG3;A2AQM9;Q71E74;F6M2K0;Q5XJV5;Q9JL19;F6M2K1;F6M2J9;Q6ZQH3	Nuclear receptor coactivator 6	Ncoa6;Rap250	tr|Q3UQD5|Q3UQD5_MOUSE Putative uncharacterized protein (Fragment) OS=Mus musculus GN=Ncoa6 PE=2 SV=1;tr|Q3TAG3|Q3TAG3_MOUSE Putative uncharacterized protein (Fragment) OS=Mus musculus GN=Ncoa6 PE=2 SV=1;tr|A2AQM9|A2AQM9_MOUSE Nuclear receptor coactivator	36416000	53849000	64234000	2915100	687090	1016000	1212000	46792000	65031000	56055000	2	2	2	3.4	3.4	3.4	159.53	0	9.9126	154500000	4	1	1	2	1	1	2	1	1	2	1	1	2
249	Q8N9U3;Q8C1A8;Q8C113;A2AQN5;A2AQN4;Q9QXG4;Q8C141;D6RHA7;Q8BY91;F7CU63	Q8N9U3;Q8C1A8;Q8C113;A2AQN5;A2AQN4;Q9QXG4;Q8C141	Acetyl-coenzyme A synthetase, cytoplasmic	Acss2	tr|Q8N9U3|Q8N9U3_MOUSE cDNA fis, clone TRACH2001275, highly similar to Mus musculus acetyl-CoA synthetase mRNA OS=Mus musculus GN=Acss2 PE=2 SV=1;tr|Q8C1A8|Q8C1A8_MOUSE Putative uncharacterized protein OS=Mus musculus GN=Acss2 PE=2 SV=1;tr|Q8C113|Q8C113_MO	160700000	94989000	209750000	14104000	4869800	2878500	6356200	192780000	157240000	176970000	5	5	5	13	13	13	78.82	0	8.1802	465450000	11	3	4	4	3	2	4	3	2	4	3	2	4
250	A2AQU8;Q9D975	A2AQU8;Q9D975	Sulfiredoxin-1	Srxn1	tr|A2AQU8|A2AQU8_MOUSE Sulfiredoxin OS=Mus musculus GN=Srxn1 PE=3 SV=1;sp|Q9D975|SRXN1_MOUSE Sulfiredoxin-1 OS=Mus musculus GN=Srxn1 PE=2 SV=1	23514000	57325000	53786000	13463000	2351400	5732500	5378600	5910500	21712000	125010000	3	3	3	40	40	40	16.063	0.0012351	2.2622	134630000	5	1	2	2	2	3	2	2	3	2	2	3	2
251	Q3U2T1;A2AQV2;Q3U3W1;Q80V53	Q3U2T1;A2AQV2;Q3U3W1;Q80V53	Carbohydrate sulfotransferase 14	Chst14	tr|Q3U2T1|Q3U2T1_MOUSE Putative uncharacterized protein OS=Mus musculus GN=Chst14 PE=2 SV=1;tr|A2AQV2|A2AQV2_MOUSE Carbohydrate sulfotransferase 14 OS=Mus musculus GN=Chst14 PE=4 SV=1;tr|Q3U3W1|Q3U3W1_MOUSE Dermatan 4 sulfotransferase 1 OS=Mus musculus GN=	123450000	94718000	39233000	13548000	6497600	4985200	2064900	106520000	107830000	105000000	6	6	6	22.5	22.5	22.5	40.054	0	10.149	257400000	8	3	3	2	2	4	2	2	4	2	2	4	2
252	A2AQY8;Q05CI8;Q8BTY1	A2AQY8;Q05CI8;Q8BTY1	Kynurenine--oxoglutarate transaminase 1	Ccbl1	tr|A2AQY8|A2AQY8_MOUSE Kynurenine--oxoglutarate transaminase 1 OS=Mus musculus GN=Ccbl1 PE=1 SV=1;tr|Q05CI8|Q05CI8_MOUSE Ccbl1 protein OS=Mus musculus GN=Ccbl1 PE=2 SV=1;sp|Q8BTY1|KAT1_MOUSE Kynurenine--oxoglutarate transaminase 1 OS=Mus musculus GN=Ccbl1	8425400	7539400	10299000	1641500	526590	471210	643680	10880000	10125000	13190000	1	1	1	3.5	3.5	3.5	42.235	0.00032144	2.7616	26264000	3	1	1	1	1	1	1	1	1	1	1	1	1
253	A2AQZ2;A2AQZ7;B7ZNN8;Q9DB26;D6RIQ3;D6RI61;A2AQZ5	A2AQZ2;A2AQZ7;B7ZNN8;Q9DB26;D6RIQ3;D6RI61;A2AQZ5	Phytanoyl-CoA dioxygenase domain-containing protein 1	Phyhd1	tr|A2AQZ2|A2AQZ2_MOUSE Phytanoyl-CoA dioxygenase domain-containing protein 1 (Fragment) OS=Mus musculus GN=Phyhd1 PE=4 SV=1;tr|A2AQZ7|A2AQZ7_MOUSE Phytanoyl-CoA dioxygenase domain-containing protein 1 OS=Mus musculus GN=Phyhd1 PE=4 SV=1;tr|B7ZNN8|B7ZNN8_MO	12034000	0	28023000	2861200	859540	0	2001700	14740000	0	0	3	3	3	23.3	23.3	23.3	27.915	0	5.3014	40057000	3	2	0	1	2	0	1	2	0	1	2	0	1
254	Q05CC5;Q504N1;Q05DE4;B2RWT5;A2AR02;Q80VC1;A2AR01;Q3UZ38	Q05CC5;Q504N1;Q05DE4;B2RWT5;A2AR02;Q80VC1;A2AR01;Q3UZ38	Peptidyl-prolyl cis-trans isomerase G;Peptidyl-prolyl cis-trans isomerase	Ppig	tr|Q05CC5|Q05CC5_MOUSE Ppig protein (Fragment) OS=Mus musculus GN=Ppig PE=2 SV=1;tr|Q504N1|Q504N1_MOUSE Ppig protein (Fragment) OS=Mus musculus GN=Ppig PE=2 SV=1;tr|Q05DE4|Q05DE4_MOUSE Ppig protein (Fragment) OS=Mus musculus GN=Ppig PE=2 SV=1;tr|B2RWT5|B2R	915910000	651680000	957520000	126260000	45795000	32584000	47876000	1080800000	1079500000	972200000	7	7	7	21.3	21.3	21.3	46.291	0	18.56	2525100000	23	7	7	9	7	6	6	7	6	6	7	6	6
255	A2AR12;Q8BKH7-2;Q8BKH7;A2AR15;Q8BKH7-3	A2AR12;Q8BKH7-2;Q8BKH7;A2AR15;Q8BKH7-3	Target of rapamycin complex 2 subunit MAPKAP1	Mapkap1	tr|A2AR12|A2AR12_MOUSE Target of rapamycin complex 2 subunit MAPKAP1 (Fragment) OS=Mus musculus GN=Mapkap1 PE=4 SV=1;sp|Q8BKH7-2|SIN1_MOUSE Isoform 2 of Target of rapamycin complex 2 subunit MAPKAP1 OS=Mus musculus GN=Mapkap1;sp|Q8BKH7|SIN1_MOUSE Target of	170390000	132970000	96809000	14291000	6085200	4748800	3457400	147050000	178620000	180000000	9	9	9	23.6	23.6	23.6	58.608	0	13.23	400160000	15	6	5	4	5	5	5	5	5	5	5	5	5
256	A2AR26;Q8BTN2;Q3UDF0;Q3TLU5;A2AR27	A2AR26;Q8BTN2;Q3UDF0;Q3TLU5;A2AR27		Slc2a6	tr|A2AR26|A2AR26_MOUSE Protein Slc2a6 OS=Mus musculus GN=Slc2a6 PE=1 SV=1;tr|Q8BTN2|Q8BTN2_MOUSE Putative uncharacterized protein OS=Mus musculus GN=Slc2a6 PE=2 SV=1;tr|Q3UDF0|Q3UDF0_MOUSE Protein Slc2a6 OS=Mus musculus GN=Slc2a6 PE=1 SV=1;tr|Q3TLU5|Q3TLU5	0	27650000	0	1626500	0	1626500	0	0	29601000	0	4	4	4	12.4	12.4	12.4	48.547	0.00016866	3.4675	27650000	3	1	2	0	1	3	0	1	3	0	1	3	0
257	B0R0D5;B0R0D4;A2AR56;Q6P5H6;Q8BXT6;F6XM46;Q6P5H6-4;Q6P5H6-3;Q6P5H6-2;F2Z484;Q8BX61;Q8BW31;F6XLQ6	B0R0D5;B0R0D4;A2AR56;Q6P5H6;Q8BXT6;F6XM46;Q6P5H6-4;Q6P5H6-3;Q6P5H6-2;F2Z484;Q8BX61;Q8BW31	FERM domain-containing protein 5	Frmd5	tr|B0R0D5|B0R0D5_MOUSE FERM domain-containing protein 5 (Fragment) OS=Mus musculus GN=Frmd5 PE=4 SV=1;tr|B0R0D4|B0R0D4_MOUSE FERM domain-containing protein 5 (Fragment) OS=Mus musculus GN=Frmd5 PE=4 SV=1;tr|A2AR56|A2AR56_MOUSE FERM domain-containing protei	7531700	24163000	41266000	2210900	228230	732200	1250500	0	32992000	34456000	4	4	4	7.4	7.4	7.4	56.384	0	4.0436	72960000	8	3	2	3	3	2	3	3	2	3	3	2	3
258	A2ARA8;G3UYN5;G3UYV5;A2ARA8-2	A2ARA8	Integrin alpha-8;Integrin alpha-8 heavy chain;Integrin alpha-8 light chain	Itga8	sp|A2ARA8|ITA8_MOUSE Integrin alpha-8 OS=Mus musculus GN=Itga8 PE=1 SV=1	625990000	701590000	916780000	44887000	12520000	14032000	18336000	735970000	920480000	872980000	12	12	12	17.1	17.1	17.1	117.55	0	21.363	2244400000	32	9	12	11	9	9	10	9	9	10	9	9	10
259	A2ARP8;Q9QYR6;Q9QYR6-2	A2ARP8;Q9QYR6;Q9QYR6-2	Microtubule-associated protein 1A;MAP1A heavy chain;MAP1 light chain LC2	Map1a	tr|A2ARP8|A2ARP8_MOUSE Microtubule-associated protein 1A OS=Mus musculus GN=Map1a PE=1 SV=1;sp|Q9QYR6|MAP1A_MOUSE Microtubule-associated protein 1A OS=Mus musculus GN=Map1a PE=1 SV=2;sp|Q9QYR6-2|MAP1A_MOUSE Isoform 2 of Microtubule-associated protein 1A OS	2358600000	1841400000	2645000000	47535000	16379000	12788000	18368000	2731100000	2765000000	2764100000	51	48	48	28.6	27.8	27.8	325.88	0	163.43	6845100000	136	48	39	49	40	35	44	38	33	41	38	33	41
260	Q569M1;E9QA51;Q569M0;A2AW67;A2ARX1;A2BFG5;A2ART0;A2ARW8;Q2TBY2;L7N246;A2AW66;A2ARR6;A2ARW1;F7CEW8;A2BE23;A2ART4;A2ARR7;A2BG91;A2BFG8	Q569M1;E9QA51;Q569M0;A2AW67;A2ARX1;A2BFG5;A2ART0;A2ARW8;Q2TBY2;L7N246;A2AW66;A2ARR6;A2ARW1;F7CEW8;A2BE23;A2ART4;A2ARR7;A2BG91		Gm14325;Gm14399;Gm14391;Gm14326;Gm6710;Gm14322;Gm14418;Gm14410;Gm4631;Gm14305;Gm14434;Gm14412;Gm14295	tr|Q569M1|Q569M1_MOUSE Predicted gene, OTTMUSG00000016325 OS=Mus musculus GN=Gm14325 PE=2 SV=1;tr|E9QA51|E9QA51_MOUSE Protein Gm14399 OS=Mus musculus GN=Gm14399 PE=4 SV=1;tr|Q569M0|Q569M0_MOUSE OTTMUSG00000016325 protein (Fragment) OS=Mus musculus GN=Gm143	39115000	68276000	33772000	6722000	1862600	3251200	1608200	49386000	55441000	63622000	3	2	2	20.4	9.3	9.3	31.534	0	5.3142	141160000	6	1	4	1	1	3	2	1	2	1	1	2	1
261	A2AS45;Q68FH0-2;Q68FH0;Q3UIX3;A2AS44;Q05D18;A2AS47;Q3US07;Q3USD8	A2AS45;Q68FH0-2;Q68FH0;Q3UIX3;A2AS44;Q05D18;A2AS47	Plakophilin-4	Pkp4	tr|A2AS45|A2AS45_MOUSE Plakophilin-4 OS=Mus musculus GN=Pkp4 PE=1 SV=1;sp|Q68FH0-2|PKP4_MOUSE Isoform 2 of Plakophilin-4 OS=Mus musculus GN=Pkp4;sp|Q68FH0|PKP4_MOUSE Plakophilin-4 OS=Mus musculus GN=Pkp4 PE=1 SV=1;tr|Q3UIX3|Q3UIX3_MOUSE Putative uncharacte	1187300000	22248000	29534000	16973000	16264000	304760	404570	0	23864000	29991000	6	6	5	6.7	6.7	5.8	128.53	0	5.4599	1239000000	11	3	3	5	2	3	4	2	3	4	2	3	3
262	A2AS54;Q3UGP2;Q8K2I9;Q8K2I9-2	A2AS54;Q3UGP2;Q8K2I9	F-box only protein 18	Fbxo18	tr|A2AS54|A2AS54_MOUSE F-box only protein 18 OS=Mus musculus GN=Fbxo18 PE=4 SV=1;tr|Q3UGP2|Q3UGP2_MOUSE Putative uncharacterized protein OS=Mus musculus GN=Fbxo18 PE=2 SV=1;sp|Q8K2I9|FBX18_MOUSE F-box only protein 18 OS=Mus musculus GN=Fbxo18 PE=2 SV=1	1481300000	106010000	255420000	30208000	24283000	1737900	4187300	338100000	416660000	1491300000	3	3	3	3.4	3.4	3.4	115.07	0.0066938	1.3345	1842700000	15	4	6	5	2	3	2	2	3	2	2	3	2
263	A2AS70;Q5DTL6;O54826;Q8C7B0;A2AS72	A2AS70;Q5DTL6;O54826;Q8C7B0	Protein AF-10	Mllt10	tr|A2AS70|A2AS70_MOUSE Protein AF-10 OS=Mus musculus GN=Mllt10 PE=4 SV=1;tr|Q5DTL6|Q5DTL6_MOUSE MKIAA4140 protein (Fragment) OS=Mus musculus GN=Mllt10 PE=2 SV=1;sp|O54826|AF10_MOUSE Protein AF-10 OS=Mus musculus GN=Mllt10 PE=1 SV=2;tr|Q8C7B0|Q8C7B0_MOUSE P	70639000	13922000	28454000	4346700	2716900	535470	1094400	39927000	48454000	42368000	5	5	5	8.7	8.7	8.7	104.53	0	4.1065	113020000	6	3	1	2	5	1	2	5	1	2	5	1	2
264	A2ASR6;A2ASR7;A2ASR8;Q3ULL2;Q2LC58;P25916;A2ASR5;P23798	A2ASR6;A2ASR7;A2ASR8;Q3ULL2;Q2LC58;P25916;A2ASR5;P23798	Polycomb complex protein BMI-1;Polycomb group RING finger protein 2	Bmi1;Pcgf2	tr|A2ASR6|A2ASR6_MOUSE Polycomb complex protein BMI-1 (Fragment) OS=Mus musculus GN=Bmi1 PE=4 SV=1;tr|A2ASR7|A2ASR7_MOUSE Polycomb complex protein BMI-1 (Fragment) OS=Mus musculus GN=Bmi1 PE=4 SV=1;tr|A2ASR8|A2ASR8_MOUSE Polycomb complex protein BMI-1 (Fra	91012000	139710000	126060000	59465000	15169000	23285000	21011000	130550000	166570000	163790000	2	2	2	17.1	17.1	17.1	12.248	0.00062588	2.4275	356790000	4	1	2	1	1	2	1	1	2	1	1	2	1
265	A2ASS6;E9Q8N1;E9Q8K5;A2ASS6-2;Q3TZL3;F7CR78;A2AT62;F6Q6Z0;Q8BM32;Q812E1;F6RSJ3	A2ASS6;E9Q8N1;E9Q8K5;A2ASS6-2	Titin	Ttn	sp|A2ASS6|TITIN_MOUSE Titin OS=Mus musculus GN=Ttn PE=1 SV=1;tr|E9Q8N1|E9Q8N1_MOUSE Titin OS=Mus musculus GN=Ttn PE=1 SV=1;tr|E9Q8K5|E9Q8K5_MOUSE Titin OS=Mus musculus GN=Ttn PE=1 SV=1;sp|A2ASS6-2|TITIN_MOUSE Isoform 2 of Titin OS=Mus musculus GN=Ttn	381010000	373470000	82157000	355860	162060	158860	34946	407220000	516390000	0	12	10	9	0.4	0.4	0.3	3906.4	0.00016929	3.5421	836640000	14	5	8	1	8	8	4	6	6	2	5	6	2
266	A2ASY0;A2ASY1;Q5HZG4;Q8BKP6;Q505H1;Q05BL5;Q5HZG4-2	A2ASY0;A2ASY1;Q5HZG4;Q8BKP6;Q505H1;Q05BL5	Transcription initiation factor TFIID subunit 3	Taf3	tr|A2ASY0|A2ASY0_MOUSE Transcription initiation factor TFIID subunit 3 OS=Mus musculus GN=Taf3 PE=1 SV=1;tr|A2ASY1|A2ASY1_MOUSE TAF3 RNA polymerase II, TATA box binding protein (TBP)-associated factor OS=Mus musculus GN=Taf3 PE=2 SV=1;sp|Q5HZG4|TAF3_MOUSE	0	946250	693060000	19278000	0	26285	19252000	0	0	864500000	3	3	3	3.9	3.9	3.9	87.867	1	-2	694000000	3	0	1	2	0	1	2	0	1	2	0	1	2
267	A2ASZ8-2;A2ASZ8-3;A2ASZ8;A2ASZ8-4;A2ASZ8-5;Z4YLR9;F6RC04;F6X0P2;Q6GQS1	A2ASZ8-2;A2ASZ8-3;A2ASZ8;A2ASZ8-4;A2ASZ8-5;Z4YLR9	Calcium-binding mitochondrial carrier protein SCaMC-2	Slc25a25	sp|A2ASZ8-2|SCMC2_MOUSE Isoform 2 of Calcium-binding mitochondrial carrier protein SCaMC-2 OS=Mus musculus GN=Slc25a25;sp|A2ASZ8-3|SCMC2_MOUSE Isoform 3 of Calcium-binding mitochondrial carrier protein SCaMC-2 OS=Mus musculus GN=Slc25a25;sp|A2ASZ8|SCMC2_MO	342940000	283340000	26279000	21752000	11431000	9444500	875980	419160000	247490000	0	6	6	6	17.7	17.7	17.7	55.287	0	7.3866	652550000	8	2	3	3	2	2	3	2	2	3	2	2	3
268	A2AT37;Q810R2	A2AT37		Upf2	tr|A2AT37|A2AT37_MOUSE Protein Upf2 OS=Mus musculus GN=Upf2 PE=2 SV=1	389710000	555680000	471740000	19683000	5412700	7717800	6552000	578240000	578560000	599290000	17	17	9	19.5	19.5	8.7	147.55	0	26.272	1417100000	45	16	17	12	12	12	12	12	12	12	5	7	7
269	Q3TG07;A2ATI9;Q3TX06;Q3TIK1;Q99JX3;A2ATI8;A2ATI6;Q99JX3-2;Q3V458;Q922I9	Q3TG07;A2ATI9;Q3TX06;Q3TIK1;Q99JX3;A2ATI8;A2ATI6;Q99JX3-2;Q3V458	Golgi reassembly-stacking protein 2	Gorasp2	tr|Q3TG07|Q3TG07_MOUSE Putative uncharacterized protein OS=Mus musculus GN=Gorasp2 PE=2 SV=1;tr|A2ATI9|A2ATI9_MOUSE Golgi reassembly stacking protein 2, isoform CRA_d OS=Mus musculus GN=Gorasp2 PE=1 SV=1;tr|Q3TX06|Q3TX06_MOUSE Putative uncharacterized prot	1651300000	2177000000	1751100000	371960000	110080000	145140000	116740000	1987100000	2075100000	2030700000	11	11	11	34.1	34.1	34.1	44.999	0	56.425	5579400000	42	16	13	13	11	9	9	11	9	9	11	9	9
270	A2ATN9;Q9ES70	A2ATN9;Q9ES70	Serine/threonine-protein kinase Nek6	Nek6	tr|A2ATN9|A2ATN9_MOUSE Serine/threonine-protein kinase Nek6 OS=Mus musculus GN=Nek6 PE=4 SV=1;sp|Q9ES70|NEK6_MOUSE Serine/threonine-protein kinase Nek6 OS=Mus musculus GN=Nek6 PE=1 SV=1	12585000	58700000	23746000	4751600	629250	2935000	1187300	29562000	49860000	33129000	5	3	3	24.2	18.5	18.5	34.721	0.00092951	2.3077	95031000	6	1	4	1	2	5	2	1	3	1	1	3	1
271	A2VCP7;A2AU35;Q8BHL8	A2VCP7;A2AU35;Q8BHL8	Proteasome inhibitor PI31 subunit	Psmf1	tr|A2VCP7|A2VCP7_MOUSE Psmf1 protein (Fragment) OS=Mus musculus GN=Psmf1 PE=2 SV=1;tr|A2AU35|A2AU35_MOUSE Proteasome (Prosome, macropain) inhibitor subunit 1 OS=Mus musculus GN=Psmf1 PE=2 SV=1;sp|Q8BHL8|PSMF1_MOUSE Proteasome inhibitor PI31 subunit OS=Mus	91112000	131630000	195820000	32197000	7008600	10125000	15063000	186610000	155260000	192500000	2	2	2	13.9	13.9	13.9	26.073	0	8.138	418560000	11	3	4	4	1	2	2	1	2	2	1	2	2
272	Q3U3F6;A2AU62;Q64012-2;Q64012;Q3TGD3;A2AU61;A2AU60	Q3U3F6;A2AU62;Q64012-2;Q64012;Q3TGD3;A2AU61;A2AU60	RNA-binding protein Raly	Raly	tr|Q3U3F6|Q3U3F6_MOUSE HnRNP-associated with lethal yellow, isoform CRA_f OS=Mus musculus GN=Raly PE=2 SV=1;tr|A2AU62|A2AU62_MOUSE RNA-binding protein Raly (Fragment) OS=Mus musculus GN=Raly PE=1 SV=1;sp|Q64012-2|RALY_MOUSE Isoform 1 of RNA-binding protein	7864000000	7390100000	7864300000	1216800000	413900000	388950000	413910000	8361100000	9073000000	8641800000	16	16	16	55.7	55.7	55.7	31.198	0	109.97	23118000000	101	34	31	36	12	15	15	12	15	15	12	15	15
273	A2AU83;F6ZS36;L7N208;F6T2D2;A3KQJ7;A2ART2;Q08BU3;Q3UML8;A2AQA1	A2AU83;F6ZS36;L7N208		Gm14124;Gm14139;Gm10324	tr|A2AU83|A2AU83_MOUSE Protein Gm14124 OS=Mus musculus GN=Gm14124 PE=4 SV=1;tr|F6ZS36|F6ZS36_MOUSE Protein Gm14139 OS=Mus musculus GN=Gm14139 PE=4 SV=1;tr|L7N208|L7N208_MOUSE Protein Gm10324 OS=Mus musculus GN=Gm10324 PE=4 SV=1	0	10264000	0	173970	0	173970	0	0	13785000	0	3	2	2	5.9	3.8	3.8	83.427	0.0012353	2.263	10264000	1	0	1	0	1	3	2	1	2	1	1	2	1
274	A2AU91;P70399;A2AU89;P70399-3;P70399-2;Q8BLA0;A2AU90;Q3V1P7;Q8C0U1;Q8BZ87;Q3UG49;F6QNC8;F6ZRL3;F6S5E4;F7CE65	A2AU91;P70399;A2AU89;P70399-3;P70399-2	Tumor suppressor p53-binding protein 1	Trp53bp1;Tp53bp1	tr|A2AU91|A2AU91_MOUSE Tumor suppressor p53-binding protein 1 OS=Mus musculus GN=Trp53bp1 PE=1 SV=1;sp|P70399|TP53B_MOUSE Tumor suppressor p53-binding protein 1 OS=Mus musculus GN=Tp53bp1 PE=1 SV=2;tr|A2AU89|A2AU89_MOUSE Tumor suppressor p53-binding protei	1142200000	1459100000	1295400000	40591000	11898000	15199000	13494000	1382200000	1561300000	1440900000	33	33	33	29.4	29.4	29.4	212.73	0	123.96	3896800000	92	33	29	30	25	26	24	25	26	24	25	26	24
275	Q3TAI4;Q9CZ22;A2AUD5;Q9CYZ2;V9GWU5	Q3TAI4;Q9CZ22;A2AUD5;Q9CYZ2;V9GWU5	Tumor protein D54	Tpd52l2	tr|Q3TAI4|Q3TAI4_MOUSE Tumor protein D52-like 2, isoform CRA_c OS=Mus musculus GN=Tpd52l2 PE=1 SV=1;tr|Q9CZ22|Q9CZ22_MOUSE Putative uncharacterized protein OS=Mus musculus GN=Tpd52l2 PE=2 SV=1;tr|A2AUD5|A2AUD5_MOUSE Tumor protein D54 OS=Mus musculus GN=Tpd	4406600000	4024800000	4491100000	923040000	314760000	287490000	320800000	5376700000	5356700000	5410200000	12	12	3	58.7	58.7	10.7	22.466	0	88.659	12923000000	63	25	20	18	12	10	11	12	10	11	3	2	3
276	A2AUF7;B0R0S4;Q8VCH5;Q3U6R8;D6RGR6;D6RHN6	A2AUF7;B0R0S4;Q8VCH5	Rab9 effector protein with kelch motifs	Rabepk	tr|A2AUF7|A2AUF7_MOUSE Rab9 effector protein with kelch motifs OS=Mus musculus GN=Rabepk PE=4 SV=1;tr|B0R0S4|B0R0S4_MOUSE Rab9 effector protein with kelch motifs OS=Mus musculus GN=Rabepk PE=4 SV=1;sp|Q8VCH5|RABEK_MOUSE Rab9 effector protein with kelch mot	4400800	39110000	51515000	6335000	293390	2607300	3434300	28012000	0	54665000	5	5	5	19	19	19	34.581	0	11.696	95025000	6	1	2	3	1	2	3	1	2	3	1	2	3
277	A2AUK8;A2AUK7;B6ZHC9;A2AUK5;A2AUK6;Q9Z2H5-3;Q9Z2H5-2;Q9Z2H5;Q8C8P2;E9PV14;B6ZHC4	A2AUK8;A2AUK7;B6ZHC9;A2AUK5;A2AUK6;Q9Z2H5-3;Q9Z2H5-2;Q9Z2H5;Q8C8P2;E9PV14	Band 4.1-like protein 1	Epb4.1l1;Epb41l1	tr|A2AUK8|A2AUK8_MOUSE Band 4.1-like protein 1 OS=Mus musculus GN=Epb4.1l1 PE=1 SV=1;tr|A2AUK7|A2AUK7_MOUSE Band 4.1-like protein 1 OS=Mus musculus GN=Epb4.1l1 PE=1 SV=1;tr|B6ZHC9|B6ZHC9_MOUSE Erythrocyte protein band 4.1-like 1 OS=Mus musculus GN=Epb4.1l1	876440000	667190000	612470000	42277000	17185000	13082000	12009000	778850000	929980000	973410000	16	14	14	25	21.9	21.9	96.852	0	48.188	2156100000	45	16	15	14	14	14	12	12	12	10	12	12	10
278	A2AUM2;A2AUM1;A2AUM0;Q9QZ05-2;Q9QZ05-3;Q9QZ05;Q9QZ05-4;A2AUL9;Q9QZ05-5;Q9QZ05-6	A2AUM2;A2AUM1;A2AUM0;Q9QZ05-2;Q9QZ05-3;Q9QZ05;Q9QZ05-4	Eukaryotic translation initiation factor 2-alpha kinase 4	Eif2ak4	tr|A2AUM2|A2AUM2_MOUSE Eukaryotic translation initiation factor 2-alpha kinase 4 OS=Mus musculus GN=Eif2ak4 PE=4 SV=1;tr|A2AUM1|A2AUM1_MOUSE Eukaryotic translation initiation factor 2-alpha kinase 4 OS=Mus musculus GN=Eif2ak4 PE=4 SV=1;tr|A2AUM0|A2AUM0_MOU	105580000	232240000	50023000	4788200	1303500	2867200	617560	236450000	207380000	0	8	8	8	7.6	7.6	7.6	173.12	0	6.7863	387850000	9	4	3	2	4	5	2	4	5	2	4	5	2
279	A2AUT4;Q3UA16-2;Q3UA16;A2AUT1;A2AUT3;Q3UA16-3	A2AUT4;Q3UA16-2;Q3UA16;A2AUT1;A2AUT3;Q3UA16-3	Kinetochore protein Spc25	Spc25	tr|A2AUT4|A2AUT4_MOUSE Kinetochore protein Spc25 (Fragment) OS=Mus musculus GN=Spc25 PE=4 SV=1;sp|Q3UA16-2|SPC25_MOUSE Isoform 2 of Kinetochore protein Spc25 OS=Mus musculus GN=Spc25;sp|Q3UA16|SPC25_MOUSE Kinetochore protein Spc25 OS=Mus musculus GN=Spc25	99037000	22177000	97544000	19887000	9003300	2016100	8867600	98620000	46166000	87048000	2	2	2	14.7	14.7	14.7	24.233	0	4.5397	218760000	7	3	1	3	2	1	2	2	1	2	2	1	2
280	Q52KF5;F6QQP6;F6RK07;A2AUX5;A2AUX3;B7ZD29;Q3U2G7;Q3UHC7-2;Q3UHC7-4;Q3UHC7-3;Q3UHC7	Q52KF5;F6QQP6;F6RK07;A2AUX5;A2AUX3;B7ZD29;Q3U2G7;Q3UHC7-2;Q3UHC7-4;Q3UHC7-3;Q3UHC7	Disabled homolog 2-interacting protein	Dab2ip	tr|Q52KF5|Q52KF5_MOUSE Dab2ip protein (Fragment) OS=Mus musculus GN=Dab2ip PE=2 SV=1;tr|F6QQP6|F6QQP6_MOUSE Disabled homolog 2-interacting protein (Fragment) OS=Mus musculus GN=Dab2ip PE=4 SV=1;tr|F6RK07|F6RK07_MOUSE Disabled homolog 2-interacting protein	23559000	55844000	570430000	13538000	490820	1163400	11884000	0	343940000	306640000	5	4	4	12.8	10.7	10.7	77.545	0	7.1838	649830000	5	1	2	2	1	2	3	1	2	2	1	2	2
281	A2AUX8;Q9D0I6;F6R860	A2AUX8;Q9D0I6;F6R860	WD repeat, SAM and U-box domain-containing protein 1	Wdsub1	tr|A2AUX8|A2AUX8_MOUSE WD repeat, SAM and U-box domain-containing protein 1 OS=Mus musculus GN=Wdsub1 PE=4 SV=1;sp|Q9D0I6|WSDU1_MOUSE WD repeat, SAM and U-box domain-containing protein 1 OS=Mus musculus GN=Wdsub1 PE=2 SV=1;tr|F6R860|F6R860_MOUSE WD repeat,	0	21607000	177920000	9976600	0	1080400	8896200	0	0	251620000	2	2	2	6.4	6.4	6.4	45.592	0.00093371	2.3531	199530000	2	0	1	1	0	1	1	0	1	1	0	1	1
282	A2AUY4;B9EKB5;Q69ZI8;A0PJF0;Q3UGV3;Q8C0K4;A2AUY3	A2AUY4;B9EKB5;Q69ZI8		Baz2b	tr|A2AUY4|A2AUY4_MOUSE Protein Baz2b OS=Mus musculus GN=Baz2b PE=4 SV=1;tr|B9EKB5|B9EKB5_MOUSE Baz2b protein OS=Mus musculus GN=Baz2b PE=2 SV=1;tr|Q69ZI8|Q69ZI8_MOUSE MKIAA1476 protein (Fragment) OS=Mus musculus GN=Baz2b PE=2 SV=1	296150000	204870000	38491000	5138200	2820400	1951200	366580	250950000	200230000	183070000	6	6	6	3.2	3.2	3.2	234	0.00062735	2.4463	539510000	8	1	5	2	2	5	3	2	5	3	2	5	3
283	A2AVJ7;Q99PL5;Q6ZPS0;Q99PL5-10;Q99PL5-9;Q99PL5-8;Q99PL5-7;Q99PL5-6;Q99PL5-5;Q99PL5-4;Q99PL5-3;Q99PL5-2;Q99PL5-12;Q99PL5-11;Q8C7E8;Q8CAB9;Q3ULC0;Q3T9Z9-4	A2AVJ7;Q99PL5;Q6ZPS0	Ribosome-binding protein 1	Rrbp1	tr|A2AVJ7|A2AVJ7_MOUSE Ribosome-binding protein 1 OS=Mus musculus GN=Rrbp1 PE=1 SV=1;sp|Q99PL5|RRBP1_MOUSE Ribosome-binding protein 1 OS=Mus musculus GN=Rrbp1 PE=1 SV=2;tr|Q6ZPS0|Q6ZPS0_MOUSE MKIAA1398 protein (Fragment) OS=Mus musculus GN=Rrbp1 PE=2 SV=1	14663000000	14281000000	15787000000	385610000	126400000	123110000	136090000	15796000000	15741000000	16786000000	50	50	50	37.8	37.8	37.8	158.39	0	320.53	44731000000	255	86	86	83	46	44	44	46	44	44	46	44	44
284	B2RRC5;A2AWA9;A2AWA9-2;A2AWA7;A2AWA9-3;A2AWB0;A6H6A9-3	B2RRC5;A2AWA9;A2AWA9-2	Rab GTPase-activating protein 1	Rabgap1	tr|B2RRC5|B2RRC5_MOUSE RAB GTPase activating protein 1 OS=Mus musculus GN=Rabgap1 PE=2 SV=1;sp|A2AWA9|RBGP1_MOUSE Rab GTPase-activating protein 1 OS=Mus musculus GN=Rabgap1 PE=1 SV=1;sp|A2AWA9-2|RBGP1_MOUSE Isoform 2 of Rab GTPase-activating protein 1 OS=M	1592900000	1597700000	1474100000	70679000	24135000	24208000	22335000	1770900000	2080900000	1828800000	21	21	20	22.9	22.9	22.1	120.8	0	47.625	4664800000	68	25	20	23	18	16	16	18	16	16	17	15	15
285	A2AWF8;A2AWF9;E9Q4S7;Q64455;Q61373;Q3V2L7	A2AWF8;A2AWF9;E9Q4S7;Q64455	Protein-tyrosine-phosphatase;Receptor-type tyrosine-protein phosphatase eta	Ptprj	tr|A2AWF8|A2AWF8_MOUSE Receptor-type tyrosine-protein phosphatase eta OS=Mus musculus GN=Ptprj PE=4 SV=1;tr|A2AWF9|A2AWF9_MOUSE Receptor-type tyrosine-protein phosphatase eta OS=Mus musculus GN=Ptprj PE=4 SV=1;tr|E9Q4S7|E9Q4S7_MOUSE Receptor-type tyrosine-	119150000	137800000	70361000	5844700	2127600	2460700	1256400	138280000	149900000	145340000	8	8	8	9.4	9.4	9.4	128.71	0	10.241	327300000	13	5	5	3	7	4	4	7	4	4	7	4	4
286	A2AWI9;B0LDS3;A2AWI7;Q8R3V5-3;Q8R3V5-1;Q8R3V5	A2AWI9;B0LDS3;A2AWI7;Q8R3V5-3;Q8R3V5-1;Q8R3V5	Endophilin-B2	Sh3glb2	tr|A2AWI9|A2AWI9_MOUSE Endophilin-B2 OS=Mus musculus GN=Sh3glb2 PE=4 SV=1;tr|B0LDS3|B0LDS3_MOUSE Stimulator of prostatic adenocarcinoma-specific T-cells-1 OS=Mus musculus GN=Sh3glb2 PE=2 SV=1;tr|A2AWI7|A2AWI7_MOUSE Endophilin-B2 OS=Mus musculus GN=Sh3glb2	139870000	89105000	72505000	13704000	6357600	4050200	3295700	154450000	112210000	0	6	5	5	12.8	10.7	10.7	41.81	0	4.6566	301480000	9	3	3	3	4	5	3	3	4	2	3	4	2
287	A2AWJ3;Q9JMF7	A2AWJ3;Q9JMF7	Dolichyldiphosphatase 1	Dolpp1	tr|A2AWJ3|A2AWJ3_MOUSE Dolichyl pyrophosphate phosphatase 1, isoform CRA_b OS=Mus musculus GN=Dolpp1 PE=4 SV=1;sp|Q9JMF7|DOPP1_MOUSE Dolichyldiphosphatase 1 OS=Mus musculus GN=Dolpp1 PE=2 SV=1	0	0	31189000	3118900	0	0	3118900	0	0	27336000	1	1	1	8.7	8.7	8.7	22.186	0.00033069	3.1273	31189000	1	0	0	1	0	0	1	0	0	1	0	0	1
288	H7BX50;E9QLG3;A2AWL7-2;A2AWL7-3;A2AWL7;A2AWL7-4;Q3ULI0	H7BX50;E9QLG3;A2AWL7-2;A2AWL7-3;A2AWL7;A2AWL7-4	MAX gene-associated protein	Mga	tr|H7BX50|H7BX50_MOUSE MAX gene-associated protein OS=Mus musculus GN=Mga PE=4 SV=1;tr|E9QLG3|E9QLG3_MOUSE MAX gene-associated protein OS=Mus musculus GN=Mga PE=4 SV=1;sp|A2AWL7-2|MGAP_MOUSE Isoform 2 of MAX gene-associated protein OS=Mus musculus GN=Mga;s	12284000	63164000	48750000	717910	71008	365110	281790	0	74969000	49860000	5	5	5	2.8	2.8	2.8	312.13	0	7.3225	124200000	11	1	6	4	1	4	3	1	4	3	1	4	3
289	A2AWN8;P59326;Q3TH60;Q3U8D6;Q8BUI8	A2AWN8;P59326;Q3TH60	YTH domain-containing family protein 1	Ythdf1	tr|A2AWN8|A2AWN8_MOUSE YTH domain family 1, isoform CRA_a OS=Mus musculus GN=Ythdf1 PE=4 SV=1;sp|P59326|YTHD1_MOUSE YTH domain-containing family protein 1 OS=Mus musculus GN=Ythdf1 PE=2 SV=1;tr|Q3TH60|Q3TH60_MOUSE Putative uncharacterized protein (Fragment	666840000	480200000	551090000	73832000	28993000	20878000	23960000	720880000	690760000	668630000	13	8	8	28.5	18.8	18.8	63.899	0	18.684	1698100000	29	12	9	8	12	12	10	8	7	6	8	7	6
290	A2AWP6;A2AWP8-3;A2AWP8-2;A2AWP8-4;A2AWP8;A2AWP4;F6S3V7;A2AWP8-5;F7BCP8	A2AWP6;A2AWP8-3;A2AWP8-2;A2AWP8-4;A2AWP8;A2AWP4;F6S3V7;A2AWP8-5	Rho guanine nucleotide exchange factor 10-like protein	Arhgef10l	tr|A2AWP6|A2AWP6_MOUSE Rho guanine nucleotide exchange factor 10-like protein OS=Mus musculus GN=Arhgef10l PE=4 SV=1;sp|A2AWP8-3|ARGAL_MOUSE Isoform 3 of Rho guanine nucleotide exchange factor 10-like protein OS=Mus musculus GN=Arhgef10l;sp|A2AWP8-2|ARGAL_	42313000	0	35902000	1504100	813710	0	690420	44923000	0	52795000	4	3	3	4.6	3.8	3.8	113.98	0.0021248	2.0057	78215000	4	3	0	1	4	1	1	3	0	1	3	0	1
291	A2AWS5;B7ZDF7;Q6P9T4;Q3UJF1;Q3U2E0;B7ZDF5;Q9Z2V6;Q80TW3;B7ZDF6;B7ZDF4	A2AWS5;B7ZDF7;Q6P9T4;Q3UJF1;Q3U2E0;B7ZDF5;Q9Z2V6;Q80TW3	Histone deacetylase;Histone deacetylase 5	Hdac5	tr|A2AWS5|A2AWS5_MOUSE Histone deacetylase 5 OS=Mus musculus GN=Hdac5 PE=4 SV=1;tr|B7ZDF7|B7ZDF7_MOUSE Histone deacetylase 5 OS=Mus musculus GN=Hdac5 PE=4 SV=1;tr|Q6P9T4|Q6P9T4_MOUSE Histone deacetylase 5 OS=Mus musculus GN=Hdac5 PE=2 SV=1;tr|Q3UJF1|Q3UJF1	4223500	28833000	31678000	1269300	82814	565350	621140	0	32358000	31569000	3	3	3	7	7	7	111.46	0.00033261	3.2048	64735000	5	1	2	2	1	2	2	1	2	2	1	2	2
292	A2AWT6;Q9DBH1;A2AWT7;A2AWT5;P25976-2;P25976;Q05DS1;E9Q4A8;G3UZW9	A2AWT6;Q9DBH1;A2AWT7;A2AWT5;P25976-2;P25976	Nucleolar transcription factor 1	Ubtf	tr|A2AWT6|A2AWT6_MOUSE Nucleolar transcription factor 1 OS=Mus musculus GN=Ubtf PE=4 SV=1;tr|Q9DBH1|Q9DBH1_MOUSE Putative uncharacterized protein OS=Mus musculus GN=Ubtf PE=2 SV=1;tr|A2AWT7|A2AWT7_MOUSE Nucleolar transcription factor 1 OS=Mus musculus GN=U	1968900000	2473100000	2961200000	164510000	43753000	54958000	65805000	2798500000	2933900000	2793300000	20	20	20	28.2	28.2	28.2	85.009	0	67.227	7403200000	74	26	23	25	16	15	18	16	15	18	16	15	18
293	A2BDN9;Q8C5K5;Q8C5K5-2	A2BDN9;Q8C5K5	Uncharacterized protein CXorf38 homolog	1810030O07Rik	tr|A2BDN9|A2BDN9_MOUSE Uncharacterized protein OS=Mus musculus GN=1810030O07Rik PE=2 SV=1;sp|Q8C5K5|CX038_MOUSE Uncharacterized protein CXorf38 homolog OS=Mus musculus PE=2 SV=1	190050000	220150000	105080000	23422000	8638400	10007000	4776600	238520000	228310000	183660000	7	7	7	20.3	20.3	20.3	36.588	0	9.4209	515280000	11	3	6	2	5	6	2	5	6	2	5	6	2
294	Q6ZQ47;A2BDX0;Q3UYC8;Q5BL11;Q5RKY4;Q9Z103;Q8BNY2	Q6ZQ47;A2BDX0;Q3UYC8;Q5BL11;Q5RKY4;Q9Z103	Activity-dependent neuroprotector homeobox protein	Adnp	tr|Q6ZQ47|Q6ZQ47_MOUSE MKIAA0784 protein (Fragment) OS=Mus musculus GN=Adnp PE=2 SV=1;tr|A2BDX0|A2BDX0_MOUSE Activity-dependent neuroprotector homeobox protein OS=Mus musculus GN=Adnp PE=1 SV=1;tr|Q3UYC8|Q3UYC8_MOUSE Putative uncharacterized protein OS=Mus	2174000000	2339700000	3529000000	111700000	30194000	32496000	49014000	3370500000	3223400000	3192900000	33	33	33	38.6	38.6	38.6	122.15	0	88.678	8042700000	113	30	41	42	24	25	29	24	25	29	24	25	29
295	A2BDX3;Q14BE0	A2BDX3	Adenylyltransferase and sulfurtransferase MOCS3;Molybdopterin-synthase adenylyltransferase;Molybdopterin-synthase sulfurtransferase	Mocs3	sp|A2BDX3|MOCS3_MOUSE Adenylyltransferase and sulfurtransferase MOCS3 OS=Mus musculus GN=Mocs3 PE=2 SV=1	661210000	586930000	451940000	58624000	22800000	20239000	15584000	621370000	781560000	772530000	6	6	6	16.5	16.5	16.5	49.374	0	15.18	1700100000	20	7	6	7	4	4	5	4	4	5	4	4	5
296	A2BDY3;Q61060	A2BDY3;Q61060	Forkhead box protein D3	Foxd3	tr|A2BDY3|A2BDY3_MOUSE Forkhead box protein D3 OS=Mus musculus GN=Foxd3 PE=4 SV=1;sp|Q61060|FOXD3_MOUSE Forkhead box protein D3 OS=Mus musculus GN=Foxd3 PE=2 SV=3	90768000	117150000	95088000	25251000	7564000	9762500	7924000	101390000	109770000	93716000	2	2	2	15.4	15.4	15.4	46.818	0	14.084	303010000	4	1	2	1	1	2	1	1	2	1	1	2	1
297	A2BE28-2;A2BE28	A2BE28-2;A2BE28	Ribosomal biogenesis protein LAS1L	Las1l	sp|A2BE28-2|LAS1L_MOUSE Isoform 2 of Ribosomal biogenesis protein LAS1L OS=Mus musculus GN=Las1l;sp|A2BE28|LAS1L_MOUSE Ribosomal biogenesis protein LAS1L OS=Mus musculus GN=Las1l PE=1 SV=1	1238900000	808370000	1123800000	73745000	28811000	18799000	26135000	1191000000	1325300000	1512600000	15	15	15	24.1	24.1	24.1	87.577	0	54.671	3171100000	54	19	20	15	12	11	11	12	11	11	12	11	11
298	A2BE91;Q5U4F6	A2BE91;Q5U4F6	WD repeat-containing protein 34	Wdr34	tr|A2BE91|A2BE91_MOUSE WD repeat domain 34 OS=Mus musculus GN=Wdr34 PE=4 SV=1;sp|Q5U4F6|WDR34_MOUSE WD repeat-containing protein 34 OS=Mus musculus GN=Wdr34 PE=2 SV=2	7209600	15462000	60915000	3799400	327710	702810	2768900	26185000	30462000	39272000	3	3	3	12.3	12.3	12.3	58.173	0.00047559	2.5684	83586000	5	1	1	3	1	1	3	1	1	3	1	1	3
299	A2BEF2;Q52KF7;A2BEE9;Q80TH1;P70175	A2BEF2;Q52KF7;A2BEE9;Q80TH1;P70175	Disks large homolog 3	Dlg3	tr|A2BEF2|A2BEF2_MOUSE Disks large homolog 3 OS=Mus musculus GN=Dlg3 PE=1 SV=1;tr|Q52KF7|Q52KF7_MOUSE Disks large homolog 3 OS=Mus musculus GN=Dlg3 PE=1 SV=1;tr|A2BEE9|A2BEE9_MOUSE Disks large homolog 3 OS=Mus musculus GN=Dlg3 PE=1 SV=1;tr|Q80TH1|Q80TH1_MO	826880000	670980000	882780000	91563000	31803000	25807000	33953000	823390000	962040000	989760000	14	12	12	34	29.9	29.9	57.905	0	43.956	2380600000	38	13	14	11	12	11	10	10	9	8	10	9	8
300	A2BFF7;Q3TPJ8;O88487;A2BFF8;D6Q0F7;A2BFF9;D6Q0F6;D6Q0F5;A2BFF5;Q3UDA2	A2BFF7;Q3TPJ8;O88487;A2BFF8;D6Q0F7;A2BFF9;D6Q0F6;D6Q0F5;A2BFF5;Q3UDA2	Cytoplasmic dynein 1 intermediate chain 2	Dync1i2	tr|A2BFF7|A2BFF7_MOUSE Dynein cytoplasmic 1 intermediate chain 2 OS=Mus musculus GN=Dync1i2 PE=2 SV=1;tr|Q3TPJ8|Q3TPJ8_MOUSE Cytoplasmic dynein 1 intermediate chain 2 OS=Mus musculus GN=Dync1i2 PE=1 SV=1;sp|O88487|DC1I2_MOUSE Cytoplasmic dynein 1 intermedi	2389700000	3343800000	2846700000	373050000	103900000	145380000	123770000	2870100000	3226700000	3163800000	19	19	19	52.3	52.3	52.3	68.393	0	94.372	8580100000	70	17	27	26	14	17	16	14	17	16	14	17	16
301	Q8C434;Q6GSP7;A2BG76;I7HIP8;A2BG75;A2BG77;P97863-3;P97863-2;P97863;Q3UFE1;Q8BN68;A2ADI3;J3JS90	Q8C434;Q6GSP7;A2BG76;I7HIP8;A2BG75;A2BG77;P97863-3;P97863-2;P97863;Q3UFE1;Q8BN68	Nuclear factor 1;Nuclear factor 1 B-type	Nfib	tr|Q8C434|Q8C434_MOUSE Nuclear factor 1 OS=Mus musculus GN=Nfib PE=2 SV=1;tr|Q6GSP7|Q6GSP7_MOUSE Nuclear factor 1 OS=Mus musculus GN=Nfib PE=2 SV=1;tr|A2BG76|A2BG76_MOUSE Nuclear factor 1 OS=Mus musculus GN=Nfib PE=1 SV=1;tr|I7HIP8|I7HIP8_MOUSE Nuclear fac	927190000	611250000	846750000	119260000	46360000	30562000	42337000	1018700000	826330000	924900000	7	5	5	26	21	21	47.53	0	17.03	2385200000	29	10	9	10	7	7	7	5	5	5	5	5	5
302	A2BGI8;Q4G0C5;Q3UWH9;Q9D868-2;Q3UY37;A2BGI9;Q9D868	A2BGI8;Q4G0C5;Q3UWH9;Q9D868-2;Q3UY37;A2BGI9;Q9D868	Peptidyl-prolyl cis-trans isomerase;Peptidyl-prolyl cis-trans isomerase H	Ppih	tr|A2BGI8|A2BGI8_MOUSE Peptidyl-prolyl cis-trans isomerase (Fragment) OS=Mus musculus GN=Ppih PE=3 SV=1;tr|Q4G0C5|Q4G0C5_MOUSE Peptidyl-prolyl cis-trans isomerase OS=Mus musculus GN=Ppih PE=2 SV=1;tr|Q3UWH9|Q3UWH9_MOUSE Peptidyl-prolyl cis-trans isomerase	793220000	823820000	757270000	169590000	56659000	58844000	54091000	894220000	979230000	876050000	9	9	9	69	69	69	17.233	0	20.277	2374300000	27	7	11	9	8	8	7	8	8	7	8	8	7
303	A2BGN7;Q9D8X0	A2BGN7;Q9D8X0	Protein MANBAL	Manbal	tr|A2BGN7|A2BGN7_MOUSE Protein MANBAL OS=Mus musculus GN=Manbal PE=4 SV=1;sp|Q9D8X0|MANBL_MOUSE Protein MANBAL OS=Mus musculus GN=Manbal PE=2 SV=2	149410000	296450000	240080000	137190000	29883000	59290000	48015000	137090000	318630000	236280000	2	2	2	40	40	40	9.3679	0	10.638	685940000	11	4	4	3	2	2	2	2	2	2	2	2	2
304	A2BI12	A2BI12		Psip1	tr|A2BI12|A2BI12_MOUSE PC4 and SFRS1-interacting protein OS=Mus musculus GN=Psip1 PE=1 SV=1	174760000	79688000	91680000	18217000	9197700	4194100	4825300	140900000	98109000	109060000	14	1	1	46.8	4	4	36.968	0.00047794	2.6371	346130000	5	2	1	2	13	13	14	1	1	1	1	1	1
305	Q3UR75;A2BIE1	Q3UR75;A2BIE1		Qser1	tr|Q3UR75|Q3UR75_MOUSE Putative uncharacterized protein (Fragment) OS=Mus musculus GN=Qser1 PE=2 SV=1;tr|A2BIE1|A2BIE1_MOUSE Protein Qser1 OS=Mus musculus GN=Qser1 PE=4 SV=2	39422000	23368000	21653000	1362000	635850	376900	349240	31718000	17154000	70295000	8	8	8	10.1	10.1	10.1	132.88	0	5.4646	84443000	10	4	2	4	4	4	3	4	4	3	4	4	3
306	F6QYT9;A2CG49-2;A2CG49;A2CG49-7;A2CG49-9;A2CG49-8;D3Z560;D3Z559;B1B1A7;A2CG49-5;D3Z534;D3Z532;D3Z535;D3Z4R2;A2CG49-4;A2CG49-6	F6QYT9;A2CG49-2;A2CG49;A2CG49-7;A2CG49-9;A2CG49-8;D3Z560;D3Z559;B1B1A7;A2CG49-5	Kalirin	Kalrn	tr|F6QYT9|F6QYT9_MOUSE Kalirin (Fragment) OS=Mus musculus GN=Kalrn PE=1 SV=1;sp|A2CG49-2|KALRN_MOUSE Isoform 2 of Kalirin OS=Mus musculus GN=Kalrn;sp|A2CG49|KALRN_MOUSE Kalirin OS=Mus musculus GN=Kalrn PE=1 SV=1;sp|A2CG49-7|KALRN_MOUSE Isoform 7 of Kalirin	0	0	28430000	198810	0	0	198810	0	0	40990000	7	2	1	3.1	1.1	0.5	270.65	0.00033036	3.1086	28430000	1	0	0	1	4	2	5	0	0	2	0	0	1
307	Q8BYB0;Q8BXV6;A2CG63-2;A2CG63	Q8BYB0;Q8BXV6;A2CG63-2;A2CG63	AT-rich interactive domain-containing protein 4B	Arid4b	tr|Q8BYB0|Q8BYB0_MOUSE Putative uncharacterized protein (Fragment) OS=Mus musculus GN=Arid4b PE=2 SV=1;tr|Q8BXV6|Q8BXV6_MOUSE Putative uncharacterized protein (Fragment) OS=Mus musculus GN=Arid4b PE=2 SV=1;sp|A2CG63-2|ARI4B_MOUSE Isoform 2 of AT-rich inter	12557000	0	11459000	2401600	1255700	0	1145900	15381000	0	13277000	1	1	1	6.7	6.7	6.7	25.604	0.00047763	2.628	24016000	2	1	0	1	1	0	1	1	0	1	1	0	1
308	A2RRI8;Q8CF93;Q8CF93-2;B1AY79	A2RRI8;Q8CF93;Q8CF93-2	Polypeptide N-acetylgalactosaminyltransferase;Polypeptide N-acetylgalactosaminyltransferase 13	Galnt13	tr|A2RRI8|A2RRI8_MOUSE Galnt13 protein OS=Mus musculus GN=Galnt13 PE=2 SV=1;sp|Q8CF93|GLT13_MOUSE Polypeptide N-acetylgalactosaminyltransferase 13 OS=Mus musculus GN=Galnt13 PE=2 SV=1;sp|Q8CF93-2|GLT13_MOUSE Isoform 2 of Polypeptide N-acetylgalactosaminylt	0	0	0	0	0	0	0	0	0	0	3	1	1	7	2.9	2.9	63.982	1	-2	0	0	0	0	0	3	2	2	1	0	0	1	0	0
309	A2RRJ6;Q80SY4;F6ZBL2;Q3TSS1;F6YFW9;Q3UTL6;REV__Q6PG62;REV__Q8BV52;REV__G5E8B1;REV__Q64512	A2RRJ6;Q80SY4;F6ZBL2	E3 ubiquitin-protein ligase MIB1	Mib1	tr|A2RRJ6|A2RRJ6_MOUSE Mib1 protein OS=Mus musculus GN=Mib1 PE=2 SV=1;sp|Q80SY4|MIB1_MOUSE E3 ubiquitin-protein ligase MIB1 OS=Mus musculus GN=Mib1 PE=1 SV=1;tr|F6ZBL2|F6ZBL2_MOUSE E3 ubiquitin-protein ligase MIB1 (Fragment) OS=Mus musculus GN=Mib1 PE=4 SV	222400000	198800000	386320000	14167000	3901800	3487800	6777600	285360000	297240000	304080000	11	11	10	14.4	14.4	13.6	110.09	0	20.474	807530000	29	10	10	9	8	9	7	8	9	7	8	8	6
310	A2RRK3;O54988-2;O54988;Q3TRK8;G3X8V6;B9EHD2;O70458-2;O70458	A2RRK3;O54988-2;O54988	STE20-like serine/threonine-protein kinase	Slk	tr|A2RRK3|A2RRK3_MOUSE Slk protein OS=Mus musculus GN=Slk PE=2 SV=1;sp|O54988-2|SLK_MOUSE Isoform 2 of STE20-like serine/threonine-protein kinase OS=Mus musculus GN=Slk;sp|O54988|SLK_MOUSE STE20-like serine/threonine-protein kinase OS=Mus musculus GN=Slk P	2662100000	2676000000	3042100000	119720000	38030000	38229000	43458000	2790500000	3434300000	2955100000	37	37	36	45.4	45.4	44.7	137.71	0	145	8380100000	114	41	33	40	29	28	29	29	28	29	28	27	28
311	A2RRR0;A3KMG9;Z4YJC9;Q6T3U4	A2RRR0;A3KMG9;Z4YJC9;Q6T3U4	Niemann-Pick C1-like protein 1	Npc1l1	tr|A2RRR0|A2RRR0_MOUSE Npc1l1 protein OS=Mus musculus GN=Npc1l1 PE=2 SV=1;tr|A3KMG9|A3KMG9_MOUSE Npc1l1 protein (Fragment) OS=Mus musculus GN=Npc1l1 PE=2 SV=1;tr|Z4YJC9|Z4YJC9_MOUSE NPC1-like 1 OS=Mus musculus GN=Npc1l1 PE=4 SV=1;sp|Q6T3U4|NPCL1_MOUSE Niem	0	89733000	191550000	10046000	0	3204700	6840900	0	131920000	147340000	1	1	1	1.1	1.1	1.1	79.971	0.0034135	1.5974	281280000	3	0	1	2	0	1	1	0	1	1	0	1	1
312	A2RS22;Q9WUM3;D3YUG6	A2RS22;Q9WUM3	Coronin;Coronin-1B	Coro1b	tr|A2RS22|A2RS22_MOUSE Coronin OS=Mus musculus GN=Coro1b PE=2 SV=1;sp|Q9WUM3|COR1B_MOUSE Coronin-1B OS=Mus musculus GN=Coro1b PE=1 SV=1	5413400000	6561000000	6148000000	787930000	235360000	285260000	267300000	7559200000	7093100000	7421800000	15	15	15	41.3	41.3	41.3	53.912	0	132.14	18122000000	99	28	35	36	12	14	13	12	14	13	12	14	13
313	A2RS23;Q11136;G3UXC5	A2RS23;Q11136	Xaa-Pro dipeptidase	Pepd	tr|A2RS23|A2RS23_MOUSE Peptidase D OS=Mus musculus GN=Pepd PE=2 SV=1;sp|Q11136|PEPD_MOUSE Xaa-Pro dipeptidase OS=Mus musculus GN=Pepd PE=2 SV=3	2086500000	1634700000	1823700000	198030000	74519000	58383000	65131000	2456600000	2511300000	2586300000	17	17	17	46.9	46.9	46.9	55.028	0	76.72	5544900000	56	23	16	17	16	12	11	16	12	11	16	12	11
314	Q3USI1;Q3TVS7;O88185;A2RS43;E9Q2S0;Q2TJI4;Q2TJI5;Q2TJI6;Q8CA35	Q3USI1;Q3TVS7;O88185;A2RS43;E9Q2S0		Pcdh7	tr|Q3USI1|Q3USI1_MOUSE Putative uncharacterized protein OS=Mus musculus GN=Pcdh7 PE=2 SV=1;tr|Q3TVS7|Q3TVS7_MOUSE Putative uncharacterized protein OS=Mus musculus GN=Pcdh7 PE=2 SV=1;tr|O88185|O88185_MOUSE BH-protocadherin-a OS=Mus musculus GN=Pcdh7 PE=2 SV	52266000	65688000	86592000	4010700	1024800	1288000	1697900	91234000	96731000	74588000	6	6	6	10	10	10	116.23	0	10.463	204550000	11	3	4	4	4	4	4	4	4	4	4	4	4
315	Q8C1Z9;F6V6T4;A2RS53;Q9R0Q3;Q3THL1;Q3U9H7;Q8BPI2	Q8C1Z9;F6V6T4;A2RS53;Q9R0Q3;Q3THL1;Q3U9H7;Q8BPI2	Transmembrane emp24 domain-containing protein 2	Tmed2	tr|Q8C1Z9|Q8C1Z9_MOUSE Putative uncharacterized protein OS=Mus musculus PE=2 SV=1;tr|F6V6T4|F6V6T4_MOUSE Transmembrane emp24 domain-containing protein 2 (Fragment) OS=Mus musculus GN=Tmed2 PE=3 SV=1;tr|A2RS53|A2RS53_MOUSE Transmembrane emp24 domain traffic	3897300000	3411000000	3937500000	1124600000	389730000	341100000	393750000	4240600000	3048100000	3993000000	6	6	6	43.4	43.4	43.4	18.262	0	61.153	11246000000	70	25	25	20	5	6	5	5	6	5	5	6	5
316	A2RS58;P47941;Q8R5B8	A2RS58;P47941	Crk-like protein	Crkl	tr|A2RS58|A2RS58_MOUSE V-crk sarcoma virus CT10 oncogene homolog (Avian)-like OS=Mus musculus GN=Crkl PE=2 SV=1;sp|P47941|CRKL_MOUSE Crk-like protein OS=Mus musculus GN=Crkl PE=1 SV=2	801200000	924600000	893990000	137880000	42168000	48663000	47052000	1103700000	1106400000	1170600000	9	9	9	42.9	42.9	42.9	33.83	0	32.671	2619800000	40	12	15	13	7	8	8	7	8	8	7	8	8
317	A2RS68;Q62376;Q9CR32;Q6ZWP0;Q62376-2;Q7TT81;Q99LY5	A2RS68;Q62376;Q9CR32;Q6ZWP0;Q62376-2;Q7TT81	U1 small nuclear ribonucleoprotein 70 kDa	Snrnp70	tr|A2RS68|A2RS68_MOUSE Small nuclear ribonucleoprotein 70 (U1) OS=Mus musculus GN=Snrnp70 PE=2 SV=1;sp|Q62376|RU17_MOUSE U1 small nuclear ribonucleoprotein 70 kDa OS=Mus musculus GN=Snrnp70 PE=1 SV=2;tr|Q9CR32|Q9CR32_MOUSE Putative uncharacterized protein	6425800000	5737900000	5464300000	927790000	338200000	301990000	287600000	7138800000	6011500000	5967900000	17	17	17	44.4	44.4	44.4	51.991	0	38.777	17628000000	83	28	30	25	13	15	14	13	15	14	13	15	14
318	Q8VCE7;A2RS96;Q9CXE7;Q3TW73;E9PXY3;Q3U9T7;D3Z615;Q8C5H9;Q3V440;E9Q2J2;Q8C954	Q8VCE7;A2RS96;Q9CXE7;Q3TW73;E9PXY3;Q3U9T7;D3Z615;Q8C5H9;Q3V440;E9Q2J2	Transmembrane emp24 domain-containing protein 5	Tmed5	tr|Q8VCE7|Q8VCE7_MOUSE Transmembrane emp24 protein transport domain containing 5 OS=Mus musculus GN=Tmed5 PE=2 SV=1;tr|A2RS96|A2RS96_MOUSE Transmembrane emp24 protein transport domain containing 5 OS=Mus musculus GN=Tmed5 PE=2 SV=1;sp|Q9CXE7|TMED5_MOUSE Tr	542990000	530700000	611150000	129600000	41768000	40823000	47011000	657420000	808100000	750940000	4	4	4	17.5	17.5	17.5	26.186	0	8.8985	1684800000	15	4	6	5	2	3	4	2	3	4	2	3	4
319	A2RSB1;B7ZNL2;Q8C1W9;Q78ZA7	A2RSB1;B7ZNL2;Q8C1W9;Q78ZA7	Nucleosome assembly protein 1-like 4	Nap1l4	tr|A2RSB1|A2RSB1_MOUSE Nucleosome assembly protein 1-like 4 OS=Mus musculus GN=Nap1l4 PE=2 SV=1;tr|B7ZNL2|B7ZNL2_MOUSE Nap1l4 protein OS=Mus musculus GN=Nap1l4 PE=2 SV=1;tr|Q8C1W9|Q8C1W9_MOUSE Putative uncharacterized protein OS=Mus musculus GN=Nap1l4 PE=2	5418100000	5784300000	5898100000	950030000	301010000	321350000	327670000	6095900000	7170700000	6873400000	14	12	12	55.2	52.5	52.5	42.679	0	78.865	17101000000	103	27	37	39	12	14	13	10	12	11	10	12	11
320	A2RSB9;Q9D132	A2RSB9;Q9D132	Tetraspanin;Uroplakin-1a	Upk1a	tr|A2RSB9|A2RSB9_MOUSE Uroplakin 1A OS=Mus musculus GN=Upk1a PE=2 SV=1;sp|Q9D132|UPK1A_MOUSE Uroplakin-1a OS=Mus musculus GN=Upk1a PE=1 SV=1	48830000	0	112540000	17930000	5425600	0	12505000	74641000	0	152750000	1	1	1	3.9	3.9	3.9	28.853	1	-2	161370000	2	1	0	1	1	0	1	1	0	1	1	0	1
321	A2RSE4;P63147	A2RSE4;P63147	Ubiquitin-conjugating enzyme E2 B	Ube2b	tr|A2RSE4|A2RSE4_MOUSE Ubiquitin-conjugating enzyme E2B, RAD6 homology (S. cerevisiae) OS=Mus musculus GN=Ube2b PE=2 SV=1;sp|P63147|UBE2B_MOUSE Ubiquitin-conjugating enzyme E2 B OS=Mus musculus GN=Ube2b PE=1 SV=1	64628000	21037000	54496000	35040000	16157000	5259200	13624000	82435000	69469000	57713000	1	1	1	11.2	11.2	11.2	17.312	0.00032268	2.8123	140160000	2	0	1	1	1	1	1	1	1	1	1	1	1
322	Q3UGT3;A2RSF1;Q8K4M5;Q8VI86;G8JL54;F7BCN0;F7BZY0	Q3UGT3;A2RSF1;Q8K4M5;Q8VI86;G8JL54;F7BCN0;F7BZY0	COMM domain-containing protein 1	Commd1;Gm28048	tr|Q3UGT3|Q3UGT3_MOUSE Putative uncharacterized protein OS=Mus musculus GN=Commd1 PE=2 SV=1;tr|A2RSF1|A2RSF1_MOUSE COMM domain containing 1 OS=Mus musculus GN=Commd1 PE=2 SV=1;sp|Q8K4M5|COMD1_MOUSE COMM domain-containing protein 1 OS=Mus musculus GN=Commd1	225900000	235360000	192250000	108920000	37650000	39227000	32042000	306680000	245190000	221360000	4	4	4	34.1	34.1	34.1	15.35	0	11.383	653520000	11	3	3	5	3	4	4	3	4	4	3	4	4
323	A6XDB1;A6XDA7;A6XDB0;A6XDA6;B1PSD9;B2KF57;B2KF84;A2RSH1;F6QFD1;E9PVU7;Q01063-3;Q01063-2;Q01063	A6XDB1;A6XDA7;A6XDB0;A6XDA6;B1PSD9;B2KF57;B2KF84;A2RSH1;F6QFD1;E9PVU7;Q01063-3;Q01063-2;Q01063	cAMP-specific 3,5-cyclic phosphodiesterase 4D	Pde4d	tr|A6XDB1|A6XDB1_MOUSE cAMP-specific 3,5-cyclic phosphodiesterase 4D OS=Mus musculus GN=Pde4d PE=2 SV=1;tr|A6XDA7|A6XDA7_MOUSE cAMP-specific phosphodiesterase 4D isoform 2 variant 1 OS=Mus musculus GN=Pde4d PE=2 SV=1;tr|A6XDB0|A6XDB0_MOUSE cAMP-specific	0	30921000	41197000	3004900	0	1288400	1716500	0	45718000	55558000	1	1	1	3	3	3	57.577	0.00033239	3.199	72117000	2	0	1	1	0	1	1	0	1	1	0	1	1
324	Q3UVQ0;A2RSH4;Q69ZS6	Q3UVQ0;A2RSH4;Q69ZS6	Synaptic vesicle glycoprotein 2C	Sv2c	tr|Q3UVQ0|Q3UVQ0_MOUSE Putative uncharacterized protein (Fragment) OS=Mus musculus GN=Sv2c PE=2 SV=1;tr|A2RSH4|A2RSH4_MOUSE Sv2c protein OS=Mus musculus GN=Sv2c PE=2 SV=1;sp|Q69ZS6|SV2C_MOUSE Synaptic vesicle glycoprotein 2C OS=Mus musculus GN=Sv2c PE=1 SV	106790000	0	0	7119300	7119300	0	0	109950000	0	0	1	1	1	2.2	2.2	2.2	41.565	1	-2	106790000	1	1	0	0	1	0	0	1	0	0	1	0	0
325	A2RSJ4;Q8C318;Q922V6;Q9D574	A2RSJ4	UHRF1-binding protein 1-like	Uhrf1bp1l	sp|A2RSJ4|UH1BL_MOUSE UHRF1-binding protein 1-like OS=Mus musculus GN=Uhrf1bp1l PE=1 SV=2	178110000	357730000	462300000	10733000	1915100	3846600	4971000	322180000	354480000	397580000	12	12	11	13.2	13.2	12.7	161.94	0	21.158	998140000	26	8	10	8	8	8	7	8	8	7	7	7	7
326	A2RSL2;Q8BMD7-2;Q8BMD7	A2RSL2;Q8BMD7-2;Q8BMD7	MORC family CW-type zinc finger protein 4	Morc4	tr|A2RSL2|A2RSL2_MOUSE Microrchidia 4 OS=Mus musculus GN=Morc4 PE=2 SV=1;sp|Q8BMD7-2|MORC4_MOUSE Isoform 2 of MORC family CW-type zinc finger protein 4 OS=Mus musculus GN=Morc4;sp|Q8BMD7|MORC4_MOUSE MORC family CW-type zinc finger protein 4 OS=Mus musculus	0	0	0	0	0	0	0	0	0	0	1	1	1	0.8	0.8	0.8	100.6	1	-2	0	0	0	0	0	1	0	1	1	0	1	1	0	1
327	A2RSS6;Q64191;B7ZNK6	A2RSS6;Q64191;B7ZNK6	N(4)-(beta-N-acetylglucosaminyl)-L-asparaginase;Glycosylasparaginase alpha chain;Glycosylasparaginase beta chain	Aga	tr|A2RSS6|A2RSS6_MOUSE Aspartylglucosaminidase OS=Mus musculus GN=Aga PE=2 SV=1;sp|Q64191|ASPG_MOUSE N(4)-(beta-N-acetylglucosaminyl)-L-asparaginase OS=Mus musculus GN=Aga PE=2 SV=1;tr|B7ZNK6|B7ZNK6_MOUSE Aga protein OS=Mus musculus GN=Aga PE=2 SV=1	551200000	439780000	421630000	78478000	30622000	24432000	23424000	582180000	559620000	547560000	7	7	7	26.9	26.9	26.9	37.022	0	60.531	1412600000	22	8	7	7	6	5	5	6	5	5	6	5	5
328	A2RSV8;P19783;M0QWX7;D6RG40	A2RSV8;P19783;M0QWX7	Cytochrome c oxidase subunit 4 isoform 1, mitochondrial	Cox4i1	tr|A2RSV8|A2RSV8_MOUSE Cytochrome c oxidase subunit IV isoform 1 OS=Mus musculus GN=Cox4i1 PE=2 SV=1;sp|P19783|COX41_MOUSE Cytochrome c oxidase subunit 4 isoform 1, mitochondrial OS=Mus musculus GN=Cox4i1 PE=1 SV=2;tr|M0QWX7|M0QWX7_MOUSE Cytochrome c oxida	5047100000	4351900000	4985800000	1198700000	420590000	362660000	415480000	6593100000	5357300000	5348100000	10	10	10	53.8	53.8	53.8	19.53	0	38.638	14385000000	81	28	27	26	9	9	9	9	9	9	9	9	9
329	A2RSW6;Q8CFA2	A2RSW6;Q8CFA2	Aminomethyltransferase;Aminomethyltransferase, mitochondrial	Amt	tr|A2RSW6|A2RSW6_MOUSE Aminomethyltransferase OS=Mus musculus GN=Amt PE=2 SV=1;sp|Q8CFA2|GCST_MOUSE Aminomethyltransferase, mitochondrial OS=Mus musculus GN=Amt PE=1 SV=1	1641300000	1270900000	1642100000	207010000	74603000	57768000	74640000	1780800000	1841100000	2036600000	13	13	13	37	37	37	44.008	0	81.698	4554200000	55	20	17	18	12	9	9	12	9	9	12	9	9
330	Q8CDQ3;A2RSX4	Q8CDQ3;A2RSX4		4933433C11Rik	tr|Q8CDQ3|Q8CDQ3_MOUSE Protein 4933433C11Rik OS=Mus musculus GN=4933433C11Rik PE=2 SV=1;tr|A2RSX4|A2RSX4_MOUSE 4933433C11Rik protein OS=Mus musculus GN=4933433C11Rik PE=2 SV=1	7259600000	10198000000	10336000000	2138000000	558430000	784480000	795090000	9701700000	13167000000	13117000000	1	1	1	3.6	3.6	3.6	28.338	1	-2	27794000000	10	3	5	2	1	1	1	1	1	1	1	1	1
331	A2RSX7;G3UW53;E0CZH0;A2RSX7-2	A2RSX7;G3UW53	tRNA wybutosine-synthesizing protein 5	Tyw5	sp|A2RSX7|TYW5_MOUSE tRNA wybutosine-synthesizing protein 5 OS=Mus musculus GN=Tyw5 PE=2 SV=2;tr|G3UW53|G3UW53_MOUSE RIKEN cDNA 1110034B05, isoform CRA_c (Fragment) OS=Mus musculus GN=Tyw5 PE=4 SV=1	0	53646000	95440000	7454300	0	2682300	4772000	0	72295000	105860000	4	4	4	18.4	18.4	18.4	36.632	0.00063002	2.4962	149090000	5	0	3	2	0	3	2	0	3	2	0	3	2
332	A2RSX9;E9Q3G5;Q3TVE1;E9QAY5	A2RSX9;E9Q3G5;Q3TVE1;E9QAY5		Arfip1	tr|A2RSX9|A2RSX9_MOUSE Arfip1 protein OS=Mus musculus GN=Arfip1 PE=2 SV=1;tr|E9Q3G5|E9Q3G5_MOUSE Protein Arfip1 OS=Mus musculus GN=Arfip1 PE=4 SV=1;tr|Q3TVE1|Q3TVE1_MOUSE Putative uncharacterized protein (Fragment) OS=Mus musculus GN=Arfip1 PE=2 SV=1;tr|E9	358790000	0	0	14352000	14352000	0	0	358790000	0	0	13	1	1	47.2	4.1	4.1	38.416	1	-2	358790000	0	0	0	0	13	10	10	1	0	0	1	0	0
333	A2RSY1-2;A2RSY1;A2RSY1-3	A2RSY1-2;A2RSY1;A2RSY1-3	KAT8 regulatory NSL complex subunit 3	Kansl3	sp|A2RSY1-2|KANL3_MOUSE Isoform 2 of KAT8 regulatory NSL complex subunit 3 OS=Mus musculus GN=Kansl3;sp|A2RSY1|KANL3_MOUSE KAT8 regulatory NSL complex subunit 3 OS=Mus musculus GN=Kansl3 PE=2 SV=1;sp|A2RSY1-3|KANL3_MOUSE Isoform 3 of KAT8 regulatory NSL co	40668000	44526000	31950000	2492400	865280	947360	679790	47224000	60265000	51323000	4	4	4	9.1	9.1	9.1	93.278	0.00032113	2.7494	117140000	7	1	4	2	2	4	1	2	4	1	2	4	1
334	A2RSY6;A2RSY6-2;A2RSY6-3	A2RSY6;A2RSY6-2	TRMT1-like protein	Trmt1l	sp|A2RSY6|TRM1L_MOUSE TRMT1-like protein OS=Mus musculus GN=Trmt1l PE=2 SV=1;sp|A2RSY6-2|TRM1L_MOUSE Isoform 2 of TRMT1-like protein OS=Mus musculus GN=Trmt1l	998970000	920470000	1104500000	64338000	21255000	19584000	23499000	1215000000	1292200000	1242700000	18	18	18	35.2	35.2	35.2	80.86	0	70.446	3023900000	48	17	14	17	14	11	14	14	11	14	14	11	14
335	A2RT05;P27545	A2RT05;P27545	Ceramide synthase 1	Lass1;Cers1	tr|A2RT05|A2RT05_MOUSE LAG1 homolog, ceramide synthase 1 OS=Mus musculus GN=Lass1 PE=2 SV=1;sp|P27545|CERS1_MOUSE Ceramide synthase 1 OS=Mus musculus GN=Cers1 PE=1 SV=1	28906000	24037000	11223000	4277700	1927100	1602500	748190	30749000	38857000	27479000	2	2	2	10.6	10.6	10.6	40.1	0.00017164	3.824	64166000	5	2	2	1	2	2	1	2	2	1	2	2	1
336	A2RT28;Q499X9	A2RT28;Q499X9	Methionine--tRNA ligase, mitochondrial	Mars2	tr|A2RT28|A2RT28_MOUSE Methionine-tRNA synthetase 2 (Mitochondrial) OS=Mus musculus GN=Mars2 PE=2 SV=1;sp|Q499X9|SYMM_MOUSE Methionine--tRNA ligase, mitochondrial OS=Mus musculus GN=Mars2 PE=2 SV=2	229050000	441860000	248030000	31688000	7898200	15237000	8552900	378320000	352600000	428860000	14	14	14	37	37	37	65.804	0	21.387	918940000	30	10	11	9	8	9	7	8	9	7	8	9	7
337	A2RT57;Q9CQC8;Q9CQC8-2	A2RT57;Q9CQC8;Q9CQC8-2	Maspardin	Spg21	tr|A2RT57|A2RT57_MOUSE Spastic paraplegia 21 homolog (Human) OS=Mus musculus GN=Spg21 PE=2 SV=1;sp|Q9CQC8|SPG21_MOUSE Maspardin OS=Mus musculus GN=Spg21 PE=1 SV=1;sp|Q9CQC8-2|SPG21_MOUSE Isoform 2 of Maspardin OS=Mus musculus GN=Spg21	544130000	537280000	540470000	90105000	30230000	29849000	30026000	476140000	689910000	606280000	7	7	7	28.9	28.9	28.9	34.952	0	31.29	1621900000	23	10	7	6	6	4	4	6	4	4	6	4	4
338	A2RTC8;Q3KNM2;F6W8T3	A2RTC8;Q3KNM2	E3 ubiquitin-protein ligase MARCH5	38412	tr|A2RTC8|A2RTC8_MOUSE MCG13921, isoform CRA_b OS=Mus musculus GN=March5 PE=2 SV=1;sp|Q3KNM2|MARH5_MOUSE E3 ubiquitin-protein ligase MARCH5 OS=Mus musculus GN=March5 PE=2 SV=1	563080000	682570000	622580000	109900000	33122000	40151000	36622000	509220000	845990000	814650000	6	6	6	27.7	27.7	27.7	31.231	0	12.318	1868200000	18	8	4	6	6	4	5	6	4	5	6	4	5
339	A2RTH5;Q78K29;Q9D963;Q6PDZ4	A2RTH5		Lcmt1	tr|A2RTH5|A2RTH5_MOUSE Leucine carboxyl methyltransferase 1 OS=Mus musculus GN=Lcmt1 PE=2 SV=1	268050000	416650000	399560000	51632000	12764000	19841000	19027000	417160000	495160000	374700000	7	7	7	28	28	28	38.192	0	19.897	1084300000	18	4	7	7	5	6	6	5	6	6	5	6	6
340	A2RTI3;O89017;Q3UE99	A2RTI3;O89017	Legumain	Lgmn	tr|A2RTI3|A2RTI3_MOUSE Legumain OS=Mus musculus GN=Lgmn PE=2 SV=1;sp|O89017|LGMN_MOUSE Legumain OS=Mus musculus GN=Lgmn PE=1 SV=1	628040000	516760000	400190000	70226000	28547000	23489000	18190000	691670000	755370000	536440000	5	5	5	17.5	17.5	17.5	49.372	0	31.622	1545000000	18	6	7	5	3	5	3	3	5	3	3	5	3
341	B7ZNU2;S4R265;S4R2L4;A2RTL5;S4R1M5;Q8BI46;Q9CSJ3;S4R2G2;Q922F2	B7ZNU2;S4R265;S4R2L4;A2RTL5;S4R1M5	Arginine/serine-rich coiled-coil protein 2	Rsrc2	tr|B7ZNU2|B7ZNU2_MOUSE Rsrc2 protein OS=Mus musculus GN=Rsrc2 PE=2 SV=1;tr|S4R265|S4R265_MOUSE Arginine/serine-rich coiled-coil protein 2 OS=Mus musculus GN=Rsrc2 PE=4 SV=1;tr|S4R2L4|S4R2L4_MOUSE Arginine/serine-rich coiled-coil protein 2 OS=Mus musculus G	141980000	353800000	589610000	67837000	8873500	22113000	36851000	438470000	345060000	441050000	5	5	5	18.4	18.4	18.4	43.805	0	13.659	1085400000	18	4	7	7	3	5	5	3	5	5	3	5	5
342	A2RTT4;P61089	A2RTT4;P61089	Ubiquitin-conjugating enzyme E2 N	Ube2n	tr|A2RTT4|A2RTT4_MOUSE MCG4297 OS=Mus musculus GN=Ube2n PE=2 SV=1;sp|P61089|UBE2N_MOUSE Ubiquitin-conjugating enzyme E2 N OS=Mus musculus GN=Ube2n PE=1 SV=1	9430100000	8095200000	9447400000	2452100000	857280000	735920000	858850000	11029000000	10892000000	10111000000	9	9	8	75	75	70.4	17.138	0	28.482	26973000000	71	23	23	25	7	6	8	7	6	8	6	5	7
343	B1AWL2;A2SW42;B1AWL4;B1AWL5;Q69ZA0;Q8CD61;Q4FZD0	B1AWL2;A2SW42;B1AWL4;B1AWL5		Zfp462	tr|B1AWL2|B1AWL2_MOUSE Protein Zfp462 OS=Mus musculus GN=Zfp462 PE=4 SV=1;tr|A2SW42|A2SW42_MOUSE Zinc finger protein 462 OS=Mus musculus GN=Zfp462 PE=2 SV=1;tr|B1AWL4|B1AWL4_MOUSE Protein Zfp462 OS=Mus musculus GN=Zfp462 PE=4 SV=1;tr|B1AWL5|B1AWL5_MOUSE Pr	333410000	548670000	186490000	8904800	2778400	4572300	1554100	373610000	572710000	368580000	13	13	13	8.5	8.5	8.5	282.71	0	11.881	1068600000	23	9	6	8	8	7	7	8	7	7	8	7	7
344	A2VCT7;A8E636;Q6ZQ11;A8E635	A2VCT7;A8E636;Q6ZQ11;A8E635	Chondroitin sulfate synthase 1	Chsy1	tr|A2VCT7|A2VCT7_MOUSE Chsy1 protein (Fragment) OS=Mus musculus GN=Chsy1 PE=2 SV=1;tr|A8E636|A8E636_MOUSE Chsy1 protein (Fragment) OS=Mus musculus GN=Chsy1 PE=2 SV=1;sp|Q6ZQ11|CHSS1_MOUSE Chondroitin sulfate synthase 1 OS=Mus musculus GN=Chsy1 PE=2 SV=2;tr	44648000	0	21908000	1279900	858620	0	421320	50393000	0	37926000	4	4	4	6.4	6.4	6.4	85.757	0.00047672	2.6027	66556000	6	4	0	2	4	0	2	4	0	2	4	0	2
345	A2VDG1;Q8CJG1;Q8CGU0;Q8BJP2;H3BJ70;Q8CJF8-2;Q8BTF2;H3BL59;A3KFX7;A3KFX6	A2VDG1;Q8CJG1;Q8CGU0;Q8BJP2;H3BJ70	Protein argonaute;Protein argonaute-1	Ago1	tr|A2VDG1|A2VDG1_MOUSE Protein argonaute (Fragment) OS=Mus musculus GN=Ago1 PE=2 SV=1;sp|Q8CJG1|AGO1_MOUSE Protein argonaute-1 OS=Mus musculus GN=Ago1 PE=1 SV=2;tr|Q8CGU0|Q8CGU0_MOUSE Protein argonaute (Fragment) OS=Mus musculus GN=Ago1 PE=3 SV=1;tr|Q8BJP2	388700000	269560000	216150000	15614000	6941100	4813500	3859800	367310000	316740000	364080000	21	14	9	35.6	25.8	17.8	96.953	0	20.997	874410000	20	8	7	5	17	14	13	10	7	6	7	4	3
346	A2VDH4;Q3UJQ1;Q8CHK4-2;Q8CHK4;Q3YFI9;Q8CHK4-4;Q8CHK4-3	A2VDH4;Q3UJQ1;Q8CHK4-2;Q8CHK4;Q3YFI9;Q8CHK4-4;Q8CHK4-3	Histone acetyltransferase;Histone acetyltransferase KAT5	Kat5	tr|A2VDH4|A2VDH4_MOUSE Kat5 protein (Fragment) OS=Mus musculus GN=Kat5 PE=2 SV=1;tr|Q3UJQ1|Q3UJQ1_MOUSE HIV-1 tat interactive protein, homolog (Human), isoform CRA_a OS=Mus musculus GN=Kat5 PE=2 SV=1;sp|Q8CHK4-2|KAT5_MOUSE Isoform 2 of Histone acetyltransf	38766000	0	19312000	2002700	1336800	0	665930	37287000	0	25534000	3	3	3	8	8	8	52.961	0	4.7148	58078000	3	3	0	0	3	0	1	3	0	1	3	0	1
347	A3KCG1;Q8BWG9	A3KCG1;Q8BWG9	Calcium release-activated calcium channel protein 1	Orai1	tr|A3KCG1|A3KCG1_MOUSE Calcium release-activated calcium channel 1 OS=Mus musculus GN=Orai1 PE=2 SV=1;sp|Q8BWG9|CRCM1_MOUSE Calcium release-activated calcium channel protein 1 OS=Mus musculus GN=Orai1 PE=2 SV=1	4810700	10738000	18324000	4234100	601340	1342200	2290500	0	14598000	23254000	2	2	2	8.2	8.2	8.2	33.061	0.0003217	2.7758	33873000	3	1	1	1	1	1	1	1	1	1	1	1	1
348	A3KFM7-2;A3KFM7;A3KFM8;Q8BIE8;Q3TSG0;Q8BIM5;Q8BUB9;Q80YD0	A3KFM7-2;A3KFM7	Chromodomain-helicase-DNA-binding protein 6	Chd6	sp|A3KFM7-2|CHD6_MOUSE Isoform 2 of Chromodomain-helicase-DNA-binding protein 6 OS=Mus musculus GN=Chd6;sp|A3KFM7|CHD6_MOUSE Chromodomain-helicase-DNA-binding protein 6 OS=Mus musculus GN=Chd6 PE=1 SV=1	58705000	40389000	13311000	775210	404860	278550	91800	63841000	0	0	11	8	7	5.2	3.9	3.5	305.31	0	7.0008	112410000	6	2	3	1	5	5	4	3	4	1	3	3	1
349	Q91YZ8;D3Z5M2;A3KFU5;A3KFU8;Q99LF8;Q6PHQ9;Q3UX16;V9GXG3;Q3TUS5;Q3TSA5;G5E8X2	Q91YZ8;D3Z5M2;A3KFU5;A3KFU8;Q99LF8;Q6PHQ9;Q3UX16	Polyadenylate-binding protein	Pabpc4;Gm10110	tr|Q91YZ8|Q91YZ8_MOUSE Poly(A) binding protein, cytoplasmic 4 OS=Mus musculus GN=Pabpc4 PE=2 SV=1;tr|D3Z5M2|D3Z5M2_MOUSE Protein Gm10110 OS=Mus musculus GN=Gm10110 PE=4 SV=1;tr|A3KFU5|A3KFU5_MOUSE Protein Pabpc4 OS=Mus musculus GN=Pabpc4 PE=4 SV=1;tr|A3KFU	5173200000	4019000000	4309700000	346200000	132650000	103050000	110510000	5828100000	5844700000	5771600000	26	17	16	45.2	28.9	28.9	67.852	0	43.255	13502000000	93	28	34	31	21	25	21	13	16	12	12	15	11
350	A3KG01;A3KG02;A3KG00;Q6P5F1;P54763;P54763-2;F6Q4H2	A3KG01;A3KG02;A3KG00;Q6P5F1;P54763;P54763-2	Receptor protein-tyrosine kinase;Ephrin type-B receptor 2	Ephb2	tr|A3KG01|A3KG01_MOUSE Eph receptor B2 OS=Mus musculus GN=Ephb2 PE=2 SV=2;tr|A3KG02|A3KG02_MOUSE Ephrin type-B receptor 2 OS=Mus musculus GN=Ephb2 PE=4 SV=1;tr|A3KG00|A3KG00_MOUSE Ephrin type-B receptor 2 OS=Mus musculus GN=Ephb2 PE=4 SV=2;tr|Q6P5F1|Q6P5F1	80940000	151750000	78385000	5760600	1498900	2810200	1451600	129780000	112260000	135110000	11	9	8	16	14.1	12.5	109.9	0	11.707	311070000	13	4	7	2	6	10	4	5	8	3	4	7	3
351	A3KG93;Q6ZQ88;G8JL40;F6Z4I3;F6ZC60	A3KG93;Q6ZQ88;G8JL40	Lysine-specific histone demethylase 1A	Kdm1a	tr|A3KG93|A3KG93_MOUSE Lysine-specific histone demethylase 1A OS=Mus musculus GN=Kdm1a PE=4 SV=1;sp|Q6ZQ88|KDM1A_MOUSE Lysine-specific histone demethylase 1A OS=Mus musculus GN=Kdm1a PE=1 SV=2;tr|G8JL40|G8JL40_MOUSE Lysine-specific histone demethylase 1A (	1449400000	887260000	1252700000	79765000	32210000	19717000	27839000	1689500000	1320700000	1388600000	28	28	28	46.8	46.8	46.8	94.658	0	56.465	3589400000	72	28	20	24	24	18	19	24	18	19	24	18	19
352	B9EKQ1;A3KGB4	B9EKQ1;A3KGB4	TBC1 domain family member 8B	Tbc1d8b	tr|B9EKQ1|B9EKQ1_MOUSE Tbc1d8b protein OS=Mus musculus GN=Tbc1d8b PE=2 SV=1;sp|A3KGB4|TBC8B_MOUSE TBC1 domain family member 8B OS=Mus musculus GN=Tbc1d8b PE=2 SV=1	515540000	336200000	342080000	20583000	8888600	5796500	5897800	585480000	526740000	479820000	17	17	17	22.6	22.6	22.6	127.47	0	37.346	1193800000	32	13	8	11	10	8	10	10	8	10	10	8	10
353	A3KGF9	A3KGF9	Uncharacterized protein C15orf52 homolog		sp|A3KGF9|CO052_MOUSE Uncharacterized protein C15orf52 homolog OS=Mus musculus PE=1 SV=1	51774000	79293000	13780000	5173100	1849100	2831900	492150	56236000	83824000	37919000	4	4	4	15.2	15.2	15.2	58.688	0.00016946	3.5582	144850000	9	3	4	2	3	4	1	3	4	1	3	4	1
354	A3KGG8;Q9D9Z1;H3BKK2;F7BE71;A3KGG6;Q9CYZ4	A3KGG8;Q9D9Z1;H3BKK2;F7BE71;A3KGG6	Small kinetochore-associated protein	Knstrn	tr|A3KGG8|A3KGG8_MOUSE Small kinetochore-associated protein OS=Mus musculus GN=Knstrn PE=4 SV=1;sp|Q9D9Z1|SKAP_MOUSE Small kinetochore-associated protein OS=Mus musculus GN=Knstrn PE=2 SV=2;tr|H3BKK2|H3BKK2_MOUSE Small kinetochore-associated protein (Fragm	327030000	467720000	402500000	74828000	20439000	29232000	25156000	450710000	460670000	472300000	5	5	5	34.6	34.6	34.6	26.495	0	10.83	1197200000	12	3	6	3	3	5	4	3	5	4	3	5	4
355	A3KGI3;Q66JQ7;A3KGI5;Q9CYF0	A3KGI3;Q66JQ7	Protein CASC5	Casc5	tr|A3KGI3|A3KGI3_MOUSE Protein CASC5 OS=Mus musculus GN=Casc5 PE=4 SV=1;sp|Q66JQ7|CASC5_MOUSE Protein CASC5 OS=Mus musculus GN=Casc5 PE=2 SV=3	121910000	84265000	89509000	2274500	937790	648190	688530	116760000	141140000	142950000	6	6	6	3.8	3.8	3.8	238.18	0	7.9436	295690000	10	3	5	2	3	4	2	3	4	2	3	4	2
356	Q5BL14;Q58E57;A3KGL9;F6W687;P09602;Q5XK38;E9Q2Z4;B7ZCQ3;J3QM43	Q5BL14;Q58E57;A3KGL9;F6W687;P09602;Q5XK38;E9Q2Z4;B7ZCQ3	Non-histone chromosomal protein HMG-17	Hmgn2;Gm16494	tr|Q5BL14|Q5BL14_MOUSE High mobility group nucleosomal binding domain 2 OS=Mus musculus GN=Hmgn2 PE=2 SV=1;tr|Q58E57|Q58E57_MOUSE High mobility group nucleosomal binding domain 2 OS=Mus musculus GN=Hmgn2 PE=2 SV=1;tr|A3KGL9|A3KGL9_MOUSE Non-histone chromos	494700000	189260000	153660000	209400000	123670000	47314000	38415000	580210000	279480000	179100000	6	6	6	40	40	40	9.4226	0	82.969	837620000	17	7	5	5	6	6	6	6	6	6	6	6	6
357	A3KGQ6;Q9D898	A3KGQ6;Q9D898	Actin-related protein 2/3 complex subunit 5;Actin-related protein 2/3 complex subunit 5-like protein	Arpc5l	tr|A3KGQ6|A3KGQ6_MOUSE Actin-related protein 2/3 complex subunit 5 OS=Mus musculus GN=Arpc5l PE=3 SV=1;sp|Q9D898|ARP5L_MOUSE Actin-related protein 2/3 complex subunit 5-like protein OS=Mus musculus GN=Arpc5l PE=1 SV=1	1183500000	756550000	1207400000	262290000	98626000	63046000	100620000	1401300000	1098200000	1347700000	7	7	7	62.7	62.7	62.7	17.109	0	31.363	3147500000	28	8	9	11	6	6	6	6	6	6	6	6	6
358	A3KGR9;Q9D8V0-4;Q861Q5;Q6PGJ8;Q8HWB1;Q9D8V0-2	A3KGR9;Q9D8V0-4	Minor histocompatibility antigen H13	H13;Hm13	tr|A3KGR9|A3KGR9_MOUSE Minor histocompatibility antigen H13 (Fragment) OS=Mus musculus GN=H13 PE=4 SV=1;sp|Q9D8V0-4|HM13_MOUSE Isoform 4 of Minor histocompatibility antigen H13 OS=Mus musculus GN=Hm13	0	42486000	46916000	5258900	0	2499200	2759800	0	43099000	55086000	8	1	1	25.9	6.1	6.1	38.174	0.000625	2.3963	89402000	2	0	1	1	5	5	5	0	1	1	0	1	1
359	B2RX86;F7CGP0;A3KGS3-2;A3KGS3	B2RX86;F7CGP0;A3KGS3-2;A3KGS3	Ral GTPase-activating protein subunit alpha-2	Ralgapa2	tr|B2RX86|B2RX86_MOUSE A230067G21Rik protein OS=Mus musculus GN=Ralgapa2 PE=2 SV=1;tr|F7CGP0|F7CGP0_MOUSE Ral GTPase-activating protein subunit alpha-2 (Fragment) OS=Mus musculus GN=Ralgapa2 PE=1 SV=1;sp|A3KGS3-2|RGPA2_MOUSE Isoform 2 of Ral GTPase-activat	0	0	0	0	0	0	0	0	0	0	2	1	1	2.1	1.1	1.1	64.558	1	-2	0	0	0	0	0	1	1	0	0	1	0	0	1	0
360	A3KGT2;V9GX43;S4R2U7;S4R1S7;E9QA47;Q9Z0H4-11;Q9Z0H4-7;Q9Z0H4-5;Q9Z0H4-4;Q9Z0H4;Q9Z0H4-8;Q9Z0H4-2;Q9Z0H4-6;Q9Z0H4-9;S4R2J2;S4R2L5;A3KGT0;S4R2S7	A3KGT2;V9GX43;S4R2U7;S4R1S7;E9QA47;Q9Z0H4-11;Q9Z0H4-7;Q9Z0H4-5;Q9Z0H4-4;Q9Z0H4;Q9Z0H4-8;Q9Z0H4-2;Q9Z0H4-6;Q9Z0H4-9;S4R2J2;S4R2L5;A3KGT0	CUGBP Elav-like family member 2	Celf2	tr|A3KGT2|A3KGT2_MOUSE CUGBP Elav-like family member 2 (Fragment) OS=Mus musculus GN=Celf2 PE=4 SV=1;tr|V9GX43|V9GX43_MOUSE CUGBP Elav-like family member 2 (Fragment) OS=Mus musculus GN=Celf2 PE=4 SV=1;tr|S4R2U7|S4R2U7_MOUSE CUGBP Elav-like family member 2	65311000	36744000	149160000	14778000	3841800	2161400	8774400	83082000	103530000	118710000	3	3	3	13.5	13.5	13.5	22.53	0	7.1804	251220000	6	2	1	3	2	1	3	2	1	3	2	1	3
361	A3KGU5;E9Q447;Q3V1V5;Q3URW8;Q3TYI8;Q58ES7;Q6PA04;A3KGU9;Q3TNY2;A3KGU4	A3KGU5;E9Q447		Sptan1	tr|A3KGU5|A3KGU5_MOUSE Spectrin alpha chain, non-erythrocytic 1 OS=Mus musculus GN=Sptan1 PE=1 SV=1;tr|E9Q447|E9Q447_MOUSE Spectrin alpha chain, non-erythrocytic 1 OS=Mus musculus GN=Sptan1 PE=1 SV=1	461050000	379960000	468510000	6965500	2452400	2021100	2492100	567450000	392120000	425630000	142	1	0	67.6	0.8	0	282.89	0	7.9794	1309500000	9	3	3	3	126	126	125	1	1	1	0	0	0
362	Q3UFG2;A3KGV9;V9GXZ0;A3KGW0;A3KGV1-7;A3KGV1-6;A3KGV1-5;A3KGV1-2;A3KGV1-3;A3KGV1-4;A3KGV1	Q3UFG2;A3KGV9;V9GXZ0;A3KGW0;A3KGV1-7;A3KGV1-6;A3KGV1-5;A3KGV1-2;A3KGV1-3;A3KGV1-4;A3KGV1	Outer dense fiber protein 2	Odf2	tr|Q3UFG2|Q3UFG2_MOUSE Putative uncharacterized protein (Fragment) OS=Mus musculus GN=Odf2 PE=2 SV=1;tr|A3KGV9|A3KGV9_MOUSE Outer dense fiber protein 2 OS=Mus musculus GN=Odf2 PE=4 SV=1;tr|V9GXZ0|V9GXZ0_MOUSE Outer dense fiber protein 2 OS=Mus musculus GN=	0	0	0	0	0	0	0	0	0	0	1	1	1	2.5	2.5	2.5	65.811	0.00033372	3.2488	0	1	0	1	0	0	1	0	0	1	0	0	1	0
363	A3KMD2;Q8BIV3	A3KMD2;Q8BIV3	Ran-binding protein 6	Ranbp6	tr|A3KMD2|A3KMD2_MOUSE RAN binding protein 6 OS=Mus musculus GN=Ranbp6 PE=2 SV=1;sp|Q8BIV3|RNBP6_MOUSE Ran-binding protein 6 OS=Mus musculus GN=Ranbp6 PE=2 SV=3	40525000	90634000	200150000	5521800	675420	1510600	3335900	123460000	140710000	142190000	10	9	9	11.5	10.4	10.4	124.59	0	12.731	331310000	14	4	4	6	4	5	7	3	4	6	3	4	6
364	A3KMF2;Q5DTZ3;G3X8R8;P59759	A3KMF2;Q5DTZ3;G3X8R8;P59759	MKL/myocardin-like protein 2	Mkl2	tr|A3KMF2|A3KMF2_MOUSE Mkl2 protein (Fragment) OS=Mus musculus GN=Mkl2 PE=2 SV=1;tr|Q5DTZ3|Q5DTZ3_MOUSE MKIAA1243 protein (Fragment) OS=Mus musculus GN=Mkl2 PE=1 SV=1;tr|G3X8R8|G3X8R8_MOUSE MCG123888 OS=Mus musculus GN=Mkl2 PE=1 SV=1;sp|P59759|MKL2_MOUSE M	915640000	1373800000	1152000000	86036000	22891000	34344000	28801000	986200000	1468100000	1083400000	7	7	7	9.5	9.5	9.5	117.42	0	10.062	3441400000	20	7	6	7	4	3	6	4	3	6	4	3	6
365	A3KMJ8;P61759;Q3TIR6	A3KMJ8;P61759;Q3TIR6	Prefoldin subunit 3	Vbp1	tr|A3KMJ8|A3KMJ8_MOUSE Vbp1 protein (Fragment) OS=Mus musculus GN=Vbp1 PE=2 SV=1;sp|P61759|PFD3_MOUSE Prefoldin subunit 3 OS=Mus musculus GN=Vbp1 PE=2 SV=2;tr|Q3TIR6|Q3TIR6_MOUSE Prefoldin subunit 3 OS=Mus musculus GN=Vbp1 PE=2 SV=1	1730400000	1517200000	1906100000	343580000	115360000	101140000	127070000	1997200000	1663400000	2117400000	11	11	11	55	55	55	21.963	0	29.853	5153700000	47	14	16	17	9	9	10	9	9	10	9	9	10
366	A3KML3;F6VW30;P68254;F6YY69;P68254-2	A3KML3;F6VW30;P68254;F6YY69;P68254-2	14-3-3 protein theta	Ywhaq	tr|A3KML3|A3KML3_MOUSE MCG126220 OS=Mus musculus GN=Ywhaq PE=2 SV=1;tr|F6VW30|F6VW30_MOUSE 14-3-3 protein theta (Fragment) OS=Mus musculus GN=Ywhaq PE=3 SV=1;sp|P68254|1433T_MOUSE 14-3-3 protein theta OS=Mus musculus GN=Ywhaq PE=1 SV=1;tr|F6YY69|F6YY69_MOU	16351000000	20345000000	14344000000	2835500000	908400000	1130300000	796890000	17868000000	23210000000	18783000000	20	15	15	68.6	58.8	58.8	27.778	0	166.59	51040000000	121	38	42	41	19	17	19	14	12	14	14	12	14
367	Q7JCX7;Q7JCA9;G3EBA9;A3R3W7;P00416	Q7JCX7;Q7JCA9;G3EBA9;A3R3W7;P00416	Cytochrome c oxidase subunit 3	mt-Co3;COX3;COXIII	tr|Q7JCX7|Q7JCX7_MOUSE Cytochrome c oxidase subunit 3 OS=Mus musculus GN=mt-Co3 PE=2 SV=1;tr|Q7JCA9|Q7JCA9_MOUSE Cytochrome c oxidase subunit 3 OS=Mus musculus GN=COX3 PE=3 SV=1;tr|G3EBA9|G3EBA9_MOUSE Cytochrome c oxidase subunit 3 OS=Mus musculus GN=COX3	94803000	165080000	275420000	267650000	47401000	82538000	137710000	153100000	166510000	197880000	1	1	1	5.4	5.4	5.4	29.922	0.00032	2.6945	535290000	7	2	2	3	1	1	1	1	1	1	1	1	1
368	Q7JCZ0;A3R404;P03930	Q7JCZ0;A3R404;P03930	ATP synthase protein 8	mt-Atp8;ATP8;Mtatp8	tr|Q7JCZ0|Q7JCZ0_MOUSE ATP synthase protein 8 OS=Mus musculus GN=mt-Atp8 PE=1 SV=1;tr|A3R404|A3R404_MOUSE ATP synthase protein 8 OS=Mus musculus GN=ATP8 PE=3 SV=1;sp|P03930|ATP8_MOUSE ATP synthase protein 8 OS=Mus musculus GN=Mtatp8 PE=1 SV=1	828650000	694110000	847670000	474090000	165730000	138820000	169530000	1266800000	1221900000	1354700000	2	2	2	34.3	34.3	34.3	7.7662	0	5.0572	2370400000	13	4	5	4	2	2	2	2	2	2	2	2	2
369	A4FU75;Q6WQJ1	A4FU75;Q6WQJ1	Sn1-specific diacylglycerol lipase alpha	Dagla	tr|A4FU75|A4FU75_MOUSE Dagla protein (Fragment) OS=Mus musculus GN=Dagla PE=2 SV=1;sp|Q6WQJ1|DGLA_MOUSE Sn1-specific diacylglycerol lipase alpha OS=Mus musculus GN=Dagla PE=1 SV=2	442220000	353890000	371520000	22895000	8671000	6939000	7284800	477970000	527380000	532910000	17	17	17	24.4	24.4	24.4	115.24	0	53.345	1167600000	42	18	14	10	16	10	9	16	10	9	16	10	9
370	A4FUS1;Q641N3;Q5CZY9;P14131	A4FUS1;Q641N3;Q5CZY9;P14131	40S ribosomal protein S16	Rps16	tr|A4FUS1|A4FUS1_MOUSE MCG123443 OS=Mus musculus GN=Rps16 PE=2 SV=1;tr|Q641N3|Q641N3_MOUSE Rps16 protein (Fragment) OS=Mus musculus GN=Rps16 PE=2 SV=1;tr|Q5CZY9|Q5CZY9_MOUSE Rps16 protein OS=Mus musculus GN=Rps16 PE=2 SV=1;sp|P14131|RS16_MOUSE 40S ribosoma	21413000000	17132000000	21416000000	4996800000	1784500000	1427700000	1784700000	23761000000	24227000000	23139000000	10	10	10	54.1	54.1	54.1	16.445	0	23.511	59962000000	138	43	48	47	10	10	10	10	10	10	10	10	10
371	H3BJ51;A4FUU4;Q64FW2;H3BKK1;F7CW61	H3BJ51;A4FUU4;Q64FW2	All-trans-retinol 13,14-reductase	Retsat	tr|H3BJ51|H3BJ51_MOUSE All-trans-retinol 13,14-reductase OS=Mus musculus GN=Retsat PE=4 SV=1;tr|A4FUU4|A4FUU4_MOUSE Retsat protein (Fragment) OS=Mus musculus GN=Retsat PE=2 SV=1;sp|Q64FW2|RETST_MOUSE All-trans-retinol 13,14-reductase OS=Mus musculus GN=Ret	34025000	63416000	66896000	4979900	1031100	1921700	2027100	85815000	80897000	81521000	5	5	5	13.5	13.5	13.5	61.168	0	11.818	164340000	12	3	3	6	3	4	5	3	4	5	3	4	5
372	A4FUU9;B9EJ24;Q9DBC0	A4FUU9;B9EJ24;Q9DBC0	Selenoprotein O	Selo	tr|A4FUU9|A4FUU9_MOUSE 1300018J18Rik protein (Fragment) OS=Mus musculus GN=Selo PE=2 SV=1;tr|B9EJ24|B9EJ24_MOUSE Uncharacterized protein OS=Mus musculus GN=Selo PE=2 SV=1;sp|Q9DBC0|SELO_MOUSE Selenoprotein O OS=Mus musculus GN=Selo PE=2 SV=4	59032000	44249000	0	3561400	2035600	1525800	0	46787000	58069000	0	3	3	3	8.2	8.2	8.2	57.19	0	6.0739	103280000	4	3	1	0	3	1	0	3	1	0	3	1	0
373	A4FUV7;A4FUV6;F8VQL0;P16056;F6X333;Q3TCS4;Q6Q532;F6RCC5;D3YVY2;Q8BQI4;Q8BPC1;Q0VBH4;B2RUR6;Q62270;Q922K9;Q62190	A4FUV7;A4FUV6;F8VQL0;P16056	Receptor protein-tyrosine kinase;Hepatocyte growth factor receptor	Met	tr|A4FUV7|A4FUV7_MOUSE Met protein (Fragment) OS=Mus musculus GN=Met PE=2 SV=1;tr|A4FUV6|A4FUV6_MOUSE Met protein (Fragment) OS=Mus musculus GN=Met PE=2 SV=1;tr|F8VQL0|F8VQL0_MOUSE Hepatocyte growth factor receptor OS=Mus musculus GN=Met PE=3 SV=1;sp|P1605	441310000	305460000	317520000	14990000	6215700	4302200	4472200	488810000	389590000	442310000	16	15	15	16	15.4	15.4	153.3	0	35.134	1064300000	33	12	9	12	13	10	11	12	10	10	12	10	10
374	A4FUW0;A4FUV9;Q8BFW4;Q8BJT1;Q8BFW4-2	A4FUW0;A4FUV9;Q8BFW4;Q8BJT1;Q8BFW4-2	Tripartite motif-containing protein 65	Trim65	tr|A4FUW0|A4FUW0_MOUSE Trim65 protein (Fragment) OS=Mus musculus GN=Trim65 PE=2 SV=1;tr|A4FUV9|A4FUV9_MOUSE Trim65 protein (Fragment) OS=Mus musculus GN=Trim65 PE=2 SV=1;sp|Q8BFW4|TRI65_MOUSE Tripartite motif-containing protein 65 OS=Mus musculus GN=Trim65	74253000	107470000	71853000	10143000	2970100	4298700	2874100	77160000	144600000	82429000	6	6	6	18.7	18.7	18.7	53.883	0	6.0567	253570000	12	4	5	3	4	4	3	4	4	3	4	4	3
375	A4QPD3;P15307	A4QPD3;P15307	Proto-oncogene c-Rel	Rel	tr|A4QPD3|A4QPD3_MOUSE Proto-oncogene c-Rel OS=Mus musculus GN=Rel PE=2 SV=1;sp|P15307|REL_MOUSE Proto-oncogene c-Rel OS=Mus musculus GN=Rel PE=1 SV=2	0	32763000	17072000	1607600	0	1056900	550710	0	46325000	29541000	3	1	1	5.4	2.4	2.4	65.144	0.002556	1.8229	49835000	2	0	1	1	2	3	3	0	1	1	0	1	1
376	A4QPF5;Q8C351-2;Q8C351	A4QPF5;Q8C351-2;Q8C351	Layilin	Layn	tr|A4QPF5|A4QPF5_MOUSE Layn protein OS=Mus musculus GN=Layn PE=2 SV=1;sp|Q8C351-2|LAYN_MOUSE Isoform 2 of Layilin OS=Mus musculus GN=Layn;sp|Q8C351|LAYN_MOUSE Layilin OS=Mus musculus GN=Layn PE=1 SV=4	13478000	14533000	10613000	2758800	962730	1038000	758070	13264000	20404000	11796000	2	2	2	6.2	6.2	6.2	36.448	0.0082477	1.2767	38624000	6	2	2	2	1	1	2	1	1	2	1	1	2
377	A5A4Z2;G3UZ30;A5A4Y9;A5A4Z1;A5A4Z0;Q8K1L5	A5A4Z2;G3UZ30;A5A4Y9;A5A4Z1;A5A4Z0;Q8K1L5	Protein phosphatase 1 regulatory subunit 11	Ppp1r11	tr|A5A4Z2|A5A4Z2_MOUSE TCTEX5 isoform 2 OS=Mus musculus GN=Ppp1r11 PE=2 SV=1;tr|G3UZ30|G3UZ30_MOUSE Protein phosphatase 1 regulatory subunit 11 (Fragment) OS=Mus musculus GN=Ppp1r11 PE=4 SV=2;tr|A5A4Y9|A5A4Y9_MOUSE Protein phosphatase 1 regulatory subunit	192520000	174860000	266160000	126710000	38504000	34971000	53232000	270100000	234910000	278540000	3	3	3	53.6	53.6	53.6	10.99	0	6.5362	633530000	13	3	4	6	3	3	3	3	3	3	3	3	3
378	A5CVE4;I1E4X8;B7ZN44;B2RQE3;P83093;Q8BIM2;F6WBP9;Q8C4Z8	A5CVE4;I1E4X8;B7ZN44;B2RQE3;P83093;Q8BIM2;F6WBP9	Stromal interaction molecule 2	Stim2	tr|A5CVE4|A5CVE4_MOUSE MCG1293 OS=Mus musculus GN=Stim2 PE=2 SV=1;tr|I1E4X8|I1E4X8_MOUSE Stromal interaction molecule 2 OS=Mus musculus GN=Stim2 PE=1 SV=1;tr|B7ZN44|B7ZN44_MOUSE Stim2 protein OS=Mus musculus GN=Stim2 PE=2 SV=1;tr|B2RQE3|B2RQE3_MOUSE Stim2	131460000	148760000	55759000	7635900	2987700	3380900	1267200	146770000	203250000	140150000	8	7	7	17.7	15.5	15.5	83.924	0	14.1	335980000	9	5	2	2	6	4	3	5	3	2	5	3	2
379	B2RUK1;B7ZNY3;F6S7Z1;G3XA13;A5D6P2;Q99NH2;E0CXR8;E0CZE2;E0CZ83;Q99NH2-4;Q99NH2-2;Q8BPQ6;Q8BPQ4;E9PYJ2;F6TSJ9;E0CXL4;Q99NH2-5;Q99NH2-3;E0CY24;F6UGU7;E0CX45;Q4JJC0;F6TB42;F6T4Y3;F6URI7	B2RUK1;B7ZNY3;F6S7Z1;G3XA13;A5D6P2;Q99NH2;E0CXR8;E0CZE2;E0CZ83;Q99NH2-4;Q99NH2-2;Q8BPQ6;Q8BPQ4;E9PYJ2;F6TSJ9;E0CXL4;Q99NH2-5;Q99NH2-3;E0CY24;F6UGU7;E0CX45	Partitioning defective 3 homolog	Pard3	tr|B2RUK1|B2RUK1_MOUSE Pard3 protein OS=Mus musculus GN=Pard3 PE=2 SV=1;tr|B7ZNY3|B7ZNY3_MOUSE Pard3 protein OS=Mus musculus GN=Pard3 PE=1 SV=1;tr|F6S7Z1|F6S7Z1_MOUSE Partitioning defective 3 homolog (Fragment) OS=Mus musculus GN=Pard3 PE=1 SV=1;tr|G3XA13|	88641000	155650000	77155000	4121200	1136400	1995600	989170	130490000	95297000	117900000	9	9	9	10	10	10	145.67	0	11.243	321450000	12	3	5	4	4	5	4	4	5	4	4	5	4
380	A5D6P3;O35379;Q8C7V6;Q3UDM1;E9Q1I5;Q8BRD0;Q9JL41;D3Z407;D3YYJ6;Q9CVX4;D3YZY1;J3QML2;B2RX12-3;B2RX12-2;B2RX12	A5D6P3;O35379;Q8C7V6	Multidrug resistance-associated protein 1	Abcc1	tr|A5D6P3|A5D6P3_MOUSE ATP-binding cassette, sub-family C (CFTR/MRP), member 1 OS=Mus musculus GN=Abcc1 PE=2 SV=1;sp|O35379|MRP1_MOUSE Multidrug resistance-associated protein 1 OS=Mus musculus GN=Abcc1 PE=1 SV=1;tr|Q8C7V6|Q8C7V6_MOUSE Putative uncharacteri	1444500000	1390200000	1656800000	54775000	17616000	16954000	20205000	1897500000	2135100000	1919000000	28	28	28	26.7	26.7	26.7	171.18	0	81.035	4491600000	102	34	30	38	23	21	23	23	21	23	23	21	23
381	B2RY22;J3QP81;A5D6Q8;E9QNY9;E9QKH0;E9Q6L0;Q80TV8-2;Q80TV8;Q3TPM6	B2RY22;J3QP81;A5D6Q8;E9QNY9;E9QKH0;E9Q6L0;Q80TV8-2;Q80TV8	CLIP-associating protein 1	Clasp1	tr|B2RY22|B2RY22_MOUSE Clasp1 protein OS=Mus musculus GN=Clasp1 PE=2 SV=1;tr|J3QP81|J3QP81_MOUSE CLIP-associating protein 1 OS=Mus musculus GN=Clasp1 PE=1 SV=1;tr|A5D6Q8|A5D6Q8_MOUSE Clasp1 protein OS=Mus musculus GN=Clasp1 PE=2 SV=1;tr|E9QNY9|E9QNY9_MOUSE	2080300000	2175100000	2243600000	65647000	21013000	21971000	22663000	2397400000	2749000000	2435600000	36	36	31	32.4	32.4	29.3	160.25	0	175.87	6499000000	124	38	42	44	29	30	33	29	30	33	25	25	28
382	A5GZX3;Q9CPU0	A5GZX3;Q9CPU0	Lactoylglutathione lyase	Glo1	tr|A5GZX3|A5GZX3_MOUSE Lactoylglutathione lyase OS=Mus musculus GN=Glo1 PE=2 SV=1;sp|Q9CPU0|LGUL_MOUSE Lactoylglutathione lyase OS=Mus musculus GN=Glo1 PE=1 SV=3	2144600000	2097300000	1868800000	555520000	194970000	190660000	169890000	2528400000	2284400000	2130900000	9	9	9	51.1	51.1	51.1	20.809	0	21.894	6110700000	56	16	19	21	6	7	8	6	7	8	6	7	8
383	A5HU64;Q3SXA6;Q8BZU4;Q3MI11	A5HU64;Q3SXA6;Q8BZU4;Q3MI11		Tnip3	tr|A5HU64|A5HU64_MOUSE TNFAIP3-interacting protein 3 beta OS=Mus musculus GN=Tnip3 PE=2 SV=1;tr|Q3SXA6|Q3SXA6_MOUSE Protein Tnip3 OS=Mus musculus GN=Tnip3 PE=2 SV=1;tr|Q8BZU4|Q8BZU4_MOUSE Putative uncharacterized protein OS=Mus musculus GN=Tnip3 PE=2 SV=1;	0	0	0	0	0	0	0	0	0	0	1	1	1	7.1	7.1	7.1	23.148	1	-2	0	0	0	0	0	0	1	0	0	1	0	0	1	0
384	E9Q9T1;A6H5U5;Q3UZ39-2	E9Q9T1;A6H5U5;Q3UZ39-2	Leucine-rich repeat flightless-interacting protein 1	Lrrfip1	tr|E9Q9T1|E9Q9T1_MOUSE Leucine-rich repeat flightless-interacting protein 1 OS=Mus musculus GN=Lrrfip1 PE=1 SV=2;tr|A6H5U5|A6H5U5_MOUSE Lrrfip1 protein OS=Mus musculus GN=Lrrfip1 PE=2 SV=1;sp|Q3UZ39-2|LRRF1_MOUSE Isoform 2 of Leucine-rich repeat flightless	0	105620000	0	2514700	0	2514700	0	0	114060000	0	12	1	0	25.8	2.5	0	71.131	0.0021257	2.014	105620000	1	0	1	0	9	10	9	0	1	0	0	0	0
385	A6H5Z3;Q6PCN5;A6H5Z3-2;Q8C1X1;Q5DU10;Q9D4R7;E0CXR2;Q8K2N8;Q8C203;E0CY34	A6H5Z3;Q6PCN5;A6H5Z3-2	Exocyst complex component 6B	Exoc6b	sp|A6H5Z3|EXC6B_MOUSE Exocyst complex component 6B OS=Mus musculus GN=Exoc6b PE=2 SV=1;tr|Q6PCN5|Q6PCN5_MOUSE Exoc6b protein (Fragment) OS=Mus musculus GN=Exoc6b PE=2 SV=1;sp|A6H5Z3-2|EXC6B_MOUSE Isoform 2 of Exocyst complex component 6B OS=Mus musculus GN	404900000	237310000	325210000	18253000	7639600	4477600	6136100	417530000	347230000	393390000	15	15	15	23.2	23.2	23.2	94.128	0	19.843	967420000	34	13	9	12	12	9	10	12	9	10	12	9	10
386	Q4QQR6;F7BJB9;A6H605;Q6A0C2;Q8R0R0	Q4QQR6;F7BJB9;A6H605;Q6A0C2		Morc3	tr|Q4QQR6|Q4QQR6_MOUSE Microrchidia 3 OS=Mus musculus GN=Morc3 PE=2 SV=1;tr|F7BJB9|F7BJB9_MOUSE Protein Morc3 OS=Mus musculus GN=Morc3 PE=4 SV=1;tr|A6H605|A6H605_MOUSE Microrchidia 3 OS=Mus musculus GN=Morc3 PE=2 SV=1;tr|Q6A0C2|Q6A0C2_MOUSE MKIAA0136 prote	251830000	203370000	465690000	16444000	4496900	3631600	8315900	363700000	371200000	312800000	13	13	13	19.6	19.6	19.6	106.5	0	18.868	920890000	27	7	7	13	8	9	12	8	9	12	8	9	12
387	A6H611;Q8BLL4	A6H611;Q8BLL4	Mitochondrial intermediate peptidase	Mipep	sp|A6H611|MIPEP_MOUSE Mitochondrial intermediate peptidase OS=Mus musculus GN=Mipep PE=2 SV=1;tr|Q8BLL4|Q8BLL4_MOUSE Putative uncharacterized protein OS=Mus musculus GN=Mipep PE=2 SV=1	184100000	191720000	240140000	13391000	4002200	4167900	5220400	222450000	227180000	257330000	9	9	9	17.3	17.3	17.3	80.851	0	15.619	615970000	18	5	5	8	6	5	6	6	5	6	6	5	6
388	A6H619-2;A6H619;Q3TPL9;Q3TPE7;F7ANA1;Q3UVM8;Q7TPB8;F6WXS6	A6H619-2;A6H619	PHD and RING finger domain-containing protein 1	Phrf1	sp|A6H619-2|PHRF1_MOUSE Isoform 2 of PHD and RING finger domain-containing protein 1 OS=Mus musculus GN=Phrf1;sp|A6H619|PHRF1_MOUSE PHD and RING finger domain-containing protein 1 OS=Mus musculus GN=Phrf1 PE=2 SV=2	101510000	51787000	133310000	4698400	1664000	848970	2185400	106390000	71768000	160390000	5	5	5	7.1	7.1	7.1	167.29	0	5.3697	286600000	11	4	4	3	5	4	3	5	4	3	5	4	3
389	A6H630;A6H630-2;A6H630-4;D6RG65;A6H630-3	A6H630;A6H630-2	Protein-glutamate O-methyltransferase	Armt1	sp|A6H630|CF211_MOUSE UPF0364 protein C6orf211 homolog OS=Mus musculus PE=2 SV=1;sp|A6H630-2|CF211_MOUSE Isoform 2 of UPF0364 protein C6orf211 homolog OS=Mus musculus	398480000	472010000	475780000	49862000	14759000	17482000	17621000	591880000	561130000	472070000	14	14	14	41.7	41.7	41.7	50.548	0	38.867	1346300000	37	13	11	13	9	9	9	9	9	9	9	9	9
390	A6H659;Q3U1F9	A6H659;Q3U1F9	Phosphoprotein associated with glycosphingolipid-enriched microdomains 1	Pag1	tr|A6H659|A6H659_MOUSE Pag1 protein OS=Mus musculus GN=Pag1 PE=2 SV=1;sp|Q3U1F9|PHAG1_MOUSE Phosphoprotein associated with glycosphingolipid-enriched microdomains 1 OS=Mus musculus GN=Pag1 PE=1 SV=2	183860000	123190000	170140000	25115000	9676700	6483900	8954700	167330000	172440000	166890000	6	6	6	26.1	26.1	26.1	46.549	0	18.872	477190000	15	6	5	4	5	4	5	5	4	5	5	4	5
391	A6H663;Q9JLV1;Q3TAM9;Q9ER87	A6H663;Q9JLV1;Q3TAM9	BAG family molecular chaperone regulator 3	Bag3	tr|A6H663|A6H663_MOUSE BCL2-associated athanogene 3 OS=Mus musculus GN=Bag3 PE=2 SV=1;sp|Q9JLV1|BAG3_MOUSE BAG family molecular chaperone regulator 3 OS=Mus musculus GN=Bag3 PE=1 SV=2;tr|Q3TAM9|Q3TAM9_MOUSE Putative uncharacterized protein OS=Mus musculus	3095100000	2992000000	3534000000	246690000	79361000	76719000	90614000	3603600000	3678100000	3874200000	30	30	30	69.7	69.7	69.7	61.858	0	89.524	9621100000	129	44	44	41	25	24	23	25	24	23	25	24	23
392	G5E8Q7;A6H687	G5E8Q7;A6H687	SAC3 domain-containing protein 1	Sac3d1	tr|G5E8Q7|G5E8Q7_MOUSE SAC3 domain containing 1, isoform CRA_c OS=Mus musculus GN=Sac3d1 PE=4 SV=1;sp|A6H687|SAC31_MOUSE SAC3 domain-containing protein 1 OS=Mus musculus GN=Sac3d1 PE=1 SV=1	7069100	0	8600900	712280	321320	0	390950	6115100	0	9132300	1	1	1	5.2	5.2	5.2	46.412	0.00032216	2.7945	15670000	2	1	0	1	1	0	1	1	0	1	1	0	1
393	A6H6A9;A6H6A9-2	A6H6A9;A6H6A9-2	Rab GTPase-activating protein 1-like	Rabgap1l	sp|A6H6A9|RBG1L_MOUSE Rab GTPase-activating protein 1-like OS=Mus musculus GN=Rabgap1l PE=1 SV=1;sp|A6H6A9-2|RBG1L_MOUSE Isoform 2 of Rab GTPase-activating protein 1-like OS=Mus musculus GN=Rabgap1l	21015000	14544000	15599000	1162700	477620	330550	354510	18503000	18617000	18565000	2	1	1	3.2	2.1	2.1	92.403	0.0015385	2.1966	51158000	3	1	1	1	2	2	2	1	1	1	1	1	1
394	B7ZNL7;A6H6B9;Q60821	B7ZNL7;A6H6B9;Q60821	Zinc finger and BTB domain-containing protein 17	Zbtb17	tr|B7ZNL7|B7ZNL7_MOUSE Zinc finger and BTB domain containing 17 OS=Mus musculus GN=Zbtb17 PE=2 SV=1;tr|A6H6B9|A6H6B9_MOUSE Zinc finger and BTB domain containing 17 OS=Mus musculus GN=Zbtb17 PE=2 SV=1;sp|Q60821|ZBT17_MOUSE Zinc finger and BTB domain-contain	10173000	0	10138000	398260	199480	0	198780	10173000	0	9828100	1	1	1	2	2	2	86.741	0.00033025	3.1073	20311000	2	1	0	1	1	0	1	1	0	1	1	0	1
395	Q0VGV2;A6H6E1;P60330;Q56TS3	Q0VGV2;A6H6E1;P60330;Q56TS3	Separin	Espl1	tr|Q0VGV2|Q0VGV2_MOUSE Extra spindle poles-like 1 (S. cerevisiae) OS=Mus musculus GN=Espl1 PE=2 SV=1;tr|A6H6E1|A6H6E1_MOUSE Espl1 protein OS=Mus musculus GN=Espl1 PE=2 SV=1;sp|P60330|ESPL1_MOUSE Separin OS=Mus musculus GN=Espl1 PE=1 SV=1;tr|Q56TS3|Q56TS3_M	197950000	211960000	184900000	5310800	1767400	1892500	1650900	212670000	303330000	265640000	13	13	13	10	10	10	233.05	0	28.47	594810000	25	9	7	9	8	5	9	8	5	9	8	5	9
396	A6H6H4;Q6ZWY8	A6H6H4;Q6ZWY8	Thymosin beta-10	Tmsb10	tr|A6H6H4|A6H6H4_MOUSE MCG125727 OS=Mus musculus GN=Tmsb10 PE=2 SV=1;sp|Q6ZWY8|TYB10_MOUSE Thymosin beta-10 OS=Mus musculus GN=Tmsb10 PE=2 SV=3	639930000	684410000	712180000	509130000	159980000	171100000	178040000	722550000	776580000	659830000	1	1	1	31.8	31.8	31.8	5.0256	0.00032632	2.9306	2036500000	8	3	3	2	1	1	1	1	1	1	1	1	1
397	F6UK66;Q3TNK7;A6H6M8;Q810U5-3;Q810U5-2;Q810U5	F6UK66;Q3TNK7;A6H6M8;Q810U5-3;Q810U5-2;Q810U5	Coiled-coil domain-containing protein 50	Ccdc50	tr|F6UK66|F6UK66_MOUSE Coiled-coil domain-containing protein 50 (Fragment) OS=Mus musculus GN=Ccdc50 PE=4 SV=1;tr|Q3TNK7|Q3TNK7_MOUSE Coiled-coil domain containing 50 OS=Mus musculus GN=Ccdc50 PE=2 SV=1;tr|A6H6M8|A6H6M8_MOUSE Coiled-coil domain containing	67450000	81619000	81198000	13545000	3967600	4801100	4776400	70948000	92604000	88632000	2	2	2	8.2	8.2	8.2	29.684	0	5.8377	230270000	9	3	3	3	2	2	2	2	2	2	2	2	2
398	A6H6S8;Q8CI61	A6H6S8;Q8CI61	BAG family molecular chaperone regulator 4	Bag4	tr|A6H6S8|A6H6S8_MOUSE BCL2-associated athanogene 4 OS=Mus musculus GN=Bag4 PE=2 SV=1;sp|Q8CI61|BAG4_MOUSE BAG family molecular chaperone regulator 4 OS=Mus musculus GN=Bag4 PE=1 SV=2	140760000	76162000	156900000	23364000	8797500	4760100	9806300	183410000	117300000	108560000	5	5	5	14.2	14.2	14.2	49.094	0	23.112	373820000	11	3	4	4	4	3	4	4	3	4	4	3	4
399	A6H8H2;A6H8H2-2;E9Q449;Q3U2Y9	A6H8H2;A6H8H2-2;E9Q449	DENN domain-containing protein 4C	Dennd4c	sp|A6H8H2|DEN4C_MOUSE DENN domain-containing protein 4C OS=Mus musculus GN=Dennd4c PE=1 SV=1;sp|A6H8H2-2|DEN4C_MOUSE Isoform 2 of DENN domain-containing protein 4C OS=Mus musculus GN=Dennd4c;tr|E9Q449|E9Q449_MOUSE DENN domain-containing protein 4C OS=Mus m	781020000	654230000	637120000	20519000	7732900	6477600	6308100	914880000	801950000	981500000	25	25	25	20.4	20.4	20.4	211.46	0	52.398	2072400000	61	21	19	21	18	17	17	18	17	17	18	17	17
400	A6MDC5;Q8VE98	A6MDC5;Q8VE98	CD276 antigen	Cd276	tr|A6MDC5|A6MDC5_MOUSE CD276 antigen OS=Mus musculus GN=Cd276 PE=2 SV=1;sp|Q8VE98|CD276_MOUSE CD276 antigen OS=Mus musculus GN=Cd276 PE=1 SV=1	0	15505000	24186000	3307600	0	1292100	2015500	0	0	23447000	2	2	2	11.4	11.4	11.4	34.001	0.0006251	2.4014	39691000	1	0	0	1	0	1	1	0	1	1	0	1	1
401	A6MDD3;Q8R422	A6MDD3;Q8R422	CD109 antigen	Cd109	tr|A6MDD3|A6MDD3_MOUSE CD109 antigen OS=Mus musculus GN=Cd109 PE=2 SV=1;sp|Q8R422|CD109_MOUSE CD109 antigen OS=Mus musculus GN=Cd109 PE=2 SV=1	3749500000	2987000000	3162700000	135610000	51363000	40917000	43325000	3904200000	4116900000	3951400000	40	40	40	35.2	35.2	35.2	161.66	0	157.18	9899200000	136	48	43	45	32	32	33	32	32	33	32	32	33
402	Q7TPU7;E9PV80;A6P3E3;Q61026;Q8CBM5;Q8BN74	Q7TPU7;E9PV80;A6P3E3;Q61026;Q8CBM5;Q8BN74	Nuclear receptor coactivator 2	Ncoa2	tr|Q7TPU7|Q7TPU7_MOUSE Ncoa2 protein OS=Mus musculus GN=Ncoa2 PE=2 SV=1;tr|E9PV80|E9PV80_MOUSE Nuclear receptor coactivator 2 OS=Mus musculus GN=Ncoa2 PE=1 SV=1;tr|A6P3E3|A6P3E3_MOUSE Glucocorticoid receptor interacting protein 1 OS=Mus musculus GN=Ncoa2 P	0	8562800	14110000	371690	0	140370	231310	0	11641000	17906000	2	2	2	2.4	2.4	2.4	151.38	0.00032242	2.803	22673000	1	0	1	0	1	1	1	1	1	1	1	1	1
403	A6P3E4;G3X8U9;Q544A0;Q7TSJ7;Q91Y86;A3KBF5;D3Z1Z4	A6P3E4;G3X8U9;Q544A0;Q7TSJ7;Q91Y86;A3KBF5;D3Z1Z4	Mitogen-activated protein kinase;Mitogen-activated protein kinase 8	Mapk8	tr|A6P3E4|A6P3E4_MOUSE JNK1 beta1 protein kinase OS=Mus musculus GN=Mapk8 PE=1 SV=1;tr|G3X8U9|G3X8U9_MOUSE Mitogen activated protein kinase 8, isoform CRA_b OS=Mus musculus GN=Mapk8 PE=4 SV=1;tr|Q544A0|Q544A0_MOUSE Mitogen activated protein kinase 8, isofo	181640000	141660000	122870000	18591000	7568300	5902600	5119700	213440000	205470000	168670000	6	5	4	25	21.9	18.2	44.021	0	20.059	446170000	14	6	5	3	5	4	3	4	4	3	3	3	3
404	A6PW47;Q99K74-2;Q99K74;Q99K74-3;A6PW46	A6PW47;Q99K74-2;Q99K74;Q99K74-3	Mediator of RNA polymerase II transcription subunit 24	Med24	tr|A6PW47|A6PW47_MOUSE Mediator of RNA polymerase II transcription subunit 24 OS=Mus musculus GN=Med24 PE=1 SV=1;sp|Q99K74-2|MED24_MOUSE Isoform 2 of Mediator of RNA polymerase II transcription subunit 24 OS=Mus musculus GN=Med24;sp|Q99K74|MED24_MOUSE Medi	168440000	109990000	211460000	8748200	3007800	1964200	3776100	224000000	160250000	203510000	10	10	10	12	12	12	111.86	0	15.02	489900000	19	6	4	9	4	4	8	4	4	8	4	4	8
405	A6PWX9;Q9CWU6;A6PWX5;A6PWX8;D6RJ83;A6PWX7;F6V305;Q9CWU6-2	A6PWX9;Q9CWU6;A6PWX5;A6PWX8;D6RJ83;A6PWX7;F6V305	Ubiquinol-cytochrome-c reductase complex assembly factor 1	Uqcc1	tr|A6PWX9|A6PWX9_MOUSE Ubiquinol-cytochrome-c reductase complex assembly factor 1 OS=Mus musculus GN=Uqcc1 PE=4 SV=1;sp|Q9CWU6|UQCC1_MOUSE Ubiquinol-cytochrome-c reductase complex assembly factor 1 OS=Mus musculus GN=Uqcc1 PE=2 SV=1;tr|A6PWX5|A6PWX5_MOUSE	360610000	293510000	271270000	51411000	20034000	16306000	15071000	394540000	402400000	421820000	4	4	4	19.7	19.7	19.7	31.32	0	8.2749	925390000	21	8	6	7	3	4	4	3	4	4	3	4	4
406	A6PWY4-2;A6PWY4;Z4YK23;A6PWY4-3	A6PWY4-2;A6PWY4	WD repeat-containing protein 76	Wdr76	sp|A6PWY4-2|WDR76_MOUSE Isoform 2 of WD repeat-containing protein 76 OS=Mus musculus GN=Wdr76;sp|A6PWY4|WDR76_MOUSE WD repeat-containing protein 76 OS=Mus musculus GN=Wdr76 PE=2 SV=1	78315000	124070000	86231000	9952300	2700500	4278400	2973500	0	160600000	0	5	5	5	12.2	12.2	12.2	57.96	0	5.9676	288620000	5	2	2	1	3	3	2	3	3	2	3	3	2
407	A6X919;A6X919-2;A6X919-3;P0CW70	A6X919;A6X919-2	Probable C-mannosyltransferase DPY19L1	Dpy19l1	sp|A6X919|D19L1_MOUSE Probable C-mannosyltransferase DPY19L1 OS=Mus musculus GN=Dpy19l1 PE=2 SV=1;sp|A6X919-2|D19L1_MOUSE Isoform 2 of Probable C-mannosyltransferase DPY19L1 OS=Mus musculus GN=Dpy19l1	541240000	822880000	476280000	54129000	15919000	24202000	14008000	725800000	827480000	691270000	11	11	11	20.8	20.8	20.8	84.186	0	18.747	1840400000	31	11	10	10	10	8	9	10	8	9	10	8	9
408	E9Q5L2;E9PVD2;A6X935-2;A6X935	E9Q5L2;E9PVD2;A6X935-2;A6X935	Inter alpha-trypsin inhibitor, heavy chain 4	Itih4	tr|E9Q5L2|E9Q5L2_MOUSE Inter alpha-trypsin inhibitor, heavy chain 4 OS=Mus musculus GN=Itih4 PE=4 SV=1;tr|E9PVD2|E9PVD2_MOUSE Inter alpha-trypsin inhibitor, heavy chain 4 OS=Mus musculus GN=Itih4 PE=4 SV=1;sp|A6X935-2|ITIH4_MOUSE Isoform 2 of Inter alpha-t	0	0	0	0	0	0	0	0	0	0	1	1	1	1.6	1.6	1.6	102.82	1	-2	0	0	0	0	0	1	1	1	1	1	1	1	1	1
409	A6ZI44;Q9CPQ9;A6ZI46;D3YV98;A6ZI47;P05063;Q3UER1;Q3TJ66;Q91Y97	A6ZI44;Q9CPQ9;A6ZI46;D3YV98	Fructose-bisphosphate aldolase	Aldoa;Aldoart1	tr|A6ZI44|A6ZI44_MOUSE Aldolase A splice variant 2 OS=Mus musculus GN=Aldoa PE=2 SV=1;tr|Q9CPQ9|Q9CPQ9_MOUSE Protein Aldoart1 OS=Mus musculus GN=Aldoart1 PE=2 SV=1;tr|A6ZI46|A6ZI46_MOUSE Aldolase A retroprotein 1 OS=Mus musculus GN=Aldoart1 PE=2 SV=1;tr|D3	274870000	354880000	407760000	41500000	10995000	14195000	16311000	572110000	344150000	458210000	28	1	1	73.9	4.8	4.8	45.12	0	5.0226	1037500000	6	2	2	2	28	27	27	1	1	1	1	1	1
410	A7ISP9;F8WJ93;Q3UMY5;Q3UMY5-4;Q3UMY5-2;Q3UMY5-3;Q3TGL8	A7ISP9;F8WJ93;Q3UMY5;Q3UMY5-4;Q3UMY5-2;Q3UMY5-3	Echinoderm microtubule-associated protein-like 4	Eml4	tr|A7ISP9|A7ISP9_MOUSE EMAP-like protein 4 OS=Mus musculus GN=Eml4 PE=2 SV=1;tr|F8WJ93|F8WJ93_MOUSE Echinoderm microtubule-associated protein-like 4 OS=Mus musculus GN=Eml4 PE=1 SV=1;sp|Q3UMY5|EMAL4_MOUSE Echinoderm microtubule-associated protein-like 4 OS	1085500000	582830000	505520000	38138000	19044000	10225000	8868700	837510000	866770000	948830000	15	15	15	22.8	22.8	22.8	108.71	0	27.416	2173900000	38	12	11	15	9	12	10	9	12	10	9	12	10
411	A7LP29;Q64364-2;Q64364	A7LP29;Q64364-2;Q64364	Tumor suppressor ARF	Cdkn2a	tr|A7LP29|A7LP29_MOUSE Mitochondrial smARF variant OS=Mus musculus GN=Cdkn2a PE=2 SV=1;sp|Q64364-2|CD2A2_MOUSE Isoform 4 of Cyclin-dependent kinase inhibitor 2A, isoform 3 OS=Mus musculus GN=Cdkn2a;sp|Q64364|CD2A2_MOUSE Cyclin-dependent kinase inhibitor 2A	25059000	36115000	0	6797100	2784300	4012800	0	25059000	37656000	0	1	1	1	8.8	8.8	8.8	14.096	0.00032087	2.7443	61174000	3	1	1	1	1	1	1	1	1	1	1	1	1
412	Q8BZ59;A7M7S2;Q8BXG6;Q8VIJ8	Q8BZ59;A7M7S2;Q8BXG6;Q8VIJ8	Nitrogen permease regulator 3-like protein	Nprl3	tr|Q8BZ59|Q8BZ59_MOUSE Putative uncharacterized protein OS=Mus musculus GN=Nprl3 PE=2 SV=1;tr|A7M7S2|A7M7S2_MOUSE Nitrogen permease regulator 3-like protein OS=Mus musculus GN=Nprl3 PE=4 SV=1;tr|Q8BXG6|Q8BXG6_MOUSE Putative uncharacterized protein OS=Mus m	21842000	85809000	36385000	5761400	873690	3432300	1455400	54461000	48072000	68827000	3	3	3	7.3	7.3	7.3	55.054	0.00017235	3.8968	144040000	4	1	2	1	1	2	2	1	2	2	1	2	2
413	A7MCT8;Q3UNI1;Q53Z05;Q923E4;Q923E4-2;F6YAQ3;Q3USY7	A7MCT8;Q3UNI1;Q53Z05;Q923E4;Q923E4-2	NAD-dependent protein deacetylase sirtuin-1;SirtT1 75 kDa fragment	Sirt1	tr|A7MCT8|A7MCT8_MOUSE Sirt1 protein OS=Mus musculus GN=Sirt1 PE=2 SV=1;tr|Q3UNI1|Q3UNI1_MOUSE NAD-dependent protein deacetylase sirtuin-1 OS=Mus musculus GN=Sirt1 PE=2 SV=1;tr|Q53Z05|Q53Z05_MOUSE Sir2alpha OS=Mus musculus GN=Sirt1 PE=2 SV=1;sp|Q923E4|SIR1	74182000	60906000	21432000	5217300	2472700	2030200	714420	60325000	56854000	63822000	3	3	2	5.9	5.9	4.7	64.114	0	4.4388	156520000	5	2	2	1	2	2	1	2	2	1	2	1	1
414	A7VJ98;Q9CQI3;Q80X87;D3YY93;D3Z2F6;D3YY16;A7VJA4;Q9ERL7	A7VJ98;Q9CQI3;Q80X87	Glia maturation factor beta	Gmfb	tr|A7VJ98|A7VJ98_MOUSE Glia maturation factor beta OS=Mus musculus GN=Gmfb PE=2 SV=1;sp|Q9CQI3|GMFB_MOUSE Glia maturation factor beta OS=Mus musculus GN=Gmfb PE=1 SV=3;tr|Q80X87|Q80X87_MOUSE Glia maturation factor, beta OS=Mus musculus GN=Gmfb PE=2 SV=1	1999900000	1279600000	2521000000	580050000	199990000	127960000	252100000	1983300000	1857800000	2190800000	6	6	6	53.5	53.5	53.5	16.722	0	70.587	5800500000	32	9	10	13	6	6	6	6	6	6	6	6	6
415	Q3THE7;A7VL18;Q3U367;Q3TG52;Q9JLJ2;Q3UDG0;Q3TMT4;Q3V1N7;Q9CRH9	Q3THE7;A7VL18;Q3U367;Q3TG52;Q9JLJ2;Q3UDG0;Q3TMT4;Q3V1N7	4-trimethylaminobutyraldehyde dehydrogenase	Aldh9a1	tr|Q3THE7|Q3THE7_MOUSE Putative uncharacterized protein OS=Mus musculus GN=Aldh9a1 PE=2 SV=1;tr|A7VL18|A7VL18_MOUSE Gamma-aminobutyraldehyde dehydrogenase OS=Mus musculus GN=Aldh9a1 PE=2 SV=1;tr|Q3U367|Q3U367_MOUSE 4-trimethylaminobutyraldehyde dehydrogena	4758200000	4409900000	5818700000	516790000	164080000	152070000	200640000	5913500000	6317500000	6559400000	20	20	20	54.5	54.5	54.5	53.513	0	192.78	14987000000	84	27	26	31	17	14	19	17	14	19	17	14	19
416	A7YB12;Q91WK7;F6QTQ3;D6REF6;B7ZBY0	A7YB12;Q91WK7;F6QTQ3;D6REF6;B7ZBY0	Ankyrin repeat domain-containing protein 54	Ankrd54	tr|A7YB12|A7YB12_MOUSE Ankyrin repeat domain 54, isoform CRA_c OS=Mus musculus GN=Ankrd54 PE=2 SV=1;sp|Q91WK7|ANR54_MOUSE Ankyrin repeat domain-containing protein 54 OS=Mus musculus GN=Ankrd54 PE=1 SV=1;tr|F6QTQ3|F6QTQ3_MOUSE Ankyrin repeat domain-containi	0	27375000	15376000	3288500	0	2105700	1182800	0	24943000	21462000	2	2	2	9.7	9.7	9.7	32.485	0.00033151	3.1599	42751000	2	0	1	1	0	2	1	0	2	1	0	2	1
417	A7YY80;D0VYV7;B6ZHD1;Q8BGK4;Q8BT38;A7MCX4	A7YY80;D0VYV7;B6ZHD1;Q8BGK4		Epb4.1l3	tr|A7YY80|A7YY80_MOUSE 130kDa Protein 4.1B MEF cell isoform OS=Mus musculus GN=Epb4.1l3 PE=2 SV=1;tr|D0VYV7|D0VYV7_MOUSE Erythrocyte protein band 4.1-like 3 isoform C OS=Mus musculus GN=Epb4.1l3 PE=2 SV=1;tr|B6ZHD1|B6ZHD1_MOUSE Erythrocyte protein band 4.1	6414000000	6112300000	6698500000	362730000	121020000	115330000	126390000	6663200000	7626800000	7224500000	41	37	0	58.6	54.5	0	97.596	0	176.55	19225000000	191	71	62	58	38	35	34	34	31	30	0	0	0
418	A8C1T7;Q91XD7	A8C1T7;Q91XD7	Cysteine-rich with EGF-like domain protein 1	Creld1	tr|A8C1T7|A8C1T7_MOUSE Cysteine-rich with EGF-like domains 1 OS=Mus musculus GN=Creld1 PE=2 SV=1;sp|Q91XD7|CREL1_MOUSE Cysteine-rich with EGF-like domain protein 1 OS=Mus musculus GN=Creld1 PE=2 SV=1	607740000	560380000	500040000	72528000	26423000	24364000	21741000	739430000	564070000	845180000	8	8	8	28.8	28.8	28.8	45.717	0	25.6	1668200000	26	8	10	8	6	8	4	6	8	4	6	8	4
419	A8C1U1;Q80XR4;Q545L1;Q3TXC6;Q3TVZ0;Q3THL4;Q3U364;Q9QY33;Q8BPU2	A8C1U1;Q80XR4;Q545L1;Q3TXC6;Q3TVZ0;Q3THL4;Q3U364;Q9QY33;Q8BPU2	Tetraspanin;Tetraspanin-3	Tspan3	tr|A8C1U1|A8C1U1_MOUSE H41D4 protein (Fragment) OS=Mus musculus GN=Tspan3 PE=2 SV=1;tr|Q80XR4|Q80XR4_MOUSE Tetraspanin 3 OS=Mus musculus GN=Tspan3 PE=2 SV=1;tr|Q545L1|Q545L1_MOUSE Tetraspanin OS=Mus musculus GN=Tspan3 PE=2 SV=1;tr|Q3TXC6|Q3TXC6_MOUSE Putat	104950000	233650000	0	37622000	11661000	25961000	0	238200000	196330000	0	2	2	2	9.2	9.2	9.2	27.599	0	7.0442	338600000	5	1	3	1	1	2	1	1	2	1	1	2	1
420	A8C756;A8C756-2;A8C756-3;A8C756-4;A8C756-5	A8C756	Thyroid adenoma-associated protein homolog	Thada	sp|A8C756|THADA_MOUSE Thyroid adenoma-associated protein homolog OS=Mus musculus GN=Thada PE=2 SV=1	465040000	651050000	865020000	18515000	4346200	6084600	8084300	814870000	826500000	763300000	25	25	25	18	18	18	217.29	0	37.187	1981100000	54	13	18	23	13	18	20	13	18	20	13	18	20
421	A8CVP4;Q99JW4;A8CVP1;Q4ZJB3;E9QP62;Q9D7B2;Q91XD2	A8CVP4;Q99JW4;A8CVP1;Q4ZJB3;E9QP62;Q9D7B2	LIM and senescent cell antigen-like-containing domain protein 1	Lims1	tr|A8CVP4|A8CVP4_MOUSE LIM and senescent cell antigen-like domains 1 isoform B OS=Mus musculus GN=Lims1 PE=2 SV=1;sp|Q99JW4|LIMS1_MOUSE LIM and senescent cell antigen-like-containing domain protein 1 OS=Mus musculus GN=Lims1 PE=1 SV=3;tr|A8CVP1|A8CVP1_MOUS	1543800000	1381000000	1522000000	234040000	81252000	72685000	80103000	1588200000	1608800000	1891500000	15	15	15	51.1	51.1	51.1	37.241	0	44.306	4446800000	48	18	14	16	13	12	10	13	12	10	13	12	10
422	A8IP69;P61982	A8IP69;P61982	14-3-3 protein gamma;14-3-3 protein gamma, N-terminally processed	Ywhag	tr|A8IP69|A8IP69_MOUSE 14-3-3 protein gamma subtype OS=Mus musculus GN=Ywhag PE=2 SV=1;sp|P61982|1433G_MOUSE 14-3-3 protein gamma OS=Mus musculus GN=Ywhag PE=1 SV=2	11920000000	11966000000	10429000000	1906400000	662230000	664750000	579380000	11715000000	11470000000	12920000000	17	13	12	74.1	64	60.3	28.302	0	114.06	34315000000	91	31	33	27	17	17	16	13	13	12	12	12	11
423	A8Y5J3;Q9CWS4;D6RH69	A8Y5J3;Q9CWS4	Integrator complex subunit 11	Cpsf3l	tr|A8Y5J3|A8Y5J3_MOUSE Integrator complex subunit 11 OS=Mus musculus GN=Cpsf3l PE=4 SV=1;sp|Q9CWS4|INT11_MOUSE Integrator complex subunit 11 OS=Mus musculus GN=Cpsf3l PE=2 SV=1	25907000	36151000	141160000	5806300	740210	1032900	4033200	50369000	56327000	116080000	4	4	4	7.1	7.1	7.1	65.42	0	4.5784	203220000	8	2	2	4	1	2	4	1	2	4	1	2	4
424	A8Y5N8;Q91WB4	A8Y5N8;Q91WB4	Pleckstrin homology domain-containing family F member 2	Plekhf2	tr|A8Y5N8|A8Y5N8_MOUSE Pleckstrin homology domain-containing family F member 2 (Fragment) OS=Mus musculus GN=Plekhf2 PE=4 SV=1;sp|Q91WB4|PKHF2_MOUSE Pleckstrin homology domain-containing family F member 2 OS=Mus musculus GN=Plekhf2 PE=1 SV=1	12724000	56340000	24055000	6651400	908880	4024300	1718200	16432000	75665000	0	2	2	2	16.2	16.2	16.2	22.106	0.00033063	3.1257	93120000	3	1	1	1	1	1	1	1	1	1	1	1	1
425	A8Y5T6;Q8CFI5;Q3U4M2;A2AVQ7	A8Y5T6;Q8CFI5;Q3U4M2	Probable proline--tRNA ligase, mitochondrial	Pars2	tr|A8Y5T6|A8Y5T6_MOUSE Probable proline--tRNA ligase, mitochondrial OS=Mus musculus GN=Pars2 PE=3 SV=1;sp|Q8CFI5|SYPM_MOUSE Probable proline--tRNA ligase, mitochondrial OS=Mus musculus GN=Pars2 PE=2 SV=2;tr|Q3U4M2|Q3U4M2_MOUSE Putative uncharacterized prot	50669000	145560000	54378000	8084000	1634500	4695400	1754100	51299000	144780000	76758000	3	3	3	7	7	7	57.735	0	4.6621	250600000	7	2	3	2	3	2	1	3	2	1	3	2	1
426	A9C491;Q8VE73-3;Q8VE73;E9Q6H4;Q3U270;Q3UMJ6;Q8BUW2;F6Q1R4;Q80TT8-4;Q80TT8	A9C491;Q8VE73-3;Q8VE73	Cullin-7	Cul7	tr|A9C491|A9C491_MOUSE Cullin 7 OS=Mus musculus GN=Cul7 PE=2 SV=1;sp|Q8VE73-3|CUL7_MOUSE Isoform 2 of Cullin-7 OS=Mus musculus GN=Cul7;sp|Q8VE73|CUL7_MOUSE Cullin-7 OS=Mus musculus GN=Cul7 PE=1 SV=2	143070000	197830000	73846000	4147400	1430700	1978300	738460	191890000	232970000	152610000	12	12	10	8.1	8.1	7.1	192.29	0	17.161	414740000	19	7	8	4	7	8	4	7	8	4	5	6	3
427	E9Q553;E9PY81;A9CLV6;Q9QZI8	E9Q553;E9PY81;A9CLV6;Q9QZI8	Serine incorporator 1	Serinc1	tr|E9Q553|E9Q553_MOUSE Serine incorporator 1 OS=Mus musculus GN=Serinc1 PE=4 SV=1;tr|E9PY81|E9PY81_MOUSE Serine incorporator 1 (Fragment) OS=Mus musculus GN=Serinc1 PE=4 SV=1;tr|A9CLV6|A9CLV6_MOUSE Axotomy induced glycoprotein 2 OS=Mus musculus GN=Serinc1	92820000	69106000	58603000	36755000	15470000	11518000	9767200	74404000	88434000	69727000	1	1	1	10.5	10.5	10.5	12.285	0.00047521	2.5615	220530000	5	2	2	1	1	1	1	1	1	1	1	1	1
428	A9UGK3;Q6VN19	A9UGK3;Q6VN19	Ran-binding protein 10	Ranbp10	tr|A9UGK3|A9UGK3_MOUSE RAN binding protein 10 OS=Mus musculus GN=Ranbp10 PE=2 SV=1;sp|Q6VN19|RBP10_MOUSE Ran-binding protein 10 OS=Mus musculus GN=Ranbp10 PE=1 SV=2	138100000	133970000	297420000	23729000	5754300	5582000	12392000	258060000	197430000	244210000	8	6	6	19.2	15.5	15.5	67.188	0	20.341	569490000	13	3	4	6	3	5	6	2	3	5	2	3	5
429	B0FTY3;Q8R1N4;Q8R1N4-3;Q8R1N4-2;B1AS63;Q8R1N4-4	B0FTY3;Q8R1N4;Q8R1N4-3;Q8R1N4-2	NudC domain-containing protein 3	Nudcd3	tr|B0FTY3|B0FTY3_MOUSE NudC domain containing 3, isoform CRA_a OS=Mus musculus GN=Nudcd3 PE=2 SV=1;sp|Q8R1N4|NUDC3_MOUSE NudC domain-containing protein 3 OS=Mus musculus GN=Nudcd3 PE=2 SV=3;sp|Q8R1N4-3|NUDC3_MOUSE Isoform 3 of NudC domain-containing protei	393810000	391010000	362440000	47802000	16409000	16292000	15102000	419920000	478830000	468630000	7	7	7	23.7	23.7	23.7	40.89	0	17.569	1147300000	21	6	8	7	6	6	5	6	6	5	6	6	5
430	B0LAA9	B0LAA9	Phosphoglycerate kinase	Pgk1	tr|B0LAA9|B0LAA9_MOUSE Phosphoglycerate kinase (Fragment) OS=Mus musculus GN=Pgk1 PE=2 SV=1	153810000	122310000	157060000	61883000	21973000	17473000	22437000	171030000	147510000	163660000	8	1	1	71.1	26.3	26.3	8.484	1	-2	433180000	6	2	3	1	8	7	7	1	1	1	1	1	1
431	B0LAC2	B0LAC2		Uba52	tr|B0LAC2|B0LAC2_MOUSE Ubiquitin A-52 residue ribosomal protein fusion product 1 (Fragment) OS=Mus musculus GN=Uba52 PE=2 SV=1	0	0	0	0	0	0	0	0	0	0	6	1	1	57.7	14.1	14.1	8.0381	0.00092894	2.2934	0	1	0	1	0	5	6	5	0	1	0	0	1	0
432	B0LAC4;Q7TPD1-2;Q7TPD1;F6T356;Q7TPD1-3	B0LAC4;Q7TPD1-2;Q7TPD1;F6T356;Q7TPD1-3	F-box only protein 11	Fbxo11	tr|B0LAC4|B0LAC4_MOUSE F-box protein 11 (Fragment) OS=Mus musculus GN=Fbxo11 PE=2 SV=1;sp|Q7TPD1-2|FBX11_MOUSE Isoform 2 of F-box only protein 11 OS=Mus musculus GN=Fbxo11;sp|Q7TPD1|FBX11_MOUSE F-box only protein 11 OS=Mus musculus GN=Fbxo11 PE=2 SV=3;tr|F	9458600	29478000	23262000	5654500	859870	2679900	2114700	24184000	24703000	0	4	4	4	31.5	31.5	31.5	17.102	0.001385	2.1994	62199000	4	1	2	1	1	2	2	1	2	2	1	2	2
433	B0LAE4;Q3TQE3;Q8C1Y9;Q80ZW9;Q3TIC7;Q9JKW0;Q3UBA1;Q3THR3	B0LAE4;Q3TQE3;Q8C1Y9;Q80ZW9;Q3TIC7;Q9JKW0;Q3UBA1;Q3THR3	ADP-ribosylation factor-like protein 6-interacting protein 1	Arl6ip1	tr|B0LAE4|B0LAE4_MOUSE ADP-ribosylation factor-like 6 interacting protein 1 (Fragment) OS=Mus musculus GN=Arl6ip1 PE=2 SV=1;tr|Q3TQE3|Q3TQE3_MOUSE Putative uncharacterized protein (Fragment) OS=Mus musculus GN=Arl6ip1 PE=2 SV=1;tr|Q8C1Y9|Q8C1Y9_MOUSE Putat	1767700000	1792100000	1211300000	795190000	294610000	298680000	201890000	1638700000	1715100000	2228700000	4	4	4	38	38	38	15.907	0	5.4846	4771100000	21	8	9	4	4	3	2	4	3	2	4	3	2
434	B0QZH9;Q8BSN5;Q8BSN5-3;Q8BSN5-2	B0QZH9;Q8BSN5	PHD finger protein 23	Phf23	tr|B0QZH9|B0QZH9_MOUSE PHD finger protein 23 (Fragment) OS=Mus musculus GN=Phf23 PE=4 SV=1;sp|Q8BSN5|PHF23_MOUSE PHD finger protein 23 OS=Mus musculus GN=Phf23 PE=2 SV=2	269170000	132950000	269480000	51662000	20706000	10227000	20729000	210270000	214390000	222970000	3	3	3	30.6	30.6	30.6	20.871	0	13.735	671610000	10	4	2	4	3	2	3	3	2	3	3	2	3
435	Q8CHR4;O35619;B0QZN5;P63044	Q8CHR4;O35619;B0QZN5;P63044	Vesicle-associated membrane protein 2	Vamp2	tr|Q8CHR4|Q8CHR4_MOUSE Vesicle-associated membrane protein 2 OS=Mus musculus GN=Vamp2 PE=2 SV=2;tr|O35619|O35619_MOUSE Vesicle associated membrane protein 2 OS=Mus musculus GN=Vamp2 PE=2 SV=1;tr|B0QZN5|B0QZN5_MOUSE Vesicle-associated membrane protein 2 OS=	189510000	295970000	262010000	149500000	37902000	59195000	52401000	237770000	324050000	272900000	4	2	2	59.5	38.8	38.8	12.691	0	14.219	747490000	10	4	3	3	4	4	4	2	2	2	2	2	2
436	H3BJY1;H3BJ78;H3BKF4;H3BIZ8;B0QZP8;O55101	H3BJY1;H3BJ78;H3BKF4;H3BIZ8;B0QZP8;O55101	Synaptogyrin-2	Syngr2;Gm20708	tr|H3BJY1|H3BJY1_MOUSE Synaptogyrin-2 OS=Mus musculus GN=Syngr2 PE=4 SV=1;tr|H3BJ78|H3BJ78_MOUSE Synaptogyrin-2 (Fragment) OS=Mus musculus GN=Syngr2 PE=4 SV=1;tr|H3BKF4|H3BKF4_MOUSE Protein Gm20708 OS=Mus musculus GN=Gm20708 PE=4 SV=1;tr|H3BIZ8|H3BIZ8_MOUS	106550000	119380000	154730000	126890000	35518000	39794000	51577000	202210000	195900000	261010000	1	1	1	21.7	21.7	21.7	4.6893	0.00047862	2.65	380670000	3	1	1	1	1	1	1	1	1	1	1	1	1
437	B0QZP9;D6RH46;F2Z3V2	B0QZP9;D6RH46;F2Z3V2		Clk4	tr|B0QZP9|B0QZP9_MOUSE Dual-specificity protein kinase CLK4 (Fragment) OS=Mus musculus GN=Clk4 PE=1 SV=1;tr|D6RH46|D6RH46_MOUSE Dual-specificity protein kinase CLK4 OS=Mus musculus GN=Clk4 PE=4 SV=1;tr|F2Z3V2|F2Z3V2_MOUSE Dual-specificity protein kinase CL	0	39351000	114970000	11871000	0	3027000	8843600	0	78599000	80579000	2	2	1	12	12	4.4	21.432	0.0003319	3.1775	154320000	3	0	1	2	0	1	2	0	1	2	0	1	1
438	B0QZT2;Q5SS80-2;Q5SS80	B0QZT2;Q5SS80-2;Q5SS80	Dehydrogenase/reductase SDR family member 13	Dhrs13	tr|B0QZT2|B0QZT2_MOUSE Dehydrogenase/reductase SDR family member 13 OS=Mus musculus GN=Dhrs13 PE=4 SV=1;sp|Q5SS80-2|DHR13_MOUSE Isoform 2 of Dehydrogenase/reductase SDR family member 13 OS=Mus musculus GN=Dhrs13;sp|Q5SS80|DHR13_MOUSE Dehydrogenase/reductas	197960000	226570000	450560000	43754000	9897900	11328000	22528000	255640000	411150000	319400000	5	5	5	32.2	32.2	32.2	35.708	0	11.712	875090000	15	5	5	5	4	3	4	4	3	4	4	3	4
439	F2Z488;C9K0Y5;B0QZW1;G5E863;C9K0Y7;Q9QXM2;Q9QXM4;C9K0Y9;C9K0Y6;Q8C0E4;G5E8H1;C9K0Z0;Q0VGS8;A2VDF5;Q6P9M2;Q7TNB5;C9K0Y4;P23819;Q9Z2W9;Q9Z2W8;P23819-4;P23819-3	F2Z488;C9K0Y5;B0QZW1;G5E863;C9K0Y7;Q9QXM2;Q9QXM4;C9K0Y9;C9K0Y6;Q8C0E4;G5E8H1;C9K0Z0;Q0VGS8;A2VDF5;Q6P9M2;Q7TNB5;C9K0Y4;P23819;Q9Z2W9;Q9Z2W8;P23819-4;P23819-3	Glutamate receptor 2;Glutamate receptor 3;Glutamate receptor 4	Gria3;Gria4;Gria2;Gria1	tr|F2Z488|F2Z488_MOUSE Glutamate receptor 3 OS=Mus musculus GN=Gria3 PE=4 SV=1;tr|C9K0Y5|C9K0Y5_MOUSE AMPA-selective glutamate receptor 3 flop type OS=Mus musculus GN=Gria3 PE=2 SV=1;tr|B0QZW1|B0QZW1_MOUSE Glutamate receptor 3 OS=Mus musculus GN=Gria3 PE=1	9092900	0	0	197670	197670	0	0	15798000	0	0	2	2	2	3.1	3.1	3.1	92.713	0.0090595	1.2037	9092900	3	1	1	1	1	1	1	1	1	1	1	1	1
440	Q8BWQ2;Q8BVY4;B0QZW5;B0QZW4;Q8BU36	Q8BWQ2;Q8BVY4;B0QZW5;B0QZW4;Q8BU36		Supt3	tr|Q8BWQ2|Q8BWQ2_MOUSE Putative uncharacterized protein OS=Mus musculus GN=Supt3 PE=2 SV=1;tr|Q8BVY4|Q8BVY4_MOUSE Protein Supt3 OS=Mus musculus GN=Supt3 PE=1 SV=1;tr|B0QZW5|B0QZW5_MOUSE Protein Supt3 (Fragment) OS=Mus musculus GN=Supt3 PE=4 SV=1;tr|B0QZW4|	14992000	0	34075000	2886300	881880	0	2004400	21470000	0	25066000	2	2	2	10.2	10.2	10.2	41.217	0	4.7654	49067000	3	1	0	2	1	0	2	1	0	2	1	0	2
441	D6REF9;B0R043;Q9CR83	D6REF9;B0R043;Q9CR83	Probable RNA-binding protein 18	Rbm18	tr|D6REF9|D6REF9_MOUSE Probable RNA-binding protein 18 OS=Mus musculus GN=Rbm18 PE=4 SV=1;tr|B0R043|B0R043_MOUSE Probable RNA-binding protein 18 OS=Mus musculus GN=Rbm18 PE=4 SV=1;sp|Q9CR83|RBM18_MOUSE Probable RNA-binding protein 18 OS=Mus musculus GN=Rbm	14409000	0	17084000	5248900	2401500	0	2847400	23167000	0	21681000	1	1	1	26	26	26	8.7489	0.0047114	1.496	31493000	2	1	0	1	1	0	1	1	0	1	1	0	1
442	B0R091;P61022;B0R092	B0R091;P61022	Calcineurin B homologous protein 1	Chp1	tr|B0R091|B0R091_MOUSE Calcineurin B homologous protein 1 OS=Mus musculus GN=Chp1 PE=4 SV=1;sp|P61022|CHP1_MOUSE Calcineurin B homologous protein 1 OS=Mus musculus GN=Chp1 PE=1 SV=2	396200000	389010000	260350000	65348000	24763000	24313000	16272000	547840000	391910000	444780000	7	7	7	49.7	49.7	49.7	21.997	0	25.648	1045600000	17	6	8	3	5	5	3	5	5	3	5	5	3
443	B0R0Y8	B0R0Y8		Sh3kbp1	tr|B0R0Y8|B0R0Y8_MOUSE SH3 domain-containing kinase-binding protein 1 (Fragment) OS=Mus musculus GN=Sh3kbp1 PE=4 SV=1	0	42750000	0	3562500	0	3562500	0	0	48710000	0	11	1	1	71.8	6.7	6.7	22.409	0.0096195	1.1775	42750000	1	0	1	0	5	10	8	0	1	0	0	1	0
444	B0V2M9;Q91VY5-2;Q91VY5;Q8C149;F7BTY2;B0V2M7;Q8BLR3	B0V2M9;Q91VY5-2;Q91VY5;Q8C149;F7BTY2	Lysine-specific demethylase 4B	Kdm4b	tr|B0V2M9|B0V2M9_MOUSE Lysine-specific demethylase 4B OS=Mus musculus GN=Kdm4b PE=4 SV=1;sp|Q91VY5-2|KDM4B_MOUSE Isoform 2 of Lysine-specific demethylase 4B OS=Mus musculus GN=Kdm4b;sp|Q91VY5|KDM4B_MOUSE Lysine-specific demethylase 4B OS=Mus musculus GN=Kd	57294000	49411000	23396000	2768100	1219000	1051300	497780	41017000	47297000	46516000	4	4	4	5	5	5	114.26	0	8.464	130100000	6	2	2	2	3	2	2	3	2	2	3	2	2
445	Q3UNN3;B0V2N1-5;B0V2N1-4;B0V2N1-3;B0V2N1-6;B0V2N1-2;B0V2N1;Q3TP78;Q63847;Q8C922	Q3UNN3;B0V2N1-5;B0V2N1-4;B0V2N1-3;B0V2N1-6;B0V2N1-2;B0V2N1;Q3TP78	Receptor-type tyrosine-protein phosphatase S	Ptprs	tr|Q3UNN3|Q3UNN3_MOUSE Putative uncharacterized protein (Fragment) OS=Mus musculus GN=Ptprs PE=2 SV=1;sp|B0V2N1-5|PTPRS_MOUSE Isoform 5 of Receptor-type tyrosine-protein phosphatase S OS=Mus musculus GN=Ptprs;sp|B0V2N1-4|PTPRS_MOUSE Isoform 4 of Receptor-t	8616200	7073100	25059000	646800	136770	112270	397770	14970000	7374900	0	3	2	1	4.1	3.1	1.8	124.42	0.00016964	3.5809	40749000	2	1	0	1	2	2	2	1	1	1	0	0	1
446	B0V2Q7;Q3UN02;B0V2Q9	B0V2Q7;Q3UN02	Lysocardiolipin acyltransferase 1	Lclat1	tr|B0V2Q7|B0V2Q7_MOUSE Lclat1 protein OS=Mus musculus GN=Lclat1 PE=2 SV=1;sp|Q3UN02|LCLT1_MOUSE Lysocardiolipin acyltransferase 1 OS=Mus musculus GN=Lclat1 PE=2 SV=2	566550000	618510000	665550000	97401000	29819000	32553000	35029000	933810000	931720000	867930000	8	8	8	26.1	26.1	26.1	44.399	0	25.066	1850600000	36	12	13	11	8	7	5	8	7	5	8	7	5
447	B1APX2;Q3UE31;Q69ZV3	B1APX2;Q3UE31;Q69ZV3	Uncharacterized protein KIAA0930 homolog	5031439G07Rik;mKIAA0930	tr|B1APX2|B1APX2_MOUSE Protein 5031439G07Rik OS=Mus musculus GN=5031439G07Rik PE=1 SV=1;sp|Q3UE31|K0930_MOUSE Uncharacterized protein KIAA0930 homolog OS=Mus musculus PE=1 SV=2;tr|Q69ZV3|Q69ZV3_MOUSE MKIAA0930 protein (Fragment) OS=Mus musculus GN=mKIAA093	79657000	31332000	36371000	5081400	2746800	1080400	1254200	68905000	65540000	61866000	3	3	3	7.8	7.8	7.8	50.235	0.0003241	2.8538	147360000	5	2	1	2	2	1	2	2	1	2	2	1	2
448	B1AQF4;Q9D7X3;Q3V2Y9;H3BKD1;H3BKL8	B1AQF4;Q9D7X3;Q3V2Y9;H3BKD1;H3BKL8	Dual specificity protein phosphatase 3	Dusp3	tr|B1AQF4|B1AQF4_MOUSE Dual-specificity protein phosphatase 3 OS=Mus musculus GN=Dusp3 PE=4 SV=1;sp|Q9D7X3|DUS3_MOUSE Dual specificity protein phosphatase 3 OS=Mus musculus GN=Dusp3 PE=1 SV=1;tr|Q3V2Y9|Q3V2Y9_MOUSE Dual-specificity protein phosphatase 3 OS	325540000	510710000	452950000	117200000	29595000	46428000	41177000	610900000	718560000	629220000	5	5	5	31.9	31.9	31.9	23.223	0	12.129	1289200000	14	3	4	7	3	4	4	3	4	4	3	4	4
449	B1AQJ2;B0QZF8;Q8BV95;Q3TMY1	B1AQJ2;B0QZF8	Ubiquitin carboxyl-terminal hydrolase 36	Usp36	sp|B1AQJ2|UBP36_MOUSE Ubiquitin carboxyl-terminal hydrolase 36 OS=Mus musculus GN=Usp36 PE=2 SV=1;tr|B0QZF8|B0QZF8_MOUSE Ubiquitin carboxyl-terminal hydrolase 36 (Fragment) OS=Mus musculus GN=Usp36 PE=4 SV=1	76694000	57463000	87299000	3355400	1162000	870640	1322700	73166000	122350000	74528000	8	8	8	9.7	9.7	9.7	119.91	0	11.71	221460000	12	6	2	4	7	2	3	7	2	3	7	2	3
450	B7ZC46;B1AQY9;B1AQZ0;Q8CHH9;Q8CHH9-2;E0CYM4	B7ZC46;B1AQY9;B1AQZ0;Q8CHH9;Q8CHH9-2	Septin-8	39692	tr|B7ZC46|B7ZC46_MOUSE Septin-8 OS=Mus musculus GN=Sept8 PE=1 SV=1;tr|B1AQY9|B1AQY9_MOUSE Septin-8 OS=Mus musculus GN=Sept8 PE=1 SV=1;tr|B1AQZ0|B1AQZ0_MOUSE Septin-8 OS=Mus musculus GN=Sept8 PE=1 SV=1;sp|Q8CHH9|SEPT8_MOUSE Septin-8 OS=Mus musculus GN=Sept8	2934200000	2239500000	2549900000	308940000	117370000	89580000	101990000	2999200000	2815000000	3147400000	18	14	14	50.2	41.1	41.1	50.895	0	130.07	7723600000	80	27	26	27	18	17	18	14	13	14	14	13	14
451	Q3TET1;Q3UI47;B1AQZ2;P28741;Q3TTS7;Q8CGJ1;Q80UK1;Q3TSP1;B1AQZ5;F6V6Z9	Q3TET1;Q3UI47;B1AQZ2;P28741;Q3TTS7;Q8CGJ1	Kinesin-like protein;Kinesin-like protein KIF3A	Kif3a	tr|Q3TET1|Q3TET1_MOUSE Kinesin-like protein KIF3A OS=Mus musculus GN=Kif3a PE=1 SV=1;tr|Q3UI47|Q3UI47_MOUSE Kinesin family member 3A, isoform CRA_b OS=Mus musculus GN=Kif3a PE=1 SV=1;tr|B1AQZ2|B1AQZ2_MOUSE Kinesin-like protein KIF3A OS=Mus musculus GN=Kif3	588480000	611860000	634630000	42674000	13686000	14229000	14759000	748920000	775050000	661420000	13	11	11	22.6	19.2	19.2	79.444	0	23.125	1835000000	29	10	9	10	10	11	11	8	9	9	8	9	9
452	Z4YKM2;B2RWE3;B3DFI8;B1AR13	Z4YKM2;B2RWE3;B3DFI8;B1AR13	CDGSH iron-sulfur domain-containing protein 3, mitochondrial	Cisd3	tr|Z4YKM2|Z4YKM2_MOUSE CDGSH iron-sulfur domain-containing protein 3, mitochondrial OS=Mus musculus GN=Cisd3 PE=1 SV=1;tr|B2RWE3|B2RWE3_MOUSE CDGSH iron sulfur domain 3 OS=Mus musculus GN=Cisd3 PE=1 SV=1;tr|B3DFI8|B3DFI8_MOUSE Cisd3 protein (Fragment) OS=M	318790000	384070000	510430000	110300000	28981000	34916000	46403000	363570000	566070000	418390000	6	6	6	50.4	50.4	50.4	13.155	0	6.2199	1213300000	25	8	8	9	5	5	6	5	5	6	5	5	6
453	E9Q614;B1AR17;F7C528;Q8BR71;O35327	E9Q614;B1AR17;F7C528		Chd3	tr|E9Q614|E9Q614_MOUSE Protein Chd3 OS=Mus musculus GN=Chd3 PE=4 SV=1;tr|B1AR17|B1AR17_MOUSE Protein Chd3 OS=Mus musculus GN=Chd3 PE=4 SV=1;tr|F7C528|F7C528_MOUSE Protein Chd3 (Fragment) OS=Mus musculus GN=Chd3 PE=4 SV=1	18601000	20127000	83146000	1183200	180590	195410	807250	0	55548000	65345000	18	5	4	9.9	3.9	3.1	228.97	0.00062539	2.4114	121870000	6	2	1	3	13	13	15	2	1	3	2	1	2
454	B1AR48;F8WIE7;Q99L85;J3QN35;J3QJV1	B1AR48;F8WIE7;Q99L85;J3QN35;J3QJV1	Elongator complex protein 5	Elp5	tr|B1AR48|B1AR48_MOUSE Elongator complex protein 5 (Fragment) OS=Mus musculus GN=Elp5 PE=4 SV=1;tr|F8WIE7|F8WIE7_MOUSE Elongator complex protein 5 (Fragment) OS=Mus musculus GN=Elp5 PE=4 SV=2;sp|Q99L85|ELP5_MOUSE Elongator complex protein 5 OS=Mus musculus	66339000	38884000	103930000	26144000	8292300	4860500	12991000	81004000	80967000	88691000	2	2	2	30.4	30.4	30.4	12.822	0	5.6239	209150000	6	1	3	2	1	1	2	1	1	2	1	1	2
455	B1AR50;Q9DCD6	B1AR50;Q9DCD6	Gamma-aminobutyric acid receptor-associated protein	Gabarap	tr|B1AR50|B1AR50_MOUSE Gamma-aminobutyric acid receptor-associated protein OS=Mus musculus GN=Gabarap PE=3 SV=1;sp|Q9DCD6|GBRAP_MOUSE Gamma-aminobutyric acid receptor-associated protein OS=Mus musculus GN=Gabarap PE=1 SV=2	621250000	515200000	419490000	194490000	77656000	64400000	52436000	678050000	771450000	389120000	3	1	1	20.8	10.4	10.4	12.195	0.00016855	3.4457	1555900000	13	5	4	4	2	3	3	1	1	1	1	1	1
456	Q80VZ9;B1AR92;Q3UUJ4-2;Q3UUJ4-3;Q3UUJ4	Q80VZ9;B1AR92;Q3UUJ4-2;Q3UUJ4-3;Q3UUJ4	STE20-related kinase adapter protein alpha	Strada	tr|Q80VZ9|Q80VZ9_MOUSE 2610019A05Rik protein OS=Mus musculus GN=Strada PE=2 SV=1;tr|B1AR92|B1AR92_MOUSE STE20-related kinase adapter protein alpha (Fragment) OS=Mus musculus GN=Strada PE=4 SV=2;sp|Q3UUJ4-2|STRAA_MOUSE Isoform 2 of STE20-related kinase adap	55835000	0	0	9305900	9305900	0	0	57030000	0	0	1	1	1	21.6	21.6	21.6	11.502	0.00033484	3.2997	55835000	1	1	0	0	1	0	0	1	0	0	1	0	0
457	B1ARA3;Q4FZH2;P61255;Q3U7N1;B1ARA5	B1ARA3;Q4FZH2;P61255;Q3U7N1;B1ARA5	60S ribosomal protein L26	Rpl26	tr|B1ARA3|B1ARA3_MOUSE 60S ribosomal protein L26 (Fragment) OS=Mus musculus GN=Rpl26 PE=4 SV=1;tr|Q4FZH2|Q4FZH2_MOUSE MCG50660, isoform CRA_a OS=Mus musculus GN=Rpl26 PE=2 SV=1;sp|P61255|RL26_MOUSE 60S ribosomal protein L26 OS=Mus musculus GN=Rpl26 PE=1 SV	9449200000	8366000000	9619600000	3429400000	1181200000	1045800000	1202400000	9866700000	10862000000	9629200000	11	11	10	64.1	64.1	58.3	12.217	0	27.541	27435000000	210	70	71	69	11	10	10	11	10	10	10	10	10
458	B1ARC2;Q8BWY7-3;Q8BWY7;Q8BWY7-2	B1ARC2;Q8BWY7-3;Q8BWY7;Q8BWY7-2	Zinc transporter ZIP11	Slc39a11	tr|B1ARC2|B1ARC2_MOUSE Zinc transporter ZIP11 (Fragment) OS=Mus musculus GN=Slc39a11 PE=4 SV=1;sp|Q8BWY7-3|S39AB_MOUSE Isoform 3 of Zinc transporter ZIP11 OS=Mus musculus GN=Slc39a11;sp|Q8BWY7|S39AB_MOUSE Zinc transporter ZIP11 OS=Mus musculus GN=Slc39a11	45058000	28657000	29156000	25718000	11264000	7164300	7289000	55191000	37751000	33781000	1	1	1	14.5	14.5	14.5	21.025	0.0018276	2.0698	102870000	3	1	1	1	1	1	1	1	1	1	1	1	1
459	Q7TME9;B1ARD6;Q8CB82;Q7TME8;Q80VG8;Q8C7F7;Q7TMF0;Q3UBN9;Q7TMF1;B1ARD8;Q8R3R7;F6RTS1;E9Q0R4	Q7TME9;B1ARD6;Q8CB82;Q7TME8;Q80VG8;Q8C7F7		Slfn9	tr|Q7TME9|Q7TME9_MOUSE Schlafen 9 OS=Mus musculus GN=Slfn9 PE=2 SV=1;tr|B1ARD6|B1ARD6_MOUSE Protein Slfn9 OS=Mus musculus GN=Slfn9 PE=4 SV=1;tr|Q8CB82|Q8CB82_MOUSE Putative uncharacterized protein OS=Mus musculus GN=Slfn9 PE=2 SV=1;tr|Q7TME8|Q7TME8_MOUSE S	1802100000	1874300000	2219500000	101650000	31070000	32316000	38267000	2515800000	2470300000	2818300000	30	30	30	40.5	40.5	40.5	103.94	0	74.295	5895900000	91	33	29	29	25	22	23	25	22	23	25	22	23
460	B1ART1;B1ART2;V9GX23	B1ART1;B1ART2;V9GX23		Vps13d	tr|B1ART1|B1ART1_MOUSE Protein Vps13d OS=Mus musculus GN=Vps13d PE=1 SV=1;tr|B1ART2|B1ART2_MOUSE Protein Vps13d OS=Mus musculus GN=Vps13d PE=1 SV=2;tr|V9GX23|V9GX23_MOUSE Protein Vps13d (Fragment) OS=Mus musculus GN=Vps13d PE=1 SV=1	0	37100000	0	143240	0	143240	0	0	50439000	0	2	2	2	0.4	0.4	0.4	487.32	1	-2	37100000	1	0	1	0	1	2	0	1	2	0	1	2	0
461	B1ARU4;E9PVY8;E9QA63;Q9QXZ0;E9QNP1;Q9QXZ0-2;Q9QXZ0-4;F6Q750;Q5DTZ2;F6SHS0;Q80TZ5;Q8C8N4;Q4QQN2;Q80ZZ3;F6YKN8;F6RCJ3;Q9CYG3;F6RL59;Q3V3W8;Q8C221	B1ARU4;E9PVY8;E9QA63;Q9QXZ0;E9QNP1;Q9QXZ0-2;Q9QXZ0-4;F6Q750	Microtubule-actin cross-linking factor 1	Macf1	tr|B1ARU4|B1ARU4_MOUSE Microtubule-actin cross-linking factor 1 OS=Mus musculus GN=Macf1 PE=1 SV=1;tr|E9PVY8|E9PVY8_MOUSE Microtubule-actin cross-linking factor 1 OS=Mus musculus GN=Macf1 PE=1 SV=2;tr|E9QA63|E9QA63_MOUSE Microtubule-actin cross-linking fac	6206400000	5395900000	6350800000	37876000	13094000	11384000	13398000	6947300000	7344200000	6861500000	153	152	0	29.4	29.3	0	831.64	0	323.31	17953000000	383	131	124	128	114	103	112	113	102	111	0	0	0
462	B1ARW4;Q99LY9	B1ARW4;Q99LY9	NADH dehydrogenase [ubiquinone] iron-sulfur protein 5;NADH dehydrogenase [ubiquinone] iron-sulfur protein 5, N-terminally processed	Ndufs5	tr|B1ARW4|B1ARW4_MOUSE NADH dehydrogenase [ubiquinone] iron-sulfur protein 5 (Fragment) OS=Mus musculus GN=Ndufs5 PE=4 SV=1;sp|Q99LY9|NDUS5_MOUSE NADH dehydrogenase [ubiquinone] iron-sulfur protein 5 OS=Mus musculus GN=Ndufs5 PE=1 SV=3	38969000	42866000	33304000	19190000	6494900	7144300	5550700	50260000	47106000	29135000	3	3	3	35.2	35.2	35.2	10.909	0.00016781	3.3531	115140000	5	1	2	2	1	2	3	1	2	3	1	2	3
463	B1AS37;Q9D032-2;Q9D032;B1AS34;Q8R051;Q8BYA8;Q8BMY2;Q3U5B9;Q99LZ8;Q3U4B1	B1AS37;Q9D032-2;Q9D032;B1AS34	Single-stranded DNA-binding protein 3	Ssbp3	tr|B1AS37|B1AS37_MOUSE Single-stranded DNA-binding protein 3 OS=Mus musculus GN=Ssbp3 PE=1 SV=1;sp|Q9D032-2|SSBP3_MOUSE Isoform 2 of Single-stranded DNA-binding protein 3 OS=Mus musculus GN=Ssbp3;sp|Q9D032|SSBP3_MOUSE Single-stranded DNA-binding protein 3	160590000	110870000	114690000	38615000	16059000	11087000	11469000	181060000	137070000	178910000	3	3	2	10.3	10.3	7.6	38.209	0	7.0015	386150000	10	5	4	1	3	3	2	3	3	2	2	2	1
464	B1AS67;Q66T02-2;Q66T02	B1AS67;Q66T02-2;Q66T02	Pleckstrin homology domain-containing family G member 5	Plekhg5	tr|B1AS67|B1AS67_MOUSE Pleckstrin homology domain-containing family G member 5 OS=Mus musculus GN=Plekhg5 PE=1 SV=1;sp|Q66T02-2|PKHG5_MOUSE Isoform 2 of Pleckstrin homology domain-containing family G member 5 OS=Mus musculus GN=Plekhg5;sp|Q66T02|PKHG5_MOUS	97882000	148720000	82970000	5782000	1717200	2609100	1455600	134060000	138110000	146810000	6	6	6	6.9	6.9	6.9	117.84	0	10.017	329570000	14	6	5	3	4	5	3	4	5	3	4	5	3
465	B1ASA5;E9QA68	B1ASA5		Zfp362	tr|B1ASA5|B1ASA5_MOUSE Protein Zfp362 OS=Mus musculus GN=Zfp362 PE=2 SV=1	42858000	73326000	86201000	7784000	1648400	2820200	3315400	76277000	74923000	80840000	3	3	2	9.8	9.8	7.4	45.672	0	4.8696	202380000	7	2	2	3	1	2	3	1	2	3	0	1	2
466	Q3URA1;B7ZN32;B1ASD1;P23607;P17012;Q99NJ4;H6U8U5	Q3URA1;B7ZN32;B1ASD1;P23607;P17012	Zinc finger autosomal protein;Zinc finger X-chromosomal protein	Zfx;Zfa	tr|Q3URA1|Q3URA1_MOUSE Putative uncharacterized protein (Fragment) OS=Mus musculus GN=Zfx PE=2 SV=1;tr|B7ZN32|B7ZN32_MOUSE Zfx protein OS=Mus musculus GN=Zfx PE=2 SV=1;tr|B1ASD1|B1ASD1_MOUSE Zinc finger protein X-linked OS=Mus musculus GN=Zfx PE=2 SV=1;sp|	0	64123000	108110000	6889400	0	2564900	4324400	0	84664000	96189000	5	5	5	16.7	16.7	16.7	42.925	0	7.5069	172230000	8	0	3	5	0	3	4	0	3	4	0	3	4
467	B1ASK8;Q6P073;B0QZM2;B0QZM1	B1ASK8;Q6P073;B0QZM2	Ubiquitin-conjugating enzyme E2 J2	Ube2j2	tr|B1ASK8|B1ASK8_MOUSE Ubiquitin-conjugating enzyme E2 J2 OS=Mus musculus GN=Ube2j2 PE=4 SV=1;sp|Q6P073|UB2J2_MOUSE Ubiquitin-conjugating enzyme E2 J2 OS=Mus musculus GN=Ube2j2 PE=1 SV=1;tr|B0QZM2|B0QZM2_MOUSE Ubiquitin-conjugating enzyme E2 J2 (Fragment)	73135000	44573000	78332000	15080000	5625800	3428700	6025500	82283000	102770000	84768000	4	4	4	24.7	24.7	24.7	30.292	0	7.8758	196040000	7	3	1	3	3	2	3	3	2	3	3	2	3
468	Q3URU8;B1ASP2;Q3U8P8;P52332;Q8K0I7;Q3UZ30;Q8CFX4;Q3TI10	Q3URU8;B1ASP2;Q3U8P8;P52332;Q8K0I7	Tyrosine-protein kinase;Tyrosine-protein kinase JAK1	Jak1	tr|Q3URU8|Q3URU8_MOUSE Tyrosine-protein kinase OS=Mus musculus GN=Jak1 PE=2 SV=1;tr|B1ASP2|B1ASP2_MOUSE Tyrosine-protein kinase OS=Mus musculus GN=Jak1 PE=3 SV=1;tr|Q3U8P8|Q3U8P8_MOUSE Tyrosine-protein kinase OS=Mus musculus GN=Jak1 PE=2 SV=1;sp|P52332|JAK	124610000	198070000	256540000	8044700	1730700	2750900	3563000	208280000	209360000	262810000	13	13	13	15.7	15.7	15.7	133.29	0	27.25	579220000	22	8	6	8	8	6	9	8	6	9	8	6	9
469	Q9D186;Q3KNM9;B1ASQ2;Q9DCZ4	Q9D186;Q3KNM9;B1ASQ2;Q9DCZ4	Apolipoprotein O	Apoo	tr|Q9D186|Q9D186_MOUSE Apolipoprotein O OS=Mus musculus GN=Apoo PE=2 SV=1;tr|Q3KNM9|Q3KNM9_MOUSE Apoo protein OS=Mus musculus GN=Apoo PE=2 SV=1;tr|B1ASQ2|B1ASQ2_MOUSE Apolipoprotein O OS=Mus musculus GN=Apoo PE=4 SV=1;sp|Q9DCZ4|APOO_MOUSE Apolipoprotein O	1664500000	1452400000	1661700000	477850000	166450000	145240000	166170000	1995200000	1661800000	1696700000	6	6	6	47.6	47.6	47.6	18.798	0	38.051	4778500000	37	12	11	14	6	6	6	6	6	6	6	6	6
470	B1AST8;B1AST7;E9QLW6;E9Q1Q1;Q60592;Q9DBV8;Q3URY8;E9Q6Q5;E9Q6G0;E9Q4Q9;E9Q1M8;Q811L6-2;Q9R1L5	B1AST8;B1AST7;E9QLW6;E9Q1Q1;Q60592	Microtubule-associated serine/threonine-protein kinase 2	Mast2	tr|B1AST8|B1AST8_MOUSE Microtubule associated serine/threonine kinase 2, isoform CRA_b OS=Mus musculus GN=Mast2 PE=1 SV=1;tr|B1AST7|B1AST7_MOUSE Microtubule-associated serine/threonine-protein kinase 2 OS=Mus musculus GN=Mast2 PE=1 SV=1;tr|E9QLW6|E9QLW6_MO	46422000	21602000	15726000	854590	473700	220430	160460	37134000	40210000	0	7	6	5	5.9	5.5	4.6	190.36	0	4.2213	83750000	6	2	3	1	4	4	2	3	3	1	2	3	1
471	B1ASU9;O55047;P70320;B7ZC85;Q6NZC4;O55047-3;O55047-2;F6XSD0	B1ASU9;O55047;P70320;B7ZC85;Q6NZC4;O55047-3;O55047-2	Serine/threonine-protein kinase tousled-like 2	Tlk2	tr|B1ASU9|B1ASU9_MOUSE Serine/threonine-protein kinase tousled-like 2 OS=Mus musculus GN=Tlk2 PE=4 SV=1;sp|O55047|TLK2_MOUSE Serine/threonine-protein kinase tousled-like 2 OS=Mus musculus GN=Tlk2 PE=1 SV=2;tr|P70320|P70320_MOUSE Tousled-like kinase OS=Mus	18975000	53546000	58692000	2982100	431240	1217000	1333900	41770000	52784000	46561000	4	2	2	8.3	4	4	85.341	0.0022662	1.9194	131210000	5	1	2	2	3	4	4	1	2	2	1	2	2
472	B1ASW5;Q14BF8;Q5NCF2;B1ASW6	B1ASW5;Q14BF8;Q5NCF2;B1ASW6	Trafficking protein particle complex subunit 1	Trappc1	tr|B1ASW5|B1ASW5_MOUSE Trafficking protein particle complex 1, isoform CRA_a OS=Mus musculus GN=Trappc1 PE=4 SV=1;tr|Q14BF8|Q14BF8_MOUSE Trafficking protein particle complex 1, isoform CRA_b OS=Mus musculus GN=Trappc1 PE=2 SV=1;sp|Q5NCF2|TPPC1_MOUSE Traffi	212550000	250550000	163850000	56996000	19323000	22778000	14896000	239260000	244770000	227440000	4	4	4	37	37	37	15.752	0	35.332	626960000	9	5	3	1	3	3	2	3	3	2	3	3	2
473	B1AT82;Q9D0M1;Q8BK29;B1AT84;B1AT83	B1AT82;Q9D0M1;Q8BK29;B1AT84	Phosphoribosyl pyrophosphate synthase-associated protein 1	Prpsap1	tr|B1AT82|B1AT82_MOUSE MCG6846, isoform CRA_c OS=Mus musculus GN=Prpsap1 PE=1 SV=1;sp|Q9D0M1|KPRA_MOUSE Phosphoribosyl pyrophosphate synthase-associated protein 1 OS=Mus musculus GN=Prpsap1 PE=1 SV=1;tr|Q8BK29|Q8BK29_MOUSE Putative uncharacterized protein	828740000	1159400000	1502900000	134270000	31874000	44593000	57803000	1316400000	1286300000	1594300000	12	11	11	44.7	41	41	42.467	0	53.028	3491000000	43	13	14	16	10	11	12	9	10	11	9	10	11
474	B1AT92;B1AT95	B1AT92		Grb2	tr|B1AT92|B1AT92_MOUSE Growth factor receptor-bound protein 2 OS=Mus musculus GN=Grb2 PE=4 SV=1	769370000	721280000	721390000	116420000	40493000	37962000	37968000	911390000	922250000	784330000	10	10	1	53.7	53.7	7.4	23.587	0	12.757	2212000000	27	10	8	9	7	6	7	7	6	7	0	0	1
475	Q66I45;B1ATD5;R4GML8;Q8K296;B1ATD4;M0QW74;Q8K296-2;Q8R0N4;Q9CVQ1;Q80U24	Q66I45;B1ATD5;R4GML8;Q8K296;B1ATD4;M0QW74;Q8K296-2	Myotubularin-related protein 3	Mtmr3	tr|Q66I45|Q66I45_MOUSE Mtmr3 protein OS=Mus musculus GN=Mtmr3 PE=2 SV=1;tr|B1ATD5|B1ATD5_MOUSE MCG9626, isoform CRA_b OS=Mus musculus GN=Mtmr3 PE=1 SV=1;tr|R4GML8|R4GML8_MOUSE Myotubularin-related protein 3 (Fragment) OS=Mus musculus GN=Mtmr3 PE=1 SV=1;sp|	146170000	226230000	357840000	10432000	2088200	3231900	5112000	293440000	280700000	302210000	11	11	9	13.8	13.8	12.4	129.61	0	19.967	730250000	29	7	11	11	6	9	9	6	9	9	5	7	7
476	Q8C3C9;B1AV77;B1ATI0;P47740;Q3U7B5;Q99PH3;Q8BQ93;Q99PH4;Q8C5J1;REV__Q9DAH1;REV__Q7TT52-2;REV__F6VUT6	Q8C3C9;B1AV77;B1ATI0;P47740;Q3U7B5;Q99PH3;Q8BQ93;Q99PH4;Q8C5J1	Aldehyde dehydrogenase;Fatty aldehyde dehydrogenase	Aldh3a2	tr|Q8C3C9|Q8C3C9_MOUSE Aldehyde dehydrogenase OS=Mus musculus GN=Aldh3a2 PE=2 SV=1;tr|B1AV77|B1AV77_MOUSE Aldehyde dehydrogenase OS=Mus musculus GN=Aldh3a2 PE=3 SV=1;tr|B1ATI0|B1ATI0_MOUSE Aldehyde dehydrogenase OS=Mus musculus GN=Aldh3a2 PE=3 SV=1;sp|P477	1377900000	1167400000	1027100000	162380000	62633000	53062000	46685000	1639900000	1540700000	1294100000	14	13	13	47.3	44.8	44.8	53.998	0	36.742	3572400000	45	14	14	17	10	9	13	10	9	12	10	9	12
477	B1ATP7;Q3U0M8;Q80Y81-2;Q80Y81;B1ATP9	B1ATP7;Q3U0M8;Q80Y81-2;Q80Y81	Zinc phosphodiesterase ELAC protein 2	Elac2	tr|B1ATP7|B1ATP7_MOUSE Zinc phosphodiesterase ELAC protein 2 OS=Mus musculus GN=Elac2 PE=1 SV=1;tr|Q3U0M8|Q3U0M8_MOUSE Putative uncharacterized protein OS=Mus musculus GN=Elac2 PE=2 SV=1;sp|Q80Y81-2|RNZ2_MOUSE Isoform 2 of Zinc phosphodiesterase ELAC prote	1199800000	1037900000	1555900000	75871000	23995000	20757000	31118000	1455100000	1565000000	1786800000	18	18	18	30.7	30.7	30.7	91.946	0	73.293	3793500000	66	23	21	22	15	14	17	15	14	17	15	14	17
478	B1ATV0;Q8CI67;Q3UL16;Q9WVD4;Q8C6W8;B1ATV1;Q8BQG0	B1ATV0;Q8CI67;Q3UL16;Q9WVD4	Chloride channel protein;H(+)/Cl(-) exchange transporter 5	Clcn5	tr|B1ATV0|B1ATV0_MOUSE H(+)/Cl(-) exchange transporter 5 OS=Mus musculus GN=Clcn5 PE=4 SV=1;tr|Q8CI67|Q8CI67_MOUSE Chloride channel 5 OS=Mus musculus GN=Clcn5 PE=2 SV=1;tr|Q3UL16|Q3UL16_MOUSE Putative uncharacterized protein OS=Mus musculus GN=Clcn5 PE=2 S	308150000	195880000	276830000	22310000	8804200	5596600	7909600	355440000	312010000	311820000	9	9	7	16.3	16.3	14.3	90.705	0	10.283	780860000	26	8	9	9	7	7	6	7	7	6	5	5	4
479	B1ATZ0;B1ATZ1;Q3TLL4;Q3UMA3;Q99LI8;B1ATY9;F6VV02	B1ATZ0;B1ATZ1;Q3TLL4;Q3UMA3;Q99LI8;B1ATY9	Hepatocyte growth factor-regulated tyrosine kinase substrate	Hgs	tr|B1ATZ0|B1ATZ0_MOUSE Hepatocyte growth factor-regulated tyrosine kinase substrate OS=Mus musculus GN=Hgs PE=1 SV=1;tr|B1ATZ1|B1ATZ1_MOUSE Hepatocyte growth factor-regulated tyrosine kinase substrate OS=Mus musculus GN=Hgs PE=1 SV=1;tr|Q3TLL4|Q3TLL4_MOUSE	2322400000	2668900000	2694900000	187470000	56644000	65096000	65728000	2562600000	2934300000	2951200000	17	17	17	24.2	24.2	24.2	85.778	0	38.572	7686200000	55	15	19	21	14	13	14	14	13	14	14	13	14
480	B1AU25;Q9Z0X1;Q1L6K5;Q2QKE3	B1AU25;Q9Z0X1	Apoptosis-inducing factor 1, mitochondrial	Aifm1	tr|B1AU25|B1AU25_MOUSE Apoptosis-inducing factor 1, mitochondrial OS=Mus musculus GN=Aifm1 PE=1 SV=1;sp|Q9Z0X1|AIFM1_MOUSE Apoptosis-inducing factor 1, mitochondrial OS=Mus musculus GN=Aifm1 PE=1 SV=1	7034500000	6061300000	9109100000	672880000	213170000	183680000	276030000	7421600000	8173200000	8432900000	20	20	20	44.7	44.7	44.7	66.113	0	144.99	22205000000	137	44	49	44	20	20	19	20	20	19	20	20	19
481	B1AU74;Q9CWP6;Q9CWP6-2;Q9CWP6-3;Q3U0U1;Q9CWP6-4	B1AU74;Q9CWP6;Q9CWP6-2;Q9CWP6-3	Motile sperm domain-containing protein 2	Mospd2	tr|B1AU74|B1AU74_MOUSE Motile sperm domain-containing protein 2 OS=Mus musculus GN=Mospd2 PE=4 SV=1;sp|Q9CWP6|MSPD2_MOUSE Motile sperm domain-containing protein 2 OS=Mus musculus GN=Mospd2 PE=1 SV=2;sp|Q9CWP6-2|MSPD2_MOUSE Isoform 2 of Motile sperm domain-	413300000	396560000	778770000	49645000	12915000	12393000	24337000	602610000	565600000	644700000	10	10	10	20.1	20.1	20.1	59.81	0	22.957	1588600000	19	6	4	9	5	4	9	5	4	9	5	4	9
482	B1AU75;Q99MD9;B1AU76;Q99MD9-2;Q3TTH5	B1AU75;Q99MD9;B1AU76;Q99MD9-2	Nuclear autoantigenic sperm protein	Nasp	tr|B1AU75|B1AU75_MOUSE Nuclear autoantigenic sperm protein OS=Mus musculus GN=Nasp PE=1 SV=1;sp|Q99MD9|NASP_MOUSE Nuclear autoantigenic sperm protein OS=Mus musculus GN=Nasp PE=1 SV=2;tr|B1AU76|B1AU76_MOUSE Nuclear autoantigenic sperm protein OS=Mus muscul	5066500000	4156900000	4502900000	319220000	117830000	96671000	104720000	4940100000	5447400000	4509100000	33	33	33	52.1	52.1	52.1	84.012	0	197.45	13726000000	133	46	44	43	30	29	28	30	29	28	30	29	28
483	B1AUE5	B1AUE5	Peroxisome biogenesis factor 10	Pex10	sp|B1AUE5|PEX10_MOUSE Peroxisome biogenesis factor 10 OS=Mus musculus GN=Pex10 PE=2 SV=1	13225000	49869000	15566000	4627000	777920	2933500	915620	0	62242000	0	2	2	2	8.6	8.6	8.6	37.157	0.00032404	2.8536	78659000	1	0	1	0	1	1	1	1	1	1	1	1	1
484	B1AUN3;Q3UKV0;B1AUN2;A4FUS0;A0AUM9;Q3T9T4	B1AUN3;Q3UKV0;B1AUN2;A4FUS0;A0AUM9;Q3T9T4		Eif2b3	tr|B1AUN3|B1AUN3_MOUSE Protein Eif2b3 OS=Mus musculus GN=Eif2b3 PE=4 SV=1;tr|Q3UKV0|Q3UKV0_MOUSE Protein Eif2b3 OS=Mus musculus GN=Eif2b3 PE=2 SV=1;tr|B1AUN2|B1AUN2_MOUSE MCG14442 OS=Mus musculus GN=Eif2b3 PE=4 SV=1;tr|A4FUS0|A4FUS0_MOUSE Eif2b3 protein OS	726510000	518350000	549110000	64071000	25947000	18513000	19611000	765660000	788510000	754890000	17	17	17	48.4	48.4	48.4	45.065	0	39.504	1794000000	45	17	14	14	14	11	10	14	11	10	14	11	10
485	B1AUQ7;Z4YJH1;Q9R1K9;Q8K4K1-3;Q8K4K1;P41209	B1AUQ7;Z4YJH1;Q9R1K9	Centrin-2	Cetn2	tr|B1AUQ7|B1AUQ7_MOUSE Centrin-2 (Fragment) OS=Mus musculus GN=Cetn2 PE=4 SV=1;tr|Z4YJH1|Z4YJH1_MOUSE Centrin-2 OS=Mus musculus GN=Cetn2 PE=4 SV=1;sp|Q9R1K9|CETN2_MOUSE Centrin-2 OS=Mus musculus GN=Cetn2 PE=2 SV=1	152860000	165470000	232210000	78649000	21838000	23639000	33173000	154990000	174210000	203580000	6	6	5	66.7	66.7	60.4	12.715	0	11.245	550550000	12	3	5	4	3	4	4	3	4	4	3	3	3
486	G3UXR9;G8JL47;B1AUR6-2;B1AUR6;G3UYM2	G3UXR9;G8JL47;B1AUR6-2;B1AUR6;G3UYM2	Protein MMS22-like	Mms22l	tr|G3UXR9|G3UXR9_MOUSE Protein MMS22-like (Fragment) OS=Mus musculus GN=Mms22l PE=4 SV=1;tr|G8JL47|G8JL47_MOUSE Protein MMS22-like OS=Mus musculus GN=Mms22l PE=4 SV=1;sp|B1AUR6-2|MMS22_MOUSE Isoform 2 of Protein MMS22-like OS=Mus musculus GN=Mms22l;sp|B1AU	11698000	7624400	18486000	900190	278510	181530	440140	14221000	12434000	18736000	2	2	2	2.9	2.9	2.9	83.803	0.0048408	1.4507	37808000	3	0	0	3	1	1	2	1	1	2	1	1	2
487	F6THK7;B1AUW8;B1AUW9;Q540G0;Q8BR10;Q99J34;B1AUW6;Q62406;Q62406-2;Q8K4N6;Q8K4N7;F7CUT1;F6TQF4;Q8K4N8	F6THK7;B1AUW8;B1AUW9;Q540G0;Q8BR10;Q99J34;B1AUW6;Q62406;Q62406-2;Q8K4N6;Q8K4N7;F7CUT1;F6TQF4;Q8K4N8	Interleukin-1 receptor-associated kinase 1	Irak1;IRAK1b;IRAK1a	tr|F6THK7|F6THK7_MOUSE Interleukin-1 receptor-associated kinase 1 (Fragment) OS=Mus musculus GN=Irak1 PE=4 SV=1;tr|B1AUW8|B1AUW8_MOUSE Interleukin-1 receptor-associated kinase 1 OS=Mus musculus GN=Irak1 PE=3 SV=1;tr|B1AUW9|B1AUW9_MOUSE Interleukin-1 recept	0	7497200	6187800	855320	0	468580	386740	0	10193000	7852600	2	2	2	6	6	6	41.82	0.0016781	2.0869	13685000	1	0	1	0	0	2	1	0	2	1	0	2	1
488	B1AUY7;Q540H0;Q9QY36;B1AUY8;Q684Q8	B1AUY7;Q540H0;Q9QY36;B1AUY8;Q684Q8	N-alpha-acetyltransferase 10	Naa10	tr|B1AUY7|B1AUY7_MOUSE N-alpha-acetyltransferase 10 OS=Mus musculus GN=Naa10 PE=4 SV=1;tr|Q540H0|Q540H0_MOUSE N-acetyltransferase ARD1 homolog (S. cerevisiae), isoform CRA_e OS=Mus musculus GN=Naa10 PE=2 SV=1;sp|Q9QY36|NAA10_MOUSE N-alpha-acetyltransferase	1081800000	856940000	1031500000	185640000	67612000	53559000	64467000	940190000	1185500000	1014000000	12	12	4	67.8	67.8	15.5	26.318	0	66.871	2970200000	36	12	9	15	10	9	10	10	9	10	3	3	3
489	B1AV39;Q6IE82	B1AV39;Q6IE82	Protein Jade-3	Jade3	tr|B1AV39|B1AV39_MOUSE Protein Jade-3 OS=Mus musculus GN=Jade3 PE=1 SV=1;sp|Q6IE82|JADE3_MOUSE Protein Jade-3 OS=Mus musculus GN=Jade3 PE=1 SV=1	242690000	322510000	118860000	14555000	5163600	6861900	2529000	375680000	406040000	172190000	7	7	6	13.2	13.2	11.5	93.585	0	9.3151	684060000	13	4	6	3	3	6	3	3	6	3	2	5	3
490	B1AV66;Q8BR70	B1AV66;Q8BR70	Protein YIPF;Protein YIPF6	Yipf6	tr|B1AV66|B1AV66_MOUSE Protein YIPF6 (Fragment) OS=Mus musculus GN=Yipf6 PE=4 SV=1;sp|Q8BR70|YIPF6_MOUSE Protein YIPF6 OS=Mus musculus GN=Yipf6 PE=2 SV=1	130100000	133870000	107310000	33753000	11827000	12170000	9755500	130100000	139580000	104030000	1	1	1	7.1	7.1	7.1	21.781	0	12.773	371280000	3	1	1	1	1	1	1	1	1	1	1	1	1
491	B1AV75;Q3UJP5	B1AV75;Q3UJP5	Protein C8orf37 homolog	2610301B20Rik	tr|B1AV75|B1AV75_MOUSE Protein 2610301B20Rik OS=Mus musculus GN=2610301B20Rik PE=4 SV=1;sp|Q3UJP5|CH037_MOUSE Protein C8orf37 homolog OS=Mus musculus PE=1 SV=1	20723000	16154000	22969000	3989800	1381500	1076900	1531300	26819000	11729000	28453000	1	1	1	7.1	7.1	7.1	23.935	0.00093502	2.3671	59847000	3	1	1	1	1	1	1	1	1	1	1	1	1
492	B1AVH5;Q3U4G8;B1AVH4;Q8C0P5;Q8BLN0;Q8R0L6;Q3U8R5;Q6NVB7	B1AVH5;Q3U4G8;B1AVH4;Q8C0P5;Q8BLN0	Coronin;Coronin-2A	Coro2a	tr|B1AVH5|B1AVH5_MOUSE Coronin OS=Mus musculus GN=Coro2a PE=3 SV=1;tr|Q3U4G8|Q3U4G8_MOUSE Coronin OS=Mus musculus GN=Coro2a PE=2 SV=1;tr|B1AVH4|B1AVH4_MOUSE Coronin OS=Mus musculus GN=Coro2a PE=2 SV=1;sp|Q8C0P5|COR2A_MOUSE Coronin-2A OS=Mus musculus GN=Cor	42594000	84649000	121070000	6897500	1183200	2351400	3363000	94132000	86114000	93844000	9	9	8	16.4	16.4	15.1	61.708	0	8.1167	248310000	17	3	7	7	3	7	6	3	7	6	2	6	5
493	B1AVU1;Q3UDT1;Q922R0	B1AVU1;Q3UDT1;Q922R0	cAMP-dependent protein kinase catalytic subunit PRKX	Prkx	tr|B1AVU1|B1AVU1_MOUSE cAMP-dependent protein kinase catalytic subunit PRKX OS=Mus musculus GN=Prkx PE=1 SV=1;tr|Q3UDT1|Q3UDT1_MOUSE Putative uncharacterized protein OS=Mus musculus GN=Prkx PE=2 SV=1;sp|Q922R0|PRKX_MOUSE cAMP-dependent protein kinase catal	68822000	15602000	0	5628300	4588100	1040200	0	80208000	22261000	0	1	1	1	8.9	8.9	8.9	26.679	0.00092851	2.2897	84425000	2	1	1	0	1	1	0	1	1	0	1	1	0
494	E7FLY0;B1AVY7	E7FLY0;B1AVY7	Kinesin-like protein;Kinesin-like protein KIF16B	Kif16b	tr|E7FLY0|E7FLY0_MOUSE Kinesin superfamily protein 16B OS=Mus musculus GN=Kif16b PE=2 SV=1;sp|B1AVY7|KI16B_MOUSE Kinesin-like protein KIF16B OS=Mus musculus GN=Kif16b PE=1 SV=1	403710000	12480000	17883000	5293500	4923200	152200	218080	167180000	164310000	192750000	3	2	2	3	2.3	2.3	151.29	0.0083876	1.2714	434070000	4	2	1	1	3	2	2	2	1	1	2	1	1
495	B1AVZ0	B1AVZ0	Uracil phosphoribosyltransferase homolog	Uprt	sp|B1AVZ0|UPP_MOUSE Uracil phosphoribosyltransferase homolog OS=Mus musculus GN=Uprt PE=2 SV=1	433850000	365460000	366890000	64789000	24103000	20303000	20383000	435190000	463340000	483660000	9	9	9	39.7	39.7	39.7	34.278	0	21.466	1166200000	15	4	6	5	5	7	6	5	7	6	5	7	6
496	B1AW21;Q3TLK7;Q9D4L1;Q9Z2C5;Q8CD00;Q8CCE6;Q3UDN6;Q5DTJ6	B1AW21;Q3TLK7;Q9D4L1;Q9Z2C5;Q8CD00;Q8CCE6	Myotubularin	Mtm1	tr|B1AW21|B1AW21_MOUSE Myotubularin OS=Mus musculus GN=Mtm1 PE=4 SV=1;tr|Q3TLK7|Q3TLK7_MOUSE Putative uncharacterized protein OS=Mus musculus GN=Mtm1 PE=2 SV=1;tr|Q9D4L1|Q9D4L1_MOUSE Putative uncharacterized protein OS=Mus musculus GN=Mtm1 PE=2 SV=1;sp|Q9Z	113970000	6943900	74642000	5014200	2922300	178050	1913900	138680000	0	74029000	6	5	5	11.7	10.1	10.1	65.962	0	5.8767	195560000	8	3	1	4	3	1	5	3	1	4	3	1	4
497	B1AW58;Q8BW96;Q3TDM2;Q3UH04;Q8BW96-2;Q8BW96-3	B1AW58;Q8BW96;Q3TDM2;Q3UH04;Q8BW96-2;Q8BW96-3	Calcium/calmodulin-dependent protein kinase type 1D	Camk1d	tr|B1AW58|B1AW58_MOUSE Calcium/calmodulin-dependent protein kinase ID OS=Mus musculus GN=Camk1d PE=2 SV=1;sp|Q8BW96|KCC1D_MOUSE Calcium/calmodulin-dependent protein kinase type 1D OS=Mus musculus GN=Camk1d PE=1 SV=2;tr|Q3TDM2|Q3TDM2_MOUSE Putative uncharac	161930000	99201000	52378000	14929000	7710900	4723800	2494200	195910000	117340000	51549000	9	6	6	33.5	24.4	24.4	42.918	0	20.311	313510000	8	5	2	1	9	5	5	6	2	2	6	2	2
498	B1AWB9;O88207;A3KGE7	B1AWB9;O88207;A3KGE7	Collagen alpha-1(V) chain	Col5a1	tr|B1AWB9|B1AWB9_MOUSE Collagen, type V, alpha 1 OS=Mus musculus GN=Col5a1 PE=2 SV=1;sp|O88207|CO5A1_MOUSE Collagen alpha-1(V) chain OS=Mus musculus GN=Col5a1 PE=2 SV=2;tr|A3KGE7|A3KGE7_MOUSE Collagen alpha-1(V) chain (Fragment) OS=Mus musculus GN=Col5a1 P	11328000	0	31294000	439400	116780	0	322620	20521000	0	31850000	2	2	2	1.7	1.7	1.7	183.67	0.00093429	2.3592	42621000	3	1	0	2	1	0	2	1	0	2	1	0	2
499	B1AWE0;Q6PFA2;B1AWE1;B1AWD8;B1AWD9;O08585;Q3THU7	B1AWE0;Q6PFA2;B1AWE1;B1AWD8;B1AWD9;O08585;Q3THU7	Clathrin light chain A	Clta	tr|B1AWE0|B1AWE0_MOUSE Clathrin light chain A OS=Mus musculus GN=Clta PE=1 SV=1;tr|Q6PFA2|Q6PFA2_MOUSE Clathrin light chain A OS=Mus musculus GN=Clta PE=1 SV=1;tr|B1AWE1|B1AWE1_MOUSE Clathrin light chain A OS=Mus musculus GN=Clta PE=1 SV=1;tr|B1AWD8|B1AWD8	5678100000	3851700000	3188900000	1271900000	567810000	385170000	318890000	4580900000	4814100000	4635000000	7	7	7	28.7	28.7	28.7	23.478	0	101.18	12719000000	30	12	9	9	7	6	5	7	6	5	7	6	5
500	B1AWI3;Q69ZF3	B1AWI3;Q69ZF3	Non-lysosomal glucosylceramidase	Gba2	tr|B1AWI3|B1AWI3_MOUSE Non-lysosomal glucosylceramidase (Fragment) OS=Mus musculus GN=Gba2 PE=4 SV=1;sp|Q69ZF3|GBA2_MOUSE Non-lysosomal glucosylceramidase OS=Mus musculus GN=Gba2 PE=1 SV=2	0	11485000	0	1276100	0	1276100	0	0	11975000	0	1	1	1	7.4	7.4	7.4	25.639	0.001233	2.2288	11485000	1	0	1	0	0	1	0	0	1	0	0	1	0
501	B1AWI7;Q6VVW5-2;Q6VVW5;Q6VVW5-3;Q99P52;Q8R1P8;F6YT88;Q3TZ08	B1AWI7;Q6VVW5-2;Q6VVW5;Q6VVW5-3	Atrial natriuretic peptide receptor 2	Npr2	tr|B1AWI7|B1AWI7_MOUSE Atrial natriuretic peptide receptor 2 OS=Mus musculus GN=Npr2 PE=4 SV=1;sp|Q6VVW5-2|ANPRB_MOUSE Isoform 2 of Atrial natriuretic peptide receptor 2 OS=Mus musculus GN=Npr2;sp|Q6VVW5|ANPRB_MOUSE Atrial natriuretic peptide receptor 2 OS	35828000	76933000	34328000	2493000	607250	1303900	581830	85946000	50100000	55892000	4	4	4	5.9	5.9	5.9	115.77	0	5.8206	147090000	5	1	2	2	2	3	3	2	3	3	2	3	3
502	V9GXB5;H3BLB6;Q3TYM2;Q3UJ35;Q3TY73;B1AWK4;Q6GU28;Q60954-3;Q60954;P97367-3;P97367-2;Q60954-2;P97367-4;P97367	V9GXB5;H3BLB6;Q3TYM2;Q3UJ35;Q3TY73;B1AWK4;Q6GU28;Q60954-3;Q60954;P97367-3;P97367-2;Q60954-2;P97367-4;P97367	Homeobox protein Meis1;Homeobox protein Meis2	Meis1;Meis2	tr|V9GXB5|V9GXB5_MOUSE Homeobox protein Meis1 (Fragment) OS=Mus musculus GN=Meis1 PE=4 SV=1;tr|H3BLB6|H3BLB6_MOUSE Homeobox protein Meis1 OS=Mus musculus GN=Meis1 PE=4 SV=1;tr|Q3TYM2|Q3TYM2_MOUSE Homeobox protein Meis2 OS=Mus musculus GN=Meis2 PE=2 SV=1;tr	0	17747000	13251000	2583100	0	1478900	1104200	0	16108000	14505000	1	1	1	4.9	4.9	4.9	24.444	0.0059906	1.3975	30998000	3	0	2	1	0	1	1	0	1	1	0	1	1
503	B1AX98;Q505F5;E9PV22;F6Z4L9;F6YT33	B1AX98;Q505F5;E9PV22	Leucine-rich repeat-containing protein 47	Lrrc47	tr|B1AX98|B1AX98_MOUSE Leucine rich repeat containing 47 OS=Mus musculus GN=Lrrc47 PE=2 SV=1;sp|Q505F5|LRC47_MOUSE Leucine-rich repeat-containing protein 47 OS=Mus musculus GN=Lrrc47 PE=2 SV=1;tr|E9PV22|E9PV22_MOUSE Leucine-rich repeat-containing protein 4	3207200000	2625300000	3254100000	239120000	84400000	69086000	85633000	3587400000	4000700000	3571200000	25	25	25	59.9	59.9	59.9	63.589	0	87.292	9086500000	106	37	36	33	20	20	19	20	20	19	20	20	19
504	Q3V085;B1AXB9	Q3V085;B1AXB9		Gm4907	tr|Q3V085|Q3V085_MOUSE Putative uncharacterized protein OS=Mus musculus GN=Gm4907 PE=2 SV=1;tr|B1AXB9|B1AXB9_MOUSE Predicted gene, EG236749 OS=Mus musculus GN=Gm4907 PE=2 SV=1	0	0	0	0	0	0	0	0	0	0	4	1	1	10.5	2.9	2.9	46.755	1	-2	0	0	0	0	0	3	3	3	0	1	1	0	1	1
505	B1AXD8	B1AXD8	Akirin-2	Akirin2	sp|B1AXD8|AKIR2_MOUSE Akirin-2 OS=Mus musculus GN=Akirin2 PE=1 SV=1	1041900000	898640000	982270000	292280000	104190000	89864000	98227000	1017700000	1166500000	971040000	1	1	1	7	7	7	22.113	0.0029784	1.6703	2922800000	3	1	1	1	1	1	1	1	1	1	1	1	1
506	B1AXI9;J3QMP9;Q62036	B1AXI9;J3QMP9;Q62036	Centrosomal protein of 131 kDa	Cep131	tr|B1AXI9|B1AXI9_MOUSE 5-azacytidine induced gene 1 OS=Mus musculus GN=Cep131 PE=1 SV=1;tr|J3QMP9|J3QMP9_MOUSE Centrosomal protein of 131 kDa OS=Mus musculus GN=Cep131 PE=1 SV=1;sp|Q62036|CP131_MOUSE Centrosomal protein of 131 kDa OS=Mus musculus GN=Cep131	320590000	6742000000	7778800000	206130000	4452600	93639000	108040000	5174200000	5439500000	5203500000	15	15	15	20	20	20	120.23	0	32.718	14841000000	36	11	13	12	8	9	12	8	9	12	8	9	12
507	B1AXP6;B1AXP6-2;B1AXP6-3;B1AXP6-4	B1AXP6;B1AXP6-2;B1AXP6-3;B1AXP6-4	Mitochondrial import receptor subunit TOM5 homolog	Tomm5	sp|B1AXP6|TOM5_MOUSE Mitochondrial import receptor subunit TOM5 homolog OS=Mus musculus GN=Tomm5 PE=3 SV=1;sp|B1AXP6-2|TOM5_MOUSE Isoform 2 of Mitochondrial import receptor subunit TOM5 homolog OS=Mus musculus GN=Tomm5;sp|B1AXP6-3|TOM5_MOUSE Isoform 3 of M	438250000	285420000	501730000	245080000	87650000	57084000	100350000	572080000	458600000	475140000	3	3	3	43.1	43.1	43.1	6.0372	0.0065521	1.3407	1225400000	9	2	4	3	1	2	2	1	2	2	1	2	2
508	B1AXS6;B1AXS8;B1AXS7;B1AXS5;Q9JLM4;B0R077;Q8CG95	B1AXS6;B1AXS8;B1AXS7;B1AXS5;Q9JLM4;B0R077;Q8CG95	Zinc finger MYM-type protein 3	Zmym3	tr|B1AXS6|B1AXS6_MOUSE Zinc finger MYM-type protein 3 OS=Mus musculus GN=Zmym3 PE=4 SV=1;tr|B1AXS8|B1AXS8_MOUSE Zinc finger MYM-type protein 3 OS=Mus musculus GN=Zmym3 PE=4 SV=1;tr|B1AXS7|B1AXS7_MOUSE Zinc finger MYM-type protein 3 OS=Mus musculus GN=Zmym3	60950000	0	24372000	1273500	909700	0	363750	66448000	0	50599000	3	3	3	2.8	2.8	2.8	142.06	0.00047378	2.5264	85321000	4	2	0	2	2	0	2	2	0	2	2	0	2
509	B1AY10-2;B1AY10-3;B1AY10	B1AY10-2;B1AY10-3;B1AY10	Transcriptional repressor NF-X1	Nfx1	sp|B1AY10-2|NFX1_MOUSE Isoform 2 of Transcriptional repressor NF-X1 OS=Mus musculus GN=Nfx1;sp|B1AY10-3|NFX1_MOUSE Isoform 3 of Transcriptional repressor NF-X1 OS=Mus musculus GN=Nfx1;sp|B1AY10|NFX1_MOUSE Transcriptional repressor NF-X1 OS=Mus musculus GN=	180280000	149250000	152320000	10252000	3835800	3175500	3240800	187920000	196350000	201400000	9	9	9	17.2	17.2	17.2	89.438	0	19.73	481850000	13	4	4	5	5	5	5	5	5	5	5	5	5
510	E9PV45;B1AY13;B1AY13-2	E9PV45;B1AY13	Ubiquitin carboxyl-terminal hydrolase;Ubiquitin carboxyl-terminal hydrolase 24	Usp24	tr|E9PV45|E9PV45_MOUSE Ubiquitin carboxyl-terminal hydrolase OS=Mus musculus GN=Usp24 PE=1 SV=1;sp|B1AY13|UBP24_MOUSE Ubiquitin carboxyl-terminal hydrolase 24 OS=Mus musculus GN=Usp24 PE=1 SV=1	1180700000	1151800000	1510400000	25620000	7871700	7678700	10070000	1530200000	1517400000	1626000000	45	45	45	24	24	24	294.13	0	99.975	3843000000	101	30	31	40	30	27	33	30	27	33	30	27	33
511	Q9D2L4;B1AYG7;B1AYG6;Q9Z0T9	Q9D2L4;B1AYG7;B1AYG6;Q9Z0T9	Integrin beta;Integrin beta-6	Itgb6	tr|Q9D2L4|Q9D2L4_MOUSE Integrin beta OS=Mus musculus GN=Itgb6 PE=2 SV=1;tr|B1AYG7|B1AYG7_MOUSE Integrin beta (Fragment) OS=Mus musculus GN=Itgb6 PE=3 SV=1;tr|B1AYG6|B1AYG6_MOUSE Integrin beta OS=Mus musculus GN=Itgb6 PE=3 SV=1;sp|Q9Z0T9|ITB6_MOUSE Integrin	1847600000	1882500000	1957400000	299350000	97241000	99082000	103020000	2539800000	3845600000	2454100000	1	1	1	3.1	3.1	3.1	32.256	0.0028337	1.6931	5687600000	12	4	5	3	1	1	1	1	1	1	1	1	1
512	B1AZ15;B1AZ14;Q3UMF0-4;Q3UMF0-2;Q3UMF0-3;Q3UMF0;B1AZ26;B1AZ25;B1AZ20;Q8BJK8	B1AZ15;B1AZ14;Q3UMF0-4;Q3UMF0-2;Q3UMF0-3;Q3UMF0	Cordon-bleu protein-like 1	Cobll1	tr|B1AZ15|B1AZ15_MOUSE Cordon-bleu protein-like 1 OS=Mus musculus GN=Cobll1 PE=1 SV=1;tr|B1AZ14|B1AZ14_MOUSE Cordon-bleu protein-like 1 OS=Mus musculus GN=Cobll1 PE=1 SV=1;sp|Q3UMF0-4|COBL1_MOUSE Isoform 4 of Cordon-bleu protein-like 1 OS=Mus musculus GN=C	4194100000	3934700000	4448100000	155270000	51778000	48576000	54915000	4415600000	5102200000	4927400000	50	50	50	55.2	55.2	55.2	133.27	0	157.57	12577000000	181	67	55	59	39	39	39	39	39	39	39	39	39
513	B1AZ39;P0C0A3;B1AZ42;B1AZ41;Q3TS10	B1AZ39;P0C0A3;B1AZ42	Charged multivesicular body protein 6	Chmp6	tr|B1AZ39|B1AZ39_MOUSE Chromatin modifying protein 6 OS=Mus musculus GN=Chmp6 PE=2 SV=1;sp|P0C0A3|CHMP6_MOUSE Charged multivesicular body protein 6 OS=Mus musculus GN=Chmp6 PE=2 SV=2;tr|B1AZ42|B1AZ42_MOUSE Charged multivesicular body protein 6 (Fragment) O	83675000	173290000	131750000	35338000	7606800	15754000	11977000	110020000	196360000	143680000	5	4	4	23.5	23.5	23.5	23.415	0	12.493	388710000	8	3	2	3	2	3	2	2	2	2	2	2	2
514	B1AZ46;Q3UKP6;Q8BKX1-3;Q8BKX1-2;Q8BKX1;Q8BKX1-4;Q3TV50	B1AZ46;Q3UKP6;Q8BKX1-3;Q8BKX1-2;Q8BKX1;Q8BKX1-4;Q3TV50	Brain-specific angiogenesis inhibitor 1-associated protein 2	Baiap2	tr|B1AZ46|B1AZ46_MOUSE Brain-specific angiogenesis inhibitor 1-associated protein 2 OS=Mus musculus GN=Baiap2 PE=1 SV=1;tr|Q3UKP6|Q3UKP6_MOUSE Putative uncharacterized protein OS=Mus musculus GN=Baiap2 PE=2 SV=1;sp|Q8BKX1-3|BAIP2_MOUSE Isoform 3 of Brain-s	614830000	618660000	792390000	48235000	14639000	14730000	18866000	867840000	844520000	883590000	16	16	16	39.5	39.5	39.5	57.681	0	38.375	2025900000	42	12	15	15	10	13	11	10	13	11	10	13	11
515	D3YWD3;B1AZA5;B1AZA8	D3YWD3;B1AZA5;B1AZA8	Transmembrane protein 245	Tmem245	tr|D3YWD3|D3YWD3_MOUSE Transmembrane protein 245 OS=Mus musculus GN=Tmem245 PE=1 SV=1;sp|B1AZA5|TM245_MOUSE Transmembrane protein 245 OS=Mus musculus GN=Tmem245 PE=1 SV=1;tr|B1AZA8|B1AZA8_MOUSE Transmembrane protein 245 (Fragment) OS=Mus musculus GN=Tmem24	294400000	208830000	451570000	35363000	10904000	7734300	16725000	426470000	280100000	432730000	6	6	6	10.3	10.3	10.3	97.73	0	27.338	954790000	18	7	5	6	4	3	4	4	3	4	4	3	4
516	B1AZI6;Q3US09;Q3UYT9;Q3UUT9;Q8C690;F6SBF2;F6W2C7;B8A4C2;F6VK25;Q8CCY8;Q3TPY8;F6QCT0;B1AZI7;F6RBN0	B1AZI6	THO complex subunit 2	Thoc2	sp|B1AZI6|THOC2_MOUSE THO complex subunit 2 OS=Mus musculus GN=Thoc2 PE=1 SV=1	2658600000	1988500000	2575400000	83017000	30558000	22856000	29602000	2974500000	3019500000	2736700000	38	38	23	29.9	29.9	18.9	182.77	0	101.12	7222400000	130	47	37	46	31	23	32	31	23	32	19	15	20
517	Q3UCF7;B7ZNS2;B1AZP2-3;B1AZP2-2;B1AZP2;E9PUF2;I1E4X0;F6YMR0;H3BJW9;H3BKJ0;H3BL90;H3BJD4	Q3UCF7;B7ZNS2;B1AZP2-3;B1AZP2-2;B1AZP2;E9PUF2;I1E4X0;F6YMR0;H3BJW9	Disks large-associated protein 4	Dlgap4	tr|Q3UCF7|Q3UCF7_MOUSE Putative uncharacterized protein (Fragment) OS=Mus musculus GN=Dlgap4 PE=2 SV=1;tr|B7ZNS2|B7ZNS2_MOUSE Disks large-associated protein 4 OS=Mus musculus GN=Dlgap4 PE=1 SV=1;sp|B1AZP2-3|DLGP4_MOUSE Isoform 3 of Disks large-associated p	191840000	201010000	322380000	27509000	7378600	7731000	12399000	206180000	315670000	282230000	6	6	6	19.9	19.9	19.9	49.849	0	75.133	715230000	19	6	5	8	5	3	5	5	3	5	5	3	5
518	Q8BST8;Q793C9;B1B0E8;Q64707;Q62377	Q8BST8;Q793C9;B1B0E8;Q64707;Q62377	U2 small nuclear ribonucleoprotein auxiliary factor 35 kDa subunit-related protein 1;U2 small nuclear ribonucleoprotein auxiliary factor 35 kDa subunit-related protein 2	Zrsr1;Zrsr2	tr|Q8BST8|Q8BST8_MOUSE Putative uncharacterized protein OS=Mus musculus GN=Zrsr1 PE=2 SV=1;tr|Q793C9|Q793C9_MOUSE U2 small nuclear ribonucleoprotein auxiliary factor (U2AF) 1, related sequence 1 OS=Mus musculus GN=Zrsr1 PE=2 SV=1;tr|B1B0E8|B1B0E8_MOUSE U2	0	19417000	0	882590	0	882590	0	0	26301000	0	1	1	1	2.6	2.6	2.6	51.236	0.0024129	1.8828	19417000	1	0	1	0	0	1	0	0	1	0	0	1	0
519	B1B1A8;Q6PDN3-2;Q6PDN3-3;Q6PDN3;Q8CIY5;Q8CIY6;Q6PDN3-4	B1B1A8;Q6PDN3-2;Q6PDN3-3;Q6PDN3;Q8CIY5;Q8CIY6;Q6PDN3-4	Myosin light chain kinase, smooth muscle;Myosin light chain kinase, smooth muscle, deglutamylated form	Mylk	tr|B1B1A8|B1B1A8_MOUSE Myosin light chain kinase, smooth muscle OS=Mus musculus GN=Mylk PE=1 SV=1;sp|Q6PDN3-2|MYLK_MOUSE Isoform 2 of Myosin light chain kinase, smooth muscle OS=Mus musculus GN=Mylk;sp|Q6PDN3-3|MYLK_MOUSE Isoform 3 of Myosin light chain ki	54657000	36142000	25752000	947570	444360	293840	209370	50317000	46397000	39940000	2	2	2	1	1	1	213.61	0.0025545	1.8061	116550000	8	3	3	2	2	1	1	2	1	1	2	1	1
520	B1B1D8;Q9D773;B1B1D7	B1B1D8;Q9D773;B1B1D7	39S ribosomal protein L2, mitochondrial	Mrpl2	tr|B1B1D8|B1B1D8_MOUSE 39S ribosomal protein L2, mitochondrial OS=Mus musculus GN=Mrpl2 PE=4 SV=1;sp|Q9D773|RM02_MOUSE 39S ribosomal protein L2, mitochondrial OS=Mus musculus GN=Mrpl2 PE=2 SV=1;tr|B1B1D7|B1B1D7_MOUSE 39S ribosomal protein L2, mitochondrial	406920000	527680000	862930000	94607000	21417000	27773000	45417000	672780000	860210000	808790000	6	6	6	29.3	29.3	29.3	33.099	0	27.356	1797500000	17	2	8	7	2	5	5	2	5	5	2	5	5
521	B1GX80;B1GX81;Q61036-2;Q61036;A3KGC5;A3KGC3;A3KGC4;A3KGC2	B1GX80;B1GX81;Q61036-2;Q61036	Non-specific serine/threonine protein kinase;Serine/threonine-protein kinase PAK 3	Pak3	tr|B1GX80|B1GX80_MOUSE PAK3c protein OS=Mus musculus GN=Pak3 PE=2 SV=1;tr|B1GX81|B1GX81_MOUSE PAK3cb protein OS=Mus musculus GN=Pak3 PE=2 SV=1;sp|Q61036-2|PAK3_MOUSE Isoform 2 of Serine/threonine-protein kinase PAK 3 OS=Mus musculus GN=Pak3;sp|Q61036|PAK3_	63616000	72400000	73789000	6993500	2120500	2413300	2459600	70314000	81349000	78257000	11	2	2	27.3	6	6	63.001	0	8.4242	209810000	3	1	1	1	10	10	10	2	2	2	2	2	2
522	S4R1B9;B1Q2W7;D3YZK4;Q80UV9-3;Q80UV9;Q80UV9-2;A0A067XG50	S4R1B9;B1Q2W7;D3YZK4;Q80UV9-3;Q80UV9;Q80UV9-2	Transcription initiation factor TFIID subunit 1	Taf1	tr|S4R1B9|S4R1B9_MOUSE Transcription initiation factor TFIID subunit 1 OS=Mus musculus GN=Taf1 PE=1 SV=1;tr|B1Q2W7|B1Q2W7_MOUSE TAF1 RNA polymerase II, TATA box binding protein (TBP)-associated factor, neuron specific isoform OS=Mus musculus GN=Taf1 PE=2 S	77927000	124940000	113390000	3720700	916790	1469900	1334000	130610000	154020000	122870000	10	10	10	6.6	6.6	6.6	197.37	0	9.9583	316260000	17	5	6	6	5	6	6	5	6	6	5	6	6
523	B2CY77;P14206	B2CY77;P14206	40S ribosomal protein SA	Rpsa	tr|B2CY77|B2CY77_MOUSE Laminin receptor (Fragment) OS=Mus musculus GN=Rpsa PE=2 SV=1;sp|P14206|RSSA_MOUSE 40S ribosomal protein SA OS=Mus musculus GN=Rpsa PE=1 SV=4	25664000000	22401000000	27999000000	5070900000	1710900000	1493400000	1866600000	29497000000	28124000000	34180000000	14	14	14	58.6	58.6	58.6	32.85	0	219.39	76064000000	216	75	73	68	14	12	12	14	12	12	14	12	12
524	B2KF50;Q570Z6	B2KF50;Q570Z6		Uhrf1bp1	tr|B2KF50|B2KF50_MOUSE Protein Uhrf1bp1 OS=Mus musculus GN=Uhrf1bp1 PE=1 SV=1;tr|Q570Z6|Q570Z6_MOUSE MKIAA4127 protein (Fragment) OS=Mus musculus GN=Uhrf1bp1 PE=2 SV=1	119110000	104270000	159380000	4907100	1527000	1336800	2043300	130660000	119030000	207290000	7	6	6	6	5.5	5.5	157.01	0	12.627	382750000	14	5	5	4	7	5	3	6	4	3	6	4	3
525	B2KF73;Q58DZ4;P84102;O88892	B2KF73;Q58DZ4;P84102;O88892	Small EDRK-rich factor 2;Small EDRK-rich factor 1	Serf1;Serf2	tr|B2KF73|B2KF73_MOUSE Small EDRK-rich factor 1 OS=Mus musculus GN=Serf1 PE=4 SV=1;tr|Q58DZ4|Q58DZ4_MOUSE Small EDRK-rich factor 2 OS=Mus musculus GN=Serf2 PE=2 SV=1;sp|P84102|SERF2_MOUSE Small EDRK-rich factor 2 OS=Mus musculus GN=Serf2 PE=2 SV=1;sp|O8889	0	118800000	299840000	104660000	0	29700000	74961000	0	123870000	223830000	1	1	1	16.7	16.7	16.7	5.6684	0.0025495	1.7792	418640000	2	0	1	1	0	1	1	0	1	1	0	1	1
526	B2KFW6;Q9QWH1-2;Q9QWH1;B1ASA3;B1ASA2;D3YY34;B7ZNA5;Q8CHP6	B2KFW6;Q9QWH1-2;Q9QWH1	Polyhomeotic-like protein 2	Phc2	tr|B2KFW6|B2KFW6_MOUSE Polyhomeotic-like 2 (Drosophila) OS=Mus musculus GN=Phc2 PE=4 SV=1;sp|Q9QWH1-2|PHC2_MOUSE Isoform 2 of Polyhomeotic-like protein 2 OS=Mus musculus GN=Phc2;sp|Q9QWH1|PHC2_MOUSE Polyhomeotic-like protein 2 OS=Mus musculus GN=Phc2 PE=1	755990000	189880000	377310000	33080000	18900000	4747100	9432800	676640000	368190000	555900000	8	8	8	10.4	10.4	10.4	89.754	0	16.684	1323200000	23	12	4	7	7	3	6	7	3	6	7	3	6
527	B2KG29;Q9CQ39	B2KG29;Q9CQ39	Mediator of RNA polymerase II transcription subunit 21	Med21	tr|B2KG29|B2KG29_MOUSE Mediator of RNA polymerase II transcription subunit 21 OS=Mus musculus GN=Med21 PE=4 SV=1;sp|Q9CQ39|MED21_MOUSE Mediator of RNA polymerase II transcription subunit 21 OS=Mus musculus GN=Med21 PE=1 SV=1	29507000	6307300	37997000	36906000	14754000	3153600	18999000	35281000	12325000	31473000	1	1	1	22.2	22.2	22.2	9.6798	0.00032026	2.7044	73811000	7	3	1	3	1	1	1	1	1	1	1	1	1
528	B2KGA7;Q505B7-2;Q505B7;A8Y5E9	B2KGA7;Q505B7-2;Q505B7;A8Y5E9	Protein archease	Zbtb8os	tr|B2KGA7|B2KGA7_MOUSE Protein archease OS=Mus musculus GN=Zbtb8os PE=4 SV=1;sp|Q505B7-2|ARCH_MOUSE Isoform 2 of Protein archease OS=Mus musculus GN=Zbtb8os;sp|Q505B7|ARCH_MOUSE Protein archease OS=Mus musculus GN=Zbtb8os PE=2 SV=2;tr|A8Y5E9|A8Y5E9_MOUSE P	231900000	262020000	306630000	80055000	23190000	26202000	30663000	272070000	316620000	352810000	3	3	3	20.4	20.4	20.4	19.58	0	7.5647	800550000	11	3	4	4	3	3	3	3	3	3	3	3	3
529	B2LVG5;B2LVG6;E0CXT7;Q8BQZ5;Q8BQZ5-3;Q8BQZ5-2;F7B6Z5;M0QWM8	B2LVG5;B2LVG6;E0CXT7;Q8BQZ5;Q8BQZ5-3;Q8BQZ5-2;F7B6Z5	Cleavage and polyadenylation specificity factor subunit 4	Cpsf4	tr|B2LVG5|B2LVG5_MOUSE Cleavage and polyadenylation specific factor 4 isoform 1 OS=Mus musculus GN=Cpsf4 PE=2 SV=1;tr|B2LVG6|B2LVG6_MOUSE Cleavage and polyadenylation specific factor 4 isoform 2 OS=Mus musculus GN=Cpsf4 PE=2 SV=1;tr|E0CXT7|E0CXT7_MOUSE Cle	415890000	411540000	258360000	63870000	24464000	24208000	15197000	405830000	512280000	514550000	9	9	9	50.6	50.6	50.6	27.419	0	12.004	1085800000	23	12	8	3	8	7	3	8	7	3	8	7	3
530	B2M1R6;P61979-3;Q3TL71;Q3U9Q3;Q3U6X2;H3BKD0;H3BKI8;Q8BT23;H3BLP7;H3BJ43;H3BJS9	B2M1R6;P61979-3;Q3TL71;Q3U9Q3;Q3U6X2;H3BKD0	Heterogeneous nuclear ribonucleoprotein K	Hnrnpk	tr|B2M1R6|B2M1R6_MOUSE Heterogeneous nuclear ribonucleoprotein K OS=Mus musculus GN=Hnrnpk PE=1 SV=1;sp|P61979-3|HNRPK_MOUSE Isoform 3 of Heterogeneous nuclear ribonucleoprotein K OS=Mus musculus GN=Hnrnpk;tr|Q3TL71|Q3TL71_MOUSE Putative uncharacterized pr	52936000000	48794000000	52806000000	5519200000	1890600000	1742700000	1885900000	58727000000	61273000000	54265000000	32	32	0	67	67	0	48.562	0	323.31	154540000000	376	126	126	124	28	28	25	28	28	25	0	0	0
531	B2M1R7;Q61990-3;Q3TF69;G3UYM5	B2M1R7;Q61990-3;Q3TF69	Poly(rC)-binding protein 2	Pcbp2	tr|B2M1R7|B2M1R7_MOUSE Poly(RC) binding protein 2 OS=Mus musculus GN=Pcbp2 PE=2 SV=1;sp|Q61990-3|PCBP2_MOUSE Isoform 3 of Poly(rC)-binding protein 2 OS=Mus musculus GN=Pcbp2;tr|Q3TF69|Q3TF69_MOUSE Putative uncharacterized protein OS=Mus musculus GN=Pcbp2 P	267120000	270990000	560200000	54916000	13356000	13549000	28010000	263850000	305330000	469300000	16	1	1	62.9	8	8	38.15	0	13.969	1098300000	4	1	1	2	16	14	16	1	1	1	1	1	1
532	B2MWM9;P14211;Q3UWP8;Q62041	B2MWM9;P14211;Q3UWP8	Calreticulin	Calr	tr|B2MWM9|B2MWM9_MOUSE Calreticulin OS=Mus musculus GN=Calr PE=2 SV=1;sp|P14211|CALR_MOUSE Calreticulin OS=Mus musculus GN=Calr PE=1 SV=1;tr|Q3UWP8|Q3UWP8_MOUSE Putative uncharacterized protein (Fragment) OS=Mus musculus GN=Calr PE=2 SV=1	95686000000	91480000000	108570000000	9857900000	3189500000	3049300000	3619100000	98064000000	104850000000	110470000000	30	30	30	77.6	77.6	77.6	47.994	0	323.31	295740000000	816	282	248	286	26	24	29	26	24	29	26	24	29
533	B2RPS1;Q0PD56;P61021;Q8C458	B2RPS1;Q0PD56;P61021;Q8C458	Ras-related protein Rab-5B	Rab5b	tr|B2RPS1|B2RPS1_MOUSE RAB5B, member RAS oncogene family OS=Mus musculus GN=Rab5b PE=2 SV=1;tr|Q0PD56|Q0PD56_MOUSE Rab5B OS=Mus musculus GN=Rab5b PE=2 SV=1;sp|P61021|RAB5B_MOUSE Ras-related protein Rab-5B OS=Mus musculus GN=Rab5b PE=1 SV=1;tr|Q8C458|Q8C458	1512900000	1105600000	1297400000	279700000	108060000	78972000	92670000	1843100000	1442200000	1312900000	7	5	5	50.7	40.5	40.5	23.707	0	37.543	3915900000	38	12	14	12	7	6	6	5	4	4	5	4	4
534	Q811R6;B2RPU7;P58334	Q811R6;B2RPU7;P58334	Krueppel-like factor 16	Klf16	tr|Q811R6|Q811R6_MOUSE Dopamine receptor regulating factor (Fragment) OS=Mus musculus PE=4 SV=1;tr|B2RPU7|B2RPU7_MOUSE Kruppel-like factor 16 OS=Mus musculus GN=Klf16 PE=2 SV=1;sp|P58334|KLF16_MOUSE Krueppel-like factor 16 OS=Mus musculus GN=Klf16 PE=2 SV=	21161000	19142000	0	10076000	5290300	4785600	0	29762000	26955000	0	1	1	1	20.5	20.5	20.5	14.622	0.0096181	1.1757	40304000	3	2	1	0	1	1	0	1	1	0	1	1	0
535	D3Z5B1;Q8CEW7;B2RPU8;Q9D1L0;Q8K3S8	D3Z5B1;Q8CEW7;B2RPU8;Q9D1L0	Coiled-coil-helix-coiled-coil-helix domain-containing protein 2	Zbed5;Chchd2	tr|D3Z5B1|D3Z5B1_MOUSE Protein Zbed5 (Fragment) OS=Mus musculus GN=Zbed5 PE=4 SV=2;tr|Q8CEW7|Q8CEW7_MOUSE Putative uncharacterized protein OS=Mus musculus GN=Zbed5 PE=2 SV=1;tr|B2RPU8|B2RPU8_MOUSE MCG130675 OS=Mus musculus GN=Zbed5 PE=2 SV=1;sp|Q9D1L0|CHCH	2350500000	2396900000	3087600000	979370000	293810000	299610000	385950000	2770700000	3559700000	3508700000	3	3	3	25.1	25.1	25.1	19.183	0	27.836	7835000000	32	10	11	11	3	3	3	3	3	3	3	3	3
536	B2RPV4;Q66JV4;Q80YR9;Q66JV4-2	B2RPV4;Q66JV4;Q80YR9;Q66JV4-2	RNA-binding protein 12B-B;RNA-binding protein 12B-A	Rbm12b2;Rbm12b1	tr|B2RPV4|B2RPV4_MOUSE C430048L16Rik protein OS=Mus musculus GN=Rbm12b2 PE=2 SV=1;sp|Q66JV4|R12BB_MOUSE RNA-binding protein 12B-B OS=Mus musculus GN=Rbm12b2 PE=2 SV=2;sp|Q80YR9|R12BA_MOUSE RNA-binding protein 12B-A OS=Mus musculus GN=Rbm12b1 PE=1 SV=2;sp|Q	485990000	205190000	186060000	14868000	8237100	3477800	3153500	329970000	354590000	297870000	10	10	10	13.9	13.9	13.9	96.423	0	11.179	877240000	23	7	7	9	6	7	7	6	7	7	6	7	7
537	B2RPW2;Q8BGV8	B2RPW2;Q8BGV8	Mitochondrial dynamics protein MID51	Mief1	tr|B2RPW2|B2RPW2_MOUSE Smith-Magenis syndrome chromosome region, candidate 7-like (Human) OS=Mus musculus GN=Mief1 PE=2 SV=1;sp|Q8BGV8|MID51_MOUSE Mitochondrial dynamics protein MID51 OS=Mus musculus GN=Mief1 PE=1 SV=1	0	0	52295000	2091800	0	0	2091800	0	0	70244000	4	4	4	15.6	15.6	15.6	51.183	0.0090765	1.2159	52295000	4	1	0	3	1	0	3	1	0	3	1	0	3
538	B2RPW5;G3X9A7;Q8BLJ3	B2RPW5;G3X9A7;Q8BLJ3	PI-PLC X domain-containing protein 3	Plcxd3	tr|B2RPW5|B2RPW5_MOUSE Plcxd3 protein OS=Mus musculus GN=Plcxd3 PE=2 SV=1;tr|G3X9A7|G3X9A7_MOUSE MCG49978 OS=Mus musculus GN=Plcxd3 PE=4 SV=1;sp|Q8BLJ3|PLCX3_MOUSE PI-PLC X domain-containing protein 3 OS=Mus musculus GN=Plcxd3 PE=2 SV=1	118380000	503070000	632560000	96462000	9106200	38698000	48658000	83936000	558530000	565410000	1	1	1	2.2	2.2	2.2	30.802	1	-2	1254000000	12	3	5	4	1	1	1	1	1	1	1	1	1
539	B2RPZ7;Q8BYI8;Q8BYI8-2;Q99L10	B2RPZ7;Q8BYI8;Q8BYI8-2	Uncharacterized protein KIAA1467	8430419L09Rik;Kiaa1467	tr|B2RPZ7|B2RPZ7_MOUSE RIKEN cDNA 8430419L09 OS=Mus musculus GN=8430419L09Rik PE=2 SV=1;sp|Q8BYI8|K1467_MOUSE Uncharacterized protein KIAA1467 OS=Mus musculus GN=Kiaa1467 PE=2 SV=1;sp|Q8BYI8-2|K1467_MOUSE Isoform 2 of Uncharacterized protein KIAA1467 OS=Mu	57992000	163550000	90957000	11574000	2147800	6057400	3368800	107300000	182920000	78167000	3	3	3	8.3	8.3	8.3	67.061	0.0035566	1.5623	312500000	4	1	2	1	2	3	2	2	3	2	2	3	2
540	B2RQ11;Q8CD94	B2RQ11;Q8CD94	Protein lin-52 homolog	Lin52	tr|B2RQ11|B2RQ11_MOUSE Lin-52 homolog (C. elegans) OS=Mus musculus GN=Lin52 PE=2 SV=1;sp|Q8CD94|LIN52_MOUSE Protein lin-52 homolog OS=Mus musculus GN=Lin52 PE=2 SV=1	10776000	8952600	0	2466100	1347000	1119100	0	18722000	20040000	0	1	1	1	12.9	12.9	12.9	13.001	0.0019778	2.0484	19728000	2	1	1	0	1	1	0	1	1	0	1	1	0
541	B2RQ13;B7ZMW5;P70261	B2RQ13;B7ZMW5;P70261	Paladin	Pald1	tr|B2RQ13|B2RQ13_MOUSE X99384 protein OS=Mus musculus GN=Pald1 PE=2 SV=1;tr|B7ZMW5|B7ZMW5_MOUSE cDNA sequence X99384 OS=Mus musculus GN=Pald1 PE=2 SV=1;sp|P70261|PALD_MOUSE Paladin OS=Mus musculus GN=Pald1 PE=1 SV=1	142050000	124620000	195760000	8407700	2582600	2265800	3559200	150310000	167110000	179410000	11	11	3	19.5	19.5	3.4	96.589	0	23.629	462420000	16	5	5	6	5	7	5	5	7	5	1	2	1
542	B2RQ14;Q8CDA1;Q8CDA1-2;Q8CA68;Q8CDA1-3;Q8CDA1-4	B2RQ14;Q8CDA1	Phosphatidylinositide phosphatase SAC2	Inpp5f	tr|B2RQ14|B2RQ14_MOUSE Inositol polyphosphate-5-phosphatase F OS=Mus musculus GN=Inpp5f PE=2 SV=1;sp|Q8CDA1|SAC2_MOUSE Phosphatidylinositide phosphatase SAC2 OS=Mus musculus GN=Inpp5f PE=1 SV=1	667310000	510250000	482290000	23712000	9533000	7289300	6889800	642180000	721170000	712820000	17	17	17	18.6	18.6	18.6	127.61	0	33.015	1659800000	38	14	11	13	12	12	10	12	12	10	12	12	10
543	B2RQ36;Q8R4C2;Q05D93;Q9CSV9;D6RET4;D3Z7T9	B2RQ36;Q8R4C2;Q05D93;Q9CSV9	RUN and FYVE domain-containing protein 2	Rufy2	tr|B2RQ36|B2RQ36_MOUSE RUN and FYVE domain-containing 2 OS=Mus musculus GN=Rufy2 PE=2 SV=1;sp|Q8R4C2|RUFY2_MOUSE RUN and FYVE domain-containing protein 2 OS=Mus musculus GN=Rufy2 PE=1 SV=2;tr|Q05D93|Q05D93_MOUSE Rufy2 protein (Fragment) OS=Mus musculus GN=	402920000	621500000	524320000	33668000	8759100	13511000	11398000	589740000	555120000	558210000	14	14	5	28.4	28.4	11.2	70.092	0	20.676	1548700000	29	8	11	10	7	10	11	7	10	11	0	3	5
544	B7ZMZ2;B2RQ57;F8VQH0;Q4JIM5;Q99P28;Q61055;Q3V2W1;Q3TM13	B7ZMZ2;B2RQ57;F8VQH0;Q4JIM5;Q99P28	Non-specific protein-tyrosine kinase;Abelson tyrosine-protein kinase 2	Abl2	tr|B7ZMZ2|B7ZMZ2_MOUSE V-abl Abelson murine leukemia viral oncogene homolog 2 (Arg, Abelson-related gene) OS=Mus musculus GN=Abl2 PE=2 SV=1;tr|B2RQ57|B2RQ57_MOUSE Abelson tyrosine-protein kinase 2 OS=Mus musculus GN=Abl2 PE=1 SV=1;tr|F8VQH0|F8VQH0_MOUSE Ab	65329000	72655000	61239000	3689300	1209800	1345500	1134100	59792000	71317000	93885000	7	7	5	9.6	9.6	6.5	117.78	0	8.9395	199220000	12	4	4	4	6	5	5	6	5	5	4	4	4
545	B2RQ68;B7ZW89;Q8R4U7;Q6KAP6;Q05CE8;E9Q9L3;F6XG76	B2RQ68;B7ZW89;Q8R4U7	Leucine zipper protein 1	Luzp1	tr|B2RQ68|B2RQ68_MOUSE Luzp1 protein OS=Mus musculus GN=Luzp1 PE=2 SV=1;tr|B7ZW89|B7ZW89_MOUSE Uncharacterized protein OS=Mus musculus GN=Luzp1 PE=2 SV=1;sp|Q8R4U7|LUZP1_MOUSE Leucine zipper protein 1 OS=Mus musculus GN=Luzp1 PE=1 SV=2	522800000	415630000	190950000	16134000	7468600	5937600	2727900	475050000	522790000	400870000	16	16	16	21.2	21.2	21.2	119.26	0	26.339	1129400000	30	11	10	9	9	8	9	9	8	9	9	8	9
546	B2RQ71;E9PWR4;B7ZMZ7;Q69ZV2;Q5EBR0;Q6NY04;Q6PGL8;Q8CBE5	B2RQ71;E9PWR4;B7ZMZ7;Q69ZV2		Dip2c	tr|B2RQ71|B2RQ71_MOUSE Dip2c protein OS=Mus musculus GN=Dip2c PE=2 SV=1;tr|E9PWR4|E9PWR4_MOUSE Protein Dip2c OS=Mus musculus GN=Dip2c PE=4 SV=1;tr|B7ZMZ7|B7ZMZ7_MOUSE Dip2c protein OS=Mus musculus GN=Dip2c PE=2 SV=1;tr|Q69ZV2|Q69ZV2_MOUSE MKIAA0934 protein	117370000	128490000	204080000	5624300	1467100	1606200	2551000	157310000	158140000	190480000	12	10	8	10.4	8	6.6	170.92	0	28.231	449940000	15	5	4	6	7	7	8	6	5	6	5	4	5
547	B2RQC6;E9QAI5;G3UWN2;B2RQC6-2;Q6P9L1;E9QAT6;Q7TN13;Q80VF8;Q9CWQ9;F6S3Z3;Q561M8;Q8C196;O88862	B2RQC6;E9QAI5;G3UWN2;B2RQC6-2;Q6P9L1	CAD protein;Glutamine-dependent carbamoyl-phosphate synthase;Aspartate carbamoyltransferase;Dihydroorotase	Cad	sp|B2RQC6|PYR1_MOUSE CAD protein OS=Mus musculus GN=Cad PE=2 SV=1;tr|E9QAI5|E9QAI5_MOUSE CAD protein OS=Mus musculus GN=Cad PE=3 SV=1;tr|G3UWN2|G3UWN2_MOUSE CAD protein OS=Mus musculus GN=Cad PE=3 SV=1;sp|B2RQC6-2|PYR1_MOUSE Isoform 2 of CAD protein OS=Mus	19305000000	16468000000	18356000000	451070000	160870000	137230000	152970000	21520000000	21326000000	21387000000	85	85	85	54.1	54.1	54.1	243.24	0	323.31	54129000000	443	156	136	151	77	70	72	77	70	72	77	70	72
548	B2RQC7;D3Z5G8;Q3UH60-2	B2RQC7;D3Z5G8;Q3UH60-2	Disco-interacting protein 2 homolog B	Dip2b	tr|B2RQC7|B2RQC7_MOUSE DIP2 disco-interacting protein 2 homolog B (Drosophila) OS=Mus musculus GN=Dip2b PE=2 SV=1;tr|D3Z5G8|D3Z5G8_MOUSE Disco-interacting protein 2 homolog B OS=Mus musculus GN=Dip2b PE=4 SV=1;sp|Q3UH60-2|DIP2B_MOUSE Isoform 2 of Disco-int	0	9539600	54324000	851510	0	127190	724310	0	15469000	48420000	25	1	1	27.5	1.9	1.9	146.7	0.0048444	1.4675	63863000	3	0	1	2	17	16	21	0	1	1	0	1	1
549	B2RQE8;Q9D333	B2RQE8	Rho GTPase-activating protein 42	Arhgap42	sp|B2RQE8|RHG42_MOUSE Rho GTPase-activating protein 42 OS=Mus musculus GN=Arhgap42 PE=1 SV=1	0	14320000	84358000	1701300	0	246900	1454400	0	44029000	84442000	3	3	3	4.9	4.9	4.9	94.635	0.0058488	1.4085	98678000	6	1	2	3	1	2	3	1	2	3	1	2	3
550	B2RQG2;Q80U54;Q8BU94;Q4FZG1;Q8BLA7;Q8VCJ7;A0PJJ1	B2RQG2;Q80U54		Phf3	tr|B2RQG2|B2RQG2_MOUSE PHD finger protein 3 OS=Mus musculus GN=Phf3 PE=1 SV=1;tr|Q80U54|Q80U54_MOUSE MKIAA0244 protein (Fragment) OS=Mus musculus GN=Phf3 PE=2 SV=1	221250000	244650000	187780000	5587000	1891000	2091000	1605000	229940000	293500000	250530000	9	9	9	7	7	7	225.54	0	16.477	653680000	20	8	7	5	6	6	5	6	6	5	6	6	5
551	B2RY26;B2RXX9;Q2TAW4;B2RQQ1;Q91Z83;Q02566	B2RY26;B2RXX9;Q2TAW4;B2RQQ1;Q91Z83;Q02566	Myosin-7;Myosin-6	Myh7;Myh6	tr|B2RY26|B2RY26_MOUSE Myh7 protein OS=Mus musculus GN=Myh7 PE=2 SV=1;tr|B2RXX9|B2RXX9_MOUSE Myosin, heavy polypeptide 7, cardiac muscle, beta OS=Mus musculus GN=Myh7 PE=2 SV=1;tr|Q2TAW4|Q2TAW4_MOUSE Myosin, heavy polypeptide 6, cardiac muscle, alpha OS=Mu	0	0	33787000	270300	0	0	270300	0	0	29613000	2	1	1	1.3	0.8	0.8	222.85	1	-2	33787000	1	0	0	1	1	1	2	0	0	1	0	0	1
552	B2RQQ5;P14873;Q8CFR9;A0PJ96;Q3TZM8;Q3TYV8;Q3UPV4;Q8CAI9;Q3UF78	B2RQQ5;P14873	Microtubule-associated protein 1B;MAP1B heavy chain;MAP1 light chain LC1	Map1b	tr|B2RQQ5|B2RQQ5_MOUSE Microtubule-associated protein 1B OS=Mus musculus GN=Map1b PE=2 SV=1;sp|P14873|MAP1B_MOUSE Microtubule-associated protein 1B OS=Mus musculus GN=Map1b PE=1 SV=2	9533000000	10810000000	9925900000	254360000	80109000	90844000	83411000	11309000000	12592000000	12310000000	72	72	69	45.2	45.2	44.3	270.3	0	323.31	30269000000	297	89	109	99	55	64	57	55	64	57	53	62	54
553	B2RQQ7;Q7TT50;REV__Q7TMV9;REV__Q544E9;REV__P41047;REV__A1Y9B0;F6S522;REV__F5H8M8;REV__D3Z750;Q80YR7	B2RQQ7;Q7TT50	Non-specific serine/threonine protein kinase;Serine/threonine-protein kinase MRCK beta	Cdc42bpb	tr|B2RQQ7|B2RQQ7_MOUSE CDC42 binding protein kinase beta OS=Mus musculus GN=Cdc42bpb PE=2 SV=1;sp|Q7TT50|MRCKB_MOUSE Serine/threonine-protein kinase MRCK beta OS=Mus musculus GN=Cdc42bpb PE=1 SV=2	1644100000	1108700000	1562900000	45913000	17491000	11795000	16627000	1865600000	1747300000	1817700000	39	39	35	28.7	28.7	26.6	194.73	0	130.65	4315800000	74	22	25	27	25	22	25	25	22	25	22	19	23
554	B2RQQ8;P08122;D3YV27	B2RQQ8;P08122	Collagen alpha-2(IV) chain;Canstatin	Col4a2	tr|B2RQQ8|B2RQQ8_MOUSE Collagen, type IV, alpha 2 OS=Mus musculus GN=Col4a2 PE=2 SV=1;sp|P08122|CO4A2_MOUSE Collagen alpha-2(IV) chain OS=Mus musculus GN=Col4a2 PE=2 SV=4	267840000	372990000	388890000	10954000	2849300	3967900	4137200	383640000	461360000	471570000	8	8	7	6.2	6.2	5.7	167.32	0	12.757	1029700000	20	6	7	7	5	6	5	5	6	5	4	5	4
555	B2RQS1;Q9ERG2;Q3UTR6;Q3TNV4;B3STQ1;B3STQ3;B3STQ2;B3STQ4	B2RQS1;Q9ERG2	Striatin-3	Strn3	tr|B2RQS1|B2RQS1_MOUSE Striatin-3 OS=Mus musculus GN=Strn3 PE=1 SV=1;sp|Q9ERG2|STRN3_MOUSE Striatin-3 OS=Mus musculus GN=Strn3 PE=1 SV=1	2577900000	2569900000	2224500000	263300000	92067000	91783000	79448000	3237500000	3507500000	2917600000	20	17	17	38.3	35.1	35.1	77.731	0	79.72	7372300000	74	28	23	23	19	18	15	16	15	12	16	15	12
556	B2RQV1;Q8BWZ3-2;Q8BWZ3;Q8BY54;Q8BKH5;Q8BKI9;G3UZ51	B2RQV1;Q8BWZ3-2;Q8BWZ3	N-alpha-acetyltransferase 25, NatB auxiliary subunit	Naa25	tr|B2RQV1|B2RQV1_MOUSE RIKEN cDNA C330023M02, isoform CRA_a OS=Mus musculus GN=Naa25 PE=2 SV=1;sp|Q8BWZ3-2|NAA25_MOUSE Isoform 2 of N-alpha-acetyltransferase 25, NatB auxiliary subunit OS=Mus musculus GN=Naa25;sp|Q8BWZ3|NAA25_MOUSE N-alpha-acetyltransferas	1324000000	1325400000	1186700000	71040000	24519000	24544000	21977000	1495300000	1575000000	1234000000	25	25	25	33.1	33.1	33.1	111.71	0	54.709	3836200000	60	19	18	23	15	16	19	15	16	19	15	16	19
557	B2RQW1;Q3U4L9;D3Z4L9;Q61333;G3XA62;G3UWJ7;G3UXC6	B2RQW1;Q3U4L9;D3Z4L9;Q61333	Tumor necrosis factor alpha-induced protein 2	Tnfaip2	tr|B2RQW1|B2RQW1_MOUSE Tumor necrosis factor, alpha-induced protein 2 OS=Mus musculus GN=Tnfaip2 PE=2 SV=1;tr|Q3U4L9|Q3U4L9_MOUSE Putative uncharacterized protein OS=Mus musculus GN=Tnfaip2 PE=2 SV=1;tr|D3Z4L9|D3Z4L9_MOUSE Tumor necrosis factor alpha-induc	220880000	157400000	135190000	12837000	5522000	3934900	3379700	198360000	182840000	159190000	7	7	7	11.4	11.4	11.4	73.671	0	9.3825	513460000	16	5	5	6	5	4	5	5	4	5	5	4	5
558	D3YZN4;Q7TNG0;D3Z1Z1;B2RQY8;Q3ULF4;D3YXB7;F6W695;G3UX97;D3Z342	D3YZN4;Q7TNG0;D3Z1Z1;B2RQY8;Q3ULF4;D3YXB7	Paraplegin	Spg7	tr|D3YZN4|D3YZN4_MOUSE Paraplegin OS=Mus musculus GN=Spg7 PE=1 SV=1;tr|Q7TNG0|Q7TNG0_MOUSE Spg7 protein (Fragment) OS=Mus musculus GN=Spg7 PE=2 SV=1;tr|D3Z1Z1|D3Z1Z1_MOUSE Paraplegin OS=Mus musculus GN=Spg7 PE=1 SV=1;tr|B2RQY8|B2RQY8_MOUSE Spastic parapleg	152800000	145430000	205030000	12275000	3726800	3547000	5000800	221540000	241430000	264340000	7	7	7	19.1	19.1	19.1	75.002	0	14.388	503260000	15	5	5	5	5	5	5	5	5	5	5	5	5
559	F7B458;B2RQZ0;Q8BXG3-2;Q8BXG3	F7B458;B2RQZ0;Q8BXG3-2;Q8BXG3	Intraflagellar transport protein 57 homolog	Ift57	tr|F7B458|F7B458_MOUSE Intraflagellar transport protein 57 homolog (Fragment) OS=Mus musculus GN=Ift57 PE=4 SV=1;tr|B2RQZ0|B2RQZ0_MOUSE Intraflagellar transport 57 homolog (Chlamydomonas) OS=Mus musculus GN=Ift57 PE=2 SV=1;sp|Q8BXG3-2|IFT57_MOUSE Isoform 2	0	587400000	628880000	76017000	0	36713000	39305000	0	639240000	572420000	1	1	1	6	6	6	34.5	0.00062657	2.4381	1216300000	3	0	1	2	0	1	1	0	1	1	0	1	1
560	B2RR26;Q8BZW8;Q9CW64;Q8C1S8	B2RR26;Q8BZW8;Q9CW64;Q8C1S8	NHL repeat-containing protein 2	Nhlrc2	tr|B2RR26|B2RR26_MOUSE NHL repeat containing 2 OS=Mus musculus GN=Nhlrc2 PE=2 SV=1;sp|Q8BZW8|NHLC2_MOUSE NHL repeat-containing protein 2 OS=Mus musculus GN=Nhlrc2 PE=2 SV=1;tr|Q9CW64|Q9CW64_MOUSE Putative uncharacterized protein (Fragment) OS=Mus musculus	1132800000	1181900000	1113300000	110580000	36543000	38126000	35913000	1419100000	1729900000	1228900000	18	18	17	46.3	46.3	45.5	78.429	0	67.029	3428000000	67	20	23	24	13	13	14	13	13	14	13	12	13
561	B2RR42;Q499E4-2;Q499E4;B7ZNE9	B2RR42;Q499E4-2;Q499E4;B7ZNE9	Zinc finger protein DZIP1L	Dzip1l	tr|B2RR42|B2RR42_MOUSE DAZ interacting protein 1-like OS=Mus musculus GN=Dzip1l PE=2 SV=1;sp|Q499E4-2|DZI1L_MOUSE Isoform 2 of Zinc finger protein DZIP1L OS=Mus musculus GN=Dzip1l;sp|Q499E4|DZI1L_MOUSE Zinc finger protein DZIP1L OS=Mus musculus GN=Dzip1l P	43149000	0	11745000	1076300	846050	0	230290	33783000	0	29033000	3	3	3	5.2	5.2	5.2	87.593	0.00017091	3.7249	54893000	4	3	0	1	3	0	1	3	0	1	3	0	1
562	B2RR53;G5E828;Q8VDS7-2;Q8VDS7-1;Q8VDS7	B2RR53;G5E828;Q8VDS7-2;Q8VDS7-1;Q8VDS7	Centrosomal protein CEP57L1	Cep57l1	tr|B2RR53|B2RR53_MOUSE 2410017P07Rik protein OS=Mus musculus GN=Cep57l1 PE=2 SV=1;tr|G5E828|G5E828_MOUSE Centrosomal protein CEP57L1 OS=Mus musculus GN=Cep57l1 PE=4 SV=1;sp|Q8VDS7-2|CE57L_MOUSE Isoform 3 of Centrosomal protein CEP57L1 OS=Mus musculus GN=Ce	0	0	0	0	0	0	0	0	0	0	1	1	1	3.5	3.5	3.5	46.82	1	-2	0	0	0	0	0	0	0	1	0	0	1	0	0	1
563	E9QNG1;B2RR82;Q9Z0R6;Q9Z0R6-2;Q80TG5;Q3V3Y8;Q3TQ85;Q8CD59	E9QNG1;B2RR82;Q9Z0R6;Q9Z0R6-2;Q80TG5;Q3V3Y8;Q3TQ85	Intersectin-2	Itsn2;mKIAA1256	tr|E9QNG1|E9QNG1_MOUSE Intersectin-2 OS=Mus musculus GN=Itsn2 PE=1 SV=1;tr|B2RR82|B2RR82_MOUSE Itsn2 protein OS=Mus musculus GN=Itsn2 PE=2 SV=1;sp|Q9Z0R6|ITSN2_MOUSE Intersectin-2 OS=Mus musculus GN=Itsn2 PE=1 SV=2;sp|Q9Z0R6-2|ITSN2_MOUSE Isoform 2 of Inte	246050000	157930000	398210000	8356100	2563000	1645100	4148000	362470000	274350000	315260000	18	15	15	14.1	12.5	12.5	188.78	0	16.437	802190000	25	9	7	9	12	10	12	11	9	10	11	9	10
564	B2RR83;Q3UST9	B2RR83	Probable ATP-dependent RNA helicase YTHDC2	Ythdc2	sp|B2RR83|YTDC2_MOUSE Probable ATP-dependent RNA helicase YTHDC2 OS=Mus musculus GN=Ythdc2 PE=1 SV=1	233400000	159830000	923180000	14627000	2593300	1775800	10258000	538360000	520950000	484170000	15	15	15	13.6	13.6	13.6	161.09	0	18.232	1316400000	23	5	8	10	6	8	9	6	8	9	6	8	9
565	B2RRA5;Q9CWS1	B2RRA5;Q9CWS1	E3 ubiquitin-protein ligase RNF135	Rnf135	tr|B2RRA5|B2RRA5_MOUSE Ring finger protein 135 OS=Mus musculus GN=Rnf135 PE=2 SV=1;sp|Q9CWS1|RN135_MOUSE E3 ubiquitin-protein ligase RNF135 OS=Mus musculus GN=Rnf135 PE=2 SV=1	0	0	9742800	423600	0	0	423600	0	0	9445100	1	1	1	3.6	3.6	3.6	46.461	0.0028392	1.7209	9742800	1	0	0	1	0	0	1	0	0	1	0	0	1
566	B2RRE0;Q9WTQ5;Q9WTQ5-2;Q6IR43	B2RRE0;Q9WTQ5;Q9WTQ5-2	A-kinase anchor protein 12	Akap12	tr|B2RRE0|B2RRE0_MOUSE A kinase (PRKA) anchor protein (Gravin) 12 OS=Mus musculus GN=Akap12 PE=2 SV=1;sp|Q9WTQ5|AKA12_MOUSE A-kinase anchor protein 12 OS=Mus musculus GN=Akap12 PE=1 SV=1;sp|Q9WTQ5-2|AKA12_MOUSE Isoform 2 of A-kinase anchor protein 12 OS=Mu	11171000000	11298000000	10883000000	433150000	145080000	146730000	141340000	11961000000	13192000000	12306000000	62	62	62	58.3	58.3	58.3	180.69	0	323.31	33353000000	307	106	104	97	55	54	51	55	54	51	55	54	51
567	K3W4L0;B2RRE2;E9QAX2;Q9JMH9-1;Q9JMH9;Q9JMH9-6;Q9JMH9-4;E9Q405;Q9JMH9-5;Q9JMH9-7;Q9JMH9-2;E9QA74;Q3UIM4;Q6PER1	K3W4L0;B2RRE2;E9QAX2;Q9JMH9-1;Q9JMH9;Q9JMH9-6;Q9JMH9-4;E9Q405;Q9JMH9-5;Q9JMH9-7;Q9JMH9-2;E9QA74	Unconventional myosin-XVIIIa	Myo18a	tr|K3W4L0|K3W4L0_MOUSE Unconventional myosin-XVIIIa OS=Mus musculus GN=Myo18a PE=1 SV=1;tr|B2RRE2|B2RRE2_MOUSE Myo18a protein OS=Mus musculus GN=Myo18a PE=1 SV=1;tr|E9QAX2|E9QAX2_MOUSE Unconventional myosin-XVIIIa OS=Mus musculus GN=Myo18a PE=1 SV=1;sp|Q9J	1779100000	2114800000	2381400000	45805000	12986000	15436000	17382000	2313600000	2406900000	2331700000	48	48	48	30.9	30.9	30.9	230.99	0	146.52	6275300000	128	37	44	47	35	36	38	35	36	38	35	36	38
568	B2RRE3;H7BX08;Q8C1B1;Q8C1B1-2	B2RRE3;H7BX08;Q8C1B1;Q8C1B1-2	Calmodulin-regulated spectrin-associated protein 2	Camsap2	tr|B2RRE3|B2RRE3_MOUSE Camsap1l1 protein OS=Mus musculus GN=Camsap2 PE=2 SV=1;tr|H7BX08|H7BX08_MOUSE Calmodulin-regulated spectrin-associated protein 2 OS=Mus musculus GN=Camsap2 PE=1 SV=1;sp|Q8C1B1|CAMP2_MOUSE Calmodulin-regulated spectrin-associated prot	365130000	320050000	313480000	11348000	4149200	3636900	3562300	426830000	431510000	436030000	17	17	17	18.7	18.7	18.7	165.66	0	40.524	998660000	37	11	14	12	12	13	11	12	13	11	12	13	11
569	B2RRE7;G3UXQ0;G3UXM1	B2RRE7	OTU domain-containing protein 4	Otud4	sp|B2RRE7|OTUD4_MOUSE OTU domain-containing protein 4 OS=Mus musculus GN=Otud4 PE=1 SV=1	824740000	762450000	884730000	45776000	15273000	14119000	16384000	907970000	954520000	923680000	19	19	19	25.2	25.2	25.2	123.05	0	51.291	2471900000	50	18	17	15	14	13	13	14	13	13	14	13	13
570	B2RRE8;Q9JLQ0	B2RRE8;Q9JLQ0	CD2-associated protein	Cd2ap	tr|B2RRE8|B2RRE8_MOUSE CD2-associated protein OS=Mus musculus GN=Cd2ap PE=2 SV=1;sp|Q9JLQ0|CD2AP_MOUSE CD2-associated protein OS=Mus musculus GN=Cd2ap PE=1 SV=3	1187800000	1338600000	1064200000	87575000	28971000	32649000	25955000	1373700000	1431100000	1382700000	21	21	21	41.9	41.9	41.9	70.431	0	48.678	3590600000	65	24	22	19	16	16	17	16	16	17	16	16	17
571	B2RRF0;P35822;Q99KV5;Q8C819;Q8C462	B2RRF0;P35822	Protein-tyrosine-phosphatase;Receptor-type tyrosine-protein phosphatase kappa	Ptprk	tr|B2RRF0|B2RRF0_MOUSE Ptprk protein OS=Mus musculus GN=Ptprk PE=2 SV=1;sp|P35822|PTPRK_MOUSE Receptor-type tyrosine-protein phosphatase kappa OS=Mus musculus GN=Ptprk PE=1 SV=1	139220000	125730000	39268000	4111000	1881300	1699100	530650	177850000	106360000	0	4	3	3	3.7	2.9	2.9	163	0	4.4754	304220000	4	2	2	0	2	2	2	2	2	1	2	2	1
572	B2RRF3;Q8C341;Q8C341-2	B2RRF3;Q8C341;Q8C341-2	SUN domain-containing ossification factor	Suco	tr|B2RRF3|B2RRF3_MOUSE AI848100 protein OS=Mus musculus GN=Suco PE=2 SV=1;sp|Q8C341|SUCO_MOUSE SUN domain-containing ossification factor OS=Mus musculus GN=Suco PE=1 SV=3;sp|Q8C341-2|SUCO_MOUSE Isoform 2 of SUN domain-containing ossification factor OS=Mus	18249000	38530000	19735000	1177100	280760	592760	303610	27731000	32298000	29073000	1	1	1	0.9	0.9	0.9	139.53	0.0028367	1.7032	76514000	3	1	1	1	1	1	1	1	1	1	1	1	1
573	B2RRH9;Q3THK7	B2RRH9;Q3THK7	GMP synthase [glutamine-hydrolyzing]	Gmps	tr|B2RRH9|B2RRH9_MOUSE Guanine monphosphate synthetase OS=Mus musculus GN=Gmps PE=2 SV=1;sp|Q3THK7|GUAA_MOUSE GMP synthase [glutamine-hydrolyzing] OS=Mus musculus GN=Gmps PE=1 SV=2	8903300000	7859500000	9693600000	539930000	181700000	160400000	197830000	9485900000	9256900000	10535000000	37	37	37	70.4	70.4	70.4	76.723	0	240.01	26456000000	195	65	65	65	33	35	32	33	35	32	33	35	32
574	B2RRI2;Q689Z5;Q689Z5-2;Q3TMM7;I6L981;Q3UPW9;A0JLU6;Q7TNB8-2;Q7TNB8;Q7TNB8-3;Q8R594	B2RRI2;Q689Z5;Q689Z5-2;Q3TMM7;I6L981	Protein strawberry notch homolog 1	Sbno1	tr|B2RRI2|B2RRI2_MOUSE Protein strawberry notch homolog 1 OS=Mus musculus GN=Sbno1 PE=2 SV=1;sp|Q689Z5|SBNO1_MOUSE Protein strawberry notch homolog 1 OS=Mus musculus GN=Sbno1 PE=1 SV=2;sp|Q689Z5-2|SBNO1_MOUSE Isoform 2 of Protein strawberry notch homolog 1	563210000	552450000	635220000	23038000	7410600	7269100	8358100	653470000	759000000	726880000	21	21	21	22.8	22.8	22.8	153.92	0	34.288	1750900000	53	20	15	18	17	12	14	17	12	14	17	12	14
575	B2RRM5;Q3V009;Q05DM6;Q3V009-2	B2RRM5;Q3V009;Q05DM6;Q3V009-2	Transmembrane emp24 domain-containing protein 1	Tmed1	tr|B2RRM5|B2RRM5_MOUSE Transmembrane emp24 domain containing 1 OS=Mus musculus GN=Tmed1 PE=2 SV=1;sp|Q3V009|TMED1_MOUSE Transmembrane emp24 domain-containing protein 1 OS=Mus musculus GN=Tmed1 PE=2 SV=1;tr|Q05DM6|Q05DM6_MOUSE Tmed1 protein OS=Mus musculus	0	257460000	341070000	99756000	0	42910000	56846000	0	303610000	412960000	2	2	2	13.2	13.2	13.2	25.262	0	6.3283	598540000	6	0	3	3	0	2	2	0	2	2	0	2	2
576	B2RRR9;Q8BHC9	B2RRR9;Q8BHC9	Alpha-(1,3)-fucosyltransferase 11	Fut11	tr|B2RRR9|B2RRR9_MOUSE Fucosyltransferase 11 OS=Mus musculus GN=Fut11 PE=2 SV=1;sp|Q8BHC9|FUT11_MOUSE Alpha-(1,3)-fucosyltransferase 11 OS=Mus musculus GN=Fut11 PE=1 SV=1	12158000	123910000	267950000	13932000	419240	4272800	9239700	41302000	143170000	254660000	5	5	5	14.5	14.5	14.5	55.532	0	8.2924	404020000	13	2	5	6	2	4	5	2	4	5	2	4	5
577	B2RRS4;E9PWV7;Q923K4;Q8C1M1;D6RDC6;Q923K4-2	B2RRS4;E9PWV7;Q923K4	tRNA modification GTPase GTPBP3, mitochondrial	Gtpbp3	tr|B2RRS4|B2RRS4_MOUSE GTP binding protein 3 OS=Mus musculus GN=Gtpbp3 PE=2 SV=1;tr|E9PWV7|E9PWV7_MOUSE tRNA modification GTPase GTPBP3, mitochondrial OS=Mus musculus GN=Gtpbp3 PE=3 SV=1;sp|Q923K4|GTPB3_MOUSE tRNA modification GTPase GTPBP3, mitochondrial	24077000	33950000	12373000	3200000	1094400	1543200	562390	29741000	32952000	18139000	4	4	4	12.4	12.4	12.4	52.175	0	5.9781	70400000	6	1	3	2	2	3	2	2	3	2	2	3	2
578	D3Z4U0;B2RRT9;D3Z4T9;Q9R020;E9PUD0;Q9R020-2;V9GX51	D3Z4U0;B2RRT9;D3Z4T9;Q9R020;E9PUD0;Q9R020-2	Zinc finger Ran-binding domain-containing protein 2	Zranb2	tr|D3Z4U0|D3Z4U0_MOUSE Zinc finger Ran-binding domain-containing protein 2 OS=Mus musculus GN=Zranb2 PE=1 SV=1;tr|B2RRT9|B2RRT9_MOUSE Zinc finger Ran-binding domain-containing protein 2 OS=Mus musculus GN=Zranb2 PE=2 SV=1;tr|D3Z4T9|D3Z4T9_MOUSE Zinc finger	345410000	556780000	421070000	63013000	16448000	26514000	20051000	558140000	590180000	572160000	6	6	6	20.6	20.6	20.6	37.294	0	10.318	1323300000	17	4	8	5	4	6	4	4	6	4	4	6	4
579	B2RRW5;Q8CEF1	B2RRW5;Q8CEF1	Protein fem-1 homolog C	Fem1c	tr|B2RRW5|B2RRW5_MOUSE Fem-1 homolog c (C.elegans) OS=Mus musculus GN=Fem1c PE=2 SV=1;sp|Q8CEF1|FEM1C_MOUSE Protein fem-1 homolog C OS=Mus musculus GN=Fem1c PE=2 SV=1	13867000	6322900	11649000	884410	385180	175640	323590	17907000	6769000	14920000	1	1	1	2.3	2.3	2.3	68.578	0.00032315	2.8314	31839000	2	1	0	1	1	1	1	1	1	1	1	1	1
580	Q3UAF7;Q3UAF6;Q3U5R4;B2RRX1;P60710;Q3UA89;Q3U939;Q3U804;Q3UGS0;Q3UAA9;Q61276;Q3TIJ9;Q3UCF8;E9Q1F2;G3UZ07;A1E281;E9Q606;Q99NC5;F8WGM8;E9Q2D1;Q6IWE2;F6WX90;Q7M0E4;Q6GQT3;E9Q3M9	Q3UAF7;Q3UAF6;Q3U5R4;B2RRX1;P60710;Q3UA89;Q3U939;Q3U804;Q3UGS0;Q3UAA9;Q61276;Q3TIJ9;Q3UCF8;E9Q1F2;G3UZ07	Actin, cytoplasmic 1;Actin, cytoplasmic 1, N-terminally processed	Actb;Actg1	tr|Q3UAF7|Q3UAF7_MOUSE Putative uncharacterized protein OS=Mus musculus GN=Actb PE=2 SV=1;tr|Q3UAF6|Q3UAF6_MOUSE Putative uncharacterized protein OS=Mus musculus GN=Actb PE=2 SV=1;tr|Q3U5R4|Q3U5R4_MOUSE Putative uncharacterized protein OS=Mus musculus GN=A	0	0	0	0	0	0	0	0	0	0	25	1	0	72	4.5	0	41.75	0	56.477	0	0	0	0	0	24	23	24	1	1	1	0	0	0
581	B2RRY4;Q9JLB2	B2RRY4;Q9JLB2	MAGUK p55 subfamily member 5	Mpp5	tr|B2RRY4|B2RRY4_MOUSE Membrane protein, palmitoylated 5 (MAGUK p55 subfamily member 5) OS=Mus musculus GN=Mpp5 PE=2 SV=1;sp|Q9JLB2|MPP5_MOUSE MAGUK p55 subfamily member 5 OS=Mus musculus GN=Mpp5 PE=1 SV=1	65525000	41963000	52127000	3893000	1598200	1023500	1271400	55131000	54871000	55454000	3	3	3	7.3	7.3	7.3	77.229	0	5.5199	159610000	6	2	2	2	2	2	2	2	2	2	2	2	2
582	B2RRZ7;Q3U0V2;I6L995;D6RCI0;D6RGL2	B2RRZ7;Q3U0V2	Tumor necrosis factor receptor type 1-associated DEATH domain protein	Tradd	tr|B2RRZ7|B2RRZ7_MOUSE TNFRSF1A-associated via death domain OS=Mus musculus GN=Tradd PE=2 SV=1;sp|Q3U0V2|TRADD_MOUSE Tumor necrosis factor receptor type 1-associated DEATH domain protein OS=Mus musculus GN=Tradd PE=1 SV=1	336250000	369420000	600350000	72556000	18680000	20523000	33353000	470280000	435460000	527940000	7	7	7	35.2	35.2	35.2	34.577	0	47.274	1306000000	28	7	9	12	5	5	7	5	5	7	5	5	7
583	B2RS09;Q7JJ13;Q7JJ13-2;U3KLT0;I7HPW1;G3UZR9;Q3TH63;S4R1Z1	B2RS09;Q7JJ13;Q7JJ13-2;U3KLT0;I7HPW1	Bromodomain-containing protein 2	Brd2	tr|B2RS09|B2RS09_MOUSE Bromodomain containing 2 OS=Mus musculus GN=Brd2 PE=2 SV=1;sp|Q7JJ13|BRD2_MOUSE Bromodomain-containing protein 2 OS=Mus musculus GN=Brd2 PE=1 SV=1;sp|Q7JJ13-2|BRD2_MOUSE Isoform 2 of Bromodomain-containing protein 2 OS=Mus musculus G	1356600000	1120800000	1488200000	107180000	36665000	30291000	40223000	1357200000	1559700000	1630800000	19	19	15	28.9	28.9	25.2	88.066	0	67.959	3965600000	64	23	20	21	17	14	16	17	14	16	13	12	15
584	Q8C4Y1;B2RS19;P28574	Q8C4Y1;B2RS19;P28574	Protein max	Max	tr|Q8C4Y1|Q8C4Y1_MOUSE Max protein OS=Mus musculus GN=Max PE=2 SV=1;tr|B2RS19|B2RS19_MOUSE Max protein OS=Mus musculus GN=Max PE=2 SV=1;sp|P28574|MAX_MOUSE Protein max OS=Mus musculus GN=Max PE=1 SV=1	130970000	132200000	154870000	41804000	13097000	13220000	15487000	164050000	153790000	177230000	2	2	2	20.5	20.5	20.5	17.171	0.00016875	3.4749	418040000	7	3	2	2	2	2	2	2	2	2	2	2	2
585	Q3TMB5;B2RS30;Q9Z1Y4	Q3TMB5;B2RS30;Q9Z1Y4	Thyroid receptor-interacting protein 6	Trip6	tr|Q3TMB5|Q3TMB5_MOUSE Putative uncharacterized protein OS=Mus musculus GN=Trip6 PE=2 SV=1;tr|B2RS30|B2RS30_MOUSE Thyroid hormone receptor interactor 6 OS=Mus musculus GN=Trip6 PE=2 SV=1;sp|Q9Z1Y4|TRIP6_MOUSE Thyroid receptor-interacting protein 6 OS=Mus m	521480000	639810000	543450000	60884000	18624000	22850000	19409000	704890000	629850000	630160000	13	13	13	54.4	54.4	54.4	50.73	0	31.795	1704700000	45	14	16	15	10	13	12	10	13	12	10	13	12
586	B2RS36;Q5EE38;Q5EE38-4;Q5EE38-3;Q5EE38-2	B2RS36;Q5EE38	Adrenocortical dysplasia protein	Acd	tr|B2RS36|B2RS36_MOUSE Adrenocortical dysplasia OS=Mus musculus GN=Acd PE=2 SV=1;sp|Q5EE38|ACD_MOUSE Adrenocortical dysplasia protein OS=Mus musculus GN=Acd PE=1 SV=1	23717000	157970000	31343000	10651000	1185800	7898400	1567100	60888000	103990000	84639000	4	4	4	18.3	18.3	18.3	44.713	0.00017079	3.7187	213030000	6	1	3	2	1	4	2	1	4	2	1	4	2
587	B2RS41;Q8BWF0	B2RS41;Q8BWF0	Succinate-semialdehyde dehydrogenase, mitochondrial	Aldh5a1	tr|B2RS41|B2RS41_MOUSE Aldhehyde dehydrogenase family 5, subfamily A1 OS=Mus musculus GN=Aldh5a1 PE=2 SV=1;sp|Q8BWF0|SSDH_MOUSE Succinate-semialdehyde dehydrogenase, mitochondrial OS=Mus musculus GN=Aldh5a1 PE=1 SV=1	1164000000	1599000000	1037300000	118760000	36376000	49970000	32415000	1520500000	1449200000	1463700000	12	12	12	34.4	34.4	34.4	55.968	0	37.955	3800400000	48	15	16	17	10	10	10	10	10	10	10	10	10
588	B2RS43;Q9Z1R4	B2RS43;Q9Z1R4	Uncharacterized protein C6orf47 homolog	D17H6S53E;D17h6s53e	tr|B2RS43|B2RS43_MOUSE DNA segment, Chr 17, human D6S53E OS=Mus musculus GN=D17H6S53E PE=2 SV=1;sp|Q9Z1R4|CF047_MOUSE Uncharacterized protein C6orf47 homolog OS=Mus musculus GN=D17h6s53e PE=2 SV=1	145460000	146100000	93972000	32127000	12121000	12175000	7831000	143420000	169990000	156360000	4	4	4	16.4	16.4	16.4	32.014	0	6.8026	385530000	9	4	3	2	4	3	2	4	3	2	4	3	2
589	B2RS85;Q9QXV8	B2RS85;Q9QXV8	Protein sprouty homolog 2	Spry2	tr|B2RS85|B2RS85_MOUSE Sprouty homolog 2 (Drosophila) OS=Mus musculus GN=Spry2 PE=2 SV=1;sp|Q9QXV8|SPY2_MOUSE Protein sprouty homolog 2 OS=Mus musculus GN=Spry2 PE=2 SV=1	15925000	50978000	15027000	4096500	796260	2548900	751350	42278000	38403000	39565000	3	3	3	15.6	15.6	15.6	34.623	0	5.5381	81930000	4	1	2	1	2	2	2	2	2	2	2	2	2
590	B2RS91	B2RS91	RNA polymerase I-specific transcription initiation factor RRN3	Rrn3	sp|B2RS91|RRN3_MOUSE RNA polymerase I-specific transcription initiation factor RRN3 OS=Mus musculus GN=Rrn3 PE=1 SV=1	7136900	33440000	34407000	1874600	178420	836000	860170	32018000	32645000	23782000	5	5	5	7	7	7	74.517	0	6.1727	74984000	10	2	4	4	2	4	4	2	4	4	2	4	4
591	B2RSC8;P46935;Q3TUU1;Q3V335;V9GWV8;A0JNZ0;V9GXK3;Q8BNU7;V9GXS6	B2RSC8;P46935	E3 ubiquitin-protein ligase NEDD4	Nedd4	tr|B2RSC8|B2RSC8_MOUSE E3 ubiquitin-protein ligase OS=Mus musculus GN=Nedd4 PE=2 SV=1;sp|P46935|NEDD4_MOUSE E3 ubiquitin-protein ligase NEDD4 OS=Mus musculus GN=Nedd4 PE=1 SV=3	11198000000	10703000000	12655000000	751230000	243440000	232680000	275110000	13273000000	13253000000	13714000000	40	35	34	54.7	48.6	47.7	102.71	0	265.83	34557000000	244	73	85	86	35	37	36	32	33	33	31	32	32
592	E9Q4A5;B2RSE6;Q3TL26	E9Q4A5;B2RSE6;Q3TL26	Dimethyladenosine transferase 2, mitochondrial	Gm1818;Tfb2m	tr|E9Q4A5|E9Q4A5_MOUSE Protein Gm1818 OS=Mus musculus GN=Gm1818 PE=4 SV=1;tr|B2RSE6|B2RSE6_MOUSE Transcription factor B2, mitochondrial OS=Mus musculus GN=Tfb2m PE=2 SV=1;sp|Q3TL26|TFB2M_MOUSE Dimethyladenosine transferase 2, mitochondrial OS=Mus musculus	83869000	61583000	152200000	11448000	3225700	2368600	5853800	136420000	78404000	158720000	5	5	5	19.4	19.4	19.4	45.862	0	14.928	297650000	9	3	3	3	4	3	2	4	3	2	4	3	2
593	B7ZNV0;B2RSG2;O35980	B7ZNV0;B2RSG2;O35980	Endonuclease III-like protein 1	Nthl1	tr|B7ZNV0|B7ZNV0_MOUSE Nthl1 protein (Fragment) OS=Mus musculus GN=Nthl1 PE=2 SV=1;tr|B2RSG2|B2RSG2_MOUSE Nth (Endonuclease III)-like 1 (E.coli) OS=Mus musculus GN=Nthl1 PE=2 SV=1;sp|O35980|NTH_MOUSE Endonuclease III-like protein 1 OS=Mus musculus GN=Nthl1	0	6881200	0	430070	0	430070	0	0	7174800	0	1	1	1	7.5	7.5	7.5	31.603	0.0021244	2.0031	6881200	1	0	1	0	0	1	0	0	1	0	0	1	0
594	B2RSN3;Q9CWF2;Q99J49;G3UZR1;Q62363	B2RSN3;Q9CWF2;Q99J49	Tubulin beta-2B chain	Tubb2b;Tubb2a	tr|B2RSN3|B2RSN3_MOUSE MCG1395 OS=Mus musculus GN=Tubb2b PE=2 SV=1;sp|Q9CWF2|TBB2B_MOUSE Tubulin beta-2B chain OS=Mus musculus GN=Tubb2b PE=1 SV=1;tr|Q99J49|Q99J49_MOUSE Tubb2a protein (Fragment) OS=Mus musculus GN=Tubb2a PE=2 SV=1	8597700000	3821400000	6738700000	870810000	390800000	173700000	306300000	6226500000	7520900000	6544500000	27	7	1	77.8	24.3	2.7	49.953	0	67.101	19158000000	85	35	21	29	26	25	27	7	6	7	1	1	1
595	B2RSR7;Q3ULJ0;Q3ULJ0-2;D3Z0L6;E0CXN5;P13707	B2RSR7;Q3ULJ0;Q3ULJ0-2	Glycerol-3-phosphate dehydrogenase [NAD(+)];Glycerol-3-phosphate dehydrogenase 1-like protein	Gpd1l	tr|B2RSR7|B2RSR7_MOUSE Glycerol-3-phosphate dehydrogenase 1-like OS=Mus musculus GN=Gpd1l PE=2 SV=1;sp|Q3ULJ0|GPD1L_MOUSE Glycerol-3-phosphate dehydrogenase 1-like protein OS=Mus musculus GN=Gpd1l PE=1 SV=2;sp|Q3ULJ0-2|GPD1L_MOUSE Isoform 2 of Glycerol-3-p	489190000	591800000	536740000	62220000	18815000	22762000	20644000	581470000	606390000	629490000	12	12	12	45.9	45.9	45.9	38.225	0	25.348	1617700000	29	9	11	9	9	11	7	9	11	7	9	11	7
596	Q3U202;B2RSU4;Q80V62;Q3UQJ0;Q3TLN3;F7CAP1;Q80V62-2	Q3U202;B2RSU4;Q80V62;Q3UQJ0;Q3TLN3	Fanconi anemia group D2 protein homolog	Fancd2	tr|Q3U202|Q3U202_MOUSE Putative uncharacterized protein (Fragment) OS=Mus musculus GN=Fancd2 PE=2 SV=1;tr|B2RSU4|B2RSU4_MOUSE Fanconi anemia, complementation group D2 OS=Mus musculus GN=Fancd2 PE=2 SV=1;sp|Q80V62|FACD2_MOUSE Fanconi anemia group D2 protein	366190000	166890000	140440000	8747000	4755700	2167400	1823900	291150000	236310000	299800000	14	14	14	14.8	14.8	14.8	161.29	0	25.279	673520000	24	9	7	8	9	7	8	9	7	8	9	7	8
597	E9PY46;B2RSU5;Q6ZQ91;Q2XQY6;E9Q682;Q3TQ94;Q6RUU2;Q3TA81;Q91VU5;E9Q925	E9PY46;B2RSU5;Q6ZQ91;Q2XQY6;E9Q682;Q3TQ94;Q6RUU2;Q3TA81		Ift140	tr|E9PY46|E9PY46_MOUSE Protein Ift140 OS=Mus musculus GN=Ift140 PE=4 SV=1;tr|B2RSU5|B2RSU5_MOUSE Intraflagellar transport 140 homolog (Chlamydomonas) OS=Mus musculus GN=Ift140 PE=2 SV=1;tr|Q6ZQ91|Q6ZQ91_MOUSE MKIAA0590 protein (Fragment) OS=Mus musculus GN	308860000	128360000	366830000	9241800	3550100	1475300	4216400	295130000	313010000	353240000	11	11	11	11	11	11	165.87	0	12.822	804040000	20	9	4	7	9	4	8	9	4	8	9	4	8
598	E9PWI6;B2RSU7;Q8CHG3;E0CYI9;Q3UFV3;Q6P0A4;E0CY89;F6UT01	E9PWI6;B2RSU7;Q8CHG3;E0CYI9	GRIP and coiled-coil domain-containing protein 2	Gcc2	tr|E9PWI6|E9PWI6_MOUSE GRIP and coiled-coil domain-containing protein 2 OS=Mus musculus GN=Gcc2 PE=4 SV=1;tr|B2RSU7|B2RSU7_MOUSE GRIP and coiled-coil domain containing 2 OS=Mus musculus GN=Gcc2 PE=2 SV=1;sp|Q8CHG3|GCC2_MOUSE GRIP and coiled-coil domain-con	448700000	391270000	720540000	12484000	3589600	3130200	5764300	567800000	658800000	631030000	23	23	23	17.3	17.3	17.3	190.73	0	52.859	1560500000	45	13	12	20	14	14	21	14	14	21	14	14	21
599	B2RSV4;Q921M3;Q921M3-2	B2RSV4;Q921M3;Q921M3-2	Splicing factor 3B subunit 3	Sf3b3	tr|B2RSV4|B2RSV4_MOUSE Splicing factor 3b, subunit 3 OS=Mus musculus GN=Sf3b3 PE=2 SV=1;sp|Q921M3|SF3B3_MOUSE Splicing factor 3B subunit 3 OS=Mus musculus GN=Sf3b3 PE=2 SV=1;sp|Q921M3-2|SF3B3_MOUSE Isoform 2 of Splicing factor 3B subunit 3 OS=Mus musculus	14697000000	11282000000	14343000000	672030000	244940000	188040000	239040000	15737000000	16610000000	16860000000	46	46	46	54.4	54.4	54.4	135.55	0	311.35	40322000000	271	103	80	88	44	38	43	44	38	43	44	38	43
600	B2RSW8;Q9R0L6;Q9R0L6-2	B2RSW8;Q9R0L6;Q9R0L6-2	Pericentriolar material 1 protein	Pcm1	tr|B2RSW8|B2RSW8_MOUSE Pericentriolar material 1 OS=Mus musculus GN=Pcm1 PE=2 SV=1;sp|Q9R0L6|PCM1_MOUSE Pericentriolar material 1 protein OS=Mus musculus GN=Pcm1 PE=1 SV=2;sp|Q9R0L6-2|PCM1_MOUSE Isoform 2 of Pericentriolar material 1 protein OS=Mus musculu	1219700000	1034800000	1198700000	33527000	11842000	10047000	11638000	1527100000	1373100000	1417800000	33	33	33	24.2	24.2	24.2	228.83	0	74.116	3453200000	98	32	30	36	24	23	25	24	23	25	24	23	25
601	B2RT77;Q78WZ7	B2RT77;Q78WZ7	DNA-directed RNA polymerase I subunit RPA43	Twistnb	tr|B2RT77|B2RT77_MOUSE TWIST neighbor OS=Mus musculus GN=Twistnb PE=2 SV=1;sp|Q78WZ7|RPA43_MOUSE DNA-directed RNA polymerase I subunit RPA43 OS=Mus musculus GN=Twistnb PE=1 SV=1	186320000	191680000	152570000	37898000	13308000	13692000	10898000	270800000	239060000	218740000	5	5	5	27.3	27.3	27.3	36.721	0	26.38	530570000	10	4	3	3	4	4	3	4	4	3	4	4	3
602	B2RT97;Q9WVJ2;E9Q5I9;E9Q0U1;F6ZQQ3;F6PXS6;E9PY93	B2RT97;Q9WVJ2;E9Q5I9	26S proteasome non-ATPase regulatory subunit 13	Psmd13	tr|B2RT97|B2RT97_MOUSE Proteasome (Prosome, macropain) 26S subunit, non-ATPase, 13 OS=Mus musculus GN=Psmd13 PE=2 SV=1;sp|Q9WVJ2|PSD13_MOUSE 26S proteasome non-ATPase regulatory subunit 13 OS=Mus musculus GN=Psmd13 PE=1 SV=1;tr|E9Q5I9|E9Q5I9_MOUSE 26S prot	9359000000	9381300000	11480000000	1162300000	359960000	360820000	441530000	11258000000	12182000000	12510000000	23	23	23	68.1	68.1	68.1	42.809	0	103.24	30220000000	165	57	57	51	21	21	22	21	21	22	21	21	22
603	B2RTB0;Q3UHX2;Q1WWJ8	B2RTB0;Q3UHX2;Q1WWJ8	28 kDa heat- and acid-stable phosphoprotein	Pdap1	tr|B2RTB0|B2RTB0_MOUSE MCG17262 OS=Mus musculus GN=Pdap1 PE=2 SV=1;sp|Q3UHX2|HAP28_MOUSE 28 kDa heat- and acid-stable phosphoprotein OS=Mus musculus GN=Pdap1 PE=1 SV=1;tr|Q1WWJ8|Q1WWJ8_MOUSE Pdap1 protein (Fragment) OS=Mus musculus GN=Pdap1 PE=2 SV=1	2504500000	2733000000	4319000000	1061800000	278280000	303660000	479890000	2922600000	3307900000	3710400000	10	10	10	39.2	39.2	39.2	20.605	0	54.93	9556500000	70	24	19	27	9	10	9	9	10	9	9	10	9
604	B2RTC8;Q3V132	B2RTC8;Q3V132	ADP/ATP translocase 4;ADP/ATP translocase 4, N-terminally processed	Slc25a31	tr|B2RTC8|B2RTC8_MOUSE Solute carrier family 25 (Mitochondrial carrier adenine nucleotide translocator), member 31 OS=Mus musculus GN=Slc25a31 PE=2 SV=1;sp|Q3V132|ADT4_MOUSE ADP/ATP translocase 4 OS=Mus musculus GN=Slc25a31 PE=2 SV=1	54585000	38114000	0	4030400	2373300	1657100	0	95142000	36111000	0	6	2	2	14.4	5	5	35.257	1	-2	92699000	3	1	2	0	5	6	3	2	2	0	2	2	0
605	Q6P3C9;B2RTD7;Q9D5V2	Q6P3C9;B2RTD7;Q9D5V2	Kelch-like protein 10	Klhl10	tr|Q6P3C9|Q6P3C9_MOUSE Kelch-like protein 10 OS=Mus musculus GN=Klhl10 PE=2 SV=1;tr|B2RTD7|B2RTD7_MOUSE Kelch-like 10 (Drosophila) OS=Mus musculus GN=Klhl10 PE=2 SV=1;sp|Q9D5V2|KLH10_MOUSE Kelch-like protein 10 OS=Mus musculus GN=Klhl10 PE=1 SV=1	0	0	0	0	0	0	0	0	0	0	1	1	1	8.1	8.1	8.1	30.876	0.0037026	1.5536	0	0	0	0	0	1	0	1	1	0	1	1	0	1
606	B2RTE3;Q4FK66;Q4FK66-2	B2RTE3;Q4FK66	Pre-mRNA-splicing factor 38A	Prpf38a	tr|B2RTE3|B2RTE3_MOUSE MCG17981 OS=Mus musculus GN=Prpf38a PE=2 SV=1;sp|Q4FK66|PR38A_MOUSE Pre-mRNA-splicing factor 38A OS=Mus musculus GN=Prpf38a PE=1 SV=1	1352100000	1226200000	1845200000	294900000	90138000	81747000	123010000	1708000000	1530600000	1676000000	12	12	12	28.5	28.5	28.5	37.436	0	45.988	4423400000	36	10	11	15	8	9	12	8	9	12	8	9	12
607	B2RTG9;Q9D011;J3QQ10	B2RTG9;Q9D011;J3QQ10	M-phase-specific PLK1-interacting protein	Mplkip;Gm7102	tr|B2RTG9|B2RTG9_MOUSE RIKEN cDNA 2810021B07 OS=Mus musculus GN=Mplkip PE=2 SV=1;sp|Q9D011|MPLKI_MOUSE M-phase-specific PLK1-interacting protein OS=Mus musculus GN=Mplkip PE=2 SV=1;tr|J3QQ10|J3QQ10_MOUSE Protein Gm7102 OS=Mus musculus GN=Gm7102 PE=4 SV=1	59447000	46737000	62387000	18730000	6605200	5193000	6931900	70152000	65094000	72298000	2	2	2	22.5	22.5	22.5	19.06	0	7.6043	168570000	7	2	2	3	2	2	2	2	2	2	2	2	2
608	Q3UEU2;B2RTJ8;O35710-2;O35710	Q3UEU2;B2RTJ8;O35710-2;O35710	Nocturnin	Ccrn4l	tr|Q3UEU2|Q3UEU2_MOUSE Putative uncharacterized protein OS=Mus musculus GN=Ccrn4l PE=2 SV=1;tr|B2RTJ8|B2RTJ8_MOUSE CCR4 carbon catabolite repression 4-like (S. cerevisiae) OS=Mus musculus GN=Ccrn4l PE=2 SV=1;sp|O35710-2|NOCT_MOUSE Isoform 2 of Nocturnin OS	209000000	187550000	270220000	22992000	7206900	6467100	9317900	275910000	254420000	310360000	8	8	7	24.2	24.2	22.8	48.27	0	12.972	666770000	23	10	6	7	7	6	6	7	6	6	6	5	5
609	B2RTK3;Q6ZWY9;Q64525;Q64478;P10854	B2RTK3;Q6ZWY9;Q64525;Q64478;P10854	Histone H2B;Histone H2B type 1-C/E/G;Histone H2B type 2-B;Histone H2B type 1-H;Histone H2B type 1-M	Hist1h2bm;Hist1h2bc;Hist2h2bb;Hist1h2bh	tr|B2RTK3|B2RTK3_MOUSE Histone H2B OS=Mus musculus GN=Hist1h2bm PE=2 SV=1;sp|Q6ZWY9|H2B1C_MOUSE Histone H2B type 1-C/E/G OS=Mus musculus GN=Hist1h2bc PE=1 SV=3;sp|Q64525|H2B2B_MOUSE Histone H2B type 2-B OS=Mus musculus GN=Hist2h2bb PE=1 SV=3;sp|Q64478|H2B1	41110000	55027000	43662000	12709000	3737300	5002500	3969300	41505000	57926000	41710000	9	1	1	57.9	5.6	5.6	13.936	1	-2	139800000	3	1	1	1	9	9	9	1	1	1	1	1	1
610	B2RTL2;O89084-3;O89084;Q3TUD0;O70285;C9K100;O89084-2	B2RTL2;O89084-3;O89084;Q3TUD0;O70285;C9K100;O89084-2	cAMP-specific 3,5-cyclic phosphodiesterase 4A	Pde4a	tr|B2RTL2|B2RTL2_MOUSE Phosphodiesterase 4A, cAMP specific OS=Mus musculus GN=Pde4a PE=2 SV=1;sp|O89084-3|PDE4A_MOUSE Isoform 3 of cAMP-specific 3,5-cyclic phosphodiesterase 4A OS=Mus musculus GN=Pde4a;sp|O89084|PDE4A_MOUSE cAMP-specific 3,5-cyclic pho	460920000	7178800	16951000	11280000	10719000	166950	394200	0	7685300	0	4	4	4	9.6	9.6	9.6	93.557	0.00032873	3.0438	485050000	3	1	1	1	1	1	2	1	1	2	1	1	2
611	B2RTM0;P62806;Q61667;Q6B822	B2RTM0;P62806;Q61667	Histone H4	Hist2h4;Hist1h4a	tr|B2RTM0|B2RTM0_MOUSE Histone H4 OS=Mus musculus GN=Hist2h4 PE=2 SV=1;sp|P62806|H4_MOUSE Histone H4 OS=Mus musculus GN=Hist1h4a PE=1 SV=2;tr|Q61667|Q61667_MOUSE Histone H4 (Fragment) OS=Mus musculus PE=3 SV=1	220210000000	235210000000	273920000000	121560000000	36702000000	39201000000	45653000000	237090000000	252420000000	223280000000	14	14	14	68	68	68	11.367	0	65.713	729340000000	1151	387	382	382	13	13	13	13	13	13	13	13	13
612	B2RTN5;Q91YM2;Q3TSU7;Q3UVZ8;Q5U612	B2RTN5;Q91YM2;Q3TSU7	Rho GTPase-activating protein 35	Arhgap35	tr|B2RTN5|B2RTN5_MOUSE Glucocorticoid receptor DNA binding factor 1 OS=Mus musculus GN=Arhgap35 PE=2 SV=1;sp|Q91YM2|RHG35_MOUSE Rho GTPase-activating protein 35 OS=Mus musculus GN=Arhgap35 PE=1 SV=3;tr|Q3TSU7|Q3TSU7_MOUSE Putative uncharacterized protein (	379720000	272770000	243070000	9950700	4219100	3030800	2700800	420670000	335720000	323960000	18	18	18	16.6	16.6	16.6	170.39	0	31.671	895560000	29	14	6	9	10	9	12	10	9	12	10	9	12
613	F8WHL1;B2RU82;Q5IRJ6;Q5IRJ6-2	F8WHL1;B2RU82;Q5IRJ6;Q5IRJ6-2	Zinc transporter 9	Slc30a9	tr|F8WHL1|F8WHL1_MOUSE Zinc transporter 9 OS=Mus musculus GN=Slc30a9 PE=4 SV=1;tr|B2RU82|B2RU82_MOUSE Solute carrier family 30 (Zinc transporter), member 9 OS=Mus musculus GN=Slc30a9 PE=2 SV=1;sp|Q5IRJ6|ZNT9_MOUSE Zinc transporter 9 OS=Mus musculus GN=Slc3	172490000	79994000	128460000	13605000	6160200	2856900	4587700	146390000	132150000	135240000	6	6	6	12.8	12.8	12.8	60.674	0	15.825	380940000	12	5	3	4	6	3	4	6	3	4	6	3	4
614	B2RUA5;Q7TSI3;Q8BNQ1	B2RUA5;Q7TSI3	Serine/threonine-protein phosphatase 6 regulatory subunit 1	Ppp6r1	tr|B2RUA5|B2RUA5_MOUSE SAPS domain family, member 1 OS=Mus musculus GN=Ppp6r1 PE=2 SV=1;sp|Q7TSI3|PP6R1_MOUSE Serine/threonine-protein phosphatase 6 regulatory subunit 1 OS=Mus musculus GN=Ppp6r1 PE=1 SV=1	100400000	83232000	340420000	14973000	2868600	2378100	9726200	170690000	116390000	288300000	6	6	6	10.3	10.3	10.3	94.555	0	11.498	524050000	12	3	3	6	3	4	5	3	4	5	3	4	5
615	B2RUC7;Q9Z1Z2	B2RUC7;Q9Z1Z2	Serine-threonine kinase receptor-associated protein	Strap	tr|B2RUC7|B2RUC7_MOUSE Serine/threonine kinase receptor associated protein OS=Mus musculus GN=Strap PE=2 SV=1;sp|Q9Z1Z2|STRAP_MOUSE Serine-threonine kinase receptor-associated protein OS=Mus musculus GN=Strap PE=1 SV=2	7417100000	7036700000	7891800000	931070000	309040000	293200000	328830000	8831100000	8711700000	9524700000	20	20	20	71.7	71.7	71.7	38.442	0	115.68	22346000000	182	60	62	60	20	19	19	20	19	19	20	19	19
616	B2RUE8;Q6ZQ68;B7ZNR9;F8VPL5;E9PVG7;B7ZNR8;P97820;Q61155;Q3UTY9;Q571L1	B2RUE8;Q6ZQ68;B7ZNR9;F8VPL5;E9PVG7;B7ZNR8;P97820	Mitogen-activated protein kinase kinase kinase kinase 4	Map4k4;mKIAA0687	tr|B2RUE8|B2RUE8_MOUSE Map4k4 protein OS=Mus musculus GN=Map4k4 PE=2 SV=1;tr|Q6ZQ68|Q6ZQ68_MOUSE MKIAA0687 protein (Fragment) OS=Mus musculus GN=mKIAA0687 PE=4 SV=1;tr|B7ZNR9|B7ZNR9_MOUSE Map4k4 protein OS=Mus musculus GN=Map4k4 PE=2 SV=1;tr|F8VPL5|F8VPL5_	193320000	97078000	53069000	5366600	3020600	1516800	829210	93777000	161130000	126650000	10	8	7	13.5	11.8	10.8	139.06	0	9.879	343460000	20	6	7	7	6	6	6	5	4	4	4	4	4
617	B2RUG4;Q61602;B7ZNV2	B2RUG4;Q61602;B7ZNV2	Transcriptional activator GLI3;Transcriptional repressor GLI3R	Gli3	tr|B2RUG4|B2RUG4_MOUSE GLI-Kruppel family member GLI3 OS=Mus musculus GN=Gli3 PE=2 SV=1;sp|Q61602|GLI3_MOUSE Transcriptional activator GLI3 OS=Mus musculus GN=Gli3 PE=1 SV=2;tr|B7ZNV2|B7ZNV2_MOUSE GLI-Kruppel family member GLI3 OS=Mus musculus GN=Gli3 PE=2	25065000	15849000	0	610660	374110	236550	0	35629000	0	0	2	2	2	3.4	3.4	3.4	171.65	0.0066929	1.3341	40914000	2	1	1	0	1	1	0	1	1	0	1	1	0
618	B2RUG7;O88532;F6QJP7;F6V459;D3Z5G4;D3Z7V6;F6RTK9	B2RUG7;O88532	Zinc finger RNA-binding protein	Zfr	tr|B2RUG7|B2RUG7_MOUSE Zinc finger RNA binding protein OS=Mus musculus GN=Zfr PE=2 SV=1;sp|O88532|ZFR_MOUSE Zinc finger RNA-binding protein OS=Mus musculus GN=Zfr PE=1 SV=2	3792300000	3492000000	3622900000	222600000	77394000	71265000	73938000	4110500000	4188200000	4104900000	36	36	36	52.9	52.9	52.9	114.45	0	194.33	10907000000	147	44	53	50	28	28	32	28	28	32	28	28	32
619	H7BWX5;B2RUH2;Q6GQW0	H7BWX5;B2RUH2;Q6GQW0	Ankyrin repeat and BTB/POZ domain-containing protein BTBD11	Btbd11	tr|H7BWX5|H7BWX5_MOUSE Ankyrin repeat and BTB/POZ domain-containing protein BTBD11 (Fragment) OS=Mus musculus GN=Btbd11 PE=4 SV=1;tr|B2RUH2|B2RUH2_MOUSE BTB (POZ) domain containing 11 OS=Mus musculus GN=Btbd11 PE=2 SV=1;sp|Q6GQW0|BTBDB_MOUSE Ankyrin repeat	26193000	32749000	18484000	2277200	770390	963200	543650	32732000	29005000	21154000	2	2	2	5.4	5.4	5.4	86.185	0	4.2319	77426000	3	1	1	1	1	2	1	1	2	1	1	2	1
620	B2RUJ4;Z4YKQ9;Q4QY64;Q4QY64-2	B2RUJ4;Z4YKQ9;Q4QY64;Q4QY64-2	ATPase family AAA domain-containing protein 5	Atad5	tr|B2RUJ4|B2RUJ4_MOUSE Atad5 protein OS=Mus musculus GN=Atad5 PE=2 SV=1;tr|Z4YKQ9|Z4YKQ9_MOUSE ATPase family AAA domain-containing protein 5 OS=Mus musculus GN=Atad5 PE=4 SV=1;sp|Q4QY64|ATAD5_MOUSE ATPase family AAA domain-containing protein 5 OS=Mus muscu	1728700000	2985800000	869180000	53178000	16464000	28436000	8277900	1922600000	1970500000	2023700000	12	12	12	8.6	8.6	8.6	197.98	0	7.9581	5583700000	22	6	8	8	5	8	7	5	8	7	5	8	7
621	Q5NCJ0;B2RUJ6;Q5NCJ1;Q3UPQ2;Q5DTR1;Q5NCJ4;Q5NCJ5;Q8R3E5;Q3TPI6;Q8VCK0;Q3TKC6;Q8BLC8;F7ACB1;Q8BX14;Q5NCJ2	Q5NCJ0;B2RUJ6;Q5NCJ1;Q3UPQ2;Q5DTR1;Q5NCJ4;Q5NCJ5;Q8R3E5		Rapgef6	tr|Q5NCJ0|Q5NCJ0_MOUSE Protein Rapgef6 OS=Mus musculus GN=Rapgef6 PE=4 SV=1;tr|B2RUJ6|B2RUJ6_MOUSE Rapgef6 protein OS=Mus musculus GN=Rapgef6 PE=2 SV=1;tr|Q5NCJ1|Q5NCJ1_MOUSE Protein Rapgef6 OS=Mus musculus GN=Rapgef6 PE=4 SV=1;tr|Q3UPQ2|Q3UPQ2_MOUSE Putat	0	25203000	19508000	508070	0	286400	221680	0	29579000	0	7	4	4	6	4.1	4.1	179.23	0.0016807	2.1058	44710000	4	0	3	1	3	5	3	0	3	1	0	3	1
622	B7ZNY4;B2RUK2;Q80TH2-1;Q80TH2;Q80TH2-2;B2RUJ2;B7ZNX6	B7ZNY4;B2RUK2;Q80TH2-1;Q80TH2;Q80TH2-2;B2RUJ2;B7ZNX6	Protein LAP2	Erbb2ip	tr|B7ZNY4|B7ZNY4_MOUSE Erbb2 interacting protein OS=Mus musculus GN=Erbb2ip PE=2 SV=1;tr|B2RUK2|B2RUK2_MOUSE Erbb2 interacting protein OS=Mus musculus GN=Erbb2ip PE=2 SV=1;sp|Q80TH2-1|LAP2_MOUSE Isoform 1 of Protein LAP2 OS=Mus musculus GN=Erbb2ip;sp|Q80TH	1511500000	914160000	928570000	36859000	16610000	10046000	10204000	1269800000	1265600000	1308100000	32	32	31	35.1	35.1	33.9	157.2	0	81.433	3354200000	79	32	24	23	26	24	20	26	24	20	25	23	19
623	B2RUK5;Q3ULD5;Q6PD20;Q8K1L7;Q9D2F6	B2RUK5;Q3ULD5;Q6PD20	Methylcrotonoyl-CoA carboxylase beta chain, mitochondrial	Mccc2	tr|B2RUK5|B2RUK5_MOUSE Methylcrotonoyl-Coenzyme A carboxylase 2 (Beta) OS=Mus musculus GN=Mccc2 PE=2 SV=1;sp|Q3ULD5|MCCB_MOUSE Methylcrotonoyl-CoA carboxylase beta chain, mitochondrial OS=Mus musculus GN=Mccc2 PE=1 SV=1;tr|Q6PD20|Q6PD20_MOUSE Mccc2 protein	820740000	700570000	751090000	71013000	25648000	21893000	23471000	867850000	847520000	811120000	14	14	14	35	35	35	61.378	0	55.663	2272400000	47	18	12	17	12	10	13	12	10	13	12	10	13
624	B2RUM8;Q8K363;Q9CSG7;F6ZX28;Q9CSJ2	B2RUM8;Q8K363	ATP-dependent RNA helicase DDX18	Ddx18	tr|B2RUM8|B2RUM8_MOUSE DEAD (Asp-Glu-Ala-Asp) box polypeptide 18 OS=Mus musculus GN=Ddx18 PE=2 SV=1;sp|Q8K363|DDX18_MOUSE ATP-dependent RNA helicase DDX18 OS=Mus musculus GN=Ddx18 PE=2 SV=1	2071300000	1662500000	2174500000	155480000	54508000	43749000	57224000	2561300000	2304100000	2349700000	24	24	24	50.5	50.5	50.5	74.18	0	83.627	5908300000	73	26	22	25	21	17	22	21	17	22	21	17	22
625	B2RUP0;Q8C5L7;Q8C545;Q571D9	B2RUP0;Q8C5L7;Q8C545	RNA-binding protein 34	Rbm34	tr|B2RUP0|B2RUP0_MOUSE RNA binding motif protein 34 OS=Mus musculus GN=Rbm34 PE=1 SV=1;sp|Q8C5L7|RBM34_MOUSE RNA-binding protein 34 OS=Mus musculus GN=Rbm34 PE=1 SV=1;tr|Q8C545|Q8C545_MOUSE Putative uncharacterized protein OS=Mus musculus PE=2 SV=1	356870000	371450000	294820000	39352000	13726000	14287000	11339000	356680000	425480000	414560000	13	13	13	39.8	39.8	39.8	49.116	0	22.903	1023100000	24	6	12	6	9	9	7	9	9	7	9	9	7
626	B2RUP8;Q3UMW8	B2RUP8;Q3UMW8	Ceroid-lipofuscinosis neuronal protein 5 homolog	Cln5	tr|B2RUP8|B2RUP8_MOUSE Ceroid-lipofuscinosis, neuronal 5 OS=Mus musculus GN=Cln5 PE=2 SV=1;sp|Q3UMW8|CLN5_MOUSE Ceroid-lipofuscinosis neuronal protein 5 homolog OS=Mus musculus GN=Cln5 PE=2 SV=1	270060000	188680000	212700000	24868000	10002000	6988200	7877800	251950000	267700000	214920000	8	8	8	24	24	24	39.329	0	9.4033	671450000	18	8	6	4	7	5	6	7	5	6	7	5	6
627	B2RUR0;O35601;O35601-2;Q8CAX4;Q3TA12;F6V072	B2RUR0;O35601;O35601-2;Q8CAX4	FYN-binding protein	Fyb	tr|B2RUR0|B2RUR0_MOUSE FYN binding protein OS=Mus musculus GN=Fyb PE=2 SV=1;sp|O35601|FYB_MOUSE FYN-binding protein OS=Mus musculus GN=Fyb PE=1 SV=2;sp|O35601-2|FYB_MOUSE Isoform FYB-120 of FYN-binding protein OS=Mus musculus GN=Fyb;tr|Q8CAX4|Q8CAX4_MOUSE	263320000	349330000	493180000	26329000	6269500	8317500	11742000	362550000	431160000	464810000	17	17	17	24.9	24.9	24.9	90.054	0	26.715	1105800000	31	8	8	15	8	7	14	8	7	14	8	7	14
628	B2RUR3;P06795;P21447	B2RUR3;P06795	Multidrug resistance protein 1B	Abcb1b	tr|B2RUR3|B2RUR3_MOUSE ATP-binding cassette, sub-family B (MDR/TAP), member 1B OS=Mus musculus GN=Abcb1b PE=2 SV=1;sp|P06795|MDR1B_MOUSE Multidrug resistance protein 1B OS=Mus musculus GN=Abcb1b PE=1 SV=1	7974200	8059000	56255000	1112100	122680	123980	865470	0	38800000	53883000	5	5	5	4.8	4.8	4.8	140.99	0	11.288	72289000	5	1	1	3	1	1	4	1	1	4	1	1	4
629	B2RUR8;D3Z210;D3YYZ8;H3BKW8;Q8R554	B2RUR8	OTU domain-containing protein 7B	Otud7b	sp|B2RUR8|OTU7B_MOUSE OTU domain-containing protein 7B OS=Mus musculus GN=Otud7b PE=1 SV=1	217530000	205190000	211510000	12436000	4265300	4023200	4147300	213050000	219410000	248570000	9	9	9	14.5	14.5	14.5	91.982	0	25.112	634230000	23	10	7	6	8	8	6	8	8	6	8	8	6
630	Q3TZ80;B2RV69;Q5SYH2;Q3U0H6	Q3TZ80;B2RV69;Q5SYH2;Q3U0H6	Transmembrane protein 199	Tmem199	tr|Q3TZ80|Q3TZ80_MOUSE Putative uncharacterized protein OS=Mus musculus GN=Tmem199 PE=2 SV=1;tr|B2RV69|B2RV69_MOUSE Expressed sequence AI316787 OS=Mus musculus GN=Tmem199 PE=2 SV=1;sp|Q5SYH2|TM199_MOUSE Transmembrane protein 199 OS=Mus musculus GN=Tmem199	224340000	237700000	197240000	59934000	20395000	21609000	17931000	262920000	208230000	246930000	6	6	6	36.1	36.1	36.1	23.129	0	16.42	659280000	17	5	6	6	5	5	4	5	5	4	5	5	4
631	B2RV71;Q9D1I2;Q80VN1	B2RV71;Q9D1I2	Bcl10-interacting CARD protein	1110007C09Rik	tr|B2RV71|B2RV71_MOUSE RIKEN cDNA 1110007C09, isoform CRA_a OS=Mus musculus GN=1110007C09Rik PE=2 SV=1;sp|Q9D1I2|BINCA_MOUSE Bcl10-interacting CARD protein OS=Mus musculus PE=2 SV=1	68491000	42474000	81435000	13743000	4892200	3033900	5816800	85355000	90559000	0	3	3	3	17.5	17.5	17.5	20.936	0	5.7043	192400000	3	1	1	1	1	1	2	1	1	2	1	1	2
632	Q3V1L7;B2RV73;Q8VHI3;Q3UHF9	Q3V1L7;B2RV73;Q8VHI3	GDP-fucose protein O-fucosyltransferase 2	Pofut2	tr|Q3V1L7|Q3V1L7_MOUSE Putative uncharacterized protein OS=Mus musculus GN=Pofut2 PE=2 SV=1;tr|B2RV73|B2RV73_MOUSE Protein O-fucosyltransferase 2 OS=Mus musculus GN=Pofut2 PE=2 SV=1;sp|Q8VHI3|OFUT2_MOUSE GDP-fucose protein O-fucosyltransferase 2 OS=Mus mus	972140000	992060000	1133200000	99916000	31359000	32002000	36555000	1106900000	1128100000	1109900000	14	14	14	36.8	36.8	36.8	49.387	0	27.33	3097400000	41	13	15	13	11	11	12	11	11	12	11	11	12
633	B2RVL6	B2RVL6	Zinc finger CCHC domain-containing protein 24	Zcchc24	sp|B2RVL6|ZCH24_MOUSE Zinc finger CCHC domain-containing protein 24 OS=Mus musculus GN=Zcchc24 PE=1 SV=1	121900000	108130000	0	19169000	10158000	9010900	0	121880000	0	0	3	3	3	14.9	14.9	14.9	26.96	0	4.911	230030000	4	2	2	0	2	2	0	2	2	0	2	2	0
634	B7ZWF8;B2RVM9	B7ZWF8;B2RVM9		1700067K01Rik	tr|B7ZWF8|B7ZWF8_MOUSE 1700067K01Rik protein OS=Mus musculus GN=1700067K01Rik PE=2 SV=1;tr|B2RVM9|B2RVM9_MOUSE 1700067K01Rik protein OS=Mus musculus GN=1700067K01Rik PE=2 SV=1	0	0	0	0	0	0	0	0	0	0	1	1	1	3.7	3.7	3.7	30.603	1	-2	0	0	0	0	0	0	1	0	0	1	0	0	1	0
635	B2RVP5;Q3THW5;P0C0S6;Q8R029;Q3TFU6;Q3UA95;G3UWL7	B2RVP5;Q3THW5;P0C0S6;Q8R029;Q3TFU6;Q3UA95	Histone H2A;Histone H2A.V;Histone H2A.Z	H2afv;H2afz	tr|B2RVP5|B2RVP5_MOUSE Histone H2A OS=Mus musculus GN=H2afv PE=2 SV=1;sp|Q3THW5|H2AV_MOUSE Histone H2A.V OS=Mus musculus GN=H2afv PE=1 SV=3;sp|P0C0S6|H2AZ_MOUSE Histone H2A.Z OS=Mus musculus GN=H2afz PE=1 SV=2;tr|Q8R029|Q8R029_MOUSE Histone H2A OS=Mus musc	12442000000	15778000000	16041000000	7376800000	2073700000	2629600000	2673500000	15504000000	19164000000	17789000000	5	3	3	53.9	41.4	41.4	13.509	0	7.8217	44261000000	60	20	17	23	5	5	5	3	3	3	3	3	3
636	B2RVQ1;Q9CQG6;Q9CQG6-2	B2RVQ1;Q9CQG6;Q9CQG6-2	Transmembrane protein 147	Tmem147	tr|B2RVQ1|B2RVQ1_MOUSE Transmembrane protein 147 OS=Mus musculus GN=Tmem147 PE=2 SV=1;sp|Q9CQG6|TM147_MOUSE Transmembrane protein 147 OS=Mus musculus GN=Tmem147 PE=2 SV=1;sp|Q9CQG6-2|TM147_MOUSE Isoform 2 of Transmembrane protein 147 OS=Mus musculus GN=Tme	71471000	54241000	84598000	16178000	5497700	4172400	6507600	143680000	68878000	112210000	2	2	2	8.5	8.5	8.5	25.335	0.00032749	2.9809	210310000	6	1	2	3	1	1	2	1	1	2	1	1	2
637	B2RVQ7;Q9D115	B2RVQ7;Q9D115	Zinc finger protein 706	Zfp706;Znf706	tr|B2RVQ7|B2RVQ7_MOUSE Zinc finger protein 706 OS=Mus musculus GN=Zfp706 PE=2 SV=1;sp|Q9D115|ZN706_MOUSE Zinc finger protein 706 OS=Mus musculus GN=Znf706 PE=2 SV=1	194210000	228710000	178470000	100230000	32369000	38119000	29746000	146660000	250510000	195890000	2	2	2	25	25	25	8.4977	0.00016938	3.5512	601400000	9	3	4	2	2	2	1	2	2	1	2	2	1
638	Q3U3W2;B2RVR2;Q3TM85;Q80TD8	Q3U3W2;B2RVR2;Q3TM85;Q80TD8		Tmem181a;Tmem181b-ps;mKIAA1423	tr|Q3U3W2|Q3U3W2_MOUSE Protein Tmem181a OS=Mus musculus GN=Tmem181a PE=2 SV=1;tr|B2RVR2|B2RVR2_MOUSE Predicted gene, 547127 OS=Mus musculus GN=547127 PE=2 SV=1;tr|Q3TM85|Q3TM85_MOUSE Putative uncharacterized protein (Fragment) OS=Mus musculus PE=2 SV=1;tr|	44372000	74249000	148990000	13381000	2218600	3712500	7449500	115480000	109320000	169300000	4	4	4	9.3	9.3	9.3	54.983	0.00016969	3.5841	267610000	12	3	3	6	2	2	4	2	2	4	2	2	4
639	B2RWB7;Q8BZA9	B2RWB7;Q8BZA9	Fructose-2,6-bisphosphatase TIGAR	9630033F20Rik;Tigar	tr|B2RWB7|B2RWB7_MOUSE 9630033F20Rik protein OS=Mus musculus GN=9630033F20Rik PE=2 SV=1;sp|Q8BZA9|TIGAR_MOUSE Fructose-2,6-bisphosphatase TIGAR OS=Mus musculus GN=Tigar PE=1 SV=1	109650000	35271000	100430000	16356000	7309800	2351400	6695300	97753000	75939000	82856000	3	3	3	21.9	21.9	21.9	29.19	0	17.229	245350000	5	2	0	3	2	1	3	2	1	3	2	1	3
640	F8WIX8;Q149V4;B2RWH3;Q64523;Q6GSS7	F8WIX8;Q149V4;B2RWH3;Q64523;Q6GSS7	Histone H2A;Histone H2A type 2-C;Histone H2A type 2-A	Hist1h2al;Hist2h2ac;Hist2h2aa1	tr|F8WIX8|F8WIX8_MOUSE Histone H2A OS=Mus musculus GN=Hist1h2al PE=3 SV=1;tr|Q149V4|Q149V4_MOUSE Histone H2A OS=Mus musculus GN=Hist2h2ac PE=2 SV=1;tr|B2RWH3|B2RWH3_MOUSE Histone H2A OS=Mus musculus GN=Hist2h2aa1 PE=2 SV=1;sp|Q64523|H2A2C_MOUSE Histone H2A	56259000	144230000	95599000	42299000	8036900	20605000	13657000	41686000	179300000	118060000	8	2	1	65.6	32	8.8	13.607	0	12.423	296090000	10	3	2	5	8	8	8	2	2	2	1	1	1
641	B2RWI2;Q9EP89;Q80UJ8;A1A4A8;Q3UEQ3;A0PJ65	B2RWI2;Q9EP89;Q80UJ8	Serine beta-lactamase-like protein LACTB, mitochondrial	Lactb	tr|B2RWI2|B2RWI2_MOUSE Lactamase, beta OS=Mus musculus GN=Lactb PE=2 SV=1;sp|Q9EP89|LACTB_MOUSE Serine beta-lactamase-like protein LACTB, mitochondrial OS=Mus musculus GN=Lactb PE=1 SV=1;tr|Q80UJ8|Q80UJ8_MOUSE Lactb protein OS=Mus musculus GN=Lactb PE=2 SV	641860000	495430000	316910000	44067000	19450000	15013000	9603200	694370000	662340000	422200000	9	9	9	23.8	23.8	23.8	60.705	0	21.951	1454200000	25	10	6	9	7	6	6	7	6	6	7	6	6
642	B2RWS6;Q8BJ14	B2RWS6	Histone acetyltransferase p300	Ep300	sp|B2RWS6|EP300_MOUSE Histone acetyltransferase p300 OS=Mus musculus GN=Ep300 PE=1 SV=2	9499100	28512000	4867200	516610	114450	343520	58641	0	13371000	29829000	13	3	3	6.7	1.7	1.7	263.3	0.00017097	3.7274	42879000	3	0	2	1	10	9	9	1	2	1	1	2	1
643	B2RWS7;Q8BZ47	B2RWS7;Q8BZ47	Zinc finger protein 609	Zfp609;Znf609	tr|B2RWS7|B2RWS7_MOUSE Zinc finger protein 609 OS=Mus musculus GN=Zfp609 PE=2 SV=1;sp|Q8BZ47|ZN609_MOUSE Zinc finger protein 609 OS=Mus musculus GN=Znf609 PE=1 SV=2	141330000	86887000	77626000	4778800	2208200	1357600	1212900	125250000	124740000	143100000	8	8	8	10.7	10.7	10.7	145.89	0	23.195	305840000	11	4	4	3	5	4	4	5	4	4	5	4	4
644	B2RWT9;Q8CJH3	B2RWT9;Q8CJH3	Plexin-B1	Plxnb1	tr|B2RWT9|B2RWT9_MOUSE Plexin B1 OS=Mus musculus GN=Plxnb1 PE=2 SV=1;sp|Q8CJH3|PLXB1_MOUSE Plexin-B1 OS=Mus musculus GN=Plxnb1 PE=1 SV=2	109140000	108380000	101140000	3319400	1136900	1129000	1053600	134220000	134970000	120470000	9	9	9	8.1	8.1	8.1	231.44	0	13.35	318660000	14	3	5	6	4	5	5	4	5	5	4	5	5
645	E9Q6G4;B2RWU5;Q91V24;B7ZNA4;Q8BPY1	E9Q6G4;B2RWU5;Q91V24;B7ZNA4	ATP-binding cassette sub-family A member 7	Abca7	tr|E9Q6G4|E9Q6G4_MOUSE ATP-binding cassette sub-family A member 7 OS=Mus musculus GN=Abca7 PE=1 SV=1;tr|B2RWU5|B2RWU5_MOUSE Abca7 protein OS=Mus musculus GN=Abca7 PE=2 SV=1;sp|Q91V24|ABCA7_MOUSE ATP-binding cassette sub-family A member 7 OS=Mus musculus GN	11660000	0	146780000	1523400	112110	0	1411300	85296000	0	97891000	3	3	2	2.3	2.3	1.9	237.75	0.0024115	1.8628	158440000	4	1	0	3	1	0	3	1	0	3	1	0	2
646	B2RWW1;Q8C052	B2RWW1;Q8C052	Microtubule-associated protein 1S;MAP1S heavy chain;MAP1S light chain	Map1s	tr|B2RWW1|B2RWW1_MOUSE Microtubule-associated protein 1S OS=Mus musculus GN=Map1s PE=2 SV=1;sp|Q8C052|MAP1S_MOUSE Microtubule-associated protein 1S OS=Mus musculus GN=Map1s PE=1 SV=2	1379700000	1294000000	1459900000	98420000	32851000	30810000	34759000	1592300000	1949100000	1454800000	20	20	20	30.9	30.9	30.9	103.02	0	52.881	4133600000	60	20	21	19	13	14	13	13	14	13	13	14	13
647	B7ZCJ0;B2RWX1;B7ZCJ1;Q6DFV3;G3UWM5;G3UX38;A2BHQ2	B7ZCJ0;B2RWX1;B7ZCJ1;Q6DFV3;G3UWM5	Rho GTPase-activating protein 21	Arhgap21	tr|B7ZCJ0|B7ZCJ0_MOUSE Rho GTPase-activating protein 21 OS=Mus musculus GN=Arhgap21 PE=1 SV=1;tr|B2RWX1|B2RWX1_MOUSE Arhgap21 protein OS=Mus musculus GN=Arhgap21 PE=2 SV=1;tr|B7ZCJ1|B7ZCJ1_MOUSE Rho GTPase-activating protein 21 OS=Mus musculus GN=Arhgap21	55217000	77663000	16772000	1216700	448920	631410	136360	67710000	79965000	21039000	7	7	7	6.7	6.7	6.7	215.86	0	9.363	149650000	10	4	5	1	4	5	1	4	5	1	4	5	1
648	E9QPY6;B2RWY6;Q8C9T6;Q62156;P13705	E9QPY6;B2RWY6;Q8C9T6;Q62156;P13705	DNA mismatch repair protein Msh3	Msh3;Rep-3	tr|E9QPY6|E9QPY6_MOUSE DNA mismatch repair protein Msh3 OS=Mus musculus GN=Msh3 PE=3 SV=1;tr|B2RWY6|B2RWY6_MOUSE MutS homolog 3 (E. coli) OS=Mus musculus GN=Msh3 PE=2 SV=1;tr|Q8C9T6|Q8C9T6_MOUSE Putative uncharacterized protein OS=Mus musculus PE=2 SV=1;tr	29126000	29837000	0	842320	416080	426240	0	30365000	36982000	0	2	2	2	2.8	2.8	2.8	123.4	0.00016892	3.4934	58962000	4	2	1	1	2	1	1	2	1	1	2	1	1
649	B2RX00;Q9ESK9;Q8CHH8;F7CC56;E9PX56;Q6NZG0;E0CZG6;E0CYY6;F6TLJ4;F7CCJ3	B2RX00;Q9ESK9;Q8CHH8;F7CC56;E9PX56;Q6NZG0	RB1-inducible coiled-coil protein 1	Rb1cc1	tr|B2RX00|B2RX00_MOUSE RB1-inducible coiled-coil 1 OS=Mus musculus GN=Rb1cc1 PE=2 SV=1;sp|Q9ESK9|RBCC1_MOUSE RB1-inducible coiled-coil protein 1 OS=Mus musculus GN=Rb1cc1 PE=1 SV=3;tr|Q8CHH8|Q8CHH8_MOUSE MKIAA0203 protein (Fragment) OS=Mus musculus GN=Rb1c	243030000	187620000	251260000	6556900	2336900	1804100	2416000	235470000	253610000	253950000	7	7	7	6.5	6.5	6.5	182.36	0	6.3442	681920000	9	3	2	4	3	3	4	3	3	4	3	3	4
650	G3X9Z4;B2RX07;Q69ZY3;F6UFZ5;Q8R2P5;A5HLW1;A5HLW0;Q8K0S1;Q6PCW0;Q3TT32;Q3TTQ0	G3X9Z4;B2RX07;Q69ZY3;F6UFZ5;Q8R2P5;A5HLW1;A5HLW0		Pcf11	tr|G3X9Z4|G3X9Z4_MOUSE Cleavage and polyadenylation factor subunit homolog (S. cerevisiae) OS=Mus musculus GN=Pcf11 PE=4 SV=1;tr|B2RX07|B2RX07_MOUSE Cleavage and polyadenylation factor subunit homolog (S. cerevisiae) OS=Mus musculus GN=Pcf11 PE=2 SV=1;tr|Q	76701000	12490000	71698000	1658600	790730	128760	739160	0	29729000	75124000	6	6	3	6.5	6.5	3.7	172.72	0	9.3198	160890000	7	2	1	4	3	1	4	3	1	4	0	0	3
651	B2RX11;Q0KK55;D3Z3X0;F6SPU5;D3Z5B8;Q0KK55-2;Q0KK55-3	B2RX11;Q0KK55;D3Z3X0;F6SPU5;D3Z5B8;Q0KK55-2;Q0KK55-3	Protein very KIND	Kndc1	tr|B2RX11|B2RX11_MOUSE Kinase non-catalytic C-lobe domain (KIND) containing 1 OS=Mus musculus GN=Kndc1 PE=2 SV=1;sp|Q0KK55|VKIND_MOUSE Protein very KIND OS=Mus musculus GN=Kndc1 PE=1 SV=2;tr|D3Z3X0|D3Z3X0_MOUSE Protein very KIND OS=Mus musculus GN=Kndc1 PE	0	166770000	25940000	2050100	0	1774100	275950	0	119270000	123590000	2	2	2	0.8	0.8	0.8	191.39	0.003414	1.6069	192710000	3	0	2	1	0	2	1	0	2	1	0	2	1
652	B2RX13;Q3UQ28;Q80U60;D3Z5M7	B2RX13;Q3UQ28;Q80U60	Peroxidasin homolog	Pxdn	tr|B2RX13|B2RX13_MOUSE Peroxidasin homolog (Drosophila) OS=Mus musculus GN=Pxdn PE=2 SV=1;sp|Q3UQ28|PXDN_MOUSE Peroxidasin homolog OS=Mus musculus GN=Pxdn PE=2 SV=2;tr|Q80U60|Q80U60_MOUSE MKIAA0230 protein (Fragment) OS=Mus musculus GN=Pxdn PE=2 SV=1	355520000	297150000	425420000	12392000	4086400	3415500	4889900	462990000	481820000	436320000	17	17	17	15.9	15.9	15.9	165.12	0	34.357	1078100000	29	7	14	8	7	12	11	7	12	11	7	12	11
653	B2RX15;Q6ZPS6	B2RX15;Q6ZPS6	Ankyrin repeat and IBR domain-containing protein 1	Ankib1	tr|B2RX15|B2RX15_MOUSE Ankib1 protein OS=Mus musculus GN=Ankib1 PE=2 SV=1;sp|Q6ZPS6|AKIB1_MOUSE Ankyrin repeat and IBR domain-containing protein 1 OS=Mus musculus GN=Ankib1 PE=1 SV=2	0	0	22126000	362720	0	0	362720	0	0	32442000	2	2	2	2.5	2.5	2.5	122.61	0.0012349	2.2561	22126000	2	0	0	2	0	0	2	0	0	2	0	0	2
654	D3YUM6;D3Z1C4;B2RX33;Q8BWB6	D3YUM6;D3Z1C4;B2RX33;Q8BWB6	Metalloreductase STEAP2	Steap2	tr|D3YUM6|D3YUM6_MOUSE MCG2960, isoform CRA_a OS=Mus musculus GN=Steap2 PE=4 SV=1;tr|D3Z1C4|D3Z1C4_MOUSE Metalloreductase STEAP2 (Fragment) OS=Mus musculus GN=Steap2 PE=4 SV=1;tr|B2RX33|B2RX33_MOUSE MCG2960, isoform CRA_b OS=Mus musculus GN=Steap2 PE=2 SV=	153340000	0	64633000	8719000	6133700	0	2585300	0	0	82674000	4	4	4	15.2	15.2	15.2	45.805	0.0003269	2.96	217980000	3	2	0	1	2	0	3	2	0	3	2	0	3
655	B2RX66;Q5F2E8;Q3UUG1	B2RX66;Q5F2E8	Serine/threonine-protein kinase TAO1	Taok1	tr|B2RX66|B2RX66_MOUSE MCG124812 OS=Mus musculus GN=Taok1 PE=2 SV=1;sp|Q5F2E8|TAOK1_MOUSE Serine/threonine-protein kinase TAO1 OS=Mus musculus GN=Taok1 PE=1 SV=1	516310000	751330000	884560000	37758000	9058000	13181000	15519000	714020000	899550000	776580000	15	15	13	17.4	17.4	15.2	116.05	0	21.814	2152200000	32	11	10	11	10	11	10	10	11	10	8	10	8
656	Q3UFN2;B2RX76;Q9CYK2-2;Q9CYK2	Q3UFN2;B2RX76;Q9CYK2-2;Q9CYK2	Glutaminyl-peptide cyclotransferase	Qpct	tr|Q3UFN2|Q3UFN2_MOUSE Putative uncharacterized protein OS=Mus musculus GN=Qpct PE=2 SV=1;tr|B2RX76|B2RX76_MOUSE Glutaminyl-peptide cyclotransferase (Glutaminyl cyclase) OS=Mus musculus GN=Qpct PE=2 SV=1;sp|Q9CYK2-2|QPCT_MOUSE Isoform 2 of Glutaminyl-pepti	31489000	5764900	20723000	3220900	1749400	320270	1151300	39926000	15619000	0	3	3	3	9.4	9.4	9.4	41.094	0.0001705	3.6969	57976000	4	2	1	1	2	1	1	2	1	1	2	1	1
657	B2RX77;Q9D483	B2RX77;Q9D483	DNA-directed RNA polymerase III subunit RPC3	Polr3c	tr|B2RX77|B2RX77_MOUSE MCG14870 OS=Mus musculus GN=Polr3c PE=2 SV=1;sp|Q9D483|RPC3_MOUSE DNA-directed RNA polymerase III subunit RPC3 OS=Mus musculus GN=Polr3c PE=2 SV=1	47492000	92451000	82220000	6171200	1319200	2568100	2283900	85150000	88987000	65209000	3	3	3	7.3	7.3	7.3	60.705	0	5.1726	222160000	6	1	2	3	2	3	1	2	3	1	2	3	1
658	B2RXC1;B2RXC1-2;REV__E9Q099	B2RXC1	Trafficking protein particle complex subunit 11	Trappc11	sp|B2RXC1|TPC11_MOUSE Trafficking protein particle complex subunit 11 OS=Mus musculus GN=Trappc11 PE=2 SV=1	648080000	603230000	727950000	30926000	10126000	9425500	11374000	781560000	819740000	834740000	17	17	17	21.2	21.2	21.2	128.39	0	39.124	1979300000	42	16	10	16	14	11	13	14	11	13	14	11	13
659	B2RXC6;Q7TSI4	B2RXC6	DNA-directed RNA polymerase	Polr3a	tr|B2RXC6|B2RXC6_MOUSE DNA-directed RNA polymerase OS=Mus musculus GN=Polr3a PE=2 SV=1	397960000	330340000	419160000	11953000	4145400	3441000	4366200	482080000	501330000	354720000	15	13	13	14.2	13.1	13.1	155.74	0	22.019	1147500000	31	9	10	12	9	11	11	9	9	10	9	9	10
660	B2RXC8;Q8BVE6;Q8BXX8	B2RXC8;Q8BVE6;Q8BXX8		Ppp2r3a	tr|B2RXC8|B2RXC8_MOUSE 3222402P14Rik protein OS=Mus musculus GN=Ppp2r3a PE=2 SV=1;tr|Q8BVE6|Q8BVE6_MOUSE Putative uncharacterized protein OS=Mus musculus GN=Ppp2r3a PE=2 SV=1;tr|Q8BXX8|Q8BXX8_MOUSE Putative uncharacterized protein (Fragment) OS=Mus musculu	35265000	14368000	0	775520	551020	224500	0	0	18978000	0	2	2	2	2.3	2.3	2.3	130.26	0.0024158	1.9054	49633000	2	1	1	0	1	1	0	1	1	0	1	1	0
661	B7ZWI2;B2RXM7;Q9D1J3	B7ZWI2;B2RXM7;Q9D1J3	SAP domain-containing ribonucleoprotein	1110005A23Rik;Sarnp	tr|B7ZWI2|B7ZWI2_MOUSE 1110005A23Rik protein OS=Mus musculus GN=1110005A23Rik PE=2 SV=1;tr|B2RXM7|B2RXM7_MOUSE MCG113697 OS=Mus musculus GN=1110005A23Rik PE=2 SV=1;sp|Q9D1J3|SARNP_MOUSE SAP domain-containing ribonucleoprotein OS=Mus musculus GN=Sarnp PE=1	6793100000	7076500000	7867300000	1449100000	452870000	471760000	524490000	7695000000	8270800000	8120800000	8	8	8	39.2	39.2	39.2	23.461	0	62.816	21737000000	53	17	17	19	7	8	7	7	8	7	7	8	7
662	B2RXP1;Q8BVU0;E9QAU9;B7ZWM8;E9Q892;F6YZL6;F6Y466;F6TPH7;E9Q0H5;F6VQ19;Q3UMG5-2;Q3UMG5-3;Q3UMG5	B2RXP1;Q8BVU0;E9QAU9;B7ZWM8;E9Q892	Leucine-rich repeat and calponin homology domain-containing protein 3	Lrch3	tr|B2RXP1|B2RXP1_MOUSE Leucine-rich repeat and calponin homology domain-containing protein 3 OS=Mus musculus GN=Lrch3 PE=2 SV=1;sp|Q8BVU0|LRCH3_MOUSE Leucine-rich repeat and calponin homology domain-containing protein 3 OS=Mus musculus GN=Lrch3 PE=2 SV=3;t	893690000	1065100000	985380000	75492000	22915000	27311000	25266000	1138600000	1287500000	1168300000	19	19	19	35.8	35.8	35.8	82.277	0	71.981	2944200000	56	18	17	21	15	15	14	15	15	14	15	15	14
663	E9Q3A7;B2RXP4;Q3UFN0	E9Q3A7;B2RXP4;Q3UFN0		Cdh19	tr|E9Q3A7|E9Q3A7_MOUSE Protein Cdh19 OS=Mus musculus GN=Cdh19 PE=4 SV=1;tr|B2RXP4|B2RXP4_MOUSE Cadherin 19, type 2 OS=Mus musculus GN=Cdh19 PE=2 SV=1;tr|Q3UFN0|Q3UFN0_MOUSE Putative uncharacterized protein (Fragment) OS=Mus musculus GN=Cdh19 PE=2 SV=1	292590000	278170000	302840000	22990000	7699700	7320400	7969500	403570000	392840000	330630000	7	7	7	11.4	11.4	11.4	87.259	0	13.247	873600000	19	6	5	8	4	5	7	4	5	7	4	5	7
664	B2RXW8;B2RXQ2;B8QI33;B8QI34;Q5DTM9;Q8BSS9;Q3UJC0;S4R1I7;B8QI36;B8QI35;C7G3P1;P60469	B2RXW8;B2RXQ2;B8QI33		Ppfia1	tr|B2RXW8|B2RXW8_MOUSE Ppfia1 protein OS=Mus musculus GN=Ppfia1 PE=1 SV=1;tr|B2RXQ2|B2RXQ2_MOUSE Ppfia1 protein OS=Mus musculus GN=Ppfia1 PE=1 SV=1;tr|B8QI33|B8QI33_MOUSE Liprin-alpha 1 OS=Mus musculus GN=Ppfia1 PE=2 SV=1	1392900000	1600400000	1275700000	55442000	18089000	20785000	16568000	1617500000	1512100000	1771900000	28	28	16	29.3	29.3	15.3	140.13	0	91.198	4269000000	79	28	25	26	21	19	20	21	19	20	10	12	11
665	B7ZWK5;E9Q839;B2RXQ3;Q6P9P0;Q3TST9;Q3UH46;Q8BZ50	B7ZWK5;E9Q839;B2RXQ3;Q6P9P0;Q3TST9;Q3UH46	Protein FAM178A	Fam178a	tr|B7ZWK5|B7ZWK5_MOUSE Fam178a protein OS=Mus musculus GN=Fam178a PE=2 SV=1;tr|E9Q839|E9Q839_MOUSE Protein FAM178A OS=Mus musculus GN=Fam178a PE=4 SV=1;tr|B2RXQ3|B2RXQ3_MOUSE Family with sequence similarity 178, member A OS=Mus musculus GN=Fam178a PE=2 SV=	48813000	129680000	60316000	3674000	750960	1995100	927940	88658000	88878000	91773000	5	5	5	5.3	5.3	5.3	127.9	0.00032971	3.0829	238810000	10	3	3	4	2	3	3	2	3	3	2	3	3
666	B2RXQ4;B7ZWK0;Q69Z74;B2RXX0;P51954;Q8CD72;Q8BSB6;Q3UXI0	B2RXQ4;B7ZWK0;Q69Z74;B2RXX0;P51954;Q8CD72	Serine/threonine-protein kinase Nek1	Nek1	tr|B2RXQ4|B2RXQ4_MOUSE Nek1 protein OS=Mus musculus GN=Nek1 PE=2 SV=1;tr|B7ZWK0|B7ZWK0_MOUSE Nek1 protein OS=Mus musculus GN=Nek1 PE=1 SV=1;tr|Q69Z74|Q69Z74_MOUSE MKIAA1901 protein (Fragment) OS=Mus musculus GN=Nek1 PE=2 SV=1;tr|B2RXX0|B2RXX0_MOUSE Nek1 pr	0	66108000	7989200	1073900	0	958090	115780	0	73037000	30965000	3	3	3	3.7	3.7	3.7	133.85	0	4.7018	74097000	4	0	3	1	0	3	1	0	3	1	0	3	1
667	B2RXQ8;Q8BFQ4	B2RXQ8;Q8BFQ4	WD repeat-containing protein 82	Wdr82	tr|B2RXQ8|B2RXQ8_MOUSE MCG19514, isoform CRA_a OS=Mus musculus GN=Wdr82 PE=2 SV=1;sp|Q8BFQ4|WDR82_MOUSE WD repeat-containing protein 82 OS=Mus musculus GN=Wdr82 PE=1 SV=1	1450500000	1896100000	1812300000	257950000	72524000	94805000	90617000	1788300000	2260300000	2175400000	17	17	17	55.3	55.3	55.3	35.079	0	55.438	5158900000	65	16	28	21	15	14	15	15	14	15	15	14	15
668	B2RXR2;Q8VD65;B2RY05	B2RXR2;Q8VD65;B2RY05	Phosphoinositide 3-kinase regulatory subunit 4	Pik3r4	tr|B2RXR2|B2RXR2_MOUSE Phosphatidylinositol 3 kinase, regulatory subunit, polypeptide 4, p150 OS=Mus musculus GN=Pik3r4 PE=2 SV=1;sp|Q8VD65|PI3R4_MOUSE Phosphoinositide 3-kinase regulatory subunit 4 OS=Mus musculus GN=Pik3r4 PE=1 SV=3;tr|B2RY05|B2RY05_MOUS	1078400000	852500000	1042900000	40737000	14772000	11678000	14286000	1117500000	1368000000	1236000000	24	24	24	24.8	24.8	24.8	152.57	0	60.138	2973800000	65	20	23	22	18	17	16	18	17	16	18	17	16
669	B9EKQ6;B2RXR4;Q3UPC7	B9EKQ6;B2RXR4;Q3UPC7	Uncharacterized protein KIAA0825 homolog	2210408I21Rik	tr|B9EKQ6|B9EKQ6_MOUSE 2210408I21Rik protein OS=Mus musculus GN=2210408I21Rik PE=2 SV=1;tr|B2RXR4|B2RXR4_MOUSE 2210408I21Rik protein OS=Mus musculus GN=2210408I21Rik PE=2 SV=1;sp|Q3UPC7|K0825_MOUSE Uncharacterized protein KIAA0825 homolog OS=Mus musculus P	0	156820000	0	2178000	0	2178000	0	0	213200000	0	2	2	2	1.8	1.8	1.8	145.53	1	-2	156820000	1	0	1	0	0	1	1	0	1	1	0	1	1
670	Q8BX16;Q8C0H1;Q501L8;Q8BKW5;B2RXS3;Q69ZJ3;F8VQ70;Q8BIZ8	Q8BX16;Q8C0H1;Q501L8;Q8BKW5;B2RXS3;Q69ZJ3;F8VQ70;Q8BIZ8		Scaper	tr|Q8BX16|Q8BX16_MOUSE Putative uncharacterized protein (Fragment) OS=Mus musculus GN=Scaper PE=2 SV=2;tr|Q8C0H1|Q8C0H1_MOUSE Putative uncharacterized protein (Fragment) OS=Mus musculus GN=Scaper PE=2 SV=1;tr|Q501L8|Q501L8_MOUSE Scaper protein (Fragment) O	48081000	0	8016900	1809600	1551000	0	258610	31013000	0	30876000	2	2	2	5.2	5.2	5.2	59.292	0.00047348	2.5241	56098000	2	2	0	0	2	0	1	2	0	1	2	0	1
671	B2RXS4;Q8CHG6;Q99LF0;Q8K2J5;REV__A2AKG8-3;REV__Q80T90;REV__E9PYJ6;REV__A2AKG8;Q9QZC2	B2RXS4;Q8CHG6	Plexin-B2	Plxnb2;mKIAA0315	sp|B2RXS4|PLXB2_MOUSE Plexin-B2 OS=Mus musculus GN=Plxnb2 PE=1 SV=1;tr|Q8CHG6|Q8CHG6_MOUSE MKIAA0315 protein (Fragment) OS=Mus musculus GN=mKIAA0315 PE=4 SV=2	2349100000	1782700000	2149900000	62818000	23491000	17827000	21499000	2656900000	2244900000	2481200000	39	39	38	29.1	29.1	28.7	206.23	0	121.53	6281800000	114	39	34	41	29	26	30	29	26	30	28	25	29
672	B2RY08;E9QMR2;B2RY79;B2RXS7;F8VPN7;Q8BIK4;Q8BIK4-2;Q7TN11;Q6PF84;Q8BIK4-3;Q3UYH1	B2RY08;E9QMR2;B2RY79;B2RXS7;F8VPN7;Q8BIK4;Q8BIK4-2;Q7TN11	Dedicator of cytokinesis protein 9	Dock9	tr|B2RY08|B2RY08_MOUSE Dock9 protein OS=Mus musculus GN=Dock9 PE=2 SV=1;tr|E9QMR2|E9QMR2_MOUSE Dedicator of cytokinesis protein 9 OS=Mus musculus GN=Dock9 PE=4 SV=1;tr|B2RY79|B2RY79_MOUSE Dock9 protein OS=Mus musculus GN=Dock9 PE=2 SV=1;tr|B2RXS7|B2RXS7_MO	92879000	211760000	207900000	4343600	787110	1794600	1761800	148790000	275980000	225070000	13	13	13	10.3	10.3	10.3	233.74	0	13.348	512540000	22	3	8	11	4	8	10	4	8	10	4	8	10
673	B2RXT3;E9Q7L0	B2RXT3;E9Q7L0		Ogdhl	tr|B2RXT3|B2RXT3_MOUSE Ogdhl protein OS=Mus musculus GN=Ogdhl PE=2 SV=1;tr|E9Q7L0|E9Q7L0_MOUSE Protein Ogdhl OS=Mus musculus GN=Ogdhl PE=4 SV=1	3461400000	2825900000	4190100000	201490000	66565000	54345000	80580000	3786900000	3903000000	4248500000	30	23	23	42.7	35.1	35.1	114.56	0	102.87	10477000000	98	35	30	33	27	24	26	21	17	20	21	17	20
674	B2RXT8;F8VPQ2;B2RY61;Q05CI2;Q6PE90;Q8BY40;Q8CIT8;Q8CIT7;Q8BYA2;Q8BWM4;E9Q9V1	B2RXT8;F8VPQ2;B2RY61;Q05CI2;Q6PE90;Q8BY40		Arid4a	tr|B2RXT8|B2RXT8_MOUSE Arid4a protein OS=Mus musculus GN=Arid4a PE=2 SV=1;tr|F8VPQ2|F8VPQ2_MOUSE Protein Arid4a OS=Mus musculus GN=Arid4a PE=4 SV=1;tr|B2RY61|B2RY61_MOUSE AT rich interactive domain 4A (RBP1-like) OS=Mus musculus GN=Arid4a PE=2 SV=1;tr|Q05C	0	67492000	249530000	4284100	0	912050	3372100	0	202510000	183440000	7	7	7	6.5	6.5	6.5	141.87	0	5.8595	317030000	8	0	3	5	0	4	6	0	4	6	0	4	6
675	B2RXU3;Q8BH07	B2RXU3;Q8BH07	ADP-ribosylation factor-like protein 6-interacting protein 6	Arl6ip6	tr|B2RXU3|B2RXU3_MOUSE ADP-ribosylation factor-like 6 interacting protein 6 OS=Mus musculus GN=Arl6ip6 PE=2 SV=1;sp|Q8BH07|AR6P6_MOUSE ADP-ribosylation factor-like protein 6-interacting protein 6 OS=Mus musculus GN=Arl6ip6 PE=1 SV=1	0	23922000	89754000	10334000	0	2174800	8159500	0	0	107700000	2	2	2	19.5	19.5	19.5	24.894	0.00017042	3.69	113680000	3	0	1	2	0	1	1	0	1	1	0	1	1
676	B2RXV4	B2RXV4	Feline leukemia virus subgroup C receptor-related protein 1	Flvcr1	sp|B2RXV4|FLVC1_MOUSE Feline leukemia virus subgroup C receptor-related protein 1 OS=Mus musculus GN=Flvcr1 PE=2 SV=1	20283000	53785000	0	4937800	1352200	3585600	0	43173000	46678000	0	1	1	1	3.2	3.2	3.2	60.468	0.00032841	3.0288	74067000	2	1	1	0	1	1	0	1	1	0	1	1	0
677	B2RXW4;Q9R1A8	B2RXW4;Q9R1A8	E3 ubiquitin-protein ligase RFWD2	Rfwd2	tr|B2RXW4|B2RXW4_MOUSE Ring finger and WD repeat domain 2 OS=Mus musculus GN=Rfwd2 PE=2 SV=1;sp|Q9R1A8|RFWD2_MOUSE E3 ubiquitin-protein ligase RFWD2 OS=Mus musculus GN=Rfwd2 PE=1 SV=2	18632000	14188000	18082000	1375700	503560	383470	488690	18501000	20786000	14775000	1	1	1	2.3	2.3	2.3	80.47	0	5.421	50902000	3	1	1	1	1	1	1	1	1	1	1	1	1
678	E0CZF8;E0CXD6;B2RXX2;B9EKN8;B2RY17;P83510;E0CZD7;E0CY98;E9PUL9;B2RQ80;P83510-2;E0CYV5	E0CZF8;E0CXD6;B2RXX2;B9EKN8;B2RY17;P83510;E0CZD7;E0CY98;E9PUL9;B2RQ80;P83510-2	Traf2 and NCK-interacting protein kinase	Tnik	tr|E0CZF8|E0CZF8_MOUSE Traf2 and NCK-interacting protein kinase OS=Mus musculus GN=Tnik PE=4 SV=1;tr|E0CXD6|E0CXD6_MOUSE Traf2 and NCK-interacting protein kinase OS=Mus musculus GN=Tnik PE=4 SV=1;tr|B2RXX2|B2RXX2_MOUSE Tnik protein OS=Mus musculus GN=Tnik	263110000	313250000	288610000	13307000	4047900	4819300	4440100	374120000	394430000	395840000	10	10	8	11.2	11.2	9.5	144.25	0	18.804	864970000	23	6	9	8	6	6	7	6	6	7	5	4	5
679	H7BX44;D3YYN8;E9PVY0;B2RXX8;Q3UU96-2;Q3UU96;F6YZJ7;F6S5Z6;F6Q5A5;F6W0C2	H7BX44;D3YYN8;E9PVY0;B2RXX8;Q3UU96-2;Q3UU96;F6YZJ7;F6S5Z6;F6Q5A5	Non-specific serine/threonine protein kinase;Serine/threonine-protein kinase MRCK alpha	Cdc42bpa	tr|H7BX44|H7BX44_MOUSE Serine/threonine-protein kinase MRCK alpha OS=Mus musculus GN=Cdc42bpa PE=4 SV=1;tr|D3YYN8|D3YYN8_MOUSE Serine/threonine-protein kinase MRCK alpha OS=Mus musculus GN=Cdc42bpa PE=4 SV=1;tr|E9PVY0|E9PVY0_MOUSE Serine/threonine-protein	71692000	57774000	15880000	1690100	833630	671790	184660	137680000	46034000	0	10	8	8	7	5.9	5.9	185.78	0	7.7277	145350000	7	4	1	2	5	4	4	4	2	3	4	2	3
680	Q6PB57;B7ZWM7;E9Q4F7;B2RY01;E9Q4F8	Q6PB57;B7ZWM7;E9Q4F7;B2RY01;E9Q4F8		Ankrd11	tr|Q6PB57|Q6PB57_MOUSE Ankrd11 protein (Fragment) OS=Mus musculus GN=Ankrd11 PE=2 SV=1;tr|B7ZWM7|B7ZWM7_MOUSE Ankrd11 protein OS=Mus musculus GN=Ankrd11 PE=2 SV=1;tr|E9Q4F7|E9Q4F7_MOUSE Protein Ankrd11 OS=Mus musculus GN=Ankrd11 PE=4 SV=1;tr|B2RY01|B2RY01_	0	10154000	16713000	1074700	0	406170	668510	0	17662000	14232000	2	2	2	4.2	4.2	4.2	82.257	0	5.0836	26867000	3	0	1	2	0	1	2	0	1	2	0	1	2
681	B2RY04;Q8BK93;Q91YL4	B2RY04	Dedicator of cytokinesis protein 5	Dock5	sp|B2RY04|DOCK5_MOUSE Dedicator of cytokinesis protein 5 OS=Mus musculus GN=Dock5 PE=1 SV=2	2950300000	2751400000	2463200000	70387000	25433000	23719000	21235000	3365600000	3609700000	3182100000	53	53	51	36.1	36.1	34.9	214.43	0	203.82	8164900000	166	58	52	56	42	37	36	42	37	36	40	35	34
682	B2RY56;S4R2B0;Q8BU35;S4R2A4;S4R2J1;S4R1X9;S4R2F7	B2RY56;S4R2B0;Q8BU35	RNA-binding protein 25	Rbm25	sp|B2RY56|RBM25_MOUSE RNA-binding protein 25 OS=Mus musculus GN=Rbm25 PE=1 SV=2;tr|S4R2B0|S4R2B0_MOUSE RNA-binding protein 25 (Fragment) OS=Mus musculus GN=Rbm25 PE=1 SV=1;tr|Q8BU35|Q8BU35_MOUSE Putative uncharacterized protein OS=Mus musculus GN=Rbm25 PE=	3349700000	2625000000	5680000000	323740000	93046000	72916000	157780000	4268800000	4830200000	5019800000	20	20	20	30.9	30.9	30.9	99.551	0	88.014	11655000000	84	31	25	28	19	16	16	19	16	16	19	16	16
683	H3BK72;B7ZWP0;H3BJZ3;B2RY59;Q5NCX5-2;Q5NCX5;Q80YV0	H3BK72;B7ZWP0;H3BJZ3;B2RY59;Q5NCX5-2;Q5NCX5;Q80YV0	Neuralized-like protein 4	Neurl4	tr|H3BK72|H3BK72_MOUSE Neuralized-like protein 4 OS=Mus musculus GN=Neurl4 PE=4 SV=1;tr|B7ZWP0|B7ZWP0_MOUSE Neurl4 protein OS=Mus musculus GN=Neurl4 PE=2 SV=1;tr|H3BJZ3|H3BJZ3_MOUSE Neuralized-like protein 4 OS=Mus musculus GN=Neurl4 PE=4 SV=1;tr|B2RY59|B2	0	22388000	27244000	709030	0	319840	389200	0	41572000	31210000	2	2	2	1.7	1.7	1.7	165.05	0.006271	1.3714	49632000	5	0	2	3	0	1	2	0	1	2	0	1	2
684	E9Q3T3;B2RY84;L0N7N1;Q7TQJ9;O35064	E9Q3T3;B2RY84;L0N7N1;Q7TQJ9	Kinesin-like protein;Kinesin-like protein KIF14	Kif14	tr|E9Q3T3|E9Q3T3_MOUSE Protein Kif14 OS=Mus musculus GN=Kif14 PE=3 SV=1;tr|B2RY84|B2RY84_MOUSE Kif14 protein OS=Mus musculus GN=Kif14 PE=2 SV=1;tr|L0N7N1|L0N7N1_MOUSE Kinesin family member 14 OS=Mus musculus GN=Kif14 PE=1 SV=1;tr|Q7TQJ9|Q7TQJ9_MOUSE Kif14	81293000	78038000	82792000	2241900	752710	722580	766590	91450000	89114000	80275000	8	8	8	6.5	6.5	6.5	180.95	0	12.262	242120000	11	3	4	4	4	5	5	4	5	5	4	5	5
685	G3UVU9;B2WTI1;B2WTI2;Q9ERI5-2;Q9ERI5;F6VRF7;F6VMC4;A4FUU3;F7BDP4	G3UVU9;B2WTI1;B2WTI2;Q9ERI5-2;Q9ERI5;F6VRF7;F6VMC4;A4FUU3	Bifunctional arginine demethylase and lysyl-hydroxylase JMJD6	Jmjd6	tr|G3UVU9|G3UVU9_MOUSE Bifunctional arginine demethylase and lysyl-hydroxylase JMJD6 OS=Mus musculus GN=Jmjd6 PE=4 SV=1;tr|B2WTI1|B2WTI1_MOUSE Phosphatidylserine receptor transcript variant 1 OS=Mus musculus GN=Jmjd6 PE=2 SV=1;tr|B2WTI2|B2WTI2_MOUSE Phosph	331220000	392570000	434810000	72413000	20701000	24536000	27176000	358670000	542150000	425530000	8	8	8	45.6	45.6	45.6	32.003	0	24.76	1158600000	27	9	10	8	7	6	5	7	6	5	7	6	5
686	Q80UU5;B2X2E1;Q7TMI8;Q6PF88;F6QX82;Q80Z69;Q6PAJ6;Q5HZJ0	Q80UU5;B2X2E1;Q7TMI8;Q6PF88;F6QX82;Q80Z69;Q6PAJ6;Q5HZJ0	Ribonuclease 3	Drosha	tr|Q80UU5|Q80UU5_MOUSE Rnasen protein (Fragment) OS=Mus musculus GN=Drosha PE=2 SV=1;tr|B2X2E1|B2X2E1_MOUSE ASL1/DROSHA fusion OS=Mus musculus PE=2 SV=1;tr|Q7TMI8|Q7TMI8_MOUSE Rnasen protein (Fragment) OS=Mus musculus GN=Drosha PE=2 SV=1;tr|Q6PF88|Q6PF88_M	0	14325000	27724000	955660	0	325570	630090	0	19475000	35183000	1	1	1	2	2	2	82.083	0.001234	2.2419	42049000	2	0	1	1	0	1	1	0	1	1	0	1	1
687	B2Z895;Q8CDS6;B2Z893;Q6GTL7;P70265;B2Z892;B2Z894	B2Z895;Q8CDS6;B2Z893;Q6GTL7;P70265;B2Z892	6-phosphofructo-2-kinase/fructose-2,6-bisphosphatase 2;6-phosphofructo-2-kinase;Fructose-2,6-bisphosphatase	Pfkfb2	tr|B2Z895|B2Z895_MOUSE 6-phosphofructo-2-kinase/fructose-2, 6-bisphosphatase 2 variant 7 OS=Mus musculus GN=Pfkfb2 PE=2 SV=1;tr|Q8CDS6|Q8CDS6_MOUSE Putative uncharacterized protein OS=Mus musculus GN=Pfkfb2 PE=2 SV=1;tr|B2Z893|B2Z893_MOUSE 6-phosphofructo-	0	41713000	0	1438400	0	1438400	0	0	44657000	0	4	1	1	10.7	3	3	42.286	0.0003335	3.245	41713000	2	0	1	1	1	2	3	0	1	1	0	1	1
688	B2ZAC8;Q8R3L2-4;Q8R3L2-3;Q8R3L2-2;Q8R3L2-5;Q8R3L2;Q80TL2	B2ZAC8;Q8R3L2-4;Q8R3L2-3;Q8R3L2-2;Q8R3L2-5;Q8R3L2;Q80TL2	Transcription factor 25	Tcf25	tr|B2ZAC8|B2ZAC8_MOUSE Nuclear localized protein-1 isoform d (Fragment) OS=Mus musculus GN=Tcf25 PE=2 SV=1;sp|Q8R3L2-4|TCF25_MOUSE Isoform 4 of Transcription factor 25 OS=Mus musculus GN=Tcf25;sp|Q8R3L2-3|TCF25_MOUSE Isoform 3 of Transcription factor 25 OS	136950000	171880000	77630000	10735000	3804200	4774600	2156400	168580000	155220000	97757000	8	8	8	18.9	18.9	18.9	73.951	0	19.038	386460000	10	4	5	1	4	5	2	4	5	2	4	5	2
689	H3BKS1;H3BJJ6;H3BJD1;E2D881;Q3TI69;H3BJQ3;Q3U5C5;B5T0I9;H3BKE5;E9QMH1;H3BJ44;H3BJL0;Q99J72-3;Q99J72-4;Q99J72-2;Q99J72	H3BKS1;H3BJJ6;H3BJD1;E2D881;Q3TI69;H3BJQ3;Q3U5C5;B5T0I9;H3BKE5;E9QMH1;H3BJ44;H3BJL0;Q99J72-3;Q99J72-4;Q99J72-2;Q99J72	DNA dC->dU-editing enzyme APOBEC-3	Apobec3;Apobec	tr|H3BKS1|H3BKS1_MOUSE DNA dC->dU-editing enzyme APOBEC-3 (Fragment) OS=Mus musculus GN=Apobec3 PE=4 SV=1;tr|H3BJJ6|H3BJJ6_MOUSE DNA dC->dU-editing enzyme APOBEC-3 (Fragment) OS=Mus musculus GN=Apobec3 PE=4 SV=1;tr|H3BJD1|H3BJD1_MOUSE DNA dC->dU-editing en	22344000	0	0	4468800	4468800	0	0	21384000	0	0	1	1	1	17.6	17.6	17.6	10.098	0.0028401	1.7282	22344000	1	1	0	0	1	0	0	1	0	0	1	0	0
690	B5THE3	B5THE3		Sis	tr|B5THE3|B5THE3_MOUSE Sucrase-isomaltase OS=Mus musculus GN=Sis PE=2 SV=1	97730000	56003000	106780000	2801200	1050900	602190	1148200	94476000	118750000	90362000	1	1	1	0.4	0.4	0.4	209.1	0.0064075	1.3509	260510000	5	2	1	2	1	1	1	1	1	1	1	1	1
691	B6YY24;Q3UVG3	B6YY24;Q3UVG3	Protein FAM91A1	D15Ertd621e;Fam91a1	tr|B6YY24|B6YY24_MOUSE DNA segment, Chr 15, ERATO Doi 621, expressed, isoform CRA_a OS=Mus musculus GN=D15Ertd621e PE=2 SV=1;sp|Q3UVG3|F91A1_MOUSE Protein FAM91A1 OS=Mus musculus GN=Fam91a1 PE=2 SV=1	961640000	501320000	888130000	52247000	21370000	11141000	19736000	1059200000	787960000	1027000000	18	18	18	27.1	27.1	27.1	93.462	0	61.401	2351100000	49	20	13	16	14	9	12	14	9	12	14	9	12
692	B6ZHD0;O70318;Q80UE3;Q3UNQ6;Q80UE5;Q80UE4;B6ZHC7;B6ZHC5;Q811B2;B6ZHC6;Q8C928;Q8CGJ6;Q811C0;Q7TPN6;Q8BSR4;Q9EPM8	B6ZHD0;O70318;Q80UE3;Q3UNQ6;Q80UE5;Q80UE4;B6ZHC7;B6ZHC5;Q811B2;B6ZHC6;Q8C928;Q8CGJ6	Band 4.1-like protein 2	Epb4.1l2;Epb41l2	tr|B6ZHD0|B6ZHD0_MOUSE Erythrocyte protein band 4.1-like 2 OS=Mus musculus GN=Epb4.1l2 PE=2 SV=1;sp|O70318|E41L2_MOUSE Band 4.1-like protein 2 OS=Mus musculus GN=Epb41l2 PE=1 SV=2;tr|Q80UE3|Q80UE3_MOUSE Protein 4.1G OS=Mus musculus GN=Epb4.1l2 PE=2 SV=1;tr	10592000000	11382000000	10383000000	505580000	165500000	177840000	162240000	11597000000	12740000000	11771000000	48	48	44	59.4	59.4	55.8	109.89	0	323.31	32357000000	224	71	76	77	41	42	45	41	42	45	37	38	41
693	B7FAU9;Q8BTM8;B9EKP5;B7FAV1;Q6KAM8;Q3U7N9;F6XC15;J3JS91;Q4FZG4;I7HPX4;F6Z2C0;Q8BTM8-2;Q9JJ37;F7AVL7	B7FAU9;Q8BTM8;B9EKP5;B7FAV1;Q6KAM8	Filamin-A	Flna	tr|B7FAU9|B7FAU9_MOUSE Filamin, alpha OS=Mus musculus GN=Flna PE=1 SV=1;sp|Q8BTM8|FLNA_MOUSE Filamin-A OS=Mus musculus GN=Flna PE=1 SV=5;tr|B9EKP5|B9EKP5_MOUSE Filamin, alpha OS=Mus musculus GN=Flna PE=2 SV=1;tr|B7FAV1|B7FAV1_MOUSE Filamin, alpha (Fragment	105670000000	100420000000	110630000000	2097500000	699790000	665030000	732640000	121030000000	119000000000	118570000000	143	143	131	72.4	72.4	68.9	280.5	0	323.31	316710000000	1087	351	372	364	133	135	138	133	135	138	121	123	126
694	Q4FJV4;B7STB7;P10107;Q4FK88;Q3U5N9;Q3US43	Q4FJV4;B7STB7;P10107;Q4FK88;Q3U5N9;Q3US43	Annexin;Annexin A1	Anxa1	tr|Q4FJV4|Q4FJV4_MOUSE Annexin OS=Mus musculus GN=Anxa1 PE=2 SV=1;tr|B7STB7|B7STB7_MOUSE Annexin OS=Mus musculus GN=Anxa1 PE=2 SV=1;sp|P10107|ANXA1_MOUSE Annexin A1 OS=Mus musculus GN=Anxa1 PE=1 SV=2;tr|Q4FK88|Q4FK88_MOUSE Annexin OS=Mus musculus GN=Anxa1	195400000000	158070000000	177570000000	21241000000	7815800000	6322700000	7102600000	208480000000	193770000000	207650000000	39	38	38	82.9	82.9	82.9	38.734	0	323.31	531030000000	1409	465	471	473	39	38	37	38	37	36	38	37	36
695	B7U582;P17156	B7U582;P17156	Heat shock-related 70 kDa protein 2	Hspa2	tr|B7U582|B7U582_MOUSE Heat shock protein 70-2 OS=Mus musculus PE=3 SV=1;sp|P17156|HSP72_MOUSE Heat shock-related 70 kDa protein 2 OS=Mus musculus GN=Hspa2 PE=1 SV=2	247010000	325580000	316250000	21679000	6024500	7941000	7713400	406530000	302700000	351950000	23	6	6	36.3	12.2	12.2	69.723	0	8.3259	888840000	10	3	4	3	18	19	20	3	4	4	3	4	4
696	B7ZBX7;F8WGP0;Q8BG17;B7ZCM5	B7ZBX7;F8WGP0;Q8BG17;B7ZCM5	Nucleolar protein 12	Nol12	tr|B7ZBX7|B7ZBX7_MOUSE Nucleolar protein 12 OS=Mus musculus GN=Nol12 PE=4 SV=1;tr|F8WGP0|F8WGP0_MOUSE Nucleolar protein 12 (Fragment) OS=Mus musculus GN=Nol12 PE=4 SV=1;sp|Q8BG17|NOL12_MOUSE Nucleolar protein 12 OS=Mus musculus GN=Nol12 PE=2 SV=1;tr|B7ZCM5	27194000	26246000	0	5344100	2719400	2624600	0	40065000	28558000	0	2	2	2	9.8	9.8	9.8	20.278	0.0062646	1.3564	53441000	3	2	1	0	2	1	0	2	1	0	2	1	0
697	Q569Y6;B7ZBY7;E9PY39;Q9CZY3;Q9CZY3-2;B7ZBY6;D3Z6R2	Q569Y6;B7ZBY7;E9PY39;Q9CZY3;Q9CZY3-2;B7ZBY6	Ubiquitin-conjugating enzyme E2 variant 1	Ube2v1;Gm20431	tr|Q569Y6|Q569Y6_MOUSE Ubiquitin-conjugating enzyme E2 variant 1 OS=Mus musculus GN=Ube2v1 PE=2 SV=1;tr|B7ZBY7|B7ZBY7_MOUSE Ubiquitin-conjugating enzyme E2 variant 1 OS=Mus musculus GN=Ube2v1 PE=4 SV=1;tr|E9PY39|E9PY39_MOUSE Protein Gm20431 OS=Mus musculus	105860000	141300000	209200000	38029000	8821500	11775000	17433000	132000000	190810000	164600000	8	2	2	61.9	19	19	16.355	0	5.7689	456350000	4	1	1	2	7	7	8	2	2	2	2	2	2
698	B7ZCL8;Q542P4;P70290;Q684Q6;A2AN84;B7ZCL9;B7ZCM0;Q3THA8;B7ZCM1;D6RFD5	B7ZCL8;Q542P4;P70290;Q684Q6;A2AN84	55 kDa erythrocyte membrane protein	Mpp1	tr|B7ZCL8|B7ZCL8_MOUSE 55 kDa erythrocyte membrane protein OS=Mus musculus GN=Mpp1 PE=1 SV=1;tr|Q542P4|Q542P4_MOUSE Membrane protein, palmitoylated OS=Mus musculus GN=Mpp1 PE=2 SV=1;sp|P70290|EM55_MOUSE 55 kDa erythrocyte membrane protein OS=Mus musculus G	1002200000	554040000	883320000	84123000	34558000	19105000	30459000	949590000	965180000	903890000	11	11	11	44.2	44.2	44.2	49.784	0	41.908	2439600000	35	13	9	13	9	8	9	9	8	9	9	8	9
699	B7ZCN0;B7ZCM9;E0CXG8;P0C872;Q06G06;B7ZCM8;P0C871	B7ZCN0;B7ZCM9;E0CXG8;P0C872	JmjC domain-containing protein 7	Gm28042;Jmjd7	tr|B7ZCN0|B7ZCN0_MOUSE Protein Gm28042 OS=Mus musculus GN=Gm28042 PE=4 SV=1;tr|B7ZCM9|B7ZCM9_MOUSE Protein Gm28042 OS=Mus musculus GN=Gm28042 PE=4 SV=1;tr|E0CXG8|E0CXG8_MOUSE Protein Gm28042 OS=Mus musculus GN=Gm28042 PE=4 SV=1;sp|P0C872|JMJD7_MOUSE JmjC d	110660000	23169000	114780000	5073700	2258400	472840	2342500	127900000	64593000	84430000	4	4	4	5.6	5.6	5.6	100.51	0.00033173	3.1688	248610000	7	3	2	2	3	2	2	3	2	2	3	2	2
700	B7ZCP4;Q8C166;Q3U893;E9Q806;A3KGK7;B7ZCP6;B7ZCP5;B7ZCP7;Q571A1;V9GWY2;V9GX86;B7ZCP8;F6R587;V9GXM6	B7ZCP4;Q8C166;Q3U893;E9Q806;A3KGK7;B7ZCP6;B7ZCP5;B7ZCP7;Q571A1	Copine-1	Cpne1	tr|B7ZCP4|B7ZCP4_MOUSE Copine-1 OS=Mus musculus GN=Cpne1 PE=1 SV=1;sp|Q8C166|CPNE1_MOUSE Copine-1 OS=Mus musculus GN=Cpne1 PE=1 SV=1;tr|Q3U893|Q3U893_MOUSE Putative uncharacterized protein OS=Mus musculus GN=Cpne1 PE=2 SV=1;tr|E9Q806|E9Q806_MOUSE Copine-1	2720000000	3180300000	3486700000	469350000	136000000	159010000	174330000	3249900000	3526500000	3506600000	20	20	19	61	61	59.2	52.853	0	99.015	9386900000	78	26	22	30	15	16	18	15	16	18	14	15	17
701	B7ZCR6;Q6PHP4;Q6ZPW1;F6R5G3	B7ZCR6;Q6PHP4;Q6ZPW1		Znf512b	tr|B7ZCR6|B7ZCR6_MOUSE Protein Znf512b OS=Mus musculus GN=Znf512b PE=4 SV=1;tr|Q6PHP4|Q6PHP4_MOUSE MCG140111, isoform CRA_c (Fragment) OS=Mus musculus GN=Znf512b PE=2 SV=1;tr|Q6ZPW1|Q6ZPW1_MOUSE MCG140111, isoform CRA_b (Fragment) OS=Mus musculus GN=Znf512	54027000	6429300	26558000	1338700	831190	98912	408580	57346000	0	0	4	4	4	8.6	8.6	8.6	95.329	0	4.4649	87014000	4	2	1	1	2	1	1	2	1	1	2	1	1
702	D6RJJ8;B7ZCV4;B9EID1;Q8BGB8;Q8BLS2	D6RJJ8;B7ZCV4;B9EID1;Q8BGB8;Q8BLS2	Ubiquinone biosynthesis protein COQ4 homolog, mitochondrial	Coq4	tr|D6RJJ8|D6RJJ8_MOUSE Ubiquinone biosynthesis protein COQ4 homolog, mitochondrial OS=Mus musculus GN=Coq4 PE=4 SV=1;tr|B7ZCV4|B7ZCV4_MOUSE Ubiquinone biosynthesis protein COQ4 homolog, mitochondrial (Fragment) OS=Mus musculus GN=Coq4 PE=3 SV=2;tr|B9EID1|B	8711300	0	106900000	11562000	871130	0	10690000	0	0	118370000	2	2	2	17.1	17.1	17.1	15.462	0.0016825	2.1134	115620000	3	1	0	2	1	0	2	1	0	2	1	0	2
703	B7ZMP1;B7ZMP1-2;E9Q1R1	B7ZMP1;B7ZMP1-2	Probable Xaa-Pro aminopeptidase 3	Xpnpep3	sp|B7ZMP1|XPP3_MOUSE Probable Xaa-Pro aminopeptidase 3 OS=Mus musculus GN=Xpnpep3 PE=2 SV=1;sp|B7ZMP1-2|XPP3_MOUSE Isoform 2 of Probable Xaa-Pro aminopeptidase 3 OS=Mus musculus GN=Xpnpep3	57758000	84964000	193980000	10861000	1863200	2740800	6257400	146960000	138670000	180340000	5	5	5	18.2	18.2	18.2	56.677	0	13.532	336700000	14	2	5	7	3	5	5	3	5	5	3	5	5
704	D3YVC8;F6UDW0;F6WLR1;B7ZMQ0;Q14AI6-2;Q14AI6	D3YVC8;F6UDW0;F6WLR1;B7ZMQ0;Q14AI6-2;Q14AI6	RNA pseudouridylate synthase domain-containing protein 3	Rpusd3	tr|D3YVC8|D3YVC8_MOUSE RNA pseudouridylate synthase domain-containing protein 3 (Fragment) OS=Mus musculus GN=Rpusd3 PE=4 SV=1;tr|F6UDW0|F6UDW0_MOUSE RNA pseudouridylate synthase domain-containing protein 3 (Fragment) OS=Mus musculus GN=Rpusd3 PE=4 SV=1;tr	13343000	10536000	18647000	3866000	1213000	957810	1695200	18624000	12797000	20810000	1	1	1	12	12	12	12.959	0.00032436	2.8617	42526000	3	1	1	1	1	1	1	1	1	1	1	1	1
705	B7ZMQ9;F6R4N2;Q0VBQ7;E9QAD0;Q3UEQ1;D3YTM1;E9Q9A0;D3YUD3;D3YUL8;D3Z230	B7ZMQ9;F6R4N2;Q0VBQ7;E9QAD0;Q3UEQ1;D3YTM1;E9Q9A0;D3YUD3;D3YUL8;D3Z230		Inpp4a	tr|B7ZMQ9|B7ZMQ9_MOUSE Inpp4a protein OS=Mus musculus GN=Inpp4a PE=2 SV=1;tr|F6R4N2|F6R4N2_MOUSE Type I inositol 3,4-bisphosphate 4-phosphatase OS=Mus musculus GN=Inpp4a PE=4 SV=1;tr|Q0VBQ7|Q0VBQ7_MOUSE Inositol polyphosphate-4-phosphatase, type I OS=Mus m	0	0	34239000	951080	0	0	951080	0	0	32412000	2	2	2	4.4	4.4	4.4	76.395	0	6.1594	34239000	2	0	0	2	0	0	2	0	0	2	0	0	2
706	Q6ZQC1;B7ZMR5;Q6PFH7;Q3U829	Q6ZQC1;B7ZMR5;Q6PFH7;Q3U829	AP-5 complex subunit zeta-1	mKIAA0415;Ap5z1	tr|Q6ZQC1|Q6ZQC1_MOUSE MKIAA0415 protein (Fragment) OS=Mus musculus GN=mKIAA0415 PE=4 SV=1;tr|B7ZMR5|B7ZMR5_MOUSE C330006K01Rik protein (Fragment) OS=Mus musculus GN=Ap5z1 PE=2 SV=1;tr|Q6PFH7|Q6PFH7_MOUSE C330006K01Rik protein (Fragment) OS=Mus musculus GN	36064000	34953000	37572000	3016400	1001800	970910	1043700	41414000	45018000	46451000	3	3	3	6.4	6.4	6.4	68.884	0.000171	3.7363	108590000	4	2	1	1	3	2	1	3	2	1	3	2	1
707	D3YV79;B7ZMR9;Q0VEE6;D3YZL3	D3YV79;B7ZMR9;Q0VEE6;D3YZL3	Zinc finger protein 800	Zfp800;Znf800	tr|D3YV79|D3YV79_MOUSE Zinc finger protein 800 (Fragment) OS=Mus musculus GN=Zfp800 PE=1 SV=1;tr|B7ZMR9|B7ZMR9_MOUSE MCG12507, isoform CRA_a OS=Mus musculus GN=Zfp800 PE=2 SV=1;sp|Q0VEE6|ZN800_MOUSE Zinc finger protein 800 OS=Mus musculus GN=Znf800 PE=1 SV	54902000	41240000	55899000	6610500	2387000	1793000	2430400	43554000	72255000	69524000	4	4	4	11.7	11.7	11.7	52.711	0	4.3702	152040000	5	2	1	2	3	1	2	3	1	2	3	1	2
708	B7ZMT1;Q8BWD8;E0CYC4;Q8BKC7;G5E8L1;E0CY29;E0CZC3	B7ZMT1;Q8BWD8;E0CYC4;Q8BKC7;G5E8L1	Cyclin-dependent kinase 19	Cdk19;Cdk8	tr|B7ZMT1|B7ZMT1_MOUSE Cdc2l6 protein OS=Mus musculus GN=Cdk19 PE=2 SV=1;sp|Q8BWD8|CDK19_MOUSE Cyclin-dependent kinase 19 OS=Mus musculus GN=Cdk19 PE=2 SV=1;tr|E0CYC4|E0CYC4_MOUSE Cyclin-dependent kinase 8 (Fragment) OS=Mus musculus GN=Cdk8 PE=3 SV=1;tr|Q8	78135000	56925000	0	5402400	3125400	2277000	0	84654000	96227000	0	5	5	1	9.2	9.2	1.6	56.569	0	4.466	135060000	8	4	3	1	3	3	1	3	3	1	0	0	1
709	B7ZMU2;F8WI26;E9QJT6;Q68ED3;F6UPY1	B7ZMU2;F8WI26;E9QJT6;Q68ED3	Non-canonical poly(A) RNA polymerase PAPD5	Papd5	tr|B7ZMU2|B7ZMU2_MOUSE Papd5 protein OS=Mus musculus GN=Papd5 PE=2 SV=1;tr|F8WI26|F8WI26_MOUSE Non-canonical poly(A) RNA polymerase PAPD5 OS=Mus musculus GN=Papd5 PE=1 SV=1;tr|E9QJT6|E9QJT6_MOUSE Non-canonical poly(A) RNA polymerase PAPD5 OS=Mus musculus G	79697000	99102000	82212000	6868700	2097300	2607900	2163500	102430000	108560000	108900000	7	7	7	18.1	18.1	18.1	64.8	0	7.8584	261010000	15	4	6	5	4	6	5	4	6	5	4	6	5
710	B7ZN02;Q5DTX6	B7ZN02;Q5DTX6	Junctional protein associated with coronary artery disease	9430020K01Rik;Jcad	tr|B7ZN02|B7ZN02_MOUSE MCG55337 OS=Mus musculus GN=9430020K01Rik PE=2 SV=1;sp|Q5DTX6|JCAD_MOUSE Junctional protein associated with coronary artery disease OS=Mus musculus GN=Jcad PE=1 SV=2	123130000	180020000	119990000	5495300	1599100	2337900	1558300	150950000	186730000	134390000	11	11	11	15.2	15.2	15.2	144.8	0	13.608	423140000	16	6	7	3	6	7	3	6	7	3	6	7	3
711	B7ZN11;Q8C398	B7ZN11;Q8C398	Phosphatidylinositol-glycan biosynthesis class W protein	Pigw	tr|B7ZN11|B7ZN11_MOUSE Phosphatidylinositol-glycan biosynthesis class W protein OS=Mus musculus GN=Pigw PE=2 SV=1;sp|Q8C398|PIGW_MOUSE Phosphatidylinositol-glycan biosynthesis class W protein OS=Mus musculus GN=Pigw PE=2 SV=1	59926000	56673000	58238000	9201900	3154000	2982800	3065200	81197000	70273000	81243000	3	3	3	5.6	5.6	5.6	56.84	0	4.9626	174840000	6	3	2	1	3	3	2	3	3	2	3	3	2
712	B7ZNA7;E9QQ68;Q6A039	B7ZNA7;E9QQ68;Q6A039	TBC1 domain family member 12	Tbc1d12	tr|B7ZNA7|B7ZNA7_MOUSE Tbc1d12 protein OS=Mus musculus GN=Tbc1d12 PE=2 SV=1;tr|E9QQ68|E9QQ68_MOUSE TBC1 domain family member 12 OS=Mus musculus GN=Tbc1d12 PE=1 SV=1;sp|Q6A039|TBC12_MOUSE TBC1 domain family member 12 OS=Mus musculus GN=Tbc1d12 PE=1 SV=2	57035000	69410000	41701000	4311400	1462400	1779700	1069300	64227000	67891000	58999000	5	5	5	12.9	12.9	12.9	67.873	0	5.2238	168150000	3	1	1	1	3	4	2	3	4	2	3	4	2
713	E9QMU1;J3QNW9;B7ZNG0-2;B7ZNG0	E9QMU1;J3QNW9;B7ZNG0-2;B7ZNG0	Kinesin-like protein;Kinesin-like protein KIF7	Kif7	tr|E9QMU1|E9QMU1_MOUSE Kinesin-like protein KIF7 OS=Mus musculus GN=Kif7 PE=3 SV=1;tr|J3QNW9|J3QNW9_MOUSE Kinesin-like protein KIF7 OS=Mus musculus GN=Kif7 PE=3 SV=1;sp|B7ZNG0-2|KIF7_MOUSE Isoform 2 of Kinesin-like protein KIF7 OS=Mus musculus GN=Kif7;sp|B	6566300	28092000	0	407750	77251	330500	0	10277000	35639000	0	1	1	1	0.9	0.9	0.9	151.54	0.00032347	2.8421	34659000	2	1	1	0	1	1	0	1	1	0	1	1	0
714	B7ZNG4	B7ZNG4	Tastin	Troap	sp|B7ZNG4|TROAP_MOUSE Tastin OS=Mus musculus GN=Troap PE=2 SV=1	15043000	28756000	23429000	1680700	376060	718900	585720	2153000	40108000	30383000	2	2	2	5.1	5.1	5.1	71.958	0.00093226	2.3403	67228000	3	1	1	1	2	1	1	2	1	1	2	1	1
715	B7ZNJ5;G3X907;Q9WTS6-2;Q9WTS6;F6RJC1;D3YW49	B7ZNJ5;G3X907;Q9WTS6-2;Q9WTS6;F6RJC1	Teneurin-3	Tenm3	tr|B7ZNJ5|B7ZNJ5_MOUSE Odz3 protein OS=Mus musculus GN=Tenm3 PE=2 SV=1;tr|G3X907|G3X907_MOUSE Odd Oz/ten-m homolog 3 (Drosophila) OS=Mus musculus GN=Tenm3 PE=4 SV=1;sp|Q9WTS6-2|TEN3_MOUSE Isoform 2 of Teneurin-3 OS=Mus musculus GN=Tenm3;sp|Q9WTS6|TEN3_MOUS	6146900000	6147600000	5685000000	126620000	43288000	43293000	40035000	6660200000	6651300000	7358200000	59	59	56	32.1	32.1	31	300.98	0	247.01	17979000000	193	65	67	61	49	46	45	49	46	45	46	43	43
716	B7ZNK7;Q3TYD9;P63002;P63002-2	B7ZNK7;Q3TYD9;P63002;P63002-2	Amino-terminal enhancer of split	Aes	tr|B7ZNK7|B7ZNK7_MOUSE Aes protein OS=Mus musculus GN=Aes PE=2 SV=1;tr|Q3TYD9|Q3TYD9_MOUSE Amino-terminal enhancer of split OS=Mus musculus GN=Aes PE=2 SV=1;sp|P63002|AES_MOUSE Amino-terminal enhancer of split OS=Mus musculus GN=Aes PE=1 SV=1;sp|P63002-2|A	63292000	38221000	36765000	15364000	7032500	4246800	4085000	62597000	55029000	55655000	3	3	3	25.5	25.5	25.5	21.871	0	5.7311	138280000	5	2	2	1	2	2	1	2	2	1	2	2	1
717	B7ZNK9;Q3UMC0;Q8CH38;Q9Z2U6;D6RGM7	B7ZNK9;Q3UMC0	Spermatogenesis-associated protein 5	Spata5	tr|B7ZNK9|B7ZNK9_MOUSE Spata5 protein OS=Mus musculus GN=Spata5 PE=2 SV=1;sp|Q3UMC0|SPAT5_MOUSE Spermatogenesis-associated protein 5 OS=Mus musculus GN=Spata5 PE=1 SV=2	6161600000	5981800000	6596600000	312330000	102690000	99697000	109940000	6912000000	7667300000	7585100000	24	24	23	37	37	35.6	97.267	0	68.6	18740000000	80	25	29	26	18	18	15	18	18	15	17	17	14
718	Q3ULP8;Q91VU7;B7ZNL8;Q69Z76;Q3UQN6;F7AC41;F6XMS4;F7CG42	Q3ULP8;Q91VU7;B7ZNL8;Q69Z76;Q3UQN6;F7AC41		Pus7	tr|Q3ULP8|Q3ULP8_MOUSE Putative uncharacterized protein OS=Mus musculus GN=Pus7 PE=2 SV=1;tr|Q91VU7|Q91VU7_MOUSE Protein Pus7 OS=Mus musculus GN=Pus7 PE=2 SV=2;tr|B7ZNL8|B7ZNL8_MOUSE Pus7 protein OS=Mus musculus GN=Pus7 PE=2 SV=1;tr|Q69Z76|Q69Z76_MOUSE MKI	1632500000	2304300000	2107600000	151110000	40813000	57607000	52690000	2518500000	2432600000	2439600000	22	22	22	49.9	49.9	49.9	73.877	0	56.308	6044400000	69	23	24	22	17	15	16	17	15	16	17	15	16
719	B7ZNP0;B7ZNN9;Q2HXL6	B7ZNP0;B7ZNN9;Q2HXL6	alpha-1,2-Mannosidase;ER degradation-enhancing alpha-mannosidase-like protein 3	Edem3	tr|B7ZNP0|B7ZNP0_MOUSE Edem3 protein OS=Mus musculus GN=Edem3 PE=2 SV=1;tr|B7ZNN9|B7ZNN9_MOUSE Edem3 protein OS=Mus musculus GN=Edem3 PE=2 SV=1;sp|Q2HXL6|EDEM3_MOUSE ER degradation-enhancing alpha-mannosidase-like protein 3 OS=Mus musculus GN=Edem3 PE=1 SV	33586000	21712000	69633000	2776300	746370	482490	1547400	60051000	35551000	57774000	3	3	3	3.7	3.7	3.7	102.22	0.00016844	3.4283	124930000	5	1	3	1	2	2	2	2	2	2	2	2	2
720	B7ZNP3;B7ZNP2;Q3V4B5	B7ZNP3;B7ZNP2;Q3V4B5	COMM domain-containing protein 6	Commd6	tr|B7ZNP3|B7ZNP3_MOUSE COMM domain-containing protein 6 OS=Mus musculus GN=Commd6 PE=2 SV=1;tr|B7ZNP2|B7ZNP2_MOUSE COMM domain containing 6 OS=Mus musculus GN=Commd6 PE=2 SV=1;sp|Q3V4B5|COMD6_MOUSE COMM domain-containing protein 6 OS=Mus musculus GN=Commd6	113420000	140560000	169790000	52972000	14177000	17570000	21224000	157030000	160260000	193500000	2	2	2	33.7	33.7	33.7	9.4097	0	5.7853	423780000	6	2	2	2	2	2	2	2	2	2	2	2	2
721	B7ZNS3;Q08619;C6EQG6;Q8BW36	B7ZNS3;Q08619	Interferon-activable protein 205-B	Mnda;Ifi205b	tr|B7ZNS3|B7ZNS3_MOUSE Mnda protein OS=Mus musculus GN=Mnda PE=2 SV=1;sp|Q08619|IFI5B_MOUSE Interferon-activable protein 205-B OS=Mus musculus GN=Ifi205b PE=1 SV=2	1429100000	1200100000	1611900000	169640000	57164000	48004000	64474000	1598600000	1894300000	1686500000	17	17	3	62.6	62.6	17.3	46.776	0	41.853	4241000000	58	21	16	21	13	12	15	13	12	15	3	0	1
722	B7ZNX0;Q9ESC8;B7ZC42	B7ZNX0;Q9ESC8;B7ZC42	AF4/FMR2 family member 4	Aff4	tr|B7ZNX0|B7ZNX0_MOUSE Aff4 protein OS=Mus musculus GN=Aff4 PE=2 SV=1;sp|Q9ESC8|AFF4_MOUSE AF4/FMR2 family member 4 OS=Mus musculus GN=Aff4 PE=1 SV=1;tr|B7ZC42|B7ZC42_MOUSE AF4/FMR2 family member 4 (Fragment) OS=Mus musculus GN=Aff4 PE=4 SV=1	0	181340000	74138000	3702500	0	2628000	1074500	0	131490000	152650000	3	3	3	3.8	3.8	3.8	123.35	0.00093124	2.3267	255470000	4	0	2	2	0	2	2	0	2	2	0	2	2
723	B7ZNX2;P53995;A2ATQ5;Q3TP10;Q3UE43	B7ZNX2;P53995;A2ATQ5	Anaphase-promoting complex subunit 1	Anapc1	tr|B7ZNX2|B7ZNX2_MOUSE Anaphase promoting complex subunit 1 OS=Mus musculus GN=Anapc1 PE=2 SV=1;sp|P53995|APC1_MOUSE Anaphase-promoting complex subunit 1 OS=Mus musculus GN=Anapc1 PE=2 SV=2;tr|A2ATQ5|A2ATQ5_MOUSE Anaphase-promoting complex subunit 1 OS=Mus	1373100000	1228900000	1416800000	39789000	13595000	12167000	14028000	1609700000	1877000000	1476600000	33	33	33	27.2	27.2	27.2	215.99	0	97.548	4018700000	92	32	28	32	26	23	24	26	23	24	26	23	24
724	B7ZP24;Q3UK78-2;Q3UK78	B7ZP24;Q3UK78-2;Q3UK78	Polycomb group RING finger protein 5	Pcgf5	tr|B7ZP24|B7ZP24_MOUSE Pcgf5 protein OS=Mus musculus GN=Pcgf5 PE=2 SV=1;sp|Q3UK78-2|PCGF5_MOUSE Isoform 2 of Polycomb group RING finger protein 5 OS=Mus musculus GN=Pcgf5;sp|Q3UK78|PCGF5_MOUSE Polycomb group RING finger protein 5 OS=Mus musculus GN=Pcgf5 P	12873000	9905100	13641000	2601400	919530	707510	974380	20698000	13466000	17311000	1	1	1	4.3	4.3	4.3	29.528	0.0048565	1.4913	36420000	3	1	1	1	1	1	1	1	1	1	1	1	1
725	B7ZP28;Q8C4S8;D3Z1C6;G3UYA7;E9Q4E4;Q6P9P8-2;Q6P9P8	B7ZP28;Q8C4S8	DENN domain-containing protein 2A	Dennd2a	tr|B7ZP28|B7ZP28_MOUSE Dennd2a protein OS=Mus musculus GN=Dennd2a PE=2 SV=1;sp|Q8C4S8|DEN2A_MOUSE DENN domain-containing protein 2A OS=Mus musculus GN=Dennd2a PE=1 SV=1	153450000	128360000	119300000	7037000	2692200	2251900	2093000	179950000	147480000	160160000	11	11	10	13.9	13.9	12.8	112.93	0	18.711	401110000	21	9	6	6	8	7	6	8	7	6	7	6	5
726	D6RFD6;B7ZP34;Q8C3B8;E9Q0V1	D6RFD6;B7ZP34;Q8C3B8;E9Q0V1	Protein RFT1 homolog	Rft1	tr|D6RFD6|D6RFD6_MOUSE Protein RFT1 homolog OS=Mus musculus GN=Rft1 PE=4 SV=1;tr|B7ZP34|B7ZP34_MOUSE Rft1 protein OS=Mus musculus GN=Rft1 PE=2 SV=1;sp|Q8C3B8|RFT1_MOUSE Protein RFT1 homolog OS=Mus musculus GN=Rft1 PE=2 SV=2;tr|E9Q0V1|E9Q0V1_MOUSE Protein R	28617000	0	22299000	2995100	1683400	0	1311700	31814000	0	30465000	2	2	2	6.8	6.8	6.8	42.529	0.00032383	2.8496	50916000	5	3	0	2	2	0	2	2	0	2	2	0	2
727	B7ZP45;P70193	B7ZP45;P70193	Leucine-rich repeats and immunoglobulin-like domains protein 1	Lrig1	tr|B7ZP45|B7ZP45_MOUSE Lrig1 protein OS=Mus musculus GN=Lrig1 PE=2 SV=1;sp|P70193|LRIG1_MOUSE Leucine-rich repeats and immunoglobulin-like domains protein 1 OS=Mus musculus GN=Lrig1 PE=2 SV=2	85673000	143750000	196150000	7737600	1557700	2613600	3566400	197230000	176090000	175960000	9	9	9	17.2	17.2	17.2	113.68	0	23.94	425570000	23	6	9	8	6	6	8	6	6	8	6	6	8
728	B7ZP47;Q65Z40;F6YCH1;G3UXQ2	B7ZP47;Q65Z40;F6YCH1	Wings apart-like protein homolog	Wapal	tr|B7ZP47|B7ZP47_MOUSE Wapal protein OS=Mus musculus GN=Wapal PE=1 SV=1;sp|Q65Z40|WAPL_MOUSE Wings apart-like protein homolog OS=Mus musculus GN=Wapal PE=1 SV=2;tr|F6YCH1|F6YCH1_MOUSE Wings apart-like protein homolog (Fragment) OS=Mus musculus GN=Wapal PE=	1084200000	948950000	1101300000	41242000	14266000	12486000	14491000	1251300000	1117100000	1259000000	18	18	18	24.5	24.5	24.5	133.35	0	63.632	3134400000	49	17	17	15	12	12	12	12	12	12	12	12	12
729	B7ZW94;Q8C3F2-3;Q8C3F2;Q3V3X9;Q8C3F2-2	B7ZW94;Q8C3F2-3;Q8C3F2;Q3V3X9	Constitutive coactivator of PPAR-gamma-like protein 2	Fam120c	tr|B7ZW94|B7ZW94_MOUSE Family with sequence similarity 120, member C OS=Mus musculus GN=Fam120c PE=2 SV=1;sp|Q8C3F2-3|F120C_MOUSE Isoform 3 of Constitutive coactivator of PPAR-gamma-like protein 2 OS=Mus musculus GN=Fam120c;sp|Q8C3F2|F120C_MOUSE Constituti	501970000	674350000	479410000	36794000	11155000	14986000	10654000	817440000	694610000	714260000	16	14	14	22.8	20.8	20.8	119.66	0	38.855	1655700000	26	9	8	9	11	11	11	9	10	9	9	10	9
730	G5E8J2;B7ZW98;E9QNT8;G8JL84;D3YTV8;D3Z5M4;Q0VGY9;Q02357-5;Q02357-2;Q02357;Q02357-3;Q02357-4;Q02357-6;D6RJ51;G3UY11	G5E8J2;B7ZW98;E9QNT8;G8JL84;D3YTV8;D3Z5M4;Q0VGY9;Q02357-5;Q02357-2;Q02357;Q02357-3;Q02357-4;Q02357-6;D6RJ51;G3UY11	Ankyrin-1	Ank1	tr|G5E8J2|G5E8J2_MOUSE Ankyrin 1, erythroid OS=Mus musculus GN=Ank1 PE=1 SV=1;tr|B7ZW98|B7ZW98_MOUSE Ank1 protein OS=Mus musculus GN=Ank1 PE=1 SV=1;tr|E9QNT8|E9QNT8_MOUSE Ankyrin-1 OS=Mus musculus GN=Ank1 PE=1 SV=1;tr|G8JL84|G8JL84_MOUSE Ankyrin-1 OS=Mus m	56301000	0	47534000	1081600	586460	0	495150	56301000	0	46082000	3	2	2	1.9	1.2	1.2	202.52	0.0025457	1.7647	103830000	2	1	0	1	2	1	1	2	0	1	2	0	1
731	B7ZWA9;O88939-2;O88939;D3Z4C3;D3YVF8;D3YZI8	B7ZWA9;O88939-2;O88939;D3Z4C3;D3YVF8	Zinc finger and BTB domain-containing protein 7A	Zbtb7a	tr|B7ZWA9|B7ZWA9_MOUSE Zbtb7a protein OS=Mus musculus GN=Zbtb7a PE=2 SV=1;sp|O88939-2|ZBT7A_MOUSE Isoform 2 of Zinc finger and BTB domain-containing protein 7A OS=Mus musculus GN=Zbtb7a;sp|O88939|ZBT7A_MOUSE Zinc finger and BTB domain-containing protein 7A	111200000	182260000	55492000	13421000	4276800	7010100	2134300	190610000	176250000	84729000	5	5	5	12.7	12.7	12.7	60.328	0	6.458	348950000	9	4	4	1	4	4	1	4	4	1	4	4	1
732	Q545R3;Q3TSR4;Q3TD08;B7ZWC0;Q62433;E9Q514;E9Q0J8;E9PZC7;E9Q7G8;E9Q147;E9Q7V2;E9Q5I8;E9Q3F9;E9PVF3	Q545R3;Q3TSR4;Q3TD08;B7ZWC0;Q62433;E9Q514	Protein NDRG1	Ndrg1	tr|Q545R3|Q545R3_MOUSE N-myc downstream regulated gene 1 OS=Mus musculus GN=Ndrg1 PE=2 SV=1;tr|Q3TSR4|Q3TSR4_MOUSE Putative uncharacterized protein OS=Mus musculus GN=Ndrg1 PE=2 SV=1;tr|Q3TD08|Q3TD08_MOUSE Putative uncharacterized protein OS=Mus musculus G	161590000	158700000	220150000	33778000	10099000	9919000	13760000	209630000	200040000	195980000	4	4	4	15.7	15.7	15.7	43.008	0	11.463	540440000	12	4	4	4	3	3	3	3	3	3	3	3	3
733	B7ZWC4;Q07113;B9EKB8;Q8C2F9;Q8K0J1;Q8C6V9;Q80VF2;Q7TMR1;F6SFP4	B7ZWC4;Q07113;B9EKB8;Q8C2F9	Cation-independent mannose-6-phosphate receptor	Igf2r	tr|B7ZWC4|B7ZWC4_MOUSE Insulin-like growth factor 2 receptor OS=Mus musculus GN=Igf2r PE=2 SV=1;sp|Q07113|MPRI_MOUSE Cation-independent mannose-6-phosphate receptor OS=Mus musculus GN=Igf2r PE=1 SV=1;tr|B9EKB8|B9EKB8_MOUSE Insulin-like growth factor 2 rece	18079000000	16384000000	20740000000	411970000	134920000	122270000	154780000	21263000000	21898000000	23421000000	84	84	84	44.9	44.9	44.9	273.86	0	323.31	55204000000	414	135	140	139	75	72	78	75	72	78	75	72	78
734	B7ZWE5;Q3THY9;Q9Z0H7	B7ZWE5;Q3THY9;Q9Z0H7	B-cell lymphoma/leukemia 10	Bcl10	tr|B7ZWE5|B7ZWE5_MOUSE B-cell leukemia/lymphoma 10 OS=Mus musculus GN=Bcl10 PE=2 SV=1;tr|Q3THY9|Q3THY9_MOUSE Putative uncharacterized protein OS=Mus musculus GN=Bcl10 PE=2 SV=1;sp|Q9Z0H7|BCL10_MOUSE B-cell lymphoma/leukemia 10 OS=Mus musculus GN=Bcl10 PE=1	12347000	0	0	881950	881950	0	0	19852000	0	0	1	1	1	4.3	4.3	4.3	25.948	0.0082525	1.2823	12347000	1	1	0	0	1	0	0	1	0	0	1	0	0
735	B7ZWG9;V9GXF8	B7ZWG9		Hnrnpa1l2	tr|B7ZWG9|B7ZWG9_MOUSE Hnrnpa1l2 protein OS=Mus musculus GN=Hnrnpa1l2 PE=2 SV=1	0	91832000	0	6559500	0	6559500	0	0	98312000	0	6	1	1	22.9	4.7	4.7	29.073	1	-2	91832000	1	0	1	0	5	6	5	0	1	0	0	1	0
736	B7ZWK3	B7ZWK3		Sptan1	tr|B7ZWK3|B7ZWK3_MOUSE Spna2 protein OS=Mus musculus GN=Sptan1 PE=2 SV=1	0	0	0	0	0	0	0	0	0	0	142	1	0	67.3	0.4	0	282.89	1	-2	0	0	0	0	0	125	125	124	0	0	0	0	0	0
737	B7ZWL1;Q6ZQ08-2;B2RXR3;Q6ZQ08-3;Q505C5	B7ZWL1;Q6ZQ08-2;B2RXR3	CCR4-NOT transcription complex subunit 1	Cnot1	tr|B7ZWL1|B7ZWL1_MOUSE CCR4-NOT transcription complex subunit 1 OS=Mus musculus GN=Cnot1 PE=2 SV=1;sp|Q6ZQ08-2|CNOT1_MOUSE Isoform 2 of CCR4-NOT transcription complex subunit 1 OS=Mus musculus GN=Cnot1;tr|B2RXR3|B2RXR3_MOUSE Cnot1 protein OS=Mus musculus G	112910000	0	61119000	1308500	848960	0	459540	100080000	0	64837000	57	1	1	32	1.2	1.2	260.95	1	-2	174030000	3	2	0	1	45	43	39	1	0	1	1	0	1
738	B7ZWN1;Q80WE4-3;Q80WE4-4;Q80WE4;Q80WE4-2	B7ZWN1;Q80WE4-3;Q80WE4-4;Q80WE4;Q80WE4-2	Kinesin-like protein;Kinesin-like protein KIF20B	Kif20b	tr|B7ZWN1|B7ZWN1_MOUSE Kif20b protein OS=Mus musculus GN=Kif20b PE=2 SV=1;sp|Q80WE4-3|KI20B_MOUSE Isoform 3 of Kinesin-like protein KIF20B OS=Mus musculus GN=Kif20b;sp|Q80WE4-4|KI20B_MOUSE Isoform 4 of Kinesin-like protein KIF20B OS=Mus musculus GN=Kif20b;	339150000	521050000	486090000	11219000	2826200	4342100	4050800	475250000	575890000	624330000	21	21	21	15.3	15.3	15.3	198.98	0	40.209	1346300000	44	11	19	14	12	17	14	12	17	14	12	17	14
739	B8JJ57;Q3TBW8;B8JJ56;Q3UFX3;J3QN94;Q99PN3-2;Q99PN3;B8JJ53	B8JJ57;Q3TBW8;B8JJ56;Q3UFX3;J3QN94;Q99PN3-2;Q99PN3	Tripartite motif-containing protein 26	Trim26	tr|B8JJ57|B8JJ57_MOUSE Tripartite motif-containing protein 26 (Fragment) OS=Mus musculus GN=Trim26 PE=4 SV=1;tr|Q3TBW8|Q3TBW8_MOUSE Putative uncharacterized protein OS=Mus musculus GN=Trim26 PE=2 SV=1;tr|B8JJ56|B8JJ56_MOUSE Tripartite motif-containing prot	35609000	7685400	0	1967900	1618600	349340	0	52205000	0	0	3	3	3	13.4	13.4	13.4	29.168	0.00093023	2.3134	43294000	2	1	1	0	2	1	0	2	1	0	2	1	0
740	B8JJC1;Q8BJ37;Q6P1B8;D3Z075	B8JJC1;Q8BJ37;Q6P1B8	Tyrosyl-DNA phosphodiesterase 1	Tdp1	tr|B8JJC1|B8JJC1_MOUSE Tyrosyl-DNA phosphodiesterase 1 OS=Mus musculus GN=Tdp1 PE=4 SV=1;sp|Q8BJ37|TYDP1_MOUSE Tyrosyl-DNA phosphodiesterase 1 OS=Mus musculus GN=Tdp1 PE=2 SV=2;tr|Q6P1B8|Q6P1B8_MOUSE Tdp1 protein OS=Mus musculus GN=Tdp1 PE=2 SV=1	490600000	456260000	395850000	31969000	11681000	10863000	9425000	636170000	524950000	473150000	11	11	11	21	21	21	68.59	0	17.771	1342700000	38	12	12	14	9	7	8	9	7	8	9	7	8
741	B8JK51;Q8K015-2;Q8K015	B8JK51;Q8K015-2;Q8K015	Centromere protein O	Cenpo	tr|B8JK51|B8JK51_MOUSE Centromere protein O (Fragment) OS=Mus musculus GN=Cenpo PE=4 SV=1;sp|Q8K015-2|CENPO_MOUSE Isoform 2 of Centromere protein O OS=Mus musculus GN=Cenpo;sp|Q8K015|CENPO_MOUSE Centromere protein O OS=Mus musculus GN=Cenpo PE=2 SV=1	20303000	80032000	27531000	10655000	1691900	6669300	2294300	38782000	45600000	50981000	2	2	2	9.5	9.5	9.5	25.31	0.00017212	3.8792	127870000	3	1	1	1	1	2	1	1	2	1	1	2	1
742	B8X349;Q58A65-2;Q58A65;Q58A65-5;Q58A65-6;F8WH31;E9PUD1;Q58A65-3;Q58A65-4;Z4YMB8;F6SH61;Q8C7W0;Q6PA03;F6WNT4;A9CQK3;REV__Q3TU45;REV__Q9EPR5;REV__Q8CHA4	B8X349;Q58A65-2;Q58A65;Q58A65-5;Q58A65-6;F8WH31;E9PUD1;Q58A65-3;Q58A65-4;Z4YMB8;F6SH61;Q8C7W0	C-Jun-amino-terminal kinase-interacting protein 4	Spag9	tr|B8X349|B8X349_MOUSE JNK-interacting leucine zipper protein long form OS=Mus musculus GN=Spag9 PE=2 SV=1;sp|Q58A65-2|JIP4_MOUSE Isoform 2 of C-Jun-amino-terminal kinase-interacting protein 4 OS=Mus musculus GN=Spag9;sp|Q58A65|JIP4_MOUSE C-Jun-amino-termi	5488200000	5081300000	5223800000	205110000	71275000	65991000	67842000	6090100000	6644400000	5942000000	40	40	34	41.4	41.4	38.1	146.13	0	160.28	15793000000	164	60	48	56	33	29	32	33	29	32	29	26	29
743	B8ZXI1;Z4YJE9;B8ZXI1-2	B8ZXI1;Z4YJE9;B8ZXI1-2	Queuine tRNA-ribosyltransferase subunit QTRTD1	Qtrtd1	sp|B8ZXI1|QTRD1_MOUSE Queuine tRNA-ribosyltransferase subunit QTRTD1 OS=Mus musculus GN=Qtrtd1 PE=1 SV=2;tr|Z4YJE9|Z4YJE9_MOUSE Queuine tRNA-ribosyltransferase subunit QTRTD1 OS=Mus musculus GN=Qtrtd1 PE=3 SV=1;sp|B8ZXI1-2|QTRD1_MOUSE Isoform 2 of Queuine	376290000	237550000	262920000	39852000	17104000	10798000	11951000	464710000	257700000	413610000	6	6	6	21.9	21.9	21.9	46.288	0	22.562	876750000	13	7	2	4	5	4	3	5	4	3	5	4	3
744	B9EHE8;E9Q9Q2;Q3URW7;Q80U91;Q80ZH9;Q8BQ07	B9EHE8;E9Q9Q2;Q3URW7;Q80U91;Q80ZH9		R3hdm1	tr|B9EHE8|B9EHE8_MOUSE R3hdm1 protein OS=Mus musculus GN=R3hdm1 PE=2 SV=1;tr|E9Q9Q2|E9Q9Q2_MOUSE Protein R3hdm1 OS=Mus musculus GN=R3hdm1 PE=1 SV=1;tr|Q3URW7|Q3URW7_MOUSE Putative uncharacterized protein (Fragment) OS=Mus musculus GN=R3hdm1 PE=2 SV=1;tr|Q8	8461000	107720000	58846000	4606000	222660	2834800	1548600	11352000	0	70137000	6	6	6	6.2	6.2	6.2	120.87	0	7.4738	175030000	5	1	2	2	2	2	3	2	2	3	2	2	3
745	B9EHJ3;P39447;Q91YW2	B9EHJ3;P39447	Tight junction protein ZO-1	Tjp1	tr|B9EHJ3|B9EHJ3_MOUSE Tight junction protein ZO-1 OS=Mus musculus GN=Tjp1 PE=1 SV=1;sp|P39447|ZO1_MOUSE Tight junction protein ZO-1 OS=Mus musculus GN=Tjp1 PE=1 SV=2	3830100000	4054000000	5124900000	127540000	37550000	39746000	50244000	4740200000	5156300000	5364900000	53	53	53	41.9	41.9	41.9	188.85	0	262.56	13009000000	191	65	55	71	41	41	46	41	41	46	41	41	46
746	B9EHN0;Q02053	B9EHN0;Q02053	Ubiquitin-like modifier-activating enzyme 1	Uba1	tr|B9EHN0|B9EHN0_MOUSE Ubiquitin-activating enzyme E1, Chr X OS=Mus musculus GN=Uba1 PE=2 SV=1;sp|Q02053|UBA1_MOUSE Ubiquitin-like modifier-activating enzyme 1 OS=Mus musculus GN=Uba1 PE=1 SV=1	55487000000	49444000000	60759000000	2856700000	956670000	852490000	1047600000	58834000000	60403000000	61580000000	54	54	43	71.7	71.7	61.3	117.81	0	323.31	165690000000	587	189	192	206	51	50	50	51	50	50	41	39	39
747	E9Q784;B9EHN9;Q8CIK5;Q9CXN5;Q9CT50	E9Q784;B9EHN9;Q8CIK5		Zc3h13	tr|E9Q784|E9Q784_MOUSE Protein Zc3h13 OS=Mus musculus GN=Zc3h13 PE=1 SV=1;tr|B9EHN9|B9EHN9_MOUSE Zinc finger CCCH type containing 13 OS=Mus musculus GN=Zc3h13 PE=2 SV=1;tr|Q8CIK5|Q8CIK5_MOUSE Zc3h13 protein (Fragment) OS=Mus musculus GN=Zc3h13 PE=2 SV=1	218950000	137930000	225410000	7278700	2736900	1724100	2817600	207450000	243330000	225010000	7	7	7	5.1	5.1	5.1	203.75	0	16.051	582290000	16	6	5	5	6	5	6	6	5	6	6	5	6
748	B9EHV2;E9Q3I3	B9EHV2;E9Q3I3		Spata13	tr|B9EHV2|B9EHV2_MOUSE Spata13 protein OS=Mus musculus GN=Spata13 PE=2 SV=1;tr|E9Q3I3|E9Q3I3_MOUSE Spermatogenesis-associated protein 13 OS=Mus musculus GN=Spata13 PE=1 SV=1	156530000	113770000	146560000	7313300	2746100	1995900	2571300	157060000	152290000	144860000	2	2	2	2.5	2.5	2.5	128.1	0	4.0566	416860000	6	2	2	2	2	1	1	2	1	1	2	1	1
749	B9EHX4;Q62388;Q6NX74;F6UXV2;Q3UT15;D3Z0Q2	B9EHX4;Q62388	Serine-protein kinase ATM	Atm	tr|B9EHX4|B9EHX4_MOUSE Ataxia telangiectasia mutated homolog (Human) OS=Mus musculus GN=Atm PE=2 SV=1;sp|Q62388|ATM_MOUSE Serine-protein kinase ATM OS=Mus musculus GN=Atm PE=1 SV=2	933850000	593050000	619640000	11298000	4915000	3121300	3261300	852210000	955530000	782300000	47	47	47	19.8	19.8	19.8	349.07	0	74.404	2146500000	93	31	30	32	28	29	31	28	29	31	28	29	31
750	B9EHY2;Q80W54;I7HIP5	B9EHY2;Q80W54	CAAX prenyl protease 1 homolog	Zmpste24	tr|B9EHY2|B9EHY2_MOUSE Zinc metallopeptidase, STE24 homolog (S. cerevisiae) OS=Mus musculus GN=Zmpste24 PE=2 SV=1;sp|Q80W54|FACE1_MOUSE CAAX prenyl protease 1 homolog OS=Mus musculus GN=Zmpste24 PE=1 SV=2	2182900000	2186900000	1907200000	298900000	103950000	104140000	90819000	2636600000	2147400000	2437000000	15	15	15	32.4	32.4	32.4	54.734	0	46.95	6277000000	80	25	30	25	12	13	13	12	13	13	12	13	13
751	B9EHZ5;Q9JLB0-2;Q3UN60;Q9JLB0;Q6NSS8;Q811G2;Q3TPA2;E9PWC5;Q8BP37	B9EHZ5;Q9JLB0-2;Q3UN60;Q9JLB0;Q6NSS8;Q811G2	MAGUK p55 subfamily member 6	Mpp6	tr|B9EHZ5|B9EHZ5_MOUSE Membrane protein, palmitoylated 6 (MAGUK p55 subfamily member 6) OS=Mus musculus GN=Mpp6 PE=2 SV=1;sp|Q9JLB0-2|MPP6_MOUSE Isoform Alpha of MAGUK p55 subfamily member 6 OS=Mus musculus GN=Mpp6;tr|Q3UN60|Q3UN60_MOUSE Membrane protein,	431640000	332180000	555870000	34729000	11359000	8741700	14628000	507520000	477230000	543730000	13	13	13	31.5	31.5	31.5	60.924	0	18.192	1319700000	29	11	9	9	8	9	8	8	9	8	8	9	8
752	B9EI21;O54836	B9EI21;O54836	Zinc finger matrin-type protein 3	Zmat3	tr|B9EI21|B9EI21_MOUSE Zinc finger matrin type 3 OS=Mus musculus GN=Zmat3 PE=2 SV=1;sp|O54836|ZMAT3_MOUSE Zinc finger matrin-type protein 3 OS=Mus musculus GN=Zmat3 PE=2 SV=1	0	77908000	123540000	12590000	0	4869300	7721200	0	112820000	148200000	2	2	2	13.1	13.1	13.1	32.05	0.00032457	2.8687	201450000	3	0	1	2	0	1	2	0	1	2	0	1	2
753	B9EI57;Q8CH25-2;Q8CH25;Q9CS69	B9EI57;Q8CH25-2;Q8CH25	SAFB-like transcription modulator	Sltm	tr|B9EI57|B9EI57_MOUSE SAFB-like, transcription modulator OS=Mus musculus GN=Sltm PE=2 SV=1;sp|Q8CH25-2|SLTM_MOUSE Isoform 2 of SAFB-like transcription modulator OS=Mus musculus GN=Sltm;sp|Q8CH25|SLTM_MOUSE SAFB-like transcription modulator OS=Mus musculus	1605500000	1415700000	1292500000	84581000	31480000	27758000	25342000	1642700000	2024700000	1710300000	22	22	22	23.4	23.4	23.4	116.92	0	81.767	4313600000	77	27	22	28	16	18	15	16	18	15	16	18	15
754	B9EIE8;Q9DA03;D6RD13	B9EIE8;Q9DA03	Complex III assembly factor LYRM7	Lyrm7	tr|B9EIE8|B9EIE8_MOUSE LYR motif containing 7 OS=Mus musculus GN=Lyrm7 PE=2 SV=1;sp|Q9DA03|LYRM7_MOUSE Complex III assembly factor LYRM7 OS=Mus musculus GN=Lyrm7 PE=2 SV=2	576330000	295700000	401680000	181960000	82333000	42243000	57383000	519840000	505380000	675820000	4	4	4	39.1	39.1	39.1	14.85	0	21.883	1273700000	18	5	6	7	4	4	4	4	4	4	4	4	4
755	B9EIE9;P46664;Q8C909	B9EIE9;P46664	Adenylosuccinate synthetase isozyme 2	Adss	tr|B9EIE9|B9EIE9_MOUSE Adenylosuccinate synthetase isozyme 2 OS=Mus musculus GN=Adss PE=2 SV=1;sp|P46664|PURA2_MOUSE Adenylosuccinate synthetase isozyme 2 OS=Mus musculus GN=Adss PE=1 SV=2	7137100000	6160200000	7129400000	785650000	274510000	236930000	274210000	8678400000	7721600000	8417000000	23	23	21	57.7	57.7	53.3	50.02	0	159.54	20427000000	154	50	55	49	19	21	21	19	21	21	17	19	19
756	D3YUW8;D3YUX1;Q3TSQ2;Q0VGT3;B9EIG6;Q8BZH4;F7D0L1	D3YUW8;D3YUX1;Q3TSQ2;Q0VGT3;B9EIG6;Q8BZH4	Pogo transposable element with ZNF domain	Pogz	tr|D3YUW8|D3YUW8_MOUSE Pogo transposable element with ZNF domain OS=Mus musculus GN=Pogz PE=4 SV=1;tr|D3YUX1|D3YUX1_MOUSE Pogo transposable element with ZNF domain OS=Mus musculus GN=Pogz PE=4 SV=1;tr|Q3TSQ2|Q3TSQ2_MOUSE Putative uncharacterized protein OS	1216400000	841390000	804400000	42092000	17889000	12373000	11829000	1169000000	1065900000	1194000000	22	22	22	28.9	28.9	28.9	144.86	0	67.207	2862200000	69	24	27	18	19	17	15	19	17	15	19	17	15
757	B9EIT8;Q8C1Z8;E0CZ56	B9EIT8;Q8C1Z8	tRNA methyltransferase 10 homolog A	Trmt10a	tr|B9EIT8|B9EIT8_MOUSE Rg9mtd2 protein OS=Mus musculus GN=Trmt10a PE=2 SV=1;sp|Q8C1Z8|TM10A_MOUSE tRNA methyltransferase 10 homolog A OS=Mus musculus GN=Trmt10a PE=2 SV=2	74742000	38749000	35857000	7467400	3737100	1937500	1792900	0	44190000	35369000	3	3	3	13.7	13.7	13.7	37.992	0	4.7213	149350000	4	2	1	1	2	1	1	2	1	1	2	1	1
758	B9EIU3;Q9WU60;Q8CHF0	B9EIU3;Q9WU60;Q8CHF0	Attractin	Atrn	tr|B9EIU3|B9EIU3_MOUSE Attractin OS=Mus musculus GN=Atrn PE=2 SV=1;sp|Q9WU60|ATRN_MOUSE Attractin OS=Mus musculus GN=Atrn PE=2 SV=3;tr|Q8CHF0|Q8CHF0_MOUSE MKIAA0548 protein (Fragment) OS=Mus musculus GN=Atrn PE=2 SV=1	353250000	125130000	68932000	7818700	5046400	1787600	984740	292130000	196960000	126090000	8	8	8	7.4	7.4	7.4	158.04	0	12.319	547310000	17	8	6	3	6	6	2	6	6	2	6	6	2
759	Q3UP03;E9Q9C7;E9Q9C4;E9Q9C0;B9EIV0;E9Q9C1;E9Q9C2;E9QK41;Q8K4G5-4;Q8K4G5-2;Q8K4G5;E9Q9Q7;Q3TAG5;E9Q9D1;E9Q9D2;E9Q030;Q8K4G5-3;Q9EPW6;F6YHE5;Q8K278;Q8K4G5-5	Q3UP03;E9Q9C7;E9Q9C4;E9Q9C0;B9EIV0;E9Q9C1;E9Q9C2;E9QK41;Q8K4G5-4;Q8K4G5-2;Q8K4G5;E9Q9Q7;Q3TAG5;E9Q9D1;E9Q9D2;E9Q030;Q8K4G5-3	Actin-binding LIM protein 1	Ablim1	tr|Q3UP03|Q3UP03_MOUSE Putative uncharacterized protein (Fragment) OS=Mus musculus GN=Ablim1 PE=2 SV=1;tr|E9Q9C7|E9Q9C7_MOUSE Actin-binding LIM protein 1 OS=Mus musculus GN=Ablim1 PE=1 SV=1;tr|E9Q9C4|E9Q9C4_MOUSE Actin-binding LIM protein 1 OS=Mus musculus	0	57959000	38062000	2043000	0	1233200	809840	0	87369000	22556000	3	3	3	6.2	6.2	6.2	74.087	0.00016906	3.5158	96021000	3	0	1	2	0	1	3	0	1	3	0	1	3
760	B9EIV8;Q9WVL3;Q9WVL3-2;Q8C6Y2;Q91V14-2;Q91V14	B9EIV8;Q9WVL3;Q9WVL3-2	Solute carrier family 12 member 7	Slc12a7	tr|B9EIV8|B9EIV8_MOUSE Solute carrier family 12, member 7 OS=Mus musculus GN=Slc12a7 PE=2 SV=1;sp|Q9WVL3|S12A7_MOUSE Solute carrier family 12 member 7 OS=Mus musculus GN=Slc12a7 PE=1 SV=1;sp|Q9WVL3-2|S12A7_MOUSE Isoform 2 of Solute carrier family 12 member	335300000	211430000	385230000	18274000	6574500	4145700	7553600	338830000	386520000	367900000	11	10	10	15.1	14.4	14.4	119.48	0	19.523	931960000	19	8	6	5	8	6	6	7	5	6	7	5	6
761	B9EIX2;Q80U49-2;Q80U49	B9EIX2;Q80U49-2;Q80U49	Centrosomal protein of 170 kDa protein B	Cep170b	tr|B9EIX2|B9EIX2_MOUSE AW555464 protein OS=Mus musculus GN=Cep170b PE=2 SV=1;sp|Q80U49-2|C170B_MOUSE Isoform 2 of Centrosomal protein of 170 kDa protein B OS=Mus musculus GN=Cep170b;sp|Q80U49|C170B_MOUSE Centrosomal protein of 170 kDa protein B OS=Mus musc	0	20367000	0	199670	0	199670	0	0	22552000	0	2	1	1	1.6	0.7	0.7	166.86	1	-2	20367000	0	0	0	0	1	2	1	0	1	0	0	1	0
762	Q3UPV7;B9EIY4;Q9R166;Q0VDL4	Q3UPV7;B9EIY4;Q9R166;Q0VDL4		Zfp953;Zfp109	tr|Q3UPV7|Q3UPV7_MOUSE Protein Zfp953 OS=Mus musculus GN=Zfp953 PE=2 SV=1;tr|B9EIY4|B9EIY4_MOUSE E130120F12Rik protein OS=Mus musculus GN=Zfp953 PE=2 SV=1;tr|Q9R166|Q9R166_MOUSE Protein Zfp109 OS=Mus musculus GN=Zfp109 PE=2 SV=1;tr|Q0VDL4|Q0VDL4_MOUSE Zfp1	14978000	7892300	8229700	1413600	680820	358740	374080	16785000	13861000	11577000	1	1	1	3.3	3.3	3.3	35.362	0.0068374	1.3282	31100000	7	3	2	2	1	1	1	1	1	1	1	1	1
763	B9EJ29;Q80UG2	B9EJ29;Q80UG2	Plexin-A4	Plxna4	tr|B9EJ29|B9EJ29_MOUSE Plexin A4 OS=Mus musculus GN=Plxna4 PE=2 SV=1;sp|Q80UG2|PLXA4_MOUSE Plexin-A4 OS=Mus musculus GN=Plxna4 PE=1 SV=3	0	0	13817000	125610	0	0	125610	0	0	22995000	3	2	2	2.2	1.6	1.6	212.23	0.0058497	1.4087	13817000	2	0	0	2	0	1	2	0	0	2	0	0	2
764	B9EJ54;Q6ZQG1;Q6PDG0;Q6P9L5;Q6P9Y6;E9Q880;Q9D6C1;Q3UFI7;Q80VE6;B0LAE1	B9EJ54;Q6ZQG1;Q6PDG0;Q6P9L5		Nup205	tr|B9EJ54|B9EJ54_MOUSE MCG21756, isoform CRA_b OS=Mus musculus GN=Nup205 PE=2 SV=1;tr|Q6ZQG1|Q6ZQG1_MOUSE MCG21756, isoform CRA_a (Fragment) OS=Mus musculus GN=Nup205 PE=2 SV=1;tr|Q6PDG0|Q6PDG0_MOUSE Nup205 protein (Fragment) OS=Mus musculus GN=Nup205 PE=2	6956200000	6090300000	7489300000	181730000	61559000	53897000	66277000	8254400000	7980800000	8122500000	66	66	66	41.4	41.4	41.4	227.46	0	252.45	20536000000	274	95	85	94	50	54	56	50	54	56	50	54	56
765	B9EJ72;Q9WTS5	B9EJ72;Q9WTS5	Teneurin-2;Ten-2, soluble form;Ten-2 intracellular domain	Tenm2	tr|B9EJ72|B9EJ72_MOUSE Odz2 protein OS=Mus musculus GN=Tenm2 PE=2 SV=1;sp|Q9WTS5|TEN2_MOUSE Teneurin-2 OS=Mus musculus GN=Tenm2 PE=2 SV=1	51641000	0	0	366250	366250	0	0	63254000	0	0	2	1	1	1.4	0.8	0.8	303.34	1	-2	51641000	1	1	0	0	2	1	1	1	0	0	1	0	0
766	E9QAF9;B9EJ77;Q0VGY8;Q8CHA0;Q0VGY8-2;Q80YQ9	E9QAF9;B9EJ77;Q0VGY8;Q8CHA0	Protein TANC1	Tanc1	tr|E9QAF9|E9QAF9_MOUSE Protein TANC1 OS=Mus musculus GN=Tanc1 PE=4 SV=1;tr|B9EJ77|B9EJ77_MOUSE Tanc1 protein OS=Mus musculus GN=Tanc1 PE=2 SV=1;sp|Q0VGY8|TANC1_MOUSE Protein TANC1 OS=Mus musculus GN=Tanc1 PE=2 SV=2;tr|Q8CHA0|Q8CHA0_MOUSE MKIAA1728 protein	805810000	696930000	707120000	19556000	7131100	6167500	6257700	886500000	894970000	806830000	25	25	25	19.8	19.8	19.8	200.06	0	61.938	2209900000	68	24	24	20	18	19	18	18	19	18	18	19	18
767	Q3UMB1;B9EJ80	Q3UMB1;B9EJ80		Pdzd8	tr|Q3UMB1|Q3UMB1_MOUSE Putative uncharacterized protein OS=Mus musculus GN=Pdzd8 PE=2 SV=1;tr|B9EJ80|B9EJ80_MOUSE PDZ domain containing 8 OS=Mus musculus GN=Pdzd8 PE=1 SV=1	1991900000	1716800000	1988000000	87641000	30645000	26412000	30584000	2347900000	2216400000	2252700000	35	35	35	38.4	38.4	38.4	127.77	0	111	5696600000	112	42	34	36	32	26	28	32	26	28	32	26	28
768	B9EJ86;G3X9N6;Q69ZJ4	B9EJ86;G3X9N6	Oxysterol-binding protein	Osbpl8	tr|B9EJ86|B9EJ86_MOUSE Oxysterol-binding protein OS=Mus musculus GN=Osbpl8 PE=1 SV=1;tr|G3X9N6|G3X9N6_MOUSE Oxysterol-binding protein OS=Mus musculus GN=Osbpl8 PE=1 SV=1	621830000	552410000	910850000	36580000	10909000	9691300	15980000	773260000	847300000	870750000	13	13	12	20.9	20.9	19.6	101.27	0	43.148	2085100000	38	14	9	15	10	7	11	10	7	11	9	6	10
769	B9EJR4;O35387;Q8R5I5;Q3UXX9	B9EJR4;O35387;Q8R5I5	HCLS1-associated protein X-1	Hax1	tr|B9EJR4|B9EJR4_MOUSE HCLS1 associated X-1 OS=Mus musculus GN=Hax1 PE=2 SV=1;sp|O35387|HAX1_MOUSE HCLS1-associated protein X-1 OS=Mus musculus GN=Hax1 PE=1 SV=1;tr|Q8R5I5|Q8R5I5_MOUSE HAX1XS OS=Mus musculus GN=Hax1 PE=2 SV=1	112390000	90971000	164640000	20445000	6243800	5054000	9146700	156790000	139400000	167950000	5	5	5	32.5	32.5	32.5	31.654	0	17.591	368000000	17	5	6	6	4	5	5	4	5	5	4	5	5
770	B9EJR8;B2RY24	B9EJR8	Dynein assembly factor 5, axonemal	Dnaaf5	tr|B9EJR8|B9EJR8_MOUSE HEAT repeat containing 2 OS=Mus musculus GN=Heatr2 PE=2 SV=1	130090000	55474000	116740000	5927600	2550900	1087700	2289100	108670000	108780000	140910000	9	9	9	15.9	15.9	15.9	93.85	0	21.339	302310000	14	5	3	6	6	3	5	6	3	5	6	3	5
[truncated: 6,417 more rows]
