# Supplementary material for: An efficient method for high-pH peptide fractionation based on C18 StageTips for in-depth proteome profiling
Source: Royal Society of Chemistry journal article supplement (doi:10.1039/c9ay01269a), 2019-01-01
Supplement: c9ay01269a6.xlsx [file c9ay01269a6.xlsx]

## Sheet: supplementary_table_S4
Supplementary Table S4. List of identified protein groups in experiment 2 of triplicate analysis. This list includes the Uniprot accession nubmer, official gene symbol, and protein name of the identified protein groups. Searh results from Maxquant are also described.
No.	Protein IDs	Majority protein IDs	Protein names	Gene names	Fasta headers	Intensity P2_E1	Intensity P2_E2	Intensity P2_E3	iBAQ	iBAQ P2_E1	iBAQ P2_E2	iBAQ P2_E3	LFQ intensity P2_E1	LFQ intensity P2_E2	LFQ intensity P2_E3	Peptides	Razor + unique peptides	Unique peptides	Sequence coverage [%]	Unique + razor sequence coverage [%]	Unique sequence coverage [%]	Mol. weight [kDa]	Q-value	Score	Intensity	MS/MS count	Peptides P2_E1	Peptides P2_E2	Peptides P2_E3	Razor + unique peptides P2_E1	Razor + unique peptides P2_E2	Razor + unique peptides P2_E3	Unique peptides P2_E1	Unique peptides P2_E2	Unique peptides P2_E3	MS/MS count P2_E1	MS/MS count P2_E2	MS/MS count P2_E3
1	Q3V2T7;Q5VI45;Q9TET3;C4PAV8;B0LAD5;E3VQ38;G9B4I2;G9B4I1;G9B4H2;G9B4G5;G9B4G3;A0A023UL25;H8Y1I5;A0A023NE65;A0A023NCS0;A0A023NE78;A0A023NDP5;A0A023ND59;A0A023NDQ1;A0A023NCR8;A0A023NDP0;B3Y998;A8DUU6;Q36290;L0L4R1;L0L4K0;L0L1W8;V9TRK2;V9TQ89;V9TP30;V9TP20;V9TN76;A8DUS7;A8DUR3;W0SMJ3;W0SLU4;U6C8B8;U6C8B6;U6C7E5;U6C7D9;U6C6V9;U6C6V7;Q9TDS6;B1P8W3;R9TNV1;Q7JCZ3;Q71EK3;Q71EK1;Q71EJ7;Q3V2F9;G3EBA2;A3R3Q8…	Q3V2T7;Q5VI45;Q9TET3;C4PAV8;B0LAD5;E3VQ38;G9B4I2;G9B4I1;G9B4H2;G9B4G5;G9B4G3;A0A023UL25;H8Y1I5;A0A023NE65;A0A023NCS0;A0A023NE78;A0A023NDP5;A0A023ND59;A0A023NDQ1;A0A023NCR8;A0A023NDP0;B3Y998;A8DUU6;Q36290;L0L4R1;L0L4K0;L0L1W8;V9TRK2;V9TQ89;V9TP30;V9TP20;V9TN76;A8DUS7;A8DUR3;W0SMJ3;W0SLU4;U6C8B8;U6C8B6;U6C7E5;U6C7D9;U6C6V9;U6C6V7;Q9TDS6;B1P8W3;R9TNV1;Q7JCZ3;Q71EK3;Q71EK1;Q71EJ7;Q3V2F9;G3EBA2;A3R3Q8…	Cytochrome b	mt-Cytb;cytb;Cytb;cytB;CYTB;Mt-Cyb	tr|Q3V2T7|Q3V2T7_MOUSE Cytochrome b (Fragment) OS=Mus musculus GN=mt-Cytb PE=2 SV=1;tr|Q5VI45|Q5VI45_MOUSE Cytochrome b (Fragment) OS=Mus musculus GN=cytb PE=4 SV=1;tr|Q9TET3|Q9TET3_MOUSE Cytochrome b (Fragment) OS=Mus musculus PE=4 SV=1;tr|C4PAV8|C4PAV8_M	29660000	34687000	53585000	39311000	9886700	11562000	17862000	58825000	99599000	104910000	1	1	1	9.6	9.6	9.6	10.669	0.0014674	2.1305	117930000	3	1	1	1	1	1	1	1	1	1	1	1	1
2	A0A023T672;Q9CWZ3-2;Q9CWZ3;Q9CT44	A0A023T672;Q9CWZ3-2;Q9CWZ3	RNA-binding protein 8A	RBM8;Rbm8a	tr|A0A023T672|A0A023T672_MOUSE RNA-binding protein 8A OS=Mus musculus GN=RBM8 PE=1 SV=1;sp|Q9CWZ3-2|RBM8A_MOUSE Isoform 2 of RNA-binding protein 8A OS=Mus musculus GN=Rbm8a;sp|Q9CWZ3|RBM8A_MOUSE RNA-binding protein 8A OS=Mus musculus GN=Rbm8a PE=1 SV=3	2025600000	1370100000	2285600000	710160000	253200000	171260000	285700000	2360600000	2172100000	2016800000	8	8	8	71.3	71.3	71.3	19.889	0	68.037	5681300000	32	8	7	6	8	7	6	8	7	6	11	12	9
3	A0A024QYR9;O08586;Q8BSR7;Q3UUN5;Q3UUT8	A0A024QYR9;O08586;Q8BSR7;Q3UUN5	Phosphatidylinositol 3,4,5-trisphosphate 3-phosphatase and dual-specificity protein phosphatase PTEN	Pten	tr|A0A024QYR9|A0A024QYR9_MOUSE Mitochondrial PTENalpha OS=Mus musculus GN=PTEN PE=2 SV=1;sp|O08586|PTEN_MOUSE Phosphatidylinositol 3,4,5-trisphosphate 3-phosphatase and dual-specificity protein phosphatase PTEN OS=Mus musculus GN=Pten PE=1 SV=1;tr|Q8BSR7|Q	205270000	236220000	374080000	22655000	5702100	6561700	10391000	385350000	347510000	416370000	9	9	9	17.5	17.5	17.5	64.566	0	15.389	815570000	19	5	6	8	5	6	8	5	6	8	5	6	8
4	A0A067XG52;Q99K51;Q3UKB1;Q3UJG9;B1AX58;Q3U9M7;Q3U6Z1;Q3TJX0;Q61233;Q3U6N7	A0A067XG52;Q99K51;Q3UKB1;Q3UJG9;B1AX58	Plastin-3	Pls3	tr|A0A067XG52|A0A067XG52_MOUSE Plastin-3 (Fragment) OS=Mus musculus GN=Pls3 PE=4 SV=1;sp|Q99K51|PLST_MOUSE Plastin-3 OS=Mus musculus GN=Pls3 PE=1 SV=3;tr|Q3UKB1|Q3UKB1_MOUSE Putative uncharacterized protein OS=Mus musculus GN=Pls3 PE=2 SV=1;tr|Q3UJG9|Q3UJG	29570000000	27228000000	24555000000	2033800000	739260000	680710000	613880000	39426000000	41001000000	37807000000	39	39	36	65.3	65.3	59.8	70.642	0	323.31	81354000000	249	34	38	39	34	38	39	31	35	36	77	85	87
5	A0A067XG53;B7ZP42;O70589-3;O70589-4;O70589-5;O70589;B9EJ23;O70589-2;F6ZQR2;Q91VJ0;F6Y9I5;B1AUH5;Q3TNZ0;B1AUH6;F7CD87	A0A067XG53;B7ZP42;O70589-3;O70589-4;O70589-5;O70589;B9EJ23;O70589-2	Peripheral plasma membrane protein CASK	Cask	tr|A0A067XG53|A0A067XG53_MOUSE Peripheral plasma membrane protein CASK (Fragment) OS=Mus musculus GN=Cask PE=4 SV=1;tr|B7ZP42|B7ZP42_MOUSE Cask protein OS=Mus musculus GN=Cask PE=2 SV=1;sp|O70589-3|CSKP_MOUSE Isoform 3 of Peripheral plasma membrane protein	2226700000	2123400000	2330800000	133620000	44534000	42467000	46617000	3576800000	3303800000	3025900000	20	20	20	30.3	30.3	30.3	99.226	0	37.093	6680900000	62	15	14	17	15	14	17	15	14	17	20	20	22
6	A0A068BD34;Q61193;G3UZ21	A0A068BD34;Q61193	Ral guanine nucleotide dissociation stimulator-like 2	Rgl2	tr|A0A068BD34|A0A068BD34_MOUSE Ral guanine nucleotide dissociation stimulator-like 2 OS=Mus musculus GN=Rgl2 PE=2 SV=1;sp|Q61193|RGL2_MOUSE Ral guanine nucleotide dissociation stimulator-like 2 OS=Mus musculus GN=Rgl2 PE=1 SV=2	124930000	43947000	29596000	5089100	3203400	1126900	758880	150840000	106420000	50752000	6	6	6	12.2	12.2	12.2	83.825	0	17.997	198480000	9	5	3	2	5	3	2	5	3	2	5	2	2
7	Q8VCR0;G3UXP8;A0A068BES4;A0A068BIV0;A0A068BFV6;A0A068BD65;A0A068BGV8;Q3TWJ1;A0A068BGT5;P28704-2;P28704;G3UZ09;E9Q9V9;P28705	Q8VCR0;G3UXP8;A0A068BES4;A0A068BIV0;A0A068BFV6;A0A068BD65;A0A068BGV8;Q3TWJ1;A0A068BGT5;P28704-2;P28704	Retinoic acid receptor RXR-beta	Rxrb	tr|Q8VCR0|Q8VCR0_MOUSE Retinoic acid receptor RXR-beta OS=Mus musculus GN=Rxrb PE=2 SV=1;tr|G3UXP8|G3UXP8_MOUSE Retinoic acid receptor RXR-beta (Fragment) OS=Mus musculus GN=Rxrb PE=3 SV=1;tr|A0A068BES4|A0A068BES4_MOUSE Putative retinoid X receptor beta is	80690000	63011000	54109000	8600400	3508200	2739600	2352600	172460000	153110000	104240000	4	4	2	11.8	11.8	6	44.839	0	5.3038	197810000	8	3	3	3	3	3	3	1	1	2	3	2	3
8	Q5XLB0;Q5XW54;Q5XW59;G3UX50;Q5XW53;Q3U0Z3;A1A558;A0A068BEP5;Q3UKR0;Q3UIV3;O35613;Q5XW58;Q5XW57;G3UWI4	Q5XLB0;Q5XW54;Q5XW59;G3UX50;Q5XW53;Q3U0Z3;A1A558;A0A068BEP5;Q3UKR0;Q3UIV3;O35613	Death domain-associated protein 6	Daxx	tr|Q5XLB0|Q5XLB0_MOUSE Death domain-associated protein (Fragment) OS=Mus musculus GN=Daxx PE=2 SV=1;tr|Q5XW54|Q5XW54_MOUSE Death domain-associated protein (Fragment) OS=Mus musculus GN=Daxx PE=2 SV=1;tr|Q5XW59|Q5XW59_MOUSE Death-domain associated protein (	199200000	148020000	161640000	31804000	12450000	9251000	10103000	262460000	360310000	260080000	5	5	5	23.4	23.4	23.4	36.271	0	12.82	508860000	14	4	4	4	4	4	4	4	4	4	5	4	5
9	Q78ZJ8;A0A068BFR3;P46638;G3UY29;E9Q3P9;F8WGS1;G3UZD3;Q3UZ37;G3UZL4;Q9QWU0	Q78ZJ8;A0A068BFR3;P46638;G3UY29;E9Q3P9;F8WGS1;G3UZD3;Q3UZ37	Ras-related protein Rab-11B	Rab11b;Rab11a	tr|Q78ZJ8|Q78ZJ8_MOUSE MCG22989, isoform CRA_b OS=Mus musculus GN=Rab11b PE=2 SV=1;tr|A0A068BFR3|A0A068BFR3_MOUSE RAS oncogene family protein OS=Mus musculus GN=Rab11b PE=2 SV=1;sp|P46638|RB11B_MOUSE Ras-related protein Rab-11B OS=Mus musculus GN=Rab11b PE	10683000000	10995000000	7991800000	1854300000	667690000	687170000	499490000	13346000000	13918000000	14447000000	11	11	2	54.1	54.1	13.3	24.489	0	104.23	29670000000	71	11	11	11	11	11	11	2	2	2	24	23	24
10	A0A068BFR6;Q9QWT9;Q9QWT9-2;Q9QWT9-3;G3UXN2;Q810Z7;G3UX22	A0A068BFR6;Q9QWT9;Q9QWT9-2;Q9QWT9-3	Kinesin-like protein;Kinesin-like protein KIFC1	Kifc1	tr|A0A068BFR6|A0A068BFR6_MOUSE Kinesin family member C1 OS=Mus musculus GN=Kifc1 PE=2 SV=1;sp|Q9QWT9|KIFC1_MOUSE Kinesin-like protein KIFC1 OS=Mus musculus GN=Kifc1 PE=1 SV=2;sp|Q9QWT9-2|KIFC1_MOUSE Isoform 2 of Kinesin-like protein KIFC1 OS=Mus musculus G	424260000	233370000	245310000	20999000	9866600	5427200	5704900	575650000	564720000	621550000	23	4	4	44.5	8.2	8.2	74.11	0	18.051	902950000	15	16	17	18	3	2	3	3	2	3	5	5	5
11	A0A068BFS4;O35730-2;O35730;O35730-3	A0A068BFS4;O35730-2;O35730;O35730-3	E3 ubiquitin-protein ligase RING1	Ring1	tr|A0A068BFS4|A0A068BFS4_MOUSE Ring finger protein 1 OS=Mus musculus GN=Ring1 PE=2 SV=1;sp|O35730-2|RING1_MOUSE Isoform 2 of E3 ubiquitin-protein ligase RING1 OS=Mus musculus GN=Ring1;sp|O35730|RING1_MOUSE E3 ubiquitin-protein ligase RING1 OS=Mus musculus	105430000	88935000	51336000	13650000	5857300	4940800	2852000	101430000	104670000	91703000	4	2	2	17	9.6	9.6	42.612	0	6.6348	245700000	7	4	4	4	2	2	2	2	2	2	3	2	2
12	Q3V3A4;A0A068BGT0;Q8C754;G3UY33	Q3V3A4;A0A068BGT0;Q8C754;G3UY33	Vacuolar protein sorting-associated protein 52 homolog	Vps52	tr|Q3V3A4|Q3V3A4_MOUSE Putative uncharacterized protein OS=Mus musculus GN=Vps52 PE=2 SV=1;tr|A0A068BGT0|A0A068BGT0_MOUSE Vacuolar protein sorting 52 OS=Mus musculus GN=Vps52 PE=2 SV=1;sp|Q8C754|VPS52_MOUSE Vacuolar protein sorting-associated protein 52 ho	285910000	273490000	430520000	22498000	6498100	6215700	9784600	558630000	629260000	573570000	15	15	4	30.8	30.8	11.6	82.099	0	64.712	989930000	29	10	9	9	10	9	9	3	3	3	10	8	11
13	Q3UA79;Q80WF7;Q792S7;Q3TXM1;Q61230;Q61229;Q61228;Q61227;A0A068BGU5;P36371	Q3UA79;Q80WF7;Q792S7;Q3TXM1;Q61230;Q61229;Q61228;Q61227;A0A068BGU5;P36371	Antigen peptide transporter 2	Tap2	tr|Q3UA79|Q3UA79_MOUSE Putative uncharacterized protein OS=Mus musculus GN=Tap2 PE=2 SV=1;tr|Q80WF7|Q80WF7_MOUSE Tap2 protein OS=Mus musculus GN=Tap2 PE=2 SV=2;tr|Q792S7|Q792S7_MOUSE Antigen processing transporter TAP2 OS=Mus musculus GN=Tap2 PE=3 SV=1;tr|	11752000	19381000	6652000	1079600	335760	553740	190060	25272000	29049000	18646000	3	3	3	6.8	6.8	6.8	77.313	0	5.6638	37784000	4	1	3	1	1	3	1	1	3	1	1	2	1
14	Q14C53;A0A068BIT0;Q31125	Q14C53;A0A068BIT0;Q31125	Zinc transporter SLC39A7	Slc39a7	tr|Q14C53|Q14C53_MOUSE Solute carrier family 39 (Zinc transporter), member 7 OS=Mus musculus GN=Slc39a7 PE=2 SV=1;tr|A0A068BIT0|A0A068BIT0_MOUSE Solute carrier family 39 OS=Mus musculus GN=Slc39a7 PE=2 SV=1;sp|Q31125|S39A7_MOUSE Zinc transporter SLC39A7 OS	544250000	338810000	631260000	100960000	36283000	22588000	42084000	549430000	490930000	523660000	2	2	2	7.1	7.1	7.1	50.686	0	19.206	1514300000	7	1	1	2	1	1	2	1	1	2	2	2	3
15	Q61919;Q60589;Q2HJ08;Q1KYM0;A0A068EVR8;Q04586;P70356;Q61920;Q9R0Y9;E3T928;Q3U4K5;Q62102;Q3UZF4;B2RQY6;Q8K030;Q61975;Q3TZL0	Q61919;Q60589;Q2HJ08;Q1KYM0;A0A068EVR8;Q04586;P70356;Q61920		env;Mela	tr|Q61919|Q61919_MOUSE Envelope protein OS=Mus musculus PE=4 SV=1;tr|Q60589|Q60589_MOUSE Envelope glycoprotein OS=Mus musculus GN=env PE=4 SV=1;tr|Q2HJ08|Q2HJ08_MOUSE Melanoma antigen OS=Mus musculus GN=Mela PE=2 SV=1;tr|Q1KYM0|Q1KYM0_MOUSE Env polyprotein	133150000000	113300000000	124740000000	13257000000	4755500000	4046500000	4454900000	209800000000	211000000000	216430000000	26	26	16	38.3	38.3	25.3	73.625	0	323.31	371190000000	559	23	22	23	23	22	23	14	13	14	184	181	194
16	A0A068EW80;Q60953;D3Z3A6;D3YXR5;Q60953-2;F7BTZ2;Q8BSJ6;D3Z2V0;O89066	A0A068EW80;Q60953;D3Z3A6;D3YXR5;Q60953-2;F7BTZ2	Protein PML	Pml	tr|A0A068EW80|A0A068EW80_MOUSE Promyelocytic leukemia OS=Mus musculus GN=Pml PE=2 SV=1;sp|Q60953|PML_MOUSE Protein PML OS=Mus musculus GN=Pml PE=1 SV=3;tr|D3Z3A6|D3Z3A6_MOUSE Protein PML OS=Mus musculus GN=Pml PE=1 SV=1;tr|D3YXR5|D3YXR5_MOUSE Protein PML O	1450900000	1566000000	1297400000	91795000	30871000	33319000	27605000	2312100000	2414000000	2225200000	19	19	19	33.9	33.9	33.9	98.241	0	59.512	4314400000	61	14	15	13	14	15	13	14	15	13	19	23	19
17	A0A068F126;Q6YIY0	A0A068F126;Q6YIY0			tr|A0A068F126|A0A068F126_MOUSE Glyco-gag polyprotein OS=Mus musculus PE=4 SV=1;tr|Q6YIY0|Q6YIY0_MOUSE Gag protein OS=Mus musculus PE=2 SV=1	12431000000	15536000000	14988000000	1534100000	443960000	554870000	535290000	21269000000	23308000000	22196000000	31	8	6	61.4	15	13	70.068	0	89.198	42955000000	83	26	29	30	8	8	8	6	6	6	28	30	25
18	A0A075B5M6;P04943;P04942;P04940	A0A075B5M6;P04943;P04942;P04940	Ig kappa chain V-VI region NQ6-8.3.1;Ig kappa chain V-VI region NQ5-61.1.2;Ig kappa chain V-VI region NQ2-17.4.1	Igkv4-56	tr|A0A075B5M6|A0A075B5M6_MOUSE Uncharacterized protein OS=Mus musculus PE=4 SV=1;sp|P04943|KV6A9_MOUSE Ig kappa chain V-VI region NQ6-8.3.1 OS=Mus musculus PE=2 SV=1;sp|P04942|KV6A8_MOUSE Ig kappa chain V-VI region NQ5-61.1.2 OS=Mus musculus PE=2 SV=1;sp|P	0	49320000	0	12330000	0	12330000	0	0	152430000	0	1	1	1	18.9	18.9	18.9	10.16	1	-2	49320000	1	0	1	0	0	1	0	0	1	0	0	1	0
19	Q811C8;A0A5E1;Q3UFA6;F8WH23;Q61581;E9Q5D9;Q3U131	Q811C8;A0A5E1;Q3UFA6;F8WH23;Q61581;E9Q5D9;Q3U131	Insulin-like growth factor-binding protein 7	Igfbp7	tr|Q811C8|Q811C8_MOUSE Igfbp7 protein (Fragment) OS=Mus musculus GN=Igfbp7 PE=2 SV=1;tr|A0A5E1|A0A5E1_MOUSE Insulin-like growth factor binding protein 7 OS=Mus musculus GN=Igfbp7 PE=2 SV=1;tr|Q3UFA6|Q3UFA6_MOUSE Putative uncharacterized protein OS=Mus musc	331590000	539600000	419390000	75917000	19506000	31741000	24670000	668840000	788310000	691210000	10	10	10	51.7	51.7	51.7	27.158	0	26.29	1290600000	30	8	8	7	8	8	7	8	8	7	8	11	11
20	A0AUN0;Q4G0C0;G3X928;Q6NZC7;Q3UY74	A0AUN0;Q4G0C0;G3X928;Q6NZC7	SEC23-interacting protein	Sec23ip	tr|A0AUN0|A0AUN0_MOUSE Sec23ip protein (Fragment) OS=Mus musculus GN=Sec23ip PE=2 SV=1;tr|Q4G0C0|Q4G0C0_MOUSE Sec23 interacting protein OS=Mus musculus GN=Sec23ip PE=2 SV=1;tr|G3X928|G3X928_MOUSE SEC23-interacting protein OS=Mus musculus GN=Sec23ip PE=4 SV	3882300000	4303200000	3577800000	245070000	80882000	89650000	74538000	4939700000	5666800000	5182100000	31	31	30	45	45	44.3	95.116	0	145.35	11763000000	111	25	26	25	25	26	25	25	25	24	35	39	37
21	A0AUV1;A3KPD0;B2RVF0;A2AB79;Q8CGP6;Q8CGP7;Q8CGP5;Q8BFU2;P22752;Q8CGP4;Q61668	A0AUV1;A3KPD0;B2RVF0;A2AB79;Q8CGP6;Q8CGP7;Q8CGP5;Q8BFU2;P22752;Q8CGP4	Histone H2A;Histone H2A type 1-H;Histone H2A type 1-K;Histone H2A type 1-F;Histone H2A type 3;Histone H2A type 1	Hist1h2ah;Hist1h2ad;Hist3h2a;Hist1h2ak;Hist1h2af;Hist1h2ab;Hist1h2aa	tr|A0AUV1|A0AUV1_MOUSE Histone H2A (Fragment) OS=Mus musculus GN=Hist1h2ah PE=2 SV=1;tr|A3KPD0|A3KPD0_MOUSE Histone H2A OS=Mus musculus GN=Hist1h2ah PE=2 SV=1;tr|B2RVF0|B2RVF0_MOUSE Histone H2A OS=Mus musculus GN=Hist1h2ad PE=2 SV=1;tr|A2AB79|A2AB79_MOUSE	60319000000	18934000000	32739000000	15999000000	8617000000	2704900000	4677000000	88618000000	61075000000	100550000000	9	9	2	64.6	64.6	5.5	13.819	0	92.166	111990000000	126	7	7	9	7	7	9	0	0	2	43	37	46
22	A0ELI5;Q8K2D3;D6RCX6;D3YYS4	A0ELI5;Q8K2D3	Enhancer of mRNA-decapping protein 3	Edc3	tr|A0ELI5|A0ELI5_MOUSE Putative uncharacterized protein OS=Mus musculus GN=Edc3 PE=4 SV=1;sp|Q8K2D3|EDC3_MOUSE Enhancer of mRNA-decapping protein 3 OS=Mus musculus GN=Edc3 PE=1 SV=1	470180000	397770000	368220000	39876000	15167000	12831000	11878000	799810000	763810000	790940000	14	14	14	40	40	40	55.957	0	40.99	1236200000	39	10	11	8	10	11	8	10	11	8	11	15	13
23	Q3UTU7;K4DI67;A0EQY3;Q6ZQK0;Q80W41	Q3UTU7;K4DI67;A0EQY3;Q6ZQK0;Q80W41	Condensin-2 complex subunit D3	Ncapd3	tr|Q3UTU7|Q3UTU7_MOUSE Putative uncharacterized protein OS=Mus musculus GN=Ncapd3 PE=2 SV=1;tr|K4DI67|K4DI67_MOUSE Condensin-2 complex subunit D3 OS=Mus musculus GN=Ncapd3 PE=4 SV=1;tr|A0EQY3|A0EQY3_MOUSE Jacobsen syndrome region 2 protein OS=Mus musculus	1075200000	684800000	556640000	29701000	13785000	8779500	7136400	1111900000	1536000000	1279200000	27	27	27	25.3	25.3	25.3	169.39	0	67.212	2316700000	63	22	14	16	22	14	16	22	14	16	27	18	18
24	A0JLQ7;Q8BFV2;Q8BNM3;E9Q1H5;E9Q5V9	A0JLQ7;Q8BFV2;Q8BNM3	PCI domain-containing protein 2	Pcid2	tr|A0JLQ7|A0JLQ7_MOUSE Pcid2 protein (Fragment) OS=Mus musculus GN=Pcid2 PE=2 SV=1;sp|Q8BFV2|PCID2_MOUSE PCI domain-containing protein 2 OS=Mus musculus GN=Pcid2 PE=2 SV=1;tr|Q8BNM3|Q8BNM3_MOUSE Putative uncharacterized protein OS=Mus musculus GN=Pcid2 PE=	749650000	759930000	683420000	73100000	24988000	25331000	22781000	1589800000	1208700000	1274500000	13	13	13	41.9	41.9	41.9	47.018	0	43.513	2193000000	38	10	10	8	10	10	8	10	10	8	15	13	10
25	B7ZND1;A0JLX6;Q9CTY5;F6WMX7	B7ZND1;A0JLX6;Q9CTY5;F6WMX7	Calcium uptake protein 3, mitochondrial	Micu3	tr|B7ZND1|B7ZND1_MOUSE Efha2 protein (Fragment) OS=Mus musculus GN=Micu3 PE=2 SV=1;tr|A0JLX6|A0JLX6_MOUSE Efha2 protein (Fragment) OS=Mus musculus GN=Micu3 PE=2 SV=1;sp|Q9CTY5|MICU3_MOUSE Calcium uptake protein 3, mitochondrial OS=Mus musculus GN=Micu3 PE=	7992600	0	9188300	780950	363300	0	417650	10695000	0	0	2	2	2	5.3	5.3	5.3	43.822	0.00060396	2.5247	17181000	2	1	0	1	1	0	1	1	0	1	1	0	1
26	A0JNY3;Q8BUV3	A0JNY3;Q8BUV3	Gephyrin;Molybdopterin adenylyltransferase;Molybdopterin molybdenumtransferase	Gphn	tr|A0JNY3|A0JNY3_MOUSE Gephyrin OS=Mus musculus GN=Gphn PE=1 SV=1;sp|Q8BUV3|GEPH_MOUSE Gephyrin OS=Mus musculus GN=Gphn PE=1 SV=2	1272800000	1084800000	1253200000	76826000	27081000	23080000	26665000	1961600000	1958300000	2192200000	16	16	16	30.4	30.4	30.4	83.665	0	81.223	3610800000	54	16	13	14	16	13	14	16	13	14	19	15	20
27	A0JNY7;G3XA17;Q62448;F7CBP1;Q62448-2;Q3U9U9;Q3URI0;F6TW20;F7CHS2;F7DAB1;F6UU81	A0JNY7;G3XA17;Q62448;F7CBP1;Q62448-2;Q3U9U9;Q3URI0	Eukaryotic translation initiation factor 4 gamma 2	Eif4g2	tr|A0JNY7|A0JNY7_MOUSE Eukaryotic translation initiation factor 4, gamma 2 OS=Mus musculus GN=Eif4g2 PE=2 SV=1;tr|G3XA17|G3XA17_MOUSE Eukaryotic translation initiation factor 4 gamma 2 OS=Mus musculus GN=Eif4g2 PE=1 SV=1;sp|Q62448|IF4G2_MOUSE Eukaryotic tr	7116600000	7453800000	7281500000	390210000	127080000	133100000	130030000	12225000000	11955000000	11888000000	39	39	39	50.6	50.6	50.6	102.13	0	283.44	21852000000	184	35	33	35	35	33	35	35	33	35	60	64	60
28	A0JNZ1;Q8BTI9;Q9CTK7;Q3TNJ8;Q8CFF1;S4R1S1;B0QZL5;Q546P7;Q3UDT3;Q8CI98;Q3TBW3;Q8BS14;Q3T9Y0;O35904	A0JNZ1;Q8BTI9;Q9CTK7;Q3TNJ8	Phosphatidylinositol 4,5-bisphosphate 3-kinase catalytic subunit beta isoform	Pik3cb	tr|A0JNZ1|A0JNZ1_MOUSE Pik3cb protein OS=Mus musculus GN=Pik3cb PE=2 SV=1;sp|Q8BTI9|PK3CB_MOUSE Phosphatidylinositol 4,5-bisphosphate 3-kinase catalytic subunit beta isoform OS=Mus musculus GN=Pik3cb PE=1 SV=2;tr|Q9CTK7|Q9CTK7_MOUSE Putative uncharacterize	81401000	11336000	38391000	2081400	1292100	179940	609380	104990000	85150000	0	6	6	6	7.5	7.5	7.5	119.64	0	10.048	131130000	7	2	2	3	2	2	3	2	2	3	2	2	3
29	A0JP53;D3YXJ0;Q6A0B7;E9PUQ8	A0JP53;D3YXJ0;Q6A0B7;E9PUQ8	Diacylglycerol kinase	Dgkh;Dgkd	tr|A0JP53|A0JP53_MOUSE Diacylglycerol kinase OS=Mus musculus GN=Dgkh PE=2 SV=1;tr|D3YXJ0|D3YXJ0_MOUSE Diacylglycerol kinase OS=Mus musculus GN=Dgkh PE=3 SV=1;tr|Q6A0B7|Q6A0B7_MOUSE Diacylglycerol kinase (Fragment) OS=Mus musculus GN=Dgkd PE=2 SV=1;tr|E9PUQ	19939000	22776000	57586000	1671700	332310	379600	959760	45322000	45367000	68072000	2	2	2	4.3	4.3	4.3	119.87	0	4.0241	100300000	4	1	1	2	1	1	2	1	1	2	1	1	2
30	A0MNP4;Q9ERF3;Q8BVQ0;D6RDC7;D6RJ72;Q8BKW0	A0MNP4;Q9ERF3;Q8BVQ0;D6RDC7	WD repeat-containing protein 61;WD repeat-containing protein 61, N-terminally processed	Wdr61	tr|A0MNP4|A0MNP4_MOUSE CDW13/WDR61 OS=Mus musculus GN=Wdr61 PE=2 SV=1;sp|Q9ERF3|WDR61_MOUSE WD repeat-containing protein 61 OS=Mus musculus GN=Wdr61 PE=2 SV=1;tr|Q8BVQ0|Q8BVQ0_MOUSE WD repeat-containing protein 61 OS=Mus musculus GN=Wdr61 PE=2 SV=1;tr|D6RD	1830200000	1869300000	1486500000	345730000	122010000	124620000	99098000	2944500000	2768000000	2818000000	13	13	13	59	59	59	33.772	0	55.784	5186000000	59	10	11	11	10	11	11	10	11	11	20	20	19
31	A0PJ63;G5E8V8;Q9JJT9;F6RPD4	A0PJ63;G5E8V8;Q9JJT9;F6RPD4	Phosphorylated adapter RNA export protein	Phax	tr|A0PJ63|A0PJ63_MOUSE Phax protein (Fragment) OS=Mus musculus GN=Phax PE=2 SV=1;tr|G5E8V8|G5E8V8_MOUSE Phosphorylated adapter RNA export protein OS=Mus musculus GN=Phax PE=1 SV=1;sp|Q9JJT9|PHAX_MOUSE Phosphorylated adapter RNA export protein OS=Mus muscul	376690000	488670000	623090000	82691000	20927000	27148000	34616000	720260000	766130000	985790000	5	5	5	22.2	22.2	22.2	34.964	0	10.039	1488400000	19	3	3	4	3	3	4	3	3	4	4	8	7
32	A0PJ89;Q810V0;Q9D7V6;Q9CYN7;Q8K0Z2	A0PJ89;Q810V0;Q9D7V6	U3 small nucleolar ribonucleoprotein protein MPP10	Mphosph10	tr|A0PJ89|A0PJ89_MOUSE Mphosph10 protein (Fragment) OS=Mus musculus GN=Mphosph10 PE=2 SV=1;sp|Q810V0|MPP10_MOUSE U3 small nucleolar ribonucleoprotein protein MPP10 OS=Mus musculus GN=Mphosph10 PE=1 SV=2;tr|Q9D7V6|Q9D7V6_MOUSE Putative uncharacterized prote	996040000	1096700000	991280000	123360000	39841000	43867000	39651000	1520400000	1572500000	1504000000	12	12	12	32.2	32.2	32.2	68.735	0	45.387	3084000000	36	10	10	10	10	10	10	10	10	10	10	14	12
33	A0PJC8;A2A3Z2;A2A3Z3;Q8BN78	A0PJC8;A2A3Z2;A2A3Z3;Q8BN78	Transcriptional regulator Kaiso	Zbtb33	tr|A0PJC8|A0PJC8_MOUSE Zbtb33 protein (Fragment) OS=Mus musculus GN=Zbtb33 PE=2 SV=1;tr|A2A3Z2|A2A3Z2_MOUSE Transcriptional regulator Kaiso (Fragment) OS=Mus musculus GN=Zbtb33 PE=4 SV=1;tr|A2A3Z3|A2A3Z3_MOUSE Zinc finger and BTB domain containing 33 OS=Mu	43583000	7909600	0	1907100	1614200	292950	0	93189000	0	0	3	3	3	7.2	7.2	7.2	61.007	0	5.5123	51492000	3	2	1	1	2	1	1	2	1	1	1	1	1
34	A0PK78;Q78PG9	A0PK78;Q78PG9	Coiled-coil domain-containing protein 25	Ccdc25	tr|A0PK78|A0PK78_MOUSE Coiled-coil domain containing 25 OS=Mus musculus GN=Ccdc25 PE=2 SV=1;sp|Q78PG9|CCD25_MOUSE Coiled-coil domain-containing protein 25 OS=Mus musculus GN=Ccdc25 PE=1 SV=1	93444000	143670000	147660000	24048000	5840200	8979300	9228700	0	171520000	173740000	4	4	4	22.1	22.1	22.1	24.48	0	9.0942	384770000	6	1	2	3	1	2	3	1	2	3	1	2	3
35	E9PYF4;A0T1J8;Q6ZQ32;E9PYI7;Q3UPW3	E9PYF4;A0T1J8;Q6ZQ32;E9PYI7		Lmo7	tr|E9PYF4|E9PYF4_MOUSE Protein Lmo7 OS=Mus musculus GN=Lmo7 PE=1 SV=1;tr|A0T1J8|A0T1J8_MOUSE LIM domain only 7 OS=Mus musculus GN=Lmo7 PE=2 SV=1;tr|Q6ZQ32|Q6ZQ32_MOUSE MKIAA0858 protein (Fragment) OS=Mus musculus GN=Lmo7 PE=2 SV=1;tr|E9PYI7|E9PYI7_MOUSE Pr	1630500000	1837400000	1516400000	42968000	14056000	15840000	13073000	2579700000	2723500000	2497400000	29	29	2	25.8	25.8	1.8	192.55	0	161.33	4984300000	77	18	21	24	18	21	24	1	1	2	19	28	30
36	A2A8Y5;A0ZV96;Q8BHW2	A2A8Y5;A0ZV96;Q8BHW2	Protein OSCP1	Oscp1	tr|A2A8Y5|A2A8Y5_MOUSE Organic solute carrier 1 (Fragment) OS=Mus musculus GN=Oscp1 PE=2 SV=1;tr|A0ZV96|A0ZV96_MOUSE Organic solute carrier protein 1 isoform OS=Mus musculus GN=Oscp1 PE=2 SV=1;sp|Q8BHW2|OSCP1_MOUSE Protein OSCP1 OS=Mus musculus GN=Oscp1 PE	170800000	105530000	116670000	13100000	5693400	3517600	3889100	198950000	240950000	195670000	5	5	5	20.3	20.3	20.3	43.231	0	17.659	393010000	11	4	2	3	4	2	3	4	2	3	5	2	4
37	E9QAE3;A0ZVB6;Q52KH4;Q8BTS9	E9QAE3;A0ZVB6;Q52KH4		Btaf1	tr|E9QAE3|E9QAE3_MOUSE Protein Btaf1 OS=Mus musculus GN=Btaf1 PE=4 SV=1;tr|A0ZVB6|A0ZVB6_MOUSE TBP-associated factor 170 OS=Mus musculus GN=Btaf1 PE=2 SV=1;tr|Q52KH4|Q52KH4_MOUSE Btaf1 protein (Fragment) OS=Mus musculus GN=Btaf1 PE=2 SV=1	2392100000	2025200000	1657400000	60747000	23921000	20252000	16574000	3411700000	3532000000	3586700000	41	41	41	30.2	30.2	30.2	207.05	0	148.61	6074700000	129	31	32	29	31	32	29	31	32	29	47	45	37
38	A1A4C2;Q3ZAQ4	A1A4C2;Q3ZAQ4		Atg9a	tr|A1A4C2|A1A4C2_MOUSE Atg9a protein (Fragment) OS=Mus musculus GN=Atg9a PE=2 SV=1;tr|Q3ZAQ4|Q3ZAQ4_MOUSE Autophagy 9-like 1 protein OS=Mus musculus GN=Atg9a PE=1 SV=1	33839000	125300000	128480000	11505000	1353600	5012100	5139300	39605000	164960000	172920000	2	2	2	4.7	4.7	4.7	53.738	0	5.094	287620000	6	2	1	1	2	1	1	2	1	1	3	1	2
39	A1A4T2;Q8BHN3-2;Q3UE86;Q8BHN3-3;Q9R1N7;REV__D6REU9;REV__Q5ERC7;REV__B9EHN5;REV__B7ZNE4;REV__Q7TSP0;REV__Q3T9X0	A1A4T2;Q8BHN3-2;Q3UE86;Q8BHN3-3	Neutral alpha-glucosidase AB	Ganab	tr|A1A4T2|A1A4T2_MOUSE Alpha glucosidase 2 alpha neutral subunit OS=Mus musculus GN=Ganab PE=2 SV=1;sp|Q8BHN3-2|GANAB_MOUSE Isoform 2 of Neutral alpha-glucosidase AB OS=Mus musculus GN=Ganab;tr|Q3UE86|Q3UE86_MOUSE Putative uncharacterized protein (Fragment	39592000000	33930000000	33315000000	1842000000	682620000	584990000	574390000	53706000000	52256000000	57642000000	45	45	1	56.5	56.5	1.1	109.4	0	323.31	106840000000	432	42	41	41	42	41	41	1	1	1	152	137	143
40	Q3UG53;A1A553;Q5DTS2;O55098	Q3UG53;A1A553;Q5DTS2;O55098	Serine/threonine-protein kinase 10	Stk10	tr|Q3UG53|Q3UG53_MOUSE Putative uncharacterized protein OS=Mus musculus GN=Stk10 PE=2 SV=1;tr|A1A553|A1A553_MOUSE Serine/threonine kinase 10 OS=Mus musculus GN=Stk10 PE=2 SV=1;tr|Q5DTS2|Q5DTS2_MOUSE MKIAA4026 protein (Fragment) OS=Mus musculus GN=Stk10 PE=	41787000	104880000	63623000	3967700	788440	1978900	1200400	76724000	153930000	109530000	7	6	6	8.5	7.6	7.6	111.84	0	12.386	210290000	7	2	7	3	1	6	2	1	6	2	0	5	2
41	S4R2S6;A2BD48;A2VCT6;E9PWX7;A1A5B6	S4R2S6;A2BD48;A2VCT6;E9PWX7;A1A5B6	TBC1 domain family member 25	Tbc1d25	tr|S4R2S6|S4R2S6_MOUSE TBC1 domain family member 25 OS=Mus musculus GN=Tbc1d25 PE=4 SV=1;tr|A2BD48|A2BD48_MOUSE Tbc1d25 protein (Fragment) OS=Mus musculus GN=Tbc1d25 PE=2 SV=1;tr|A2VCT6|A2VCT6_MOUSE Tbc1d25 protein (Fragment) OS=Mus musculus GN=Tbc1d25 PE=	69015000	12353000	12460000	3909500	2875600	514700	519150	0	25949000	28020000	2	2	2	5.2	5.2	5.2	62.478	0	5.2654	93827000	3	1	1	1	1	1	1	1	1	1	1	1	1
42	A1BN54;Q9JI91;Q5FW75;Q8K3Q4;D3YY95;Q9CTH3;Q3UYE4	A1BN54		Actn1	tr|A1BN54|A1BN54_MOUSE Alpha actinin 1a OS=Mus musculus GN=Actn1 PE=2 SV=1	0	8376400	12772000	364620	0	144420	220200	0	20978000	28842000	62	1	1	77.2	1.9	1.9	102.72	0	3.633	21148000	2	55	56	58	0	1	1	0	1	1	0	1	1
43	A1E5T5;P51807;Q9DAS3;Q9CT63;Q5EBK8	A1E5T5;P51807;Q9DAS3;Q9CT63;Q5EBK8	Dynein light chain Tctex-type 1	Dynlt1	tr|A1E5T5|A1E5T5_MOUSE Tctex-1 OS=Mus musculus PE=2 SV=1;sp|P51807|DYLT1_MOUSE Dynein light chain Tctex-type 1 OS=Mus musculus GN=Dynlt1 PE=1 SV=1;tr|Q9DAS3|Q9DAS3_MOUSE Putative uncharacterized protein OS=Mus musculus PE=2 SV=1;tr|Q9CT63|Q9CT63_MOUSE Puta	698130000	681950000	689920000	345000000	116350000	113660000	114990000	1170400000	920800000	1061300000	4	4	4	60.2	60.2	60.2	12.482	0	49.197	2070000000	26	4	4	4	4	4	4	4	4	4	9	8	9
44	A1ILG8;Q8BX70-3;Q8BX70;Q8BX70-2;A1ILH1;A1ILH0;A1ILG9;A1ILH3;A1ILH2	A1ILG8;Q8BX70-3;Q8BX70;Q8BX70-2	Vacuolar protein sorting-associated protein 13C	Vps13c	tr|A1ILG8|A1ILG8_MOUSE Chorein OS=Mus musculus GN=Vps13c PE=2 SV=1;sp|Q8BX70-3|VP13C_MOUSE Isoform 3 of Vacuolar protein sorting-associated protein 13C OS=Mus musculus GN=Vps13c;sp|Q8BX70|VP13C_MOUSE Vacuolar protein sorting-associated protein 13C OS=Mus m	1665700000	1708000000	1398500000	21891000	7641000	7834700	6415200	2614400000	2534300000	2877100000	57	57	57	21.2	21.2	21.2	420.08	0	144.04	4772200000	126	40	44	35	40	44	35	40	44	35	41	48	37
45	A1L013;Q9CS00	A1L013;Q9CS00	Cactin	Cactin	tr|A1L013|A1L013_MOUSE Cactin OS=Mus musculus GN=Cactin PE=2 SV=1;sp|Q9CS00|CATIN_MOUSE Cactin OS=Mus musculus GN=Cactin PE=1 SV=2	495340000	43716000	193200000	20341000	13760000	1214300	5366700	317220000	192680000	572900000	8	8	8	16.6	16.6	16.6	90.66	0	14.548	732260000	12	5	3	7	5	3	7	5	3	7	3	2	7
46	A1L0U3;B9EI85;P84228;F8WI35;E0CYN1;E0CYR7	A1L0U3;B9EI85;P84228;F8WI35	Histone H3;Histone H3.2	Hist1h3e;Hist2h3b;Hist1h3b;H3f3a	tr|A1L0U3|A1L0U3_MOUSE Histone H3 (Fragment) OS=Mus musculus GN=Hist1h3e PE=2 SV=1;tr|B9EI85|B9EI85_MOUSE Histone H3 OS=Mus musculus GN=Hist2h3b PE=2 SV=1;sp|P84228|H32_MOUSE Histone H3.2 OS=Mus musculus GN=Hist1h3b PE=1 SV=2;tr|F8WI35|F8WI35_MOUSE Histone	64845000000	82152000000	69532000000	36088000000	10807000000	13692000000	11589000000	65459000000	73077000000	65898000000	9	9	1	61.7	61.7	24.1	15.029	0	61.724	216530000000	357	8	8	8	8	8	8	1	1	1	122	116	119
47	A1L0U6;A2AS98;P28660;P28660-2;Q3UDY0;Q8K1X4	A1L0U6;A2AS98;P28660;P28660-2	Nck-associated protein 1	Nckap1	tr|A1L0U6|A1L0U6_MOUSE Nckap1 protein (Fragment) OS=Mus musculus GN=Nckap1 PE=2 SV=1;tr|A2AS98|A2AS98_MOUSE Nck-associated protein 1 OS=Mus musculus GN=Nckap1 PE=4 SV=1;sp|P28660|NCKP1_MOUSE Nck-associated protein 1 OS=Mus musculus GN=Nckap1 PE=1 SV=2;sp|P	6007000000	5336200000	5218000000	254790000	92416000	82095000	80277000	9739500000	8833599000	8483300000	39	39	39	42.1	42.1	42.1	129.38	0	221.55	16561000000	172	36	32	31	36	32	31	36	32	31	63	55	54
48	A1L0V4;P68433	A1L0V4;P68433	Histone H3;Histone H3.1	Hist1h3i;Hist1h3a	tr|A1L0V4|A1L0V4_MOUSE Histone H3 (Fragment) OS=Mus musculus GN=Hist1h3i PE=2 SV=1;sp|P68433|H31_MOUSE Histone H3.1 OS=Mus musculus GN=Hist1h3a PE=1 SV=2	0	0	0	0	0	0	0	0	0	0	9	1	1	60.7	23.7	23.7	15.273	0	33.547	0	0	8	8	8	1	1	1	1	1	1	0	0	0
49	A1L0V6;A7YY79;Q6Q899;A2AP29;Q3U1I9;Q3KQQ7;Q05CC6;Q6Q899-2;Q8C6Y8;Q6Q899-3;Q6Q899-4	A1L0V6;A7YY79;Q6Q899;A2AP29;Q3U1I9;Q3KQQ7;Q05CC6;Q6Q899-2	Probable ATP-dependent RNA helicase DDX58	Ddx58	tr|A1L0V6|A1L0V6_MOUSE Ddx58 protein (Fragment) OS=Mus musculus GN=Ddx58 PE=2 SV=1;tr|A7YY79|A7YY79_MOUSE Ddx58 protein (Fragment) OS=Mus musculus GN=Ddx58 PE=2 SV=1;sp|Q6Q899|DDX58_MOUSE Probable ATP-dependent RNA helicase DDX58 OS=Mus musculus GN=Ddx58 P	483960000	625180000	584290000	32566000	9306900	12023000	11236000	866560000	1027500000	1062800000	15	15	15	18.9	18.9	18.9	105.68	0	35.935	1693400000	41	7	11	12	7	11	12	7	11	12	10	16	15
50	A1L2Z0;Q920F6;Q8BZI2;Q6WIZ7	A1L2Z0;Q920F6;Q8BZI2;Q6WIZ7	Structural maintenance of chromosomes protein;Structural maintenance of chromosomes protein 1B	Smc1b;Svs1	tr|A1L2Z0|A1L2Z0_MOUSE Structural maintenance of chromosomes protein OS=Mus musculus GN=Smc1b PE=2 SV=1;sp|Q920F6|SMC1B_MOUSE Structural maintenance of chromosomes protein 1B OS=Mus musculus GN=Smc1b PE=1 SV=1;tr|Q8BZI2|Q8BZI2_MOUSE Putative uncharacterize	184800000	253010000	242960000	8104400	2200000	3012000	2892400	325700000	371070000	497450000	2	2	2	0.6	0.6	0.6	144.51	0.00015466	2.8698	680770000	8	2	2	2	2	2	2	2	2	2	2	3	3
51	A1L2Z3;Q8C7X2;Z4YJW0;Q8C7X2-3	A1L2Z3;Q8C7X2;Z4YJW0	ER membrane protein complex subunit 1	Emc1	tr|A1L2Z3|A1L2Z3_MOUSE C230096C10Rik protein OS=Mus musculus GN=Emc1 PE=2 SV=1;sp|Q8C7X2|EMC1_MOUSE ER membrane protein complex subunit 1 OS=Mus musculus GN=Emc1 PE=1 SV=1;tr|Z4YJW0|Z4YJW0_MOUSE ER membrane protein complex subunit 1 OS=Mus musculus GN=Emc1	7374500	0	4755400	233270	141820	0	91449	0	0	5018400	31	1	1	38.2	1.3	1.3	111.63	0.006993	1.477	12130000	0	27	25	27	1	0	1	1	0	1	0	0	0
52	Q05BC8;A2A4N5;Q6ZQK3;A2A4N8;A2A4N7;K3W4P1;A1L329;P97432;F6S397;Q91ZQ8	Q05BC8;A2A4N5;Q6ZQK3;A2A4N8;A2A4N7;K3W4P1;A1L329;P97432;F6S397;Q91ZQ8	Next to BRCA1 gene 1 protein	Nbr1	tr|Q05BC8|Q05BC8_MOUSE Nbr1 protein OS=Mus musculus GN=Nbr1 PE=2 SV=1;tr|A2A4N5|A2A4N5_MOUSE Next to BRCA1 gene 1 protein OS=Mus musculus GN=Nbr1 PE=4 SV=1;tr|Q6ZQK3|Q6ZQK3_MOUSE MKIAA0049 protein (Fragment) OS=Mus musculus GN=Nbr1 PE=2 SV=1;tr|A2A4N8|A2A4	180700000	173410000	111270000	14103000	5475900	5254900	3371800	204920000	208520000	208140000	8	8	8	18.8	18.8	18.8	98.815	0	15.323	465390000	12	5	4	5	5	4	5	5	4	5	5	3	4
53	A1L332;F6WYQ5;P70704-2;Q5DTG0;P70704-3;P70704;Q3U9N5;Q8CA15;E9Q4J5;F6Q8P7;Q52KQ7	A1L332;F6WYQ5;P70704-2;Q5DTG0;P70704-3;P70704;Q3U9N5;Q8CA15	Phospholipid-transporting ATPase;Phospholipid-transporting ATPase IA	Atp8a1	tr|A1L332|A1L332_MOUSE Atp8a1 protein OS=Mus musculus GN=Atp8a1 PE=2 SV=1;tr|F6WYQ5|F6WYQ5_MOUSE Phospholipid-transporting ATPase IA (Fragment) OS=Mus musculus GN=Atp8a1 PE=1 SV=1;sp|P70704-2|AT8A1_MOUSE Isoform 2 of Phospholipid-transporting ATPase IA OS=	155930000	16604000	16751000	2912000	2398900	255440	257710	147410000	97108000	115000000	4	4	4	4.6	4.6	4.6	131.18	0	5.9508	189280000	5	4	1	1	4	1	1	4	1	1	3	1	1
54	Q91ZZ2;A1L338;Q3UGX8;Q3UHC1;Q8C5V7;F6ZDE5;E0CXV1	Q91ZZ2;A1L338;Q3UGX8;Q3UHC1;Q8C5V7;F6ZDE5		Rapgef1	tr|Q91ZZ2|Q91ZZ2_MOUSE Guanine nucleotide exchange factor OS=Mus musculus GN=Rapgef1 PE=1 SV=1;tr|A1L338|A1L338_MOUSE Rapgef1 protein OS=Mus musculus GN=Rapgef1 PE=2 SV=1;tr|Q3UGX8|Q3UGX8_MOUSE Protein Rapgef1 OS=Mus musculus GN=Rapgef1 PE=1 SV=1;tr|Q3UHC1	25169000	95563000	54164000	3123100	449450	1706500	967210	46887000	134130000	100020000	5	5	5	8.3	8.3	8.3	121.92	0	10.432	174900000	9	1	5	3	1	5	3	1	5	3	1	5	3
55	A1L341;A9C475;Q61214;Q8K006;Q8C774;A9C477;Q9Z188-2;Q9Z188;Q9Z188-3;Q61158;A9C478;Q80ZK5	A1L341;A9C475;Q61214;Q8K006;Q8C774	Dual specificity tyrosine-phosphorylation-regulated kinase 1A	Dyrk1a	tr|A1L341|A1L341_MOUSE Dual-specificity tyrosine-phosphorylation-regulated kinase 1A OS=Mus musculus GN=Dyrk1a PE=1 SV=1;tr|A9C475|A9C475_MOUSE Dual-specificity tyrosine-(Y)-phosphorylation regulated kinase 1a OS=Mus musculus GN=Dyrk1a PE=2 SV=1;sp|Q61214|	534730000	348230000	203800000	33961000	16710000	10882000	6368600	760590000	893480000	699350000	8	8	8	15	15	15	84.466	0	21.061	1086800000	28	6	6	5	6	6	5	6	6	5	11	11	6
56	B2CSK2;A1L347;P16627;Q9QWU1;Q91ZU4;Q91ZU5;Q9R2A1	B2CSK2;A1L347;P16627;Q9QWU1;Q91ZU4	Heat shock 70 kDa protein 1-like	Hspa1l;Hsc70t	tr|B2CSK2|B2CSK2_MOUSE Heat shock protein 1-like protein OS=Mus musculus PE=3 SV=1;tr|A1L347|A1L347_MOUSE Heat shock protein 1-like OS=Mus musculus GN=Hspa1l PE=2 SV=1;sp|P16627|HS71L_MOUSE Heat shock 70 kDa protein 1-like OS=Mus musculus GN=Hspa1l PE=2 SV	18439000	0	15902000	858530	460990	0	397540	41952000	0	26801000	15	2	2	27.6	6.1	6.1	70.606	0	3.5868	34341000	2	11	13	12	1	1	1	1	1	1	1	0	1
57	A1L361;Q9WUN2;Q3THP3	A1L361;Q9WUN2;Q3THP3	Serine/threonine-protein kinase TBK1	Tbk1	tr|A1L361|A1L361_MOUSE TANK-binding kinase 1 OS=Mus musculus GN=Tbk1 PE=2 SV=1;sp|Q9WUN2|TBK1_MOUSE Serine/threonine-protein kinase TBK1 OS=Mus musculus GN=Tbk1 PE=1 SV=1;tr|Q3THP3|Q3THP3_MOUSE Putative uncharacterized protein OS=Mus musculus GN=Tbk1 PE=2	306940000	220840000	245120000	17566000	6976000	5019000	5570800	300290000	357430000	354900000	11	11	11	20.9	20.9	20.9	83.424	0	24.231	772890000	18	8	6	7	8	6	7	8	6	7	5	6	7
58	A1L367;A1L366;Q61550;Q3TG35;Q3UTE4;Q6ZQJ6;R4GML2;A2AU37	A1L367;A1L366;Q61550;Q3TG35;Q3UTE4;Q6ZQJ6	Double-strand-break repair protein rad21 homolog	Rad21	tr|A1L367|A1L367_MOUSE RAD21 homolog (S. pombe) OS=Mus musculus GN=Rad21 PE=2 SV=1;tr|A1L366|A1L366_MOUSE RAD21 homolog (S. pombe) OS=Mus musculus GN=Rad21 PE=2 SV=1;sp|Q61550|RAD21_MOUSE Double-strand-break repair protein rad21 homolog OS=Mus musculus GN=	3028400000	3351600000	2950800000	358880000	116480000	128910000	113490000	5135700000	5093900000	4096800000	23	23	23	50.4	50.4	50.4	72.022	0	183.08	9330800000	87	19	20	21	19	20	21	19	20	21	26	31	30
59	A1L3B6;Q9D7Z3-2;Q9D7Z3	A1L3B6;Q9D7Z3-2;Q9D7Z3	Nucleolar protein 7	Nol7	tr|A1L3B6|A1L3B6_MOUSE Nol7 protein OS=Mus musculus GN=Nol7 PE=2 SV=1;sp|Q9D7Z3-2|NOL7_MOUSE Isoform 2 of Nucleolar protein 7 OS=Mus musculus GN=Nol7;sp|Q9D7Z3|NOL7_MOUSE Nucleolar protein 7 OS=Mus musculus GN=Nol7 PE=1 SV=1	226060000	163640000	144690000	66799000	28258000	20456000	18086000	345520000	344480000	363050000	5	5	5	21.3	21.3	21.3	28.97	0	15.496	534390000	13	3	3	4	3	3	4	3	3	4	4	4	5
60	A1L3B8;P26516	A1L3B8;P26516	26S proteasome non-ATPase regulatory subunit 7	Psmd7	tr|A1L3B8|A1L3B8_MOUSE Proteasome (Prosome, macropain) 26S subunit, non-ATPase, 7 OS=Mus musculus GN=Psmd7 PE=2 SV=1;sp|P26516|PSMD7_MOUSE 26S proteasome non-ATPase regulatory subunit 7 OS=Mus musculus GN=Psmd7 PE=1 SV=2	4629100000	4243300000	4276000000	876560000	308610000	282890000	285060000	7300100000	6787600000	6212600000	14	14	14	63.6	63.6	63.6	36.539	0	140.68	13148000000	87	11	11	14	11	11	14	11	11	14	27	31	29
61	A1L3C2;P52432;G3UXX5;D3Z7Q8;D3Z3D6;G3UX92	A1L3C2;P52432;G3UXX5;D3Z7Q8;D3Z3D6	DNA-directed RNA polymerases I and III subunit RPAC1	Polr1c	tr|A1L3C2|A1L3C2_MOUSE Polr1c protein OS=Mus musculus GN=Polr1c PE=2 SV=1;sp|P52432|RPAC1_MOUSE DNA-directed RNA polymerases I and III subunit RPAC1 OS=Mus musculus GN=Polr1c PE=1 SV=3;tr|G3UXX5|G3UXX5_MOUSE DNA-directed RNA polymerases I and III subunit R	457090000	505330000	489310000	85396000	26888000	29725000	28783000	816740000	898610000	880100000	5	5	5	19.3	19.3	19.3	39.237	0	27.089	1451700000	18	4	5	5	4	5	5	4	5	5	5	6	7
62	Q80U52;A1L3P4;Q8BTG0;D3Z0Q9;B0QZV3	Q80U52;A1L3P4;Q8BTG0;D3Z0Q9;B0QZV3	Sodium/hydrogen exchanger	Slc9a6	tr|Q80U52|Q80U52_MOUSE Sodium/hydrogen exchanger (Fragment) OS=Mus musculus GN=Slc9a6 PE=2 SV=1;tr|A1L3P4|A1L3P4_MOUSE Sodium/hydrogen exchanger OS=Mus musculus GN=Slc9a6 PE=1 SV=1;tr|Q8BTG0|Q8BTG0_MOUSE Sodium/hydrogen exchanger OS=Mus musculus GN=Slc9a6	52366000	48248000	31405000	6000800	2380300	2193100	1427500	62064000	49715000	42412000	4	4	4	8	8	8	77.75	0	6.1671	132020000	6	2	3	2	2	3	2	2	3	2	2	2	2
63	Q3URR4;Q9EQ08;Q9EQ07;A1L3T3;Q9JHK6	Q3URR4;Q9EQ08;Q9EQ07;A1L3T3;Q9JHK6		Sgsh	tr|Q3URR4|Q3URR4_MOUSE Putative uncharacterized protein (Fragment) OS=Mus musculus GN=Sgsh PE=2 SV=1;tr|Q9EQ08|Q9EQ08_MOUSE Heparan N-sulfatase OS=Mus musculus GN=Sgsh PE=2 SV=1;tr|Q9EQ07|Q9EQ07_MOUSE Mutant heparan N-sulfatase OS=Mus musculus GN=Sgsh PE=2	72386000	21242000	84763000	7432900	3016100	885090	3531800	128470000	122250000	155660000	3	3	3	9.1	9.1	9.1	55.805	0	12.257	178390000	5	2	2	2	2	2	2	2	2	2	2	1	2
64	A2A432;E9PXY1;A2A432-2;J3QJX0;Q3TP81;REV__Q8BIY3;REV__E9QNR7	A2A432;E9PXY1;A2A432-2;J3QJX0	Cullin-4B	Cul4b	sp|A2A432|CUL4B_MOUSE Cullin-4B OS=Mus musculus GN=Cul4b PE=1 SV=1;tr|E9PXY1|E9PXY1_MOUSE Cullin-4B OS=Mus musculus GN=Cul4b PE=1 SV=2;sp|A2A432-2|CUL4B_MOUSE Isoform 2 of Cullin-4B OS=Mus musculus GN=Cul4b;tr|J3QJX0|J3QJX0_MOUSE Cullin-4B OS=Mus musculus	5893700000	5975900000	4931700000	262520000	92090000	93374000	77057000	10250000000	10195000000	9251100000	42	42	30	47.8	47.8	36.2	110.7	0	190.79	16801000000	180	37	34	35	37	34	35	25	23	25	61	57	62
65	A5D6Q2;B2RUJ1;A2A468;Q3UQL7;Q05BA5;O09000;Q3UV84	A5D6Q2;B2RUJ1;A2A468;Q3UQL7;Q05BA5;O09000;Q3UV84	Nuclear receptor coactivator 3	Ncoa3	tr|A5D6Q2|A5D6Q2_MOUSE Ncoa3 protein (Fragment) OS=Mus musculus GN=Ncoa3 PE=2 SV=1;tr|B2RUJ1|B2RUJ1_MOUSE Ncoa3 protein OS=Mus musculus GN=Ncoa3 PE=2 SV=1;tr|A2A468|A2A468_MOUSE Nuclear receptor coactivator 3 OS=Mus musculus GN=Ncoa3 PE=1 SV=1;tr|Q3UQL7|Q3	39246000	90535000	30077000	2537400	622950	1437100	477410	105050000	168370000	97654000	5	5	5	5.8	5.8	5.8	146.4	0	7.8012	159860000	8	2	4	2	2	4	2	2	4	2	2	4	2
66	A2A483;E9Q8D1;Q3UH28;Q3V1I9;Q3U1M7;A2A484;Q8CHB3;Q80Y82;A2A482;A2A485;Q80XT8;Q3V437;A2A486	A2A483;E9Q8D1;Q3UH28;Q3V1I9;Q3U1M7;A2A484;Q8CHB3;Q80Y82;A2A482;A2A485;Q80XT8		Zmynd8	tr|A2A483|A2A483_MOUSE Protein Zmynd8 OS=Mus musculus GN=Zmynd8 PE=1 SV=1;tr|E9Q8D1|E9Q8D1_MOUSE Protein Zmynd8 OS=Mus musculus GN=Zmynd8 PE=1 SV=2;tr|Q3UH28|Q3UH28_MOUSE Protein Zmynd8 OS=Mus musculus GN=Zmynd8 PE=1 SV=1;tr|Q3V1I9|Q3V1I9_MOUSE Putative un	1167100000	1189900000	1398900000	51451000	15988000	16299000	19164000	1880800000	1989000000	1974900000	28	28	14	33.8	33.8	17.2	130.19	0	75.864	3755900000	71	20	21	22	20	21	22	11	9	9	23	24	24
67	A2A4A1;Q91ZF0;F7CGC9	A2A4A1;Q91ZF0;F7CGC9	DnaJ homolog subfamily C member 24	Dnajc24	tr|A2A4A1|A2A4A1_MOUSE DnaJ homolog subfamily C member 24 OS=Mus musculus GN=Dnajc24 PE=4 SV=1;sp|Q91ZF0|DJC24_MOUSE DnaJ homolog subfamily C member 24 OS=Mus musculus GN=Dnajc24 PE=1 SV=3;tr|F7CGC9|F7CGC9_MOUSE DnaJ homolog subfamily C member 24 (Fragment	49137000	173480000	28012000	25063000	4913700	17348000	2801200	133240000	352490000	29193000	3	3	3	24.3	24.3	24.3	16.922	0	4.3236	250630000	4	1	1	3	1	1	3	1	1	3	1	1	2
68	A2A4A6;Q62077;Q2M4I9;Q3UZ68;G3UXP4;Q3TUJ5;F6SLL0;Q792T1;G3V016;Q9Z2S5	A2A4A6;Q62077;Q2M4I9;Q3UZ68	Phosphoinositide phospholipase C;1-phosphatidylinositol 4,5-bisphosphate phosphodiesterase gamma-1	Plcg1	tr|A2A4A6|A2A4A6_MOUSE Phosphoinositide phospholipase C OS=Mus musculus GN=Plcg1 PE=1 SV=1;sp|Q62077|PLCG1_MOUSE 1-phosphatidylinositol 4,5-bisphosphate phosphodiesterase gamma-1 OS=Mus musculus GN=Plcg1 PE=1 SV=2;tr|Q2M4I9|Q2M4I9_MOUSE Phosphoinositide ph	1191200000	878750000	803440000	41048000	17017000	12554000	11478000	1875700000	1338900000	1774700000	24	24	24	25.9	25.9	25.9	148.53	0	64.277	2873400000	47	17	14	13	17	14	13	17	14	13	17	17	13
69	Q3UQQ4;A2A4P0;Q5DTN5;A2A4N9;Q3TUC8;Q3U580;Q8R214	Q3UQQ4;A2A4P0;Q5DTN5;A2A4N9;Q3TUC8	ATP-dependent RNA helicase DHX8	Dhx8	tr|Q3UQQ4|Q3UQQ4_MOUSE Putative uncharacterized protein OS=Mus musculus GN=Dhx8 PE=2 SV=1;sp|A2A4P0|DHX8_MOUSE ATP-dependent RNA helicase DHX8 OS=Mus musculus GN=Dhx8 PE=2 SV=1;tr|Q5DTN5|Q5DTN5_MOUSE MKIAA4096 protein (Fragment) OS=Mus musculus GN=Dhx8 PE=	507750000	474700000	374560000	19956000	7466900	6981000	5508200	979990000	919760000	823700000	20	18	18	23.8	22.4	22.4	142.55	0	47.765	1357000000	44	17	15	13	15	13	13	15	13	13	18	13	13
70	A2A4Z1;A2A4Z0;Q9D1C1;Q3UWQ1	A2A4Z1;A2A4Z0;Q9D1C1;Q3UWQ1	Ubiquitin-conjugating enzyme E2 C	Ube2c	tr|A2A4Z1|A2A4Z1_MOUSE Ubiquitin-conjugating enzyme E2 C OS=Mus musculus GN=Ube2c PE=3 SV=1;tr|A2A4Z0|A2A4Z0_MOUSE Ubiquitin-conjugating enzyme E2C OS=Mus musculus GN=Ube2c PE=2 SV=1;sp|Q9D1C1|UBE2C_MOUSE Ubiquitin-conjugating enzyme E2 C OS=Mus musculus G	1243100000	902930000	1220300000	280530000	103590000	75244000	101690000	1870700000	2708700000	2600700000	7	7	7	74.3	74.3	74.3	18.474	0	33.435	3366300000	29	6	4	6	6	4	6	6	4	6	11	8	10
71	A2A547;Q5I0T8;P84099	A2A547;Q5I0T8;P84099	Ribosomal protein L19;60S ribosomal protein L19	Rpl19	tr|A2A547|A2A547_MOUSE Ribosomal protein L19 OS=Mus musculus GN=Rpl19 PE=3 SV=1;tr|Q5I0T8|Q5I0T8_MOUSE Ribosomal protein L19 OS=Mus musculus GN=Rpl19 PE=2 SV=1;sp|P84099|RL19_MOUSE 60S ribosomal protein L19 OS=Mus musculus GN=Rpl19 PE=1 SV=1	2066600000	8580700000	9037900000	2187200000	229620000	953420000	1004200000	7451400000	7260900000	7071400000	8	8	8	33	33	33	23.247	0	40.025	19685000000	98	6	7	8	6	7	8	6	7	8	25	39	34
72	A2A5H8;Q3USC7;Q8VE33	A2A5H8;Q3USC7;Q8VE33	Ganglioside-induced differentiation-associated protein 1-like 1	Gdap1l1	tr|A2A5H8|A2A5H8_MOUSE Ganglioside-induced differentiation-associated protein 1-like 1 (Fragment) OS=Mus musculus GN=Gdap1l1 PE=4 SV=2;tr|Q3USC7|Q3USC7_MOUSE Ganglioside-induced differentiation-associated protein 1-like 1 OS=Mus musculus GN=Gdap1l1 PE=2 SV	4926200	0	0	273680	273680	0	0	11345000	0	0	1	1	1	4.9	4.9	4.9	30.433	0.0019017	2.0799	4926200	1	1	0	0	1	0	0	1	0	0	1	0	0
73	A2A5I7;Q9D3D0;Q9D3D0-2	A2A5I7;Q9D3D0;Q9D3D0-2	Alpha-tocopherol transfer protein-like	Ttpal	tr|A2A5I7|A2A5I7_MOUSE Alpha-tocopherol transfer protein-like (Fragment) OS=Mus musculus GN=Ttpal PE=4 SV=2;sp|Q9D3D0|TTPAL_MOUSE Alpha-tocopherol transfer protein-like OS=Mus musculus GN=Ttpal PE=2 SV=3;sp|Q9D3D0-2|TTPAL_MOUSE Isoform 2 of Alpha-tocophero	33989000	42385000	26086000	9314500	3089900	3853200	2371400	53308000	89552000	75471000	2	2	2	15.4	15.4	15.4	22.403	0.0011866	2.2961	102460000	4	1	2	1	1	2	1	1	2	1	1	2	1
74	A2A5N2;Q9CQV8;Q9CQV8-2;A2A5N1	A2A5N2;Q9CQV8;Q9CQV8-2;A2A5N1	14-3-3 protein beta/alpha;14-3-3 protein beta/alpha, N-terminally processed	Ywhab	tr|A2A5N2|A2A5N2_MOUSE Tyrosine 3-monooxygenase/tryptophan 5-monooxygenase activation protein, beta polypeptide OS=Mus musculus GN=Ywhab PE=2 SV=1;sp|Q9CQV8|1433B_MOUSE 14-3-3 protein beta/alpha OS=Mus musculus GN=Ywhab PE=1 SV=3;sp|Q9CQV8-2|1433B_MOUSE Is	3766700000	3798100000	3716500000	663610000	221570000	223420000	218620000	4187400000	3719900000	3786600000	16	10	10	69.5	52	52	28.086	0	104.64	11281000000	17	16	14	14	10	8	8	10	8	8	6	6	5
75	B2RXY9;A2A5N3	B2RXY9;A2A5N3	Polyadenylate-binding protein	Pabpc1l	tr|B2RXY9|B2RXY9_MOUSE 1810053B01Rik protein OS=Mus musculus GN=Pabpc1l PE=2 SV=1;tr|A2A5N3|A2A5N3_MOUSE Embryonic poly(A)-binding protein OS=Mus musculus GN=Pabpc1l PE=2 SV=1	0	0	0	0	0	0	0	0	0	0	4	1	1	8.1	2.8	2.8	67.364	1	-2	0	0	2	3	4	0	0	1	0	0	1	0	0	0
76	A2A5P3;P48972	A2A5P3;P48972	Myb-related protein B	Mybl2	tr|A2A5P3|A2A5P3_MOUSE Myb-related protein B (Fragment) OS=Mus musculus GN=Mybl2 PE=4 SV=1;sp|P48972|MYBB_MOUSE Myb-related protein B OS=Mus musculus GN=Mybl2 PE=1 SV=1	13830000	0	0	813500	813500	0	0	18357000	0	0	1	1	1	8	8	8	29.032	0.0053878	1.6529	13830000	1	1	0	0	1	0	0	1	0	0	1	0	0
77	A2A5R2;Q3U5C3;Q3U2F2;F6YCJ0	A2A5R2;Q3U5C3;Q3U2F2	Brefeldin A-inhibited guanine nucleotide-exchange protein 2	Arfgef2	sp|A2A5R2|BIG2_MOUSE Brefeldin A-inhibited guanine nucleotide-exchange protein 2 OS=Mus musculus GN=Arfgef2 PE=1 SV=1;tr|Q3U5C3|Q3U5C3_MOUSE Putative uncharacterized protein (Fragment) OS=Mus musculus GN=Arfgef2 PE=2 SV=1;tr|Q3U2F2|Q3U2F2_MOUSE Putative un	2337100000	2076000000	1240400000	51866000	21441000	19046000	11379000	3519700000	3552100000	3521800000	42	42	27	31.8	31.8	23.6	202.24	0	159.37	5653400000	111	31	27	26	31	27	26	20	17	18	38	41	32
78	A2A5S3;Q3TWP5;Q3TU43;Q3UKX3;V9GX87;Q6TNG5	A2A5S3;Q3TWP5;Q3TU43;Q3UKX3;V9GX87;Q6TNG5		Stau1	tr|A2A5S3|A2A5S3_MOUSE Double-stranded RNA-binding protein Staufen homolog 1 OS=Mus musculus GN=Stau1 PE=4 SV=1;tr|Q3TWP5|Q3TWP5_MOUSE Putative uncharacterized protein (Fragment) OS=Mus musculus GN=Stau1 PE=2 SV=1;tr|Q3TU43|Q3TU43_MOUSE Putative uncharacte	0	0	10093000	305830	0	0	305830	0	0	15337000	16	1	1	41	3.2	3.2	54.855	0.0014704	2.1628	10093000	1	10	11	13	0	0	1	0	0	1	0	0	1
79	A2A5Z6;E9Q4K9;E9PYU8;Q9CUN6;A2A5Z6-2;Q6P066;Q80TB1;Q9CSE3;Q8BSC0;Q80WX3	A2A5Z6;E9Q4K9;E9PYU8;Q9CUN6;A2A5Z6-2;Q6P066;Q80TB1;Q9CSE3;Q8BSC0	E3 ubiquitin-protein ligase SMURF2;E3 ubiquitin-protein ligase SMURF1	Smurf2;Smurf1	sp|A2A5Z6|SMUF2_MOUSE E3 ubiquitin-protein ligase SMURF2 OS=Mus musculus GN=Smurf2 PE=1 SV=1;tr|E9Q4K9|E9Q4K9_MOUSE E3 ubiquitin-protein ligase OS=Mus musculus GN=Smurf1 PE=4 SV=1;tr|E9PYU8|E9PYU8_MOUSE E3 ubiquitin-protein ligase OS=Mus musculus GN=Smurf1	32486000	20678000	31862000	1809100	691200	439960	677920	0	48559000	77826000	4	4	4	5.2	5.2	5.2	86.174	0.0021793	1.9936	85027000	4	2	2	2	2	2	2	2	2	2	1	1	2
80	E9Q6A7;A2A655;A2A654;E5D6T0;Q3UPA6;Q8K092;Q6P9L3;Q8CFX5;A2A653;Q8VDN7;Q3TMJ3;A2A652	E9Q6A7;A2A655;A2A654;E5D6T0;Q3UPA6		Bptf	tr|E9Q6A7|E9Q6A7_MOUSE Protein Bptf OS=Mus musculus GN=Bptf PE=4 SV=1;tr|A2A655|A2A655_MOUSE Protein Bptf OS=Mus musculus GN=Bptf PE=4 SV=1;tr|A2A654|A2A654_MOUSE Protein Bptf OS=Mus musculus GN=Bptf PE=4 SV=1;tr|E5D6T0|E5D6T0_MOUSE Bromodomain PHD finger	552250000	230310000	366240000	7364100	3540100	1476400	2347700	601290000	650660000	574260000	18	18	18	9.2	9.2	9.2	321.59	0	35.561	1148800000	27	13	11	12	13	11	12	13	11	12	10	8	9
81	F6VCI2;F6VP19;A2A690;A2A690-2	F6VCI2;F6VP19;A2A690;A2A690-2	Protein TANC2	Tanc2	tr|F6VCI2|F6VCI2_MOUSE Protein TANC2 (Fragment) OS=Mus musculus GN=Tanc2 PE=4 SV=1;tr|F6VP19|F6VP19_MOUSE Protein TANC2 (Fragment) OS=Mus musculus GN=Tanc2 PE=1 SV=1;sp|A2A690|TANC2_MOUSE Protein TANC2 OS=Mus musculus GN=Tanc2 PE=1 SV=1;sp|A2A690-2|TANC2_M	20083000	13800000	13388000	2251000	956310	657130	637510	37511000	34561000	30234000	1	1	1	3.8	3.8	3.8	40.429	0	4.7718	47270000	4	1	1	1	1	1	1	1	1	1	1	1	2
82	A2A6A1;A0PJ58	A2A6A1;A0PJ58	G patch domain-containing protein 8	Gpatch8	sp|A2A6A1|GPTC8_MOUSE G patch domain-containing protein 8 OS=Mus musculus GN=Gpatch8 PE=1 SV=1;tr|A0PJ58|A0PJ58_MOUSE Gpatch8 protein (Fragment) OS=Mus musculus GN=Gpatch8 PE=2 SV=1	309570000	247410000	347560000	12563000	4299600	3436300	4827200	604470000	613260000	566100000	10	10	10	8.7	8.7	8.7	164.99	0	16.25	904550000	18	6	5	8	6	5	8	6	5	8	6	6	6
83	A2A6M1;Q9CZ28	A2A6M1;Q9CZ28	Vacuolar-sorting protein SNF8	Snf8	tr|A2A6M1|A2A6M1_MOUSE Vacuolar-sorting protein SNF8 OS=Mus musculus GN=Snf8 PE=4 SV=1;sp|Q9CZ28|SNF8_MOUSE Vacuolar-sorting protein SNF8 OS=Mus musculus GN=Snf8 PE=2 SV=1	0	0	166800000	20850000	0	0	20850000	0	0	182560000	2	2	2	12.9	12.9	12.9	25.968	0	6.028	166800000	2	1	1	2	1	1	2	1	1	2	0	0	2
84	A2A6P4;Q8BKU4;Q9CQP1;Q3TYF6;Q3TY58	A2A6P4;Q8BKU4;Q9CQP1;Q3TYF6;Q3TY58		Fam104a	tr|A2A6P4|A2A6P4_MOUSE Protein Fam104a OS=Mus musculus GN=Fam104a PE=4 SV=1;tr|Q8BKU4|Q8BKU4_MOUSE Putative uncharacterized protein (Fragment) OS=Mus musculus GN=Fam104a PE=2 SV=1;tr|Q9CQP1|Q9CQP1_MOUSE DNA segment, Chr 11, Wayne State University 99, expre	25543000	0	59653000	14199000	4257100	0	9942200	0	0	62953000	2	2	2	35.7	35.7	35.7	19.618	0	5.4791	85196000	3	1	0	1	1	0	1	1	0	1	2	0	1
85	A2A6Q5;A2A6Q5-2;A2A6Q5-3;Q3TTW1;Q3UYS3;Q8BYJ1;Q8R568	A2A6Q5;A2A6Q5-2;A2A6Q5-3;Q3TTW1	Cell division cycle protein 27 homolog	Cdc27	sp|A2A6Q5|CDC27_MOUSE Cell division cycle protein 27 homolog OS=Mus musculus GN=Cdc27 PE=1 SV=1;sp|A2A6Q5-2|CDC27_MOUSE Isoform 2 of Cell division cycle protein 27 homolog OS=Mus musculus GN=Cdc27;sp|A2A6Q5-3|CDC27_MOUSE Isoform 3 of Cell division cycle pr	380020000	335360000	419280000	27675000	9268700	8179600	10226000	533500000	525470000	584780000	14	14	14	25.5	25.5	25.5	91.841	0	28.674	1134700000	26	9	6	11	9	6	11	9	6	11	10	5	11
86	B2RWR4;B7ZMV4;A2A6T1	B2RWR4;B7ZMV4;A2A6T1	Cerebellar degeneration-related protein 2-like	Cdr2l	tr|B2RWR4|B2RWR4_MOUSE Cerebellar degeneration-related protein 2-like OS=Mus musculus GN=Cdr2l PE=2 SV=1;tr|B7ZMV4|B7ZMV4_MOUSE Cdr2l protein OS=Mus musculus GN=Cdr2l PE=2 SV=1;sp|A2A6T1|CDR2L_MOUSE Cerebellar degeneration-related protein 2-like OS=Mus mus	126180000	405560000	245590000	25075000	4070500	13083000	7922300	279540000	384640000	270120000	5	5	5	12.5	12.5	12.5	53.238	0	13.042	777340000	14	3	4	4	3	4	4	3	4	4	3	7	4
87	Q3TAX1;F8VQM4;A2A716	Q3TAX1;F8VQM4;A2A716	Oxysterol-binding protein	Osbpl7	tr|Q3TAX1|Q3TAX1_MOUSE Oxysterol-binding protein (Fragment) OS=Mus musculus GN=Osbpl7 PE=2 SV=1;tr|F8VQM4|F8VQM4_MOUSE Oxysterol-binding protein OS=Mus musculus GN=Osbpl7 PE=3 SV=1;tr|A2A716|A2A716_MOUSE Oxysterol-binding protein OS=Mus musculus GN=Osbpl7	62680000	46454000	24583000	2971500	1392900	1032300	546280	131210000	106290000	119190000	3	3	3	6.3	6.3	6.3	87.042	0	11.324	133720000	8	3	3	2	3	3	2	3	3	2	3	3	2
88	A2A791;A2A791-2;F6VYE2	A2A791;A2A791-2;F6VYE2	Zinc finger MYM-type protein 4	Zmym4	sp|A2A791|ZMYM4_MOUSE Zinc finger MYM-type protein 4 OS=Mus musculus GN=Zmym4 PE=2 SV=1;sp|A2A791-2|ZMYM4_MOUSE Isoform 2 of Zinc finger MYM-type protein 4 OS=Mus musculus GN=Zmym4;tr|F6VYE2|F6VYE2_MOUSE Zinc finger MYM-type protein 4 (Fragment) OS=Mus mus	764920000	575500000	606920000	23462000	9215800	6933700	7312300	1129900000	1140500000	1046800000	22	22	22	19.5	19.5	19.5	172.44	0	51.773	1947300000	53	19	13	13	19	13	13	19	13	13	18	17	18
89	A2A7A7;Q8CFX1;A2A7A8;Q8QZU3;Q3TFM8	A2A7A7;Q8CFX1	GDH/6PGL endoplasmic bifunctional protein;Glucose 1-dehydrogenase;6-phosphogluconolactonase	H6pd	tr|A2A7A7|A2A7A7_MOUSE GDH/6PGL endoplasmic bifunctional protein OS=Mus musculus GN=H6pd PE=1 SV=1;sp|Q8CFX1|G6PE_MOUSE GDH/6PGL endoplasmic bifunctional protein OS=Mus musculus GN=H6pd PE=1 SV=2	268780000	432290000	342200000	24840000	6399500	10293000	8147700	685560000	621620000	618390000	10	10	10	17.6	17.6	17.6	89.909	0	29.552	1043300000	19	6	7	6	6	7	6	6	7	6	5	7	7
90	B9EKQ3;A2A7B5;Q80VF3	B9EKQ3;A2A7B5;Q80VF3		Prdm2	tr|B9EKQ3|B9EKQ3_MOUSE Prdm2 protein OS=Mus musculus GN=Prdm2 PE=2 SV=1;tr|A2A7B5|A2A7B5_MOUSE Protein Prdm2 OS=Mus musculus GN=Prdm2 PE=1 SV=1;tr|Q80VF3|Q80VF3_MOUSE Prdm2 protein (Fragment) OS=Mus musculus GN=Prdm2 PE=2 SV=1	40650000	218560000	15240000	3154600	467250	2512200	175170	205360000	183860000	140770000	3	3	3	2.2	2.2	2.2	182.93	0	4.2607	274450000	6	2	2	2	2	2	2	2	2	2	2	2	2
91	E9Q532;A2A7F4;Q922U7;Q3V1H6;Q3TR19;A2A7F3;Q8BVB9	E9Q532;A2A7F4		Rlf	tr|E9Q532|E9Q532_MOUSE Insulin-like 3 OS=Mus musculus GN=Rlf PE=4 SV=1;tr|A2A7F4|A2A7F4_MOUSE Insulin-like 3 OS=Mus musculus GN=Rlf PE=4 SV=1	102880000	112820000	64157000	3144500	1156000	1267600	720860	115870000	130240000	196110000	8	8	8	6.9	6.9	6.9	206.28	0	11.18	279860000	13	5	5	5	5	5	5	5	5	5	5	5	3
92	Q5DU51;Q3UM91;A2A7F6;O35454;E9Q741;REV__E9QKX5;REV__Q80TY5	Q5DU51;Q3UM91;A2A7F6;O35454;E9Q741	Chloride channel protein;Chloride transport protein 6	mKIAA0046;Clcn6	tr|Q5DU51|Q5DU51_MOUSE MKIAA0046 protein (Fragment) OS=Mus musculus GN=mKIAA0046 PE=4 SV=1;tr|Q3UM91|Q3UM91_MOUSE Chloride channel 6 OS=Mus musculus GN=Clcn6 PE=2 SV=1;tr|A2A7F6|A2A7F6_MOUSE Chloride transport protein 6 OS=Mus musculus GN=Clcn6 PE=4 SV=1;s	137120000	131040000	167020000	12799000	4032900	3854300	4912300	276170000	256930000	388400000	4	4	4	6.6	6.6	6.6	77.139	0	10.897	435180000	13	4	4	4	4	4	4	4	4	4	4	5	4
93	Q497H7;F6Z4F8;Q3UDB2;A2A7F7;Q9WU20;Q3V399;F7BGN3	Q497H7;F6Z4F8;Q3UDB2;A2A7F7;Q9WU20;Q3V399;F7BGN3	Methylenetetrahydrofolate reductase	Mthfr	tr|Q497H7|Q497H7_MOUSE Mthfr protein (Fragment) OS=Mus musculus GN=Mthfr PE=2 SV=1;tr|F6Z4F8|F6Z4F8_MOUSE Methylenetetrahydrofolate reductase (Fragment) OS=Mus musculus GN=Mthfr PE=3 SV=1;tr|Q3UDB2|Q3UDB2_MOUSE Methylenetetrahydrofolate reductase OS=Mus mu	0	11833000	20711000	4067900	0	1479100	2588900	0	31419000	36358000	3	3	3	23.5	23.5	23.5	19.286	0	3.2912	32544000	5	0	2	3	0	2	3	0	2	3	0	2	3
94	A2A7G9;A2A7H1;Z4YN00;Q9QZN4;A2A7H3	A2A7G9;A2A7H1;Z4YN00;Q9QZN4	F-box only protein 6	Fbxo6	tr|A2A7G9|A2A7G9_MOUSE F-box only protein 6 (Fragment) OS=Mus musculus GN=Fbxo6 PE=4 SV=1;tr|A2A7H1|A2A7H1_MOUSE F-box only protein 6 (Fragment) OS=Mus musculus GN=Fbxo6 PE=4 SV=1;tr|Z4YN00|Z4YN00_MOUSE F-box only protein 6 (Fragment) OS=Mus musculus GN=Fb	265650000	162570000	136940000	33245000	15627000	9562700	8055600	389420000	316420000	237180000	3	3	3	19.7	19.7	19.7	26.59	0	8.9983	565160000	8	3	3	3	3	3	3	3	3	3	3	3	2
95	E9PUJ0;A2A7H4;G3UZT3;A2A7H5;G3UYF5;Q8BK26-2;Q8BK26;D6RHP0;G3UY69;F6UI76;A2A7H6	E9PUJ0;A2A7H4;G3UZT3;A2A7H5;G3UYF5;Q8BK26-2;Q8BK26;D6RHP0;G3UY69;F6UI76;A2A7H6	F-box only protein 44	Fbxo44	tr|E9PUJ0|E9PUJ0_MOUSE F-box only protein 44 OS=Mus musculus GN=Fbxo44 PE=4 SV=1;tr|A2A7H4|A2A7H4_MOUSE F-box only protein 44 (Fragment) OS=Mus musculus GN=Fbxo44 PE=4 SV=1;tr|G3UZT3|G3UZT3_MOUSE F-box only protein 44 (Fragment) OS=Mus musculus GN=Fbxo44 P	0	45226000	11200000	3526700	0	2826700	700010	0	87129000	51540000	2	2	2	9.6	9.6	9.6	25.446	0	3.5207	56427000	4	0	2	1	0	2	1	0	2	1	0	3	1
96	Q8C5M8;A2A7K5;Q9EQS3;Q3V1X1	Q8C5M8;A2A7K5;Q9EQS3;Q3V1X1	C-Myc-binding protein	Mycbp	tr|Q8C5M8|Q8C5M8_MOUSE Putative uncharacterized protein OS=Mus musculus GN=Mycbp PE=2 SV=1;tr|A2A7K5|A2A7K5_MOUSE C-Myc-binding protein OS=Mus musculus GN=Mycbp PE=4 SV=1;sp|Q9EQS3|MYCBP_MOUSE C-Myc-binding protein OS=Mus musculus GN=Mycbp PE=2 SV=5;tr|Q3V	260680000	212170000	324600000	113920000	37240000	30310000	46371000	365280000	530120000	478670000	4	4	4	51.5	51.5	51.5	11.998	0	16.979	797450000	15	3	3	3	3	3	3	3	3	3	5	4	6
97	A6PW84;A2A7Q5;Q3V1T4;Q3V1T4-2;Q3V1T4-3;F2Z499	A6PW84;A2A7Q5;Q3V1T4;Q3V1T4-2;Q3V1T4-3;F2Z499	Prolyl 3-hydroxylase 1	P3h1;Lepre1	tr|A6PW84|A6PW84_MOUSE Prolyl 3-hydroxylase 1 OS=Mus musculus GN=Lepre1 PE=4 SV=1;tr|A2A7Q5|A2A7Q5_MOUSE Prolyl 3-hydroxylase 1 OS=Mus musculus GN=Lepre1 PE=4 SV=1;sp|Q3V1T4|P3H1_MOUSE Prolyl 3-hydroxylase 1 OS=Mus musculus GN=Lepre1 PE=2 SV=2;sp|Q3V1T4-2|	380910000	197200000	478250000	27799000	10024000	5189400	12585000	507890000	540310000	796590000	9	9	9	18.4	18.4	18.4	84.472	0	18.79	1056400000	20	6	4	7	6	4	7	6	4	7	7	4	9
98	A2A7T8;Q3TJB1;Q9D294;Q05CB3;Q6P214;Q3V1K4;Q8BQI6;Q6PG63;Q9D102;A2A7U0	A2A7T8;Q3TJB1;Q9D294;Q05CB3;Q6P214;Q3V1K4;Q8BQI6;Q6PG63		Zmym1	tr|A2A7T8|A2A7T8_MOUSE Protein Zmym1 OS=Mus musculus GN=Zmym1 PE=4 SV=1;tr|Q3TJB1|Q3TJB1_MOUSE Protein Zmym1 OS=Mus musculus GN=Zmym1 PE=2 SV=1;tr|Q9D294|Q9D294_MOUSE Putative uncharacterized protein OS=Mus musculus GN=Zmym1 PE=2 SV=1;tr|Q05CB3|Q05CB3_MOUS	79359000	60942000	50108000	3661700	1526100	1172000	963610	131270000	138550000	162500000	5	5	5	8.2	8.2	8.2	100.03	0	6.5779	190410000	7	3	3	3	3	3	3	3	3	3	2	2	3
99	C0KL25;A2A7Y5;A2A7Y5-2	C0KL25;A2A7Y5;A2A7Y5-2	Migration and invasion-inhibitory protein	Miip	tr|C0KL25|C0KL25_MOUSE Invasion inhibitory protein 45 OS=Mus musculus GN=Miip PE=2 SV=1;sp|A2A7Y5|MIIP_MOUSE Migration and invasion-inhibitory protein OS=Mus musculus GN=Miip PE=2 SV=1;sp|A2A7Y5-2|MIIP_MOUSE Isoform 2 of Migration and invasion-inhibitory p	0	0	0	0	0	0	0	0	0	0	1	1	1	5.9	5.9	5.9	42.828	0.0061841	1.5377	0	0	1	0	0	1	0	0	1	0	0	0	0	0
100	A2A7Z4;Q78IG7;Q9CQH7	A2A7Z4;Q78IG7;Q9CQH7	Transcription factor BTF3;Transcription factor BTF3 homolog 4	Btf3l4	tr|A2A7Z4|A2A7Z4_MOUSE Basic transcription factor 3-like 4 OS=Mus musculus GN=Btf3l4 PE=2 SV=1;tr|Q78IG7|Q78IG7_MOUSE Btf3l4 protein (Fragment) OS=Mus musculus GN=Btf3l4 PE=2 SV=1;sp|Q9CQH7|BT3L4_MOUSE Transcription factor BTF3 homolog 4 OS=Mus musculus GN	2141100000	1011100000	1461800000	461400000	214110000	101110000	146180000	2526300000	2357900000	2593900000	9	9	9	68.4	68.4	68.4	17.27	0	109.72	4614000000	38	8	7	6	8	7	6	8	7	6	16	11	11
101	A2A841;P48193-2;P48193;A2A842;A0A068WAZ7;A2A839;A2A838;A0A068WAQ5;A2AD32;Q3UH12;F7BUB8;Q3V048;F6S4K9;B6ZHC3;B6ZHC2;Q3U0G7;F7CR30	A2A841;P48193-2;P48193;A2A842;A0A068WAZ7;A2A839;A2A838;A0A068WAQ5;A2AD32;Q3UH12	Protein 4.1	Epb4.1;Epb41	tr|A2A841|A2A841_MOUSE Protein 4.1 OS=Mus musculus GN=Epb4.1 PE=1 SV=1;sp|P48193-2|41_MOUSE Isoform 2 of Protein 4.1 OS=Mus musculus GN=Epb41;sp|P48193|41_MOUSE Protein 4.1 OS=Mus musculus GN=Epb41 PE=1 SV=2;tr|A2A842|A2A842_MOUSE Protein 4.1 OS=Mus muscul	611890000	558690000	418800000	28898000	11125000	10158000	7614600	838570000	815930000	828410000	17	15	2	24.2	21.3	4	97.239	0	48.525	1589400000	40	12	14	12	10	12	10	2	2	1	13	15	12
102	A2A8E2;Q8BHG2;Q8BHG2-3;B7ZC72;B7ZC71;Q8BHG2-2;A2A8E4;D6REH4	A2A8E2;Q8BHG2;Q8BHG2-3;B7ZC72;B7ZC71;Q8BHG2-2	UPF0587 protein C1orf123 homolog	0610037L13Rik	tr|A2A8E2|A2A8E2_MOUSE Protein 0610037L13Rik OS=Mus musculus GN=0610037L13Rik PE=4 SV=1;sp|Q8BHG2|CA123_MOUSE UPF0587 protein C1orf123 homolog OS=Mus musculus PE=2 SV=1;sp|Q8BHG2-3|CA123_MOUSE Isoform 3 of UPF0587 protein C1orf123 homolog OS=Mus musculus;t	385660000	453320000	500960000	121810000	35060000	41211000	45542000	792800000	916910000	833730000	3	3	3	32.6	32.6	32.6	15.783	0	12.625	1339900000	14	3	3	3	3	3	3	3	3	3	5	4	5
103	A2A8L5;F6Y3V0;F6S1X8;Q4U1Z0;Q3V0J9;Q3V315	A2A8L5;F6Y3V0;F6S1X8	Receptor-type tyrosine-protein phosphatase F	Ptprf	sp|A2A8L5|PTPRF_MOUSE Receptor-type tyrosine-protein phosphatase F OS=Mus musculus GN=Ptprf PE=1 SV=1;tr|F6Y3V0|F6Y3V0_MOUSE Receptor-type tyrosine-protein phosphatase F (Fragment) OS=Mus musculus GN=Ptprf PE=4 SV=1;tr|F6S1X8|F6S1X8_MOUSE Receptor-type tyr	13916000	8578400	42905000	589180	125370	77283	386530	0	41081000	75402000	5	4	4	4.3	3.7	3.7	211.49	0.0003034	2.5758	65399000	5	2	2	4	1	1	3	1	1	3	1	1	3
104	A2A8L9;Q8BW72-2;Q8BW72	A2A8L9;Q8BW72-2;Q8BW72	Lysine-specific demethylase 4A	Kdm4a	tr|A2A8L9|A2A8L9_MOUSE Lysine-specific demethylase 4A OS=Mus musculus GN=Kdm4a PE=4 SV=1;sp|Q8BW72-2|KDM4A_MOUSE Isoform 2 of Lysine-specific demethylase 4A OS=Mus musculus GN=Kdm4a;sp|Q8BW72|KDM4A_MOUSE Lysine-specific demethylase 4A OS=Mus musculus GN=Kd	10238000	25540000	0	777780	222570	555210	0	0	68740000	0	2	2	2	2.6	2.6	2.6	115.97	0	3.8602	35778000	1	1	1	0	1	1	0	1	1	0	0	1	0
105	E9Q2S4;A2A8M8	E9Q2S4;A2A8M8		Pramef6	tr|E9Q2S4|E9Q2S4_MOUSE Protein Pramef6 OS=Mus musculus GN=Pramef6 PE=4 SV=1;tr|A2A8M8|A2A8M8_MOUSE Protein Pramef6 OS=Mus musculus GN=Pramef6 PE=4 SV=1	0	170130000	112210000	9411100	0	5670900	3740200	0	339580000	451020000	1	1	1	3.2	3.2	3.2	53.659	1	-2	282330000	2	0	1	1	0	1	1	0	1	1	0	0	2
106	A8Y5G5;A2A8R0	A8Y5G5;A2A8R0		Zfyve9	tr|A8Y5G5|A8Y5G5_MOUSE Protein Zfyve9 OS=Mus musculus GN=Zfyve9 PE=4 SV=1;tr|A2A8R0|A2A8R0_MOUSE MCG17975 OS=Mus musculus GN=Zfyve9 PE=4 SV=1	28458000	73951000	69418000	2727400	451710	1173800	1101900	84532000	0	121710000	3	3	3	4.7	4.7	4.7	146.33	0.00015513	2.9071	171830000	4	1	1	2	1	1	2	1	1	2	1	1	2
107	A2A8R7;B2RX14;Q9EQN6;Q3V3D5;Q8BIZ5	A2A8R7;B2RX14	Terminal uridylyltransferase 4	Zcchc11	tr|A2A8R7|A2A8R7_MOUSE Terminal uridylyltransferase 4 OS=Mus musculus GN=Zcchc11 PE=1 SV=1;sp|B2RX14|TUT4_MOUSE Terminal uridylyltransferase 4 OS=Mus musculus GN=Zcchc11 PE=1 SV=2	267950000	294670000	85664000	6294100	2601500	2860900	831690	436050000	438530000	259350000	14	13	13	11.4	10.9	10.9	185.12	0	48.276	648290000	22	7	10	6	7	9	5	7	9	5	7	10	5
108	A2A8S2;A2A8S3;Q91VU1	A2A8S2;A2A8S3;Q91VU1	Protein YIPF;Protein YIPF1	Yipf1	tr|A2A8S2|A2A8S2_MOUSE Protein YIPF1 (Fragment) OS=Mus musculus GN=Yipf1 PE=4 SV=2;tr|A2A8S3|A2A8S3_MOUSE Protein YIPF1 (Fragment) OS=Mus musculus GN=Yipf1 PE=4 SV=1;sp|Q91VU1|YIPF1_MOUSE Protein YIPF1 OS=Mus musculus GN=Yipf1 PE=2 SV=1	71517000	67578000	61683000	33463000	11919000	11263000	10281000	98505000	128770000	111500000	2	2	2	7.8	7.8	7.8	27.434	0	3.0157	200780000	7	2	2	2	2	2	2	2	2	2	2	3	2
109	Q3TXY3;Q8C397;A2A8U2-2;A2A8U2-3;A2A8U2;Q8C9U2	Q3TXY3;Q8C397;A2A8U2-2;A2A8U2-3;A2A8U2	Transmembrane protein 201	Tmem201	tr|Q3TXY3|Q3TXY3_MOUSE Putative uncharacterized protein OS=Mus musculus GN=Tmem201 PE=2 SV=1;tr|Q8C397|Q8C397_MOUSE Putative uncharacterized protein OS=Mus musculus GN=Tmem201 PE=2 SV=1;sp|A2A8U2-2|TM201_MOUSE Isoform Samp1 of Transmembrane protein 201 OS=	165350000	194270000	94929000	34965000	12719000	14944000	7302200	279830000	280350000	253300000	3	3	3	12.6	12.6	12.6	39.269	0	10.881	454550000	12	3	3	3	3	3	3	3	3	3	4	5	3
110	E9QKA4;A2A8V8;A2A8V9;E9PUK6;Q52KI8-2;Q52KI8;A2A983;F7BWM1;F6T4M4;F6UK16	E9QKA4;A2A8V8;A2A8V9;E9PUK6;Q52KI8-2;Q52KI8	Serine/arginine repetitive matrix protein 1	Srrm1	tr|E9QKA4|E9QKA4_MOUSE Serine/arginine repetitive matrix protein 1 OS=Mus musculus GN=Srrm1 PE=1 SV=1;tr|A2A8V8|A2A8V8_MOUSE Serine/arginine repetitive matrix protein 1 OS=Mus musculus GN=Srrm1 PE=1 SV=1;tr|A2A8V9|A2A8V9_MOUSE Serine/arginine repetitive ma	1748400000	2159100000	1713300000	110210000	34282000	42335000	33595000	2587100000	2657700000	2465100000	9	9	9	12.4	12.4	12.4	101.16	0	28.472	5620900000	41	8	6	7	8	6	7	8	6	7	13	15	13
111	E9Q6C1;F6UHR6;E9PXZ2;A2A8Z1;Q5FWX7;Z4YJX3;A2A8Z1-2;Q8VDM5;Q8R0G3;Q99LZ2	E9Q6C1;F6UHR6;E9PXZ2;A2A8Z1;Q5FWX7;Z4YJX3;A2A8Z1-2;Q8VDM5;Q8R0G3	Oxysterol-binding protein;Oxysterol-binding protein-related protein 9	Osbpl9	tr|E9Q6C1|E9Q6C1_MOUSE Oxysterol-binding protein OS=Mus musculus GN=Osbpl9 PE=1 SV=1;tr|F6UHR6|F6UHR6_MOUSE Oxysterol-binding protein OS=Mus musculus GN=Osbpl9 PE=1 SV=2;tr|E9PXZ2|E9PXZ2_MOUSE Oxysterol-binding protein OS=Mus musculus GN=Osbpl9 PE=1 SV=2;s	640170000	476520000	309400000	50932000	22863000	17018000	11050000	922740000	797290000	789750000	9	9	9	20.6	20.6	20.6	73.903	0	44.064	1426100000	29	9	8	6	9	8	6	9	8	6	11	9	9
112	A2A934;A2A930;A2A931;A2A933;A2A935-2;A2A935;A2A935-3;Q8BQB3;Q8C763;G3UYY9;A4QPC8;G3UZ13;Q8CCA6;Q8BNF5;G3UWJ0;O35700;G3UYK2;G3UWT0;H9T841;G3UZT5;P14404	A2A934;A2A930;A2A931;A2A933;A2A935-2;A2A935;A2A935-3;Q8BQB3;Q8C763;G3UYY9;A4QPC8;G3UZ13;Q8CCA6;Q8BNF5;G3UWJ0;O35700;G3UYK2;G3UWT0;H9T841;G3UZT5;P14404	PR domain zinc finger protein 16;MDS1 and EVI1 complex locus protein EVI1	Prdm16;Mecom	tr|A2A934|A2A934_MOUSE PR domain zinc finger protein 16 OS=Mus musculus GN=Prdm16 PE=4 SV=1;tr|A2A930|A2A930_MOUSE PR domain zinc finger protein 16 OS=Mus musculus GN=Prdm16 PE=4 SV=1;tr|A2A931|A2A931_MOUSE PR domain zinc finger protein 16 OS=Mus musculus	833180000	16700000000	13884000000	551180000	14617000	292990000	243570000	14072000000	18596000000	30722000000	2	2	2	1.5	1.5	1.5	130.34	0.009159	1.3728	31417000000	9	1	1	2	1	1	2	1	1	2	2	4	3
113	Q6A071;A8Y5H7;Q99J07;Q9DBQ0;A2A9B9;Q8BXE6	Q6A071;A8Y5H7;Q99J07;Q9DBQ0;A2A9B9;Q8BXE6		Sec14l1	tr|Q6A071|Q6A071_MOUSE MKIAA4251 protein (Fragment) OS=Mus musculus GN=Sec14l1 PE=2 SV=1;tr|A8Y5H7|A8Y5H7_MOUSE Protein Sec14l1 OS=Mus musculus GN=Sec14l1 PE=4 SV=1;tr|Q99J07|Q99J07_MOUSE Protein Sec14l1 OS=Mus musculus GN=Sec14l1 PE=2 SV=1;tr|Q9DBQ0|Q9DBQ	30055000	0	14126000	1194100	812290	0	381790	39894000	0	0	2	2	2	4.9	4.9	4.9	71.293	0	4.7323	44181000	2	1	0	1	1	0	1	1	0	1	1	0	1
114	A2A9C3-2;A2A9C3;Q6ZQA5	A2A9C3-2;A2A9C3;Q6ZQA5	Protein SZT2	Szt2;mKIAA0467	sp|A2A9C3-2|SZT2_MOUSE Isoform 2 of Protein SZT2 OS=Mus musculus GN=Szt2;sp|A2A9C3|SZT2_MOUSE Protein SZT2 OS=Mus musculus GN=Szt2 PE=1 SV=1;tr|Q6ZQA5|Q6ZQA5_MOUSE MKIAA0467 protein (Fragment) OS=Mus musculus GN=mKIAA0467 PE=4 SV=2	2600400	0	28168000	185350	15665	0	169690	33705000	0	27189000	3	3	3	1.3	1.3	1.3	377.52	0	4.4011	30768000	3	1	0	3	1	0	3	1	0	3	1	0	2
115	A2A9F7;Q8VEJ1	A2A9F7;Q8VEJ1	GPN-loop GTPase 2	Gpn2	tr|A2A9F7|A2A9F7_MOUSE GPN-loop GTPase 2 OS=Mus musculus GN=Gpn2 PE=4 SV=1;sp|Q8VEJ1|GPN2_MOUSE GPN-loop GTPase 2 OS=Mus musculus GN=Gpn2 PE=2 SV=2	32636000	31187000	39262000	8590500	2719700	2598900	3271800	83892000	101440000	123130000	2	2	2	11.5	11.5	11.5	31.814	0	7.0138	103090000	4	1	1	2	1	1	2	1	1	2	1	1	2
116	A2A9I0;O35166	A2A9I0;O35166	Golgi SNAP receptor complex member 2	Gosr2	tr|A2A9I0|A2A9I0_MOUSE Golgi SNAP receptor complex member 2 OS=Mus musculus GN=Gosr2 PE=4 SV=1;sp|O35166|GOSR2_MOUSE Golgi SNAP receptor complex member 2 OS=Mus musculus GN=Gosr2 PE=2 SV=2	142470000	61718000	165330000	41057000	15830000	6857500	18370000	191650000	189420000	231060000	5	5	5	40.6	40.6	40.6	19.571	0	66.851	369520000	11	4	2	4	4	2	4	4	2	4	4	2	5
117	Q8C1L6;A2A9K3;Q8BMK0	Q8C1L6;A2A9K3;Q8BMK0	Centrosomal protein of 85 kDa	Cep85	tr|Q8C1L6|Q8C1L6_MOUSE Centrosomal protein of 85 kDa OS=Mus musculus GN=Cep85 PE=2 SV=1;tr|A2A9K3|A2A9K3_MOUSE Centrosomal protein of 85 kDa OS=Mus musculus GN=Cep85 PE=4 SV=1;sp|Q8BMK0|CEP85_MOUSE Centrosomal protein of 85 kDa OS=Mus musculus GN=Cep85 PE=	11176000	22215000	23733000	14281000	2793900	5553700	5933300	33677000	43546000	42479000	1	1	1	23.4	23.4	23.4	8.2249	0.0060538	1.5654	57124000	3	1	1	1	1	1	1	1	1	1	1	1	1
118	E9PX48;A2A9M5;Q8R1A4-2;Q8R1A4;A2A9M4;Q3U806;Q7TPP0;F6ZJ55;A2AW79;Q8VDR9-2	E9PX48;A2A9M5;Q8R1A4-2;Q8R1A4	Dedicator of cytokinesis protein 7	Dock7	tr|E9PX48|E9PX48_MOUSE Dedicator of cytokinesis protein 7 OS=Mus musculus GN=Dock7 PE=1 SV=1;tr|A2A9M5|A2A9M5_MOUSE Dedicator of cytokinesis protein 7 OS=Mus musculus GN=Dock7 PE=1 SV=1;sp|Q8R1A4-2|DOCK7_MOUSE Isoform 2 of Dedicator of cytokinesis protein	9018700000	8011500000	5150300000	184840000	75155000	66762000	42920000	13383000000	12940000000	12081000000	64	64	60	41.6	41.6	39.6	238.09	0	279.34	22180000000	225	55	54	49	55	54	49	51	50	46	79	72	74
119	A2A9Q2;Q8BHG1;Q8R320;A6PWC3;Q8CIJ0;Q8R1H1;Q3V3G9;Q9Z153	A2A9Q2;Q8BHG1;Q8R320;A6PWC3;Q8CIJ0;Q8R1H1	Nardilysin	Nrd1	tr|A2A9Q2|A2A9Q2_MOUSE Nardilysin OS=Mus musculus GN=Nrd1 PE=1 SV=1;sp|Q8BHG1|NRDC_MOUSE Nardilysin OS=Mus musculus GN=Nrd1 PE=1 SV=1;tr|Q8R320|Q8R320_MOUSE Nardilysin, N-arginine dibasic convertase, NRD convertase 1 OS=Mus musculus GN=Nrd1 PE=2 SV=1;tr|A6	5707600000	4918100000	5203000000	243520000	87809000	75663000	80046000	8130900000	8714200000	7569200000	38	38	38	43	43	43	140.62	0	198.62	15829000000	167	34	31	35	34	31	35	34	31	35	58	52	57
120	A2A9W3;Q3UBZ5;A2A9W1;Q8BTE1;Q3UBZ5-2	A2A9W3;Q3UBZ5;A2A9W1;Q8BTE1	MIF4G domain-containing protein	Mif4gd	tr|A2A9W3|A2A9W3_MOUSE MIF4G domain-containing protein OS=Mus musculus GN=Mif4gd PE=4 SV=1;sp|Q3UBZ5|MI4GD_MOUSE MIF4G domain-containing protein OS=Mus musculus GN=Mif4gd PE=2 SV=1;tr|A2A9W1|A2A9W1_MOUSE MIF4G domain-containing protein (Fragment) OS=Mus mu	95847000	22276000	42488000	10707000	6389800	1485000	2832500	94679000	90052000	101110000	3	3	3	21.7	21.7	21.7	23.311	0	5.9901	160610000	8	1	3	3	1	3	3	1	3	3	2	3	3
121	A2A9W7;Q8BMI3;S4R2D2	A2A9W7;Q8BMI3;S4R2D2	ADP-ribosylation factor-binding protein GGA3	Gga3	tr|A2A9W7|A2A9W7_MOUSE ADP-ribosylation factor-binding protein GGA3 OS=Mus musculus GN=Gga3 PE=4 SV=1;sp|Q8BMI3|GGA3_MOUSE ADP-ribosylation factor-binding protein GGA3 OS=Mus musculus GN=Gga3 PE=2 SV=2;tr|S4R2D2|S4R2D2_MOUSE ADP-ribosylation factor-binding	233790000	107510000	108450000	14992000	7793100	3583500	3614900	234910000	246980000	225560000	7	7	7	18.3	18.3	18.3	70.192	0	11.614	449750000	14	6	4	3	6	4	3	6	4	3	7	4	3
122	A2AA59;Q6ZQF7-2;Q6ZQF7	A2AA59;Q6ZQF7-2;Q6ZQF7	Protein Jade-2	Jade2	tr|A2AA59|A2AA59_MOUSE Protein Jade-2 OS=Mus musculus GN=Jade2 PE=1 SV=1;sp|Q6ZQF7-2|JADE2_MOUSE Isoform 2 of Protein Jade-2 OS=Mus musculus GN=Jade2;sp|Q6ZQF7|JADE2_MOUSE Protein Jade-2 OS=Mus musculus GN=Jade2 PE=1 SV=2	11388000	0	0	345100	345100	0	0	25851000	0	0	2	1	1	4.3	1.9	1.9	65.393	0.0088877	1.3862	11388000	1	2	1	1	1	0	0	1	0	0	1	0	0
123	A2AA85;Q6NXN1-2;Q6NXN1	A2AA85;Q6NXN1-2;Q6NXN1	SUZ domain-containing protein 1	Szrd1	tr|A2AA85|A2AA85_MOUSE SUZ domain-containing protein 1 (Fragment) OS=Mus musculus GN=Szrd1 PE=1 SV=1;sp|Q6NXN1-2|SZRD1_MOUSE Isoform 2 of SUZ domain-containing protein 1 OS=Mus musculus GN=Szrd1;sp|Q6NXN1|SZRD1_MOUSE SUZ domain-containing protein 1 OS=Mus	11211000	10744000	46239000	7577100	1245600	1193800	5137700	20939000	26908000	0	3	3	3	38.4	38.4	38.4	16.277	0	7.1672	68194000	2	2	1	2	2	1	2	2	1	2	0	1	1
124	Q542L0;Q3TIP4;Q69ZS4;A2AAN0;Q3USE0;O35250-2;O35250;Q7TPT3;A2AAN3;A2AAN4	Q542L0;Q3TIP4;Q69ZS4;A2AAN0;Q3USE0;O35250-2;O35250;Q7TPT3;A2AAN3	Exocyst complex component 7	Exoc7;mKIAA1067	tr|Q542L0|Q542L0_MOUSE Exocyst complex component 7, isoform CRA_a OS=Mus musculus GN=Exoc7 PE=2 SV=1;tr|Q3TIP4|Q3TIP4_MOUSE Putative uncharacterized protein OS=Mus musculus GN=Exoc7 PE=2 SV=1;tr|Q69ZS4|Q69ZS4_MOUSE MKIAA1067 protein (Fragment) OS=Mus muscu	752900000	702970000	516980000	51917000	19813000	18499000	13605000	1342500000	1153300000	1286400000	16	16	16	32.2	32.2	32.2	75.158	0	46.123	1972900000	40	12	13	11	12	13	11	12	13	11	14	14	12
125	A2AAY5;B9EJ37;Q3TDV5;Q8BY34;Q571L4;Q5DTZ1	A2AAY5;B9EJ37	SH3 and PX domain-containing protein 2B	Sh3pxd2b	sp|A2AAY5|SPD2B_MOUSE SH3 and PX domain-containing protein 2B OS=Mus musculus GN=Sh3pxd2b PE=1 SV=1;tr|B9EJ37|B9EJ37_MOUSE SH3 and PX domains 2B OS=Mus musculus GN=Sh3pxd2b PE=2 SV=1	4349600000	4008600000	4180200000	219970000	76309000	70326000	73337000	6410300000	6319700000	6028900000	29	29	27	42.8	42.8	40.9	101.52	0	177.65	12538000000	119	22	21	22	22	21	22	20	19	20	36	41	42
126	A2ABV5;A2BDP0;A2ABV5-2;A2BDN7;A2ABV5-3;A2ABV5-4	A2ABV5;A2BDP0	Mediator of RNA polymerase II transcription subunit 14	Med14	sp|A2ABV5|MED14_MOUSE Mediator of RNA polymerase II transcription subunit 14 OS=Mus musculus GN=Med14 PE=1 SV=1;tr|A2BDP0|A2BDP0_MOUSE Mediator of RNA polymerase II transcription subunit 14 OS=Mus musculus GN=Med14 PE=4 SV=1	416300000	443220000	362020000	16073000	5477700	5831800	4763400	923160000	842570000	893670000	17	17	17	20.4	20.4	20.4	160.96	0	37.139	1221500000	38	11	10	13	11	10	13	11	10	13	13	13	12
127	Q3TLU0;A2ABY3;Q540F5;Q3USD5;Q922E4;Q9CTB5	Q3TLU0;A2ABY3;Q540F5;Q3USD5;Q922E4	Ethanolamine-phosphate cytidylyltransferase	Pcyt2	tr|Q3TLU0|Q3TLU0_MOUSE Putative uncharacterized protein OS=Mus musculus GN=Pcyt2 PE=2 SV=1;tr|A2ABY3|A2ABY3_MOUSE Ethanolamine-phosphate cytidylyltransferase OS=Mus musculus GN=Pcyt2 PE=4 SV=1;tr|Q540F5|Q540F5_MOUSE CTP:ethanolaminephosphate cytidylyltrans	40294000	42745000	32554000	4445900	1549800	1644000	1252100	66439000	54341000	81395000	3	3	3	7.5	7.5	7.5	43.46	0	4.6598	115590000	5	2	3	2	2	3	2	2	3	2	2	2	1
128	A2AC19;O54864-3;O54864;O54864-2	A2AC19;O54864-3;O54864;O54864-2	Histone-lysine N-methyltransferase SUV39H1	Suv39h1	tr|A2AC19|A2AC19_MOUSE Histone-lysine N-methyltransferase SUV39H1 OS=Mus musculus GN=Suv39h1 PE=1 SV=1;sp|O54864-3|SUV91_MOUSE Isoform 3 of Histone-lysine N-methyltransferase SUV39H1 OS=Mus musculus GN=Suv39h1;sp|O54864|SUV91_MOUSE Histone-lysine N-methylt	22120000	59207000	70503000	7591500	1106000	2960300	3525200	82044000	119840000	139480000	3	3	3	13.6	13.6	13.6	47.767	0	3.5061	151830000	7	2	2	3	2	2	3	2	2	3	2	2	3
129	F8WHN4;A2ACC6;E9Q0J2;Q8BQZ4;B2RRF1;A2ACC7;Q8BQZ4-2	F8WHN4;A2ACC6;E9Q0J2;Q8BQZ4;B2RRF1;A2ACC7;Q8BQZ4-2	Ral GTPase-activating protein subunit beta	Ralgapb	tr|F8WHN4|F8WHN4_MOUSE Ral GTPase-activating protein subunit beta OS=Mus musculus GN=Ralgapb PE=4 SV=1;tr|A2ACC6|A2ACC6_MOUSE Ral GTPase-activating protein subunit beta OS=Mus musculus GN=Ralgapb PE=4 SV=1;tr|E9Q0J2|E9Q0J2_MOUSE Ral GTPase-activating prote	245060000	262000000	176530000	8236100	2952600	3156700	2126900	442310000	459730000	482900000	9	9	9	11	11	11	166.17	0	34.765	683600000	18	5	8	4	5	8	4	5	8	4	6	8	4
130	Q61833;A2ACG7;Q3U505;Q9DBG6	Q61833;A2ACG7;Q3U505;Q9DBG6	Dolichyl-diphosphooligosaccharide--protein glycosyltransferase subunit 2	Rpn2	tr|Q61833|Q61833_MOUSE Ribophorin OS=Mus musculus GN=Rpn2 PE=2 SV=1;tr|A2ACG7|A2ACG7_MOUSE Dolichyl-diphosphooligosaccharide--protein glycosyltransferase subunit 2 OS=Mus musculus GN=Rpn2 PE=4 SV=1;tr|Q3U505|Q3U505_MOUSE Putative uncharacterized protein (F	34433000000	31565000000	30467000000	3326400000	1187300000	1088400000	1050600000	48561000000	46229000000	43783000000	25	25	25	56.3	56.3	56.3	66.301	0	323.31	96464000000	255	24	23	22	24	23	22	24	23	22	84	79	92
131	A4FUW1;A2ACM0;Q8K4Q0;Q8K4Q0-2;E9PXZ5;Q8K4Q0-3;Q6ZPU3;Q8K4Q0-4;F6U5L3;F7BQS0;F7CN67;Q8K4Q0-5;F7B6I3;A7MAY7	A4FUW1;A2ACM0;Q8K4Q0;Q8K4Q0-2	Regulatory-associated protein of mTOR	Rptor	tr|A4FUW1|A4FUW1_MOUSE 4932417H02Rik protein (Fragment) OS=Mus musculus GN=Rptor PE=2 SV=1;tr|A2ACM0|A2ACM0_MOUSE Regulatory-associated protein of mTOR OS=Mus musculus GN=Rptor PE=1 SV=1;sp|Q8K4Q0|RPTOR_MOUSE Regulatory-associated protein of mTOR OS=Mus mu	854090000	740730000	472400000	30400000	12560000	10893000	6947000	1129200000	1287800000	1209000000	15	15	15	16.4	16.4	16.4	149.24	0	56.579	2067200000	37	13	13	9	13	13	9	13	13	9	14	13	10
132	A2ACQ1;Q8K1G9;A2ACP9	A2ACQ1;Q8K1G9		Dhx35	tr|A2ACQ1|A2ACQ1_MOUSE Protein Dhx35 OS=Mus musculus GN=Dhx35 PE=4 SV=1;tr|Q8K1G9|Q8K1G9_MOUSE DEAH (Asp-Glu-Ala-His) box polypeptide 35 OS=Mus musculus GN=Dhx35 PE=2 SV=1	64321000	53700000	109750000	6326900	1786700	1491700	3048500	141010000	150020000	166820000	5	5	5	10.2	10.2	10.2	78.739	0	7.4014	227770000	12	4	3	4	4	3	4	4	3	4	5	3	4
133	A2ACV6;E1U8D0;Q69ZW6;Q8CBB8;Q8CD47	A2ACV6;E1U8D0;Q69ZW6	Protein SOGA1;N-terminal form;C-terminal 80 kDa form	Soga1	tr|A2ACV6|A2ACV6_MOUSE Protein SOGA1 OS=Mus musculus GN=Soga1 PE=4 SV=1;sp|E1U8D0|SOGA1_MOUSE Protein SOGA1 OS=Mus musculus GN=Soga1 PE=1 SV=3;tr|Q69ZW6|Q69ZW6_MOUSE MKIAA0889 protein (Fragment) OS=Mus musculus GN=Soga1 PE=2 SV=1	416220000	350940000	366840000	10035000	3683400	3105700	3246400	660920000	594360000	624610000	26	25	25	22	21.6	21.6	183.14	0	50.832	1134000000	41	17	14	14	16	13	13	16	13	13	14	14	13
134	A2AD03;Q8CBI2;Q9QXG2;Q3UR39;Q9CS14	A2AD03;Q8CBI2;Q9QXG2;Q3UR39	Rab proteins geranylgeranyltransferase component A 1	Chm	tr|A2AD03|A2AD03_MOUSE Rab proteins geranylgeranyltransferase component A 1 OS=Mus musculus GN=Chm PE=4 SV=1;tr|Q8CBI2|Q8CBI2_MOUSE Putative uncharacterized protein OS=Mus musculus GN=Chm PE=2 SV=1;sp|Q9QXG2|RAE1_MOUSE Rab proteins geranylgeranyltransferas	365730000	525900000	704560000	49881000	11429000	16434000	22017000	844800000	952040000	822810000	14	14	13	37.6	37.6	36.4	73.663	0	46.053	1596200000	25	8	8	9	8	8	9	7	7	8	8	8	9
135	B7ZNX3;B2RUI9;A2AD39;Q60988;D6RH61;F6WX10;Q8BQI9;F6VXM5	B7ZNX3;B2RUI9;A2AD39;Q60988;D6RH61;F6WX10;Q8BQI9	SCL-interrupting locus protein homolog	Stil	tr|B7ZNX3|B7ZNX3_MOUSE Stil protein OS=Mus musculus GN=Stil PE=2 SV=1;tr|B2RUI9|B2RUI9_MOUSE Scl/Tal1 interrupting locus OS=Mus musculus GN=Stil PE=2 SV=1;tr|A2AD39|A2AD39_MOUSE SCL-interrupting locus protein homolog OS=Mus musculus GN=Stil PE=4 SV=1;sp|Q6	48276000	68228000	54140000	2666300	754320	1066100	845940	107230000	104440000	151590000	5	5	5	5.6	5.6	5.6	138.62	0	7.4891	170640000	8	2	3	5	2	3	5	2	3	5	2	2	4
136	A2AD97;Q9DBV4	A2AD97;Q9DBV4	Matrix-remodeling-associated protein 8	Mxra8	tr|A2AD97|A2AD97_MOUSE Matrix-remodeling-associated protein 8 (Fragment) OS=Mus musculus GN=Mxra8 PE=4 SV=2;sp|Q9DBV4|MXRA8_MOUSE Matrix-remodeling-associated protein 8 OS=Mus musculus GN=Mxra8 PE=2 SV=1	98334000	29067000	0	6370100	4916700	1453300	0	111820000	0	0	3	3	3	12.2	12.2	12.2	34.987	0	7.0963	127400000	2	3	2	0	3	2	0	3	2	0	1	1	0
137	A2ADA5;A2ADA5-2;A2ADA5-3	A2ADA5;A2ADA5-2	tRNA pseudouridine synthase-like 1	Pusl1	sp|A2ADA5|PUSL1_MOUSE tRNA pseudouridine synthase-like 1 OS=Mus musculus GN=Pusl1 PE=2 SV=1;sp|A2ADA5-2|PUSL1_MOUSE Isoform 2 of tRNA pseudouridine synthase-like 1 OS=Mus musculus GN=Pusl1	313380000	221460000	712800000	83176000	20892000	14764000	47520000	716870000	824480000	1078600000	7	7	7	30.6	30.6	30.6	31.992	0	18.34	1247600000	17	5	3	4	5	3	4	5	3	4	8	4	5
138	A2ADA6;Q6NXL5;Q3UH98;Q4QQN0;Q8C8T5	A2ADA6;Q6NXL5;Q3UH98;Q4QQN0		Acap3	tr|A2ADA6|A2ADA6_MOUSE Protein Acap3 OS=Mus musculus GN=Acap3 PE=4 SV=1;tr|Q6NXL5|Q6NXL5_MOUSE ArfGAP with coiled-coil, ankyrin repeat and PH domains 3 OS=Mus musculus GN=Acap3 PE=2 SV=1;tr|Q3UH98|Q3UH98_MOUSE Putative uncharacterized protein OS=Mus muscul	22310000	21474000	18032000	1404900	507050	488050	409810	0	22410000	19029000	4	3	3	8.2	7	7	92.333	0	3.1372	61816000	2	3	2	2	2	1	1	2	1	1	1	1	0
139	A2ADB1;A2ADB0;Q62504-3;Q62504-2;Q62504;Q3UV27	A2ADB1;A2ADB0;Q62504-3;Q62504-2;Q62504	Msx2-interacting protein	Spen	tr|A2ADB1|A2ADB1_MOUSE Msx2-interacting protein OS=Mus musculus GN=Spen PE=1 SV=1;tr|A2ADB0|A2ADB0_MOUSE Msx2-interacting protein OS=Mus musculus GN=Spen PE=1 SV=1;sp|Q62504-3|MINT_MOUSE Isoform 3 of Msx2-interacting protein OS=Mus musculus GN=Spen;sp|Q625	138990000	169310000	99844000	2051000	698440	850790	501730	412230000	233180000	254200000	12	12	12	6.1	6.1	6.1	395.98	0	11.758	408140000	17	4	8	6	4	8	6	4	8	6	4	7	6
140	A2ADE0;Z4YJW6;Q80TQ5;Q80TQ5-2;Q80TQ5-3	A2ADE0;Z4YJW6;Q80TQ5;Q80TQ5-2	Pleckstrin homology domain-containing family M member 2	Plekhm2	tr|A2ADE0|A2ADE0_MOUSE Pleckstrin homology domain-containing family M member 2 OS=Mus musculus GN=Plekhm2 PE=4 SV=1;tr|Z4YJW6|Z4YJW6_MOUSE Pleckstrin homology domain-containing family M member 2 OS=Mus musculus GN=Plekhm2 PE=4 SV=1;sp|Q80TQ5|PKHM2_MOUSE Pl	106730000	103570000	1466200000	38102000	2425600	2353800	33323000	1208600000	1130700000	1270100000	4	4	4	4.4	4.4	4.4	112.15	0	12.645	1676500000	16	3	4	4	3	4	4	3	4	4	5	5	6
141	F6WHL0;A2ADH1;Q9CQY5;F6TBV1;Q9CQY5-2;Q9CQY5-3	F6WHL0;A2ADH1;Q9CQY5;F6TBV1;Q9CQY5-2;Q9CQY5-3	Magnesium transporter protein 1	Magt1	tr|F6WHL0|F6WHL0_MOUSE Magnesium transporter protein 1 (Fragment) OS=Mus musculus GN=Magt1 PE=4 SV=1;tr|A2ADH1|A2ADH1_MOUSE Magnesium transporter protein 1 OS=Mus musculus GN=Magt1 PE=4 SV=1;sp|Q9CQY5|MAGT1_MOUSE Magnesium transporter protein 1 OS=Mus musc	820280000	706180000	489130000	111980000	45571000	39232000	27174000	1024300000	1114400000	925480000	7	7	7	18.1	18.1	18.1	38.839	0	32.847	2015600000	22	7	6	4	7	6	4	7	6	4	9	7	6
142	A2ADL9;Q63ZW7;A2ADS6;Q63ZW7-4;Q63ZW7-3;Q63ZW7-2;A2ADS8;Q3UGL9;Q63ZW7-5;Q63ZW7-6	A2ADL9;Q63ZW7;A2ADS6;Q63ZW7-4;Q63ZW7-3;Q63ZW7-2	InaD-like protein	Inadl	tr|A2ADL9|A2ADL9_MOUSE InaD-like (Drosophila) OS=Mus musculus GN=Inadl PE=2 SV=1;sp|Q63ZW7|INADL_MOUSE InaD-like protein OS=Mus musculus GN=Inadl PE=1 SV=2;tr|A2ADS6|A2ADS6_MOUSE InaD-like protein OS=Mus musculus GN=Inadl PE=1 SV=1;sp|Q63ZW7-4|INADL_MOUSE	0	18619000	0	189990	0	189990	0	0	46630000	0	3	2	2	2.7	2.2	2.2	198.51	1	-2	18619000	1	0	3	0	0	2	0	0	2	0	0	1	0
143	A2ADR8;Q8R3G1	A2ADR8;Q8R3G1	Nuclear inhibitor of protein phosphatase 1	Ppp1r8	tr|A2ADR8|A2ADR8_MOUSE Nuclear inhibitor of protein phosphatase 1 OS=Mus musculus GN=Ppp1r8 PE=4 SV=1;sp|Q8R3G1|PP1R8_MOUSE Nuclear inhibitor of protein phosphatase 1 OS=Mus musculus GN=Ppp1r8 PE=1 SV=1	2057700000	2186400000	1841100000	357950000	121040000	128610000	108300000	3283800000	2998200000	3062500000	13	13	13	52.9	52.9	52.9	38.399	0	95.983	6085100000	48	9	9	9	9	9	9	9	9	9	15	19	14
144	A2ADY9	A2ADY9	Protein DDI1 homolog 2	Ddi2	sp|A2ADY9|DDI2_MOUSE Protein DDI1 homolog 2 OS=Mus musculus GN=Ddi2 PE=1 SV=1	2085600000	2173800000	1387400000	225870000	83422000	86952000	55496000	3150200000	2864500000	2829000000	13	13	13	48.4	48.4	48.4	44.59	0	76.854	5646700000	49	10	12	10	10	12	10	10	12	10	13	20	16
145	A2AE27;Q9DBT5	A2AE27;Q9DBT5	AMP deaminase 2	Ampd2	tr|A2AE27|A2AE27_MOUSE AMP deaminase 2 OS=Mus musculus GN=Ampd2 PE=1 SV=1;sp|Q9DBT5|AMPD2_MOUSE AMP deaminase 2 OS=Mus musculus GN=Ampd2 PE=1 SV=1	1197600000	1158400000	563120000	64868000	26613000	25741000	12514000	1305700000	1477500000	1390600000	19	18	18	24.9	23.8	23.8	94.695	0	32.287	2919100000	38	14	12	11	13	11	11	13	11	11	16	12	10
146	A2AE98;Q80ZK9;Q8JZZ2	A2AE98;Q80ZK9	WD and tetratricopeptide repeats protein 1	Wdtc1	tr|A2AE98|A2AE98_MOUSE WD and tetratricopeptide repeats protein 1 OS=Mus musculus GN=Wdtc1 PE=1 SV=1;sp|Q80ZK9|WDTC1_MOUSE WD and tetratricopeptide repeats protein 1 OS=Mus musculus GN=Wdtc1 PE=1 SV=1	41850000	36992000	0	2130800	1131100	999770	0	59341000	62333000	0	3	3	3	6.2	6.2	6.2	68.997	0	4.1425	78841000	5	3	3	0	3	3	0	3	3	0	3	2	0
147	A2AEG6;Q3US81;A2AEG3;P35803-8;P35803;H3BIV8;P35803-4;P35803-3;P35803-2;Q3V0Z9;P35803-7;P35803-6;P35803-5	A2AEG6;Q3US81;A2AEG3;P35803-8;P35803;H3BIV8;P35803-4;P35803-3;P35803-2	Neuronal membrane glycoprotein M6-b	Gpm6b	tr|A2AEG6|A2AEG6_MOUSE Glycoprotein m6b, isoform CRA_g OS=Mus musculus GN=Gpm6b PE=1 SV=1;tr|Q3US81|Q3US81_MOUSE Glycoprotein m6b, isoform CRA_f OS=Mus musculus GN=Gpm6b PE=2 SV=1;tr|A2AEG3|A2AEG3_MOUSE Glycoprotein m6b, isoform CRA_a OS=Mus musculus GN=Gp	683060000	779590000	814570000	189770000	56922000	64966000	67881000	964650000	976360000	1169900000	4	4	4	17.7	17.7	17.7	36.196	0	7.3986	2277200000	13	2	3	4	2	3	4	2	3	4	4	5	4
148	A2AEM2;Q99LI2	A2AEM2;Q99LI2	Chloride channel CLIC-like protein 1	Clcc1	tr|A2AEM2|A2AEM2_MOUSE Chloride channel CLIC-like 1, isoform CRA_a OS=Mus musculus GN=Clcc1 PE=1 SV=1;sp|Q99LI2|CLCC1_MOUSE Chloride channel CLIC-like protein 1 OS=Mus musculus GN=Clcc1 PE=1 SV=1	566010000	333130000	440400000	39398000	16647000	9797800	12953000	560650000	533940000	523000000	13	13	13	38.2	38.2	38.2	61.239	0	35.433	1339500000	28	11	8	9	11	8	9	11	8	9	11	7	10
149	A2AER7;Q91VJ5;A2AER8;A2AER9	A2AER7;Q91VJ5;A2AER8;A2AER9	Polyglutamine-binding protein 1	Pqbp1	tr|A2AER7|A2AER7_MOUSE Pqbp1 protein OS=Mus musculus GN=Pqbp1 PE=2 SV=1;sp|Q91VJ5|PQBP1_MOUSE Polyglutamine-binding protein 1 OS=Mus musculus GN=Pqbp1 PE=1 SV=1;tr|A2AER8|A2AER8_MOUSE Polyglutamine-binding protein 1 (Fragment) OS=Mus musculus GN=Pqbp1 PE=4	247450000	250880000	295030000	79335000	24745000	25088000	29503000	419060000	413180000	382920000	6	6	6	42.2	42.2	42.2	30.597	0	16.852	793350000	15	4	4	5	4	4	5	4	4	5	5	4	6
150	Q3TDY8;A2AES3;A2AES5;A2AES4;Q3U2S4-2;Q3U2S4	Q3TDY8;A2AES3;A2AES5;A2AES4;Q3U2S4-2;Q3U2S4	OTU domain-containing protein 5	Otud5	tr|Q3TDY8|Q3TDY8_MOUSE Putative uncharacterized protein (Fragment) OS=Mus musculus GN=Otud5 PE=2 SV=1;tr|A2AES3|A2AES3_MOUSE OTU domain-containing protein 5 OS=Mus musculus GN=Otud5 PE=4 SV=1;tr|A2AES5|A2AES5_MOUSE OTU domain-containing protein 5 OS=Mus mu	0	9678500	0	372250	0	372250	0	0	19227000	0	1	1	1	2.3	2.3	2.3	55.86	0.0049787	1.7121	9678500	1	0	1	0	0	1	0	0	1	0	0	1	0
151	A2AEW0;Q3U1L5;A2AEW1;Q64092-3;Q64092-2;Q64092-4;Q64092	A2AEW0;Q3U1L5;A2AEW1;Q64092-3;Q64092-2;Q64092-4;Q64092	Transcription factor E3	Tfe3	tr|A2AEW0|A2AEW0_MOUSE Transcription factor E3 OS=Mus musculus GN=Tfe3 PE=4 SV=1;tr|Q3U1L5|Q3U1L5_MOUSE Putative uncharacterized protein (Fragment) OS=Mus musculus GN=Tfe3 PE=2 SV=1;tr|A2AEW1|A2AEW1_MOUSE Transcription factor E3 OS=Mus musculus GN=Tfe3 PE=	109020000	53467000	70232000	11082000	5191300	2546100	3344400	207570000	150730000	131150000	3	3	3	12.3	12.3	12.3	57.736	0	4.6298	232720000	8	2	1	2	2	1	2	2	1	2	3	2	3
152	A2AEW9;A2AEW8;Q8VD04;Q3TZ55;A2AEW6;Q3T9D9;A2AEW5	A2AEW9;A2AEW8;Q8VD04;Q3TZ55;A2AEW6;Q3T9D9;A2AEW5	GRIP1-associated protein 1	Gripap1	tr|A2AEW9|A2AEW9_MOUSE GRIP1-associated protein 1 OS=Mus musculus GN=Gripap1 PE=1 SV=1;tr|A2AEW8|A2AEW8_MOUSE GRIP1-associated protein 1 OS=Mus musculus GN=Gripap1 PE=1 SV=1;sp|Q8VD04|GRAP1_MOUSE GRIP1-associated protein 1 OS=Mus musculus GN=Gripap1 PE=1 S	566290000	704630000	538200000	32306000	10112000	12583000	9610800	666920000	781590000	765580000	14	14	14	25.1	25.1	25.1	90.764	0	65.816	1809100000	31	12	10	9	12	10	9	12	10	9	10	11	10
153	A2AEX8;A2AEX6;P97447;A2AEY1;A2AEY0;A2AEX9;Q9DAH0;Q8CDC8;Q6P8P1;O70403	A2AEX8;A2AEX6;P97447;A2AEY1	Four and a half LIM domains protein 1	Fhl1	tr|A2AEX8|A2AEX8_MOUSE Four and a half LIM domains 1, isoform CRA_b OS=Mus musculus GN=Fhl1 PE=1 SV=1;tr|A2AEX6|A2AEX6_MOUSE Four and a half LIM domains protein 1 OS=Mus musculus GN=Fhl1 PE=1 SV=1;sp|P97447|FHL1_MOUSE Four and a half LIM domains protein 1	12825000000	14035000000	13817000000	2140900000	675010000	738700000	727190000	19907000000	23472000000	24223000000	16	16	4	62.2	62.2	17.2	33.563	0	129.13	40677000000	135	14	14	15	14	14	15	3	4	4	40	45	50
154	A2AF81;Q8N9S3-3;Q8N9S3;F6S1R2;Q8N9S3-2	A2AF81;Q8N9S3-3;Q8N9S3;F6S1R2;Q8N9S3-2	Activator of 90 kDa heat shock protein ATPase homolog 2	Ahsa2	tr|A2AF81|A2AF81_MOUSE Activator of 90 kDa heat shock protein ATPase homolog 2 (Fragment) OS=Mus musculus GN=Ahsa2 PE=4 SV=1;sp|Q8N9S3-3|AHSA2_MOUSE Isoform 3 of Activator of 90 kDa heat shock protein ATPase homolog 2 OS=Mus musculus GN=Ahsa2;sp|Q8N9S3|AHS	104440000	0	0	6962500	6962500	0	0	138630000	0	0	2	1	1	8.5	5.5	5.5	22.402	0	8.2563	104440000	2	2	2	1	1	1	0	1	1	0	1	1	0
155	A2AFF6;O35638;Q3TG33;Q8BSB5;Q3UQG8;F6XLF4	A2AFF6;O35638	Cohesin subunit SA-2	Stag2	tr|A2AFF6|A2AFF6_MOUSE Cohesin subunit SA-2 OS=Mus musculus GN=Stag2 PE=1 SV=1;sp|O35638|STAG2_MOUSE Cohesin subunit SA-2 OS=Mus musculus GN=Stag2 PE=1 SV=3	2825100000	2846600000	2542100000	120790000	41545000	41862000	37384000	4762000000	4699900000	4642800000	35	35	31	37.7	37.7	34.8	145.7	0	99.917	8213800000	134	29	27	24	29	27	24	27	23	23	48	49	37
156	A2AFG7;A2AFG8;Q6PGJ3;P11627;Q9QYQ7;F6UIL7;B7ZCD3;Q684Q2	A2AFG7;A2AFG8;Q6PGJ3;P11627	Neural cell adhesion molecule L1	L1cam	tr|A2AFG7|A2AFG7_MOUSE Neural cell adhesion molecule L1 OS=Mus musculus GN=L1cam PE=4 SV=1;tr|A2AFG8|A2AFG8_MOUSE Neural cell adhesion molecule L1 OS=Mus musculus GN=L1cam PE=4 SV=1;tr|Q6PGJ3|Q6PGJ3_MOUSE L1 cell adhesion molecule OS=Mus musculus GN=L1cam	395800000	442780000	276310000	16640000	5907500	6608600	4124100	693510000	684560000	702480000	10	10	10	12.6	12.6	12.6	139.82	0	45.201	1114900000	27	6	9	7	6	9	7	6	9	7	9	11	7
157	A2AFM3;A2AFM4;Q68G58;Q68G58-2	A2AFM3;A2AFM4;Q68G58;Q68G58-2	DNA-(apurinic or apyrimidinic site) lyase 2	Apex2	tr|A2AFM3|A2AFM3_MOUSE Apurinic/apyrimidinic endonuclease 2, isoform CRA_a OS=Mus musculus GN=Apex2 PE=4 SV=1;tr|A2AFM4|A2AFM4_MOUSE DNA-(apurinic or apyrimidinic site) lyase 2 OS=Mus musculus GN=Apex2 PE=4 SV=1;sp|Q68G58|APEX2_MOUSE DNA-(apurinic or apyri	19567000	0	0	724700	724700	0	0	47795000	0	0	1	1	1	2.1	2.1	2.1	57.415	0.0099516	1.3149	19567000	1	1	0	0	1	0	0	1	0	0	1	0	0
158	Q4JG03;A2AFQ0;Q7TMY8;Q7TMY8-3;Q7TMY8-4;Q7TMY8-2;Q8BKX3;F6XP90;Q8C0G8;Q9CU76;F6UYC1;Q3TL29	Q4JG03;A2AFQ0;Q7TMY8;Q7TMY8-3;Q7TMY8-4;Q7TMY8-2	E3 ubiquitin-protein ligase HUWE1	Huwe1	tr|Q4JG03|Q4JG03_MOUSE Mcl-1 ubiquitin ligase OS=Mus musculus GN=Huwe1 PE=2 SV=1;tr|A2AFQ0|A2AFQ0_MOUSE E3 ubiquitin-protein ligase HUWE1 OS=Mus musculus GN=Huwe1 PE=1 SV=1;sp|Q7TMY8|HUWE1_MOUSE E3 ubiquitin-protein ligase HUWE1 OS=Mus musculus GN=Huwe1 PE	7296900000	6718900000	6446800000	99333000	35422000	32616000	31295000	12292000000	11744000000	11905000000	87	87	66	30.2	30.2	23.3	482.74	0	323.31	20463000000	299	70	66	62	70	66	62	52	50	45	101	101	97
159	Q9CYT3;Q99N15;A2AFQ2;O08756	Q9CYT3;Q99N15;A2AFQ2;O08756	3-hydroxyacyl-CoA dehydrogenase type-2	Hsd17b10	tr|Q9CYT3|Q9CYT3_MOUSE Putative uncharacterized protein OS=Mus musculus GN=Hsd17b10 PE=2 SV=1;tr|Q99N15|Q99N15_MOUSE 17beta-hydroxysteroid dehydrogenase type 10/short chain L-3-hydroxyacyl-CoA dehydrogenase OS=Mus musculus GN=Hsd17b10 PE=1 SV=1;tr|A2AFQ2|A	5526600000	6942700000	5264500000	1043200000	325100000	408400000	309680000	10516000000	12025000000	9950900000	16	16	16	77.4	77.4	77.4	27.273	0	156.2	17734000000	113	14	14	13	14	14	13	14	14	13	37	40	36
160	A2AFQ9;E9PUU4;Q8BX17;B2RQ83;B7ZN04;Q6KAS0;Q3TR97;F7CKD6	A2AFQ9;E9PUU4;Q8BX17;B2RQ83;B7ZN04;Q6KAS0;Q3TR97	Gem-associated protein 5	Gemin5	tr|A2AFQ9|A2AFQ9_MOUSE Gem-associated protein 5 OS=Mus musculus GN=Gemin5 PE=4 SV=1;tr|E9PUU4|E9PUU4_MOUSE Gem-associated protein 5 OS=Mus musculus GN=Gemin5 PE=4 SV=1;sp|Q8BX17|GEMI5_MOUSE Gem-associated protein 5 OS=Mus musculus GN=Gemin5 PE=2 SV=2;tr|B2	2724300000	3597900000	2854700000	99750000	29612000	39108000	31029000	4743400000	4772200000	4143000000	39	39	39	33.4	33.4	33.4	166.52	0	147.85	9177000000	121	27	29	31	27	29	31	27	29	31	38	42	41
161	O54817;A2AG22;O88933;Q9Z2U3	O54817;A2AG22;O88933;Q9Z2U3		Esx1	tr|O54817|O54817_MOUSE Paired-like homeodomain containing protein OS=Mus musculus GN=Esx1 PE=2 SV=1;tr|A2AG22|A2AG22_MOUSE Protein Esx1 OS=Mus musculus GN=Esx1 PE=4 SV=1;tr|O88933|O88933_MOUSE Homeobox protein SPX1 OS=Mus musculus GN=Esx1 PE=2 SV=1;tr|Q9Z2	126840000	63085000	0	17266000	11531000	5735000	0	235720000	129030000	0	2	2	2	8	8	8	35.968	0.0053794	1.6358	189930000	4	2	2	0	2	2	0	2	2	0	2	2	0
162	F6YPG3;A2AG36;Q562G0;B9EIU5;Q5DU55;Q9JJI6	F6YPG3;A2AG36;Q562G0;B9EIU5;Q5DU55;Q9JJI6	GPI ethanolamine phosphate transferase 3	Pigo	tr|F6YPG3|F6YPG3_MOUSE GPI ethanolamine phosphate transferase 3 (Fragment) OS=Mus musculus GN=Pigo PE=4 SV=1;tr|A2AG36|A2AG36_MOUSE GPI ethanolamine phosphate transferase 3 OS=Mus musculus GN=Pigo PE=4 SV=1;tr|Q562G0|Q562G0_MOUSE GPI ethanolamine phosphate	16587000	0	1400100	691800	637950	0	53849	16713000	0	8547100	2	2	2	5.4	5.4	5.4	74.655	0	6.9077	17987000	3	2	0	1	2	0	1	2	0	1	2	0	1
163	B9EJ97;A2AG68;Q64430;Q3TAY6;Q3T9Y7	B9EJ97;A2AG68;Q64430	Copper-transporting ATPase 1	Atp7a	tr|B9EJ97|B9EJ97_MOUSE Atp7a protein OS=Mus musculus GN=Atp7a PE=2 SV=1;tr|A2AG68|A2AG68_MOUSE Copper-transporting ATPase 1 OS=Mus musculus GN=Atp7a PE=1 SV=1;sp|Q64430|ATP7A_MOUSE Copper-transporting ATPase 1 OS=Mus musculus GN=Atp7a PE=1 SV=3	396290000	370240000	253950000	14578000	5661200	5289200	3627900	884400000	710380000	634620000	10	10	9	10.3	10.3	9.6	161.98	0	27.055	1020500000	28	7	8	9	7	8	9	6	7	8	9	10	9
164	A2AGH8;A2AGH9;A2AGH6-2;A2AGH6;A2AGH6-3;Q2NLB9;Q8BQM9;Q8BQM9-2;Q6ZPK9	A2AGH8;A2AGH9;A2AGH6-2;A2AGH6	Mediator of RNA polymerase II transcription subunit 12	Med12	tr|A2AGH8|A2AGH8_MOUSE Mediator of RNA polymerase II transcription subunit 12 OS=Mus musculus GN=Med12 PE=1 SV=1;tr|A2AGH9|A2AGH9_MOUSE Mediator of RNA polymerase II transcription subunit 12 OS=Mus musculus GN=Med12 PE=1 SV=1;sp|A2AGH6-2|MED12_MOUSE Isofor	265630000	265470000	221210000	6430000	2270300	2269000	1890700	442520000	427140000	545370000	21	21	21	12.4	12.4	12.4	240.87	0	35.688	752310000	39	12	13	12	12	13	12	12	13	12	13	15	11
165	A6PWP8;A2AGR1;A2AGQ3;A2AGQ2;A2AGQ8;A2AGQ7;A2AGQ9;A2AGR0;A2AGQ5;A2AGQ6;E9QN47;A2AGQ4;Q80U28-13;Q80U28-12;Q80U28-11;Q80U28-10;Q80U28-9;Q80U28-8;Q80U28-7;Q80U28-6;Q80U28-5;Q80U28-4;Q80U28-3;Q80U28-2;Q80U28-15;Q80U28;Q80U28-14;A6PWP7	A6PWP8;A2AGR1;A2AGQ3;A2AGQ2;A2AGQ8;A2AGQ7;A2AGQ9;A2AGR0;A2AGQ5;A2AGQ6;E9QN47;A2AGQ4;Q80U28-13;Q80U28-12;Q80U28-11;Q80U28-10;Q80U28-9;Q80U28-8;Q80U28-7;Q80U28-6;Q80U28-5;Q80U28-4;Q80U28-3;Q80U28-2;Q80U28-15;Q80U28;Q80U28-14;A6PWP7	MAP kinase-activating death domain protein	Madd	tr|A6PWP8|A6PWP8_MOUSE MAP kinase-activating death domain protein OS=Mus musculus GN=Madd PE=4 SV=1;tr|A2AGR1|A2AGR1_MOUSE MAP kinase-activating death domain protein OS=Mus musculus GN=Madd PE=1 SV=1;tr|A2AGQ3|A2AGQ3_MOUSE MAP kinase-activating death domai	15011000	11364000	24341000	939180	277980	210450	450750	22754000	17368000	23117000	2	2	2	2.5	2.5	2.5	123.36	0	3.1256	50716000	4	1	1	2	1	1	2	1	1	2	1	1	2
166	A2AH22-2;A2AH22-6;A2AH22;A2AH22-3;A2AH22-5;A2AH22-7;A2AH22-4	A2AH22-2;A2AH22-6;A2AH22;A2AH22-3;A2AH22-5;A2AH22-7;A2AH22-4	Activating molecule in BECN1-regulated autophagy protein 1	Ambra1	sp|A2AH22-2|AMRA1_MOUSE Isoform 2 of Activating molecule in BECN1-regulated autophagy protein 1 OS=Mus musculus GN=Ambra1;sp|A2AH22-6|AMRA1_MOUSE Isoform 6 of Activating molecule in BECN1-regulated autophagy protein 1 OS=Mus musculus GN=Ambra1;sp|A2AH22|AM	62324000	55794000	28944000	2334300	989270	885620	459420	100030000	56072000	55595000	5	5	5	5	5	5	133.11	0	6.8223	147060000	5	4	2	1	4	2	1	4	2	1	2	2	1
167	A2AH75;Q60575-3;Q3UY61;Q3UUN4;Q05BI6;Q05BP4;Q8BN53	A2AH75;Q60575-3;Q3UY61	Kinesin-like protein;Kinesin-like protein KIF1B	Kif1b	tr|A2AH75|A2AH75_MOUSE Kinesin family member 1B, isoform CRA_a OS=Mus musculus GN=Kif1b PE=3 SV=1;sp|Q60575-3|KIF1B_MOUSE Isoform 3 of Kinesin-like protein KIF1B OS=Mus musculus GN=Kif1b;tr|Q3UY61|Q3UY61_MOUSE Putative uncharacterized protein (Fragment) OS	0	15279000	6934300	304290	0	209300	94991	0	14909000	25719000	18	2	2	22.2	2.6	2.6	130.05	0	3.6043	22213000	3	11	14	10	0	2	1	0	2	1	0	2	1
168	Q543F1;Q3U5Q3;A2AH85;Q6A0E3;O08810;G3UZ34;Q3TMY8;Q7TMX4;G3UXK8;G3UZ25	Q543F1;Q3U5Q3;A2AH85;Q6A0E3;O08810;G3UZ34;Q3TMY8;Q7TMX4	116 kDa U5 small nuclear ribonucleoprotein component	Eftud2	tr|Q543F1|Q543F1_MOUSE Putative uncharacterized protein OS=Mus musculus GN=Eftud2 PE=2 SV=1;tr|Q3U5Q3|Q3U5Q3_MOUSE Putative uncharacterized protein OS=Mus musculus GN=Eftud2 PE=2 SV=1;tr|A2AH85|A2AH85_MOUSE 116 kDa U5 small nuclear ribonucleoprotein compon	20076000000	18800000000	15693000000	1010500000	371770000	348140000	290610000	31175000000	31651000000	30090000000	48	47	47	69.8	68.8	68.8	109.36	0	323.31	54568000000	314	42	42	45	41	41	44	41	41	44	98	107	109
169	A2AHC3;A2AHC4;A2AHC3-2;F6Q2D3;F6QF29;F6W3X2;V9GXT0;V9GXD7	A2AHC3;A2AHC4;A2AHC3-2	Calmodulin-regulated spectrin-associated protein 1	Camsap1	sp|A2AHC3|CAMP1_MOUSE Calmodulin-regulated spectrin-associated protein 1 OS=Mus musculus GN=Camsap1 PE=1 SV=1;tr|A2AHC4|A2AHC4_MOUSE Calmodulin-regulated spectrin-associated protein 1 (Fragment) OS=Mus musculus GN=Camsap1 PE=4 SV=1;sp|A2AHC3-2|CAMP1_MOUSE	396490000	550780000	525490000	14439000	3887200	5399800	5151900	892100000	974200000	1050200000	22	22	22	20.2	20.2	20.2	175.89	0	52.865	1472800000	45	13	13	17	13	13	17	13	13	17	14	15	16
170	E9PV92;A2AHG4;E9QKW9;A2AHG2;Q6ZPK0-6;Q6ZPK0-8;Q6ZPK0-3;Q6ZPK0;A2AHG3;D3Z764;Q6ZPK0-5;Q6ZPK0-7;Q6ZPK0-4;Q6ZPK0-9;Q6ZPK0-2;F6URE6;F6U6L3;F6TKP4;E0CYN5;F6TL54;E0CZ36;E0CZ79	E9PV92;A2AHG4;E9QKW9;A2AHG2;Q6ZPK0-6;Q6ZPK0-8;Q6ZPK0-3;Q6ZPK0;A2AHG3;D3Z764;Q6ZPK0-5;Q6ZPK0-7;Q6ZPK0-4;Q6ZPK0-9;Q6ZPK0-2;F6URE6	PHD finger protein 21A	Phf21a	tr|E9PV92|E9PV92_MOUSE PHD finger protein 21A OS=Mus musculus GN=Phf21a PE=4 SV=2;tr|A2AHG4|A2AHG4_MOUSE PHD finger protein 21A OS=Mus musculus GN=Phf21a PE=4 SV=1;tr|E9QKW9|E9QKW9_MOUSE PHD finger protein 21A OS=Mus musculus GN=Phf21a PE=4 SV=2;tr|A2AHG2|	90785000	70357000	170160000	8494800	2327800	1804000	4363000	181990000	196490000	216210000	9	9	9	20.3	20.3	20.3	67.776	0	13.73	331300000	15	6	5	5	6	5	5	6	5	5	6	5	4
171	A2AHJ7;A2AHK0;Q80UP3;Q91YS0	A2AHJ7;A2AHK0;Q80UP3;Q91YS0	Diacylglycerol kinase;Diacylglycerol kinase zeta	Dgkz	tr|A2AHJ7|A2AHJ7_MOUSE Diacylglycerol kinase OS=Mus musculus GN=Dgkz PE=3 SV=1;tr|A2AHK0|A2AHK0_MOUSE Diacylglycerol kinase OS=Mus musculus GN=Dgkz PE=3 SV=1;sp|Q80UP3|DGKZ_MOUSE Diacylglycerol kinase zeta OS=Mus musculus GN=Dgkz PE=1 SV=2;tr|Q91YS0|Q91YS0	39414000	19361000	58523000	2300000	772820	379630	1147500	66000000	55284000	102390000	4	4	4	6.8	6.8	6.8	105.9	0	5.941	117300000	11	3	2	3	3	2	3	3	2	3	3	2	6
172	Q6GTZ3;A2AHY3;P20067-2;P20067	Q6GTZ3;A2AHY3;P20067-2;P20067	DNA-binding protein inhibitor ID-1	Id1	tr|Q6GTZ3|Q6GTZ3_MOUSE Idb1 protein OS=Mus musculus GN=Id1 PE=2 SV=1;tr|A2AHY3|A2AHY3_MOUSE DNA-binding protein inhibitor ID-1 OS=Mus musculus GN=Id1 PE=4 SV=1;sp|P20067-2|ID1_MOUSE Isoform Short of DNA-binding protein inhibitor ID-1 OS=Mus musculus GN=Id1	90870000	67823000	22869000	25938000	12981000	9689000	3267100	203700000	122550000	87131000	3	3	3	31.8	31.8	31.8	15.56	0	8.8784	181560000	11	3	3	2	3	3	2	3	3	2	4	5	2
173	A2AHZ2;Q06985;P61092	A2AHZ2;Q06985;P61092	E3 ubiquitin-protein ligase;E3 ubiquitin-protein ligase SIAH1B;E3 ubiquitin-protein ligase SIAH1A	Siah1b;Siah1a	tr|A2AHZ2|A2AHZ2_MOUSE E3 ubiquitin-protein ligase OS=Mus musculus GN=Siah1b PE=3 SV=1;sp|Q06985|SIA1B_MOUSE E3 ubiquitin-protein ligase SIAH1B OS=Mus musculus GN=Siah1b PE=2 SV=2;sp|P61092|SIA1A_MOUSE E3 ubiquitin-protein ligase SIAH1A OS=Mus musculus GN=	17764000	24709000	24125000	4757000	1268900	1764900	1723200	55411000	58354000	67477000	1	1	1	3.5	3.5	3.5	31.154	0.0041494	1.7901	66599000	4	1	1	1	1	1	1	1	1	1	1	2	1
174	A2AI05-2;A2AI05;F6XCS1	A2AI05-2;A2AI05;F6XCS1	NADPH-dependent diflavin oxidoreductase 1	Ndor1	sp|A2AI05-2|NDOR1_MOUSE Isoform 2 of NADPH-dependent diflavin oxidoreductase 1 OS=Mus musculus GN=Ndor1;sp|A2AI05|NDOR1_MOUSE NADPH-dependent diflavin oxidoreductase 1 OS=Mus musculus GN=Ndor1 PE=2 SV=1;tr|F6XCS1|F6XCS1_MOUSE NADPH-dependent diflavin oxido	8572800	19899000	18620000	1883700	342910	795970	744790	0	36867000	40760000	2	2	2	6.2	6.2	6.2	59.749	0	6.2222	47092000	3	1	1	1	1	1	1	1	1	1	1	1	1
175	Q3UZ62;A2AI52;Q80U87;Q3UQ26;Q3TQM7;Q58E42	Q3UZ62;A2AI52;Q80U87;Q3UQ26;Q3TQM7	Ubiquitin carboxyl-terminal hydrolase;Ubiquitin carboxyl-terminal hydrolase 8	Usp8	tr|Q3UZ62|Q3UZ62_MOUSE Ubiquitin carboxyl-terminal hydrolase OS=Mus musculus GN=Usp8 PE=2 SV=1;tr|A2AI52|A2AI52_MOUSE Ubiquitin carboxyl-terminal hydrolase OS=Mus musculus GN=Usp8 PE=1 SV=1;sp|Q80U87|UBP8_MOUSE Ubiquitin carboxyl-terminal hydrolase 8 OS=Mu	503230000	425760000	513250000	21210000	7400500	6261200	7547800	792910000	779710000	1102700000	14	14	14	16.2	16.2	16.2	122.65	0	37.956	1442200000	41	11	12	10	11	12	10	11	12	10	11	14	16
176	A2AI57;B9EK83;Q923J1	A2AI57;B9EK83;Q923J1	Transient receptor potential cation channel subfamily M member 7	Trpm7	tr|A2AI57|A2AI57_MOUSE Transient receptor potential cation channel subfamily M member 7 OS=Mus musculus GN=Trpm7 PE=1 SV=1;tr|B9EK83|B9EK83_MOUSE Transient receptor potential cation channel, subfamily M, member 7 OS=Mus musculus GN=Trpm7 PE=2 SV=1;sp|Q923J	28418000	10303000	32440000	629740	251480	91178	287080	60182000	41687000	56910000	3	3	3	2.4	2.4	2.4	212.33	0	6.998	71161000	5	2	1	2	2	1	2	2	1	2	2	1	2
177	Q3URG0;A2AI78;Q80YA9-2;Q80YA9	Q3URG0;A2AI78;Q80YA9-2;Q80YA9	Connector enhancer of kinase suppressor of ras 2	Cnksr2	tr|Q3URG0|Q3URG0_MOUSE Putative uncharacterized protein (Fragment) OS=Mus musculus GN=Cnksr2 PE=2 SV=1;tr|A2AI78|A2AI78_MOUSE Connector enhancer of kinase suppressor of ras 2 OS=Mus musculus GN=Cnksr2 PE=1 SV=1;sp|Q80YA9-2|CNKR2_MOUSE Isoform 2 of Connecto	0	0	0	0	0	0	0	0	0	0	1	1	1	2.2	2.2	2.2	56.257	1	-2	0	0	1	1	1	1	1	1	1	1	1	0	0	0
178	A2AI89;A2AI88;A2AI87;P18826-2;P18826;Q8CBA7;Q3UV91;A2AI91;Q8BSV5;Q3TQJ0	A2AI89;A2AI88;A2AI87;P18826-2;P18826;Q8CBA7;Q3UV91;A2AI91	Phosphorylase b kinase regulatory subunit alpha, skeletal muscle isoform	Phka1	tr|A2AI89|A2AI89_MOUSE Phosphorylase b kinase regulatory subunit alpha, skeletal muscle isoform OS=Mus musculus GN=Phka1 PE=4 SV=1;tr|A2AI88|A2AI88_MOUSE Phosphorylase b kinase regulatory subunit alpha, skeletal muscle isoform OS=Mus musculus GN=Phka1 PE=4	148370000	216690000	201780000	8588500	2248000	3283200	3057300	353650000	343170000	251620000	9	9	9	11.3	11.3	11.3	135.6	0	19.457	566840000	15	5	5	6	5	5	6	5	5	6	5	5	5
179	A2AIL4	A2AIL4	NADH dehydrogenase (ubiquinone) complex I, assembly factor 6	Ndufaf6	sp|A2AIL4|NDUF6_MOUSE NADH dehydrogenase (ubiquinone) complex I, assembly factor 6 OS=Mus musculus GN=Ndufaf6 PE=3 SV=1	75638000	103710000	141300000	16876000	3981000	5458500	7436800	258770000	179040000	234850000	4	4	4	17.7	17.7	17.7	38.362	0	6.9226	320650000	10	2	3	3	2	3	3	2	3	3	3	3	4
180	E9PZY8;A2AIV2;A2AIV2-2;Q8CFK9;REV__Q8BI55	E9PZY8;A2AIV2;A2AIV2-2	Protein virilizer homolog	1110037F02Rik;Kiaa1429	tr|E9PZY8|E9PZY8_MOUSE Protein 1110037F02Rik OS=Mus musculus GN=1110037F02Rik PE=1 SV=1;sp|A2AIV2|VIR_MOUSE Protein virilizer homolog OS=Mus musculus GN=Kiaa1429 PE=1 SV=1;sp|A2AIV2-2|VIR_MOUSE Isoform 2 of Protein virilizer homolog OS=Mus musculus GN=Kiaa	692220000	485450000	641000000	16685000	6350700	4453600	5880700	1163400000	1082200000	1059400000	26	26	26	20.3	20.3	20.3	207.17	0	70.461	1818700000	61	19	15	18	19	15	18	19	15	18	23	18	20
181	A2AIX1;E9QAT4;Q811L5;Q8K000;Q80U43;F7BPW6;Q8R336;Q3TRA8;Q3TZR0	A2AIX1;E9QAT4;Q811L5;Q8K000;Q80U43;F7BPW6		Sec16a	tr|A2AIX1|A2AIX1_MOUSE Protein Sec16a OS=Mus musculus GN=Sec16a PE=1 SV=1;tr|E9QAT4|E9QAT4_MOUSE Protein Sec16a OS=Mus musculus GN=Sec16a PE=1 SV=1;tr|Q811L5|Q811L5_MOUSE Sec16a protein (Fragment) OS=Mus musculus GN=Sec16a PE=2 SV=1;tr|Q8K000|Q8K000_MOUSE	822020000	725280000	972980000	24953000	8138800	7181000	9633500	1369400000	1325300000	1401100000	25	25	25	19.4	19.4	19.4	256.47	0	72.252	2520300000	56	16	13	20	16	13	20	16	13	20	18	15	23
182	Q8BTW7;Q923C1;A2AJ15;Q8R3F8	Q8BTW7;Q923C1;A2AJ15;Q8R3F8	alpha-1,2-Mannosidase;Endoplasmic reticulum mannosyl-oligosaccharide 1,2-alpha-mannosidase	Man1b1	tr|Q8BTW7|Q8BTW7_MOUSE Putative uncharacterized protein (Fragment) OS=Mus musculus GN=Man1b1 PE=2 SV=1;tr|Q923C1|Q923C1_MOUSE Man1b1 protein (Fragment) OS=Mus musculus GN=Man1b1 PE=2 SV=1;sp|A2AJ15|MA1B1_MOUSE Endoplasmic reticulum mannosyl-oligosaccharide	87023000	28393000	37575000	6651800	3783600	1234500	1633700	60788000	82093000	100210000	3	3	3	9.6	9.6	9.6	52.393	0	3.4023	152990000	7	3	1	2	3	1	2	3	1	2	3	2	2
183	A2AJ26;P41234;Q6ZPZ4;Q8BPY1;P41233	A2AJ26;P41234;Q6ZPZ4	ATP-binding cassette sub-family A member 2	Abca2	tr|A2AJ26|A2AJ26_MOUSE ATP-binding cassette sub-family A member 2 OS=Mus musculus GN=Abca2 PE=1 SV=1;sp|P41234|ABCA2_MOUSE ATP-binding cassette sub-family A member 2 OS=Mus musculus GN=Abca2 PE=1 SV=4;tr|Q6ZPZ4|Q6ZPZ4_MOUSE MKIAA1062 protein (Fragment) OS=	126960000	188320000	87274000	3659600	1154200	1712000	793400	256230000	263240000	236280000	10	10	10	5.2	5.2	5.2	270.52	0	25.992	402560000	13	4	7	5	4	7	5	4	7	5	3	6	4
184	A2AJ72;A2AJ71;F6W2V3	A2AJ72		Fubp3	tr|A2AJ72|A2AJ72_MOUSE MCG130458 OS=Mus musculus GN=Fubp3 PE=4 SV=1	4991100000	3355900000	3045300000	292110000	127980000	86048000	78086000	6062100000	6268600000	5272200000	25	25	1	63.3	63.3	3.5	61.447	0	140.53	11392000000	109	20	20	22	20	20	22	1	1	1	33	37	39
185	A2AJ88-3;A2AJ88-2;A2AJ88	A2AJ88-3;A2AJ88-2;A2AJ88	Patatin-like phospholipase domain-containing protein 7	Pnpla7	sp|A2AJ88-3|PLPL7_MOUSE Isoform 3 of Patatin-like phospholipase domain-containing protein 7 OS=Mus musculus GN=Pnpla7;sp|A2AJ88-2|PLPL7_MOUSE Isoform 2 of Patatin-like phospholipase domain-containing protein 7 OS=Mus musculus GN=Pnpla7;sp|A2AJ88|PLPL7_MOUS	20881000	64849000	19544000	2288600	453940	1409800	424860	46787000	77296000	36380000	2	2	2	4.2	4.2	4.2	91.941	0.0046962	1.7202	105270000	4	1	2	2	1	2	2	1	2	2	1	2	1
186	A2AJG0;Q80UU2;Q8BX36	A2AJG0;Q80UU2;Q8BX36	Ribonuclease P protein subunit p38	Rpp38	tr|A2AJG0|A2AJG0_MOUSE Ribonuclease P protein subunit p38 OS=Mus musculus GN=Rpp38 PE=4 SV=1;sp|Q80UU2|RPP38_MOUSE Ribonuclease P protein subunit p38 OS=Mus musculus GN=Rpp38 PE=2 SV=1;tr|Q8BX36|Q8BX36_MOUSE Putative uncharacterized protein (Fragment) OS=M	359010000	421410000	328690000	65242000	21118000	24789000	19335000	662780000	680310000	742960000	12	12	12	45	45	45	31.189	0	22.192	1109100000	30	8	8	9	8	8	9	8	8	9	7	11	12
187	A2AJH3;Q3THR4;O70311;Q8CFK1	A2AJH3;Q3THR4;O70311;Q8CFK1	Glycylpeptide N-tetradecanoyltransferase;Glycylpeptide N-tetradecanoyltransferase 2	Nmt2	tr|A2AJH3|A2AJH3_MOUSE Glycylpeptide N-tetradecanoyltransferase OS=Mus musculus GN=Nmt2 PE=3 SV=1;tr|Q3THR4|Q3THR4_MOUSE Glycylpeptide N-tetradecanoyltransferase OS=Mus musculus GN=Nmt2 PE=2 SV=1;sp|O70311|NMT2_MOUSE Glycylpeptide N-tetradecanoyltransferas	675460000	872700000	432110000	61884000	21108000	27272000	13504000	887090000	1072400000	1143200000	13	9	9	35.9	25.7	25.7	56.984	0	39.788	1980300000	27	10	10	10	7	7	6	7	7	6	9	10	8
188	A2AJI0-2;A2AJI0;A2AJI1;A8Y5P4;F6WF36	A2AJI0-2;A2AJI0;A2AJI1;A8Y5P4;F6WF36	MAP7 domain-containing protein 1	Map7d1	sp|A2AJI0-2|MA7D1_MOUSE Isoform 2 of MAP7 domain-containing protein 1 OS=Mus musculus GN=Map7d1;sp|A2AJI0|MA7D1_MOUSE MAP7 domain-containing protein 1 OS=Mus musculus GN=Map7d1 PE=1 SV=1;tr|A2AJI1|A2AJI1_MOUSE MAP7 domain-containing protein 1 OS=Mus muscul	981230000	845610000	1008000000	65927000	22819000	19665000	23443000	1605100000	1509100000	1542600000	16	16	16	27.2	27.2	27.2	89.309	0	76.761	2834900000	43	12	10	11	12	10	11	12	10	11	15	14	14
189	A2AJK6-3;A2AJK6	A2AJK6-3;A2AJK6	Chromodomain-helicase-DNA-binding protein 7	Chd7	sp|A2AJK6-3|CHD7_MOUSE Isoform 3 of Chromodomain-helicase-DNA-binding protein 7 OS=Mus musculus GN=Chd7;sp|A2AJK6|CHD7_MOUSE Chromodomain-helicase-DNA-binding protein 7 OS=Mus musculus GN=Chd7 PE=1 SV=1	60362000	5278600	10081000	504810	402410	35191	67204	63130000	0	0	9	4	4	3.6	2	2	331.19	0.0053725	1.6264	75721000	5	4	6	5	1	3	1	1	3	1	1	3	1
190	Q05BF9;A8Y5Q1;A2AJP9;A8Y5Q0;A2AJQ0;Q3UV70	Q05BF9;A8Y5Q1;A2AJP9;A8Y5Q0;A2AJQ0;Q3UV70	[Pyruvate dehydrogenase [acetyl-transferring]]-phosphatase 1, mitochondrial	Pdp1	tr|Q05BF9|Q05BF9_MOUSE Ppm2c protein OS=Mus musculus GN=Pdp1 PE=2 SV=1;tr|A8Y5Q1|A8Y5Q1_MOUSE MCG54027, isoform CRA_b OS=Mus musculus GN=Pdp1 PE=2 SV=1;tr|A2AJP9|A2AJP9_MOUSE MCG54027, isoform CRA_a OS=Mus musculus GN=Pdp1 PE=3 SV=2;tr|A8Y5Q0|A8Y5Q0_MOUSE	119620000	66232000	27440000	6273200	3518100	1948000	807070	181250000	153050000	0	7	7	7	17.8	17.8	17.8	61.181	0	12.386	213290000	13	5	2	2	5	2	2	5	2	2	7	4	2
191	A2AJQ2;A2AJQ3-2;A2AJQ3	A2AJQ2;A2AJQ3-2;A2AJQ3	Probable C-mannosyltransferase DPY19L4	Dpy19l4	tr|A2AJQ2|A2AJQ2_MOUSE Probable C-mannosyltransferase DPY19L4 (Fragment) OS=Mus musculus GN=Dpy19l4 PE=4 SV=1;sp|A2AJQ3-2|D19L4_MOUSE Isoform 2 of Probable C-mannosyltransferase DPY19L4 OS=Mus musculus GN=Dpy19l4;sp|A2AJQ3|D19L4_MOUSE Probable C-mannosyltr	55507000	20778000	55563000	4883300	2055800	769560	2057900	29884000	78800000	56647000	1	1	1	3.6	3.6	3.6	57.754	0	19.646	131850000	3	1	1	1	1	1	1	1	1	1	1	1	1
192	Q3TM66;A2AK40;Q148S1;O35149	Q3TM66;A2AK40;Q148S1;O35149	Zinc transporter 4	Slc30a4	tr|Q3TM66|Q3TM66_MOUSE Putative uncharacterized protein OS=Mus musculus GN=Slc30a4 PE=2 SV=1;tr|A2AK40|A2AK40_MOUSE Zinc transporter 4 OS=Mus musculus GN=Slc30a4 PE=4 SV=1;tr|Q148S1|Q148S1_MOUSE Solute carrier family 30 (Zinc transporter), member 4 OS=Mus	0	41706000	17828000	4961200	0	3475500	1485700	0	62654000	43988000	1	1	1	5	5	5	42.392	0.0023242	1.9916	59535000	2	0	1	1	0	1	1	0	1	1	0	1	1
193	B1AYU4;A2AK44;A2AK42;B1AYU7;Q6ZPL7;Q8C5N3-2;Q8C5N3;Q99LG3;J3QNR0;J3QM48;Q3TLI8;Q5FWA5;Q499E2	B1AYU4;A2AK44;A2AK42;B1AYU7;Q6ZPL7;Q8C5N3-2;Q8C5N3	Pre-mRNA-splicing factor CWC22 homolog	Cwc22;Gm13695;Gm13697;mKIAA1604	tr|B1AYU4|B1AYU4_MOUSE Pre-mRNA-splicing factor CWC22 homolog OS=Mus musculus GN=Cwc22 PE=1 SV=1;tr|A2AK44|A2AK44_MOUSE Protein Gm13695 OS=Mus musculus GN=Gm13695 PE=4 SV=1;tr|A2AK42|A2AK42_MOUSE Protein Gm13691 OS=Mus musculus GN=Gm13697 PE=4 SV=1;tr|B1AY	891050000	411490000	451330000	41759000	21215000	9797500	10746000	1028400000	1021300000	911340000	11	11	11	17.2	17.2	17.2	82.752	0	30.087	1753900000	28	9	6	7	9	6	7	9	6	7	9	9	10
194	A2AK70;P48760-2;P48760-5;P48760-4;P48760;P48760-3	A2AK70;P48760-2;P48760-5;P48760-4;P48760;P48760-3	Folylpolyglutamate synthase, mitochondrial	Fpgs	tr|A2AK70|A2AK70_MOUSE Folylpolyglutamate synthase, mitochondrial (Fragment) OS=Mus musculus GN=Fpgs PE=4 SV=1;sp|P48760-2|FOLC_MOUSE Isoform 2 of Folylpolyglutamate synthase, mitochondrial OS=Mus musculus GN=Fpgs;sp|P48760-5|FOLC_MOUSE Isoform 5 of Folylp	98773000	48358000	58334000	12842000	6173300	3022400	3645900	157060000	138930000	144280000	5	5	5	25.1	25.1	25.1	27.613	0	14.889	205460000	17	3	3	4	3	3	4	3	3	4	5	5	7
195	A2AKB9-2;A2AKB9;Z4YN28;A2AKB9-4;A2AKB9-3	A2AKB9-2;A2AKB9;Z4YN28;A2AKB9-4;A2AKB9-3	DDB1- and CUL4-associated factor 10	Dcaf10	sp|A2AKB9-2|DCA10_MOUSE Isoform 2 of DDB1- and CUL4-associated factor 10 OS=Mus musculus GN=Dcaf10;sp|A2AKB9|DCA10_MOUSE DDB1- and CUL4-associated factor 10 OS=Mus musculus GN=Dcaf10 PE=2 SV=1;tr|Z4YN28|Z4YN28_MOUSE DDB1- and CUL4-associated factor 10 (Fra	0	0	36553000	1107700	0	0	1107700	0	0	48179000	4	4	4	9.5	9.5	9.5	57.614	0	2.993	36553000	4	0	1	3	0	1	3	0	1	3	0	1	3
196	Q3UVD6;A2AKD7;Q61234	Q3UVD6;A2AKD7;Q61234	Alpha-1-syntrophin	Snta1	tr|Q3UVD6|Q3UVD6_MOUSE Putative uncharacterized protein OS=Mus musculus GN=Snta1 PE=2 SV=1;tr|A2AKD7|A2AKD7_MOUSE Alpha-1-syntrophin OS=Mus musculus GN=Snta1 PE=1 SV=1;sp|Q61234|SNTA1_MOUSE Alpha-1-syntrophin OS=Mus musculus GN=Snta1 PE=1 SV=1	122800000	13379000	16937000	5888900	4722900	514580	651430	65266000	41045000	50227000	4	3	3	10.8	9.4	9.4	53.312	0	3.999	153110000	6	4	1	2	3	1	1	3	1	1	4	1	1
197	A2AKG8;E9PYJ6;Q80T90;A2AKG8-2;A2AKG8-3	A2AKG8;E9PYJ6	Focadhesin	Focad	sp|A2AKG8|FOCAD_MOUSE Focadhesin OS=Mus musculus GN=Focad PE=2 SV=1;tr|E9PYJ6|E9PYJ6_MOUSE Focadhesin OS=Mus musculus GN=Focad PE=4 SV=1	641570000	510940000	574320000	19623000	7290500	5806200	6526300	1065900000	1192600000	902500000	24	24	24	18.6	18.6	18.6	198.95	0	51.819	1726800000	54	16	12	17	16	12	17	16	12	17	15	15	24
198	A2AKH4;Q9D3L3;O09044;B0R030;B0R029;E9Q8A1;P60879	A2AKH4;Q9D3L3;O09044;B0R030;B0R029;E9Q8A1	Synaptosomal-associated protein;Synaptosomal-associated protein 23	Snap23	tr|A2AKH4|A2AKH4_MOUSE Synaptosomal-associated protein OS=Mus musculus GN=Snap23 PE=2 SV=1;tr|Q9D3L3|Q9D3L3_MOUSE Synaptosomal-associated protein OS=Mus musculus GN=Snap23 PE=1 SV=1;sp|O09044|SNP23_MOUSE Synaptosomal-associated protein 23 OS=Mus musculus G	471360000	198030000	254900000	66020000	33668000	14145000	18207000	540600000	446200000	365190000	8	8	8	53.8	53.8	53.8	23.261	0	25.238	924280000	16	7	4	6	7	4	6	7	4	6	8	3	5
199	A2AKU9;A2AKV2;A2AKV3;A2AKV1;A2AKV0	A2AKU9;A2AKV2;A2AKV3;A2AKV1	ATP synthase subunit gamma	Atp5c1	tr|A2AKU9|A2AKU9_MOUSE ATP synthase subunit gamma OS=Mus musculus GN=Atp5c1 PE=1 SV=1;tr|A2AKV2|A2AKV2_MOUSE ATP synthase subunit gamma, mitochondrial (Fragment) OS=Mus musculus GN=Atp5c1 PE=1 SV=1;tr|A2AKV3|A2AKV3_MOUSE ATP synthase subunit gamma, mitocho	0	0	0	0	0	0	0	0	0	0	14	1	1	49.2	4	4	32.77	0.00060332	2.5124	0	2	9	10	13	0	1	1	0	1	1	0	1	1
200	A2AKV7;A2AKV6;Q8K1E6	A2AKV7;A2AKV6;Q8K1E6	Alpha-ketoglutarate-dependent dioxygenase alkB homolog 3	Alkbh3	tr|A2AKV7|A2AKV7_MOUSE Alpha-ketoglutarate-dependent dioxygenase alkB homolog 3 (Fragment) OS=Mus musculus GN=Alkbh3 PE=4 SV=2;tr|A2AKV6|A2AKV6_MOUSE Alpha-ketoglutarate-dependent dioxygenase alkB homolog 3 OS=Mus musculus GN=Alkbh3 PE=4 SV=1;sp|Q8K1E6|ALK	69589000	70184000	65510000	14663000	4970600	5013100	4679300	92460000	86660000	91892000	2	2	2	12.9	12.9	12.9	23.5	0	4.9618	205280000	6	2	2	2	2	2	2	2	2	2	2	2	2
201	G3UYJ3;A2AKV9;A2AKW0;Q5HZI9	G3UYJ3;A2AKV9;A2AKW0;Q5HZI9	Solute carrier family 25 member 51	Slc25a51	tr|G3UYJ3|G3UYJ3_MOUSE Solute carrier family 25 member 51 (Fragment) OS=Mus musculus GN=Slc25a51 PE=3 SV=2;tr|A2AKV9|A2AKV9_MOUSE Solute carrier family 25 member 51 (Fragment) OS=Mus musculus GN=Slc25a51 PE=3 SV=2;tr|A2AKW0|A2AKW0_MOUSE Solute carrier fami	75928000	10003000	89955000	13530000	5840600	769440	6919600	82916000	45262000	101260000	4	4	4	24.6	24.6	24.6	22.072	0	8.027	175890000	11	3	2	3	3	2	3	3	2	3	4	2	5
202	A2AKX3;A2AKX3-2	A2AKX3;A2AKX3-2	Probable helicase senataxin	Setx	sp|A2AKX3|SETX_MOUSE Probable helicase senataxin OS=Mus musculus GN=Setx PE=1 SV=1;sp|A2AKX3-2|SETX_MOUSE Isoform 2 of Probable helicase senataxin OS=Mus musculus GN=Setx	29354000	35116000	23150000	561670	188170	225100	148400	63619000	67227000	51501000	5	5	5	3.3	3.3	3.3	297.59	0	3.9271	87620000	7	2	3	2	2	3	2	2	3	2	2	3	2
203	Q6P6I7;A2AL12;Q5FB19;Q3UZG3;Q8BG05;Q5U3M2;Q58E39;A2AL13;V9GX38	Q6P6I7;A2AL12;Q5FB19;Q3UZG3;Q8BG05;Q5U3M2	Heterogeneous nuclear ribonucleoprotein A3	Hnrnpa3	tr|Q6P6I7|Q6P6I7_MOUSE Hnrpa3 protein OS=Mus musculus GN=Hnrnpa3 PE=2 SV=1;tr|A2AL12|A2AL12_MOUSE Heterogeneous nuclear ribonucleoprotein A3 OS=Mus musculus GN=Hnrnpa3 PE=4 SV=1;tr|Q5FB19|Q5FB19_MOUSE Heterogeneous nuclear ribonucleoprotein A3 OS=Mus muscu	59744000000	57655000000	60096000000	10441000000	3514300000	3391500000	3535100000	70630000000	62270000000	75210000000	25	25	5	63.2	63.2	10.1	34.376	0	318.34	177500000000	613	24	25	23	24	25	23	5	5	5	210	203	200
204	R4GML6;B2RXX1;A2AL36-2;A2AL36	R4GML6;B2RXX1;A2AL36-2;A2AL36	Centriolin	Cntrl	tr|R4GML6|R4GML6_MOUSE Centriolin (Fragment) OS=Mus musculus GN=Cntrl PE=4 SV=1;tr|B2RXX1|B2RXX1_MOUSE Cep110 protein OS=Mus musculus GN=Cntrl PE=2 SV=1;sp|A2AL36-2|CNTRL_MOUSE Isoform 2 of Centriolin OS=Mus musculus GN=Cntrl;sp|A2AL36|CNTRL_MOUSE Centriol	0	0	0	0	0	0	0	0	0	0	1	1	1	0.6	0.6	0.6	266.76	1	-2	0	0	0	1	0	0	1	0	0	1	0	0	0	0
205	A2AL50;Q8C0I1;H3BKN2;A2AL49;Q8BKC4;Q3TNW8;H3BIY5;D3Z623	A2AL50;Q8C0I1;H3BKN2;A2AL49;Q8BKC4	Alkyldihydroxyacetonephosphate synthase, peroxisomal	Agps	tr|A2AL50|A2AL50_MOUSE Alkyldihydroxyacetonephosphate synthase, peroxisomal OS=Mus musculus GN=Agps PE=1 SV=1;sp|Q8C0I1|ADAS_MOUSE Alkyldihydroxyacetonephosphate synthase, peroxisomal OS=Mus musculus GN=Agps PE=1 SV=1;tr|H3BKN2|H3BKN2_MOUSE Alkyldihydroxya	4015000000	3621400000	2997500000	259360000	97928000	88326000	73110000	6062900000	6301400000	5140500000	21	21	21	42.6	42.6	42.6	74.342	0	139.89	10634000000	95	20	19	16	20	19	16	20	19	16	32	31	32
206	Q9EQ66;A2AL85;Q8BSY0;Q8CBM2;Q8BQK0;A2AL83;A2AL79;Q6P8S1;Q8CH79;A2AL78;Q9EQ67;Q91WG6;Q3TU40;Q9EQ65;A2AL81;A2AL71;Q9EQ63;Q9EQ62;A2AL77;Q9CR06;Q9D7J8;Q920F7;A2AL74;Q920F8;A2AL76;Q920F9;A2AL75;Q9EQ64	Q9EQ66;A2AL85;Q8BSY0;Q8CBM2;Q8BQK0	Aspartyl/asparaginyl beta-hydroxylase	ASPH;Asph	tr|Q9EQ66|Q9EQ66_MOUSE Aspartly beta-hydroxylase OS=Mus musculus GN=ASPH PE=4 SV=1;tr|A2AL85|A2AL85_MOUSE Aspartyl/asparaginyl beta-hydroxylase OS=Mus musculus GN=Asph PE=4 SV=1;sp|Q8BSY0|ASPH_MOUSE Aspartyl/asparaginyl beta-hydroxylase OS=Mus musculus GN=	689710000	709190000	683530000	59498000	19706000	20262000	19529000	865990000	1041000000	1293600000	17	17	17	31.2	31.2	31.2	77.319	0	51.391	2082400000	39	11	11	12	11	11	12	11	11	12	11	12	16
207	A2ALA4;Q62276-2;Q62276	A2ALA4;Q62276-2;Q62276	Mediator of RNA polymerase II transcription subunit 22	Med22	tr|A2ALA4|A2ALA4_MOUSE Mediator of RNA polymerase II transcription subunit 22 (Fragment) OS=Mus musculus GN=Med22 PE=4 SV=1;sp|Q62276-2|MED22_MOUSE Isoform 2 of Mediator of RNA polymerase II transcription subunit 22 OS=Mus musculus GN=Med22;sp|Q62276|MED22	46728000	106500000	29321000	16595000	4248000	9681700	2665500	150550000	120200000	114220000	1	1	1	10.7	10.7	10.7	19.562	0	10.497	182550000	4	1	1	1	1	1	1	1	1	1	1	2	1
208	V9GXE6;I6L9E0;Q3U3J6;A2ALA6;P09925	V9GXE6;I6L9E0;Q3U3J6;A2ALA6;P09925	Surfeit locus protein 1	Surf1	tr|V9GXE6|V9GXE6_MOUSE Surfeit locus protein 1 (Fragment) OS=Mus musculus GN=Surf1 PE=4 SV=1;tr|I6L9E0|I6L9E0_MOUSE Surf1 protein OS=Mus musculus GN=Surf1 PE=2 SV=1;tr|Q3U3J6|Q3U3J6_MOUSE Putative uncharacterized protein OS=Mus musculus GN=Surf1 PE=2 SV=1;	31936000	107200000	114260000	14078000	1774200	5955700	6347900	204030000	195240000	107130000	4	4	4	26.2	26.2	26.2	28.247	0	10.188	253400000	8	1	2	4	1	2	4	1	2	4	1	4	3
209	A2ALB1;A2ALB2;Q6PAQ4	A2ALB1;A2ALB2;Q6PAQ4	RNA exonuclease 4	Rexo4	tr|A2ALB1|A2ALB1_MOUSE RNA exonuclease 4 (Fragment) OS=Mus musculus GN=Rexo4 PE=4 SV=1;tr|A2ALB2|A2ALB2_MOUSE RNA exonuclease 4 OS=Mus musculus GN=Rexo4 PE=4 SV=1;sp|Q6PAQ4|REXO4_MOUSE RNA exonuclease 4 OS=Mus musculus GN=Rexo4 PE=2 SV=2	249750000	225410000	393720000	39494000	11352000	10246000	17896000	484050000	558170000	527810000	8	8	8	27	27	27	40.096	0	19.075	868870000	28	5	5	7	5	5	7	5	5	7	9	9	10
210	A2ALF2;Q6NZB0;A2ALF0;F6TQL3;A2ALF3;F6QIL6;D3Z4I5;F7CXJ2;E9PZT4	A2ALF2;Q6NZB0;A2ALF0;F6TQL3;A2ALF3	DnaJ homolog subfamily C member 8	Dnajc8	tr|A2ALF2|A2ALF2_MOUSE DnaJ (Hsp40) homolog, subfamily C, member 8 OS=Mus musculus GN=Dnajc8 PE=2 SV=1;sp|Q6NZB0|DNJC8_MOUSE DnaJ homolog subfamily C member 8 OS=Mus musculus GN=Dnajc8 PE=2 SV=2;tr|A2ALF0|A2ALF0_MOUSE DnaJ homolog subfamily C member 8 OS=M	2631500000	3239000000	2655300000	608990000	187970000	231360000	189660000	3214400000	3647300000	3257500000	11	11	11	52.2	52.2	52.2	29.812	0	96.664	8525800000	49	10	10	9	10	10	9	10	10	9	15	18	16
211	E9Q151;A2ALM6;Q8VBW1-3;Q8VBW1-2;Q8VBW1;F6UKB4;A0A023JDV8;B2LHN0;E9Q6T2	E9Q151;A2ALM6;Q8VBW1-3;Q8VBW1-2;Q8VBW1;F6UKB4	Transporter;Sodium- and chloride-dependent creatine transporter 1	Slc6a8	tr|E9Q151|E9Q151_MOUSE Transporter OS=Mus musculus GN=Slc6a8 PE=3 SV=1;tr|A2ALM6|A2ALM6_MOUSE Transporter OS=Mus musculus GN=Slc6a8 PE=2 SV=1;sp|Q8VBW1-3|SC6A8_MOUSE Isoform 3 of Sodium- and chloride-dependent creatine transporter 1 OS=Mus musculus GN=Slc6	156300000	49851000	150000000	16189000	7104700	2266000	6818200	203140000	82978000	288270000	6	5	5	11.6	10.5	10.5	69.96	0	12.135	356150000	6	4	4	3	3	3	2	3	3	2	3	1	2
212	A2ALP5;Q3UG32;P52734;Q99K79	A2ALP5;Q3UG32;P52734;Q99K79	FYVE, RhoGEF and PH domain-containing protein 1	Fgd1	tr|A2ALP5|A2ALP5_MOUSE FYVE, RhoGEF and PH domain-containing protein 1 OS=Mus musculus GN=Fgd1 PE=4 SV=1;tr|Q3UG32|Q3UG32_MOUSE Putative uncharacterized protein OS=Mus musculus GN=Fgd1 PE=2 SV=1;sp|P52734|FGD1_MOUSE FYVE, RhoGEF and PH domain-containing pr	21908000	26288000	12283000	1286800	466130	559330	261340	38766000	28132000	28891000	3	2	2	6.1	5.3	5.3	89.005	0.0013251	2.1842	60480000	4	1	3	1	1	2	1	1	2	1	1	2	1
213	A2ALR9;Q3V0C5;Q3V0C5-5;Q3V0C5-2;A2ALR8;Q3V0C5-4;Q3V0C5-3;B7ZNK5;F6TGT8;A2ALR5;F6VSP0;F7ALR2;F6TH61;F6VSQ9;F6Z2T3;A2BDP2	A2ALR9;Q3V0C5;Q3V0C5-5;Q3V0C5-2;A2ALR8	Ubiquitin carboxyl-terminal hydrolase 48	Usp48	tr|A2ALR9|A2ALR9_MOUSE Ubiquitin carboxyl-terminal hydrolase 48 OS=Mus musculus GN=Usp48 PE=4 SV=1;sp|Q3V0C5|UBP48_MOUSE Ubiquitin carboxyl-terminal hydrolase 48 OS=Mus musculus GN=Usp48 PE=2 SV=2;sp|Q3V0C5-5|UBP48_MOUSE Isoform 5 of Ubiquitin carboxyl-ter	1207000000	1563900000	2158400000	80809000	19786000	25638000	35384000	2423100000	2561900000	2777100000	18	18	18	24.5	24.5	24.5	118.77	0	25.711	4929300000	42	10	13	12	10	13	12	10	13	12	12	15	15
214	A7TU71;A2ALU4-2;A2ALU4;Q8C7N5	A7TU71;A2ALU4-2;A2ALU4	Protein Shroom2	Shroom2	tr|A7TU71|A7TU71_MOUSE Protein Shroom2 OS=Mus musculus GN=Shroom2 PE=1 SV=1;sp|A2ALU4-2|SHRM2_MOUSE Isoform 2 of Protein Shroom2 OS=Mus musculus GN=Shroom2;sp|A2ALU4|SHRM2_MOUSE Protein Shroom2 OS=Mus musculus GN=Shroom2 PE=1 SV=1	715210000	704790000	652190000	20722000	7152100	7047900	6521900	903870000	1104200000	1053600000	13	13	12	13.2	13.2	12.6	165.26	0	63.193	2072200000	33	9	10	11	9	10	11	9	9	10	11	10	12
215	A2ALW5-2;A2ALW5;Z4YLX5	A2ALW5-2;A2ALW5;Z4YLX5	DnaJ homolog subfamily C member 25	Dnajc25	sp|A2ALW5-2|DJC25_MOUSE Isoform 2 of DnaJ homolog subfamily C member 25 OS=Mus musculus GN=Dnajc25;sp|A2ALW5|DJC25_MOUSE DnaJ homolog subfamily C member 25 OS=Mus musculus GN=Dnajc25 PE=2 SV=1;tr|Z4YLX5|Z4YLX5_MOUSE DnaJ homolog subfamily C member 25 (Frag	71137000	47621000	69901000	12577000	4742500	3174700	4660100	109200000	96327000	160520000	2	2	2	7.6	7.6	7.6	28.968	0.0045701	1.7679	188660000	5	1	1	2	1	1	2	1	1	2	1	2	2
216	Q3ULL0;A2AM29	Q3ULL0;A2AM29	Protein AF-9	Mllt3	tr|Q3ULL0|Q3ULL0_MOUSE Putative uncharacterized protein OS=Mus musculus GN=Mllt3 PE=2 SV=1;sp|A2AM29|AF9_MOUSE Protein AF-9 OS=Mus musculus GN=Mllt3 PE=1 SV=1	100200000	93976000	22115000	21630000	10020000	9397600	2211500	151490000	172840000	107030000	2	2	2	14.2	14.2	14.2	23.769	0	8.0516	216300000	9	2	2	1	2	2	1	2	2	1	3	4	2
217	A2AMH5;A2AMH4;Q6X893;Q6X893-2;A2AMH3;A2AMH8	A2AMH5;A2AMH4;Q6X893;Q6X893-2;A2AMH3	Choline transporter-like protein 1	Slc44a1	tr|A2AMH5|A2AMH5_MOUSE Choline transporter-like protein 1 OS=Mus musculus GN=Slc44a1 PE=4 SV=1;tr|A2AMH4|A2AMH4_MOUSE Choline transporter-like protein 1 OS=Mus musculus GN=Slc44a1 PE=4 SV=1;sp|Q6X893|CTL1_MOUSE Choline transporter-like protein 1 OS=Mus mus	321870000	328080000	403900000	32933000	10058000	10252000	12622000	575770000	487360000	468160000	10	10	10	20.4	20.4	20.4	73.044	0	50.641	1053800000	23	4	4	8	4	4	8	4	4	8	6	6	11
218	A2AMI2;Q80XI3;Q80XI3-3;Q6DI78;A2AMI6;A2AMI4;Q8BQR8	A2AMI2;Q80XI3;Q80XI3-3;Q6DI78	Eukaryotic translation initiation factor 4 gamma 3	Eif4g3	tr|A2AMI2|A2AMI2_MOUSE Eukaryotic translation initiation factor 4 gamma 3 OS=Mus musculus GN=Eif4g3 PE=1 SV=1;sp|Q80XI3|IF4G3_MOUSE Eukaryotic translation initiation factor 4 gamma 3 OS=Mus musculus GN=Eif4g3 PE=1 SV=2;sp|Q80XI3-3|IF4G3_MOUSE Isoform 3 of	1173500000	1360300000	1274400000	36617000	11284000	13080000	12254000	1822900000	2152500000	2111400000	29	24	1	26.6	23.5	1.5	174.82	0	74.383	3808200000	60	19	23	21	14	19	16	1	1	1	18	23	19
219	A2AMM0	A2AMM0	Muscle-related coiled-coil protein	Murc	sp|A2AMM0|MURC_MOUSE Muscle-related coiled-coil protein OS=Mus musculus GN=Murc PE=2 SV=1	185100000	181290000	209700000	36005000	11569000	11331000	13106000	269880000	301630000	308320000	3	3	3	12.4	12.4	12.4	41.008	0	7.0732	576090000	15	3	3	3	3	3	3	3	3	3	4	6	5
220	A2AMU9;Q9D0I8;A2AMV1;Q9QYY3;D6RCI7	A2AMU9;Q9D0I8;A2AMV1;Q9QYY3	mRNA turnover protein 4 homolog	Mrto4;mg684	tr|A2AMU9|A2AMU9_MOUSE Mrto4 protein OS=Mus musculus GN=Mrto4 PE=2 SV=1;sp|Q9D0I8|MRT4_MOUSE mRNA turnover protein 4 homolog OS=Mus musculus GN=Mrto4 PE=2 SV=1;tr|A2AMV1|A2AMV1_MOUSE RIKEN cDNA 2610012O22, isoform CRA_a OS=Mus musculus GN=Mrto4 PE=3 SV=1;t	3451300000	3073600000	3023600000	561680000	203020000	180800000	177860000	5008000000	4786900000	4542800000	12	12	12	49.4	49.4	49.4	27.545	0	32.8	9548500000	63	11	11	11	11	11	11	11	11	11	21	24	18
221	A2AMY5;Q91VX2;F6PYV5;A2AMY7;F6WTC8	A2AMY5;Q91VX2	Ubiquitin-associated protein 2	Ubap2	tr|A2AMY5|A2AMY5_MOUSE Ubiquitin-associated protein 2 OS=Mus musculus GN=Ubap2 PE=1 SV=1;sp|Q91VX2|UBAP2_MOUSE Ubiquitin-associated protein 2 OS=Mus musculus GN=Ubap2 PE=1 SV=1	1529900000	1449200000	1306600000	129870000	46361000	43916000	39593000	2122600000	2179100000	2085600000	18	18	18	28.2	28.2	28.2	117.83	0	94.931	4285700000	51	16	12	14	16	12	14	16	12	14	16	17	18
222	A2AMZ4	A2AMZ4	Uncharacterized protein C17orf89 homolog		sp|A2AMZ4|CQ089_MOUSE Uncharacterized protein C17orf89 homolog OS=Mus musculus PE=4 SV=1	46465000	167110000	110380000	53992000	7744100	27852000	18396000	173230000	209600000	114650000	1	1	1	24.3	24.3	24.3	7.7849	0	3.87	323950000	7	1	1	1	1	1	1	1	1	1	1	3	3
223	A2AN08-3;A2AN08;A2AN08-5;A2AN08-2;Z4YMA7;F6SSP6;A2VCS3;A2AN08-4;Z4YLP1	A2AN08-3;A2AN08;A2AN08-5	E3 ubiquitin-protein ligase UBR4	Ubr4	sp|A2AN08-3|UBR4_MOUSE Isoform 3 of E3 ubiquitin-protein ligase UBR4 OS=Mus musculus GN=Ubr4;sp|A2AN08|UBR4_MOUSE E3 ubiquitin-protein ligase UBR4 OS=Mus musculus GN=Ubr4 PE=1 SV=1;sp|A2AN08-5|UBR4_MOUSE Isoform 5 of E3 ubiquitin-protein ligase UBR4 OS=Mus	8906200000	8477500000	8123900000	96619000	33735000	32112000	30772000	13478000000	14008000000	12906000000	122	122	122	35.6	35.6	35.6	570.29	0	323.31	25508000000	413	98	93	93	98	93	93	98	93	93	133	140	140
224	Q70KX6;Q3UUV0;Q3TMV1;Q3TXU6;A2AN61;Q8VEH2;Q6GQU3;Q8BIT2;F6XWQ4;F7D5G9;F6S5B6;Q9CUW6;F7AT58;F6Q3Z1;F7BM53	Q70KX6;Q3UUV0;Q3TMV1;Q3TXU6;A2AN61;Q8VEH2;Q6GQU3;Q8BIT2;F6XWQ4		Ciz1	tr|Q70KX6|Q70KX6_MOUSE Cip1-interacting zinc-finger protein OS=Mus musculus GN=Ciz1 PE=2 SV=1;tr|Q3UUV0|Q3UUV0_MOUSE Protein Ciz1 OS=Mus musculus GN=Ciz1 PE=2 SV=1;tr|Q3TMV1|Q3TMV1_MOUSE Putative uncharacterized protein OS=Mus musculus GN=Ciz1 PE=2 SV=1;tr	149280000	172750000	162290000	16144000	4976100	5758300	5409700	305460000	342440000	357400000	8	8	8	16.4	16.4	16.4	78.019	0	13.478	484320000	21	4	6	6	4	6	6	4	6	6	5	7	9
225	Q80YU9;A2AN96;O88851	Q80YU9;A2AN96;O88851	Putative hydrolase RBBP9	Rbbp9	tr|Q80YU9|Q80YU9_MOUSE Retinoblastoma binding protein 9 OS=Mus musculus GN=Rbbp9 PE=2 SV=1;tr|A2AN96|A2AN96_MOUSE Retinoblastoma binding protein 9 OS=Mus musculus GN=Rbbp9 PE=2 SV=1;sp|O88851|RBBP9_MOUSE Putative hydrolase RBBP9 OS=Mus musculus GN=Rbbp9 PE	671570000	652140000	647330000	164250000	55964000	54345000	53944000	1302700000	1261700000	1294300000	7	7	7	60.8	60.8	60.8	20.912	0	19.142	1971000000	20	5	5	5	5	5	5	5	5	5	6	6	8
226	J3QMC5;A2ANY6;Q3TPE2;Q5U481;Q6R5G2;Q8CAR9;Q497I1;Q6IQZ8	J3QMC5;A2ANY6		Mdn1	tr|J3QMC5|J3QMC5_MOUSE Midasin OS=Mus musculus GN=Mdn1 PE=1 SV=1;tr|A2ANY6|A2ANY6_MOUSE Midasin OS=Mus musculus GN=Mdn1 PE=1 SV=1	1139500000	924590000	906720000	9401300	3606000	2925900	2869400	1826300000	2028500000	2109200000	48	48	47	12	12	11.9	629.58	0	98.254	2970800000	98	33	31	29	33	31	29	32	30	29	34	31	33
227	A2AP32;A2AP31;Q3UIU2	A2AP32;A2AP31;Q3UIU2	NADH dehydrogenase [ubiquinone] 1 beta subcomplex subunit 6	Ndufb6	tr|A2AP32|A2AP32_MOUSE NADH dehydrogenase [ubiquinone] 1 beta subcomplex subunit 6 OS=Mus musculus GN=Ndufb6 PE=1 SV=1;tr|A2AP31|A2AP31_MOUSE MCG9810 OS=Mus musculus GN=Ndufb6 PE=2 SV=1;sp|Q3UIU2|NDUB6_MOUSE NADH dehydrogenase [ubiquinone] 1 beta subcomple	112820000	18554000	78819000	23355000	12536000	2061500	8757700	138110000	104260000	148860000	3	3	3	34	34	34	11.741	0	15.739	210190000	8	3	1	2	3	1	2	3	1	2	4	1	3
228	I7HJQ8;A2AP74;Q8BIF0-2;Q8BIF0	I7HJQ8;A2AP74;Q8BIF0-2;Q8BIF0	CD99 antigen-like protein 2	Cd99l2	tr|I7HJQ8|I7HJQ8_MOUSE CD99 antigen-like protein 2 OS=Mus musculus GN=Cd99l2 PE=4 SV=1;tr|A2AP74|A2AP74_MOUSE CD99 antigen-like protein 2 OS=Mus musculus GN=Cd99l2 PE=4 SV=1;sp|Q8BIF0-2|C99L2_MOUSE Isoform 2 of CD99 antigen-like protein 2 OS=Mus musculus G	90055000	83652000	72736000	24644000	9005500	8365200	7273600	90055000	87298000	76760000	1	1	1	9.5	9.5	9.5	20.092	0	6.9757	246440000	3	1	1	1	1	1	1	1	1	1	1	1	1
229	A2AP78;Q544R9;G5E920;O54879	A2AP78;Q544R9;G5E920;O54879	High mobility group protein B3	Hmgb3	tr|A2AP78|A2AP78_MOUSE High mobility group protein B3 (Fragment) OS=Mus musculus GN=Hmgb3 PE=4 SV=1;tr|Q544R9|Q544R9_MOUSE High mobility group box 3 OS=Mus musculus GN=Hmgb3 PE=2 SV=1;tr|G5E920|G5E920_MOUSE MCG114640 OS=Mus musculus GN=Gm6104 PE=4 SV=1;sp|	2390900000	1882300000	1701200000	663820000	265650000	209140000	189020000	3019900000	3649000000	3793200000	5	5	5	26.4	26.4	26.4	18.311	0	23.062	5974400000	27	5	3	2	5	3	2	5	3	2	13	8	6
230	Q9CT36;A2APB8;Q8BTJ3	Q9CT36;A2APB8;Q8BTJ3	Targeting protein for Xklp2	Tpx2	tr|Q9CT36|Q9CT36_MOUSE Putative uncharacterized protein (Fragment) OS=Mus musculus GN=Tpx2 PE=2 SV=1;sp|A2APB8|TPX2_MOUSE Targeting protein for Xklp2 OS=Mus musculus GN=Tpx2 PE=1 SV=1;tr|Q8BTJ3|Q8BTJ3_MOUSE Putative uncharacterized protein OS=Mus musculus	4269100000	3932800000	3140800000	257790000	97025000	89383000	71382000	6538000000	6550600000	5667600000	31	31	31	44.3	44.3	44.3	80.09	0	143.97	11343000000	132	27	25	27	27	25	27	27	25	27	45	43	44
231	Q9CSV7;Q7TMS8;A2API1;Q544H6;Q9Z238;A0JLN2;B2RS11;Q61457	Q9CSV7;Q7TMS8;A2API1;Q544H6;Q9Z238;A0JLN2;B2RS11;Q61457	G1/S-specific cyclin-E2;G1/S-specific cyclin-E1	Ccne2;Ccne1	tr|Q9CSV7|Q9CSV7_MOUSE Putative uncharacterized protein (Fragment) OS=Mus musculus GN=Ccne2 PE=2 SV=1;tr|Q7TMS8|Q7TMS8_MOUSE Cyclin E2 OS=Mus musculus GN=Ccne2 PE=2 SV=1;tr|A2API1|A2API1_MOUSE Cyclin E2, isoform CRA_a OS=Mus musculus GN=Ccne2 PE=3 SV=1;tr|	0	93793000	60700000	9655800	0	5862100	3793700	0	101310000	100770000	2	2	2	6.7	6.7	6.7	34.552	0.0037292	1.8237	154490000	3	0	2	1	0	2	1	0	2	1	0	2	1
232	A2API3;Q80V86	A2API3;Q80V86	Integrator complex subunit 8	Ints8	tr|A2API3|A2API3_MOUSE Integrator complex subunit 8 OS=Mus musculus GN=Ints8 PE=4 SV=1;sp|Q80V86|INT8_MOUSE Integrator complex subunit 8 OS=Mus musculus GN=Ints8 PE=2 SV=1	532640000	214760000	414110000	22337000	10243000	4130000	7963600	786200000	584300000	813510000	12	12	12	17.5	17.5	17.5	111.38	0	33.114	1161500000	29	9	6	10	9	6	10	9	6	10	12	7	10
233	E9Q202;A2API5;Q9JI18	E9Q202;A2API5;Q9JI18	Low-density lipoprotein receptor-related protein 1B	Lrp1b	tr|E9Q202|E9Q202_MOUSE Low-density lipoprotein receptor-related protein 1B OS=Mus musculus GN=Lrp1b PE=4 SV=2;tr|A2API5|A2API5_MOUSE Low-density lipoprotein receptor-related protein 1B OS=Mus musculus GN=Lrp1b PE=4 SV=1;sp|Q9JI18|LRP1B_MOUSE Low-density li	1138500000	957820000	962350000	16357000	6088500	5122100	5146200	1997200000	1754700000	2096800000	3	2	2	0.8	0.6	0.6	376.33	0.0061928	1.5599	3058700000	7	2	2	3	2	2	2	2	2	2	3	2	2
234	Q3UNN2;Q3U8S1;Q3U468;A2APM5;A2APM3;A2APM4;E9QKM8;Q80X37;A2APM1;A2APM2;P15379-2;P15379-3;P15379-6;P15379-11;P15379-5;P15379-10;P15379-9;P15379-4;P15379-8;P15379-7;P15379;Q3TLT9;P15379-12;P15379-13	Q3UNN2;Q3U8S1;Q3U468;A2APM5;A2APM3;A2APM4;E9QKM8;Q80X37;A2APM1;A2APM2;P15379-2;P15379-3;P15379-6;P15379-11;P15379-5;P15379-10;P15379-9;P15379-4;P15379-8;P15379-7;P15379;Q3TLT9	CD44 antigen	Cd44	tr|Q3UNN2|Q3UNN2_MOUSE Putative uncharacterized protein OS=Mus musculus GN=Cd44 PE=2 SV=1;tr|Q3U8S1|Q3U8S1_MOUSE CD44 antigen OS=Mus musculus GN=Cd44 PE=1 SV=1;tr|Q3U468|Q3U468_MOUSE Putative uncharacterized protein OS=Mus musculus GN=Cd44 PE=2 SV=1;tr|A2A	5195700000	5155000000	3357500000	913870000	346380000	343660000	223830000	5422200000	5459900000	5029300000	10	10	10	27.4	27.4	27.4	40.247	0	93.56	13708000000	49	9	9	10	9	9	10	9	9	10	19	17	13
235	Q8K1K8;A2APR8;O08901;Q9CS10;Q8C4D0	Q8K1K8;A2APR8;O08901	Mitotic checkpoint serine/threonine-protein kinase BUB1	Bub1	tr|Q8K1K8|Q8K1K8_MOUSE Budding uninhibited by benzimidazoles 1 homolog (S. cerevisiae) OS=Mus musculus GN=Bub1 PE=2 SV=1;tr|A2APR8|A2APR8_MOUSE Mitotic checkpoint serine/threonine-protein kinase BUB1 OS=Mus musculus GN=Bub1 PE=4 SV=1;sp|O08901|BUB1_MOUSE M	272210000	151750000	280920000	12366000	4775600	2662400	4928400	489360000	358290000	469620000	10	10	10	16.8	16.8	16.8	119.7	0	45.75	704880000	23	7	5	9	7	5	9	7	5	9	8	5	10
236	F8VPR2;A2APV2;E9PXE6;A2APV2-2;A2APV2-3;F6XR20;A2AQW2;Q6P247;Q8BI52;A2AB60;Q9JL26-2;Q9JL26	F8VPR2;A2APV2;E9PXE6;A2APV2-2;A2APV2-3	Formin-like protein 2	Fmnl2	tr|F8VPR2|F8VPR2_MOUSE Formin-like protein 2 OS=Mus musculus GN=Fmnl2 PE=4 SV=1;sp|A2APV2|FMNL2_MOUSE Formin-like protein 2 OS=Mus musculus GN=Fmnl2 PE=2 SV=2;tr|E9PXE6|E9PXE6_MOUSE Formin-like protein 2 OS=Mus musculus GN=Fmnl2 PE=4 SV=2;sp|A2APV2-2|FMNL2	297430000	50897000	112110000	6771200	4374000	748490	1648700	308450000	176160000	165800000	16	9	9	14.8	8.6	8.6	122.91	0	8.9007	460440000	13	12	7	9	7	2	5	7	2	5	7	2	4
237	B2RXU2;A2APY6;Q3V1V3;Q8BK69;Q8BM03;Q9D801;Q8K089	B2RXU2;A2APY6;Q3V1V3	ESF1 homolog	Esf1	tr|B2RXU2|B2RXU2_MOUSE ESF1, nucleolar pre-rRNA processing protein, homolog (S. cerevisiae) OS=Mus musculus GN=Esf1 PE=2 SV=1;tr|A2APY6|A2APY6_MOUSE ESF1, nucleolar pre-rRNA processing protein, homolog (S. cerevisiae) OS=Mus musculus GN=Esf1 PE=2 SV=1;sp|Q	491500000	341000000	460080000	30060000	11430000	7930200	10699000	554120000	645860000	770180000	14	14	14	17.9	17.9	17.9	98.042	0	25.095	1292600000	34	12	8	10	12	8	10	12	8	10	14	9	11
238	A2APY7;A2APY7-2	A2APY7	NADH dehydrogenase [ubiquinone] 1 alpha subcomplex assembly factor 5	Ndufaf5	sp|A2APY7|NDUF5_MOUSE NADH dehydrogenase [ubiquinone] 1 alpha subcomplex assembly factor 5 OS=Mus musculus GN=Ndufaf5 PE=2 SV=1	207350000	219770000	380100000	38439000	9873700	10465000	18100000	593300000	471320000	449260000	4	4	4	15.7	15.7	15.7	38.404	0	9.3596	807220000	16	2	3	4	2	3	4	2	3	4	3	6	7
239	A2AQ07	A2AQ07	Tubulin beta-1 chain	Tubb1	sp|A2AQ07|TBB1_MOUSE Tubulin beta-1 chain OS=Mus musculus GN=Tubb1 PE=1 SV=1	0	0	24162000	1150500	0	0	1150500	0	0	31846000	7	1	1	18.6	6	6	50.44	1	-2	24162000	1	5	5	7	0	0	1	0	0	1	0	0	1
240	A2AQ14	A2AQ14	Protein Mis18-beta	Oip5	sp|A2AQ14|MS18B_MOUSE Protein Mis18-beta OS=Mus musculus GN=Oip5 PE=2 SV=1	12656000	16469000	0	1820300	790980	1029300	0	23408000	35216000	0	2	2	2	7.5	7.5	7.5	26.861	0.0011799	2.2182	29125000	4	2	2	0	2	2	0	2	2	0	2	2	0
241	A2AQ17;Q9CWX2	A2AQ17;Q9CWX2	Complex I intermediate-associated protein 30, mitochondrial	Ndufaf1	tr|A2AQ17|A2AQ17_MOUSE Complex I intermediate-associated protein 30, mitochondrial OS=Mus musculus GN=Ndufaf1 PE=4 SV=1;sp|Q9CWX2|CIA30_MOUSE Complex I intermediate-associated protein 30, mitochondrial OS=Mus musculus GN=Ndufaf1 PE=2 SV=2	197470000	331770000	287370000	34026000	8228100	13824000	11974000	333280000	468420000	431100000	7	7	7	22.6	22.6	22.6	37.782	0	12.204	816620000	15	5	5	5	5	5	5	5	5	5	2	6	7
242	A2AQ19;Q3UXG8	A2AQ19;Q3UXG8	RNA polymerase-associated protein RTF1 homolog	Rtf1	sp|A2AQ19|RTF1_MOUSE RNA polymerase-associated protein RTF1 homolog OS=Mus musculus GN=Rtf1 PE=1 SV=1;tr|Q3UXG8|Q3UXG8_MOUSE Putative uncharacterized protein (Fragment) OS=Mus musculus GN=Rtf1 PE=2 SV=1	339120000	536510000	625680000	35745000	8074200	12774000	14897000	594300000	690840000	709800000	9	9	9	13.3	13.3	13.3	80.796	0	23.457	1501300000	28	5	6	8	5	6	8	5	6	8	8	10	10
243	A2AQA7;Q8CFQ3;REV__B9EKN1	A2AQA7;Q8CFQ3	Intron-binding protein aquarius	Aqr	tr|A2AQA7|A2AQA7_MOUSE Intron-binding protein aquarius OS=Mus musculus GN=Aqr PE=4 SV=1;sp|Q8CFQ3|AQR_MOUSE Intron-binding protein aquarius OS=Mus musculus GN=Aqr PE=2 SV=2	2246600000	1573000000	1466100000	65255000	27735000	19420000	18100000	3438400000	3352500000	2998100000	32	32	31	36.6	36.6	36.1	161.85	0	175.79	5285700000	86	22	21	21	22	21	21	21	21	21	29	30	27
244	Q8C4G3;Q8C288;Q505G9;A2AQC3;Q6DI68;O70228	Q8C4G3;Q8C288;Q505G9;A2AQC3;Q6DI68;O70228	Phospholipid-transporting ATPase;Probable phospholipid-transporting ATPase IIA	Atp9a	tr|Q8C4G3|Q8C4G3_MOUSE Probable phospholipid-transporting ATPase IIA OS=Mus musculus GN=Atp9a PE=2 SV=1;tr|Q8C288|Q8C288_MOUSE ATPase, class II, type 9A, isoform CRA_c OS=Mus musculus GN=Atp9a PE=2 SV=1;tr|Q505G9|Q505G9_MOUSE ATPase, class II, type 9A OS=M	13163000	15494000	33319000	1087300	230930	271820	584540	36931000	55003000	77715000	2	2	2	2.4	2.4	2.4	116.42	0.00075369	2.4989	61976000	4	1	1	2	1	1	2	1	1	2	1	1	2
245	A2AQD5;Q922B9;A2AQD6;Q922B9-3;Q3TEM8;Q922B9-2	A2AQD5;Q922B9;A2AQD6;Q922B9-3;Q3TEM8	Sperm-specific antigen 2 homolog	Ssfa2	tr|A2AQD5|A2AQD5_MOUSE Sperm-specific antigen 2 homolog OS=Mus musculus GN=Ssfa2 PE=1 SV=1;sp|Q922B9|SSFA2_MOUSE Sperm-specific antigen 2 homolog OS=Mus musculus GN=Ssfa2 PE=1 SV=3;tr|A2AQD6|A2AQD6_MOUSE Sperm-specific antigen 2 homolog OS=Mus musculus GN=	398980000	350650000	329850000	16112000	5955000	5233600	4923200	566340000	663730000	525950000	10	10	10	13.3	13.3	13.3	134.67	0	55.902	1079500000	24	8	7	9	8	7	9	8	7	9	7	8	9
246	A2AQE2;Q6A098;Q6IR00;F6QQ13;Q3TEC4;Q501P3;Q8C7M0	A2AQE2;Q6A098;Q6IR00;F6QQ13;Q3TEC4	Selenocysteine insertion sequence-binding protein 2-like	Secisbp2l	tr|A2AQE2|A2AQE2_MOUSE SECIS binding protein 2-like OS=Mus musculus GN=Secisbp2l PE=1 SV=1;sp|Q6A098|SBP2L_MOUSE Selenocysteine insertion sequence-binding protein 2-like OS=Mus musculus GN=Secisbp2l PE=1 SV=2;tr|Q6IR00|Q6IR00_MOUSE Secisbp2l protein (Fragm	123440000	85977000	80571000	5799700	2468700	1719500	1611400	160830000	168570000	172800000	8	8	8	10.4	10.4	10.4	119.75	0	12.323	289980000	17	5	5	4	5	5	4	5	5	4	5	5	7
247	A2AQJ7;A2AQJ5;A2AQJ6;Q8BXN9-3;Q8BXN9;Q8BXN9-2	A2AQJ7;A2AQJ5;A2AQJ6;Q8BXN9-3;Q8BXN9;Q8BXN9-2	Transmembrane protein 87A	Tmem87a	tr|A2AQJ7|A2AQJ7_MOUSE Transmembrane protein 87A OS=Mus musculus GN=Tmem87a PE=4 SV=1;tr|A2AQJ5|A2AQJ5_MOUSE Transmembrane protein 87A OS=Mus musculus GN=Tmem87a PE=1 SV=1;tr|A2AQJ6|A2AQJ6_MOUSE Transmembrane protein 87A OS=Mus musculus GN=Tmem87a PE=1 SV=	132000000	119680000	225510000	18354000	5077000	4603200	8673600	199100000	170220000	211940000	8	8	8	15.4	15.4	15.4	57.011	0	14.713	477200000	15	4	3	6	4	3	6	4	3	6	5	3	7
248	A2AQL0;Q9Z1W9;G1JLS7;Q3V256;Q3TR01	A2AQL0;Q9Z1W9;G1JLS7	STE20/SPS1-related proline-alanine-rich protein kinase	Stk39	tr|A2AQL0|A2AQL0_MOUSE Serine/threonine kinase 39, STE20/SPS1 homolog (Yeast) OS=Mus musculus GN=Stk39 PE=4 SV=1;sp|Q9Z1W9|STK39_MOUSE STE20/SPS1-related proline-alanine-rich protein kinase OS=Mus musculus GN=Stk39 PE=1 SV=1;tr|G1JLS7|G1JLS7_MOUSE Kidney-s	551510000	441120000	415530000	56326000	22060000	17645000	16621000	815750000	808070000	611290000	11	9	9	25.9	23.2	23.2	60.319	0	39.464	1408200000	23	8	8	9	7	7	8	7	7	8	8	7	8
249	Q8N9U3;Q8C1A8;Q8C141;Q8C113;A2AQN5;A2AQN4;Q9QXG4;D6RHA7;Q8BY91	Q8N9U3;Q8C1A8;Q8C141;Q8C113;A2AQN5;A2AQN4;Q9QXG4	Acetyl-coenzyme A synthetase, cytoplasmic	Acss2	tr|Q8N9U3|Q8N9U3_MOUSE cDNA fis, clone TRACH2001275, highly similar to Mus musculus acetyl-CoA synthetase mRNA OS=Mus musculus GN=Acss2 PE=2 SV=1;tr|Q8C1A8|Q8C1A8_MOUSE Putative uncharacterized protein OS=Mus musculus GN=Acss2 PE=2 SV=1;tr|Q8C141|Q8C141_MO	239370000	73358000	231410000	16489000	7253500	2223000	7012400	369150000	364960000	390580000	5	5	5	9.8	9.8	9.8	78.82	0	10.701	544130000	9	4	1	3	4	1	3	4	1	3	3	1	5
250	A2AQP0	A2AQP0	Myosin-7B	Myh7b	sp|A2AQP0|MYH7B_MOUSE Myosin-7B OS=Mus musculus GN=Myh7b PE=3 SV=1	406620000	0	0	3152100	3152100	0	0	720520000	0	0	3	1	1	1.2	0.4	0.4	221.49	1	-2	406620000	1	2	2	2	1	0	0	1	0	0	1	0	0
251	Q9R1W4;A2AQQ8;Q3TYI4;A2VCP6;A2VCP5;F6R7A2;Q9QZB6-2;Q06219-2;Q06219;Q9QZB6	Q9R1W4;A2AQQ8;Q3TYI4;A2VCP6;A2VCP5;F6R7A2;Q9QZB6-2;Q06219-2;Q06219;Q9QZB6	Nuclear receptor subfamily 4 group A member 3;Nuclear receptor subfamily 4 group A member 2	Nr4a2;Nr4a3	tr|Q9R1W4|Q9R1W4_MOUSE Nuclear receptor subfamily 4 group A member 2 OS=Mus musculus GN=Nr4a2 PE=2 SV=1;tr|A2AQQ8|A2AQQ8_MOUSE Nuclear receptor subfamily 4 group A member 2 OS=Mus musculus GN=Nr4a2 PE=3 SV=1;tr|Q3TYI4|Q3TYI4_MOUSE Nuclear receptor subfamil	0	0	0	0	0	0	0	0	0	0	1	1	1	3.6	3.6	3.6	43.675	1	-2	0	0	1	1	0	1	1	0	1	1	0	0	0	0
252	A2AQR0;Q64521	A2AQR0;Q64521	Glycerol-3-phosphate dehydrogenase;Glycerol-3-phosphate dehydrogenase, mitochondrial	Gpd2	tr|A2AQR0|A2AQR0_MOUSE Glycerol-3-phosphate dehydrogenase, mitochondrial OS=Mus musculus GN=Gpd2 PE=1 SV=1;sp|Q64521|GPDM_MOUSE Glycerol-3-phosphate dehydrogenase, mitochondrial OS=Mus musculus GN=Gpd2 PE=1 SV=2	6315600000	5715800000	5100300000	349630000	128890000	116650000	104090000	8821400000	9828500000	8787100000	41	41	41	65.8	65.8	65.8	82.829	0	253.16	17132000000	172	34	36	36	34	36	36	34	36	36	54	58	60
253	A2AQT8;A2AQT7;Q99LS1	A2AQT8;A2AQT7;Q99LS1	Methylmalonic aciduria and homocystinuria type D homolog, mitochondrial	Mmadhc	tr|A2AQT8|A2AQT8_MOUSE Methylmalonic aciduria and homocystinuria type D homolog, mitochondrial (Fragment) OS=Mus musculus GN=Mmadhc PE=4 SV=1;tr|A2AQT7|A2AQT7_MOUSE Methylmalonic aciduria and homocystinuria type D homolog, mitochondrial (Fragment) OS=Mus m	32195000	0	15772000	5329700	3577200	0	1752500	42735000	0	0	3	3	3	24.6	24.6	24.6	19.807	0.00015425	2.837	47967000	2	2	0	1	2	0	1	2	0	1	2	0	0
254	A2AQU8;Q9D975	A2AQU8;Q9D975	Sulfiredoxin-1	Srxn1	tr|A2AQU8|A2AQU8_MOUSE Sulfiredoxin OS=Mus musculus GN=Srxn1 PE=3 SV=1;sp|Q9D975|SRXN1_MOUSE Sulfiredoxin-1 OS=Mus musculus GN=Srxn1 PE=2 SV=1	67084000	36259000	0	10334000	6708400	3625900	0	128130000	77097000	0	2	2	2	40.6	40.6	40.6	16.063	0	3.4146	103340000	4	2	1	0	2	1	0	2	1	0	3	1	0
255	A2AQZ7;Q9DB26;A2AQZ5;A2AQZ2;B7ZNN8;D6RIQ3;D6RI61	A2AQZ7;Q9DB26;A2AQZ5;A2AQZ2;B7ZNN8;D6RIQ3;D6RI61	Phytanoyl-CoA dioxygenase domain-containing protein 1	Phyhd1	tr|A2AQZ7|A2AQZ7_MOUSE Phytanoyl-CoA dioxygenase domain-containing protein 1 OS=Mus musculus GN=Phyhd1 PE=4 SV=1;sp|Q9DB26|PHYD1_MOUSE Phytanoyl-CoA dioxygenase domain-containing protein 1 OS=Mus musculus GN=Phyhd1 PE=2 SV=2;tr|A2AQZ5|A2AQZ5_MOUSE Phytanoy	135730000	133610000	136000000	28953000	9694700	9543400	9714600	210770000	228170000	192690000	5	5	5	29.3	29.3	29.3	30.155	0	18.639	405340000	11	3	4	4	3	4	4	3	4	4	4	4	3
256	Q80VC1;Q05CC5;Q504N1;Q05DE4;B2RWT5;A2AR02;A2AR01;Q3UZ38	Q80VC1;Q05CC5;Q504N1;Q05DE4;B2RWT5;A2AR02;A2AR01;Q3UZ38	Peptidyl-prolyl cis-trans isomerase;Peptidyl-prolyl cis-trans isomerase G	Ppig	tr|Q80VC1|Q80VC1_MOUSE Peptidyl-prolyl cis-trans isomerase (Fragment) OS=Mus musculus GN=Ppig PE=2 SV=1;tr|Q05CC5|Q05CC5_MOUSE Ppig protein (Fragment) OS=Mus musculus GN=Ppig PE=2 SV=1;tr|Q504N1|Q504N1_MOUSE Ppig protein (Fragment) OS=Mus musculus GN=Ppig	744410000	955580000	657620000	168400000	53172000	68256000	46973000	1438200000	1633700000	1352500000	7	7	7	47.6	47.6	47.6	21.109	0	14.414	2357600000	17	6	6	5	6	6	5	6	6	5	6	6	5
257	A2AR12;Q8BKH7-2;Q8BKH7;A2AR15;Q8BKH7-3	A2AR12;Q8BKH7-2;Q8BKH7;A2AR15;Q8BKH7-3	Target of rapamycin complex 2 subunit MAPKAP1	Mapkap1	tr|A2AR12|A2AR12_MOUSE Target of rapamycin complex 2 subunit MAPKAP1 (Fragment) OS=Mus musculus GN=Mapkap1 PE=4 SV=1;sp|Q8BKH7-2|SIN1_MOUSE Isoform 2 of Target of rapamycin complex 2 subunit MAPKAP1 OS=Mus musculus GN=Mapkap1;sp|Q8BKH7|SIN1_MOUSE Target of	208430000	122670000	82302000	14764000	7443900	4381100	2939400	285180000	307390000	246670000	7	7	7	19.7	19.7	19.7	58.608	0	17.209	413400000	11	5	4	5	5	4	5	5	4	5	5	3	3
258	Q8BXT6;F6XM46;B0R0D5;B0R0D4;A2AR56;Q6P5H6-4;Q6P5H6-3;Q6P5H6-2;Q6P5H6;Q8BX61;Q8BW31;F6XLQ6;F2Z484	Q8BXT6;F6XM46;B0R0D5;B0R0D4;A2AR56;Q6P5H6-4;Q6P5H6-3;Q6P5H6-2;Q6P5H6;Q8BX61;Q8BW31	FERM domain-containing protein 5	Frmd5	tr|Q8BXT6|Q8BXT6_MOUSE Putative uncharacterized protein OS=Mus musculus GN=Frmd5 PE=2 SV=1;tr|F6XM46|F6XM46_MOUSE FERM domain-containing protein 5 (Fragment) OS=Mus musculus GN=Frmd5 PE=4 SV=1;tr|B0R0D5|B0R0D5_MOUSE FERM domain-containing protein 5 (Fragme	28792000	1695500	51221000	3026300	1066400	62795	1897100	66048000	0	117590000	6	6	6	21.5	21.5	21.5	46.741	0	3.6246	81709000	8	3	2	3	3	2	3	3	2	3	3	2	3
259	A2ARA8;G3UYN5;A2ARA8-2;G3UYV5	A2ARA8;G3UYN5	Integrin alpha-8;Integrin alpha-8 heavy chain;Integrin alpha-8 light chain	Itga8	sp|A2ARA8|ITA8_MOUSE Integrin alpha-8 OS=Mus musculus GN=Itga8 PE=1 SV=1;tr|G3UYN5|G3UYN5_MOUSE Integrin alpha-8 OS=Mus musculus GN=Itga8 PE=3 SV=1	768510000	741030000	672870000	43648000	15370000	14821000	13457000	1196800000	1472200000	1099600000	10	10	10	12.7	12.7	12.7	117.55	0	29.023	2182400000	24	7	6	7	7	6	7	7	6	7	10	7	7
260	H3BKT7;A2ARC1;Q91WG3;H3BLS1	H3BKT7;A2ARC1;Q91WG3;H3BLS1	Probable tRNA pseudouridine synthase 2	Trub2	tr|H3BKT7|H3BKT7_MOUSE Probable tRNA pseudouridine synthase 2 OS=Mus musculus GN=Trub2 PE=4 SV=1;tr|A2ARC1|A2ARC1_MOUSE Probable tRNA pseudouridine synthase 2 OS=Mus musculus GN=Trub2 PE=4 SV=1;sp|Q91WG3|TRUB2_MOUSE Probable tRNA pseudouridine synthase 2 O	120150000	0	182690000	20189000	8009900	0	12179000	150440000	0	219040000	3	3	3	17	17	17	21.122	0	3.4998	302830000	4	2	0	2	2	0	2	2	0	2	2	0	2
261	A2ARP8;Q9QYR6;Q9QYR6-2	A2ARP8;Q9QYR6;Q9QYR6-2	Microtubule-associated protein 1A;MAP1A heavy chain;MAP1 light chain LC2	Map1a	tr|A2ARP8|A2ARP8_MOUSE Microtubule-associated protein 1A OS=Mus musculus GN=Map1a PE=1 SV=1;sp|Q9QYR6|MAP1A_MOUSE Microtubule-associated protein 1A OS=Mus musculus GN=Map1a PE=1 SV=2;sp|Q9QYR6-2|MAP1A_MOUSE Isoform 2 of Microtubule-associated protein 1A OS	2692000000	2567900000	2620400000	54725000	18695000	17832000	18198000	4637800000	4766800000	4844300000	44	43	43	26.9	26.6	26.6	325.88	0	123.17	7880300000	133	34	33	37	33	32	36	33	32	36	43	41	49
262	A2ARZ3	A2ARZ3	Fibrous sheath-interacting protein 2	Fsip2	sp|A2ARZ3|FSIP2_MOUSE Fibrous sheath-interacting protein 2 OS=Mus musculus GN=Fsip2 PE=1 SV=3	279760000	0	0	697650	697650	0	0	398260000	0	0	2	2	2	0.5	0.5	0.5	784.85	0.00015406	2.8219	279760000	1	2	1	0	2	1	0	2	1	0	1	0	0
263	A2AS05;A2AS03;E9QAM5;Q922U3;Q69ZA7;Q7TT03;Q3TZD5	A2AS05;A2AS03;E9QAM5;Q922U3;Q69ZA7	Helicase with zinc finger domain 2	Helz2;mKIAA1769	tr|A2AS05|A2AS05_MOUSE Helicase with zinc finger domain 2 OS=Mus musculus GN=Helz2 PE=4 SV=2;tr|A2AS03|A2AS03_MOUSE Helicase with zinc finger domain 2 OS=Mus musculus GN=Helz2 PE=4 SV=1;sp|E9QAM5|HELZ2_MOUSE Helicase with zinc finger domain 2 OS=Mus muscul	16644000	29903000	84316000	765280	97331	174870	493070	0	50660000	107890000	5	5	5	2.5	2.5	2.5	326.59	0	7.6075	130860000	5	2	1	3	2	1	3	2	1	3	2	1	2
264	A2AS45;Q68FH0-2;Q68FH0;Q3UIX3;A2AS44;Q05D18;A2AS47	A2AS45;Q68FH0-2;Q68FH0;Q3UIX3;A2AS44;Q05D18	Plakophilin-4	Pkp4	tr|A2AS45|A2AS45_MOUSE Plakophilin-4 OS=Mus musculus GN=Pkp4 PE=1 SV=1;sp|Q68FH0-2|PKP4_MOUSE Isoform 2 of Plakophilin-4 OS=Mus musculus GN=Pkp4;sp|Q68FH0|PKP4_MOUSE Plakophilin-4 OS=Mus musculus GN=Pkp4 PE=1 SV=1;tr|Q3UIX3|Q3UIX3_MOUSE Putative uncharacte	11732000	33382000	807810000	11684000	160710	457290	11066000	398790000	370920000	493330000	6	6	5	6.8	6.8	5.9	128.53	0	8.2166	852930000	12	2	5	5	2	5	5	2	4	4	2	4	6
265	A2AS70;Q5DTL6;O54826;Q8C7B0;A2AS72	A2AS70;Q5DTL6;O54826;Q8C7B0	Protein AF-10	Mllt10	tr|A2AS70|A2AS70_MOUSE Protein AF-10 OS=Mus musculus GN=Mllt10 PE=4 SV=1;tr|Q5DTL6|Q5DTL6_MOUSE MKIAA4140 protein (Fragment) OS=Mus musculus GN=Mllt10 PE=2 SV=1;sp|O54826|AF10_MOUSE Protein AF-10 OS=Mus musculus GN=Mllt10 PE=1 SV=2;tr|Q8C7B0|Q8C7B0_MOUSE P	30729000	53311000	14019000	3771500	1181900	2050400	539210	32691000	0	40888000	6	6	6	12.8	12.8	12.8	104.53	0	4.509	98059000	6	3	2	2	3	2	2	3	2	2	3	1	2
266	A2ASK1;Q7TS68	A2ASK1;Q7TS68	Putative methyltransferase NSUN6	Nsun6	tr|A2ASK1|A2ASK1_MOUSE Putative methyltransferase NSUN6 OS=Mus musculus GN=Nsun6 PE=4 SV=1;sp|Q7TS68|NSUN6_MOUSE Putative methyltransferase NSUN6 OS=Mus musculus GN=Nsun6 PE=2 SV=2	0	8984700	0	374360	0	374360	0	0	12251000	0	1	1	1	4.7	4.7	4.7	46.328	0.0010477	2.4181	8984700	1	0	1	0	0	1	0	0	1	0	0	1	0
267	A2ASR6;A2ASR7;A2ASR8;Q3ULL2;Q2LC58;P25916;P23798;A2ASR5	A2ASR6;A2ASR7;A2ASR8;Q3ULL2;Q2LC58;P25916;P23798	Polycomb complex protein BMI-1;Polycomb group RING finger protein 2	Bmi1;Pcgf2	tr|A2ASR6|A2ASR6_MOUSE Polycomb complex protein BMI-1 (Fragment) OS=Mus musculus GN=Bmi1 PE=4 SV=1;tr|A2ASR7|A2ASR7_MOUSE Polycomb complex protein BMI-1 (Fragment) OS=Mus musculus GN=Bmi1 PE=4 SV=1;tr|A2ASR8|A2ASR8_MOUSE Polycomb complex protein BMI-1 (Fra	88364000	185810000	126400000	66762000	14727000	30969000	21066000	132270000	191130000	169820000	3	3	3	24.8	24.8	24.8	12.248	0.00045386	2.5452	400570000	6	1	3	2	1	3	2	1	3	2	1	3	2
268	A2ASS6;E9Q8N1;E9Q8K5;A2ASS6-2;Q3TZL3;F7CR78;A2AT62;F6Q6Z0;Q812E1;F6RSJ3;A2AT70	A2ASS6;E9Q8N1;E9Q8K5;A2ASS6-2	Titin	Ttn	sp|A2ASS6|TITIN_MOUSE Titin OS=Mus musculus GN=Ttn PE=1 SV=1;tr|E9Q8N1|E9Q8N1_MOUSE Titin OS=Mus musculus GN=Ttn PE=1 SV=1;tr|E9Q8K5|E9Q8K5_MOUSE Titin OS=Mus musculus GN=Ttn PE=1 SV=1;sp|A2ASS6-2|TITIN_MOUSE Isoform 2 of Titin OS=Mus musculus GN=Ttn	576420000	982440000	721660000	970020	245180	417880	306960	1332300000	1018300000	1024900000	15	14	13	0.5	0.4	0.4	3906.4	0	5.6546	2280500000	29	8	5	12	7	4	11	6	3	10	10	6	13
269	Q505H1;Q05BL5;A2ASY1;Q5HZG4;Q8BKP6;A2ASY0	Q505H1;Q05BL5;A2ASY1;Q5HZG4	Transcription initiation factor TFIID subunit 3	Taf3	tr|Q505H1|Q505H1_MOUSE Taf3 protein (Fragment) OS=Mus musculus GN=Taf3 PE=2 SV=1;tr|Q05BL5|Q05BL5_MOUSE Taf3 protein (Fragment) OS=Mus musculus GN=Taf3 PE=2 SV=1;tr|A2ASY1|A2ASY1_MOUSE TAF3 RNA polymerase II, TATA box binding protein (TBP)-associated facto	54535000	66031000	562320000	23548000	1880500	2276900	19390000	310250000	517950000	181280000	3	3	3	7.1	7.1	7.1	62.239	0	5.9866	682880000	8	2	2	2	2	2	2	2	2	2	3	3	2
270	A2ASZ8-2;A2ASZ8-3;A2ASZ8;A2ASZ8-4;A2ASZ8-5;Z4YLR9;F6RC04;F6X0P2	A2ASZ8-2;A2ASZ8-3;A2ASZ8;A2ASZ8-4;A2ASZ8-5;Z4YLR9	Calcium-binding mitochondrial carrier protein SCaMC-2	Slc25a25	sp|A2ASZ8-2|SCMC2_MOUSE Isoform 2 of Calcium-binding mitochondrial carrier protein SCaMC-2 OS=Mus musculus GN=Slc25a25;sp|A2ASZ8-3|SCMC2_MOUSE Isoform 3 of Calcium-binding mitochondrial carrier protein SCaMC-2 OS=Mus musculus GN=Slc25a25;sp|A2ASZ8|SCMC2_MO	338910000	133080000	246580000	23952000	11297000	4435800	8219300	318130000	302540000	327360000	6	6	5	15.1	15.1	13.5	55.287	0	13.08	718560000	22	5	5	3	5	5	3	4	4	2	9	8	5
271	A2AT37;F6Q3G7	A2AT37		Upf2	tr|A2AT37|A2AT37_MOUSE Protein Upf2 OS=Mus musculus GN=Upf2 PE=2 SV=1	594900000	345280000	309460000	17356000	8262400	4795500	4298100	701420000	729500000	739460000	17	17	17	19.6	19.6	19.6	147.55	0	64.213	1249600000	38	15	8	8	15	8	8	15	8	8	17	10	11
272	Q3TG07;A2ATI9;Q3TX06;Q99JX3;Q3TIK1;Q99JX3-2;A2ATI8;A2ATI6;Q3V458;Q922I9	Q3TG07;A2ATI9;Q3TX06;Q99JX3;Q3TIK1;Q99JX3-2;A2ATI8;A2ATI6;Q3V458	Golgi reassembly-stacking protein 2	Gorasp2	tr|Q3TG07|Q3TG07_MOUSE Putative uncharacterized protein OS=Mus musculus GN=Gorasp2 PE=2 SV=1;tr|A2ATI9|A2ATI9_MOUSE Golgi reassembly stacking protein 2, isoform CRA_d OS=Mus musculus GN=Gorasp2 PE=1 SV=1;tr|Q3TX06|Q3TX06_MOUSE Putative uncharacterized prot	2064400000	1434400000	2659700000	410570000	137630000	95629000	177310000	2525900000	2732900000	3218400000	12	12	12	39	39	39	44.999	0	57.076	6158500000	45	9	9	9	9	9	9	9	9	9	12	14	19
273	A2ATL0;A2ATK9;A2ATK8	A2ATL0;A2ATK9;A2ATK8		Fam171a1	tr|A2ATL0|A2ATL0_MOUSE Protein Fam171a1 OS=Mus musculus GN=Fam171a1 PE=4 SV=1;tr|A2ATK9|A2ATK9_MOUSE Family with sequence similarity 171, member A1 OS=Mus musculus GN=Fam171a1 PE=2 SV=1;tr|A2ATK8|A2ATK8_MOUSE Protein Fam171a1 OS=Mus musculus GN=Fam171a1 PE	7915100	0	0	193050	193050	0	0	14784000	0	0	2	1	1	2.4	1.7	1.7	97.237	0.0041506	1.7906	7915100	0	1	1	0	1	0	0	1	0	0	0	0	0
274	A2ATN9;Q9ES70;A2ATP1	A2ATN9;Q9ES70	Serine/threonine-protein kinase Nek6	Nek6	tr|A2ATN9|A2ATN9_MOUSE Serine/threonine-protein kinase Nek6 OS=Mus musculus GN=Nek6 PE=4 SV=1;sp|Q9ES70|NEK6_MOUSE Serine/threonine-protein kinase Nek6 OS=Mus musculus GN=Nek6 PE=1 SV=1	39191000	22235000	17360000	3939300	1959600	1111700	867990	27244000	39914000	35521000	3	2	2	11.3	8.6	8.6	34.721	0.0011791	2.204	78786000	4	3	2	2	2	1	1	2	1	1	2	1	1
275	A2VCP7;A2AU35;Q8BHL8	A2VCP7;A2AU35;Q8BHL8	Proteasome inhibitor PI31 subunit	Psmf1	tr|A2VCP7|A2VCP7_MOUSE Psmf1 protein (Fragment) OS=Mus musculus GN=Psmf1 PE=2 SV=1;tr|A2AU35|A2AU35_MOUSE Proteasome (Prosome, macropain) inhibitor subunit 1 OS=Mus musculus GN=Psmf1 PE=2 SV=1;sp|Q8BHL8|PSMF1_MOUSE Proteasome inhibitor PI31 subunit OS=Mus	291750000	222770000	301490000	62770000	22442000	17136000	23191000	392790000	395080000	338530000	4	4	4	23.5	23.5	23.5	26.073	0	16.996	816010000	16	3	2	4	3	2	4	3	2	4	5	4	7
276	Q3U3F6;A2AU62;Q64012-2;Q64012;Q3TGD3;A2AU61;A2AU60	Q3U3F6;A2AU62;Q64012-2;Q64012;Q3TGD3;A2AU61;A2AU60	RNA-binding protein Raly	Raly	tr|Q3U3F6|Q3U3F6_MOUSE HnRNP-associated with lethal yellow, isoform CRA_f OS=Mus musculus GN=Raly PE=2 SV=1;tr|A2AU62|A2AU62_MOUSE RNA-binding protein Raly (Fragment) OS=Mus musculus GN=Raly PE=1 SV=1;sp|Q64012-2|RALY_MOUSE Isoform 1 of RNA-binding protein	7366000000	7723100000	6877500000	1156100000	387680000	406480000	361970000	9438401000	9898400000	9091200000	14	14	14	55.7	55.7	55.7	31.198	0	184.6	21967000000	97	12	12	13	12	12	13	12	12	13	29	33	35
277	F6ZS36;A2AU83	F6ZS36;A2AU83		Gm14139;Gm14124	tr|F6ZS36|F6ZS36_MOUSE Protein Gm14139 OS=Mus musculus GN=Gm14139 PE=4 SV=1;tr|A2AU83|A2AU83_MOUSE Protein Gm14124 OS=Mus musculus GN=Gm14124 PE=4 SV=1	0	0	0	0	0	0	0	0	0	0	1	1	1	2.4	2.4	2.4	57.889	1	-2	0	0	1	0	1	1	0	1	1	0	1	0	0	0
278	A2AU89;A2AU91;P70399-3;P70399;P70399-2;Q3V1P7;Q8C0U1;Q8BLA0;A2AU90;Q8BZ87;Q3UG49;F6ZRL3;F6QNC8;F6S5E4	A2AU89;A2AU91;P70399-3;P70399;P70399-2	Tumor suppressor p53-binding protein 1	Trp53bp1;Tp53bp1	tr|A2AU89|A2AU89_MOUSE Tumor suppressor p53-binding protein 1 OS=Mus musculus GN=Trp53bp1 PE=1 SV=2;tr|A2AU91|A2AU91_MOUSE Tumor suppressor p53-binding protein 1 OS=Mus musculus GN=Trp53bp1 PE=1 SV=1;sp|P70399-3|TP53B_MOUSE Isoform 3 of Tumor suppressor p5	1364200000	1167300000	1255200000	40283000	14513000	12418000	13353000	1709500000	1787200000	2120500000	29	29	29	26.9	26.9	26.9	207.65	0	116.76	3786600000	75	18	19	16	18	19	16	18	19	16	23	26	26
279	Q3TAI4;Q9CZ22;A2AUD5;Q9CYZ2;V9GWU5	Q3TAI4;Q9CZ22;A2AUD5;Q9CYZ2;V9GWU5	Tumor protein D54	Tpd52l2	tr|Q3TAI4|Q3TAI4_MOUSE Tumor protein D52-like 2, isoform CRA_c OS=Mus musculus GN=Tpd52l2 PE=1 SV=1;tr|Q9CZ22|Q9CZ22_MOUSE Putative uncharacterized protein OS=Mus musculus GN=Tpd52l2 PE=2 SV=1;tr|A2AUD5|A2AUD5_MOUSE Tumor protein D54 OS=Mus musculus GN=Tpd	2839100000	2622000000	2737500000	585620000	202790000	187290000	195540000	4509500000	4965600000	4400600000	12	12	3	61.7	61.7	13.6	22.466	0	125.77	8198600000	58	10	8	10	10	8	10	2	1	3	21	16	21
280	A2AUF7;B0R0S4;Q8VCH5;Q3U6R8;D6RGR6;D6RHN6	A2AUF7;B0R0S4;Q8VCH5;Q3U6R8	Rab9 effector protein with kelch motifs	Rabepk	tr|A2AUF7|A2AUF7_MOUSE Rab9 effector protein with kelch motifs OS=Mus musculus GN=Rabepk PE=4 SV=1;tr|B0R0S4|B0R0S4_MOUSE Rab9 effector protein with kelch motifs OS=Mus musculus GN=Rabepk PE=4 SV=1;sp|Q8VCH5|RABEK_MOUSE Rab9 effector protein with kelch mot	36587000	21421000	51220000	7281900	2439100	1428100	3414700	68738000	75822000	88048000	4	4	4	18.4	18.4	18.4	34.581	0	12.839	109230000	8	2	3	4	2	3	4	2	3	4	1	3	4
281	A2AUK8;A2AUK6;A2AUK7;B6ZHC9;A2AUK5;Q9Z2H5-3;Q9Z2H5-2;Q9Z2H5;Q8C8P2;B6ZHC4	A2AUK8;A2AUK6;A2AUK7;B6ZHC9;A2AUK5;Q9Z2H5-3;Q9Z2H5-2;Q9Z2H5;Q8C8P2	Band 4.1-like protein 1	Epb4.1l1;Epb41l1	tr|A2AUK8|A2AUK8_MOUSE Band 4.1-like protein 1 OS=Mus musculus GN=Epb4.1l1 PE=1 SV=1;tr|A2AUK6|A2AUK6_MOUSE Band 4.1-like protein 1 OS=Mus musculus GN=Epb4.1l1 PE=1 SV=1;tr|A2AUK7|A2AUK7_MOUSE Band 4.1-like protein 1 OS=Mus musculus GN=Epb4.1l1 PE=1 SV=1;t	1014500000	1100500000	1036200000	61787000	19892000	21578000	20317000	1916900000	1984000000	1644600000	19	18	7	29.6	28.3	11.1	96.852	0	47.401	3151100000	60	14	13	17	13	12	16	7	5	5	20	21	19
282	A2AUM0;Q9QZ05;A2AUM2;A2AUM1;Q9QZ05-2;Q9QZ05-3;Q9QZ05-4;A2AUL9;Q9QZ05-6;Q9QZ05-5	A2AUM0;Q9QZ05;A2AUM2;A2AUM1;Q9QZ05-2;Q9QZ05-3;Q9QZ05-4	Eukaryotic translation initiation factor 2-alpha kinase 4	Eif2ak4	tr|A2AUM0|A2AUM0_MOUSE Eukaryotic translation initiation factor 2-alpha kinase 4 OS=Mus musculus GN=Eif2ak4 PE=4 SV=1;sp|Q9QZ05|E2AK4_MOUSE Eukaryotic translation initiation factor 2-alpha kinase 4 OS=Mus musculus GN=Eif2ak4 PE=1 SV=2;tr|A2AUM2|A2AUM2_MOUS	368390000	249140000	306830000	10625000	4234400	2863600	3526800	534960000	488480000	494370000	17	17	17	13.9	13.9	13.9	186.5	0	25.312	924360000	23	10	6	10	10	6	10	10	6	10	9	5	9
283	A2AUT1;A2AUT3;A2AUT4;Q3UA16-2;Q3UA16	A2AUT1;A2AUT3;A2AUT4;Q3UA16-2;Q3UA16	Kinetochore protein Spc25	Spc25	tr|A2AUT1|A2AUT1_MOUSE Kinetochore protein Spc25 (Fragment) OS=Mus musculus GN=Spc25 PE=4 SV=1;tr|A2AUT3|A2AUT3_MOUSE Kinetochore protein Spc25 (Fragment) OS=Mus musculus GN=Spc25 PE=4 SV=1;tr|A2AUT4|A2AUT4_MOUSE Kinetochore protein Spc25 (Fragment) OS=Mus	52988000	64856000	49629000	20934000	6623500	8106900	6203600	66156000	159780000	83545000	1	1	1	8.3	8.3	8.3	15.675	0.0063176	1.5242	167470000	6	1	1	1	1	1	1	1	1	1	2	2	2
284	F6RK07;A2AUX5;A2AUX3;B7ZD29;Q3U2G7;Q3UHC7-2;Q3UHC7-4;Q3UHC7;Q3UHC7-3;Q52KF5;F6QQP6;D3Z6Z7;Q6KAS9;Q8C2K5;Q8C2K5-2	F6RK07;A2AUX5;A2AUX3;B7ZD29;Q3U2G7;Q3UHC7-2;Q3UHC7-4;Q3UHC7;Q3UHC7-3;Q52KF5;F6QQP6	Disabled homolog 2-interacting protein	Dab2ip	tr|F6RK07|F6RK07_MOUSE Disabled homolog 2-interacting protein (Fragment) OS=Mus musculus GN=Dab2ip PE=4 SV=1;tr|A2AUX5|A2AUX5_MOUSE Disabled homolog 2-interacting protein OS=Mus musculus GN=Dab2ip PE=4 SV=1;tr|A2AUX3|A2AUX3_MOUSE Disabled homolog 2-interac	248180000	102180000	176740000	7220600	3399800	1399700	2421100	311050000	360670000	307210000	10	10	8	15.6	15.6	13.6	119.53	0	22.502	527110000	16	5	4	8	5	4	8	4	3	7	4	6	6
285	A2AUY4;B9EKB5;Q8C0K4;Q69ZI8;Q3UGV3;A0PJF0;F6R4Y5	A2AUY4;B9EKB5;Q8C0K4;Q69ZI8;Q3UGV3		Baz2b	tr|A2AUY4|A2AUY4_MOUSE Protein Baz2b OS=Mus musculus GN=Baz2b PE=4 SV=1;tr|B9EKB5|B9EKB5_MOUSE Baz2b protein OS=Mus musculus GN=Baz2b PE=2 SV=1;tr|Q8C0K4|Q8C0K4_MOUSE Putative uncharacterized protein (Fragment) OS=Mus musculus GN=Baz2b PE=2 SV=1;tr|Q69ZI8|	28944000	63523000	42258000	1283100	275650	604990	402460	0	96074000	129630000	7	7	7	5.5	5.5	5.5	234	0	7.209	134730000	7	3	5	4	3	5	4	3	5	4	1	4	2
286	A2AVJ7;Q99PL5;Q6ZPS0;Q99PL5-10;Q99PL5-9;Q99PL5-8;Q99PL5-7;Q99PL5-6;Q99PL5-5;Q99PL5-4;Q99PL5-3;Q99PL5-2;Q99PL5-11;Q8C7E8;Q99PL5-12;Q3ULC0;Q8CAB9;Q3T9Z9-4	A2AVJ7;Q99PL5;Q6ZPS0	Ribosome-binding protein 1	Rrbp1	tr|A2AVJ7|A2AVJ7_MOUSE Ribosome-binding protein 1 OS=Mus musculus GN=Rrbp1 PE=1 SV=1;sp|Q99PL5|RRBP1_MOUSE Ribosome-binding protein 1 OS=Mus musculus GN=Rrbp1 PE=1 SV=2;tr|Q6ZPS0|Q6ZPS0_MOUSE MKIAA1398 protein (Fragment) OS=Mus musculus GN=Rrbp1 PE=2 SV=1	16955000000	17040000000	17774000000	446280000	146160000	146900000	153230000	22195000000	24600000000	23310000000	49	49	49	38.3	38.3	38.3	158.39	0	323.31	51769000000	236	43	43	42	43	43	42	43	43	42	78	76	82
287	A2AVP4;Q148V5;Q148V4;P0C090	A2AVP4;Q148V5;Q148V4;P0C090	Roquin-2	Rc3h2	tr|A2AVP4|A2AVP4_MOUSE Roquin-2 OS=Mus musculus GN=Rc3h2 PE=4 SV=1;tr|Q148V5|Q148V5_MOUSE Ring finger and CCCH-type zinc finger domains 2 OS=Mus musculus GN=Rc3h2 PE=2 SV=1;tr|Q148V4|Q148V4_MOUSE Ring finger and CCCH-type zinc finger domains 2 OS=Mus muscu	20443000	0	5001400	410400	329730	0	80668	49936000	0	0	2	2	2	2.1	2.1	2.1	124.71	0.0023229	1.9893	25445000	2	1	0	1	1	0	1	1	0	1	1	0	1
288	A2AW05;Q05DR5;Q08943;Q08943-2	A2AW05;Q05DR5;Q08943;Q08943-2	FACT complex subunit SSRP1	Ssrp1	tr|A2AW05|A2AW05_MOUSE FACT complex subunit SSRP1 (Fragment) OS=Mus musculus GN=Ssrp1 PE=1 SV=1;tr|Q05DR5|Q05DR5_MOUSE Ssrp1 protein (Fragment) OS=Mus musculus GN=Ssrp1 PE=2 SV=1;sp|Q08943|SSRP1_MOUSE FACT complex subunit SSRP1 OS=Mus musculus GN=Ssrp1 PE=	6910900000	6512500000	6836500000	547560000	186780000	176010000	184770000	11231000000	11575000000	11012000000	26	26	26	46.7	46.7	46.7	71.527	0	107.87	20260000000	125	22	24	26	22	24	26	22	24	26	40	42	43
289	B2RRC5;A2AWA9;A2AWA9-2;A2AWA7;A2AWA9-3;A2AWB0;A6H6A9-3	B2RRC5;A2AWA9;A2AWA9-2;A2AWA7	Rab GTPase-activating protein 1	Rabgap1	tr|B2RRC5|B2RRC5_MOUSE RAB GTPase activating protein 1 OS=Mus musculus GN=Rabgap1 PE=2 SV=1;sp|A2AWA9|RBGP1_MOUSE Rab GTPase-activating protein 1 OS=Mus musculus GN=Rabgap1 PE=1 SV=1;sp|A2AWA9-2|RBGP1_MOUSE Isoform 2 of Rab GTPase-activating protein 1 OS=M	1471700000	1151400000	1474300000	62082000	22299000	17446000	22338000	2058400000	2104300000	2308900000	23	23	21	27.4	27.4	25.9	120.8	0	68.616	4097400000	65	16	15	19	16	15	19	14	14	18	20	20	25
290	A2AWF8;A2AWF9;E9Q4S7;Q64455;Q61373;Q3V2L7	A2AWF8;A2AWF9;E9Q4S7;Q64455	Protein-tyrosine-phosphatase;Receptor-type tyrosine-protein phosphatase eta	Ptprj	tr|A2AWF8|A2AWF8_MOUSE Receptor-type tyrosine-protein phosphatase eta OS=Mus musculus GN=Ptprj PE=4 SV=1;tr|A2AWF9|A2AWF9_MOUSE Receptor-type tyrosine-protein phosphatase eta OS=Mus musculus GN=Ptprj PE=4 SV=1;tr|E9Q4S7|E9Q4S7_MOUSE Receptor-type tyrosine-	129860000	86646000	151980000	6580100	2319000	1547300	2713900	253350000	272530000	204810000	8	8	8	9.9	9.9	9.9	128.71	0	17.011	368490000	17	6	5	6	6	5	6	6	5	6	6	4	7
291	A2AWI7;Q8R3V5-1;Q8R3V5;A2AWI9;B0LDS3;Q8R3V5-3	A2AWI7;Q8R3V5-1;Q8R3V5;A2AWI9;B0LDS3;Q8R3V5-3	Endophilin-B2	Sh3glb2	tr|A2AWI7|A2AWI7_MOUSE Endophilin-B2 OS=Mus musculus GN=Sh3glb2 PE=4 SV=1;sp|Q8R3V5-1|SHLB2_MOUSE Isoform 1 of Endophilin-B2 OS=Mus musculus GN=Sh3glb2;sp|Q8R3V5|SHLB2_MOUSE Endophilin-B2 OS=Mus musculus GN=Sh3glb2 PE=2 SV=2;tr|A2AWI9|A2AWI9_MOUSE Endophil	130090000	78178000	290520000	21687000	5656000	3399000	12631000	264580000	217430000	235970000	8	8	8	23	23	23	44.907	0	78.414	498790000	16	7	3	4	7	3	4	7	3	4	6	3	7
292	A2AWN8;P59326;Q3TH60;Q3U8D6	A2AWN8;P59326;Q3TH60	YTH domain-containing family protein 1	Ythdf1	tr|A2AWN8|A2AWN8_MOUSE YTH domain family 1, isoform CRA_a OS=Mus musculus GN=Ythdf1 PE=4 SV=1;sp|P59326|YTHD1_MOUSE YTH domain-containing family protein 1 OS=Mus musculus GN=Ythdf1 PE=2 SV=1;tr|Q3TH60|Q3TH60_MOUSE Putative uncharacterized protein (Fragment	612570000	511820000	474060000	69498000	26633000	22253000	20611000	1006600000	964910000	1016900000	12	7	7	28.3	18.6	18.6	63.899	0	36.59	1598500000	20	11	8	9	6	4	5	6	4	5	7	6	7
293	A2AWP6;A2AWP8-3;A2AWP8-2;A2AWP8-4;A2AWP8;F6S3V7;A2AWP8-5;A4FUT6;F6ZH54;A2AWP4	A2AWP6;A2AWP8-3;A2AWP8-2;A2AWP8-4;A2AWP8;F6S3V7;A2AWP8-5;A4FUT6	Rho guanine nucleotide exchange factor 10-like protein	Arhgef10l	tr|A2AWP6|A2AWP6_MOUSE Rho guanine nucleotide exchange factor 10-like protein OS=Mus musculus GN=Arhgef10l PE=4 SV=1;sp|A2AWP8-3|ARGAL_MOUSE Isoform 3 of Rho guanine nucleotide exchange factor 10-like protein OS=Mus musculus GN=Arhgef10l;sp|A2AWP8-2|ARGAL_	96496000	31356000	35105000	3133800	1855700	603010	675100	78372000	99208000	119560000	5	4	4	7.2	6.4	6.4	113.98	0	6.0771	162960000	7	4	3	2	3	2	2	3	2	2	4	1	2
294	A2AWS5;B7ZDF7;Q6P9T4;Q3UJF1;Q3U2E0;B7ZDF5;Q9Z2V6;B7ZDF4;Q80TW3;B7ZDF6;Q99N13-2;Q99N13-3;Q99N13	A2AWS5;B7ZDF7;Q6P9T4;Q3UJF1;Q3U2E0;B7ZDF5;Q9Z2V6;B7ZDF4	Histone deacetylase;Histone deacetylase 5	Hdac5	tr|A2AWS5|A2AWS5_MOUSE Histone deacetylase 5 OS=Mus musculus GN=Hdac5 PE=4 SV=1;tr|B7ZDF7|B7ZDF7_MOUSE Histone deacetylase 5 OS=Mus musculus GN=Hdac5 PE=4 SV=1;tr|Q6P9T4|Q6P9T4_MOUSE Histone deacetylase 5 OS=Mus musculus GN=Hdac5 PE=2 SV=1;tr|Q3UJF1|Q3UJF1	64474000	34891000	29653000	2529700	1264200	684130	581430	90383000	73386000	76924000	5	5	5	7.8	7.8	7.8	111.46	0	8.5428	129020000	6	3	2	2	3	2	2	3	2	2	3	1	2
295	A2AWT6;Q9DBH1;A2AWT7;A2AWT5;P25976-2;P25976;Q05DS1;E9Q4A8;G3UZW9	A2AWT6;Q9DBH1;A2AWT7;A2AWT5;P25976-2;P25976	Nucleolar transcription factor 1	Ubtf	tr|A2AWT6|A2AWT6_MOUSE Nucleolar transcription factor 1 OS=Mus musculus GN=Ubtf PE=4 SV=1;tr|Q9DBH1|Q9DBH1_MOUSE Putative uncharacterized protein OS=Mus musculus GN=Ubtf PE=2 SV=1;tr|A2AWT7|A2AWT7_MOUSE Nucleolar transcription factor 1 OS=Mus musculus GN=U	1997400000	1353900000	1991300000	118720000	44388000	30087000	44250000	2214400000	2213000000	2588000000	15	15	15	22.8	22.8	22.8	85.009	0	89.431	5342600000	62	13	12	11	13	12	11	13	12	11	25	19	18
296	A2BDN9;Q8C5K5;Q8C5K5-2	A2BDN9;Q8C5K5;Q8C5K5-2	Uncharacterized protein CXorf38 homolog	1810030O07Rik	tr|A2BDN9|A2BDN9_MOUSE Uncharacterized protein OS=Mus musculus GN=1810030O07Rik PE=2 SV=1;sp|Q8C5K5|CX038_MOUSE Uncharacterized protein CXorf38 homolog OS=Mus musculus PE=2 SV=1;sp|Q8C5K5-2|CX038_MOUSE Isoform 2 of Uncharacterized protein CXorf38 homolog O	99140000	120750000	176410000	18014000	4506400	5488600	8018900	232250000	260880000	271100000	5	5	5	20	20	20	36.588	0	7.5377	396300000	11	4	3	3	4	3	3	4	3	3	4	3	4
297	Q6ZQ47;A2BDX0;Q3UYC8;Q5BL11;Q5RKY4;Q9Z103;Q8BNY2	Q6ZQ47;A2BDX0;Q3UYC8;Q5BL11;Q5RKY4;Q9Z103	Activity-dependent neuroprotector homeobox protein	Adnp	tr|Q6ZQ47|Q6ZQ47_MOUSE MKIAA0784 protein (Fragment) OS=Mus musculus GN=Adnp PE=2 SV=1;tr|A2BDX0|A2BDX0_MOUSE Activity-dependent neuroprotector homeobox protein OS=Mus musculus GN=Adnp PE=1 SV=1;tr|Q3UYC8|Q3UYC8_MOUSE Putative uncharacterized protein OS=Mus	2946100000	2194600000	2581900000	107260000	40918000	30481000	35859000	4650900000	4311100000	5273600000	32	32	32	37.4	37.4	37.4	122.15	0	91.043	7722700000	108	24	22	23	24	22	23	24	22	23	38	33	37
298	A2BDX3;Q14BE0	A2BDX3	Adenylyltransferase and sulfurtransferase MOCS3;Molybdopterin-synthase adenylyltransferase;Molybdopterin-synthase sulfurtransferase	Mocs3	sp|A2BDX3|MOCS3_MOUSE Adenylyltransferase and sulfurtransferase MOCS3 OS=Mus musculus GN=Mocs3 PE=2 SV=1	1130100000	669120000	556370000	81227000	38969000	23073000	19185000	1422500000	1257600000	1375300000	7	7	7	20.7	20.7	20.7	49.374	0	16.717	2355600000	25	6	4	5	6	4	5	6	4	5	10	7	8
299	A2BDY3;Q61060;O70220;Q60688;Q61345;O35392	A2BDY3;Q61060	Forkhead box protein D3	Foxd3	tr|A2BDY3|A2BDY3_MOUSE Forkhead box protein D3 OS=Mus musculus GN=Foxd3 PE=4 SV=1;sp|Q61060|FOXD3_MOUSE Forkhead box protein D3 OS=Mus musculus GN=Foxd3 PE=2 SV=3	127270000	210070000	159350000	41391000	10606000	17506000	13279000	252130000	279870000	226110000	3	3	3	11.1	11.1	11.1	46.818	0	11.129	496690000	5	2	3	3	2	3	3	2	3	3	1	2	2
300	A2BE28-2;A2BE28	A2BE28-2;A2BE28	Ribosomal biogenesis protein LAS1L	Las1l	sp|A2BE28-2|LAS1L_MOUSE Isoform 2 of Ribosomal biogenesis protein LAS1L OS=Mus musculus GN=Las1l;sp|A2BE28|LAS1L_MOUSE Ribosomal biogenesis protein LAS1L OS=Mus musculus GN=Las1l PE=1 SV=1	1421400000	733760000	886290000	70731000	33055000	17064000	20611000	1489100000	1290400000	1518400000	15	15	15	27.4	27.4	27.4	87.577	0	104.57	3041400000	45	12	10	9	12	10	9	12	10	9	16	13	16
301	A2BE91;Q5U4F6	A2BE91;Q5U4F6	WD repeat-containing protein 34	Wdr34	tr|A2BE91|A2BE91_MOUSE WD repeat domain 34 OS=Mus musculus GN=Wdr34 PE=4 SV=1;sp|Q5U4F6|WDR34_MOUSE WD repeat-containing protein 34 OS=Mus musculus GN=Wdr34 PE=2 SV=2	0	0	30049000	1365900	0	0	1365900	0	0	52946000	1	1	1	2	2	2	58.173	0.0046995	1.7325	30049000	1	0	0	1	0	0	1	0	0	1	0	0	1
302	A2BE93;Q5U445;Q3T9S3;Q9EQU5;A2BE92;Q9EQU5-3;Q9CRT3	A2BE93;Q5U445;Q3T9S3;Q9EQU5;A2BE92;Q9EQU5-3	Protein SET	Set;BC085271	tr|A2BE93|A2BE93_MOUSE Protein SET (Fragment) OS=Mus musculus GN=Set PE=1 SV=1;tr|Q5U445|Q5U445_MOUSE cDNA sequence BC085271 OS=Mus musculus GN=BC085271 PE=2 SV=1;tr|Q3T9S3|Q3T9S3_MOUSE SET translocation OS=Mus musculus GN=Set PE=2 SV=1;sp|Q9EQU5|SET_MOUSE	19574000000	18013000000	16173000000	4479900000	1631100000	1501100000	1347700000	21927000000	23136000000	20455000000	13	13	4	59.5	59.5	22.8	24.923	0	323.31	53759000000	96	13	12	13	13	12	13	4	4	4	33	30	33
303	A2BEF2;Q52KF7;A2BEE9;Q80TH1;P70175	A2BEF2;Q52KF7;A2BEE9;Q80TH1;P70175	Disks large homolog 3	Dlg3	tr|A2BEF2|A2BEF2_MOUSE Disks large homolog 3 OS=Mus musculus GN=Dlg3 PE=1 SV=1;tr|Q52KF7|Q52KF7_MOUSE Disks large homolog 3 OS=Mus musculus GN=Dlg3 PE=1 SV=1;tr|A2BEE9|A2BEE9_MOUSE Disks large homolog 3 OS=Mus musculus GN=Dlg3 PE=1 SV=1;tr|Q80TH1|Q80TH1_MO	1218400000	915770000	774600000	111880000	46862000	35222000	29792000	1597800000	1475100000	983660000	12	9	9	26.8	20.7	20.7	57.905	0	43.989	2908800000	30	9	9	10	7	6	7	7	6	7	12	9	9
304	A2BFF7;Q3TPJ8;O88487;A2BFF8;D6Q0F7;A2BFF9;D6Q0F6;D6Q0F5;A2BFF5;Q3UDA2	A2BFF7;Q3TPJ8;O88487;A2BFF8;D6Q0F7;A2BFF9;D6Q0F6;D6Q0F5;A2BFF5;Q3UDA2	Cytoplasmic dynein 1 intermediate chain 2	Dync1i2	tr|A2BFF7|A2BFF7_MOUSE Dynein cytoplasmic 1 intermediate chain 2 OS=Mus musculus GN=Dync1i2 PE=2 SV=1;tr|Q3TPJ8|Q3TPJ8_MOUSE Cytoplasmic dynein 1 intermediate chain 2 OS=Mus musculus GN=Dync1i2 PE=1 SV=1;sp|O88487|DC1I2_MOUSE Cytoplasmic dynein 1 intermedi	2743100000	2655400000	2711100000	352590000	119260000	115450000	117880000	3732700000	3562200000	3567200000	15	15	15	44.1	44.1	44.1	68.393	0	118.38	8109600000	75	11	15	13	11	15	13	11	15	13	23	25	27
305	Q6GSP7;A2BG76;I7HIP8;A2BG75;A2BG77;P97863-3;P97863-2;P97863;Q8BN68;Q8C434;Q3UFE1;A2ADI3;J3JS90	Q6GSP7;A2BG76;I7HIP8;A2BG75;A2BG77;P97863-3;P97863-2;P97863;Q8BN68;Q8C434;Q3UFE1	Nuclear factor 1;Nuclear factor 1 B-type	Nfib	tr|Q6GSP7|Q6GSP7_MOUSE Nuclear factor 1 OS=Mus musculus GN=Nfib PE=2 SV=1;tr|A2BG76|A2BG76_MOUSE Nuclear factor 1 OS=Mus musculus GN=Nfib PE=1 SV=1;tr|I7HIP8|I7HIP8_MOUSE Nuclear factor 1 OS=Mus musculus GN=Nfib PE=1 SV=1;tr|A2BG75|A2BG75_MOUSE Nuclear fac	655990000	856790000	741090000	118620000	34526000	45094000	39005000	1398500000	1356500000	1072100000	10	10	8	36.7	36.7	31.7	47.471	0	38.369	2253900000	33	7	9	7	7	9	7	6	7	6	10	12	11
306	A2BGN7;Q9D8X0	A2BGN7;Q9D8X0	Protein MANBAL	Manbal	tr|A2BGN7|A2BGN7_MOUSE Protein MANBAL OS=Mus musculus GN=Manbal PE=4 SV=1;sp|Q9D8X0|MANBL_MOUSE Protein MANBAL OS=Mus musculus GN=Manbal PE=2 SV=2	241250000	291070000	248850000	156240000	48251000	58215000	49771000	233170000	302570000	301050000	2	2	2	40	40	40	9.3679	0	6.9725	781180000	13	2	2	2	2	2	2	2	2	2	6	4	3
307	A2BI12;Q05CD2;Q99JF8-2;F6RB63	A2BI12;Q05CD2;Q99JF8-2;F6RB63	PC4 and SFRS1-interacting protein	Psip1	tr|A2BI12|A2BI12_MOUSE PC4 and SFRS1-interacting protein OS=Mus musculus GN=Psip1 PE=1 SV=1;tr|Q05CD2|Q05CD2_MOUSE Psip1 protein (Fragment) OS=Mus musculus GN=Psip1 PE=2 SV=1;sp|Q99JF8-2|PSIP1_MOUSE Isoform 2 of PC4 and SFRS1-interacting protein OS=Mus mus	0	76665000	0	4035000	0	4035000	0	0	80007000	0	14	1	1	46.8	4	4	36.968	1	-2	76665000	1	11	13	12	0	1	0	0	1	0	0	1	0
308	Q3UR75;A2BIE1	Q3UR75;A2BIE1		Qser1	tr|Q3UR75|Q3UR75_MOUSE Putative uncharacterized protein (Fragment) OS=Mus musculus GN=Qser1 PE=2 SV=1;tr|A2BIE1|A2BIE1_MOUSE Protein Qser1 OS=Mus musculus GN=Qser1 PE=4 SV=2	39801000	22261000	32511000	1525400	641950	359040	524370	48688000	52096000	75085000	5	5	5	6.8	6.8	6.8	132.88	0	9.0813	94572000	6	3	3	2	3	3	2	3	3	2	2	3	1
309	A2CEK1;Q2M1K0;F6XAI7;Q8VDY4	A2CEK1;Q2M1K0;F6XAI7;Q8VDY4	EF-hand calcium-binding domain-containing protein 7	Efcab7	tr|A2CEK1|A2CEK1_MOUSE EF-hand calcium-binding domain-containing protein 7 (Fragment) OS=Mus musculus GN=Efcab7 PE=4 SV=1;tr|Q2M1K0|Q2M1K0_MOUSE Efcab7 protein OS=Mus musculus GN=Efcab7 PE=2 SV=1;tr|F6XAI7|F6XAI7_MOUSE EF-hand calcium-binding domain-contai	0	19852000	19216000	5581100	0	2836000	2745100	0	0	61314000	1	1	1	9.2	9.2	9.2	14.809	0.006185	1.5378	39067000	0	0	1	1	0	1	1	0	1	1	0	0	0
310	A2CG35;P35283	A2CG35;P35283	Ras-related protein Rab-12	Rab12	tr|A2CG35|A2CG35_MOUSE Ras-related protein Rab-12 OS=Mus musculus GN=Rab12 PE=1 SV=1;sp|P35283|RAB12_MOUSE Ras-related protein Rab-12 OS=Mus musculus GN=Rab12 PE=1 SV=3	282780000	400050000	172650000	42774000	14139000	20003000	8632400	402760000	384810000	363070000	8	8	8	32.6	32.6	32.6	32.238	0	12.145	855480000	18	5	6	4	5	6	4	5	6	4	5	7	6
311	A2CG63-2;A2CG63;Q8BV50;Z4YL44;Z4YMH1;Q8BYB0;Q8BXV6;Q3TR72;F6R6U0	A2CG63-2;A2CG63;Q8BV50;Z4YL44;Z4YMH1	AT-rich interactive domain-containing protein 4B	Arid4b	sp|A2CG63-2|ARI4B_MOUSE Isoform 2 of AT-rich interactive domain-containing protein 4B OS=Mus musculus GN=Arid4b;sp|A2CG63|ARI4B_MOUSE AT-rich interactive domain-containing protein 4B OS=Mus musculus GN=Arid4b PE=1 SV=1;tr|Q8BV50|Q8BV50_MOUSE Putative uncha	69155000	27782000	19353000	1789100	1063900	427420	297740	87067000	81257000	0	5	5	5	5.7	5.7	5.7	137.32	0	7.3335	116290000	6	3	1	2	3	1	2	3	1	2	3	1	2
312	F6ZBL2;A2RRJ6;Q80SY4;Q3TSS1;F6YFW9	F6ZBL2;A2RRJ6;Q80SY4	E3 ubiquitin-protein ligase MIB1	Mib1	tr|F6ZBL2|F6ZBL2_MOUSE E3 ubiquitin-protein ligase MIB1 (Fragment) OS=Mus musculus GN=Mib1 PE=4 SV=1;tr|A2RRJ6|A2RRJ6_MOUSE Mib1 protein OS=Mus musculus GN=Mib1 PE=2 SV=1;sp|Q80SY4|MIB1_MOUSE E3 ubiquitin-protein ligase MIB1 OS=Mus musculus GN=Mib1 PE=1 SV	301870000	169900000	234670000	18591000	7943900	4471100	6175600	420740000	381600000	351040000	7	7	7	17.9	17.9	17.9	69.637	0	13.131	706440000	18	5	3	5	5	3	5	5	3	5	7	6	5
313	A2RRK3;O54988-2;O54988;Q3TRK8;G3X8V6;B9EHD2;O70458-2;O70458	A2RRK3;O54988-2;O54988	STE20-like serine/threonine-protein kinase	Slk	tr|A2RRK3|A2RRK3_MOUSE Slk protein OS=Mus musculus GN=Slk PE=2 SV=1;sp|O54988-2|SLK_MOUSE Isoform 2 of STE20-like serine/threonine-protein kinase OS=Mus musculus GN=Slk;sp|O54988|SLK_MOUSE STE20-like serine/threonine-protein kinase OS=Mus musculus GN=Slk P	2197800000	2395200000	2425700000	100270000	31397000	34218000	34653000	3034300000	3145500000	3182400000	28	28	27	33.5	33.5	32.8	137.71	0	86.514	7018700000	66	18	23	22	18	23	22	17	22	21	21	22	23
314	A2RRR0;A3KMG9;Z4YJC9;Q6T3U4	A2RRR0;A3KMG9;Z4YJC9;Q6T3U4	Niemann-Pick C1-like protein 1	Npc1l1	tr|A2RRR0|A2RRR0_MOUSE Npc1l1 protein OS=Mus musculus GN=Npc1l1 PE=2 SV=1;tr|A3KMG9|A3KMG9_MOUSE Npc1l1 protein (Fragment) OS=Mus musculus GN=Npc1l1 PE=2 SV=1;tr|Z4YJC9|Z4YJC9_MOUSE NPC1-like 1 OS=Mus musculus GN=Npc1l1 PE=4 SV=1;sp|Q6T3U4|NPCL1_MOUSE Niem	86337000	150730000	76278000	11191000	3083500	5383100	2724200	86337000	157300000	80497000	1	1	1	1.1	1.1	1.1	79.971	0.0072595	1.4513	313340000	3	1	1	1	1	1	1	1	1	1	1	1	1
315	A2RS22;Q9WUM3;D3YUG6	A2RS22;Q9WUM3	Coronin;Coronin-1B	Coro1b	tr|A2RS22|A2RS22_MOUSE Coronin OS=Mus musculus GN=Coro1b PE=2 SV=1;sp|Q9WUM3|COR1B_MOUSE Coronin-1B OS=Mus musculus GN=Coro1b PE=1 SV=1	5377500000	6782400000	7082900000	836640000	233810000	294890000	307950000	10472000000	9908900000	10212000000	14	14	14	37.8	37.8	37.8	53.912	0	128.26	19243000000	103	12	12	13	12	12	13	12	12	13	31	35	37
316	A2RS23;Q11136;G3UXC5	A2RS23;Q11136	Xaa-Pro dipeptidase	Pepd	tr|A2RS23|A2RS23_MOUSE Peptidase D OS=Mus musculus GN=Pepd PE=2 SV=1;sp|Q11136|PEPD_MOUSE Xaa-Pro dipeptidase OS=Mus musculus GN=Pepd PE=2 SV=3	2415300000	2104400000	2181500000	239330000	86262000	75157000	77910000	3997000000	3739300000	4404800000	19	19	19	46.5	46.5	46.5	55.028	0	128.65	6701200000	59	16	13	14	16	13	14	16	13	14	22	18	19
317	Q3USI1;Q3TVS7;O88185;A2RS43;E9Q2S0;Q2TJI4;Q2TJI5;Q2TJI6;Q8CA35	Q3USI1;Q3TVS7;O88185;A2RS43;E9Q2S0		Pcdh7	tr|Q3USI1|Q3USI1_MOUSE Putative uncharacterized protein OS=Mus musculus GN=Pcdh7 PE=2 SV=1;tr|Q3TVS7|Q3TVS7_MOUSE Putative uncharacterized protein OS=Mus musculus GN=Pcdh7 PE=2 SV=1;tr|O88185|O88185_MOUSE BH-protocadherin-a OS=Mus musculus GN=Pcdh7 PE=2 SV	110530000	113190000	96523000	6279300	2167200	2219400	1892600	208630000	164870000	259280000	5	5	5	8.9	8.9	8.9	116.23	0	10.376	320240000	13	3	4	4	3	4	4	3	4	4	3	6	4
318	Q8C1Z9;F6V6T4;A2RS53;Q9R0Q3;Q3U9H7;Q3THL1;Q8BPI2	Q8C1Z9;F6V6T4;A2RS53;Q9R0Q3;Q3U9H7;Q3THL1;Q8BPI2	Transmembrane emp24 domain-containing protein 2	Tmed2	tr|Q8C1Z9|Q8C1Z9_MOUSE Putative uncharacterized protein OS=Mus musculus PE=2 SV=1;tr|F6V6T4|F6V6T4_MOUSE Transmembrane emp24 domain-containing protein 2 (Fragment) OS=Mus musculus GN=Tmed2 PE=3 SV=1;tr|A2RS53|A2RS53_MOUSE Transmembrane emp24 domain traffic	3640800000	2968300000	3752400000	1036100000	364080000	296830000	375240000	4482900000	4232500000	5520000000	7	7	7	47.2	47.2	47.2	18.262	0	41.85	10361000000	75	6	7	6	6	7	6	6	7	6	26	27	22
319	A2RS58;P47941;Q8R5B8	A2RS58;P47941	Crk-like protein	Crkl	tr|A2RS58|A2RS58_MOUSE V-crk sarcoma virus CT10 oncogene homolog (Avian)-like OS=Mus musculus GN=Crkl PE=2 SV=1;sp|P47941|CRKL_MOUSE Crk-like protein OS=Mus musculus GN=Crkl PE=1 SV=2	976070000	862440000	993770000	149070000	51372000	45391000	52304000	1817800000	1850000000	1618300000	8	8	8	41.6	41.6	41.6	33.83	0	48.212	2832300000	29	6	5	7	6	5	7	6	5	7	8	9	12
320	A2RS68;Q62376;Q9CR32;Q6ZWP0;Q62376-2;Q7TT81;Q99LY5	A2RS68;Q62376;Q9CR32;Q6ZWP0;Q62376-2;Q7TT81	U1 small nuclear ribonucleoprotein 70 kDa	Snrnp70	tr|A2RS68|A2RS68_MOUSE Small nuclear ribonucleoprotein 70 (U1) OS=Mus musculus GN=Snrnp70 PE=2 SV=1;sp|Q62376|RU17_MOUSE U1 small nuclear ribonucleoprotein 70 kDa OS=Mus musculus GN=Snrnp70 PE=1 SV=2;tr|Q9CR32|Q9CR32_MOUSE Putative uncharacterized protein	7002900000	5549500000	5380300000	943820000	368570000	292080000	283170000	6901900000	6727900000	7194200000	18	18	18	35.5	35.5	35.5	51.991	0	68.6	17933000000	62	14	14	14	14	14	14	14	14	14	19	21	22
321	Q8VCE7;A2RS96;Q9CXE7;Q3TW73;E9PXY3;Q3U9T7;D3Z615;Q8C5H9;Q3V440;Q8C954;E9Q2J2	Q8VCE7;A2RS96;Q9CXE7;Q3TW73;E9PXY3;Q3U9T7	Transmembrane emp24 domain-containing protein 5	Tmed5	tr|Q8VCE7|Q8VCE7_MOUSE Transmembrane emp24 protein transport domain containing 5 OS=Mus musculus GN=Tmed5 PE=2 SV=1;tr|A2RS96|A2RS96_MOUSE Transmembrane emp24 protein transport domain containing 5 OS=Mus musculus GN=Tmed5 PE=2 SV=1;sp|Q9CXE7|TMED5_MOUSE Tr	170860000	439640000	530050000	87734000	13143000	33818000	40773000	491370000	483890000	551520000	3	3	3	14.8	14.8	14.8	26.186	0	7.9162	1140500000	11	3	3	2	3	3	2	3	3	2	4	3	4
322	A2RSB1;B7ZNL2;Q8C1W9;Q78ZA7	A2RSB1;B7ZNL2;Q8C1W9;Q78ZA7	Nucleosome assembly protein 1-like 4	Nap1l4	tr|A2RSB1|A2RSB1_MOUSE Nucleosome assembly protein 1-like 4 OS=Mus musculus GN=Nap1l4 PE=2 SV=1;tr|B7ZNL2|B7ZNL2_MOUSE Nap1l4 protein OS=Mus musculus GN=Nap1l4 PE=2 SV=1;tr|Q8C1W9|Q8C1W9_MOUSE Putative uncharacterized protein OS=Mus musculus GN=Nap1l4 PE=2	8167800000	6106000000	5962400000	1124200000	453770000	339220000	331240000	10613000000	10180000000	10317000000	16	14	14	65.3	62.7	62.7	42.679	0	105.93	20236000000	86	15	11	13	14	10	11	14	10	11	30	28	28
323	A2RSE4;P63147	A2RSE4;P63147	Ubiquitin-conjugating enzyme E2 B	Ube2b	tr|A2RSE4|A2RSE4_MOUSE Ubiquitin-conjugating enzyme E2B, RAD6 homology (S. cerevisiae) OS=Mus musculus GN=Ube2b PE=2 SV=1;sp|P63147|UBE2B_MOUSE Ubiquitin-conjugating enzyme E2 B OS=Mus musculus GN=Ube2b PE=1 SV=1	0	11217000	0	2804300	0	2804300	0	0	22283000	0	1	1	1	11.2	11.2	11.2	17.312	0.0045669	1.7612	11217000	1	0	1	0	0	1	0	0	1	0	0	1	0
324	Q3UGT3;A2RSF1;Q8K4M5;F7BCN0;F7BZY0;Q8VI86;G8JL54	Q3UGT3;A2RSF1;Q8K4M5;F7BCN0;F7BZY0;Q8VI86	COMM domain-containing protein 1	Commd1;Gm28048	tr|Q3UGT3|Q3UGT3_MOUSE Putative uncharacterized protein OS=Mus musculus GN=Commd1 PE=2 SV=1;tr|A2RSF1|A2RSF1_MOUSE COMM domain containing 1 OS=Mus musculus GN=Commd1 PE=2 SV=1;sp|Q8K4M5|COMD1_MOUSE COMM domain-containing protein 1 OS=Mus musculus GN=Commd1	122250000	122780000	98871000	57318000	20375000	20464000	16478000	141910000	226770000	168240000	3	3	3	34.8	34.8	34.8	15.35	0	11.06	343910000	12	3	3	3	3	3	3	3	3	3	5	4	3
325	A2RSJ4;Q922V6;Q8C318;Q9D574	A2RSJ4	UHRF1-binding protein 1-like	Uhrf1bp1l	sp|A2RSJ4|UH1BL_MOUSE UHRF1-binding protein 1-like OS=Mus musculus GN=Uhrf1bp1l PE=1 SV=2	180440000	177570000	349520000	7608000	1940300	1909400	3758300	401290000	432410000	370490000	10	10	9	10.8	10.8	10.3	161.94	0	16.898	707540000	21	6	7	8	6	7	8	5	6	7	5	8	8
326	A2RSL2;Q8BMD7-2;Q8BMD7;F6WD71	A2RSL2;Q8BMD7-2;Q8BMD7;F6WD71	MORC family CW-type zinc finger protein 4	Morc4	tr|A2RSL2|A2RSL2_MOUSE Microrchidia 4 OS=Mus musculus GN=Morc4 PE=2 SV=1;sp|Q8BMD7-2|MORC4_MOUSE Isoform 2 of MORC family CW-type zinc finger protein 4 OS=Mus musculus GN=Morc4;sp|Q8BMD7|MORC4_MOUSE MORC family CW-type zinc finger protein 4 OS=Mus musculus	0	129610000	0	2160200	0	2160200	0	0	176730000	0	2	2	2	2.6	2.6	2.6	100.6	1	-2	129610000	1	0	2	1	0	2	1	0	2	1	0	1	0
327	A2RSQ0	A2RSQ0	DENN domain-containing protein 5B	Dennd5b	sp|A2RSQ0|DEN5B_MOUSE DENN domain-containing protein 5B OS=Mus musculus GN=Dennd5b PE=1 SV=2	14059000	14551000	9636300	570850	209840	217180	143830	26824000	27662000	22236000	4	3	3	5.7	5.1	5.1	144.63	0.0014706	2.1633	38247000	4	3	2	1	2	2	1	2	2	1	1	2	1
328	A2RSS6;Q64191;B7ZNK6	A2RSS6;Q64191;B7ZNK6	N(4)-(beta-N-acetylglucosaminyl)-L-asparaginase;Glycosylasparaginase alpha chain;Glycosylasparaginase beta chain	Aga	tr|A2RSS6|A2RSS6_MOUSE Aspartylglucosaminidase OS=Mus musculus GN=Aga PE=2 SV=1;sp|Q64191|ASPG_MOUSE N(4)-(beta-N-acetylglucosaminyl)-L-asparaginase OS=Mus musculus GN=Aga PE=2 SV=1;tr|B7ZNK6|B7ZNK6_MOUSE Aga protein OS=Mus musculus GN=Aga PE=2 SV=1	529990000	420980000	436130000	77061000	29444000	23388000	24230000	832940000	741340000	659310000	6	6	6	27.5	27.5	27.5	37.022	0	41.645	1387100000	18	5	5	5	5	5	5	5	5	5	6	4	8
329	A2RSV8;P19783;M0QWX7;D6RG40	A2RSV8;P19783;M0QWX7	Cytochrome c oxidase subunit 4 isoform 1, mitochondrial	Cox4i1	tr|A2RSV8|A2RSV8_MOUSE Cytochrome c oxidase subunit IV isoform 1 OS=Mus musculus GN=Cox4i1 PE=2 SV=1;sp|P19783|COX41_MOUSE Cytochrome c oxidase subunit 4 isoform 1, mitochondrial OS=Mus musculus GN=Cox4i1 PE=1 SV=2;tr|M0QWX7|M0QWX7_MOUSE Cytochrome c oxida	5665300000	4729300000	3984600000	1198300000	472110000	394110000	332050000	8477400000	8136400000	7223600000	8	8	8	48.5	48.5	48.5	19.53	0	44.651	14379000000	57	8	7	7	8	7	7	8	7	7	16	19	22
330	A2RSW6;Q8CFA2	A2RSW6;Q8CFA2	Aminomethyltransferase;Aminomethyltransferase, mitochondrial	Amt	tr|A2RSW6|A2RSW6_MOUSE Aminomethyltransferase OS=Mus musculus GN=Amt PE=2 SV=1;sp|Q8CFA2|GCST_MOUSE Aminomethyltransferase, mitochondrial OS=Mus musculus GN=Amt PE=1 SV=1	2268100000	2108500000	1983300000	289090000	103100000	95843000	90151000	4293800000	4558400000	4248000000	14	14	14	40.9	40.9	40.9	44.008	0	120.96	6360000000	71	12	13	11	12	13	11	12	13	11	23	25	23
331	Q8CDQ3;A2RSX4	Q8CDQ3;A2RSX4		4933433C11Rik	tr|Q8CDQ3|Q8CDQ3_MOUSE Protein 4933433C11Rik OS=Mus musculus GN=4933433C11Rik PE=2 SV=1;tr|A2RSX4|A2RSX4_MOUSE 4933433C11Rik protein OS=Mus musculus GN=4933433C11Rik PE=2 SV=1	8805900000	8648300000	6474500000	1840700000	677370000	665250000	498040000	15177000000	12490000000	13852000000	1	1	1	3.6	3.6	3.6	28.338	1	-2	23929000000	10	1	1	1	1	1	1	1	1	1	3	4	3
332	A2RSX9;E9QAY5;Q3TVE1	A2RSX9;E9QAY5;Q3TVE1		Arfip1	tr|A2RSX9|A2RSX9_MOUSE Arfip1 protein OS=Mus musculus GN=Arfip1 PE=2 SV=1;tr|E9QAY5|E9QAY5_MOUSE Protein Arfip1 OS=Mus musculus GN=Arfip1 PE=4 SV=1;tr|Q3TVE1|Q3TVE1_MOUSE Putative uncharacterized protein (Fragment) OS=Mus musculus GN=Arfip1 PE=2 SV=1	393340000	472780000	439300000	52217000	15734000	18911000	17572000	393340000	493390000	463600000	16	1	1	56.3	4.1	4.1	38.416	0	7.3793	1305400000	2	10	10	12	1	1	1	1	1	1	0	1	1
333	A2RSY1-3;A2RSY1-2;A2RSY1	A2RSY1-3;A2RSY1-2;A2RSY1	KAT8 regulatory NSL complex subunit 3	Kansl3	sp|A2RSY1-3|KANL3_MOUSE Isoform 3 of KAT8 regulatory NSL complex subunit 3 OS=Mus musculus GN=Kansl3;sp|A2RSY1-2|KANL3_MOUSE Isoform 2 of KAT8 regulatory NSL complex subunit 3 OS=Mus musculus GN=Kansl3;sp|A2RSY1|KANL3_MOUSE KAT8 regulatory NSL complex subu	44637000	39864000	62417000	3583400	1088700	972290	1522400	79555000	101220000	123540000	5	5	5	13.8	13.8	13.8	82.031	0	10.199	146920000	10	3	2	4	3	2	4	3	2	4	3	3	4
334	A2RSY6;A2RSY6-2;A2RSY6-3	A2RSY6;A2RSY6-2	TRMT1-like protein	Trmt1l	sp|A2RSY6|TRM1L_MOUSE TRMT1-like protein OS=Mus musculus GN=Trmt1l PE=2 SV=1;sp|A2RSY6-2|TRM1L_MOUSE Isoform 2 of TRMT1-like protein OS=Mus musculus GN=Trmt1l	1145400000	807350000	901620000	60732000	24371000	17178000	19184000	1801300000	1593700000	1969700000	13	13	13	27.9	27.9	27.9	80.86	0	98.17	2854400000	43	10	9	10	10	9	10	10	9	10	16	12	15
335	A2RT05;P27545	A2RT05;P27545	Ceramide synthase 1	Lass1;Cers1	tr|A2RT05|A2RT05_MOUSE LAG1 homolog, ceramide synthase 1 OS=Mus musculus GN=Lass1 PE=2 SV=1;sp|P27545|CERS1_MOUSE Ceramide synthase 1 OS=Mus musculus GN=Cers1 PE=1 SV=1	19273000	0	14845000	2274600	1284900	0	989690	35999000	0	33525000	1	1	1	4.6	4.6	4.6	40.1	0.00075143	2.4626	34119000	3	1	0	1	1	0	1	1	0	1	2	0	1
336	A2RT28;Q499X9	A2RT28;Q499X9	Methionine--tRNA ligase, mitochondrial	Mars2	tr|A2RT28|A2RT28_MOUSE Methionine-tRNA synthetase 2 (Mitochondrial) OS=Mus musculus GN=Mars2 PE=2 SV=1;sp|Q499X9|SYMM_MOUSE Methionine--tRNA ligase, mitochondrial OS=Mus musculus GN=Mars2 PE=2 SV=2	302840000	216090000	342130000	29692000	10443000	7451300	11798000	473780000	517050000	536890000	11	11	11	28	28	28	65.804	0	28.329	861060000	31	7	8	8	7	8	8	7	8	8	13	9	9
337	A2RT57;Q9CQC8;Q9CQC8-2	A2RT57;Q9CQC8;Q9CQC8-2	Maspardin	Spg21	tr|A2RT57|A2RT57_MOUSE Spastic paraplegia 21 homolog (Human) OS=Mus musculus GN=Spg21 PE=2 SV=1;sp|Q9CQC8|SPG21_MOUSE Maspardin OS=Mus musculus GN=Spg21 PE=1 SV=1;sp|Q9CQC8-2|SPG21_MOUSE Isoform 2 of Maspardin OS=Mus musculus GN=Spg21	513660000	498860000	611160000	90204000	28536000	27715000	33953000	748830000	606590000	866130000	8	8	8	39.3	39.3	39.3	34.952	0	37.163	1623700000	24	8	6	5	8	6	5	8	6	5	10	8	6
338	Q9D6U7;A2RTA0;P07310;A2ARP5	Q9D6U7;A2RTA0;P07310	Creatine kinase M-type	Ckm	tr|Q9D6U7|Q9D6U7_MOUSE Putative uncharacterized protein OS=Mus musculus GN=Ckm PE=2 SV=1;tr|A2RTA0|A2RTA0_MOUSE Creatine kinase, muscle OS=Mus musculus GN=Ckm PE=2 SV=1;sp|P07310|KCRM_MOUSE Creatine kinase M-type OS=Mus musculus GN=Ckm PE=1 SV=1	74561000	59487000	0	5361900	2982400	2379500	0	87213000	78878000	0	4	1	1	12.1	8.4	8.4	43.03	0	3.6549	134050000	2	4	4	1	1	1	0	1	1	0	1	1	0
339	A2RTC2;Q8VIG0-2;Q8VIG0;Q8VIG0-3	A2RTC2;Q8VIG0-2;Q8VIG0;Q8VIG0-3	Zinc finger CCHC domain-containing protein 14	Zcchc14	tr|A2RTC2|A2RTC2_MOUSE Zinc finger, CCHC domain containing 14 OS=Mus musculus GN=Zcchc14 PE=2 SV=1;sp|Q8VIG0-2|ZCH14_MOUSE Isoform 2 of Zinc finger CCHC domain-containing protein 14 OS=Mus musculus GN=Zcchc14;sp|Q8VIG0|ZCH14_MOUSE Zinc finger CCHC domain-c	0	7806400	14498000	637280	0	223040	414240	0	18992000	32816000	2	2	2	2.6	2.6	2.6	99.834	0.0014715	2.1796	22305000	5	0	2	1	0	2	1	0	2	1	0	2	3
340	A2RTC8;Q3KNM2;F6W8T3	A2RTC8;Q3KNM2	E3 ubiquitin-protein ligase MARCH5	2005-03-01	tr|A2RTC8|A2RTC8_MOUSE MCG13921, isoform CRA_b OS=Mus musculus GN=March5 PE=2 SV=1;sp|Q3KNM2|MARH5_MOUSE E3 ubiquitin-protein ligase MARCH5 OS=Mus musculus GN=March5 PE=2 SV=1	483150000	887100000	858120000	131080000	28421000	52182000	50478000	1018600000	1669000000	1284800000	7	7	7	33.5	33.5	33.5	31.231	0	26.105	2228400000	15	4	4	5	4	4	5	4	4	5	5	5	5
341	A2RTH5;Q78K29;Q9D963;Q6PDZ4	A2RTH5		Lcmt1	tr|A2RTH5|A2RTH5_MOUSE Leucine carboxyl methyltransferase 1 OS=Mus musculus GN=Lcmt1 PE=2 SV=1	409130000	243270000	282070000	44498000	19482000	11584000	13432000	575480000	410540000	510570000	9	9	9	38.3	38.3	38.3	38.192	0	16.126	934470000	19	5	6	6	5	6	6	5	6	6	6	6	7
342	A2RTI3;O89017;Q3UE99	A2RTI3;O89017	Legumain	Lgmn	tr|A2RTI3|A2RTI3_MOUSE Legumain OS=Mus musculus GN=Lgmn PE=2 SV=1;sp|O89017|LGMN_MOUSE Legumain OS=Mus musculus GN=Lgmn PE=1 SV=1	939670000	855830000	966560000	125550000	42712000	38901000	43935000	1187100000	1341000000	1347300000	7	7	7	24.6	24.6	24.6	49.372	0	63.643	2762100000	20	7	5	6	7	5	6	7	5	6	8	4	8
343	A2RTT4;P61089	A2RTT4;P61089	Ubiquitin-conjugating enzyme E2 N	Ube2n	tr|A2RTT4|A2RTT4_MOUSE MCG4297 OS=Mus musculus GN=Ube2n PE=2 SV=1;sp|P61089|UBE2N_MOUSE Ubiquitin-conjugating enzyme E2 N OS=Mus musculus GN=Ube2n PE=1 SV=1	10858000000	9476400000	7342000000	2516100000	987130000	861490000	667460000	20217000000	15883000000	13399000000	10	10	9	76.3	76.3	76.3	17.138	0	37.559	27677000000	79	9	8	7	9	8	7	8	7	6	27	25	27
344	A2VCT7;A8E636;Q6ZQ11;A8E635	A2VCT7;A8E636;Q6ZQ11;A8E635	Chondroitin sulfate synthase 1	Chsy1	tr|A2VCT7|A2VCT7_MOUSE Chsy1 protein (Fragment) OS=Mus musculus GN=Chsy1 PE=2 SV=1;tr|A8E636|A8E636_MOUSE Chsy1 protein (Fragment) OS=Mus musculus GN=Chsy1 PE=2 SV=1;sp|Q6ZQ11|CHSS1_MOUSE Chondroitin sulfate synthase 1 OS=Mus musculus GN=Chsy1 PE=2 SV=2;tr	10081000	12017000	62295000	1623000	193870	231090	1198000	0	69693000	114070000	6	6	6	9.2	9.2	9.2	85.757	0	7.1348	84394000	5	1	1	5	1	1	5	1	1	5	1	0	4
345	A2VDG1;Q8CJG1;Q8BJP2;Q8CGU0;H3BJ70;Q8BTF2;H3BL59;A3KFX7;A3KFX6	A2VDG1;Q8CJG1;Q8BJP2;Q8CGU0;H3BJ70	Protein argonaute;Protein argonaute-1	Ago1	tr|A2VDG1|A2VDG1_MOUSE Protein argonaute (Fragment) OS=Mus musculus GN=Ago1 PE=2 SV=1;sp|Q8CJG1|AGO1_MOUSE Protein argonaute-1 OS=Mus musculus GN=Ago1 PE=1 SV=2;tr|Q8BJP2|Q8BJP2_MOUSE Protein argonaute OS=Mus musculus GN=Ago1 PE=2 SV=1;tr|Q8CGU0|Q8CGU0_MOU	318440000	530000000	216050000	19009000	5686400	9464300	3858000	664290000	775800000	637210000	20	14	9	34.6	25.8	17.8	96.953	0	44.405	1064500000	31	16	16	12	10	10	6	6	5	3	12	12	7
346	A2VDH4;Q3UJQ1;Q8CHK4-2;Q8CHK4;Q8CHK4-3;Q3YFI9;Q8CHK4-4	A2VDH4;Q3UJQ1;Q8CHK4-2;Q8CHK4;Q8CHK4-3;Q3YFI9;Q8CHK4-4	Histone acetyltransferase;Histone acetyltransferase KAT5	Kat5	tr|A2VDH4|A2VDH4_MOUSE Kat5 protein (Fragment) OS=Mus musculus GN=Kat5 PE=2 SV=1;tr|Q3UJQ1|Q3UJQ1_MOUSE HIV-1 tat interactive protein, homolog (Human), isoform CRA_a OS=Mus musculus GN=Kat5 PE=2 SV=1;sp|Q8CHK4-2|KAT5_MOUSE Isoform 2 of Histone acetyltransf	15495000	0	0	534320	534320	0	0	15495000	0	0	2	2	2	9.8	9.8	9.8	52.961	0	7.4401	15495000	0	2	0	1	2	0	1	2	0	1	0	0	0
347	A3KFM7-2;A3KFM7;Q80YD0	A3KFM7-2;A3KFM7	Chromodomain-helicase-DNA-binding protein 6	Chd6	sp|A3KFM7-2|CHD6_MOUSE Isoform 2 of Chromodomain-helicase-DNA-binding protein 6 OS=Mus musculus GN=Chd6;sp|A3KFM7|CHD6_MOUSE Chromodomain-helicase-DNA-binding protein 6 OS=Mus musculus GN=Chd6 PE=1 SV=1	12402000	20161000	0	224570	85529	139040	0	23661000	47589000	0	6	1	1	2.2	0.4	0.4	305.31	0.0047055	1.7419	32563000	2	3	4	4	1	1	0	1	1	0	1	1	0
348	A3KG01;A3KG02;A3KG00;Q6P5F1;P54763;P54763-2;F6Q4H2	A3KG01;A3KG02;A3KG00;Q6P5F1;P54763;P54763-2	Receptor protein-tyrosine kinase;Ephrin type-B receptor 2	Ephb2	tr|A3KG01|A3KG01_MOUSE Eph receptor B2 OS=Mus musculus GN=Ephb2 PE=2 SV=2;tr|A3KG02|A3KG02_MOUSE Ephrin type-B receptor 2 OS=Mus musculus GN=Ephb2 PE=4 SV=1;tr|A3KG00|A3KG00_MOUSE Ephrin type-B receptor 2 OS=Mus musculus GN=Ephb2 PE=4 SV=2;tr|Q6P5F1|Q6P5F1	152480000	96271000	36709000	5286200	2823600	1782800	679800	171270000	186150000	95384000	8	7	6	11.5	10.3	8.7	109.9	0	12.844	285460000	12	6	6	3	5	5	2	4	4	2	4	6	2
349	A3KG93;Q6ZQ88;G8JL40;F6Z4I3;F6ZC60	A3KG93;Q6ZQ88;G8JL40	Lysine-specific histone demethylase 1A	Kdm1a	tr|A3KG93|A3KG93_MOUSE Lysine-specific histone demethylase 1A OS=Mus musculus GN=Kdm1a PE=4 SV=1;sp|Q6ZQ88|KDM1A_MOUSE Lysine-specific histone demethylase 1A OS=Mus musculus GN=Kdm1a PE=1 SV=2;tr|G8JL40|G8JL40_MOUSE Lysine-specific histone demethylase 1A (	2005000000	1936100000	1546700000	121950000	44556000	43025000	34371000	3189000000	2877800000	2515800000	26	26	26	49.1	49.1	49.1	94.658	0	95.814	5487900000	81	19	22	22	19	22	22	19	22	22	26	26	29
350	B9EKQ1;A3KGB4	B9EKQ1;A3KGB4	TBC1 domain family member 8B	Tbc1d8b	tr|B9EKQ1|B9EKQ1_MOUSE Tbc1d8b protein OS=Mus musculus GN=Tbc1d8b PE=2 SV=1;sp|A3KGB4|TBC8B_MOUSE TBC1 domain family member 8B OS=Mus musculus GN=Tbc1d8b PE=2 SV=1	596970000	584390000	402930000	27315000	10293000	10076000	6947000	910710000	785010000	914360000	19	19	19	21.5	21.5	21.5	127.47	0	51.796	1584300000	42	15	12	10	15	12	10	15	12	10	18	14	10
351	A3KGF9	A3KGF9	Uncharacterized protein C15orf52 homolog		sp|A3KGF9|CO052_MOUSE Uncharacterized protein C15orf52 homolog OS=Mus musculus PE=1 SV=1	45156000	33045000	30980000	3899300	1612700	1180200	1106400	53845000	48939000	48675000	3	3	3	6.2	6.2	6.2	58.688	0.00030432	2.6204	109180000	7	2	2	2	2	2	2	2	2	2	3	2	2
352	A3KGG8;Q9D9Z1;H3BKK2;F7BE71;A3KGG6;Q9CYZ4	A3KGG8;Q9D9Z1;H3BKK2;F7BE71;A3KGG6	Small kinetochore-associated protein	Knstrn	tr|A3KGG8|A3KGG8_MOUSE Small kinetochore-associated protein OS=Mus musculus GN=Knstrn PE=4 SV=1;sp|Q9D9Z1|SKAP_MOUSE Small kinetochore-associated protein OS=Mus musculus GN=Knstrn PE=2 SV=2;tr|H3BKK2|H3BKK2_MOUSE Small kinetochore-associated protein (Fragm	602830000	103370000	195470000	56354000	37677000	6460400	12217000	690700000	286350000	276810000	5	5	5	34.6	34.6	34.6	26.495	0	10.405	901670000	8	4	1	2	4	1	2	4	1	2	5	1	2
353	A3KGI3;Q66JQ7;A3KGI5;Q9CYF0	A3KGI3;Q66JQ7	Protein CASC5	Casc5	tr|A3KGI3|A3KGI3_MOUSE Protein CASC5 OS=Mus musculus GN=Casc5 PE=4 SV=1;sp|Q66JQ7|CASC5_MOUSE Protein CASC5 OS=Mus musculus GN=Casc5 PE=2 SV=3	172960000	58238000	143060000	2878900	1330400	447980	1100500	265810000	193100000	312000000	12	12	12	8.2	8.2	8.2	238.18	0	23.129	374260000	23	9	4	7	9	4	7	9	4	7	12	4	7
354	A3KGK9;A3KGL3;A3KGL0;Q99KU1;Q99KU1-2	A3KGK9;A3KGL3;A3KGL0;Q99KU1;Q99KU1-2	Dehydrodolichyl diphosphate syntase complex subunit Dhdds	Dhdds	tr|A3KGK9|A3KGK9_MOUSE Dehydrodolichyl diphosphate synthase (Fragment) OS=Mus musculus GN=Dhdds PE=3 SV=1;tr|A3KGL3|A3KGL3_MOUSE Dehydrodolichyl diphosphate synthase (Fragment) OS=Mus musculus GN=Dhdds PE=3 SV=1;tr|A3KGL0|A3KGL0_MOUSE Dehydrodolichyl dipho	10331000	18828000	13086000	3249600	794730	1448300	1006600	23528000	32145000	36031000	1	1	1	8.9	8.9	8.9	19.454	0.00015399	2.813	42245000	3	1	1	1	1	1	1	1	1	1	1	1	1
355	Q5BL14;Q58E57;A3KGL9;F6W687;P09602;E9Q2Z4;B7ZCQ3;J3QM43	Q5BL14;Q58E57;A3KGL9;F6W687;P09602;E9Q2Z4;B7ZCQ3	Non-histone chromosomal protein HMG-17	Hmgn2;Gm16494	tr|Q5BL14|Q5BL14_MOUSE High mobility group nucleosomal binding domain 2 OS=Mus musculus GN=Hmgn2 PE=2 SV=1;tr|Q58E57|Q58E57_MOUSE High mobility group nucleosomal binding domain 2 OS=Mus musculus GN=Hmgn2 PE=2 SV=1;tr|A3KGL9|A3KGL9_MOUSE Non-histone chromos	241500000	259370000	0	125220000	60374000	64842000	0	352650000	447350000	0	6	6	1	40	40	14.4	9.4226	0	72.693	500870000	8	5	6	4	5	6	4	1	1	0	3	5	0
356	A3KGQ6;Q9D898	A3KGQ6;Q9D898	Actin-related protein 2/3 complex subunit 5;Actin-related protein 2/3 complex subunit 5-like protein	Arpc5l	tr|A3KGQ6|A3KGQ6_MOUSE Actin-related protein 2/3 complex subunit 5 OS=Mus musculus GN=Arpc5l PE=3 SV=1;sp|Q9D898|ARP5L_MOUSE Actin-related protein 2/3 complex subunit 5-like protein OS=Mus musculus GN=Arpc5l PE=1 SV=1	697090000	1081600000	1140600000	243270000	58090000	90133000	95049000	1318000000	1543500000	1732000000	7	7	7	62.7	62.7	62.7	17.109	0	98.92	2919300000	31	7	5	6	7	5	6	7	5	6	11	9	11
357	A3KGR9;Q9D8V0-4;Q6PGJ8;Q861Q5;Q8HWB1;Q9D8V0-2	A3KGR9;Q9D8V0-4	Minor histocompatibility antigen H13	H13;Hm13	tr|A3KGR9|A3KGR9_MOUSE Minor histocompatibility antigen H13 (Fragment) OS=Mus musculus GN=H13 PE=4 SV=1;sp|Q9D8V0-4|HM13_MOUSE Isoform 4 of Minor histocompatibility antigen H13 OS=Mus musculus GN=Hm13	0	42692000	35386000	4592800	0	2511300	2081500	0	115330000	126340000	7	1	1	23.9	6.1	6.1	38.174	0	8.6557	78077000	2	5	5	7	0	1	1	0	1	1	0	1	1
358	A3KGU5;B7ZWK3;E9Q447;Q3V1V5;Q3URW8;Q3TYI8;Q58ES7;Q6PA04;A3KGU9;Q3TNY2;A3KGU4;P08032	A3KGU5;B7ZWK3;E9Q447		Sptan1	tr|A3KGU5|A3KGU5_MOUSE Spectrin alpha chain, non-erythrocytic 1 OS=Mus musculus GN=Sptan1 PE=1 SV=1;tr|B7ZWK3|B7ZWK3_MOUSE Spna2 protein OS=Mus musculus GN=Sptan1 PE=2 SV=1;tr|E9Q447|E9Q447_MOUSE Spectrin alpha chain, non-erythrocytic 1 OS=Mus musculus GN=	38915000000	35339000000	35250000000	582470000	207000000	187970000	187500000	48795000000	49545000000	49390000000	146	146	0	68.9	68.9	0	282.89	0	323.31	109500000000	620	124	116	123	124	116	123	0	0	0	216	199	205
359	B9EKJ1;A3KGU7;B2RXX6	B9EKJ1;A3KGU7;B2RXX6		Sptan1	tr|B9EKJ1|B9EKJ1_MOUSE Spna2 protein OS=Mus musculus GN=Sptan1 PE=2 SV=1;tr|A3KGU7|A3KGU7_MOUSE Spectrin alpha chain, non-erythrocytic 1 OS=Mus musculus GN=Sptan1 PE=1 SV=1;tr|B2RXX6|B2RXX6_MOUSE Spna2 protein OS=Mus musculus GN=Sptan1 PE=2 SV=1	112740000	72331000	79544000	1392700	593360	380690	418650	123130000	109450000	116350000	146	1	0	68.3	0.6	0	285.18	0	10.093	264610000	4	124	116	123	1	1	1	0	0	0	2	1	1
360	A3KMD2;Q8BIV3	A3KMD2;Q8BIV3	Ran-binding protein 6	Ranbp6	tr|A3KMD2|A3KMD2_MOUSE RAN binding protein 6 OS=Mus musculus GN=Ranbp6 PE=2 SV=1;sp|Q8BIV3|RNBP6_MOUSE Ran-binding protein 6 OS=Mus musculus GN=Ranbp6 PE=2 SV=3	243360000	224550000	116380000	9738100	4055900	3742600	1939600	397210000	348900000	329050000	12	11	11	15.7	14.6	14.6	124.59	0	25.064	584290000	24	9	9	9	8	8	8	8	8	8	7	9	8
361	A3KMF2;Q5DTZ3;G3X8R8;P59759	A3KMF2;Q5DTZ3;G3X8R8;P59759	MKL/myocardin-like protein 2	Mkl2	tr|A3KMF2|A3KMF2_MOUSE Mkl2 protein (Fragment) OS=Mus musculus GN=Mkl2 PE=2 SV=1;tr|Q5DTZ3|Q5DTZ3_MOUSE MKIAA1243 protein (Fragment) OS=Mus musculus GN=Mkl2 PE=1 SV=1;tr|G3X8R8|G3X8R8_MOUSE MCG123888 OS=Mus musculus GN=Mkl2 PE=1 SV=1;sp|P59759|MKL2_MOUSE M	1268000000	1208500000	278900000	68884000	31699000	30212000	6972500	1118000000	1004000000	1047800000	12	12	11	19.6	19.6	18.4	117.42	0	17.257	2755400000	31	6	8	7	6	8	7	5	7	7	10	11	10
362	A3KMJ8;P61759;Q3TIR6	A3KMJ8;P61759;Q3TIR6	Prefoldin subunit 3	Vbp1	tr|A3KMJ8|A3KMJ8_MOUSE Vbp1 protein (Fragment) OS=Mus musculus GN=Vbp1 PE=2 SV=1;sp|P61759|PFD3_MOUSE Prefoldin subunit 3 OS=Mus musculus GN=Vbp1 PE=2 SV=2;tr|Q3TIR6|Q3TIR6_MOUSE Prefoldin subunit 3 OS=Mus musculus GN=Vbp1 PE=2 SV=1	2147900000	1691000000	1842500000	378750000	143190000	112730000	122830000	3234700000	2462500000	3540900000	12	12	12	52.4	52.4	52.4	21.963	0	111.14	5681300000	46	10	9	9	10	9	9	10	9	9	17	14	15
363	A3KML3;F6YY69;F6VW30;P68254-2;P68254	A3KML3;F6YY69;F6VW30;P68254-2;P68254	14-3-3 protein theta	Ywhaq	tr|A3KML3|A3KML3_MOUSE MCG126220 OS=Mus musculus GN=Ywhaq PE=2 SV=1;tr|F6YY69|F6YY69_MOUSE 14-3-3 protein theta (Fragment) OS=Mus musculus GN=Ywhaq PE=4 SV=1;tr|F6VW30|F6VW30_MOUSE 14-3-3 protein theta (Fragment) OS=Mus musculus GN=Ywhaq PE=3 SV=1;sp|P6825	11271000000	18360000000	17141000000	2598400000	626160000	1020000000	952260000	21277000000	21527000000	20446000000	18	13	13	56.7	42.9	42.9	27.778	0	283.06	46772000000	65	17	18	17	12	13	12	12	13	12	20	22	23
364	E9Q9C5;Q8C1D9;A3KML5;Q80YP7;P63082;A4FVC9;D3Z3B2;Q3UK60	E9Q9C5;Q8C1D9;A3KML5;Q80YP7;P63082;A4FVC9;D3Z3B2;Q3UK60	V-type proton ATPase 16 kDa proteolipid subunit	Atp6v0c;Gm15487	tr|E9Q9C5|E9Q9C5_MOUSE V-type proton ATPase 16 kDa proteolipid subunit (Fragment) OS=Mus musculus GN=Atp6v0c PE=3 SV=1;tr|Q8C1D9|Q8C1D9_MOUSE Putative uncharacterized protein OS=Mus musculus GN=Atp6v0c PE=2 SV=1;tr|A3KML5|A3KML5_MOUSE ATPase, H+ transporti	1630000000	2322500000	1344600000	1324300000	407510000	580630000	336160000	2400700000	4038300000	1673200000	2	2	2	32.7	32.7	32.7	15.265	0	42.598	5297200000	30	2	2	2	2	2	2	2	2	2	13	11	6
365	Q7JCZ0;A3R404;P03930	Q7JCZ0;A3R404;P03930	ATP synthase protein 8	mt-Atp8;ATP8;Mtatp8	tr|Q7JCZ0|Q7JCZ0_MOUSE ATP synthase protein 8 OS=Mus musculus GN=mt-Atp8 PE=1 SV=1;tr|A3R404|A3R404_MOUSE ATP synthase protein 8 OS=Mus musculus GN=ATP8 PE=3 SV=1;sp|P03930|ATP8_MOUSE ATP synthase protein 8 OS=Mus musculus GN=Mtatp8 PE=1 SV=1	1024000000	646990000	562210000	446650000	204800000	129400000	112440000	1696500000	1564400000	1416300000	2	2	2	34.3	34.3	34.3	7.7662	0	28.529	2233200000	9	2	2	2	2	2	2	2	2	2	4	3	2
366	A4FU75;Q6WQJ1	A4FU75;Q6WQJ1	Sn1-specific diacylglycerol lipase alpha	Dagla	tr|A4FU75|A4FU75_MOUSE Dagla protein (Fragment) OS=Mus musculus GN=Dagla PE=2 SV=1;sp|Q6WQJ1|DGLA_MOUSE Sn1-specific diacylglycerol lipase alpha OS=Mus musculus GN=Dagla PE=1 SV=2	584290000	504930000	630270000	33715000	11457000	9900500	12358000	918190000	873950000	918300000	16	16	16	21.2	21.2	21.2	115.24	0	66.151	1719500000	43	12	9	12	12	9	12	12	9	12	12	13	18
367	A4FUJ5;B2RTE5;Q3TMW1	A4FUJ5;B2RTE5;Q3TMW1	Coiled-coil domain-containing protein 102A	Ccdc102a	tr|A4FUJ5|A4FUJ5_MOUSE Ccdc102a protein (Fragment) OS=Mus musculus GN=Ccdc102a PE=2 SV=1;tr|B2RTE5|B2RTE5_MOUSE Coiled-coil domain containing 102A OS=Mus musculus GN=Ccdc102a PE=2 SV=1;sp|Q3TMW1|C102A_MOUSE Coiled-coil domain-containing protein 102A OS=Mus	17418000	0	0	622080	622080	0	0	23121000	0	0	2	1	1	5.9	4.6	4.6	52.765	0.0072646	1.4623	17418000	1	1	0	1	1	0	0	1	0	0	1	0	0
368	A4FUS1;Q641N3;Q5CZY9;P14131	A4FUS1;Q641N3;Q5CZY9;P14131	40S ribosomal protein S16	Rps16	tr|A4FUS1|A4FUS1_MOUSE MCG123443 OS=Mus musculus GN=Rps16 PE=2 SV=1;tr|Q641N3|Q641N3_MOUSE Rps16 protein (Fragment) OS=Mus musculus GN=Rps16 PE=2 SV=1;tr|Q5CZY9|Q5CZY9_MOUSE Rps16 protein OS=Mus musculus GN=Rps16 PE=2 SV=1;sp|P14131|RS16_MOUSE 40S ribosoma	24340000000	21794000000	16625000000	5229900000	2028300000	1816200000	1385400000	43652000000	44235000000	34492000000	11	11	11	59.6	59.6	59.6	16.445	0	28.144	62759000000	115	10	10	10	10	10	10	10	10	10	39	36	40
369	A4FUU4;Q64FW2;H3BJ51;H3BKK1;F7CW61	A4FUU4;Q64FW2;H3BJ51;H3BKK1	All-trans-retinol 13,14-reductase	Retsat	tr|A4FUU4|A4FUU4_MOUSE Retsat protein (Fragment) OS=Mus musculus GN=Retsat PE=2 SV=1;sp|Q64FW2|RETST_MOUSE All-trans-retinol 13,14-reductase OS=Mus musculus GN=Retsat PE=1 SV=3;tr|H3BJ51|H3BJ51_MOUSE All-trans-retinol 13,14-reductase OS=Mus musculus GN=Ret	171110000	159500000	129590000	12783000	4753100	4430700	3599600	330030000	272840000	271960000	5	5	5	11.5	11.5	11.5	67.016	0	19.03	460200000	17	4	4	5	4	4	5	4	4	5	6	6	5
370	A4FUV7;A4FUV6;F8VQL0;P16056;Q3TCS4;F6X333;F6RCC5;A2VCS0;Q6Q532;D3YVY2	A4FUV7;A4FUV6;F8VQL0;P16056	Receptor protein-tyrosine kinase;Hepatocyte growth factor receptor	Met	tr|A4FUV7|A4FUV7_MOUSE Met protein (Fragment) OS=Mus musculus GN=Met PE=2 SV=1;tr|A4FUV6|A4FUV6_MOUSE Met protein (Fragment) OS=Mus musculus GN=Met PE=2 SV=1;tr|F8VQL0|F8VQL0_MOUSE Hepatocyte growth factor receptor OS=Mus musculus GN=Met PE=3 SV=1;sp|P1605	819030000	696400000	491140000	28261000	11536000	9808400	6917400	1328000000	1180100000	1219400000	19	19	18	18.2	18.2	17.6	153.3	0	56.02	2006600000	53	15	13	12	15	13	12	14	12	11	18	18	17
371	A4FUW0;A4FUV9;Q8BFW4;Q8BFW4-2;Q8BJT1	A4FUW0;A4FUV9;Q8BFW4;Q8BFW4-2;Q8BJT1	Tripartite motif-containing protein 65	Trim65	tr|A4FUW0|A4FUW0_MOUSE Trim65 protein (Fragment) OS=Mus musculus GN=Trim65 PE=2 SV=1;tr|A4FUV9|A4FUV9_MOUSE Trim65 protein (Fragment) OS=Mus musculus GN=Trim65 PE=2 SV=1;sp|Q8BFW4|TRI65_MOUSE Tripartite motif-containing protein 65 OS=Mus musculus GN=Trim65	58657000	42973000	26538000	5126700	2346300	1718900	1061500	84938000	101420000	86920000	5	5	5	14.1	14.1	14.1	53.883	0	4.5956	128170000	11	3	2	4	3	2	4	3	2	4	3	3	5
372	A4QPD3;P15307	A4QPD3;P15307	Proto-oncogene c-Rel	Rel	tr|A4QPD3|A4QPD3_MOUSE Proto-oncogene c-Rel OS=Mus musculus GN=Rel PE=2 SV=1;sp|P15307|REL_MOUSE Proto-oncogene c-Rel OS=Mus musculus GN=Rel PE=1 SV=2	15650000	15671000	19687000	1645400	504850	505530	635060	28657000	37875000	34518000	2	1	1	3.9	2.4	2.4	65.144	0.0024645	1.964	51009000	3	2	2	2	1	1	1	1	1	1	1	1	1
373	A4QPF5;Q8C351;Q8C351-2	A4QPF5;Q8C351;Q8C351-2	Layilin	Layn	tr|A4QPF5|A4QPF5_MOUSE Layn protein OS=Mus musculus GN=Layn PE=2 SV=1;sp|Q8C351|LAYN_MOUSE Layilin OS=Mus musculus GN=Layn PE=1 SV=4;sp|Q8C351-2|LAYN_MOUSE Isoform 2 of Layilin OS=Mus musculus GN=Layn	60902000	23330000	20655000	7491900	4350100	1666400	1475300	105560000	76777000	55912000	2	2	2	6.2	6.2	6.2	36.448	0.00030595	2.6957	104890000	9	2	1	1	2	1	1	2	1	1	5	2	2
374	A5A4Z2;G3UZ30;A5A4Y9;A5A4Z1;A5A4Z0;Q8K1L5	A5A4Z2;G3UZ30;A5A4Y9;A5A4Z1;A5A4Z0;Q8K1L5	Protein phosphatase 1 regulatory subunit 11	Ppp1r11	tr|A5A4Z2|A5A4Z2_MOUSE TCTEX5 isoform 2 OS=Mus musculus GN=Ppp1r11 PE=2 SV=1;tr|G3UZ30|G3UZ30_MOUSE Protein phosphatase 1 regulatory subunit 11 (Fragment) OS=Mus musculus GN=Ppp1r11 PE=4 SV=2;tr|A5A4Y9|A5A4Y9_MOUSE Protein phosphatase 1 regulatory subunit	164650000	78307000	153330000	79257000	32931000	15661000	30665000	262510000	196740000	136470000	4	4	4	54.6	54.6	54.6	10.99	0	8.1653	396290000	15	2	2	4	2	2	4	2	2	4	5	5	5
375	A5CVE4;I1E4X8;B7ZN44;B2RQE3;P83093;F6WBP9;Q8BIM2	A5CVE4;I1E4X8;B7ZN44;B2RQE3;P83093;F6WBP9;Q8BIM2	Stromal interaction molecule 2	Stim2	tr|A5CVE4|A5CVE4_MOUSE MCG1293 OS=Mus musculus GN=Stim2 PE=2 SV=1;tr|I1E4X8|I1E4X8_MOUSE Stromal interaction molecule 2 OS=Mus musculus GN=Stim2 PE=1 SV=1;tr|B7ZN44|B7ZN44_MOUSE Stim2 protein OS=Mus musculus GN=Stim2 PE=2 SV=1;tr|B2RQE3|B2RQE3_MOUSE Stim2	98518000	41868000	9875000	3415000	2239000	951560	224430	96496000	50590000	38371000	7	6	6	18	15.8	15.8	83.924	0	23.529	150260000	10	5	5	2	4	4	2	4	4	2	4	4	2
376	B2RUK1;B7ZNY3;F6S7Z1;G3XA13;A5D6P2;Q99NH2;E0CY24;E0CXL4;F6TSJ9;E0CXR8;E0CZE2;E0CZ83;Q99NH2-4;Q99NH2-2;Q8BPQ6;Q8BPQ4;E9PYJ2;Q99NH2-5;Q99NH2-3;F6UGU7;E0CX45;Q4JJC0;F6TB42;F6URI7	B2RUK1;B7ZNY3;F6S7Z1;G3XA13;A5D6P2;Q99NH2;E0CY24;E0CXL4;F6TSJ9;E0CXR8;E0CZE2;E0CZ83;Q99NH2-4;Q99NH2-2;Q8BPQ6;Q8BPQ4;E9PYJ2;Q99NH2-5;Q99NH2-3	Partitioning defective 3 homolog	Pard3	tr|B2RUK1|B2RUK1_MOUSE Pard3 protein OS=Mus musculus GN=Pard3 PE=2 SV=1;tr|B7ZNY3|B7ZNY3_MOUSE Pard3 protein OS=Mus musculus GN=Pard3 PE=1 SV=1;tr|F6S7Z1|F6S7Z1_MOUSE Partitioning defective 3 homolog (Fragment) OS=Mus musculus GN=Pard3 PE=1 SV=1;tr|G3XA13|	11753000	57134000	262800000	4252400	150680	732490	3369200	64001000	131830000	346000000	11	11	11	11.7	11.7	11.7	145.67	0	16.457	331680000	11	2	5	7	2	5	7	2	5	7	1	5	5
377	A5D6P3;O35379;Q8C7V6;Q3UDM1;E9Q1I5;Q8BRD0;Q9JL41;D3YZY1;D3Z407;D3YYJ6;Q9CVX4	A5D6P3;O35379;Q8C7V6	Multidrug resistance-associated protein 1	Abcc1	tr|A5D6P3|A5D6P3_MOUSE ATP-binding cassette, sub-family C (CFTR/MRP), member 1 OS=Mus musculus GN=Abcc1 PE=2 SV=1;sp|O35379|MRP1_MOUSE Multidrug resistance-associated protein 1 OS=Mus musculus GN=Abcc1 PE=1 SV=1;tr|Q8C7V6|Q8C7V6_MOUSE Putative uncharacteri	1756200000	1692500000	1933500000	65637000	21417000	20641000	23579000	2736300000	2936300000	2954800000	34	34	33	30.4	30.4	29.5	171.18	0	142.77	5382200000	98	28	24	27	28	24	27	27	24	27	31	31	36
378	J3QP81;A5D6Q8;Q80TV8-2;B2RY22;E9Q6L0;E9QNY9;E9QKH0;Q80TV8;Q3TPM6	J3QP81;A5D6Q8;Q80TV8-2;B2RY22;E9Q6L0;E9QNY9;E9QKH0;Q80TV8	CLIP-associating protein 1	Clasp1	tr|J3QP81|J3QP81_MOUSE CLIP-associating protein 1 OS=Mus musculus GN=Clasp1 PE=1 SV=1;tr|A5D6Q8|A5D6Q8_MOUSE Clasp1 protein OS=Mus musculus GN=Clasp1 PE=2 SV=1;sp|Q80TV8-2|CLAP1_MOUSE Isoform 2 of CLIP-associating protein 1 OS=Mus musculus GN=Clasp1;tr|B2R	1921000000	3095900000	2450700000	75431000	19404000	31272000	24755000	4760300000	4872300000	4520100000	38	38	33	32.1	32.1	29.1	160.92	0	256.4	7467700000	119	27	29	33	27	29	33	23	26	28	36	42	41
379	A5GZX3;Q9CPU0	A5GZX3;Q9CPU0	Lactoylglutathione lyase	Glo1	tr|A5GZX3|A5GZX3_MOUSE Lactoylglutathione lyase OS=Mus musculus GN=Glo1 PE=2 SV=1;sp|Q9CPU0|LGUL_MOUSE Lactoylglutathione lyase OS=Mus musculus GN=Glo1 PE=1 SV=3	2272100000	2339200000	1845500000	586980000	206560000	212650000	167770000	4489800000	4654000000	3984600000	9	9	9	51.1	51.1	51.1	20.809	0	18.038	6456800000	59	8	7	8	8	7	8	8	7	8	21	17	21
380	A6H584	A6H584	Collagen alpha-5(VI) chain	Col6a5	sp|A6H584|CO6A5_MOUSE Collagen alpha-5(VI) chain OS=Mus musculus GN=Col6a5 PE=1 SV=3	0	0	0	0	0	0	0	0	0	0	1	1	1	0.3	0.3	0.3	289.51	1	-2	0	0	0	0	1	0	0	1	0	0	1	0	0	0
381	A6H5Z3;Q6PCN5;Q5DU10;A6H5Z3-2;Q9D4R7;Q8C1X1;Q8K2N8;Q8C203;E0CXR2	A6H5Z3;Q6PCN5;Q5DU10;A6H5Z3-2	Exocyst complex component 6B	Exoc6b	sp|A6H5Z3|EXC6B_MOUSE Exocyst complex component 6B OS=Mus musculus GN=Exoc6b PE=2 SV=1;tr|Q6PCN5|Q6PCN5_MOUSE Exoc6b protein (Fragment) OS=Mus musculus GN=Exoc6b PE=2 SV=1;tr|Q5DU10|Q5DU10_MOUSE MKIAA0919 protein (Fragment) OS=Mus musculus GN=Exoc6b PE=2 S	480340000	303960000	308050000	20610000	9063000	5735200	5812200	632380000	668660000	794560000	14	14	14	22.6	22.6	22.6	94.128	0	20.301	1092300000	29	11	7	7	11	7	7	11	7	7	15	8	6
382	Q4QQR6;F7BJB9;A6H605;Q6A0C2;Q8R0R0	Q4QQR6;F7BJB9;A6H605;Q6A0C2;Q8R0R0		Morc3	tr|Q4QQR6|Q4QQR6_MOUSE Microrchidia 3 OS=Mus musculus GN=Morc3 PE=2 SV=1;tr|F7BJB9|F7BJB9_MOUSE Protein Morc3 OS=Mus musculus GN=Morc3 PE=4 SV=1;tr|A6H605|A6H605_MOUSE Microrchidia 3 OS=Mus musculus GN=Morc3 PE=2 SV=1;tr|Q6A0C2|Q6A0C2_MOUSE MKIAA0136 prote	393410000	243350000	239110000	15641000	7025100	4345600	4269800	498610000	451660000	511680000	14	14	14	23.9	23.9	23.9	106.5	0	39.994	875870000	34	12	9	11	12	9	11	12	9	11	12	11	11
383	A6H611;Q8BLL4	A6H611;Q8BLL4	Mitochondrial intermediate peptidase	Mipep	sp|A6H611|MIPEP_MOUSE Mitochondrial intermediate peptidase OS=Mus musculus GN=Mipep PE=2 SV=1;tr|Q8BLL4|Q8BLL4_MOUSE Putative uncharacterized protein OS=Mus musculus GN=Mipep PE=2 SV=1	260630000	237030000	88595000	12745000	5665800	5152800	1926000	329340000	348010000	299110000	9	9	9	20.7	20.7	20.7	80.851	0	20.097	586250000	21	8	7	4	8	7	4	8	7	4	8	8	5
384	A6H614;Q5Y5T2	A6H614;Q5Y5T2	Palmitoyltransferase;Palmitoyltransferase ZDHHC18	Zdhhc18	tr|A6H614|A6H614_MOUSE Palmitoyltransferase (Fragment) OS=Mus musculus GN=Zdhhc18 PE=2 SV=1;sp|Q5Y5T2|ZDH18_MOUSE Palmitoyltransferase ZDHHC18 OS=Mus musculus GN=Zdhhc18 PE=1 SV=4	10136000	0	0	844660	844660	0	0	13563000	0	0	1	1	1	5.2	5.2	5.2	29.588	0.0042863	1.7703	10136000	0	1	0	0	1	0	0	1	0	0	0	0	0
385	A6H619-2;A6H619;F7ANA1;Q3TPL9;Q3TPE7;Q3UVM8;Q7TPB8;F6WXS6	A6H619-2;A6H619;F7ANA1	PHD and RING finger domain-containing protein 1	Phrf1	sp|A6H619-2|PHRF1_MOUSE Isoform 2 of PHD and RING finger domain-containing protein 1 OS=Mus musculus GN=Phrf1;sp|A6H619|PHRF1_MOUSE PHD and RING finger domain-containing protein 1 OS=Mus musculus GN=Phrf1 PE=2 SV=2;tr|F7ANA1|F7ANA1_MOUSE PHD and RING finge	169220000	159480000	169500000	8167300	2774100	2614500	2778700	309890000	344420000	443720000	5	5	5	8	8	8	167.29	0	12.53	498200000	13	4	3	4	4	3	4	4	3	4	5	4	4
386	A6H630;A6H630-2;A6H630-4;D6RG65;A6H630-3	A6H630;A6H630-2;A6H630-4	Protein-glutamate O-methyltransferase	Armt1	sp|A6H630|CF211_MOUSE UPF0364 protein C6orf211 homolog OS=Mus musculus PE=2 SV=1;sp|A6H630-2|CF211_MOUSE Isoform 2 of UPF0364 protein C6orf211 homolog OS=Mus musculus;sp|A6H630-4|CF211_MOUSE Isoform 4 of UPF0364 protein C6orf211 homolog OS=Mus musculus	374310000	225490000	265270000	32040000	13863000	8351400	9824700	581110000	382390000	525820000	10	10	10	29.8	29.8	29.8	50.548	0	20.074	865070000	25	8	7	6	8	7	6	8	7	6	8	9	8
387	A6H659;Q3U1F9	A6H659;Q3U1F9	Phosphoprotein associated with glycosphingolipid-enriched microdomains 1	Pag1	tr|A6H659|A6H659_MOUSE Pag1 protein OS=Mus musculus GN=Pag1 PE=2 SV=1;sp|Q3U1F9|PHAG1_MOUSE Phosphoprotein associated with glycosphingolipid-enriched microdomains 1 OS=Mus musculus GN=Pag1 PE=1 SV=2	93265000	87404000	89927000	14242000	4908700	4600200	4733000	92574000	95360000	92061000	3	3	3	14.2	14.2	14.2	46.549	0	4.6209	270600000	6	2	2	2	2	2	2	2	2	2	2	2	2
388	A6H663;Q9JLV1;Q3TAM9;Q9ER87	A6H663;Q9JLV1;Q3TAM9	BAG family molecular chaperone regulator 3	Bag3	tr|A6H663|A6H663_MOUSE BCL2-associated athanogene 3 OS=Mus musculus GN=Bag3 PE=2 SV=1;sp|Q9JLV1|BAG3_MOUSE BAG family molecular chaperone regulator 3 OS=Mus musculus GN=Bag3 PE=1 SV=2;tr|Q3TAM9|Q3TAM9_MOUSE Putative uncharacterized protein OS=Mus musculus	3015400000	3160700000	3363800000	244610000	77318000	81043000	86251000	5056000000	5274100000	4841500000	29	29	29	62.6	62.6	62.6	61.858	0	95.536	9539900000	118	27	23	21	27	23	21	27	23	21	38	42	38
389	G5E8Q7;A6H687	G5E8Q7;A6H687	SAC3 domain-containing protein 1	Sac3d1	tr|G5E8Q7|G5E8Q7_MOUSE SAC3 domain containing 1, isoform CRA_c OS=Mus musculus GN=Sac3d1 PE=4 SV=1;sp|A6H687|SAC31_MOUSE SAC3 domain-containing protein 1 OS=Mus musculus GN=Sac3d1 PE=1 SV=1	16385000	0	12140000	1296600	744790	0	551830	0	0	27417000	2	2	2	8.9	8.9	8.9	46.412	0	3.5621	28526000	2	1	0	1	1	0	1	1	0	1	0	0	2
390	F7B6A4;F7C1U0;E0CZ97;A6H697;F6SYN4;E0CYD2;E0CYQ0	F7B6A4;F7C1U0;E0CZ97;A6H697;F6SYN4;E0CYD2;E0CYQ0		Kctd17	tr|F7B6A4|F7B6A4_MOUSE Protein Kctd17 (Fragment) OS=Mus musculus GN=Kctd17 PE=4 SV=1;tr|F7C1U0|F7C1U0_MOUSE Protein Kctd17 (Fragment) OS=Mus musculus GN=Kctd17 PE=4 SV=1;tr|E0CZ97|E0CZ97_MOUSE Protein Kctd17 OS=Mus musculus GN=Kctd17 PE=4 SV=1;tr|A6H697|A6	93914000	57932000	50583000	18403000	8537600	5266600	4598500	72585000	71785000	63383000	1	1	1	7.3	7.3	7.3	23.641	0	12.784	202430000	4	1	1	1	1	1	1	1	1	1	2	1	1
391	A6H6A9;A6H6A9-2	A6H6A9;A6H6A9-2	Rab GTPase-activating protein 1-like	Rabgap1l	sp|A6H6A9|RBG1L_MOUSE Rab GTPase-activating protein 1-like OS=Mus musculus GN=Rabgap1l PE=1 SV=1;sp|A6H6A9-2|RBG1L_MOUSE Isoform 2 of Rab GTPase-activating protein 1-like OS=Mus musculus GN=Rabgap1l	72206000	44313000	57209000	3948300	1641000	1007100	1300200	121850000	113320000	140840000	5	3	3	6.4	4.4	4.4	92.403	0	6.6958	173730000	7	5	4	4	3	3	3	3	3	3	2	2	3
392	B7ZNM1;Q3ULP3;Q3TX60;A6H6B3;Q62172;Q3TDW9	B7ZNM1;Q3ULP3;Q3TX60;A6H6B3;Q62172;Q3TDW9	RalA-binding protein 1	Ralbp1	tr|B7ZNM1|B7ZNM1_MOUSE Ralbp1 protein OS=Mus musculus GN=Ralbp1 PE=2 SV=1;tr|Q3ULP3|Q3ULP3_MOUSE Putative uncharacterized protein OS=Mus musculus GN=Ralbp1 PE=2 SV=1;tr|Q3TX60|Q3TX60_MOUSE Putative uncharacterized protein OS=Mus musculus GN=Ralbp1 PE=2 SV=	0	28581000	32998000	1759400	0	816600	942800	0	29827000	34824000	2	2	2	6.4	6.4	6.4	68.751	0	3.9734	61579000	3	0	2	1	0	2	1	0	2	1	0	2	1
393	B7ZNL7;A6H6B9;Q60821	B7ZNL7;A6H6B9;Q60821	Zinc finger and BTB domain-containing protein 17	Zbtb17	tr|B7ZNL7|B7ZNL7_MOUSE Zinc finger and BTB domain containing 17 OS=Mus musculus GN=Zbtb17 PE=2 SV=1;tr|A6H6B9|A6H6B9_MOUSE Zinc finger and BTB domain containing 17 OS=Mus musculus GN=Zbtb17 PE=2 SV=1;sp|Q60821|ZBT17_MOUSE Zinc finger and BTB domain-contain	8512000	10190000	9709800	557090	166900	199800	190390	8512000	10634000	10247000	1	1	1	2	2	2	86.741	0	4.8403	28412000	3	1	1	1	1	1	1	1	1	1	1	1	1
394	A6H6H4;Q6ZWY8	A6H6H4;Q6ZWY8	Thymosin beta-10	Tmsb10	tr|A6H6H4|A6H6H4_MOUSE MCG125727 OS=Mus musculus GN=Tmsb10 PE=2 SV=1;sp|Q6ZWY8|TYB10_MOUSE Thymosin beta-10 OS=Mus musculus GN=Tmsb10 PE=2 SV=3	680880000	687670000	649270000	504450000	170220000	171920000	162320000	690210000	764200000	682930000	1	1	1	31.8	31.8	31.8	5.0256	0	3.7981	2017800000	3	1	1	1	1	1	1	1	1	1	1	1	1
395	F6UK66;Q3TNK7;A6H6M8;Q810U5-3;Q810U5-2;Q810U5	F6UK66;Q3TNK7;A6H6M8;Q810U5-3;Q810U5-2;Q810U5	Coiled-coil domain-containing protein 50	Ccdc50	tr|F6UK66|F6UK66_MOUSE Coiled-coil domain-containing protein 50 (Fragment) OS=Mus musculus GN=Ccdc50 PE=4 SV=1;tr|Q3TNK7|Q3TNK7_MOUSE Coiled-coil domain containing 50 OS=Mus musculus GN=Ccdc50 PE=2 SV=1;tr|A6H6M8|A6H6M8_MOUSE Coiled-coil domain containing	33040000	24848000	108200000	9769900	1943500	1461600	6364700	65596000	61506000	107100000	2	2	2	15.2	15.2	15.2	29.684	0	3.2672	166090000	4	1	1	2	1	1	2	1	1	2	1	1	2
396	A6H6S8;Q8CI61	A6H6S8;Q8CI61	BAG family molecular chaperone regulator 4	Bag4	tr|A6H6S8|A6H6S8_MOUSE BCL2-associated athanogene 4 OS=Mus musculus GN=Bag4 PE=2 SV=1;sp|Q8CI61|BAG4_MOUSE BAG family molecular chaperone regulator 4 OS=Mus musculus GN=Bag4 PE=1 SV=2	0	23124000	55191000	4894600	0	1445200	3449400	0	44821000	59537000	3	3	3	9.4	9.4	9.4	49.094	0	13.79	78314000	3	0	2	2	0	2	2	0	2	2	0	1	2
397	A6H8H2;A6H8H2-2;E9Q449;Q3U2Y9	A6H8H2;A6H8H2-2;E9Q449	DENN domain-containing protein 4C	Dennd4c	sp|A6H8H2|DEN4C_MOUSE DENN domain-containing protein 4C OS=Mus musculus GN=Dennd4c PE=1 SV=1;sp|A6H8H2-2|DEN4C_MOUSE Isoform 2 of DENN domain-containing protein 4C OS=Mus musculus GN=Dennd4c;tr|E9Q449|E9Q449_MOUSE DENN domain-containing protein 4C OS=Mus m	1186300000	1257800000	1149400000	35580000	11746000	12454000	11380000	2037400000	2246900000	2251200000	32	32	32	27.2	27.2	27.2	211.46	0	107.57	3593600000	73	16	20	21	16	20	21	16	20	21	21	26	26
398	A6MDC5;Q8VE98	A6MDC5;Q8VE98	CD276 antigen	Cd276	tr|A6MDC5|A6MDC5_MOUSE CD276 antigen OS=Mus musculus GN=Cd276 PE=2 SV=1;sp|Q8VE98|CD276_MOUSE CD276 antigen OS=Mus musculus GN=Cd276 PE=1 SV=1	22749000	24599000	43928000	7606400	1895800	2049900	3660600	38263000	33733000	70977000	2	2	2	6.3	6.3	6.3	34.001	0	4.522	91276000	5	2	2	1	2	2	1	2	2	1	2	2	1
399	A6MDD3;Q8R422	A6MDD3;Q8R422	CD109 antigen	Cd109	tr|A6MDD3|A6MDD3_MOUSE CD109 antigen OS=Mus musculus GN=Cd109 PE=2 SV=1;sp|Q8R422|CD109_MOUSE CD109 antigen OS=Mus musculus GN=Cd109 PE=2 SV=1	4699100000	4125100000	4071300000	176650000	64371000	56508000	55771000	7319200000	7362100000	7193200000	40	40	40	36.7	36.7	36.7	161.66	0	174.41	12895000000	146	33	33	36	33	33	36	33	33	36	41	51	54
400	A6P3E4;G3X8U9;Q544A0;Q7TSJ7;Q91Y86;D3Z1Z4;A3KBF5	A6P3E4;G3X8U9;Q544A0;Q7TSJ7;Q91Y86;D3Z1Z4	Mitogen-activated protein kinase;Mitogen-activated protein kinase 8	Mapk8	tr|A6P3E4|A6P3E4_MOUSE JNK1 beta1 protein kinase OS=Mus musculus GN=Mapk8 PE=1 SV=1;tr|G3X8U9|G3X8U9_MOUSE Mitogen activated protein kinase 8, isoform CRA_b OS=Mus musculus GN=Mapk8 PE=4 SV=1;tr|Q544A0|Q544A0_MOUSE Mitogen activated protein kinase 8, isofo	96805000	125700000	97206000	13321000	4033600	5237500	4050300	245470000	244420000	177130000	6	5	4	25	22.4	18.8	44.021	0	11.104	319710000	14	4	5	4	3	5	4	2	4	3	4	6	4
401	B7ZP08;A6PWV5	B7ZP08;A6PWV5	AT-rich interactive domain-containing protein 3C	Arid3c	tr|B7ZP08|B7ZP08_MOUSE AT-rich interactive domain-containing protein 3C OS=Mus musculus GN=Arid3c PE=2 SV=1;sp|A6PWV5|ARI3C_MOUSE AT-rich interactive domain-containing protein 3C OS=Mus musculus GN=Arid3c PE=2 SV=2	47042000	0	43902000	4330700	2240100	0	2090600	58455000	0	43956000	1	1	1	2.6	2.6	2.6	40.549	0.0044279	1.7693	90944000	2	1	0	1	1	0	1	1	0	1	1	0	1
402	A6PWX9;Q9CWU6;A6PWX5;A6PWX7;F6V305;A6PWX8;D6RJ83;Q9CWU6-2	A6PWX9;Q9CWU6;A6PWX5;A6PWX7;F6V305;A6PWX8	Ubiquinol-cytochrome-c reductase complex assembly factor 1	Uqcc1	tr|A6PWX9|A6PWX9_MOUSE Ubiquinol-cytochrome-c reductase complex assembly factor 1 OS=Mus musculus GN=Uqcc1 PE=4 SV=1;sp|Q9CWU6|UQCC1_MOUSE Ubiquinol-cytochrome-c reductase complex assembly factor 1 OS=Mus musculus GN=Uqcc1 PE=2 SV=1;tr|A6PWX5|A6PWX5_MOUSE	244490000	220350000	413350000	48788000	13583000	12241000	22964000	463670000	372390000	395750000	3	3	3	14.5	14.5	14.5	31.32	0	8.0892	878190000	12	3	3	2	3	3	2	3	3	2	4	4	4
403	A6PWY4-2;A6PWY4;Z4YK23;A6PWY4-3	A6PWY4-2;A6PWY4	WD repeat-containing protein 76	Wdr76	sp|A6PWY4-2|WDR76_MOUSE Isoform 2 of WD repeat-containing protein 76 OS=Mus musculus GN=Wdr76;sp|A6PWY4|WDR76_MOUSE WD repeat-containing protein 76 OS=Mus musculus GN=Wdr76 PE=2 SV=1	174900000	118210000	140350000	14947000	6031200	4076100	4839700	252410000	201280000	316290000	5	5	5	13.4	13.4	13.4	57.96	0	16.581	433460000	17	5	3	3	5	3	3	5	3	3	7	5	5
404	Q8C913;A6QRF1;F2Z3W1;F2Z444;Q6A000	Q8C913;A6QRF1;F2Z3W1;F2Z444;Q6A000	Uncharacterized protein KIAA0753	4933427D14Rik;Kiaa0753	tr|Q8C913|Q8C913_MOUSE Putative uncharacterized protein OS=Mus musculus PE=2 SV=1;tr|A6QRF1|A6QRF1_MOUSE Protein 4933427D14Rik OS=Mus musculus GN=4933427D14Rik PE=4 SV=1;tr|F2Z3W1|F2Z3W1_MOUSE Protein 4933427D14Rik OS=Mus musculus GN=4933427D14Rik PE=4 SV=	17093000	15638000	0	1423100	743190	679890	0	26846000	24723000	0	2	2	2	7.1	7.1	7.1	35.159	1	-2	32731000	1	1	2	1	1	2	1	1	2	1	1	0	0
405	A6X919;A6X919-2;A6X919-3;P0CW70	A6X919;A6X919-2	Probable C-mannosyltransferase DPY19L1	Dpy19l1	sp|A6X919|D19L1_MOUSE Probable C-mannosyltransferase DPY19L1 OS=Mus musculus GN=Dpy19l1 PE=2 SV=1;sp|A6X919-2|D19L1_MOUSE Isoform 2 of Probable C-mannosyltransferase DPY19L1 OS=Mus musculus GN=Dpy19l1	492120000	579330000	521580000	46854000	14474000	17039000	15341000	1042800000	1023400000	1210500000	12	12	12	23.1	23.1	23.1	84.186	0	19.012	1593000000	29	8	10	9	8	10	9	8	10	9	9	12	8
406	E9Q5L2;E9PVD2;A6X935-2;A6X935	E9Q5L2;E9PVD2;A6X935-2;A6X935	Inter alpha-trypsin inhibitor, heavy chain 4	Itih4	tr|E9Q5L2|E9Q5L2_MOUSE Inter alpha-trypsin inhibitor, heavy chain 4 OS=Mus musculus GN=Itih4 PE=4 SV=1;tr|E9PVD2|E9PVD2_MOUSE Inter alpha-trypsin inhibitor, heavy chain 4 OS=Mus musculus GN=Itih4 PE=4 SV=1;sp|A6X935-2|ITIH4_MOUSE Isoform 2 of Inter alpha-t	0	0	0	0	0	0	0	0	0	0	1	1	1	1.6	1.6	1.6	102.82	1	-2	0	0	1	0	1	1	0	1	1	0	1	0	0	0
407	A6X942	A6X942	SH2 domain-containing protein 4B	Sh2d4b	sp|A6X942|SH24B_MOUSE SH2 domain-containing protein 4B OS=Mus musculus GN=Sh2d4b PE=2 SV=1	0	0	18765000	721740	0	0	721740	0	0	19803000	2	2	2	5.1	5.1	5.1	51.119	0.0037297	1.8255	18765000	1	1	1	1	1	1	1	1	1	1	0	0	1
408	A6ZI44;D3YV98;Q3UER1;Q3TJ66;Q91Y97	A6ZI44;D3YV98	Fructose-bisphosphate aldolase	Aldoa	tr|A6ZI44|A6ZI44_MOUSE Aldolase A splice variant 2 OS=Mus musculus GN=Aldoa PE=2 SV=1;tr|D3YV98|D3YV98_MOUSE Fructose-bisphosphate aldolase A (Fragment) OS=Mus musculus GN=Aldoa PE=4 SV=1	494310000	498090000	319460000	52474000	19772000	19923000	12778000	672630000	788440000	378370000	27	1	1	72.2	4.8	4.8	45.12	0	6.572	1311800000	7	27	27	26	1	1	1	1	1	1	2	3	2
409	Q9CPQ9;A6ZI46	Q9CPQ9;A6ZI46	Fructose-bisphosphate aldolase	Aldoart1	tr|Q9CPQ9|Q9CPQ9_MOUSE Protein Aldoart1 OS=Mus musculus GN=Aldoart1 PE=2 SV=1;tr|A6ZI46|A6ZI46_MOUSE Aldolase A retroprotein 1 OS=Mus musculus GN=Aldoart1 PE=2 SV=1	0	0	121600000	5287000	0	0	5287000	0	0	274610000	18	1	0	49.2	8.2	0	39.284	1	-2	121600000	2	17	17	17	0	0	1	0	0	0	0	0	2
410	A7ISP9;F8WJ93;Q3UMY5;Q3UMY5-4;Q3UMY5-2;Q3UMY5-3;Q3TGL8	A7ISP9;F8WJ93;Q3UMY5;Q3UMY5-4;Q3UMY5-2;Q3UMY5-3	Echinoderm microtubule-associated protein-like 4	Eml4	tr|A7ISP9|A7ISP9_MOUSE EMAP-like protein 4 OS=Mus musculus GN=Eml4 PE=2 SV=1;tr|F8WJ93|F8WJ93_MOUSE Echinoderm microtubule-associated protein-like 4 OS=Mus musculus GN=Eml4 PE=1 SV=1;sp|Q3UMY5|EMAL4_MOUSE Echinoderm microtubule-associated protein-like 4 OS	408530000	276780000	2207100000	50743000	7167100	4855700	38720000	957050000	845600000	1673600000	11	11	11	16.9	16.9	16.9	108.71	0	28.356	2892400000	18	7	5	8	7	5	8	7	5	8	6	4	8
411	A7MCT8;Q3UNI1;Q53Z05;Q923E4;Q923E4-2;Q3USY7	A7MCT8;Q3UNI1;Q53Z05;Q923E4;Q923E4-2	NAD-dependent protein deacetylase sirtuin-1;SirtT1 75 kDa fragment	Sirt1	tr|A7MCT8|A7MCT8_MOUSE Sirt1 protein OS=Mus musculus GN=Sirt1 PE=2 SV=1;tr|Q3UNI1|Q3UNI1_MOUSE NAD-dependent protein deacetylase sirtuin-1 OS=Mus musculus GN=Sirt1 PE=2 SV=1;tr|Q53Z05|Q53Z05_MOUSE Sir2alpha OS=Mus musculus GN=Sirt1 PE=2 SV=1;sp|Q923E4|SIR1	47971000	42044000	55320000	4844500	1599000	1401500	1844000	97400000	98545000	107430000	3	3	3	7.6	7.6	7.6	64.114	0.00015427	2.8375	145340000	5	1	2	2	1	2	2	1	2	2	1	2	2
412	A7VJ98;Q9CQI3;Q80X87;D3YY93;D3Z2F6;D3YY16;A7VJA4;Q9ERL7	A7VJ98;Q9CQI3;Q80X87	Glia maturation factor beta	Gmfb	tr|A7VJ98|A7VJ98_MOUSE Glia maturation factor beta OS=Mus musculus GN=Gmfb PE=2 SV=1;sp|Q9CQI3|GMFB_MOUSE Glia maturation factor beta OS=Mus musculus GN=Gmfb PE=1 SV=3;tr|Q80X87|Q80X87_MOUSE Glia maturation factor, beta OS=Mus musculus GN=Gmfb PE=2 SV=1	1838900000	2255200000	1473800000	556790000	183890000	225520000	147380000	2203900000	2173400000	2054700000	6	6	6	53.5	53.5	53.5	16.722	0	86.52	5567900000	19	4	6	6	4	6	6	4	6	6	4	7	8
413	Q3UDG0;Q3THE7;A7VL18;Q3U367;Q3TG52;Q9JLJ2;Q3TMT4;Q3V1N7;Q9CRH9	Q3UDG0;Q3THE7;A7VL18;Q3U367;Q3TG52;Q9JLJ2;Q3TMT4;Q3V1N7	4-trimethylaminobutyraldehyde dehydrogenase	Aldh9a1	tr|Q3UDG0|Q3UDG0_MOUSE Putative uncharacterized protein OS=Mus musculus GN=Aldh9a1 PE=2 SV=1;tr|Q3THE7|Q3THE7_MOUSE Putative uncharacterized protein OS=Mus musculus GN=Aldh9a1 PE=2 SV=1;tr|A7VL18|A7VL18_MOUSE Gamma-aminobutyraldehyde dehydrogenase OS=Mus m	4893000000	5031000000	4767800000	506610000	168720000	173480000	164410000	8470300000	9096400000	8816000000	18	18	18	52.2	52.2	52.2	53.48	0	108.03	14692000000	77	17	15	15	17	15	15	17	15	15	28	25	24
414	A7YY80;D0VYV7;Q8BGK4;Q8BT38;A7MCX4	A7YY80;D0VYV7;Q8BGK4		Epb4.1l3	tr|A7YY80|A7YY80_MOUSE 130kDa Protein 4.1B MEF cell isoform OS=Mus musculus GN=Epb4.1l3 PE=2 SV=1;tr|D0VYV7|D0VYV7_MOUSE Erythrocyte protein band 4.1-like 3 isoform C OS=Mus musculus GN=Epb4.1l3 PE=2 SV=1;tr|Q8BGK4|Q8BGK4_MOUSE Putative uncharacterized pro	5031900000	4482800000	5122100000	276170000	94942000	84581000	96643000	7365800000	7079800000	7679000000	34	30	0	51.1	47	0	97.596	0	200.76	14637000000	140	27	27	31	23	23	27	0	0	0	44	43	53
415	G3UXG8;F6RYG0;A8C1S6;Q6PGD0	G3UXG8;F6RYG0;A8C1S6;Q6PGD0	All-trans retinoic acid-induced differentiation factor	Atraid	tr|G3UXG8|G3UXG8_MOUSE All-trans retinoic acid-induced differentiation factor (Fragment) OS=Mus musculus GN=Atraid PE=4 SV=1;tr|F6RYG0|F6RYG0_MOUSE All-trans retinoic acid-induced differentiation factor (Fragment) OS=Mus musculus GN=Atraid PE=4 SV=1;tr|A8C	85977000	62866000	83268000	29014000	10747000	7858200	10409000	85977000	65606000	87874000	1	1	1	7	7	7	15.138	0.0047062	1.7433	232110000	3	1	1	1	1	1	1	1	1	1	1	1	1
416	A8C1T7;Q91XD7	A8C1T7;Q91XD7	Cysteine-rich with EGF-like domain protein 1	Creld1	tr|A8C1T7|A8C1T7_MOUSE Cysteine-rich with EGF-like domains 1 OS=Mus musculus GN=Creld1 PE=2 SV=1;sp|Q91XD7|CREL1_MOUSE Cysteine-rich with EGF-like domain protein 1 OS=Mus musculus GN=Creld1 PE=2 SV=1	875450000	405370000	555240000	79829000	38063000	17625000	24141000	1207400000	1092200000	988950000	8	8	8	30.7	30.7	30.7	45.717	0	31.11	1836100000	29	6	6	7	6	6	7	6	6	7	11	8	10
417	A8C1U1;Q80XR4;Q545L1;Q3TXC6;Q3TVZ0;Q3THL4;Q3U364;Q9QY33;Q8BPU2	A8C1U1;Q80XR4;Q545L1;Q3TXC6;Q3TVZ0;Q3THL4;Q3U364;Q9QY33	Tetraspanin;Tetraspanin-3	Tspan3	tr|A8C1U1|A8C1U1_MOUSE H41D4 protein (Fragment) OS=Mus musculus GN=Tspan3 PE=2 SV=1;tr|Q80XR4|Q80XR4_MOUSE Tetraspanin 3 OS=Mus musculus GN=Tspan3 PE=2 SV=1;tr|Q545L1|Q545L1_MOUSE Tetraspanin OS=Mus musculus GN=Tspan3 PE=2 SV=1;tr|Q3TXC6|Q3TXC6_MOUSE Putat	116140000	106770000	274300000	55245000	12904000	11863000	30477000	0	267220000	243070000	3	3	3	9.2	9.2	9.2	27.599	0	3.7454	497200000	6	1	1	2	1	1	2	1	1	2	1	3	2
418	A8C756;A8C756-2;A8C756-3;A8C756-4;A8C756-5	A8C756	Thyroid adenoma-associated protein homolog	Thada	sp|A8C756|THADA_MOUSE Thyroid adenoma-associated protein homolog OS=Mus musculus GN=Thada PE=2 SV=1	1072000000	705180000	872110000	24760000	10019000	6590400	8150600	1613700000	1540200000	1421100000	32	32	32	22.5	22.5	22.5	217.29	0	69.955	2649300000	73	25	21	20	25	21	20	25	21	20	26	22	25
419	A8CVP4;A8CVP1;Q4ZJB3;E9QP62;Q99JW4;Q9D7B2;Q91XD2	A8CVP4;A8CVP1;Q4ZJB3;E9QP62;Q99JW4;Q9D7B2	LIM and senescent cell antigen-like-containing domain protein 1	Lims1	tr|A8CVP4|A8CVP4_MOUSE LIM and senescent cell antigen-like domains 1 isoform B OS=Mus musculus GN=Lims1 PE=2 SV=1;tr|A8CVP1|A8CVP1_MOUSE LIM and senescent cell antigen-like domains 1 isoform D OS=Mus musculus GN=Lims1 PE=2 SV=1;tr|Q4ZJB3|Q4ZJB3_MOUSE Lims	1508100000	2270200000	1378000000	271390000	79376000	119480000	72525000	2181600000	2552300000	2318000000	13	13	13	44	44	44	37.241	0	28.297	5156300000	49	11	11	9	11	11	9	11	11	9	17	18	14
420	A8IP69;P61982	A8IP69;P61982	14-3-3 protein gamma;14-3-3 protein gamma, N-terminally processed	Ywhag	tr|A8IP69|A8IP69_MOUSE 14-3-3 protein gamma subtype OS=Mus musculus GN=Ywhag PE=2 SV=1;sp|P61982|1433G_MOUSE 14-3-3 protein gamma OS=Mus musculus GN=Ywhag PE=1 SV=2	12815000000	11403000000	11612000000	1990600000	711920000	633500000	645140000	12557000000	11714000000	12852000000	17	14	12	74.1	68	60.3	28.302	0	129.94	35830000000	125	16	16	17	13	13	14	11	11	12	43	40	42
421	A8Y5I6;Q9CWX6;Q8R5B4;Q9WV72	A8Y5I6;Q9CWX6;Q8R5B4;Q9WV72	Ankyrin repeat and SOCS box protein 3	Asb3	tr|A8Y5I6|A8Y5I6_MOUSE Ankyrin repeat and SOCS box protein 3 OS=Mus musculus GN=Asb3 PE=4 SV=1;tr|Q9CWX6|Q9CWX6_MOUSE Putative uncharacterized protein OS=Mus musculus GN=Asb3 PE=2 SV=1;tr|Q8R5B4|Q8R5B4_MOUSE Ankyrin repeat and SOCS box-containing 3 OS=Mus	10460000	13047000	13393000	2635700	747140	931930	956630	0	32676000	30245000	1	1	1	3	3	3	51.203	0.0053817	1.6423	36900000	2	1	1	1	1	1	1	1	1	1	0	1	1
422	A8Y5J3;Q9CWS4;D6RH69	A8Y5J3;Q9CWS4	Integrator complex subunit 11	Cpsf3l	tr|A8Y5J3|A8Y5J3_MOUSE Integrator complex subunit 11 OS=Mus musculus GN=Cpsf3l PE=4 SV=1;sp|Q9CWS4|INT11_MOUSE Integrator complex subunit 11 OS=Mus musculus GN=Cpsf3l PE=2 SV=1	343510000	294710000	218570000	24480000	9814700	8420300	6244900	522860000	507640000	457120000	6	6	6	13.8	13.8	13.8	65.42	0	15.06	856800000	19	4	6	4	4	6	4	4	6	4	6	7	6
423	A8Y5T6;Q8CFI5;Q3U4M2;A2AVQ7	A8Y5T6;Q8CFI5;Q3U4M2	Probable proline--tRNA ligase, mitochondrial	Pars2	tr|A8Y5T6|A8Y5T6_MOUSE Probable proline--tRNA ligase, mitochondrial OS=Mus musculus GN=Pars2 PE=3 SV=1;sp|Q8CFI5|SYPM_MOUSE Probable proline--tRNA ligase, mitochondrial OS=Mus musculus GN=Pars2 PE=2 SV=2;tr|Q3U4M2|Q3U4M2_MOUSE Putative uncharacterized prot	190670000	179900000	33960000	13049000	6150700	5803200	1095500	357730000	254290000	72173000	6	6	6	16.4	16.4	16.4	57.735	0	8.6338	404530000	9	5	4	1	5	4	1	5	4	1	5	3	1
424	A9C491;Q8VE73;Q8VE73-3;E9Q6H4;Q3U270;Q3UMJ6;F6Q1R4;Q8BUW2;Q80TT8-4	A9C491;Q8VE73;Q8VE73-3	Cullin-7	Cul7	tr|A9C491|A9C491_MOUSE Cullin 7 OS=Mus musculus GN=Cul7 PE=2 SV=1;sp|Q8VE73|CUL7_MOUSE Cullin-7 OS=Mus musculus GN=Cul7 PE=1 SV=2;sp|Q8VE73-3|CUL7_MOUSE Isoform 2 of Cullin-7 OS=Mus musculus GN=Cul7	77248000	157780000	179580000	4146100	772480	1577800	1795800	282470000	261240000	308720000	14	14	12	10.2	10.2	9.3	192.29	0	20.621	414610000	25	7	10	9	7	10	9	6	8	7	5	11	9
425	A9CLV6;Q9QZI8;E9Q553;Q8C5F9;E9PY81	A9CLV6;Q9QZI8;E9Q553;Q8C5F9;E9PY81	Serine incorporator 1	Serinc1	tr|A9CLV6|A9CLV6_MOUSE Axotomy induced glycoprotein 2 OS=Mus musculus GN=Serinc1 PE=2 SV=1;sp|Q9QZI8|SERC1_MOUSE Serine incorporator 1 OS=Mus musculus GN=Serinc1 PE=1 SV=1;tr|E9Q553|E9Q553_MOUSE Serine incorporator 1 OS=Mus musculus GN=Serinc1 PE=4 SV=1;tr	257410000	202340000	151910000	32193000	13548000	10650000	7995200	437400000	453350000	407480000	2	2	2	5.5	5.5	5.5	50.508	0	4.7388	611660000	8	2	2	2	2	2	2	2	2	2	3	3	2
426	A9DA50;Q9D1T0	A9DA50;Q9D1T0	Leucine-rich repeat and immunoglobulin-like domain-containing nogo receptor-interacting protein 1	Lingo1	tr|A9DA50|A9DA50_MOUSE Leucine-rich repeat and immunoglobulin-like domain-containing nogo receptor-interacting protein 1 OS=Mus musculus GN=Lingo1 PE=2 SV=1;sp|Q9D1T0|LIGO1_MOUSE Leucine-rich repeat and immunoglobulin-like domain-containing nogo receptor-i	5069600	20662000	17309000	1388400	163530	666530	558350	0	41046000	33402000	2	2	2	4.8	4.8	4.8	69.831	0.0041488	1.7896	43041000	3	1	1	1	1	1	1	1	1	1	1	1	1
427	A9UGK3;Q6VN19	A9UGK3;Q6VN19	Ran-binding protein 10	Ranbp10	tr|A9UGK3|A9UGK3_MOUSE RAN binding protein 10 OS=Mus musculus GN=Ranbp10 PE=2 SV=1;sp|Q6VN19|RBP10_MOUSE Ran-binding protein 10 OS=Mus musculus GN=Ranbp10 PE=1 SV=2	257490000	110290000	177530000	22721000	10729000	4595500	7397200	305200000	260680000	314760000	6	5	5	13.4	10.6	10.6	67.188	0	18.857	545310000	14	5	5	5	4	4	4	4	4	4	4	5	5
428	Q3UIV8;A9YZW8;B0QZV7;Q99MK9-2;Q99MK9	Q3UIV8;A9YZW8;B0QZV7;Q99MK9-2;Q99MK9	Ras association domain-containing protein 1	Rassf1	tr|Q3UIV8|Q3UIV8_MOUSE Ras association domain-containing protein 1 OS=Mus musculus GN=Rassf1 PE=2 SV=1;tr|A9YZW8|A9YZW8_MOUSE RASSF1A tumor suppressor OS=Mus musculus GN=Rassf1 PE=2 SV=1;tr|B0QZV7|B0QZV7_MOUSE Ras association domain-containing protein 1 OS	8341700	8482700	0	934690	463430	471260	0	8341700	8852400	0	1	1	1	3.6	3.6	3.6	25.7	0.0035945	1.8442	16824000	2	1	1	0	1	1	0	1	1	0	1	1	0
429	B0FTY3;Q8R1N4;Q8R1N4-3;Q8R1N4-2;B1AS63;Q8R1N4-4	B0FTY3;Q8R1N4;Q8R1N4-3;Q8R1N4-2	NudC domain-containing protein 3	Nudcd3	tr|B0FTY3|B0FTY3_MOUSE NudC domain containing 3, isoform CRA_a OS=Mus musculus GN=Nudcd3 PE=2 SV=1;sp|Q8R1N4|NUDC3_MOUSE NudC domain-containing protein 3 OS=Mus musculus GN=Nudcd3 PE=2 SV=3;sp|Q8R1N4-3|NUDC3_MOUSE Isoform 3 of NudC domain-containing protei	301100000	266040000	229040000	33174000	12546000	11085000	9543400	472510000	457770000	542930000	7	7	7	25.9	25.9	25.9	40.89	0	28.248	796180000	17	5	5	5	5	5	5	5	5	5	6	6	5
430	B0LAA9	B0LAA9	Phosphoglycerate kinase	Pgk1	tr|B0LAA9|B0LAA9_MOUSE Phosphoglycerate kinase (Fragment) OS=Mus musculus GN=Pgk1 PE=2 SV=1	107180000	82635000	40752000	32938000	15311000	11805000	5821700	284020000	201700000	46656000	7	1	1	71.1	26.3	26.3	8.484	1	-2	230560000	2	7	7	7	1	1	1	1	1	1	1	1	0
431	B0LAB2;Q9CQ82-2;Q9CQ82	B0LAB2;Q9CQ82-2;Q9CQ82	Centromere protein R	Itgb3bp	tr|B0LAB2|B0LAB2_MOUSE Integrin beta 3 binding protein (Fragment) OS=Mus musculus GN=Itgb3bp PE=2 SV=1;sp|Q9CQ82-2|CENPR_MOUSE Isoform 2 of Centromere protein R OS=Mus musculus GN=Itgb3bp;sp|Q9CQ82|CENPR_MOUSE Centromere protein R OS=Mus musculus GN=Itgb3b	0	0	0	0	0	0	0	0	0	0	1	1	1	11.2	11.2	11.2	11.92	0.0024656	1.967	0	1	0	1	0	0	1	0	0	1	0	0	1	0
432	B0LAE4;Q3TQE3;Q8C1Y9;Q80ZW9;Q3TIC7;Q9JKW0;Q3UBA1;Q3THR3	B0LAE4;Q3TQE3;Q8C1Y9;Q80ZW9;Q3TIC7;Q9JKW0;Q3UBA1;Q3THR3	ADP-ribosylation factor-like protein 6-interacting protein 1	Arl6ip1	tr|B0LAE4|B0LAE4_MOUSE ADP-ribosylation factor-like 6 interacting protein 1 (Fragment) OS=Mus musculus GN=Arl6ip1 PE=2 SV=1;tr|Q3TQE3|Q3TQE3_MOUSE Putative uncharacterized protein (Fragment) OS=Mus musculus GN=Arl6ip1 PE=2 SV=1;tr|Q8C1Y9|Q8C1Y9_MOUSE Putat	879600000	678100000	727950000	380940000	146600000	113020000	121320000	1311900000	1669600000	1708500000	4	4	4	42.3	42.3	42.3	15.907	0	9.2532	2285600000	16	2	2	3	2	2	3	2	2	3	7	6	3
433	B0QZL1	B0QZL1	Enolase	Eno1	tr|B0QZL1|B0QZL1_MOUSE Enolase (Fragment) OS=Mus musculus GN=Eno1 PE=1 SV=1	9534000	10026000	0	1504600	733380	771200	0	12758000	18574000	0	16	1	1	78.3	6.3	6.3	23.935	1	-2	19560000	1	15	15	15	1	1	0	1	1	0	0	1	0
434	B0QZL2;Q3V455;Q3V449;Q9EPA7	B0QZL2;Q3V455;Q3V449;Q9EPA7	Nicotinamide-nucleotide adenylyltransferase;Nicotinamide/nicotinic acid mononucleotide adenylyltransferase 1	Nmnat1	tr|B0QZL2|B0QZL2_MOUSE Nicotinamide mononucleotide adenylyltransferase 1 OS=Mus musculus GN=Nmnat1 PE=4 SV=1;tr|Q3V455|Q3V455_MOUSE Putative uncharacterized protein OS=Mus musculus PE=2 SV=1;tr|Q3V449|Q3V449_MOUSE Nicotinamide nucleotide adenylyltransferas	52268000	47064000	51177000	15051000	5226800	4706400	5117700	90260000	103820000	130950000	1	1	1	13.4	13.4	13.4	16.857	0.003593	1.8407	150510000	3	1	1	1	1	1	1	1	1	1	1	1	1
435	Q8CHR4;O35619;B0QZN5;P63044	Q8CHR4;O35619;B0QZN5;P63044	Vesicle-associated membrane protein 2	Vamp2	tr|Q8CHR4|Q8CHR4_MOUSE Vesicle-associated membrane protein 2 OS=Mus musculus GN=Vamp2 PE=2 SV=2;tr|O35619|O35619_MOUSE Vesicle associated membrane protein 2 OS=Mus musculus GN=Vamp2 PE=2 SV=1;tr|B0QZN5|B0QZN5_MOUSE Vesicle-associated membrane protein 2 OS=	340740000	298450000	274480000	182730000	68147000	59690000	54897000	357940000	429590000	443990000	5	2	2	59.5	38.8	38.8	12.691	0	43.616	913670000	8	4	5	4	2	2	2	2	2	2	3	2	3
436	H3BJY1;H3BJ78;H3BKF4;H3BIZ8;B0QZP8;O55101	H3BJY1;H3BJ78;H3BKF4;H3BIZ8;B0QZP8;O55101	Synaptogyrin-2	Syngr2;Gm20708	tr|H3BJY1|H3BJY1_MOUSE Synaptogyrin-2 OS=Mus musculus GN=Syngr2 PE=4 SV=1;tr|H3BJ78|H3BJ78_MOUSE Synaptogyrin-2 (Fragment) OS=Mus musculus GN=Syngr2 PE=4 SV=1;tr|H3BKF4|H3BKF4_MOUSE Protein Gm20708 OS=Mus musculus GN=Gm20708 PE=4 SV=1;tr|H3BIZ8|H3BIZ8_MOUS	161220000	111810000	115350000	129460000	53741000	37270000	38449000	386200000	334420000	416630000	1	1	1	21.7	21.7	21.7	4.6893	0.0042869	1.7716	388380000	4	1	1	1	1	1	1	1	1	1	1	2	1
437	Q9QXM2;Q9QXM4;F2Z488;G5E8H1;C9K0Z0;C9K0Y5;B0QZW1;G5E863;C9K0Y7;Q6P9M2;Q7TNB5;C9K0Y4;P23819;P23819-4;P23819-3	Q9QXM2;Q9QXM4;F2Z488;G5E8H1;C9K0Z0;C9K0Y5;B0QZW1;G5E863;C9K0Y7;Q6P9M2;Q7TNB5;C9K0Y4;P23819;P23819-4;P23819-3	Glutamate receptor 2	Gria3;Gria2;Gria4;Gria1	tr|Q9QXM2|Q9QXM2_MOUSE Glutamate receptor C (Fragment) OS=Mus musculus PE=4 SV=1;tr|Q9QXM4|Q9QXM4_MOUSE Glutamate receptor B (Fragment) OS=Mus musculus PE=4 SV=1;tr|F2Z488|F2Z488_MOUSE Glutamate receptor 3 OS=Mus musculus GN=Gria3 PE=4 SV=1;tr|G5E8H1|G5E8H	0	366240000	0	91560000	0	91560000	0	0	382200000	0	1	1	1	19.6	19.6	19.6	4.8015	0.0047009	1.7347	366240000	3	1	1	1	1	1	1	1	1	1	1	1	1
438	Q8BWQ2;Q8BVY4;B0QZW4;Q8BU36;B0QZW5	Q8BWQ2;Q8BVY4;B0QZW4;Q8BU36;B0QZW5		Supt3	tr|Q8BWQ2|Q8BWQ2_MOUSE Putative uncharacterized protein OS=Mus musculus GN=Supt3 PE=2 SV=1;tr|Q8BVY4|Q8BVY4_MOUSE Protein Supt3 OS=Mus musculus GN=Supt3 PE=1 SV=1;tr|B0QZW4|B0QZW4_MOUSE Protein Supt3 (Fragment) OS=Mus musculus GN=Supt3 PE=1 SV=1;tr|Q8BU36|	34250000	3587500	7644700	2675400	2014700	211030	449690	27427000	25889000	18837000	4	4	4	20.3	20.3	20.3	41.217	0	14.793	45482000	3	4	2	1	4	2	1	4	2	1	2	0	1
439	B0R077;Q8CG95;B1AXS6;B1AXS8;B1AXS7;B1AXS5;Q9JLM4	B0R077;Q8CG95;B1AXS6;B1AXS8;B1AXS7;B1AXS5;Q9JLM4	Zinc finger MYM-type protein 3	Zmym3	tr|B0R077|B0R077_MOUSE Zinc finger MYM-type protein 3 OS=Mus musculus GN=Zmym3 PE=4 SV=1;tr|Q8CG95|Q8CG95_MOUSE Zinc finger MYM-type protein 3 OS=Mus musculus GN=Zmym3 PE=2 SV=1;tr|B1AXS6|B1AXS6_MOUSE Zinc finger MYM-type protein 3 OS=Mus musculus GN=Zmym3	69822000	22684000	29145000	6402600	3674800	1193900	1533900	97637000	81960000	63130000	2	2	2	5.5	5.5	5.5	52.901	0	5.3532	121650000	4	2	1	1	2	1	1	2	1	1	2	1	1
440	B0R081;Q3TFW3;Q3T9Q9;Q0P648;Q9D9I4	B0R081;Q3TFW3;Q3T9Q9;Q0P648;Q9D9I4	TBC1 domain family member 20	Tbc1d20	tr|B0R081|B0R081_MOUSE TBC1 domain family member 20 (Fragment) OS=Mus musculus GN=Tbc1d20 PE=4 SV=1;tr|Q3TFW3|Q3TFW3_MOUSE Putative uncharacterized protein OS=Mus musculus GN=Tbc1d20 PE=2 SV=1;tr|Q3T9Q9|Q3T9Q9_MOUSE Putative uncharacterized protein OS=Mus	30649000	27890000	26443000	7725600	2786300	2535500	2403900	56552000	54674000	72950000	1	1	1	9	9	9	18.078	0	3.2576	84982000	3	1	1	1	1	1	1	1	1	1	1	1	1
441	B0R091;P61022;B0R092	B0R091;P61022	Calcineurin B homologous protein 1	Chp1	tr|B0R091|B0R091_MOUSE Calcineurin B homologous protein 1 OS=Mus musculus GN=Chp1 PE=4 SV=1;sp|P61022|CHP1_MOUSE Calcineurin B homologous protein 1 OS=Mus musculus GN=Chp1 PE=1 SV=2	256710000	425930000	314510000	62322000	16044000	26621000	19657000	627610000	617380000	543850000	6	6	6	39.3	39.3	39.3	21.997	0	27.917	997150000	16	3	5	4	3	5	4	3	5	4	4	6	6
442	B0R0Y8	B0R0Y8		Sh3kbp1	tr|B0R0Y8|B0R0Y8_MOUSE SH3 domain-containing kinase-binding protein 1 (Fragment) OS=Mus musculus GN=Sh3kbp1 PE=4 SV=1	19447000	0	47892000	5611600	1620600	0	3991000	52378000	0	84071000	9	1	1	51.7	6.7	6.7	22.409	0.0011928	2.3692	67339000	2	7	4	8	1	0	1	1	0	1	1	0	1
443	B0V2N1-4;B0V2N1-3;B0V2N1-6;B0V2N1-2;B0V2N1;Q3UNN3;B0V2N1-5;Q3TP78;Q63847;Q8C922	B0V2N1-4;B0V2N1-3;B0V2N1-6;B0V2N1-2;B0V2N1;Q3UNN3;B0V2N1-5;Q3TP78	Receptor-type tyrosine-protein phosphatase S	Ptprs	sp|B0V2N1-4|PTPRS_MOUSE Isoform 4 of Receptor-type tyrosine-protein phosphatase S OS=Mus musculus GN=Ptprs;sp|B0V2N1-3|PTPRS_MOUSE Isoform 3 of Receptor-type tyrosine-protein phosphatase S OS=Mus musculus GN=Ptprs;sp|B0V2N1-6|PTPRS_MOUSE Isoform 6 of Recep	64881000	35752000	54379000	2013200	842610	464310	706220	107510000	85402000	83240000	6	6	4	6.1	6.1	4.5	167.87	0	7.4896	155010000	10	4	3	2	4	3	2	2	1	1	6	2	2
444	B0V2Q7;Q3UN02	B0V2Q7;Q3UN02	Lysocardiolipin acyltransferase 1	Lclat1	tr|B0V2Q7|B0V2Q7_MOUSE Lclat1 protein OS=Mus musculus GN=Lclat1 PE=2 SV=1;sp|Q3UN02|LCLT1_MOUSE Lysocardiolipin acyltransferase 1 OS=Mus musculus GN=Lclat1 PE=2 SV=2	897830000	464030000	458160000	95791000	47254000	24423000	24114000	1132100000	1241000000	1257000000	7	7	7	23.1	23.1	23.1	44.399	0	22.704	1820000000	42	6	4	7	6	4	7	6	4	7	15	13	14
445	B1APX2;Q3UE31;Q69ZV3	B1APX2;Q3UE31;Q69ZV3	Uncharacterized protein KIAA0930 homolog	5031439G07Rik;mKIAA0930	tr|B1APX2|B1APX2_MOUSE Protein 5031439G07Rik OS=Mus musculus GN=5031439G07Rik PE=1 SV=1;sp|Q3UE31|K0930_MOUSE Uncharacterized protein KIAA0930 homolog OS=Mus musculus PE=1 SV=2;tr|Q69ZV3|Q69ZV3_MOUSE MKIAA0930 protein (Fragment) OS=Mus musculus GN=mKIAA093	56986000	94123000	0	5210700	1965000	3245600	0	158070000	137290000	0	2	2	2	4.7	4.7	4.7	50.235	0	4.3174	151110000	4	1	2	1	1	2	1	1	2	1	1	2	1
446	Q3V299;B1AQD9;Q9Z2R6	Q3V299;B1AQD9;Q9Z2R6	Protein unc-119 homolog A	Unc119	tr|Q3V299|Q3V299_MOUSE Unc-119 homolog (C. elegans), isoform CRA_a OS=Mus musculus GN=Unc119 PE=2 SV=1;tr|B1AQD9|B1AQD9_MOUSE Protein unc-119 homolog A OS=Mus musculus GN=Unc119 PE=1 SV=1;sp|Q9Z2R6|U119A_MOUSE Protein unc-119 homolog A OS=Mus musculus GN=U	37740000	52015000	34762000	7324500	2220000	3059700	2044800	59492000	77002000	66438000	1	1	1	5.4	5.4	5.4	27.01	0.0010485	2.4232	124520000	4	1	1	1	1	1	1	1	1	1	1	1	2
447	B1AQF4;Q9D7X3;Q3V2Y9;H3BKL8;H3BKD1	B1AQF4;Q9D7X3;Q3V2Y9;H3BKL8;H3BKD1	Dual specificity protein phosphatase 3	Dusp3	tr|B1AQF4|B1AQF4_MOUSE Dual-specificity protein phosphatase 3 OS=Mus musculus GN=Dusp3 PE=4 SV=1;sp|Q9D7X3|DUS3_MOUSE Dual specificity protein phosphatase 3 OS=Mus musculus GN=Dusp3 PE=1 SV=1;tr|Q3V2Y9|Q3V2Y9_MOUSE Dual-specificity protein phosphatase 3 OS	601080000	770900000	837080000	200820000	54643000	70082000	76098000	1266500000	1396100000	1716000000	8	8	8	51.4	51.4	51.4	23.223	0	61.673	2209100000	27	6	6	5	6	6	5	6	6	5	6	9	12
448	B1AQJ2;B0QZF8	B1AQJ2;B0QZF8	Ubiquitin carboxyl-terminal hydrolase 36	Usp36	sp|B1AQJ2|UBP36_MOUSE Ubiquitin carboxyl-terminal hydrolase 36 OS=Mus musculus GN=Usp36 PE=2 SV=1;tr|B0QZF8|B0QZF8_MOUSE Ubiquitin carboxyl-terminal hydrolase 36 (Fragment) OS=Mus musculus GN=Usp36 PE=4 SV=1	113520000	201160000	134470000	6805300	1720100	3047800	2037400	276590000	336560000	268830000	10	10	10	11.4	11.4	11.4	119.91	0	8.2359	449150000	21	5	4	6	5	4	6	5	4	6	7	6	8
449	B1AQY9;B1AQZ0;Q8CHH9;Q8CHH9-2;B7ZC46;E0CYM4	B1AQY9;B1AQZ0;Q8CHH9;Q8CHH9-2;B7ZC46	Septin-8	2008-09-01	tr|B1AQY9|B1AQY9_MOUSE Septin-8 OS=Mus musculus GN=Sept8 PE=1 SV=1;tr|B1AQZ0|B1AQZ0_MOUSE Septin-8 OS=Mus musculus GN=Sept8 PE=1 SV=1;sp|Q8CHH9|SEPT8_MOUSE Septin-8 OS=Mus musculus GN=Sept8 PE=1 SV=4;sp|Q8CHH9-2|SEPT8_MOUSE Isoform 2 of Septin-8 OS=Mus mus	4580400000	2905000000	3336800000	432890000	183220000	116200000	133470000	6741800000	5386400000	5968800000	22	18	18	59.3	50.2	50.2	51.145	0	204.32	10822000000	90	20	18	18	16	15	15	16	15	15	32	30	28
450	Q3TET1;Q3UI47;B1AQZ2;P28741;B1AQZ5;Q80UK1;Q3TSP1;Q3TTS7;Q8CGJ1;F6V6Z9	Q3TET1;Q3UI47;B1AQZ2;P28741	Kinesin-like protein;Kinesin-like protein KIF3A	Kif3a	tr|Q3TET1|Q3TET1_MOUSE Kinesin-like protein KIF3A OS=Mus musculus GN=Kif3a PE=1 SV=1;tr|Q3UI47|Q3UI47_MOUSE Kinesin family member 3A, isoform CRA_b OS=Mus musculus GN=Kif3a PE=1 SV=1;tr|B1AQZ2|B1AQZ2_MOUSE Kinesin-like protein KIF3A OS=Mus musculus GN=Kif3	333400000	473520000	307770000	25923000	7753500	11012000	7157500	512770000	477830000	504540000	11	10	10	15.7	14.1	14.1	79.444	0	16.226	1114700000	20	7	8	7	6	7	6	6	7	6	6	7	7
451	Z4YKM2;B2RWE3;B3DFI8;B1AR13	Z4YKM2;B2RWE3;B3DFI8;B1AR13	CDGSH iron-sulfur domain-containing protein 3, mitochondrial	Cisd3	tr|Z4YKM2|Z4YKM2_MOUSE CDGSH iron-sulfur domain-containing protein 3, mitochondrial OS=Mus musculus GN=Cisd3 PE=1 SV=1;tr|B2RWE3|B2RWE3_MOUSE CDGSH iron sulfur domain 3 OS=Mus musculus GN=Cisd3 PE=1 SV=1;tr|B3DFI8|B3DFI8_MOUSE Cisd3 protein (Fragment) OS=M	279420000	276800000	172280000	66228000	25402000	25164000	15662000	412880000	338430000	347140000	5	5	5	35.7	35.7	35.7	13.155	0	5.8254	728510000	14	3	3	5	3	3	5	3	3	5	3	5	6
452	E9Q614;B1AR17;F7C528;F6V4V3;Q8BR71;O35327;E0CYH9	E9Q614;B1AR17;F7C528		Chd3	tr|E9Q614|E9Q614_MOUSE Protein Chd3 OS=Mus musculus GN=Chd3 PE=4 SV=1;tr|B1AR17|B1AR17_MOUSE Protein Chd3 OS=Mus musculus GN=Chd3 PE=4 SV=1;tr|F7C528|F7C528_MOUSE Protein Chd3 (Fragment) OS=Mus musculus GN=Chd3 PE=4 SV=1	87496000	60034000	66122000	2074300	849480	582850	641970	127800000	89416000	166610000	23	8	5	13.2	6	3.6	228.97	0.00030497	2.6557	213650000	12	15	14	15	4	4	3	2	2	3	5	4	3
453	B1AR31;Q6XVF4;Q6XVF5;Q6XVF6;J3KMS4;E9PXG2;E9Q3Z8;F6TPQ6	B1AR31;Q6XVF4;Q6XVF5;Q6XVF6		Dlg4	tr|B1AR31|B1AR31_MOUSE Disks large homolog 4 (Fragment) OS=Mus musculus GN=Dlg4 PE=1 SV=1;tr|Q6XVF4|Q6XVF4_MOUSE PSD-95 alpha (Fragment) OS=Mus musculus PE=4 SV=1;tr|Q6XVF5|Q6XVF5_MOUSE PSD-95 alpha 2b (Fragment) OS=Mus musculus PE=4 SV=1;tr|Q6XVF6|Q6XVF6_	0	0	0	0	0	0	0	0	0	0	3	1	1	19.4	4.4	4.4	26.559	1	-2	0	0	1	2	3	0	0	1	0	0	1	0	0	0
454	B1AR50;Q9DCD6;Q8R3R8	B1AR50;Q9DCD6;Q8R3R8	Gamma-aminobutyric acid receptor-associated protein;Gamma-aminobutyric acid receptor-associated protein-like 1	Gabarap;Gabarapl1	tr|B1AR50|B1AR50_MOUSE Gamma-aminobutyric acid receptor-associated protein OS=Mus musculus GN=Gabarap PE=3 SV=1;sp|Q9DCD6|GBRAP_MOUSE Gamma-aminobutyric acid receptor-associated protein OS=Mus musculus GN=Gabarap PE=1 SV=2;sp|Q8R3R8|GBRL1_MOUSE Gamma-amino	324440000	437170000	477080000	154840000	40555000	54646000	59635000	496870000	494780000	430970000	4	2	2	21.7	21.7	21.7	12.195	0	3.3607	1238700000	11	3	2	4	1	1	2	1	1	2	2	4	5
455	Q0VF62;B1AR74;Q8CCN5;Q3TAC0;Q8CCN5-2;F7C0F2;B1AR76;F7CPM1;Q5SWI1;B1B0B3	Q0VF62;B1AR74;Q8CCN5;Q3TAC0;Q8CCN5-2;F7C0F2	Breast carcinoma-amplified sequence 3 homolog	Bcas3	tr|Q0VF62|Q0VF62_MOUSE Bcas3 protein OS=Mus musculus GN=Bcas3 PE=1 SV=1;tr|B1AR74|B1AR74_MOUSE Breast carcinoma-amplified sequence 3 homolog OS=Mus musculus GN=Bcas3 PE=1 SV=1;sp|Q8CCN5|BCAS3_MOUSE Breast carcinoma-amplified sequence 3 homolog OS=Mus muscu	745690000	308880000	356980000	32827000	17342000	7183200	8301800	819470000	721510000	836680000	13	13	13	20.8	20.8	20.8	99.464	0	37.914	1411500000	27	12	7	9	12	7	9	12	7	9	11	8	8
456	Q80VZ9;B1AR92;Q3UUJ4-2;Q3UUJ4-3;Q3UUJ4	Q80VZ9;B1AR92;Q3UUJ4-2;Q3UUJ4-3;Q3UUJ4	STE20-related kinase adapter protein alpha	Strada	tr|Q80VZ9|Q80VZ9_MOUSE 2610019A05Rik protein OS=Mus musculus GN=Strada PE=2 SV=1;tr|B1AR92|B1AR92_MOUSE STE20-related kinase adapter protein alpha (Fragment) OS=Mus musculus GN=Strada PE=4 SV=2;sp|Q3UUJ4-2|STRAA_MOUSE Isoform 2 of STE20-related kinase adap	16520000	0	0	2753300	2753300	0	0	22106000	0	0	1	1	1	21.6	21.6	21.6	11.502	0	3.4035	16520000	1	1	0	0	1	0	0	1	0	0	1	0	0
457	B1ARA3;Q4FZH2;P61255;Q3U7N1;B1ARA5;B2RX86;F7CGP0;A3KGS3-2;A3KGS3	B1ARA3;Q4FZH2;P61255;Q3U7N1;B1ARA5	60S ribosomal protein L26	Rpl26	tr|B1ARA3|B1ARA3_MOUSE 60S ribosomal protein L26 (Fragment) OS=Mus musculus GN=Rpl26 PE=4 SV=1;tr|Q4FZH2|Q4FZH2_MOUSE MCG50660, isoform CRA_a OS=Mus musculus GN=Rpl26 PE=2 SV=1;sp|P61255|RL26_MOUSE 60S ribosomal protein L26 OS=Mus musculus GN=Rpl26 PE=1 SV	8489100000	7618100000	8978500000	3135700000	1061100000	952260000	1122300000	12606000000	10156000000	11170000000	10	10	10	62.1	62.1	62.1	12.217	0	32.002	25086000000	204	6	9	8	6	9	8	6	9	8	68	71	65
458	B1ARC2;Q8BWY7-3;Q8BWY7;Q8BWY7-2;B1ARC5	B1ARC2;Q8BWY7-3;Q8BWY7;Q8BWY7-2;B1ARC5	Zinc transporter ZIP11	Slc39a11	tr|B1ARC2|B1ARC2_MOUSE Zinc transporter ZIP11 (Fragment) OS=Mus musculus GN=Slc39a11 PE=4 SV=1;sp|Q8BWY7-3|S39AB_MOUSE Isoform 3 of Zinc transporter ZIP11 OS=Mus musculus GN=Slc39a11;sp|Q8BWY7|S39AB_MOUSE Zinc transporter ZIP11 OS=Mus musculus GN=Slc39a11	30741000	30453000	161690000	55721000	7685100	7613300	40423000	112950000	157060000	183050000	2	2	2	22	22	22	21.025	0	12.301	222880000	4	1	1	2	1	1	2	1	1	2	1	1	2
459	Q7TME9;B1ARD6;Q8CB82;Q80VG8;Q7TME8;Q8C7F7;Q7TMF0;Q3UBN9;Q7TMF1;B1ARD8;Q8R3R7;F6RTS1;E9Q0R4	Q7TME9;B1ARD6;Q8CB82;Q80VG8;Q7TME8;Q8C7F7		Slfn9	tr|Q7TME9|Q7TME9_MOUSE Schlafen 9 OS=Mus musculus GN=Slfn9 PE=2 SV=1;tr|B1ARD6|B1ARD6_MOUSE Protein Slfn9 OS=Mus musculus GN=Slfn9 PE=4 SV=1;tr|Q8CB82|Q8CB82_MOUSE Putative uncharacterized protein OS=Mus musculus GN=Slfn9 PE=2 SV=1;tr|Q80VG8|Q80VG8_MOUSE P	2467100000	2003800000	2483800000	119910000	42536000	34548000	42824000	3756200000	4272500000	4185700000	31	31	31	41.6	41.6	41.6	103.94	0	88.022	6954600000	105	25	23	25	25	23	25	25	23	25	34	35	36
460	B1ARM8;Q8CJ27;Q4G1G9	B1ARM8;Q8CJ27;Q4G1G9	Abnormal spindle-like microcephaly-associated protein homolog	Aspm	tr|B1ARM8|B1ARM8_MOUSE Abnormal spindle-like microcephaly-associated protein homolog OS=Mus musculus GN=Aspm PE=4 SV=1;sp|Q8CJ27|ASPM_MOUSE Abnormal spindle-like microcephaly-associated protein homolog OS=Mus musculus GN=Aspm PE=2 SV=2;tr|Q4G1G9|Q4G1G9_MOU	112160000	52267000	54139000	2005200	1029000	479520	496690	158240000	112210000	119590000	10	10	10	7.6	7.6	7.6	212.05	0	11.864	218570000	15	7	4	4	7	4	4	7	4	4	7	4	4
461	B1ART1;B1ART2;V9GX23;F6XI52;Q6A066	B1ART1;B1ART2;V9GX23		Vps13d	tr|B1ART1|B1ART1_MOUSE Protein Vps13d OS=Mus musculus GN=Vps13d PE=1 SV=1;tr|B1ART2|B1ART2_MOUSE Protein Vps13d OS=Mus musculus GN=Vps13d PE=1 SV=2;tr|V9GX23|V9GX23_MOUSE Protein Vps13d (Fragment) OS=Mus musculus GN=Vps13d PE=1 SV=1	55150000	0	7685900	242610	212930	0	29675	80165000	0	0	5	5	5	1.5	1.5	1.5	487.32	0.00015444	2.8554	62836000	4	4	0	1	4	0	1	4	0	1	3	0	1
462	B1ARU4;E9PVY8;E9QNP1;Q5DTZ2;F6SHS0;Q8C8N4;Q80ZZ3;F6YKN8;F6RL59;Q9CYG3;Q3V3W8;Q8C221	B1ARU4;E9PVY8;E9QNP1		Macf1	tr|B1ARU4|B1ARU4_MOUSE Microtubule-actin cross-linking factor 1 OS=Mus musculus GN=Macf1 PE=1 SV=1;tr|E9PVY8|E9PVY8_MOUSE Microtubule-actin cross-linking factor 1 OS=Mus musculus GN=Macf1 PE=1 SV=2;tr|E9QNP1|E9QNP1_MOUSE Microtubule-actin cross-linking fac	6782200000	6391800000	5342200000	39064000	14308000	13485000	11270000	9262900000	9231800000	8752200000	152	151	0	29.2	29.1	0	831.64	0	323.31	18516000000	362	104	113	103	103	112	102	0	0	0	129	118	115
463	B1ARW4;Q99LY9	B1ARW4;Q99LY9	NADH dehydrogenase [ubiquinone] iron-sulfur protein 5;NADH dehydrogenase [ubiquinone] iron-sulfur protein 5, N-terminally processed	Ndufs5	tr|B1ARW4|B1ARW4_MOUSE NADH dehydrogenase [ubiquinone] iron-sulfur protein 5 (Fragment) OS=Mus musculus GN=Ndufs5 PE=4 SV=1;sp|Q99LY9|NDUS5_MOUSE NADH dehydrogenase [ubiquinone] iron-sulfur protein 5 OS=Mus musculus GN=Ndufs5 PE=1 SV=3	53867000	44357000	0	16371000	8977800	7392800	0	0	46290000	0	2	2	2	20.9	20.9	20.9	10.909	0.0051136	1.6849	98223000	1	1	1	1	1	1	1	1	1	1	0	0	1
464	B1AS37;Q9D032-2;Q9D032;Q8R051;B1AS34;Q8BYA8;Q8BMY2;Q3U5B9	B1AS37;Q9D032-2;Q9D032;Q8R051;B1AS34;Q8BYA8;Q8BMY2;Q3U5B9	Single-stranded DNA-binding protein 3	Ssbp3	tr|B1AS37|B1AS37_MOUSE Single-stranded DNA-binding protein 3 OS=Mus musculus GN=Ssbp3 PE=1 SV=1;sp|Q9D032-2|SSBP3_MOUSE Isoform 2 of Single-stranded DNA-binding protein 3 OS=Mus musculus GN=Ssbp3;sp|Q9D032|SSBP3_MOUSE Single-stranded DNA-binding protein 3	72513000	0	49624000	12214000	7251300	0	4962400	133070000	0	100560000	2	1	1	7.3	4.6	4.6	38.209	0.0061789	1.5302	122140000	4	2	1	2	1	0	1	1	0	1	2	0	2
465	B1AS67;Q66T02-2;Q66T02	B1AS67;Q66T02-2;Q66T02	Pleckstrin homology domain-containing family G member 5	Plekhg5	tr|B1AS67|B1AS67_MOUSE Pleckstrin homology domain-containing family G member 5 OS=Mus musculus GN=Plekhg5 PE=1 SV=1;sp|Q66T02-2|PKHG5_MOUSE Isoform 2 of Pleckstrin homology domain-containing family G member 5 OS=Mus musculus GN=Plekhg5;sp|Q66T02|PKHG5_MOUS	81896000	71852000	103180000	4507400	1436800	1260600	1810100	192890000	151600000	158900000	4	4	4	4.9	4.9	4.9	117.84	0	8.5199	256920000	10	3	3	4	3	3	4	3	3	4	3	3	4
466	E9QA68;B1ASA5	E9QA68;B1ASA5		Zfp362	tr|E9QA68|E9QA68_MOUSE Protein Zfp362 (Fragment) OS=Mus musculus GN=Zfp362 PE=4 SV=1;tr|B1ASA5|B1ASA5_MOUSE Protein Zfp362 OS=Mus musculus GN=Zfp362 PE=2 SV=1	47118000	33990000	57714000	6310100	2141700	1545000	2623400	136800000	110930000	112370000	4	4	3	21.3	21.3	18.5	39.998	0	5.7106	138820000	10	2	1	4	2	1	4	2	1	3	2	2	6
467	Q3URA1;B7ZN32;B1ASD1;P17012;P23607;H6U8U5	Q3URA1;B7ZN32;B1ASD1;P17012;P23607	Zinc finger X-chromosomal protein;Zinc finger autosomal protein	Zfx;Zfa	tr|Q3URA1|Q3URA1_MOUSE Putative uncharacterized protein (Fragment) OS=Mus musculus GN=Zfx PE=2 SV=1;tr|B7ZN32|B7ZN32_MOUSE Zfx protein OS=Mus musculus GN=Zfx PE=2 SV=1;tr|B1ASD1|B1ASD1_MOUSE Zinc finger protein X-linked OS=Mus musculus GN=Zfx PE=2 SV=1;sp|	28436000	45343000	9220000	3320000	1137500	1813700	368800	51948000	59461000	0	3	3	3	10.7	10.7	10.7	42.925	0.00015396	2.8117	82999000	5	1	2	2	1	2	2	1	2	2	1	2	2
468	B1ASK8;Q6P073;B0QZM2;B0QZM1	B1ASK8;Q6P073;B0QZM2;B0QZM1	Ubiquitin-conjugating enzyme E2 J2	Ube2j2	tr|B1ASK8|B1ASK8_MOUSE Ubiquitin-conjugating enzyme E2 J2 OS=Mus musculus GN=Ube2j2 PE=4 SV=1;sp|Q6P073|UB2J2_MOUSE Ubiquitin-conjugating enzyme E2 J2 OS=Mus musculus GN=Ube2j2 PE=1 SV=1;tr|B0QZM2|B0QZM2_MOUSE Ubiquitin-conjugating enzyme E2 J2 (Fragment)	168330000	28919000	110180000	23649000	12949000	2224500	8475400	212500000	58224000	114590000	2	2	2	15.1	15.1	15.1	30.292	0	5.3308	307430000	8	2	1	2	2	1	2	2	1	2	4	1	3
469	Q3URU8;B1ASP2;P52332;Q3U8P8;Q8K0I7;Q3UZ30;Q8CFX4;Q3TI10	Q3URU8;B1ASP2;P52332;Q3U8P8;Q8K0I7	Tyrosine-protein kinase;Tyrosine-protein kinase JAK1	Jak1	tr|Q3URU8|Q3URU8_MOUSE Tyrosine-protein kinase OS=Mus musculus GN=Jak1 PE=2 SV=1;tr|B1ASP2|B1ASP2_MOUSE Tyrosine-protein kinase OS=Mus musculus GN=Jak1 PE=3 SV=1;sp|P52332|JAK1_MOUSE Tyrosine-protein kinase JAK1 OS=Mus musculus GN=Jak1 PE=1 SV=1;tr|Q3U8P8|	271200000	190440000	137850000	8326100	3766700	2644900	1914500	351420000	297730000	293880000	15	15	15	19.3	19.3	19.3	133.29	0	22.217	599480000	24	9	5	8	9	5	8	9	5	8	11	5	8
470	Q9D186;Q3KNM9;B1ASQ2;Q9DCZ4	Q9D186;Q3KNM9;B1ASQ2;Q9DCZ4	Apolipoprotein O	Apoo	tr|Q9D186|Q9D186_MOUSE Apolipoprotein O OS=Mus musculus GN=Apoo PE=2 SV=1;tr|Q3KNM9|Q3KNM9_MOUSE Apoo protein OS=Mus musculus GN=Apoo PE=2 SV=1;tr|B1ASQ2|B1ASQ2_MOUSE Apolipoprotein O OS=Mus musculus GN=Apoo PE=4 SV=1;sp|Q9DCZ4|APOO_MOUSE Apolipoprotein O	558960000	732700000	1042700000	233440000	55896000	73270000	104270000	1006100000	1111600000	1504600000	6	6	6	47.6	47.6	47.6	18.798	0	18.327	2334400000	20	4	4	5	4	4	5	4	4	5	4	7	9
471	B1AST8;B1AST7;E9QLW6;E9Q1Q1;Q60592;Q3URY8;E9Q6Q5;Q9R1L5;Q9DBV8	B1AST8;B1AST7;E9QLW6;E9Q1Q1;Q60592;Q3URY8;E9Q6Q5;Q9R1L5	Microtubule-associated serine/threonine-protein kinase 2;Microtubule-associated serine/threonine-protein kinase 1	Mast2;Mast1	tr|B1AST8|B1AST8_MOUSE Microtubule associated serine/threonine kinase 2, isoform CRA_b OS=Mus musculus GN=Mast2 PE=1 SV=1;tr|B1AST7|B1AST7_MOUSE Microtubule-associated serine/threonine-protein kinase 2 OS=Mus musculus GN=Mast2 PE=1 SV=1;tr|E9QLW6|E9QLW6_MO	39728000	34518000	17577000	936970	405390	352220	179360	65422000	46411000	63326000	7	4	4	5.2	3.2	3.2	190.36	0	5.4626	91824000	7	5	4	5	2	2	3	2	2	3	2	2	3
472	B1ASU9;O55047;O55047-2;O55047-3;B7ZC84;D6RHM1;Q3TTG3;F6XSD0;P70320;B7ZC85;Q6NZC4	B1ASU9;O55047;O55047-2;O55047-3	Serine/threonine-protein kinase tousled-like 2	Tlk2	tr|B1ASU9|B1ASU9_MOUSE Serine/threonine-protein kinase tousled-like 2 OS=Mus musculus GN=Tlk2 PE=4 SV=1;sp|O55047|TLK2_MOUSE Serine/threonine-protein kinase tousled-like 2 OS=Mus musculus GN=Tlk2 PE=1 SV=2;sp|O55047-2|TLK2_MOUSE Isoform 2 of Serine/threoni	283050000	198280000	186280000	15173000	6432900	4506300	4233700	412340000	441550000	469090000	6	6	5	13.3	13.3	10.7	85.341	0	9.8964	667610000	14	6	3	4	6	3	4	5	2	3	5	4	5
473	B1AT82;Q9D0M1;Q8BK29;B1AT84;B1AT83	B1AT82;Q9D0M1;Q8BK29	Phosphoribosyl pyrophosphate synthase-associated protein 1	Prpsap1	tr|B1AT82|B1AT82_MOUSE MCG6846, isoform CRA_c OS=Mus musculus GN=Prpsap1 PE=1 SV=1;sp|Q9D0M1|KPRA_MOUSE Phosphoribosyl pyrophosphate synthase-associated protein 1 OS=Mus musculus GN=Prpsap1 PE=1 SV=1;tr|Q8BK29|Q8BK29_MOUSE Putative uncharacterized protein	1352100000	1136300000	1024700000	135120000	52005000	43704000	39413000	2314700000	2015600000	2073700000	10	9	9	39.5	35.8	35.8	42.467	0	51.816	3513200000	40	9	9	10	8	8	9	8	8	9	14	13	13
474	B7ZC94;B1ATC3;Q3UHC0	B7ZC94;B1ATC3;Q3UHC0	Trinucleotide repeat-containing gene 6C protein	Tnrc6c	tr|B7ZC94|B7ZC94_MOUSE Trinucleotide repeat-containing gene 6C protein (Fragment) OS=Mus musculus GN=Tnrc6c PE=1 SV=1;tr|B1ATC3|B1ATC3_MOUSE Trinucleotide repeat-containing gene 6C protein OS=Mus musculus GN=Tnrc6c PE=1 SV=1;sp|Q3UHC0|TNR6C_MOUSE Trinucleo	94468000	30646000	86885000	2826600	1259600	408620	1158500	110360000	117090000	185970000	5	4	4	4.3	3.6	3.6	180.23	0	7.5148	212000000	11	5	4	5	4	3	4	4	3	4	4	3	4
475	Q66I45;B1ATD5;R4GML8;Q8K296;B1ATD4;M0QW74;Q8K296-2;Q8R0N4;Q80U24;Q9CVQ1;Q6PE02;Q91XS1-2;Q91XS1	Q66I45;B1ATD5;R4GML8;Q8K296;B1ATD4;M0QW74;Q8K296-2	Myotubularin-related protein 3	Mtmr3	tr|Q66I45|Q66I45_MOUSE Mtmr3 protein OS=Mus musculus GN=Mtmr3 PE=2 SV=1;tr|B1ATD5|B1ATD5_MOUSE MCG9626, isoform CRA_b OS=Mus musculus GN=Mtmr3 PE=1 SV=1;tr|R4GML8|R4GML8_MOUSE Myotubularin-related protein 3 (Fragment) OS=Mus musculus GN=Mtmr3 PE=1 SV=1;sp|	405030000	452550000	316020000	16766000	5786100	6464900	4514600	844830000	777660000	759870000	15	15	15	21.4	21.4	21.4	129.61	0	32.061	1173600000	33	11	11	9	11	11	9	11	11	9	9	13	11
476	Q8C5J1;Q99PH3;Q8C3C9;B1AV77;Q99PH4;B1ATI0;P47740;Q8BQ93;Q3U7B5;REV__Q9DAH1;REV__Q7TT52-2	Q8C5J1;Q99PH3;Q8C3C9;B1AV77;Q99PH4;B1ATI0;P47740;Q8BQ93;Q3U7B5	Aldehyde dehydrogenase;Fatty aldehyde dehydrogenase	Aldh3a2	tr|Q8C5J1|Q8C5J1_MOUSE Aldehyde dehydrogenase OS=Mus musculus PE=2 SV=1;tr|Q99PH3|Q99PH3_MOUSE Aldehyde dehydrogenase OS=Mus musculus GN=Aldh3a2 PE=3 SV=1;tr|Q8C3C9|Q8C3C9_MOUSE Aldehyde dehydrogenase OS=Mus musculus GN=Aldh3a2 PE=2 SV=1;tr|B1AV77|B1AV77_M	1612300000	1753100000	1587900000	260700000	84858000	92271000	83576000	2809400000	2775200000	2806700000	13	11	10	35.4	32.6	31.2	47.682	0	31.965	4953400000	58	10	12	11	8	10	9	7	9	8	16	21	21
477	Q3U8N2;B1ATI9;Q3U432;Q0VBR8;Q60780;Q6A075;Q60780-2	Q3U8N2;B1ATI9;Q3U432;Q0VBR8;Q60780;Q6A075;Q60780-2	Growth arrest-specific protein 7	Gas7	tr|Q3U8N2|Q3U8N2_MOUSE Putative uncharacterized protein (Fragment) OS=Mus musculus GN=Gas7 PE=2 SV=1;tr|B1ATI9|B1ATI9_MOUSE Growth arrest-specific protein 7 OS=Mus musculus GN=Gas7 PE=4 SV=1;tr|Q3U432|Q3U432_MOUSE Growth arrest-specific protein 7 OS=Mus mu	326730000	307970000	274990000	43319000	15559000	14665000	13095000	343930000	353370000	246890000	9	9	9	28.8	28.8	28.8	40.89	0	39.529	909690000	15	6	5	6	6	5	6	6	5	6	5	5	5
478	B1ATP7;Q3U0M8;Q80Y81-2;Q80Y81;B1ATP9	B1ATP7;Q3U0M8;Q80Y81-2;Q80Y81	Zinc phosphodiesterase ELAC protein 2	Elac2	tr|B1ATP7|B1ATP7_MOUSE Zinc phosphodiesterase ELAC protein 2 OS=Mus musculus GN=Elac2 PE=1 SV=1;tr|Q3U0M8|Q3U0M8_MOUSE Putative uncharacterized protein OS=Mus musculus GN=Elac2 PE=2 SV=1;sp|Q80Y81-2|RNZ2_MOUSE Isoform 2 of Zinc phosphodiesterase ELAC prote	1579400000	1678000000	1323300000	91615000	31587000	33561000	26466000	2634100000	2633300000	2329300000	21	21	21	40.7	40.7	40.7	91.946	0	71.008	4580700000	57	15	16	14	15	16	14	15	16	14	17	23	17
479	B1ATS5;Q64518;Q91YM6	B1ATS5;Q64518	Calcium-transporting ATPase;Sarcoplasmic/endoplasmic reticulum calcium ATPase 3	Atp2a3	tr|B1ATS5|B1ATS5_MOUSE Calcium-transporting ATPase OS=Mus musculus GN=Atp2a3 PE=3 SV=1;sp|Q64518|AT2A3_MOUSE Sarcoplasmic/endoplasmic reticulum calcium ATPase 3 OS=Mus musculus GN=Atp2a3 PE=2 SV=3	0	0	0	0	0	0	0	0	0	0	9	1	1	9	1.4	1.4	111.71	1	-2	0	1	8	7	7	1	0	0	1	0	0	1	0	0
480	Q8CI67;Q3UL16;B1ATV0;Q9WVD4;Q8C6W8	Q8CI67;Q3UL16;B1ATV0;Q9WVD4;Q8C6W8	Chloride channel protein;H(+)/Cl(-) exchange transporter 5	Clcn5	tr|Q8CI67|Q8CI67_MOUSE Chloride channel 5 OS=Mus musculus GN=Clcn5 PE=2 SV=1;tr|Q3UL16|Q3UL16_MOUSE Putative uncharacterized protein OS=Mus musculus GN=Clcn5 PE=2 SV=1;tr|B1ATV0|B1ATV0_MOUSE H(+)/Cl(-) exchange transporter 5 OS=Mus musculus GN=Clcn5 PE=4 S	330010000	205870000	245340000	25201000	10645000	6641100	7914300	550430000	478740000	393070000	8	8	6	16.5	16.5	14.3	83.1	0	12.522	781220000	17	6	4	6	6	4	6	4	3	4	6	4	7
481	B1ATZ0;B1ATZ1;Q3TLL4;Q3UMA3;Q99LI8;B1ATY9;F6VV02	B1ATZ0;B1ATZ1;Q3TLL4;Q3UMA3;Q99LI8;B1ATY9	Hepatocyte growth factor-regulated tyrosine kinase substrate	Hgs	tr|B1ATZ0|B1ATZ0_MOUSE Hepatocyte growth factor-regulated tyrosine kinase substrate OS=Mus musculus GN=Hgs PE=1 SV=1;tr|B1ATZ1|B1ATZ1_MOUSE Hepatocyte growth factor-regulated tyrosine kinase substrate OS=Mus musculus GN=Hgs PE=1 SV=1;tr|Q3TLL4|Q3TLL4_MOUSE	1485100000	1536200000	1350300000	106620000	36222000	37468000	32933000	2000900000	1916000000	2023800000	20	20	20	30.8	30.8	30.8	85.778	0	99.298	4371500000	53	15	19	15	15	19	15	15	19	15	19	16	18
482	B1AU25;Q9Z0X1;Q1L6K5;Q2QKE3	B1AU25;Q9Z0X1;Q1L6K5	Apoptosis-inducing factor 1, mitochondrial	Aifm1	tr|B1AU25|B1AU25_MOUSE Apoptosis-inducing factor 1, mitochondrial OS=Mus musculus GN=Aifm1 PE=1 SV=1;sp|Q9Z0X1|AIFM1_MOUSE Apoptosis-inducing factor 1, mitochondrial OS=Mus musculus GN=Aifm1 PE=1 SV=1;tr|Q1L6K5|Q1L6K5_MOUSE Apoptosis-inducing factor short	7543300000	6717200000	6014500000	614390000	228590000	203550000	182260000	10533000000	10741000000	10281000000	22	22	22	49	49	49	66.113	0	223.8	20275000000	120	19	18	18	19	18	18	19	18	18	42	39	39
483	B1AU74;Q9CWP6-2;Q9CWP6-3;Q9CWP6;Q3U0U1;Q9CWP6-4	B1AU74;Q9CWP6-2;Q9CWP6-3;Q9CWP6;Q3U0U1;Q9CWP6-4	Motile sperm domain-containing protein 2	Mospd2	tr|B1AU74|B1AU74_MOUSE Motile sperm domain-containing protein 2 OS=Mus musculus GN=Mospd2 PE=4 SV=1;sp|Q9CWP6-2|MSPD2_MOUSE Isoform 2 of Motile sperm domain-containing protein 2 OS=Mus musculus GN=Mospd2;sp|Q9CWP6-3|MSPD2_MOUSE Isoform 3 of Motile sperm do	525000000	541600000	674660000	54414000	16406000	16925000	21083000	882570000	876860000	1277500000	8	8	8	17.6	17.6	17.6	59.81	0	22.26	1741300000	20	6	4	6	6	4	6	6	4	6	5	8	7
484	B1AU75;Q99MD9;B1AU76;Q99MD9-2;Q3TTH5	B1AU75;Q99MD9;B1AU76;Q99MD9-2	Nuclear autoantigenic sperm protein	Nasp	tr|B1AU75|B1AU75_MOUSE Nuclear autoantigenic sperm protein OS=Mus musculus GN=Nasp PE=1 SV=1;sp|Q99MD9|NASP_MOUSE Nuclear autoantigenic sperm protein OS=Mus musculus GN=Nasp PE=1 SV=2;tr|B1AU76|B1AU76_MOUSE Nuclear autoantigenic sperm protein OS=Mus muscul	5661500000	6120300000	5398100000	399530000	131660000	142330000	125540000	6839600000	7869100000	7466600000	35	35	35	60.8	60.8	60.8	84.012	0	323.31	17180000000	143	26	31	31	26	31	31	26	31	31	49	50	44
485	B1AUN3;Q3UKV0;B1AUN2;A4FUS0;A0AUM9;Q3T9T4	B1AUN3;Q3UKV0;B1AUN2;A4FUS0;A0AUM9;Q3T9T4		Eif2b3	tr|B1AUN3|B1AUN3_MOUSE Protein Eif2b3 OS=Mus musculus GN=Eif2b3 PE=4 SV=1;tr|Q3UKV0|Q3UKV0_MOUSE Protein Eif2b3 OS=Mus musculus GN=Eif2b3 PE=2 SV=1;tr|B1AUN2|B1AUN2_MOUSE MCG14442 OS=Mus musculus GN=Eif2b3 PE=4 SV=1;tr|A4FUS0|A4FUS0_MOUSE Eif2b3 protein OS	1176300000	683970000	571660000	86854000	42010000	24427000	20417000	1212100000	1359300000	1239300000	18	18	18	55.4	55.4	55.4	45.065	0	73.83	2431900000	40	15	13	9	15	13	9	15	13	9	18	12	10
486	G3UXR9;G8JL47;B1AUR6-2;B1AUR6;G3UYM2	G3UXR9;G8JL47;B1AUR6-2;B1AUR6	Protein MMS22-like	Mms22l	tr|G3UXR9|G3UXR9_MOUSE Protein MMS22-like (Fragment) OS=Mus musculus GN=Mms22l PE=4 SV=1;tr|G8JL47|G8JL47_MOUSE Protein MMS22-like OS=Mus musculus GN=Mms22l PE=4 SV=1;sp|B1AUR6-2|MMS22_MOUSE Isoform 2 of Protein MMS22-like OS=Mus musculus GN=Mms22l;sp|B1AU	0	90838000	11652000	2440300	0	2162800	277440	0	102670000	0	3	3	3	3.5	3.5	3.5	83.803	0.0010451	2.384	102490000	4	1	2	1	1	2	1	1	2	1	1	2	1
487	F6TQF4;F6THK7;B1AUW8;B1AUW9;Q540G0;Q8BR10;Q99J34;B1AUW6;Q62406;Q62406-2;Q8K4N6;Q8K4N7;F7CUT1;Q8K4N8	F6TQF4;F6THK7;B1AUW8;B1AUW9;Q540G0;Q8BR10;Q99J34;B1AUW6;Q62406;Q62406-2;Q8K4N6;Q8K4N7;F7CUT1;Q8K4N8	Interleukin-1 receptor-associated kinase 1	Irak1;IRAK1b;IRAK1a	tr|F6TQF4|F6TQF4_MOUSE Interleukin-1 receptor-associated kinase 1 (Fragment) OS=Mus musculus GN=Irak1 PE=4 SV=1;tr|F6THK7|F6THK7_MOUSE Interleukin-1 receptor-associated kinase 1 (Fragment) OS=Mus musculus GN=Irak1 PE=4 SV=1;tr|B1AUW8|B1AUW8_MOUSE Interleuk	11078000	0	0	1230900	1230900	0	0	14705000	0	0	2	2	2	8.9	8.9	8.9	27.423	0.002748	1.9294	11078000	1	2	1	1	2	1	1	2	1	1	1	0	0
488	B1AUY7;Q540H0;Q9QY36;B1AUY8;Q684Q8	B1AUY7;Q540H0;Q9QY36;B1AUY8;Q684Q8	N-alpha-acetyltransferase 10	Naa10	tr|B1AUY7|B1AUY7_MOUSE N-alpha-acetyltransferase 10 OS=Mus musculus GN=Naa10 PE=4 SV=1;tr|Q540H0|Q540H0_MOUSE N-acetyltransferase ARD1 homolog (S. cerevisiae), isoform CRA_e OS=Mus musculus GN=Naa10 PE=2 SV=1;sp|Q9QY36|NAA10_MOUSE N-alpha-acetyltransferase	1281000000	1124900000	1423500000	239340000	80064000	70305000	88967000	2097600000	1839000000	2071600000	9	9	3	54.1	54.1	14.2	26.318	0	63.799	3829400000	40	8	7	6	8	7	6	3	2	0	13	16	11
489	B1AV39;Q6IE82	B1AV39;Q6IE82	Protein Jade-3	Jade3	tr|B1AV39|B1AV39_MOUSE Protein Jade-3 OS=Mus musculus GN=Jade3 PE=1 SV=1;sp|Q6IE82|JADE3_MOUSE Protein Jade-3 OS=Mus musculus GN=Jade3 PE=1 SV=1	36223000	46858000	97998000	3852700	770700	996980	2085100	92325000	126910000	121930000	4	4	3	8	8	6.3	93.585	0	8.1429	181080000	8	2	2	4	2	2	4	1	1	3	2	2	4
490	B9EJX2;B7ZWM3;B2RXX7;B1AV60	B9EJX2;B7ZWM3;B2RXX7;B1AV60		Nhs	tr|B9EJX2|B9EJX2_MOUSE Nance-Horan syndrome (Human) OS=Mus musculus GN=Nhs PE=2 SV=1;tr|B7ZWM3|B7ZWM3_MOUSE Nhs protein OS=Mus musculus GN=Nhs PE=2 SV=1;tr|B2RXX7|B2RXX7_MOUSE Nhs protein OS=Mus musculus GN=Nhs PE=2 SV=1;tr|B1AV60|B1AV60_MOUSE Protein Nhs	3923800	0	0	47851	47851	0	0	3923800	0	0	1	1	1	0.9	0.9	0.9	176.62	0.0046955	1.7192	3923800	2	1	0	1	1	0	1	1	0	1	1	0	1
491	B1AV66;Q8BR70	B1AV66;Q8BR70	Protein YIPF;Protein YIPF6	Yipf6	tr|B1AV66|B1AV66_MOUSE Protein YIPF6 (Fragment) OS=Mus musculus GN=Yipf6 PE=4 SV=1;sp|Q8BR70|YIPF6_MOUSE Protein YIPF6 OS=Mus musculus GN=Yipf6 PE=2 SV=1	113690000	110990000	77728000	27492000	10336000	10090000	7066200	113690000	115830000	82027000	1	1	1	7.1	7.1	7.1	21.781	0	7.3087	302410000	3	1	1	1	1	1	1	1	1	1	1	1	1
492	B1AV75;Q3UJP5	B1AV75;Q3UJP5	Protein C8orf37 homolog	2610301B20Rik	tr|B1AV75|B1AV75_MOUSE Protein 2610301B20Rik OS=Mus musculus GN=2610301B20Rik PE=4 SV=1;sp|Q3UJP5|CH037_MOUSE Protein C8orf37 homolog OS=Mus musculus PE=1 SV=1	0	0	30293000	2019500	0	0	2019500	0	0	49247000	2	2	2	18.1	18.1	18.1	23.935	0	10.999	30293000	2	0	0	2	0	0	2	0	0	2	0	0	2
493	B1AVH5;Q3U4G8;B1AVH4;Q8C0P5;Q8BLN0;Q8R0L6;Q3U8R5;Q6NVB7	B1AVH5;Q3U4G8;B1AVH4;Q8C0P5;Q8BLN0	Coronin;Coronin-2A	Coro2a	tr|B1AVH5|B1AVH5_MOUSE Coronin OS=Mus musculus GN=Coro2a PE=3 SV=1;tr|Q3U4G8|Q3U4G8_MOUSE Coronin OS=Mus musculus GN=Coro2a PE=2 SV=1;tr|B1AVH4|B1AVH4_MOUSE Coronin OS=Mus musculus GN=Coro2a PE=2 SV=1;sp|Q8C0P5|COR2A_MOUSE Coronin-2A OS=Mus musculus GN=Cor	85260000	18620000	140790000	6796300	2368300	517220	3910700	153760000	136170000	163920000	6	6	5	8.8	8.8	7.6	61.708	0	7.1637	244670000	22	5	3	5	5	3	5	5	3	4	8	5	9
494	E7FLY0;B1AVY7	E7FLY0;B1AVY7	Kinesin-like protein;Kinesin-like protein KIF16B	Kif16b	tr|E7FLY0|E7FLY0_MOUSE Kinesin superfamily protein 16B OS=Mus musculus GN=Kif16b PE=2 SV=1;sp|B1AVY7|KI16B_MOUSE Kinesin-like protein KIF16B OS=Mus musculus GN=Kif16b PE=1 SV=1	19799000	0	19379000	477790	241450	0	236330	0	0	40365000	5	4	4	4.6	3.9	3.9	151.29	0.000306	2.6964	39179000	3	2	1	4	1	0	3	1	0	3	1	0	2
495	B1AVZ0	B1AVZ0	Uracil phosphoribosyltransferase homolog	Uprt	sp|B1AVZ0|UPP_MOUSE Uracil phosphoribosyltransferase homolog OS=Mus musculus GN=Uprt PE=2 SV=1	1135500000	953780000	370010000	136630000	63081000	52988000	20556000	1435700000	1588800000	1075500000	10	10	10	46.5	46.5	46.5	34.278	0	76.257	2459300000	36	7	9	6	7	9	6	7	9	6	13	16	7
496	B1AW21;Q9D4L1;Q9Z2C5;Q3TLK7;Q8CD00;Q5DTJ6;Q8CCE6;Q3UDN6	B1AW21;Q9D4L1;Q9Z2C5;Q3TLK7;Q8CD00;Q5DTJ6	Myotubularin	Mtm1	tr|B1AW21|B1AW21_MOUSE Myotubularin OS=Mus musculus GN=Mtm1 PE=4 SV=1;tr|Q9D4L1|Q9D4L1_MOUSE Putative uncharacterized protein OS=Mus musculus GN=Mtm1 PE=2 SV=1;sp|Q9Z2C5|MTM1_MOUSE Myotubularin OS=Mus musculus GN=Mtm1 PE=1 SV=2;tr|Q3TLK7|Q3TLK7_MOUSE Putat	65953000	81132000	41786000	4842800	1691100	2080300	1071400	105540000	98591000	77549000	5	4	4	10.8	9.3	9.3	65.962	0	5.1995	188870000	7	2	3	4	2	3	3	2	3	3	2	2	3
497	B1AW58;Q8BW96;Q3TDM2;Q3UH04;Q8BW96-2;Q8BW96-3	B1AW58;Q8BW96;Q3TDM2;Q3UH04;Q8BW96-2;Q8BW96-3	Calcium/calmodulin-dependent protein kinase type 1D	Camk1d	tr|B1AW58|B1AW58_MOUSE Calcium/calmodulin-dependent protein kinase ID OS=Mus musculus GN=Camk1d PE=2 SV=1;sp|Q8BW96|KCC1D_MOUSE Calcium/calmodulin-dependent protein kinase type 1D OS=Mus musculus GN=Camk1d PE=1 SV=2;tr|Q3TDM2|Q3TDM2_MOUSE Putative uncharac	73281000	52611000	108490000	11161000	3489600	2505300	5166200	151300000	87448000	260220000	8	4	4	32.2	20.5	20.5	42.918	0	25.881	234380000	12	7	6	7	3	3	3	3	3	3	4	3	5
498	B1AWB9;O88207;A3KGE7	B1AWB9;O88207	Collagen alpha-1(V) chain	Col5a1	tr|B1AWB9|B1AWB9_MOUSE Collagen, type V, alpha 1 OS=Mus musculus GN=Col5a1 PE=2 SV=1;sp|O88207|CO5A1_MOUSE Collagen alpha-1(V) chain OS=Mus musculus GN=Col5a1 PE=2 SV=2	70387000	33479000	0	1070800	725640	345140	0	97157000	89873000	0	3	3	3	3.9	3.9	3.9	183.67	0	10.161	103870000	5	3	2	0	3	2	0	3	2	0	3	2	0
499	B1AWE0;Q6PFA2;B1AWE1;B1AWD8;B1AWD9;O08585;Q3THU7	B1AWE0;Q6PFA2;B1AWE1;B1AWD8;B1AWD9;O08585;Q3THU7	Clathrin light chain A	Clta	tr|B1AWE0|B1AWE0_MOUSE Clathrin light chain A OS=Mus musculus GN=Clta PE=1 SV=1;tr|Q6PFA2|Q6PFA2_MOUSE Clathrin light chain A OS=Mus musculus GN=Clta PE=1 SV=1;tr|B1AWE1|B1AWE1_MOUSE Clathrin light chain A OS=Mus musculus GN=Clta PE=1 SV=1;tr|B1AWD8|B1AWD8	6498000000	4365400000	5414000000	1627700000	649800000	436540000	541400000	5953200000	6424200000	6767000000	8	8	8	31	31	31	23.478	0	30.462	16277000000	28	7	5	6	7	5	6	7	5	6	11	9	8
500	B1AWI7;Q6VVW5;Q6VVW5-3;Q6VVW5-2;Q99P52;F6YT88;Q3TZ08	B1AWI7;Q6VVW5;Q6VVW5-3;Q6VVW5-2	Atrial natriuretic peptide receptor 2	Npr2	tr|B1AWI7|B1AWI7_MOUSE Atrial natriuretic peptide receptor 2 OS=Mus musculus GN=Npr2 PE=4 SV=1;sp|Q6VVW5|ANPRB_MOUSE Atrial natriuretic peptide receptor 2 OS=Mus musculus GN=Npr2 PE=2 SV=2;sp|Q6VVW5-3|ANPRB_MOUSE Isoform 3 of Atrial natriuretic peptide rec	56419000	22560000	40399000	2023400	956260	382370	684740	76552000	0	84739000	5	5	5	7.8	7.8	7.8	115.77	0	11.014	119380000	4	3	2	2	3	2	2	3	2	2	2	1	1
501	B1AWL2;A2SW42;B1AWL4;B1AWL5;Q69ZA0	B1AWL2;A2SW42;B1AWL4;B1AWL5		Zfp462	tr|B1AWL2|B1AWL2_MOUSE Protein Zfp462 OS=Mus musculus GN=Zfp462 PE=4 SV=1;tr|A2SW42|A2SW42_MOUSE Zinc finger protein 462 OS=Mus musculus GN=Zfp462 PE=2 SV=1;tr|B1AWL4|B1AWL4_MOUSE Protein Zfp462 OS=Mus musculus GN=Zfp462 PE=4 SV=1;tr|B1AWL5|B1AWL5_MOUSE Pr	176030000	136430000	164390000	3973700	1466900	1136900	1369900	237890000	291400000	181620000	14	14	14	8.3	8.3	8.3	282.71	0	12.403	476840000	18	7	6	7	7	6	7	7	6	7	6	6	6
502	B1AX39;E9Q193;E0CY20	B1AX39;E9Q193;E0CY20	Zinc finger CCHC domain-containing protein 7	Zcchc7	sp|B1AX39|ZCHC7_MOUSE Zinc finger CCHC domain-containing protein 7 OS=Mus musculus GN=Zcchc7 PE=2 SV=1;tr|E9Q193|E9Q193_MOUSE Zinc finger CCHC domain-containing protein 7 (Fragment) OS=Mus musculus GN=Zcchc7 PE=4 SV=1;tr|E0CY20|E0CY20_MOUSE Zinc finger CCH	13832000	14928000	0	1198300	576330	621990	0	15353000	15387000	0	2	2	2	5	5	5	63	0.0007512	2.4615	28760000	3	1	2	0	1	2	0	1	2	0	1	2	0
503	B1AX78;Q2TPA8;Q99JH2;B1AX77;Q9D015	B1AX78;Q2TPA8;Q99JH2;B1AX77;Q9D015	Hydroxysteroid dehydrogenase-like protein 2	Hsdl2	tr|B1AX78|B1AX78_MOUSE Hydroxysteroid dehydrogenase-like protein 2 OS=Mus musculus GN=Hsdl2 PE=1 SV=1;sp|Q2TPA8|HSDL2_MOUSE Hydroxysteroid dehydrogenase-like protein 2 OS=Mus musculus GN=Hsdl2 PE=1 SV=1;tr|Q99JH2|Q99JH2_MOUSE Putative uncharacterized prote	214360000	166840000	44907000	15782000	7939400	6179200	1663200	384520000	404560000	105580000	6	6	6	22.2	22.2	22.2	41.866	0	42.01	426110000	12	6	4	1	6	4	1	6	4	1	6	5	1
504	B1AX94;Q3V036	B1AX94;Q3V036	Coiled-coil domain-containing protein 27	Ccdc27	tr|B1AX94|B1AX94_MOUSE Coiled-coil domain containing 27 OS=Mus musculus GN=Ccdc27 PE=2 SV=1;sp|Q3V036|CCD27_MOUSE Coiled-coil domain-containing protein 27 OS=Mus musculus GN=Ccdc27 PE=2 SV=1	0	0	0	0	0	0	0	0	0	0	1	1	1	1.9	1.9	1.9	73.65	1	-2	0	0	1	0	0	1	0	0	1	0	0	0	0	0
505	B1AX98;Q505F5;E9PV22;F6Z4L9;F6YT33	B1AX98;Q505F5;E9PV22	Leucine-rich repeat-containing protein 47	Lrrc47	tr|B1AX98|B1AX98_MOUSE Leucine rich repeat containing 47 OS=Mus musculus GN=Lrrc47 PE=2 SV=1;sp|Q505F5|LRC47_MOUSE Leucine-rich repeat-containing protein 47 OS=Mus musculus GN=Lrrc47 PE=2 SV=1;tr|E9PV22|E9PV22_MOUSE Leucine-rich repeat-containing protein 4	3981800000	3760400000	3647600000	299730000	104780000	98957000	95990000	6817200000	6025000000	5880500000	27	27	27	64.5	64.5	64.5	63.589	0	101.82	11390000000	119	20	20	25	20	20	25	20	20	25	43	35	41
506	Q3V085;B1AXB9	Q3V085;B1AXB9		Gm4907	tr|Q3V085|Q3V085_MOUSE Putative uncharacterized protein OS=Mus musculus GN=Gm4907 PE=2 SV=1;tr|B1AXB9|B1AXB9_MOUSE Predicted gene, EG236749 OS=Mus musculus GN=Gm4907 PE=2 SV=1	0	0	0	0	0	0	0	0	0	0	4	1	1	10.5	2.9	2.9	46.755	1	-2	0	0	3	2	3	1	0	0	1	0	0	0	0	0
507	B1AXD8	B1AXD8	Akirin-2	Akirin2	sp|B1AXD8|AKIR2_MOUSE Akirin-2 OS=Mus musculus GN=Akirin2 PE=1 SV=1	53600000	1324500000	1253400000	263150000	5360000	132450000	125340000	378020000	1435100000	1656100000	2	2	2	12.4	12.4	12.4	22.113	0	4.2106	2631500000	5	2	2	2	2	2	2	2	2	2	1	2	2
508	B1AXI9;J3QMP9;Q62036	B1AXI9;J3QMP9;Q62036	Centrosomal protein of 131 kDa	Cep131	tr|B1AXI9|B1AXI9_MOUSE 5-azacytidine induced gene 1 OS=Mus musculus GN=Cep131 PE=1 SV=1;tr|J3QMP9|J3QMP9_MOUSE Centrosomal protein of 131 kDa OS=Mus musculus GN=Cep131 PE=1 SV=1;sp|Q62036|CP131_MOUSE Centrosomal protein of 131 kDa OS=Mus musculus GN=Cep131	7954300000	7431800000	7636400000	319760000	110480000	103220000	106060000	10583000000	10244000000	9426000000	12	12	12	16.4	16.4	16.4	120.23	0	35.127	23022000000	36	10	9	9	10	9	9	10	9	9	13	12	11
509	B1AXJ1;B2RPS6;Q3U3N6;B1AXJ2	B1AXJ1;B2RPS6;Q3U3N6;B1AXJ2	AP-4 complex accessory subunit tepsin	Enthd2	tr|B1AXJ1|B1AXJ1_MOUSE AP-4 complex accessory subunit tepsin OS=Mus musculus GN=Enthd2 PE=4 SV=1;tr|B2RPS6|B2RPS6_MOUSE Uncharacterized protein OS=Mus musculus GN=Enthd2 PE=2 SV=1;sp|Q3U3N6|AP4AT_MOUSE AP-4 complex accessory subunit tepsin OS=Mus musculus	0	28811000	37966000	2384900	0	1028900	1355900	0	50022000	56639000	2	2	2	6.3	6.3	6.3	60.164	0	3.1206	66776000	3	0	1	2	0	1	2	0	1	2	0	1	2
510	B1AXP6;B1AXP6-2;B1AXP6-4	B1AXP6;B1AXP6-2;B1AXP6-4	Mitochondrial import receptor subunit TOM5 homolog	Tomm5	sp|B1AXP6|TOM5_MOUSE Mitochondrial import receptor subunit TOM5 homolog OS=Mus musculus GN=Tomm5 PE=3 SV=1;sp|B1AXP6-2|TOM5_MOUSE Isoform 2 of Mitochondrial import receptor subunit TOM5 homolog OS=Mus musculus GN=Tomm5;sp|B1AXP6-4|TOM5_MOUSE Isoform 4 of M	516200000	37465000	47762000	120290000	103240000	7493000	9552300	0	94455000	102460000	3	3	1	47.1	47.1	13.7	6.0372	0.0095555	1.3413	601430000	4	2	1	1	2	1	1	0	1	1	2	1	1
511	B1AXP6-3	B1AXP6-3	Mitochondrial import receptor subunit TOM5 homolog	Tomm5	sp|B1AXP6-3|TOM5_MOUSE Isoform 3 of Mitochondrial import receptor subunit TOM5 homolog OS=Mus musculus GN=Tomm5	0	0	8877400	1479600	0	0	1479600	0	0	11701000	3	1	1	50.8	23	23	7.0403	1	-2	8877400	1	2	0	1	0	0	1	0	0	1	0	0	1
512	B1AY10;B1AY10-2;B1AY10-3;Q9D9E1	B1AY10;B1AY10-2;B1AY10-3	Transcriptional repressor NF-X1	Nfx1	sp|B1AY10|NFX1_MOUSE Transcriptional repressor NF-X1 OS=Mus musculus GN=Nfx1 PE=2 SV=1;sp|B1AY10-2|NFX1_MOUSE Isoform 2 of Transcriptional repressor NF-X1 OS=Mus musculus GN=Nfx1;sp|B1AY10-3|NFX1_MOUSE Isoform 3 of Transcriptional repressor NF-X1 OS=Mus mu	193890000	182790000	200350000	8485700	2851300	2688100	2946300	309690000	358930000	369390000	9	9	9	12.3	12.3	12.3	123.81	0	21.637	577030000	22	5	7	7	5	7	7	5	7	7	6	8	8
513	E9PV45;B1AY13;B1AY13-2	E9PV45;B1AY13	Ubiquitin carboxyl-terminal hydrolase;Ubiquitin carboxyl-terminal hydrolase 24	Usp24	tr|E9PV45|E9PV45_MOUSE Ubiquitin carboxyl-terminal hydrolase OS=Mus musculus GN=Usp24 PE=1 SV=1;sp|B1AY13|UBP24_MOUSE Ubiquitin carboxyl-terminal hydrolase 24 OS=Mus musculus GN=Usp24 PE=1 SV=1	1728600000	1431000000	1410100000	30465000	11524000	9540000	9401000	2669300000	2566300000	2509500000	41	41	41	21.7	21.7	21.7	294.13	0	108.93	4569700000	105	31	27	28	31	27	28	31	27	28	39	35	31
514	Q9D2L4;B1AYG7;B1AYG6;Q9Z0T9	Q9D2L4;B1AYG7;B1AYG6;Q9Z0T9	Integrin beta;Integrin beta-6	Itgb6	tr|Q9D2L4|Q9D2L4_MOUSE Integrin beta OS=Mus musculus GN=Itgb6 PE=2 SV=1;tr|B1AYG7|B1AYG7_MOUSE Integrin beta (Fragment) OS=Mus musculus GN=Itgb6 PE=3 SV=1;tr|B1AYG6|B1AYG6_MOUSE Integrin beta OS=Mus musculus GN=Itgb6 PE=3 SV=1;sp|Q9Z0T9|ITB6_MOUSE Integrin	2957400000	2542600000	2112200000	400640000	155650000	133820000	111170000	6180000000	4941100000	4922800000	1	1	1	3.1	3.1	3.1	32.256	0.0064489	1.5042	7612200000	14	1	1	1	1	1	1	1	1	1	6	5	3
515	B1AZ15;B1AZ14;Q3UMF0-4;Q3UMF0-2;Q3UMF0-3;Q3UMF0;B1AZ26;B1AZ25;B1AZ20;Q8BJK8	B1AZ15;B1AZ14;Q3UMF0-4;Q3UMF0-2;Q3UMF0-3;Q3UMF0	Cordon-bleu protein-like 1	Cobll1	tr|B1AZ15|B1AZ15_MOUSE Cordon-bleu protein-like 1 OS=Mus musculus GN=Cobll1 PE=1 SV=1;tr|B1AZ14|B1AZ14_MOUSE Cordon-bleu protein-like 1 OS=Mus musculus GN=Cobll1 PE=1 SV=1;sp|Q3UMF0-4|COBL1_MOUSE Isoform 4 of Cordon-bleu protein-like 1 OS=Mus musculus GN=C	4194800000	3771200000	3915700000	146690000	51788000	46558000	48342000	7379900000	6380600000	6473500000	46	46	46	50.9	50.9	50.9	133.27	0	127.54	11882000000	156	37	37	36	37	37	36	37	37	36	56	49	51
516	B1AZ39;P0C0A3;B1AZ42;B1AZ41;Q3TS10	B1AZ39;P0C0A3;B1AZ42	Charged multivesicular body protein 6	Chmp6	tr|B1AZ39|B1AZ39_MOUSE Chromatin modifying protein 6 OS=Mus musculus GN=Chmp6 PE=2 SV=1;sp|P0C0A3|CHMP6_MOUSE Charged multivesicular body protein 6 OS=Mus musculus GN=Chmp6 PE=2 SV=2;tr|B1AZ42|B1AZ42_MOUSE Charged multivesicular body protein 6 (Fragment) O	222660000	190310000	164700000	52516000	20242000	17301000	14973000	232840000	233740000	212470000	5	4	4	34	31	31	23.415	0	14.818	577670000	8	4	3	2	4	2	2	4	2	2	4	2	2
517	D3YWD3;B1AZA5;B1AZA8	D3YWD3;B1AZA5;B1AZA8	Transmembrane protein 245	Tmem245	tr|D3YWD3|D3YWD3_MOUSE Transmembrane protein 245 OS=Mus musculus GN=Tmem245 PE=1 SV=1;sp|B1AZA5|TM245_MOUSE Transmembrane protein 245 OS=Mus musculus GN=Tmem245 PE=1 SV=1;tr|B1AZA8|B1AZA8_MOUSE Transmembrane protein 245 (Fragment) OS=Mus musculus GN=Tmem24	76285000	424340000	477890000	36241000	2825400	15716000	17700000	414790000	659030000	738540000	5	5	5	8.5	8.5	8.5	97.73	0	40.416	978510000	19	3	5	4	3	5	4	3	5	4	3	7	9
518	B1AZI6;Q3US09;Q3UYT9;Q3UUT9;F6SBF2;Q8C690;Q3TPY8;F6QCT0;B1AZI7;F6RBN0	B1AZI6;Q3US09	THO complex subunit 2	Thoc2	sp|B1AZI6|THOC2_MOUSE THO complex subunit 2 OS=Mus musculus GN=Thoc2 PE=1 SV=1;tr|Q3US09|Q3US09_MOUSE Putative uncharacterized protein (Fragment) OS=Mus musculus GN=Thoc2 PE=2 SV=1	2952700000	2602700000	2231800000	89508000	33939000	29916000	25653000	5025900000	4533200000	5013300000	34	34	22	28.5	28.5	18.1	182.77	0	117.66	7787200000	122	26	26	25	26	26	25	16	18	16	37	47	38
519	Q3UCF7;B7ZNS2;B1AZP2-3;B1AZP2-2;B1AZP2;E9PUF2;I1E4X0;F6YMR0;H3BJW9;H3BKJ0;H3BL90;H3BJD4	Q3UCF7;B7ZNS2;B1AZP2-3;B1AZP2-2;B1AZP2;E9PUF2;I1E4X0;F6YMR0;H3BJW9	Disks large-associated protein 4	Dlgap4	tr|Q3UCF7|Q3UCF7_MOUSE Putative uncharacterized protein (Fragment) OS=Mus musculus GN=Dlgap4 PE=2 SV=1;tr|B7ZNS2|B7ZNS2_MOUSE Disks large-associated protein 4 OS=Mus musculus GN=Dlgap4 PE=1 SV=1;sp|B1AZP2-3|DLGP4_MOUSE Isoform 3 of Disks large-associated p	251790000	228850000	227880000	27251000	9684200	8801900	8764500	365920000	328460000	256490000	6	6	6	22.5	22.5	22.5	49.849	0	19.718	708520000	16	4	4	4	4	4	4	4	4	4	7	4	5
520	B1B0C7;E9PZ16;Q3UHH3;Q5RKM8;Q52KG8;Q2XQV0	B1B0C7;E9PZ16;Q3UHH3		Hspg2	tr|B1B0C7|B1B0C7_MOUSE Basement membrane-specific heparan sulfate proteoglycan core protein OS=Mus musculus GN=Hspg2 PE=4 SV=1;tr|E9PZ16|E9PZ16_MOUSE Basement membrane-specific heparan sulfate proteoglycan core protein OS=Mus musculus GN=Hspg2 PE=4 SV=1;tr	1653900000	1386800000	1515900000	23982000	8704700	7299000	7978500	2709400000	2687200000	2670600000	47	47	10	18.9	18.9	4.8	469.02	0	145.99	4556600000	110	35	32	32	35	32	32	8	6	7	36	35	39
521	B1B0E8;Q62377;Q8BST8;Q793C9;Q64707	B1B0E8;Q62377;Q8BST8;Q793C9;Q64707	U2 small nuclear ribonucleoprotein auxiliary factor 35 kDa subunit-related protein 2;U2 small nuclear ribonucleoprotein auxiliary factor 35 kDa subunit-related protein 1	Zrsr2;Zrsr1	tr|B1B0E8|B1B0E8_MOUSE U2 small nuclear ribonucleoprotein auxiliary factor 35 kDa subunit-related protein 2 OS=Mus musculus GN=Zrsr2 PE=4 SV=1;sp|Q62377|U2AFM_MOUSE U2 small nuclear ribonucleoprotein auxiliary factor 35 kDa subunit-related protein 2 OS=Mus	25517000	25124000	0	1875600	945080	930510	0	58766000	49909000	0	2	2	2	3.3	3.3	3.3	64.448	0	3.2633	50641000	2	1	2	0	1	2	0	1	2	0	1	1	0
522	B1B1A8;Q6PDN3-2;Q6PDN3-3;Q6PDN3	B1B1A8;Q6PDN3-2;Q6PDN3-3;Q6PDN3	Myosin light chain kinase, smooth muscle;Myosin light chain kinase, smooth muscle, deglutamylated form	Mylk	tr|B1B1A8|B1B1A8_MOUSE Myosin light chain kinase, smooth muscle OS=Mus musculus GN=Mylk PE=1 SV=1;sp|Q6PDN3-2|MYLK_MOUSE Isoform 2 of Myosin light chain kinase, smooth muscle OS=Mus musculus GN=Mylk;sp|Q6PDN3-3|MYLK_MOUSE Isoform 3 of Myosin light chain ki	69849000	95165000	41419000	1678300	567880	773700	336740	128380000	163760000	118030000	1	1	1	0.4	0.4	0.4	213.61	0.0027516	1.9424	206430000	3	1	1	1	1	1	1	1	1	1	1	1	1
523	B1B1D8;Q9D773;B1B1D7	B1B1D8;Q9D773	39S ribosomal protein L2, mitochondrial	Mrpl2	tr|B1B1D8|B1B1D8_MOUSE 39S ribosomal protein L2, mitochondrial OS=Mus musculus GN=Mrpl2 PE=4 SV=1;sp|Q9D773|RM02_MOUSE 39S ribosomal protein L2, mitochondrial OS=Mus musculus GN=Mrpl2 PE=2 SV=1	671860000	462540000	531190000	87663000	35361000	24344000	27957000	1112300000	844970000	939360000	5	5	5	26.6	26.6	26.6	33.099	0	24.904	1665600000	25	4	5	4	4	5	4	4	5	4	10	8	7
524	B1GX80;B1GX81;Q61036-2;Q61036;A3KGC5	B1GX80;B1GX81;Q61036-2;Q61036;A3KGC5	Non-specific serine/threonine protein kinase;Serine/threonine-protein kinase PAK 3	Pak3	tr|B1GX80|B1GX80_MOUSE PAK3c protein OS=Mus musculus GN=Pak3 PE=2 SV=1;tr|B1GX81|B1GX81_MOUSE PAK3cb protein OS=Mus musculus GN=Pak3 PE=2 SV=1;sp|Q61036-2|PAK3_MOUSE Isoform 2 of Serine/threonine-protein kinase PAK 3 OS=Mus musculus GN=Pak3;sp|Q61036|PAK3_	76148000	52826000	27578000	5218400	2538300	1760900	919270	112450000	97247000	79108000	12	3	3	27.4	10.4	10.4	63.001	0	8.8824	156550000	4	10	10	10	2	2	3	2	2	3	1	1	2
525	S4R1B9;B1Q2W7;D3YZK4;Q80UV9-3;Q80UV9;Q80UV9-2;A0A067XG50	S4R1B9;B1Q2W7;D3YZK4;Q80UV9-3;Q80UV9	Transcription initiation factor TFIID subunit 1	Taf1	tr|S4R1B9|S4R1B9_MOUSE Transcription initiation factor TFIID subunit 1 OS=Mus musculus GN=Taf1 PE=1 SV=1;tr|B1Q2W7|B1Q2W7_MOUSE TAF1 RNA polymerase II, TATA box binding protein (TBP)-associated factor, neuron specific isoform OS=Mus musculus GN=Taf1 PE=2 S	114190000	148310000	248070000	6006700	1343400	1744800	2918500	246840000	276940000	388800000	9	9	9	6.5	6.5	6.5	197.37	0	10.459	510570000	16	5	6	7	5	6	7	5	6	7	4	5	7
526	B2CY77;P14206	B2CY77;P14206	40S ribosomal protein SA	Rpsa	tr|B2CY77|B2CY77_MOUSE Laminin receptor (Fragment) OS=Mus musculus GN=Rpsa PE=2 SV=1;sp|P14206|RSSA_MOUSE 40S ribosomal protein SA OS=Mus musculus GN=Rpsa PE=1 SV=4	28810000000	32127000000	27366000000	5886900000	1920700000	2141800000	1824400000	49014000000	54742000000	50381000000	14	14	14	57.6	57.6	57.6	32.85	0	258.9	88304000000	249	14	13	14	14	13	14	14	13	14	82	83	84
527	B2KF50;Q570Z6	B2KF50;Q570Z6		Uhrf1bp1	tr|B2KF50|B2KF50_MOUSE Protein Uhrf1bp1 OS=Mus musculus GN=Uhrf1bp1 PE=1 SV=1;tr|Q570Z6|Q570Z6_MOUSE MKIAA4127 protein (Fragment) OS=Mus musculus GN=Uhrf1bp1 PE=2 SV=1	338310000	225270000	106670000	8593000	4337300	2888100	1367600	467670000	439700000	305940000	4	3	3	3.2	2.7	2.7	157.01	0	9.5645	670250000	6	4	2	3	3	1	2	3	1	2	3	1	2
528	B2KF54;B2KF52;Q3TT38	B2KF54;B2KF52;Q3TT38	Uncharacterized protein C6orf106 homolog	D17Wsu92e	tr|B2KF54|B2KF54_MOUSE DNA segment, Chr 17, Wayne State University 92, expressed OS=Mus musculus GN=D17Wsu92e PE=2 SV=1;tr|B2KF52|B2KF52_MOUSE Uncharacterized protein C6orf106 homolog OS=Mus musculus GN=D17Wsu92e PE=4 SV=1;sp|Q3TT38|CF106_MOUSE Uncharacter	41274000	33544000	10515000	10667000	5159200	4193000	1314300	0	32294000	20662000	2	2	2	17.1	17.1	17.1	23.929	0	3.1874	85333000	3	1	1	1	1	1	1	1	1	1	1	1	1
529	B2KF73;Q58DZ4;P84102;O88892	B2KF73;Q58DZ4;P84102;O88892	Small EDRK-rich factor 2;Small EDRK-rich factor 1	Serf1;Serf2	tr|B2KF73|B2KF73_MOUSE Small EDRK-rich factor 1 OS=Mus musculus GN=Serf1 PE=4 SV=1;tr|Q58DZ4|Q58DZ4_MOUSE Small EDRK-rich factor 2 OS=Mus musculus GN=Serf2 PE=2 SV=1;sp|P84102|SERF2_MOUSE Small EDRK-rich factor 2 OS=Mus musculus GN=Serf2 PE=2 SV=1;sp|O8889	0	0	48923000	12231000	0	0	12231000	0	0	51629000	1	1	1	16.7	16.7	16.7	5.6684	0.0018989	2.0536	48923000	1	0	0	1	0	0	1	0	0	1	0	0	1
530	B2KFS7;Q8BFQ9	B2KFS7;Q8BFQ9	Kelch-like protein 42	Klhl42	tr|B2KFS7|B2KFS7_MOUSE Kelch domain containing 5 OS=Mus musculus GN=Klhl42 PE=2 SV=1;sp|Q8BFQ9|KLH42_MOUSE Kelch-like protein 42 OS=Mus musculus GN=Klhl42 PE=2 SV=1	0	0	0	0	0	0	0	0	0	0	1	1	1	1.8	1.8	1.8	55.598	1	-2	0	0	0	1	0	0	1	0	0	1	0	0	0	0
531	B2KGA7;Q505B7-2;Q505B7;A8Y5E9	B2KGA7;Q505B7-2;Q505B7;A8Y5E9	Protein archease	Zbtb8os	tr|B2KGA7|B2KGA7_MOUSE Protein archease OS=Mus musculus GN=Zbtb8os PE=4 SV=1;sp|Q505B7-2|ARCH_MOUSE Isoform 2 of Protein archease OS=Mus musculus GN=Zbtb8os;sp|Q505B7|ARCH_MOUSE Protein archease OS=Mus musculus GN=Zbtb8os PE=2 SV=2;tr|A8Y5E9|A8Y5E9_MOUSE P	547900000	583700000	200200000	133180000	54790000	58370000	20020000	622770000	727490000	592990000	3	3	3	23.4	23.4	23.4	19.58	0	11.112	1331800000	11	3	3	2	3	3	2	3	3	2	4	4	3
532	B2LVG5;B2LVG6;E0CXT7;Q8BQZ5;Q8BQZ5-3;Q8BQZ5-2;F7B6Z5;M0QWM8	B2LVG5;B2LVG6;E0CXT7;Q8BQZ5;Q8BQZ5-3;Q8BQZ5-2;F7B6Z5	Cleavage and polyadenylation specificity factor subunit 4	Cpsf4	tr|B2LVG5|B2LVG5_MOUSE Cleavage and polyadenylation specific factor 4 isoform 1 OS=Mus musculus GN=Cpsf4 PE=2 SV=1;tr|B2LVG6|B2LVG6_MOUSE Cleavage and polyadenylation specific factor 4 isoform 2 OS=Mus musculus GN=Cpsf4 PE=2 SV=1;tr|E0CXT7|E0CXT7_MOUSE Cle	494170000	494510000	559430000	91065000	29069000	29089000	32908000	1032100000	1048100000	912810000	8	8	8	46.9	46.9	46.9	27.419	0	12.188	1548100000	32	6	7	7	6	7	7	6	7	7	10	12	10
533	B2M1R6;Q3TL71;P61979-3;Q3U9Q3;Q3U6X2;H3BKD0;H3BKI8;H3BLP7;Q8BT23;H3BJ43;H3BJS9	B2M1R6;Q3TL71;P61979-3;Q3U9Q3;Q3U6X2;H3BKD0	Heterogeneous nuclear ribonucleoprotein K	Hnrnpk	tr|B2M1R6|B2M1R6_MOUSE Heterogeneous nuclear ribonucleoprotein K OS=Mus musculus GN=Hnrnpk PE=1 SV=1;tr|Q3TL71|Q3TL71_MOUSE Putative uncharacterized protein OS=Mus musculus GN=Hnrnpk PE=2 SV=1;sp|P61979-3|HNRPK_MOUSE Isoform 3 of Heterogeneous nuclear ribo	1021000000	418590000	993700000	86904000	36465000	14950000	35489000	1793500000	1331600000	1539400000	27	1	0	64.5	2.7	0	48.562	0	3.9228	2433300000	12	24	25	27	1	1	1	0	0	0	6	2	4
534	B2M1R7;Q61990-3;Q3TF69	B2M1R7;Q61990-3;Q3TF69	Poly(rC)-binding protein 2	Pcbp2	tr|B2M1R7|B2M1R7_MOUSE Poly(RC) binding protein 2 OS=Mus musculus GN=Pcbp2 PE=2 SV=1;sp|Q61990-3|PCBP2_MOUSE Isoform 3 of Poly(rC)-binding protein 2 OS=Mus musculus GN=Pcbp2;tr|Q3TF69|Q3TF69_MOUSE Putative uncharacterized protein OS=Mus musculus GN=Pcbp2 P	414990000	162050000	429810000	50343000	20749000	8102600	21491000	410140000	181620000	488810000	17	1	1	66.5	8	8	38.15	0	20.096	1006900000	7	15	15	15	1	1	1	1	1	1	2	3	2
535	B2MWM9;P14211;Q3UWP8	B2MWM9;P14211;Q3UWP8	Calreticulin	Calr	tr|B2MWM9|B2MWM9_MOUSE Calreticulin OS=Mus musculus GN=Calr PE=2 SV=1;sp|P14211|CALR_MOUSE Calreticulin OS=Mus musculus GN=Calr PE=1 SV=1;tr|Q3UWP8|Q3UWP8_MOUSE Putative uncharacterized protein (Fragment) OS=Mus musculus GN=Calr PE=2 SV=1	88114000000	87171000000	102770000000	9268600000	2937100000	2905700000	3425800000	104760000000	101960000000	122520000000	30	30	30	75.5	75.5	75.5	47.994	0	323.31	278060000000	526	23	26	27	23	26	27	23	26	27	165	167	194
536	B2RPS1;Q0PD56;P61021;Q8C458	B2RPS1;Q0PD56;P61021;Q8C458	Ras-related protein Rab-5B	Rab5b	tr|B2RPS1|B2RPS1_MOUSE RAB5B, member RAS oncogene family OS=Mus musculus GN=Rab5b PE=2 SV=1;tr|Q0PD56|Q0PD56_MOUSE Rab5B OS=Mus musculus GN=Rab5b PE=2 SV=1;sp|P61021|RAB5B_MOUSE Ras-related protein Rab-5B OS=Mus musculus GN=Rab5b PE=1 SV=1;tr|Q8C458|Q8C458	1478200000	1511400000	1200200000	299270000	105580000	107960000	85732000	2452700000	2353100000	3000900000	8	6	6	56.3	46	46	23.707	0	47.255	4189800000	46	7	8	6	5	6	4	5	6	4	16	14	16
537	Q811R6;B2RPU7;P58334	Q811R6;B2RPU7;P58334	Krueppel-like factor 16	Klf16	tr|Q811R6|Q811R6_MOUSE Dopamine receptor regulating factor (Fragment) OS=Mus musculus PE=4 SV=1;tr|B2RPU7|B2RPU7_MOUSE Kruppel-like factor 16 OS=Mus musculus GN=Klf16 PE=2 SV=1;sp|P58334|KLF16_MOUSE Krueppel-like factor 16 OS=Mus musculus GN=Klf16 PE=2 SV=	29896000	17120000	19163000	16545000	7474100	4279900	4790700	48277000	39438000	47711000	1	1	1	20.5	20.5	20.5	14.622	0	11.43	66179000	6	1	1	1	1	1	1	1	1	1	2	2	2
538	D3Z5B1;Q8CEW7;B2RPU8;Q9D1L0;Q8K3S8	D3Z5B1;Q8CEW7;B2RPU8;Q9D1L0	Coiled-coil-helix-coiled-coil-helix domain-containing protein 2	Zbed5;Chchd2	tr|D3Z5B1|D3Z5B1_MOUSE Protein Zbed5 (Fragment) OS=Mus musculus GN=Zbed5 PE=4 SV=2;tr|Q8CEW7|Q8CEW7_MOUSE Putative uncharacterized protein OS=Mus musculus GN=Zbed5 PE=2 SV=1;tr|B2RPU8|B2RPU8_MOUSE MCG130675 OS=Mus musculus GN=Zbed5 PE=2 SV=1;sp|Q9D1L0|CHCH	3728200000	2857100000	2344900000	1116300000	466020000	357140000	293110000	5120900000	4847000000	4049700000	3	3	3	25.1	25.1	25.1	19.183	0	48.576	8930100000	30	3	3	3	3	3	3	3	3	3	9	11	10
539	B2RPV4;Q66JV4;Q66JV4-2;Q80YR9	B2RPV4;Q66JV4;Q66JV4-2;Q80YR9	RNA-binding protein 12B-B;RNA-binding protein 12B-A	Rbm12b2;Rbm12b1	tr|B2RPV4|B2RPV4_MOUSE C430048L16Rik protein OS=Mus musculus GN=Rbm12b2 PE=2 SV=1;sp|Q66JV4|R12BB_MOUSE RNA-binding protein 12B-B OS=Mus musculus GN=Rbm12b2 PE=2 SV=2;sp|Q66JV4-2|R12BB_MOUSE Isoform 2 of RNA-binding protein 12B-B OS=Mus musculus GN=Rbm12b2	236380000	130470000	74237000	7476100	4006500	2211400	1258200	295270000	223320000	238600000	8	8	8	11.5	11.5	11.5	96.423	0	11.65	441090000	19	7	5	4	7	5	4	7	5	4	9	6	4
540	B2RPW2;Q8BGV8	B2RPW2;Q8BGV8	Mitochondrial dynamics protein MID51	Mief1	tr|B2RPW2|B2RPW2_MOUSE Smith-Magenis syndrome chromosome region, candidate 7-like (Human) OS=Mus musculus GN=Mief1 PE=2 SV=1;sp|Q8BGV8|MID51_MOUSE Mitochondrial dynamics protein MID51 OS=Mus musculus GN=Mief1 PE=1 SV=1	27505000	0	26096000	2144100	1100200	0	1043900	51375000	0	0	2	2	2	7.1	7.1	7.1	51.183	0	3.1857	53602000	2	1	0	1	1	0	1	1	0	1	1	0	1
541	B2RPW5;G3X9A7;Q8BLJ3	B2RPW5;G3X9A7;Q8BLJ3	PI-PLC X domain-containing protein 3	Plcxd3	tr|B2RPW5|B2RPW5_MOUSE Plcxd3 protein OS=Mus musculus GN=Plcxd3 PE=2 SV=1;tr|G3X9A7|G3X9A7_MOUSE MCG49978 OS=Mus musculus GN=Plcxd3 PE=4 SV=1;sp|Q8BLJ3|PLCX3_MOUSE PI-PLC X domain-containing protein 3 OS=Mus musculus GN=Plcxd3 PE=2 SV=1	104880000	353680000	196960000	50425000	8068000	27206000	15151000	137660000	462460000	313230000	1	1	1	2.2	2.2	2.2	30.802	1	-2	655520000	13	1	1	1	1	1	1	1	1	1	2	6	5
542	Q8C9P8;Q8BRS0;D6RI27;B2RPZ5;Q8CDU6;D6REW0;H3BJF4	Q8C9P8;Q8BRS0;D6RI27;B2RPZ5;Q8CDU6;D6REW0;H3BJF4	Probable E3 ubiquitin-protein ligase HECTD2	Hectd2	tr|Q8C9P8|Q8C9P8_MOUSE Putative uncharacterized protein OS=Mus musculus GN=Hectd2 PE=2 SV=1;tr|Q8BRS0|Q8BRS0_MOUSE Putative uncharacterized protein OS=Mus musculus GN=Hectd2 PE=2 SV=1;tr|D6RI27|D6RI27_MOUSE Probable E3 ubiquitin-protein ligase HECTD2 (Frag	18982000	24049000	27003000	5387200	1460100	1850000	2077200	34943000	49333000	79907000	2	2	2	11.8	11.8	11.8	23.776	0	3.8409	70034000	4	1	2	1	1	2	1	1	2	1	1	2	1
543	B2RQ11;Q8CD94	B2RQ11;Q8CD94	Protein lin-52 homolog	Lin52	tr|B2RQ11|B2RQ11_MOUSE Lin-52 homolog (C. elegans) OS=Mus musculus GN=Lin52 PE=2 SV=1;sp|Q8CD94|LIN52_MOUSE Protein lin-52 homolog OS=Mus musculus GN=Lin52 PE=2 SV=1	0	0	0	0	0	0	0	0	0	0	1	1	1	12.9	12.9	12.9	13.001	0.001758	2.0976	0	2	1	1	0	1	1	0	1	1	0	1	1	0
544	B2RQ13;B7ZMW5;B7ZMW4;P70261	B2RQ13;B7ZMW5;B7ZMW4;P70261	Paladin	Pald1	tr|B2RQ13|B2RQ13_MOUSE X99384 protein OS=Mus musculus GN=Pald1 PE=2 SV=1;tr|B7ZMW5|B7ZMW5_MOUSE cDNA sequence X99384 OS=Mus musculus GN=Pald1 PE=2 SV=1;tr|B7ZMW4|B7ZMW4_MOUSE X99384 protein OS=Mus musculus GN=Pald1 PE=2 SV=1;sp|P70261|PALD_MOUSE Paladin OS	285670000	257880000	300900000	15354000	5194000	4688700	5470900	446520000	474430000	410490000	12	12	12	21.6	21.6	21.6	96.589	0	43.87	844450000	30	8	9	11	8	9	11	8	9	11	10	10	10
545	B2RQ14;Q8CDA1;Q8CDA1-2;Q8CA68;Q8CDA1-3;Q8CDA1-4	B2RQ14;Q8CDA1	Phosphatidylinositide phosphatase SAC2	Inpp5f	tr|B2RQ14|B2RQ14_MOUSE Inositol polyphosphate-5-phosphatase F OS=Mus musculus GN=Inpp5f PE=2 SV=1;sp|Q8CDA1|SAC2_MOUSE Phosphatidylinositide phosphatase SAC2 OS=Mus musculus GN=Inpp5f PE=1 SV=1	400460000	900110000	355180000	23654000	5720900	12859000	5074100	1001400000	1044100000	992140000	13	13	13	16.1	16.1	16.1	127.61	0	32.633	1655800000	36	8	11	9	8	11	9	8	11	9	10	15	11
546	B2RQ18;Q6P9Q6;Q6P9Q6-2;Q80YW9;Q80YW7;Q80YW6	B2RQ18;Q6P9Q6;Q6P9Q6-2;Q80YW9	Peptidyl-prolyl cis-trans isomerase;FK506-binding protein 15	Fkbp15	tr|B2RQ18|B2RQ18_MOUSE Peptidyl-prolyl cis-trans isomerase OS=Mus musculus GN=Fkbp15 PE=2 SV=1;sp|Q6P9Q6|FKB15_MOUSE FK506-binding protein 15 OS=Mus musculus GN=Fkbp15 PE=1 SV=2;sp|Q6P9Q6-2|FKB15_MOUSE Isoform B of FK506-binding protein 15 OS=Mus musculus	629230000	351260000	349880000	21457000	10149000	5665400	5643200	652820000	795420000	792530000	12	12	12	17	17	17	131.78	0	46.927	1330400000	35	11	7	9	11	7	9	11	7	9	13	10	12
547	B2RQ36;Q8R4C2;Q05D93;D3Z4D2;Q8BR30;Q9CSV9;Q8C424;D6RET4;D3Z7T9	B2RQ36;Q8R4C2;Q05D93;D3Z4D2;Q8BR30;Q9CSV9;Q8C424	RUN and FYVE domain-containing protein 2	Rufy2	tr|B2RQ36|B2RQ36_MOUSE RUN and FYVE domain-containing 2 OS=Mus musculus GN=Rufy2 PE=2 SV=1;sp|Q8R4C2|RUFY2_MOUSE RUN and FYVE domain-containing protein 2 OS=Mus musculus GN=Rufy2 PE=1 SV=2;tr|Q05D93|Q05D93_MOUSE Rufy2 protein (Fragment) OS=Mus musculus GN=	147180000	160210000	169370000	10364000	3199600	3482900	3681900	282850000	352770000	277860000	9	9	9	16	16	16	70.092	0	14.507	476760000	16	4	6	6	4	6	6	4	6	6	3	6	7
548	B7ZMZ2;B2RQ57;F8VQH0;Q4JIM5;Q99P28;Q61055;Q3V2W1;Q3TM13;G3UWQ2	B7ZMZ2;B2RQ57;F8VQH0;Q4JIM5	Non-specific protein-tyrosine kinase;Abelson tyrosine-protein kinase 2	Abl2	tr|B7ZMZ2|B7ZMZ2_MOUSE V-abl Abelson murine leukemia viral oncogene homolog 2 (Arg, Abelson-related gene) OS=Mus musculus GN=Abl2 PE=2 SV=1;tr|B2RQ57|B2RQ57_MOUSE Abelson tyrosine-protein kinase 2 OS=Mus musculus GN=Abl2 PE=1 SV=1;tr|F8VQH0|F8VQH0_MOUSE Ab	184340000	175630000	216290000	10672000	3413700	3252400	4005400	254770000	235670000	290160000	12	12	8	15.4	15.4	10.9	117.78	0	29.652	576260000	25	6	7	10	6	7	10	5	6	7	7	9	9
549	B2RQ71;E9PWR4;B7ZMZ7;Q69ZV2;Q6NY04;Q5EBR0;Q6PGL8;Q8CBE5	B2RQ71;E9PWR4;B7ZMZ7;Q69ZV2;Q6NY04		Dip2c	tr|B2RQ71|B2RQ71_MOUSE Dip2c protein OS=Mus musculus GN=Dip2c PE=2 SV=1;tr|E9PWR4|E9PWR4_MOUSE Protein Dip2c OS=Mus musculus GN=Dip2c PE=4 SV=1;tr|B7ZMZ7|B7ZMZ7_MOUSE Dip2c protein OS=Mus musculus GN=Dip2c PE=2 SV=1;tr|Q69ZV2|Q69ZV2_MOUSE MKIAA0934 protein	347140000	232180000	141340000	9008200	4339200	2902300	1766700	362800000	302570000	334260000	11	9	7	9.4	7.1	5.6	170.92	0	16.543	720660000	13	7	6	5	5	4	4	4	3	3	4	4	5
550	B2RQC6;E9QAI5;G3UWN2;B2RQC6-2;Q6P9L1;E9QAT6;Q7TN13;Q80VF8;F6S3Z3;Q9CWQ9;Q561M8;Q8C196;O88862	B2RQC6;E9QAI5;G3UWN2;B2RQC6-2;Q6P9L1	CAD protein;Glutamine-dependent carbamoyl-phosphate synthase;Aspartate carbamoyltransferase;Dihydroorotase	Cad	sp|B2RQC6|PYR1_MOUSE CAD protein OS=Mus musculus GN=Cad PE=2 SV=1;tr|E9QAI5|E9QAI5_MOUSE CAD protein OS=Mus musculus GN=Cad PE=3 SV=1;tr|G3UWN2|G3UWN2_MOUSE CAD protein OS=Mus musculus GN=Cad PE=3 SV=1;sp|B2RQC6-2|PYR1_MOUSE Isoform 2 of CAD protein OS=Mus	22713000000	20053000000	18422000000	509900000	189280000	167110000	153520000	34771000000	33191000000	31460000000	87	87	87	58.8	58.8	58.8	243.24	0	323.31	61188000000	470	80	74	69	80	74	69	80	74	69	165	158	147
551	B2RQE8;Q9D333	B2RQE8	Rho GTPase-activating protein 42	Arhgap42	sp|B2RQE8|RHG42_MOUSE Rho GTPase-activating protein 42 OS=Mus musculus GN=Arhgap42 PE=1 SV=1	103660000	0	23301000	2188900	1787200	0	401740	166180000	0	53869000	4	4	4	7.7	7.7	7.7	94.635	0	5.3031	126960000	6	4	0	1	4	0	1	4	0	1	5	0	1
552	B2RQG2;Q80U54;Q4FZG1;Q8VCJ7;Q8BU94;A0PJJ1;Q8BLA7	B2RQG2;Q80U54		Phf3	tr|B2RQG2|B2RQG2_MOUSE PHD finger protein 3 OS=Mus musculus GN=Phf3 PE=1 SV=1;tr|Q80U54|Q80U54_MOUSE MKIAA0244 protein (Fragment) OS=Mus musculus GN=Phf3 PE=2 SV=1	383580000	198240000	361640000	8063700	3278500	1694300	3091000	581370000	449360000	584690000	13	13	13	10.1	10.1	10.1	225.54	0	28.853	943460000	30	8	6	12	8	6	12	8	6	12	8	5	17
553	B2RQQ7;Q7TT50;REV__Q7TMV9;REV__Q544E9;REV__P41047;REV__A1Y9B0;F6S522;Q05CL1;D6RI32;Q6DI71;E9Q6J9;REV__F5H8M8;REV__D3Z750;P54265-4;P54265-6;P54265-5;P54265-7;P54265-10;P54265-2;P54265-3;P54265-9;P54265;P54265-8	B2RQQ7;Q7TT50	Non-specific serine/threonine protein kinase;Serine/threonine-protein kinase MRCK beta	Cdc42bpb	tr|B2RQQ7|B2RQQ7_MOUSE CDC42 binding protein kinase beta OS=Mus musculus GN=Cdc42bpb PE=2 SV=1;sp|Q7TT50|MRCKB_MOUSE Serine/threonine-protein kinase MRCK beta OS=Mus musculus GN=Cdc42bpb PE=1 SV=2	1362600000	1263100000	1597000000	44923000	14496000	13437000	16990000	2123200000	2400500000	2484600000	37	37	33	25.6	25.6	23.5	194.73	0	109.61	4222700000	92	24	24	26	24	24	26	22	22	23	29	29	34
554	B2RQQ8;P08122;D3YV27	B2RQQ8;P08122	Collagen alpha-2(IV) chain;Canstatin	Col4a2	tr|B2RQQ8|B2RQQ8_MOUSE Collagen, type IV, alpha 2 OS=Mus musculus GN=Col4a2 PE=2 SV=1;sp|P08122|CO4A2_MOUSE Collagen alpha-2(IV) chain OS=Mus musculus GN=Col4a2 PE=2 SV=4	686350000	884450000	402700000	20995000	7301600	9409100	4284000	1026800000	1314400000	1178300000	11	11	11	10	10	10	167.32	0	27.173	1973500000	31	9	10	6	9	10	6	9	10	6	11	13	7
555	B2RQS1;Q9ERG2;Q3UTR6;Q3TNV4;B3STQ1;B3STQ3;B3STQ2;B3STQ4	B2RQS1;Q9ERG2	Striatin-3	Strn3	tr|B2RQS1|B2RQS1_MOUSE Striatin-3 OS=Mus musculus GN=Strn3 PE=1 SV=1;sp|Q9ERG2|STRN3_MOUSE Striatin-3 OS=Mus musculus GN=Strn3 PE=1 SV=1	2689800000	1860000000	2206300000	241290000	96066000	66430000	78795000	4520900000	3497500000	3312700000	18	15	15	36.4	33.1	33.1	77.731	0	78.618	6756100000	65	15	16	16	12	13	13	12	13	13	18	23	24
556	B2RQV1;Q8BWZ3;Q8BWZ3-2;Q8BKH5;Q8BY54;Q8BKI9;G3UZ51;F6XQZ4	B2RQV1;Q8BWZ3;Q8BWZ3-2	N-alpha-acetyltransferase 25, NatB auxiliary subunit	Naa25	tr|B2RQV1|B2RQV1_MOUSE RIKEN cDNA C330023M02, isoform CRA_a OS=Mus musculus GN=Naa25 PE=2 SV=1;sp|Q8BWZ3|NAA25_MOUSE N-alpha-acetyltransferase 25, NatB auxiliary subunit OS=Mus musculus GN=Naa25 PE=2 SV=1;sp|Q8BWZ3-2|NAA25_MOUSE Isoform 2 of N-alpha-acetyl	1681700000	1264700000	1001200000	73103000	31142000	23420000	18541000	2531500000	2611000000	2415300000	25	25	25	35.2	35.2	35.2	111.71	0	45.967	3947600000	62	16	17	18	16	17	18	16	17	18	21	21	20
557	B2RQW1;Q3U4L9;D3Z4L9;Q61333;G3XA62;G3UWJ7;G3UXC6	B2RQW1;Q3U4L9;D3Z4L9;Q61333	Tumor necrosis factor alpha-induced protein 2	Tnfaip2	tr|B2RQW1|B2RQW1_MOUSE Tumor necrosis factor, alpha-induced protein 2 OS=Mus musculus GN=Tnfaip2 PE=2 SV=1;tr|Q3U4L9|Q3U4L9_MOUSE Putative uncharacterized protein OS=Mus musculus GN=Tnfaip2 PE=2 SV=1;tr|D3Z4L9|D3Z4L9_MOUSE Tumor necrosis factor alpha-induc	161020000	300030000	186080000	16178000	4025500	7500900	4651900	295610000	303250000	371720000	9	9	9	18.2	18.2	18.2	73.671	0	18.956	647130000	16	3	8	4	3	8	4	3	8	4	4	8	4
558	D3YZN4;Q7TNG0;D3YXB7;D3Z1Z1;B2RQY8;Q3ULF4;G3UX97;D3Z342	D3YZN4;Q7TNG0;D3YXB7;D3Z1Z1;B2RQY8;Q3ULF4;G3UX97;D3Z342	Paraplegin	Spg7	tr|D3YZN4|D3YZN4_MOUSE Paraplegin OS=Mus musculus GN=Spg7 PE=1 SV=1;tr|Q7TNG0|Q7TNG0_MOUSE Spg7 protein (Fragment) OS=Mus musculus GN=Spg7 PE=2 SV=1;tr|D3YXB7|D3YXB7_MOUSE Paraplegin OS=Mus musculus GN=Spg7 PE=4 SV=1;tr|D3Z1Z1|D3Z1Z1_MOUSE Paraplegin OS=Mu	354490000	210300000	322990000	21653000	8646200	5129200	7877700	551640000	474950000	621350000	8	8	8	19.5	19.5	19.5	75.002	0	14.629	887780000	21	7	6	6	7	6	6	7	6	6	8	6	7
559	B2RR26;Q8BZW8;Q9CW64;Q8C1S8	B2RR26;Q8BZW8;Q9CW64;Q8C1S8	NHL repeat-containing protein 2	Nhlrc2	tr|B2RR26|B2RR26_MOUSE NHL repeat containing 2 OS=Mus musculus GN=Nhlrc2 PE=2 SV=1;sp|Q8BZW8|NHLC2_MOUSE NHL repeat-containing protein 2 OS=Mus musculus GN=Nhlrc2 PE=2 SV=1;tr|Q9CW64|Q9CW64_MOUSE Putative uncharacterized protein (Fragment) OS=Mus musculus	972540000	532890000	1055900000	82625000	31372000	17190000	34063000	1448300000	1244300000	1729100000	16	16	16	41.8	41.8	41.8	78.429	0	59.799	2561400000	60	13	12	14	13	12	14	13	12	14	19	18	23
560	B7ZNE9;B2RR42;Q499E4-2;Q499E4	B7ZNE9;B2RR42;Q499E4-2;Q499E4	Zinc finger protein DZIP1L	Dzip1l	tr|B7ZNE9|B7ZNE9_MOUSE Dzip1l protein OS=Mus musculus GN=Dzip1l PE=2 SV=1;tr|B2RR42|B2RR42_MOUSE DAZ interacting protein 1-like OS=Mus musculus GN=Dzip1l PE=2 SV=1;sp|Q499E4-2|DZI1L_MOUSE Isoform 2 of Zinc finger protein DZIP1L OS=Mus musculus GN=Dzip1l;sp	33422000	27186000	0	1188400	655330	533050	0	33422000	28370000	0	1	1	1	1.6	1.6	1.6	87.492	0	3.4188	60607000	2	1	1	0	1	1	0	1	1	0	1	1	0
561	E9QNG1;B2RR82;Q9Z0R6;Q80TG5;Q9Z0R6-2;Q3V3Y8;Q3TQ85;Q8CD59	E9QNG1;B2RR82;Q9Z0R6;Q80TG5;Q9Z0R6-2;Q3V3Y8;Q3TQ85	Intersectin-2	Itsn2;mKIAA1256	tr|E9QNG1|E9QNG1_MOUSE Intersectin-2 OS=Mus musculus GN=Itsn2 PE=1 SV=1;tr|B2RR82|B2RR82_MOUSE Itsn2 protein OS=Mus musculus GN=Itsn2 PE=2 SV=1;sp|Q9Z0R6|ITSN2_MOUSE Intersectin-2 OS=Mus musculus GN=Itsn2 PE=1 SV=2;tr|Q80TG5|Q80TG5_MOUSE MKIAA1256 protein	418980000	416110000	491970000	13823000	4364300	4334500	5124700	895910000	827590000	794770000	20	17	17	15	14.3	14.3	188.78	0	39.221	1327100000	41	13	14	14	12	14	12	12	14	12	13	14	14
562	B2RR83;Q3UST9	B2RR83	Probable ATP-dependent RNA helicase YTHDC2	Ythdc2	sp|B2RR83|YTDC2_MOUSE Probable ATP-dependent RNA helicase YTHDC2 OS=Mus musculus GN=Ythdc2 PE=1 SV=1	178470000	320550000	379910000	9765800	1983000	3561700	4221200	505030000	486640000	584100000	21	21	21	19.3	19.3	19.3	161.09	0	44.158	878930000	24	7	12	12	7	12	12	7	12	12	7	10	7
563	B2RRE0;Q9WTQ5;Q9WTQ5-2;Q6IR43	B2RRE0;Q9WTQ5;Q9WTQ5-2	A-kinase anchor protein 12	Akap12	tr|B2RRE0|B2RRE0_MOUSE A kinase (PRKA) anchor protein (Gravin) 12 OS=Mus musculus GN=Akap12 PE=2 SV=1;sp|Q9WTQ5|AKA12_MOUSE A-kinase anchor protein 12 OS=Mus musculus GN=Akap12 PE=1 SV=1;sp|Q9WTQ5-2|AKA12_MOUSE Isoform 2 of A-kinase anchor protein 12 OS=Mu	11372000000	11195000000	9818200000	420590000	147690000	145390000	127510000	14666000000	15000000000	14600000000	50	50	50	53.1	53.1	53.1	180.69	0	323.31	32386000000	236	41	44	41	41	44	41	41	44	41	80	81	75
564	K3W4L0;B2RRE2;E9QAX2;Q9JMH9-4;Q9JMH9-1;Q9JMH9;Q9JMH9-6;E9Q405;Q9JMH9-5;Q9JMH9-7;Q9JMH9-2;E9QA74;Q3UIM4;Q6PER1	K3W4L0;B2RRE2;E9QAX2;Q9JMH9-4;Q9JMH9-1;Q9JMH9;Q9JMH9-6;E9Q405;Q9JMH9-5;Q9JMH9-7;Q9JMH9-2;E9QA74	Unconventional myosin-XVIIIa	Myo18a	tr|K3W4L0|K3W4L0_MOUSE Unconventional myosin-XVIIIa OS=Mus musculus GN=Myo18a PE=1 SV=1;tr|B2RRE2|B2RRE2_MOUSE Myo18a protein OS=Mus musculus GN=Myo18a PE=1 SV=1;tr|E9QAX2|E9QAX2_MOUSE Unconventional myosin-XVIIIa OS=Mus musculus GN=Myo18a PE=1 SV=1;sp|Q9J	1469400000	1369700000	1366300000	30696000	10725000	9997600	9972900	2052700000	1902300000	2198200000	43	43	43	27.2	27.2	27.2	230.99	0	168.43	4205300000	89	35	24	24	35	24	24	35	24	24	36	24	29
565	B2RRE3;H7BX08;Q8C1B1;Q8C1B1-2	B2RRE3;H7BX08;Q8C1B1;Q8C1B1-2	Calmodulin-regulated spectrin-associated protein 2	Camsap2	tr|B2RRE3|B2RRE3_MOUSE Camsap1l1 protein OS=Mus musculus GN=Camsap2 PE=2 SV=1;tr|H7BX08|H7BX08_MOUSE Calmodulin-regulated spectrin-associated protein 2 OS=Mus musculus GN=Camsap2 PE=1 SV=1;sp|Q8C1B1|CAMP2_MOUSE Calmodulin-regulated spectrin-associated prot	354020000	509240000	212950000	12230000	4023000	5786800	2419800	566530000	710420000	575030000	21	21	21	21.6	21.6	21.6	165.66	0	67.8	1076200000	40	12	12	9	12	12	9	12	12	9	15	14	11
566	B2RRE7;G3UXM1;G3UXQ0	B2RRE7	OTU domain-containing protein 4	Otud4	sp|B2RRE7|OTUD4_MOUSE OTU domain-containing protein 4 OS=Mus musculus GN=Otud4 PE=1 SV=1	566650000	809380000	1015800000	44293000	10494000	14989000	18811000	970860000	1103900000	1080800000	21	21	21	29.1	29.1	29.1	123.05	0	73.083	2391800000	45	11	13	18	11	13	18	11	13	18	14	12	19
567	B2RRE8;Q9JLQ0	B2RRE8;Q9JLQ0	CD2-associated protein	Cd2ap	tr|B2RRE8|B2RRE8_MOUSE CD2-associated protein OS=Mus musculus GN=Cd2ap PE=2 SV=1;sp|Q9JLQ0|CD2AP_MOUSE CD2-associated protein OS=Mus musculus GN=Cd2ap PE=1 SV=3	1402000000	1460000000	1171300000	98374000	34195000	35610000	28569000	2519100000	2699200000	2535000000	20	20	20	40.3	40.3	40.3	70.431	0	54.803	4033300000	58	12	16	15	12	16	15	12	16	15	19	22	17
568	B2RRF0;P35822	B2RRF0;P35822	Protein-tyrosine-phosphatase;Receptor-type tyrosine-protein phosphatase kappa	Ptprk	tr|B2RRF0|B2RRF0_MOUSE Ptprk protein OS=Mus musculus GN=Ptprk PE=2 SV=1;sp|P35822|PTPRK_MOUSE Receptor-type tyrosine-protein phosphatase kappa OS=Mus musculus GN=Ptprk PE=1 SV=1	38925000	63171000	31442000	1804600	526020	853660	424890	93026000	95050000	100600000	4	3	3	4.6	3.8	3.8	163	0	6.3521	133540000	6	2	4	3	2	3	2	2	3	2	1	3	2
569	B2RRH9;Q3THK7	B2RRH9;Q3THK7	GMP synthase [glutamine-hydrolyzing]	Gmps	tr|B2RRH9|B2RRH9_MOUSE Guanine monphosphate synthetase OS=Mus musculus GN=Gmps PE=2 SV=1;sp|Q3THK7|GUAA_MOUSE GMP synthase [glutamine-hydrolyzing] OS=Mus musculus GN=Gmps PE=1 SV=2	10486000000	8335600000	8290900000	553320000	214010000	170110000	169200000	14087000000	12830000000	12743000000	37	37	37	66.5	66.5	66.5	76.723	0	312.77	27113000000	188	33	33	33	33	33	33	33	33	33	65	60	63
570	B2RRI2;Q689Z5;Q689Z5-2;Q3TMM7;I6L981;Q3UPW9;A0JLU6;Q7TNB8-2;Q7TNB8;Q7TNB8-3;Q8R594	B2RRI2;Q689Z5;Q689Z5-2;Q3TMM7;I6L981	Protein strawberry notch homolog 1	Sbno1	tr|B2RRI2|B2RRI2_MOUSE Protein strawberry notch homolog 1 OS=Mus musculus GN=Sbno1 PE=2 SV=1;sp|Q689Z5|SBNO1_MOUSE Protein strawberry notch homolog 1 OS=Mus musculus GN=Sbno1 PE=1 SV=2;sp|Q689Z5-2|SBNO1_MOUSE Isoform 2 of Protein strawberry notch homolog 1	879060000	698700000	991560000	33807000	11567000	9193400	13047000	1471200000	1430800000	1597200000	28	28	28	31.5	31.5	31.5	153.92	0	68.575	2569300000	56	18	19	19	18	19	19	18	19	19	18	20	18
571	B2RRM5;Q3V009;Q05DM6;Q3V009-2	B2RRM5;Q3V009;Q05DM6;Q3V009-2	Transmembrane emp24 domain-containing protein 1	Tmed1	tr|B2RRM5|B2RRM5_MOUSE Transmembrane emp24 domain containing 1 OS=Mus musculus GN=Tmed1 PE=2 SV=1;sp|Q3V009|TMED1_MOUSE Transmembrane emp24 domain-containing protein 1 OS=Mus musculus GN=Tmed1 PE=2 SV=1;tr|Q05DM6|Q05DM6_MOUSE Tmed1 protein OS=Mus musculus	488730000	269710000	312590000	178510000	81455000	44952000	52098000	383130000	456810000	574900000	3	3	3	17.2	17.2	17.2	25.262	0	13.008	1071000000	9	3	2	2	3	2	2	3	2	2	4	2	3
572	B2RRP1;Q99MS8	B2RRP1;Q99MS8	Tubulin polyglutamylase complex subunit 1	Tpgs1	tr|B2RRP1|B2RRP1_MOUSE Gene trap ROSA b-geo 22 OS=Mus musculus GN=Tpgs1 PE=2 SV=1;sp|Q99MS8|TPGS1_MOUSE Tubulin polyglutamylase complex subunit 1 OS=Mus musculus GN=Tpgs1 PE=1 SV=1	90708000	211000000	45704000	17371000	4535400	10550000	2285200	136690000	405600000	164890000	6	6	6	34.7	34.7	34.7	32.625	0	6.14	347410000	12	5	2	4	5	2	4	5	2	4	5	3	4
573	Q925H0-2;B2RRQ1	Q925H0-2;B2RRQ1		Asic2	sp|Q925H0-2|ASIC2_MOUSE Isoform 2 of Acid-sensing ion channel 2 OS=Mus musculus GN=Asic2;tr|B2RRQ1|B2RRQ1_MOUSE Amiloride-sensitive cation channel 1, neuronal (Degenerin) OS=Mus musculus GN=Asic2 PE=2 SV=1	0	0	0	0	0	0	0	0	0	0	1	1	1	2.8	2.8	2.8	63.204	1	-2	0	0	1	0	0	1	0	0	1	0	0	0	0	0
574	B2RRR9;Q8BHC9	B2RRR9;Q8BHC9	Alpha-(1,3)-fucosyltransferase 11	Fut11	tr|B2RRR9|B2RRR9_MOUSE Fucosyltransferase 11 OS=Mus musculus GN=Fut11 PE=2 SV=1;sp|Q8BHC9|FUT11_MOUSE Alpha-(1,3)-fucosyltransferase 11 OS=Mus musculus GN=Fut11 PE=1 SV=1	178420000	140670000	186940000	17449000	6152300	4850700	6446100	328160000	383000000	430030000	6	6	6	14.7	14.7	14.7	55.532	0	24.702	506020000	12	4	3	5	4	3	5	4	3	5	3	4	5
575	B2RRS4;E9PWV7;Q923K4;D6RDC6;Q923K4-2	B2RRS4;E9PWV7;Q923K4;D6RDC6;Q923K4-2	tRNA modification GTPase GTPBP3, mitochondrial	Gtpbp3	tr|B2RRS4|B2RRS4_MOUSE GTP binding protein 3 OS=Mus musculus GN=Gtpbp3 PE=2 SV=1;tr|E9PWV7|E9PWV7_MOUSE tRNA modification GTPase GTPBP3, mitochondrial OS=Mus musculus GN=Gtpbp3 PE=3 SV=1;sp|Q923K4|GTPB3_MOUSE tRNA modification GTPase GTPBP3, mitochondrial	220310000	18986000	46720000	13001000	10014000	863000	2123600	169410000	160260000	166310000	4	4	4	12.4	12.4	12.4	52.175	0	6.6576	286020000	6	3	1	2	3	1	2	3	1	2	3	1	2
576	D3Z4U0;B2RRT9;D3Z4T9;Q9R020;E9PUD0;Q9R020-2;V9GX51	D3Z4U0;B2RRT9;D3Z4T9;Q9R020;E9PUD0;Q9R020-2	Zinc finger Ran-binding domain-containing protein 2	Zranb2	tr|D3Z4U0|D3Z4U0_MOUSE Zinc finger Ran-binding domain-containing protein 2 OS=Mus musculus GN=Zranb2 PE=1 SV=1;tr|B2RRT9|B2RRT9_MOUSE Zinc finger Ran-binding domain-containing protein 2 OS=Mus musculus GN=Zranb2 PE=2 SV=1;tr|D3Z4T9|D3Z4T9_MOUSE Zinc finger	397960000	433080000	485240000	62680000	18950000	20623000	23107000	734830000	814220000	772050000	6	6	6	20.6	20.6	20.6	37.294	0	9.5029	1316300000	17	4	5	4	4	5	4	4	5	4	5	5	7
577	B2RRW5;Q8CEF1	B2RRW5;Q8CEF1	Protein fem-1 homolog C	Fem1c	tr|B2RRW5|B2RRW5_MOUSE Fem-1 homolog c (C.elegans) OS=Mus musculus GN=Fem1c PE=2 SV=1;sp|Q8CEF1|FEM1C_MOUSE Protein fem-1 homolog C OS=Mus musculus GN=Fem1c PE=2 SV=1	8510100	8550100	0	473890	236390	237500	0	24085000	19171000	0	1	1	1	2.3	2.3	2.3	68.578	0.0011901	2.3306	17060000	2	1	1	0	1	1	0	1	1	0	1	1	0
578	Q3UAF7;Q3UAF6;Q3U5R4;B2RRX1;P60710;Q3UA89;Q3UGS0;Q3UAA9;Q3U939;Q3U804;Q61276;Q3TIJ9;Q3UCF8;E9Q1F2;G3UZ07;A1E281;E9Q606;Q99NC5;E9Q2D1;Q6IWE2;F8WGM8;F6WX90;Q7M0E4;Q8CF71;Q6GQT3;E9Q3M9	Q3UAF7;Q3UAF6;Q3U5R4;B2RRX1;P60710;Q3UA89;Q3UGS0;Q3UAA9;Q3U939;Q3U804;Q61276;Q3TIJ9;Q3UCF8;E9Q1F2;G3UZ07	Actin, cytoplasmic 1;Actin, cytoplasmic 1, N-terminally processed	Actb;Actg1	tr|Q3UAF7|Q3UAF7_MOUSE Putative uncharacterized protein OS=Mus musculus GN=Actb PE=2 SV=1;tr|Q3UAF6|Q3UAF6_MOUSE Putative uncharacterized protein OS=Mus musculus GN=Actb PE=2 SV=1;tr|Q3U5R4|Q3U5R4_MOUSE Putative uncharacterized protein OS=Mus musculus GN=A	31528000	27572000	22496000	3547600	1370800	1198800	978070	31528000	28774000	23740000	24	2	0	71.5	4.8	0	41.75	0	54.811	81595000	3	23	24	24	2	2	2	0	0	0	1	1	1
579	B2RRX2;P63328-2;P63328;Q4V9X0;Q8C649;Q9D5R5;Q3V074;Q80XK0;P48455	B2RRX2;P63328-2;P63328;Q4V9X0	Serine/threonine-protein phosphatase;Serine/threonine-protein phosphatase 2B catalytic subunit alpha isoform	Ppp3ca	tr|B2RRX2|B2RRX2_MOUSE Serine/threonine-protein phosphatase OS=Mus musculus GN=Ppp3ca PE=2 SV=1;sp|P63328-2|PP2BA_MOUSE Isoform 2 of Serine/threonine-protein phosphatase 2B catalytic subunit alpha isoform OS=Mus musculus GN=Ppp3ca;sp|P63328|PP2BA_MOUSE Ser	1565600000	1521800000	1257100000	160910000	57985000	56364000	46560000	2665800000	2495800000	2244400000	12	12	7	34	34	21.5	58.643	0	36.993	4344500000	47	9	10	11	9	10	11	4	5	6	17	15	15
580	B2RRY4;Q9JLB2	B2RRY4;Q9JLB2	MAGUK p55 subfamily member 5	Mpp5	tr|B2RRY4|B2RRY4_MOUSE Membrane protein, palmitoylated 5 (MAGUK p55 subfamily member 5) OS=Mus musculus GN=Mpp5 PE=2 SV=1;sp|Q9JLB2|MPP5_MOUSE MAGUK p55 subfamily member 5 OS=Mus musculus GN=Mpp5 PE=1 SV=1	27344000	68185000	38191000	3261500	666940	1663100	931490	99934000	40366000	67154000	5	5	5	10.4	10.4	10.4	77.229	0	10.23	133720000	7	2	4	2	2	4	2	2	4	2	2	3	2
581	B2RRZ7;Q3U0V2;I6L995;D6RCI0;D6RGL2	B2RRZ7;Q3U0V2	Tumor necrosis factor receptor type 1-associated DEATH domain protein	Tradd	tr|B2RRZ7|B2RRZ7_MOUSE TNFRSF1A-associated via death domain OS=Mus musculus GN=Tradd PE=2 SV=1;sp|Q3U0V2|TRADD_MOUSE Tumor necrosis factor receptor type 1-associated DEATH domain protein OS=Mus musculus GN=Tradd PE=1 SV=1	243100000	464110000	182590000	49434000	13506000	25784000	10144000	422670000	377880000	432280000	10	10	10	45.2	45.2	45.2	34.577	0	47.339	889810000	21	6	7	4	6	7	4	6	7	4	6	9	6
582	B2RS09;Q7JJ13;Q7JJ13-2;U3KLT0;I7HPW1;G3UZR9;Q3TH63;S4R1Z1	B2RS09;Q7JJ13;Q7JJ13-2;U3KLT0;I7HPW1	Bromodomain-containing protein 2	Brd2	tr|B2RS09|B2RS09_MOUSE Bromodomain containing 2 OS=Mus musculus GN=Brd2 PE=2 SV=1;sp|Q7JJ13|BRD2_MOUSE Bromodomain-containing protein 2 OS=Mus musculus GN=Brd2 PE=1 SV=1;sp|Q7JJ13-2|BRD2_MOUSE Isoform 2 of Bromodomain-containing protein 2 OS=Mus musculus G	727370000	730080000	926420000	64429000	19659000	19732000	25038000	1450600000	1436700000	1381500000	19	17	16	31.8	29.2	28.1	88.066	0	51.128	2383900000	50	15	13	14	14	11	13	13	11	12	15	18	17
583	Q8C4Y1;B2RS19;P28574	Q8C4Y1;B2RS19;P28574	Protein max	Max	tr|Q8C4Y1|Q8C4Y1_MOUSE Max protein OS=Mus musculus GN=Max PE=2 SV=1;tr|B2RS19|B2RS19_MOUSE Max protein OS=Mus musculus GN=Max PE=2 SV=1;sp|P28574|MAX_MOUSE Protein max OS=Mus musculus GN=Max PE=1 SV=1	65472000	121710000	124940000	31213000	6547200	12171000	12494000	90009000	140630000	151130000	3	3	3	29.1	29.1	29.1	17.171	0	8.2137	312130000	6	2	2	2	2	2	2	2	2	2	2	1	3
584	Q3TMB5;B2RS30;Q9Z1Y4	Q3TMB5;B2RS30;Q9Z1Y4	Thyroid receptor-interacting protein 6	Trip6	tr|Q3TMB5|Q3TMB5_MOUSE Putative uncharacterized protein OS=Mus musculus GN=Trip6 PE=2 SV=1;tr|B2RS30|B2RS30_MOUSE Thyroid hormone receptor interactor 6 OS=Mus musculus GN=Trip6 PE=2 SV=1;sp|Q9Z1Y4|TRIP6_MOUSE Thyroid receptor-interacting protein 6 OS=Mus m	422090000	260340000	437230000	39988000	15075000	9297700	15615000	658510000	559670000	582060000	11	11	11	40.2	40.2	40.2	50.73	0	54.161	1119700000	25	7	6	9	7	6	9	7	6	9	7	7	11
585	B2RS36;Q5EE38;Q5EE38-2;Q5EE38-5;Q5EE38-4;Q5EE38-3	B2RS36;Q5EE38;Q5EE38-2	Adrenocortical dysplasia protein	Acd	tr|B2RS36|B2RS36_MOUSE Adrenocortical dysplasia OS=Mus musculus GN=Acd PE=2 SV=1;sp|Q5EE38|ACD_MOUSE Adrenocortical dysplasia protein OS=Mus musculus GN=Acd PE=1 SV=1;sp|Q5EE38-2|ACD_MOUSE Isoform 2 of Adrenocortical dysplasia protein OS=Mus musculus GN=Ac	68249000	0	34290000	5126900	3412400	0	1714500	75806000	0	76669000	4	4	4	16.8	16.8	16.8	44.713	0.0001543	2.8386	102540000	4	3	0	2	3	0	2	3	0	2	2	0	2
586	B2RS41;Q8BWF0	B2RS41;Q8BWF0	Succinate-semialdehyde dehydrogenase, mitochondrial	Aldh5a1	tr|B2RS41|B2RS41_MOUSE Aldhehyde dehydrogenase family 5, subfamily A1 OS=Mus musculus GN=Aldh5a1 PE=2 SV=1;sp|Q8BWF0|SSDH_MOUSE Succinate-semialdehyde dehydrogenase, mitochondrial OS=Mus musculus GN=Aldh5a1 PE=1 SV=1	681500000	885150000	656770000	69482000	21297000	27661000	20524000	1641800000	1483900000	1371400000	10	10	10	30	30	30	55.968	0	38.274	2223400000	35	8	8	10	8	8	10	8	8	10	13	9	13
587	B2RS43;Q9Z1R4	B2RS43;Q9Z1R4	Uncharacterized protein C6orf47 homolog	D17H6S53E;D17h6s53e	tr|B2RS43|B2RS43_MOUSE DNA segment, Chr 17, human D6S53E OS=Mus musculus GN=D17H6S53E PE=2 SV=1;sp|Q9Z1R4|CF047_MOUSE Uncharacterized protein C6orf47 homolog OS=Mus musculus GN=D17h6s53e PE=2 SV=1	0	20129000	56101000	6352400	0	1677400	4675100	0	93309000	95012000	2	2	2	8.2	8.2	8.2	32.014	0	4.1161	76229000	3	0	1	2	0	1	2	0	1	2	0	1	2
588	B2RS85;Q9QXV8	B2RS85;Q9QXV8	Protein sprouty homolog 2	Spry2	tr|B2RS85|B2RS85_MOUSE Sprouty homolog 2 (Drosophila) OS=Mus musculus GN=Spry2 PE=2 SV=1;sp|Q9QXV8|SPY2_MOUSE Protein sprouty homolog 2 OS=Mus musculus GN=Spry2 PE=2 SV=1	142030000	118640000	78575000	16962000	7101300	5931800	3928700	301610000	226040000	316630000	3	3	3	15.2	15.2	15.2	34.623	0	6.8716	339240000	5	2	3	1	2	3	1	2	3	1	2	2	1
589	B2RS91	B2RS91	RNA polymerase I-specific transcription initiation factor RRN3	Rrn3	sp|B2RS91|RRN3_MOUSE RNA polymerase I-specific transcription initiation factor RRN3 OS=Mus musculus GN=Rrn3 PE=1 SV=1	105210000	78557000	33987000	5443900	2630300	1963900	849680	171580000	118380000	81247000	6	6	6	10.2	10.2	10.2	74.517	0	9.7635	217760000	10	5	4	2	5	4	2	5	4	2	4	4	2
590	B2RSC8;P46935;Q3TUU1;V9GWV8;Q3V335;A0JNZ0;Q8BNU7;V9GXS6	B2RSC8;P46935	E3 ubiquitin-protein ligase NEDD4	Nedd4	tr|B2RSC8|B2RSC8_MOUSE E3 ubiquitin-protein ligase OS=Mus musculus GN=Nedd4 PE=2 SV=1;sp|P46935|NEDD4_MOUSE E3 ubiquitin-protein ligase NEDD4 OS=Mus musculus GN=Nedd4 PE=1 SV=3	14621000000	14202000000	14352000000	938580000	317850000	308740000	311990000	20872000000	21129000000	21036000000	39	34	29	52.6	46.6	41	102.71	0	307.75	43175000000	208	36	36	33	32	31	31	27	26	26	59	70	79
591	E9Q4A5;B2RSE6;Q3TL26	E9Q4A5;B2RSE6;Q3TL26	Dimethyladenosine transferase 2, mitochondrial	Gm1818;Tfb2m	tr|E9Q4A5|E9Q4A5_MOUSE Protein Gm1818 OS=Mus musculus GN=Gm1818 PE=4 SV=1;tr|B2RSE6|B2RSE6_MOUSE Transcription factor B2, mitochondrial OS=Mus musculus GN=Tfb2m PE=2 SV=1;sp|Q3TL26|TFB2M_MOUSE Dimethyladenosine transferase 2, mitochondrial OS=Mus musculus	120860000	111800000	62833000	11365000	4648600	4300000	2416700	180560000	223040000	237430000	4	4	4	15.9	15.9	15.9	45.862	0	9.1716	295500000	9	4	3	2	4	3	2	4	3	2	4	3	2
592	Q8CBQ2;B2RSH3;Q08091-2;Q08091	Q8CBQ2;B2RSH3;Q08091-2;Q08091	Calponin;Calponin-1	Cnn1	tr|Q8CBQ2|Q8CBQ2_MOUSE Putative uncharacterized protein OS=Mus musculus GN=Cnn1 PE=2 SV=1;tr|B2RSH3|B2RSH3_MOUSE Calponin 1 OS=Mus musculus GN=Cnn1 PE=2 SV=1;sp|Q08091-2|CNN1_MOUSE Isoform Beta of Calponin-1 OS=Mus musculus GN=Cnn1;sp|Q08091|CNN1_MOUSE Cal	0	0	0	0	0	0	0	0	0	0	1	1	1	4.7	4.7	4.7	33.403	1	-2	0	0	0	1	0	0	1	0	0	1	0	0	0	0
593	B2RSN3;Q9CWF2;Q99J49;G3UZR1;Q62363	B2RSN3;Q9CWF2;Q99J49	Tubulin beta-2B chain	Tubb2b;Tubb2a	tr|B2RSN3|B2RSN3_MOUSE MCG1395 OS=Mus musculus GN=Tubb2b PE=2 SV=1;sp|Q9CWF2|TBB2B_MOUSE Tubulin beta-2B chain OS=Mus musculus GN=Tubb2b PE=1 SV=1;tr|Q99J49|Q99J49_MOUSE Tubb2a protein (Fragment) OS=Mus musculus GN=Tubb2a PE=2 SV=1	10322000000	10681000000	11016000000	1455400000	469170000	485510000	500740000	17987000000	14569000000	15650000000	26	6	1	77.5	21.6	2.7	49.953	0	94.236	32019000000	100	26	25	26	6	6	6	1	1	1	32	30	38
594	B7ZNW3;B2RSR2;Q8BH47	B7ZNW3;B2RSR2;Q8BH47	Vesicle-trafficking protein SEC22a	Sec22a	tr|B7ZNW3|B7ZNW3_MOUSE Sec22a protein OS=Mus musculus GN=Sec22a PE=2 SV=1;tr|B2RSR2|B2RSR2_MOUSE SEC22 vesicle trafficking protein homologe A (S. cerevisiae) OS=Mus musculus GN=Sec22a PE=2 SV=1;sp|Q8BH47|SC22A_MOUSE Vesicle-trafficking protein SEC22a OS=Mu	9619700	0	0	687120	687120	0	0	22154000	0	0	2	2	2	12.3	12.3	12.3	32.618	0	3.8179	9619700	0	2	1	0	2	1	0	2	1	0	0	0	0
595	B2RSR7;Q3ULJ0;Q3ULJ0-2;D3Z0L6;E0CXN5;P13707	B2RSR7;Q3ULJ0;Q3ULJ0-2	Glycerol-3-phosphate dehydrogenase [NAD(+)];Glycerol-3-phosphate dehydrogenase 1-like protein	Gpd1l	tr|B2RSR7|B2RSR7_MOUSE Glycerol-3-phosphate dehydrogenase 1-like OS=Mus musculus GN=Gpd1l PE=2 SV=1;sp|Q3ULJ0|GPD1L_MOUSE Glycerol-3-phosphate dehydrogenase 1-like protein OS=Mus musculus GN=Gpd1l PE=1 SV=2;sp|Q3ULJ0-2|GPD1L_MOUSE Isoform 2 of Glycerol-3-p	847830000	415520000	446460000	65762000	32609000	15982000	17172000	956300000	899080000	927020000	11	11	11	44.7	44.7	44.7	38.225	0	34.883	1709800000	31	7	9	10	7	9	10	7	9	10	11	11	9
596	B2RSU4;Q80V62;Q3U202;Q3UQJ0;Q3TLN3;F7CAP1;Q80V62-2	B2RSU4;Q80V62;Q3U202;Q3UQJ0;Q3TLN3	Fanconi anemia group D2 protein homolog	Fancd2	tr|B2RSU4|B2RSU4_MOUSE Fanconi anemia, complementation group D2 OS=Mus musculus GN=Fancd2 PE=2 SV=1;sp|Q80V62|FACD2_MOUSE Fanconi anemia group D2 protein homolog OS=Mus musculus GN=Fancd2 PE=1 SV=2;tr|Q3U202|Q3U202_MOUSE Putative uncharacterized protein (F	233470000	298330000	320240000	10785000	2955300	3776300	4053700	387350000	471070000	508620000	14	14	14	13.4	13.4	13.4	163.62	0	26.359	852050000	34	10	10	11	10	10	11	10	10	11	11	11	12
597	E9PY46;B2RSU5;Q6ZQ91;Q2XQY6;E9Q682;Q3TQ94;Q6RUU2;Q3TA81;Q91VU5;E9Q925	E9PY46;B2RSU5;Q6ZQ91;Q2XQY6;E9Q682;Q3TQ94		Ift140	tr|E9PY46|E9PY46_MOUSE Protein Ift140 OS=Mus musculus GN=Ift140 PE=4 SV=1;tr|B2RSU5|B2RSU5_MOUSE Intraflagellar transport 140 homolog (Chlamydomonas) OS=Mus musculus GN=Ift140 PE=2 SV=1;tr|Q6ZQ91|Q6ZQ91_MOUSE MKIAA0590 protein (Fragment) OS=Mus musculus GN	350790000	231860000	380380000	11069000	4032000	2665000	4372200	412140000	451770000	536670000	17	17	17	15.4	15.4	15.4	165.87	0	25.571	963030000	31	10	11	12	10	11	12	10	11	12	10	10	11
598	E9PWI6;B2RSU7;Q8CHG3;E0CYI9;Q3UFV3;Q6P0A4;E0CY89	E9PWI6;B2RSU7;Q8CHG3;E0CYI9	GRIP and coiled-coil domain-containing protein 2	Gcc2	tr|E9PWI6|E9PWI6_MOUSE GRIP and coiled-coil domain-containing protein 2 OS=Mus musculus GN=Gcc2 PE=4 SV=1;tr|B2RSU7|B2RSU7_MOUSE GRIP and coiled-coil domain containing 2 OS=Mus musculus GN=Gcc2 PE=2 SV=1;sp|Q8CHG3|GCC2_MOUSE GRIP and coiled-coil domain-con	740010000	442320000	2950600000	33064000	5920100	3538600	23605000	1517800000	1552200000	1630600000	20	20	20	15.3	15.3	15.3	190.73	0	58.531	4133000000	37	13	15	11	13	15	11	13	15	11	11	13	13
599	B2RSV4;Q921M3;Q921M3-2	B2RSV4;Q921M3;Q921M3-2	Splicing factor 3B subunit 3	Sf3b3	tr|B2RSV4|B2RSV4_MOUSE Splicing factor 3b, subunit 3 OS=Mus musculus GN=Sf3b3 PE=2 SV=1;sp|Q921M3|SF3B3_MOUSE Splicing factor 3B subunit 3 OS=Mus musculus GN=Sf3b3 PE=2 SV=1;sp|Q921M3-2|SF3B3_MOUSE Isoform 2 of Splicing factor 3B subunit 3 OS=Mus musculus	17003000000	14966000000	14173000000	769030000	283380000	249440000	236210000	27113000000	27202000000	26703000000	40	40	40	47.2	47.2	47.2	135.55	0	301.18	46142000000	286	38	37	38	38	37	38	38	37	38	94	93	99
600	B2RSW8;Q9R0L6;Q9R0L6-2	B2RSW8;Q9R0L6;Q9R0L6-2	Pericentriolar material 1 protein	Pcm1	tr|B2RSW8|B2RSW8_MOUSE Pericentriolar material 1 OS=Mus musculus GN=Pcm1 PE=2 SV=1;sp|Q9R0L6|PCM1_MOUSE Pericentriolar material 1 protein OS=Mus musculus GN=Pcm1 PE=1 SV=2;sp|Q9R0L6-2|PCM1_MOUSE Isoform 2 of Pericentriolar material 1 protein OS=Mus musculu	1531600000	995710000	819730000	32496000	14870000	9667100	7958600	2081000000	1847900000	1976400000	26	26	26	17.1	17.1	17.1	228.83	0	87.697	3347100000	77	22	21	15	22	21	15	22	21	15	32	24	21
601	B2RT41;Q6A049;Q6P7T8;Q8K082;Q3TTC3	B2RT41;Q6A049;Q6P7T8		Zfc3h1	tr|B2RT41|B2RT41_MOUSE Protein Zfc3h1 OS=Mus musculus GN=Zfc3h1 PE=2 SV=1;tr|Q6A049|Q6A049_MOUSE MKIAA0546 protein (Fragment) OS=Mus musculus GN=Zfc3h1 PE=2 SV=1;tr|Q6P7T8|Q6P7T8_MOUSE Zfc3h1 protein (Fragment) OS=Mus musculus GN=Zfc3h1 PE=2 SV=1	108810000	67166000	102510000	2578600	1007500	621910	949190	143140000	107870000	282600000	6	6	6	3.4	3.4	3.4	225.05	0	8.0995	278490000	12	4	4	2	4	4	2	4	4	2	5	5	2
602	B2RT77;Q78WZ7	B2RT77;Q78WZ7	DNA-directed RNA polymerase I subunit RPA43	Twistnb	tr|B2RT77|B2RT77_MOUSE TWIST neighbor OS=Mus musculus GN=Twistnb PE=2 SV=1;sp|Q78WZ7|RPA43_MOUSE DNA-directed RNA polymerase I subunit RPA43 OS=Mus musculus GN=Twistnb PE=1 SV=1	279630000	322410000	137280000	52808000	19974000	23029000	9805500	523570000	464330000	366290000	4	4	4	17	17	17	36.721	0	21.451	739320000	13	3	4	3	3	4	3	3	4	3	5	5	3
603	B2RT97;Q9WVJ2;E9Q5I9;E9Q0U1;F6ZQQ3;F6PXS6;E9PY93	B2RT97;Q9WVJ2;E9Q5I9	26S proteasome non-ATPase regulatory subunit 13	Psmd13	tr|B2RT97|B2RT97_MOUSE Proteasome (Prosome, macropain) 26S subunit, non-ATPase, 13 OS=Mus musculus GN=Psmd13 PE=2 SV=1;sp|Q9WVJ2|PSD13_MOUSE 26S proteasome non-ATPase regulatory subunit 13 OS=Mus musculus GN=Psmd13 PE=1 SV=1;tr|E9Q5I9|E9Q5I9_MOUSE 26S prot	10374000000	9132400000	10842000000	1167300000	399010000	351250000	417010000	15280000000	14356000000	14360000000	25	25	25	71.8	71.8	71.8	42.809	0	168.6	30349000000	111	23	20	20	23	20	20	23	20	20	36	34	41
604	B2RTB0;Q3UHX2;Q1WWJ8	B2RTB0;Q3UHX2;Q1WWJ8	28 kDa heat- and acid-stable phosphoprotein	Pdap1	tr|B2RTB0|B2RTB0_MOUSE MCG17262 OS=Mus musculus GN=Pdap1 PE=2 SV=1;sp|Q3UHX2|HAP28_MOUSE 28 kDa heat- and acid-stable phosphoprotein OS=Mus musculus GN=Pdap1 PE=1 SV=1;tr|Q1WWJ8|Q1WWJ8_MOUSE Pdap1 protein (Fragment) OS=Mus musculus GN=Pdap1 PE=2 SV=1	4107500000	2923700000	3674000000	1189500000	456390000	324860000	408220000	3806900000	4116000000	4330100000	10	10	10	39.2	39.2	39.2	20.605	0	45.109	10705000000	59	10	9	10	10	9	10	10	9	10	25	18	16
605	B2RTC8;Q3V132	B2RTC8;Q3V132	ADP/ATP translocase 4;ADP/ATP translocase 4, N-terminally processed	Slc25a31	tr|B2RTC8|B2RTC8_MOUSE Solute carrier family 25 (Mitochondrial carrier adenine nucleotide translocator), member 31 OS=Mus musculus GN=Slc25a31 PE=2 SV=1;sp|Q3V132|ADT4_MOUSE ADP/ATP translocase 4 OS=Mus musculus GN=Slc25a31 PE=2 SV=1	0	0	0	0	0	0	0	0	0	0	4	1	1	10.9	2.2	2.2	35.257	1	-2	0	1	4	3	3	1	0	0	1	0	0	1	0	0
606	B2RTE3;Q4FK66;Q4FK66-2	B2RTE3;Q4FK66	Pre-mRNA-splicing factor 38A	Prpf38a	tr|B2RTE3|B2RTE3_MOUSE MCG17981 OS=Mus musculus GN=Prpf38a PE=2 SV=1;sp|Q4FK66|PR38A_MOUSE Pre-mRNA-splicing factor 38A OS=Mus musculus GN=Prpf38a PE=1 SV=1	1269500000	1087400000	956930000	220920000	84633000	72493000	63795000	1762900000	1371500000	1194500000	10	10	10	28.5	28.5	28.5	37.436	0	31.411	3313800000	30	7	8	8	7	8	8	7	8	8	10	11	9
607	J3QQ10;B2RTG9;Q9D011	J3QQ10;B2RTG9;Q9D011	M-phase-specific PLK1-interacting protein	Gm7102;Mplkip	tr|J3QQ10|J3QQ10_MOUSE Protein Gm7102 OS=Mus musculus GN=Gm7102 PE=4 SV=1;tr|B2RTG9|B2RTG9_MOUSE RIKEN cDNA 2810021B07 OS=Mus musculus GN=Mplkip PE=2 SV=1;sp|Q9D011|MPLKI_MOUSE M-phase-specific PLK1-interacting protein OS=Mus musculus GN=Mplkip PE=2 SV=1	20277000	30141000	28922000	9917600	2534700	3767600	3615300	35142000	73710000	64639000	1	1	1	14	14	14	19.539	0	3.6139	79341000	5	1	1	1	1	1	1	1	1	1	1	1	3
608	Q3UEU2;B2RTJ8;O35710-2;O35710	Q3UEU2;B2RTJ8;O35710-2;O35710	Nocturnin	Ccrn4l	tr|Q3UEU2|Q3UEU2_MOUSE Putative uncharacterized protein OS=Mus musculus GN=Ccrn4l PE=2 SV=1;tr|B2RTJ8|B2RTJ8_MOUSE CCR4 carbon catabolite repression 4-like (S. cerevisiae) OS=Mus musculus GN=Ccrn4l PE=2 SV=1;sp|O35710-2|NOCT_MOUSE Isoform 2 of Nocturnin OS	464590000	390080000	337430000	41107000	16021000	13451000	11636000	710870000	744600000	651210000	11	11	10	32.4	32.4	31	48.27	0	86.774	1192100000	34	10	10	9	10	10	9	9	9	8	11	11	12
609	B2RTM0;P62806;Q61667;Q6B822	B2RTM0;P62806;Q61667	Histone H4	Hist2h4;Hist1h4a	tr|B2RTM0|B2RTM0_MOUSE Histone H4 OS=Mus musculus GN=Hist2h4 PE=2 SV=1;sp|P62806|H4_MOUSE Histone H4 OS=Mus musculus GN=Hist1h4a PE=1 SV=2;tr|Q61667|Q61667_MOUSE Histone H4 (Fragment) OS=Mus musculus PE=3 SV=1	269490000000	255320000000	237630000000	127070000000	44915000000	42553000000	39606000000	332040000000	295470000000	309730000000	12	12	12	60.2	60.2	60.2	11.367	0	130.54	762440000000	1060	12	12	11	12	12	11	12	12	11	342	367	351
610	B2RTN5;Q91YM2;Q3TSU7;Q3UVZ8;Q5U612	B2RTN5;Q91YM2;Q3TSU7	Rho GTPase-activating protein 35	Arhgap35	tr|B2RTN5|B2RTN5_MOUSE Glucocorticoid receptor DNA binding factor 1 OS=Mus musculus GN=Arhgap35 PE=2 SV=1;sp|Q91YM2|RHG35_MOUSE Rho GTPase-activating protein 35 OS=Mus musculus GN=Arhgap35 PE=1 SV=3;tr|Q3TSU7|Q3TSU7_MOUSE Putative uncharacterized protein (	520180000	488290000	408760000	15747000	5779800	5425500	4541700	851030000	786510000	875350000	14	14	14	14.3	14.3	14.3	170.39	0	37.902	1417200000	38	12	12	12	12	12	12	12	12	12	13	12	13
611	F8WHL1;B2RU82;Q5IRJ6;Q5IRJ6-2	F8WHL1;B2RU82;Q5IRJ6;Q5IRJ6-2	Zinc transporter 9	Slc30a9	tr|F8WHL1|F8WHL1_MOUSE Zinc transporter 9 OS=Mus musculus GN=Slc30a9 PE=4 SV=1;tr|B2RU82|B2RU82_MOUSE Solute carrier family 30 (Zinc transporter), member 9 OS=Mus musculus GN=Slc30a9 PE=2 SV=1;sp|Q5IRJ6|ZNT9_MOUSE Zinc transporter 9 OS=Mus musculus GN=Slc3	198640000	50863000	114180000	12989000	7094300	1816500	4077900	152970000	126690000	135690000	6	6	6	13.3	13.3	13.3	60.674	0	22.269	363690000	11	5	2	5	5	2	5	5	2	5	4	2	5
612	B2RU91;Q8BUY9;Q05BF8	B2RU91;Q8BUY9;Q05BF8	Geranylgeranyl transferase type-1 subunit beta	Pggt1b	tr|B2RU91|B2RU91_MOUSE Protein geranylgeranyltransferase type I, beta subunit OS=Mus musculus GN=Pggt1b PE=2 SV=1;sp|Q8BUY9|PGTB1_MOUSE Geranylgeranyl transferase type-1 subunit beta OS=Mus musculus GN=Pggt1b PE=2 SV=1;tr|Q05BF8|Q05BF8_MOUSE Pggt1b protein	88213000	121200000	118100000	15596000	4200600	5771200	5623900	264890000	255590000	276370000	4	4	4	14.1	14.1	14.1	42.324	0	4.4902	327510000	15	3	3	3	3	3	3	3	3	3	6	4	5
613	B2RUA5;Q7TSI3;Q8BNQ1	B2RUA5;Q7TSI3;Q8BNQ1	Serine/threonine-protein phosphatase 6 regulatory subunit 1	Ppp6r1	tr|B2RUA5|B2RUA5_MOUSE SAPS domain family, member 1 OS=Mus musculus GN=Ppp6r1 PE=2 SV=1;sp|Q7TSI3|PP6R1_MOUSE Serine/threonine-protein phosphatase 6 regulatory subunit 1 OS=Mus musculus GN=Ppp6r1 PE=1 SV=1;tr|Q8BNQ1|Q8BNQ1_MOUSE Putative uncharacterized pr	195300000	323710000	261370000	22297000	5580100	9248900	7467700	433900000	529040000	364680000	10	10	10	18.7	18.7	18.7	94.555	0	28.183	780380000	21	6	6	5	6	6	5	6	6	5	8	8	5
614	Q5U463;B2RUA8;Q6S5J6-2;Q6S5J6-3;Q6S5J6;Q6S5J6-4	Q5U463;B2RUA8;Q6S5J6-2;Q6S5J6-3;Q6S5J6;Q6S5J6-4	Krev interaction trapped protein 1	Krit1	tr|Q5U463|Q5U463_MOUSE Krit1 protein (Fragment) OS=Mus musculus GN=Krit1 PE=2 SV=1;tr|B2RUA8|B2RUA8_MOUSE KRIT1, ankyrin repeat containing OS=Mus musculus GN=Krit1 PE=2 SV=1;sp|Q6S5J6-2|KRIT1_MOUSE Isoform 2 of Krev interaction trapped protein 1 OS=Mus mus	0	86934000	109710000	4274800	0	1889900	2384900	0	172210000	246800000	5	5	5	9.1	9.1	9.1	80.557	0	4.0667	196640000	7	0	3	4	0	3	4	0	3	4	0	3	4
615	B2RUC7;Q9Z1Z2	B2RUC7;Q9Z1Z2	Serine-threonine kinase receptor-associated protein	Strap	tr|B2RUC7|B2RUC7_MOUSE Serine/threonine kinase receptor associated protein OS=Mus musculus GN=Strap PE=2 SV=1;sp|Q9Z1Z2|STRAP_MOUSE Serine-threonine kinase receptor-associated protein OS=Mus musculus GN=Strap PE=1 SV=2	7489100000	7910000000	6296800000	904000000	312050000	329580000	262370000	10005000000	11017000000	9759400000	20	20	20	71.7	71.7	71.7	38.442	0	135.98	21696000000	120	18	18	16	18	18	16	18	18	16	36	43	41
616	B2RUD1;D3YV67	B2RUD1		Tmem165	tr|B2RUD1|B2RUD1_MOUSE Transmembrane protein 165 OS=Mus musculus GN=Tmem165 PE=2 SV=1	0	0	0	0	0	0	0	0	0	0	6	1	1	30.7	7.7	7.7	34.806	0	5.4163	0	0	6	5	5	1	0	0	1	0	0	0	0	0
617	B2RUE8;F8VPL5;Q6ZQ68;B7ZNR9;E9PVG7;B7ZNR8;P97820;Q61155;Q3UTY9;Q571L1	B2RUE8;F8VPL5;Q6ZQ68;B7ZNR9;E9PVG7;B7ZNR8;P97820	Mitogen-activated protein kinase kinase kinase kinase 4	Map4k4;mKIAA0687	tr|B2RUE8|B2RUE8_MOUSE Map4k4 protein OS=Mus musculus GN=Map4k4 PE=2 SV=1;tr|F8VPL5|F8VPL5_MOUSE Mitogen-activated protein kinase kinase kinase kinase 4 OS=Mus musculus GN=Map4k4 PE=1 SV=1;tr|Q6ZQ68|Q6ZQ68_MOUSE MKIAA0687 protein (Fragment) OS=Mus musculus	227600000	159780000	247530000	9920600	3556300	2496600	3867700	351710000	273070000	332550000	13	13	11	18.9	18.9	17.1	139.06	0	27.147	634920000	23	9	7	6	9	7	6	8	5	4	7	6	10
618	B2RUG4;Q61602;B7ZNV2;Q3TYX7;Q3UMJ8	B2RUG4;Q61602;B7ZNV2	Transcriptional activator GLI3;Transcriptional repressor GLI3R	Gli3	tr|B2RUG4|B2RUG4_MOUSE GLI-Kruppel family member GLI3 OS=Mus musculus GN=Gli3 PE=2 SV=1;sp|Q61602|GLI3_MOUSE Transcriptional activator GLI3 OS=Mus musculus GN=Gli3 PE=1 SV=2;tr|B7ZNV2|B7ZNV2_MOUSE GLI-Kruppel family member GLI3 OS=Mus musculus GN=Gli3 PE=2	78050000	73772000	94432000	3675400	1164900	1101100	1409400	177160000	118570000	158950000	7	7	7	7.5	7.5	7.5	171.65	0	12.212	246250000	9	4	3	4	4	3	4	4	3	4	4	2	3
619	B2RUG7;O88532;F6QJP7;F6V459;D3Z5G4;D3Z7V6;F6RTK9	B2RUG7;O88532	Zinc finger RNA-binding protein	Zfr	tr|B2RUG7|B2RUG7_MOUSE Zinc finger RNA binding protein OS=Mus musculus GN=Zfr PE=2 SV=1;sp|O88532|ZFR_MOUSE Zinc finger RNA-binding protein OS=Mus musculus GN=Zfr PE=1 SV=2	4048900000	4290700000	4008300000	252000000	82631000	87566000	81801000	6570200000	6370000000	6427200000	32	32	32	48.8	48.8	48.8	114.45	0	187.06	12348000000	129	27	28	28	27	28	28	27	28	28	40	48	41
620	B2RUG8;D6RI62;Q8BJR0;F6WV21;D6REV1;Q8BZ32;D3Z112	B2RUG8;D6RI62;Q8BJR0;F6WV21;D6REV1;Q8BZ32	Putative Polycomb group protein ASXL2	Asxl2	tr|B2RUG8|B2RUG8_MOUSE Asxl2 protein OS=Mus musculus GN=Asxl2 PE=2 SV=1;tr|D6RI62|D6RI62_MOUSE Putative Polycomb group protein ASXL2 (Fragment) OS=Mus musculus GN=Asxl2 PE=4 SV=2;tr|Q8BJR0|Q8BJR0_MOUSE Putative uncharacterized protein (Fragment) OS=Mus mus	74105000	12982000	37506000	1597300	950070	166430	480850	91121000	114180000	97209000	3	3	3	2.7	2.7	2.7	152.31	0	3.3934	124590000	5	2	1	2	2	1	2	2	1	2	2	1	2
621	B2RUJ4;Z4YKQ9;Q4QY64;Q4QY64-2	B2RUJ4;Z4YKQ9;Q4QY64;Q4QY64-2	ATPase family AAA domain-containing protein 5	Atad5	tr|B2RUJ4|B2RUJ4_MOUSE Atad5 protein OS=Mus musculus GN=Atad5 PE=2 SV=1;tr|Z4YKQ9|Z4YKQ9_MOUSE ATPase family AAA domain-containing protein 5 OS=Mus musculus GN=Atad5 PE=4 SV=1;sp|Q4QY64|ATAD5_MOUSE ATPase family AAA domain-containing protein 5 OS=Mus muscu	131170000	186910000	395430000	6795400	1249300	1780100	3766000	263730000	373420000	564060000	8	8	8	5.1	5.1	5.1	197.98	0	10.478	713520000	16	5	6	6	5	6	6	5	6	6	5	5	6
622	Q3UPQ2;Q5NCJ0;B2RUJ6;Q5NCJ1;Q8R3E5;Q8VCK0	Q3UPQ2;Q5NCJ0;B2RUJ6;Q5NCJ1;Q8R3E5;Q8VCK0		Rapgef6	tr|Q3UPQ2|Q3UPQ2_MOUSE Putative uncharacterized protein (Fragment) OS=Mus musculus GN=Rapgef6 PE=2 SV=1;tr|Q5NCJ0|Q5NCJ0_MOUSE Protein Rapgef6 OS=Mus musculus GN=Rapgef6 PE=4 SV=1;tr|B2RUJ6|B2RUJ6_MOUSE Rapgef6 protein OS=Mus musculus GN=Rapgef6 PE=2 SV=1;	0	24165000	13336000	551500	0	355370	196120	0	53006000	36253000	4	2	2	5.2	3.3	3.3	125.57	0	3.3939	37502000	4	1	3	4	0	2	2	0	2	2	0	2	2
623	S4R203;B2RUJ8;S4R248;S4R221;Q8C0D4;S4R1B0;Q8R1F4;Q9CZD7;S4R2V0	S4R203;B2RUJ8;S4R248;S4R221;Q8C0D4	Rho GTPase-activating protein 12	Arhgap12	tr|S4R203|S4R203_MOUSE Rho GTPase-activating protein 12 OS=Mus musculus GN=Arhgap12 PE=1 SV=1;tr|B2RUJ8|B2RUJ8_MOUSE Rho GTPase activating protein 12 OS=Mus musculus GN=Arhgap12 PE=1 SV=1;tr|S4R248|S4R248_MOUSE Rho GTPase-activating protein 12 OS=Mus muscu	725890000	300720000	587840000	31656000	14233000	5896500	11526000	931020000	875350000	939030000	13	13	13	23.6	23.6	23.6	87.321	0	20.852	1614400000	29	10	6	11	10	6	11	10	6	11	12	6	11
624	E9Q1A0;B7ZNY0;G3X9L9;B2RUJ9;Q80YT7;Q3UR03;H3BJ38	E9Q1A0;B7ZNY0;G3X9L9;B2RUJ9;Q80YT7;Q3UR03	Myomegalin	Pde4dip	tr|E9Q1A0|E9Q1A0_MOUSE Myomegalin OS=Mus musculus GN=Pde4dip PE=4 SV=1;tr|B7ZNY0|B7ZNY0_MOUSE Pde4dip protein OS=Mus musculus GN=Pde4dip PE=1 SV=1;tr|G3X9L9|G3X9L9_MOUSE Myomegalin OS=Mus musculus GN=Pde4dip PE=4 SV=1;tr|B2RUJ9|B2RUJ9_MOUSE Pde4dip protein	52566000	0	53581000	707650	350440	0	357200	84571000	0	62184000	5	5	2	3	3	0.9	272.42	0.00015404	2.8218	106150000	4	1	1	4	1	1	4	0	1	1	1	0	3
625	G8JL85;B2RUK0;Q3V1Z0;Q80U22-2;Q80U22;Q8BPR0;G3UXJ5;Q80YT8	G8JL85;B2RUK0;Q3V1Z0;Q80U22-2;Q80U22	Iporin	Rusc2	tr|G8JL85|G8JL85_MOUSE Iporin OS=Mus musculus GN=Rusc2 PE=4 SV=1;tr|B2RUK0|B2RUK0_MOUSE Rusc2 protein OS=Mus musculus GN=Rusc2 PE=2 SV=1;tr|Q3V1Z0|Q3V1Z0_MOUSE Iporin OS=Mus musculus GN=Rusc2 PE=2 SV=1;sp|Q80U22-2|RUSC2_MOUSE Isoform 2 of Iporin OS=Mus mus	135150000	94519000	95503000	5161400	2145200	1500300	1515900	229830000	241880000	174650000	9	9	9	10.2	10.2	10.2	155.96	0	16.181	325170000	17	5	5	6	5	5	6	5	5	6	5	6	6
626	B7ZNY4;B2RUK2;Q80TH2-1;Q80TH2;Q80TH2-2;B7ZNX6;B2RUJ2	B7ZNY4;B2RUK2;Q80TH2-1;Q80TH2;Q80TH2-2;B7ZNX6;B2RUJ2	Protein LAP2	Erbb2ip	tr|B7ZNY4|B7ZNY4_MOUSE Erbb2 interacting protein OS=Mus musculus GN=Erbb2ip PE=2 SV=1;tr|B2RUK2|B2RUK2_MOUSE Erbb2 interacting protein OS=Mus musculus GN=Erbb2ip PE=2 SV=1;sp|Q80TH2-1|LAP2_MOUSE Isoform 1 of Protein LAP2 OS=Mus musculus GN=Erbb2ip;sp|Q80TH	1487800000	1369700000	1382200000	46590000	16349000	15052000	15189000	2508800000	2190200000	2440200000	35	35	33	37.2	37.2	35.4	157.2	0	161.02	4239700000	93	24	27	25	24	27	25	22	26	24	29	32	32
627	B2RUK5;Q3ULD5;Q6PD20;Q9D2F6;Q8K1L7	B2RUK5;Q3ULD5	Methylcrotonoyl-CoA carboxylase beta chain, mitochondrial	Mccc2	tr|B2RUK5|B2RUK5_MOUSE Methylcrotonoyl-Coenzyme A carboxylase 2 (Beta) OS=Mus musculus GN=Mccc2 PE=2 SV=1;sp|Q3ULD5|MCCB_MOUSE Methylcrotonoyl-CoA carboxylase beta chain, mitochondrial OS=Mus musculus GN=Mccc2 PE=1 SV=1	1008900000	737340000	1191700000	91809000	31528000	23042000	37240000	1375100000	1397800000	1354900000	18	18	18	43.9	43.9	43.9	61.378	0	69.832	2937900000	52	13	13	17	13	13	17	13	13	17	17	16	19
628	Q8BLY6;B2RUK7;Q8BWC0;Q80UQ1	Q8BLY6;B2RUK7;Q8BWC0;Q80UQ1	Two pore calcium channel protein 2	Tpcn2	tr|Q8BLY6|Q8BLY6_MOUSE Putative uncharacterized protein (Fragment) OS=Mus musculus GN=Tpcn2 PE=2 SV=1;tr|B2RUK7|B2RUK7_MOUSE Two pore segment channel 2 OS=Mus musculus GN=Tpcn2 PE=2 SV=1;sp|Q8BWC0|TPC2_MOUSE Two pore calcium channel protein 2 OS=Mus muscul	366470000	25457000	13485000	22523000	20359000	1414300	749140	0	105690000	5852700	2	2	2	8	8	8	52.141	0	3.1217	405410000	2	1	1	1	1	1	1	1	1	1	0	1	1
629	B2RUM8;Q8K363;F6ZX28;Q9CSG7;Q9CSJ2	B2RUM8;Q8K363	ATP-dependent RNA helicase DDX18	Ddx18	tr|B2RUM8|B2RUM8_MOUSE DEAD (Asp-Glu-Ala-Asp) box polypeptide 18 OS=Mus musculus GN=Ddx18 PE=2 SV=1;sp|Q8K363|DDX18_MOUSE ATP-dependent RNA helicase DDX18 OS=Mus musculus GN=Ddx18 PE=2 SV=1	2085400000	2125100000	1938600000	161820000	54879000	55923000	51016000	3471200000	2814100000	3039200000	25	25	25	55.6	55.6	55.6	74.18	0	89.755	6149100000	61	18	20	16	18	20	16	18	20	16	23	24	14
630	B2RUP0;Q8C5L7;Q8C545;Q571D9	B2RUP0;Q8C5L7	RNA-binding protein 34	Rbm34	tr|B2RUP0|B2RUP0_MOUSE RNA binding motif protein 34 OS=Mus musculus GN=Rbm34 PE=1 SV=1;sp|Q8C5L7|RBM34_MOUSE RNA-binding protein 34 OS=Mus musculus GN=Rbm34 PE=1 SV=1	422150000	456080000	264860000	43965000	16236000	17542000	10187000	735350000	691300000	595350000	9	9	9	30.5	30.5	30.5	49.116	0	25.409	1143100000	27	5	8	6	5	8	6	5	8	6	8	11	8
631	B2RUP8;Q3UMW8	B2RUP8;Q3UMW8	Ceroid-lipofuscinosis neuronal protein 5 homolog	Cln5	tr|B2RUP8|B2RUP8_MOUSE Ceroid-lipofuscinosis, neuronal 5 OS=Mus musculus GN=Cln5 PE=2 SV=1;sp|Q3UMW8|CLN5_MOUSE Ceroid-lipofuscinosis neuronal protein 5 homolog OS=Mus musculus GN=Cln5 PE=2 SV=1	215900000	165860000	110690000	18239000	7996400	6143000	4099700	315780000	311200000	302950000	7	7	7	19.6	19.6	19.6	39.329	0	6.9011	492460000	20	5	5	5	5	5	5	5	5	5	6	7	7
632	B2RUR0;O35601;O35601-2;Q8CAX4;Q3TA12;E0CY17	B2RUR0;O35601;O35601-2;Q8CAX4	FYN-binding protein	Fyb	tr|B2RUR0|B2RUR0_MOUSE FYN binding protein OS=Mus musculus GN=Fyb PE=2 SV=1;sp|O35601|FYB_MOUSE FYN-binding protein OS=Mus musculus GN=Fyb PE=1 SV=2;sp|O35601-2|FYB_MOUSE Isoform FYB-120 of FYN-binding protein OS=Mus musculus GN=Fyb;tr|Q8CAX4|Q8CAX4_MOUSE	443220000	591250000	594850000	38793000	10553000	14077000	14163000	943180000	843760000	871060000	18	18	18	25.8	25.8	25.8	90.054	0	46.243	1629300000	41	10	13	12	10	13	12	10	13	12	14	14	13
633	B2RUR3;P06795;P21447	B2RUR3;P06795;P21447	Multidrug resistance protein 1B;Multidrug resistance protein 1A	Abcb1b;Abcb1a	tr|B2RUR3|B2RUR3_MOUSE ATP-binding cassette, sub-family B (MDR/TAP), member 1B OS=Mus musculus GN=Abcb1b PE=2 SV=1;sp|P06795|MDR1B_MOUSE Multidrug resistance protein 1B OS=Mus musculus GN=Abcb1b PE=1 SV=1;sp|P21447|MDR1A_MOUSE Multidrug resistance protein	17068000	12987000	8558000	594040	262580	199800	131660	21023000	31454000	0	3	3	3	3.4	3.4	3.4	140.99	0	12.243	38613000	4	1	1	2	1	1	2	1	1	2	1	1	2
634	B2RUR8;D3Z210;D3YYZ8;H3BKW8;Q8R554	B2RUR8	OTU domain-containing protein 7B	Otud7b	sp|B2RUR8|OTU7B_MOUSE OTU domain-containing protein 7B OS=Mus musculus GN=Otud7b PE=1 SV=1	272750000	381800000	321030000	19129000	5348000	7486200	6294700	429490000	699580000	539650000	9	9	9	18.1	18.1	18.1	91.982	0	24.385	975580000	24	8	7	8	8	7	8	8	7	8	10	10	4
635	Q3TZ80;B2RV69;Q5SYH2;Q3U0H6	Q3TZ80;B2RV69;Q5SYH2;Q3U0H6	Transmembrane protein 199	Tmem199	tr|Q3TZ80|Q3TZ80_MOUSE Putative uncharacterized protein OS=Mus musculus GN=Tmem199 PE=2 SV=1;tr|B2RV69|B2RV69_MOUSE Expressed sequence AI316787 OS=Mus musculus GN=Tmem199 PE=2 SV=1;sp|Q5SYH2|TM199_MOUSE Transmembrane protein 199 OS=Mus musculus GN=Tmem199	118950000	71130000	183230000	33937000	10814000	6466300	16657000	114660000	112780000	160510000	4	4	4	26.9	26.9	26.9	23.129	0	14.709	373310000	6	2	1	4	2	1	4	2	1	4	2	1	3
636	B2RV71;Q9D1I2	B2RV71;Q9D1I2	Bcl10-interacting CARD protein	1110007C09Rik	tr|B2RV71|B2RV71_MOUSE RIKEN cDNA 1110007C09, isoform CRA_a OS=Mus musculus GN=1110007C09Rik PE=2 SV=1;sp|Q9D1I2|BINCA_MOUSE Bcl10-interacting CARD protein OS=Mus musculus PE=2 SV=1	78513000	61570000	59971000	14290000	5608100	4397900	4283700	121540000	157070000	121910000	2	2	2	13.1	13.1	13.1	20.936	0.00015363	2.7781	200050000	4	1	2	1	1	2	1	1	2	1	1	2	1
637	Q3V1L7;B2RV73;Q8VHI3;Q3UHF9	Q3V1L7;B2RV73;Q8VHI3;Q3UHF9	GDP-fucose protein O-fucosyltransferase 2	Pofut2	tr|Q3V1L7|Q3V1L7_MOUSE Putative uncharacterized protein OS=Mus musculus GN=Pofut2 PE=2 SV=1;tr|B2RV73|B2RV73_MOUSE Protein O-fucosyltransferase 2 OS=Mus musculus GN=Pofut2 PE=2 SV=1;sp|Q8VHI3|OFUT2_MOUSE GDP-fucose protein O-fucosyltransferase 2 OS=Mus mus	613920000	382220000	143490000	36762000	19804000	12330000	4628600	570280000	584640000	379860000	8	8	8	24	24	24	49.387	0	28.329	1139600000	21	6	6	4	6	6	4	6	6	4	7	9	5
638	Q8CAZ0;B2RV89	Q8CAZ0;B2RV89		Gm5082	tr|Q8CAZ0|Q8CAZ0_MOUSE Putative uncharacterized protein OS=Mus musculus GN=Gm5082 PE=2 SV=1;tr|B2RV89|B2RV89_MOUSE Predicted gene, EG328231 OS=Mus musculus GN=Gm5082 PE=2 SV=1	0	0	0	0	0	0	0	0	0	0	1	1	1	8	8	8	15.27	1	-2	0	0	1	0	0	1	0	0	1	0	0	0	0	0
639	B2RVD5;Q8CBB6;Q921L4;Q8CGP1;P10853;A0JLV3;Q8CGP2;Q64475;Q8CGP2-2;A0JNS9;P70696;Q8VEE3;G3X9D5	B2RVD5;Q8CBB6;Q921L4;Q8CGP1;P10853;A0JLV3;Q8CGP2;Q64475;Q8CGP2-2;A0JNS9;P70696	Histone H2B;Histone H2B type 1-K;Histone H2B type 1-F/J/L;Histone H2B type 1-P;Histone H2B type 1-B;Histone H2B type 1-A	Hist1h2bk;Hist1h2br;LOC665622;Hist1h2bf;Hist1h2bj;Hist1h2bp;Hist1h2bb;Hist1h2ba	tr|B2RVD5|B2RVD5_MOUSE Histone H2B OS=Mus musculus GN=Hist1h2bk PE=2 SV=1;tr|Q8CBB6|Q8CBB6_MOUSE Histone H2B OS=Mus musculus GN=Hist1h2br PE=2 SV=1;tr|Q921L4|Q921L4_MOUSE Histone H2B OS=Mus musculus GN=LOC665622 PE=2 SV=1;sp|Q8CGP1|H2B1K_MOUSE Histone H2B	60377000	40267000	0	9149500	5488800	3660600	0	61281000	42029000	0	11	1	0	71.4	5.6	0	13.92	0.0028831	1.8858	100640000	5	10	8	9	1	1	1	0	0	0	2	2	1
640	B2RVP5;Q3THW5;P0C0S6;Q8R029;Q3TFU6;Q3UA95;G3UWL7	B2RVP5;Q3THW5;P0C0S6;Q8R029;Q3TFU6;Q3UA95	Histone H2A;Histone H2A.V;Histone H2A.Z	H2afv;H2afz	tr|B2RVP5|B2RVP5_MOUSE Histone H2A OS=Mus musculus GN=H2afv PE=2 SV=1;sp|Q3THW5|H2AV_MOUSE Histone H2A.V OS=Mus musculus GN=H2afv PE=1 SV=3;sp|P0C0S6|H2AZ_MOUSE Histone H2A.Z OS=Mus musculus GN=H2afz PE=1 SV=2;tr|Q8R029|Q8R029_MOUSE Histone H2A OS=Mus musc	26000000000	14557000000	15358000000	9319200000	4333300000	2426200000	2559700000	30186000000	30220000000	25472000000	5	3	3	53.9	41.4	41.4	13.509	0	55.339	55915000000	70	5	5	5	3	3	3	3	3	3	24	20	26
641	B2RVQ1;Q9CQG6-2;Q9CQG6	B2RVQ1;Q9CQG6-2;Q9CQG6	Transmembrane protein 147	Tmem147	tr|B2RVQ1|B2RVQ1_MOUSE Transmembrane protein 147 OS=Mus musculus GN=Tmem147 PE=2 SV=1;sp|Q9CQG6-2|TM147_MOUSE Isoform 2 of Transmembrane protein 147 OS=Mus musculus GN=Tmem147;sp|Q9CQG6|TM147_MOUSE Transmembrane protein 147 OS=Mus musculus GN=Tmem147 PE=2	0	82653000	54724000	10567000	0	6357900	4209600	0	179060000	134730000	2	2	2	12.9	12.9	12.9	25.335	0	3.2219	137380000	3	1	1	1	1	1	1	1	1	1	1	1	1
642	B2RVQ7;Q9D115	B2RVQ7;Q9D115	Zinc finger protein 706	Zfp706;Znf706	tr|B2RVQ7|B2RVQ7_MOUSE Zinc finger protein 706 OS=Mus musculus GN=Zfp706 PE=2 SV=1;sp|Q9D115|ZN706_MOUSE Zinc finger protein 706 OS=Mus musculus GN=Znf706 PE=2 SV=1	141390000	65938000	151610000	59823000	23565000	10990000	25269000	141390000	0	160000000	1	1	1	15.8	15.8	15.8	8.4977	0.002039	2.0185	358940000	5	1	1	1	1	1	1	1	1	1	2	1	2
643	Q3TM85;Q3U3W2;B2RVR2;Q80TD8	Q3TM85;Q3U3W2;B2RVR2;Q80TD8		Tmem181b-ps;Tmem181a;mKIAA1423	tr|Q3TM85|Q3TM85_MOUSE Putative uncharacterized protein (Fragment) OS=Mus musculus PE=2 SV=1;tr|Q3U3W2|Q3U3W2_MOUSE Protein Tmem181a OS=Mus musculus GN=Tmem181a PE=2 SV=1;tr|B2RVR2|B2RVR2_MOUSE Predicted gene, 547127 OS=Mus musculus GN=547127 PE=2 SV=1;tr|	450970000	382860000	245430000	89939000	37581000	31905000	20453000	787470000	827410000	485350000	3	3	3	18.4	18.4	18.4	21.869	0	4.4482	1079300000	14	3	3	2	3	3	2	3	3	2	5	6	3
644	B2RVT1;D3Z159;Q3U898	B2RVT1;D3Z159;Q3U898	Myeloma-overexpressed gene 2 protein homolog	Myeov2	tr|B2RVT1|B2RVT1_MOUSE MCG20113, isoform CRA_e OS=Mus musculus GN=Myeov2 PE=2 SV=1;tr|D3Z159|D3Z159_MOUSE MCG20113, isoform CRA_d OS=Mus musculus GN=Myeov2 PE=4 SV=1;sp|Q3U898|MYOV2_MOUSE Myeloma-overexpressed gene 2 protein homolog OS=Mus musculus GN=Myeo	53172000	27867000	0	81040000	53172000	27867000	0	0	29082000	0	1	1	1	35.1	35.1	35.1	6.1966	0	4.7826	81040000	0	1	1	0	1	1	0	1	1	0	0	0	0
645	B2RWB7;Q8BZA9	B2RWB7;Q8BZA9	Fructose-2,6-bisphosphatase TIGAR	9630033F20Rik;Tigar	tr|B2RWB7|B2RWB7_MOUSE 9630033F20Rik protein OS=Mus musculus GN=9630033F20Rik PE=2 SV=1;sp|Q8BZA9|TIGAR_MOUSE Fructose-2,6-bisphosphatase TIGAR OS=Mus musculus GN=Tigar PE=1 SV=1	150000000	61509000	120660000	22144000	10000000	4100600	8043800	242460000	178290000	184310000	4	4	4	28.3	28.3	28.3	29.19	0	9.7213	332170000	10	3	2	4	3	2	4	3	2	4	3	3	4
646	F8WIX8;Q149V4;B2RWH3;Q64523;Q6GSS7	F8WIX8;Q149V4;B2RWH3;Q64523;Q6GSS7	Histone H2A;Histone H2A type 2-C;Histone H2A type 2-A	Hist1h2al;Hist2h2ac;Hist2h2aa1	tr|F8WIX8|F8WIX8_MOUSE Histone H2A OS=Mus musculus GN=Hist1h2al PE=3 SV=1;tr|Q149V4|Q149V4_MOUSE Histone H2A OS=Mus musculus GN=Hist2h2ac PE=2 SV=1;tr|B2RWH3|B2RWH3_MOUSE Histone H2A OS=Mus musculus GN=Hist2h2aa1 PE=2 SV=1;sp|Q64523|H2A2C_MOUSE Histone H2A	230980000	212810000	50973000	70680000	32997000	30401000	7281800	318040000	336640000	133990000	8	2	1	65.6	32	8.8	13.607	0	17.808	494760000	12	7	7	8	2	2	2	1	1	1	5	5	2
647	B2RWI2;Q9EP89;Q80UJ8;A1A4A8;Q3UEQ3;A0PJ65	B2RWI2;Q9EP89;Q80UJ8	Serine beta-lactamase-like protein LACTB, mitochondrial	Lactb	tr|B2RWI2|B2RWI2_MOUSE Lactamase, beta OS=Mus musculus GN=Lactb PE=2 SV=1;sp|Q9EP89|LACTB_MOUSE Serine beta-lactamase-like protein LACTB, mitochondrial OS=Mus musculus GN=Lactb PE=1 SV=1;tr|Q80UJ8|Q80UJ8_MOUSE Lactb protein OS=Mus musculus GN=Lactb PE=2 SV	760200000	562720000	503270000	55339000	23036000	17052000	15251000	901890000	892110000	915280000	10	10	10	32.3	32.3	32.3	60.705	0	33.208	1826200000	25	9	5	6	9	5	6	9	5	6	12	6	7
648	B2RWS6;Q8BJ14	B2RWS6	Histone acetyltransferase p300	Ep300	sp|B2RWS6|EP300_MOUSE Histone acetyltransferase p300 OS=Mus musculus GN=Ep300 PE=1 SV=2	495810000	427830000	332270000	15131000	5973600	5154600	4003200	601620000	763510000	635650000	14	14	5	7.3	7.3	2.6	263.3	0	26.26	1255900000	31	13	9	7	13	9	7	4	1	2	15	8	8
649	B2RWS7;Q8BZ47	B2RWS7;Q8BZ47	Zinc finger protein 609	Zfp609;Znf609	tr|B2RWS7|B2RWS7_MOUSE Zinc finger protein 609 OS=Mus musculus GN=Zfp609 PE=2 SV=1;sp|Q8BZ47|ZN609_MOUSE Zinc finger protein 609 OS=Mus musculus GN=Znf609 PE=1 SV=2	192940000	60606000	94479000	5437900	3014700	946970	1476200	229200000	190240000	229730000	8	8	8	8.3	8.3	8.3	145.89	0	15.941	348030000	23	7	5	4	7	5	4	7	5	4	9	8	6
650	B2RWT9;Q8CJH3	B2RWT9;Q8CJH3	Plexin-B1	Plxnb1	tr|B2RWT9|B2RWT9_MOUSE Plexin B1 OS=Mus musculus GN=Plxnb1 PE=2 SV=1;sp|Q8CJH3|PLXB1_MOUSE Plexin-B1 OS=Mus musculus GN=Plxnb1 PE=1 SV=2	328090000	180770000	234630000	7744700	3417600	1883000	2444100	452890000	347800000	537270000	13	13	13	10.2	10.2	10.2	231.44	0	37.032	743500000	23	9	6	6	9	6	6	9	6	6	10	5	8
651	B2RWU3;Q9JL70;F7CK17;D3Z403;D3Z6Y5	B2RWU3;Q9JL70;F7CK17	Fanconi anemia group A protein homolog	Fanca	tr|B2RWU3|B2RWU3_MOUSE Fanconi anemia, complementation group A OS=Mus musculus GN=Fanca PE=2 SV=1;sp|Q9JL70|FANCA_MOUSE Fanconi anemia group A protein homolog OS=Mus musculus GN=Fanca PE=2 SV=2;tr|F7CK17|F7CK17_MOUSE Fanconi anemia group A protein homolog	18613000	11467000	27175000	665750	216430	133330	315980	31568000	19894000	0	4	4	4	5.1	5.1	5.1	161.22	0.0020387	2.0185	57255000	4	2	2	1	2	2	1	2	2	1	1	2	1
652	B2RWU7;D3Z2E7;E9Q3L4;G3UXS8;Q8BW36;G3UY50;E9PVL3;E9PUG6;E9QAN9;Q504N7;O35368;Q8BV49;O35368-3	B2RWU7;D3Z2E7;E9Q3L4		AI607873	tr|B2RWU7|B2RWU7_MOUSE AI607873 protein OS=Mus musculus GN=AI607873 PE=2 SV=1;tr|D3Z2E7|D3Z2E7_MOUSE Protein AI607873 OS=Mus musculus GN=AI607873 PE=4 SV=1;tr|E9Q3L4|E9Q3L4_MOUSE Protein AI607873 OS=Mus musculus GN=AI607873 PE=4 SV=2	7648600	7907900	6309900	520630	182110	188280	150240	8975600	12344000	11371000	5	1	1	7.8	1.5	1.5	107.78	0.0091603	1.3753	21866000	3	3	5	4	1	1	1	1	1	1	1	1	1
653	B2RWW1;Q8C052	B2RWW1;Q8C052	Microtubule-associated protein 1S;MAP1S heavy chain;MAP1S light chain	Map1s	tr|B2RWW1|B2RWW1_MOUSE Microtubule-associated protein 1S OS=Mus musculus GN=Map1s PE=2 SV=1;sp|Q8C052|MAP1S_MOUSE Microtubule-associated protein 1S OS=Mus musculus GN=Map1s PE=1 SV=2	1715100000	1612100000	1537300000	115820000	40836000	38383000	36602000	2878600000	2898300000	2888300000	13	13	13	20.2	20.2	20.2	103.02	0	54.639	4864500000	59	11	12	12	11	12	12	11	12	12	17	18	24
654	G3UWM5;B7ZCJ0;B2RWX1;B7ZCJ1;Q6DFV3;G3UX38	G3UWM5;B7ZCJ0;B2RWX1;B7ZCJ1;Q6DFV3	Rho GTPase-activating protein 21	Arhgap21	tr|G3UWM5|G3UWM5_MOUSE Rho GTPase-activating protein 21 (Fragment) OS=Mus musculus GN=Arhgap21 PE=1 SV=1;tr|B7ZCJ0|B7ZCJ0_MOUSE Rho GTPase-activating protein 21 OS=Mus musculus GN=Arhgap21 PE=1 SV=1;tr|B2RWX1|B2RWX1_MOUSE Arhgap21 protein OS=Mus musculus G	45974000	61836000	0	1382200	589410	792770	0	94816000	121610000	0	5	5	5	6.3	6.3	6.3	141.29	0	9.2741	107810000	9	4	5	0	4	5	0	4	5	0	4	5	0
655	E9QPY6;B2RWY6;P13705;Q8CGC9;Q3TTD3;Q3V2Z1;Q62156	E9QPY6;B2RWY6;P13705	DNA mismatch repair protein Msh3	Msh3	tr|E9QPY6|E9QPY6_MOUSE DNA mismatch repair protein Msh3 OS=Mus musculus GN=Msh3 PE=3 SV=1;tr|B2RWY6|B2RWY6_MOUSE MutS homolog 3 (E. coli) OS=Mus musculus GN=Msh3 PE=2 SV=1;sp|P13705|MSH3_MOUSE DNA mismatch repair protein Msh3 OS=Mus musculus GN=Msh3 PE=2 S	103640000	11871000	63600000	2558800	1480600	169590	908570	167920000	29537000	95915000	5	5	5	6.7	6.7	6.7	123.4	0	6.7179	179110000	9	5	1	3	5	1	3	5	1	3	5	1	3
656	Q8CHH8;F7CC56;B2RX00;Q9ESK9;E9PX56;Q6NZG0;F6TLJ4;F7CCJ3	Q8CHH8;F7CC56;B2RX00;Q9ESK9;E9PX56;Q6NZG0	RB1-inducible coiled-coil protein 1	Rb1cc1	tr|Q8CHH8|Q8CHH8_MOUSE MKIAA0203 protein (Fragment) OS=Mus musculus GN=Rb1cc1 PE=2 SV=1;tr|F7CC56|F7CC56_MOUSE RB1-inducible coiled-coil protein 1 (Fragment) OS=Mus musculus GN=Rb1cc1 PE=1 SV=1;tr|B2RX00|B2RX00_MOUSE RB1-inducible coiled-coil 1 OS=Mus musc	28818000	18432000	198170000	2530100	297090	190020	2043000	90573000	109150000	92641000	4	4	4	3.6	3.6	3.6	168.87	0	4.2006	245420000	5	2	1	3	2	1	3	2	1	3	2	1	2
657	G3X9Z4;B2RX07;Q69ZY3;F6UFZ5;Q8R2P5;A5HLW1;A5HLW0;Q3TT32;Q3TTQ0;Q99KH9;Q8K0S1;Q6PCW0	G3X9Z4;B2RX07;Q69ZY3;F6UFZ5;Q8R2P5;A5HLW1;A5HLW0		Pcf11	tr|G3X9Z4|G3X9Z4_MOUSE Cleavage and polyadenylation factor subunit homolog (S. cerevisiae) OS=Mus musculus GN=Pcf11 PE=4 SV=1;tr|B2RX07|B2RX07_MOUSE Cleavage and polyadenylation factor subunit homolog (S. cerevisiae) OS=Mus musculus GN=Pcf11 PE=2 SV=1;tr|Q	81807000	377790000	61246000	5369600	843370	3894800	631400	241560000	302850000	150830000	8	8	8	9.3	9.3	9.3	172.72	0	20.58	520850000	13	5	4	4	5	4	4	5	4	4	5	4	4
658	Q80U60;B2RX13;Q3UQ28;D3Z5M7	Q80U60;B2RX13;Q3UQ28	Peroxidasin homolog	Pxdn	tr|Q80U60|Q80U60_MOUSE MKIAA0230 protein (Fragment) OS=Mus musculus GN=Pxdn PE=2 SV=1;tr|B2RX13|B2RX13_MOUSE Peroxidasin homolog (Drosophila) OS=Mus musculus GN=Pxdn PE=2 SV=1;sp|Q3UQ28|PXDN_MOUSE Peroxidasin homolog OS=Mus musculus GN=Pxdn PE=2 SV=2	523460000	305640000	383490000	14100000	6086800	3554000	4459100	666580000	656290000	556280000	14	14	14	14.7	14.7	14.7	160.59	0	30.333	1212600000	28	11	7	12	11	7	12	11	7	12	11	7	10
659	B2RX66;Q5F2E8;Q3UUG1;F6RXB5	B2RX66;Q5F2E8	Serine/threonine-protein kinase TAO1	Taok1	tr|B2RX66|B2RX66_MOUSE MCG124812 OS=Mus musculus GN=Taok1 PE=2 SV=1;sp|Q5F2E8|TAOK1_MOUSE Serine/threonine-protein kinase TAO1 OS=Mus musculus GN=Taok1 PE=1 SV=1	466120000	496970000	418820000	24244000	8177500	8718700	7347700	715680000	661990000	725240000	10	10	9	11.6	11.6	10.3	116.05	0	19.197	1381900000	34	9	7	8	9	7	8	8	6	7	12	9	13
660	Q3UFN2;B2RX76;Q9CYK2-2;Q9CYK2	Q3UFN2;B2RX76;Q9CYK2-2;Q9CYK2	Glutaminyl-peptide cyclotransferase	Qpct	tr|Q3UFN2|Q3UFN2_MOUSE Putative uncharacterized protein OS=Mus musculus GN=Qpct PE=2 SV=1;tr|B2RX76|B2RX76_MOUSE Glutaminyl-peptide cyclotransferase (Glutaminyl cyclase) OS=Mus musculus GN=Qpct PE=2 SV=1;sp|Q9CYK2-2|QPCT_MOUSE Isoform 2 of Glutaminyl-pepti	9956800	50161000	69219000	7185300	553150	2786700	3845500	72826000	75925000	103840000	3	3	3	9.4	9.4	9.4	41.094	0	6.5205	129340000	5	1	2	3	1	2	3	1	2	3	1	1	3
661	B2RX77;Q9D483;Q9D483-2;D3YYS2;F6QK97	B2RX77;Q9D483;Q9D483-2	DNA-directed RNA polymerase III subunit RPC3	Polr3c	tr|B2RX77|B2RX77_MOUSE MCG14870 OS=Mus musculus GN=Polr3c PE=2 SV=1;sp|Q9D483|RPC3_MOUSE DNA-directed RNA polymerase III subunit RPC3 OS=Mus musculus GN=Polr3c PE=2 SV=1;sp|Q9D483-2|RPC3_MOUSE Isoform 2 of DNA-directed RNA polymerase III subunit RPC3 OS=Mu	86236000	102250000	163900000	9788500	2395400	2840200	4552900	176360000	168200000	201900000	7	7	7	16.1	16.1	16.1	60.705	0	20.065	352390000	9	2	3	6	2	3	6	2	3	6	2	2	5
662	B2RXC1;B2RXC1-2	B2RXC1	Trafficking protein particle complex subunit 11	Trappc11	sp|B2RXC1|TPC11_MOUSE Trafficking protein particle complex subunit 11 OS=Mus musculus GN=Trappc11 PE=2 SV=1	852130000	774360000	738260000	36949000	13315000	12099000	11535000	1413300000	1379700000	1583100000	18	18	18	26.3	26.3	26.3	128.39	0	59.254	2364800000	47	13	10	12	13	10	12	13	10	12	14	16	17
663	B2RXC6;Q7TSI4	B2RXC6	DNA-directed RNA polymerase	Polr3a	tr|B2RXC6|B2RXC6_MOUSE DNA-directed RNA polymerase OS=Mus musculus GN=Polr3a PE=2 SV=1	303280000	391420000	499430000	12439000	3159100	4077300	5202400	714560000	777550000	740570000	16	16	16	15.8	15.8	15.8	155.74	0	29.612	1194100000	35	9	13	11	9	13	11	9	13	11	10	13	12
664	B2RXC8;Q8BXX8;Q8BVE6	B2RXC8;Q8BXX8		Ppp2r3a	tr|B2RXC8|B2RXC8_MOUSE 3222402P14Rik protein OS=Mus musculus GN=Ppp2r3a PE=2 SV=1;tr|Q8BXX8|Q8BXX8_MOUSE Putative uncharacterized protein (Fragment) OS=Mus musculus GN=Ppp2r3a PE=2 SV=1	51454000	85987000	6291400	2245800	803970	1343500	98303	80389000	92357000	32674000	4	4	4	4.9	4.9	4.9	130.26	0	7.7591	143730000	7	3	4	1	3	4	1	3	4	1	3	3	1
665	B7ZWI2;B2RXM7;Q9D1J3	B7ZWI2;B2RXM7;Q9D1J3	SAP domain-containing ribonucleoprotein	1110005A23Rik;Sarnp	tr|B7ZWI2|B7ZWI2_MOUSE 1110005A23Rik protein OS=Mus musculus GN=1110005A23Rik PE=2 SV=1;tr|B2RXM7|B2RXM7_MOUSE MCG113697 OS=Mus musculus GN=1110005A23Rik PE=2 SV=1;sp|Q9D1J3|SARNP_MOUSE SAP domain-containing ribonucleoprotein OS=Mus musculus GN=Sarnp PE=1	7965700000	7801600000	7901400000	1577900000	531050000	520100000	526760000	11475000000	12632000000	12908000000	8	8	8	41.6	41.6	41.6	23.461	0	73.609	23669000000	52	8	8	8	8	8	8	8	8	8	18	19	15
666	D3Z768;B2RXV1;B2RXP0;B7ZWF2;P0C6A2	D3Z768;B2RXV1;B2RXP0;B7ZWF2;P0C6A2	Mastermind-like domain-containing protein 1	Mamld1	tr|D3Z768|D3Z768_MOUSE Mastermind-like domain-containing protein 1 OS=Mus musculus GN=Mamld1 PE=4 SV=3;tr|B2RXV1|B2RXV1_MOUSE Mamld1 protein OS=Mus musculus GN=Mamld1 PE=2 SV=1;tr|B2RXP0|B2RXP0_MOUSE Mamld1 protein OS=Mus musculus GN=Mamld1 PE=2 SV=1;tr|B7	0	5937200	0	237490	0	237490	0	0	8095700	0	1	1	1	2	2	2	83.39	0.0018953	2.0271	5937200	1	0	1	0	0	1	0	0	1	0	0	1	0
667	E9Q3A7;B2RXP4;Q3UFN0	E9Q3A7;B2RXP4;Q3UFN0		Cdh19	tr|E9Q3A7|E9Q3A7_MOUSE Protein Cdh19 OS=Mus musculus GN=Cdh19 PE=4 SV=1;tr|B2RXP4|B2RXP4_MOUSE Cadherin 19, type 2 OS=Mus musculus GN=Cdh19 PE=2 SV=1;tr|Q3UFN0|Q3UFN0_MOUSE Putative uncharacterized protein (Fragment) OS=Mus musculus GN=Cdh19 PE=2 SV=1	186050000	273390000	158160000	16253000	4896000	7194400	4162100	401890000	422440000	449510000	6	6	6	9.2	9.2	9.2	87.259	0	19.761	617600000	11	3	6	3	3	6	3	3	6	3	2	6	3
668	B2RXW8;B2RXQ2;B8QI33;B8QI34;Q5DTM9;Q8BSS9;Q3UJC0;S4R1I7;Q69ZW5;B8QI36	B2RXW8;B2RXQ2;B8QI33		Ppfia1	tr|B2RXW8|B2RXW8_MOUSE Ppfia1 protein OS=Mus musculus GN=Ppfia1 PE=1 SV=1;tr|B2RXQ2|B2RXQ2_MOUSE Ppfia1 protein OS=Mus musculus GN=Ppfia1 PE=1 SV=1;tr|B8QI33|B8QI33_MOUSE Liprin-alpha 1 OS=Mus musculus GN=Ppfia1 PE=2 SV=1	1646300000	1702200000	1305700000	60444000	21381000	22106000	16957000	2359600000	2229300000	2016900000	24	24	11	25.9	25.9	11.1	140.13	0	129.18	4654200000	65	18	19	19	18	19	19	8	9	9	20	25	20
669	B7ZWK5;E9Q839;B2RXQ3;Q6P9P0;Q3UH46;Q8BZ50;Q3TST9	B7ZWK5;E9Q839;B2RXQ3;Q6P9P0;Q3UH46;Q8BZ50;Q3TST9	Protein FAM178A	Fam178a	tr|B7ZWK5|B7ZWK5_MOUSE Fam178a protein OS=Mus musculus GN=Fam178a PE=2 SV=1;tr|E9Q839|E9Q839_MOUSE Protein FAM178A OS=Mus musculus GN=Fam178a PE=4 SV=1;tr|B2RXQ3|B2RXQ3_MOUSE Family with sequence similarity 178, member A OS=Mus musculus GN=Fam178a PE=2 SV=	32559000	20823000	34446000	1351200	500910	320350	529940	58837000	0	59725000	4	4	4	4.1	4.1	4.1	127.9	0	4.2433	87828000	7	2	3	2	2	3	2	2	3	2	2	3	2
670	B2RXQ4;B7ZWK0;Q69Z74;B2RXX0;P51954;Q8CD72;Q8BSB6;F6R259	B2RXQ4;B7ZWK0;Q69Z74;B2RXX0;P51954;Q8CD72	Serine/threonine-protein kinase Nek1	Nek1	tr|B2RXQ4|B2RXQ4_MOUSE Nek1 protein OS=Mus musculus GN=Nek1 PE=2 SV=1;tr|B7ZWK0|B7ZWK0_MOUSE Nek1 protein OS=Mus musculus GN=Nek1 PE=1 SV=1;tr|Q69Z74|Q69Z74_MOUSE MKIAA1901 protein (Fragment) OS=Mus musculus GN=Nek1 PE=2 SV=1;tr|B2RXX0|B2RXX0_MOUSE Nek1 pr	5019600	6628600	529250000	7839200	72748	96067	7670400	0	139940000	575400000	5	5	5	4.6	4.6	4.6	133.85	0	3.2573	540900000	6	2	1	4	2	1	4	2	1	4	2	1	3
671	B9EKR4;B2RXQ5;Q69ZK0;I7HPV9;Q69ZK0-2;Q3U173	B9EKR4;B2RXQ5;Q69ZK0;I7HPV9	Phosphatidylinositol 3,4,5-trisphosphate-dependent Rac exchanger 1 protein	Prex1	tr|B9EKR4|B9EKR4_MOUSE Phosphatidylinositol-3,4, 5-trisphosphate-dependent Rac exchange factor 1 OS=Mus musculus GN=Prex1 PE=2 SV=1;tr|B2RXQ5|B2RXQ5_MOUSE Phosphatidylinositol-3,4, 5-trisphosphate-dependent Rac exchange factor 1 OS=Mus musculus GN=Prex1 PE	1568300000	1345400000	1146700000	41859000	16168000	13870000	11821000	2425900000	2431200000	2534800000	34	34	34	28	28	28	184.94	0	125.59	4060400000	79	22	23	22	22	23	22	22	23	22	29	24	26
672	B2RXQ8;Q8BFQ4	B2RXQ8;Q8BFQ4	WD repeat-containing protein 82	Wdr82	tr|B2RXQ8|B2RXQ8_MOUSE MCG19514, isoform CRA_a OS=Mus musculus GN=Wdr82 PE=2 SV=1;sp|Q8BFQ4|WDR82_MOUSE WD repeat-containing protein 82 OS=Mus musculus GN=Wdr82 PE=1 SV=1	1875300000	1463800000	1364900000	235200000	93763000	73190000	68247000	3049800000	2594200000	3641000000	14	14	14	45.7	45.7	45.7	35.079	0	50.855	4704000000	62	11	12	11	11	12	11	11	12	11	23	21	18
673	B2RXR2;Q8VD65;B2RY05	B2RXR2;Q8VD65;B2RY05	Phosphoinositide 3-kinase regulatory subunit 4	Pik3r4	tr|B2RXR2|B2RXR2_MOUSE Phosphatidylinositol 3 kinase, regulatory subunit, polypeptide 4, p150 OS=Mus musculus GN=Pik3r4 PE=2 SV=1;sp|Q8VD65|PI3R4_MOUSE Phosphoinositide 3-kinase regulatory subunit 4 OS=Mus musculus GN=Pik3r4 PE=1 SV=3;tr|B2RY05|B2RY05_MOUS	1778800000	1788000000	899350000	61180000	24368000	24493000	12320000	2719600000	2663800000	2499600000	28	28	28	25.8	25.8	25.8	152.57	0	75.004	4466100000	71	21	23	16	21	23	16	21	23	16	29	26	16
674	J3QK13;E9QNQ2;B2RXR6	J3QK13;E9QNQ2;B2RXR6	Serine/threonine-protein phosphatase 6 regulatory ankyrin repeat subunit B	Ankrd44	tr|J3QK13|J3QK13_MOUSE Serine/threonine-protein phosphatase 6 regulatory ankyrin repeat subunit B (Fragment) OS=Mus musculus GN=Ankrd44 PE=4 SV=1;tr|E9QNQ2|E9QNQ2_MOUSE Serine/threonine-protein phosphatase 6 regulatory ankyrin repeat subunit B OS=Mus muscu	0	18540000	20771000	1034500	0	487890	546610	0	32736000	30479000	2	2	2	3.2	3.2	3.2	85.184	0.00015547	2.9279	39311000	2	0	1	2	0	1	2	0	1	2	0	0	2
675	B2RXX5;B2RXR8;E9PX39	B2RXX5;B2RXR8;E9PX39		Adamts14	tr|B2RXX5|B2RXX5_MOUSE A disintegrin-like and metallopeptidase (Reprolysin type) with thrombospondin type 1 motif, 14 OS=Mus musculus GN=Adamts14 PE=2 SV=1;tr|B2RXR8|B2RXR8_MOUSE A disintegrin-like and metallopeptidase (Reprolysin type) with thrombospondin	0	9651400	22640000	461300	0	137880	323420	0	0	33711000	2	2	2	2.7	2.7	2.7	133.64	0.0027453	1.9118	32291000	1	0	1	1	0	1	1	0	1	1	0	1	0
676	Q8BIZ8;B2RXS3;Q69ZJ3;F8VQ70;Q80VY7;Q8BX16;Q8C0H1;Q501L8;Q8BKW5	Q8BIZ8;B2RXS3;Q69ZJ3;F8VQ70;Q80VY7;Q8BX16;Q8C0H1;Q501L8;Q8BKW5		Scaper	tr|Q8BIZ8|Q8BIZ8_MOUSE Putative uncharacterized protein OS=Mus musculus GN=Scaper PE=2 SV=1;tr|B2RXS3|B2RXS3_MOUSE Scaper protein OS=Mus musculus GN=Scaper PE=2 SV=1;tr|Q69ZJ3|Q69ZJ3_MOUSE MKIAA1454 protein (Fragment) OS=Mus musculus GN=Scaper PE=2 SV=1;tr	15965000	0	15733000	646890	325820	0	321070	0	0	30360000	2	2	2	4.5	4.5	4.5	100.74	0.0052542	1.6803	31698000	3	1	0	2	1	0	2	1	0	2	1	0	2
677	B2RXS4;Q8CHG6;Q99LF0;Q8K2J5;REV__A2AKG8-3;REV__Q80T90;REV__E9PYJ6;REV__A2AKG8;Q9QZC2	B2RXS4;Q8CHG6	Plexin-B2	Plxnb2;mKIAA0315	sp|B2RXS4|PLXB2_MOUSE Plexin-B2 OS=Mus musculus GN=Plxnb2 PE=1 SV=1;tr|Q8CHG6|Q8CHG6_MOUSE MKIAA0315 protein (Fragment) OS=Mus musculus GN=mKIAA0315 PE=4 SV=2	2836600000	2572900000	1968300000	73778000	28366000	25729000	19683000	4387600000	4345200000	4352600000	35	35	34	28.7	28.7	28.3	206.23	0	144.27	7377800000	110	28	28	24	28	28	24	27	27	23	32	45	33
678	B2RY08;E9QMR2;B2RY79;B2RXS7;F8VPN7;Q8BIK4;Q8BIK4-2;Q7TN11;Q6PF84;Q8BIK4-3;Q3UYH1	B2RY08;E9QMR2;B2RY79;B2RXS7;F8VPN7;Q8BIK4;Q8BIK4-2;Q7TN11	Dedicator of cytokinesis protein 9	Dock9	tr|B2RY08|B2RY08_MOUSE Dock9 protein OS=Mus musculus GN=Dock9 PE=2 SV=1;tr|E9QMR2|E9QMR2_MOUSE Dedicator of cytokinesis protein 9 OS=Mus musculus GN=Dock9 PE=4 SV=1;tr|B2RY79|B2RY79_MOUSE Dock9 protein OS=Mus musculus GN=Dock9 PE=2 SV=1;tr|B2RXS7|B2RXS7_MO	173180000	96767000	191890000	3913900	1467600	820060	1626200	339780000	285610000	307300000	10	10	10	8.1	8.1	8.1	233.74	0	21.24	461840000	19	5	5	8	5	5	8	5	5	8	5	6	8
679	B2RXT3;E9Q7L0	B2RXT3;E9Q7L0		Ogdhl	tr|B2RXT3|B2RXT3_MOUSE Ogdhl protein OS=Mus musculus GN=Ogdhl PE=2 SV=1;tr|E9Q7L0|E9Q7L0_MOUSE Protein Ogdhl OS=Mus musculus GN=Ogdhl PE=4 SV=1	3989100000	3820200000	3485600000	217210000	76714000	73466000	67031000	5756900000	6639700000	6499300000	33	27	27	47.9	41.2	41.2	114.56	0	166.51	11295000000	120	29	29	27	23	23	21	23	23	21	37	41	42
680	B2RXT8;F8VPQ2;B2RY61;Q05CI2;Q6PE90;Q8BY40;Q8BYA2;Q8BWM4;E9Q9V1	B2RXT8;F8VPQ2;B2RY61;Q05CI2;Q6PE90		Arid4a	tr|B2RXT8|B2RXT8_MOUSE Arid4a protein OS=Mus musculus GN=Arid4a PE=2 SV=1;tr|F8VPQ2|F8VPQ2_MOUSE Protein Arid4a OS=Mus musculus GN=Arid4a PE=4 SV=1;tr|B2RY61|B2RY61_MOUSE AT rich interactive domain 4A (RBP1-like) OS=Mus musculus GN=Arid4a PE=2 SV=1;tr|Q05C	81533000	123350000	7559700	2870800	1101800	1666800	102160	89583000	184050000	93332000	5	5	5	4.8	4.8	4.8	141.87	0.00030614	2.6976	212440000	7	3	3	1	3	3	1	3	3	1	2	3	2
681	B2RXV4	B2RXV4	Feline leukemia virus subgroup C receptor-related protein 1	Flvcr1	sp|B2RXV4|FLVC1_MOUSE Feline leukemia virus subgroup C receptor-related protein 1 OS=Mus musculus GN=Flvcr1 PE=2 SV=1	16289000	26894000	49102000	6152300	1085900	1792900	3273500	26792000	45440000	30051000	1	1	1	3.2	3.2	3.2	60.468	0.0026072	1.9435	92284000	4	1	1	1	1	1	1	1	1	1	1	1	2
682	B2RXW4;Q9R1A8	B2RXW4;Q9R1A8	E3 ubiquitin-protein ligase RFWD2	Rfwd2	tr|B2RXW4|B2RXW4_MOUSE Ring finger and WD repeat domain 2 OS=Mus musculus GN=Rfwd2 PE=2 SV=1;sp|Q9R1A8|RFWD2_MOUSE E3 ubiquitin-protein ligase RFWD2 OS=Mus musculus GN=Rfwd2 PE=1 SV=2	21260000	78971000	22997000	3330500	574600	2134400	621550	67640000	61157000	65757000	3	3	3	4.8	4.8	4.8	80.47	0	8.1981	123230000	9	1	3	2	1	3	2	1	3	2	2	4	3
683	E0CZF8;E0CXD6;B2RXX2;B9EKN8;B2RY17;P83510-2;P83510;E0CZD7;E0CY98;E9PUL9;B2RQ80;E0CYV5	E0CZF8;E0CXD6;B2RXX2;B9EKN8;B2RY17;P83510-2;P83510;E0CZD7;E0CY98;E9PUL9;B2RQ80	Traf2 and NCK-interacting protein kinase	Tnik	tr|E0CZF8|E0CZF8_MOUSE Traf2 and NCK-interacting protein kinase OS=Mus musculus GN=Tnik PE=4 SV=1;tr|E0CXD6|E0CXD6_MOUSE Traf2 and NCK-interacting protein kinase OS=Mus musculus GN=Tnik PE=4 SV=1;tr|B2RXX2|B2RXX2_MOUSE Tnik protein OS=Mus musculus GN=Tnik	303890000	213950000	136220000	10062000	4675200	3291600	2095700	482920000	403490000	356710000	8	6	6	8.7	6.9	6.9	144.25	0	17.147	654060000	16	5	5	6	4	3	4	4	3	4	5	6	5
684	H7BX44;D3YYN8;E9PVY0;B2RXX8;Q3UU96-2;Q3UU96;F6YZJ7;F6S5Z6;F6Q5A5;F6W0C2	H7BX44;D3YYN8;E9PVY0;B2RXX8;Q3UU96-2;Q3UU96;F6YZJ7;F6S5Z6;F6Q5A5	Non-specific serine/threonine protein kinase;Serine/threonine-protein kinase MRCK alpha	Cdc42bpa	tr|H7BX44|H7BX44_MOUSE Serine/threonine-protein kinase MRCK alpha OS=Mus musculus GN=Cdc42bpa PE=4 SV=1;tr|D3YYN8|D3YYN8_MOUSE Serine/threonine-protein kinase MRCK alpha OS=Mus musculus GN=Cdc42bpa PE=4 SV=1;tr|E9PVY0|E9PVY0_MOUSE Serine/threonine-protein	257120000	61172000	30633000	4057200	2989700	711300	356200	294590000	105820000	62248000	9	7	7	7.6	6.5	6.5	185.78	0	9.7736	348920000	9	8	3	2	7	2	1	7	2	1	6	2	1
685	B7ZWM7;E9Q4F7;B2RY01;E9Q4F8;Q9CRP7;Q6PB57	B7ZWM7;E9Q4F7;B2RY01;E9Q4F8;Q9CRP7;Q6PB57		Ankrd11	tr|B7ZWM7|B7ZWM7_MOUSE Ankrd11 protein OS=Mus musculus GN=Ankrd11 PE=2 SV=1;tr|E9Q4F7|E9Q4F7_MOUSE Protein Ankrd11 OS=Mus musculus GN=Ankrd11 PE=4 SV=1;tr|B2RY01|B2RY01_MOUSE Ankrd11 protein OS=Mus musculus GN=Ankrd11 PE=2 SV=1;tr|E9Q4F8|E9Q4F8_MOUSE Prote	117480000	7629000	0	1078500	1012700	65767	0	127750000	144360000	0	2	2	2	1.1	1.1	1.1	292.8	0.0003067	2.7218	125110000	3	2	1	0	2	1	0	2	1	0	2	1	0
686	B2RY04;Q8BK93;Q91YL4	B2RY04	Dedicator of cytokinesis protein 5	Dock5	sp|B2RY04|DOCK5_MOUSE Dedicator of cytokinesis protein 5 OS=Mus musculus GN=Dock5 PE=1 SV=2	3334900000	2749900000	2460900000	73670000	28749000	23706000	21215000	5107600000	4922900000	5404800000	49	49	48	34.5	34.5	33.9	214.43	0	221.27	8545700000	150	43	41	36	43	41	36	42	40	35	49	52	49
687	B2RY27;Q8BYC6;Q3V3K3	B2RY27;Q8BYC6;Q3V3K3	Serine/threonine-protein kinase TAO3	Taok3	tr|B2RY27|B2RY27_MOUSE MCG125789, isoform CRA_a OS=Mus musculus GN=Taok3 PE=2 SV=1;sp|Q8BYC6|TAOK3_MOUSE Serine/threonine-protein kinase TAO3 OS=Mus musculus GN=Taok3 PE=1 SV=2;tr|Q3V3K3|Q3V3K3_MOUSE Serine/threonine-protein kinase TAO3 OS=Mus musculus GN=	59405000	11565000	32370000	2066800	1188100	231310	647400	75324000	56320000	57130000	4	3	3	3.6	2.1	2.1	105.36	0	3.1674	103340000	7	4	3	3	3	2	2	3	2	2	3	2	2
688	E9Q512;B2RY51;H3BJG4;Q3UFU7;Q3UTR9;Q8BVJ9;Q811I5;H3BJU5;Q9CRV3;H3BJH8	E9Q512;B2RY51;H3BJG4		Trip11	tr|E9Q512|E9Q512_MOUSE Protein Trip11 OS=Mus musculus GN=Trip11 PE=4 SV=1;tr|B2RY51|B2RY51_MOUSE Thyroid hormone receptor interactor 11 OS=Mus musculus GN=Trip11 PE=2 SV=1;tr|H3BJG4|H3BJG4_MOUSE Protein Trip11 (Fragment) OS=Mus musculus GN=Trip11 PE=4 SV=1	273200000	98886000	99890000	3371300	1951400	706330	713500	411950000	189570000	175050000	13	13	13	9.3	9.3	9.3	226.45	0	47.221	471980000	16	8	2	6	8	2	6	8	2	6	7	2	7
689	B2RY56;S4R2B0;Q8BU35;S4R2A4;S4R2J1;S4R1X9;S4R2F7	B2RY56;S4R2B0;Q8BU35	RNA-binding protein 25	Rbm25	sp|B2RY56|RBM25_MOUSE RNA-binding protein 25 OS=Mus musculus GN=Rbm25 PE=1 SV=2;tr|S4R2B0|S4R2B0_MOUSE RNA-binding protein 25 (Fragment) OS=Mus musculus GN=Rbm25 PE=1 SV=1;tr|Q8BU35|Q8BU35_MOUSE Putative uncharacterized protein OS=Mus musculus GN=Rbm25 PE=	5063100000	4676900000	4329400000	390820000	140640000	129910000	120260000	7438600000	7167900000	6442900000	23	23	23	30	30	30	99.551	0	143.58	14069000000	82	18	17	18	18	17	18	18	17	18	26	27	29
690	H3BK72;B7ZWP0;H3BJZ3;B2RY59;Q5NCX5-2;Q5NCX5;Q80YV0;H9H9T3;Q6PDW9;F6WND1;H3BLC3	H3BK72;B7ZWP0;H3BJZ3;B2RY59;Q5NCX5-2;Q5NCX5;Q80YV0	Neuralized-like protein 4	Neurl4	tr|H3BK72|H3BK72_MOUSE Neuralized-like protein 4 OS=Mus musculus GN=Neurl4 PE=4 SV=1;tr|B7ZWP0|B7ZWP0_MOUSE Neurl4 protein OS=Mus musculus GN=Neurl4 PE=2 SV=1;tr|H3BJZ3|H3BJZ3_MOUSE Neuralized-like protein 4 OS=Mus musculus GN=Neurl4 PE=4 SV=1;tr|B2RY59|B2	83485000	38490000	39495000	2306700	1192600	549850	564210	70513000	91580000	0	6	6	6	5.5	5.5	5.5	165.05	0	6.1129	161470000	7	4	2	2	4	2	2	4	2	2	3	2	2
691	B2RY70;Q9D486-3;Q9D486-2;Q9D486	B2RY70;Q9D486-3;Q9D486-2;Q9D486	C-Maf-inducing protein	Cmip	tr|B2RY70|B2RY70_MOUSE 4933407C03Rik protein OS=Mus musculus GN=Cmip PE=2 SV=1;sp|Q9D486-3|CMIP_MOUSE Isoform 3 of C-Maf-inducing protein OS=Mus musculus GN=Cmip;sp|Q9D486-2|CMIP_MOUSE Isoform 2 of C-Maf-inducing protein OS=Mus musculus GN=Cmip;sp|Q9D486|C	66142000	0	0	2004300	2004300	0	0	87796000	0	0	1	1	1	2.6	2.6	2.6	82.816	0	5.8752	66142000	1	1	0	0	1	0	0	1	0	0	1	0	0
692	E9Q3T3;B2RY84;L0N7N1;Q7TQJ9	E9Q3T3;B2RY84;L0N7N1	Kinesin-like protein;Kinesin-like protein KIF14	Kif14	tr|E9Q3T3|E9Q3T3_MOUSE Protein Kif14 OS=Mus musculus GN=Kif14 PE=3 SV=1;tr|B2RY84|B2RY84_MOUSE Kif14 protein OS=Mus musculus GN=Kif14 PE=2 SV=1;tr|L0N7N1|L0N7N1_MOUSE Kinesin family member 14 OS=Mus musculus GN=Kif14 PE=1 SV=1	119990000	94040000	99216000	2900400	1111000	870740	918670	215740000	144750000	137620000	9	9	9	6.9	6.9	6.9	180.95	0	15.264	313250000	18	5	6	6	5	6	6	5	6	6	4	6	8
693	B2RY90;P85094	B2RY90;P85094	Isochorismatase domain-containing protein 2A, mitochondrial	Isoc2a	tr|B2RY90|B2RY90_MOUSE Isoc2a protein OS=Mus musculus GN=Isoc2a PE=2 SV=1;sp|P85094|ISC2A_MOUSE Isochorismatase domain-containing protein 2A, mitochondrial OS=Mus musculus GN=Isoc2a PE=1 SV=1	555970000	397420000	338940000	129230000	55597000	39742000	33894000	920110000	680090000	910230000	5	5	5	49	49	49	22.387	0	31.754	1292300000	28	3	4	4	3	4	4	3	4	4	9	10	9
694	G3UVU9;B2WTI1;B2WTI2;Q9ERI5-2;Q9ERI5;F6VRF7;F6VMC4;A4FUU3;F7BDP4	G3UVU9;B2WTI1;B2WTI2;Q9ERI5-2;Q9ERI5;F6VRF7;F6VMC4;A4FUU3	Bifunctional arginine demethylase and lysyl-hydroxylase JMJD6	Jmjd6	tr|G3UVU9|G3UVU9_MOUSE Bifunctional arginine demethylase and lysyl-hydroxylase JMJD6 OS=Mus musculus GN=Jmjd6 PE=4 SV=1;tr|B2WTI1|B2WTI1_MOUSE Phosphatidylserine receptor transcript variant 1 OS=Mus musculus GN=Jmjd6 PE=2 SV=1;tr|B2WTI2|B2WTI2_MOUSE Phosph	325900000	437080000	391960000	72184000	20369000	27318000	24498000	559200000	653140000	543630000	8	8	8	48.9	48.9	48.9	32.003	0	46.826	1154900000	30	6	8	6	6	8	6	6	8	6	7	13	10
695	Q80UU5;B2X2E1;Q7TMI8;Q6PF88;F6QX82;Q80Z69;Q6PAJ6;Q5HZJ0;Q8CJ74	Q80UU5;B2X2E1;Q7TMI8;Q6PF88;F6QX82;Q80Z69;Q6PAJ6;Q5HZJ0;Q8CJ74	Ribonuclease 3	Drosha	tr|Q80UU5|Q80UU5_MOUSE Rnasen protein (Fragment) OS=Mus musculus GN=Drosha PE=2 SV=1;tr|B2X2E1|B2X2E1_MOUSE ASL1/DROSHA fusion OS=Mus musculus PE=2 SV=1;tr|Q7TMI8|Q7TMI8_MOUSE Rnasen protein (Fragment) OS=Mus musculus GN=Drosha PE=2 SV=1;tr|Q6PF88|Q6PF88_M	59434000	16337000	44773000	2739600	1350800	371290	1017600	92254000	18253000	51996000	5	5	5	8.2	8.2	8.2	82.083	0	9.0996	120540000	6	2	3	3	2	3	3	2	3	3	2	2	2
696	B2ZAC8;Q8R3L2-4;Q8R3L2-3;Q8R3L2-2;Q8R3L2-5;Q8R3L2;Q80TL2	B2ZAC8;Q8R3L2-4;Q8R3L2-3;Q8R3L2-2;Q8R3L2-5;Q8R3L2;Q80TL2	Transcription factor 25	Tcf25	tr|B2ZAC8|B2ZAC8_MOUSE Nuclear localized protein-1 isoform d (Fragment) OS=Mus musculus GN=Tcf25 PE=2 SV=1;sp|Q8R3L2-4|TCF25_MOUSE Isoform 4 of Transcription factor 25 OS=Mus musculus GN=Tcf25;sp|Q8R3L2-3|TCF25_MOUSE Isoform 3 of Transcription factor 25 OS	158380000	155710000	157060000	13087000	4399300	4325300	4362800	193130000	212350000	224930000	8	8	8	14.3	14.3	14.3	73.951	0	15.111	471150000	14	7	4	5	7	4	5	7	4	5	6	4	4
697	B2ZRS8;B2ZRS7;B2ZRS3;Q570Y9-2;Q570Y9	B2ZRS8;B2ZRS7;B2ZRS3;Q570Y9-2;Q570Y9	DEP domain-containing mTOR-interacting protein	Depdc6;Deptor	tr|B2ZRS8|B2ZRS8_MOUSE Depdc6-003 OS=Mus musculus GN=Depdc6 PE=4 SV=1;tr|B2ZRS7|B2ZRS7_MOUSE Depdc6-003 OS=Mus musculus GN=Deptor PE=4 SV=1;tr|B2ZRS3|B2ZRS3_MOUSE Depdc6-001 OS=Mus musculus GN=Deptor PE=4 SV=1;sp|Q570Y9-2|DPTOR_MOUSE Isoform 2 of DEP domai	29875000	23603000	15848000	2888600	1244800	983450	660330	63353000	75380000	59408000	1	1	1	2.8	2.8	2.8	45.121	0.0014708	2.17	69326000	3	1	1	1	1	1	1	1	1	1	1	1	1
698	B3V097;Q8BIQ5;A2AEK1;B3V099;Q8BIQ5-2;A2AEJ8;A2AEK3;F6ZKC7	B3V097;Q8BIQ5;A2AEK1;B3V099;Q8BIQ5-2	Cleavage stimulation factor subunit 2	Cstf2	tr|B3V097|B3V097_MOUSE BetaCstF-64 variant 3 OS=Mus musculus GN=Cstf2 PE=2 SV=1;sp|Q8BIQ5|CSTF2_MOUSE Cleavage stimulation factor subunit 2 OS=Mus musculus GN=Cstf2 PE=1 SV=2;tr|A2AEK1|A2AEK1_MOUSE AlphaCstF-64 variant 4 OS=Mus musculus GN=Cstf2 PE=2 SV=1;	1265300000	1448000000	1666000000	162190000	46862000	53628000	61703000	1648800000	1894000000	2024400000	13	13	7	33.2	33.2	21.4	66.424	0	33.281	4379200000	41	12	10	10	12	10	10	7	6	6	15	15	11
699	Q571K2;B5B2U1;B5B2U4;B5B2U2;Q3UZ64;P97305-3;P97305-2;P97305	Q571K2;B5B2U1;B5B2U4;B5B2U2;Q3UZ64;P97305-3;P97305-2;P97305	Nuclear factor of activated T-cells, cytoplasmic 3	Nfatc3	tr|Q571K2|Q571K2_MOUSE MKIAA4144 protein (Fragment) OS=Mus musculus GN=Nfatc3 PE=2 SV=1;tr|B5B2U1|B5B2U1_MOUSE Nuclear factor of activated T-cells c3 isoform IAL-Xa OS=Mus musculus GN=Nfatc3 PE=2 SV=1;tr|B5B2U4|B5B2U4_MOUSE Nuclear factor of activated T-ce	0	0	13198000	356710	0	0	356710	0	0	47880000	1	1	1	2.1	2.1	2.1	81.44	0.0018956	2.0272	13198000	1	0	0	1	0	0	1	0	0	1	0	0	1
700	B5THE3	B5THE3		Sis	tr|B5THE3|B5THE3_MOUSE Sucrase-isomaltase OS=Mus musculus GN=Sis PE=2 SV=1	74748000	62012000	50177000	2010100	803740	666800	539540	83533000	64040000	53444000	1	1	1	0.4	0.4	0.4	209.1	0.0069959	1.4786	186940000	5	1	1	1	1	1	1	1	1	1	2	2	1
701	B6YY24;Q3UVG3	B6YY24;Q3UVG3	Protein FAM91A1	D15Ertd621e;Fam91a1	tr|B6YY24|B6YY24_MOUSE DNA segment, Chr 15, ERATO Doi 621, expressed, isoform CRA_a OS=Mus musculus GN=D15Ertd621e PE=2 SV=1;sp|Q3UVG3|F91A1_MOUSE Protein FAM91A1 OS=Mus musculus GN=Fam91a1 PE=2 SV=1	849640000	882530000	781980000	55870000	18881000	19612000	17377000	1549500000	1599500000	1604500000	16	16	16	27.2	27.2	27.2	93.462	0	62.912	2514200000	50	10	12	11	10	12	11	10	12	11	15	18	17
702	B6ZHD0;O70318;Q80UE3;Q3UNQ6;Q80UE5;B6ZHC7;Q80UE4;B6ZHC5;Q811B2;B6ZHC6;Q8C928;Q8CGJ6;Q811C0;Q7TPN6;Q8BSR4;Q9EPM8	B6ZHD0;O70318;Q80UE3;Q3UNQ6;Q80UE5;B6ZHC7;Q80UE4;B6ZHC5;Q811B2;B6ZHC6;Q8C928;Q8CGJ6	Band 4.1-like protein 2	Epb4.1l2;Epb41l2	tr|B6ZHD0|B6ZHD0_MOUSE Erythrocyte protein band 4.1-like 2 OS=Mus musculus GN=Epb4.1l2 PE=2 SV=1;sp|O70318|E41L2_MOUSE Band 4.1-like protein 2 OS=Mus musculus GN=Epb41l2 PE=1 SV=2;tr|Q80UE3|Q80UE3_MOUSE Protein 4.1G OS=Mus musculus GN=Epb4.1l2 PE=2 SV=1;tr	12601000000	12697000000	11244000000	570970000	196890000	198400000	175690000	17112000000	16808000000	16999000000	44	44	40	59	59	55.4	109.89	0	323.31	36542000000	224	41	39	41	41	39	41	37	35	37	76	76	72
703	B7FAU9;Q8BTM8;B9EKP5;B7FAV1;Q6KAM8;Q3U7N9;F6XC15;J3JS91;I7HPX4;F6Z2C0;Q4FZG4;Q8BTM8-2;Q9JJ37;F7AVL7	B7FAU9;Q8BTM8;B9EKP5;B7FAV1;Q6KAM8	Filamin-A	Flna	tr|B7FAU9|B7FAU9_MOUSE Filamin, alpha OS=Mus musculus GN=Flna PE=1 SV=1;sp|Q8BTM8|FLNA_MOUSE Filamin-A OS=Mus musculus GN=Flna PE=1 SV=5;tr|B9EKP5|B9EKP5_MOUSE Filamin, alpha OS=Mus musculus GN=Flna PE=2 SV=1;tr|B7FAV1|B7FAV1_MOUSE Filamin, alpha (Fragment	119550000000	116310000000	106580000000	2267800000	791710000	770270000	705820000	173270000000	170040000000	163510000000	140	140	129	71.8	71.8	68.2	280.5	0	323.31	342440000000	1018	132	131	130	132	131	130	121	121	119	343	330	345
704	B7U582;P17156	B7U582;P17156	Heat shock-related 70 kDa protein 2	Hspa2	tr|B7U582|B7U582_MOUSE Heat shock protein 70-2 OS=Mus musculus PE=3 SV=1;sp|P17156|HSP72_MOUSE Heat shock-related 70 kDa protein 2 OS=Mus musculus GN=Hspa2 PE=1 SV=2	416240000	322000000	321510000	25848000	10152000	7853700	7841700	739610000	671200000	721930000	24	9	9	41.1	19.1	19.1	69.723	0	26.193	1059800000	22	18	19	20	5	5	6	5	5	6	7	7	8
705	Q569Y6;B7ZBY7;E9PY39;Q9CZY3;B7ZBY6;Q9CZY3-2;D3Z6R2	Q569Y6;B7ZBY7;E9PY39;Q9CZY3;B7ZBY6;Q9CZY3-2	Ubiquitin-conjugating enzyme E2 variant 1	Ube2v1;Gm20431	tr|Q569Y6|Q569Y6_MOUSE Ubiquitin-conjugating enzyme E2 variant 1 OS=Mus musculus GN=Ube2v1 PE=2 SV=1;tr|B7ZBY7|B7ZBY7_MOUSE Ubiquitin-conjugating enzyme E2 variant 1 OS=Mus musculus GN=Ube2v1 PE=4 SV=1;tr|E9PY39|E9PY39_MOUSE Protein Gm20431 OS=Mus musculus	0	0	0	0	0	0	0	0	0	0	6	1	1	49.7	10.9	10.9	16.355	0	18.232	0	0	6	6	6	1	1	1	1	1	1	0	0	0
706	B7ZC15;Q3TVE0;Q5ND56	B7ZC15;Q3TVE0;Q5ND56	Protein FAM57A	Fam57a	tr|B7ZC15|B7ZC15_MOUSE Protein FAM57A (Fragment) OS=Mus musculus GN=Fam57a PE=4 SV=1;tr|Q3TVE0|Q3TVE0_MOUSE Family with sequence similarity 57, member A OS=Mus musculus GN=Fam57a PE=2 SV=1;sp|Q5ND56|FA57A_MOUSE Protein FAM57A OS=Mus musculus GN=Fam57a PE=2	0	71563000	0	7951500	0	7951500	0	0	143030000	0	1	1	1	3.5	3.5	3.5	20.148	1	-2	71563000	2	1	1	0	1	1	0	1	1	0	1	1	0
707	B7ZCL8;Q542P4;P70290;Q684Q6;A2AN84;B7ZCL9;Q3THA8;B7ZCM0;B7ZCM1;D6RFD5	B7ZCL8;Q542P4;P70290;Q684Q6;A2AN84	55 kDa erythrocyte membrane protein	Mpp1	tr|B7ZCL8|B7ZCL8_MOUSE 55 kDa erythrocyte membrane protein OS=Mus musculus GN=Mpp1 PE=1 SV=1;tr|Q542P4|Q542P4_MOUSE Membrane protein, palmitoylated OS=Mus musculus GN=Mpp1 PE=2 SV=1;sp|P70290|EM55_MOUSE 55 kDa erythrocyte membrane protein OS=Mus musculus G	1552800000	1243500000	1402400000	144780000	53546000	42879000	48358000	2654400000	2422200000	3101800000	15	15	15	54.9	54.9	54.9	49.784	0	115.35	4198700000	59	13	11	12	13	11	12	13	11	12	19	20	20
708	B7ZCR6;Q6PHP4;Q6ZPW1	B7ZCR6;Q6PHP4;Q6ZPW1		Znf512b	tr|B7ZCR6|B7ZCR6_MOUSE Protein Znf512b OS=Mus musculus GN=Znf512b PE=4 SV=1;tr|Q6PHP4|Q6PHP4_MOUSE MCG140111, isoform CRA_c (Fragment) OS=Mus musculus GN=Znf512b PE=2 SV=1;tr|Q6ZPW1|Q6ZPW1_MOUSE MCG140111, isoform CRA_b (Fragment) OS=Mus musculus GN=Znf512	13734000	94920000	0	1671600	211290	1460300	0	80025000	77912000	0	3	3	3	6.4	6.4	6.4	95.329	0	6.74	108650000	3	1	3	0	1	3	0	1	3	0	1	2	0
709	B7ZCU2;B7ZCU5;Q3TPY5;Q3TMI0;Q6AXD3;B7ZCU4;B7ZCU3;Q3TJR5;Q3TJ64;B7ZCU0;J3QNK8;Q8CBW3-5;Q8CBW3-2;Q8CBW3-4;Q8CBW3-3;Q8CBW3;Q3UAH6;Q3UBL3;Q3UVN6	B7ZCU2;B7ZCU5;Q3TPY5;Q3TMI0;Q6AXD3;B7ZCU4;B7ZCU3;Q3TJR5;Q3TJ64;B7ZCU0;J3QNK8;Q8CBW3-5;Q8CBW3-2;Q8CBW3-4;Q8CBW3-3;Q8CBW3;Q3UAH6	Abl interactor 1	Abi1	tr|B7ZCU2|B7ZCU2_MOUSE Abl interactor 1 OS=Mus musculus GN=Abi1 PE=1 SV=1;tr|B7ZCU5|B7ZCU5_MOUSE Abl interactor 1 OS=Mus musculus GN=Abi1 PE=1 SV=1;tr|Q3TPY5|Q3TPY5_MOUSE Putative uncharacterized protein OS=Mus musculus GN=Abi1 PE=2 SV=1;tr|Q3TMI0|Q3TMI0_M	2176100000	2175200000	2354100000	304790000	98913000	98873000	107010000	3463200000	3279600000	3205900000	17	17	13	48.3	48.3	39.4	43.174	0	69.973	6705400000	55	10	12	14	10	12	14	8	8	11	19	15	21
710	B7ZCV4;B9EID1;Q8BGB8;D6RJJ8;Q8BLS2	B7ZCV4;B9EID1;Q8BGB8	Ubiquinone biosynthesis protein COQ4 homolog, mitochondrial	Coq4	tr|B7ZCV4|B7ZCV4_MOUSE Ubiquinone biosynthesis protein COQ4 homolog, mitochondrial (Fragment) OS=Mus musculus GN=Coq4 PE=3 SV=2;tr|B9EID1|B9EID1_MOUSE Ubiquinone biosynthesis protein COQ4 homolog, mitochondrial OS=Mus musculus GN=Coq4 PE=2 SV=1;sp|Q8BGB8|C	154330000	125060000	156900000	33560000	11871000	9620300	12069000	248470000	199600000	297560000	3	3	3	19.1	19.1	19.1	22.35	0	5.1827	436290000	9	2	2	2	2	2	2	2	2	2	3	3	3
711	B7ZJH7;O55242;B7ZJH9;A2AMS0;B7ZJH6;O55242-2;I4DCY6;B7ZJH8	B7ZJH7;O55242;B7ZJH9;A2AMS0;B7ZJH6;O55242-2;I4DCY6	Sigma non-opioid intracellular receptor 1	Sigmar1	tr|B7ZJH7|B7ZJH7_MOUSE Sigma 1 receptor variant SR-1C OS=Mus musculus GN=Sigmar1 PE=2 SV=1;sp|O55242|SGMR1_MOUSE Sigma non-opioid intracellular receptor 1 OS=Mus musculus GN=Sigmar1 PE=1 SV=1;tr|B7ZJH9|B7ZJH9_MOUSE Sigma 1 receptor variant SR-1E OS=Mus mus	38681000	291880000	583040000	130510000	5525800	41697000	83291000	100080000	391680000	710960000	4	4	4	27.6	27.6	27.6	21.177	0	9.64	913600000	13	2	2	4	2	2	4	2	2	4	2	3	8
712	B7ZMP1;B7ZMP1-2;E9Q1R1	B7ZMP1;B7ZMP1-2	Probable Xaa-Pro aminopeptidase 3	Xpnpep3	sp|B7ZMP1|XPP3_MOUSE Probable Xaa-Pro aminopeptidase 3 OS=Mus musculus GN=Xpnpep3 PE=2 SV=1;sp|B7ZMP1-2|XPP3_MOUSE Isoform 2 of Probable Xaa-Pro aminopeptidase 3 OS=Mus musculus GN=Xpnpep3	70207000	101510000	180330000	11356000	2264700	3274700	5816900	231170000	215970000	251670000	5	5	5	18.8	18.8	18.8	56.677	0	13.285	352050000	13	3	3	5	3	3	5	3	3	5	3	5	5
713	F6UDW0;F6WLR1;B7ZMQ0;Q14AI6-2;Q14AI6;D3YVC8	F6UDW0;F6WLR1;B7ZMQ0;Q14AI6-2;Q14AI6;D3YVC8	RNA pseudouridylate synthase domain-containing protein 3	Rpusd3	tr|F6UDW0|F6UDW0_MOUSE RNA pseudouridylate synthase domain-containing protein 3 (Fragment) OS=Mus musculus GN=Rpusd3 PE=4 SV=1;tr|F6WLR1|F6WLR1_MOUSE RNA pseudouridylate synthase domain-containing protein 3 (Fragment) OS=Mus musculus GN=Rpusd3 PE=4 SV=1;tr	40093000	23079000	0	5264300	3341100	1923300	0	47437000	47468000	0	2	2	2	23	23	23	20.072	0	4.3498	63172000	4	2	1	0	2	1	0	2	1	0	3	1	0
714	B7ZMR9;Q0VEE6;D3YV79;D3YZL3	B7ZMR9;Q0VEE6;D3YV79;D3YZL3	Zinc finger protein 800	Zfp800;Znf800	tr|B7ZMR9|B7ZMR9_MOUSE MCG12507, isoform CRA_a OS=Mus musculus GN=Zfp800 PE=2 SV=1;sp|Q0VEE6|ZN800_MOUSE Zinc finger protein 800 OS=Mus musculus GN=Znf800 PE=1 SV=1;tr|D3YV79|D3YV79_MOUSE Zinc finger protein 800 (Fragment) OS=Mus musculus GN=Zfp800 PE=1 SV	157180000	103930000	162030000	12445000	4622800	3056700	4765400	291300000	286920000	349290000	6	6	6	12.2	12.2	12.2	74.812	0	10.228	423130000	16	4	3	6	4	3	6	4	3	6	5	5	6
715	B7ZMT9;B9EHC3;Q9JME2	B7ZMT9;B9EHC3;Q9JME2	Carbohydrate sulfotransferase 11	Chst11	tr|B7ZMT9|B7ZMT9_MOUSE Uncharacterized protein OS=Mus musculus GN=Chst11 PE=2 SV=1;tr|B9EHC3|B9EHC3_MOUSE Carbohydrate sulfotransferase 11 OS=Mus musculus GN=Chst11 PE=2 SV=1;sp|Q9JME2|CHSTB_MOUSE Carbohydrate sulfotransferase 11 OS=Mus musculus GN=Chst11	34828000	7634100	0	2022000	1658500	363530	0	33118000	17094000	0	2	2	2	9.2	9.2	9.2	41.08	0	5.9245	42462000	2	2	1	0	2	1	0	2	1	0	1	1	0
716	B7ZMU2;F8WI26;E9QJT6;Q68ED3;F6UPY1	B7ZMU2;F8WI26;E9QJT6;Q68ED3	Non-canonical poly(A) RNA polymerase PAPD5	Papd5	tr|B7ZMU2|B7ZMU2_MOUSE Papd5 protein OS=Mus musculus GN=Papd5 PE=2 SV=1;tr|F8WI26|F8WI26_MOUSE Non-canonical poly(A) RNA polymerase PAPD5 OS=Mus musculus GN=Papd5 PE=1 SV=1;tr|E9QJT6|E9QJT6_MOUSE Non-canonical poly(A) RNA polymerase PAPD5 OS=Mus musculus G	109200000	282770000	109740000	13203000	2873700	7441300	2887900	305330000	323240000	258600000	9	9	9	24.1	24.1	24.1	64.8	0	14.799	501710000	17	4	9	5	4	9	5	4	9	5	4	7	6
717	B7ZN02;Q5DTX6	B7ZN02;Q5DTX6	Junctional protein associated with coronary artery disease	9430020K01Rik;Jcad	tr|B7ZN02|B7ZN02_MOUSE MCG55337 OS=Mus musculus GN=9430020K01Rik PE=2 SV=1;sp|Q5DTX6|JCAD_MOUSE Junctional protein associated with coronary artery disease OS=Mus musculus GN=Jcad PE=1 SV=2	145040000	34927000	166600000	4500800	1883600	453590	2163600	226330000	128020000	281520000	9	9	9	11.8	11.8	11.8	144.8	0	20.447	346560000	16	5	3	7	5	3	7	5	3	7	5	3	8
718	B7ZN11;Q8C398	B7ZN11;Q8C398	Phosphatidylinositol-glycan biosynthesis class W protein	Pigw	tr|B7ZN11|B7ZN11_MOUSE Phosphatidylinositol-glycan biosynthesis class W protein OS=Mus musculus GN=Pigw PE=2 SV=1;sp|Q8C398|PIGW_MOUSE Phosphatidylinositol-glycan biosynthesis class W protein OS=Mus musculus GN=Pigw PE=2 SV=1	87096000	88511000	28480000	10741000	4584000	4658500	1498900	142530000	148140000	123350000	3	3	3	5.6	5.6	5.6	56.84	0	5.1514	204090000	7	3	3	2	3	3	2	3	3	2	3	3	1
719	E9Q6I3;B7ZNA0;E9QMY5;Q9QXN0-4;Q9QXN0-2;Q9QXN0-3;Q9QXN0	E9Q6I3;B7ZNA0;E9QMY5;Q9QXN0-4;Q9QXN0-2;Q9QXN0-3;Q9QXN0	Protein Shroom3	Shroom3	tr|E9Q6I3|E9Q6I3_MOUSE Protein Shroom3 OS=Mus musculus GN=Shroom3 PE=4 SV=1;tr|B7ZNA0|B7ZNA0_MOUSE Shroom3 protein OS=Mus musculus GN=Shroom3 PE=2 SV=1;tr|E9QMY5|E9QMY5_MOUSE Protein Shroom3 OS=Mus musculus GN=Shroom3 PE=1 SV=1;sp|Q9QXN0-4|SHRM3_MOUSE Isof	17720000	24851000	21613000	539350	148900	208830	181620	24060000	28441000	28801000	3	3	3	2.7	2.7	2.7	199.96	0	4.52	64183000	7	2	3	2	2	3	2	2	3	2	2	2	3
720	B7ZNA3;Q6GYP7;Q6GYP7-2;Q6GYP7-6;Q6GYP7-4;Q3U5E2;Q6GYP7-5;Q6GYP7-3	B7ZNA3;Q6GYP7;Q6GYP7-2;Q6GYP7-6	Ral GTPase-activating protein subunit alpha-1	Ralgapa1	tr|B7ZNA3|B7ZNA3_MOUSE Garnl1 protein OS=Mus musculus GN=Ralgapa1 PE=2 SV=1;sp|Q6GYP7|RGPA1_MOUSE Ral GTPase-activating protein subunit alpha-1 OS=Mus musculus GN=Ralgapa1 PE=1 SV=1;sp|Q6GYP7-2|RGPA1_MOUSE Isoform 2 of Ral GTPase-activating protein subunit	105210000	57893000	207990000	3711000	1052100	578930	2079900	229530000	203730000	389330000	9	9	9	5.6	5.6	5.6	234.38	0	20.393	371100000	19	5	5	7	5	5	7	5	5	7	5	6	8
721	D3YY34;B7ZNA5;Q8CHP6;E9QPT4;Q8CHP6-2	D3YY34;B7ZNA5;Q8CHP6	Polyhomeotic-like protein 3	Phc3	tr|D3YY34|D3YY34_MOUSE Polyhomeotic-like protein 3 OS=Mus musculus GN=Phc3 PE=1 SV=1;tr|B7ZNA5|B7ZNA5_MOUSE Phc3 protein OS=Mus musculus GN=Phc3 PE=1 SV=1;sp|Q8CHP6|PHC3_MOUSE Polyhomeotic-like protein 3 OS=Mus musculus GN=Phc3 PE=1 SV=2	81027000	47034000	10060000	4455500	2613800	1517200	324520	83328000	81869000	80490000	3	2	2	6.2	4.9	4.9	102.14	0	8.3423	138120000	6	3	2	2	2	1	1	2	1	1	3	2	1
722	B7ZNA7;E9QQ68;Q6A039;Q8K257;G3UWY9;Q921M0;Q76LY3;E9PYB1;E9Q2V7;E9Q8K4;G3UVU5;F6Q3H8;Q8CGA2	B7ZNA7;E9QQ68;Q6A039	TBC1 domain family member 12	Tbc1d12	tr|B7ZNA7|B7ZNA7_MOUSE Tbc1d12 protein OS=Mus musculus GN=Tbc1d12 PE=2 SV=1;tr|E9QQ68|E9QQ68_MOUSE TBC1 domain family member 12 OS=Mus musculus GN=Tbc1d12 PE=1 SV=1;sp|Q6A039|TBC12_MOUSE TBC1 domain family member 12 OS=Mus musculus GN=Tbc1d12 PE=1 SV=2	13641000	0	55606000	1775600	349770	0	1425800	0	0	141730000	3	3	3	6.9	6.9	6.9	67.873	0	3.8325	69247000	3	1	0	2	1	0	2	1	0	2	1	0	2
723	B7ZND6;Q80TZ9;B1AS11	B7ZND6;Q80TZ9	Arginine-glutamic acid dipeptide repeats protein	Rere	tr|B7ZND6|B7ZND6_MOUSE Rere protein OS=Mus musculus GN=Rere PE=2 SV=1;sp|Q80TZ9|RERE_MOUSE Arginine-glutamic acid dipeptide repeats protein OS=Mus musculus GN=Rere PE=1 SV=3	46668000	31156000	22685000	3465800	1609200	1074300	782250	51961000	47534000	41099000	3	3	3	8.9	8.9	8.9	66.588	0.0014686	2.1498	100510000	8	3	2	2	3	2	2	3	2	2	4	2	2
724	B7ZNF6;E9QKH8;O35927-2;O35927;Q3US07;Q3USD8;Q3TPK9	B7ZNF6;E9QKH8;O35927-2;O35927;Q3US07;Q3USD8	Catenin delta-2	Ctnnd2	tr|B7ZNF6|B7ZNF6_MOUSE Ctnnd2 protein OS=Mus musculus GN=Ctnnd2 PE=2 SV=1;tr|E9QKH8|E9QKH8_MOUSE Catenin delta-2 OS=Mus musculus GN=Ctnnd2 PE=1 SV=1;sp|O35927-2|CTND2_MOUSE Isoform 2 of Catenin delta-2 OS=Mus musculus GN=Ctnnd2;sp|O35927|CTND2_MOUSE Cateni	45777000	48391000	0	1345300	653960	691300	0	61256000	89654000	0	3	2	2	3.4	2.6	2.6	132.36	1	-2	94168000	2	1	3	1	1	2	0	1	2	0	1	1	0
725	E9QMU1;J3QNW9;B7ZNG0-2;B7ZNG0	E9QMU1;J3QNW9;B7ZNG0-2;B7ZNG0	Kinesin-like protein;Kinesin-like protein KIF7	Kif7	tr|E9QMU1|E9QMU1_MOUSE Kinesin-like protein KIF7 OS=Mus musculus GN=Kif7 PE=3 SV=1;tr|J3QNW9|J3QNW9_MOUSE Kinesin-like protein KIF7 OS=Mus musculus GN=Kif7 PE=3 SV=1;sp|B7ZNG0-2|KIF7_MOUSE Isoform 2 of Kinesin-like protein KIF7 OS=Mus musculus GN=Kif7;sp|B	46624000	19273000	36257000	1201800	548520	226740	426550	71773000	56889000	84976000	2	2	2	2.4	2.4	2.4	151.54	0	4.2522	102150000	6	1	1	2	1	1	2	1	1	2	1	2	3
726	B7ZNJ5;G3X907;Q9WTS6-2;Q9WTS6;F6RJC1;D3YW49;A2ANL9;A2ANM0;B9EJ72;Q9WTS4;Q9WTS5;Q3UHK6;Q3UHK6-4;Q3UHK6-2;Q3UHK6-3	B7ZNJ5;G3X907;Q9WTS6-2;Q9WTS6;F6RJC1	Teneurin-3	Tenm3	tr|B7ZNJ5|B7ZNJ5_MOUSE Odz3 protein OS=Mus musculus GN=Tenm3 PE=2 SV=1;tr|G3X907|G3X907_MOUSE Odd Oz/ten-m homolog 3 (Drosophila) OS=Mus musculus GN=Tenm3 PE=4 SV=1;sp|Q9WTS6-2|TEN3_MOUSE Isoform 2 of Teneurin-3 OS=Mus musculus GN=Tenm3;sp|Q9WTS6|TEN3_MOUS	4251800000	4376200000	5534900000	99739000	29942000	30819000	38978000	7090300000	7702200000	8008100000	64	64	64	36.2	36.2	36.2	300.98	0	255.63	14163000000	180	52	43	53	52	43	53	52	43	53	55	60	65
727	B7ZNK7;Q3TYD9;P63002;P63002-2	B7ZNK7;Q3TYD9;P63002;P63002-2	Amino-terminal enhancer of split	Aes	tr|B7ZNK7|B7ZNK7_MOUSE Aes protein OS=Mus musculus GN=Aes PE=2 SV=1;tr|Q3TYD9|Q3TYD9_MOUSE Amino-terminal enhancer of split OS=Mus musculus GN=Aes PE=2 SV=1;sp|P63002|AES_MOUSE Amino-terminal enhancer of split OS=Mus musculus GN=Aes PE=1 SV=1;sp|P63002-2|A	205560000	73693000	130610000	45540000	22840000	8188100	14512000	218330000	207430000	369000000	4	4	4	33.7	33.7	33.7	21.871	0	16.303	409860000	10	4	3	3	4	3	3	4	3	3	5	2	3
728	B7ZNK9;Q3UMC0;Q8CH38;Q9Z2U6;D3Z0U5;D6RGM7;D3Z4J2;Q9D3R6-3;Q9D3R6	B7ZNK9;Q3UMC0	Spermatogenesis-associated protein 5	Spata5	tr|B7ZNK9|B7ZNK9_MOUSE Spata5 protein OS=Mus musculus GN=Spata5 PE=2 SV=1;sp|Q3UMC0|SPAT5_MOUSE Spermatogenesis-associated protein 5 OS=Mus musculus GN=Spata5 PE=1 SV=2	9763600000	8101800000	6990100000	414260000	162730000	135030000	116500000	18619000000	18628000000	19525000000	26	26	26	42.3	42.3	42.3	97.267	0	112.36	24855000000	110	20	19	19	20	19	19	20	19	19	33	42	35
729	F7AC41;Q3ULP8;Q91VU7;B7ZNL8;Q69Z76;Q3UQN6;F7CG42;F6XMS4	F7AC41;Q3ULP8;Q91VU7;B7ZNL8;Q69Z76;Q3UQN6		Pus7	tr|F7AC41|F7AC41_MOUSE Protein Pus7 (Fragment) OS=Mus musculus GN=Pus7 PE=4 SV=1;tr|Q3ULP8|Q3ULP8_MOUSE Putative uncharacterized protein OS=Mus musculus GN=Pus7 PE=2 SV=1;tr|Q91VU7|Q91VU7_MOUSE Protein Pus7 OS=Mus musculus GN=Pus7 PE=2 SV=2;tr|B7ZNL8|B7ZNL	1504800000	1349000000	1367200000	108230000	38584000	34589000	35057000	2606900000	2539200000	2763200000	20	20	20	41.7	41.7	41.7	73.279	0	79.078	4221000000	56	12	16	15	12	16	15	12	16	15	18	21	17
730	B7ZNP3;B7ZNP2;Q3V4B5	B7ZNP3;B7ZNP2;Q3V4B5	COMM domain-containing protein 6	Commd6	tr|B7ZNP3|B7ZNP3_MOUSE COMM domain-containing protein 6 OS=Mus musculus GN=Commd6 PE=2 SV=1;tr|B7ZNP2|B7ZNP2_MOUSE COMM domain containing 6 OS=Mus musculus GN=Commd6 PE=2 SV=1;sp|Q3V4B5|COMD6_MOUSE COMM domain-containing protein 6 OS=Mus musculus GN=Commd6	257640000	104880000	65933000	53556000	32204000	13110000	8241600	270260000	296110000	229190000	3	3	3	44.6	44.6	44.6	9.4097	0	5.6942	428450000	4	3	1	1	3	1	1	3	1	1	2	1	1
731	Q9Z2R8;Q3TXB7;F8WI14;B7ZNR0;Q9QX30;Q3TDX7;Q61508-2;Q61508	Q9Z2R8;Q3TXB7;F8WI14;B7ZNR0;Q9QX30;Q3TDX7;Q61508-2;Q61508	Extracellular matrix protein 1	Ecm1	tr|Q9Z2R8|Q9Z2R8_MOUSE Extracellular matrix protein OS=Mus musculus PE=4 SV=1;tr|Q3TXB7|Q3TXB7_MOUSE Putative uncharacterized protein OS=Mus musculus GN=Ecm1 PE=2 SV=1;tr|F8WI14|F8WI14_MOUSE Extracellular matrix protein 1 OS=Mus musculus GN=Ecm1 PE=4 SV=1;	31757000	31931000	0	2122900	1058600	1064400	0	66175000	66381000	0	2	2	2	7.6	7.6	7.6	48.358	0	5.9489	63688000	2	2	2	0	2	2	0	2	2	0	0	2	0
732	B7ZNS3;Q08619;C6EQG6	B7ZNS3;Q08619	Interferon-activable protein 205-B	Mnda;Ifi205b	tr|B7ZNS3|B7ZNS3_MOUSE Mnda protein OS=Mus musculus GN=Mnda PE=2 SV=1;sp|Q08619|IFI5B_MOUSE Interferon-activable protein 205-B OS=Mus musculus GN=Ifi205b PE=1 SV=2	820650000	850330000	786520000	98300000	32826000	34013000	31461000	1386600000	1247100000	1385700000	16	7	2	54.1	25.5	8.7	46.776	0	24.437	2457500000	32	11	14	12	6	7	5	2	2	1	11	12	9
733	B7ZNX2;P53995;A2ATQ5;Q3TP10;Q3UE43	B7ZNX2;P53995;A2ATQ5	Anaphase-promoting complex subunit 1	Anapc1	tr|B7ZNX2|B7ZNX2_MOUSE Anaphase promoting complex subunit 1 OS=Mus musculus GN=Anapc1 PE=2 SV=1;sp|P53995|APC1_MOUSE Anaphase-promoting complex subunit 1 OS=Mus musculus GN=Anapc1 PE=2 SV=2;tr|A2ATQ5|A2ATQ5_MOUSE Anaphase-promoting complex subunit 1 OS=Mus	1472200000	1363600000	1383800000	41779000	14576000	13501000	13701000	2650400000	2576800000	2852300000	36	36	36	27	27	27	215.99	0	120.04	4219600000	88	27	21	27	27	21	27	27	21	27	30	25	33
734	B7ZP20;Q810B6;Q810B6-2	B7ZP20;Q810B6	Rabankyrin-5	Ankfy1	tr|B7ZP20|B7ZP20_MOUSE Ankyrin repeat and FYVE domain containing 1 OS=Mus musculus GN=Ankfy1 PE=2 SV=1;sp|Q810B6|ANFY1_MOUSE Ankyrin repeat and FYVE domain-containing protein 1 OS=Mus musculus GN=Ankfy1 PE=2 SV=2	2469600000	1712700000	1384100000	91254000	40485000	28077000	22691000	3589900000	3352100000	3471000000	26	26	26	31.8	31.8	31.8	128.64	0	207.2	5566500000	93	23	24	20	23	24	20	23	24	20	33	33	27
735	B7ZP24;Q3UK78-2;Q3UK78	B7ZP24;Q3UK78-2;Q3UK78	Polycomb group RING finger protein 5	Pcgf5	tr|B7ZP24|B7ZP24_MOUSE Pcgf5 protein OS=Mus musculus GN=Pcgf5 PE=2 SV=1;sp|Q3UK78-2|PCGF5_MOUSE Isoform 2 of Polycomb group RING finger protein 5 OS=Mus musculus GN=Pcgf5;sp|Q3UK78|PCGF5_MOUSE Polycomb group RING finger protein 5 OS=Mus musculus GN=Pcgf5 P	0	23797000	22089000	3277600	0	1699800	1577800	0	27241000	24999000	1	1	1	4.3	4.3	4.3	29.528	0.0047022	1.7361	45886000	2	0	1	1	0	1	1	0	1	1	0	1	1
736	B7ZP28;Q8C4S8;D3Z1C6	B7ZP28;Q8C4S8	DENN domain-containing protein 2A	Dennd2a	tr|B7ZP28|B7ZP28_MOUSE Dennd2a protein OS=Mus musculus GN=Dennd2a PE=2 SV=1;sp|Q8C4S8|DEN2A_MOUSE DENN domain-containing protein 2A OS=Mus musculus GN=Dennd2a PE=1 SV=1	289740000	212480000	171740000	11824000	5083100	3727800	3013000	490550000	437710000	353530000	8	8	7	13	13	11.9	112.93	0	28.399	673960000	20	6	5	5	6	5	5	5	4	4	7	6	7
737	D6RFD6;B7ZP34;Q8C3B8;E9Q0V1	D6RFD6;B7ZP34;Q8C3B8;E9Q0V1	Protein RFT1 homolog	Rft1	tr|D6RFD6|D6RFD6_MOUSE Protein RFT1 homolog OS=Mus musculus GN=Rft1 PE=4 SV=1;tr|B7ZP34|B7ZP34_MOUSE Rft1 protein OS=Mus musculus GN=Rft1 PE=2 SV=1;sp|Q8C3B8|RFT1_MOUSE Protein RFT1 homolog OS=Mus musculus GN=Rft1 PE=2 SV=2;tr|E9Q0V1|E9Q0V1_MOUSE Protein R	21749000	19376000	16653000	3398700	1279300	1139800	979600	47543000	61941000	62487000	2	2	2	6.8	6.8	6.8	42.529	0.0027449	1.9053	57778000	4	2	1	1	2	1	1	2	1	1	2	1	1
738	B7ZP47;Q65Z40;F6YCH1;G3UXQ2	B7ZP47;Q65Z40;F6YCH1	Wings apart-like protein homolog	Wapal	tr|B7ZP47|B7ZP47_MOUSE Wapal protein OS=Mus musculus GN=Wapal PE=1 SV=1;sp|Q65Z40|WAPL_MOUSE Wings apart-like protein homolog OS=Mus musculus GN=Wapal PE=1 SV=2;tr|F6YCH1|F6YCH1_MOUSE Wings apart-like protein homolog (Fragment) OS=Mus musculus GN=Wapal PE=	1124000000	1002400000	894660000	39751000	14790000	13190000	11772000	2008700000	1804000000	1680300000	26	26	26	33.9	33.9	33.9	133.35	0	84.986	3021100000	52	14	15	16	14	15	16	14	15	16	17	18	17
739	B7ZW94;Q8C3F2-3;Q8C3F2;Q3V3X9;Q8C3F2-2	B7ZW94;Q8C3F2-3;Q8C3F2;Q3V3X9	Constitutive coactivator of PPAR-gamma-like protein 2	Fam120c	tr|B7ZW94|B7ZW94_MOUSE Family with sequence similarity 120, member C OS=Mus musculus GN=Fam120c PE=2 SV=1;sp|Q8C3F2-3|F120C_MOUSE Isoform 3 of Constitutive coactivator of PPAR-gamma-like protein 2 OS=Mus musculus GN=Fam120c;sp|Q8C3F2|F120C_MOUSE Constituti	958180000	842880000	820750000	58263000	21293000	18731000	18239000	1708500000	1768900000	1564900000	18	16	16	25.9	23.9	23.9	119.66	0	45.694	2621800000	53	16	12	16	14	10	14	14	10	14	18	14	21
740	Q545R3;Q3TSR4;Q3TD08;B7ZWC0;Q62433;E9Q514;E9Q0J8;E9PZC7;E9Q7G8;E9Q147;E9Q7V2;E9Q5I8;E9Q3F9;E9PVF3	Q545R3;Q3TSR4;Q3TD08;B7ZWC0;Q62433	Protein NDRG1	Ndrg1	tr|Q545R3|Q545R3_MOUSE N-myc downstream regulated gene 1 OS=Mus musculus GN=Ndrg1 PE=2 SV=1;tr|Q3TSR4|Q3TSR4_MOUSE Putative uncharacterized protein OS=Mus musculus GN=Ndrg1 PE=2 SV=1;tr|Q3TD08|Q3TD08_MOUSE Putative uncharacterized protein OS=Mus musculus G	283240000	225080000	170380000	42419000	17702000	14068000	10649000	323520000	343820000	296710000	5	5	5	20.6	20.6	20.6	43.008	0	30.608	678700000	15	5	4	5	5	4	5	5	4	5	6	5	4
741	B7ZWC4;Q07113;B9EKB8;Q8C2F9;Q8K0J1;Q8C6V9;Q80VF2;Q7TMR1;F6SFP4	B7ZWC4;Q07113;B9EKB8	Cation-independent mannose-6-phosphate receptor	Igf2r	tr|B7ZWC4|B7ZWC4_MOUSE Insulin-like growth factor 2 receptor OS=Mus musculus GN=Igf2r PE=2 SV=1;sp|Q07113|MPRI_MOUSE Cation-independent mannose-6-phosphate receptor OS=Mus musculus GN=Igf2r PE=1 SV=1;tr|B9EKB8|B9EKB8_MOUSE Insulin-like growth factor 2 rece	22669000000	18971000000	16030000000	430370000	169170000	141570000	119630000	32214000000	30787000000	33473000000	83	83	83	49.9	49.9	49.9	273.86	0	323.31	57669000000	357	76	74	69	76	74	69	76	74	69	123	118	116
742	B7ZWL1;Q6ZQ08-2;B2RXR3;Q6ZQ08-3;Q505C5	B7ZWL1;Q6ZQ08-2;B2RXR3	CCR4-NOT transcription complex subunit 1	Cnot1	tr|B7ZWL1|B7ZWL1_MOUSE CCR4-NOT transcription complex subunit 1 OS=Mus musculus GN=Cnot1 PE=2 SV=1;sp|Q6ZQ08-2|CNOT1_MOUSE Isoform 2 of CCR4-NOT transcription complex subunit 1 OS=Mus musculus GN=Cnot1;tr|B2RXR3|B2RXR3_MOUSE Cnot1 protein OS=Mus musculus G	63163000	38622000	57160000	1195100	474910	290390	429770	90499000	143110000	131730000	60	1	1	33.1	1.2	1.2	260.95	1	-2	158940000	5	43	42	49	1	1	1	1	1	1	2	1	2
743	Z4YJR7;E9Q0B0;B7ZWM6;B9EKP8;Q3UTJ2;Q3UTJ2-2;B2RXQ9;D3Z080;Q3UTJ2-3;Q3UTJ2-4;Q3UTJ2-5;F6ZWT0;D3Z203;F7BEU1;Q3UTJ2-6;Q3UTJ2-7	Z4YJR7;E9Q0B0;B7ZWM6;B9EKP8;Q3UTJ2;Q3UTJ2-2;B2RXQ9;D3Z080;Q3UTJ2-3;Q3UTJ2-4;Q3UTJ2-5	Sorbin and SH3 domain-containing protein 2	Sorbs2	tr|Z4YJR7|Z4YJR7_MOUSE Sorbin and SH3 domain-containing protein 2 OS=Mus musculus GN=Sorbs2 PE=1 SV=1;tr|E9Q0B0|E9Q0B0_MOUSE Sorbin and SH3 domain-containing protein 2 OS=Mus musculus GN=Sorbs2 PE=1 SV=1;tr|B7ZWM6|B7ZWM6_MOUSE Sorbin and SH3 domain-contain	56879000	411960000	53615000	7571800	824330	5970400	777030	204690000	195710000	309850000	4	4	4	5.7	5.7	5.7	121.43	0.00015349	2.7561	522450000	8	2	3	3	2	3	3	2	3	3	2	3	3
744	B7ZWN1;Q80WE4-3;Q80WE4-4;Q80WE4;Q80WE4-2	B7ZWN1;Q80WE4-3;Q80WE4-4;Q80WE4;Q80WE4-2	Kinesin-like protein;Kinesin-like protein KIF20B	Kif20b	tr|B7ZWN1|B7ZWN1_MOUSE Kif20b protein OS=Mus musculus GN=Kif20b PE=2 SV=1;sp|Q80WE4-3|KI20B_MOUSE Isoform 3 of Kinesin-like protein KIF20B OS=Mus musculus GN=Kif20b;sp|Q80WE4-4|KI20B_MOUSE Isoform 4 of Kinesin-like protein KIF20B OS=Mus musculus GN=Kif20b;	559150000	693160000	534430000	14889000	4659600	5776300	4453600	948180000	1024300000	1150900000	24	24	24	18.3	18.3	18.3	198.98	0	42.952	1786700000	52	13	17	13	13	17	13	13	17	13	18	18	16
745	H3BK32;F6Z9A1;B7ZWN9;Q6P7W0-2;Q6P7W0;H3BKR4	H3BK32;F6Z9A1;B7ZWN9;Q6P7W0-2;Q6P7W0	Sentrin-specific protease 6	Senp6	tr|H3BK32|H3BK32_MOUSE Sentrin-specific protease 6 (Fragment) OS=Mus musculus GN=Senp6 PE=4 SV=1;tr|F6Z9A1|F6Z9A1_MOUSE Sentrin-specific protease 6 OS=Mus musculus GN=Senp6 PE=4 SV=2;tr|B7ZWN9|B7ZWN9_MOUSE SUMO/sentrin specific peptidase 6, isoform CRA_a O	9729200	13175000	11798000	708200	198550	268870	240770	18172000	0	0	3	3	2	5.9	5.9	4.8	103.7	0.0088914	1.3912	34702000	3	1	1	1	1	1	1	1	0	1	1	1	1
746	B8JJ57;Q3TBW8;B8JJ56;Q3UFX3;J3QN94;Q99PN3-2;Q99PN3;B8JJ53	B8JJ57;Q3TBW8;B8JJ56;Q3UFX3;J3QN94;Q99PN3-2;Q99PN3	Tripartite motif-containing protein 26	Trim26	tr|B8JJ57|B8JJ57_MOUSE Tripartite motif-containing protein 26 (Fragment) OS=Mus musculus GN=Trim26 PE=4 SV=1;tr|Q3TBW8|Q3TBW8_MOUSE Putative uncharacterized protein OS=Mus musculus GN=Trim26 PE=2 SV=1;tr|B8JJ56|B8JJ56_MOUSE Tripartite motif-containing prot	86885000	8593100	19112000	5208600	3949300	390590	868730	0	0	25191000	3	3	3	15.8	15.8	15.8	29.168	0.00075403	2.507	114590000	2	1	1	1	1	1	1	1	1	1	1	0	1
747	B8JJ92;Q52KR6	B8JJ92;Q52KR6		Acin1	tr|B8JJ92|B8JJ92_MOUSE Apoptotic chromatin condensation inducer in the nucleus OS=Mus musculus GN=Acin1 PE=1 SV=1;tr|Q52KR6|Q52KR6_MOUSE Acin1 protein OS=Mus musculus GN=Acin1 PE=1 SV=1	601280000	0	0	16702000	16702000	0	0	601280000	0	0	19	1	1	42.1	1.2	1.2	67.113	1	-2	601280000	1	16	12	14	1	0	0	1	0	0	1	0	0
748	B8JJC1;Q6P1B8;Q8BJ37	B8JJC1;Q6P1B8;Q8BJ37	Tyrosyl-DNA phosphodiesterase 1	Tdp1	tr|B8JJC1|B8JJC1_MOUSE Tyrosyl-DNA phosphodiesterase 1 OS=Mus musculus GN=Tdp1 PE=4 SV=1;tr|Q6P1B8|Q6P1B8_MOUSE Tdp1 protein OS=Mus musculus GN=Tdp1 PE=2 SV=1;sp|Q8BJ37|TYDP1_MOUSE Tyrosyl-DNA phosphodiesterase 1 OS=Mus musculus GN=Tdp1 PE=2 SV=2	579350000	506530000	437750000	36277000	13794000	12060000	10423000	1018700000	1083100000	951020000	11	11	11	25.5	25.5	25.5	68.59	0	38.51	1523600000	36	8	9	8	8	9	8	8	9	8	13	14	9
749	F6TTJ9;B8JJC8;Q9Z0P8;F8VPU0;Q8VCA7;P70210	F6TTJ9;B8JJC8;Q9Z0P8;F8VPU0;Q8VCA7;P70210	Transcriptional enhancer factor TEF-5	Tead3;TEF-5	tr|F6TTJ9|F6TTJ9_MOUSE Transcriptional enhancer factor TEF-5 OS=Mus musculus GN=Tead3 PE=4 SV=1;tr|B8JJC8|B8JJC8_MOUSE Transcriptional enhancer factor TEF-5 OS=Mus musculus GN=Tead3 PE=4 SV=1;tr|Q9Z0P8|Q9Z0P8_MOUSE TEF-5 protein OS=Mus musculus GN=TEF-5 PE	0	0	10730000	631170	0	0	631170	0	0	20706000	3	1	1	12.8	4.5	4.5	41.958	0.0084875	1.4169	10730000	2	2	1	1	0	1	1	0	1	1	0	1	1
750	B8JJI4;Q6QD59;F7C279;F6QGF9	B8JJI4;Q6QD59;F7C279	Vesicle transport protein SEC20	Bnip1	tr|B8JJI4|B8JJI4_MOUSE Vesicle transport protein SEC20 OS=Mus musculus GN=Bnip1 PE=4 SV=1;sp|Q6QD59|SEC20_MOUSE Vesicle transport protein SEC20 OS=Mus musculus GN=Bnip1 PE=2 SV=1;tr|F7C279|F7C279_MOUSE Vesicle transport protein SEC20 (Fragment) OS=Mus musc	243290000	304570000	175260000	60260000	20274000	25381000	14605000	382970000	452410000	245730000	6	6	6	38.1	38.1	38.1	22.391	0	39.09	723120000	17	4	4	5	4	4	5	4	4	5	7	4	6
751	B8JK50;Q8VBW5-4;Q8VBW5-3;Q8VBW5;Q05CK5;Q05D00;Q8VBW5-2	B8JK50;Q8VBW5-4;Q8VBW5-3;Q8VBW5;Q05CK5;Q05D00;Q8VBW5-2	HMG box transcription factor BBX	Bbx	tr|B8JK50|B8JK50_MOUSE HMG box transcription factor BBX OS=Mus musculus GN=Bbx PE=4 SV=1;sp|Q8VBW5-4|BBX_MOUSE Isoform 4 of HMG box transcription factor BBX OS=Mus musculus GN=Bbx;sp|Q8VBW5-3|BBX_MOUSE Isoform 3 of HMG box transcription factor BBX OS=Mus m	99491000	66885000	17914000	4095300	2210900	1486300	398080	208340000	102130000	0	3	3	3	7.4	7.4	7.4	81.782	0	8.014	184290000	5	2	2	1	2	2	1	2	2	1	2	2	1
752	B8JK81;Q3TP05;B8JK87;Q8K371	B8JK81;Q3TP05;B8JK87;Q8K371	Angiomotin-like protein 2	Amotl2	tr|B8JK81|B8JK81_MOUSE Angiomotin-like protein 2 (Fragment) OS=Mus musculus GN=Amotl2 PE=4 SV=1;tr|Q3TP05|Q3TP05_MOUSE Angiomotin-like protein 2 OS=Mus musculus GN=Amotl2 PE=2 SV=1;tr|B8JK87|B8JK87_MOUSE Angiomotin-like protein 2 OS=Mus musculus GN=Amotl2	0	9005200	32367000	1334600	0	290490	1044100	0	35964000	53974000	1	1	1	2.5	2.5	2.5	61.57	0.00030276	2.5519	41372000	2	0	1	1	0	1	1	0	1	1	0	1	1
753	B8QI35;C7G3P1;P60469;F6UYF1	B8QI35;C7G3P1;P60469;F6UYF1	Liprin-alpha-3	Ppfia3	tr|B8QI35|B8QI35_MOUSE Liprin-alpha 3 OS=Mus musculus GN=Ppfia3 PE=1 SV=1;tr|C7G3P1|C7G3P1_MOUSE MKIAA0654 protein (Fragment) OS=Mus musculus GN=Ppfia3 PE=2 SV=1;sp|P60469|LIPA3_MOUSE Liprin-alpha-3 OS=Mus musculus GN=Ppfia3 PE=1 SV=1;tr|F6UYF1|F6UYF1_MOUS	52190000	0	0	669100	669100	0	0	77085000	0	0	5	2	2	5.6	2.6	2.6	133.42	0.0099379	1.3012	52190000	2	4	4	2	1	1	0	1	1	0	2	0	0
754	B8X349;Q58A65-2;Q58A65;Q58A65-6;Q58A65-5;F8WH31;E9PUD1;Q58A65-3;Q58A65-4;Z4YMB8;F6SH61;Q8C7W0;F6WNT4;Q6PA03;A9CQK3	B8X349;Q58A65-2;Q58A65;Q58A65-6;Q58A65-5;F8WH31;E9PUD1;Q58A65-3;Q58A65-4;Z4YMB8;F6SH61;Q8C7W0	C-Jun-amino-terminal kinase-interacting protein 4	Spag9	tr|B8X349|B8X349_MOUSE JNK-interacting leucine zipper protein long form OS=Mus musculus GN=Spag9 PE=2 SV=1;sp|Q58A65-2|JIP4_MOUSE Isoform 2 of C-Jun-amino-terminal kinase-interacting protein 4 OS=Mus musculus GN=Spag9;sp|Q58A65|JIP4_MOUSE C-Jun-amino-termi	4508400000	4677500000	4672400000	179980000	58551000	60747000	60680000	7353300000	7838900000	7920900000	37	37	33	39.1	39.1	36.8	146.13	0	231.75	13858000000	137	25	27	33	25	27	33	22	26	30	47	45	45
755	B8ZXI1;Z4YJE9;B8ZXI1-2	B8ZXI1;Z4YJE9;B8ZXI1-2	Queuine tRNA-ribosyltransferase subunit QTRTD1	Qtrtd1	sp|B8ZXI1|QTRD1_MOUSE Queuine tRNA-ribosyltransferase subunit QTRTD1 OS=Mus musculus GN=Qtrtd1 PE=1 SV=2;tr|Z4YJE9|Z4YJE9_MOUSE Queuine tRNA-ribosyltransferase subunit QTRTD1 OS=Mus musculus GN=Qtrtd1 PE=3 SV=1;sp|B8ZXI1-2|QTRD1_MOUSE Isoform 2 of Queuine	250490000	410590000	153500000	37026000	11386000	18663000	6977300	468730000	528120000	386230000	6	6	6	24.6	24.6	24.6	46.288	0	31.7	814580000	14	3	4	3	3	4	3	3	4	3	5	5	4
756	B9EHM1;Q8BFR1	B9EHM1;Q8BFR1	Zinc finger CCCH-type antiviral protein 1-like	Zc3hav1l	tr|B9EHM1|B9EHM1_MOUSE Zinc finger CCCH-type, antiviral 1-like OS=Mus musculus GN=Zc3hav1l PE=2 SV=1;sp|Q8BFR1|ZCCHL_MOUSE Zinc finger CCCH-type antiviral protein 1-like OS=Mus musculus GN=Zc3hav1l PE=2 SV=1	0	0	0	0	0	0	0	0	0	0	1	1	1	3	3	3	32.831	0.0067236	1.4923	0	1	1	0	0	1	0	0	1	0	0	1	0	0
757	B9EHN0;Q02053	B9EHN0;Q02053	Ubiquitin-like modifier-activating enzyme 1	Uba1	tr|B9EHN0|B9EHN0_MOUSE Ubiquitin-activating enzyme E1, Chr X OS=Mus musculus GN=Uba1 PE=2 SV=1;sp|Q02053|UBA1_MOUSE Ubiquitin-like modifier-activating enzyme 1 OS=Mus musculus GN=Uba1 PE=1 SV=1	78903000000	67718000000	69224000000	3721500000	1360400000	1167600000	1193500000	113870000000	108650000000	108170000000	53	53	42	70.7	70.7	60.3	117.81	0	323.31	215840000000	580	51	47	47	51	47	47	40	37	38	198	191	191
758	E9Q784;B9EHN9;Q8CIK5;Q9CXN5;Q8BHW0;Q9CT50	E9Q784;B9EHN9;Q8CIK5		Zc3h13	tr|E9Q784|E9Q784_MOUSE Protein Zc3h13 OS=Mus musculus GN=Zc3h13 PE=1 SV=1;tr|B9EHN9|B9EHN9_MOUSE Zinc finger CCCH type containing 13 OS=Mus musculus GN=Zc3h13 PE=2 SV=1;tr|Q8CIK5|Q8CIK5_MOUSE Zc3h13 protein (Fragment) OS=Mus musculus GN=Zc3h13 PE=2 SV=1	163560000	210760000	143930000	6478100	2044500	2634500	1799100	293540000	254300000	295270000	13	13	13	8.5	8.5	8.5	203.75	0	26.516	518250000	20	7	9	6	7	9	6	7	9	6	6	9	5
759	Q3UH45;B9EHS4;Q6ZQE1	Q3UH45;B9EHS4;Q6ZQE1		Tecpr2	tr|Q3UH45|Q3UH45_MOUSE Protein Tecpr2 OS=Mus musculus GN=Tecpr2 PE=1 SV=1;tr|B9EHS4|B9EHS4_MOUSE Uncharacterized protein OS=Mus musculus GN=Tecpr2 PE=2 SV=1;tr|Q6ZQE1|Q6ZQE1_MOUSE MKIAA0297 protein (Fragment) OS=Mus musculus GN=Tecpr2 PE=2 SV=1	0	0	13553000	222190	0	0	222190	0	0	29669000	2	2	2	2.2	2.2	2.2	154.94	0.00030298	2.5598	13553000	2	0	0	2	0	0	2	0	0	2	0	0	2
760	Q3URB9;B9EHV0;E9Q6L9;Q80TE7	Q3URB9;B9EHV0;E9Q6L9;Q80TE7	Leucine-rich repeat-containing protein 7	Lrrc7	tr|Q3URB9|Q3URB9_MOUSE Putative uncharacterized protein (Fragment) OS=Mus musculus GN=Lrrc7 PE=2 SV=1;tr|B9EHV0|B9EHV0_MOUSE Lrrc7 protein OS=Mus musculus GN=Lrrc7 PE=2 SV=1;tr|E9Q6L9|E9Q6L9_MOUSE Leucine-rich repeat-containing protein 7 OS=Mus musculus GN	29026000	35734000	183660000	9936600	1161000	1429400	7346200	102590000	129750000	207820000	4	2	2	11.3	6	6	53.777	0.0051165	1.6934	248420000	4	3	2	3	1	1	2	1	1	2	1	1	2
761	B9EHV1;Q9QY06-3;Q3UFX8;Q3TRQ0	B9EHV1;Q9QY06-3	Unconventional myosin-IXb	Myo9b	tr|B9EHV1|B9EHV1_MOUSE Myosin IXb OS=Mus musculus GN=Myo9b PE=2 SV=1;sp|Q9QY06-3|MYO9B_MOUSE Isoform 3 of Unconventional myosin-IXb OS=Mus musculus GN=Myo9b	86487000	19044000	0	844250	691900	152350	0	101290000	26761000	0	44	1	1	32.8	0.6	0.6	222.64	0.0028885	1.902	105530000	4	34	36	27	1	1	0	1	1	0	2	2	0
762	B9EHV2;E9Q3I3;S4R1K5;B1AXI2;Q3TQN9;Q3TDW8;B1AXI4;B1AXI6;E0CYU0;E0CX56;B7ZNJ6;E9PYK8;Q5DU57-2;Q7TNR9;Q3UTH8-2;Q3UTH8-3;Q3UTH8-4;Q3UTH8;Q5DU57	B9EHV2;E9Q3I3		Spata13	tr|B9EHV2|B9EHV2_MOUSE Spata13 protein OS=Mus musculus GN=Spata13 PE=2 SV=1;tr|E9Q3I3|E9Q3I3_MOUSE Spermatogenesis-associated protein 13 OS=Mus musculus GN=Spata13 PE=1 SV=1	0	70044000	20836000	1594400	0	1228800	365540	0	0	34588000	3	3	3	3.4	3.4	3.4	128.1	0	3.6934	90880000	3	0	2	1	0	2	1	0	2	1	0	2	1
763	B9EHX4;Q62388;Q6NX74;Q3UT15;F6UXV2;D3Z0Q2	B9EHX4;Q62388	Serine-protein kinase ATM	Atm	tr|B9EHX4|B9EHX4_MOUSE Ataxia telangiectasia mutated homolog (Human) OS=Mus musculus GN=Atm PE=2 SV=1;sp|Q62388|ATM_MOUSE Serine-protein kinase ATM OS=Mus musculus GN=Atm PE=1 SV=2	791980000	862150000	888310000	13381000	4168300	4537600	4675300	1662300000	1535900000	1707500000	42	42	42	18.6	18.6	18.6	349.07	0	101.32	2542400000	84	23	30	27	23	30	27	23	30	27	24	27	33
764	B9EHY2;Q80W54;I7HIP5	B9EHY2;Q80W54	CAAX prenyl protease 1 homolog	Zmpste24	tr|B9EHY2|B9EHY2_MOUSE Zinc metallopeptidase, STE24 homolog (S. cerevisiae) OS=Mus musculus GN=Zmpste24 PE=2 SV=1;sp|Q80W54|FACE1_MOUSE CAAX prenyl protease 1 homolog OS=Mus musculus GN=Zmpste24 PE=1 SV=2	1992500000	2751700000	2736700000	356230000	94880000	131030000	130320000	3351400000	3177900000	3632400000	16	16	16	36.2	36.2	36.2	54.734	0	118.97	7480900000	59	12	11	14	12	11	14	12	11	14	17	20	22
765	B9EHZ5;Q9JLB0-2;Q3UN60;Q9JLB0;Q6NSS8;Q811G2;Q3TPA2;E9PWC5;Q8BP37;E9Q2R8	B9EHZ5;Q9JLB0-2;Q3UN60;Q9JLB0;Q6NSS8;Q811G2;Q3TPA2;E9PWC5	MAGUK p55 subfamily member 6	Mpp6	tr|B9EHZ5|B9EHZ5_MOUSE Membrane protein, palmitoylated 6 (MAGUK p55 subfamily member 6) OS=Mus musculus GN=Mpp6 PE=2 SV=1;sp|Q9JLB0-2|MPP6_MOUSE Isoform Alpha of MAGUK p55 subfamily member 6 OS=Mus musculus GN=Mpp6;tr|Q3UN60|Q3UN60_MOUSE Membrane protein,	532520000	735800000	431440000	44731000	14014000	19363000	11354000	960170000	1121100000	922160000	16	16	15	38.2	38.2	36	60.924	0	18.013	1699800000	27	11	10	7	11	10	7	11	9	6	9	10	8
766	B9EI21;O54836	B9EI21;O54836	Zinc finger matrin-type protein 3	Zmat3	tr|B9EI21|B9EI21_MOUSE Zinc finger matrin type 3 OS=Mus musculus GN=Zmat3 PE=2 SV=1;sp|O54836|ZMAT3_MOUSE Zinc finger matrin-type protein 3 OS=Mus musculus GN=Zmat3 PE=2 SV=1	92310000	77520000	83018000	15803000	5769400	4845000	5188600	158910000	131430000	152060000	1	1	1	6.6	6.6	6.6	32.05	0	3.3269	252850000	5	1	1	1	1	1	1	1	1	1	2	2	1
767	B9EI57;Q8CH25-2;Q8CH25;Q9CS69	B9EI57;Q8CH25-2;Q8CH25	SAFB-like transcription modulator	Sltm	tr|B9EI57|B9EI57_MOUSE SAFB-like, transcription modulator OS=Mus musculus GN=Sltm PE=2 SV=1;sp|Q8CH25-2|SLTM_MOUSE Isoform 2 of SAFB-like transcription modulator OS=Mus musculus GN=Sltm;sp|Q8CH25|SLTM_MOUSE SAFB-like transcription modulator OS=Mus musculus	1669900000	1906700000	1234600000	94337000	32743000	37387000	24208000	2605300000	3042000000	2785200000	16	16	16	16.5	16.5	16.5	116.92	0	111.12	4811200000	61	13	13	11	13	13	11	13	13	11	21	23	17
768	B9EIA9;Q3U0K9;Q00322	B9EIA9;Q3U0K9;Q00322	CCAAT/enhancer-binding protein delta	Cebpd	tr|B9EIA9|B9EIA9_MOUSE CCAAT/enhancer binding protein (C/EBP), delta OS=Mus musculus GN=Cebpd PE=2 SV=1;tr|Q3U0K9|Q3U0K9_MOUSE Putative uncharacterized protein OS=Mus musculus GN=Cebpd PE=2 SV=1;sp|Q00322|CEBPD_MOUSE CCAAT/enhancer-binding protein delta OS	16052000	0	0	1337700	1337700	0	0	21480000	0	0	1	1	1	4.5	4.5	4.5	28.631	0.00015337	2.7227	16052000	2	1	0	1	1	0	1	1	0	1	1	0	1
769	B9EIE8;Q9DA03;D6RD13	B9EIE8;Q9DA03	Complex III assembly factor LYRM7	Lyrm7	tr|B9EIE8|B9EIE8_MOUSE LYR motif containing 7 OS=Mus musculus GN=Lyrm7 PE=2 SV=1;sp|Q9DA03|LYRM7_MOUSE Complex III assembly factor LYRM7 OS=Mus musculus GN=Lyrm7 PE=2 SV=2	358660000	674000000	568650000	228760000	51237000	96285000	81236000	922020000	949540000	829680000	4	4	4	39.1	39.1	39.1	14.85	0	20.964	1601300000	14	4	4	3	4	4	3	4	4	3	4	5	5
[truncated: 6,672 more rows]
