# Supplementary material for: An efficient method for high-pH peptide fractionation based on C18 StageTips for in-depth proteome profiling
Source: Royal Society of Chemistry journal article supplement (doi:10.1039/c9ay01269a), 2019-01-01
Supplement: c9ay01269a7.xlsx [file c9ay01269a7.xlsx]

## Sheet: supplementary_table_S5
Supplementary Table S5. List of identified protein groups in experiment 3 of triplicate analysis. This list includes the Uniprot accession nubmer, official gene symbol, and protein name of the identified protein groups. Searh results from Maxquant are also described.
No.	Protein IDs	Majority protein IDs	Protein names	Gene names	Fasta headers	Intensity P3_E1	Intensity P3_E2	Intensity P3_E3	iBAQ	iBAQ P3_E1	iBAQ P3_E2	iBAQ P3_E3	LFQ intensity P3_E1	LFQ intensity P3_E2	LFQ intensity P3_E3	Peptides	Razor + unique peptides	Unique peptides	Sequence coverage [%]	Unique + razor sequence coverage [%]	Unique sequence coverage [%]	Mol. weight [kDa]	Q-value	Score	Intensity	MS/MS count	Peptides P3_E1	Peptides P3_E2	Peptides P3_E3	Razor + unique peptides P3_E1	Razor + unique peptides P3_E2	Razor + unique peptides P3_E3	Unique peptides P3_E1	Unique peptides P3_E2	Unique peptides P3_E3	MS/MS count P3_E1	MS/MS count P3_E2	MS/MS count P3_E3
1	A0A023T672;Q9CWZ3-2;Q9CWZ3;Q9CT44	A0A023T672;Q9CWZ3-2;Q9CWZ3	RNA-binding protein 8A	RBM8;Rbm8a	tr|A0A023T672|A0A023T672_MOUSE RNA-binding protein 8A OS=Mus musculus GN=RBM8 PE=1 SV=1;sp|Q9CWZ3-2|RBM8A_MOUSE Isoform 2 of RNA-binding protein 8A OS=Mus musculus GN=Rbm8a;sp|Q9CWZ3|RBM8A_MOUSE RNA-binding protein 8A OS=Mus musculus GN=Rbm8a PE=1 SV=3	2220000000	3576100000	3007100000	1100400000	277500000	447010000	375890000	2136100000	3274600000	2630400000	9	9	9	76.4	76.4	76.4	19.889	0	86.255	8803200000	43	7	9	8	7	9	8	7	9	8	13	17	13
2	A0A023T778;Q9CQL1;G3UYI5;G3UZW7	A0A023T778;Q9CQL1;G3UYI5;G3UZW7	Protein mago nashi homolog 2	Magohb	tr|A0A023T778|A0A023T778_MOUSE Mago nashi protein OS=Mus musculus GN=2010012C16Rik PE=2 SV=1;sp|Q9CQL1|MGN2_MOUSE Protein mago nashi homolog 2 OS=Mus musculus GN=Magohb PE=2 SV=1;tr|G3UYI5|G3UYI5_MOUSE Protein mago nashi homolog 2 (Fragment) OS=Mus musculu	20987000	10776000	10210000	2998100	1499100	769690	729310	20710000	10567000	0	9	1	1	75	6.1	6.1	17.31	0.0020339	2.4188	41973000	3	7	6	7	1	1	1	1	1	1	1	1	1
3	A0A024QYR9;O08586;Q8BSR7;Q3UUN5;Q3UUT8;Q8R5G7-3	A0A024QYR9;O08586;Q8BSR7;Q3UUN5	Phosphatidylinositol 3,4,5-trisphosphate 3-phosphatase and dual-specificity protein phosphatase PTEN	Pten	tr|A0A024QYR9|A0A024QYR9_MOUSE Mitochondrial PTENalpha OS=Mus musculus GN=PTEN PE=2 SV=1;sp|O08586|PTEN_MOUSE Phosphatidylinositol 3,4,5-trisphosphate 3-phosphatase and dual-specificity protein phosphatase PTEN OS=Mus musculus GN=Pten PE=1 SV=1;tr|Q8BSR7|Q	471580000	449480000	492390000	39262000	13100000	12485000	13677000	446430000	492710000	501980000	11	11	10	21.3	21.3	20.3	64.566	0	19.133	1413400000	29	8	8	7	8	8	7	8	8	6	10	9	10
4	A0A067XG52;Q99K51;B1AX58;Q3UKB1;Q3UJG9	A0A067XG52;Q99K51;B1AX58;Q3UKB1;Q3UJG9	Plastin-3	Pls3	tr|A0A067XG52|A0A067XG52_MOUSE Plastin-3 (Fragment) OS=Mus musculus GN=Pls3 PE=4 SV=1;sp|Q99K51|PLST_MOUSE Plastin-3 OS=Mus musculus GN=Pls3 PE=1 SV=3;tr|B1AX58|B1AX58_MOUSE Plastin-3 OS=Mus musculus GN=Pls3 PE=4 SV=1;tr|Q3UKB1|Q3UKB1_MOUSE Putative unchar	41310000000	34845000000	33742000000	2747400000	1032800000	871120000	843540000	37376000000	35337000000	36819000000	44	44	36	71.7	71.7	59.6	70.642	0	323.31	109900000000	300	40	40	41	40	40	41	32	33	33	115	89	96
5	Q8VCR0;G3UXP8;A0A068BES4;A0A068BIV0;A0A068BFV6;A0A068BD65;A0A068BGV8;Q3TWJ1;A0A068BGT5;P28704-2;P28704	Q8VCR0;G3UXP8;A0A068BES4;A0A068BIV0;A0A068BFV6;A0A068BD65;A0A068BGV8;Q3TWJ1;A0A068BGT5;P28704-2;P28704	Retinoic acid receptor RXR-beta	Rxrb	tr|Q8VCR0|Q8VCR0_MOUSE Retinoic acid receptor RXR-beta OS=Mus musculus GN=Rxrb PE=2 SV=1;tr|G3UXP8|G3UXP8_MOUSE Retinoic acid receptor RXR-beta (Fragment) OS=Mus musculus GN=Rxrb PE=3 SV=1;tr|A0A068BES4|A0A068BES4_MOUSE Putative retinoid X receptor beta is	44879000	63698000	17546000	5483600	1951300	2769500	762880	48160000	42462000	34941000	3	2	2	8.7	5.3	5.3	44.839	0.00014977	4.4538	126120000	4	2	3	2	1	2	1	1	2	1	1	2	1
6	F6QHF1;Q5D0F3;Q3TBA3;Q78E61;Q62429;Q62428;Q3U6V4;Q3U543;A0A068BER1;P21958	F6QHF1;Q5D0F3;Q3TBA3;Q78E61;Q62429;Q62428;Q3U6V4;Q3U543;A0A068BER1;P21958	Antigen peptide transporter 1	Tap1	tr|F6QHF1|F6QHF1_MOUSE Antigen peptide transporter 1 (Fragment) OS=Mus musculus GN=Tap1 PE=4 SV=1;tr|Q5D0F3|Q5D0F3_MOUSE Tap1 protein OS=Mus musculus GN=Tap1 PE=2 SV=1;tr|Q3TBA3|Q3TBA3_MOUSE Antigen peptide transporter 1 OS=Mus musculus GN=Tap1 PE=2 SV=1;t	187080000	5207800	22593000	16529000	14391000	400600	1737900	0	0	27215000	3	3	3	20.4	20.4	20.4	20.85	0.0005711	3.3945	214880000	4	2	1	1	2	1	1	2	1	1	2	1	1
7	Q78ZJ8;A0A068BFR3;P46638;G3UY29;E9Q3P9;F8WGS1;G3UZD3;Q3UZ37;G3UZL4;Q9QWU0	Q78ZJ8;A0A068BFR3;P46638;G3UY29;E9Q3P9;F8WGS1;G3UZD3;Q3UZ37;G3UZL4	Ras-related protein Rab-11B	Rab11b;Rab11a	tr|Q78ZJ8|Q78ZJ8_MOUSE MCG22989, isoform CRA_b OS=Mus musculus GN=Rab11b PE=2 SV=1;tr|A0A068BFR3|A0A068BFR3_MOUSE RAS oncogene family protein OS=Mus musculus GN=Rab11b PE=2 SV=1;sp|P46638|RB11B_MOUSE Ras-related protein Rab-11B OS=Mus musculus GN=Rab11b PE	12623000000	12272000000	12780000000	2354800000	788970000	767020000	798780000	12469000000	14306000000	12676000000	12	12	2	55.5	55.5	13.3	24.489	0	92.655	37676000000	80	12	11	11	12	11	11	2	2	2	31	22	27
8	A0A068BFS4;O35730;O35730-2;O35730-3	A0A068BFS4;O35730;O35730-2;O35730-3	E3 ubiquitin-protein ligase RING1	Ring1	tr|A0A068BFS4|A0A068BFS4_MOUSE Ring finger protein 1 OS=Mus musculus GN=Ring1 PE=2 SV=1;sp|O35730|RING1_MOUSE E3 ubiquitin-protein ligase RING1 OS=Mus musculus GN=Ring1 PE=1 SV=2;sp|O35730-2|RING1_MOUSE Isoform 2 of E3 ubiquitin-protein ligase RING1 OS=Mus	90635000	119560000	153350000	20197000	5035300	6642300	8519400	139900000	110300000	117010000	7	5	5	27.3	20	20	42.612	0	11.29	363540000	11	5	5	6	3	3	4	3	3	4	3	4	4
9	A0A068BGT0;Q8C754;Q3V3A4;G3UY33	A0A068BGT0;Q8C754;Q3V3A4;G3UY33	Vacuolar protein sorting-associated protein 52 homolog	Vps52	tr|A0A068BGT0|A0A068BGT0_MOUSE Vacuolar protein sorting 52 OS=Mus musculus GN=Vps52 PE=2 SV=1;sp|Q8C754|VPS52_MOUSE Vacuolar protein sorting-associated protein 52 homolog OS=Mus musculus GN=Vps52 PE=2 SV=1;tr|Q3V3A4|Q3V3A4_MOUSE Putative uncharacterized pr	646480000	759780000	537320000	44172000	14693000	17268000	12212000	604630000	775490000	719400000	15	15	4	30.8	30.8	9.8	82.029	0	75.21	1943600000	37	11	12	9	11	12	9	2	4	4	13	14	10
10	Q3U9A3;Q9D679;Q3TCU5;A0A068BIS1;Q9R233-2;Q9R233;Q5XW52;Q5XW51;Q5XW48;Q5XW49;Q3TED6;Q91WI5;G3UZZ2;Q5XW46;Q8C6N4;Q3U7C1;Q5XW47	Q3U9A3;Q9D679;Q3TCU5;A0A068BIS1;Q9R233-2;Q9R233;Q5XW52;Q5XW51;Q5XW48;Q5XW49;Q3TED6;Q91WI5;G3UZZ2;Q5XW46;Q8C6N4;Q3U7C1	Tapasin	Tapbp	tr|Q3U9A3|Q3U9A3_MOUSE TAP binding protein, isoform CRA_b OS=Mus musculus GN=Tapbp PE=2 SV=1;tr|Q9D679|Q9D679_MOUSE Putative uncharacterized protein OS=Mus musculus GN=Tapbp PE=2 SV=1;tr|Q3TCU5|Q3TCU5_MOUSE Tapasin OS=Mus musculus GN=Tapbp PE=2 SV=1;tr|A0A	141240000	73440000	78013000	13304000	6420000	3338200	3546000	119590000	65092000	101970000	4	4	4	15.9	15.9	15.9	49.736	0	7.6869	292690000	10	3	3	2	3	3	2	3	3	2	3	4	3
11	Q14C53;A0A068BIT0;Q31125	Q14C53;A0A068BIT0;Q31125	Zinc transporter SLC39A7	Slc39a7	tr|Q14C53|Q14C53_MOUSE Solute carrier family 39 (Zinc transporter), member 7 OS=Mus musculus GN=Slc39a7 PE=2 SV=1;tr|A0A068BIT0|A0A068BIT0_MOUSE Solute carrier family 39 OS=Mus musculus GN=Slc39a7 PE=2 SV=1;sp|Q31125|S39A7_MOUSE Zinc transporter SLC39A7 OS	345790000	620680000	469630000	95740000	23052000	41379000	31309000	445110000	536820000	464310000	2	2	2	5.9	5.9	5.9	50.686	0.00016013	6.2231	1436100000	5	1	2	1	1	2	1	1	2	1	0	3	2
12	Q61919;Q60589;Q2HJ08;Q1KYM0;A0A068EVR8;Q04586;P70356;Q61920;Q9R0Y9;E3T928;Q62102;Q61975	Q61919;Q60589;Q2HJ08;Q1KYM0;A0A068EVR8;Q04586;P70356;Q61920		env;Mela	tr|Q61919|Q61919_MOUSE Envelope protein OS=Mus musculus PE=4 SV=1;tr|Q60589|Q60589_MOUSE Envelope glycoprotein OS=Mus musculus GN=env PE=4 SV=1;tr|Q2HJ08|Q2HJ08_MOUSE Melanoma antigen OS=Mus musculus GN=Mela PE=2 SV=1;tr|Q1KYM0|Q1KYM0_MOUSE Env polyprotein	143380000000	140870000000	135030000000	14974000000	5120800000	5030900000	4822600000	153570000000	145150000000	135360000000	26	26	16	36.2	36.2	23.2	73.625	0	323.31	419280000000	472	23	23	24	23	23	24	13	14	14	157	143	172
13	A0A068EW80;Q60953;D3Z3A6;D3YXR5;Q8BSJ6;D3Z2V0	A0A068EW80;Q60953;D3Z3A6;D3YXR5	Protein PML	Pml	tr|A0A068EW80|A0A068EW80_MOUSE Promyelocytic leukemia OS=Mus musculus GN=Pml PE=2 SV=1;sp|Q60953|PML_MOUSE Protein PML OS=Mus musculus GN=Pml PE=1 SV=3;tr|D3Z3A6|D3Z3A6_MOUSE Protein PML OS=Mus musculus GN=Pml PE=1 SV=1;tr|D3YXR5|D3YXR5_MOUSE Protein PML O	3295100000	2683400000	1803400000	165570000	70108000	57093000	38370000	2908800000	2482800000	2585300000	22	22	3	36.6	36.6	6.4	98.241	0	96.092	7781800000	72	20	18	16	20	18	16	3	2	2	25	25	22
14	A0A068F126	A0A068F126			tr|A0A068F126|A0A068F126_MOUSE Glyco-gag polyprotein OS=Mus musculus PE=4 SV=1	23281000000	21150000000	19015000000	2265900000	831450000	755340000	679110000	22107000000	20573000000	22825000000	30	8	6	61.6	15	13	70.068	0	124.34	63445000000	67	26	28	25	8	8	8	6	6	6	23	22	22
15	A0A075B670;Q3UM84;F6UTR6;P70390-2;P70390	A0A075B670;Q3UM84;F6UTR6;P70390-2;P70390	Short stature homeobox protein 2	Shox2	tr|A0A075B670|A0A075B670_MOUSE Short stature homeobox protein 2 OS=Mus musculus GN=Shox2 PE=4 SV=1;tr|Q3UM84|Q3UM84_MOUSE Putative uncharacterized protein (Fragment) OS=Mus musculus GN=Shox2 PE=2 SV=1;tr|F6UTR6|F6UTR6_MOUSE Short stature homeobox protein 2	0	0	0	0	0	0	0	0	0	0	1	1	1	5.9	5.9	5.9	23.977	1	-2	0	0	0	1	0	0	1	0	0	1	0	0	0	0
16	D3Z1J2;A0AUP1	D3Z1J2;A0AUP1	Coiled-coil domain-containing protein 112	Ccdc112	tr|D3Z1J2|D3Z1J2_MOUSE Coiled-coil domain-containing protein 112 OS=Mus musculus GN=Ccdc112 PE=4 SV=2;sp|A0AUP1|CC112_MOUSE Coiled-coil domain-containing protein 112 OS=Mus musculus GN=Ccdc112 PE=2 SV=2	4042300	5975800	4986300	484010	130400	192770	160850	5855800	7543800	5075600	1	1	1	1.5	1.5	1.5	60.993	0.0081322	1.6299	15004000	3	1	1	1	1	1	1	1	1	1	1	1	1
17	A0AUV1;A3KPD0;B2RVF0;A2AB79;Q8CGP6;Q8R1M2;Q8CGP7;Q8CGP5;Q8BFU2;P22752;Q8CGP4;Q61668	A0AUV1;A3KPD0;B2RVF0;A2AB79;Q8CGP6;Q8R1M2;Q8CGP7;Q8CGP5;Q8BFU2;P22752;Q8CGP4	Histone H2A;Histone H2A type 1-H;Histone H2A.J;Histone H2A type 1-K;Histone H2A type 1-F;Histone H2A type 3;Histone H2A type 1	Hist1h2ah;Hist1h2ad;Hist3h2a;H2afj;Hist1h2ak;Hist1h2af;Hist1h2ab;Hist1h2aa	tr|A0AUV1|A0AUV1_MOUSE Histone H2A (Fragment) OS=Mus musculus GN=Hist1h2ah PE=2 SV=1;tr|A3KPD0|A3KPD0_MOUSE Histone H2A OS=Mus musculus GN=Hist1h2ah PE=2 SV=1;tr|B2RVF0|B2RVF0_MOUSE Histone H2A OS=Mus musculus GN=Hist1h2ad PE=2 SV=1;tr|A2AB79|A2AB79_MOUSE	0	0	0	0	0	0	0	0	0	0	7	2	1	59.1	23.6	8.7	13.819	0	36.165	0	0	7	7	7	2	2	2	1	1	1	0	0	0
18	A0ELI5;Q8K2D3;D6RCX6;D3YYS4	A0ELI5;Q8K2D3	Enhancer of mRNA-decapping protein 3	Edc3	tr|A0ELI5|A0ELI5_MOUSE Putative uncharacterized protein OS=Mus musculus GN=Edc3 PE=4 SV=1;sp|Q8K2D3|EDC3_MOUSE Enhancer of mRNA-decapping protein 3 OS=Mus musculus GN=Edc3 PE=1 SV=1	602780000	684080000	725160000	64904000	19444000	22067000	23392000	805450000	780370000	589030000	15	15	15	42.1	42.1	42.1	55.957	0	53.074	2012000000	40	10	12	12	10	12	12	10	12	12	13	13	14
19	Q3UTU7;K4DI67;A0EQY3;Q6ZQK0;Q80W41	Q3UTU7;K4DI67;A0EQY3;Q6ZQK0;Q80W41	Condensin-2 complex subunit D3	Ncapd3	tr|Q3UTU7|Q3UTU7_MOUSE Putative uncharacterized protein OS=Mus musculus GN=Ncapd3 PE=2 SV=1;tr|K4DI67|K4DI67_MOUSE Condensin-2 complex subunit D3 OS=Mus musculus GN=Ncapd3 PE=4 SV=1;tr|A0EQY3|A0EQY3_MOUSE Jacobsen syndrome region 2 protein OS=Mus musculus	1235900000	3131100000	1189400000	71236000	15845000	40143000	15248000	1906300000	2001200000	1582200000	31	31	31	29.5	29.5	29.5	169.39	0	117.96	5556400000	73	20	23	24	20	23	24	20	23	24	22	24	27
20	A0JLQ7;Q8BFV2;Q8BNM3;E9Q1H5;E9Q5V9	A0JLQ7;Q8BFV2;Q8BNM3	PCI domain-containing protein 2	Pcid2	tr|A0JLQ7|A0JLQ7_MOUSE Pcid2 protein (Fragment) OS=Mus musculus GN=Pcid2 PE=2 SV=1;sp|Q8BFV2|PCID2_MOUSE PCI domain-containing protein 2 OS=Mus musculus GN=Pcid2 PE=2 SV=1;tr|Q8BNM3|Q8BNM3_MOUSE Putative uncharacterized protein OS=Mus musculus GN=Pcid2 PE=	832980000	989890000	457150000	76001000	27766000	32996000	15238000	753590000	858600000	734850000	15	15	15	43.6	43.6	43.6	47.018	0	74.257	2280000000	38	11	12	11	11	12	11	11	12	11	11	13	14
21	A0JNY3;Q8BUV3;Q571C2	A0JNY3;Q8BUV3	Gephyrin;Molybdopterin adenylyltransferase;Molybdopterin molybdenumtransferase	Gphn	tr|A0JNY3|A0JNY3_MOUSE Gephyrin OS=Mus musculus GN=Gphn PE=1 SV=1;sp|Q8BUV3|GEPH_MOUSE Gephyrin OS=Mus musculus GN=Gphn PE=1 SV=2	2005700000	1632000000	1123700000	101310000	42675000	34723000	23908000	1544600000	1530900000	1782700000	19	19	19	36.7	36.7	36.7	83.665	0	96.719	4761400000	54	15	16	11	15	16	11	15	16	11	18	22	14
22	A0JNY7;G3XA17;Q62448;F7CBP1;Q62448-2;Q3U9U9;Q3URI0;F6TW20;F7DAB1;F6UU81	A0JNY7;G3XA17;Q62448;F7CBP1;Q62448-2;Q3U9U9;Q3URI0	Eukaryotic translation initiation factor 4 gamma 2	Eif4g2	tr|A0JNY7|A0JNY7_MOUSE Eukaryotic translation initiation factor 4, gamma 2 OS=Mus musculus GN=Eif4g2 PE=2 SV=1;tr|G3XA17|G3XA17_MOUSE Eukaryotic translation initiation factor 4 gamma 2 OS=Mus musculus GN=Eif4g2 PE=1 SV=1;sp|Q62448|IF4G2_MOUSE Eukaryotic tr	12286000000	13310000000	12632000000	682660000	219400000	237680000	225580000	13298000000	13740000000	13446000000	48	48	48	56.1	56.1	56.1	102.13	0	323.31	38229000000	230	41	42	40	41	42	40	41	42	40	78	75	77
23	A0JNZ1;Q8BTI9;Q9CTK7;Q3TNJ8;Q8CFF1;S4R1S1;B0QZL5;Q546P7;Q3UDT3;Q8CI98;Q3TBW3;Q8BS14;Q3T9Y0;O35904	A0JNZ1;Q8BTI9;Q9CTK7;Q3TNJ8	Phosphatidylinositol 4,5-bisphosphate 3-kinase catalytic subunit beta isoform	Pik3cb	tr|A0JNZ1|A0JNZ1_MOUSE Pik3cb protein OS=Mus musculus GN=Pik3cb PE=2 SV=1;sp|Q8BTI9|PK3CB_MOUSE Phosphatidylinositol 4,5-bisphosphate 3-kinase catalytic subunit beta isoform OS=Mus musculus GN=Pik3cb PE=1 SV=2;tr|Q9CTK7|Q9CTK7_MOUSE Putative uncharacterize	47744000	230610000	23760000	4795400	757850	3660400	377140	0	150480000	125310000	6	6	6	7.9	7.9	7.9	119.64	0.00015748	5.7515	302110000	7	2	3	2	2	3	2	2	3	2	2	3	2
24	A0JP53;D3YXJ0	A0JP53;D3YXJ0	Diacylglycerol kinase	Dgkh	tr|A0JP53|A0JP53_MOUSE Diacylglycerol kinase OS=Mus musculus GN=Dgkh PE=2 SV=1;tr|D3YXJ0|D3YXJ0_MOUSE Diacylglycerol kinase OS=Mus musculus GN=Dgkh PE=3 SV=1	36828000	140370000	0	2953300	613800	2339500	0	57931000	112010000	0	5	5	4	8.5	8.5	7	119.87	0	10.34	177200000	6	2	4	0	2	4	0	2	3	0	2	4	0
25	A0MNP4;Q9ERF3;Q8BVQ0;D6RDC7;D6RJ72;Q8BKW0	A0MNP4;Q9ERF3;Q8BVQ0;D6RDC7	WD repeat-containing protein 61;WD repeat-containing protein 61, N-terminally processed	Wdr61	tr|A0MNP4|A0MNP4_MOUSE CDW13/WDR61 OS=Mus musculus GN=Wdr61 PE=2 SV=1;sp|Q9ERF3|WDR61_MOUSE WD repeat-containing protein 61 OS=Mus musculus GN=Wdr61 PE=2 SV=1;tr|Q8BVQ0|Q8BVQ0_MOUSE WD repeat-containing protein 61 OS=Mus musculus GN=Wdr61 PE=2 SV=1;tr|D6RD	3568300000	3546200000	2667300000	652120000	237890000	236410000	177820000	3551500000	3128300000	3304800000	15	15	15	67.5	67.5	67.5	33.772	0	62.422	9781700000	77	12	13	10	12	13	10	12	13	10	30	26	21
26	A0PJ68;Q8C4Q1;Q3U155	A0PJ68;Q8C4Q1;Q3U155	Coiled-coil domain-containing protein 174	Ccdc174	tr|A0PJ68|A0PJ68_MOUSE C130022K22Rik protein (Fragment) OS=Mus musculus GN=Ccdc174 PE=2 SV=1;tr|Q8C4Q1|Q8C4Q1_MOUSE Putative uncharacterized protein OS=Mus musculus GN=Ccdc174 PE=2 SV=1;sp|Q3U155|CC174_MOUSE Coiled-coil domain-containing protein 174 OS=Mus	13283000	15089000	85263000	7102100	830180	943050	5328900	10882000	14142000	0	2	2	2	6.8	6.8	6.8	31.43	0.0024308	2.3257	113630000	3	1	1	1	1	1	1	1	1	1	1	1	1
27	A0PJC8;A2A3Z2;A2A3Z3;Q8BN78	A0PJC8;A2A3Z2;A2A3Z3;Q8BN78	Transcriptional regulator Kaiso	Zbtb33	tr|A0PJC8|A0PJC8_MOUSE Zbtb33 protein (Fragment) OS=Mus musculus GN=Zbtb33 PE=2 SV=1;tr|A2A3Z2|A2A3Z2_MOUSE Transcriptional regulator Kaiso (Fragment) OS=Mus musculus GN=Zbtb33 PE=4 SV=1;tr|A2A3Z3|A2A3Z3_MOUSE Zinc finger and BTB domain containing 33 OS=Mu	123520000	60539000	43284000	8420000	4574700	2242200	1603100	93341000	81529000	62796000	6	6	6	16.5	16.5	16.5	61.007	0	17.013	227340000	9	5	3	2	5	3	2	5	3	2	4	3	2
28	A0PK78;Q78PG9	A0PK78;Q78PG9	Coiled-coil domain-containing protein 25	Ccdc25	tr|A0PK78|A0PK78_MOUSE Coiled-coil domain containing 25 OS=Mus musculus GN=Ccdc25 PE=2 SV=1;sp|Q78PG9|CCD25_MOUSE Coiled-coil domain-containing protein 25 OS=Mus musculus GN=Ccdc25 PE=1 SV=1	291150000	321140000	203120000	50963000	18197000	20071000	12695000	293790000	282750000	224340000	5	5	5	26.4	26.4	26.4	24.48	0	20.361	815410000	16	4	5	4	4	5	4	4	5	4	5	7	4
29	E9PYF4;A0T1J8;Q6ZQ32;E9PYI7;Q3UPW3;E0CZD8	E9PYF4;A0T1J8;Q6ZQ32;E9PYI7		Lmo7	tr|E9PYF4|E9PYF4_MOUSE Protein Lmo7 OS=Mus musculus GN=Lmo7 PE=1 SV=1;tr|A0T1J8|A0T1J8_MOUSE LIM domain only 7 OS=Mus musculus GN=Lmo7 PE=2 SV=1;tr|Q6ZQ32|Q6ZQ32_MOUSE MKIAA0858 protein (Fragment) OS=Mus musculus GN=Lmo7 PE=2 SV=1;tr|E9PYI7|E9PYI7_MOUSE Pr	2489200000	2203200000	2689100000	63634000	21459000	18993000	23182000	2589300000	2369700000	2518900000	30	30	3	25.7	25.7	2.3	192.55	0	179.52	7381500000	90	23	24	26	23	24	26	2	3	2	30	28	32
30	A2A8Y5;A0ZV96;Q8BHW2	A2A8Y5;A0ZV96;Q8BHW2	Protein OSCP1	Oscp1	tr|A2A8Y5|A2A8Y5_MOUSE Organic solute carrier 1 (Fragment) OS=Mus musculus GN=Oscp1 PE=2 SV=1;tr|A0ZV96|A0ZV96_MOUSE Organic solute carrier protein 1 isoform OS=Mus musculus GN=Oscp1 PE=2 SV=1;sp|Q8BHW2|OSCP1_MOUSE Protein OSCP1 OS=Mus musculus GN=Oscp1 PE	231910000	142220000	96185000	15677000	7730300	4740600	3206200	205400000	115640000	140660000	5	5	5	18.7	18.7	18.7	43.231	0	18.062	470310000	12	4	4	3	4	4	3	4	4	3	4	4	4
31	E9QAE3;A0ZVB6;Q52KH4;Q8BTS9	E9QAE3;A0ZVB6;Q52KH4		Btaf1	tr|E9QAE3|E9QAE3_MOUSE Protein Btaf1 OS=Mus musculus GN=Btaf1 PE=4 SV=1;tr|A0ZVB6|A0ZVB6_MOUSE TBP-associated factor 170 OS=Mus musculus GN=Btaf1 PE=2 SV=1;tr|Q52KH4|Q52KH4_MOUSE Btaf1 protein (Fragment) OS=Mus musculus GN=Btaf1 PE=2 SV=1	3350000000	2872700000	2348700000	85714000	33500000	28727000	23487000	3176400000	3071900000	2786100000	46	46	46	33.9	33.9	33.9	207.05	0	227.86	8571400000	131	38	33	34	38	33	34	38	33	34	49	43	39
32	A1A4T2;Q8BHN3-2;Q3UE86;Q8BHN3-3;Q9R1N7;REV__D6REU9;REV__Q5ERC7;REV__B9EHN5;REV__B7ZNE4;REV__Q7TSP0;REV__Q3T9X0;Q5DU67;A2AQJ8;Q8BVW0	A1A4T2;Q8BHN3-2;Q3UE86;Q8BHN3-3	Neutral alpha-glucosidase AB	Ganab	tr|A1A4T2|A1A4T2_MOUSE Alpha glucosidase 2 alpha neutral subunit OS=Mus musculus GN=Ganab PE=2 SV=1;sp|Q8BHN3-2|GANAB_MOUSE Isoform 2 of Neutral alpha-glucosidase AB OS=Mus musculus GN=Ganab;tr|Q3UE86|Q3UE86_MOUSE Putative uncharacterized protein (Fragment	45710000000	44506000000	44218000000	2317800000	788110000	767350000	762370000	49670000000	42988000000	46563000000	48	48	2	53.5	53.5	4.2	109.4	0	323.31	134430000000	422	41	45	41	41	45	41	1	2	1	138	143	141
33	A1A553;Q5DTS2;O55098;Q3UG53	A1A553;Q5DTS2;O55098;Q3UG53	Serine/threonine-protein kinase 10	Stk10	tr|A1A553|A1A553_MOUSE Serine/threonine kinase 10 OS=Mus musculus GN=Stk10 PE=2 SV=1;tr|Q5DTS2|Q5DTS2_MOUSE MKIAA4026 protein (Fragment) OS=Mus musculus GN=Stk10 PE=2 SV=1;sp|O55098|STK10_MOUSE Serine/threonine-protein kinase 10 OS=Mus musculus GN=Stk10 PE	67814000	54779000	6152200	2429200	1279500	1033600	116080	41426000	67900000	13822000	8	6	6	10.4	8.3	8.3	111.94	0.00015833	5.8886	128750000	9	5	5	3	3	4	2	3	4	2	2	5	2
34	G3UX50;Q5XW53;Q3U0Z3;A1A558;Q3UKR0;Q3UIV3;Q5XW54;Q5XW59;A0A068BEP5;Q5XLB0;O35613;Q5XW58;Q5XW57;G3UWI4;G3UWJ9	G3UX50;Q5XW53;Q3U0Z3;A1A558;Q3UKR0;Q3UIV3;Q5XW54;Q5XW59;A0A068BEP5;Q5XLB0;O35613	Death domain-associated protein 6	Daxx	tr|G3UX50|G3UX50_MOUSE Death domain-associated protein 6 OS=Mus musculus GN=Daxx PE=4 SV=1;tr|Q5XW53|Q5XW53_MOUSE Death domain-associated protein (Fragment) OS=Mus musculus GN=Daxx PE=2 SV=1;tr|Q3U0Z3|Q3U0Z3_MOUSE Putative uncharacterized protein OS=Mus mu	163610000	608860000	116400000	31745000	5843100	21745000	4157300	231660000	390150000	219140000	9	9	9	21.8	21.8	21.8	77.208	0	18.308	888870000	15	6	4	3	6	4	3	6	4	3	7	4	4
35	A2BD48;A2VCT6;E9PWX7;A1A5B6;S4R2S6	A2BD48;A2VCT6;E9PWX7;A1A5B6;S4R2S6	TBC1 domain family member 25	Tbc1d25	tr|A2BD48|A2BD48_MOUSE Tbc1d25 protein (Fragment) OS=Mus musculus GN=Tbc1d25 PE=2 SV=1;tr|A2VCT6|A2VCT6_MOUSE Tbc1d25 protein (Fragment) OS=Mus musculus GN=Tbc1d25 PE=2 SV=1;tr|E9PWX7|E9PWX7_MOUSE TBC1 domain family member 25 OS=Mus musculus GN=Tbc1d25 PE=	62172000	140480000	129770000	10388000	1942900	4389900	4055400	85957000	114900000	161870000	6	6	6	14.4	14.4	14.4	79.571	0	24.217	332420000	11	2	6	4	2	6	4	2	6	4	1	6	4
36	A1BN54;Q9JI91;Q5FW75;Q8K3Q4;D3YY95;Q9CTH3;Q3UYE4	A1BN54		Actn1	tr|A1BN54|A1BN54_MOUSE Alpha actinin 1a OS=Mus musculus GN=Actn1 PE=2 SV=1	16656000	0	0	287180	287180	0	0	19647000	0	0	61	1	1	76.9	1.9	1.9	102.72	0.00014747	4.1444	16656000	1	54	57	55	1	0	0	1	0	0	1	0	0
37	A1E5T5;P51807;Q9DAS3;Q5EBK8;Q9CT63	A1E5T5;P51807;Q9DAS3;Q5EBK8	Dynein light chain Tctex-type 1	Dynlt1	tr|A1E5T5|A1E5T5_MOUSE Tctex-1 OS=Mus musculus PE=2 SV=1;sp|P51807|DYLT1_MOUSE Dynein light chain Tctex-type 1 OS=Mus musculus GN=Dynlt1 PE=1 SV=1;tr|Q9DAS3|Q9DAS3_MOUSE Putative uncharacterized protein OS=Mus musculus PE=2 SV=1;tr|Q5EBK8|Q5EBK8_MOUSE Dynl	1362900000	1385200000	1380500000	688110000	227140000	230870000	230090000	1288600000	1275700000	1501700000	5	5	5	79.6	79.6	79.6	12.482	0	57.517	4128600000	23	5	5	5	5	5	5	5	5	5	9	7	7
38	A1ILG8;Q8BX70-3;Q8BX70;Q8BX70-2;A1ILH3;A1ILH1;A1ILH0;A1ILG9;A1ILH2	A1ILG8;Q8BX70-3;Q8BX70;Q8BX70-2	Vacuolar protein sorting-associated protein 13C	Vps13c	tr|A1ILG8|A1ILG8_MOUSE Chorein OS=Mus musculus GN=Vps13c PE=2 SV=1;sp|Q8BX70-3|VP13C_MOUSE Isoform 3 of Vacuolar protein sorting-associated protein 13C OS=Mus musculus GN=Vps13c;sp|Q8BX70|VP13C_MOUSE Vacuolar protein sorting-associated protein 13C OS=Mus m	3182300000	3458800000	3001200000	44231000	14597000	15866000	13767000	3034600000	3469800000	3437600000	84	84	83	31.5	31.5	31.5	420.08	0	241.56	9642300000	184	55	58	55	55	58	55	55	57	54	61	62	61
39	A1L013;Q9CS00	A1L013;Q9CS00	Cactin	Cactin	tr|A1L013|A1L013_MOUSE Cactin OS=Mus musculus GN=Cactin PE=2 SV=1;sp|Q9CS00|CATIN_MOUSE Cactin OS=Mus musculus GN=Cactin PE=1 SV=2	148820000	395200000	197450000	20597000	4134000	10978000	5484700	223940000	338520000	218860000	12	12	12	22.9	22.9	22.9	90.66	0	27.512	741480000	18	4	11	4	4	11	4	4	11	4	4	10	4
40	A1L0U3;B9EI85;P84228;F8WI35	A1L0U3;B9EI85;P84228;F8WI35	Histone H3;Histone H3.2	Hist1h3e;Hist2h3b;Hist1h3b;H3f3a	tr|A1L0U3|A1L0U3_MOUSE Histone H3 (Fragment) OS=Mus musculus GN=Hist1h3e PE=2 SV=1;tr|B9EI85|B9EI85_MOUSE Histone H3 OS=Mus musculus GN=Hist2h3b PE=2 SV=1;sp|P84228|H32_MOUSE Histone H3.2 OS=Mus musculus GN=Hist1h3b PE=1 SV=2;tr|F8WI35|F8WI35_MOUSE Histone	93525000000	75368000000	100330000000	44871000000	15587000000	12561000000	16722000000	81236000000	73841000000	89850000000	8	8	1	54.9	54.9	24.1	15.029	0	62.588	269230000000	339	8	7	8	8	7	8	1	1	1	116	107	116
41	A1L0U6;A2AS98;P28660;P28660-2;Q3UDY0;Q8K1X4	A1L0U6;A2AS98;P28660;P28660-2	Nck-associated protein 1	Nckap1	tr|A1L0U6|A1L0U6_MOUSE Nckap1 protein (Fragment) OS=Mus musculus GN=Nckap1 PE=2 SV=1;tr|A2AS98|A2AS98_MOUSE Nck-associated protein 1 OS=Mus musculus GN=Nckap1 PE=4 SV=1;sp|P28660|NCKP1_MOUSE Nck-associated protein 1 OS=Mus musculus GN=Nckap1 PE=1 SV=2;sp|P	8575900000	8139900000	7151600000	367190000	131940000	125230000	110020000	8873100000	8265900000	8010700000	42	42	42	43.3	43.3	43.3	129.38	0	243.26	23867000000	186	40	37	37	40	37	37	40	37	37	61	57	68
42	A1L0V4;P68433	A1L0V4;P68433	Histone H3;Histone H3.1	Hist1h3i;Hist1h3a	tr|A1L0V4|A1L0V4_MOUSE Histone H3 (Fragment) OS=Mus musculus GN=Hist1h3i PE=2 SV=1;sp|P68433|H31_MOUSE Histone H3.1 OS=Mus musculus GN=Hist1h3a PE=1 SV=2	0	0	0	0	0	0	0	0	0	0	8	1	1	54.1	23.7	23.7	15.273	0	35.601	0	0	8	7	8	1	1	1	1	1	1	0	0	0
43	A1L0V6;A7YY79;Q6Q899;Q3KQQ7;Q05CC6;A2AP29;Q3U1I9;Q6Q899-2;Q6Q899-3;Q8C6Y8;Q6Q899-4	A1L0V6;A7YY79;Q6Q899;Q3KQQ7;Q05CC6;A2AP29;Q3U1I9	Probable ATP-dependent RNA helicase DDX58	Ddx58	tr|A1L0V6|A1L0V6_MOUSE Ddx58 protein (Fragment) OS=Mus musculus GN=Ddx58 PE=2 SV=1;tr|A7YY79|A7YY79_MOUSE Ddx58 protein (Fragment) OS=Mus musculus GN=Ddx58 PE=2 SV=1;sp|Q6Q899|DDX58_MOUSE Probable ATP-dependent RNA helicase DDX58 OS=Mus musculus GN=Ddx58 P	953670000	973930000	857700000	53563000	18340000	18729000	16494000	946950000	884870000	1072600000	17	17	17	25	25	25	105.68	0	78.992	2785300000	51	13	14	12	13	14	12	13	14	12	19	17	15
44	A1L2Z0;Q920F6;Q8BZI2;Q6WIZ7	A1L2Z0;Q920F6;Q8BZI2;Q6WIZ7	Structural maintenance of chromosomes protein;Structural maintenance of chromosomes protein 1B	Smc1b;Svs1	tr|A1L2Z0|A1L2Z0_MOUSE Structural maintenance of chromosomes protein OS=Mus musculus GN=Smc1b PE=2 SV=1;sp|Q920F6|SMC1B_MOUSE Structural maintenance of chromosomes protein 1B OS=Mus musculus GN=Smc1b PE=1 SV=1;tr|Q8BZI2|Q8BZI2_MOUSE Putative uncharacterize	276990000	145570000	220440000	7654700	3297500	1732900	2624300	191720000	194450000	277730000	2	2	2	0.6	0.6	0.6	144.51	0.00097779	2.9408	643000000	7	2	1	1	2	1	1	2	1	1	4	2	1
45	A2A4N8;A2A4N7;K3W4P1;A1L329;P97432;F6S397;Q05BC8;A2A4N5;Q6ZQK3;Q91ZQ8	A2A4N8;A2A4N7;K3W4P1;A1L329;P97432;F6S397;Q05BC8;A2A4N5;Q6ZQK3;Q91ZQ8	Next to BRCA1 gene 1 protein	Nbr1	tr|A2A4N8|A2A4N8_MOUSE Next to BRCA1 gene 1 protein OS=Mus musculus GN=Nbr1 PE=4 SV=1;tr|A2A4N7|A2A4N7_MOUSE Next to BRCA1 gene 1 protein OS=Mus musculus GN=Nbr1 PE=4 SV=1;tr|K3W4P1|K3W4P1_MOUSE Next to BRCA1 gene 1 protein OS=Mus musculus GN=Nbr1 PE=4 SV=	230710000	203420000	431440000	24730000	6591700	5812000	12327000	335620000	260470000	370660000	8	8	8	17.2	17.2	17.2	106.07	0	32.691	865570000	17	5	4	7	5	4	7	5	4	7	6	4	7
46	A1L332;F6WYQ5;Q5DTG0;P70704-3;P70704-2;P70704;Q8CA15;Q52KQ7;Q3TRP7	A1L332;F6WYQ5;Q5DTG0;P70704-3;P70704-2;P70704;Q8CA15;Q52KQ7	Phospholipid-transporting ATPase;Phospholipid-transporting ATPase IA	Atp8a1	tr|A1L332|A1L332_MOUSE Atp8a1 protein OS=Mus musculus GN=Atp8a1 PE=2 SV=1;tr|F6WYQ5|F6WYQ5_MOUSE Phospholipid-transporting ATPase IA (Fragment) OS=Mus musculus GN=Atp8a1 PE=1 SV=1;tr|Q5DTG0|Q5DTG0_MOUSE ATPase, aminophospholipid transporter (APLT), class I	27717000	106490000	18200000	2344700	426420	1638300	280000	35503000	81848000	37831000	6	6	6	6.9	6.9	6.9	131.18	0	9.3448	152400000	7	1	4	3	1	4	3	1	4	3	1	4	2
47	A1L341;A9C475;Q61214;Q8K006;Q8C774;A9C478;A9C477;Q80ZK5;Q61158;Q5U4C9	A1L341;A9C475;Q61214;Q8K006	Dual specificity tyrosine-phosphorylation-regulated kinase 1A	Dyrk1a	tr|A1L341|A1L341_MOUSE Dual-specificity tyrosine-phosphorylation-regulated kinase 1A OS=Mus musculus GN=Dyrk1a PE=1 SV=1;tr|A9C475|A9C475_MOUSE Dual-specificity tyrosine-(Y)-phosphorylation regulated kinase 1a OS=Mus musculus GN=Dyrk1a PE=2 SV=1;sp|Q61214|	655020000	744350000	682390000	65055000	20469000	23261000	21325000	577930000	720690000	871390000	16	16	10	23.6	23.6	16.6	84.466	0	31.27	2081800000	36	12	12	8	12	12	8	7	8	4	15	12	9
48	B2CSK2;A1L347;P16627;Q9QWU1;Q91ZU4;Q91ZU5;Q9R2A1	B2CSK2;A1L347;P16627;Q9QWU1;Q91ZU4	Heat shock 70 kDa protein 1-like	Hspa1l;Hsc70t	tr|B2CSK2|B2CSK2_MOUSE Heat shock protein 1-like protein OS=Mus musculus PE=3 SV=1;tr|A1L347|A1L347_MOUSE Heat shock protein 1-like OS=Mus musculus GN=Hspa1l PE=2 SV=1;sp|P16627|HS71L_MOUSE Heat shock 70 kDa protein 1-like OS=Mus musculus GN=Hspa1l PE=2 SV	27175000	16642000	0	1095400	679380	416050	0	30238000	17671000	0	15	2	2	27.6	6.1	6.1	70.606	0.00070452	3.1294	43817000	2	12	12	13	2	1	0	2	1	0	1	1	0
49	A1L361;Q9WUN2;Q3THP3	A1L361;Q9WUN2;Q3THP3	Serine/threonine-protein kinase TBK1	Tbk1	tr|A1L361|A1L361_MOUSE TANK-binding kinase 1 OS=Mus musculus GN=Tbk1 PE=2 SV=1;sp|Q9WUN2|TBK1_MOUSE Serine/threonine-protein kinase TBK1 OS=Mus musculus GN=Tbk1 PE=1 SV=1;tr|Q3THP3|Q3THP3_MOUSE Putative uncharacterized protein OS=Mus musculus GN=Tbk1 PE=2	458000000	408950000	558450000	32396000	10409000	9294300	12692000	511070000	398190000	508940000	13	13	13	24.1	24.1	24.1	83.424	0	27.887	1425400000	23	7	10	8	7	10	8	7	10	8	7	9	7
50	A1L367;A1L366;Q61550;Q3UTE4;Q3TG35;Q6ZQJ6;R4GML2;A2AU37	A1L367;A1L366;Q61550;Q3UTE4;Q3TG35;Q6ZQJ6	Double-strand-break repair protein rad21 homolog	Rad21	tr|A1L367|A1L367_MOUSE RAD21 homolog (S. pombe) OS=Mus musculus GN=Rad21 PE=2 SV=1;tr|A1L366|A1L366_MOUSE RAD21 homolog (S. pombe) OS=Mus musculus GN=Rad21 PE=2 SV=1;sp|Q61550|RAD21_MOUSE Double-strand-break repair protein rad21 homolog OS=Mus musculus GN=	5587000000	5795300000	5228000000	638860000	214880000	222900000	201080000	6187100000	5635400000	5308300000	27	27	27	54.8	54.8	54.8	72.022	0	205.18	16610000000	126	22	25	24	22	25	24	22	25	24	41	41	44
51	A1L3B6;Q9D7Z3;Q9D7Z3-2	A1L3B6;Q9D7Z3;Q9D7Z3-2	Nucleolar protein 7	Nol7	tr|A1L3B6|A1L3B6_MOUSE Nol7 protein OS=Mus musculus GN=Nol7 PE=2 SV=1;sp|Q9D7Z3|NOL7_MOUSE Nucleolar protein 7 OS=Mus musculus GN=Nol7 PE=1 SV=1;sp|Q9D7Z3-2|NOL7_MOUSE Isoform 2 of Nucleolar protein 7 OS=Mus musculus GN=Nol7	203530000	624610000	262810000	136370000	25441000	78077000	32851000	200670000	723340000	177640000	4	4	4	18.9	18.9	18.9	28.97	0	26.689	1091000000	9	3	3	3	3	3	3	3	3	3	3	3	3
52	A1L3B8;P26516	A1L3B8;P26516	26S proteasome non-ATPase regulatory subunit 7	Psmd7	tr|A1L3B8|A1L3B8_MOUSE Proteasome (Prosome, macropain) 26S subunit, non-ATPase, 7 OS=Mus musculus GN=Psmd7 PE=2 SV=1;sp|P26516|PSMD7_MOUSE 26S proteasome non-ATPase regulatory subunit 7 OS=Mus musculus GN=Psmd7 PE=1 SV=2	5836900000	5330600000	4956600000	1074900000	389130000	355370000	330440000	5941400000	5553900000	4812600000	14	14	14	60.7	60.7	60.7	36.539	0	158.7	16124000000	77	12	14	13	12	14	13	12	14	13	31	23	23
53	Q80U52;A1L3P4;B0QZV3;Q8BTG0;D3Z0Q9	Q80U52;A1L3P4;B0QZV3;Q8BTG0	Sodium/hydrogen exchanger	Slc9a6	tr|Q80U52|Q80U52_MOUSE Sodium/hydrogen exchanger (Fragment) OS=Mus musculus GN=Slc9a6 PE=2 SV=1;tr|A1L3P4|A1L3P4_MOUSE Sodium/hydrogen exchanger OS=Mus musculus GN=Slc9a6 PE=1 SV=1;tr|B0QZV3|B0QZV3_MOUSE Sodium/hydrogen exchanger OS=Mus musculus GN=Slc9a6	56304000	51462000	87216000	8862800	2559300	2339200	3964400	59813000	64246000	64417000	3	3	3	7	7	7	77.75	0	7.3854	194980000	8	2	1	2	2	1	2	2	1	2	3	2	3
54	A1L3S5;A2ANX3	A1L3S5;A2ANX3	Phospholipid-transporting ATPase	Atp8b4	tr|A1L3S5|A1L3S5_MOUSE ATPase, class I, type 8B, member 4 OS=Mus musculus GN=Atp8b4 PE=2 SV=1;tr|A2ANX3|A2ANX3_MOUSE Protein Atp8b4 OS=Mus musculus GN=Atp8b4 PE=1 SV=1	213270000	0	193700000	21419000	11225000	0	10195000	196200000	0	211380000	2	2	2	4.5	4.5	4.5	61.916	0.0092581	1.5751	406970000	1	2	0	1	2	0	1	2	0	1	0	0	1
55	Q0VF70;Q3TWM5;A1Z2X7;A2APS1;Q9QY53	Q0VF70;Q3TWM5;A1Z2X7;A2APS1;Q9QY53	Nephrocystin-1	Nphp1	tr|Q0VF70|Q0VF70_MOUSE Nphp1 protein OS=Mus musculus GN=Nphp1 PE=2 SV=1;tr|Q3TWM5|Q3TWM5_MOUSE Nephrocystin-1 OS=Mus musculus GN=Nphp1 PE=2 SV=1;tr|A1Z2X7|A1Z2X7_MOUSE Nephrocystin 1 variant 1 OS=Mus musculus GN=Nphp1 PE=2 SV=3;tr|A2APS1|A2APS1_MOUSE Nephr	22035000	0	0	500810	500810	0	0	22035000	0	0	1	1	1	4.5	4.5	4.5	76.835	0	7.6205	22035000	1	1	0	0	1	0	0	1	0	0	1	0	0
56	A2A3U8;Q9D4H7	A2A3U8;Q9D4H7	LON peptidase N-terminal domain and RING finger protein 3	Lonrf3	tr|A2A3U8|A2A3U8_MOUSE LON peptidase N-terminal domain and RING finger protein 3 (Fragment) OS=Mus musculus GN=Lonrf3 PE=4 SV=1;sp|Q9D4H7|LONF3_MOUSE LON peptidase N-terminal domain and RING finger protein 3 OS=Mus musculus GN=Lonrf3 PE=2 SV=1	60724000	0	413440000	39514000	5060300	0	34453000	70277000	0	424420000	1	1	1	4.2	4.2	4.2	26.359	0.0030683	2.1332	474170000	2	1	0	1	1	0	1	1	0	1	1	0	1
57	A2A432;E9PXY1;A2A432-2;J3QJX0;Q3TP81	A2A432;E9PXY1;A2A432-2;J3QJX0	Cullin-4B	Cul4b	sp|A2A432|CUL4B_MOUSE Cullin-4B OS=Mus musculus GN=Cul4b PE=1 SV=1;tr|E9PXY1|E9PXY1_MOUSE Cullin-4B OS=Mus musculus GN=Cul4b PE=1 SV=2;sp|A2A432-2|CUL4B_MOUSE Isoform 2 of Cullin-4B OS=Mus musculus GN=Cul4b;tr|J3QJX0|J3QJX0_MOUSE Cullin-4B OS=Mus musculus	8423100000	7366000000	7222300000	359550000	131610000	115090000	112850000	8686300000	7144100000	8704000000	48	48	33	53.6	53.6	41.2	110.7	0	200.97	23011000000	169	40	37	38	40	37	38	26	24	26	61	51	57
58	A5D6Q2;B2RUJ1;A2A468;Q3UQL7;Q05BA5;O09000;Q3UV84	A5D6Q2;B2RUJ1;A2A468;Q3UQL7;Q05BA5;O09000	Nuclear receptor coactivator 3	Ncoa3	tr|A5D6Q2|A5D6Q2_MOUSE Ncoa3 protein (Fragment) OS=Mus musculus GN=Ncoa3 PE=2 SV=1;tr|B2RUJ1|B2RUJ1_MOUSE Ncoa3 protein OS=Mus musculus GN=Ncoa3 PE=2 SV=1;tr|A2A468|A2A468_MOUSE Nuclear receptor coactivator 3 OS=Mus musculus GN=Ncoa3 PE=1 SV=1;tr|Q3UQL7|Q3	148020000	207030000	93545000	7120500	2349500	3286200	1484800	150210000	230040000	118640000	10	10	10	11.7	11.7	11.7	146.4	0	21.066	448590000	15	6	6	4	6	6	4	6	6	4	8	5	2
59	A2A4A1;Q91ZF0	A2A4A1;Q91ZF0	DnaJ homolog subfamily C member 24	Dnajc24	tr|A2A4A1|A2A4A1_MOUSE DnaJ homolog subfamily C member 24 OS=Mus musculus GN=Dnajc24 PE=4 SV=1;sp|Q91ZF0|DJC24_MOUSE DnaJ homolog subfamily C member 24 OS=Mus musculus GN=Dnajc24 PE=1 SV=3	105990000	81489000	79689000	26717000	10599000	8148900	7968900	77579000	74892000	99109000	2	2	2	18.9	18.9	18.9	16.922	0.0015235	2.7725	267170000	3	1	2	1	1	2	1	1	2	1	1	1	1
60	A2A4A6;Q62077;Q2M4I9;Q3UZ68;G3UXP4;Q3TUJ5;F6SLL0;Q792T1;G3V016;Q9Z2S5	A2A4A6;Q62077;Q2M4I9;Q3UZ68	Phosphoinositide phospholipase C;1-phosphatidylinositol 4,5-bisphosphate phosphodiesterase gamma-1	Plcg1	tr|A2A4A6|A2A4A6_MOUSE Phosphoinositide phospholipase C OS=Mus musculus GN=Plcg1 PE=1 SV=1;sp|Q62077|PLCG1_MOUSE 1-phosphatidylinositol 4,5-bisphosphate phosphodiesterase gamma-1 OS=Mus musculus GN=Plcg1 PE=1 SV=2;tr|Q2M4I9|Q2M4I9_MOUSE Phosphoinositide ph	1811900000	1616800000	1245400000	66772000	25884000	23097000	17791000	1668800000	1739400000	1686200000	23	23	23	25.9	25.9	25.9	148.53	0	74.218	4674100000	65	17	18	18	17	18	18	17	18	18	24	20	21
61	A2A4B3;Q149B0;Q8CC87;A2A4B1;Q99PI4;Q571G1	A2A4B3;Q149B0;Q8CC87;A2A4B1;Q99PI4;Q571G1	Phosphatidate phosphatase LPIN3	Lpin3	tr|A2A4B3|A2A4B3_MOUSE Phosphatidate phosphatase LPIN3 OS=Mus musculus GN=Lpin3 PE=1 SV=1;tr|Q149B0|Q149B0_MOUSE Lipin 3 OS=Mus musculus GN=Lpin3 PE=2 SV=1;tr|Q8CC87|Q8CC87_MOUSE Putative uncharacterized protein OS=Mus musculus GN=Lpin3 PE=2 SV=1;tr|A2A4B1	23000000	7227400	14700000	1021100	522720	164260	334080	13163000	19012000	16122000	3	3	3	5.3	5.3	5.3	90.424	0.00098108	3.0189	44927000	4	2	1	2	2	1	2	2	1	2	1	1	2
62	Q3UQQ4;A2A4P0;Q5DTN5;A2A4N9;Q3TUC8;Q3U580;Q8R214	Q3UQQ4;A2A4P0;Q5DTN5;A2A4N9	ATP-dependent RNA helicase DHX8	Dhx8	tr|Q3UQQ4|Q3UQQ4_MOUSE Putative uncharacterized protein OS=Mus musculus GN=Dhx8 PE=2 SV=1;sp|A2A4P0|DHX8_MOUSE ATP-dependent RNA helicase DHX8 OS=Mus musculus GN=Dhx8 PE=2 SV=1;tr|Q5DTN5|Q5DTN5_MOUSE MKIAA4096 protein (Fragment) OS=Mus musculus GN=Dhx8 PE=	658950000	1211800000	791090000	39145000	9690500	17821000	11634000	1017300000	1032700000	818100000	25	23	23	28.6	27.3	27.3	142.55	0	70.632	2661900000	54	16	21	17	14	19	15	14	19	15	17	19	18
63	A2A4U6;Q8K379;Q8CGF0	A2A4U6;Q8K379;Q8CGF0		Zfp334	tr|A2A4U6|A2A4U6_MOUSE Protein Zfp334 OS=Mus musculus GN=Zfp334 PE=4 SV=1;tr|Q8K379|Q8K379_MOUSE Zfp334 protein (Fragment) OS=Mus musculus GN=Zfp334 PE=2 SV=1;tr|Q8CGF0|Q8CGF0_MOUSE Zinc finger protein 334 OS=Mus musculus GN=Zfp334 PE=2 SV=1	27334000	76422000	21850000	2462900	535970	1498500	428440	35178000	58157000	41077000	2	2	2	5.2	5.2	5.2	78.257	0	8.3722	125610000	4	1	2	1	1	2	1	1	2	1	1	2	1
64	A2A4Z0;Q9D1C1;Q3UWQ1;A2A4Z1	A2A4Z0;Q9D1C1;Q3UWQ1;A2A4Z1	Ubiquitin-conjugating enzyme E2 C	Ube2c	tr|A2A4Z0|A2A4Z0_MOUSE Ubiquitin-conjugating enzyme E2C OS=Mus musculus GN=Ube2c PE=2 SV=1;sp|Q9D1C1|UBE2C_MOUSE Ubiquitin-conjugating enzyme E2 C OS=Mus musculus GN=Ube2c PE=2 SV=1;tr|Q3UWQ1|Q3UWQ1_MOUSE Putative uncharacterized protein OS=Mus musculus GN	1692300000	1007700000	1347600000	311350000	130170000	77517000	103660000	1260600000	1551000000	1828900000	9	9	9	76	76	76	19.606	0	37.362	4047600000	29	7	5	6	7	5	6	7	5	6	11	8	10
65	A2A547;Q5I0T8;P84099	A2A547;Q5I0T8;P84099	Ribosomal protein L19;60S ribosomal protein L19	Rpl19	tr|A2A547|A2A547_MOUSE Ribosomal protein L19 OS=Mus musculus GN=Rpl19 PE=3 SV=1;tr|Q5I0T8|Q5I0T8_MOUSE Ribosomal protein L19 OS=Mus musculus GN=Rpl19 PE=2 SV=1;sp|P84099|RL19_MOUSE 60S ribosomal protein L19 OS=Mus musculus GN=Rpl19 PE=1 SV=1	7545300000	8213200000	7991100000	2638800000	838370000	912580000	887900000	6769500000	8031700000	8208500000	8	8	8	31.4	31.4	31.4	23.247	0	48.453	23750000000	74	7	7	6	7	7	6	7	7	6	19	23	32
66	A2A5H8;Q3USC7;Q8VE33	A2A5H8;Q3USC7;Q8VE33	Ganglioside-induced differentiation-associated protein 1-like 1	Gdap1l1	tr|A2A5H8|A2A5H8_MOUSE Ganglioside-induced differentiation-associated protein 1-like 1 (Fragment) OS=Mus musculus GN=Gdap1l1 PE=4 SV=2;tr|Q3USC7|Q3USC7_MOUSE Ganglioside-induced differentiation-associated protein 1-like 1 OS=Mus musculus GN=Gdap1l1 PE=2 SV	11434000	14022000	8859500	1906400	635230	778990	492200	13487000	13252000	10054000	1	1	1	4.9	4.9	4.9	30.433	0.00056948	3.357	34315000	3	1	1	1	1	1	1	1	1	1	1	1	1
67	A2A5K3;A2A5K4;Q3UE59;Q4FJT5;Q3UFS5;P55065	A2A5K3;A2A5K4;Q3UE59;Q4FJT5;Q3UFS5;P55065	Phospholipid transfer protein	Pltp	tr|A2A5K3|A2A5K3_MOUSE Phospholipid transfer protein (Fragment) OS=Mus musculus GN=Pltp PE=4 SV=1;tr|A2A5K4|A2A5K4_MOUSE Phospholipid transfer protein (Fragment) OS=Mus musculus GN=Pltp PE=4 SV=1;tr|Q3UE59|Q3UE59_MOUSE Putative uncharacterized protein (Fra	0	0	17957000	2565300	0	0	2565300	0	0	18529000	1	1	1	8.2	8.2	8.2	16.394	0.0088906	1.6022	17957000	1	0	0	1	0	0	1	0	0	1	0	0	1
68	A2A5N2;Q9CQV8;Q9CQV8-2;A2A5N1	A2A5N2;Q9CQV8;Q9CQV8-2;A2A5N1	14-3-3 protein beta/alpha;14-3-3 protein beta/alpha, N-terminally processed	Ywhab	tr|A2A5N2|A2A5N2_MOUSE Tyrosine 3-monooxygenase/tryptophan 5-monooxygenase activation protein, beta polypeptide OS=Mus musculus GN=Ywhab PE=2 SV=1;sp|Q9CQV8|1433B_MOUSE 14-3-3 protein beta/alpha OS=Mus musculus GN=Ywhab PE=1 SV=3;sp|Q9CQV8-2|1433B_MOUSE Is	11526000000	9833200000	10708000000	1886300000	677970000	578420000	629910000	11074000000	10062000000	11257000000	16	10	10	69.5	55.7	55.7	28.086	0	116.5	32067000000	39	15	15	13	9	9	7	9	9	7	15	11	13
69	B2RXY9;A2A5N3	B2RXY9;A2A5N3	Polyadenylate-binding protein	Pabpc1l	tr|B2RXY9|B2RXY9_MOUSE 1810053B01Rik protein OS=Mus musculus GN=Pabpc1l PE=2 SV=1;tr|A2A5N3|A2A5N3_MOUSE Embryonic poly(A)-binding protein OS=Mus musculus GN=Pabpc1l PE=2 SV=1	0	0	1326400	40195	0	0	40195	0	0	1882100	4	1	1	6.4	1.2	1.2	67.364	1	-2	1326400	1	3	3	4	0	0	1	0	0	1	0	0	1
70	A2A5R2;Q3U5C3;Q3U2F2;F6YCJ0	A2A5R2;Q3U5C3	Brefeldin A-inhibited guanine nucleotide-exchange protein 2	Arfgef2	sp|A2A5R2|BIG2_MOUSE Brefeldin A-inhibited guanine nucleotide-exchange protein 2 OS=Mus musculus GN=Arfgef2 PE=1 SV=1;tr|Q3U5C3|Q3U5C3_MOUSE Putative uncharacterized protein (Fragment) OS=Mus musculus GN=Arfgef2 PE=2 SV=1	3029400000	3037000000	2814900000	81480000	27792000	27863000	25824000	3164200000	3248900000	2935700000	45	45	34	33.4	33.4	26.6	202.24	0	179.65	8881300000	122	33	36	30	33	36	30	26	26	24	43	39	40
71	A2A5S3;Q3TWP5;Q3TU43;Q3UKX3;V9GX87;Q6TNG5	A2A5S3;Q3TWP5;Q3TU43;Q3UKX3;V9GX87;Q6TNG5		Stau1	tr|A2A5S3|A2A5S3_MOUSE Double-stranded RNA-binding protein Staufen homolog 1 OS=Mus musculus GN=Stau1 PE=4 SV=1;tr|Q3TWP5|Q3TWP5_MOUSE Putative uncharacterized protein (Fragment) OS=Mus musculus GN=Stau1 PE=2 SV=1;tr|Q3TU43|Q3TU43_MOUSE Putative uncharacte	1828600000	2822500000	1740800000	193690000	55412000	85529000	52750000	2159500000	2398500000	2248800000	24	24	1	51.9	51.9	3.2	54.855	0	104.04	6391800000	79	17	22	16	17	22	16	1	1	1	23	31	25
72	Q3UQ95;A2A5W4;Q6P0X6;B7ZC40;Q923X4-2;Q923X4	Q3UQ95;A2A5W4;Q6P0X6;B7ZC40;Q923X4-2;Q923X4	Glutaredoxin-2, mitochondrial	Glrx2	tr|Q3UQ95|Q3UQ95_MOUSE Putative uncharacterized protein OS=Mus musculus GN=Glrx2 PE=2 SV=1;tr|A2A5W4|A2A5W4_MOUSE Glutaredoxin 2 (Thioltransferase) OS=Mus musculus GN=Glrx2 PE=2 SV=1;tr|Q6P0X6|Q6P0X6_MOUSE Glrx2 protein (Fragment) OS=Mus musculus GN=Glrx2	0	74156000	67410000	17696000	0	9269500	8426300	0	76028000	68166000	1	1	1	15.4	15.4	15.4	14.042	0.00015193	4.7918	141570000	3	0	1	1	0	1	1	0	1	1	0	1	2
73	A2A5Y4;Q80TG1-4;Q80TG1-3;Q80TG1-2;Q80TG1	A2A5Y4;Q80TG1-4;Q80TG1-3;Q80TG1-2;Q80TG1	KAT8 regulatory NSL complex subunit 1	Kansl1	tr|A2A5Y4|A2A5Y4_MOUSE KAT8 regulatory NSL complex subunit 1 OS=Mus musculus GN=Kansl1 PE=4 SV=1;sp|Q80TG1-4|KANL1_MOUSE Isoform 4 of KAT8 regulatory NSL complex subunit 1 OS=Mus musculus GN=Kansl1;sp|Q80TG1-3|KANL1_MOUSE Isoform 3 of KAT8 regulatory NSL c	12840000	12910000	0	429160	214000	215160	0	11573000	0	0	2	2	2	3.3	3.3	3.3	120.4	0.00015946	6.132	25749000	2	1	1	0	1	1	0	1	1	0	1	1	0
74	E9Q6A7;A2A655;A2A654;E5D6T0;Q3UPA6;Q6P9L3;Q8K092;Q8CFX5;A2A653;Q8VDN7;Q3TMJ3;A2A652;Q8C473	E9Q6A7;A2A655;A2A654;E5D6T0		Bptf	tr|E9Q6A7|E9Q6A7_MOUSE Protein Bptf OS=Mus musculus GN=Bptf PE=4 SV=1;tr|A2A655|A2A655_MOUSE Protein Bptf OS=Mus musculus GN=Bptf PE=4 SV=1;tr|A2A654|A2A654_MOUSE Protein Bptf OS=Mus musculus GN=Bptf PE=4 SV=1;tr|E5D6T0|E5D6T0_MOUSE Bromodomain PHD finger	777320000	915100000	608370000	14749000	4982800	5866000	3899800	788960000	824440000	770600000	30	30	30	16.3	16.3	16.3	321.59	0	73.644	2300800000	57	19	19	19	19	19	19	19	19	19	17	20	20
75	A2A690;A2A690-2;F6VP19;F6VCI2	A2A690;A2A690-2;F6VP19	Protein TANC2	Tanc2	sp|A2A690|TANC2_MOUSE Protein TANC2 OS=Mus musculus GN=Tanc2 PE=1 SV=1;sp|A2A690-2|TANC2_MOUSE Isoform 2 of Protein TANC2 OS=Mus musculus GN=Tanc2;tr|F6VP19|F6VP19_MOUSE Protein TANC2 (Fragment) OS=Mus musculus GN=Tanc2 PE=1 SV=1	37068000	45536000	0	737540	330970	406570	0	46492000	43101000	0	6	5	5	3.8	3.5	3.5	220.26	0.00014899	4.3402	82604000	4	4	3	0	4	2	0	4	2	0	3	1	0
76	D6RE23;D6RDT5;B0QZI6;B0QZI7;B0QZI5;B0QZI4;B0QZI3;A2A697;Q14BQ5;Q9D8K8	D6RE23;D6RDT5;B0QZI6;B0QZI7;B0QZI5;B0QZI4;B0QZI3;A2A697;Q14BQ5;Q9D8K8	Solute carrier family 25 member 39	Slc25a39	tr|D6RE23|D6RE23_MOUSE Solute carrier family 25 member 39 OS=Mus musculus GN=Slc25a39 PE=4 SV=1;tr|D6RDT5|D6RDT5_MOUSE Solute carrier family 25 member 39 OS=Mus musculus GN=Slc25a39 PE=4 SV=1;tr|B0QZI6|B0QZI6_MOUSE Solute carrier family 25 member 39 (Fragm	21310000	0	0	3044300	3044300	0	0	25137000	0	0	1	1	1	13.3	13.3	13.3	14.223	0.00028827	3.5929	21310000	1	1	0	0	1	0	0	1	0	0	1	0	0
77	A2A6A1;A0PJ58	A2A6A1;A0PJ58	G patch domain-containing protein 8	Gpatch8	sp|A2A6A1|GPTC8_MOUSE G patch domain-containing protein 8 OS=Mus musculus GN=Gpatch8 PE=1 SV=1;tr|A0PJ58|A0PJ58_MOUSE Gpatch8 protein (Fragment) OS=Mus musculus GN=Gpatch8 PE=2 SV=1	321320000	367340000	284480000	13516000	4462700	5101900	3951100	396930000	344080000	328140000	10	10	10	8.8	8.8	8.8	164.99	0	24.212	973130000	21	5	8	6	5	8	6	5	8	6	6	9	6
78	Q9CW60;Q3V3M1;Q3UFI8;Q6GTN8;Q3U5L0;Q3U4L3;A2A6D2;Q9Z2E8;Q6KAM4;Q61985-2;Q61985-3;Q61985	Q9CW60;Q3V3M1;Q3UFI8;Q6GTN8;Q3U5L0;Q3U4L3;A2A6D2;Q9Z2E8;Q6KAM4;Q61985-2;Q61985-3;Q61985	Nuclear factor erythroid 2-related factor 1	Nfe2l1	tr|Q9CW60|Q9CW60_MOUSE Putative uncharacterized protein (Fragment) OS=Mus musculus GN=Nfe2l1 PE=2 SV=1;tr|Q3V3M1|Q3V3M1_MOUSE Nuclear factor erythroid 2-related factor 1 OS=Mus musculus GN=Nfe2l1 PE=2 SV=1;tr|Q3UFI8|Q3UFI8_MOUSE Putative uncharacterized pr	0	0	33546000	3354600	0	0	3354600	0	0	43028000	1	1	1	4.5	4.5	4.5	37.222	0.0082602	1.6266	33546000	1	0	0	1	0	0	1	0	0	1	0	0	1
79	A2A6K0;A2A6J8;P13412	A2A6K0;A2A6J8;P13412	Troponin I, fast skeletal muscle	Tnni2	tr|A2A6K0|A2A6K0_MOUSE Troponin I, fast skeletal muscle (Fragment) OS=Mus musculus GN=Tnni2 PE=4 SV=1;tr|A2A6J8|A2A6J8_MOUSE Troponin I, fast skeletal muscle (Fragment) OS=Mus musculus GN=Tnni2 PE=4 SV=1;sp|P13412|TNNI2_MOUSE Troponin I, fast skeletal musc	206770000	0	171430000	47276000	25847000	0	21429000	204240000	0	186320000	1	1	1	10.4	10.4	10.4	15.735	0.0097199	1.5036	378200000	4	1	0	1	1	0	1	1	0	1	2	0	2
80	A2A6M1;Q9CZ28	A2A6M1;Q9CZ28	Vacuolar-sorting protein SNF8	Snf8	tr|A2A6M1|A2A6M1_MOUSE Vacuolar-sorting protein SNF8 OS=Mus musculus GN=Snf8 PE=4 SV=1;sp|Q9CZ28|SNF8_MOUSE Vacuolar-sorting protein SNF8 OS=Mus musculus GN=Snf8 PE=2 SV=1	405290000	73670000	283870000	95353000	50661000	9208800	35483000	239310000	307360000	239190000	3	3	3	21	21	21	25.968	0	10.786	762820000	6	3	2	3	3	2	3	3	2	3	3	1	2
81	A2A6P4;Q8BKU4;Q9CQP1;Q3TYF6;Q3TY58	A2A6P4;Q8BKU4;Q9CQP1;Q3TYF6;Q3TY58		Fam104a	tr|A2A6P4|A2A6P4_MOUSE Protein Fam104a OS=Mus musculus GN=Fam104a PE=4 SV=1;tr|Q8BKU4|Q8BKU4_MOUSE Putative uncharacterized protein (Fragment) OS=Mus musculus GN=Fam104a PE=2 SV=1;tr|Q9CQP1|Q9CQP1_MOUSE DNA segment, Chr 11, Wayne State University 99, expre	44696000	141020000	81669000	44565000	7449400	23504000	13611000	115400000	122280000	53293000	2	2	2	35.7	35.7	35.7	19.618	0	7.1404	267390000	4	1	2	2	1	2	2	1	2	2	1	2	1
82	A2A6Q5;A2A6Q5-3;A2A6Q5-2;Q3TTW1;Q3UYS3;Q8BYJ1;Q8R568	A2A6Q5;A2A6Q5-3;A2A6Q5-2	Cell division cycle protein 27 homolog	Cdc27	sp|A2A6Q5|CDC27_MOUSE Cell division cycle protein 27 homolog OS=Mus musculus GN=Cdc27 PE=1 SV=1;sp|A2A6Q5-3|CDC27_MOUSE Isoform 3 of Cell division cycle protein 27 homolog OS=Mus musculus GN=Cdc27;sp|A2A6Q5-2|CDC27_MOUSE Isoform 2 of Cell division cycle pr	876750000	986950000	454850000	56550000	21384000	24072000	11094000	828770000	852150000	650580000	19	19	19	35.3	35.3	35.3	91.841	0	46.585	2318600000	38	13	12	8	13	12	8	13	12	8	13	16	9
83	B2RWR4;B7ZMV4;A2A6T1	B2RWR4;B7ZMV4;A2A6T1	Cerebellar degeneration-related protein 2-like	Cdr2l	tr|B2RWR4|B2RWR4_MOUSE Cerebellar degeneration-related protein 2-like OS=Mus musculus GN=Cdr2l PE=2 SV=1;tr|B7ZMV4|B7ZMV4_MOUSE Cdr2l protein OS=Mus musculus GN=Cdr2l PE=2 SV=1;sp|A2A6T1|CDR2L_MOUSE Cerebellar degeneration-related protein 2-like OS=Mus mus	584890000	297300000	356300000	39951000	18867000	9590400	11493000	483470000	359050000	387810000	8	8	8	21.9	21.9	21.9	53.238	0	40.723	1238500000	16	5	4	6	5	4	6	5	4	6	7	3	6
84	Q3TAX1;A2A716;F8VQM4;Q5U471	Q3TAX1;A2A716;F8VQM4	Oxysterol-binding protein	Osbpl7	tr|Q3TAX1|Q3TAX1_MOUSE Oxysterol-binding protein (Fragment) OS=Mus musculus GN=Osbpl7 PE=2 SV=1;tr|A2A716|A2A716_MOUSE Oxysterol-binding protein OS=Mus musculus GN=Osbpl7 PE=3 SV=1;tr|F8VQM4|F8VQM4_MOUSE Oxysterol-binding protein OS=Mus musculus GN=Osbpl7	82665000	69474000	39929000	4268200	1837000	1543900	887320	83392000	74056000	59515000	6	5	5	14	12.3	12.3	87.042	0	14.333	192070000	10	5	4	2	4	4	2	4	4	2	4	4	2
85	A2A791;A2A791-2;F6VYE2	A2A791;A2A791-2;F6VYE2	Zinc finger MYM-type protein 4	Zmym4	sp|A2A791|ZMYM4_MOUSE Zinc finger MYM-type protein 4 OS=Mus musculus GN=Zmym4 PE=2 SV=1;sp|A2A791-2|ZMYM4_MOUSE Isoform 2 of Zinc finger MYM-type protein 4 OS=Mus musculus GN=Zmym4;tr|F6VYE2|F6VYE2_MOUSE Zinc finger MYM-type protein 4 (Fragment) OS=Mus mus	918500000	847750000	972450000	32996000	11066000	10214000	11716000	875900000	991210000	1037300000	27	27	27	28.9	28.9	28.9	172.44	0	76.838	2738700000	65	20	17	17	20	17	17	20	17	17	22	21	22
86	A2A7A7;Q8CFX1;A2A7A8;Q8QZU3;Q3TFM8;Q8BMC8	A2A7A7;Q8CFX1	GDH/6PGL endoplasmic bifunctional protein;Glucose 1-dehydrogenase;6-phosphogluconolactonase	H6pd	tr|A2A7A7|A2A7A7_MOUSE GDH/6PGL endoplasmic bifunctional protein OS=Mus musculus GN=H6pd PE=1 SV=1;sp|Q8CFX1|G6PE_MOUSE GDH/6PGL endoplasmic bifunctional protein OS=Mus musculus GN=H6pd PE=1 SV=2	511900000	1385200000	410520000	54945000	12188000	32982000	9774400	665850000	735160000	995020000	14	14	14	25	25	25	89.909	0	29.708	2307700000	24	9	9	7	9	9	7	9	9	7	9	9	6
87	B9EKQ3;A2A7B5;Q80VF3	B9EKQ3;A2A7B5		Prdm2	tr|B9EKQ3|B9EKQ3_MOUSE Prdm2 protein OS=Mus musculus GN=Prdm2 PE=2 SV=1;tr|A2A7B5|A2A7B5_MOUSE Protein Prdm2 OS=Mus musculus GN=Prdm2 PE=1 SV=1	21481000	73618000	81538000	2030300	246910	846180	937220	51118000	91588000	64476000	3	3	3	2.6	2.6	2.6	182.93	0.00015931	6.1089	176640000	7	1	3	2	1	3	2	1	3	2	1	3	3
88	E9Q532;A2A7F4;Q3TR19;Q3V1H6;Q3TAD2;Q922U7;A2A7F3	E9Q532;A2A7F4;Q3TR19;Q3V1H6		Rlf	tr|E9Q532|E9Q532_MOUSE Insulin-like 3 OS=Mus musculus GN=Rlf PE=4 SV=1;tr|A2A7F4|A2A7F4_MOUSE Insulin-like 3 OS=Mus musculus GN=Rlf PE=4 SV=1;tr|Q3TR19|Q3TR19_MOUSE Putative uncharacterized protein (Fragment) OS=Mus musculus GN=Rlf PE=2 SV=1;tr|Q3V1H6|Q3V1	87966000	184940000	144150000	4686000	988380	2078000	1619600	174970000	147160000	133160000	8	8	8	6.6	6.6	6.6	206.28	0	11.163	417050000	18	3	7	5	3	7	5	3	7	5	3	9	6
89	Q3V399;F7BGN3;Q497H7;F6Z4F8;Q3UDB2;A2A7F7;Q9WU20	Q3V399;F7BGN3;Q497H7;F6Z4F8;Q3UDB2;A2A7F7;Q9WU20	Methylenetetrahydrofolate reductase	Mthfr	tr|Q3V399|Q3V399_MOUSE Putative uncharacterized protein (Fragment) OS=Mus musculus GN=Mthfr PE=2 SV=1;tr|F7BGN3|F7BGN3_MOUSE Methylenetetrahydrofolate reductase (Fragment) OS=Mus musculus GN=Mthfr PE=4 SV=1;tr|Q497H7|Q497H7_MOUSE Mthfr protein (Fragment) O	18849000	23079000	40041000	10246000	2356200	2884800	5005100	42614000	16114000	34051000	2	2	2	18.4	18.4	18.4	17.92	0.00016082	6.3543	81969000	4	1	2	2	1	2	2	1	2	2	1	1	2
90	D6RHP0;G3UY69;E9PUJ0;A2A7H6;A2A7H4;G3UZT3;A2A7H5;G3UYF5;Q8BK26-2;Q8BK26	D6RHP0;G3UY69;E9PUJ0;A2A7H6;A2A7H4;G3UZT3;A2A7H5;G3UYF5;Q8BK26-2;Q8BK26	F-box only protein 44	Fbxo44	tr|D6RHP0|D6RHP0_MOUSE F-box only protein 44 OS=Mus musculus GN=Fbxo44 PE=4 SV=2;tr|G3UY69|G3UY69_MOUSE F-box only protein 44 OS=Mus musculus GN=Fbxo44 PE=4 SV=1;tr|E9PUJ0|E9PUJ0_MOUSE F-box only protein 44 OS=Mus musculus GN=Fbxo44 PE=4 SV=1;tr|A2A7H6|A2A	51565000	29414000	43978000	17851000	7366500	4202000	6282500	56871000	43704000	48875000	1	1	1	8.5	8.5	8.5	13.626	0.004357	1.9531	124960000	5	1	1	1	1	1	1	1	1	1	2	1	2
91	A2A7P9;Q99LQ4	A2A7P9;Q99LQ4	Coiled-coil domain-containing protein 23	Ccdc23	tr|A2A7P9|A2A7P9_MOUSE Coiled-coil domain containing 23, isoform CRA_c OS=Mus musculus GN=Ccdc23 PE=4 SV=1;sp|Q99LQ4|CCD23_MOUSE Coiled-coil domain-containing protein 23 OS=Mus musculus GN=Ccdc23 PE=2 SV=1	0	0	6661600	832700	0	0	832700	0	0	6873800	1	1	1	14.7	14.7	14.7	12.02	0.0030749	2.1661	6661600	1	0	0	1	0	0	1	0	0	1	0	0	1
92	A6PW84;A2A7Q5;Q3V1T4;Q3V1T4-3;Q3V1T4-2;F2Z499	A6PW84;A2A7Q5;Q3V1T4;Q3V1T4-3;Q3V1T4-2	Prolyl 3-hydroxylase 1	P3h1;Lepre1	tr|A6PW84|A6PW84_MOUSE Prolyl 3-hydroxylase 1 OS=Mus musculus GN=Lepre1 PE=4 SV=1;tr|A2A7Q5|A2A7Q5_MOUSE Prolyl 3-hydroxylase 1 OS=Mus musculus GN=Lepre1 PE=4 SV=1;sp|Q3V1T4|P3H1_MOUSE Prolyl 3-hydroxylase 1 OS=Mus musculus GN=Lepre1 PE=2 SV=2;sp|Q3V1T4-3|	455870000	396350000	355850000	31791000	11997000	10430000	9364400	432480000	293540000	484010000	11	11	11	22.8	22.8	22.8	84.472	0	69.704	1208100000	27	8	8	8	8	8	8	8	8	8	9	10	8
93	A2A7S7;F6VXZ2	A2A7S7	Tyrosine--tRNA ligase	Yars	tr|A2A7S7|A2A7S7_MOUSE Tyrosine--tRNA ligase, cytoplasmic OS=Mus musculus GN=Yars PE=4 SV=1	18382000000	18732000000	15216000000	1113400000	391110000	398540000	323740000	19063000000	17159000000	16662000000	50	50	2	81.6	81.6	5	63.001	0	204	52330000000	226	44	45	41	44	45	41	1	1	1	80	74	72
94	A2A7T8;Q3TJB1;Q9D294;Q6P214;Q05CB3;Q6PG63;Q3V1K4;Q8BQI6;Q9D102;A2A7U0	A2A7T8;Q3TJB1;Q9D294;Q6P214;Q05CB3;Q6PG63;Q3V1K4;Q8BQI6		Zmym1	tr|A2A7T8|A2A7T8_MOUSE Protein Zmym1 OS=Mus musculus GN=Zmym1 PE=4 SV=1;tr|Q3TJB1|Q3TJB1_MOUSE Protein Zmym1 OS=Mus musculus GN=Zmym1 PE=2 SV=1;tr|Q9D294|Q9D294_MOUSE Putative uncharacterized protein OS=Mus musculus GN=Zmym1 PE=2 SV=1;tr|Q6P214|Q6P214_MOUS	62525000	138150000	26814000	4374900	1202400	2656800	515660	91351000	128520000	28867000	7	7	7	10.3	10.3	10.3	100.03	0	9.0403	227490000	10	3	6	2	3	6	2	3	6	2	3	6	1
95	A2A7Z4;Q78IG7;Q9CQH7	A2A7Z4;Q78IG7;Q9CQH7	Transcription factor BTF3;Transcription factor BTF3 homolog 4	Btf3l4	tr|A2A7Z4|A2A7Z4_MOUSE Basic transcription factor 3-like 4 OS=Mus musculus GN=Btf3l4 PE=2 SV=1;tr|Q78IG7|Q78IG7_MOUSE Btf3l4 protein (Fragment) OS=Mus musculus GN=Btf3l4 PE=2 SV=1;sp|Q9CQH7|BT3L4_MOUSE Transcription factor BTF3 homolog 4 OS=Mus musculus GN	2181800000	2023700000	1772300000	597780000	218180000	202370000	177230000	1855900000	2126400000	2072300000	10	10	10	68.4	68.4	68.4	17.27	0	91.048	5977800000	51	9	8	8	9	8	8	9	8	8	17	18	16
96	A2A841;P48193-2;P48193;A2A842;B6ZHC8;A0A068WAZ7;A2A839;A2A838;A0A068WAQ5;A2AD32;Q3UH12;F7BUB8;Q3V048;F6S4K9;B6ZHC3;B6ZHC2;Q3U0G7;F7CR30	A2A841;P48193-2;P48193;A2A842;B6ZHC8;A0A068WAZ7;A2A839;A2A838;A0A068WAQ5;A2AD32;Q3UH12	Protein 4.1	Epb4.1;Epb41	tr|A2A841|A2A841_MOUSE Protein 4.1 OS=Mus musculus GN=Epb4.1 PE=1 SV=1;sp|P48193-2|41_MOUSE Isoform 2 of Protein 4.1 OS=Mus musculus GN=Epb41;sp|P48193|41_MOUSE Protein 4.1 OS=Mus musculus GN=Epb41 PE=1 SV=2;tr|A2A842|A2A842_MOUSE Protein 4.1 OS=Mus muscul	1268800000	661380000	999490000	53266000	23068000	12025000	18173000	1100100000	861380000	1061100000	21	19	19	27.4	24.5	24.5	97.239	0	78.284	2929600000	49	17	14	18	16	12	16	16	12	16	18	11	20
97	A2A8E2;Q8BHG2;Q8BHG2-3;B7ZC72;B7ZC71;Q8BHG2-2;D6REH4	A2A8E2;Q8BHG2;Q8BHG2-3;B7ZC72;B7ZC71;Q8BHG2-2	UPF0587 protein C1orf123 homolog	0610037L13Rik	tr|A2A8E2|A2A8E2_MOUSE Protein 0610037L13Rik OS=Mus musculus GN=0610037L13Rik PE=4 SV=1;sp|Q8BHG2|CA123_MOUSE UPF0587 protein C1orf123 homolog OS=Mus musculus PE=2 SV=1;sp|Q8BHG2-3|CA123_MOUSE Isoform 3 of UPF0587 protein C1orf123 homolog OS=Mus musculus;t	705550000	747960000	616400000	188170000	64141000	67996000	56036000	612020000	888720000	749400000	4	4	3	38.4	38.4	26.1	15.783	0	11.233	2069900000	17	3	4	3	3	4	3	3	3	2	6	6	5
98	A2A8L5;F6Y3V0;F6S1X8;Q4U1Z0;Q3TT24;Q3V0J9;Q64696;Q3V315	A2A8L5;F6Y3V0;F6S1X8;Q4U1Z0	Receptor-type tyrosine-protein phosphatase F	Ptprf	sp|A2A8L5|PTPRF_MOUSE Receptor-type tyrosine-protein phosphatase F OS=Mus musculus GN=Ptprf PE=1 SV=1;tr|F6Y3V0|F6Y3V0_MOUSE Receptor-type tyrosine-protein phosphatase F (Fragment) OS=Mus musculus GN=Ptprf PE=4 SV=1;tr|F6S1X8|F6S1X8_MOUSE Receptor-type tyr	87375000	123000000	74944000	2570500	787160	1108100	675170	87513000	108690000	129130000	10	10	8	8	8	6.5	211.49	0	20.845	285320000	15	4	7	4	4	7	4	4	5	4	4	8	3
99	A2A8L9;Q8BW72-2;Q8BW72	A2A8L9;Q8BW72-2;Q8BW72	Lysine-specific demethylase 4A	Kdm4a	tr|A2A8L9|A2A8L9_MOUSE Lysine-specific demethylase 4A OS=Mus musculus GN=Kdm4a PE=4 SV=1;sp|Q8BW72-2|KDM4A_MOUSE Isoform 2 of Lysine-specific demethylase 4A OS=Mus musculus GN=Kdm4a;sp|Q8BW72|KDM4A_MOUSE Lysine-specific demethylase 4A OS=Mus musculus GN=Kd	0	111520000	110980000	4837200	0	2424400	2412700	0	146510000	105420000	5	5	5	7.7	7.7	7.7	115.97	0	9.2546	222510000	4	0	4	3	0	4	3	0	4	3	0	2	2
100	E9Q2S4;A2A8M8	E9Q2S4;A2A8M8		Pramef6	tr|E9Q2S4|E9Q2S4_MOUSE Protein Pramef6 OS=Mus musculus GN=Pramef6 PE=4 SV=1;tr|A2A8M8|A2A8M8_MOUSE Protein Pramef6 OS=Mus musculus GN=Pramef6 PE=4 SV=1	137120000	259570000	215870000	20419000	4570500	8652400	7195800	137120000	296030000	232120000	1	1	1	3.2	3.2	3.2	53.659	1	-2	612560000	2	1	1	1	1	1	1	1	1	1	1	0	1
101	A8Y5G5;A2A8R0;A0S860;Q80XL0	A8Y5G5;A2A8R0		Zfyve9	tr|A8Y5G5|A8Y5G5_MOUSE Protein Zfyve9 OS=Mus musculus GN=Zfyve9 PE=4 SV=1;tr|A2A8R0|A2A8R0_MOUSE MCG17975 OS=Mus musculus GN=Zfyve9 PE=4 SV=1	100460000	48524000	149170000	4732600	1594600	770230	2367800	149740000	78518000	108100000	6	6	6	10.1	10.1	10.1	146.33	0	7.1059	298150000	9	4	1	4	4	1	4	4	1	4	4	1	4
102	A2A8R7;B2RX14;Q8BIZ5;Q3V3D5;Q9EQN6	A2A8R7;B2RX14	Terminal uridylyltransferase 4	Zcchc11	tr|A2A8R7|A2A8R7_MOUSE Terminal uridylyltransferase 4 OS=Mus musculus GN=Zcchc11 PE=1 SV=1;sp|B2RX14|TUT4_MOUSE Terminal uridylyltransferase 4 OS=Mus musculus GN=Zcchc11 PE=1 SV=2	303340000	481850000	699770000	14417000	2945000	4678200	6793900	470530000	482490000	533190000	19	17	17	17.7	16.6	16.6	185.12	0	34.854	1485000000	33	11	16	10	9	15	9	9	15	9	8	14	11
103	A2A8U2-3;A2A8U2;Q3TXY3;A2A8U2-2;Q8C397;Q8C9U2	A2A8U2-3;A2A8U2;Q3TXY3;A2A8U2-2;Q8C397	Transmembrane protein 201	Tmem201	sp|A2A8U2-3|TM201_MOUSE Isoform 3 of Transmembrane protein 201 OS=Mus musculus GN=Tmem201;sp|A2A8U2|TM201_MOUSE Transmembrane protein 201 OS=Mus musculus GN=Tmem201 PE=2 SV=1;tr|Q3TXY3|Q3TXY3_MOUSE Putative uncharacterized protein OS=Mus musculus GN=Tmem20	381580000	360390000	380840000	53467000	18170000	17161000	18135000	465030000	415720000	365300000	6	6	6	17.8	17.8	17.8	69.25	0	19.161	1122800000	18	3	6	5	3	6	5	3	6	5	5	7	6
104	A2A8V9;E9PUK6;Q52KI8;E9QKA4;A2A8V8;Q52KI8-2;A2A983;F7BWM1;F6T4M4;F6UK16	A2A8V9;E9PUK6;Q52KI8;E9QKA4;A2A8V8;Q52KI8-2	Serine/arginine repetitive matrix protein 1	Srrm1	tr|A2A8V9|A2A8V9_MOUSE Serine/arginine repetitive matrix protein 1 OS=Mus musculus GN=Srrm1 PE=1 SV=1;tr|E9PUK6|E9PUK6_MOUSE Serine/arginine repetitive matrix protein 1 OS=Mus musculus GN=Srrm1 PE=1 SV=1;sp|Q52KI8|SRRM1_MOUSE Serine/arginine repetitive mat	2694300000	3728100000	3229800000	185620000	51813000	71695000	62111000	3613400000	2917500000	2803300000	12	12	12	16.2	16.2	16.2	103.71	0	49.543	9652200000	44	6	10	11	6	10	11	6	10	11	11	15	18
105	F6UHR6;E9PXZ2;A2A8Z1;E9Q6C1;Q5FWX7;Z4YJX3;A2A8Z1-2;Q8VDM5;Q8R0G3;Q99LZ2;F8VQE8	F6UHR6;E9PXZ2;A2A8Z1;E9Q6C1;Q5FWX7;Z4YJX3;A2A8Z1-2;Q8VDM5;Q8R0G3	Oxysterol-binding protein;Oxysterol-binding protein-related protein 9	Osbpl9	tr|F6UHR6|F6UHR6_MOUSE Oxysterol-binding protein OS=Mus musculus GN=Osbpl9 PE=1 SV=2;tr|E9PXZ2|E9PXZ2_MOUSE Oxysterol-binding protein OS=Mus musculus GN=Osbpl9 PE=1 SV=2;sp|A2A8Z1|OSBL9_MOUSE Oxysterol-binding protein-related protein 9 OS=Mus musculus GN=O	538130000	1095300000	849390000	82762000	17938000	36511000	28313000	713830000	1156800000	781710000	16	16	16	27.3	27.3	27.3	81.09	0	66.733	2482900000	40	10	12	13	10	12	13	10	12	13	13	11	16
106	A2A934;A2A930;A2A931;A2A933;A2A935-2;A2A935;A2A935-3;G3UYY9;A4QPC8;G3UZ13;Q8CCA6;G3UWJ0;O35700;G3UWT0;H9T841;G3UZT5;P14404;Q8BQB3;Q3U835;Q9CS56;Q8C763;Q8BNF5;G3UYK2	A2A934;A2A930;A2A931;A2A933;A2A935-2;A2A935;A2A935-3;G3UYY9;A4QPC8;G3UZ13;Q8CCA6;G3UWJ0;O35700;G3UWT0;H9T841;G3UZT5;P14404	PR domain zinc finger protein 16;MDS1 and EVI1 complex locus protein EVI1	Prdm16;Mecom	tr|A2A934|A2A934_MOUSE PR domain zinc finger protein 16 OS=Mus musculus GN=Prdm16 PE=4 SV=1;tr|A2A930|A2A930_MOUSE PR domain zinc finger protein 16 OS=Mus musculus GN=Prdm16 PE=4 SV=1;tr|A2A931|A2A931_MOUSE PR domain zinc finger protein 16 OS=Mus musculus	12360000000	11722000000	20888000000	788950000	216850000	205660000	366450000	16926000000	11735000000	21257000000	3	3	3	2.4	2.4	2.4	130.34	0.00028873	3.6182	44970000000	10	3	3	2	3	3	2	3	3	2	5	2	3
107	A8Y5H7;Q99J07;Q9DBQ0;A2A9B9;Q6A071;Q8BXE6	A8Y5H7;Q99J07;Q9DBQ0;A2A9B9;Q6A071;Q8BXE6		Sec14l1	tr|A8Y5H7|A8Y5H7_MOUSE Protein Sec14l1 OS=Mus musculus GN=Sec14l1 PE=4 SV=1;tr|Q99J07|Q99J07_MOUSE Protein Sec14l1 OS=Mus musculus GN=Sec14l1 PE=2 SV=1;tr|Q9DBQ0|Q9DBQ0_MOUSE Putative uncharacterized protein OS=Mus musculus GN=Sec14l1 PE=2 SV=1;tr|A2A9B9|A	17252000	17067000	59049000	2122000	392100	387900	1342000	53262000	0	31579000	4	4	4	7.3	7.3	7.3	81.215	0.0026871	2.2549	93369000	4	1	1	3	1	1	3	1	1	3	1	1	2
108	A2A9C3-2;A2A9C3;Q6ZQA5;V9GXW1	A2A9C3-2;A2A9C3;Q6ZQA5	Protein SZT2	Szt2;mKIAA0467	sp|A2A9C3-2|SZT2_MOUSE Isoform 2 of Protein SZT2 OS=Mus musculus GN=Szt2;sp|A2A9C3|SZT2_MOUSE Protein SZT2 OS=Mus musculus GN=Szt2 PE=1 SV=1;tr|Q6ZQA5|Q6ZQA5_MOUSE MKIAA0467 protein (Fragment) OS=Mus musculus GN=mKIAA0467 PE=4 SV=2	0	50665000	17516000	410730	0	305210	105520	0	46333000	0	5	5	5	2.3	2.3	2.3	377.52	0.00056681	3.2628	68181000	4	0	4	1	0	4	1	0	4	1	0	3	1
109	A2A9I0;O35166	A2A9I0;O35166	Golgi SNAP receptor complex member 2	Gosr2	tr|A2A9I0|A2A9I0_MOUSE Golgi SNAP receptor complex member 2 OS=Mus musculus GN=Gosr2 PE=4 SV=1;sp|O35166|GOSR2_MOUSE Golgi SNAP receptor complex member 2 OS=Mus musculus GN=Gosr2 PE=2 SV=2	245240000	1352600000	319420000	213020000	27249000	150280000	35491000	294810000	1170400000	570770000	5	5	5	40.6	40.6	40.6	19.571	0	32.926	1917200000	11	2	5	4	2	5	4	2	5	4	2	5	4
110	A2A9K3;Q8BMK0	A2A9K3;Q8BMK0	Centrosomal protein of 85 kDa	Cep85	tr|A2A9K3|A2A9K3_MOUSE Centrosomal protein of 85 kDa OS=Mus musculus GN=Cep85 PE=4 SV=1;sp|Q8BMK0|CEP85_MOUSE Centrosomal protein of 85 kDa OS=Mus musculus GN=Cep85 PE=2 SV=2	4439300	114520000	9107400	2613600	90599	2337100	185870	0	81855000	28941000	2	2	2	3.7	3.7	3.7	85.097	0.0016347	2.4771	128070000	3	1	1	1	1	1	1	1	1	1	1	1	1
111	E9PX48;A2A9M5;Q8R1A4-2;Q8R1A4;A2A9M4;Q3U806;Q7TPP0;A2AW79;F6ZJ55	E9PX48;A2A9M5;Q8R1A4-2;Q8R1A4	Dedicator of cytokinesis protein 7	Dock7	tr|E9PX48|E9PX48_MOUSE Dedicator of cytokinesis protein 7 OS=Mus musculus GN=Dock7 PE=1 SV=1;tr|A2A9M5|A2A9M5_MOUSE Dedicator of cytokinesis protein 7 OS=Mus musculus GN=Dock7 PE=1 SV=1;sp|Q8R1A4-2|DOCK7_MOUSE Isoform 2 of Dedicator of cytokinesis protein	9598200000	9748700000	9284801000	238600000	79985000	81239000	77373000	10208000000	9449000000	9558400000	75	75	71	49	49	47	238.09	0	323.31	28632000000	273	61	61	64	61	61	64	57	58	61	94	84	95
112	A2A9Q2;Q8BHG1;Q8R320;A6PWC3;Q8CIJ0;Q8R1H1;Q3V3G9;Q9Z153	A2A9Q2;Q8BHG1;Q8R320;A6PWC3;Q8CIJ0;Q8R1H1	Nardilysin	Nrd1	tr|A2A9Q2|A2A9Q2_MOUSE Nardilysin OS=Mus musculus GN=Nrd1 PE=1 SV=1;sp|Q8BHG1|NRDC_MOUSE Nardilysin OS=Mus musculus GN=Nrd1 PE=1 SV=1;tr|Q8R320|Q8R320_MOUSE Nardilysin, N-arginine dibasic convertase, NRD convertase 1 OS=Mus musculus GN=Nrd1 PE=2 SV=1;tr|A6	9297700000	7989400000	6516400000	366210000	143040000	122910000	100250000	8577300000	8065600000	8356400000	40	40	40	42	42	42	140.62	0	216.79	23803000000	151	35	38	35	35	38	35	35	38	35	51	53	47
113	A2A9W3;Q3UBZ5;A2A9W1;Q8BTE1;Q3UBZ5-2	A2A9W3;Q3UBZ5;A2A9W1;Q8BTE1	MIF4G domain-containing protein	Mif4gd	tr|A2A9W3|A2A9W3_MOUSE MIF4G domain-containing protein OS=Mus musculus GN=Mif4gd PE=4 SV=1;sp|Q3UBZ5|MI4GD_MOUSE MIF4G domain-containing protein OS=Mus musculus GN=Mif4gd PE=2 SV=1;tr|A2A9W1|A2A9W1_MOUSE MIF4G domain-containing protein (Fragment) OS=Mus mu	162460000	116600000	121110000	26678000	10831000	7773000	8074200	148190000	118310000	192530000	3	3	3	21.7	21.7	21.7	23.311	0.00016265	6.7016	400170000	8	2	2	1	2	2	1	2	2	1	4	2	2
114	A2A9W7;Q8BMI3;S4R2D2;A2A9W5	A2A9W7;Q8BMI3;S4R2D2	ADP-ribosylation factor-binding protein GGA3	Gga3	tr|A2A9W7|A2A9W7_MOUSE ADP-ribosylation factor-binding protein GGA3 OS=Mus musculus GN=Gga3 PE=4 SV=1;sp|Q8BMI3|GGA3_MOUSE ADP-ribosylation factor-binding protein GGA3 OS=Mus musculus GN=Gga3 PE=2 SV=2;tr|S4R2D2|S4R2D2_MOUSE ADP-ribosylation factor-binding	501020000	208690000	160410000	29004000	16701000	6956200	5347100	292780000	263490000	439890000	8	8	8	24.1	24.1	24.1	70.192	0	16.088	870120000	13	4	7	3	4	7	3	4	7	3	3	7	3
115	A2AA85;Q6NXN1-2;Q6NXN1	A2AA85;Q6NXN1-2;Q6NXN1	SUZ domain-containing protein 1	Szrd1	tr|A2AA85|A2AA85_MOUSE SUZ domain-containing protein 1 (Fragment) OS=Mus musculus GN=Szrd1 PE=1 SV=1;sp|Q6NXN1-2|SZRD1_MOUSE Isoform 2 of SUZ domain-containing protein 1 OS=Mus musculus GN=Szrd1;sp|Q6NXN1|SZRD1_MOUSE SUZ domain-containing protein 1 OS=Mus	191850000	11431000	98263000	33505000	21317000	1270100	10918000	93789000	0	180530000	5	5	5	52.1	52.1	52.1	16.277	0	19.527	301540000	4	3	3	2	3	3	2	3	3	2	2	1	1
116	Q542L0;A2AAN0;Q3USE0;O35250-2;O35250;Q7TPT3;Q3TIP4;Q69ZS4;A2AAN3;A2AAN4	Q542L0;A2AAN0;Q3USE0;O35250-2;O35250;Q7TPT3;Q3TIP4;Q69ZS4	Exocyst complex component 7	Exoc7;mKIAA1067	tr|Q542L0|Q542L0_MOUSE Exocyst complex component 7, isoform CRA_a OS=Mus musculus GN=Exoc7 PE=2 SV=1;tr|A2AAN0|A2AAN0_MOUSE Exocyst complex component 7 OS=Mus musculus GN=Exoc7 PE=4 SV=1;tr|Q3USE0|Q3USE0_MOUSE Exocyst complex component 7, isoform CRA_b OS=	1288500000	1376500000	840910000	92260000	33907000	36223000	22129000	1257200000	1177200000	1294000000	25	25	25	48.2	48.2	48.2	75.158	0	61.154	3505900000	48	18	15	15	18	15	15	18	15	15	19	14	15
117	Q8CAR4;F7D0T8;A2AAP0;A2AAN9;Q3TEL6-2;Q3TEL6	Q8CAR4;F7D0T8;A2AAP0;A2AAN9;Q3TEL6-2;Q3TEL6	RING finger protein 157	Rnf157	tr|Q8CAR4|Q8CAR4_MOUSE Putative uncharacterized protein (Fragment) OS=Mus musculus GN=Rnf157 PE=2 SV=1;tr|F7D0T8|F7D0T8_MOUSE RING finger protein 157 (Fragment) OS=Mus musculus GN=Rnf157 PE=4 SV=1;tr|A2AAP0|A2AAP0_MOUSE RING finger protein 157 OS=Mus muscu	8484600	0	0	471370	471370	0	0	10251000	0	0	1	1	1	3.8	3.8	3.8	54.784	0.0092652	1.5844	8484600	1	1	0	0	1	0	0	1	0	0	1	0	0
118	A2AAY5;B9EJ37;Q3TDV5;Q8BY34;Q571L4;Q5DTZ1	A2AAY5;B9EJ37	SH3 and PX domain-containing protein 2B	Sh3pxd2b	sp|A2AAY5|SPD2B_MOUSE SH3 and PX domain-containing protein 2B OS=Mus musculus GN=Sh3pxd2b PE=1 SV=1;tr|B9EJ37|B9EJ37_MOUSE SH3 and PX domains 2B OS=Mus musculus GN=Sh3pxd2b PE=2 SV=1	4788000000	5364400000	4798400000	262290000	83999000	94113000	84182000	5281400000	4555100000	5298800000	31	31	29	44.9	44.9	43	101.52	0	170.82	14951000000	112	28	25	23	28	25	23	26	23	21	38	41	33
119	A2ABP9;Q921W8	A2ABP9;Q921W8	Secreted and transmembrane protein 1A	Sectm1a	tr|A2ABP9|A2ABP9_MOUSE Secreted and transmembrane protein 1A OS=Mus musculus GN=Sectm1a PE=4 SV=1;sp|Q921W8|SCT1A_MOUSE Secreted and transmembrane protein 1A OS=Mus musculus GN=Sectm1a PE=2 SV=1	0	0	0	0	0	0	0	0	0	0	1	1	1	7.3	7.3	7.3	21.422	1	-2	0	0	1	0	0	1	0	0	1	0	0	0	0	0
120	A2ABV5;A2BDP0;A2BDN7;A2ABV5-2;A2ABV5-3;A2ABV5-4	A2ABV5;A2BDP0	Mediator of RNA polymerase II transcription subunit 14	Med14	sp|A2ABV5|MED14_MOUSE Mediator of RNA polymerase II transcription subunit 14 OS=Mus musculus GN=Med14 PE=1 SV=1;tr|A2BDP0|A2BDP0_MOUSE Mediator of RNA polymerase II transcription subunit 14 OS=Mus musculus GN=Med14 PE=4 SV=1	1104600000	1001600000	2470200000	60216000	14535000	13179000	32502000	1694900000	1599500000	1683500000	23	23	23	27.2	27.2	27.2	160.96	0	71.077	4576400000	63	15	17	17	15	17	17	15	17	17	25	19	19
121	Q3TLU0;A2ABY3;Q540F5;Q3USD5;Q922E4;Q9CTB5	Q3TLU0;A2ABY3;Q540F5;Q3USD5;Q922E4	Ethanolamine-phosphate cytidylyltransferase	Pcyt2	tr|Q3TLU0|Q3TLU0_MOUSE Putative uncharacterized protein OS=Mus musculus GN=Pcyt2 PE=2 SV=1;tr|A2ABY3|A2ABY3_MOUSE Ethanolamine-phosphate cytidylyltransferase OS=Mus musculus GN=Pcyt2 PE=4 SV=1;tr|Q540F5|Q540F5_MOUSE CTP:ethanolaminephosphate cytidylyltrans	96557000	28208000	124220000	9576500	3713700	1084900	4777800	63803000	103770000	74565000	4	4	4	13.7	13.7	13.7	43.46	0	7.5008	248990000	5	2	1	3	2	1	3	2	1	3	2	1	2
122	A2AC07;Q8C4X1;Q8C4X1-3;Q8C4X1-2;Q8C4X1-4	A2AC07;Q8C4X1;Q8C4X1-3;Q8C4X1-2;Q8C4X1-4	Centromere protein X	Stra13	tr|A2AC07|A2AC07_MOUSE Centromere protein X OS=Mus musculus GN=Stra13 PE=4 SV=1;sp|Q8C4X1|CENPX_MOUSE Centromere protein X OS=Mus musculus GN=Stra13 PE=2 SV=1;sp|Q8C4X1-3|CENPX_MOUSE Isoform 3 of Centromere protein X OS=Mus musculus GN=Stra13;sp|Q8C4X1-2|C	0	19974000	9561500	3692000	0	2496800	1195200	0	19163000	0	2	2	2	20.2	20.2	20.2	13.107	0.001253	2.8715	29536000	2	0	1	1	0	1	1	0	1	1	0	1	1
123	F8WHN4;A2ACC6;E9Q0J2;B2RRF1;Q8BQZ4;A2ACC7;Q8BQZ4-2	F8WHN4;A2ACC6;E9Q0J2;B2RRF1;Q8BQZ4;A2ACC7	Ral GTPase-activating protein subunit beta	Ralgapb	tr|F8WHN4|F8WHN4_MOUSE Ral GTPase-activating protein subunit beta OS=Mus musculus GN=Ralgapb PE=4 SV=1;tr|A2ACC6|A2ACC6_MOUSE Ral GTPase-activating protein subunit beta OS=Mus musculus GN=Ralgapb PE=4 SV=1;tr|E9Q0J2|E9Q0J2_MOUSE Ral GTPase-activating prote	626260000	405770000	527220000	18786000	7545300	4888800	6352100	577520000	489010000	567400000	18	18	18	22.5	22.5	22.5	166.17	0	45.691	1559200000	39	12	12	10	12	12	10	12	12	10	15	12	12
124	Q61833;A2ACG7;Q3U505;Q9DBG6	Q61833;A2ACG7;Q3U505;Q9DBG6	Dolichyl-diphosphooligosaccharide--protein glycosyltransferase subunit 2	Rpn2	tr|Q61833|Q61833_MOUSE Ribophorin OS=Mus musculus GN=Rpn2 PE=2 SV=1;tr|A2ACG7|A2ACG7_MOUSE Dolichyl-diphosphooligosaccharide--protein glycosyltransferase subunit 2 OS=Mus musculus GN=Rpn2 PE=4 SV=1;tr|Q3U505|Q3U505_MOUSE Putative uncharacterized protein (F	37533000000	33256000000	32023000000	3545300000	1294200000	1146800000	1104200000	34188000000	34101000000	35695000000	25	25	25	52.6	52.6	52.6	66.301	0	323.31	102810000000	192	25	22	23	25	22	23	25	22	23	71	56	65
125	A2ACH6;Q544D4;P82347	A2ACH6;Q544D4;P82347	Delta-sarcoglycan	Sgcd	tr|A2ACH6|A2ACH6_MOUSE Delta-sarcoglycan OS=Mus musculus GN=Sgcd PE=4 SV=1;tr|Q544D4|Q544D4_MOUSE Sarcoglycan, delta (Dystrophin-associated glycoprotein) OS=Mus musculus GN=Sgcd PE=2 SV=1;sp|P82347|SGCD_MOUSE Delta-sarcoglycan OS=Mus musculus GN=Sgcd PE=1	0	0	0	0	0	0	0	0	0	0	1	1	1	4.2	4.2	4.2	21.694	1	-2	0	0	1	1	1	1	1	1	1	1	1	0	0	0
126	A2ACJ2	A2ACJ2	Fanconi anemia-associated protein of 100 kDa	Faap100	sp|A2ACJ2|FP100_MOUSE Fanconi anemia-associated protein of 100 kDa OS=Mus musculus GN=Faap100 PE=2 SV=1	78119000	44723000	39479000	3959100	1905300	1090800	962910	86135000	53245000	55861000	4	4	4	9.1	9.1	9.1	94.28	0.00016057	6.3229	162320000	7	2	3	2	2	3	2	2	3	2	2	3	2
127	A4FUW1;A2ACM0;Q8K4Q0;Q8K4Q0-2;E9PXZ5;Q6ZPU3;Q8K4Q0-5;Q8K4Q0-3;Q8K4Q0-4;F7BQS0;F7CN67;F7B6I3;A7MAY7;F6U5L3	A4FUW1;A2ACM0;Q8K4Q0;Q8K4Q0-2	Regulatory-associated protein of mTOR	Rptor	tr|A4FUW1|A4FUW1_MOUSE 4932417H02Rik protein (Fragment) OS=Mus musculus GN=Rptor PE=2 SV=1;tr|A2ACM0|A2ACM0_MOUSE Regulatory-associated protein of mTOR OS=Mus musculus GN=Rptor PE=1 SV=1;sp|Q8K4Q0|RPTOR_MOUSE Regulatory-associated protein of mTOR OS=Mus mu	1071200000	1256500000	1064000000	49878000	15753000	18478000	15647000	1385300000	1295200000	980120000	21	21	21	25.6	25.6	25.6	149.24	0	72.504	3391700000	56	14	18	16	14	18	16	14	18	16	18	17	21
128	Q8K1G9;A2ACQ1;A2ACP9	Q8K1G9;A2ACQ1		Dhx35	tr|Q8K1G9|Q8K1G9_MOUSE DEAH (Asp-Glu-Ala-His) box polypeptide 35 OS=Mus musculus GN=Dhx35 PE=2 SV=1;tr|A2ACQ1|A2ACQ1_MOUSE Protein Dhx35 OS=Mus musculus GN=Dhx35 PE=4 SV=1	66167000	152370000	52965000	7757100	1890500	4353300	1513300	91783000	116920000	94070000	5	5	5	10.2	10.2	10.2	75.876	0	12.276	271500000	11	3	4	2	3	4	2	3	4	2	3	5	3
129	A2ACV5;Q9CYC5;B0QZT4	A2ACV5;Q9CYC5;B0QZT4	Kinetochore-associated protein DSN1 homolog	Dsn1	tr|A2ACV5|A2ACV5_MOUSE Kinetochore-associated protein DSN1 homolog (Fragment) OS=Mus musculus GN=Dsn1 PE=4 SV=1;sp|Q9CYC5|DSN1_MOUSE Kinetochore-associated protein DSN1 homolog OS=Mus musculus GN=Dsn1 PE=2 SV=1;tr|B0QZT4|B0QZT4_MOUSE Kinetochore-associated	72279000	198850000	176620000	26338000	4251700	11697000	10390000	147170000	172040000	152700000	4	4	4	23.3	23.3	23.3	26.446	0	13.692	447750000	10	2	4	4	2	4	4	2	4	4	2	4	4
130	A2ACV6;E1U8D0;Q69ZW6;Q8CBB8;Q8CD47;B8JJI7;H3BL83;Q6NZL0;Q3UHU5-2;Q3UHU5-3;Q3UHU5	A2ACV6;E1U8D0	Protein SOGA1;N-terminal form;C-terminal 80 kDa form	Soga1	tr|A2ACV6|A2ACV6_MOUSE Protein SOGA1 OS=Mus musculus GN=Soga1 PE=4 SV=1;sp|E1U8D0|SOGA1_MOUSE Protein SOGA1 OS=Mus musculus GN=Soga1 PE=1 SV=3	458400000	851910000	624780000	17125000	4056600	7539100	5529000	555650000	624110000	747130000	31	30	30	25.3	24.9	24.9	183.14	0	73.69	1935100000	51	14	24	19	13	24	18	13	24	18	12	22	17
131	A2AD03;Q3UR39;Q8CBI2;Q9QXG2;Q9CS14	A2AD03;Q3UR39;Q8CBI2;Q9QXG2	Rab proteins geranylgeranyltransferase component A 1	Chm	tr|A2AD03|A2AD03_MOUSE Rab proteins geranylgeranyltransferase component A 1 OS=Mus musculus GN=Chm PE=4 SV=1;tr|Q3UR39|Q3UR39_MOUSE Rab proteins geranylgeranyltransferase component A 1 OS=Mus musculus GN=Chm PE=2 SV=1;tr|Q8CBI2|Q8CBI2_MOUSE Putative unchar	1018300000	1233300000	1354500000	112690000	31823000	38540000	42327000	1103100000	1211600000	1461200000	15	15	14	43.5	43.5	42.3	73.663	0	83.329	3606100000	46	11	14	11	11	14	11	10	13	10	15	18	13
132	A2AD39;Q60988;D6RH61;F6WX10;Q8BQI9;B7ZNX3;B2RUI9;F6VXM5	A2AD39;Q60988;D6RH61;F6WX10;Q8BQI9;B7ZNX3;B2RUI9	SCL-interrupting locus protein homolog	Stil	tr|A2AD39|A2AD39_MOUSE SCL-interrupting locus protein homolog OS=Mus musculus GN=Stil PE=4 SV=1;sp|Q60988|STIL_MOUSE SCL-interrupting locus protein homolog OS=Mus musculus GN=Stil PE=1 SV=1;tr|D6RH61|D6RH61_MOUSE SCL-interrupting locus protein homolog OS=M	63921000	49729000	51793000	2585100	998770	777020	809270	75164000	48011000	78837000	4	4	4	4.8	4.8	4.8	138.76	0	10.29	165440000	7	3	2	2	3	2	2	3	2	2	3	2	2
133	A2ADA5;A2ADA5-2;A2ADA5-3	A2ADA5;A2ADA5-2;A2ADA5-3	tRNA pseudouridine synthase-like 1	Pusl1	sp|A2ADA5|PUSL1_MOUSE tRNA pseudouridine synthase-like 1 OS=Mus musculus GN=Pusl1 PE=2 SV=1;sp|A2ADA5-2|PUSL1_MOUSE Isoform 2 of tRNA pseudouridine synthase-like 1 OS=Mus musculus GN=Pusl1;sp|A2ADA5-3|PUSL1_MOUSE Isoform 3 of tRNA pseudouridine synthase-li	1116400000	752040000	341540000	147340000	74430000	50136000	22769000	771790000	957330000	851690000	7	7	7	30.6	30.6	30.6	31.992	0	24.264	2210000000	19	6	4	4	6	4	4	6	4	4	8	6	5
134	A2ADA6;Q6NXL5;Q3UH98;Q4QQN0;Q8C8T5	A2ADA6;Q6NXL5;Q3UH98;Q4QQN0		Acap3	tr|A2ADA6|A2ADA6_MOUSE Protein Acap3 OS=Mus musculus GN=Acap3 PE=4 SV=1;tr|Q6NXL5|Q6NXL5_MOUSE ArfGAP with coiled-coil, ankyrin repeat and PH domains 3 OS=Mus musculus GN=Acap3 PE=2 SV=1;tr|Q3UH98|Q3UH98_MOUSE Putative uncharacterized protein OS=Mus muscul	26203000	106380000	46258000	4064700	595530	2417800	1051300	52332000	70309000	57296000	9	8	8	17.1	15.9	15.9	92.333	0	12.03	178850000	12	3	6	5	2	5	4	2	5	4	2	6	4
135	A2ADB1;A2ADB0;Q3UV27	A2ADB1;A2ADB0		Spen	tr|A2ADB1|A2ADB1_MOUSE Msx2-interacting protein OS=Mus musculus GN=Spen PE=1 SV=1;tr|A2ADB0|A2ADB0_MOUSE Msx2-interacting protein OS=Mus musculus GN=Spen PE=1 SV=1	284130000	193480000	213310000	3472000	1427800	972280	1071900	202840000	248590000	298770000	13	13	1	7.1	7.1	0.4	395.98	0	17.088	690920000	19	6	7	7	6	7	7	1	1	1	5	6	8
136	A2ADE0;Z4YJW6;Q80TQ5;Q80TQ5-2;Q80TQ5-3	A2ADE0;Z4YJW6;Q80TQ5;Q80TQ5-2;Q80TQ5-3	Pleckstrin homology domain-containing family M member 2	Plekhm2	tr|A2ADE0|A2ADE0_MOUSE Pleckstrin homology domain-containing family M member 2 OS=Mus musculus GN=Plekhm2 PE=4 SV=1;tr|Z4YJW6|Z4YJW6_MOUSE Pleckstrin homology domain-containing family M member 2 OS=Mus musculus GN=Plekhm2 PE=4 SV=1;sp|Q80TQ5|PKHM2_MOUSE Pl	176730000	143300000	183050000	11434000	4016600	3256700	4160200	208980000	143890000	183920000	8	8	8	9.8	9.8	9.8	112.15	0	19.931	503070000	15	5	7	5	5	7	5	5	7	5	5	5	5
137	F6WHL0;A2ADH1;Q9CQY5;F6TBV1;Q9CQY5-2;Q9CQY5-3	F6WHL0;A2ADH1;Q9CQY5;F6TBV1;Q9CQY5-2;Q9CQY5-3	Magnesium transporter protein 1	Magt1	tr|F6WHL0|F6WHL0_MOUSE Magnesium transporter protein 1 (Fragment) OS=Mus musculus GN=Magt1 PE=4 SV=1;tr|A2ADH1|A2ADH1_MOUSE Magnesium transporter protein 1 OS=Mus musculus GN=Magt1 PE=4 SV=1;sp|Q9CQY5|MAGT1_MOUSE Magnesium transporter protein 1 OS=Mus musc	813210000	1315100000	851840000	165570000	45178000	73063000	47324000	967510000	1165900000	963270000	8	8	8	20.7	20.7	20.7	38.839	0	63.572	2980200000	26	5	7	6	5	7	6	5	7	6	10	8	8
138	A2ADR8;Q8R3G1	A2ADR8;Q8R3G1	Nuclear inhibitor of protein phosphatase 1	Ppp1r8	tr|A2ADR8|A2ADR8_MOUSE Nuclear inhibitor of protein phosphatase 1 OS=Mus musculus GN=Ppp1r8 PE=4 SV=1;sp|Q8R3G1|PP1R8_MOUSE Nuclear inhibitor of protein phosphatase 1 OS=Mus musculus GN=Ppp1r8 PE=1 SV=1	2640800000	2787000000	2923900000	491270000	155340000	163940000	171990000	2349600000	2876100000	3352000000	12	12	12	55.4	55.4	55.4	38.399	0	71.369	8351600000	61	9	11	10	9	11	10	9	11	10	20	20	21
139	Q62013;B1B0X6;Q62012;Q32MH2;L7MU67;E9QA14;B1B0X0;A2BI72;A2BI02;A2ADW8	Q62013;B1B0X6;Q62012;Q32MH2;L7MU67;E9QA14;B1B0X0;A2BI72;A2BI02;A2ADW8		Gm15114;Ott;Gm15107;Gm15097;Gm15093;Gm15080;Gm15128	tr|Q62013|Q62013_MOUSE Ott protein (Fragment) OS=Mus musculus PE=2 SV=1;tr|B1B0X6|B1B0X6_MOUSE Protein Gm15114 OS=Mus musculus GN=Gm15114 PE=4 SV=1;tr|Q62012|Q62012_MOUSE Ott protein OS=Mus musculus GN=Ott PE=2 SV=1;tr|Q32MH2|Q32MH2_MOUSE Ovary testis tran	4745200	6498000	8582800	639550	153070	209610	276860	5597300	6141500	9739500	1	1	1	5.5	5.5	5.5	34.597	0.0042367	1.9977	19826000	3	1	1	1	1	1	1	1	1	1	1	1	1
140	A2ADY9;Q9DAF3	A2ADY9	Protein DDI1 homolog 2	Ddi2	sp|A2ADY9|DDI2_MOUSE Protein DDI1 homolog 2 OS=Mus musculus GN=Ddi2 PE=1 SV=1	1915600000	1659300000	1959000000	221360000	76626000	66374000	78358000	2188300000	2006800000	1686600000	15	15	15	55.1	55.1	55.1	44.59	0	116.61	5533900000	52	11	10	10	11	10	10	11	10	10	19	15	18
141	A2AE27;Q9DBT5	A2AE27;Q9DBT5	AMP deaminase 2	Ampd2	tr|A2AE27|A2AE27_MOUSE AMP deaminase 2 OS=Mus musculus GN=Ampd2 PE=1 SV=1;sp|Q9DBT5|AMPD2_MOUSE AMP deaminase 2 OS=Mus musculus GN=Ampd2 PE=1 SV=1	1828700000	1765400000	1668600000	116950000	40637000	39231000	37079000	1760300000	1864900000	1727600000	23	22	22	29.9	28.8	28.8	94.695	0	65.664	5262600000	63	17	19	18	16	18	17	16	18	17	16	25	22
142	A2AEK1;B3V099;A2AEJ8;F6ZKC7	A2AEK1;B3V099		Cstf2	tr|A2AEK1|A2AEK1_MOUSE AlphaCstF-64 variant 4 OS=Mus musculus GN=Cstf2 PE=2 SV=1;tr|B3V099|B3V099_MOUSE BetaCstF-64 variant 1 OS=Mus musculus GN=Cstf2 PE=2 SV=1	0	22434000	40722000	2745900	0	975370	1770500	0	21522000	43787000	16	1	1	40.3	1.8	1.8	58.571	0.0016333	2.47	63156000	2	13	15	11	0	1	1	0	1	1	0	1	1
143	A2AEM2;Q99LI2;Z4YMG1	A2AEM2;Q99LI2	Chloride channel CLIC-like protein 1	Clcc1	tr|A2AEM2|A2AEM2_MOUSE Chloride channel CLIC-like 1, isoform CRA_a OS=Mus musculus GN=Clcc1 PE=1 SV=1;sp|Q99LI2|CLCC1_MOUSE Chloride channel CLIC-like protein 1 OS=Mus musculus GN=Clcc1 PE=1 SV=1	656440000	908470000	845640000	70898000	19307000	26720000	24872000	738090000	820300000	879870000	13	13	13	36.9	36.9	36.9	61.239	0	49.121	2410500000	33	9	11	11	9	11	11	9	11	11	10	11	12
144	Q3UIP1;A2AER4;Q9R0M8	Q3UIP1;A2AER4;Q9R0M8	UDP-galactose translocator	Slc35a2	tr|Q3UIP1|Q3UIP1_MOUSE Solute carrier family 35 (UDP-galactose transporter), member 2, isoform CRA_c OS=Mus musculus GN=Slc35a2 PE=2 SV=1;tr|A2AER4|A2AER4_MOUSE UDP-galactose translocator OS=Mus musculus GN=Slc35a2 PE=4 SV=1;sp|Q9R0M8|S35A2_MOUSE UDP-galac	205260000	55271000	217080000	34115000	14661000	3947900	15506000	187530000	118760000	213310000	2	2	2	10	10	10	40.765	0.00014863	4.3032	477610000	8	2	1	2	2	1	2	2	1	2	3	2	3
145	A2AER7;Q91VJ5;A2AER8;A2AER9	A2AER7;Q91VJ5;A2AER8;A2AER9	Polyglutamine-binding protein 1	Pqbp1	tr|A2AER7|A2AER7_MOUSE Pqbp1 protein OS=Mus musculus GN=Pqbp1 PE=2 SV=1;sp|Q91VJ5|PQBP1_MOUSE Polyglutamine-binding protein 1 OS=Mus musculus GN=Pqbp1 PE=1 SV=1;tr|A2AER8|A2AER8_MOUSE Polyglutamine-binding protein 1 (Fragment) OS=Mus musculus GN=Pqbp1 PE=4	328600000	331220000	317860000	97767000	32860000	33122000	31786000	331230000	353010000	306140000	4	4	4	35	35	35	30.597	0	40.978	977670000	17	4	3	4	4	3	4	4	3	4	6	5	6
146	Q3TDY8;A2AES3;A2AES5;A2AES4;Q3U2S4-2;Q3U2S4	Q3TDY8;A2AES3;A2AES5;A2AES4;Q3U2S4-2;Q3U2S4	OTU domain-containing protein 5	Otud5	tr|Q3TDY8|Q3TDY8_MOUSE Putative uncharacterized protein (Fragment) OS=Mus musculus GN=Otud5 PE=2 SV=1;tr|A2AES3|A2AES3_MOUSE OTU domain-containing protein 5 OS=Mus musculus GN=Otud5 PE=4 SV=1;tr|A2AES5|A2AES5_MOUSE OTU domain-containing protein 5 OS=Mus mu	44713000	0	23694000	2631100	1719700	0	911320	30459000	0	38522000	3	3	3	8.7	8.7	8.7	55.86	0.00014988	4.4755	68408000	5	3	1	1	3	1	1	3	1	1	3	1	1
147	Q99N72;Q8C067;Q7TNJ5;A2AET8;Q8BLE2;A2AEU1	Q99N72;Q8C067;Q7TNJ5;A2AET8;Q8BLE2;A2AEU1		Mcf2	tr|Q99N72|Q99N72_MOUSE Mcf2 proto-oncogene protein OS=Mus musculus GN=Mcf2 PE=1 SV=1;tr|Q8C067|Q8C067_MOUSE Mcf.2 transforming sequence OS=Mus musculus GN=Mcf2 PE=2 SV=1;tr|Q7TNJ5|Q7TNJ5_MOUSE Mcf2 proto-oncogene protein OS=Mus musculus GN=Mcf2 PE=2 SV=1;t	0	0	0	0	0	0	0	0	0	0	2	1	1	1.6	1	1	107.27	1	-2	0	0	1	1	2	0	0	1	0	0	1	0	0	0
148	A2AEW0;A2AEW1;Q64092-4;Q64092;Q3U1L5;Q64092-3;Q64092-2;Z4YLF7;Q05BT8;Q8K420;I6L9I6;Q8C6Y4;Q32MU7;E9PZ28;E9QL92;Q3U2D2;Q9WTW4;Q08874-6;Q08874-5;Q08874-9;Q08874-8;Q08874-3;Q08874-7;Q08874-2;Q08874-4;Q08874	A2AEW0;A2AEW1;Q64092-4;Q64092;Q3U1L5;Q64092-3;Q64092-2	Transcription factor E3	Tfe3	tr|A2AEW0|A2AEW0_MOUSE Transcription factor E3 OS=Mus musculus GN=Tfe3 PE=4 SV=1;tr|A2AEW1|A2AEW1_MOUSE Transcription factor E3 OS=Mus musculus GN=Tfe3 PE=4 SV=1;sp|Q64092-4|TFE3_MOUSE Isoform 4 of Transcription factor E3 OS=Mus musculus GN=Tfe3;sp|Q64092|	172950000	156040000	133030000	22001000	8235500	7430700	6334800	152720000	173090000	160680000	5	5	5	9.9	9.9	9.9	57.736	0	8.6986	462020000	14	4	3	4	4	3	4	4	3	4	5	4	5
149	A2AEW9;A2AEW8;Q8VD04;Q3T9D9;A2AEW5;Q3TZ55;A2AEW6	A2AEW9;A2AEW8;Q8VD04;Q3T9D9;A2AEW5	GRIP1-associated protein 1	Gripap1	tr|A2AEW9|A2AEW9_MOUSE GRIP1-associated protein 1 OS=Mus musculus GN=Gripap1 PE=1 SV=1;tr|A2AEW8|A2AEW8_MOUSE GRIP1-associated protein 1 OS=Mus musculus GN=Gripap1 PE=1 SV=1;sp|Q8VD04|GRAP1_MOUSE GRIP1-associated protein 1 OS=Mus musculus GN=Gripap1 PE=1 S	883260000	1056600000	1185900000	55817000	15772000	18868000	21176000	970910000	1043800000	1058400000	20	20	20	37	37	37	90.764	0	148.84	3125700000	50	15	19	13	15	19	13	15	19	13	17	19	14
150	A2AEX8;A2AEX6;P97447;A2AEY1;A2AEY0;A2AEX9;Q9DAH0;Q8CDC8;Q6P8P1;O70403	A2AEX8;A2AEX6;P97447;A2AEY1	Four and a half LIM domains protein 1	Fhl1	tr|A2AEX8|A2AEX8_MOUSE Four and a half LIM domains 1, isoform CRA_b OS=Mus musculus GN=Fhl1 PE=1 SV=1;tr|A2AEX6|A2AEX6_MOUSE Four and a half LIM domains protein 1 OS=Mus musculus GN=Fhl1 PE=1 SV=1;sp|P97447|FHL1_MOUSE Four and a half LIM domains protein 1	15426000000	14057000000	15253000000	2354500000	811890000	739830000	802760000	14370000000	16602000000	16624000000	14	14	4	57.4	57.4	17.2	33.563	0	134.72	44735000000	123	13	14	14	13	14	14	3	4	4	37	46	40
151	A2AEY2;A2AEX7;P97447-2	A2AEY2;A2AEX7;P97447-2	Four and a half LIM domains protein 1	Fhl1	tr|A2AEY2|A2AEY2_MOUSE Four and a half LIM domains 1, isoform CRA_c OS=Mus musculus GN=Fhl1 PE=1 SV=1;tr|A2AEX7|A2AEX7_MOUSE Four and a half LIM domains protein 1 OS=Mus musculus GN=Fhl1 PE=1 SV=1;sp|P97447-2|FHL1_MOUSE Isoform 2 of Four and a half LIM dom	35744000	37525000	0	3185600	1554100	1631500	0	31174000	31430000	0	11	1	1	39.3	2.5	2.5	36.261	1	-2	73269000	2	11	11	10	1	1	0	1	1	0	1	1	0
152	A2AFF6;O35638;Q3TG33;Q8BSB5;Q3UQG8;F6XLF4	A2AFF6;O35638	Cohesin subunit SA-2	Stag2	tr|A2AFF6|A2AFF6_MOUSE Cohesin subunit SA-2 OS=Mus musculus GN=Stag2 PE=1 SV=1;sp|O35638|STAG2_MOUSE Cohesin subunit SA-2 OS=Mus musculus GN=Stag2 PE=1 SV=3	3834800000	4158600000	3453100000	168330000	56394000	61156000	50780000	3913100000	3907400000	3830200000	42	42	38	43	43	40.2	145.7	0	179.9	11446000000	143	34	35	35	34	35	35	31	31	31	47	47	49
153	A2AFG7;A2AFG8;Q6PGJ3;P11627;Q9QYQ7;F6UIL7;Q684Q2;B7ZCD3;F7A5H7	A2AFG7;A2AFG8;Q6PGJ3;P11627	Neural cell adhesion molecule L1	L1cam	tr|A2AFG7|A2AFG7_MOUSE Neural cell adhesion molecule L1 OS=Mus musculus GN=L1cam PE=4 SV=1;tr|A2AFG8|A2AFG8_MOUSE Neural cell adhesion molecule L1 OS=Mus musculus GN=L1cam PE=4 SV=1;tr|Q6PGJ3|Q6PGJ3_MOUSE L1 cell adhesion molecule OS=Mus musculus GN=L1cam	592620000	529920000	569330000	25252000	8845100	7909200	8497500	747730000	461900000	641240000	12	12	12	16.4	16.4	16.4	139.82	0	58.462	1691900000	35	6	9	9	6	9	9	6	9	9	9	13	13
154	Q3UHF8;Q3UHE9;B1AV20;A2AFI8;B9EI38;Q80XA6	Q3UHF8;Q3UHE9;B1AV20;A2AFI8;B9EI38;Q80XA6	RalBP1-associated Eps domain-containing protein 2	Reps2	tr|Q3UHF8|Q3UHF8_MOUSE Putative uncharacterized protein OS=Mus musculus GN=Reps2 PE=2 SV=1;tr|Q3UHE9|Q3UHE9_MOUSE Putative uncharacterized protein (Fragment) OS=Mus musculus GN=Reps2 PE=2 SV=1;tr|B1AV20|B1AV20_MOUSE RalBP1-associated Eps domain-containing	0	0	0	0	0	0	0	0	0	0	2	1	1	4.6	2.4	2.4	50.77	1	-2	0	0	1	1	0	1	0	0	1	0	0	0	0	0
155	A2AFM3;A2AFM4;Q68G58;Q68G58-2	A2AFM3;A2AFM4;Q68G58;Q68G58-2	DNA-(apurinic or apyrimidinic site) lyase 2	Apex2	tr|A2AFM3|A2AFM3_MOUSE Apurinic/apyrimidinic endonuclease 2, isoform CRA_a OS=Mus musculus GN=Apex2 PE=4 SV=1;tr|A2AFM4|A2AFM4_MOUSE DNA-(apurinic or apyrimidinic site) lyase 2 OS=Mus musculus GN=Apex2 PE=4 SV=1;sp|Q68G58|APEX2_MOUSE DNA-(apurinic or apyri	47094000	12547000	0	2209000	1744200	464710	0	61339000	3184900	0	3	3	3	7.2	7.2	7.2	57.415	0.00014981	4.4701	59642000	2	2	2	0	2	2	0	2	2	0	1	1	0
156	A2AFQ0;Q7TMY8;Q4JG03;Q7TMY8-3;Q7TMY8-4;Q7TMY8-2;Q8BKX3;F6XP90;Q8C0G8;Q9CU76;F6UYC1;Q3TL29	A2AFQ0;Q7TMY8;Q4JG03;Q7TMY8-3;Q7TMY8-4;Q7TMY8-2	E3 ubiquitin-protein ligase HUWE1	Huwe1	tr|A2AFQ0|A2AFQ0_MOUSE E3 ubiquitin-protein ligase HUWE1 OS=Mus musculus GN=Huwe1 PE=1 SV=1;sp|Q7TMY8|HUWE1_MOUSE E3 ubiquitin-protein ligase HUWE1 OS=Mus musculus GN=Huwe1 PE=1 SV=5;tr|Q4JG03|Q4JG03_MOUSE Mcl-1 ubiquitin ligase OS=Mus musculus GN=Huwe1 PE	10894000000	13107000000	10562000000	167780000	52884000	63627000	51272000	12546000000	11794000000	11636000000	105	105	78	34.3	34.3	26.8	482.69	0	323.31	34563000000	391	76	92	89	76	92	89	59	67	66	121	149	121
157	Q99N15;A2AFQ2;Q9CYT3;O08756	Q99N15;A2AFQ2;Q9CYT3;O08756	3-hydroxyacyl-CoA dehydrogenase type-2	Hsd17b10	tr|Q99N15|Q99N15_MOUSE 17beta-hydroxysteroid dehydrogenase type 10/short chain L-3-hydroxyacyl-CoA dehydrogenase OS=Mus musculus GN=Hsd17b10 PE=1 SV=1;tr|A2AFQ2|A2AFQ2_MOUSE 3-hydroxyacyl-CoA dehydrogenase type-2 OS=Mus musculus GN=Hsd17b10 PE=1 SV=1;tr|Q9	10261000000	9496400000	9377300000	1820900000	641320000	593530000	586080000	10422000000	10209000000	8655500000	17	17	17	82	82	82	27.273	0	148.52	29135000000	122	14	14	15	14	14	15	14	14	15	45	35	42
158	A2AFQ9;E9PUU4;Q8BX17;B2RQ83;B7ZN04;Q6KAS0;Q3TR97;F7CKD6	A2AFQ9;E9PUU4;Q8BX17;B2RQ83;B7ZN04;Q6KAS0;Q3TR97	Gem-associated protein 5	Gemin5	tr|A2AFQ9|A2AFQ9_MOUSE Gem-associated protein 5 OS=Mus musculus GN=Gemin5 PE=4 SV=1;tr|E9PUU4|E9PUU4_MOUSE Gem-associated protein 5 OS=Mus musculus GN=Gemin5 PE=4 SV=1;sp|Q8BX17|GEMI5_MOUSE Gem-associated protein 5 OS=Mus musculus GN=Gemin5 PE=2 SV=2;tr|B2	3483600000	3818600000	3822800000	120920000	37865000	41507000	41552000	3590300000	3654200000	4244900000	42	42	42	34.8	34.8	34.8	166.52	0	140.52	11125000000	138	30	32	29	30	32	29	30	32	29	43	51	44
159	O54817;A2AG22;O88933;Q9Z2U3	O54817;A2AG22;O88933;Q9Z2U3		Esx1	tr|O54817|O54817_MOUSE Paired-like homeodomain containing protein OS=Mus musculus GN=Esx1 PE=2 SV=1;tr|A2AG22|A2AG22_MOUSE Protein Esx1 OS=Mus musculus GN=Esx1 PE=4 SV=1;tr|O88933|O88933_MOUSE Homeobox protein SPX1 OS=Mus musculus GN=Esx1 PE=2 SV=1;tr|Q9Z2	52559000	81805000	0	12215000	4778100	7436900	0	78906000	49572000	0	2	2	2	8.3	8.3	8.3	35.968	0	7.938	134360000	4	1	2	0	1	2	0	1	2	0	2	2	0
160	F6YPG3;A2AG36;Q562G0;B9EIU5;Q5DU55;Q9JJI6	F6YPG3;A2AG36;Q562G0;B9EIU5;Q5DU55;Q9JJI6	GPI ethanolamine phosphate transferase 3	Pigo	tr|F6YPG3|F6YPG3_MOUSE GPI ethanolamine phosphate transferase 3 (Fragment) OS=Mus musculus GN=Pigo PE=4 SV=1;tr|A2AG36|A2AG36_MOUSE GPI ethanolamine phosphate transferase 3 OS=Mus musculus GN=Pigo PE=4 SV=1;tr|Q562G0|Q562G0_MOUSE GPI ethanolamine phosphate	26618000	27123000	0	2067000	1023800	1043200	0	35106000	28393000	0	2	2	2	5.3	5.3	5.3	74.655	0.00015232	4.869	53741000	4	2	2	0	2	2	0	2	2	0	2	2	0
161	A2AG58-2;A2AG58	A2AG58-2;A2AG58	Uncharacterized protein CXorf23 homolog		sp|A2AG58-2|CX023_MOUSE Isoform 2 of Uncharacterized protein CXorf23 homolog OS=Mus musculus;sp|A2AG58|CX023_MOUSE Uncharacterized protein CXorf23 homolog OS=Mus musculus PE=2 SV=1	31803000	51998000	0	2043900	775690	1268200	0	29378000	0	0	3	3	3	4.9	4.9	4.9	80.608	0.0024311	2.3266	83801000	3	1	2	0	1	2	0	1	2	0	1	2	0
162	B9EJ97;A2AG68;Q64430;Q3TAY6;Q3T9Y7;B1AQ57;Q64446	B9EJ97;A2AG68;Q64430	Copper-transporting ATPase 1	Atp7a	tr|B9EJ97|B9EJ97_MOUSE Atp7a protein OS=Mus musculus GN=Atp7a PE=2 SV=1;tr|A2AG68|A2AG68_MOUSE Copper-transporting ATPase 1 OS=Mus musculus GN=Atp7a PE=1 SV=1;sp|Q64430|ATP7A_MOUSE Copper-transporting ATPase 1 OS=Mus musculus GN=Atp7a PE=1 SV=3	1108700000	530460000	602330000	32021000	15838000	7578000	8604700	983560000	734340000	833530000	17	17	17	18.7	18.7	18.7	161.98	0	46.345	2241500000	39	9	11	11	9	11	11	9	11	11	13	10	16
163	A2AGH8;A2AGH9;A2AGH6-2;A2AGH6;A2AGH6-3;Q2NLB9;Q6ZPK9;H7BX07;Q8BQM9-4;Q8BQM9-3	A2AGH8;A2AGH9;A2AGH6-2;A2AGH6	Mediator of RNA polymerase II transcription subunit 12	Med12	tr|A2AGH8|A2AGH8_MOUSE Mediator of RNA polymerase II transcription subunit 12 OS=Mus musculus GN=Med12 PE=1 SV=1;tr|A2AGH9|A2AGH9_MOUSE Mediator of RNA polymerase II transcription subunit 12 OS=Mus musculus GN=Med12 PE=1 SV=1;sp|A2AGH6-2|MED12_MOUSE Isofor	302830000	762430000	672090000	14849000	2588300	6516500	5744400	609630000	696690000	530640000	23	23	20	17.5	17.5	15.6	240.87	0	54.988	1737300000	38	9	16	16	9	16	16	8	15	13	8	18	12
164	A2AGQ3;A2AGQ2;A2AGQ8;A2AGQ7;A2AGQ9;A2AGQ5;A2AGQ6;E9QN47;A2AGQ4;Q80U28-14;A6PWP8;A2AGR1;A2AGR0;Q80U28-13;Q80U28-12;Q80U28-11;Q80U28-10;Q80U28-9;Q80U28-8;Q80U28-7;Q80U28-6;Q80U28-5;Q80U28-4;Q80U28-3;Q80U28-2;Q80U28-15;Q80U28	A2AGQ3;A2AGQ2;A2AGQ8;A2AGQ7;A2AGQ9;A2AGQ5;A2AGQ6;E9QN47;A2AGQ4;Q80U28-14;A6PWP8;A2AGR1;A2AGR0;Q80U28-13;Q80U28-12;Q80U28-11;Q80U28-10;Q80U28-9;Q80U28-8;Q80U28-7;Q80U28-6;Q80U28-5;Q80U28-4;Q80U28-3;Q80U28-2;Q80U28-15;Q80U28	MAP kinase-activating death domain protein	Madd	tr|A2AGQ3|A2AGQ3_MOUSE MAP kinase-activating death domain protein OS=Mus musculus GN=Madd PE=1 SV=1;tr|A2AGQ2|A2AGQ2_MOUSE MAP kinase-activating death domain protein OS=Mus musculus GN=Madd PE=1 SV=1;tr|A2AGQ8|A2AGQ8_MOUSE MAP kinase-activating death domai	2683800	39574000	15400000	739190	34408	507350	197430	0	33623000	22191000	3	3	3	3.1	3.1	3.1	170.7	0.00014775	4.1902	57657000	5	1	2	2	1	2	2	1	2	2	1	2	2
165	A2AH22-2;A2AH22-6;A2AH22;A2AH22-7;A2AH22-3;A2AH22-5;A2AH22-4	A2AH22-2;A2AH22-6;A2AH22;A2AH22-7;A2AH22-3;A2AH22-5	Activating molecule in BECN1-regulated autophagy protein 1	Ambra1	sp|A2AH22-2|AMRA1_MOUSE Isoform 2 of Activating molecule in BECN1-regulated autophagy protein 1 OS=Mus musculus GN=Ambra1;sp|A2AH22-6|AMRA1_MOUSE Isoform 6 of Activating molecule in BECN1-regulated autophagy protein 1 OS=Mus musculus GN=Ambra1;sp|A2AH22|AM	62872000	62204000	0	1985300	997970	987360	0	51251000	80259000	0	7	7	7	6.6	6.6	6.6	133.11	0	6.9094	125080000	9	5	5	1	5	5	1	5	5	1	4	4	1
166	A2AH75;Q60575-3;Q3UY61;Q3UUN4;Q05BI6;Q05BP4	A2AH75;Q60575-3;Q3UY61	Kinesin-like protein;Kinesin-like protein KIF1B	Kif1b	tr|A2AH75|A2AH75_MOUSE Kinesin family member 1B, isoform CRA_a OS=Mus musculus GN=Kif1b PE=3 SV=1;sp|Q60575-3|KIF1B_MOUSE Isoform 3 of Kinesin-like protein KIF1B OS=Mus musculus GN=Kif1b;tr|Q3UY61|Q3UY61_MOUSE Putative uncharacterized protein (Fragment) OS	52896000	8698400	18219000	1093300	724600	119160	249570	52197000	0	0	19	4	4	22	5.7	5.7	130.05	0.00015576	5.4584	79813000	5	13	12	14	2	1	1	2	1	1	3	1	1
167	Q543F1;Q3TMY8;A2AH85;Q6A0E3;O08810;Q3U5Q3;Q7TMX4;G3UXK8;G3UZ25	Q543F1;Q3TMY8;A2AH85;Q6A0E3;O08810;Q3U5Q3;Q7TMX4	116 kDa U5 small nuclear ribonucleoprotein component	Eftud2	tr|Q543F1|Q543F1_MOUSE Putative uncharacterized protein OS=Mus musculus GN=Eftud2 PE=2 SV=1;tr|Q3TMY8|Q3TMY8_MOUSE Putative uncharacterized protein OS=Mus musculus GN=Eftud2 PE=2 SV=1;tr|A2AH85|A2AH85_MOUSE 116 kDa U5 small nuclear ribonucleoprotein compon	27262000000	25264000000	26337000000	1460400000	504860000	467860000	487730000	29063000000	26670000000	27867000000	50	49	1	67.9	66.8	1.6	109.36	0	323.31	78864000000	327	43	46	45	42	45	44	1	1	1	117	103	107
168	A2AHC3;A2AHC4;A2AHC3-2;F6Q2D3;F6QF29;F6W3X2;V9GXD7	A2AHC3;A2AHC4;A2AHC3-2	Calmodulin-regulated spectrin-associated protein 1	Camsap1	sp|A2AHC3|CAMP1_MOUSE Calmodulin-regulated spectrin-associated protein 1 OS=Mus musculus GN=Camsap1 PE=1 SV=1;tr|A2AHC4|A2AHC4_MOUSE Calmodulin-regulated spectrin-associated protein 1 (Fragment) OS=Mus musculus GN=Camsap1 PE=4 SV=1;sp|A2AHC3-2|CAMP1_MOUSE	1329600000	1242200000	933670000	34368000	13036000	12179000	9153600	1081700000	1317000000	1334900000	28	28	28	24.9	24.9	24.9	175.89	0	71.012	3505500000	64	19	22	18	19	22	18	19	22	18	22	24	18
169	E9PV92;A2AHG4;E9QKW9;A2AHG2;Q6ZPK0-6;Q6ZPK0-8;Q6ZPK0-3;Q6ZPK0;F6U6L3;F6TKP4;A2AHG3;F6URE6;D3Z764;Q6ZPK0-5;Q6ZPK0-7;Q6ZPK0-4;Q6ZPK0-9;Q6ZPK0-2	E9PV92;A2AHG4;E9QKW9;A2AHG2;Q6ZPK0-6;Q6ZPK0-8;Q6ZPK0-3;Q6ZPK0;F6U6L3	PHD finger protein 21A	Phf21a	tr|E9PV92|E9PV92_MOUSE PHD finger protein 21A OS=Mus musculus GN=Phf21a PE=4 SV=2;tr|A2AHG4|A2AHG4_MOUSE PHD finger protein 21A OS=Mus musculus GN=Phf21a PE=4 SV=1;tr|E9QKW9|E9QKW9_MOUSE PHD finger protein 21A OS=Mus musculus GN=Phf21a PE=4 SV=2;tr|A2AHG2|	38934000	50906000	87238000	4540500	998310	1305300	2236900	69909000	52105000	75657000	5	5	5	12.4	12.4	12.4	67.776	0	8.5111	177080000	9	2	3	3	2	3	3	2	3	3	2	4	3
170	A2AHJ7;A2AHK0;Q80UP3;Q91YS0	A2AHJ7;A2AHK0;Q80UP3;Q91YS0	Diacylglycerol kinase;Diacylglycerol kinase zeta	Dgkz	tr|A2AHJ7|A2AHJ7_MOUSE Diacylglycerol kinase OS=Mus musculus GN=Dgkz PE=3 SV=1;tr|A2AHK0|A2AHK0_MOUSE Diacylglycerol kinase OS=Mus musculus GN=Dgkz PE=3 SV=1;sp|Q80UP3|DGKZ_MOUSE Diacylglycerol kinase zeta OS=Mus musculus GN=Dgkz PE=1 SV=2;tr|Q91YS0|Q91YS0	72237000	46546000	25840000	2835700	1416400	912660	506660	65955000	41566000	30264000	3	3	3	5.2	5.2	5.2	105.9	0.0001626	6.6984	144620000	9	3	3	2	3	3	2	3	3	2	3	4	2
171	Q6XZC3;Q4U221;Q60761;A2AHM0;Q9D2H4;Q99PF1;Q8K3I5;Q8JZK8;Q60763	Q6XZC3;Q4U221;Q60761;A2AHM0;Q9D2H4;Q99PF1;Q8K3I5;Q8JZK8;Q60763		Mageb2;Mageb1;Mageb3	tr|Q6XZC3|Q6XZC3_MOUSE MAGEB1/2 OS=Mus musculus PE=2 SV=1;tr|Q4U221|Q4U221_MOUSE Melanoma antigen, family B, 2 OS=Mus musculus GN=Mageb1 PE=2 SV=1;tr|Q60761|Q60761_MOUSE Protein Mageb1 OS=Mus musculus GN=Mageb1 PE=4 SV=3;tr|A2AHM0|A2AHM0_MOUSE Protein Mage	28856000	30059000	24888000	4655800	1603100	1670000	1382700	43922000	27191000	30857000	2	2	2	9.4	9.4	9.4	35.92	0.00016113	6.4011	83804000	6	1	2	1	1	2	1	1	2	1	2	2	2
172	A2AHX9;Q9QWX2;Q5HZH3;O35843;Q64373-3;Q64373-4;Q64373;Q99N35;Q99N36;Q3T9W4;Q64373-2;A2AHX8;A2AHX7	A2AHX9;Q9QWX2;Q5HZH3;O35843;Q64373-3;Q64373-4;Q64373;Q99N35;Q99N36;Q3T9W4;Q64373-2;A2AHX8	Bcl-2-like protein 1	Bcl2l1;Bclx	tr|A2AHX9|A2AHX9_MOUSE Bcl-2-like protein 1 (Fragment) OS=Mus musculus GN=Bcl2l1 PE=4 SV=1;tr|Q9QWX2|Q9QWX2_MOUSE Bcl-2-like protein 1 (Fragment) OS=Mus musculus GN=Bcl2l1 PE=4 SV=1;tr|Q5HZH3|Q5HZH3_MOUSE BCL2-like 1 OS=Mus musculus GN=Bcl2l1 PE=2 SV=1;tr|	859290000	528330000	754750000	238040000	95477000	58704000	83861000	656870000	789400000	755710000	5	5	5	53.2	53.2	53.2	17.127	0	27.8	2142400000	15	4	3	4	4	3	4	4	3	4	5	4	6
173	Q6GTZ3;A2AHY3;P20067-2;P20067	Q6GTZ3;A2AHY3;P20067-2;P20067	DNA-binding protein inhibitor ID-1	Id1	tr|Q6GTZ3|Q6GTZ3_MOUSE Idb1 protein OS=Mus musculus GN=Id1 PE=2 SV=1;tr|A2AHY3|A2AHY3_MOUSE DNA-binding protein inhibitor ID-1 OS=Mus musculus GN=Id1 PE=4 SV=1;sp|P20067-2|ID1_MOUSE Isoform Short of DNA-binding protein inhibitor ID-1 OS=Mus musculus GN=Id1	90501000	90404000	122410000	43331000	12929000	12915000	17487000	99057000	93374000	130820000	3	3	3	31.8	31.8	31.8	15.56	0	9.5591	303310000	12	3	3	3	3	3	3	3	3	3	4	4	4
174	A2AHZ2;Q06985;A2AHZ3	A2AHZ2;Q06985	E3 ubiquitin-protein ligase;E3 ubiquitin-protein ligase SIAH1B	Siah1b	tr|A2AHZ2|A2AHZ2_MOUSE E3 ubiquitin-protein ligase OS=Mus musculus GN=Siah1b PE=3 SV=1;sp|Q06985|SIA1B_MOUSE E3 ubiquitin-protein ligase SIAH1B OS=Mus musculus GN=Siah1b PE=2 SV=2	16508000	81089000	50000000	10543000	1179100	5792100	3571400	35418000	67120000	56645000	3	3	1	10.6	10.6	4.3	31.154	0.00043085	3.5072	147600000	5	1	3	1	1	3	1	0	1	0	1	3	1
175	A2AI05;A2AI05-3;A2AI05-2;F6XCS1;E0CXI9	A2AI05;A2AI05-3;A2AI05-2;F6XCS1	NADPH-dependent diflavin oxidoreductase 1	Ndor1	sp|A2AI05|NDOR1_MOUSE NADPH-dependent diflavin oxidoreductase 1 OS=Mus musculus GN=Ndor1 PE=2 SV=1;sp|A2AI05-3|NDOR1_MOUSE Isoform 3 of NADPH-dependent diflavin oxidoreductase 1 OS=Mus musculus GN=Ndor1;sp|A2AI05-2|NDOR1_MOUSE Isoform 2 of NADPH-dependent	121690000	121540000	194580000	16215000	4506900	4501700	7206800	293930000	111530000	88237000	8	8	8	22.7	22.7	22.7	67.182	0	17.097	437810000	15	4	6	5	4	6	5	4	6	5	5	6	4
176	Q3UZ62;A2AI52;Q80U87;Q3UQ26;Q58E42;Q3TQM7	Q3UZ62;A2AI52;Q80U87;Q3UQ26	Ubiquitin carboxyl-terminal hydrolase;Ubiquitin carboxyl-terminal hydrolase 8	Usp8	tr|Q3UZ62|Q3UZ62_MOUSE Ubiquitin carboxyl-terminal hydrolase OS=Mus musculus GN=Usp8 PE=2 SV=1;tr|A2AI52|A2AI52_MOUSE Ubiquitin carboxyl-terminal hydrolase OS=Mus musculus GN=Usp8 PE=1 SV=1;sp|Q80U87|UBP8_MOUSE Ubiquitin carboxyl-terminal hydrolase 8 OS=Mu	921140000	949660000	1043500000	42857000	13546000	13966000	15345000	1071800000	919160000	1051400000	18	18	18	20.1	20.1	20.1	122.65	0	43.86	2914300000	51	14	12	13	14	12	13	14	12	13	17	15	19
177	Q3URG0;A2AI78;Q80YA9-2;Q80YA9	Q3URG0;A2AI78;Q80YA9-2;Q80YA9	Connector enhancer of kinase suppressor of ras 2	Cnksr2	tr|Q3URG0|Q3URG0_MOUSE Putative uncharacterized protein (Fragment) OS=Mus musculus GN=Cnksr2 PE=2 SV=1;tr|A2AI78|A2AI78_MOUSE Connector enhancer of kinase suppressor of ras 2 OS=Mus musculus GN=Cnksr2 PE=1 SV=1;sp|Q80YA9-2|CNKR2_MOUSE Isoform 2 of Connecto	0	0	0	0	0	0	0	0	0	0	1	1	1	2.2	2.2	2.2	56.257	1	-2	0	0	1	1	1	1	1	1	1	1	1	0	0	0
178	A2AI89;A2AI88;A2AI87;P18826-2;P18826;Q8CBA7;A2AI91;Q3UV91;Q8BSV5;Q3TQJ0	A2AI89;A2AI88;A2AI87;P18826-2;P18826;Q8CBA7;A2AI91;Q3UV91;Q8BSV5	Phosphorylase b kinase regulatory subunit alpha, skeletal muscle isoform	Phka1	tr|A2AI89|A2AI89_MOUSE Phosphorylase b kinase regulatory subunit alpha, skeletal muscle isoform OS=Mus musculus GN=Phka1 PE=4 SV=1;tr|A2AI88|A2AI88_MOUSE Phosphorylase b kinase regulatory subunit alpha, skeletal muscle isoform OS=Mus musculus GN=Phka1 PE=4	357880000	302820000	222600000	13383000	5422400	4588200	3372700	374770000	321840000	270840000	16	16	16	21.1	21.1	21.1	135.6	0	35.939	883300000	26	9	10	5	9	10	5	9	10	5	11	10	5
179	Q3TB52;Q6PDD9;Q80XC7;A2AIH4;Q3TU17;A2AIH5;Q64323	Q3TB52;Q6PDD9;Q80XC7;A2AIH4;Q3TU17;A2AIH5;Q64323	N-acetylglucosaminyl-phosphatidylinositol biosynthetic protein	Piga	tr|Q3TB52|Q3TB52_MOUSE Phosphatidylinositol glycan anchor biosynthesis, class A, isoform CRA_b OS=Mus musculus GN=Piga PE=2 SV=1;tr|Q6PDD9|Q6PDD9_MOUSE Piga protein (Fragment) OS=Mus musculus GN=Piga PE=2 SV=1;tr|Q80XC7|Q80XC7_MOUSE Piga protein (Fragment)	0	24347000	27788000	6516900	0	3043300	3473600	0	28810000	0	2	2	2	21.3	21.3	21.3	19.101	0.0015071	2.5813	52135000	2	0	1	1	0	1	1	0	1	1	0	1	1
180	A2AIL4	A2AIL4	NADH dehydrogenase (ubiquinone) complex I, assembly factor 6	Ndufaf6	sp|A2AIL4|NDUF6_MOUSE NADH dehydrogenase (ubiquinone) complex I, assembly factor 6 OS=Mus musculus GN=Ndufaf6 PE=3 SV=1	204810000	373100000	278780000	45089000	10780000	19637000	14672000	277530000	319520000	316610000	7	7	7	34.5	34.5	34.5	38.362	0	27.728	856690000	19	4	5	6	4	5	6	4	5	6	7	5	7
181	E9PZY8;A2AIV2;A2AIV2-2;Q8CFK9;REV__Q8BI55	E9PZY8;A2AIV2;A2AIV2-2	Protein virilizer homolog	1110037F02Rik;Kiaa1429	tr|E9PZY8|E9PZY8_MOUSE Protein 1110037F02Rik OS=Mus musculus GN=1110037F02Rik PE=1 SV=1;sp|A2AIV2|VIR_MOUSE Protein virilizer homolog OS=Mus musculus GN=Kiaa1429 PE=1 SV=1;sp|A2AIV2-2|VIR_MOUSE Isoform 2 of Protein virilizer homolog OS=Mus musculus GN=Kiaa	1328200000	1005000000	1304900000	33376000	12185000	9219800	11971000	1520300000	1064200000	1288300000	36	36	36	24.8	24.8	24.8	207.17	0	119.38	3638000000	82	20	26	25	20	26	25	20	26	25	26	27	29
182	A2AIX1;E9QAT4;Q811L5;Q80U43;F7BPW6;Q8K000;Q8R336;Q3TRA8;Q3TZR0	A2AIX1;E9QAT4;Q811L5		Sec16a	tr|A2AIX1|A2AIX1_MOUSE Protein Sec16a OS=Mus musculus GN=Sec16a PE=1 SV=1;tr|E9QAT4|E9QAT4_MOUSE Protein Sec16a OS=Mus musculus GN=Sec16a PE=1 SV=1;tr|Q811L5|Q811L5_MOUSE Sec16a protein (Fragment) OS=Mus musculus GN=Sec16a PE=2 SV=1	1223000000	1413100000	1265800000	38633000	12109000	13991000	12533000	1317900000	1352300000	1531200000	35	35	35	25.7	25.7	25.7	256.47	0	115.22	3901900000	79	17	27	23	17	27	23	17	27	23	22	31	26
183	Q8BTW7;Q923C1;A2AJ15;Q8R3F8;A2AJ14;Q8BIL8	Q8BTW7;Q923C1;A2AJ15	alpha-1,2-Mannosidase;Endoplasmic reticulum mannosyl-oligosaccharide 1,2-alpha-mannosidase	Man1b1	tr|Q8BTW7|Q8BTW7_MOUSE Putative uncharacterized protein (Fragment) OS=Mus musculus GN=Man1b1 PE=2 SV=1;tr|Q923C1|Q923C1_MOUSE Man1b1 protein (Fragment) OS=Mus musculus GN=Man1b1 PE=2 SV=1;sp|A2AJ15|MA1B1_MOUSE Endoplasmic reticulum mannosyl-oligosaccharide	63673000	111030000	247220000	18344000	2768400	4827300	10749000	111950000	164020000	150000000	7	7	7	18.5	18.5	18.5	52.393	0	8.9552	421920000	12	3	6	4	3	6	4	3	6	4	3	6	3
184	Q8CFL4;A2AJ23;A2AJ21;Q64322;A2AJ19;A2AJ20;Q925Q2	Q8CFL4;A2AJ23;A2AJ21;Q64322;A2AJ19;A2AJ20;Q925Q2	Neural proliferation differentiation and control protein 1	Npdc1	tr|Q8CFL4|Q8CFL4_MOUSE Npdc1 protein OS=Mus musculus GN=Npdc1 PE=2 SV=1;tr|A2AJ23|A2AJ23_MOUSE Neural proliferation differentiation and control protein 1 (Fragment) OS=Mus musculus GN=Npdc1 PE=4 SV=1;tr|A2AJ21|A2AJ21_MOUSE Neural proliferation differentiat	18300000	0	38303000	4354100	1407700	0	2946400	0	0	41329000	2	2	2	11.2	11.2	11.2	26.923	0.0052281	1.796	56604000	1	1	0	1	1	0	1	1	0	1	1	0	0
185	A2AJ26;P41234;Q6ZPZ4	A2AJ26;P41234;Q6ZPZ4	ATP-binding cassette sub-family A member 2	Abca2	tr|A2AJ26|A2AJ26_MOUSE ATP-binding cassette sub-family A member 2 OS=Mus musculus GN=Abca2 PE=1 SV=1;sp|P41234|ABCA2_MOUSE ATP-binding cassette sub-family A member 2 OS=Mus musculus GN=Abca2 PE=1 SV=4;tr|Q6ZPZ4|Q6ZPZ4_MOUSE MKIAA1062 protein (Fragment) OS=	294370000	2816800000	262700000	30671000	2676100	25607000	2388200	814120000	1234000000	899930000	17	17	15	10	10	9	270.52	0	36.229	3373800000	22	8	10	8	8	10	8	8	8	8	4	10	8
186	A2AJ72;Q3TIX6;Q3ULP9;F7AM43;A2AJ71;F6S444;F6W2V3;Q8BYI4	A2AJ72;Q3TIX6;Q3ULP9		Fubp3	tr|A2AJ72|A2AJ72_MOUSE MCG130458 OS=Mus musculus GN=Fubp3 PE=4 SV=1;tr|Q3TIX6|Q3TIX6_MOUSE Protein Fubp3 OS=Mus musculus GN=Fubp3 PE=2 SV=1;tr|Q3ULP9|Q3ULP9_MOUSE Putative uncharacterized protein OS=Mus musculus GN=Fubp3 PE=2 SV=1	5338500000	4982400000	6377500000	428170000	136890000	127750000	163530000	6078300000	5070400000	5741200000	25	25	25	63.4	63.4	63.4	61.447	0	154.74	16698000000	138	21	23	21	21	23	21	21	23	21	46	45	47
187	A2AJ88-3;A2AJ88-2;A2AJ88	A2AJ88-3;A2AJ88-2;A2AJ88	Patatin-like phospholipase domain-containing protein 7	Pnpla7	sp|A2AJ88-3|PLPL7_MOUSE Isoform 3 of Patatin-like phospholipase domain-containing protein 7 OS=Mus musculus GN=Pnpla7;sp|A2AJ88-2|PLPL7_MOUSE Isoform 2 of Patatin-like phospholipase domain-containing protein 7 OS=Mus musculus GN=Pnpla7;sp|A2AJ88|PLPL7_MOUS	0	11991000	20748000	711720	0	260680	451040	0	0	29024000	2	2	2	3	3	3	91.941	0.0015193	2.7109	32739000	2	0	1	1	0	1	1	0	1	1	0	1	1
188	F6VTS9;A2AJ95;Q3TY90;A2AJ96;A2AJ92;F6TKU5;Q99NF2-4;Q99NF2-3;Q99NF2-2;Q99NF2	F6VTS9;A2AJ95;Q3TY90;A2AJ96;A2AJ92;F6TKU5;Q99NF2-4;Q99NF2-3;Q99NF2-2;Q99NF2	NMDA receptor synaptonuclear signaling and neuronal migration factor	Nsmf	tr|F6VTS9|F6VTS9_MOUSE NMDA receptor synaptonuclear-signaling and neuronal migration factor (Fragment) OS=Mus musculus GN=Nsmf PE=4 SV=1;tr|A2AJ95|A2AJ95_MOUSE NMDA receptor synaptonuclear-signaling and neuronal migration factor OS=Mus musculus GN=Nsmf PE=	0	0	0	0	0	0	0	0	0	0	1	1	1	2.1	2.1	2.1	32.918	1	-2	0	0	0	0	1	0	0	1	0	0	1	0	0	0
189	A2AJB1-2;A2AJB1	A2AJB1-2;A2AJB1	Coiled-coil domain-containing protein 183	Ccdc183	sp|A2AJB1-2|CC183_MOUSE Isoform 2 of Coiled-coil domain-containing protein 183 OS=Mus musculus GN=Ccdc183;sp|A2AJB1|CC183_MOUSE Coiled-coil domain-containing protein 183 OS=Mus musculus GN=Ccdc183 PE=2 SV=1	0	0	0	0	0	0	0	0	0	0	1	1	1	3.9	3.9	3.9	36.178	1	-2	0	0	0	0	1	0	0	1	0	0	1	0	0	0
190	A2AJG0;Q80UU2;Q8BX36	A2AJG0;Q80UU2;Q8BX36	Ribonuclease P protein subunit p38	Rpp38	tr|A2AJG0|A2AJG0_MOUSE Ribonuclease P protein subunit p38 OS=Mus musculus GN=Rpp38 PE=4 SV=1;sp|Q80UU2|RPP38_MOUSE Ribonuclease P protein subunit p38 OS=Mus musculus GN=Rpp38 PE=2 SV=1;tr|Q8BX36|Q8BX36_MOUSE Putative uncharacterized protein (Fragment) OS=M	695050000	669710000	876390000	131830000	40885000	39395000	51552000	780160000	805860000	766780000	14	14	14	46.1	46.1	46.1	31.189	0	34.081	2241100000	42	10	12	12	10	12	12	10	12	12	14	15	13
191	A2AJH3;Q3THR4;O70311;Q8CFK1	A2AJH3;Q3THR4;O70311;Q8CFK1	Glycylpeptide N-tetradecanoyltransferase;Glycylpeptide N-tetradecanoyltransferase 2	Nmt2	tr|A2AJH3|A2AJH3_MOUSE Glycylpeptide N-tetradecanoyltransferase OS=Mus musculus GN=Nmt2 PE=3 SV=1;tr|Q3THR4|Q3THR4_MOUSE Glycylpeptide N-tetradecanoyltransferase OS=Mus musculus GN=Nmt2 PE=2 SV=1;sp|O70311|NMT2_MOUSE Glycylpeptide N-tetradecanoyltransferas	759960000	666370000	1234000000	83134000	23749000	20824000	38561000	776370000	966410000	890460000	11	8	8	31.3	22.5	22.5	56.984	0	35.61	2660300000	23	8	8	10	5	5	7	5	5	7	5	6	12
192	A2AJI0;A2AJI0-2;F6WF36	A2AJI0;A2AJI0-2;F6WF36	MAP7 domain-containing protein 1	Map7d1	sp|A2AJI0|MA7D1_MOUSE MAP7 domain-containing protein 1 OS=Mus musculus GN=Map7d1 PE=1 SV=1;sp|A2AJI0-2|MA7D1_MOUSE Isoform 2 of MAP7 domain-containing protein 1 OS=Mus musculus GN=Map7d1;tr|F6WF36|F6WF36_MOUSE MAP7 domain-containing protein 1 (Fragment) OS	1893600000	1712300000	1863100000	118890000	41165000	37224000	40503000	1926600000	1789500000	1813300000	17	17	1	26.1	26.1	1.5	93.275	0	56.209	5469000000	56	14	13	15	14	13	15	1	1	1	20	17	19
193	A2AJK6;A2AJK6-3	A2AJK6;A2AJK6-3	Chromodomain-helicase-DNA-binding protein 7	Chd7	sp|A2AJK6|CHD7_MOUSE Chromodomain-helicase-DNA-binding protein 7 OS=Mus musculus GN=Chd7 PE=1 SV=1;sp|A2AJK6-3|CHD7_MOUSE Isoform 3 of Chromodomain-helicase-DNA-binding protein 7 OS=Mus musculus GN=Chd7	16228000	52757000	91431000	1055400	106760	347090	601520	41457000	53760000	68440000	9	3	3	3.2	1.3	1.3	334.06	0.00016005	6.214	160420000	4	4	8	3	1	3	2	1	3	2	0	3	1
194	Q6LC96;Q3UMU4;A2AJP1;P28700;A2AJP2	Q6LC96;Q3UMU4;A2AJP1;P28700	Retinoic acid receptor RXR-alpha	Rxra	tr|Q6LC96|Q6LC96_MOUSE RXR alpha 2 OS=Mus musculus GN=Rxra PE=2 SV=1;tr|Q3UMU4|Q3UMU4_MOUSE Putative uncharacterized protein OS=Mus musculus GN=Rxra PE=2 SV=1;tr|A2AJP1|A2AJP1_MOUSE Retinoid X receptor alpha OS=Mus musculus GN=Rxra PE=2 SV=1;sp|P28700|RXRA	55811000	133550000	163300000	14107000	2232400	5342100	6532000	99771000	153320000	133670000	5	5	4	14.8	14.8	11.6	48.21	0	14.195	352660000	11	2	4	5	2	4	5	1	3	4	0	4	7
195	Q05BF9;A8Y5Q1;A2AJP9;A8Y5Q0;A2AJQ0;Q3UV70	Q05BF9;A8Y5Q1;A2AJP9;A8Y5Q0;A2AJQ0;Q3UV70	[Pyruvate dehydrogenase [acetyl-transferring]]-phosphatase 1, mitochondrial	Pdp1	tr|Q05BF9|Q05BF9_MOUSE Ppm2c protein OS=Mus musculus GN=Pdp1 PE=2 SV=1;tr|A8Y5Q1|A8Y5Q1_MOUSE MCG54027, isoform CRA_b OS=Mus musculus GN=Pdp1 PE=2 SV=1;tr|A2AJP9|A2AJP9_MOUSE MCG54027, isoform CRA_a OS=Mus musculus GN=Pdp1 PE=3 SV=2;tr|A8Y5Q0|A8Y5Q0_MOUSE	146880000	240610000	109740000	14624000	4320000	7076800	3227500	179790000	199490000	131580000	10	10	10	29.4	29.4	29.4	61.181	0	17.328	497230000	13	4	7	4	4	7	4	4	7	4	4	5	4
196	A2AJQ2;A2AJQ3-2;A2AJQ3;D6RI72;A2AJQ1	A2AJQ2;A2AJQ3-2;A2AJQ3	Probable C-mannosyltransferase DPY19L4	Dpy19l4	tr|A2AJQ2|A2AJQ2_MOUSE Probable C-mannosyltransferase DPY19L4 (Fragment) OS=Mus musculus GN=Dpy19l4 PE=4 SV=1;sp|A2AJQ3-2|D19L4_MOUSE Isoform 2 of Probable C-mannosyltransferase DPY19L4 OS=Mus musculus GN=Dpy19l4;sp|A2AJQ3|D19L4_MOUSE Probable C-mannosyltr	21271000	143380000	0	6098000	787810	5310200	0	25699000	149720000	0	3	3	3	9.5	9.5	9.5	57.754	0	14.991	164650000	6	1	3	0	1	3	0	1	3	0	1	5	0
197	A2AJR8;Q9CZY2	A2AJR8;Q9CZY2	Transcription elongation factor A protein-like 8	Tceal8	tr|A2AJR8|A2AJR8_MOUSE Transcription elongation factor A protein-like 8 (Fragment) OS=Mus musculus GN=Tceal8 PE=4 SV=1;sp|Q9CZY2|TCAL8_MOUSE Transcription elongation factor A protein-like 8 OS=Mus musculus GN=Tceal8 PE=2 SV=1	76967000	39489000	30893000	73674000	38483000	19745000	15446000	41175000	56955000	49939000	2	2	2	87	87	87	4.9681	0.00014797	4.2057	147350000	4	2	1	1	2	1	1	2	1	1	2	1	1
198	B2RUA1;A2AJT5;A2AJT4;A2AJT3;Q3TV92	B2RUA1;A2AJT5;A2AJT4;A2AJT3;Q3TV92	Arginine/serine-rich protein PNISR	Pnisr	tr|B2RUA1|B2RUA1_MOUSE Splicing factor, arginine/serine-rich 18 OS=Mus musculus GN=Pnisr PE=2 SV=1;tr|A2AJT5|A2AJT5_MOUSE Arginine/serine-rich protein PNISR OS=Mus musculus GN=Pnisr PE=4 SV=1;sp|A2AJT4|PNISR_MOUSE Arginine/serine-rich protein PNISR OS=Mus	6351500	69112000	0	3144300	264650	2879700	0	6351500	0	0	2	2	2	2.9	2.9	2.9	93.077	0.00015368	5.102	75464000	3	1	1	1	1	1	1	1	1	1	1	1	1
199	Q3TM66;A2AK40;Q148S1;O35149	Q3TM66;A2AK40;Q148S1;O35149	Zinc transporter 4	Slc30a4	tr|Q3TM66|Q3TM66_MOUSE Putative uncharacterized protein OS=Mus musculus GN=Slc30a4 PE=2 SV=1;tr|A2AK40|A2AK40_MOUSE Zinc transporter 4 OS=Mus musculus GN=Slc30a4 PE=4 SV=1;tr|Q148S1|Q148S1_MOUSE Solute carrier family 30 (Zinc transporter), member 4 OS=Mus	80209000	22686000	58852000	13479000	6684100	1890500	4904300	73348000	30675000	0	4	4	4	18.1	18.1	18.1	42.392	0	11.943	161750000	3	2	1	2	2	1	2	2	1	2	1	1	1
200	A2AKB9-2;A2AKB9;Z4YN28;A2AKB9-4;A2AKB9-3	A2AKB9-2;A2AKB9;Z4YN28;A2AKB9-4;A2AKB9-3	DDB1- and CUL4-associated factor 10	Dcaf10	sp|A2AKB9-2|DCA10_MOUSE Isoform 2 of DDB1- and CUL4-associated factor 10 OS=Mus musculus GN=Dcaf10;sp|A2AKB9|DCA10_MOUSE DDB1- and CUL4-associated factor 10 OS=Mus musculus GN=Dcaf10 PE=2 SV=1;tr|Z4YN28|Z4YN28_MOUSE DDB1- and CUL4-associated factor 10 (Fra	28281000	47990000	0	2311200	856990	1454200	0	51629000	26215000	0	4	4	4	10.6	10.6	10.6	57.614	0	8.4161	76271000	5	2	3	0	2	3	0	2	3	0	2	3	0
201	A2AKD6;Q9JJW0	A2AKD6;Q9JJW0	Peroxisomal membrane protein 4	Pxmp4	tr|A2AKD6|A2AKD6_MOUSE Peroxisomal membrane protein 4 OS=Mus musculus GN=Pxmp4 PE=4 SV=1;sp|Q9JJW0|PXMP4_MOUSE Peroxisomal membrane protein 4 OS=Mus musculus GN=Pxmp4 PE=2 SV=3	61120000	65801000	31251000	22596000	8731400	9400100	4464500	45697000	62641000	34103000	2	2	2	26.1	26.1	26.1	10.365	0.00014921	4.375	158170000	7	1	1	2	1	1	2	1	1	2	3	2	2
202	Q3UVD6;A2AKD7;Q61234	Q3UVD6;A2AKD7;Q61234	Alpha-1-syntrophin	Snta1	tr|Q3UVD6|Q3UVD6_MOUSE Putative uncharacterized protein OS=Mus musculus GN=Snta1 PE=2 SV=1;tr|A2AKD7|A2AKD7_MOUSE Alpha-1-syntrophin OS=Mus musculus GN=Snta1 PE=1 SV=1;sp|Q61234|SNTA1_MOUSE Alpha-1-syntrophin OS=Mus musculus GN=Snta1 PE=1 SV=1	185480000	16898000	189690000	15079000	7133900	649930	7295700	175230000	25426000	216760000	6	5	5	15.4	14	14	53.312	0	24.115	392070000	10	4	2	5	3	1	4	3	1	4	4	1	5
203	A2AKG8;E9PYJ6;A2AKG8-3;A2AKG8-2;REV__Q3UV16	A2AKG8;E9PYJ6	Focadhesin	Focad	sp|A2AKG8|FOCAD_MOUSE Focadhesin OS=Mus musculus GN=Focad PE=2 SV=1;tr|E9PYJ6|E9PYJ6_MOUSE Focadhesin OS=Mus musculus GN=Focad PE=4 SV=1	1434800000	1386800000	898200000	42271000	16304000	15760000	10207000	1324800000	1324600000	1167200000	24	24	12	17.6	17.6	8.8	198.95	0	83.886	3719800000	80	20	20	18	20	20	18	9	10	9	26	26	28
204	A2AKH4;Q9D3L3;O09044;B0R030;B0R029;E9Q8A1	A2AKH4;Q9D3L3;O09044;B0R030;B0R029;E9Q8A1	Synaptosomal-associated protein;Synaptosomal-associated protein 23	Snap23	tr|A2AKH4|A2AKH4_MOUSE Synaptosomal-associated protein OS=Mus musculus GN=Snap23 PE=2 SV=1;tr|Q9D3L3|Q9D3L3_MOUSE Synaptosomal-associated protein OS=Mus musculus GN=Snap23 PE=1 SV=1;sp|O09044|SNP23_MOUSE Synaptosomal-associated protein 23 OS=Mus musculus G	623930000	964090000	537200000	151800000	44566000	68864000	38372000	680730000	808600000	645120000	11	11	10	71.9	71.9	67.1	23.261	0	45.328	2125200000	24	7	10	8	7	10	8	6	9	8	7	9	8
205	A2AKH7;Q8JZX5;Q9CSK4;Q9D1G5;Q9CTX7;B0R031	A2AKH7;Q8JZX5;Q9CSK4;Q9D1G5;Q9CTX7	Leucine-rich repeat-containing protein 57	Lrrc57	tr|A2AKH7|A2AKH7_MOUSE Leucine-rich repeat-containing protein 57 (Fragment) OS=Mus musculus GN=Lrrc57 PE=4 SV=2;tr|Q8JZX5|Q8JZX5_MOUSE Leucine rich repeat containing 57 OS=Mus musculus GN=Lrrc57 PE=2 SV=1;tr|Q9CSK4|Q9CSK4_MOUSE Putative uncharacterized pro	75247000	184200000	192860000	30154000	5016500	12280000	12857000	95861000	181600000	206560000	5	5	5	32.6	32.6	32.6	24.132	0	6.9359	452310000	10	2	4	4	2	4	4	2	4	4	2	4	4
206	A2AKU9;A2AKV2;A2AKV3;A2AKV1;A2AKV0	A2AKU9;A2AKV2;A2AKV3;A2AKV1	ATP synthase subunit gamma	Atp5c1	tr|A2AKU9|A2AKU9_MOUSE ATP synthase subunit gamma OS=Mus musculus GN=Atp5c1 PE=1 SV=1;tr|A2AKV2|A2AKV2_MOUSE ATP synthase subunit gamma, mitochondrial (Fragment) OS=Mus musculus GN=Atp5c1 PE=1 SV=1;tr|A2AKV3|A2AKV3_MOUSE ATP synthase subunit gamma, mitocho	108360000	292510000	65811000	29168000	6772700	18282000	4113200	176750000	112280000	181400000	13	1	1	46.1	4	4	32.77	0.00056802	3.3143	466690000	5	13	9	10	1	1	1	1	1	1	1	2	2
207	A2AKX3;A2AKX3-2	A2AKX3;A2AKX3-2	Probable helicase senataxin	Setx	sp|A2AKX3|SETX_MOUSE Probable helicase senataxin OS=Mus musculus GN=Setx PE=1 SV=1;sp|A2AKX3-2|SETX_MOUSE Isoform 2 of Probable helicase senataxin OS=Mus musculus GN=Setx	90528000	51017000	91391000	1493200	580310	327030	585840	67838000	77756000	88209000	10	10	10	6.5	6.5	6.5	297.59	0	12.083	232940000	14	7	3	5	7	3	5	7	3	5	6	3	5
208	Q6P6I7;A2AL12;Q5FB19;Q3UZG3;Q8BG05	Q6P6I7;A2AL12;Q5FB19;Q3UZG3;Q8BG05	Heterogeneous nuclear ribonucleoprotein A3	Hnrnpa3	tr|Q6P6I7|Q6P6I7_MOUSE Hnrpa3 protein OS=Mus musculus GN=Hnrnpa3 PE=2 SV=1;tr|A2AL12|A2AL12_MOUSE Heterogeneous nuclear ribonucleoprotein A3 OS=Mus musculus GN=Hnrnpa3 PE=4 SV=1;tr|Q5FB19|Q5FB19_MOUSE Heterogeneous nuclear ribonucleoprotein A3 OS=Mus muscu	71906000000	69883000000	67787000000	12328000000	4229800000	4110700000	3987500000	63044000000	59954000000	66989000000	25	25	5	61.3	61.3	10.1	34.376	0	248.88	209580000000	676	25	23	23	25	23	23	5	5	4	246	217	213
209	R4GML6;B2RXX1;A2AL36-2;A2AL36	R4GML6;B2RXX1;A2AL36-2;A2AL36	Centriolin	Cntrl	tr|R4GML6|R4GML6_MOUSE Centriolin (Fragment) OS=Mus musculus GN=Cntrl PE=4 SV=1;tr|B2RXX1|B2RXX1_MOUSE Cep110 protein OS=Mus musculus GN=Cntrl PE=2 SV=1;sp|A2AL36-2|CNTRL_MOUSE Isoform 2 of Centriolin OS=Mus musculus GN=Cntrl;sp|A2AL36|CNTRL_MOUSE Centriol	0	0	0	0	0	0	0	0	0	0	1	1	1	0.6	0.6	0.6	266.76	1	-2	0	0	0	1	1	0	1	1	0	1	1	0	0	0
210	A2AL50;Q8C0I1;H3BKN2;A2AL49;Q8BKC4;Q3TNW8;H3BIY5;H3BJ14;D3Z623	A2AL50;Q8C0I1;H3BKN2;A2AL49;Q8BKC4	Alkyldihydroxyacetonephosphate synthase, peroxisomal	Agps	tr|A2AL50|A2AL50_MOUSE Alkyldihydroxyacetonephosphate synthase, peroxisomal OS=Mus musculus GN=Agps PE=1 SV=1;sp|Q8C0I1|ADAS_MOUSE Alkyldihydroxyacetonephosphate synthase, peroxisomal OS=Mus musculus GN=Agps PE=1 SV=1;tr|H3BKN2|H3BKN2_MOUSE Alkyldihydroxya	5047700000	4767000000	4499200000	349120000	123120000	116270000	109740000	5019700000	4799300000	4965300000	23	23	23	47.2	47.2	47.2	74.342	0	126.06	14314000000	88	18	21	17	18	21	17	18	21	17	34	30	24
211	Q9EQ66;A2AL85;Q8BSY0;Q8CBM2;Q8BQK0;A2AL83;A2AL79;Q6P8S1;Q8CH79;A2AL78;Q9EQ67;Q91WG6;Q3TU40;Q9EQ65;A2AL81;A2AL71;Q9EQ63;Q9EQ62;A2AL77;Q9CR06;Q9D7J8;Q920F7;A2AL74;Q920F8;A2AL76;Q920F9;A2AL75;Q9EQ64	Q9EQ66;A2AL85;Q8BSY0;Q8CBM2;Q8BQK0	Aspartyl/asparaginyl beta-hydroxylase	ASPH;Asph	tr|Q9EQ66|Q9EQ66_MOUSE Aspartly beta-hydroxylase OS=Mus musculus GN=ASPH PE=4 SV=1;tr|A2AL85|A2AL85_MOUSE Aspartyl/asparaginyl beta-hydroxylase OS=Mus musculus GN=Asph PE=4 SV=1;sp|Q8BSY0|ASPH_MOUSE Aspartyl/asparaginyl beta-hydroxylase OS=Mus musculus GN=	1123800000	1259400000	1282200000	104730000	32108000	35984000	36634000	1259900000	1248400000	1262400000	21	21	21	37.7	37.7	37.7	77.319	0	76.886	3665400000	65	10	18	19	10	18	19	10	18	19	17	21	27
212	A2ALA4;Q62276-2;Q62276	A2ALA4;Q62276-2;Q62276	Mediator of RNA polymerase II transcription subunit 22	Med22	tr|A2ALA4|A2ALA4_MOUSE Mediator of RNA polymerase II transcription subunit 22 (Fragment) OS=Mus musculus GN=Med22 PE=4 SV=1;sp|Q62276-2|MED22_MOUSE Isoform 2 of Mediator of RNA polymerase II transcription subunit 22 OS=Mus musculus GN=Med22;sp|Q62276|MED22	419420000	0	72321000	44704000	38129000	0	6574600	360750000	0	158040000	3	3	3	22.6	22.6	22.6	19.562	0	12.043	491740000	4	3	0	1	3	0	1	3	0	1	3	0	1
213	V9GXE6;I6L9E0;Q3U3J6;A2ALA6;P09925	V9GXE6;I6L9E0;Q3U3J6;A2ALA6;P09925	Surfeit locus protein 1	Surf1	tr|V9GXE6|V9GXE6_MOUSE Surfeit locus protein 1 (Fragment) OS=Mus musculus GN=Surf1 PE=4 SV=1;tr|I6L9E0|I6L9E0_MOUSE Surf1 protein OS=Mus musculus GN=Surf1 PE=2 SV=1;tr|Q3U3J6|Q3U3J6_MOUSE Putative uncharacterized protein OS=Mus musculus GN=Surf1 PE=2 SV=1;	364210000	289560000	188040000	46767000	20234000	16087000	10447000	291910000	246640000	289180000	8	8	8	37.5	37.5	37.5	28.247	0	19.067	841810000	13	5	4	4	5	4	4	5	4	4	6	3	4
214	A2ALB2;Q6PAQ4;A2ALB1	A2ALB2;Q6PAQ4;A2ALB1	RNA exonuclease 4	Rexo4	tr|A2ALB2|A2ALB2_MOUSE RNA exonuclease 4 OS=Mus musculus GN=Rexo4 PE=4 SV=1;sp|Q6PAQ4|REXO4_MOUSE RNA exonuclease 4 OS=Mus musculus GN=Rexo4 PE=2 SV=2;tr|A2ALB1|A2ALB1_MOUSE RNA exonuclease 4 (Fragment) OS=Mus musculus GN=Rexo4 PE=4 SV=1	544600000	221160000	448520000	48571000	21784000	8846300	17941000	352210000	360530000	546310000	14	14	14	39.6	39.6	39.6	45.465	0	19.983	1214300000	32	12	8	8	12	8	8	12	8	8	14	9	9
215	A2ALF2;Q6NZB0;A2ALF0;F6TQL3;A2ALF3;F6QIL6;F7CXJ2;D3Z4I5;E9PZT4	A2ALF2;Q6NZB0;A2ALF0;F6TQL3;A2ALF3	DnaJ homolog subfamily C member 8	Dnajc8	tr|A2ALF2|A2ALF2_MOUSE DnaJ (Hsp40) homolog, subfamily C, member 8 OS=Mus musculus GN=Dnajc8 PE=2 SV=1;sp|Q6NZB0|DNJC8_MOUSE DnaJ homolog subfamily C member 8 OS=Mus musculus GN=Dnajc8 PE=2 SV=2;tr|A2ALF0|A2ALF0_MOUSE DnaJ homolog subfamily C member 8 OS=M	4009500000	4523200000	3615700000	867750000	286400000	323090000	258270000	4780100000	3539200000	3988600000	13	13	13	55.3	55.3	55.3	29.812	0	148.8	12148000000	60	11	12	11	11	12	11	11	12	11	19	20	21
216	Q3TMR3;A2ALK6;Q9JMC8	Q3TMR3;A2ALK6;Q9JMC8	Band 4.1-like protein 4B	Epb4.1l4b;Epb41l4b	tr|Q3TMR3|Q3TMR3_MOUSE Putative uncharacterized protein (Fragment) OS=Mus musculus GN=Epb4.1l4b PE=2 SV=1;tr|A2ALK6|A2ALK6_MOUSE Band 4.1-like protein 4B OS=Mus musculus GN=Epb4.1l4b PE=4 SV=1;sp|Q9JMC8|E41LB_MOUSE Band 4.1-like protein 4B OS=Mus musculus	18417000	0	0	767400	767400	0	0	21725000	0	0	3	2	2	6.9	5.3	5.3	59.09	0.00097998	3.0009	18417000	2	3	1	1	2	0	0	2	0	0	2	0	0
217	Q8C048;A2ALL9;Q0VF55;Q0VF54	Q8C048;A2ALL9;Q0VF55;Q0VF54	Calcium-transporting ATPase	Atp2b3	tr|Q8C048|Q8C048_MOUSE Calcium-transporting ATPase OS=Mus musculus GN=Atp2b3 PE=2 SV=1;tr|A2ALL9|A2ALL9_MOUSE Calcium-transporting ATPase OS=Mus musculus GN=Atp2b3 PE=1 SV=1;tr|Q0VF55|Q0VF55_MOUSE Calcium-transporting ATPase OS=Mus musculus GN=Atp2b3 PE=2	273720000	95651000	136910000	9040800	4887900	1708100	2444800	113860000	121370000	246540000	10	1	1	9.7	0.7	0.7	125.71	1	-2	506280000	4	9	8	8	1	1	1	1	1	1	2	1	1
218	E9Q151;A2ALM6;Q8VBW1-3;Q8VBW1-2;Q8VBW1;F6UKB4;E9Q6T2	E9Q151;A2ALM6;Q8VBW1-3;Q8VBW1-2;Q8VBW1	Transporter;Sodium- and chloride-dependent creatine transporter 1	Slc6a8	tr|E9Q151|E9Q151_MOUSE Transporter OS=Mus musculus GN=Slc6a8 PE=3 SV=1;tr|A2ALM6|A2ALM6_MOUSE Transporter OS=Mus musculus GN=Slc6a8 PE=2 SV=1;sp|Q8VBW1-3|SC6A8_MOUSE Isoform 3 of Sodium- and chloride-dependent creatine transporter 1 OS=Mus musculus GN=Slc6	379710000	132610000	16090000	24019000	17259000	6027900	731350	309960000	193250000	0	5	4	4	7.1	6	6	69.96	0	8.0607	528410000	5	4	2	2	3	1	1	3	1	1	3	1	1
219	A2ALP5;Q3UG32;P52734;Q99K79	A2ALP5;Q3UG32;P52734;Q99K79	FYVE, RhoGEF and PH domain-containing protein 1	Fgd1	tr|A2ALP5|A2ALP5_MOUSE FYVE, RhoGEF and PH domain-containing protein 1 OS=Mus musculus GN=Fgd1 PE=4 SV=1;tr|Q3UG32|Q3UG32_MOUSE Putative uncharacterized protein OS=Mus musculus GN=Fgd1 PE=2 SV=1;sp|P52734|FGD1_MOUSE FYVE, RhoGEF and PH domain-containing pr	304100000	0	405980000	15108000	6470200	0	8637900	269920000	0	429930000	3	2	2	4.2	3.4	3.4	89.005	0.0052288	1.7965	710080000	3	3	1	2	2	0	1	2	0	1	2	0	1
220	A2ALR9;Q3V0C5;Q3V0C5-5;Q3V0C5-2;A2ALR8;Q3V0C5-4;Q3V0C5-3;B7ZNK5;F6VSP0;A2ALR5;F6TH61;F7ALR2;A2BDP2;F6TGT8;F6VSQ9;F6Z2T3;A2ALS8;A2ALS9	A2ALR9;Q3V0C5;Q3V0C5-5;Q3V0C5-2;A2ALR8;Q3V0C5-4;Q3V0C5-3	Ubiquitin carboxyl-terminal hydrolase 48	Usp48	tr|A2ALR9|A2ALR9_MOUSE Ubiquitin carboxyl-terminal hydrolase 48 OS=Mus musculus GN=Usp48 PE=4 SV=1;sp|Q3V0C5|UBP48_MOUSE Ubiquitin carboxyl-terminal hydrolase 48 OS=Mus musculus GN=Usp48 PE=2 SV=2;sp|Q3V0C5-5|UBP48_MOUSE Isoform 5 of Ubiquitin carboxyl-ter	1298200000	2134600000	936470000	71627000	21282000	34993000	15352000	1772600000	1385600000	1385400000	22	22	22	28.4	28.4	28.4	118.77	0	57.427	4369300000	50	12	16	16	12	16	16	12	16	16	16	16	18
221	A2ALS4;A2ALS5;A2ALS5-4;A2ALS5-3;A2ALS5-2;A2ALS7	A2ALS4;A2ALS5;A2ALS5-4;A2ALS5-3;A2ALS5-2;A2ALS7	Rap1 GTPase-activating protein 1	Rap1gap	tr|A2ALS4|A2ALS4_MOUSE Rap1 GTPase-activating protein 1 OS=Mus musculus GN=Rap1gap PE=4 SV=1;sp|A2ALS5|RPGP1_MOUSE Rap1 GTPase-activating protein 1 OS=Mus musculus GN=Rap1gap PE=1 SV=2;sp|A2ALS5-4|RPGP1_MOUSE Isoform 4 of Rap1 GTPase-activating protein 1 O	14137000	38496000	27771000	2173100	382080	1040400	750580	16825000	0	32112000	3	3	3	7.1	7.1	7.1	81.251	0.0001491	4.3606	80404000	4	1	2	1	1	2	1	1	2	1	1	2	1
222	A7TU71;A2ALU4;A2ALU4-2;Q8C7N5	A7TU71;A2ALU4;A2ALU4-2	Protein Shroom2	Shroom2	tr|A7TU71|A7TU71_MOUSE Protein Shroom2 OS=Mus musculus GN=Shroom2 PE=1 SV=1;sp|A2ALU4|SHRM2_MOUSE Protein Shroom2 OS=Mus musculus GN=Shroom2 PE=1 SV=1;sp|A2ALU4-2|SHRM2_MOUSE Isoform 2 of Protein Shroom2 OS=Mus musculus GN=Shroom2	1114700000	1487300000	1185400000	37875000	11147000	14873000	11854000	1169300000	1379000000	1356700000	20	20	18	19.1	19.1	18.6	165.26	0	112.41	3787500000	55	13	16	14	13	16	14	12	14	13	18	20	17
223	A2ALV5	A2ALV5		AI481877	tr|A2ALV5|A2ALV5_MOUSE Protein AI481877 OS=Mus musculus GN=AI481877 PE=4 SV=1	0	105720000	0	1149100	0	1149100	0	0	101420000	0	1	1	1	0.9	0.9	0.9	168.06	1	-2	105720000	1	0	1	0	0	1	0	0	1	0	0	1	0
224	A2ALV7;A2ALV6;A2ALV8;Q8C2Z1;A2ALW1;Q8C9Q5;A2ALV9	A2ALV7;A2ALV6		AI314180	tr|A2ALV7|A2ALV7_MOUSE Protein AI314180 (Fragment) OS=Mus musculus GN=AI314180 PE=4 SV=1;tr|A2ALV6|A2ALV6_MOUSE Protein AI314180 OS=Mus musculus GN=AI314180 PE=4 SV=1	0	0	23693000	260370	0	0	260370	0	0	33619000	59	1	1	56.8	1.1	1.1	164.52	1	-2	23693000	1	49	48	47	0	0	1	0	0	1	0	0	1
225	A2ALW5;A2ALW5-2;Z4YLX5	A2ALW5;A2ALW5-2	DnaJ homolog subfamily C member 25	Dnajc25	sp|A2ALW5|DJC25_MOUSE DnaJ homolog subfamily C member 25 OS=Mus musculus GN=Dnajc25 PE=2 SV=1;sp|A2ALW5-2|DJC25_MOUSE Isoform 2 of DnaJ homolog subfamily C member 25 OS=Mus musculus GN=Dnajc25	66718000	71655000	81175000	10977000	3335900	3582800	4058800	63132000	63855000	142940000	3	2	2	7.8	5	5	41.937	0.0026874	2.2566	219550000	7	1	3	1	1	2	1	1	2	1	3	3	1
226	A2AM29;Q3ULL0;E9Q3B8;Q3UIA3	A2AM29	Protein AF-9	Mllt3	sp|A2AM29|AF9_MOUSE Protein AF-9 OS=Mus musculus GN=Mllt3 PE=1 SV=1	159870000	69107000	75440000	13235000	6950800	3004600	3280000	94265000	101220000	104170000	5	5	5	12.7	12.7	12.7	63.375	0	12.509	304420000	10	2	3	4	2	3	4	2	3	4	3	3	4
227	A2AMH5;A2AMH4;Q6X893;Q6X893-2;A2AMH3;A2AMH8	A2AMH5;A2AMH4;Q6X893;Q6X893-2;A2AMH3	Choline transporter-like protein 1	Slc44a1	tr|A2AMH5|A2AMH5_MOUSE Choline transporter-like protein 1 OS=Mus musculus GN=Slc44a1 PE=4 SV=1;tr|A2AMH4|A2AMH4_MOUSE Choline transporter-like protein 1 OS=Mus musculus GN=Slc44a1 PE=4 SV=1;sp|Q6X893|CTL1_MOUSE Choline transporter-like protein 1 OS=Mus mus	991030000	872780000	950250000	87939000	30970000	27274000	29695000	1138500000	770460000	961760000	12	12	12	23	23	23	73.044	0	63.229	2814000000	28	9	9	7	9	9	7	9	9	7	8	9	11
228	A2AMI2;Q80XI3;Q80XI3-3;Q6DI78;A2AMI4;Q8BQR8	A2AMI2;Q80XI3;Q80XI3-3;Q6DI78	Eukaryotic translation initiation factor 4 gamma 3	Eif4g3	tr|A2AMI2|A2AMI2_MOUSE Eukaryotic translation initiation factor 4 gamma 3 OS=Mus musculus GN=Eif4g3 PE=1 SV=1;sp|Q80XI3|IF4G3_MOUSE Eukaryotic translation initiation factor 4 gamma 3 OS=Mus musculus GN=Eif4g3 PE=1 SV=2;sp|Q80XI3-3|IF4G3_MOUSE Isoform 3 of	0	0	25316000	243430	0	0	243430	0	0	31715000	38	1	1	35.2	1.5	1.5	174.82	0.0092605	1.5771	25316000	2	25	25	29	0	1	1	0	1	1	0	1	1
229	A2AMM0	A2AMM0	Muscle-related coiled-coil protein	Murc	sp|A2AMM0|MURC_MOUSE Muscle-related coiled-coil protein OS=Mus musculus GN=Murc PE=2 SV=1	175380000	203220000	291380000	41874000	10961000	12701000	18211000	220640000	254190000	229860000	4	4	4	15.7	15.7	15.7	41.008	0	14.488	669980000	13	2	3	3	2	3	3	2	3	3	3	3	7
230	Q3TQJ2;A2AMS2;A2AMS3;Q03249	Q3TQJ2;A2AMS2;A2AMS3;Q03249	Galactose-1-phosphate uridylyltransferase	Galt	tr|Q3TQJ2|Q3TQJ2_MOUSE Putative uncharacterized protein OS=Mus musculus GN=Galt PE=2 SV=1;tr|A2AMS2|A2AMS2_MOUSE Galactose-1-phosphate uridylyltransferase OS=Mus musculus GN=Galt PE=3 SV=1;tr|A2AMS3|A2AMS3_MOUSE Galactose-1-phosphate uridylyltransferase OS	8633400	0	0	719450	719450	0	0	10431000	0	0	1	1	1	6.4	6.4	6.4	23.578	0.0092462	1.5501	8633400	1	1	0	0	1	0	0	1	0	0	1	0	0
231	A2AMU9;Q9D0I8;A2AMV1;Q9QYY3;D6RCI7	A2AMU9;Q9D0I8;A2AMV1;Q9QYY3	mRNA turnover protein 4 homolog	Mrto4;mg684	tr|A2AMU9|A2AMU9_MOUSE Mrto4 protein OS=Mus musculus GN=Mrto4 PE=2 SV=1;sp|Q9D0I8|MRT4_MOUSE mRNA turnover protein 4 homolog OS=Mus musculus GN=Mrto4 PE=2 SV=1;tr|A2AMV1|A2AMV1_MOUSE RIKEN cDNA 2610012O22, isoform CRA_a OS=Mus musculus GN=Mrto4 PE=3 SV=1;t	4685000000	4714400000	4919500000	842290000	275590000	277320000	289380000	4948900000	5166500000	4619800000	15	15	15	57.3	57.3	57.3	27.545	0	83.085	14319000000	70	13	13	13	13	13	13	13	13	13	21	23	26
232	A2AMY5;Q91VX2;F6PYV5;A2AMY7;F6WTC8	A2AMY5;Q91VX2	Ubiquitin-associated protein 2	Ubap2	tr|A2AMY5|A2AMY5_MOUSE Ubiquitin-associated protein 2 OS=Mus musculus GN=Ubap2 PE=1 SV=1;sp|Q91VX2|UBAP2_MOUSE Ubiquitin-associated protein 2 OS=Mus musculus GN=Ubap2 PE=1 SV=1	3070500000	3145000000	1468100000	232840000	93045000	95303000	44487000	2496400000	2491900000	2352900000	23	23	23	37	37	37	117.83	0	95.437	7683600000	53	16	18	16	16	18	16	16	18	16	18	18	17
233	A2AMZ4	A2AMZ4	Uncharacterized protein C17orf89 homolog		sp|A2AMZ4|CQ089_MOUSE Uncharacterized protein C17orf89 homolog OS=Mus musculus PE=4 SV=1	213730000	188420000	88550000	81784000	35622000	31404000	14758000	160050000	160460000	157990000	3	3	3	47.3	47.3	47.3	7.7849	0	10.319	490710000	10	3	2	2	3	2	2	3	2	2	5	3	2
234	A2AN08-3;A2AN08;A2AN08-5;A2AN08-2;Z4YMA7;F6SSP6;A2VCS3;A2AN08-4;Z4YLP1	A2AN08-3;A2AN08;A2AN08-5	E3 ubiquitin-protein ligase UBR4	Ubr4	sp|A2AN08-3|UBR4_MOUSE Isoform 3 of E3 ubiquitin-protein ligase UBR4 OS=Mus musculus GN=Ubr4;sp|A2AN08|UBR4_MOUSE E3 ubiquitin-protein ligase UBR4 OS=Mus musculus GN=Ubr4 PE=1 SV=1;sp|A2AN08-5|UBR4_MOUSE Isoform 5 of E3 ubiquitin-protein ligase UBR4 OS=Mus	14348000000	13776000000	13158000000	156370000	54347000	52183000	49839000	13698000000	13682000000	14625000000	142	142	142	42.6	42.6	42.6	570.29	0	323.31	41282000000	484	117	116	110	117	116	110	117	116	110	160	157	167
235	Q70KX6;Q3UUV0;Q3TMV1;Q3TXU6;A2AN61;Q8VEH2;Q6GQU3;F6XWQ4;Q8BIT2;F7D5G9;F6S5B6;Q9CUW6;F7AT58;F6Q3Z1;F7BM53	Q70KX6;Q3UUV0;Q3TMV1;Q3TXU6;A2AN61;Q8VEH2;Q6GQU3;F6XWQ4;Q8BIT2		Ciz1	tr|Q70KX6|Q70KX6_MOUSE Cip1-interacting zinc-finger protein OS=Mus musculus GN=Ciz1 PE=2 SV=1;tr|Q3UUV0|Q3UUV0_MOUSE Protein Ciz1 OS=Mus musculus GN=Ciz1 PE=2 SV=1;tr|Q3TMV1|Q3TMV1_MOUSE Putative uncharacterized protein OS=Mus musculus GN=Ciz1 PE=2 SV=1;tr	192070000	380170000	261900000	27805000	6402300	12672000	8730000	273700000	303490000	349800000	9	9	9	18.8	18.8	18.8	78.019	0	22.155	834140000	28	5	8	6	5	8	6	5	8	6	7	11	10
236	Q80YU9;A2AN96;O88851	Q80YU9;A2AN96;O88851	Putative hydrolase RBBP9	Rbbp9	tr|Q80YU9|Q80YU9_MOUSE Retinoblastoma binding protein 9 OS=Mus musculus GN=Rbbp9 PE=2 SV=1;tr|A2AN96|A2AN96_MOUSE Retinoblastoma binding protein 9 OS=Mus musculus GN=Rbbp9 PE=2 SV=1;sp|O88851|RBBP9_MOUSE Putative hydrolase RBBP9 OS=Mus musculus GN=Rbbp9 PE	1013400000	1105800000	653660000	231070000	84448000	92146000	54472000	979180000	1324000000	734040000	7	7	7	47.3	47.3	47.3	20.912	0	25.238	2772800000	18	6	6	5	6	6	5	6	6	5	8	6	4
237	A2ANP1;B7ZWP1;Q9D772	A2ANP1;B7ZWP1;Q9D772	Protein FAM219A	Fam219a	tr|A2ANP1|A2ANP1_MOUSE 2310028H24Rik protein OS=Mus musculus GN=Fam219a PE=2 SV=1;tr|B7ZWP1|B7ZWP1_MOUSE 2310028H24Rik protein OS=Mus musculus GN=Fam219a PE=2 SV=1;sp|Q9D772|F219A_MOUSE Protein FAM219A OS=Mus musculus GN=Fam219a PE=2 SV=2	60246000	35344000	13267000	10886000	6024600	3534400	1326700	47831000	37611000	28269000	2	2	2	29.8	29.8	29.8	18.655	0.0020344	2.4228	108860000	4	2	1	1	2	1	1	2	1	1	2	1	1
238	A2ANU2;Q60GT3;Q8BGT9	A2ANU2;Q60GT3;Q8BGT9	Polypeptide N-acetylgalactosaminyltransferase;Polypeptide N-acetylgalactosaminyltransferase 12	Galnt12	tr|A2ANU2|A2ANU2_MOUSE Polypeptide N-acetylgalactosaminyltransferase 12 OS=Mus musculus GN=Galnt12 PE=4 SV=1;tr|Q60GT3|Q60GT3_MOUSE UDP-N-acetyl-alpha-D-galactosamine:polypeptide N-acetylgalactosaminyltransferase OS=Mus musculus GN=Galnt12 PE=2 SV=1;sp|Q8B	46446000	46032000	99850000	11313000	2732100	2707800	5873500	62839000	59749000	75387000	3	2	2	15.1	10.6	10.6	33.163	0.0015139	2.6429	192330000	4	2	1	2	1	1	2	1	1	2	1	1	2
239	J3QMC5;A2ANY6;Q3TPE2;Q5U481;Q6R5G2;Q8CAR9;Q6IQZ8;Q497I1	J3QMC5;A2ANY6		Mdn1	tr|J3QMC5|J3QMC5_MOUSE Midasin OS=Mus musculus GN=Mdn1 PE=1 SV=1;tr|A2ANY6|A2ANY6_MOUSE Midasin OS=Mus musculus GN=Mdn1 PE=1 SV=1	2477200000	1841100000	2223500000	20702000	7839300	5826100	7036400	2478800000	2147900000	2530300000	74	74	73	19.2	19.2	19.1	629.58	0	204.83	6541800000	156	50	48	46	50	48	46	49	47	46	54	49	53
240	A2ANY8;Q69ZU8-2;Q69ZU8	A2ANY8;Q69ZU8-2;Q69ZU8	Ankyrin repeat domain-containing protein 6	Ankrd6	tr|A2ANY8|A2ANY8_MOUSE Ankyrin repeat domain-containing protein 6 OS=Mus musculus GN=Ankrd6 PE=4 SV=1;sp|Q69ZU8-2|ANKR6_MOUSE Isoform 2 of Ankyrin repeat domain-containing protein 6 OS=Mus musculus GN=Ankrd6;sp|Q69ZU8|ANKR6_MOUSE Ankyrin repeat domain-cont	0	8413400	0	191210	0	191210	0	0	7951700	0	1	1	1	2	2	2	71.198	0.0097436	1.529	8413400	0	0	1	0	0	1	0	0	1	0	0	0	0
241	Q8K3B2;A2ANZ2;Q3U3D8;Q3TJP2;Q6DFW0	Q8K3B2;A2ANZ2;Q3U3D8;Q3TJP2;Q6DFW0	Protein C9orf72 homolog	3110043O21Rik	tr|Q8K3B2|Q8K3B2_MOUSE Uncharacterized protein OS=Mus musculus GN=3110043O21Rik PE=2 SV=1;tr|A2ANZ2|A2ANZ2_MOUSE MCG141727, isoform CRA_b OS=Mus musculus GN=3110043O21Rik PE=4 SV=1;tr|Q3U3D8|Q3U3D8_MOUSE MCG141727, isoform CRA_a OS=Mus musculus GN=3110043O	26681000	53260000	28202000	6361300	1569400	3132900	1659000	28613000	53507000	50382000	3	3	3	10.7	10.7	10.7	35.86	0.00015404	5.1425	108140000	5	1	2	2	1	2	2	1	2	2	1	2	2
242	A2AP32;A2AP31;Q3UIU2	A2AP32;A2AP31;Q3UIU2	NADH dehydrogenase [ubiquinone] 1 beta subcomplex subunit 6	Ndufb6	tr|A2AP32|A2AP32_MOUSE NADH dehydrogenase [ubiquinone] 1 beta subcomplex subunit 6 OS=Mus musculus GN=Ndufb6 PE=1 SV=1;tr|A2AP31|A2AP31_MOUSE MCG9810 OS=Mus musculus GN=Ndufb6 PE=2 SV=1;sp|Q3UIU2|NDUB6_MOUSE NADH dehydrogenase [ubiquinone] 1 beta subcomple	281630000	309310000	154550000	82831000	31292000	34367000	17172000	268860000	333070000	231220000	5	5	5	49.5	49.5	49.5	11.741	0	13.195	745480000	10	5	2	3	5	2	3	5	2	3	4	3	3
243	I7HJQ8;A2AP74;Q8BIF0-2;Q8BIF0	I7HJQ8;A2AP74;Q8BIF0-2;Q8BIF0	CD99 antigen-like protein 2	Cd99l2	tr|I7HJQ8|I7HJQ8_MOUSE CD99 antigen-like protein 2 OS=Mus musculus GN=Cd99l2 PE=4 SV=1;tr|A2AP74|A2AP74_MOUSE CD99 antigen-like protein 2 OS=Mus musculus GN=Cd99l2 PE=4 SV=1;sp|Q8BIF0-2|C99L2_MOUSE Isoform 2 of CD99 antigen-like protein 2 OS=Mus musculus G	74598000	155680000	145710000	37598000	7459800	15568000	14571000	115880000	128740000	136010000	2	2	2	17.9	17.9	17.9	20.092	0	9.707	375980000	5	1	2	2	1	2	2	1	2	2	1	2	2
244	A2AP78;Q544R9;G5E920;O54879	A2AP78;Q544R9;G5E920;O54879	High mobility group protein B3	Hmgb3	tr|A2AP78|A2AP78_MOUSE High mobility group protein B3 (Fragment) OS=Mus musculus GN=Hmgb3 PE=4 SV=1;tr|Q544R9|Q544R9_MOUSE High mobility group box 3 OS=Mus musculus GN=Hmgb3 PE=2 SV=1;tr|G5E920|G5E920_MOUSE MCG114640 OS=Mus musculus GN=Gm6104 PE=4 SV=1;sp|	3428400000	2459200000	2630300000	946430000	380940000	273240000	292260000	3338300000	2687800000	2743000000	7	7	7	31.4	31.4	31.4	18.311	0	19.836	8517900000	31	6	7	5	6	7	5	6	7	5	11	10	10
245	A2APB8;Q9CT36;Q8BTJ3	A2APB8;Q9CT36;Q8BTJ3	Targeting protein for Xklp2	Tpx2	sp|A2APB8|TPX2_MOUSE Targeting protein for Xklp2 OS=Mus musculus GN=Tpx2 PE=1 SV=1;tr|Q9CT36|Q9CT36_MOUSE Putative uncharacterized protein (Fragment) OS=Mus musculus GN=Tpx2 PE=2 SV=1;tr|Q8BTJ3|Q8BTJ3_MOUSE Putative uncharacterized protein OS=Mus musculus	5769900000	5817200000	4811200000	364410000	128220000	129270000	106920000	5653900000	6036700000	5649600000	38	38	38	50.7	50.7	50.7	85.893	0	181.14	16398000000	131	31	31	34	31	31	34	31	31	34	44	40	47
246	A2API1;Q544H6;Q9Z238;Q9CSV7;Q7TMS8;A0JLN2;B2RS11;Q61457	A2API1;Q544H6;Q9Z238;Q9CSV7;Q7TMS8	G1/S-specific cyclin-E2	Ccne2	tr|A2API1|A2API1_MOUSE Cyclin E2, isoform CRA_a OS=Mus musculus GN=Ccne2 PE=3 SV=1;tr|Q544H6|Q544H6_MOUSE Cyclin E2, isoform CRA_b OS=Mus musculus GN=Ccne2 PE=2 SV=1;sp|Q9Z238|CCNE2_MOUSE G1/S-specific cyclin-E2 OS=Mus musculus GN=Ccne2 PE=2 SV=1;tr|Q9CSV7	106060000	151060000	12692000	12848000	5050500	7193200	604390	83570000	102190000	68704000	3	3	3	12.7	12.7	12.7	46.582	0	9.2596	269810000	6	2	3	1	2	3	1	2	3	1	2	3	1
247	A2API3;Q80V86	A2API3;Q80V86	Integrator complex subunit 8	Ints8	tr|A2API3|A2API3_MOUSE Integrator complex subunit 8 OS=Mus musculus GN=Ints8 PE=4 SV=1;sp|Q80V86|INT8_MOUSE Integrator complex subunit 8 OS=Mus musculus GN=Ints8 PE=2 SV=1	732590000	848220000	819550000	46161000	14088000	16312000	15761000	972360000	763810000	808840000	16	16	16	25.5	25.5	25.5	111.38	0	64.687	2400400000	43	12	12	10	12	12	10	12	12	10	15	16	12
248	A2API8;Q69ZV5;O54931-5;O54931-4;A2API9	A2API8;Q69ZV5;O54931-5;O54931-4	A-kinase anchor protein 2	Akap2;mKIAA0920	tr|A2API8|A2API8_MOUSE A-kinase anchor protein 2 OS=Mus musculus GN=Akap2 PE=4 SV=1;tr|Q69ZV5|Q69ZV5_MOUSE MKIAA0920 protein (Fragment) OS=Mus musculus GN=mKIAA0920 PE=2 SV=1;sp|O54931-5|AKAP2_MOUSE Isoform 5 of A-kinase anchor protein 2 OS=Mus musculus GN	71837000	0	0	1596400	1596400	0	0	71837000	0	0	33	1	0	48	1.2	0	101.6	1	-2	71837000	0	26	24	25	1	0	0	0	0	0	0	0	0
249	Q3UNN2;Q3U8S1;Q3U468;A2APM5;A2APM3;A2APM4;E9QKM8;Q80X37;A2APM1;A2APM2;P15379-2;P15379-3;P15379-6;P15379-11;P15379-5;P15379-10;P15379-9;P15379-4;P15379-8;P15379-7;P15379;Q3TLT9;P15379-12;P15379-13	Q3UNN2;Q3U8S1;Q3U468;A2APM5;A2APM3;A2APM4;E9QKM8;Q80X37;A2APM1;A2APM2;P15379-2;P15379-3;P15379-6;P15379-11;P15379-5;P15379-10;P15379-9;P15379-4;P15379-8;P15379-7;P15379;Q3TLT9	CD44 antigen	Cd44	tr|Q3UNN2|Q3UNN2_MOUSE Putative uncharacterized protein OS=Mus musculus GN=Cd44 PE=2 SV=1;tr|Q3U8S1|Q3U8S1_MOUSE CD44 antigen OS=Mus musculus GN=Cd44 PE=1 SV=1;tr|Q3U468|Q3U468_MOUSE Putative uncharacterized protein OS=Mus musculus GN=Cd44 PE=2 SV=1;tr|A2A	5110400000	5957100000	5525300000	1106200000	340700000	397140000	368360000	4602600000	5825700000	5712500000	10	10	10	30.4	30.4	30.4	40.247	0	72.516	16593000000	39	8	8	9	8	8	9	8	8	9	13	15	11
250	Q8K1K8;A2APR8;O08901;Q9CS10;Q8C4D0	Q8K1K8;A2APR8;O08901	Mitotic checkpoint serine/threonine-protein kinase BUB1	Bub1	tr|Q8K1K8|Q8K1K8_MOUSE Budding uninhibited by benzimidazoles 1 homolog (S. cerevisiae) OS=Mus musculus GN=Bub1 PE=2 SV=1;tr|A2APR8|A2APR8_MOUSE Mitotic checkpoint serine/threonine-protein kinase BUB1 OS=Mus musculus GN=Bub1 PE=4 SV=1;sp|O08901|BUB1_MOUSE M	435790000	329170000	339030000	19368000	7645400	5775000	5947800	418090000	350880000	436340000	13	13	13	19.7	19.7	19.7	119.7	0	46.77	1104000000	29	9	10	7	9	10	7	9	10	7	11	10	8
251	F8VPR2;A2APV2;E9PXE6;A2APV2-2;A2APV2-3;F6XR20;A2AQW2;Q6P247;Q8BI52;A2AQW3	F8VPR2;A2APV2;E9PXE6;A2APV2-2;A2APV2-3;F6XR20	Formin-like protein 2	Fmnl2	tr|F8VPR2|F8VPR2_MOUSE Formin-like protein 2 OS=Mus musculus GN=Fmnl2 PE=4 SV=1;sp|A2APV2|FMNL2_MOUSE Formin-like protein 2 OS=Mus musculus GN=Fmnl2 PE=2 SV=2;tr|E9PXE6|E9PXE6_MOUSE Formin-like protein 2 OS=Mus musculus GN=Fmnl2 PE=4 SV=2;sp|A2APV2-2|FMNL2	1432200000	1097500000	1796600000	63621000	21062000	16139000	26420000	1344500000	1550200000	1647200000	25	25	18	25	25	18.7	122.91	0	47.375	4326200000	51	14	15	16	14	15	16	9	10	9	18	16	17
252	A2APX3;Q3U5K7;Q9EPX9;P21460	A2APX3;Q3U5K7;Q9EPX9;P21460	Cystatin-C	Cst3	tr|A2APX3|A2APX3_MOUSE Cystatin-C (Fragment) OS=Mus musculus GN=Cst3 PE=4 SV=1;tr|Q3U5K7|Q3U5K7_MOUSE Putative uncharacterized protein (Fragment) OS=Mus musculus GN=Cst3 PE=2 SV=1;tr|Q9EPX9|Q9EPX9_MOUSE Cystatin C OS=Mus musculus GN=Cst3 PE=2 SV=1;sp|P2146	0	27263000	0	3407900	0	3407900	0	0	26155000	0	1	1	1	15.7	15.7	15.7	11.141	0.0097511	1.5335	27263000	1	0	1	0	0	1	0	0	1	0	0	1	0
253	B2RXU2;A2APY6;Q3V1V3;Q8BK69;Q9D801;Q8BM03;Q8K089	B2RXU2;A2APY6;Q3V1V3	ESF1 homolog	Esf1	tr|B2RXU2|B2RXU2_MOUSE ESF1, nucleolar pre-rRNA processing protein, homolog (S. cerevisiae) OS=Mus musculus GN=Esf1 PE=2 SV=1;tr|A2APY6|A2APY6_MOUSE ESF1, nucleolar pre-rRNA processing protein, homolog (S. cerevisiae) OS=Mus musculus GN=Esf1 PE=2 SV=1;sp|Q	877020000	651440000	658180000	50852000	20396000	15150000	15306000	776500000	660470000	773990000	21	21	21	26.4	26.4	26.4	98.042	0	47.458	2186600000	46	12	15	15	12	15	15	12	15	15	15	17	14
254	A2APY7;A2APY7-2	A2APY7	NADH dehydrogenase [ubiquinone] 1 alpha subcomplex assembly factor 5	Ndufaf5	sp|A2APY7|NDUF5_MOUSE NADH dehydrogenase [ubiquinone] 1 alpha subcomplex assembly factor 5 OS=Mus musculus GN=Ndufaf5 PE=2 SV=1	349620000	295030000	522260000	55567000	16649000	14049000	24870000	407320000	389730000	461170000	6	6	6	19.8	19.8	19.8	38.404	0	11.91	1166900000	16	4	4	6	4	4	6	4	4	6	6	4	6
255	A2AQ17;Q9CWX2	A2AQ17;Q9CWX2	Complex I intermediate-associated protein 30, mitochondrial	Ndufaf1	tr|A2AQ17|A2AQ17_MOUSE Complex I intermediate-associated protein 30, mitochondrial OS=Mus musculus GN=Ndufaf1 PE=4 SV=1;sp|Q9CWX2|CIA30_MOUSE Complex I intermediate-associated protein 30, mitochondrial OS=Mus musculus GN=Ndufaf1 PE=2 SV=2	408820000	487080000	221280000	46549000	17034000	20295000	9220100	304510000	409630000	357850000	10	10	10	30.2	30.2	30.2	37.782	0	19.434	1117200000	19	6	5	4	6	5	4	6	5	4	7	8	4
256	A2AQ19;Q3UXG8	A2AQ19;Q3UXG8	RNA polymerase-associated protein RTF1 homolog	Rtf1	sp|A2AQ19|RTF1_MOUSE RNA polymerase-associated protein RTF1 homolog OS=Mus musculus GN=Rtf1 PE=1 SV=1;tr|Q3UXG8|Q3UXG8_MOUSE Putative uncharacterized protein (Fragment) OS=Mus musculus GN=Rtf1 PE=2 SV=1	1057500000	897630000	579120000	60339000	25178000	21372000	13789000	934710000	910990000	592050000	13	13	13	20.1	20.1	20.1	80.796	0	78.77	2534200000	43	11	10	11	11	10	11	11	10	11	17	13	13
257	A2AQ43;A2AQ44;A2AQ42;A2AQ45;A2AQ41;Q80TY0-2;Q80TY0-3;Q80TY0;Q80TY0-5;Q80TY0-4;A2AQ47;Q61053;F6VVN1	A2AQ43;A2AQ44;A2AQ42;A2AQ45;A2AQ41;Q80TY0-2;Q80TY0-3;Q80TY0;Q80TY0-5;Q80TY0-4	Formin-binding protein 1	Fnbp1	tr|A2AQ43|A2AQ43_MOUSE Formin-binding protein 1 OS=Mus musculus GN=Fnbp1 PE=1 SV=1;tr|A2AQ44|A2AQ44_MOUSE Formin-binding protein 1 OS=Mus musculus GN=Fnbp1 PE=1 SV=1;tr|A2AQ42|A2AQ42_MOUSE Formin-binding protein 1 OS=Mus musculus GN=Fnbp1 PE=1 SV=1;tr|A2AQ	44281000	58721000	24389000	3639800	1265200	1677800	696820	40552000	47454000	47971000	4	4	4	9.4	9.4	9.4	64.628	0.0001584	5.8965	127390000	8	4	3	2	4	3	2	4	3	2	3	3	2
258	A2AQA0;A2ANU7;B6ZLR4;Q8CII6;Q8K056	A2AQA0;A2ANU7;B6ZLR4;Q8CII6;Q8K056		Zfp442;Zfp937;3300002I08Rik	tr|A2AQA0|A2AQA0_MOUSE Protein Zfp442 OS=Mus musculus GN=Zfp442 PE=2 SV=1;tr|A2ANU7|A2ANU7_MOUSE Protein Zfp937 OS=Mus musculus GN=Zfp937 PE=2 SV=1;tr|B6ZLR4|B6ZLR4_MOUSE Zinc-finger protein in podocyte III OS=Mus musculus GN=3300002I08Rik PE=2 SV=1;tr|Q8C	3233300	34069000	77305000	2010700	56725	597700	1356200	0	58957000	61129000	5	5	3	7.9	7.9	4.5	77.634	0.00057127	3.4045	114610000	7	1	3	4	1	3	4	1	2	2	0	3	4
259	A2AQA7;Q8CFQ3;REV__Q8CD59;REV__Q3TQ85;REV__Q3V3Y8;REV__B9EKN1;REV__Q9Z0R6-2;REV__Q80TG5;REV__E9QNG1;REV__Q9Z0R6;REV__B2RR82	A2AQA7;Q8CFQ3	Intron-binding protein aquarius	Aqr	tr|A2AQA7|A2AQA7_MOUSE Intron-binding protein aquarius OS=Mus musculus GN=Aqr PE=4 SV=1;sp|Q8CFQ3|AQR_MOUSE Intron-binding protein aquarius OS=Mus musculus GN=Aqr PE=2 SV=2	3750400000	2549200000	2774400000	112020000	46301000	31472000	34252000	3527800000	2790800000	3242900000	41	41	41	41.8	41.8	41.8	161.85	0	185.96	9074000000	109	27	29	31	27	29	31	27	29	31	42	33	34
260	Q8C4G3;Q8C288;Q505G9;A2AQC3;Q6DI68;O70228	Q8C4G3;Q8C288;Q505G9;A2AQC3;Q6DI68;O70228	Phospholipid-transporting ATPase;Probable phospholipid-transporting ATPase IIA	Atp9a	tr|Q8C4G3|Q8C4G3_MOUSE Probable phospholipid-transporting ATPase IIA OS=Mus musculus GN=Atp9a PE=2 SV=1;tr|Q8C288|Q8C288_MOUSE ATPase, class II, type 9A, isoform CRA_c OS=Mus musculus GN=Atp9a PE=2 SV=1;tr|Q505G9|Q505G9_MOUSE ATPase, class II, type 9A OS=M	0	132720000	0	2328400	0	2328400	0	0	142690000	0	3	3	3	4.6	4.6	4.6	116.42	0.00014708	4.0955	132720000	3	0	3	0	0	3	0	0	3	0	0	3	0
261	Q8C443;A2AQC8;B5B2R5;B5B2P8;B5B2Q4;B5B2P6;B5B2Q2;B5B2P7;Q60591-4;Q60591-2;Q60591;B5B2R8;Q3TTU8;B5B2Q6;Q6P3F6;B5B2R0;B5B2Q8;B5B2Q9	Q8C443;A2AQC8;B5B2R5;B5B2P8;B5B2Q4;B5B2P6;B5B2Q2;B5B2P7;Q60591-4;Q60591-2;Q60591;B5B2R8;Q3TTU8;B5B2Q6;Q6P3F6	Nuclear factor of activated T-cells, cytoplasmic 2	Nfatc2	tr|Q8C443|Q8C443_MOUSE Nuclear factor of activated T-cells c2 isoform IA-IIS-VIIa OS=Mus musculus GN=Nfatc2 PE=2 SV=1;tr|A2AQC8|A2AQC8_MOUSE Nuclear factor of activated T-cells c2 isoform IA-IIL-VIIa OS=Mus musculus GN=Nfatc2 PE=2 SV=1;tr|B5B2R5|B5B2R5_MOU	5417300	39686000	15948000	2180400	193480	1417400	569570	16697000	29933000	20696000	3	3	3	13.1	13.1	13.1	48.908	0.00015067	4.6123	61052000	7	1	3	2	1	3	2	1	3	2	1	4	2
262	A2AQD6;A2AQD5;Q922B9;Q922B9-3;Q3TEM8;Q922B9-2	A2AQD6;A2AQD5;Q922B9;Q922B9-3;Q3TEM8	Sperm-specific antigen 2 homolog	Ssfa2	tr|A2AQD6|A2AQD6_MOUSE Sperm-specific antigen 2 homolog OS=Mus musculus GN=Ssfa2 PE=1 SV=1;tr|A2AQD5|A2AQD5_MOUSE Sperm-specific antigen 2 homolog OS=Mus musculus GN=Ssfa2 PE=1 SV=1;sp|Q922B9|SSFA2_MOUSE Sperm-specific antigen 2 homolog OS=Mus musculus GN=	482770000	464540000	428950000	20852000	7314700	7038500	6499200	532730000	494870000	442300000	10	10	10	13.5	13.5	13.5	133.46	0	88.348	1376300000	26	7	7	8	7	7	8	7	7	8	8	8	10
263	A2AQE2;Q6A098;Q6IR00;F6QQ13;Q3TEC4;Q501P3;Q8C7M0	A2AQE2;Q6A098	Selenocysteine insertion sequence-binding protein 2-like	Secisbp2l	tr|A2AQE2|A2AQE2_MOUSE SECIS binding protein 2-like OS=Mus musculus GN=Secisbp2l PE=1 SV=1;sp|Q6A098|SBP2L_MOUSE Selenocysteine insertion sequence-binding protein 2-like OS=Mus musculus GN=Secisbp2l PE=1 SV=2	93819000	267920000	75104000	8736800	1876400	5358300	1502100	132140000	168760000	178440000	7	7	7	10.1	10.1	10.1	119.75	0	21.502	436840000	16	5	4	4	5	4	4	5	4	4	6	5	5
264	A2AQJ7;A2AQJ5;A2AQJ6;Q8BXN9;Q8BXN9-2;Q8BXN9-3	A2AQJ7;A2AQJ5;A2AQJ6;Q8BXN9;Q8BXN9-2;Q8BXN9-3	Transmembrane protein 87A	Tmem87a	tr|A2AQJ7|A2AQJ7_MOUSE Transmembrane protein 87A OS=Mus musculus GN=Tmem87a PE=4 SV=1;tr|A2AQJ5|A2AQJ5_MOUSE Transmembrane protein 87A OS=Mus musculus GN=Tmem87a PE=1 SV=1;tr|A2AQJ6|A2AQJ6_MOUSE Transmembrane protein 87A OS=Mus musculus GN=Tmem87a PE=1 SV=	491860000	437400000	442870000	52774000	18918000	16823000	17033000	444400000	486130000	424320000	9	9	9	20.2	20.2	20.2	57.011	0	34.587	1372100000	25	6	6	8	6	6	8	6	6	8	9	6	10
265	A2AQL0;Q9Z1W9;G1JLS7;Q3V256;Q3TR01	A2AQL0;Q9Z1W9;G1JLS7;Q3V256	STE20/SPS1-related proline-alanine-rich protein kinase	Stk39	tr|A2AQL0|A2AQL0_MOUSE Serine/threonine kinase 39, STE20/SPS1 homolog (Yeast) OS=Mus musculus GN=Stk39 PE=4 SV=1;sp|Q9Z1W9|STK39_MOUSE STE20/SPS1-related proline-alanine-rich protein kinase OS=Mus musculus GN=Stk39 PE=1 SV=1;tr|G1JLS7|G1JLS7_MOUSE Kidney-s	954060000	1279700000	863490000	123890000	38162000	51188000	34540000	1185800000	1026400000	939940000	19	19	15	50.5	50.5	42.8	60.319	0	37.758	3097200000	46	15	15	14	15	15	14	11	11	11	12	18	16
266	Q8N9U3;Q8C1A8;Q8C141;Q8C113;A2AQN5;A2AQN4;Q9QXG4;D6RHA7;Q8BY91	Q8N9U3;Q8C1A8;Q8C141;Q8C113;A2AQN5;A2AQN4;Q9QXG4;D6RHA7;Q8BY91	Acetyl-coenzyme A synthetase, cytoplasmic	Acss2	tr|Q8N9U3|Q8N9U3_MOUSE cDNA fis, clone TRACH2001275, highly similar to Mus musculus acetyl-CoA synthetase mRNA OS=Mus musculus GN=Acss2 PE=2 SV=1;tr|Q8C1A8|Q8C1A8_MOUSE Putative uncharacterized protein OS=Mus musculus GN=Acss2 PE=2 SV=1;tr|Q8C141|Q8C141_MO	169000000	378770000	243880000	23989000	5121100	11478000	7390300	270530000	282570000	325330000	4	4	4	7.7	7.7	7.7	78.82	0	15.466	791650000	13	2	4	4	2	4	4	2	4	4	3	5	5
267	A2AQQ8;Q3TYI4;Q06219;Q9R1W4;A2VCP6;A2VCP5;F6R7A2;Q9QZB6-2;Q06219-2;Q9QZB6	A2AQQ8;Q3TYI4;Q06219;Q9R1W4;A2VCP6;A2VCP5;F6R7A2;Q9QZB6-2;Q06219-2;Q9QZB6	Nuclear receptor subfamily 4 group A member 2;Nuclear receptor subfamily 4 group A member 3	Nr4a2;Nr4a3	tr|A2AQQ8|A2AQQ8_MOUSE Nuclear receptor subfamily 4 group A member 2 OS=Mus musculus GN=Nr4a2 PE=3 SV=1;tr|Q3TYI4|Q3TYI4_MOUSE Nuclear receptor subfamily 4, group A, member 2 OS=Mus musculus GN=Nr4a2 PE=2 SV=1;sp|Q06219|NR4A2_MOUSE Nuclear receptor subfami	0	0	0	0	0	0	0	0	0	0	2	2	2	4.9	4.9	4.9	59.81	1	-2	0	0	1	0	1	1	0	1	1	0	1	0	0	0
268	A2AQR0;Q64521	A2AQR0;Q64521	Glycerol-3-phosphate dehydrogenase;Glycerol-3-phosphate dehydrogenase, mitochondrial	Gpd2	tr|A2AQR0|A2AQR0_MOUSE Glycerol-3-phosphate dehydrogenase, mitochondrial OS=Mus musculus GN=Gpd2 PE=1 SV=1;sp|Q64521|GPDM_MOUSE Glycerol-3-phosphate dehydrogenase, mitochondrial OS=Mus musculus GN=Gpd2 PE=1 SV=2	9531400000	8852600000	8478400000	548210000	194520000	180660000	173030000	9640700000	9652200000	8979600000	41	41	41	68.1	68.1	68.1	82.829	0	309.35	26862000000	173	33	37	34	33	37	34	33	37	34	59	55	59
269	A2AQT8;A2AQT7;Q99LS1	A2AQT8;A2AQT7;Q99LS1	Methylmalonic aciduria and homocystinuria type D homolog, mitochondrial	Mmadhc	tr|A2AQT8|A2AQT8_MOUSE Methylmalonic aciduria and homocystinuria type D homolog, mitochondrial (Fragment) OS=Mus musculus GN=Mmadhc PE=4 SV=1;tr|A2AQT7|A2AQT7_MOUSE Methylmalonic aciduria and homocystinuria type D homolog, mitochondrial (Fragment) OS=Mus m	34987000	0	0	3887400	3887400	0	0	34525000	0	0	1	1	1	7.3	7.3	7.3	19.807	0.0043587	1.9593	34987000	0	1	0	0	1	0	0	1	0	0	0	0	0
270	A2AQU8;Q9D975	A2AQU8;Q9D975	Sulfiredoxin-1	Srxn1	tr|A2AQU8|A2AQU8_MOUSE Sulfiredoxin OS=Mus musculus GN=Srxn1 PE=3 SV=1;sp|Q9D975|SRXN1_MOUSE Sulfiredoxin-1 OS=Mus musculus GN=Srxn1 PE=2 SV=1	53845000	155510000	68745000	27809000	5384500	15551000	6874500	85492000	148220000	68332000	3	3	3	47.1	47.1	47.1	16.063	0.00016218	6.6137	278090000	6	1	3	2	1	3	2	1	3	2	2	3	1
271	A2AQY8;Q05CI8;Q8BTY1	A2AQY8;Q05CI8;Q8BTY1	Kynurenine--oxoglutarate transaminase 1	Ccbl1	tr|A2AQY8|A2AQY8_MOUSE Kynurenine--oxoglutarate transaminase 1 OS=Mus musculus GN=Ccbl1 PE=1 SV=1;tr|Q05CI8|Q05CI8_MOUSE Ccbl1 protein OS=Mus musculus GN=Ccbl1 PE=2 SV=1;sp|Q8BTY1|KAT1_MOUSE Kynurenine--oxoglutarate transaminase 1 OS=Mus musculus GN=Ccbl1	0	24635000	0	1539700	0	1539700	0	0	19805000	0	1	1	1	3.5	3.5	3.5	42.235	0.0046059	1.9022	24635000	1	0	1	0	0	1	0	0	1	0	0	1	0
272	A2AQZ5;A2AQZ7;Q9DB26;A2AQZ2;B7ZNN8;D6RIQ3;D6RI61	A2AQZ5;A2AQZ7;Q9DB26;A2AQZ2;B7ZNN8;D6RIQ3;D6RI61	Phytanoyl-CoA dioxygenase domain-containing protein 1	Phyhd1	tr|A2AQZ5|A2AQZ5_MOUSE Phytanoyl-CoA dioxygenase domain-containing protein 1 (Fragment) OS=Mus musculus GN=Phyhd1 PE=4 SV=1;tr|A2AQZ7|A2AQZ7_MOUSE Phytanoyl-CoA dioxygenase domain-containing protein 1 OS=Mus musculus GN=Phyhd1 PE=4 SV=1;sp|Q9DB26|PHYD1_MOU	118920000	188960000	151350000	35325000	9147400	14535000	11642000	132930000	160970000	186820000	5	5	5	33.8	33.8	33.8	24.771	0	11.64	459220000	11	3	4	4	3	4	4	3	4	4	4	4	3
273	Q05CC5;Q504N1;Q05DE4;B2RWT5;A2AR02;Q80VC1;A2AR01;Q3UZ38	Q05CC5;Q504N1;Q05DE4;B2RWT5;A2AR02;Q80VC1;A2AR01;Q3UZ38	Peptidyl-prolyl cis-trans isomerase G;Peptidyl-prolyl cis-trans isomerase	Ppig	tr|Q05CC5|Q05CC5_MOUSE Ppig protein (Fragment) OS=Mus musculus GN=Ppig PE=2 SV=1;tr|Q504N1|Q504N1_MOUSE Ppig protein (Fragment) OS=Mus musculus GN=Ppig PE=2 SV=1;tr|Q05DE4|Q05DE4_MOUSE Ppig protein (Fragment) OS=Mus musculus GN=Ppig PE=2 SV=1;tr|B2RWT5|B2R	951540000	1260000000	939390000	157540000	47577000	62998000	46970000	807110000	1099100000	1591700000	8	8	8	26.3	26.3	26.3	46.291	0	33.638	3150900000	19	7	5	5	7	5	5	7	5	5	8	5	6
274	A2AR12;Q8BKH7-2;Q8BKH7;A2AR15;Q8BKH7-3	A2AR12;Q8BKH7-2;Q8BKH7;A2AR15;Q8BKH7-3	Target of rapamycin complex 2 subunit MAPKAP1	Mapkap1	tr|A2AR12|A2AR12_MOUSE Target of rapamycin complex 2 subunit MAPKAP1 (Fragment) OS=Mus musculus GN=Mapkap1 PE=4 SV=1;sp|Q8BKH7-2|SIN1_MOUSE Isoform 2 of Target of rapamycin complex 2 subunit MAPKAP1 OS=Mus musculus GN=Mapkap1;sp|Q8BKH7|SIN1_MOUSE Target of	97647000	277890000	721080000	39165000	3487400	9924700	25753000	146600000	271170000	725110000	8	8	8	19.5	19.5	19.5	58.608	0	21.88	1096600000	14	2	7	6	2	7	6	2	7	6	2	5	7
275	A2AR27;A2AR26;Q8BTN2;Q3UDF0	A2AR27;A2AR26;Q8BTN2;Q3UDF0		Slc2a6	tr|A2AR27|A2AR27_MOUSE Protein Slc2a6 (Fragment) OS=Mus musculus GN=Slc2a6 PE=1 SV=2;tr|A2AR26|A2AR26_MOUSE Protein Slc2a6 OS=Mus musculus GN=Slc2a6 PE=1 SV=1;tr|Q8BTN2|Q8BTN2_MOUSE Putative uncharacterized protein OS=Mus musculus GN=Slc2a6 PE=2 SV=1;tr|Q3	0	29188000	20927000	10023000	0	5837600	4185400	0	31312000	18969000	1	1	1	22.4	22.4	22.4	9.3215	0.00014843	4.2703	50115000	2	0	1	1	0	1	1	0	1	1	0	1	1
276	A2AR56;Q6P5H6;Q8BXT6;F6XM46;B0R0D5;B0R0D4;Q6P5H6-4;Q6P5H6-3;Q6P5H6-2;Q8BX61;Q8BW31;F6XLQ6;F2Z484	A2AR56;Q6P5H6;Q8BXT6;F6XM46;B0R0D5;B0R0D4;Q6P5H6-4;Q6P5H6-3;Q6P5H6-2	FERM domain-containing protein 5	Frmd5	tr|A2AR56|A2AR56_MOUSE FERM domain-containing protein 5 OS=Mus musculus GN=Frmd5 PE=4 SV=1;sp|Q6P5H6|FRMD5_MOUSE FERM domain-containing protein 5 OS=Mus musculus GN=Frmd5 PE=2 SV=1;tr|Q8BXT6|Q8BXT6_MOUSE Putative uncharacterized protein OS=Mus musculus GN=	137980000	263060000	81592000	12375000	3537900	6745100	2092100	148180000	125840000	187410000	9	9	9	20.2	20.2	20.2	64.919	0	19.129	482630000	13	6	6	3	6	6	3	6	6	3	5	5	3
277	A2AR78;Q8R383;Q8C2D3;Q3TNB4;Q3UGW0;A2AR76;P70347-4;P70347-2;P70347	A2AR78;Q8R383;Q8C2D3;Q3TNB4;Q3UGW0;A2AR76;P70347-4;P70347-2;P70347	TRAF family member-associated NF-kappa-B activator	Tank	tr|A2AR78|A2AR78_MOUSE TRAF family member-associated NF-kappa-B activator OS=Mus musculus GN=Tank PE=4 SV=1;tr|Q8R383|Q8R383_MOUSE Tank protein OS=Mus musculus GN=Tank PE=2 SV=1;tr|Q8C2D3|Q8C2D3_MOUSE TRAF family member-associated NF-kappa-B activator OS=M	0	41401000	0	1971500	0	1971500	0	0	48990000	0	1	1	1	6.1	6.1	6.1	40.906	0.00014754	4.1509	41401000	2	0	1	0	0	1	0	0	1	0	0	2	0
278	A2ARA8;G3UYN5;A2ARA8-2;G3UYV5	A2ARA8;G3UYN5	Integrin alpha-8;Integrin alpha-8 heavy chain;Integrin alpha-8 light chain	Itga8	sp|A2ARA8|ITA8_MOUSE Integrin alpha-8 OS=Mus musculus GN=Itga8 PE=1 SV=1;tr|G3UYN5|G3UYN5_MOUSE Integrin alpha-8 OS=Mus musculus GN=Itga8 PE=3 SV=1	1291200000	1001700000	348170000	52820000	25823000	20034000	6963300	981210000	804910000	851490000	14	14	14	21	21	21	117.55	0	43.74	2641000000	35	11	11	7	11	11	7	11	11	7	14	12	9
279	A2ARP8;Q9QYR6;Q9QYR6-2	A2ARP8;Q9QYR6;Q9QYR6-2	Microtubule-associated protein 1A;MAP1A heavy chain;MAP1 light chain LC2	Map1a	tr|A2ARP8|A2ARP8_MOUSE Microtubule-associated protein 1A OS=Mus musculus GN=Map1a PE=1 SV=1;sp|Q9QYR6|MAP1A_MOUSE Microtubule-associated protein 1A OS=Mus musculus GN=Map1a PE=1 SV=2;sp|Q9QYR6-2|MAP1A_MOUSE Isoform 2 of Microtubule-associated protein 1A OS	3230200000	3277000000	3543500000	69796000	22432000	22757000	24607000	3534900000	3499400000	3678600000	57	55	55	32.8	32.1	32.1	325.88	0	206.03	10051000000	140	40	40	41	39	38	40	39	38	40	46	42	52
280	A2ART0;F7CEW8;A2BE23;A2ART4;A2ARX1;Q8R118;Q569M1;E9QA51;Q569M0;A2ARW1;A2BFU4;A2AW67;A2ARR7;A2BFG5;A2ARL5;A2ARW8;A2BG91	A2ART0;F7CEW8;A2BE23;A2ART4;A2ARX1		Gm6710;Gm4631;Gm14305;Gm14434;Gm14391	tr|A2ART0|A2ART0_MOUSE Protein Gm14391 OS=Mus musculus GN=Gm6710 PE=4 SV=1;tr|F7CEW8|F7CEW8_MOUSE Protein Gm4631 OS=Mus musculus GN=Gm4631 PE=4 SV=1;tr|A2BE23|A2BE23_MOUSE Novel KRAB box and zinc finger, C2H2 type domain containing protein OS=Mus musculus	13225000	45659000	15792000	1659500	293900	1014600	350930	11196000	0	21313000	3	2	2	6.5	5.1	5.1	64.074	0.00014854	4.2858	74676000	2	1	1	2	1	1	1	1	1	1	1	0	1
281	A2ARZ3	A2ARZ3	Fibrous sheath-interacting protein 2	Fsip2	sp|A2ARZ3|FSIP2_MOUSE Fibrous sheath-interacting protein 2 OS=Mus musculus GN=Fsip2 PE=1 SV=3	31427000	275440000	0	765260	78371	686890	0	0	269410000	0	5	5	5	0.8	0.8	0.8	784.85	0.00057225	3.4279	306870000	3	2	4	1	2	4	1	2	4	1	1	2	0
282	A2AS03;E9QAM5;A2AS05;Q922U3;Q3TZD5;Q7TT03;Q69ZA7;Q3T9X6	A2AS03;E9QAM5;A2AS05;Q922U3	Helicase with zinc finger domain 2	Helz2	tr|A2AS03|A2AS03_MOUSE Helicase with zinc finger domain 2 OS=Mus musculus GN=Helz2 PE=4 SV=1;sp|E9QAM5|HELZ2_MOUSE Helicase with zinc finger domain 2 OS=Mus musculus GN=Helz2 PE=1 SV=1;tr|A2AS05|A2AS05_MOUSE Helicase with zinc finger domain 2 OS=Mus muscul	28579000	23551000	144510000	1104700	160560	132310	811860	0	0	156350000	7	7	7	3.5	3.5	3.5	334	0	8.7228	196640000	6	2	2	4	2	2	4	2	2	4	2	1	3
283	A2AS45;Q68FH0-2;Q68FH0;Q3UIX3;A2AS44;Q05D18;A2AS47;V9GXG7;Q3US07;Q3USD8;Q68FH0-3	A2AS45;Q68FH0-2;Q68FH0;Q3UIX3;A2AS44;Q05D18	Plakophilin-4	Pkp4	tr|A2AS45|A2AS45_MOUSE Plakophilin-4 OS=Mus musculus GN=Pkp4 PE=1 SV=1;sp|Q68FH0-2|PKP4_MOUSE Isoform 2 of Plakophilin-4 OS=Mus musculus GN=Pkp4;sp|Q68FH0|PKP4_MOUSE Plakophilin-4 OS=Mus musculus GN=Pkp4 PE=1 SV=1;tr|Q3UIX3|Q3UIX3_MOUSE Putative uncharacte	117260000	148880000	281110000	7496600	1606300	2039500	3850900	135000000	209230000	218130000	9	9	7	10.7	10.7	9	128.53	0	12.392	547250000	16	6	4	6	6	4	6	4	3	5	4	4	8
284	A2AS54;Q3UGP2;Q8K2I9;Q8K2I9-2;A2AS52	A2AS54;Q3UGP2;Q8K2I9;Q8K2I9-2	F-box only protein 18	Fbxo18	tr|A2AS54|A2AS54_MOUSE F-box only protein 18 OS=Mus musculus GN=Fbxo18 PE=4 SV=1;tr|Q3UGP2|Q3UGP2_MOUSE Putative uncharacterized protein OS=Mus musculus GN=Fbxo18 PE=2 SV=1;sp|Q8K2I9|FBX18_MOUSE F-box only protein 18 OS=Mus musculus GN=Fbxo18 PE=2 SV=1;sp|	102980000	487070000	312920000	14803000	1688200	7984800	5129800	93587000	502810000	242210000	6	6	6	8.1	8.1	8.1	115.07	0.00028906	3.6479	902970000	11	2	5	4	2	5	4	2	5	4	2	6	3
285	A2AS70;Q5DTL6;O54826;Q8C7B0;A2AS72	A2AS70;Q5DTL6;O54826;Q8C7B0	Protein AF-10	Mllt10	tr|A2AS70|A2AS70_MOUSE Protein AF-10 OS=Mus musculus GN=Mllt10 PE=4 SV=1;tr|Q5DTL6|Q5DTL6_MOUSE MKIAA4140 protein (Fragment) OS=Mus musculus GN=Mllt10 PE=2 SV=1;sp|O54826|AF10_MOUSE Protein AF-10 OS=Mus musculus GN=Mllt10 PE=1 SV=2;tr|Q8C7B0|Q8C7B0_MOUSE P	106560000	137810000	133220000	14522000	4098400	5300300	5123700	119960000	136970000	139820000	7	7	7	12.3	12.3	12.3	104.53	0	11.143	377580000	15	4	6	4	4	6	4	4	6	4	5	5	5
286	A2ASK1;Q7TS68	A2ASK1;Q7TS68	Putative methyltransferase NSUN6	Nsun6	tr|A2ASK1|A2ASK1_MOUSE Putative methyltransferase NSUN6 OS=Mus musculus GN=Nsun6 PE=4 SV=1;sp|Q7TS68|NSUN6_MOUSE Putative methyltransferase NSUN6 OS=Mus musculus GN=Nsun6 PE=2 SV=2	12354000	24723000	8633500	1904600	514730	1030100	359730	11135000	19876000	0	2	2	2	9.4	9.4	9.4	46.328	0.00014633	3.9503	45710000	3	1	1	1	1	1	1	1	1	1	1	1	1
287	Q8BSD8;Q99KU2;A2ASP7	Q8BSD8;Q99KU2;A2ASP7		9430015G10Rik	tr|Q8BSD8|Q8BSD8_MOUSE Protein 9430015G10Rik OS=Mus musculus GN=9430015G10Rik PE=2 SV=1;tr|Q99KU2|Q99KU2_MOUSE Uncharacterized protein OS=Mus musculus GN=9430015G10Rik PE=2 SV=1;tr|A2ASP7|A2ASP7_MOUSE Protein 9430015G10Rik OS=Mus musculus GN=9430015G10Rik	21955000	0	27646000	8266900	3659200	0	4607700	32685000	0	31465000	1	1	1	13.8	13.8	13.8	17.987	0.0048595	1.8581	49601000	2	1	0	1	1	0	1	1	0	1	1	0	1
288	A2ASR6;A2ASR7;A2ASR8;Q3ULL2;Q2LC58;P25916;A2ASR5	A2ASR6;A2ASR7;A2ASR8;Q3ULL2;Q2LC58;P25916	Polycomb complex protein BMI-1	Bmi1	tr|A2ASR6|A2ASR6_MOUSE Polycomb complex protein BMI-1 (Fragment) OS=Mus musculus GN=Bmi1 PE=4 SV=1;tr|A2ASR7|A2ASR7_MOUSE Polycomb complex protein BMI-1 (Fragment) OS=Mus musculus GN=Bmi1 PE=4 SV=1;tr|A2ASR8|A2ASR8_MOUSE Polycomb complex protein BMI-1 (Fra	0	341420000	277500000	103150000	0	56904000	46250000	0	333620000	278300000	3	1	1	24.8	10.5	10.5	12.248	0.0016407	2.5396	618920000	4	2	3	2	0	1	1	0	1	1	0	2	2
289	A2ASS6;E9Q8N1;E9Q8K5;A2ASS6-2;Q3TZL3;F6Q6Z0;F7CR78	A2ASS6;E9Q8N1;E9Q8K5;A2ASS6-2	Titin	Ttn	sp|A2ASS6|TITIN_MOUSE Titin OS=Mus musculus GN=Ttn PE=1 SV=1;tr|E9Q8N1|E9Q8N1_MOUSE Titin OS=Mus musculus GN=Ttn PE=1 SV=1;tr|E9Q8K5|E9Q8K5_MOUSE Titin OS=Mus musculus GN=Ttn PE=1 SV=1;sp|A2ASS6-2|TITIN_MOUSE Isoform 2 of Titin OS=Mus musculus GN=Ttn	461280000	736160000	899320000	891860	196210	313130	382530	647980000	798950000	727870000	19	18	17	0.6	0.6	0.6	3906.4	0	8.3947	2096800000	37	10	11	12	9	10	11	8	9	10	12	10	15
290	A2ASW8;A2ASW4;Q571A8;Q9EQZ6-2;Q9EQZ6-3;Q9EQZ6	A2ASW8;A2ASW4;Q571A8;Q9EQZ6-2;Q9EQZ6-3;Q9EQZ6	Rap guanine nucleotide exchange factor 4	Rapgef4	tr|A2ASW8|A2ASW8_MOUSE Rap guanine nucleotide exchange factor (GEF) 4, isoform CRA_b OS=Mus musculus GN=Rapgef4 PE=2 SV=1;tr|A2ASW4|A2ASW4_MOUSE Rapgef4 protein OS=Mus musculus GN=Rapgef4 PE=2 SV=1;tr|Q571A8|Q571A8_MOUSE MKIAA4040 protein (Fragment) OS=Mus	7128900	9910300	4617300	401050	132020	183520	85506	0	9405900	8704500	2	2	2	2.4	2.4	2.4	99.503	0.007765	1.6525	21657000	3	1	1	1	1	1	1	1	1	1	1	1	1
291	Q505H1;Q05BL5;A2ASY1;Q5HZG4;Q8BKP6;A2ASY0	Q505H1;Q05BL5;A2ASY1;Q5HZG4;Q8BKP6;A2ASY0	Transcription initiation factor TFIID subunit 3	Taf3	tr|Q505H1|Q505H1_MOUSE Taf3 protein (Fragment) OS=Mus musculus GN=Taf3 PE=2 SV=1;tr|Q05BL5|Q05BL5_MOUSE Taf3 protein (Fragment) OS=Mus musculus GN=Taf3 PE=2 SV=1;tr|A2ASY1|A2ASY1_MOUSE TAF3 RNA polymerase II, TATA box binding protein (TBP)-associated facto	769620000	732480000	78734000	54512000	26539000	25258000	2715000	560900000	496840000	538220000	4	4	4	5.8	5.8	5.8	62.239	0.00070383	3.1059	1580800000	8	3	4	2	3	4	2	3	4	2	2	4	2
292	A2ASZ8-2;A2ASZ8-3;A2ASZ8;A2ASZ8-4;A2ASZ8-5;Z4YLR9;F6RC04	A2ASZ8-2;A2ASZ8-3;A2ASZ8;A2ASZ8-4;A2ASZ8-5;Z4YLR9	Calcium-binding mitochondrial carrier protein SCaMC-2	Slc25a25	sp|A2ASZ8-2|SCMC2_MOUSE Isoform 2 of Calcium-binding mitochondrial carrier protein SCaMC-2 OS=Mus musculus GN=Slc25a25;sp|A2ASZ8-3|SCMC2_MOUSE Isoform 3 of Calcium-binding mitochondrial carrier protein SCaMC-2 OS=Mus musculus GN=Slc25a25;sp|A2ASZ8|SCMC2_MO	628440000	403460000	426900000	48627000	20948000	13449000	14230000	547960000	543360000	346500000	6	6	5	18.9	18.9	17.3	55.287	0	23.34	1458800000	20	5	5	4	5	5	4	4	4	3	8	6	6
293	A2AT37;F6Q3G7;Q810R2	A2AT37;F6Q3G7		Upf2	tr|A2AT37|A2AT37_MOUSE Protein Upf2 OS=Mus musculus GN=Upf2 PE=2 SV=1;tr|F6Q3G7|F6Q3G7_MOUSE Protein Upf2 (Fragment) OS=Mus musculus GN=Upf2 PE=4 SV=1	875760000	921920000	896900000	37425000	12163000	12804000	12457000	1030800000	882760000	980750000	23	23	23	25.1	25.1	25.1	147.55	0	73.227	2694600000	55	16	14	16	16	14	16	16	14	16	16	18	21
294	Q3TG07;A2ATI9;Q3TX06;Q3TIK1;Q99JX3;A2ATI8;A2ATI6;Q99JX3-2;Q3V458;Q922I9	Q3TG07;A2ATI9;Q3TX06;Q3TIK1;Q99JX3;A2ATI8;A2ATI6;Q99JX3-2;Q3V458	Golgi reassembly-stacking protein 2	Gorasp2	tr|Q3TG07|Q3TG07_MOUSE Putative uncharacterized protein OS=Mus musculus GN=Gorasp2 PE=2 SV=1;tr|A2ATI9|A2ATI9_MOUSE Golgi reassembly stacking protein 2, isoform CRA_d OS=Mus musculus GN=Gorasp2 PE=1 SV=1;tr|Q3TX06|Q3TX06_MOUSE Putative uncharacterized prot	2423300000	2334500000	2865900000	508250000	161560000	155640000	191060000	2075000000	2505900000	2982600000	12	12	12	34.8	34.8	34.8	44.999	0	74.151	7623800000	44	10	9	10	10	9	10	10	9	10	15	14	15
295	Q7TR11;A2ATJ4	Q7TR11;A2ATJ4	Olfactory receptor	Olfr1200	tr|Q7TR11|Q7TR11_MOUSE Olfactory receptor OS=Mus musculus GN=Olfr1200 PE=3 SV=1;tr|A2ATJ4|A2ATJ4_MOUSE Olfactory receptor OS=Mus musculus GN=Olfr1200 PE=3 SV=1	0	0	0	0	0	0	0	0	0	0	1	1	1	2.1	2.1	2.1	38.45	1	-2	0	0	0	1	1	0	1	1	0	1	1	0	0	0
296	Q8K2R1;A2ATL1;A2ATL0;A2ATK9	Q8K2R1;A2ATL1;A2ATL0;A2ATK9		Fam171a1	tr|Q8K2R1|Q8K2R1_MOUSE Fam171a1 protein (Fragment) OS=Mus musculus GN=Fam171a1 PE=2 SV=1;tr|A2ATL1|A2ATL1_MOUSE MCG17280 OS=Mus musculus GN=Fam171a1 PE=4 SV=1;tr|A2ATL0|A2ATL0_MOUSE Protein Fam171a1 OS=Mus musculus GN=Fam171a1 PE=4 SV=1;tr|A2ATK9|A2ATK9_MO	0	13289000	0	885910	0	885910	0	0	15155000	0	1	1	1	12.5	12.5	12.5	35.93	0.0001489	4.3315	13289000	1	0	1	0	0	1	0	0	1	0	0	1	0
297	A2ATN9;Q9ES70	A2ATN9;Q9ES70	Serine/threonine-protein kinase Nek6	Nek6	tr|A2ATN9|A2ATN9_MOUSE Serine/threonine-protein kinase Nek6 OS=Mus musculus GN=Nek6 PE=4 SV=1;sp|Q9ES70|NEK6_MOUSE Serine/threonine-protein kinase Nek6 OS=Mus musculus GN=Nek6 PE=1 SV=1	64982000	61075000	51572000	8881500	3249100	3053800	2578600	58603000	54550000	60234000	3	2	2	13.6	10.9	10.9	34.721	0.00014674	4.0446	177630000	6	3	3	3	2	2	2	2	2	2	2	2	2
298	A2ATP6;A2ATP5;Q8C854-1;Q8C854-2;F6XJA1	A2ATP6;A2ATP5;Q8C854-1;Q8C854-2;F6XJA1	Myelin expression factor 2	Myef2	tr|A2ATP6|A2ATP6_MOUSE Myelin expression factor 2 OS=Mus musculus GN=Myef2 PE=4 SV=2;tr|A2ATP5|A2ATP5_MOUSE Myelin expression factor 2 OS=Mus musculus GN=Myef2 PE=4 SV=1;sp|Q8C854-1|MYEF2_MOUSE Isoform 3 of Myelin expression factor 2 OS=Mus musculus GN=Mye	5866000	17581000	11653000	1002900	167600	502330	332930	6874900	16867000	12530000	28	1	1	55	3.7	3.7	61.103	0.00056988	3.3706	35100000	2	25	22	27	1	1	1	1	1	1	0	1	1
299	A2VCP7;A2AU35;Q8BHL8	A2VCP7;A2AU35;Q8BHL8	Proteasome inhibitor PI31 subunit	Psmf1	tr|A2VCP7|A2VCP7_MOUSE Psmf1 protein (Fragment) OS=Mus musculus GN=Psmf1 PE=2 SV=1;tr|A2AU35|A2AU35_MOUSE Proteasome (Prosome, macropain) inhibitor subunit 1 OS=Mus musculus GN=Psmf1 PE=2 SV=1;sp|Q8BHL8|PSMF1_MOUSE Proteasome inhibitor PI31 subunit OS=Mus	203230000	418260000	243020000	66500000	15633000	32174000	18694000	196460000	311050000	382610000	5	5	5	26.5	26.5	26.5	26.073	0	40.904	864510000	13	3	5	2	3	5	2	3	5	2	4	6	3
300	Q3U3F6;A2AU62;Q64012-2;Q64012;Q3TGD3;A2AU61;A2AU60	Q3U3F6;A2AU62;Q64012-2;Q64012;Q3TGD3;A2AU61;A2AU60	RNA-binding protein Raly	Raly	tr|Q3U3F6|Q3U3F6_MOUSE HnRNP-associated with lethal yellow, isoform CRA_f OS=Mus musculus GN=Raly PE=2 SV=1;tr|A2AU62|A2AU62_MOUSE RNA-binding protein Raly (Fragment) OS=Mus musculus GN=Raly PE=1 SV=1;sp|Q64012-2|RALY_MOUSE Isoform 1 of RNA-binding protein	7419100000	7228200000	5900000000	1081400000	390480000	380430000	310530000	7030500000	6508200000	7095000000	19	19	19	62.2	62.2	62.2	31.198	0	161.7	20547000000	91	17	13	17	17	13	17	17	13	17	32	29	30
301	A2AU83;F6ZS36	A2AU83;F6ZS36		Gm14124;Gm14139	tr|A2AU83|A2AU83_MOUSE Protein Gm14124 OS=Mus musculus GN=Gm14124 PE=4 SV=1;tr|F6ZS36|F6ZS36_MOUSE Protein Gm14139 OS=Mus musculus GN=Gm14139 PE=4 SV=1	0	0	0	0	0	0	0	0	0	0	2	1	1	2.8	1.7	1.7	83.427	1	-2	0	0	0	1	1	0	1	0	0	1	0	0	0	0
302	A2AU91;P70399;A2AU89;P70399-3;P70399-2;Q3V1P7;Q8C0U1;Q8BZ87;Q8BLA0;A2AU90;Q3UG49;F6ZRL3;F6QNC8;F6S5E4	A2AU91;P70399;A2AU89;P70399-3;P70399-2	Tumor suppressor p53-binding protein 1	Trp53bp1;Tp53bp1	tr|A2AU91|A2AU91_MOUSE Tumor suppressor p53-binding protein 1 OS=Mus musculus GN=Trp53bp1 PE=1 SV=1;sp|P70399|TP53B_MOUSE Tumor suppressor p53-binding protein 1 OS=Mus musculus GN=Tp53bp1 PE=1 SV=2;tr|A2AU89|A2AU89_MOUSE Tumor suppressor p53-binding protei	2102400000	2596400000	1861100000	68333000	21900000	27046000	19387000	2234500000	2475500000	2067100000	37	37	37	36.1	36.1	36.1	212.73	0	217.82	6560000000	94	25	29	27	25	29	27	25	29	27	30	31	33
303	D6RJ69;A2AUC6;Q9CZQ9	D6RJ69;A2AUC6;Q9CZQ9	Bardet-Biedl syndrome 5 protein homolog	Bbs5	tr|D6RJ69|D6RJ69_MOUSE Bardet-Biedl syndrome 5 protein homolog OS=Mus musculus GN=Bbs5 PE=4 SV=1;tr|A2AUC6|A2AUC6_MOUSE Bardet-Biedl syndrome 5 protein homolog OS=Mus musculus GN=Bbs5 PE=4 SV=1;sp|Q9CZQ9|BBS5_MOUSE Bardet-Biedl syndrome 5 protein homolog O	0	11866000	0	1483300	0	1483300	0	0	11636000	0	1	1	1	14.8	14.8	14.8	9.9442	0.00070482	3.1351	11866000	1	0	1	0	0	1	0	0	1	0	0	1	0
304	Q3TAI4;Q9CZ22;A2AUD5;Q9CYZ2;V9GWU5	Q3TAI4;Q9CZ22;A2AUD5;Q9CYZ2;V9GWU5	Tumor protein D54	Tpd52l2	tr|Q3TAI4|Q3TAI4_MOUSE Tumor protein D52-like 2, isoform CRA_c OS=Mus musculus GN=Tpd52l2 PE=1 SV=1;tr|Q9CZ22|Q9CZ22_MOUSE Putative uncharacterized protein OS=Mus musculus GN=Tpd52l2 PE=2 SV=1;tr|A2AUD5|A2AUD5_MOUSE Tumor protein D54 OS=Mus musculus GN=Tpd	5594800000	3733500000	4045000000	955240000	399630000	266680000	288930000	4854600000	4637800000	5410000000	11	11	2	58.3	58.3	10.2	22.466	0	108.86	13373000000	57	10	9	10	10	9	10	2	2	2	22	15	20
305	A2AUF7;B0R0S4;Q8VCH5;Q3U6R8	A2AUF7;B0R0S4;Q8VCH5;Q3U6R8	Rab9 effector protein with kelch motifs	Rabepk	tr|A2AUF7|A2AUF7_MOUSE Rab9 effector protein with kelch motifs OS=Mus musculus GN=Rabepk PE=4 SV=1;tr|B0R0S4|B0R0S4_MOUSE Rab9 effector protein with kelch motifs OS=Mus musculus GN=Rabepk PE=4 SV=1;sp|Q8VCH5|RABEK_MOUSE Rab9 effector protein with kelch mot	41328000	44482000	55755000	9437700	2755200	2965500	3717000	49553000	51218000	53965000	2	2	2	8.1	8.1	8.1	34.581	0.00015562	5.4391	141570000	5	1	2	2	1	2	2	1	2	2	1	2	2
306	A2AUK8;B6ZHC9;A2AUK5;A2AUK7;Q9Z2H5-2;Q9Z2H5-3;Q9Z2H5;Q8C8P2;E9PV14;B6ZHC4	A2AUK8;B6ZHC9;A2AUK5;A2AUK7;Q9Z2H5-2;Q9Z2H5-3;Q9Z2H5;Q8C8P2;E9PV14	Band 4.1-like protein 1	Epb4.1l1;Epb41l1	tr|A2AUK8|A2AUK8_MOUSE Band 4.1-like protein 1 OS=Mus musculus GN=Epb4.1l1 PE=1 SV=1;tr|B6ZHC9|B6ZHC9_MOUSE Erythrocyte protein band 4.1-like 1 OS=Mus musculus GN=Epb4.1l1 PE=2 SV=1;tr|A2AUK5|A2AUK5_MOUSE Band 4.1-like protein 1 OS=Mus musculus GN=Epb4.1l1	1209100000	1457800000	1541400000	82515000	23708000	28584000	30223000	1498400000	1488300000	1532600000	23	22	4	37.1	35.8	7.3	96.852	0	73.175	4208300000	64	15	20	17	14	19	16	3	3	3	21	21	22
307	A2AUM1;A2AUM0;Q9QZ05-3;Q9QZ05;A2AUM2;Q9QZ05-2;Q9QZ05-4;A2AUL9;Q9QZ05-6;Q9QZ05-5	A2AUM1;A2AUM0;Q9QZ05-3;Q9QZ05;A2AUM2;Q9QZ05-2;Q9QZ05-4	Eukaryotic translation initiation factor 2-alpha kinase 4	Eif2ak4	tr|A2AUM1|A2AUM1_MOUSE Eukaryotic translation initiation factor 2-alpha kinase 4 OS=Mus musculus GN=Eif2ak4 PE=4 SV=1;tr|A2AUM0|A2AUM0_MOUSE Eukaryotic translation initiation factor 2-alpha kinase 4 OS=Mus musculus GN=Eif2ak4 PE=4 SV=1;sp|Q9QZ05-3|E2AK4_MO	507910000	622720000	425650000	18527000	6046600	7413300	5067200	524370000	550540000	568630000	22	22	22	16.1	16.1	16.1	177.9	0	41.014	1556300000	49	15	17	12	15	17	12	15	17	12	17	19	13
308	A2AUM9	A2AUM9	Centrosomal protein of 152 kDa	Cep152	sp|A2AUM9|CE152_MOUSE Centrosomal protein of 152 kDa OS=Mus musculus GN=Cep152 PE=1 SV=1	0	31150000	0	263980	0	263980	0	0	28022000	0	1	1	1	0.9	0.9	0.9	196.53	0.0041076	2.0192	31150000	1	0	1	0	0	1	0	0	1	0	0	1	0
309	A2AUT3;Q3UA16;Q3UA16-3;A2AUT1;A2AUT4;Q3UA16-2	A2AUT3;Q3UA16;Q3UA16-3;A2AUT1;A2AUT4;Q3UA16-2	Kinetochore protein Spc25	Spc25	tr|A2AUT3|A2AUT3_MOUSE Kinetochore protein Spc25 (Fragment) OS=Mus musculus GN=Spc25 PE=4 SV=1;sp|Q3UA16|SPC25_MOUSE Kinetochore protein Spc25 OS=Mus musculus GN=Spc25 PE=2 SV=1;sp|Q3UA16-3|SPC25_MOUSE Isoform 3 of Kinetochore protein Spc25 OS=Mus musculus	99815000	82686000	55346000	26427000	11091000	9187300	6149500	100550000	62045000	77558000	4	4	4	24	24	24	19.603	0	8.284	237850000	5	3	3	1	3	3	1	3	3	1	2	2	1
310	F6RK07;A2AUX5;A2AUX3;B7ZD29;Q3U2G7;Q3UHC7-2;Q3UHC7-4;Q3UHC7-3;Q3UHC7;Q52KF5;F6QQP6	F6RK07;A2AUX5;A2AUX3;B7ZD29;Q3U2G7;Q3UHC7-2;Q3UHC7-4;Q3UHC7-3;Q3UHC7;Q52KF5;F6QQP6	Disabled homolog 2-interacting protein	Dab2ip	tr|F6RK07|F6RK07_MOUSE Disabled homolog 2-interacting protein (Fragment) OS=Mus musculus GN=Dab2ip PE=4 SV=1;tr|A2AUX5|A2AUX5_MOUSE Disabled homolog 2-interacting protein OS=Mus musculus GN=Dab2ip PE=4 SV=1;tr|A2AUX3|A2AUX3_MOUSE Disabled homolog 2-interac	163640000	301370000	257340000	9895200	2241600	4128300	3525200	205330000	238600000	350060000	10	10	10	17.2	17.2	17.2	119.53	0	42.118	722350000	17	3	6	7	3	6	7	3	6	7	4	6	7
311	A2AUX8;Q9D0I6;A2AUY0;F6R860	A2AUX8;Q9D0I6;A2AUY0;F6R860	WD repeat, SAM and U-box domain-containing protein 1	Wdsub1	tr|A2AUX8|A2AUX8_MOUSE WD repeat, SAM and U-box domain-containing protein 1 OS=Mus musculus GN=Wdsub1 PE=4 SV=1;sp|Q9D0I6|WSDU1_MOUSE WD repeat, SAM and U-box domain-containing protein 1 OS=Mus musculus GN=Wdsub1 PE=2 SV=1;tr|A2AUY0|A2AUY0_MOUSE WD repeat,	0	33037000	85136000	5908600	0	1651800	4256800	0	83639000	74172000	2	2	2	6.6	6.6	6.6	45.592	0.00014582	3.8553	118170000	3	0	1	2	0	1	2	0	1	2	0	1	2
312	A2AUY4;B9EKB5;Q69ZI8;Q3UGV3;Q8C0K4;A0PJF0	A2AUY4;B9EKB5;Q69ZI8		Baz2b	tr|A2AUY4|A2AUY4_MOUSE Protein Baz2b OS=Mus musculus GN=Baz2b PE=4 SV=1;tr|B9EKB5|B9EKB5_MOUSE Baz2b protein OS=Mus musculus GN=Baz2b PE=2 SV=1;tr|Q69ZI8|Q69ZI8_MOUSE MKIAA1476 protein (Fragment) OS=Mus musculus GN=Baz2b PE=2 SV=1	131590000	138780000	94040000	3470600	1253200	1321700	895620	104660000	133050000	175730000	12	12	12	10	10	10	234	0	17.611	364410000	17	6	7	4	6	7	4	6	7	4	7	6	4
313	A2AVJ7;Q99PL5;Q6ZPS0;Q99PL5-10;Q99PL5-9;Q99PL5-8;Q99PL5-7;Q99PL5-6;Q99PL5-5;Q99PL5-4;Q99PL5-3;Q99PL5-2;Q99PL5-11;Q99PL5-12;Q8C7E8;Q8CAB9;Q3ULC0;Q3T9Z9-4	A2AVJ7;Q99PL5;Q6ZPS0	Ribosome-binding protein 1	Rrbp1	tr|A2AVJ7|A2AVJ7_MOUSE Ribosome-binding protein 1 OS=Mus musculus GN=Rrbp1 PE=1 SV=1;sp|Q99PL5|RRBP1_MOUSE Ribosome-binding protein 1 OS=Mus musculus GN=Rrbp1 PE=1 SV=2;tr|Q6ZPS0|Q6ZPS0_MOUSE MKIAA1398 protein (Fragment) OS=Mus musculus GN=Rrbp1 PE=2 SV=1	26705000000	23870000000	22362000000	628760000	230210000	205770000	192780000	24368000000	24918000000	24244000000	53	53	53	39.4	39.4	39.4	158.39	0	323.31	72936000000	281	46	48	49	46	48	49	46	48	49	100	88	93
314	A2AVP4;Q148V5;Q148V4;P0C090	A2AVP4;Q148V5;Q148V4;P0C090	Roquin-2	Rc3h2	tr|A2AVP4|A2AVP4_MOUSE Roquin-2 OS=Mus musculus GN=Rc3h2 PE=4 SV=1;tr|Q148V5|Q148V5_MOUSE Ring finger and CCCH-type zinc finger domains 2 OS=Mus musculus GN=Rc3h2 PE=2 SV=1;tr|Q148V4|Q148V4_MOUSE Ring finger and CCCH-type zinc finger domains 2 OS=Mus muscu	66447000	56243000	0	1978900	1071700	907140	0	62298000	83346000	0	5	3	3	8.4	5.9	5.9	124.71	0.00015888	5.9861	122690000	5	4	3	0	3	2	0	3	2	0	3	2	0
315	A2AVQ9;Q8C2G3;Q3UZC4;Q8R3H9;Q9CSK1;A2AVR1;Q05AH4	A2AVQ9;Q8C2G3;Q3UZC4;Q8R3H9;Q9CSK1;A2AVR1	Tetratricopeptide repeat protein 4	Ttc4	tr|A2AVQ9|A2AVQ9_MOUSE Tetratricopeptide repeat protein 4 OS=Mus musculus GN=Ttc4 PE=4 SV=1;tr|Q8C2G3|Q8C2G3_MOUSE Putative uncharacterized protein OS=Mus musculus GN=Ttc4 PE=2 SV=1;tr|Q3UZC4|Q3UZC4_MOUSE Putative uncharacterized protein OS=Mus musculus GN	206820000	132080000	28801000	20428000	11490000	7337800	1600100	209940000	0	0	4	4	4	18.9	18.9	18.9	33.052	0	9.0583	367700000	3	2	2	1	2	2	1	2	2	1	2	1	0
316	B2RRC5;A2AWA9;A2AWA9-2;A2AWA7;A2AWA9-3;A2AWB0	B2RRC5;A2AWA9;A2AWA9-2	Rab GTPase-activating protein 1	Rabgap1	tr|B2RRC5|B2RRC5_MOUSE RAB GTPase activating protein 1 OS=Mus musculus GN=Rabgap1 PE=2 SV=1;sp|A2AWA9|RBGP1_MOUSE Rab GTPase-activating protein 1 OS=Mus musculus GN=Rabgap1 PE=1 SV=1;sp|A2AWA9-2|RBGP1_MOUSE Isoform 2 of Rab GTPase-activating protein 1 OS=M	1805300000	3353300000	2259000000	112390000	27353000	50807000	34227000	2232200000	2708600000	2803000000	39	39	35	42.4	42.4	38.4	120.8	0	150.73	7417600000	90	27	33	22	27	33	22	24	29	20	29	33	28
317	A2AWF8;A2AWF9;E9Q4S7;Q64455;Q61373;Q3V2L7	A2AWF8;A2AWF9;E9Q4S7;Q64455	Protein-tyrosine-phosphatase;Receptor-type tyrosine-protein phosphatase eta	Ptprj	tr|A2AWF8|A2AWF8_MOUSE Receptor-type tyrosine-protein phosphatase eta OS=Mus musculus GN=Ptprj PE=4 SV=1;tr|A2AWF9|A2AWF9_MOUSE Receptor-type tyrosine-protein phosphatase eta OS=Mus musculus GN=Ptprj PE=4 SV=1;tr|E9Q4S7|E9Q4S7_MOUSE Receptor-type tyrosine-	309020000	188140000	190480000	12279000	5518100	3359600	3401400	287060000	232840000	267130000	9	9	9	11.6	11.6	11.6	128.71	0	19.949	687630000	26	8	7	6	8	7	6	8	7	6	9	9	8
318	A2AWJ3;Q9JMF7	A2AWJ3;Q9JMF7	Dolichyldiphosphatase 1	Dolpp1	tr|A2AWJ3|A2AWJ3_MOUSE Dolichyl pyrophosphate phosphatase 1, isoform CRA_b OS=Mus musculus GN=Dolpp1 PE=4 SV=1;sp|Q9JMF7|DOPP1_MOUSE Dolichyldiphosphatase 1 OS=Mus musculus GN=Dolpp1 PE=2 SV=1	70430000	40577000	13743000	12475000	7043000	4057700	1374300	36138000	41028000	50202000	2	2	2	12.3	12.3	12.3	22.186	0.00014702	4.0883	124750000	5	2	2	1	2	2	1	2	2	1	2	2	1
319	H7BX50;E9QLG3;A2AWL7;A2AWL7-3;A2AWL7-2;A2AWL7-4	H7BX50;E9QLG3;A2AWL7;A2AWL7-3;A2AWL7-2	MAX gene-associated protein	Mga	tr|H7BX50|H7BX50_MOUSE MAX gene-associated protein OS=Mus musculus GN=Mga PE=4 SV=1;tr|E9QLG3|E9QLG3_MOUSE MAX gene-associated protein OS=Mus musculus GN=Mga PE=4 SV=1;sp|A2AWL7|MGAP_MOUSE MAX gene-associated protein OS=Mus musculus GN=Mga PE=2 SV=1;sp|A2A	114100000	94212000	116420000	1877000	659510	544580	672940	112960000	95119000	111910000	9	9	9	4.8	4.8	4.8	312.13	0	12.064	324730000	21	7	4	6	7	4	6	7	4	6	7	6	8
320	A2AWN8;P59326;Q3TH60;Q3U8D6;Q8BUI8	A2AWN8;P59326;Q3TH60	YTH domain-containing family protein 1	Ythdf1	tr|A2AWN8|A2AWN8_MOUSE YTH domain family 1, isoform CRA_a OS=Mus musculus GN=Ythdf1 PE=4 SV=1;sp|P59326|YTHD1_MOUSE YTH domain-containing family protein 1 OS=Mus musculus GN=Ythdf1 PE=2 SV=1;tr|Q3TH60|Q3TH60_MOUSE Putative uncharacterized protein (Fragment	700810000	483890000	736270000	83520000	30470000	21039000	32012000	612040000	712900000	740390000	14	8	8	31.7	20.1	20.1	63.899	0	26.171	1921000000	16	10	11	11	5	5	6	5	5	6	5	5	6
321	A2AWP6;A2AWP8-3;A2AWP8-2;A2AWP8-4;A2AWP8;A2AWP8-5;A2AWP4;F6S3V7;Q922V5;A4FUT6;F6ZH54	A2AWP6;A2AWP8-3;A2AWP8-2;A2AWP8-4;A2AWP8;A2AWP8-5	Rho guanine nucleotide exchange factor 10-like protein	Arhgef10l	tr|A2AWP6|A2AWP6_MOUSE Rho guanine nucleotide exchange factor 10-like protein OS=Mus musculus GN=Arhgef10l PE=4 SV=1;sp|A2AWP8-3|ARGAL_MOUSE Isoform 3 of Rho guanine nucleotide exchange factor 10-like protein OS=Mus musculus GN=Arhgef10l;sp|A2AWP8-2|ARGAL_	138730000	187160000	136390000	8889900	2667900	3599100	2622900	163820000	206020000	155090000	10	9	9	13.3	13.3	13.3	113.98	0	11.589	462280000	15	7	8	5	6	7	4	6	7	4	6	6	3
322	A2AWS5;B7ZDF7;Q6P9T4;Q3UJF1;Q3U2E0;B7ZDF5;Q9Z2V6;Q80TW3;B7ZDF4;Q3TSM2;Q99N13-2;Q99N13-3;Q99N13	A2AWS5;B7ZDF7;Q6P9T4;Q3UJF1;Q3U2E0;B7ZDF5;Q9Z2V6;Q80TW3	Histone deacetylase;Histone deacetylase 5	Hdac5	tr|A2AWS5|A2AWS5_MOUSE Histone deacetylase 5 OS=Mus musculus GN=Hdac5 PE=4 SV=1;tr|B7ZDF7|B7ZDF7_MOUSE Histone deacetylase 5 OS=Mus musculus GN=Hdac5 PE=4 SV=1;tr|Q6P9T4|Q6P9T4_MOUSE Histone deacetylase 5 OS=Mus musculus GN=Hdac5 PE=2 SV=1;tr|Q3UJF1|Q3UJF1	30122000	109860000	145060000	5589100	590630	2154200	2844200	63030000	128080000	104640000	6	6	6	14.3	14.3	14.3	111.46	0	6.9228	285040000	11	2	4	5	2	4	5	2	4	5	2	4	5
323	F6RCN9;Z4YN62;A2AWT3;A2AWT3-2	F6RCN9;Z4YN62;A2AWT3;A2AWT3-2	Ataxin-7-like protein 3	Atxn7l3	tr|F6RCN9|F6RCN9_MOUSE Ataxin-7-like protein 3 (Fragment) OS=Mus musculus GN=Atxn7l3 PE=4 SV=1;tr|Z4YN62|Z4YN62_MOUSE Ataxin-7-like protein 3 (Fragment) OS=Mus musculus GN=Atxn7l3 PE=3 SV=1;sp|A2AWT3|AT7L3_MOUSE Ataxin-7-like protein 3 OS=Mus musculus GN=A	245600000	0	291160000	48797000	22328000	0	26469000	222020000	0	308540000	1	1	1	5.8	5.8	5.8	28.269	0.00014769	4.1847	536770000	1	1	0	1	1	0	1	1	0	1	1	0	0
324	A2AWT5;P25976;Q05DS1;E9Q4A8;G3UZW9	A2AWT5;P25976	Nucleolar transcription factor 1	Ubtf	tr|A2AWT5|A2AWT5_MOUSE Nucleolar transcription factor 1 OS=Mus musculus GN=Ubtf PE=4 SV=1;sp|P25976|UBF1_MOUSE Nucleolar transcription factor 1 OS=Mus musculus GN=Ubtf PE=1 SV=1	17933000	11288000	0	621710	381550	240160	0	17933000	10829000	0	21	1	1	28.7	1	1	89.478	0.0073978	1.689	29221000	2	17	16	16	1	1	0	1	1	0	1	1	0
325	A2AWT6;Q9DBH1;A2AWT7;P25976-2	A2AWT6;Q9DBH1;A2AWT7;P25976-2	Nucleolar transcription factor 1	Ubtf	tr|A2AWT6|A2AWT6_MOUSE Nucleolar transcription factor 1 OS=Mus musculus GN=Ubtf PE=4 SV=1;tr|Q9DBH1|Q9DBH1_MOUSE Putative uncharacterized protein OS=Mus musculus GN=Ubtf PE=2 SV=1;tr|A2AWT7|A2AWT7_MOUSE Nucleolar transcription factor 1 OS=Mus musculus GN=U	2982200000	3425600000	2825700000	205190000	66271000	76124000	62793000	3087200000	3243600000	2817400000	21	21	1	30.1	30.1	1.1	85.009	0	270.51	9233500000	72	17	16	16	17	16	16	1	1	0	25	23	24
326	A2AX52	A2AX52	Collagen alpha-4(VI) chain	Col6a4	sp|A2AX52|CO6A4_MOUSE Collagen alpha-4(VI) chain OS=Mus musculus GN=Col6a4 PE=1 SV=2	0	0	0	0	0	0	0	0	0	0	1	1	1	0.3	0.3	0.3	250.8	1	-2	0	0	0	1	0	0	1	0	0	1	0	0	0	0
327	A2BDN9;Q8C5K5;Q8C5K5-2	A2BDN9;Q8C5K5;Q8C5K5-2	Uncharacterized protein CXorf38 homolog	1810030O07Rik	tr|A2BDN9|A2BDN9_MOUSE Uncharacterized protein OS=Mus musculus GN=1810030O07Rik PE=2 SV=1;sp|Q8C5K5|CX038_MOUSE Uncharacterized protein CXorf38 homolog OS=Mus musculus PE=2 SV=1;sp|Q8C5K5-2|CX038_MOUSE Isoform 2 of Uncharacterized protein CXorf38 homolog O	375330000	196290000	224880000	36204000	17060000	8922100	10222000	282810000	240000000	332560000	8	8	8	35.9	35.9	35.9	36.588	0	20.068	796490000	12	6	3	2	6	3	2	6	3	2	6	3	3
328	Q6ZQ47;A2BDX0;Q3UYC8;Q5BL11;Q5RKY4;Q9Z103;Q8BNY2	Q6ZQ47;A2BDX0;Q3UYC8;Q5BL11;Q5RKY4;Q9Z103	Activity-dependent neuroprotector homeobox protein	Adnp	tr|Q6ZQ47|Q6ZQ47_MOUSE MKIAA0784 protein (Fragment) OS=Mus musculus GN=Adnp PE=2 SV=1;tr|A2BDX0|A2BDX0_MOUSE Activity-dependent neuroprotector homeobox protein OS=Mus musculus GN=Adnp PE=1 SV=1;tr|Q3UYC8|Q3UYC8_MOUSE Putative uncharacterized protein OS=Mus	3668900000	3508200000	3045400000	141980000	50957000	48725000	42297000	3400000000	3613400000	3717800000	36	36	36	41.5	41.5	41.5	122.15	0	97.146	10223000000	105	25	31	29	25	31	29	25	31	29	38	34	33
329	A2BDX3;Q14BE0	A2BDX3	Adenylyltransferase and sulfurtransferase MOCS3;Molybdopterin-synthase adenylyltransferase;Molybdopterin-synthase sulfurtransferase	Mocs3	sp|A2BDX3|MOCS3_MOUSE Adenylyltransferase and sulfurtransferase MOCS3 OS=Mus musculus GN=Mocs3 PE=2 SV=1	689580000	1479600000	1191900000	115900000	23779000	51019000	41100000	995150000	1319900000	1240700000	11	11	11	33	33	33	49.374	0	35.262	3361000000	34	6	7	8	6	7	8	6	7	8	11	11	12
330	A2BDY3;Q61060;O70220;Q60688;O35392	A2BDY3;Q61060;O70220;Q60688;O35392	Forkhead box protein D3;Forkhead box protein Q1;Forkhead box protein D4;Forkhead box protein D2	Foxd3;Foxq1;Foxd4;Foxd2	tr|A2BDY3|A2BDY3_MOUSE Forkhead box protein D3 OS=Mus musculus GN=Foxd3 PE=4 SV=1;sp|Q61060|FOXD3_MOUSE Forkhead box protein D3 OS=Mus musculus GN=Foxd3 PE=2 SV=3;sp|O70220|FOXQ1_MOUSE Forkhead box protein Q1 OS=Mus musculus GN=Foxq1 PE=2 SV=3;sp|Q60688|FO	138880000	208930000	116080000	38657000	11573000	17411000	9673300	164330000	133510000	136780000	2	2	1	8.3	8.3	6	46.818	0	8.4041	463880000	7	1	2	1	1	2	1	1	1	1	2	3	2
331	A2BE28-2;A2BE28	A2BE28-2;A2BE28	Ribosomal biogenesis protein LAS1L	Las1l	sp|A2BE28-2|LAS1L_MOUSE Isoform 2 of Ribosomal biogenesis protein LAS1L OS=Mus musculus GN=Las1l;sp|A2BE28|LAS1L_MOUSE Ribosomal biogenesis protein LAS1L OS=Mus musculus GN=Las1l PE=1 SV=1	2118000000	2254400000	1826400000	144160000	49256000	52428000	42474000	2340500000	2178500000	2074700000	18	18	18	34	34	34	87.577	0	119.49	6198800000	56	15	15	13	15	15	13	15	15	13	21	19	16
332	A2BE93;Q5U445;Q3T9S3;Q9EQU5;A2BE92;Q9EQU5-3;Q9CRT3	A2BE93;Q5U445;Q3T9S3;Q9EQU5;A2BE92;Q9EQU5-3	Protein SET	Set;BC085271	tr|A2BE93|A2BE93_MOUSE Protein SET (Fragment) OS=Mus musculus GN=Set PE=1 SV=1;tr|Q5U445|Q5U445_MOUSE cDNA sequence BC085271 OS=Mus musculus GN=BC085271 PE=2 SV=1;tr|Q3T9S3|Q3T9S3_MOUSE SET translocation OS=Mus musculus GN=Set PE=2 SV=1;sp|Q9EQU5|SET_MOUSE	24722000000	24277000000	20833000000	5819300000	2060100000	2023100000	1736100000	25668000000	21201000000	21126000000	13	13	4	59.5	59.5	22.8	24.923	0	216	69831000000	105	13	13	13	13	13	13	4	4	4	37	32	36
333	A2BEF2;Q52KF7;A2BEE9;Q80TH1;P70175	A2BEF2;Q52KF7;A2BEE9;Q80TH1;P70175	Disks large homolog 3	Dlg3	tr|A2BEF2|A2BEF2_MOUSE Disks large homolog 3 OS=Mus musculus GN=Dlg3 PE=1 SV=1;tr|Q52KF7|Q52KF7_MOUSE Disks large homolog 3 OS=Mus musculus GN=Dlg3 PE=1 SV=1;tr|A2BEE9|A2BEE9_MOUSE Disks large homolog 3 OS=Mus musculus GN=Dlg3 PE=1 SV=1;tr|Q80TH1|Q80TH1_MO	1043300000	766080000	904880000	104400000	40128000	29465000	34803000	1208300000	861780000	871000000	12	9	9	31.4	25.4	25.4	57.905	0	36.83	2714300000	29	8	9	9	6	7	6	6	7	6	9	10	10
334	A2BFF7;Q3TPJ8;O88487;A2BFF8;D6Q0F7;A2BFF9;D6Q0F6;D6Q0F5;A2BFF5;Q3UDA2	A2BFF7;Q3TPJ8;O88487;A2BFF8;D6Q0F7;A2BFF9;D6Q0F6;D6Q0F5;A2BFF5;Q3UDA2	Cytoplasmic dynein 1 intermediate chain 2	Dync1i2	tr|A2BFF7|A2BFF7_MOUSE Dynein cytoplasmic 1 intermediate chain 2 OS=Mus musculus GN=Dync1i2 PE=2 SV=1;tr|Q3TPJ8|Q3TPJ8_MOUSE Cytoplasmic dynein 1 intermediate chain 2 OS=Mus musculus GN=Dync1i2 PE=1 SV=1;sp|O88487|DC1I2_MOUSE Cytoplasmic dynein 1 intermedi	4808600000	4007800000	3633700000	541310000	209070000	174250000	157990000	4733900000	4177100000	4080000000	17	17	17	52.1	52.1	52.1	68.393	0	149.71	12450000000	87	14	14	16	14	14	16	14	14	16	29	29	29
335	A2BFG8	A2BFG8		Etohi1	tr|A2BFG8|A2BFG8_MOUSE Protein Etohi1 OS=Mus musculus GN=Etohi1 PE=4 SV=1	0	29463000	0	892820	0	892820	0	0	28842000	0	2	2	2	5.1	5.1	5.1	54.11	0.00014599	3.8831	29463000	2	0	2	0	0	2	0	0	2	0	0	2	0
336	Q8C434;Q6GSP7;A2BG76;I7HIP8;A2BG75;A2BG77;P97863-3;P97863-2;P97863;Q8BN68;Q3UFE1;A2ADI3;J3JS90	Q8C434;Q6GSP7;A2BG76;I7HIP8;A2BG75;A2BG77;P97863-3;P97863-2;P97863;Q8BN68;Q3UFE1;A2ADI3;J3JS90	Nuclear factor 1;Nuclear factor 1 B-type	Nfib	tr|Q8C434|Q8C434_MOUSE Nuclear factor 1 OS=Mus musculus GN=Nfib PE=2 SV=1;tr|Q6GSP7|Q6GSP7_MOUSE Nuclear factor 1 OS=Mus musculus GN=Nfib PE=2 SV=1;tr|A2BG76|A2BG76_MOUSE Nuclear factor 1 OS=Mus musculus GN=Nfib PE=1 SV=1;tr|I7HIP8|I7HIP8_MOUSE Nuclear fac	1110800000	1042700000	999320000	157640000	55539000	52135000	49966000	1180100000	1194700000	1022300000	8	8	7	26.2	26.2	23.8	47.53	0	42.469	3152800000	33	7	7	7	7	7	7	6	6	6	14	9	10
337	A2BGN7;Q9D8X0	A2BGN7;Q9D8X0	Protein MANBAL	Manbal	tr|A2BGN7|A2BGN7_MOUSE Protein MANBAL OS=Mus musculus GN=Manbal PE=4 SV=1;sp|Q9D8X0|MANBL_MOUSE Protein MANBAL OS=Mus musculus GN=Manbal PE=2 SV=2	347110000	361810000	315040000	204790000	69421000	72362000	63009000	310830000	387080000	351580000	2	2	2	40	40	40	9.3679	0	8.6341	1024000000	12	2	2	2	2	2	2	2	2	2	6	3	3
338	A2BI12;Q05CD2;Q99JF8-2;F6RB63	A2BI12;Q05CD2;Q99JF8-2	PC4 and SFRS1-interacting protein	Psip1	tr|A2BI12|A2BI12_MOUSE PC4 and SFRS1-interacting protein OS=Mus musculus GN=Psip1 PE=1 SV=1;tr|Q05CD2|Q05CD2_MOUSE Psip1 protein (Fragment) OS=Mus musculus GN=Psip1 PE=2 SV=1;sp|Q99JF8-2|PSIP1_MOUSE Isoform 2 of PC4 and SFRS1-interacting protein OS=Mus mus	89191000	61801000	69486000	11604000	4694300	3252700	3657200	89191000	59290000	74717000	16	1	1	49.5	4	4	36.968	0.0057374	1.7604	220480000	3	15	15	13	1	1	1	1	1	1	1	1	1
339	Q920G6;A2BI31;O55186	Q920G6;A2BI31;O55186	CD59A glycoprotein	CD59A;Cd59a	tr|Q920G6|Q920G6_MOUSE CD59A OS=Mus musculus GN=CD59A PE=4 SV=1;tr|A2BI31|A2BI31_MOUSE CD59a antigen OS=Mus musculus GN=Cd59a PE=2 SV=1;sp|O55186|CD59A_MOUSE CD59A glycoprotein OS=Mus musculus GN=Cd59a PE=2 SV=1	24993000	0	14183000	9794100	6248400	0	3545700	29551000	0	0	2	2	2	21.1	21.1	21.1	13.674	0.00015596	5.4811	39176000	2	1	0	1	1	0	1	1	0	1	1	0	1
340	Q3UR75;A2BIE1;Q8C5D6	Q3UR75;A2BIE1		Qser1	tr|Q3UR75|Q3UR75_MOUSE Putative uncharacterized protein (Fragment) OS=Mus musculus GN=Qser1 PE=2 SV=1;tr|A2BIE1|A2BIE1_MOUSE Protein Qser1 OS=Mus musculus GN=Qser1 PE=4 SV=2	63641000	25578000	29155000	1909300	1026500	412550	470240	42156000	41680000	35900000	5	5	5	7.3	7.3	7.3	132.88	0	13.352	118370000	8	3	2	2	3	2	2	3	2	2	4	2	2
341	A2CG35;P35283	A2CG35;P35283	Ras-related protein Rab-12	Rab12	tr|A2CG35|A2CG35_MOUSE Ras-related protein Rab-12 OS=Mus musculus GN=Rab12 PE=1 SV=1;sp|P35283|RAB12_MOUSE Ras-related protein Rab-12 OS=Mus musculus GN=Rab12 PE=1 SV=3	839500000	988050000	469130000	114830000	41975000	49403000	23456000	908330000	804220000	526330000	10	10	10	35.1	35.1	35.1	32.238	0	16.245	2296700000	25	6	10	6	6	10	6	6	10	6	7	10	8
342	B1B1A7;F6QYT9;A2CG49-9;A2CG49-8;A2CG49-2;A2CG49;A2CG49-7;D3Z560;D3Z559;A2CG49-5	B1B1A7;F6QYT9;A2CG49-9;A2CG49-8;A2CG49-2;A2CG49;A2CG49-7;D3Z560;D3Z559;A2CG49-5	Kalirin	Kalrn	tr|B1B1A7|B1B1A7_MOUSE Kalirin (Fragment) OS=Mus musculus GN=Kalrn PE=4 SV=1;tr|F6QYT9|F6QYT9_MOUSE Kalirin (Fragment) OS=Mus musculus GN=Kalrn PE=1 SV=1;sp|A2CG49-9|KALRN_MOUSE Isoform 9 of Kalirin OS=Mus musculus GN=Kalrn;sp|A2CG49-8|KALRN_MOUSE Isoform	75132000	70807000	0	1716900	883910	833020	0	67719000	56926000	0	6	1	1	4.6	0.9	0.9	161.76	0.0016315	2.4611	145940000	2	3	5	3	1	1	0	1	1	0	1	1	0
343	A2CG63-2;A2CG63;Z4YL44;Z4YMH1;Q8BV50;Q8BYB0;Q8BXV6;Q3TR72;F6R6U0	A2CG63-2;A2CG63;Z4YL44;Z4YMH1	AT-rich interactive domain-containing protein 4B	Arid4b	sp|A2CG63-2|ARI4B_MOUSE Isoform 2 of AT-rich interactive domain-containing protein 4B OS=Mus musculus GN=Arid4b;sp|A2CG63|ARI4B_MOUSE AT-rich interactive domain-containing protein 4B OS=Mus musculus GN=Arid4b PE=1 SV=1;tr|Z4YL44|Z4YL44_MOUSE AT-rich intera	144780000	352140000	92989000	9075500	2227300	5417500	1430600	225910000	222380000	120430000	10	10	10	11.7	11.7	11.7	137.32	0	19.274	589910000	14	5	5	6	5	5	6	5	5	6	4	5	5
344	A2JY27;Q9JJJ0;Q91WD2	A2JY27;Q9JJJ0;Q91WD2	Transient receptor potential cation channel subfamily V member 6	Trpv6	tr|A2JY27|A2JY27_MOUSE Epithelial calcium channel 2 OS=Mus musculus GN=Trpv6 PE=4 SV=1;tr|Q9JJJ0|Q9JJJ0_MOUSE Calcium transporting protein homolog OS=Mus musculus GN=Trpv6 PE=2 SV=1;sp|Q91WD2|TRPV6_MOUSE Transient receptor potential cation channel subfamil	0	0	0	0	0	0	0	0	0	0	1	1	1	1.5	1.5	1.5	83.194	1	-2	0	0	0	1	0	0	1	0	0	1	0	0	0	0
345	A2RRI8;Q8CF93;Q8CF93-2;B1AY79	A2RRI8;Q8CF93;Q8CF93-2	Polypeptide N-acetylgalactosaminyltransferase;Polypeptide N-acetylgalactosaminyltransferase 13	Galnt13	tr|A2RRI8|A2RRI8_MOUSE Galnt13 protein OS=Mus musculus GN=Galnt13 PE=2 SV=1;sp|Q8CF93|GLT13_MOUSE Polypeptide N-acetylgalactosaminyltransferase 13 OS=Mus musculus GN=Galnt13 PE=2 SV=1;sp|Q8CF93-2|GLT13_MOUSE Isoform 2 of Polypeptide N-acetylgalactosaminylt	0	0	0	0	0	0	0	0	0	0	3	1	1	7	2.9	2.9	63.982	1	-2	0	0	2	1	2	1	0	0	1	0	0	0	0	0
346	F6ZBL2;A2RRJ6;Q80SY4;Q3TSS1;F6YFW9	F6ZBL2;A2RRJ6;Q80SY4	E3 ubiquitin-protein ligase MIB1	Mib1	tr|F6ZBL2|F6ZBL2_MOUSE E3 ubiquitin-protein ligase MIB1 (Fragment) OS=Mus musculus GN=Mib1 PE=4 SV=1;tr|A2RRJ6|A2RRJ6_MOUSE Mib1 protein OS=Mus musculus GN=Mib1 PE=2 SV=1;sp|Q80SY4|MIB1_MOUSE E3 ubiquitin-protein ligase MIB1 OS=Mus musculus GN=Mib1 PE=1 SV	433470000	527750000	365030000	34901000	11407000	13888000	9605900	388490000	437150000	476050000	9	9	9	22.9	22.9	22.9	69.637	0	19.228	1326200000	29	4	7	5	4	7	5	4	7	5	10	11	8
347	A2RRK3;O54988-2;O54988;Q3TRK8;G3X8V6;B9EHD2;O70458-2;O70458	A2RRK3;O54988-2;O54988	STE20-like serine/threonine-protein kinase	Slk	tr|A2RRK3|A2RRK3_MOUSE Slk protein OS=Mus musculus GN=Slk PE=2 SV=1;sp|O54988-2|SLK_MOUSE Isoform 2 of STE20-like serine/threonine-protein kinase OS=Mus musculus GN=Slk;sp|O54988|SLK_MOUSE STE20-like serine/threonine-protein kinase OS=Mus musculus GN=Slk P	3183400000	4462600000	4082200000	167550000	45477000	63752000	58318000	3532600000	3902800000	4226500000	39	39	37	49.8	49.8	48.2	137.71	0	225.59	11728000000	107	25	31	29	25	31	29	23	30	28	32	36	39
348	A2RRR0;A3KMG9;Z4YJC9;Q6T3U4	A2RRR0;A3KMG9;Z4YJC9;Q6T3U4	Niemann-Pick C1-like protein 1	Npc1l1	tr|A2RRR0|A2RRR0_MOUSE Npc1l1 protein OS=Mus musculus GN=Npc1l1 PE=2 SV=1;tr|A3KMG9|A3KMG9_MOUSE Npc1l1 protein (Fragment) OS=Mus musculus GN=Npc1l1 PE=2 SV=1;tr|Z4YJC9|Z4YJC9_MOUSE NPC1-like 1 OS=Mus musculus GN=Npc1l1 PE=4 SV=1;sp|Q6T3U4|NPCL1_MOUSE Niem	0	134170000	123900000	9217100	0	4791900	4425200	0	129670000	132200000	1	1	1	1.1	1.1	1.1	79.971	0.0041081	2.0195	258080000	2	0	1	1	0	1	1	0	1	1	0	1	1
349	A2RS22;Q9WUM3;D3YUG6	A2RS22;Q9WUM3	Coronin;Coronin-1B	Coro1b	tr|A2RS22|A2RS22_MOUSE Coronin OS=Mus musculus GN=Coro1b PE=2 SV=1;sp|Q9WUM3|COR1B_MOUSE Coronin-1B OS=Mus musculus GN=Coro1b PE=1 SV=1	6013300000	6392200000	4965400000	755260000	261450000	277920000	215890000	6080000000	6098600000	5651700000	15	15	15	43	43	43	53.912	0	139.69	17371000000	83	12	14	13	12	14	13	12	14	13	29	26	28
350	A2RS23;Q11136;G3UXC5	A2RS23;Q11136	Xaa-Pro dipeptidase	Pepd	tr|A2RS23|A2RS23_MOUSE Peptidase D OS=Mus musculus GN=Pepd PE=2 SV=1;sp|Q11136|PEPD_MOUSE Xaa-Pro dipeptidase OS=Mus musculus GN=Pepd PE=2 SV=3	3292300000	2732600000	2978900000	321560000	117580000	97592000	106390000	3091700000	3242000000	3505700000	17	17	17	38.9	38.9	38.9	55.028	0	112.76	9003800000	55	12	15	16	12	15	16	12	15	16	16	19	20
351	Q3USI1;Q3TVS7;O88185;A2RS43;E9Q2S0;Q2TJI4;Q2TJI5;Q2TJI6;Q8CA35	Q3USI1;Q3TVS7;O88185;A2RS43;E9Q2S0		Pcdh7	tr|Q3USI1|Q3USI1_MOUSE Putative uncharacterized protein OS=Mus musculus GN=Pcdh7 PE=2 SV=1;tr|Q3TVS7|Q3TVS7_MOUSE Putative uncharacterized protein OS=Mus musculus GN=Pcdh7 PE=2 SV=1;tr|O88185|O88185_MOUSE BH-protocadherin-a OS=Mus musculus GN=Pcdh7 PE=2 SV	46555000	74161000	260260000	7470100	912850	1454100	5103100	59930000	120000000	242080000	7	7	7	11.5	11.5	11.5	116.23	0	22.843	380980000	11	2	4	5	2	4	5	2	4	5	2	4	5
352	Q8C1Z9;F6V6T4;A2RS53;Q9R0Q3;Q3U9H7;Q3THL1;Q8BPI2	Q8C1Z9;F6V6T4;A2RS53;Q9R0Q3;Q3U9H7;Q3THL1;Q8BPI2	Transmembrane emp24 domain-containing protein 2	Tmed2	tr|Q8C1Z9|Q8C1Z9_MOUSE Putative uncharacterized protein OS=Mus musculus PE=2 SV=1;tr|F6V6T4|F6V6T4_MOUSE Transmembrane emp24 domain-containing protein 2 (Fragment) OS=Mus musculus GN=Tmed2 PE=3 SV=1;tr|A2RS53|A2RS53_MOUSE Transmembrane emp24 domain traffic	4530900000	5965400000	4626400000	1512300000	453090000	596540000	462640000	5322000000	5632000000	4923400000	7	7	7	47.2	47.2	47.2	18.262	0	27.435	15123000000	77	6	7	6	6	7	6	6	7	6	28	25	24
353	A2RS58;P47941;Q8R5B8	A2RS58;P47941	Crk-like protein	Crkl	tr|A2RS58|A2RS58_MOUSE V-crk sarcoma virus CT10 oncogene homolog (Avian)-like OS=Mus musculus GN=Crkl PE=2 SV=1;sp|P47941|CRKL_MOUSE Crk-like protein OS=Mus musculus GN=Crkl PE=1 SV=2	1686200000	1644600000	1521400000	255380000	88749000	86558000	80071000	1629000000	1810600000	1610800000	11	11	11	48.5	48.5	48.5	33.83	0	35.242	4852200000	39	9	9	8	9	9	8	9	9	8	14	12	13
354	A2RS68;Q62376;Q9CR32;Q6ZWP0;Q62376-2;Q7TT81;Q99LY5	A2RS68;Q62376;Q9CR32;Q6ZWP0;Q62376-2;Q7TT81	U1 small nuclear ribonucleoprotein 70 kDa	Snrnp70	tr|A2RS68|A2RS68_MOUSE Small nuclear ribonucleoprotein 70 (U1) OS=Mus musculus GN=Snrnp70 PE=2 SV=1;sp|Q62376|RU17_MOUSE U1 small nuclear ribonucleoprotein 70 kDa OS=Mus musculus GN=Snrnp70 PE=1 SV=2;tr|Q9CR32|Q9CR32_MOUSE Putative uncharacterized protein	6438400000	7880900000	6530500000	1097400000	338870000	414790000	343710000	6637700000	6511900000	7386700000	18	18	18	46.2	46.2	46.2	51.991	0	75.41	20850000000	69	14	15	11	14	15	11	14	15	11	25	20	24
355	Q8VCE7;A2RS96;Q9CXE7;Q3TW73;E9PXY3;Q3U9T7;D3Z615;Q8C5H9;Q3V440;E9Q2J2;Q8C954	Q8VCE7;A2RS96;Q9CXE7;Q3TW73;E9PXY3;Q3U9T7;D3Z615;Q8C5H9;Q3V440;E9Q2J2	Transmembrane emp24 domain-containing protein 5	Tmed5	tr|Q8VCE7|Q8VCE7_MOUSE Transmembrane emp24 protein transport domain containing 5 OS=Mus musculus GN=Tmed5 PE=2 SV=1;tr|A2RS96|A2RS96_MOUSE Transmembrane emp24 protein transport domain containing 5 OS=Mus musculus GN=Tmed5 PE=2 SV=1;sp|Q9CXE7|TMED5_MOUSE Tr	1534900000	1406500000	1118100000	312270000	118070000	108190000	86007000	1423700000	1280100000	1337400000	6	6	6	30.1	30.1	30.1	26.186	0	11.72	4059500000	19	5	5	6	5	5	6	5	5	6	5	8	6
356	A2RSB1;B7ZNL2;Q8C1W9;Q78ZA7	A2RSB1;B7ZNL2;Q8C1W9;Q78ZA7	Nucleosome assembly protein 1-like 4	Nap1l4	tr|A2RSB1|A2RSB1_MOUSE Nucleosome assembly protein 1-like 4 OS=Mus musculus GN=Nap1l4 PE=2 SV=1;tr|B7ZNL2|B7ZNL2_MOUSE Nap1l4 protein OS=Mus musculus GN=Nap1l4 PE=2 SV=1;tr|Q8C1W9|Q8C1W9_MOUSE Putative uncharacterized protein OS=Mus musculus GN=Nap1l4 PE=2	6164400000	7222700000	4841000000	1012700000	342460000	401260000	268940000	6374300000	6151700000	5559500000	14	12	12	55.2	52.5	52.5	42.679	0	193.36	18228000000	64	14	14	14	12	12	12	12	12	12	23	23	18
357	A2RSE4;P63147	A2RSE4;P63147	Ubiquitin-conjugating enzyme E2 B	Ube2b	tr|A2RSE4|A2RSE4_MOUSE Ubiquitin-conjugating enzyme E2B, RAD6 homology (S. cerevisiae) OS=Mus musculus GN=Ube2b PE=2 SV=1;sp|P63147|UBE2B_MOUSE Ubiquitin-conjugating enzyme E2 B OS=Mus musculus GN=Ube2b PE=1 SV=1	47338000	152830000	16409000	54145000	11834000	38208000	4102300	51242000	108900000	58761000	2	1	1	36.8	11.2	11.2	17.312	0.00014968	4.4488	216580000	5	1	1	2	1	1	1	1	1	1	2	2	1
358	Q3UGT3;A2RSF1;Q8K4M5;F7BCN0;F7BZY0;Q8VI86;G8JL54	Q3UGT3;A2RSF1;Q8K4M5;F7BCN0;F7BZY0;Q8VI86	COMM domain-containing protein 1	Commd1;Gm28048	tr|Q3UGT3|Q3UGT3_MOUSE Putative uncharacterized protein OS=Mus musculus GN=Commd1 PE=2 SV=1;tr|A2RSF1|A2RSF1_MOUSE COMM domain containing 1 OS=Mus musculus GN=Commd1 PE=2 SV=1;sp|Q8K4M5|COMD1_MOUSE COMM domain-containing protein 1 OS=Mus musculus GN=Commd1	509330000	430390000	540350000	246680000	84888000	71731000	90058000	623490000	626400000	424900000	4	4	4	34.8	34.8	34.8	15.35	0	26.658	1480100000	16	3	3	4	3	3	4	3	3	4	5	6	5
359	B1PSD9;B2KF57;B2KF84;A2RSH1;F6QFD1;E9PVU7;Q01063-2;Q01063;A6XDB1;A6XDA7;A6XDB0;A6XDA6;Q01063-3;O70286;Q8BQB2;B1AWD1;Q3TTI9;Q6IQY6;Q91VY2;B1AWD0;B1AWC8;Q9QXI7;Q8VBU5;B1AWC9	B1PSD9;B2KF57;B2KF84;A2RSH1;F6QFD1;E9PVU7;Q01063-2;Q01063;A6XDB1;A6XDA7;A6XDB0;A6XDA6;Q01063-3	cAMP-specific 3,5-cyclic phosphodiesterase 4D	Pde4d	tr|B1PSD9|B1PSD9_MOUSE cAMP-specific 3,5-cyclic phosphodiesterase 4D OS=Mus musculus GN=Pde4d PE=2 SV=1;tr|B2KF57|B2KF57_MOUSE Phosphodiesterase 4D, cAMP specific (Fragment) OS=Mus musculus GN=Pde4d PE=4 SV=1;tr|B2KF84|B2KF84_MOUSE cAMP-specific 3,5-cy	29490000	187850000	69873000	7978100	819180	5218000	1940900	35997000	189550000	54824000	5	5	2	8.3	8.3	3.7	79.113	0	7.0604	287210000	7	1	5	1	1	5	1	1	2	1	1	5	1
360	Q3UVQ0;A2RSH4;Q69ZS6	Q3UVQ0;A2RSH4;Q69ZS6	Synaptic vesicle glycoprotein 2C	Sv2c	tr|Q3UVQ0|Q3UVQ0_MOUSE Putative uncharacterized protein (Fragment) OS=Mus musculus GN=Sv2c PE=2 SV=1;tr|A2RSH4|A2RSH4_MOUSE Sv2c protein OS=Mus musculus GN=Sv2c PE=2 SV=1;sp|Q69ZS6|SV2C_MOUSE Synaptic vesicle glycoprotein 2C OS=Mus musculus GN=Sv2c PE=1 SV	86470000	79909000	39436000	13721000	5764700	5327300	2629000	68917000	65989000	54968000	1	1	1	2.2	2.2	2.2	41.565	1	-2	205810000	3	1	1	1	1	1	1	1	1	1	1	1	1
361	A2RSJ4;Q8C318;Q9D574;Q922V6	A2RSJ4	UHRF1-binding protein 1-like	Uhrf1bp1l	sp|A2RSJ4|UH1BL_MOUSE UHRF1-binding protein 1-like OS=Mus musculus GN=Uhrf1bp1l PE=1 SV=2	436250000	706800000	366920000	16236000	4690900	7600000	3945400	521550000	515810000	521290000	19	19	17	21.6	21.6	20.6	161.94	0	61.229	1510000000	36	10	16	11	10	16	11	8	14	9	11	14	11
362	A2RSL2;Q8BMD7-2;Q8BMD7	A2RSL2;Q8BMD7-2;Q8BMD7	MORC family CW-type zinc finger protein 4	Morc4	tr|A2RSL2|A2RSL2_MOUSE Microrchidia 4 OS=Mus musculus GN=Morc4 PE=2 SV=1;sp|Q8BMD7-2|MORC4_MOUSE Isoform 2 of MORC family CW-type zinc finger protein 4 OS=Mus musculus GN=Morc4;sp|Q8BMD7|MORC4_MOUSE MORC family CW-type zinc finger protein 4 OS=Mus musculus	0	0	0	0	0	0	0	0	0	0	1	1	1	0.8	0.8	0.8	100.6	1	-2	0	0	0	1	1	0	1	1	0	1	1	0	0	0
363	A2RSQ0	A2RSQ0	DENN domain-containing protein 5B	Dennd5b	sp|A2RSQ0|DEN5B_MOUSE DENN domain-containing protein 5B OS=Mus musculus GN=Dennd5b PE=1 SV=2	47145000	39168000	44035000	1945500	703660	584600	657240	38874000	46124000	51177000	6	5	5	8.2	7.6	7.6	144.63	0	11.977	130350000	8	4	4	4	3	3	3	3	3	3	3	2	3
364	A2RSS6;Q64191;B7ZNK6	A2RSS6;Q64191;B7ZNK6	N(4)-(beta-N-acetylglucosaminyl)-L-asparaginase;Glycosylasparaginase alpha chain;Glycosylasparaginase beta chain	Aga	tr|A2RSS6|A2RSS6_MOUSE Aspartylglucosaminidase OS=Mus musculus GN=Aga PE=2 SV=1;sp|Q64191|ASPG_MOUSE N(4)-(beta-N-acetylglucosaminyl)-L-asparaginase OS=Mus musculus GN=Aga PE=2 SV=1;tr|B7ZNK6|B7ZNK6_MOUSE Aga protein OS=Mus musculus GN=Aga PE=2 SV=1	1010400000	1089000000	1019600000	173280000	56132000	60502000	56645000	1154800000	1126100000	917710000	7	7	7	32.9	32.9	32.9	37.022	0	62.481	3119000000	28	4	5	5	4	5	5	4	5	5	9	9	10
365	A2RSV8;P19783;M0QWX7;M0QWX2;D6RG40	A2RSV8;P19783	Cytochrome c oxidase subunit 4 isoform 1, mitochondrial	Cox4i1	tr|A2RSV8|A2RSV8_MOUSE Cytochrome c oxidase subunit IV isoform 1 OS=Mus musculus GN=Cox4i1 PE=2 SV=1;sp|P19783|COX41_MOUSE Cytochrome c oxidase subunit 4 isoform 1, mitochondrial OS=Mus musculus GN=Cox4i1 PE=1 SV=2	6009700000	5454300000	5833300000	1441400000	500810000	454520000	486110000	5719000000	6300800000	7260200000	9	9	9	52.7	52.7	52.7	19.53	0	67.443	17297000000	46	7	9	9	7	9	9	7	9	9	18	11	17
366	A2RSW6;Q8CFA2	A2RSW6;Q8CFA2	Aminomethyltransferase;Aminomethyltransferase, mitochondrial	Amt	tr|A2RSW6|A2RSW6_MOUSE Aminomethyltransferase OS=Mus musculus GN=Amt PE=2 SV=1;sp|Q8CFA2|GCST_MOUSE Aminomethyltransferase, mitochondrial OS=Mus musculus GN=Amt PE=1 SV=1	2879300000	2431000000	2494400000	354750000	130880000	110500000	113380000	2683700000	2777300000	3153900000	15	15	15	51.1	51.1	51.1	44.008	0	97.495	7804600000	79	14	14	14	14	14	14	14	14	14	27	24	28
367	Q8CDQ3;A2RSX4	Q8CDQ3;A2RSX4		4933433C11Rik	tr|Q8CDQ3|Q8CDQ3_MOUSE Protein 4933433C11Rik OS=Mus musculus GN=4933433C11Rik PE=2 SV=1;tr|A2RSX4|A2RSX4_MOUSE 4933433C11Rik protein OS=Mus musculus GN=4933433C11Rik PE=2 SV=1	9701300000	8084500000	10188000000	2151900000	746260000	621890000	783720000	9224100000	8950000000	11313000000	1	1	1	3.6	3.6	3.6	28.338	1	-2	27974000000	10	1	1	1	1	1	1	1	1	1	3	3	4
368	A2RSX7;G3UW53;E0CZH0;A2RSX7-2	A2RSX7;G3UW53	tRNA wybutosine-synthesizing protein 5	Tyw5	sp|A2RSX7|TYW5_MOUSE tRNA wybutosine-synthesizing protein 5 OS=Mus musculus GN=Tyw5 PE=2 SV=2;tr|G3UW53|G3UW53_MOUSE RIKEN cDNA 1110034B05, isoform CRA_c (Fragment) OS=Mus musculus GN=Tyw5 PE=4 SV=1	52669000	81772000	85573000	11001000	2633500	4088600	4278600	78413000	60816000	0	4	4	4	23.2	23.2	23.2	36.632	0	8.3774	220010000	7	1	2	3	1	2	3	1	2	3	1	2	4
369	A2RSY1-3;A2RSY1-2;A2RSY1	A2RSY1-3;A2RSY1-2;A2RSY1	KAT8 regulatory NSL complex subunit 3	Kansl3	sp|A2RSY1-3|KANL3_MOUSE Isoform 3 of KAT8 regulatory NSL complex subunit 3 OS=Mus musculus GN=Kansl3;sp|A2RSY1-2|KANL3_MOUSE Isoform 2 of KAT8 regulatory NSL complex subunit 3 OS=Mus musculus GN=Kansl3;sp|A2RSY1|KANL3_MOUSE KAT8 regulatory NSL complex subu	104040000	72140000	127640000	7410300	2537600	1759500	3113200	97821000	112830000	117200000	6	6	6	13	13	13	82.031	0	23.167	303820000	13	4	2	4	4	2	4	4	2	4	5	3	5
370	A2RSY6;A2RSY6-2;A2RSY6-3	A2RSY6;A2RSY6-2	TRMT1-like protein	Trmt1l	sp|A2RSY6|TRM1L_MOUSE TRMT1-like protein OS=Mus musculus GN=Trmt1l PE=2 SV=1;sp|A2RSY6-2|TRM1L_MOUSE Isoform 2 of TRMT1-like protein OS=Mus musculus GN=Trmt1l	1248300000	1267500000	1360600000	82478000	26560000	26968000	28950000	1534400000	1370400000	1294000000	19	19	19	37	37	37	80.86	0	98.552	3876500000	53	11	13	16	11	13	16	11	13	16	14	18	21
371	A2RT05;P27545	A2RT05;P27545	Ceramide synthase 1	Lass1;Cers1	tr|A2RT05|A2RT05_MOUSE LAG1 homolog, ceramide synthase 1 OS=Mus musculus GN=Lass1 PE=2 SV=1;sp|P27545|CERS1_MOUSE Ceramide synthase 1 OS=Mus musculus GN=Cers1 PE=1 SV=1	22263000	41148000	45158000	7238000	1484200	2743200	3010600	46056000	31507000	48961000	3	3	3	10.3	10.3	10.3	40.1	0.00014808	4.22	108570000	8	1	3	2	1	3	2	1	3	2	1	4	3
372	A2RT28;Q499X9	A2RT28;Q499X9	Methionine--tRNA ligase, mitochondrial	Mars2	tr|A2RT28|A2RT28_MOUSE Methionine-tRNA synthetase 2 (Mitochondrial) OS=Mus musculus GN=Mars2 PE=2 SV=1;sp|Q499X9|SYMM_MOUSE Methionine--tRNA ligase, mitochondrial OS=Mus musculus GN=Mars2 PE=2 SV=2	924040000	641710000	647500000	76319000	31863000	22128000	22328000	888200000	718020000	571980000	12	12	12	33.6	33.6	33.6	65.804	0	49.575	2213300000	37	10	8	6	10	8	6	10	8	6	14	11	12
373	A2RT57;Q9CQC8;Q9CQC8-2	A2RT57;Q9CQC8;Q9CQC8-2	Maspardin	Spg21	tr|A2RT57|A2RT57_MOUSE Spastic paraplegia 21 homolog (Human) OS=Mus musculus GN=Spg21 PE=2 SV=1;sp|Q9CQC8|SPG21_MOUSE Maspardin OS=Mus musculus GN=Spg21 PE=1 SV=1;sp|Q9CQC8-2|SPG21_MOUSE Isoform 2 of Maspardin OS=Mus musculus GN=Spg21	545790000	762050000	979880000	127100000	30322000	42336000	54438000	833310000	596980000	879490000	11	11	11	46.4	46.4	46.4	34.952	0	45.72	2287700000	33	6	8	9	6	8	9	6	8	9	9	11	13
374	Q9D6U7;A2RTA0;P07310;A2ARP5	Q9D6U7;A2RTA0;P07310	Creatine kinase M-type	Ckm	tr|Q9D6U7|Q9D6U7_MOUSE Putative uncharacterized protein OS=Mus musculus GN=Ckm PE=2 SV=1;tr|A2RTA0|A2RTA0_MOUSE Creatine kinase, muscle OS=Mus musculus GN=Ckm PE=2 SV=1;sp|P07310|KCRM_MOUSE Creatine kinase M-type OS=Mus musculus GN=Ckm PE=1 SV=1	0	175420000	82308000	10309000	0	7016800	3292300	0	200060000	88504000	4	1	1	12.1	8.4	8.4	43.03	0.00015908	6.0417	257730000	2	2	4	3	0	1	1	0	1	1	0	1	1
375	A2RTC2;Q8VIG0-2;Q8VIG0;Q8VIG0-3	A2RTC2;Q8VIG0-2;Q8VIG0;Q8VIG0-3	Zinc finger CCHC domain-containing protein 14	Zcchc14	tr|A2RTC2|A2RTC2_MOUSE Zinc finger, CCHC domain containing 14 OS=Mus musculus GN=Zcchc14 PE=2 SV=1;sp|Q8VIG0-2|ZCH14_MOUSE Isoform 2 of Zinc finger CCHC domain-containing protein 14 OS=Mus musculus GN=Zcchc14;sp|Q8VIG0|ZCH14_MOUSE Zinc finger CCHC domain-c	3822500	9290400	7467700	588020	109210	265440	213360	4618200	10993000	9355200	1	1	1	1.5	1.5	1.5	99.834	0.002302	2.3913	20581000	3	1	1	1	1	1	1	1	1	1	1	1	1
376	A2RTC8;Q3KNM2;F6W8T3	A2RTC8;Q3KNM2	E3 ubiquitin-protein ligase MARCH5	2005-03-01	tr|A2RTC8|A2RTC8_MOUSE MCG13921, isoform CRA_b OS=Mus musculus GN=March5 PE=2 SV=1;sp|Q3KNM2|MARH5_MOUSE E3 ubiquitin-protein ligase MARCH5 OS=Mus musculus GN=March5 PE=2 SV=1	954810000	1091000000	693200000	161120000	56165000	64178000	40776000	988750000	1084200000	907530000	7	7	7	34.9	34.9	34.9	31.231	0	18.115	2739000000	16	5	4	4	5	4	4	5	4	4	6	6	4
377	A2RTH5;Q78K29;Q9D963;Q6PDZ4	A2RTH5		Lcmt1	tr|A2RTH5|A2RTH5_MOUSE Leucine carboxyl methyltransferase 1 OS=Mus musculus GN=Lcmt1 PE=2 SV=1	552660000	657080000	450430000	79056000	26317000	31289000	21449000	597650000	534000000	540680000	10	10	10	38.6	38.6	38.6	38.192	0	23.788	1660200000	28	7	9	6	7	9	6	7	9	6	10	12	6
378	A2RTI3;O89017;Q3UE99	A2RTI3;O89017;Q3UE99	Legumain	Lgmn	tr|A2RTI3|A2RTI3_MOUSE Legumain OS=Mus musculus GN=Lgmn PE=2 SV=1;sp|O89017|LGMN_MOUSE Legumain OS=Mus musculus GN=Lgmn PE=1 SV=1;tr|Q3UE99|Q3UE99_MOUSE Putative uncharacterized protein (Fragment) OS=Mus musculus GN=Lgmn PE=2 SV=1	1470400000	1723100000	1130600000	196550000	66834000	78322000	51393000	1501600000	1552300000	1183100000	4	4	4	12.2	12.2	12.2	49.372	0	83.129	4324100000	13	3	4	2	3	4	2	3	4	2	5	5	3
379	B7ZNU2;S4R265;S4R2L4;A2RTL5;Q8BI46;Q9CSJ3;S4R2G2;S4R1M5;Q922F2	B7ZNU2;S4R265;S4R2L4;A2RTL5;Q8BI46;Q9CSJ3;S4R2G2;S4R1M5;Q922F2	Arginine/serine-rich coiled-coil protein 2	Rsrc2	tr|B7ZNU2|B7ZNU2_MOUSE Rsrc2 protein OS=Mus musculus GN=Rsrc2 PE=2 SV=1;tr|S4R265|S4R265_MOUSE Arginine/serine-rich coiled-coil protein 2 OS=Mus musculus GN=Rsrc2 PE=4 SV=1;tr|S4R2L4|S4R2L4_MOUSE Arginine/serine-rich coiled-coil protein 2 OS=Mus musculus G	108700000	257550000	313340000	42474000	6793600	16097000	19584000	212880000	271390000	295440000	2	2	2	9.1	9.1	9.1	43.805	0	7.4701	679580000	8	2	2	2	2	2	2	2	2	2	2	2	4
380	A2RTT4;P61089	A2RTT4;P61089	Ubiquitin-conjugating enzyme E2 N	Ube2n	tr|A2RTT4|A2RTT4_MOUSE MCG4297 OS=Mus musculus GN=Ube2n PE=2 SV=1;sp|P61089|UBE2N_MOUSE Ubiquitin-conjugating enzyme E2 N OS=Mus musculus GN=Ube2n PE=1 SV=1	13747000000	14617000000	11907000000	3661000000	1249800000	1328800000	1082400000	15333000000	19748000000	8090300000	7	7	6	65.1	65.1	60.5	17.138	0	37.901	40271000000	65	7	7	7	7	7	7	6	6	6	25	18	22
381	B1AWL2;A2SW42;B1AWL4;B1AWL5;Q69ZA0;Q8CD61;Q4FZD0	B1AWL2;A2SW42;B1AWL4;B1AWL5		Zfp462	tr|B1AWL2|B1AWL2_MOUSE Protein Zfp462 OS=Mus musculus GN=Zfp462 PE=4 SV=1;tr|A2SW42|A2SW42_MOUSE Zinc finger protein 462 OS=Mus musculus GN=Zfp462 PE=2 SV=1;tr|B1AWL4|B1AWL4_MOUSE Protein Zfp462 OS=Mus musculus GN=Zfp462 PE=4 SV=1;tr|B1AWL5|B1AWL5_MOUSE Pr	366760000	329720000	271490000	8066500	3056300	2747700	2262400	326180000	387030000	277780000	23	23	23	16.1	16.1	16.1	282.71	0	28.63	967980000	31	11	12	11	11	12	11	11	12	11	9	12	10
382	A2VCT7;A8E636;Q6ZQ11;A8E635	A2VCT7;A8E636;Q6ZQ11;A8E635	Chondroitin sulfate synthase 1	Chsy1	tr|A2VCT7|A2VCT7_MOUSE Chsy1 protein (Fragment) OS=Mus musculus GN=Chsy1 PE=2 SV=1;tr|A8E636|A8E636_MOUSE Chsy1 protein (Fragment) OS=Mus musculus GN=Chsy1 PE=2 SV=1;sp|Q6ZQ11|CHSS1_MOUSE Chondroitin sulfate synthase 1 OS=Mus musculus GN=Chsy1 PE=2 SV=2;tr	222060000	110870000	2380700	6448400	4270500	2132200	45782	147070000	173960000	15643000	5	5	5	11.4	11.4	11.4	85.757	0	11.147	335320000	9	2	5	1	2	5	1	2	5	1	2	6	1
383	A2VDG1;Q8CJG1;Q8BJP2;Q8CGU0;H3BJ70;Q8BTF2;H3BL59	A2VDG1;Q8CJG1;Q8BJP2;Q8CGU0;H3BJ70	Protein argonaute;Protein argonaute-1	Ago1	tr|A2VDG1|A2VDG1_MOUSE Protein argonaute (Fragment) OS=Mus musculus GN=Ago1 PE=2 SV=1;sp|Q8CJG1|AGO1_MOUSE Protein argonaute-1 OS=Mus musculus GN=Ago1 PE=1 SV=2;tr|Q8BJP2|Q8BJP2_MOUSE Protein argonaute OS=Mus musculus GN=Ago1 PE=2 SV=1;tr|Q8CGU0|Q8CGU0_MOU	583670000	500410000	644580000	30869000	10423000	8935900	11510000	706000000	618940000	571420000	23	16	11	40.8	31.1	23.3	96.953	0	45.486	1728700000	33	16	17	18	10	11	11	7	8	7	11	12	10
384	A2VDH4;Q3UJQ1;Q8CHK4-2;Q8CHK4;Q8CHK4-3;Q8CHK4-4;Q3YFI9	A2VDH4;Q3UJQ1;Q8CHK4-2;Q8CHK4;Q8CHK4-3;Q8CHK4-4;Q3YFI9	Histone acetyltransferase;Histone acetyltransferase KAT5	Kat5	tr|A2VDH4|A2VDH4_MOUSE Kat5 protein (Fragment) OS=Mus musculus GN=Kat5 PE=2 SV=1;tr|Q3UJQ1|Q3UJQ1_MOUSE HIV-1 tat interactive protein, homolog (Human), isoform CRA_a OS=Mus musculus GN=Kat5 PE=2 SV=1;sp|Q8CHK4-2|KAT5_MOUSE Isoform 2 of Histone acetyltransf	102840000	71180000	82714000	8852800	3546100	2454500	2852200	107650000	0	81919000	7	7	7	24.6	24.6	24.6	52.961	0	15.872	256730000	8	3	2	6	3	2	6	3	2	6	2	2	4
385	A3KG01;A3KG02;A3KG00;Q6P5F1;P54763;P54763-2	A3KG01;A3KG02;A3KG00;Q6P5F1;P54763;P54763-2	Receptor protein-tyrosine kinase;Ephrin type-B receptor 2	Ephb2	tr|A3KG01|A3KG01_MOUSE Eph receptor B2 OS=Mus musculus GN=Ephb2 PE=2 SV=2;tr|A3KG02|A3KG02_MOUSE Ephrin type-B receptor 2 OS=Mus musculus GN=Ephb2 PE=4 SV=1;tr|A3KG00|A3KG00_MOUSE Ephrin type-B receptor 2 OS=Mus musculus GN=Ephb2 PE=4 SV=2;tr|Q6P5F1|Q6P5F1	182850000	234540000	50072000	8656800	3386100	4343400	927270	116320000	212970000	125960000	10	8	7	16.4	14.5	12.9	109.9	0	13.308	467470000	12	7	7	5	6	6	3	5	5	2	5	4	3
386	A3KG93;Q6ZQ88;G8JL40;F6Z4I3;F6ZC60	A3KG93;Q6ZQ88;G8JL40	Lysine-specific histone demethylase 1A	Kdm1a	tr|A3KG93|A3KG93_MOUSE Lysine-specific histone demethylase 1A OS=Mus musculus GN=Kdm1a PE=4 SV=1;sp|Q6ZQ88|KDM1A_MOUSE Lysine-specific histone demethylase 1A OS=Mus musculus GN=Kdm1a PE=1 SV=2;tr|G8JL40|G8JL40_MOUSE Lysine-specific histone demethylase 1A (	2781900000	2982900000	2620000000	186330000	61820000	66286000	58222000	3009300000	2587800000	3069200000	26	26	26	49.5	49.5	49.5	94.658	0	106.61	8384800000	86	20	24	18	20	24	18	20	24	18	33	29	24
387	B9EKQ1;A3KGB4;Q9Z1A9	B9EKQ1;A3KGB4	TBC1 domain family member 8B	Tbc1d8b	tr|B9EKQ1|B9EKQ1_MOUSE Tbc1d8b protein OS=Mus musculus GN=Tbc1d8b PE=2 SV=1;sp|A3KGB4|TBC8B_MOUSE TBC1 domain family member 8B OS=Mus musculus GN=Tbc1d8b PE=2 SV=1	907940000	750210000	614430000	39182000	15654000	12935000	10594000	899710000	808690000	725030000	22	22	22	28.3	28.3	28.3	127.47	0	62.246	2272600000	48	12	16	15	12	16	15	12	16	15	15	17	16
388	A3KGF9	A3KGF9	Uncharacterized protein C15orf52 homolog		sp|A3KGF9|CO052_MOUSE Uncharacterized protein C15orf52 homolog OS=Mus musculus PE=1 SV=1	223500000	191630000	316830000	26142000	7982300	6843900	11315000	217140000	258830000	269840000	8	8	8	28.1	28.1	28.1	58.688	0	20.224	731970000	16	7	5	4	7	5	4	7	5	4	7	5	4
389	A3KGG8;Q9D9Z1;H3BKK2;F7BE71;A3KGG6;Q9CYZ4	A3KGG8;Q9D9Z1;H3BKK2;F7BE71;A3KGG6	Small kinetochore-associated protein	Knstrn	tr|A3KGG8|A3KGG8_MOUSE Small kinetochore-associated protein OS=Mus musculus GN=Knstrn PE=4 SV=1;sp|Q9D9Z1|SKAP_MOUSE Small kinetochore-associated protein OS=Mus musculus GN=Knstrn PE=2 SV=2;tr|H3BKK2|H3BKK2_MOUSE Small kinetochore-associated protein (Fragm	491060000	714080000	520930000	107880000	30691000	44630000	32558000	479710000	606770000	590430000	5	5	5	34.6	34.6	34.6	26.495	0	20.468	1726100000	16	3	5	4	3	5	4	3	5	4	5	6	5
390	A3KGI3;Q66JQ7;A3KGI5;Q9CYF0	A3KGI3;Q66JQ7	Protein CASC5	Casc5	tr|A3KGI3|A3KGI3_MOUSE Protein CASC5 OS=Mus musculus GN=Casc5 PE=4 SV=1;sp|Q66JQ7|CASC5_MOUSE Protein CASC5 OS=Mus musculus GN=Casc5 PE=2 SV=3	189870000	255710000	198630000	4955500	1460500	1967000	1527900	176670000	206790000	302240000	17	17	17	12.6	12.6	12.6	238.18	0	25.356	644210000	22	4	11	9	4	11	9	4	11	9	4	9	9
391	A3KGL3;A3KGL0;Q99KU1;Q99KU1-2;A3KGK9	A3KGL3;A3KGL0;Q99KU1;Q99KU1-2;A3KGK9	Dehydrodolichyl diphosphate syntase complex subunit Dhdds	Dhdds	tr|A3KGL3|A3KGL3_MOUSE Dehydrodolichyl diphosphate synthase (Fragment) OS=Mus musculus GN=Dhdds PE=3 SV=1;tr|A3KGL0|A3KGL0_MOUSE Dehydrodolichyl diphosphate synthase OS=Mus musculus GN=Dhdds PE=3 SV=1;sp|Q99KU1|DHDDS_MOUSE Dehydrodolichyl diphosphate synth	0	34001000	26015000	3334200	0	1888900	1445300	0	40233000	32591000	2	1	1	8.1	5.8	5.8	29.777	0.0048601	1.8612	60016000	2	0	2	2	0	1	1	0	1	1	0	1	1
392	Q5BL14;Q58E57;A3KGL9;F6W687;P09602;B7ZCQ3;E9Q2Z4;J3QM43	Q5BL14;Q58E57;A3KGL9;F6W687;P09602;B7ZCQ3;E9Q2Z4	Non-histone chromosomal protein HMG-17	Hmgn2;Gm16494	tr|Q5BL14|Q5BL14_MOUSE High mobility group nucleosomal binding domain 2 OS=Mus musculus GN=Hmgn2 PE=2 SV=1;tr|Q58E57|Q58E57_MOUSE High mobility group nucleosomal binding domain 2 OS=Mus musculus GN=Hmgn2 PE=2 SV=1;tr|A3KGL9|A3KGL9_MOUSE Non-histone chromos	82381000	87734000	74633000	61187000	20595000	21934000	18658000	111200000	90984000	69529000	7	1	1	47.8	14.4	14.4	9.4226	0.0097236	1.5068	244750000	5	7	6	7	1	1	1	1	1	1	1	2	2
393	A3KGQ6;Q9D898	A3KGQ6;Q9D898	Actin-related protein 2/3 complex subunit 5;Actin-related protein 2/3 complex subunit 5-like protein	Arpc5l	tr|A3KGQ6|A3KGQ6_MOUSE Actin-related protein 2/3 complex subunit 5 OS=Mus musculus GN=Arpc5l PE=3 SV=1;sp|Q9D898|ARP5L_MOUSE Actin-related protein 2/3 complex subunit 5-like protein OS=Mus musculus GN=Arpc5l PE=1 SV=1	567130000	1027300000	946360000	211740000	47261000	85612000	78863000	835920000	799810000	882100000	7	7	7	62.7	62.7	62.7	17.109	0	33.629	2540800000	24	4	5	6	4	5	6	4	5	6	5	10	9
394	A3KGU5;B7ZWK3;E9Q447;Q3V1V5;Q3URW8;Q3TYI8;Q58ES7;Q6PA04;A3KGU9;Q3TNY2;A3KGU4	A3KGU5;B7ZWK3;E9Q447		Sptan1	tr|A3KGU5|A3KGU5_MOUSE Spectrin alpha chain, non-erythrocytic 1 OS=Mus musculus GN=Sptan1 PE=1 SV=1;tr|B7ZWK3|B7ZWK3_MOUSE Spna2 protein OS=Mus musculus GN=Sptan1 PE=2 SV=1;tr|E9Q447|E9Q447_MOUSE Spectrin alpha chain, non-erythrocytic 1 OS=Mus musculus GN=	57435000000	56017000000	49840000000	868570000	305500000	297960000	265100000	55224000000	54612000000	54627000000	159	159	0	70.9	70.9	0	282.89	0	323.31	163290000000	775	137	141	138	137	141	138	0	0	0	278	244	253
395	B9EKJ1;A3KGU7;B2RXX6	B9EKJ1;A3KGU7;B2RXX6		Sptan1	tr|B9EKJ1|B9EKJ1_MOUSE Spna2 protein OS=Mus musculus GN=Sptan1 PE=2 SV=1;tr|A3KGU7|A3KGU7_MOUSE Spectrin alpha chain, non-erythrocytic 1 OS=Mus musculus GN=Sptan1 PE=1 SV=1;tr|B2RXX6|B2RXX6_MOUSE Spna2 protein OS=Mus musculus GN=Sptan1 PE=2 SV=1	108340000	151200000	99214000	1888200	570210	795810	522180	130540000	128270000	95294000	159	1	0	70.3	0.6	0	285.18	0	10.813	358760000	6	137	141	139	1	1	1	0	0	0	1	2	3
396	A3KGV1-2;A3KGV1-3;A3KGV1-4;A3KGV1;A3KGV9;V9GXZ0;A3KGW0;A3KGV1-7;A3KGV1-6;A3KGV1-5;Q3UFG2;Q2QF30;Q2QF27;Q2QF29;F6Y325;Q2QF28	A3KGV1-2;A3KGV1-3;A3KGV1-4;A3KGV1;A3KGV9;V9GXZ0;A3KGW0;A3KGV1-7;A3KGV1-6;A3KGV1-5;Q3UFG2	Outer dense fiber protein 2	Odf2	sp|A3KGV1-2|ODFP2_MOUSE Isoform 2 of Outer dense fiber protein 2 OS=Mus musculus GN=Odf2;sp|A3KGV1-3|ODFP2_MOUSE Isoform 3 of Outer dense fiber protein 2 OS=Mus musculus GN=Odf2;sp|A3KGV1-4|ODFP2_MOUSE Isoform 4 of Outer dense fiber protein 2 OS=Mus muscul	30761000	4267300	40141000	1342300	549300	76202	716810	34017000	0	0	4	4	4	7.3	7.3	7.3	93.293	0.0090136	1.5938	75170000	3	2	1	1	2	1	1	2	1	1	1	1	1
397	A3KMD2;Q8BIV3	A3KMD2;Q8BIV3	Ran-binding protein 6	Ranbp6	tr|A3KMD2|A3KMD2_MOUSE RAN binding protein 6 OS=Mus musculus GN=Ranbp6 PE=2 SV=1;sp|Q8BIV3|RNBP6_MOUSE Ran-binding protein 6 OS=Mus musculus GN=Ranbp6 PE=2 SV=3	109380000	173650000	339550000	10376000	1823100	2894100	5659100	184230000	211160000	273300000	17	16	15	20.8	19.7	18.5	124.59	0	21.366	622570000	27	6	10	11	6	9	10	6	9	10	8	8	11
398	A3KME9;Q3TBF1;Q08642	A3KME9;Q3TBF1;Q08642	Protein-arginine deiminase type-2	Padi2	tr|A3KME9|A3KME9_MOUSE Padi2 protein (Fragment) OS=Mus musculus GN=Padi2 PE=2 SV=1;tr|Q3TBF1|Q3TBF1_MOUSE Putative uncharacterized protein OS=Mus musculus GN=Padi2 PE=2 SV=1;sp|Q08642|PADI2_MOUSE Protein-arginine deiminase type-2 OS=Mus musculus GN=Padi2 P	15032000	12524000	12409000	1998300	751610	626190	620470	14150000	10876000	17823000	2	2	2	9.6	9.6	9.6	36.947	0.00016031	6.2517	39965000	5	1	2	1	1	2	1	1	2	1	2	2	1
399	A3KMF2;Q5DTZ3;G3X8R8;P59759	A3KMF2;Q5DTZ3;G3X8R8;P59759	MKL/myocardin-like protein 2	Mkl2	tr|A3KMF2|A3KMF2_MOUSE Mkl2 protein (Fragment) OS=Mus musculus GN=Mkl2 PE=2 SV=1;tr|Q5DTZ3|Q5DTZ3_MOUSE MKIAA1243 protein (Fragment) OS=Mus musculus GN=Mkl2 PE=1 SV=1;tr|G3X8R8|G3X8R8_MOUSE MCG123888 OS=Mus musculus GN=Mkl2 PE=1 SV=1;sp|P59759|MKL2_MOUSE M	2509900000	1131400000	2154100000	144880000	62748000	28284000	53851000	2277100000	1367600000	1628900000	8	8	7	12.6	12.6	11.4	117.42	0	16.08	5795300000	29	3	7	5	3	7	5	3	7	4	9	12	8
400	A3KMF3;Q75NR7;Q75NR7-2	A3KMF3;Q75NR7;Q75NR7-2	ATP-dependent DNA helicase Q4	Recql4	tr|A3KMF3|A3KMF3_MOUSE Recql4 protein (Fragment) OS=Mus musculus GN=Recql4 PE=2 SV=1;sp|Q75NR7|RECQ4_MOUSE ATP-dependent DNA helicase Q4 OS=Mus musculus GN=Recql4 PE=2 SV=2;sp|Q75NR7-2|RECQ4_MOUSE Isoform 2 of ATP-dependent DNA helicase Q4 OS=Mus musculus	22199000	44679000	0	1194300	396410	797850	0	25760000	32513000	0	2	2	2	4.2	4.2	4.2	134.79	0.0052329	1.8046	66878000	3	1	2	0	1	2	0	1	2	0	1	2	0
401	A3KMJ8;P61759;Q3TIR6	A3KMJ8;P61759;Q3TIR6	Prefoldin subunit 3	Vbp1	tr|A3KMJ8|A3KMJ8_MOUSE Vbp1 protein (Fragment) OS=Mus musculus GN=Vbp1 PE=2 SV=1;sp|P61759|PFD3_MOUSE Prefoldin subunit 3 OS=Mus musculus GN=Vbp1 PE=2 SV=2;tr|Q3TIR6|Q3TIR6_MOUSE Prefoldin subunit 3 OS=Mus musculus GN=Vbp1 PE=2 SV=1	2939900000	2709500000	2538100000	545840000	196000000	180630000	169210000	3251600000	2529500000	2953300000	14	14	14	59.2	59.2	59.2	21.963	0	129.05	8187500000	53	11	12	11	11	12	11	11	12	11	18	18	17
402	A3KML3;F6VW30;P68254;F6YY69;P68254-2	A3KML3;F6VW30;P68254;F6YY69;P68254-2	14-3-3 protein theta	Ywhaq	tr|A3KML3|A3KML3_MOUSE MCG126220 OS=Mus musculus GN=Ywhaq PE=2 SV=1;tr|F6VW30|F6VW30_MOUSE 14-3-3 protein theta (Fragment) OS=Mus musculus GN=Ywhaq PE=3 SV=1;sp|P68254|1433T_MOUSE 14-3-3 protein theta OS=Mus musculus GN=Ywhaq PE=1 SV=1;tr|F6YY69|F6YY69_MOU	35916000000	28926000000	29669000000	5250600000	1995300000	1607000000	1648300000	34177000000	24054000000	36031000000	20	17	15	66.1	60	56.3	27.778	0	310.16	94510000000	182	18	20	18	15	17	15	13	15	13	68	58	56
403	E9Q9C5;Q8C1D9;A3KML5;Q80YP7;P63082;D3Z3B2;Q3UK60;A4FVC9	E9Q9C5;Q8C1D9;A3KML5;Q80YP7;P63082;D3Z3B2;Q3UK60	V-type proton ATPase 16 kDa proteolipid subunit	Atp6v0c	tr|E9Q9C5|E9Q9C5_MOUSE V-type proton ATPase 16 kDa proteolipid subunit (Fragment) OS=Mus musculus GN=Atp6v0c PE=3 SV=1;tr|Q8C1D9|Q8C1D9_MOUSE Putative uncharacterized protein OS=Mus musculus GN=Atp6v0c PE=2 SV=1;tr|A3KML5|A3KML5_MOUSE ATPase, H+ transporti	3998300000	4920700000	3903300000	3205600000	999580000	1230200000	975820000	3829700000	3768900000	3375600000	3	3	3	32.7	32.7	32.7	15.265	0	10.843	12822000000	56	3	3	3	3	3	3	3	3	3	17	24	15
404	A3KN70;Q8CHG1;Q9JLM8;Q9JLM7;Q8BRN4;Q1EDH1;H7BX36;Q9JLM6;Q8CCN4;Q8BQN2	A3KN70;Q8CHG1;Q9JLM8;Q9JLM7;Q8BRN4	Serine/threonine-protein kinase DCLK1	Dclk1	tr|A3KN70|A3KN70_MOUSE Dclk1 protein OS=Mus musculus GN=Dclk1 PE=2 SV=1;tr|Q8CHG1|Q8CHG1_MOUSE MKIAA0369 protein (Fragment) OS=Mus musculus GN=Dclk1 PE=2 SV=1;sp|Q9JLM8|DCLK1_MOUSE Serine/threonine-protein kinase DCLK1 OS=Mus musculus GN=Dclk1 PE=1 SV=1;tr	1342100000	1386100000	1447000000	107060000	34413000	35541000	37103000	1454200000	1611800000	1638500000	18	18	2	29.6	29.6	4.3	82.191	0	84.877	4175200000	39	11	13	11	11	13	11	1	2	1	14	14	11
405	Q7M6W1;A3QM89;Q4FZ95;Q4FJL2;Q8K0T0	Q7M6W1;A3QM89;Q4FZ95;Q4FJL2;Q8K0T0	Reticulon;Reticulon-1	Rtn1	tr|Q7M6W1|Q7M6W1_MOUSE Reticulon OS=Mus musculus GN=Rtn1 PE=2 SV=1;tr|A3QM89|A3QM89_MOUSE Reticulon (Fragment) OS=Mus musculus GN=Rtn1 PE=4 SV=1;tr|Q4FZ95|Q4FZ95_MOUSE Reticulon OS=Mus musculus GN=Rtn1 PE=2 SV=1;tr|Q4FJL2|Q4FJL2_MOUSE Reticulon OS=Mus musc	2655100000	2569500000	6828200	523140000	265510000	256950000	682820	2377400000	2820100000	8766900	1	1	1	3.8	3.8	3.8	23.557	0.0063727	1.7215	5231400000	8	1	1	1	1	1	1	1	1	1	5	2	1
406	Q3UHA7;A3QWY0;Q80U80;Q9WTZ2	Q3UHA7;A3QWY0;Q80U80;Q9WTZ2	Membrane-bound transcription factor site-1 protease	Mbtps1;mKIAA0091	tr|Q3UHA7|Q3UHA7_MOUSE Putative uncharacterized protein OS=Mus musculus GN=Mbtps1 PE=2 SV=1;tr|A3QWY0|A3QWY0_MOUSE Membrane-bound transcription factor peptidase site 1 mutant OS=Mus musculus GN=Mbtps1 PE=2 SV=1;tr|Q80U80|Q80U80_MOUSE MKIAA0091 protein (Fra	0	31555000	9119800	1162100	0	901580	260570	0	21506000	18542000	2	2	2	3.1	3.1	3.1	100.16	0.00070552	3.16	40675000	3	0	2	1	0	2	1	0	2	1	0	2	1
407	Q7JCX7;Q7JCA9;G3EBA9;A3R3W7;P00416	Q7JCX7;Q7JCA9;G3EBA9;A3R3W7;P00416	Cytochrome c oxidase subunit 3	mt-Co3;COX3;COXIII	tr|Q7JCX7|Q7JCX7_MOUSE Cytochrome c oxidase subunit 3 OS=Mus musculus GN=mt-Co3 PE=2 SV=1;tr|Q7JCA9|Q7JCA9_MOUSE Cytochrome c oxidase subunit 3 OS=Mus musculus GN=COX3 PE=3 SV=1;tr|G3EBA9|G3EBA9_MOUSE Cytochrome c oxidase subunit 3 OS=Mus musculus GN=COX3	207210000	156310000	219560000	291540000	103600000	78154000	109780000	129550000	105350000	314410000	1	1	1	5.4	5.4	5.4	29.922	0.00084317	3.0822	583070000	7	1	1	1	1	1	1	1	1	1	2	3	2
408	Q7JCZ0;A3R404;P03930	Q7JCZ0;A3R404;P03930	ATP synthase protein 8	mt-Atp8;ATP8;Mtatp8	tr|Q7JCZ0|Q7JCZ0_MOUSE ATP synthase protein 8 OS=Mus musculus GN=mt-Atp8 PE=1 SV=1;tr|A3R404|A3R404_MOUSE ATP synthase protein 8 OS=Mus musculus GN=ATP8 PE=3 SV=1;sp|P03930|ATP8_MOUSE ATP synthase protein 8 OS=Mus musculus GN=Mtatp8 PE=1 SV=1	1131600000	925150000	1247400000	660840000	226320000	185030000	249480000	1044700000	1128100000	1675000000	3	3	3	43.3	43.3	43.3	7.7662	0.00016228	6.6324	3304200000	15	3	3	3	3	3	3	3	3	3	6	5	4
409	A4FU75;Q6WQJ1	A4FU75;Q6WQJ1	Sn1-specific diacylglycerol lipase alpha	Dagla	tr|A4FU75|A4FU75_MOUSE Dagla protein (Fragment) OS=Mus musculus GN=Dagla PE=2 SV=1;sp|Q6WQJ1|DGLA_MOUSE Sn1-specific diacylglycerol lipase alpha OS=Mus musculus GN=Dagla PE=1 SV=2	959590000	743470000	597470000	45108000	18816000	14578000	11715000	861370000	902920000	699050000	21	21	21	30.4	30.4	30.4	115.24	0	95.718	2300500000	45	15	13	11	15	13	11	15	13	11	17	16	12
410	A4FUI4;P41155	A4FUI4;P41155	Lymphotoxin-beta	Ltb	tr|A4FUI4|A4FUI4_MOUSE Ltb protein (Fragment) OS=Mus musculus GN=Ltb PE=2 SV=1;sp|P41155|TNFC_MOUSE Lymphotoxin-beta OS=Mus musculus GN=Ltb PE=2 SV=1	0	0	0	0	0	0	0	0	0	0	1	1	1	3.6	3.6	3.6	32.249	1	-2	0	0	0	0	1	0	0	1	0	0	1	0	0	0
411	A4FUJ5;B2RTE5;Q3TMW1	A4FUJ5;B2RTE5;Q3TMW1	Coiled-coil domain-containing protein 102A	Ccdc102a	tr|A4FUJ5|A4FUJ5_MOUSE Ccdc102a protein (Fragment) OS=Mus musculus GN=Ccdc102a PE=2 SV=1;tr|B2RTE5|B2RTE5_MOUSE Coiled-coil domain containing 102A OS=Mus musculus GN=Ccdc102a PE=2 SV=1;sp|Q3TMW1|C102A_MOUSE Coiled-coil domain-containing protein 102A OS=Mus	83439000	20549000	132850000	8458600	2980000	733880	4744800	29846000	3026700	211700000	3	3	3	9.2	9.2	9.2	52.765	0.00070393	3.1076	236840000	3	1	2	2	1	2	2	1	2	2	0	1	2
412	A4FUP7;Q99KQ9;Q9ES93;Q9R013	A4FUP7;Q99KQ9;Q9ES93;Q9R013	Cathepsin F	Ctsf	tr|A4FUP7|A4FUP7_MOUSE Ctsf protein (Fragment) OS=Mus musculus GN=Ctsf PE=2 SV=1;tr|Q99KQ9|Q99KQ9_MOUSE Ctsf protein (Fragment) OS=Mus musculus GN=Ctsf PE=2 SV=2;tr|Q9ES93|Q9ES93_MOUSE Cathepsin F OS=Mus musculus GN=Ctsf PE=2 SV=1;sp|Q9R013|CATF_MOUSE Cath	0	0	24965000	2269600	0	0	2269600	0	0	35424000	1	1	1	8.6	8.6	8.6	19.276	0.0015077	2.5906	24965000	1	0	0	1	0	0	1	0	0	1	0	0	1
413	A4FUS1;Q641N3;Q5CZY9;P14131	A4FUS1;Q641N3;Q5CZY9;P14131	40S ribosomal protein S16	Rps16	tr|A4FUS1|A4FUS1_MOUSE MCG123443 OS=Mus musculus GN=Rps16 PE=2 SV=1;tr|Q641N3|Q641N3_MOUSE Rps16 protein (Fragment) OS=Mus musculus GN=Rps16 PE=2 SV=1;tr|Q5CZY9|Q5CZY9_MOUSE Rps16 protein OS=Mus musculus GN=Rps16 PE=2 SV=1;sp|P14131|RS16_MOUSE 40S ribosoma	28161000000	29057000000	23903000000	6760100000	2346800000	2421400000	1992000000	25596000000	29864000000	25195000000	11	11	11	59.6	59.6	59.6	16.445	0	26.593	81121000000	107	10	10	11	10	10	11	10	10	11	35	36	36
414	A4FUU4;Q64FW2;H3BJ51;H3BKK1;F7CW61	A4FUU4;Q64FW2;H3BJ51;H3BKK1	All-trans-retinol 13,14-reductase	Retsat	tr|A4FUU4|A4FUU4_MOUSE Retsat protein (Fragment) OS=Mus musculus GN=Retsat PE=2 SV=1;sp|Q64FW2|RETST_MOUSE All-trans-retinol 13,14-reductase OS=Mus musculus GN=Retsat PE=1 SV=3;tr|H3BJ51|H3BJ51_MOUSE All-trans-retinol 13,14-reductase OS=Mus musculus GN=Ret	284910000	354160000	265450000	25125000	7914200	9837700	7373600	271340000	401900000	316670000	9	9	9	18.1	18.1	18.1	67.016	0	33.168	904520000	17	5	8	6	5	8	6	5	8	6	4	7	6
415	A4FUU9;Q9DBC0;B9EJ24;S4R1U9	A4FUU9;Q9DBC0;B9EJ24	Selenoprotein O	Selo	tr|A4FUU9|A4FUU9_MOUSE 1300018J18Rik protein (Fragment) OS=Mus musculus GN=Selo PE=2 SV=1;sp|Q9DBC0|SELO_MOUSE Selenoprotein O OS=Mus musculus GN=Selo PE=2 SV=4;tr|B9EJ24|B9EJ24_MOUSE Uncharacterized protein OS=Mus musculus GN=Selo PE=2 SV=1	50096000	60700000	46230000	5414700	1727400	2093100	1594100	25798000	118010000	19786000	4	4	4	11.9	11.9	11.9	57.19	0	21.086	157030000	9	3	2	4	3	2	4	3	2	4	4	2	3
416	A4FUV7;A4FUV6;F8VQL0;P16056;Q3TCS4;F6X333;Q6Q532;Q6Q533;Q6Q531;A2VCS0;D3YVY2;Q8BQI4;Q0VBH4;B2RUR6;Q62270;Q62190	A4FUV7;A4FUV6;F8VQL0;P16056	Receptor protein-tyrosine kinase;Hepatocyte growth factor receptor	Met	tr|A4FUV7|A4FUV7_MOUSE Met protein (Fragment) OS=Mus musculus GN=Met PE=2 SV=1;tr|A4FUV6|A4FUV6_MOUSE Met protein (Fragment) OS=Mus musculus GN=Met PE=2 SV=1;tr|F8VQL0|F8VQL0_MOUSE Hepatocyte growth factor receptor OS=Mus musculus GN=Met PE=3 SV=1;sp|P1605	1010300000	930310000	563710000	35272000	14230000	13103000	7939500	919030000	896650000	812640000	20	19	19	20	19.5	19.5	153.3	0	71.123	2504300000	53	14	16	13	14	15	12	14	15	12	20	19	14
417	A4FUW0;A4FUV9;Q8BFW4;Q8BFW4-2;Q8BJT1	A4FUW0;A4FUV9;Q8BFW4;Q8BFW4-2	Tripartite motif-containing protein 65	Trim65	tr|A4FUW0|A4FUW0_MOUSE Trim65 protein (Fragment) OS=Mus musculus GN=Trim65 PE=2 SV=1;tr|A4FUV9|A4FUV9_MOUSE Trim65 protein (Fragment) OS=Mus musculus GN=Trim65 PE=2 SV=1;sp|Q8BFW4|TRI65_MOUSE Tripartite motif-containing protein 65 OS=Mus musculus GN=Trim65	22612000	218760000	94150000	13421000	904490	8750500	3766000	41303000	167660000	132590000	7	7	7	21	21	21	53.883	0	9.0398	335530000	10	1	6	4	1	6	4	1	6	4	0	6	4
418	D3Z6V7;D3Z5I6;A4GZ26;E9QAD8;Q5DU25	D3Z6V7;D3Z5I6;A4GZ26;E9QAD8;Q5DU25	IQ motif and SEC7 domain-containing protein 2	Iqsec2	tr|D3Z6V7|D3Z6V7_MOUSE IQ motif and SEC7 domain-containing protein 2 OS=Mus musculus GN=Iqsec2 PE=1 SV=1;tr|D3Z5I6|D3Z5I6_MOUSE IQ motif and SEC7 domain-containing protein 2 OS=Mus musculus GN=Iqsec2 PE=1 SV=1;tr|A4GZ26|A4GZ26_MOUSE ARF6 guanine nucleotide	0	0	0	0	0	0	0	0	0	0	3	1	1	2.4	0.7	0.7	105.2	1	-2	0	0	2	2	2	1	1	0	1	1	0	0	0	0
419	F7BQM5;A4Q9F4-3;A4Q9F4-2	F7BQM5;A4Q9F4-3;A4Q9F4-2		Ttll11	tr|F7BQM5|F7BQM5_MOUSE Tubulin polyglutamylase TTLL11 (Fragment) OS=Mus musculus GN=Ttll11 PE=4 SV=1;sp|A4Q9F4-3|TTL11_MOUSE Isoform 3 of Tubulin polyglutamylase TTLL11 OS=Mus musculus GN=Ttll11;sp|A4Q9F4-2|TTL11_MOUSE Isoform 2 of Tubulin polyglutamylase	0	0	0	0	0	0	0	0	0	0	1	1	1	1.8	1.8	1.8	58.203	1	-2	0	0	0	0	1	0	0	1	0	0	1	0	0	0
420	A4QMQ0;Q9CZD5	A4QMQ0;Q9CZD5	Translation initiation factor IF-3, mitochondrial	Mtif3	tr|A4QMQ0|A4QMQ0_MOUSE Mitochondrial translational initiation factor 3 OS=Mus musculus GN=Mtif3 PE=2 SV=1;sp|Q9CZD5|IF3M_MOUSE Translation initiation factor IF-3, mitochondrial OS=Mus musculus GN=Mtif3 PE=1 SV=1	0	0	68994000	3833000	0	0	3833000	0	0	74188000	1	1	1	7.6	7.6	7.6	31.739	0.0016364	2.4895	68994000	1	0	0	1	0	0	1	0	0	1	0	0	1
421	A4QPC9;Q9EQR6;B9EJ17	A4QPC9;Q9EQR6;B9EJ17	Fanconi anemia group G protein homolog	Fancg	tr|A4QPC9|A4QPC9_MOUSE Fancg protein OS=Mus musculus GN=Fancg PE=2 SV=1;sp|Q9EQR6|FANCG_MOUSE Fanconi anemia group G protein homolog OS=Mus musculus GN=Fancg PE=2 SV=1;tr|B9EJ17|B9EJ17_MOUSE Uncharacterized protein OS=Mus musculus GN=Fancg PE=2 SV=1	153150000	16180000	62519000	7025700	4640900	490290	1894500	126330000	0	79596000	3	3	3	6.7	6.7	6.7	67.787	0.0023007	2.3829	231850000	3	2	1	1	2	1	1	2	1	1	1	1	1
422	A4QPD3;P15307	A4QPD3;P15307	Proto-oncogene c-Rel	Rel	tr|A4QPD3|A4QPD3_MOUSE Proto-oncogene c-Rel OS=Mus musculus GN=Rel PE=2 SV=1;sp|P15307|REL_MOUSE Proto-oncogene c-Rel OS=Mus musculus GN=Rel PE=1 SV=2	10702000	57704000	0	2206600	345220	1861400	0	20003000	49889000	0	6	3	3	9.2	6.1	6.1	65.144	0.0020325	2.409	68406000	4	4	6	1	1	3	0	1	3	0	1	3	0
423	A4QPF5;Q8C351-2;Q8C351	A4QPF5;Q8C351-2;Q8C351	Layilin	Layn	tr|A4QPF5|A4QPF5_MOUSE Layn protein OS=Mus musculus GN=Layn PE=2 SV=1;sp|Q8C351-2|LAYN_MOUSE Isoform 2 of Layilin OS=Mus musculus GN=Layn;sp|Q8C351|LAYN_MOUSE Layilin OS=Mus musculus GN=Layn PE=1 SV=4	19733000	27837000	97981000	10397000	1409500	1988400	6998700	49729000	50404000	41283000	2	2	2	5.3	5.3	5.3	36.448	0.00164	2.5313	145550000	7	1	1	2	1	1	2	1	1	2	1	2	4
424	A5A4Z2;G3UZ30;A5A4Y9;A5A4Z1;A5A4Z0;Q8K1L5	A5A4Z2;G3UZ30;A5A4Y9;A5A4Z1;A5A4Z0;Q8K1L5	Protein phosphatase 1 regulatory subunit 11	Ppp1r11	tr|A5A4Z2|A5A4Z2_MOUSE TCTEX5 isoform 2 OS=Mus musculus GN=Ppp1r11 PE=2 SV=1;tr|G3UZ30|G3UZ30_MOUSE Protein phosphatase 1 regulatory subunit 11 (Fragment) OS=Mus musculus GN=Ppp1r11 PE=4 SV=2;tr|A5A4Y9|A5A4Y9_MOUSE Protein phosphatase 1 regulatory subunit	284410000	307240000	251410000	168610000	56881000	61448000	50283000	356540000	360000000	245860000	4	4	4	54.6	54.6	54.6	10.99	0	18.302	843060000	15	2	4	3	2	4	3	2	4	3	5	6	4
425	A5CVE4;I1E4X8;B7ZN44;B2RQE3;P83093;F6WBP9;Q8BIM2;Q8C4Z8	A5CVE4;I1E4X8;B7ZN44;B2RQE3;P83093;F6WBP9;Q8BIM2	Stromal interaction molecule 2	Stim2	tr|A5CVE4|A5CVE4_MOUSE MCG1293 OS=Mus musculus GN=Stim2 PE=2 SV=1;tr|I1E4X8|I1E4X8_MOUSE Stromal interaction molecule 2 OS=Mus musculus GN=Stim2 PE=1 SV=1;tr|B7ZN44|B7ZN44_MOUSE Stim2 protein OS=Mus musculus GN=Stim2 PE=2 SV=1;tr|B2RQE3|B2RQE3_MOUSE Stim2	222550000	237670000	245310000	16035000	5057800	5401600	5575300	214810000	250690000	238340000	10	10	10	21.4	21.4	21.4	83.924	0	56.194	705530000	20	6	7	6	6	7	6	6	7	6	7	7	6
426	B2RUK1;B7ZNY3;F6S7Z1;G3XA13;A5D6P2;Q99NH2;E0CY24;E0CXL4;F6TSJ9;E0CXR8;E0CZE2;E0CZ83;Q99NH2-2;Q8BPQ6;Q8BPQ4;E9PYJ2;Q99NH2-3;Q99NH2-4;F6UGU7;E0CX45;Q99NH2-5;Q4JJC0;F6TB42;F6URI7	B2RUK1;B7ZNY3;F6S7Z1;G3XA13;A5D6P2;Q99NH2;E0CY24;E0CXL4;F6TSJ9;E0CXR8;E0CZE2;E0CZ83;Q99NH2-2;Q8BPQ6;Q8BPQ4;E9PYJ2;Q99NH2-3;Q99NH2-4;F6UGU7;E0CX45;Q99NH2-5	Partitioning defective 3 homolog	Pard3	tr|B2RUK1|B2RUK1_MOUSE Pard3 protein OS=Mus musculus GN=Pard3 PE=2 SV=1;tr|B7ZNY3|B7ZNY3_MOUSE Pard3 protein OS=Mus musculus GN=Pard3 PE=1 SV=1;tr|F6S7Z1|F6S7Z1_MOUSE Partitioning defective 3 homolog (Fragment) OS=Mus musculus GN=Pard3 PE=1 SV=1;tr|G3XA13|	235950000	820970000	146710000	15431000	3025100	10525000	1880900	395730000	404000000	336300000	15	15	15	16.9	16.9	16.9	145.67	0	29.731	1203600000	22	7	12	5	7	12	5	7	12	5	8	8	6
427	A5D6P3;O35379;Q8C7V6;Q3UDM1;E9Q1I5;Q8BRD0;Q9JL41;D3Z407;D3YYJ6;Q9CVX4;D3YZY1	A5D6P3;O35379;Q8C7V6	Multidrug resistance-associated protein 1	Abcc1	tr|A5D6P3|A5D6P3_MOUSE ATP-binding cassette, sub-family C (CFTR/MRP), member 1 OS=Mus musculus GN=Abcc1 PE=2 SV=1;sp|O35379|MRP1_MOUSE Multidrug resistance-associated protein 1 OS=Mus musculus GN=Abcc1 PE=1 SV=1;tr|Q8C7V6|Q8C7V6_MOUSE Putative uncharacteri	1758100000	2229200000	2010500000	73144000	21441000	27185000	24519000	2031900000	2213200000	1901300000	34	34	33	28.8	28.8	27.9	171.18	0	184.36	5997800000	103	25	27	30	25	27	30	24	26	30	33	35	35
428	J3QP81;A5D6Q8;E9QNY9;Q80TV8-2;Q3TPM6	J3QP81;A5D6Q8;E9QNY9;Q80TV8-2	CLIP-associating protein 1	Clasp1	tr|J3QP81|J3QP81_MOUSE CLIP-associating protein 1 OS=Mus musculus GN=Clasp1 PE=1 SV=1;tr|A5D6Q8|A5D6Q8_MOUSE Clasp1 protein OS=Mus musculus GN=Clasp1 PE=2 SV=1;tr|E9QNY9|E9QNY9_MOUSE CLIP-associating protein 1 OS=Mus musculus GN=Clasp1 PE=1 SV=2;sp|Q80TV8-	70228000	13233000	7160200	915370	709370	133670	72326	80124000	12054000	14413000	48	1	1	42.8	1.5	1.5	160.92	0.0024301	2.3231	90621000	4	39	38	35	1	1	1	1	1	1	1	2	1
429	A5GZX3;Q9CPU0	A5GZX3;Q9CPU0	Lactoylglutathione lyase	Glo1	tr|A5GZX3|A5GZX3_MOUSE Lactoylglutathione lyase OS=Mus musculus GN=Glo1 PE=2 SV=1;sp|Q9CPU0|LGUL_MOUSE Lactoylglutathione lyase OS=Mus musculus GN=Glo1 PE=1 SV=3	3250600000	2473400000	2625000000	759010000	295510000	224850000	238640000	3389800000	2497600000	3041400000	8	8	8	42.4	42.4	42.4	20.809	0	21.626	8349100000	59	8	7	7	8	7	7	8	7	7	21	19	19
430	A5HU64;Q3SXA6;Q8BZU4;Q3MI11	A5HU64;Q3SXA6;Q8BZU4;Q3MI11		Tnip3	tr|A5HU64|A5HU64_MOUSE TNFAIP3-interacting protein 3 beta OS=Mus musculus GN=Tnip3 PE=2 SV=1;tr|Q3SXA6|Q3SXA6_MOUSE Protein Tnip3 OS=Mus musculus GN=Tnip3 PE=2 SV=1;tr|Q8BZU4|Q8BZU4_MOUSE Putative uncharacterized protein OS=Mus musculus GN=Tnip3 PE=2 SV=1;	0	0	0	0	0	0	0	0	0	0	1	1	1	7.1	7.1	7.1	23.148	1	-2	0	0	1	0	0	1	0	0	1	0	0	0	0	0
431	A6BLY7	A6BLY7	Keratin, type I cytoskeletal 28	Krt28	sp|A6BLY7|K1C28_MOUSE Keratin, type I cytoskeletal 28 OS=Mus musculus GN=Krt28 PE=1 SV=1	0	0	0	0	0	0	0	0	0	0	2	1	1	3.5	1.9	1.9	50.346	0.007761	1.6496	0	0	2	1	1	1	1	1	1	1	1	0	0	0
432	E9Q9T1;A6H5U5;Q3UZ39-2	E9Q9T1;A6H5U5;Q3UZ39-2	Leucine-rich repeat flightless-interacting protein 1	Lrrfip1	tr|E9Q9T1|E9Q9T1_MOUSE Leucine-rich repeat flightless-interacting protein 1 OS=Mus musculus GN=Lrrfip1 PE=1 SV=2;tr|A6H5U5|A6H5U5_MOUSE Lrrfip1 protein OS=Mus musculus GN=Lrrfip1 PE=2 SV=1;sp|Q3UZ39-2|LRRF1_MOUSE Isoform 2 of Leucine-rich repeat flightless	0	0	20405000	485840	0	0	485840	0	0	21941000	12	1	0	26.8	2.5	0	71.131	1	-2	20405000	1	10	9	10	0	0	1	0	0	0	0	0	1
433	A6H5Y3	A6H5Y3	Methionine synthase	Mtr	sp|A6H5Y3|METH_MOUSE Methionine synthase OS=Mus musculus GN=Mtr PE=2 SV=1	43941000	48906000	19144000	1513400	593800	660890	258710	44175000	54037000	0	5	5	5	4.5	4.5	4.5	139.07	0.00015783	5.8206	111990000	8	3	3	2	3	3	2	3	3	2	3	3	2
434	A6H5Z3;Q6PCN5;A6H5Z3-2;Q5DU10;Q8C1X1;Q9D4R7;E0CXR2;Q8C203;Q8K2N8;E0CY34	A6H5Z3;Q6PCN5;A6H5Z3-2	Exocyst complex component 6B	Exoc6b	sp|A6H5Z3|EXC6B_MOUSE Exocyst complex component 6B OS=Mus musculus GN=Exoc6b PE=2 SV=1;tr|Q6PCN5|Q6PCN5_MOUSE Exoc6b protein (Fragment) OS=Mus musculus GN=Exoc6b PE=2 SV=1;sp|A6H5Z3-2|EXC6B_MOUSE Isoform 2 of Exocyst complex component 6B OS=Mus musculus GN	694940000	603110000	492340000	33781000	13112000	11379000	9289400	621030000	656250000	665940000	20	20	20	32.5	32.5	32.5	94.128	0	43.719	1790400000	44	19	10	9	19	10	9	19	10	9	20	12	12
435	Q4QQR6;F7BJB9;A6H605;Q6A0C2;Q8R0R0	Q4QQR6;F7BJB9;A6H605;Q6A0C2;Q8R0R0		Morc3	tr|Q4QQR6|Q4QQR6_MOUSE Microrchidia 3 OS=Mus musculus GN=Morc3 PE=2 SV=1;tr|F7BJB9|F7BJB9_MOUSE Protein Morc3 OS=Mus musculus GN=Morc3 PE=4 SV=1;tr|A6H605|A6H605_MOUSE Microrchidia 3 OS=Mus musculus GN=Morc3 PE=2 SV=1;tr|Q6A0C2|Q6A0C2_MOUSE MKIAA0136 prote	544720000	565980000	417450000	27289000	9727200	10107000	7454500	628900000	451310000	482100000	16	16	16	25.4	25.4	25.4	106.5	0	42.528	1528200000	34	11	10	12	11	10	12	11	10	12	11	10	13
436	A6H611;Q8BLL4	A6H611;Q8BLL4	Mitochondrial intermediate peptidase	Mipep	sp|A6H611|MIPEP_MOUSE Mitochondrial intermediate peptidase OS=Mus musculus GN=Mipep PE=2 SV=1;tr|Q8BLL4|Q8BLL4_MOUSE Putative uncharacterized protein OS=Mus musculus GN=Mipep PE=2 SV=1	399190000	334170000	456870000	25875000	8678000	7264500	9932000	389630000	517100000	492660000	11	11	11	23.9	23.9	23.9	80.851	0	31.035	1190200000	27	8	8	5	8	8	5	8	8	5	10	8	9
437	A6H614;Q5Y5T2	A6H614;Q5Y5T2	Palmitoyltransferase;Palmitoyltransferase ZDHHC18	Zdhhc18	tr|A6H614|A6H614_MOUSE Palmitoyltransferase (Fragment) OS=Mus musculus GN=Zdhhc18 PE=2 SV=1;sp|Q5Y5T2|ZDH18_MOUSE Palmitoyltransferase ZDHHC18 OS=Mus musculus GN=Zdhhc18 PE=1 SV=4	0	30264000	0	2522000	0	2522000	0	0	35812000	0	1	1	1	5.2	5.2	5.2	29.588	0.00057307	3.4605	30264000	1	0	1	0	0	1	0	0	1	0	0	1	0
438	A6H619-2;A6H619;F7ANA1;Q3TPL9;Q3TPE7;Q3UVM8;Q7TPB8;F6WXS6	A6H619-2;A6H619;F7ANA1	PHD and RING finger domain-containing protein 1	Phrf1	sp|A6H619-2|PHRF1_MOUSE Isoform 2 of PHD and RING finger domain-containing protein 1 OS=Mus musculus GN=Phrf1;sp|A6H619|PHRF1_MOUSE PHD and RING finger domain-containing protein 1 OS=Mus musculus GN=Phrf1 PE=2 SV=2;tr|F7ANA1|F7ANA1_MOUSE PHD and RING finge	202980000	363410000	312180000	14403000	3327600	5957500	5117700	339900000	326240000	306940000	6	6	6	7.9	7.9	7.9	167.29	0	25.272	878570000	17	3	5	5	3	5	5	3	5	5	3	6	8
439	A6H630;A6H630-2;A6H630-4;D6RG65;A6H630-3	A6H630;A6H630-2	Protein-glutamate O-methyltransferase	Armt1	sp|A6H630|CF211_MOUSE UPF0364 protein C6orf211 homolog OS=Mus musculus PE=2 SV=1;sp|A6H630-2|CF211_MOUSE Isoform 2 of UPF0364 protein C6orf211 homolog OS=Mus musculus	3878100000	656380000	290000000	178690000	143640000	24310000	10741000	1948600000	1852700000	1708200000	12	12	12	34.6	34.6	34.6	50.548	0	27.392	4824500000	27	8	10	5	8	10	5	8	10	5	9	13	5
440	A6H659;Q3U1F9	A6H659;Q3U1F9	Phosphoprotein associated with glycosphingolipid-enriched microdomains 1	Pag1	tr|A6H659|A6H659_MOUSE Pag1 protein OS=Mus musculus GN=Pag1 PE=2 SV=1;sp|Q3U1F9|PHAG1_MOUSE Phosphoprotein associated with glycosphingolipid-enriched microdomains 1 OS=Mus musculus GN=Pag1 PE=1 SV=2	182340000	301440000	141620000	32916000	9597100	15865000	7453700	156820000	233110000	216930000	7	7	7	28.9	28.9	28.9	46.549	0	14.955	625400000	12	4	4	3	4	4	3	4	4	3	3	5	4
441	A6H663;Q9JLV1;Q3TAM9;Q9ER87	A6H663;Q9JLV1;Q3TAM9	BAG family molecular chaperone regulator 3	Bag3	tr|A6H663|A6H663_MOUSE BCL2-associated athanogene 3 OS=Mus musculus GN=Bag3 PE=2 SV=1;sp|Q9JLV1|BAG3_MOUSE BAG family molecular chaperone regulator 3 OS=Mus musculus GN=Bag3 PE=1 SV=2;tr|Q3TAM9|Q3TAM9_MOUSE Putative uncharacterized protein OS=Mus musculus	4678800000	4271700000	4049700000	333340000	119970000	109530000	103840000	4233200000	4781500000	4559200000	35	35	35	73.1	73.1	73.1	61.858	0	141.55	13000000000	125	28	26	28	28	26	28	28	26	28	48	38	39
442	A6H669;Q8C1Z7	A6H669;Q8C1Z7	Bardet-Biedl syndrome 4 protein homolog	Bbs4	tr|A6H669|A6H669_MOUSE Bardet-Biedl syndrome 4 (Human) OS=Mus musculus GN=Bbs4 PE=2 SV=1;sp|Q8C1Z7|BBS4_MOUSE Bardet-Biedl syndrome 4 protein homolog OS=Mus musculus GN=Bbs4 PE=1 SV=1	0	18100000	0	624120	0	624120	0	0	17107000	0	1	1	1	2.5	2.5	2.5	58.255	0.0038554	2.0592	18100000	1	0	1	0	0	1	0	0	1	0	0	1	0
443	G5E8Q7;A6H687	G5E8Q7;A6H687	SAC3 domain-containing protein 1	Sac3d1	tr|G5E8Q7|G5E8Q7_MOUSE SAC3 domain containing 1, isoform CRA_c OS=Mus musculus GN=Sac3d1 PE=4 SV=1;sp|A6H687|SAC31_MOUSE SAC3 domain-containing protein 1 OS=Mus musculus GN=Sac3d1 PE=1 SV=1	22800000	18061000	14382000	2511000	1036400	820960	653720	14414000	18898000	29628000	2	2	2	9.8	9.8	9.8	46.412	0	13.246	55243000	4	2	1	1	2	1	1	2	1	1	2	1	1
444	A6H6A9;A6H6A9-2	A6H6A9;A6H6A9-2	Rab GTPase-activating protein 1-like	Rabgap1l	sp|A6H6A9|RBG1L_MOUSE Rab GTPase-activating protein 1-like OS=Mus musculus GN=Rabgap1l PE=1 SV=1;sp|A6H6A9-2|RBG1L_MOUSE Isoform 2 of Rab GTPase-activating protein 1-like OS=Mus musculus GN=Rabgap1l	60432000	11530000	16087000	2001100	1373400	262050	365600	41770000	29727000	34862000	6	2	2	8.1	3.1	3.1	92.403	0.0015137	2.6419	88049000	5	5	4	2	2	1	1	2	1	1	3	1	1
445	A6H6A9-3;Q9CRQ7;A6H6A9-4	A6H6A9-3;Q9CRQ7	Rab GTPase-activating protein 1-like	Rabgap1l	sp|A6H6A9-3|RBG1L_MOUSE Isoform 3 of Rab GTPase-activating protein 1-like OS=Mus musculus GN=Rabgap1l;tr|Q9CRQ7|Q9CRQ7_MOUSE Putative uncharacterized protein (Fragment) OS=Mus musculus GN=Rabgap1l PE=2 SV=1	0	43912000	176800000	6688200	0	1330700	5357600	0	38333000	0	6	4	2	17.8	10.8	4.1	42.753	1	-2	220710000	2	2	4	2	1	2	1	0	1	1	0	1	1
446	B7ZNL7;A6H6B9;Q60821	B7ZNL7;A6H6B9;Q60821	Zinc finger and BTB domain-containing protein 17	Zbtb17	tr|B7ZNL7|B7ZNL7_MOUSE Zinc finger and BTB domain containing 17 OS=Mus musculus GN=Zbtb17 PE=2 SV=1;tr|A6H6B9|A6H6B9_MOUSE Zinc finger and BTB domain containing 17 OS=Mus musculus GN=Zbtb17 PE=2 SV=1;sp|Q60821|ZBT17_MOUSE Zinc finger and BTB domain-contain	9275200	17409000	0	523210	181870	341350	0	9275200	16701000	0	1	1	1	2	2	2	86.741	0.00016108	6.3884	26684000	2	1	1	0	1	1	0	1	1	0	1	1	0
447	F6SJC5;A6H6E9	F6SJC5;A6H6E9	Tetratricopeptide repeat protein 23-like	Ttc23l	tr|F6SJC5|F6SJC5_MOUSE Tetratricopeptide repeat protein 23-like (Fragment) OS=Mus musculus GN=Ttc23l PE=4 SV=1;sp|A6H6E9|TT23L_MOUSE Tetratricopeptide repeat protein 23-like OS=Mus musculus GN=Ttc23l PE=2 SV=1	0	0	5632600	625840	0	0	625840	0	0	5622000	1	1	1	4.5	4.5	4.5	19.796	0.0078893	1.6489	5632600	1	0	0	1	0	0	1	0	0	1	0	0	1
448	A6H6H4;Q6ZWY8	A6H6H4;Q6ZWY8	Thymosin beta-10	Tmsb10	tr|A6H6H4|A6H6H4_MOUSE MCG125727 OS=Mus musculus GN=Tmsb10 PE=2 SV=1;sp|Q6ZWY8|TYB10_MOUSE Thymosin beta-10 OS=Mus musculus GN=Tmsb10 PE=2 SV=3	776370000	0	669100000	361370000	194090000	0	167280000	682630000	0	797380000	1	1	1	31.8	31.8	31.8	5.0256	0.00014719	4.1085	1445500000	3	1	0	1	1	0	1	1	0	1	2	0	1
449	F6UK66;A6H6M8;Q810U5-3;Q810U5;Q3TNK7;Q810U5-2	F6UK66;A6H6M8;Q810U5-3;Q810U5;Q3TNK7;Q810U5-2	Coiled-coil domain-containing protein 50	Ccdc50	tr|F6UK66|F6UK66_MOUSE Coiled-coil domain-containing protein 50 (Fragment) OS=Mus musculus GN=Ccdc50 PE=4 SV=1;tr|A6H6M8|A6H6M8_MOUSE Coiled-coil domain containing 50 OS=Mus musculus GN=Ccdc50 PE=2 SV=1;sp|Q810U5-3|CCD50_MOUSE Isoform 3 of Coiled-coil doma	105270000	186460000	64786000	20972000	6192400	10968000	3810900	112870000	161480000	75249000	4	4	4	18.8	18.8	18.8	29.684	0	10.443	356520000	11	2	4	1	2	4	1	2	4	1	4	5	2
450	Q9CYE8;F6RTH5;E9Q982;Q05CS2;D6REG1;A6H6N9;E9PXW3;G3X9T5;Q9CSP9-3;Q9CSP9-2;Q9CSP9-4;Q9CSP9;D3Z098	Q9CYE8;F6RTH5;E9Q982;Q05CS2;D6REG1;A6H6N9;E9PXW3;G3X9T5;Q9CSP9-3;Q9CSP9-2;Q9CSP9-4;Q9CSP9;D3Z098	Tetratricopeptide repeat protein 14	Ttc14	tr|Q9CYE8|Q9CYE8_MOUSE MCG123425, isoform CRA_d OS=Mus musculus GN=Ttc14 PE=2 SV=1;tr|F6RTH5|F6RTH5_MOUSE Tetratricopeptide repeat protein 14 (Fragment) OS=Mus musculus GN=Ttc14 PE=4 SV=1;tr|E9Q982|E9Q982_MOUSE Tetratricopeptide repeat protein 14 (Fragment	0	10416000	5063300	703620	0	473470	230150	0	12326000	0	2	2	2	7.8	7.8	7.8	37.782	0.0076415	1.6597	15480000	1	0	1	1	0	1	1	0	1	1	0	0	1
451	A6H6S8;Q8CI61	A6H6S8;Q8CI61	BAG family molecular chaperone regulator 4	Bag4	tr|A6H6S8|A6H6S8_MOUSE BCL2-associated athanogene 4 OS=Mus musculus GN=Bag4 PE=2 SV=1;sp|Q8CI61|BAG4_MOUSE BAG family molecular chaperone regulator 4 OS=Mus musculus GN=Bag4 PE=1 SV=2	80238000	225220000	91726000	24824000	5014900	14076000	5732900	124640000	128450000	141150000	4	4	4	12.5	12.5	12.5	49.094	0	19.396	397190000	8	2	4	3	2	4	3	2	4	3	2	4	2
452	A6H8H2;A6H8H2-2;E9Q449;Q3U2Y9;E9Q8V6	A6H8H2;A6H8H2-2;E9Q449	DENN domain-containing protein 4C	Dennd4c	sp|A6H8H2|DEN4C_MOUSE DENN domain-containing protein 4C OS=Mus musculus GN=Dennd4c PE=1 SV=1;sp|A6H8H2-2|DEN4C_MOUSE Isoform 2 of DENN domain-containing protein 4C OS=Mus musculus GN=Dennd4c;tr|E9Q449|E9Q449_MOUSE DENN domain-containing protein 4C OS=Mus m	1937000000	2315200000	1854300000	60460000	19178000	22923000	18359000	2182100000	2143600000	2135100000	36	36	36	29.7	29.7	29.7	211.46	0	156.46	6106400000	83	26	25	23	26	25	23	26	25	23	29	26	28
453	A6MDC5;Q8VE98	A6MDC5;Q8VE98	CD276 antigen	Cd276	tr|A6MDC5|A6MDC5_MOUSE CD276 antigen OS=Mus musculus GN=Cd276 PE=2 SV=1;sp|Q8VE98|CD276_MOUSE CD276 antigen OS=Mus musculus GN=Cd276 PE=1 SV=1	36611000	80364000	30692000	12306000	3050900	6697000	2557700	54892000	57197000	42164000	3	3	3	14.6	14.6	14.6	34.001	0	8.746	147670000	5	2	2	1	2	2	1	2	2	1	2	2	1
454	A6MDD3;Q8R422	A6MDD3;Q8R422	CD109 antigen	Cd109	tr|A6MDD3|A6MDD3_MOUSE CD109 antigen OS=Mus musculus GN=Cd109 PE=2 SV=1;sp|Q8R422|CD109_MOUSE CD109 antigen OS=Mus musculus GN=Cd109 PE=2 SV=1	6518400000	4503500000	5101500000	220870000	89293000	61692000	69884000	5900300000	5517600000	5906300000	39	39	39	35.6	35.6	35.6	161.66	0	175.25	16123000000	137	34	32	36	34	32	36	34	32	36	51	39	47
455	Q7TPU7;E9PV80;A6P3E3;Q61026;Q8BN74;Q8C961;Q8CE59;Q8CAG7;Q8CBM5	Q7TPU7;E9PV80;A6P3E3;Q61026;Q8BN74	Nuclear receptor coactivator 2	Ncoa2	tr|Q7TPU7|Q7TPU7_MOUSE Ncoa2 protein OS=Mus musculus GN=Ncoa2 PE=2 SV=1;tr|E9PV80|E9PV80_MOUSE Nuclear receptor coactivator 2 OS=Mus musculus GN=Ncoa2 PE=1 SV=1;tr|A6P3E3|A6P3E3_MOUSE Glucocorticoid receptor interacting protein 1 OS=Mus musculus GN=Ncoa2 P	53682000	58111000	28316000	2296900	880030	952640	464200	74176000	34759000	32934000	4	4	4	3.7	3.7	3.7	151.38	0.00015538	5.3968	140110000	6	2	3	2	2	3	2	2	3	2	1	3	2
456	A6P3E4;G3X8U9;Q544A0;Q7TSJ7;Q91Y86;D3Z1Z4;A3KBF5	A6P3E4;G3X8U9;Q544A0;Q7TSJ7;Q91Y86;D3Z1Z4;A3KBF5	Mitogen-activated protein kinase;Mitogen-activated protein kinase 8	Mapk8	tr|A6P3E4|A6P3E4_MOUSE JNK1 beta1 protein kinase OS=Mus musculus GN=Mapk8 PE=1 SV=1;tr|G3X8U9|G3X8U9_MOUSE Mitogen activated protein kinase 8, isoform CRA_b OS=Mus musculus GN=Mapk8 PE=4 SV=1;tr|Q544A0|Q544A0_MOUSE Mitogen activated protein kinase 8, isofo	498120000	461450000	455380000	58957000	20755000	19227000	18974000	621970000	426440000	534420000	10	10	5	40.6	40.6	25.3	44.021	0	33.161	1415000000	25	7	7	8	7	7	8	3	5	5	7	9	9
457	A6PWE0;F8VPW8	A6PWE0;F8VPW8		Gm15698	tr|A6PWE0|A6PWE0_MOUSE Protein Gm15698 OS=Mus musculus GN=Gm15698 PE=4 SV=1;tr|F8VPW8|F8VPW8_MOUSE Protein Gm15698 OS=Mus musculus GN=Gm15698 PE=4 SV=1	0	0	26872000	2985800	0	0	2985800	0	0	29250000	2	1	0	9.3	4.3	0	18.413	1	-2	26872000	1	1	1	2	0	0	1	0	0	0	0	0	1
458	A6PWK7;A6PWK8;A6PWK9	A6PWK7;A6PWK8		Atrx	tr|A6PWK7|A6PWK7_MOUSE Transcriptional regulator ATRX (Fragment) OS=Mus musculus GN=Atrx PE=1 SV=1;tr|A6PWK8|A6PWK8_MOUSE Transcriptional regulator ATRX (Fragment) OS=Mus musculus GN=Atrx PE=1 SV=1	42656000	0	0	3281200	3281200	0	0	45651000	0	0	7	2	2	55.8	17.3	17.3	23.618	0.0043599	1.9642	42656000	2	7	4	5	2	0	0	2	0	0	2	0	0
459	B7ZP08;A6PWV5	B7ZP08;A6PWV5	AT-rich interactive domain-containing protein 3C	Arid3c	tr|B7ZP08|B7ZP08_MOUSE AT-rich interactive domain-containing protein 3C OS=Mus musculus GN=Arid3c PE=2 SV=1;sp|A6PWV5|ARI3C_MOUSE AT-rich interactive domain-containing protein 3C OS=Mus musculus GN=Arid3c PE=2 SV=2	76625000	0	0	3648800	3648800	0	0	71027000	0	0	1	1	1	2.6	2.6	2.6	40.549	0.0043582	1.9588	76625000	2	1	0	0	1	0	0	1	0	0	2	0	0
460	A6PWY4-2;A6PWY4;Z4YK23;A6PWY4-3	A6PWY4-2;A6PWY4	WD repeat-containing protein 76	Wdr76	sp|A6PWY4-2|WDR76_MOUSE Isoform 2 of WD repeat-containing protein 76 OS=Mus musculus GN=Wdr76;sp|A6PWY4|WDR76_MOUSE WD repeat-containing protein 76 OS=Mus musculus GN=Wdr76 PE=2 SV=1	235810000	257560000	119950000	21149000	8131400	8881300	4136300	165110000	267050000	200610000	8	8	8	21.8	21.8	21.8	57.96	0	18.689	613320000	14	4	5	5	4	5	5	4	5	5	6	4	4
461	A6X8Z3;Q5SF07-2	A6X8Z3;Q5SF07-2	Insulin-like growth factor 2 mRNA-binding protein 2	Igf2bp2	tr|A6X8Z3|A6X8Z3_MOUSE Insulin-like growth factor 2 mRNA-binding protein 2 OS=Mus musculus GN=Igf2bp2 PE=1 SV=1;sp|Q5SF07-2|IF2B2_MOUSE Isoform 2 of Insulin-like growth factor 2 mRNA-binding protein 2 OS=Mus musculus GN=Igf2bp2	13867000	0	0	513590	513590	0	0	13867000	0	0	14	1	1	32.4	1.7	1.7	58.039	1	-2	13867000	0	13	12	12	1	0	0	1	0	0	0	0	0
462	A6X919;A6X919-2;A6X919-3;P0CW70	A6X919;A6X919-2	Probable C-mannosyltransferase DPY19L1	Dpy19l1	sp|A6X919|D19L1_MOUSE Probable C-mannosyltransferase DPY19L1 OS=Mus musculus GN=Dpy19l1 PE=2 SV=1;sp|A6X919-2|D19L1_MOUSE Isoform 2 of Probable C-mannosyltransferase DPY19L1 OS=Mus musculus GN=Dpy19l1	1034500000	437380000	419120000	55619000	30428000	12864000	12327000	934540000	567130000	570890000	12	12	12	24.5	24.5	24.5	84.186	0	31.901	1891000000	21	8	7	7	8	7	7	8	7	7	7	7	7
463	E9Q5L2;E9PVD2;A6X935-2;A6X935	E9Q5L2;E9PVD2;A6X935-2;A6X935	Inter alpha-trypsin inhibitor, heavy chain 4	Itih4	tr|E9Q5L2|E9Q5L2_MOUSE Inter alpha-trypsin inhibitor, heavy chain 4 OS=Mus musculus GN=Itih4 PE=4 SV=1;tr|E9PVD2|E9PVD2_MOUSE Inter alpha-trypsin inhibitor, heavy chain 4 OS=Mus musculus GN=Itih4 PE=4 SV=1;sp|A6X935-2|ITIH4_MOUSE Isoform 2 of Inter alpha-t	0	0	0	0	0	0	0	0	0	0	1	1	1	1.6	1.6	1.6	102.82	1	-2	0	0	0	0	1	0	0	1	0	0	1	0	0	0
464	A6YR19	A6YR19		Pde8b	tr|A6YR19|A6YR19_MOUSE IBMX-insensitive phosphodiesterase 8B OS=Mus musculus GN=Pde8b PE=2 SV=1	0	0	0	0	0	0	0	0	0	0	1	1	1	1.5	1.5	1.5	88.311	1	-2	0	0	1	1	0	1	1	0	1	1	0	0	0	0
465	A6ZI44;Q9CPQ9;A6ZI46;D3YV98;A6ZI47;Q3UER1;Q3TJ66;Q91Y97	A6ZI44;Q9CPQ9;A6ZI46	Fructose-bisphosphate aldolase	Aldoa;Aldoart1	tr|A6ZI44|A6ZI44_MOUSE Aldolase A splice variant 2 OS=Mus musculus GN=Aldoa PE=2 SV=1;tr|Q9CPQ9|Q9CPQ9_MOUSE Protein Aldoart1 OS=Mus musculus GN=Aldoart1 PE=2 SV=1;tr|A6ZI46|A6ZI46_MOUSE Aldolase A retroprotein 1 OS=Mus musculus GN=Aldoart1 PE=2 SV=1	719450000	454430000	581810000	70228000	28778000	18177000	23272000	568560000	511040000	609880000	31	1	1	75.6	4.8	4.8	45.12	0	11.069	1755700000	11	29	29	28	1	1	1	1	1	1	3	4	4
466	A7ISP9;F8WJ93;Q3UMY5;Q3UMY5-4;Q3UMY5-2;Q3UMY5-3;Q3TGL8	A7ISP9;F8WJ93;Q3UMY5;Q3UMY5-4;Q3UMY5-2;Q3UMY5-3	Echinoderm microtubule-associated protein-like 4	Eml4	tr|A7ISP9|A7ISP9_MOUSE EMAP-like protein 4 OS=Mus musculus GN=Eml4 PE=2 SV=1;tr|F8WJ93|F8WJ93_MOUSE Echinoderm microtubule-associated protein-like 4 OS=Mus musculus GN=Eml4 PE=1 SV=1;sp|Q3UMY5|EMAL4_MOUSE Echinoderm microtubule-associated protein-like 4 OS	3851800000	585230000	3455200000	138460000	67575000	10267000	60618000	2614400000	2452200000	2799000000	17	17	17	22.8	22.8	22.8	108.71	0	71.646	7892200000	34	14	10	11	14	10	11	14	10	11	16	9	9
467	A7M7S2;Q8VIJ8;Q8BZ59;Q8BXG6	A7M7S2;Q8VIJ8;Q8BZ59;Q8BXG6	Nitrogen permease regulator 3-like protein	Nprl3	tr|A7M7S2|A7M7S2_MOUSE Nitrogen permease regulator 3-like protein OS=Mus musculus GN=Nprl3 PE=4 SV=1;sp|Q8VIJ8|NPRL3_MOUSE Nitrogen permease regulator 3-like protein OS=Mus musculus GN=Nprl3 PE=2 SV=1;tr|Q8BZ59|Q8BZ59_MOUSE Putative uncharacterized protein	18653000	44083000	17695000	2978900	690860	1632700	655370	27242000	27592000	26139000	3	3	3	7.4	7.4	7.4	60.818	0.00070323	3.09	80431000	4	1	3	1	1	3	1	1	3	1	1	2	1
468	A7MCT8;Q3UNI1;Q53Z05;Q923E4-2;Q923E4;F6YAQ3	A7MCT8;Q3UNI1;Q53Z05;Q923E4-2;Q923E4;F6YAQ3	NAD-dependent protein deacetylase sirtuin-1;SirtT1 75 kDa fragment	Sirt1	tr|A7MCT8|A7MCT8_MOUSE Sirt1 protein OS=Mus musculus GN=Sirt1 PE=2 SV=1;tr|Q3UNI1|Q3UNI1_MOUSE NAD-dependent protein deacetylase sirtuin-1 OS=Mus musculus GN=Sirt1 PE=2 SV=1;tr|Q53Z05|Q53Z05_MOUSE Sir2alpha OS=Mus musculus GN=Sirt1 PE=2 SV=1;sp|Q923E4-2|SI	55639000	11420000	0	2235300	1854600	380660	0	0	13024000	0	2	2	2	6.1	6.1	6.1	64.114	0.0015219	2.7496	67059000	2	1	1	0	1	1	0	1	1	0	1	1	0
469	A7VJ98;Q9CQI3;Q80X87;D3YY93;D3Z2F6;D3YY16;A7VJA4;Q9ERL7;Q3U6A4	A7VJ98;Q9CQI3;Q80X87	Glia maturation factor beta	Gmfb	tr|A7VJ98|A7VJ98_MOUSE Glia maturation factor beta OS=Mus musculus GN=Gmfb PE=2 SV=1;sp|Q9CQI3|GMFB_MOUSE Glia maturation factor beta OS=Mus musculus GN=Gmfb PE=1 SV=3;tr|Q80X87|Q80X87_MOUSE Glia maturation factor, beta OS=Mus musculus GN=Gmfb PE=2 SV=1	3516800000	1829000000	2987500000	833330000	351680000	182900000	298750000	3558300000	1871600000	2986500000	7	7	7	72.5	72.5	72.5	16.722	0	52.457	8333300000	23	6	4	6	6	4	6	6	4	6	10	6	7
470	Q3UDG0;Q3THE7;A7VL18;Q3U367;Q3TG52;Q9JLJ2;Q3TMT4;Q3V1N7;Q9CRH9	Q3UDG0;Q3THE7;A7VL18;Q3U367;Q3TG52;Q9JLJ2;Q3TMT4;Q3V1N7	4-trimethylaminobutyraldehyde dehydrogenase	Aldh9a1	tr|Q3UDG0|Q3UDG0_MOUSE Putative uncharacterized protein OS=Mus musculus GN=Aldh9a1 PE=2 SV=1;tr|Q3THE7|Q3THE7_MOUSE Putative uncharacterized protein OS=Mus musculus GN=Aldh9a1 PE=2 SV=1;tr|A7VL18|A7VL18_MOUSE Gamma-aminobutyraldehyde dehydrogenase OS=Mus m	6756700000	5638900000	5743900000	625500000	232990000	194450000	198070000	6754900000	6104300000	6918500000	22	22	22	55.7	55.7	55.7	53.48	0	139.73	18140000000	85	19	19	18	19	19	18	19	19	18	31	25	29
471	F6QTQ3;A7YB12;Q91WK7	F6QTQ3;A7YB12;Q91WK7	Ankyrin repeat domain-containing protein 54	Ankrd54	tr|F6QTQ3|F6QTQ3_MOUSE Ankyrin repeat domain-containing protein 54 (Fragment) OS=Mus musculus GN=Ankrd54 PE=4 SV=1;tr|A7YB12|A7YB12_MOUSE Ankyrin repeat domain 54, isoform CRA_c OS=Mus musculus GN=Ankrd54 PE=2 SV=1;sp|Q91WK7|ANR54_MOUSE Ankyrin repeat doma	0	21672000	22726000	6342500	0	3096000	3246500	0	20483000	25788000	1	1	1	19.3	19.3	19.3	9.5939	0.00014562	3.8315	44398000	2	0	1	1	0	1	1	0	1	1	0	1	1
472	A7YY80;D0VYV7;B6ZHD1;V6BQR3;Q8BGK4;Q8BT38;A7MCX4	A7YY80;D0VYV7;B6ZHD1;V6BQR3;Q8BGK4		Epb4.1l3	tr|A7YY80|A7YY80_MOUSE 130kDa Protein 4.1B MEF cell isoform OS=Mus musculus GN=Epb4.1l3 PE=2 SV=1;tr|D0VYV7|D0VYV7_MOUSE Erythrocyte protein band 4.1-like 3 isoform C OS=Mus musculus GN=Epb4.1l3 PE=2 SV=1;tr|B6ZHD1|B6ZHD1_MOUSE Erythrocyte protein band 4.1	8061500000	8997700000	8285900000	478210000	152100000	169770000	156340000	8200400000	8533000000	8738200000	42	38	0	58.2	54.1	0	97.596	0	231.79	25345000000	165	33	37	34	29	33	30	0	0	0	53	54	58
473	G3UXG8;F6RYG0;A8C1S6;Q6PGD0	G3UXG8;F6RYG0;A8C1S6;Q6PGD0	All-trans retinoic acid-induced differentiation factor	Atraid	tr|G3UXG8|G3UXG8_MOUSE All-trans retinoic acid-induced differentiation factor (Fragment) OS=Mus musculus GN=Atraid PE=4 SV=1;tr|F6RYG0|F6RYG0_MOUSE All-trans retinoic acid-induced differentiation factor (Fragment) OS=Mus musculus GN=Atraid PE=4 SV=1;tr|A8C	440720	101380000	0	12728000	55090	12673000	0	516510	97264000	0	1	1	1	7	7	7	15.138	0.0016349	2.4812	101820000	1	1	1	0	1	1	0	1	1	0	0	1	0
474	A8C1T7;Q91XD7	A8C1T7;Q91XD7	Cysteine-rich with EGF-like domain protein 1	Creld1	tr|A8C1T7|A8C1T7_MOUSE Cysteine-rich with EGF-like domains 1 OS=Mus musculus GN=Creld1 PE=2 SV=1;sp|Q91XD7|CREL1_MOUSE Cysteine-rich with EGF-like domain protein 1 OS=Mus musculus GN=Creld1 PE=2 SV=1	799940000	1070800000	968180000	123430000	34780000	46555000	42095000	828050000	1137900000	1147400000	10	10	10	36	36	36	45.717	0	51.673	2838900000	37	8	8	7	8	8	7	8	8	7	12	13	12
475	A8C1U1;Q80XR4;Q545L1;Q3TXC6;Q3TVZ0;Q3THL4;Q3U364;Q9QY33;Q8BPU2	A8C1U1;Q80XR4;Q545L1;Q3TXC6;Q3TVZ0;Q3THL4;Q3U364;Q9QY33;Q8BPU2	Tetraspanin;Tetraspanin-3	Tspan3	tr|A8C1U1|A8C1U1_MOUSE H41D4 protein (Fragment) OS=Mus musculus GN=Tspan3 PE=2 SV=1;tr|Q80XR4|Q80XR4_MOUSE Tetraspanin 3 OS=Mus musculus GN=Tspan3 PE=2 SV=1;tr|Q545L1|Q545L1_MOUSE Tetraspanin OS=Mus musculus GN=Tspan3 PE=2 SV=1;tr|Q3TXC6|Q3TXC6_MOUSE Putat	170640000	349220000	396240000	101790000	18960000	38802000	44027000	205630000	297280000	371550000	2	2	2	9.2	9.2	9.2	27.599	0.00015242	4.8812	916100000	6	1	2	2	1	2	2	1	2	2	1	2	3
476	A8C756;A8C756-2;A8C756-3;A8C756-4;A8C756-5	A8C756	Thyroid adenoma-associated protein homolog	Thada	sp|A8C756|THADA_MOUSE Thyroid adenoma-associated protein homolog OS=Mus musculus GN=Thada PE=2 SV=1	2012100000	1589100000	1111300000	44043000	18805000	14851000	10386000	1851800000	1548200000	1592900000	30	30	30	20.2	20.2	20.2	217.29	0	102.18	4712600000	78	24	23	19	24	23	19	24	23	19	24	29	25
477	A8CVP4;A8CVP1;Q4ZJB3;E9QP62;Q99JW4;Q9D7B2;Q91XD2	A8CVP4;A8CVP1;Q4ZJB3;E9QP62;Q99JW4;Q9D7B2	LIM and senescent cell antigen-like-containing domain protein 1	Lims1	tr|A8CVP4|A8CVP4_MOUSE LIM and senescent cell antigen-like domains 1 isoform B OS=Mus musculus GN=Lims1 PE=2 SV=1;tr|A8CVP1|A8CVP1_MOUSE LIM and senescent cell antigen-like domains 1 isoform D OS=Mus musculus GN=Lims1 PE=2 SV=1;tr|Q4ZJB3|Q4ZJB3_MOUSE Lims	2360400000	1727200000	2281600000	335220000	124230000	90903000	120080000	2282700000	1844800000	2344400000	14	14	14	47.4	47.4	47.4	37.241	0	36.82	6369100000	56	10	11	11	10	11	11	10	11	11	20	17	19
478	Q542M5;A8DIL0;Q3U2W5;Q9JL15;Q8C6H0	Q542M5;A8DIL0;Q3U2W5;Q9JL15;Q8C6H0	Galectin;Galectin-8	Lgals8	tr|Q542M5|Q542M5_MOUSE Galectin OS=Mus musculus GN=Lgals8 PE=2 SV=1;tr|A8DIL0|A8DIL0_MOUSE Galectin OS=Mus musculus GN=Lgals8 PE=2 SV=1;tr|Q3U2W5|Q3U2W5_MOUSE Galectin (Fragment) OS=Mus musculus GN=Lgals8 PE=2 SV=1;sp|Q9JL15|LEG8_MOUSE Galectin-8 OS=Mus mu	0	56567000	0	2693700	0	2693700	0	0	55136000	0	2	2	2	7.3	7.3	7.3	36.161	0.00014618	3.9257	56567000	2	0	2	0	0	2	0	0	2	0	0	2	0
479	A8IP69;P61982	A8IP69;P61982	14-3-3 protein gamma;14-3-3 protein gamma, N-terminally processed	Ywhag	tr|A8IP69|A8IP69_MOUSE 14-3-3 protein gamma subtype OS=Mus musculus GN=Ywhag PE=2 SV=1;sp|P61982|1433G_MOUSE 14-3-3 protein gamma OS=Mus musculus GN=Ywhag PE=1 SV=2	16257000000	15890000000	17476000000	2756900000	903180000	882770000	970900000	17423000000	13184000000	17049000000	18	15	13	76.5	70.4	62.8	28.302	0	129.31	49623000000	134	17	18	16	14	15	13	12	13	11	49	42	43
480	A8Y5E9;B2KGA7;Q505B7-2;Q505B7	A8Y5E9;B2KGA7;Q505B7-2;Q505B7	Protein archease	Zbtb8os	tr|A8Y5E9|A8Y5E9_MOUSE Protein archease OS=Mus musculus GN=Zbtb8os PE=4 SV=1;tr|B2KGA7|B2KGA7_MOUSE Protein archease OS=Mus musculus GN=Zbtb8os PE=4 SV=1;sp|Q505B7-2|ARCH_MOUSE Isoform 2 of Protein archease OS=Mus musculus GN=Zbtb8os;sp|Q505B7|ARCH_MOUSE P	306530000	311570000	276340000	127780000	43790000	44510000	39477000	325380000	314770000	266730000	2	2	2	19.9	19.9	19.9	15.677	0	8.8154	894450000	8	2	2	2	2	2	2	2	2	2	2	3	3
481	A8Y5J3;Q9CWS4;D6RH69	A8Y5J3;Q9CWS4	Integrator complex subunit 11	Cpsf3l	tr|A8Y5J3|A8Y5J3_MOUSE Integrator complex subunit 11 OS=Mus musculus GN=Cpsf3l PE=4 SV=1;sp|Q9CWS4|INT11_MOUSE Integrator complex subunit 11 OS=Mus musculus GN=Cpsf3l PE=2 SV=1	600220000	770460000	692820000	58957000	17149000	22013000	19795000	703000000	688160000	638270000	12	12	12	28.5	28.5	28.5	65.42	0	30.586	2063500000	31	9	7	8	9	7	8	9	7	8	9	10	12
482	Q3TBI1;A9C437;Q9R0A1	Q3TBI1;A9C437;Q9R0A1	Chloride channel protein;Chloride channel protein 2	Clcn2	tr|Q3TBI1|Q3TBI1_MOUSE Putative uncharacterized protein (Fragment) OS=Mus musculus GN=Clcn2 PE=2 SV=1;tr|A9C437|A9C437_MOUSE Chloride channel protein 2 OS=Mus musculus GN=Clcn2 PE=4 SV=1;sp|Q9R0A1|CLCN2_MOUSE Chloride channel protein 2 OS=Mus musculus GN=C	0	13704000	0	391550	0	391550	0	0	15629000	0	1	1	1	2.1	2.1	2.1	97.533	0.00070413	3.1111	13704000	1	0	1	0	0	1	0	0	1	0	0	1	0
483	A9C491;Q8VE73;Q8VE73-3;Q3U270;Q3UMJ6;E9Q6H4;Q8BUW2;F6Q1R4	A9C491;Q8VE73;Q8VE73-3	Cullin-7	Cul7	tr|A9C491|A9C491_MOUSE Cullin 7 OS=Mus musculus GN=Cul7 PE=2 SV=1;sp|Q8VE73|CUL7_MOUSE Cullin-7 OS=Mus musculus GN=Cul7 PE=1 SV=2;sp|Q8VE73-3|CUL7_MOUSE Isoform 2 of Cullin-7 OS=Mus musculus GN=Cul7	297390000	257790000	564360000	11195000	2973900	2577900	5643600	431180000	328680000	444760000	16	16	14	13.4	13.4	12.5	192.29	0	40.702	1119500000	25	9	10	8	9	10	8	7	9	7	11	8	6
484	A9CLV6;Q9QZI8;E9Q553;Q8C5F9;E9PY81	A9CLV6;Q9QZI8;E9Q553;Q8C5F9;E9PY81	Serine incorporator 1	Serinc1	tr|A9CLV6|A9CLV6_MOUSE Axotomy induced glycoprotein 2 OS=Mus musculus GN=Serinc1 PE=2 SV=1;sp|Q9QZI8|SERC1_MOUSE Serine incorporator 1 OS=Mus musculus GN=Serinc1 PE=1 SV=1;tr|E9Q553|E9Q553_MOUSE Serine incorporator 1 OS=Mus musculus GN=Serinc1 PE=4 SV=1;tr	106350000	194020000	217760000	27270000	5597200	10212000	11461000	172470000	171120000	211310000	2	2	2	5.5	5.5	5.5	50.508	0.00015605	5.5057	518130000	5	1	2	2	1	2	2	1	2	2	1	1	3
485	A9UGK3;Q6VN19	A9UGK3;Q6VN19	Ran-binding protein 10	Ranbp10	tr|A9UGK3|A9UGK3_MOUSE RAN binding protein 10 OS=Mus musculus GN=Ranbp10 PE=2 SV=1;sp|Q6VN19|RBP10_MOUSE Ran-binding protein 10 OS=Mus musculus GN=Ranbp10 PE=1 SV=2	291680000	337130000	170600000	33309000	12153000	14047000	7108200	241580000	290400000	302430000	10	8	8	22.3	18.5	18.5	67.188	0	25.231	799410000	14	8	8	2	6	6	1	6	6	1	6	5	3
486	Q3UIV8;A9YZW8;B0QZV7;Q99MK9-2;Q99MK9	Q3UIV8;A9YZW8;B0QZV7;Q99MK9-2;Q99MK9	Ras association domain-containing protein 1	Rassf1	tr|Q3UIV8|Q3UIV8_MOUSE Ras association domain-containing protein 1 OS=Mus musculus GN=Rassf1 PE=2 SV=1;tr|A9YZW8|A9YZW8_MOUSE RASSF1A tumor suppressor OS=Mus musculus GN=Rassf1 PE=2 SV=1;tr|B0QZV7|B0QZV7_MOUSE Ras association domain-containing protein 1 OS	0	12487000	22314000	1933400	0	693700	1239700	0	15145000	18629000	2	2	2	7.7	7.7	7.7	25.7	0.0015085	2.5951	34801000	3	0	1	2	0	1	2	0	1	2	0	1	2
487	B0FTY3;Q8R1N4;Q8R1N4-2;Q8R1N4-3;B1AS63;Q8R1N4-4	B0FTY3;Q8R1N4;Q8R1N4-2;Q8R1N4-3	NudC domain-containing protein 3	Nudcd3	tr|B0FTY3|B0FTY3_MOUSE NudC domain containing 3, isoform CRA_a OS=Mus musculus GN=Nudcd3 PE=2 SV=1;sp|Q8R1N4|NUDC3_MOUSE NudC domain-containing protein 3 OS=Mus musculus GN=Nudcd3 PE=2 SV=3;sp|Q8R1N4-2|NUDC3_MOUSE Isoform 2 of NudC domain-containing protei	478300000	316320000	877180000	69658000	19929000	13180000	36549000	592760000	429270000	748680000	12	12	12	44.9	44.9	44.9	40.89	0	38.655	1671800000	22	6	4	8	6	4	8	6	4	8	7	5	10
488	B0LAA9	B0LAA9	Phosphoglycerate kinase	Pgk1	tr|B0LAA9|B0LAA9_MOUSE Phosphoglycerate kinase (Fragment) OS=Mus musculus GN=Pgk1 PE=2 SV=1	236650000	196550000	66184000	71341000	33807000	28079000	9454900	259250000	185360000	109850000	8	1	1	71.1	26.3	26.3	8.484	1	-2	499390000	5	8	8	8	1	1	1	1	1	1	2	3	0
489	B0LAE4;Q3TQE3;Q8C1Y9;Q80ZW9;Q3TIC7;Q9JKW0;Q3UBA1;Q3THR3	B0LAE4;Q3TQE3;Q8C1Y9;Q80ZW9;Q3TIC7;Q9JKW0;Q3UBA1;Q3THR3	ADP-ribosylation factor-like protein 6-interacting protein 1	Arl6ip1	tr|B0LAE4|B0LAE4_MOUSE ADP-ribosylation factor-like 6 interacting protein 1 (Fragment) OS=Mus musculus GN=Arl6ip1 PE=2 SV=1;tr|Q3TQE3|Q3TQE3_MOUSE Putative uncharacterized protein (Fragment) OS=Mus musculus GN=Arl6ip1 PE=2 SV=1;tr|Q8C1Y9|Q8C1Y9_MOUSE Putat	1189700000	2013000000	1527700000	788400000	198280000	335490000	254620000	1321300000	1493700000	2300800000	4	4	4	38	38	38	15.907	0	6.8255	4730400000	26	4	4	3	4	4	3	4	4	3	10	9	7
490	B0LDS3;Q8R3V5-1;Q8R3V5;A2AWI7;A2AWI9;Q8R3V5-3	B0LDS3;Q8R3V5-1;Q8R3V5;A2AWI7;A2AWI9;Q8R3V5-3	Endophilin-B2	Sh3glb2	tr|B0LDS3|B0LDS3_MOUSE Stimulator of prostatic adenocarcinoma-specific T-cells-1 OS=Mus musculus GN=Sh3glb2 PE=2 SV=1;sp|Q8R3V5-1|SHLB2_MOUSE Isoform 1 of Endophilin-B2 OS=Mus musculus GN=Sh3glb2;sp|Q8R3V5|SHLB2_MOUSE Endophilin-B2 OS=Mus musculus GN=Sh3gl	411480000	335560000	244040000	45049000	18703000	15253000	11093000	365220000	309280000	305740000	12	11	11	38.2	36.2	36.2	44.097	0	91.824	991070000	19	5	9	5	4	9	5	4	9	5	6	8	5
491	B0QZL1	B0QZL1	Enolase	Eno1	tr|B0QZL1|B0QZL1_MOUSE Enolase (Fragment) OS=Mus musculus GN=Eno1 PE=1 SV=1	12606000	7949100	12026000	2506200	969720	611470	925060	14774000	9065700	17064000	16	1	1	78.3	6.3	6.3	23.935	1	-2	32581000	3	16	16	16	1	1	1	1	1	1	1	1	1
492	Q8CHR4;O35619;B0QZN5;P63044	Q8CHR4;O35619;B0QZN5;P63044	Vesicle-associated membrane protein 2	Vamp2	tr|Q8CHR4|Q8CHR4_MOUSE Vesicle-associated membrane protein 2 OS=Mus musculus GN=Vamp2 PE=2 SV=2;tr|O35619|O35619_MOUSE Vesicle associated membrane protein 2 OS=Mus musculus GN=Vamp2 PE=2 SV=1;tr|B0QZN5|B0QZN5_MOUSE Vesicle-associated membrane protein 2 OS=	73297000	94562000	56424000	44857000	14659000	18912000	11285000	86460000	89373000	64029000	4	2	2	59.5	38.8	38.8	12.691	0	38.816	224280000	4	4	4	4	2	2	2	2	2	2	1	2	1
493	H3BJY1;H3BJ78;H3BKF4;H3BIZ8;B0QZP8;O55101	H3BJY1;H3BJ78;H3BKF4;H3BIZ8;B0QZP8;O55101	Synaptogyrin-2	Syngr2;Gm20708	tr|H3BJY1|H3BJY1_MOUSE Synaptogyrin-2 OS=Mus musculus GN=Syngr2 PE=4 SV=1;tr|H3BJ78|H3BJ78_MOUSE Synaptogyrin-2 (Fragment) OS=Mus musculus GN=Syngr2 PE=4 SV=1;tr|H3BKF4|H3BKF4_MOUSE Protein Gm20708 OS=Mus musculus GN=Gm20708 PE=4 SV=1;tr|H3BIZ8|H3BIZ8_MOUS	121370000	43849000	183800000	116340000	40458000	14616000	61266000	172630000	29240000	199680000	1	1	1	21.7	21.7	21.7	4.6893	0.0011158	2.905	349020000	3	1	1	1	1	1	1	1	1	1	1	1	1
494	Q8BWQ2;Q8BVY4;Q8BU36;B0QZW5;B0QZW4	Q8BWQ2;Q8BVY4;Q8BU36;B0QZW5;B0QZW4		Supt3	tr|Q8BWQ2|Q8BWQ2_MOUSE Putative uncharacterized protein OS=Mus musculus GN=Supt3 PE=2 SV=1;tr|Q8BVY4|Q8BVY4_MOUSE Protein Supt3 OS=Mus musculus GN=Supt3 PE=1 SV=1;tr|Q8BU36|Q8BU36_MOUSE Putative uncharacterized protein OS=Mus musculus GN=Supt3 PE=2 SV=1;tr	42922000	27066000	43337000	6666100	2524800	1592100	2549200	49261000	29801000	35803000	1	1	1	3.2	3.2	3.2	41.217	0.00028998	3.7161	113320000	3	1	1	1	1	1	1	1	1	1	1	1	1
495	B0R081;Q3TFW3;Q3T9Q9;Q0P648;Q9D9I4;B0R080	B0R081;Q3TFW3;Q3T9Q9;Q0P648;Q9D9I4;B0R080	TBC1 domain family member 20	Tbc1d20	tr|B0R081|B0R081_MOUSE TBC1 domain family member 20 (Fragment) OS=Mus musculus GN=Tbc1d20 PE=4 SV=1;tr|Q3TFW3|Q3TFW3_MOUSE Putative uncharacterized protein OS=Mus musculus GN=Tbc1d20 PE=2 SV=1;tr|Q3T9Q9|Q3T9Q9_MOUSE Putative uncharacterized protein OS=Mus	0	32079000	30302000	5671100	0	2916300	2754800	0	16168000	49183000	2	2	2	15.5	15.5	15.5	18.078	0.00015186	4.7865	62382000	4	1	2	1	1	2	1	1	2	1	1	2	1
496	B0R091;P61022;B0R092	B0R091;P61022	Calcineurin B homologous protein 1	Chp1	tr|B0R091|B0R091_MOUSE Calcineurin B homologous protein 1 OS=Mus musculus GN=Chp1 PE=4 SV=1;sp|P61022|CHP1_MOUSE Calcineurin B homologous protein 1 OS=Mus musculus GN=Chp1 PE=1 SV=2	434980000	670560000	557330000	103930000	27186000	41910000	34833000	645870000	571880000	493660000	8	8	8	56	56	56	21.997	0	20.469	1662900000	15	5	7	5	5	7	5	5	7	5	5	5	5
497	B0R0C7;Q6I682;B0R0D0;Q8BHD8	B0R0C7;Q6I682;B0R0D0;Q8BHD8	Protein-L-isoaspartate O-methyltransferase domain-containing protein 2	Pcmtd2	tr|B0R0C7|B0R0C7_MOUSE Protein-L-isoaspartate O-methyltransferase domain-containing protein 2 OS=Mus musculus GN=Pcmtd2 PE=4 SV=1;tr|Q6I682|Q6I682_MOUSE MKIAA3003 protein (Fragment) OS=Mus musculus GN=Pcmtd2 PE=2 SV=1;tr|B0R0D0|B0R0D0_MOUSE Protein-L-isoas	0	89759000	1021100000	69432000	0	5610000	63822000	0	14991000	1088200000	2	2	2	16.7	16.7	16.7	30.697	0.0028165	2.2172	1110900000	3	0	2	1	0	2	1	0	2	1	0	2	1
498	B0R0Y8	B0R0Y8		Sh3kbp1	tr|B0R0Y8|B0R0Y8_MOUSE SH3 domain-containing kinase-binding protein 1 (Fragment) OS=Mus musculus GN=Sh3kbp1 PE=4 SV=1	58532000	25011000	41826000	10447000	4877700	2084300	3485500	43504000	30926000	53932000	11	1	1	69.9	6.7	6.7	22.409	0.00057184	3.4261	125370000	4	8	11	8	1	1	1	1	1	1	2	1	1
499	B9EK88;B0V2M3;Q99PP2	B9EK88;B0V2M3;Q99PP2	Zinc finger protein 318	Zfp318;Znf318	tr|B9EK88|B9EK88_MOUSE Zinc finger protein 318 OS=Mus musculus GN=Zfp318 PE=2 SV=1;tr|B0V2M3|B0V2M3_MOUSE Zinc finger protein 318 OS=Mus musculus GN=Zfp318 PE=4 SV=1;sp|Q99PP2|ZN318_MOUSE Zinc finger protein 318 (Fragment) OS=Mus musculus GN=Znf318 PE=1 SV	0	17125000	10629000	237220	0	146370	90845	0	14404000	17424000	2	2	2	1.2	1.2	1.2	223.92	0.0043622	1.9713	27754000	3	0	2	1	0	2	1	0	2	1	0	2	1
500	B0V2M9;Q91VY5-2;Q91VY5;Q8BLR3;Q8C149;F7BTY2	B0V2M9;Q91VY5-2;Q91VY5;Q8BLR3;Q8C149;F7BTY2	Lysine-specific demethylase 4B	Kdm4b	tr|B0V2M9|B0V2M9_MOUSE Lysine-specific demethylase 4B OS=Mus musculus GN=Kdm4b PE=4 SV=1;sp|Q91VY5-2|KDM4B_MOUSE Isoform 2 of Lysine-specific demethylase 4B OS=Mus musculus GN=Kdm4b;sp|Q91VY5|KDM4B_MOUSE Lysine-specific demethylase 4B OS=Mus musculus GN=Kd	52777000	74453000	108700000	5019700	1122900	1584100	2312700	78078000	70246000	75428000	4	4	4	6	6	6	114.26	0	14.872	235930000	7	2	3	3	2	3	3	2	3	3	1	3	3
501	B0V2N1-4;B0V2N1-3;B0V2N1-6;B0V2N1-2;B0V2N1;Q3UNN3;B0V2N1-5;Q3TP78;Q63847;Q8C922	B0V2N1-4;B0V2N1-3;B0V2N1-6;B0V2N1-2;B0V2N1;Q3UNN3	Receptor-type tyrosine-protein phosphatase S	Ptprs	sp|B0V2N1-4|PTPRS_MOUSE Isoform 4 of Receptor-type tyrosine-protein phosphatase S OS=Mus musculus GN=Ptprs;sp|B0V2N1-3|PTPRS_MOUSE Isoform 3 of Receptor-type tyrosine-protein phosphatase S OS=Mus musculus GN=Ptprs;sp|B0V2N1-6|PTPRS_MOUSE Isoform 6 of Recep	95543000	198710000	113500000	5295600	1240800	2580700	1474100	192410000	127030000	138160000	10	9	8	11.6	10.8	9.9	167.87	0	17.154	407760000	17	3	8	6	3	7	6	3	6	5	3	7	7
502	B0V2Q7;Q3UN02;B0V2Q9	B0V2Q7;Q3UN02	Lysocardiolipin acyltransferase 1	Lclat1	tr|B0V2Q7|B0V2Q7_MOUSE Lclat1 protein OS=Mus musculus GN=Lclat1 PE=2 SV=1;sp|Q3UN02|LCLT1_MOUSE Lysocardiolipin acyltransferase 1 OS=Mus musculus GN=Lclat1 PE=2 SV=2	1225000000	814910000	1186100000	169790000	64474000	42890000	62424000	1118100000	1216400000	1215700000	9	9	9	29.3	29.3	29.3	44.399	0	30.145	3226000000	37	6	7	8	6	7	8	6	7	8	14	11	12
503	B0V3P3;Q9D8S2;Q7TMS3;Q9WV76;Q7TND3;Q3TN27;B0V3P4;Q9CW72	B0V3P3;Q9D8S2;Q7TMS3;Q9WV76;Q7TND3;Q3TN27;B0V3P4	AP complex subunit beta;AP-4 complex subunit beta-1	Ap4b1	tr|B0V3P3|B0V3P3_MOUSE AP-4 complex subunit beta-1 OS=Mus musculus GN=Ap4b1 PE=4 SV=1;tr|Q9D8S2|Q9D8S2_MOUSE Putative uncharacterized protein OS=Mus musculus GN=Ap4b1 PE=2 SV=1;tr|Q7TMS3|Q7TMS3_MOUSE Ap4b1 protein OS=Mus musculus GN=Ap4b1 PE=2 SV=1;sp|Q9WV	37363000	50543000	53684000	3146500	830290	1123200	1193000	56703000	33020000	53756000	7	7	7	17.8	17.8	17.8	74.668	0	15.225	141590000	14	4	6	4	4	6	4	4	6	4	4	6	4
504	B1APX2;Q3UE31;Q69ZV3	B1APX2;Q3UE31;Q69ZV3	Uncharacterized protein KIAA0930 homolog	5031439G07Rik;mKIAA0930	tr|B1APX2|B1APX2_MOUSE Protein 5031439G07Rik OS=Mus musculus GN=5031439G07Rik PE=1 SV=1;sp|Q3UE31|K0930_MOUSE Uncharacterized protein KIAA0930 homolog OS=Mus musculus PE=1 SV=2;tr|Q69ZV3|Q69ZV3_MOUSE MKIAA0930 protein (Fragment) OS=Mus musculus GN=mKIAA093	68987000	214030000	93970000	13000000	2378900	7380400	3240300	97082000	174620000	114290000	4	4	4	12.5	12.5	12.5	50.235	0.00015755	5.7585	376990000	7	1	4	1	1	4	1	1	4	1	2	4	1
505	B1AQ75	B1AQ75	Keratin, type I cuticular Ha6	Krt36	sp|B1AQ75|KRT36_MOUSE Keratin, type I cuticular Ha6 OS=Mus musculus GN=Krt36 PE=1 SV=1	11887000	516170	0	413450	396240	17206	0	13966000	0	0	4	1	1	10.8	4.9	4.9	52.79	1	-2	12403000	0	3	3	2	1	1	0	1	1	0	0	0	0
506	Q3V299;B1AQD9;Q9Z2R6	Q3V299;B1AQD9;Q9Z2R6	Protein unc-119 homolog A	Unc119	tr|Q3V299|Q3V299_MOUSE Unc-119 homolog (C. elegans), isoform CRA_a OS=Mus musculus GN=Unc119 PE=2 SV=1;tr|B1AQD9|B1AQD9_MOUSE Protein unc-119 homolog A OS=Mus musculus GN=Unc119 PE=1 SV=1;sp|Q9Z2R6|U119A_MOUSE Protein unc-119 homolog A OS=Mus musculus GN=U	60568000	101290000	45752000	12212000	3562800	5958200	2691300	78329000	72814000	52694000	2	2	2	13.3	13.3	13.3	27.01	0.00015509	5.3328	207610000	6	1	2	1	1	2	1	1	2	1	1	4	1
507	B1AQJ2;B0QZF8;Q8BV95;Q3TMY1	B1AQJ2;B0QZF8	Ubiquitin carboxyl-terminal hydrolase 36	Usp36	sp|B1AQJ2|UBP36_MOUSE Ubiquitin carboxyl-terminal hydrolase 36 OS=Mus musculus GN=Usp36 PE=2 SV=1;tr|B0QZF8|B0QZF8_MOUSE Ubiquitin carboxyl-terminal hydrolase 36 (Fragment) OS=Mus musculus GN=Usp36 PE=4 SV=1	553310000	490250000	210820000	19006000	8383500	7428100	3194200	396070000	353870000	471210000	10	10	10	12.4	12.4	12.4	119.91	0	21.033	1254400000	22	7	7	7	7	7	7	7	7	7	7	7	8
508	Q5U432;Q3UZ24;B1AQP7	Q5U432;Q3UZ24;B1AQP7		Apol7b;Apol7e	tr|Q5U432|Q5U432_MOUSE Apolipoprotein L 7b OS=Mus musculus GN=Apol7b PE=2 SV=1;tr|Q3UZ24|Q3UZ24_MOUSE Protein Apol7e OS=Mus musculus GN=Apol7e PE=2 SV=1;tr|B1AQP7|B1AQP7_MOUSE Protein Apol7b OS=Mus musculus GN=Apol7b PE=4 SV=1	0	0	149760000	6511200	0	0	6511200	0	0	161030000	1	1	1	2.2	2.2	2.2	40.211	0.0080134	1.6411	149760000	1	0	0	1	0	0	1	0	0	1	0	0	1
509	F8VQ11;B1AQY2;Q69ZH9;D6RDB5;Q69ZH9-2	F8VQ11;B1AQY2;Q69ZH9	Rho GTPase-activating protein 23	Arhgap23	tr|F8VQ11|F8VQ11_MOUSE Rho GTPase-activating protein 23 OS=Mus musculus GN=Arhgap23 PE=4 SV=1;tr|B1AQY2|B1AQY2_MOUSE Rho GTPase-activating protein 23 OS=Mus musculus GN=Arhgap23 PE=4 SV=1;sp|Q69ZH9|RHG23_MOUSE Rho GTPase-activating protein 23 OS=Mus muscul	441130000	38042000	20880000	6250700	5514100	475520	261000	0	24830000	38627000	5	5	5	6.5	6.5	6.5	139.31	0.00029074	3.7861	500050000	5	1	3	2	1	3	2	1	3	2	0	3	2
510	B7ZC46;B1AQY9;B1AQZ0;Q8CHH9;Q8CHH9-2;E0CYM4	B7ZC46;B1AQY9;B1AQZ0;Q8CHH9;Q8CHH9-2	Septin-8	2008-09-01	tr|B7ZC46|B7ZC46_MOUSE Septin-8 OS=Mus musculus GN=Sept8 PE=1 SV=1;tr|B1AQY9|B1AQY9_MOUSE Septin-8 OS=Mus musculus GN=Sept8 PE=1 SV=1;tr|B1AQZ0|B1AQZ0_MOUSE Septin-8 OS=Mus musculus GN=Sept8 PE=1 SV=1;sp|Q8CHH9|SEPT8_MOUSE Septin-8 OS=Mus musculus GN=Sept8	5388600000	4385300000	4315900000	563590000	215540000	175410000	172640000	5093800000	4530600000	5536800000	20	16	16	53.9	44.8	44.8	50.895	0	121.76	14090000000	90	17	19	18	13	15	14	13	15	14	32	26	32
511	Q3TET1;Q3UI47;B1AQZ2;P28741;Q80UK1;Q3TSP1;Q3TTS7;Q8CGJ1;B1AQZ5;F6V6Z9;Q8C901;E9PX57	Q3TET1;Q3UI47;B1AQZ2;P28741	Kinesin-like protein;Kinesin-like protein KIF3A	Kif3a	tr|Q3TET1|Q3TET1_MOUSE Kinesin-like protein KIF3A OS=Mus musculus GN=Kif3a PE=1 SV=1;tr|Q3UI47|Q3UI47_MOUSE Kinesin family member 3A, isoform CRA_b OS=Mus musculus GN=Kif3a PE=1 SV=1;tr|B1AQZ2|B1AQZ2_MOUSE Kinesin-like protein KIF3A OS=Mus musculus GN=Kif3	1127900000	1002500000	641850000	64472000	26231000	23315000	14927000	1102900000	877940000	803490000	16	15	14	25.4	23.8	21.9	79.444	0	48.836	2772300000	34	10	10	12	9	9	11	9	9	10	11	11	12
512	Z4YKM2;B2RWE3;B3DFI8;B1AR13	Z4YKM2;B2RWE3;B3DFI8;B1AR13	CDGSH iron-sulfur domain-containing protein 3, mitochondrial	Cisd3	tr|Z4YKM2|Z4YKM2_MOUSE CDGSH iron-sulfur domain-containing protein 3, mitochondrial OS=Mus musculus GN=Cisd3 PE=1 SV=1;tr|B2RWE3|B2RWE3_MOUSE CDGSH iron sulfur domain 3 OS=Mus musculus GN=Cisd3 PE=1 SV=1;tr|B3DFI8|B3DFI8_MOUSE Cisd3 protein (Fragment) OS=M	271170000	57507000	367130000	63255000	24651000	5227900	33376000	158450000	221520000	341420000	4	4	4	38.3	38.3	38.3	13.155	0	8.6796	695810000	10	4	4	4	4	4	4	4	4	4	4	3	3
513	E9Q614;B1AR17;F7C528;F6V4V3;Q8BR71;Q8K0T3;B0QZH8;O35327;B0QZH7;E0CYH9	E9Q614;B1AR17;F7C528		Chd3	tr|E9Q614|E9Q614_MOUSE Protein Chd3 OS=Mus musculus GN=Chd3 PE=4 SV=1;tr|B1AR17|B1AR17_MOUSE Protein Chd3 OS=Mus musculus GN=Chd3 PE=4 SV=1;tr|F7C528|F7C528_MOUSE Protein Chd3 (Fragment) OS=Mus musculus GN=Chd3 PE=4 SV=1	322690000	123260000	156280000	5846800	3132900	1196700	1517300	252250000	186010000	184220000	25	11	9	15	8.3	6.5	228.97	0	13.61	602220000	20	19	16	19	7	5	6	6	4	4	7	6	7
514	B1ARA3;Q4FZH2;P61255;Q3U7N1;B1ARA5;B2RX86;F7CGP0;A3KGS3-2;A3KGS3	B1ARA3;Q4FZH2;P61255;Q3U7N1;B1ARA5	60S ribosomal protein L26	Rpl26	tr|B1ARA3|B1ARA3_MOUSE 60S ribosomal protein L26 (Fragment) OS=Mus musculus GN=Rpl26 PE=4 SV=1;tr|Q4FZH2|Q4FZH2_MOUSE MCG50660, isoform CRA_a OS=Mus musculus GN=Rpl26 PE=2 SV=1;sp|P61255|RL26_MOUSE 60S ribosomal protein L26 OS=Mus musculus GN=Rpl26 PE=1 SV	14277000000	11703000000	11547000000	4690800000	1784600000	1462800000	1443400000	11207000000	10518000000	12422000000	10	10	10	55.3	55.3	55.3	12.217	0	25.551	37527000000	219	8	10	8	8	10	8	8	10	8	78	73	68
515	B1ARC2;Q8BWY7-3;Q8BWY7;Q8BWY7-2	B1ARC2;Q8BWY7-3;Q8BWY7;Q8BWY7-2	Zinc transporter ZIP11	Slc39a11	tr|B1ARC2|B1ARC2_MOUSE Zinc transporter ZIP11 (Fragment) OS=Mus musculus GN=Slc39a11 PE=4 SV=1;sp|Q8BWY7-3|S39AB_MOUSE Isoform 3 of Zinc transporter ZIP11 OS=Mus musculus GN=Slc39a11;sp|Q8BWY7|S39AB_MOUSE Zinc transporter ZIP11 OS=Mus musculus GN=Slc39a11	0	59199000	46446000	26411000	0	14800000	11611000	0	55950000	52706000	1	1	1	14.5	14.5	14.5	21.025	0	7.3177	105640000	2	0	1	1	0	1	1	0	1	1	0	1	1
516	B1ARD6;Q8CB82;Q7TME9;Q80VG8;Q7TME8;Q8C7F7;Q7TMF0;Q3UBN9;Q7TMF1;B1ARD8;F6RTS1;Q8R3R7	B1ARD6;Q8CB82;Q7TME9;Q80VG8;Q7TME8;Q8C7F7		Slfn9	tr|B1ARD6|B1ARD6_MOUSE Protein Slfn9 OS=Mus musculus GN=Slfn9 PE=4 SV=1;tr|Q8CB82|Q8CB82_MOUSE Putative uncharacterized protein OS=Mus musculus GN=Slfn9 PE=2 SV=1;tr|Q7TME9|Q7TME9_MOUSE Schlafen 9 OS=Mus musculus GN=Slfn9 PE=2 SV=1;tr|Q80VG8|Q80VG8_MOUSE P	3268600000	3350700000	3802100000	179680000	56355000	57771000	65553000	3955900000	3501300000	3825600000	35	35	32	43.3	43.3	40.2	103.99	0	115.04	10421000000	100	25	26	30	25	26	30	23	25	27	31	31	38
517	B1ART1;B1ART2;V9GX23;Q6A066;F6XI52	B1ART1;B1ART2;V9GX23		Vps13d	tr|B1ART1|B1ART1_MOUSE Protein Vps13d OS=Mus musculus GN=Vps13d PE=1 SV=1;tr|B1ART2|B1ART2_MOUSE Protein Vps13d OS=Mus musculus GN=Vps13d PE=1 SV=2;tr|V9GX23|V9GX23_MOUSE Protein Vps13d (Fragment) OS=Mus musculus GN=Vps13d PE=1 SV=1	104860000	76999000	114010000	1142400	404880	297290	440200	0	52505000	167440000	12	12	11	3.6	3.6	3.4	487.32	0	12.024	295870000	8	4	5	5	4	5	5	4	5	4	2	2	4
518	B1ARU4;E9PVY8;E9QA63;Q9QXZ0;Q9QXZ0-2;E9QNP1;Q9QXZ0-4;Q5DTZ2;F6SHS0;Q8C8N4;Q80ZZ3;F6YKN8;Q9CYG3;Q3V3W8;Q8C221	B1ARU4;E9PVY8;E9QA63;Q9QXZ0;Q9QXZ0-2;E9QNP1;Q9QXZ0-4	Microtubule-actin cross-linking factor 1	Macf1	tr|B1ARU4|B1ARU4_MOUSE Microtubule-actin cross-linking factor 1 OS=Mus musculus GN=Macf1 PE=1 SV=1;tr|E9PVY8|E9PVY8_MOUSE Microtubule-actin cross-linking factor 1 OS=Mus musculus GN=Macf1 PE=1 SV=2;tr|E9QA63|E9QA63_MOUSE Microtubule-actin cross-linking fac	10970000000	11867000000	9626000000	68488000	23144000	25036000	20308000	10178000000	11562000000	11202000000	191	190	1	36.1	36	0.2	831.64	0	323.31	32463000000	460	138	139	130	137	139	129	1	1	1	157	161	142
519	B1ARW4;Q99LY9	B1ARW4;Q99LY9	NADH dehydrogenase [ubiquinone] iron-sulfur protein 5;NADH dehydrogenase [ubiquinone] iron-sulfur protein 5, N-terminally processed	Ndufs5	tr|B1ARW4|B1ARW4_MOUSE NADH dehydrogenase [ubiquinone] iron-sulfur protein 5 (Fragment) OS=Mus musculus GN=Ndufs5 PE=4 SV=1;sp|Q99LY9|NDUS5_MOUSE NADH dehydrogenase [ubiquinone] iron-sulfur protein 5 OS=Mus musculus GN=Ndufs5 PE=1 SV=3	0	61328000	39222000	16758000	0	10221000	6537000	0	48401000	49729000	1	1	1	13.2	13.2	13.2	10.909	0.00043228	3.5703	100550000	1	0	1	1	0	1	1	0	1	1	0	1	0
520	B1AS37;Q9D032-2;Q9D032;Q8R051;B1AS34;Q8BYA8;Q8BMY2;Q3U5B9	B1AS37;Q9D032-2;Q9D032;Q8R051;B1AS34;Q8BYA8;Q8BMY2;Q3U5B9	Single-stranded DNA-binding protein 3	Ssbp3	tr|B1AS37|B1AS37_MOUSE Single-stranded DNA-binding protein 3 OS=Mus musculus GN=Ssbp3 PE=1 SV=1;sp|Q9D032-2|SSBP3_MOUSE Isoform 2 of Single-stranded DNA-binding protein 3 OS=Mus musculus GN=Ssbp3;sp|Q9D032|SSBP3_MOUSE Single-stranded DNA-binding protein 3	70420000	82887000	70478000	22378000	7042000	8288700	7047800	92878000	76885000	87746000	2	1	1	7.3	4.6	4.6	38.209	0.00016008	6.2218	223780000	6	2	2	2	1	1	1	1	1	1	2	2	2
521	B1AS67;Q66T02-2;Q66T02	B1AS67;Q66T02-2;Q66T02	Pleckstrin homology domain-containing family G member 5	Plekhg5	tr|B1AS67|B1AS67_MOUSE Pleckstrin homology domain-containing family G member 5 OS=Mus musculus GN=Plekhg5 PE=1 SV=1;sp|Q66T02-2|PKHG5_MOUSE Isoform 2 of Pleckstrin homology domain-containing family G member 5 OS=Mus musculus GN=Plekhg5;sp|Q66T02|PKHG5_MOUS	161140000	158410000	99118000	7345000	2827000	2779100	1738900	129460000	160820000	204950000	7	7	7	8.5	8.5	8.5	117.84	0	15.139	418670000	13	4	4	6	4	4	6	4	4	6	3	4	6
522	B1ASA5;E9QA68	B1ASA5;E9QA68		Zfp362	tr|B1ASA5|B1ASA5_MOUSE Protein Zfp362 OS=Mus musculus GN=Zfp362 PE=2 SV=1;tr|E9QA68|E9QA68_MOUSE Protein Zfp362 (Fragment) OS=Mus musculus GN=Zfp362 PE=4 SV=1	209110000	199640000	81726000	18865000	8042700	7678700	3143300	185980000	182530000	117330000	6	6	5	23.7	23.7	21.3	45.672	0	15.737	490480000	15	5	3	3	5	3	3	4	2	3	6	5	4
523	Q3URA1;B7ZN32;B1ASD1;P17012;P23607;H6U8U5	Q3URA1;B7ZN32;B1ASD1;P17012;P23607	Zinc finger X-chromosomal protein;Zinc finger autosomal protein	Zfx;Zfa	tr|Q3URA1|Q3URA1_MOUSE Putative uncharacterized protein (Fragment) OS=Mus musculus GN=Zfx PE=2 SV=1;tr|B7ZN32|B7ZN32_MOUSE Zfx protein OS=Mus musculus GN=Zfx PE=2 SV=1;tr|B1ASD1|B1ASD1_MOUSE Zinc finger protein X-linked OS=Mus musculus GN=Zfx PE=2 SV=1;sp|	73380000	64377000	80493000	8730000	2935200	2575100	3219700	72162000	56571000	80698000	4	4	4	14.2	14.2	14.2	42.925	0	12.502	218250000	8	3	2	3	3	2	3	3	2	3	3	2	3
524	B1ASK8;Q6P073;B0QZM2;B0QZM1	B1ASK8;Q6P073;B0QZM2;B0QZM1	Ubiquitin-conjugating enzyme E2 J2	Ube2j2	tr|B1ASK8|B1ASK8_MOUSE Ubiquitin-conjugating enzyme E2 J2 OS=Mus musculus GN=Ube2j2 PE=4 SV=1;sp|Q6P073|UB2J2_MOUSE Ubiquitin-conjugating enzyme E2 J2 OS=Mus musculus GN=Ube2j2 PE=1 SV=1;tr|B0QZM2|B0QZM2_MOUSE Ubiquitin-conjugating enzyme E2 J2 (Fragment)	263460000	426720000	197800000	68305000	20266000	32824000	15215000	291640000	299650000	284210000	6	6	6	38.7	38.7	38.7	30.292	0	18.099	887970000	13	3	5	4	3	5	4	3	5	4	1	7	5
525	Q3URU8;B1ASP2;P52332;Q3U8P8;Q8K0I7;Q3UZ30;Q8CFX4;Q3TI10	Q3URU8;B1ASP2;P52332;Q3U8P8;Q8K0I7	Tyrosine-protein kinase;Tyrosine-protein kinase JAK1	Jak1	tr|Q3URU8|Q3URU8_MOUSE Tyrosine-protein kinase OS=Mus musculus GN=Jak1 PE=2 SV=1;tr|B1ASP2|B1ASP2_MOUSE Tyrosine-protein kinase OS=Mus musculus GN=Jak1 PE=3 SV=1;sp|P52332|JAK1_MOUSE Tyrosine-protein kinase JAK1 OS=Mus musculus GN=Jak1 PE=1 SV=1;tr|Q3U8P8|	553240000	477470000	464720000	20770000	7683900	6631500	6454500	587480000	526910000	470100000	19	19	19	21.8	21.8	21.8	133.29	0	47.21	1495400000	31	11	10	12	11	10	12	11	10	12	11	7	13
526	Q9D186;Q3KNM9;B1ASQ2;Q9DCZ4	Q9D186;Q3KNM9;B1ASQ2;Q9DCZ4	Apolipoprotein O	Apoo	tr|Q9D186|Q9D186_MOUSE Apolipoprotein O OS=Mus musculus GN=Apoo PE=2 SV=1;tr|Q3KNM9|Q3KNM9_MOUSE Apoo protein OS=Mus musculus GN=Apoo PE=2 SV=1;tr|B1ASQ2|B1ASQ2_MOUSE Apolipoprotein O OS=Mus musculus GN=Apoo PE=4 SV=1;sp|Q9DCZ4|APOO_MOUSE Apolipoprotein O	1799000000	1359800000	927130000	408590000	179900000	135980000	92713000	1531200000	1296700000	1211400000	6	6	6	47.6	47.6	47.6	18.798	0	25.982	4085900000	28	6	5	5	6	5	5	6	5	5	12	7	9
527	B1AST8;B1AST7;E9QLW6;E9Q1Q1;Q60592;Q3URY8;E9Q6Q5;Q9R1L5;B1AST5;Q8BGU6;Q9DBV8	B1AST8;B1AST7;E9QLW6;E9Q1Q1;Q60592	Microtubule-associated serine/threonine-protein kinase 2	Mast2	tr|B1AST8|B1AST8_MOUSE Microtubule associated serine/threonine kinase 2, isoform CRA_b OS=Mus musculus GN=Mast2 PE=1 SV=1;tr|B1AST7|B1AST7_MOUSE Microtubule-associated serine/threonine-protein kinase 2 OS=Mus musculus GN=Mast2 PE=1 SV=1;tr|E9QLW6|E9QLW6_MO	53922000	66967000	53735000	1781900	550230	683340	548320	67211000	57566000	85257000	9	5	5	6.7	4.4	4.4	190.36	0.00015903	6.0243	174620000	8	6	7	4	2	4	2	2	4	2	2	4	2
528	B1ASU9;O55047;O55047-2;O55047-3;P70320;B7ZC85;Q6NZC4;F6XSD0;Q3TTG3;B7ZC84;D6RHM1	B1ASU9;O55047;O55047-2;O55047-3;P70320;B7ZC85;Q6NZC4	Serine/threonine-protein kinase tousled-like 2	Tlk2	tr|B1ASU9|B1ASU9_MOUSE Serine/threonine-protein kinase tousled-like 2 OS=Mus musculus GN=Tlk2 PE=4 SV=1;sp|O55047|TLK2_MOUSE Serine/threonine-protein kinase tousled-like 2 OS=Mus musculus GN=Tlk2 PE=1 SV=2;sp|O55047-2|TLK2_MOUSE Isoform 2 of Serine/threoni	134590000	436400000	252720000	18721000	3058900	9918200	5743700	213290000	436000000	276650000	9	9	8	20.4	20.4	17.7	85.341	0	22.582	823720000	15	3	7	5	3	7	5	2	6	4	4	6	5
529	B1ASY9;Q571K4	B1ASY9;Q571K4	TGF-beta-activated kinase 1 and MAP3K7-binding protein 3	Tab3	tr|B1ASY9|B1ASY9_MOUSE Mitogen-activated protein kinase kinase kinase 7 interacting protein 3 OS=Mus musculus GN=Tab3 PE=2 SV=1;sp|Q571K4|TAB3_MOUSE TGF-beta-activated kinase 1 and MAP3K7-binding protein 3 OS=Mus musculus GN=Tab3 PE=1 SV=2	54182000	28856000	35302000	3586100	1641900	874440	1069800	39930000	40163000	39795000	4	3	3	8.5	7.4	7.4	79.029	0.00015674	5.6175	118340000	4	4	1	2	3	1	1	3	1	1	2	1	1
530	B1AT03;Q80ZH7;K4DI59;P97386-2;P97386;Q3TJN5;Q3U0I5;G3UYI8	B1AT03;Q80ZH7;K4DI59;P97386-2;P97386;Q3TJN5	DNA ligase;DNA ligase 3	Lig3	tr|B1AT03|B1AT03_MOUSE DNA ligase OS=Mus musculus GN=Lig3 PE=1 SV=1;tr|Q80ZH7|Q80ZH7_MOUSE DNA ligase OS=Mus musculus GN=Lig3 PE=1 SV=1;tr|K4DI59|K4DI59_MOUSE DNA ligase OS=Mus musculus GN=Lig3 PE=1 SV=1;sp|P97386-2|DNLI3_MOUSE Isoform Beta of DNA ligase 3	1539200000	960240000	959120000	55782000	24825000	15488000	15470000	1190100000	1314800000	1088200000	22	22	1	36.7	36.7	3	106.14	0	47.491	3458500000	52	16	13	16	16	13	16	1	0	1	18	14	20
531	B1AT82;Q9D0M1;Q8BK29;B1AT84;B1AT83	B1AT82;Q9D0M1;Q8BK29;B1AT84	Phosphoribosyl pyrophosphate synthase-associated protein 1	Prpsap1	tr|B1AT82|B1AT82_MOUSE MCG6846, isoform CRA_c OS=Mus musculus GN=Prpsap1 PE=1 SV=1;sp|Q9D0M1|KPRA_MOUSE Phosphoribosyl pyrophosphate synthase-associated protein 1 OS=Mus musculus GN=Prpsap1 PE=1 SV=1;tr|Q8BK29|Q8BK29_MOUSE Putative uncharacterized protein	2073600000	2084100000	2326400000	249390000	79754000	80156000	89475000	2330100000	2134300000	2330600000	14	13	13	52.2	48.6	48.6	42.467	0	91.515	6484000000	44	12	12	9	11	11	8	11	11	8	15	16	13
532	Q66I45;B1ATD5;R4GML8;Q8K296;B1ATD4;M0QW74;Q8K296-2;Q8R0N4;Q80U24;Q9CVQ1;Q6PE02	Q66I45;B1ATD5;R4GML8;Q8K296;B1ATD4;M0QW74;Q8K296-2	Myotubularin-related protein 3	Mtmr3	tr|Q66I45|Q66I45_MOUSE Mtmr3 protein OS=Mus musculus GN=Mtmr3 PE=2 SV=1;tr|B1ATD5|B1ATD5_MOUSE MCG9626, isoform CRA_b OS=Mus musculus GN=Mtmr3 PE=1 SV=1;tr|R4GML8|R4GML8_MOUSE Myotubularin-related protein 3 (Fragment) OS=Mus musculus GN=Mtmr3 PE=1 SV=1;sp|	308140000	689580000	559140000	22241000	4402000	9851100	7987800	501930000	558990000	687870000	16	16	14	21	21	19.6	129.61	0	48.845	1556900000	37	9	12	9	9	12	9	8	10	8	12	13	12
533	Q8C3C9;B1AV77;B1ATI0;P47740;Q3U7B5;Q99PH3;Q8BQ93;Q99PH4;Q8C5J1;REV__Q9DAH1;REV__Q7TT52-2;REV__F6VUT6	Q8C3C9;B1AV77;B1ATI0;P47740;Q3U7B5;Q99PH3;Q8BQ93;Q99PH4;Q8C5J1	Aldehyde dehydrogenase;Fatty aldehyde dehydrogenase	Aldh3a2	tr|Q8C3C9|Q8C3C9_MOUSE Aldehyde dehydrogenase OS=Mus musculus GN=Aldh3a2 PE=2 SV=1;tr|B1AV77|B1AV77_MOUSE Aldehyde dehydrogenase OS=Mus musculus GN=Aldh3a2 PE=3 SV=1;tr|B1ATI0|B1ATI0_MOUSE Aldehyde dehydrogenase OS=Mus musculus GN=Aldh3a2 PE=3 SV=1;sp|P477	2936600000	3008200000	2288400000	374240000	133480000	136740000	104020000	2779700000	3245100000	2541700000	15	14	14	48.3	45.9	45.9	53.998	0	59.057	8233200000	61	15	14	11	14	13	10	14	13	10	20	24	17
534	B1ATR5;Q9QZF1;Q3TX35;Q3TWB2;Q8CFZ4	B1ATR5;Q9QZF1;Q3TX35;Q3TWB2;Q8CFZ4	Glypican-3;Secreted glypican-3	Gpc3	tr|B1ATR5|B1ATR5_MOUSE Glypican-3 OS=Mus musculus GN=Gpc3 PE=3 SV=1;tr|Q9QZF1|Q9QZF1_MOUSE Glypican-3 OS=Mus musculus GN=Gpc3 PE=2 SV=1;tr|Q3TX35|Q3TX35_MOUSE Putative uncharacterized protein OS=Mus musculus GN=Gpc3 PE=2 SV=1;tr|Q3TWB2|Q3TWB2_MOUSE Glypica	0	0	0	0	0	0	0	0	0	0	1	1	1	1.9	1.9	1.9	48.89	1	-2	0	0	0	0	1	0	0	1	0	0	1	0	0	0
535	B1ATV0;Q8CI67;Q3UL16;Q9WVD4;Q8C6W8;B1ATV1	B1ATV0;Q8CI67;Q3UL16;Q9WVD4;Q8C6W8	Chloride channel protein;H(+)/Cl(-) exchange transporter 5	Clcn5	tr|B1ATV0|B1ATV0_MOUSE H(+)/Cl(-) exchange transporter 5 OS=Mus musculus GN=Clcn5 PE=4 SV=1;tr|Q8CI67|Q8CI67_MOUSE Chloride channel 5 OS=Mus musculus GN=Clcn5 PE=2 SV=1;tr|Q3UL16|Q3UL16_MOUSE Putative uncharacterized protein OS=Mus musculus GN=Clcn5 PE=2 S	379620000	417120000	291450000	31091000	10846000	11918000	8327300	381320000	409270000	385590000	12	12	9	22.4	22.4	19.4	90.705	0	24.444	1088200000	24	8	10	6	8	10	6	5	7	3	8	10	6
536	B1ATZ0;B1ATZ1;Q3TLL4;Q3UMA3;Q99LI8;B1ATY9;F6VV02	B1ATZ0;B1ATZ1;Q3TLL4;Q3UMA3;Q99LI8;B1ATY9	Hepatocyte growth factor-regulated tyrosine kinase substrate	Hgs	tr|B1ATZ0|B1ATZ0_MOUSE Hepatocyte growth factor-regulated tyrosine kinase substrate OS=Mus musculus GN=Hgs PE=1 SV=1;tr|B1ATZ1|B1ATZ1_MOUSE Hepatocyte growth factor-regulated tyrosine kinase substrate OS=Mus musculus GN=Hgs PE=1 SV=1;tr|Q3TLL4|Q3TLL4_MOUSE	3751800000	3745700000	3416900000	266200000	91506000	91358000	83339000	3473700000	3544300000	3964300000	22	22	22	32.2	32.2	32.2	85.778	0	88.681	10914000000	81	19	20	16	19	20	16	19	20	16	30	27	24
537	B1AU25;Q9Z0X1;Q1L6K5;Q2QKE3	B1AU25;Q9Z0X1	Apoptosis-inducing factor 1, mitochondrial	Aifm1	tr|B1AU25|B1AU25_MOUSE Apoptosis-inducing factor 1, mitochondrial OS=Mus musculus GN=Aifm1 PE=1 SV=1;sp|Q9Z0X1|AIFM1_MOUSE Apoptosis-inducing factor 1, mitochondrial OS=Mus musculus GN=Aifm1 PE=1 SV=1	11429000000	10008000000	12362000000	1024200000	346320000	303270000	374600000	12295000000	11001000000	10300000000	27	27	27	58.9	58.9	58.9	66.113	0	203.18	33799000000	136	22	23	23	22	23	23	22	23	23	50	42	44
538	B1AU74;Q9CWP6;Q9CWP6-2;Q9CWP6-3;Q3U0U1;Q9CWP6-4	B1AU74;Q9CWP6;Q9CWP6-2;Q9CWP6-3	Motile sperm domain-containing protein 2	Mospd2	tr|B1AU74|B1AU74_MOUSE Motile sperm domain-containing protein 2 OS=Mus musculus GN=Mospd2 PE=4 SV=1;sp|Q9CWP6|MSPD2_MOUSE Motile sperm domain-containing protein 2 OS=Mus musculus GN=Mospd2 PE=1 SV=2;sp|Q9CWP6-2|MSPD2_MOUSE Isoform 2 of Motile sperm domain-	1078600000	951690000	763100000	87293000	33706000	29740000	23847000	1046300000	905800000	917650000	13	13	13	30.3	30.3	30.3	59.81	0	33.682	2793400000	31	10	10	8	10	10	8	10	10	8	11	10	10
539	B1AU75;Q99MD9;B1AU76;Q99MD9-2;Q3TTH5	B1AU75;Q99MD9;B1AU76;Q99MD9-2	Nuclear autoantigenic sperm protein	Nasp	tr|B1AU75|B1AU75_MOUSE Nuclear autoantigenic sperm protein OS=Mus musculus GN=Nasp PE=1 SV=1;sp|Q99MD9|NASP_MOUSE Nuclear autoantigenic sperm protein OS=Mus musculus GN=Nasp PE=1 SV=2;tr|B1AU76|B1AU76_MOUSE Nuclear autoantigenic sperm protein OS=Mus muscul	8222300000	10411000000	8596500000	633260000	191220000	242130000	199920000	8334400000	9244600000	9134900000	38	38	38	66.8	66.8	66.8	84.012	0	323.31	27230000000	179	33	34	32	33	34	32	33	34	32	62	63	54
540	B1AUE5	B1AUE5	Peroxisome biogenesis factor 10	Pex10	sp|B1AUE5|PEX10_MOUSE Peroxisome biogenesis factor 10 OS=Mus musculus GN=Pex10 PE=2 SV=1	178500000	56158000	40685000	16196000	10500000	3303400	2393300	106860000	91453000	83096000	3	3	3	11.1	11.1	11.1	37.157	0.00015423	5.1827	275340000	5	3	2	1	3	2	1	3	2	1	2	2	1
541	B1AUN2;B1AUN3;Q3UKV0;A4FUS0;A0AUM9;Q3T9T4	B1AUN2;B1AUN3;Q3UKV0;A4FUS0;A0AUM9		Eif2b3	tr|B1AUN2|B1AUN2_MOUSE MCG14442 OS=Mus musculus GN=Eif2b3 PE=4 SV=1;tr|B1AUN3|B1AUN3_MOUSE Protein Eif2b3 OS=Mus musculus GN=Eif2b3 PE=4 SV=1;tr|Q3UKV0|Q3UKV0_MOUSE Protein Eif2b3 OS=Mus musculus GN=Eif2b3 PE=2 SV=1;tr|A4FUS0|A4FUS0_MOUSE Eif2b3 protein OS	1095200000	1420900000	643220000	108940000	37765000	48997000	22180000	989360000	1023100000	1263300000	20	20	20	54.9	54.9	54.9	50.488	0	61.035	3159300000	48	15	15	12	15	15	12	15	15	12	19	16	13
542	G3UXR9;G8JL47;B1AUR6;B1AUR6-2;G3UYM2	G3UXR9;G8JL47;B1AUR6;B1AUR6-2	Protein MMS22-like	Mms22l	tr|G3UXR9|G3UXR9_MOUSE Protein MMS22-like (Fragment) OS=Mus musculus GN=Mms22l PE=4 SV=1;tr|G8JL47|G8JL47_MOUSE Protein MMS22-like OS=Mus musculus GN=Mms22l PE=4 SV=1;sp|B1AUR6|MMS22_MOUSE Protein MMS22-like OS=Mus musculus GN=Mms22l PE=2 SV=1;sp|B1AUR6-2|	159270000	141440000	13498000	7481200	3792200	3367600	321380	79685000	112140000	127350000	3	3	3	5	5	5	83.803	0.00015225	4.8613	314210000	6	2	3	1	2	3	1	2	3	1	3	2	1
543	F6TQF4;F6THK7;B1AUW8;B1AUW9;Q540G0;Q8BR10;Q99J34;B1AUW6;Q62406;Q62406-2;Q8K4N6;Q8K4N7;F7CUT1;Q8K4N8	F6TQF4;F6THK7;B1AUW8;B1AUW9;Q540G0;Q8BR10;Q99J34;B1AUW6;Q62406;Q62406-2;Q8K4N6;Q8K4N7;F7CUT1;Q8K4N8	Interleukin-1 receptor-associated kinase 1	Irak1;IRAK1b;IRAK1a	tr|F6TQF4|F6TQF4_MOUSE Interleukin-1 receptor-associated kinase 1 (Fragment) OS=Mus musculus GN=Irak1 PE=4 SV=1;tr|F6THK7|F6THK7_MOUSE Interleukin-1 receptor-associated kinase 1 (Fragment) OS=Mus musculus GN=Irak1 PE=4 SV=1;tr|B1AUW8|B1AUW8_MOUSE Interleuk	18961000	23281000	19764000	6889600	2106700	2586800	2196000	18710000	22831000	19727000	2	2	2	8.9	8.9	8.9	27.423	1	-2	62006000	3	1	2	2	1	2	2	1	2	2	1	1	1
544	B1AUY7;Q540H0;Q9QY36;B1AUY8;Q684Q8	B1AUY7;Q540H0;Q9QY36;B1AUY8;Q684Q8	N-alpha-acetyltransferase 10	Naa10	tr|B1AUY7|B1AUY7_MOUSE N-alpha-acetyltransferase 10 OS=Mus musculus GN=Naa10 PE=4 SV=1;tr|Q540H0|Q540H0_MOUSE N-acetyltransferase ARD1 homolog (S. cerevisiae), isoform CRA_e OS=Mus musculus GN=Naa10 PE=2 SV=1;sp|Q9QY36|NAA10_MOUSE N-alpha-acetyltransferase	2375300000	1382700000	1664500000	338910000	148460000	86418000	104030000	1767000000	2214200000	1771600000	13	13	5	67.8	67.8	15.5	26.318	0	45.937	5422500000	48	10	11	10	10	11	10	3	4	3	18	15	15
545	B1AV39;Q6IE82	B1AV39;Q6IE82	Protein Jade-3	Jade3	tr|B1AV39|B1AV39_MOUSE Protein Jade-3 OS=Mus musculus GN=Jade3 PE=1 SV=1;sp|Q6IE82|JADE3_MOUSE Protein Jade-3 OS=Mus musculus GN=Jade3 PE=1 SV=1	185990000	236500000	157270000	12335000	3957200	5031800	3346100	190610000	208730000	200180000	7	7	6	14	14	12.3	93.585	0	12.069	579750000	13	4	5	4	4	5	4	3	4	4	3	6	4
546	B1AV66;Q8BR70	B1AV66;Q8BR70	Protein YIPF;Protein YIPF6	Yipf6	tr|B1AV66|B1AV66_MOUSE Protein YIPF6 (Fragment) OS=Mus musculus GN=Yipf6 PE=4 SV=1;sp|Q8BR70|YIPF6_MOUSE Protein YIPF6 OS=Mus musculus GN=Yipf6 PE=2 SV=1	0	166960000	112280000	25386000	0	15179000	10208000	0	160180000	120730000	1	1	1	7.1	7.1	7.1	21.781	0	11.412	279250000	3	1	1	1	1	1	1	1	1	1	1	1	1
547	B1AV75;Q3UJP5;Q9D005	B1AV75;Q3UJP5	Protein C8orf37 homolog	2610301B20Rik	tr|B1AV75|B1AV75_MOUSE Protein 2610301B20Rik OS=Mus musculus GN=2610301B20Rik PE=4 SV=1;sp|Q3UJP5|CH037_MOUSE Protein C8orf37 homolog OS=Mus musculus PE=1 SV=1	71198000	0	43823000	7668100	4746500	0	2921600	72172000	0	47522000	3	3	3	23.8	23.8	23.8	23.935	0	7.5319	115020000	5	3	1	2	3	1	2	3	1	2	2	1	2
548	B1AVH5;Q3U4G8;B1AVH4;Q8C0P5;Q8BLN0;Q8R0L6;Q3U8R5;Q6NVB7	B1AVH5;Q3U4G8;B1AVH4;Q8C0P5;Q8BLN0	Coronin;Coronin-2A	Coro2a	tr|B1AVH5|B1AVH5_MOUSE Coronin OS=Mus musculus GN=Coro2a PE=3 SV=1;tr|Q3U4G8|Q3U4G8_MOUSE Coronin OS=Mus musculus GN=Coro2a PE=2 SV=1;tr|B1AVH4|B1AVH4_MOUSE Coronin OS=Mus musculus GN=Coro2a PE=2 SV=1;sp|Q8C0P5|COR2A_MOUSE Coronin-2A OS=Mus musculus GN=Cor	129350000	119280000	77440000	9057300	3593000	3313300	2151100	94843000	121260000	118910000	8	8	7	14.4	14.4	13.1	61.708	0	14.61	326060000	16	6	5	5	6	5	5	5	4	5	6	4	6
549	B1AVP5;Q8BHE1	B1AVP5;Q8BHE1	Gem-associated protein 8	Gemin8	tr|B1AVP5|B1AVP5_MOUSE Gem-associated protein 8 OS=Mus musculus GN=Gemin8 PE=4 SV=1;sp|Q8BHE1|GEMI8_MOUSE Gem-associated protein 8 OS=Mus musculus GN=Gemin8 PE=1 SV=1	52617000	87000000	61769000	18308000	4783400	7909100	5615400	52609000	76287000	57383000	3	3	3	10.1	10.1	10.1	24.492	0.00097861	2.9596	201390000	6	2	3	2	2	3	2	2	3	2	2	3	1
550	B1AVU1;Q922R0;Q3UDT1;Q9D2E1	B1AVU1;Q922R0;Q3UDT1	cAMP-dependent protein kinase catalytic subunit PRKX	Prkx	tr|B1AVU1|B1AVU1_MOUSE cAMP-dependent protein kinase catalytic subunit PRKX OS=Mus musculus GN=Prkx PE=1 SV=1;sp|Q922R0|PRKX_MOUSE cAMP-dependent protein kinase catalytic subunit PRKX OS=Mus musculus GN=Prkx PE=1 SV=1;tr|Q3UDT1|Q3UDT1_MOUSE Putative unchar	20088000	8054300	0	1876100	1339200	536950	0	14722000	10734000	0	3	2	2	8.4	8.4	8.4	26.679	0.00043035	3.4794	28142000	3	3	2	0	2	1	0	2	1	0	2	1	0
551	E7FLY0;B1AVY7	E7FLY0;B1AVY7	Kinesin-like protein;Kinesin-like protein KIF16B	Kif16b	tr|E7FLY0|E7FLY0_MOUSE Kinesin superfamily protein 16B OS=Mus musculus GN=Kif16b PE=2 SV=1;sp|B1AVY7|KI16B_MOUSE Kinesin-like protein KIF16B OS=Mus musculus GN=Kif16b PE=1 SV=1	64220000	25336000	68575000	1928400	783170	308980	836290	0	35759000	65183000	8	7	7	9.4	8.8	8.8	151.29	0	6.9803	158130000	6	5	2	4	4	1	3	4	1	3	2	1	3
552	B1AVZ0	B1AVZ0	Uracil phosphoribosyltransferase homolog	Uprt	sp|B1AVZ0|UPP_MOUSE Uracil phosphoribosyltransferase homolog OS=Mus musculus GN=Uprt PE=2 SV=1	1399500000	1209700000	767840000	187610000	77748000	67204000	42658000	1445900000	1158600000	1014100000	10	10	10	47.4	47.4	47.4	34.278	0	45.543	3377000000	28	8	7	6	8	7	6	8	7	6	12	8	8
553	B1AW21;Q9Z2C5;Q3TLK7;Q9D4L1;Q8CD00;Q3UDN6;Q8CCE6	B1AW21;Q9Z2C5;Q3TLK7;Q9D4L1;Q8CD00	Myotubularin	Mtm1	tr|B1AW21|B1AW21_MOUSE Myotubularin OS=Mus musculus GN=Mtm1 PE=4 SV=1;sp|Q9Z2C5|MTM1_MOUSE Myotubularin OS=Mus musculus GN=Mtm1 PE=1 SV=2;tr|Q3TLK7|Q3TLK7_MOUSE Putative uncharacterized protein OS=Mus musculus GN=Mtm1 PE=2 SV=1;tr|Q9D4L1|Q9D4L1_MOUSE Putat	144610000	149220000	84185000	9692700	3708000	3826100	2158600	135450000	136470000	111160000	8	7	4	18.2	16.6	8.6	65.962	0	7.7896	378010000	7	3	6	3	3	5	3	1	3	1	2	3	2
554	B1AW58;Q8BW96;Q3TDM2;Q3UH04;Q8BW96-2;Q8BW96-3	B1AW58;Q8BW96;Q3TDM2;Q3UH04;Q8BW96-2;Q8BW96-3	Calcium/calmodulin-dependent protein kinase type 1D	Camk1d	tr|B1AW58|B1AW58_MOUSE Calcium/calmodulin-dependent protein kinase ID OS=Mus musculus GN=Camk1d PE=2 SV=1;sp|Q8BW96|KCC1D_MOUSE Calcium/calmodulin-dependent protein kinase type 1D OS=Mus musculus GN=Camk1d PE=1 SV=2;tr|Q3TDM2|Q3TDM2_MOUSE Putative uncharac	134130000	238270000	258780000	30056000	6387000	11346000	12323000	212920000	281420000	193290000	10	6	6	39.7	28.1	28.1	42.918	0	20.807	631180000	11	7	6	9	3	3	5	3	3	5	3	2	6
555	B1AWB9;O88207;A3KGE7	B1AWB9;O88207	Collagen alpha-1(V) chain	Col5a1	tr|B1AWB9|B1AWB9_MOUSE Collagen, type V, alpha 1 OS=Mus musculus GN=Col5a1 PE=2 SV=1;sp|O88207|CO5A1_MOUSE Collagen alpha-1(V) chain OS=Mus musculus GN=Col5a1 PE=2 SV=2	0	59787000	84927000	1491900	0	616360	875540	0	80770000	81479000	6	6	6	7	7	7	183.67	0	20.031	144710000	8	0	4	5	0	4	5	0	4	5	0	3	5
556	B1AWE0;Q6PFA2;B1AWE1;B1AWD8;B1AWD9;O08585;Q3THU7	B1AWE0;Q6PFA2;B1AWE1;B1AWD8;B1AWD9;O08585;Q3THU7	Clathrin light chain A	Clta	tr|B1AWE0|B1AWE0_MOUSE Clathrin light chain A OS=Mus musculus GN=Clta PE=1 SV=1;tr|Q6PFA2|Q6PFA2_MOUSE Clathrin light chain A OS=Mus musculus GN=Clta PE=1 SV=1;tr|B1AWE1|B1AWE1_MOUSE Clathrin light chain A OS=Mus musculus GN=Clta PE=1 SV=1;tr|B1AWD8|B1AWD8	5686500000	3398600000	4527800000	1361300000	568650000	339860000	452780000	4530800000	3861100000	5212600000	8	8	8	31	31	31	23.478	0	43.717	13613000000	20	7	6	6	7	6	6	7	6	6	9	5	6
557	B1AWG1;Q8BKE9;Q8CGJ7;Q05DN8	B1AWG1;Q8BKE9;Q8CGJ7;Q05DN8	Intraflagellar transport protein 74 homolog	Ift74	tr|B1AWG1|B1AWG1_MOUSE Intraflagellar transport protein 74 homolog OS=Mus musculus GN=Ift74 PE=1 SV=1;sp|Q8BKE9|IFT74_MOUSE Intraflagellar transport protein 74 homolog OS=Mus musculus GN=Ift74 PE=1 SV=2;tr|Q8CGJ7|Q8CGJ7_MOUSE Ift74 protein (Fragment) OS=Mu	6351900	95148000	71579000	6410300	235260	3524000	2651100	35557000	93231000	53668000	3	3	3	10.1	10.1	10.1	43.937	0	8.7099	173080000	6	1	2	2	1	2	2	1	2	2	1	3	2
558	B1AWH1;Q3U269	B1AWH1;Q3U269	Thiosulfate sulfurtransferase/rhodanese-like domain-containing protein 2	Tstd2	tr|B1AWH1|B1AWH1_MOUSE Thiosulfate sulfurtransferase/rhodanese-like domain-containing protein 2 (Fragment) OS=Mus musculus GN=Tstd2 PE=4 SV=1;sp|Q3U269|TSTD2_MOUSE Thiosulfate sulfurtransferase/rhodanese-like domain-containing protein 2 OS=Mus musculus GN=	21433000	11042000	22995000	6163200	2381400	1226800	2555000	25894000	13066000	28806000	1	1	1	14.7	14.7	14.7	14.346	0.0022995	2.3668	55469000	3	1	1	1	1	1	1	1	1	1	1	1	1
559	E9Q193;E0CY20;B1AX39	E9Q193;E0CY20;B1AX39	Zinc finger CCHC domain-containing protein 7	Zcchc7	tr|E9Q193|E9Q193_MOUSE Zinc finger CCHC domain-containing protein 7 (Fragment) OS=Mus musculus GN=Zcchc7 PE=4 SV=1;tr|E0CY20|E0CY20_MOUSE Zinc finger CCHC domain-containing protein 7 OS=Mus musculus GN=Zcchc7 PE=4 SV=1;sp|B1AX39|ZCHC7_MOUSE Zinc finger CCH	11594000	17188000	11173000	7991100	2318900	3437700	2234500	11594000	16490000	12014000	1	1	1	12.7	12.7	12.7	13.484	0.00056883	3.339	39956000	3	1	1	1	1	1	1	1	1	1	1	1	1
560	B1AX98;Q505F5;E9PV22;F6YT33;F6Z4L9	B1AX98;Q505F5;E9PV22	Leucine-rich repeat-containing protein 47	Lrrc47	tr|B1AX98|B1AX98_MOUSE Leucine rich repeat containing 47 OS=Mus musculus GN=Lrrc47 PE=2 SV=1;sp|Q505F5|LRC47_MOUSE Leucine-rich repeat-containing protein 47 OS=Mus musculus GN=Lrrc47 PE=2 SV=1;tr|E9PV22|E9PV22_MOUSE Leucine-rich repeat-containing protein 4	4926800000	5231000000	6177100000	429860000	129650000	137660000	162560000	5251900000	5707200000	6007400000	25	25	25	62.1	62.1	62.1	63.589	0	119.17	16335000000	114	20	25	22	20	25	22	20	25	22	39	37	38
561	Q3V085;B1AXB9	Q3V085;B1AXB9		Gm4907	tr|Q3V085|Q3V085_MOUSE Putative uncharacterized protein OS=Mus musculus GN=Gm4907 PE=2 SV=1;tr|B1AXB9|B1AXB9_MOUSE Predicted gene, EG236749 OS=Mus musculus GN=Gm4907 PE=2 SV=1	0	0	0	0	0	0	0	0	0	0	3	1	1	7.5	2.9	2.9	46.755	1	-2	0	0	3	2	2	1	0	0	1	0	0	0	0	0
562	B1AXD8	B1AXD8	Akirin-2	Akirin2	sp|B1AXD8|AKIR2_MOUSE Akirin-2 OS=Mus musculus GN=Akirin2 PE=1 SV=1	1807700000	1310400000	40383000	315850000	180770000	131040000	4038300	976730000	1004800000	896920000	3	3	3	28.4	28.4	28.4	22.113	0.00056697	3.2711	3158500000	5	1	2	2	1	2	2	1	2	2	1	2	2
563	B1AXI9;J3QMP9;Q62036	B1AXI9;J3QMP9;Q62036	Centrosomal protein of 131 kDa	Cep131	tr|B1AXI9|B1AXI9_MOUSE 5-azacytidine induced gene 1 OS=Mus musculus GN=Cep131 PE=1 SV=1;tr|J3QMP9|J3QMP9_MOUSE Centrosomal protein of 131 kDa OS=Mus musculus GN=Cep131 PE=1 SV=1;sp|Q62036|CP131_MOUSE Centrosomal protein of 131 kDa OS=Mus musculus GN=Cep131	521030000	671660000	601690000	24922000	7236600	9328600	8356800	676870000	654700000	653910000	22	22	22	27.9	27.9	27.9	120.23	0	58.004	1794400000	44	10	14	13	10	14	13	10	14	13	13	15	16
564	B1AXJ3;B1AXJ4;Q924X6-2;Q924X6;B1AXJ6;F6YZZ8;B1AXJ5	B1AXJ3;B1AXJ4;Q924X6-2;Q924X6;B1AXJ6;F6YZZ8;B1AXJ5	Low-density lipoprotein receptor-related protein 8	Lrp8	tr|B1AXJ3|B1AXJ3_MOUSE Low-density lipoprotein receptor-related protein 8 OS=Mus musculus GN=Lrp8 PE=4 SV=1;tr|B1AXJ4|B1AXJ4_MOUSE Low-density lipoprotein receptor-related protein 8 OS=Mus musculus GN=Lrp8 PE=4 SV=1;sp|Q924X6-2|LRP8_MOUSE Isoform 2 of Low-	9456000	593040000	20122000	12208000	185410	11628000	394540	0	421670000	176880000	5	5	5	8.4	8.4	8.4	96.318	0.0015093	2.6025	622610000	5	1	4	1	1	4	1	1	4	1	1	3	1
565	B1AXP6-2;B1AXP6;B1AXP6-3;B1AXP6-4	B1AXP6-2;B1AXP6;B1AXP6-3;B1AXP6-4	Mitochondrial import receptor subunit TOM5 homolog	Tomm5	sp|B1AXP6-2|TOM5_MOUSE Isoform 2 of Mitochondrial import receptor subunit TOM5 homolog OS=Mus musculus GN=Tomm5;sp|B1AXP6|TOM5_MOUSE Mitochondrial import receptor subunit TOM5 homolog OS=Mus musculus GN=Tomm5 PE=3 SV=1;sp|B1AXP6-3|TOM5_MOUSE Isoform 3 of M	879000000	583860000	1136900000	649940000	219750000	145960000	284220000	691270000	684450000	1143000000	3	3	3	39.5	39.5	39.5	5.1161	0.0001499	4.4786	2599700000	10	3	1	3	3	1	3	3	1	3	4	2	4
566	B1AXS6;B1AXS8;B1AXS7;B1AXS5;Q9JLM4;B0R077;Q8CG95;Q32P02	B1AXS6;B1AXS8;B1AXS7;B1AXS5;Q9JLM4;B0R077;Q8CG95	Zinc finger MYM-type protein 3	Zmym3	tr|B1AXS6|B1AXS6_MOUSE Zinc finger MYM-type protein 3 OS=Mus musculus GN=Zmym3 PE=4 SV=1;tr|B1AXS8|B1AXS8_MOUSE Zinc finger MYM-type protein 3 OS=Mus musculus GN=Zmym3 PE=4 SV=1;tr|B1AXS7|B1AXS7_MOUSE Zinc finger MYM-type protein 3 OS=Mus musculus GN=Zmym3	68364000	86603000	51760000	3085500	1020400	1292600	772540	83966000	63323000	86715000	4	4	4	4.9	4.9	4.9	142.06	0.00015918	6.0783	206730000	6	3	3	1	3	3	1	3	3	1	3	2	1
567	B1AY10;B1AY10-2;B1AY10-3	B1AY10;B1AY10-2;B1AY10-3	Transcriptional repressor NF-X1	Nfx1	sp|B1AY10|NFX1_MOUSE Transcriptional repressor NF-X1 OS=Mus musculus GN=Nfx1 PE=2 SV=1;sp|B1AY10-2|NFX1_MOUSE Isoform 2 of Transcriptional repressor NF-X1 OS=Mus musculus GN=Nfx1;sp|B1AY10-3|NFX1_MOUSE Isoform 3 of Transcriptional repressor NF-X1 OS=Mus mu	371370000	452900000	307780000	16648000	5461300	6660200	4526200	399460000	455140000	357290000	14	14	14	20.9	20.9	20.9	123.81	0	39.193	1132000000	28	9	11	8	9	11	8	9	11	8	9	12	7
568	E9PV45;B1AY13;B1AY13-2	E9PV45;B1AY13	Ubiquitin carboxyl-terminal hydrolase;Ubiquitin carboxyl-terminal hydrolase 24	Usp24	tr|E9PV45|E9PV45_MOUSE Ubiquitin carboxyl-terminal hydrolase OS=Mus musculus GN=Usp24 PE=1 SV=1;sp|B1AY13|UBP24_MOUSE Ubiquitin carboxyl-terminal hydrolase 24 OS=Mus musculus GN=Usp24 PE=1 SV=1	2138300000	2654100000	2340700000	47554000	14255000	17694000	15604000	2459600000	2565900000	2611900000	52	52	52	28.5	28.5	28.5	294.13	0	200.59	7133000000	131	32	46	36	32	46	36	32	46	36	39	51	41
569	Q9D2L4;B1AYG7;B1AYG6;Q9Z0T9	Q9D2L4;B1AYG7;B1AYG6;Q9Z0T9	Integrin beta;Integrin beta-6	Itgb6	tr|Q9D2L4|Q9D2L4_MOUSE Integrin beta OS=Mus musculus GN=Itgb6 PE=2 SV=1;tr|B1AYG7|B1AYG7_MOUSE Integrin beta (Fragment) OS=Mus musculus GN=Itgb6 PE=3 SV=1;tr|B1AYG6|B1AYG6_MOUSE Integrin beta OS=Mus musculus GN=Itgb6 PE=3 SV=1;sp|Q9Z0T9|ITB6_MOUSE Integrin	3182800000	2269900000	3021200000	445990000	167520000	119470000	159010000	3459900000	2452300000	3957900000	1	1	1	3.1	3.1	3.1	32.256	0.0052349	1.8098	8473900000	9	1	1	1	1	1	1	1	1	1	4	2	3
570	B1AYU7;Q8C5N3-2;Q8C5N3;B1AYU4;Q6ZPL7;A2AK44;A2AK42;Q3TLI8;Q5FWA5;Q499E2;Q8BKP8;Q99LG3;J3QNR0;J3QM48;B1AYU8	B1AYU7;Q8C5N3-2;Q8C5N3;B1AYU4;Q6ZPL7;A2AK44;A2AK42;Q3TLI8;Q5FWA5	Pre-mRNA-splicing factor CWC22 homolog	Cwc22;mKIAA1604;Gm13695;Gm13697	tr|B1AYU7|B1AYU7_MOUSE Pre-mRNA-splicing factor CWC22 homolog OS=Mus musculus GN=Cwc22 PE=1 SV=1;sp|Q8C5N3-2|CWC22_MOUSE Isoform 2 of Pre-mRNA-splicing factor CWC22 homolog OS=Mus musculus GN=Cwc22;sp|Q8C5N3|CWC22_MOUSE Pre-mRNA-splicing factor CWC22 homol	985680000	1069000000	993250000	60958000	19714000	21379000	19865000	1226100000	868040000	1023800000	14	14	14	18.2	18.2	18.2	104.33	0	35.007	3047900000	30	9	12	8	9	12	8	9	12	8	10	12	8
571	B1AZ15;B1AZ14;Q3UMF0-4;Q3UMF0-2;Q3UMF0-3;Q3UMF0;B1AZ26;B1AZ25;B1AZ20;Q8BJK8	B1AZ15;B1AZ14;Q3UMF0-4;Q3UMF0-2;Q3UMF0-3;Q3UMF0	Cordon-bleu protein-like 1	Cobll1	tr|B1AZ15|B1AZ15_MOUSE Cordon-bleu protein-like 1 OS=Mus musculus GN=Cobll1 PE=1 SV=1;tr|B1AZ14|B1AZ14_MOUSE Cordon-bleu protein-like 1 OS=Mus musculus GN=Cobll1 PE=1 SV=1;sp|Q3UMF0-4|COBL1_MOUSE Isoform 4 of Cordon-bleu protein-like 1 OS=Mus musculus GN=C	7052500000	6189000000	6691200000	246080000	87068000	76408000	82607000	7081400000	6459100000	7489700000	51	51	51	56.7	56.7	56.7	133.27	0	233.95	19933000000	187	39	41	46	39	41	46	39	41	46	66	60	61
572	B1AZ39;P0C0A3;B1AZ42;B1AZ41;Q3TS10	B1AZ39;P0C0A3;B1AZ42	Charged multivesicular body protein 6	Chmp6	tr|B1AZ39|B1AZ39_MOUSE Chromatin modifying protein 6 OS=Mus musculus GN=Chmp6 PE=2 SV=1;sp|P0C0A3|CHMP6_MOUSE Charged multivesicular body protein 6 OS=Mus musculus GN=Chmp6 PE=2 SV=2;tr|B1AZ42|B1AZ42_MOUSE Charged multivesicular body protein 6 (Fragment) O	335200000	312240000	415720000	96651000	30473000	28385000	37793000	328870000	353640000	375220000	3	3	3	17.5	17.5	17.5	23.415	0	20.284	1063200000	8	2	2	3	2	2	3	2	2	3	3	2	3
573	B1AZ46;Q3UKP6;Q8BKX1-3;Q8BKX1-2;Q8BKX1;Q8BKX1-4;Q3TV50	B1AZ46;Q3UKP6;Q8BKX1-3;Q8BKX1-2;Q8BKX1;Q8BKX1-4;Q3TV50	Brain-specific angiogenesis inhibitor 1-associated protein 2	Baiap2	tr|B1AZ46|B1AZ46_MOUSE Brain-specific angiogenesis inhibitor 1-associated protein 2 OS=Mus musculus GN=Baiap2 PE=1 SV=1;tr|Q3UKP6|Q3UKP6_MOUSE Putative uncharacterized protein OS=Mus musculus GN=Baiap2 PE=2 SV=1;sp|Q8BKX1-3|BAIP2_MOUSE Isoform 3 of Brain-s	1316900000	1548900000	1227500000	97460000	31356000	36880000	29225000	1191600000	1529100000	1610800000	19	19	19	45.1	45.1	45.1	57.681	0	64.836	4093300000	63	18	17	15	18	17	15	18	17	15	29	20	14
574	D3YWD3;B1AZA5;B1AZA8;Q8C3N3	D3YWD3;B1AZA5;B1AZA8	Transmembrane protein 245	Tmem245	tr|D3YWD3|D3YWD3_MOUSE Transmembrane protein 245 OS=Mus musculus GN=Tmem245 PE=1 SV=1;sp|B1AZA5|TM245_MOUSE Transmembrane protein 245 OS=Mus musculus GN=Tmem245 PE=1 SV=1;tr|B1AZA8|B1AZA8_MOUSE Transmembrane protein 245 (Fragment) OS=Mus musculus GN=Tmem24	642440000	2386200000	544790000	132350000	23794000	88378000	20178000	1186200000	987190000	1348800000	7	7	7	11.4	11.4	11.4	97.73	0	48.067	3573400000	18	6	7	3	6	7	3	6	7	3	6	7	5
575	B1AZI6;Q3US09;E9Q5E2;Q3UYT9;Q3UUT9;F6SBF2;Q8C690;Q3TPY8;F6QCT0;B1AZI7;F6RBN0	B1AZI6;Q3US09	THO complex subunit 2	Thoc2	sp|B1AZI6|THOC2_MOUSE THO complex subunit 2 OS=Mus musculus GN=Thoc2 PE=1 SV=1;tr|Q3US09|Q3US09_MOUSE Putative uncharacterized protein (Fragment) OS=Mus musculus GN=Thoc2 PE=2 SV=1	4724700000	5257900000	4468600000	166110000	54306000	60435000	51363000	5424400000	5344500000	5039200000	41	41	41	34.2	34.2	34.2	182.77	0	145.31	14451000000	144	32	34	34	32	34	34	32	34	34	46	46	52
576	E9PUF2;Q3UCF7;B7ZNS2;B1AZP2-3;B1AZP2-2;B1AZP2;I1E4X0;F6YMR0;H3BJD4;H3BJW9;H3BKJ0;H3BL90	E9PUF2;Q3UCF7;B7ZNS2;B1AZP2-3;B1AZP2-2;B1AZP2;I1E4X0;F6YMR0	Disks large-associated protein 4	Dlgap4	tr|E9PUF2|E9PUF2_MOUSE Disks large-associated protein 4 OS=Mus musculus GN=Dlgap4 PE=1 SV=1;tr|Q3UCF7|Q3UCF7_MOUSE Putative uncharacterized protein (Fragment) OS=Mus musculus GN=Dlgap4 PE=2 SV=1;tr|B7ZNS2|B7ZNS2_MOUSE Disks large-associated protein 4 OS=Mu	436130000	336290000	396480000	83493000	31152000	24021000	28320000	329220000	384000000	451920000	7	7	7	35.1	35.1	35.1	31.596	0	33.366	1168900000	17	5	4	5	5	4	5	5	4	5	6	5	6
577	B1B0C7;E9PZ16;Q3UHH3;Q5RKM8;Q52KG8;Q2XQV0	B1B0C7;E9PZ16;Q3UHH3		Hspg2	tr|B1B0C7|B1B0C7_MOUSE Basement membrane-specific heparan sulfate proteoglycan core protein OS=Mus musculus GN=Hspg2 PE=4 SV=1;tr|E9PZ16|E9PZ16_MOUSE Basement membrane-specific heparan sulfate proteoglycan core protein OS=Mus musculus GN=Hspg2 PE=4 SV=1;tr	2189500000	2543000000	1882800000	34817000	11524000	13384000	9909500	2206400000	2385800000	2142600000	57	57	15	24	24	7	469.02	0	264.37	6615300000	137	39	44	36	39	44	36	10	13	9	40	52	45
578	B1B1A8;Q6PDN3-2;Q6PDN3-3;Q6PDN3;Q6PDN3-4;Q8CIY5;Q8CIY6	B1B1A8;Q6PDN3-2;Q6PDN3-3;Q6PDN3;Q6PDN3-4	Myosin light chain kinase, smooth muscle;Myosin light chain kinase, smooth muscle, deglutamylated form	Mylk	tr|B1B1A8|B1B1A8_MOUSE Myosin light chain kinase, smooth muscle OS=Mus musculus GN=Mylk PE=1 SV=1;sp|Q6PDN3-2|MYLK_MOUSE Isoform 2 of Myosin light chain kinase, smooth muscle OS=Mus musculus GN=Mylk;sp|Q6PDN3-3|MYLK_MOUSE Isoform 3 of Myosin light chain ki	105620000	100750000	108310000	2558400	858700	819150	880530	173750000	104420000	62248000	3	3	3	1.6	1.6	1.6	213.61	0.00098135	3.031	314680000	5	1	1	3	1	1	3	1	1	3	2	1	2
579	B1B1D8;Q9D773;B1B1D7	B1B1D8;Q9D773	39S ribosomal protein L2, mitochondrial	Mrpl2	tr|B1B1D8|B1B1D8_MOUSE 39S ribosomal protein L2, mitochondrial OS=Mus musculus GN=Mrpl2 PE=4 SV=1;sp|Q9D773|RM02_MOUSE 39S ribosomal protein L2, mitochondrial OS=Mus musculus GN=Mrpl2 PE=2 SV=1	723040000	1012800000	848280000	136010000	38055000	53305000	44646000	942340000	871250000	810380000	7	7	7	29.6	29.6	29.6	33.099	0	35.154	2584100000	26	4	6	4	4	6	4	4	6	4	10	8	8
580	B1GX80;B1GX81;Q61036-2;Q61036;A3KGC5;A3KGC3;A3KGC4;A3KGC2	B1GX80;B1GX81;Q61036-2;Q61036;A3KGC5	Non-specific serine/threonine protein kinase;Serine/threonine-protein kinase PAK 3	Pak3	tr|B1GX80|B1GX80_MOUSE PAK3c protein OS=Mus musculus GN=Pak3 PE=2 SV=1;tr|B1GX81|B1GX81_MOUSE PAK3cb protein OS=Mus musculus GN=Pak3 PE=2 SV=1;sp|Q61036-2|PAK3_MOUSE Isoform 2 of Serine/threonine-protein kinase PAK 3 OS=Mus musculus GN=Pak3;sp|Q61036|PAK3_	141680000	111930000	28292000	9396700	4722600	3731000	943080	164870000	98062000	0	13	3	3	27.6	9	9	63.001	0	23.734	281900000	4	12	10	10	3	3	2	3	3	2	2	1	1
581	S4R1B9;B1Q2W7;D3YZK4;Q80UV9-3;Q80UV9;A0A067XG50;Q80UV9-2	S4R1B9;B1Q2W7;D3YZK4;Q80UV9-3;Q80UV9;A0A067XG50	Transcription initiation factor TFIID subunit 1	Taf1	tr|S4R1B9|S4R1B9_MOUSE Transcription initiation factor TFIID subunit 1 OS=Mus musculus GN=Taf1 PE=1 SV=1;tr|B1Q2W7|B1Q2W7_MOUSE TAF1 RNA polymerase II, TATA box binding protein (TBP)-associated factor, neuron specific isoform OS=Mus musculus GN=Taf1 PE=2 S	1545700000	252610000	186900000	23355000	18184000	2971900	2198800	775000000	791460000	700740000	10	10	10	7.5	7.5	7.5	197.37	0	21.703	1985200000	21	8	8	6	8	8	6	8	8	6	7	7	7
582	B2CY77;P14206	B2CY77;P14206	40S ribosomal protein SA	Rpsa	tr|B2CY77|B2CY77_MOUSE Laminin receptor (Fragment) OS=Mus musculus GN=Rpsa PE=2 SV=1;sp|P14206|RSSA_MOUSE 40S ribosomal protein SA OS=Mus musculus GN=Rpsa PE=1 SV=4	42139000000	36725000000	40844000000	7980500000	2809300000	2448300000	2722900000	51010000000	35182000000	43385000000	14	14	14	57.6	57.6	57.6	32.85	0	190.17	119710000000	203	13	14	13	13	14	13	13	14	13	73	59	71
583	B2KF10;B2KF11;Q80ZU2;Q8CDD8-2;Q8CDD8	B2KF10;B2KF11;Q80ZU2;Q8CDD8-2;Q8CDD8	BTB/POZ domain-containing protein KCTD20	Kctd20	tr|B2KF10|B2KF10_MOUSE BTB/POZ domain-containing protein KCTD20 (Fragment) OS=Mus musculus GN=Kctd20 PE=4 SV=1;tr|B2KF11|B2KF11_MOUSE BTB/POZ domain-containing protein KCTD20 (Fragment) OS=Mus musculus GN=Kctd20 PE=4 SV=1;tr|Q80ZU2|Q80ZU2_MOUSE Kctd20 prot	0	65831000	11428000	5150600	0	4388700	761840	0	62187000	0	2	2	2	16.8	16.8	16.8	22.548	0.0016427	2.5733	77258000	2	0	1	1	0	1	1	0	1	1	0	1	1
584	B2KF54;B2KF52;Q3TT38	B2KF54;B2KF52;Q3TT38	Uncharacterized protein C6orf106 homolog	D17Wsu92e	tr|B2KF54|B2KF54_MOUSE DNA segment, Chr 17, Wayne State University 92, expressed OS=Mus musculus GN=D17Wsu92e PE=2 SV=1;tr|B2KF52|B2KF52_MOUSE Uncharacterized protein C6orf106 homolog OS=Mus musculus GN=D17Wsu92e PE=4 SV=1;sp|Q3TT38|CF106_MOUSE Uncharacter	0	12600000	12716000	3164500	0	1575000	1589500	0	12356000	12692000	1	1	1	8.8	8.8	8.8	23.929	0.0042395	2.009	25316000	2	0	1	1	0	1	1	0	1	1	0	1	1
585	B2KFW6;Q9QWH1;Q9QWH1-2;B1ASA3;B1ASA2	B2KFW6;Q9QWH1;Q9QWH1-2	Polyhomeotic-like protein 2	Phc2	tr|B2KFW6|B2KFW6_MOUSE Polyhomeotic-like 2 (Drosophila) OS=Mus musculus GN=Phc2 PE=4 SV=1;sp|Q9QWH1|PHC2_MOUSE Polyhomeotic-like protein 2 OS=Mus musculus GN=Phc2 PE=1 SV=1;sp|Q9QWH1-2|PHC2_MOUSE Isoform 2 of Polyhomeotic-like protein 2 OS=Mus musculus GN=	1149800000	1161100000	858030000	79222000	28744000	29027000	21451000	1197400000	1073300000	975500000	11	11	10	17.3	17.3	15.8	89.754	0	36.167	3168900000	44	9	10	9	9	10	9	8	9	8	17	13	14
586	Q3UDM8;B2KGF0;Q8VEE0;M0QWJ2;M0QWQ0;Q91VZ4;Q62505	Q3UDM8;B2KGF0;Q8VEE0;M0QWJ2;M0QWQ0;Q91VZ4;Q62505	Ribulose-phosphate 3-epimerase	Rpe	tr|Q3UDM8|Q3UDM8_MOUSE Ribulose-phosphate 3-epimerase OS=Mus musculus GN=Rpe PE=2 SV=1;tr|B2KGF0|B2KGF0_MOUSE Ribulose-phosphate 3-epimerase OS=Mus musculus GN=Rpe PE=3 SV=1;sp|Q8VEE0|RPE_MOUSE Ribulose-phosphate 3-epimerase OS=Mus musculus GN=Rpe PE=2 SV=	1187800000	1248200000	997190000	312110000	107980000	113480000	90654000	1028700000	1548700000	1570000000	2	2	2	17.5	17.5	17.5	24.961	0	40.437	3433200000	12	2	2	2	2	2	2	2	2	2	5	4	3
587	B2LVG5;B2LVG6;E0CXT7;Q8BQZ5;Q8BQZ5-3;Q8BQZ5-2;F7B6Z5;M0QWM8	B2LVG5;B2LVG6;E0CXT7;Q8BQZ5;Q8BQZ5-3;Q8BQZ5-2;F7B6Z5	Cleavage and polyadenylation specificity factor subunit 4	Cpsf4	tr|B2LVG5|B2LVG5_MOUSE Cleavage and polyadenylation specific factor 4 isoform 1 OS=Mus musculus GN=Cpsf4 PE=2 SV=1;tr|B2LVG6|B2LVG6_MOUSE Cleavage and polyadenylation specific factor 4 isoform 2 OS=Mus musculus GN=Cpsf4 PE=2 SV=1;tr|E0CXT7|E0CXT7_MOUSE Cle	1172600000	816520000	1000100000	175830000	68975000	48031000	58829000	1106900000	1164500000	1032700000	9	9	9	50.6	50.6	50.6	27.419	0	28.24	2989200000	32	9	6	6	9	6	6	9	6	6	13	8	11
588	B2M0S5;Q8BPI1-2;Q8BPI1	B2M0S5;Q8BPI1-2;Q8BPI1	Protein kintoun	Dnaaf2	tr|B2M0S5|B2M0S5_MOUSE TU54 OS=Mus musculus GN=Dnaaf2 PE=2 SV=1;sp|Q8BPI1-2|KTU_MOUSE Isoform 2 of Protein kintoun OS=Mus musculus GN=Dnaaf2;sp|Q8BPI1|KTU_MOUSE Protein kintoun OS=Mus musculus GN=Dnaaf2 PE=1 SV=2	7409600	0	0	1234900	1234900	0	0	8683900	0	0	1	1	1	12.7	12.7	12.7	18.325	0.0097398	1.5265	7409600	1	1	0	0	1	0	0	1	0	0	1	0	0
589	B2M1R6;Q3TL71;P61979-3;Q3U9Q3;Q3U6X2;H3BKD0;H3BKI8;H3BLP7;Q8BT23;H3BJ43;H3BJS9	B2M1R6;Q3TL71;P61979-3;Q3U9Q3;Q3U6X2;H3BKD0	Heterogeneous nuclear ribonucleoprotein K	Hnrnpk	tr|B2M1R6|B2M1R6_MOUSE Heterogeneous nuclear ribonucleoprotein K OS=Mus musculus GN=Hnrnpk PE=1 SV=1;tr|Q3TL71|Q3TL71_MOUSE Putative uncharacterized protein OS=Mus musculus GN=Hnrnpk PE=2 SV=1;sp|P61979-3|HNRPK_MOUSE Isoform 3 of Heterogeneous nuclear ribo	117280000	485280000	1080800000	60119000	4188500	17331000	38599000	208490000	740070000	855420000	30	1	0	65.2	2.7	0	48.562	0.00028839	3.5973	1683300000	9	29	29	28	1	1	1	0	0	0	3	2	4
590	B2M1R7;Q61990-3;Q3TF69	B2M1R7;Q61990-3;Q3TF69	Poly(rC)-binding protein 2	Pcbp2	tr|B2M1R7|B2M1R7_MOUSE Poly(RC) binding protein 2 OS=Mus musculus GN=Pcbp2 PE=2 SV=1;sp|Q61990-3|PCBP2_MOUSE Isoform 3 of Poly(rC)-binding protein 2 OS=Mus musculus GN=Pcbp2;tr|Q3TF69|Q3TF69_MOUSE Putative uncharacterized protein OS=Mus musculus GN=Pcbp2 P	25135000000	19794000000	23962000000	3444600000	1256700000	989720000	1198100000	26333000000	21543000000	22501000000	20	20	1	69.3	69.3	8	38.15	0	213.49	68891000000	117	17	19	16	17	19	16	1	1	1	48	40	29
591	Q3UWP8;B2MWM9;P14211	Q3UWP8;B2MWM9;P14211	Calreticulin	Calr	tr|Q3UWP8|Q3UWP8_MOUSE Putative uncharacterized protein (Fragment) OS=Mus musculus GN=Calr PE=2 SV=1;tr|B2MWM9|B2MWM9_MOUSE Calreticulin OS=Mus musculus GN=Calr PE=2 SV=1;sp|P14211|CALR_MOUSE Calreticulin OS=Mus musculus GN=Calr PE=1 SV=1	89891000000	92906000000	87834000000	10825000000	3595600000	3716200000	3513400000	89163000000	86693000000	88330000000	27	27	27	72.3	72.3	72.3	42.195	0	323.31	270630000000	376	25	26	26	25	26	26	25	26	26	121	133	122
592	B2RPS1;Q0PD56;P61021;Q8C458	B2RPS1;Q0PD56;P61021;Q8C458	Ras-related protein Rab-5B	Rab5b	tr|B2RPS1|B2RPS1_MOUSE RAB5B, member RAS oncogene family OS=Mus musculus GN=Rab5b PE=2 SV=1;tr|Q0PD56|Q0PD56_MOUSE Rab5B OS=Mus musculus GN=Rab5b PE=2 SV=1;sp|P61021|RAB5B_MOUSE Ras-related protein Rab-5B OS=Mus musculus GN=Rab5b PE=1 SV=1;tr|Q8C458|Q8C458	2525000000	1987400000	2614600000	509070000	180360000	141960000	186760000	2612900000	2288200000	2505000000	9	7	7	67.4	57.2	57.2	23.707	0	63.889	7127000000	41	8	9	8	6	7	6	6	7	6	14	13	14
593	B7ZMP6;B2RPS7;Q61056-2;Q61056;REV__A2ACC7;REV__C9K0Z4;REV__Q03391;REV__Q8BQZ4;REV__F8WHN4;REV__A2ACC6;REV__E9Q0J2;REV__B2RRF1	B7ZMP6;B2RPS7;Q61056-2;Q61056;REV__A2ACC7;REV__C9K0Z4;REV__Q03391;REV__Q8BQZ4;REV__F8WHN4;REV__A2ACC6;REV__E9Q0J2;REV__B2RRF1	Short transient receptor potential channel 1	Trpc1	tr|B7ZMP6|B7ZMP6_MOUSE Transient receptor potential cation channel, subfamily C, member 1, isoform CRA_d OS=Mus musculus GN=Trpc1 PE=2 SV=1;tr|B2RPS7|B2RPS7_MOUSE Short transient receptor potential channel 1 OS=Mus musculus GN=Trpc1 PE=2 SV=1;sp|Q61056-2|T	445350000	346620000	198300000	23578000	10604000	8252800	4721500	379160000	329080000	317560000	2	2	2	1.9	1.9	1.9	89.132	0.0019004	2.4359	990270000	6	2	2	1	2	2	1	2	2	1	3	2	1
594	B2RPU7;P58334;Q811R6	B2RPU7;P58334;Q811R6	Krueppel-like factor 16	Klf16	tr|B2RPU7|B2RPU7_MOUSE Kruppel-like factor 16 OS=Mus musculus GN=Klf16 PE=2 SV=1;sp|P58334|KLF16_MOUSE Krueppel-like factor 16 OS=Mus musculus GN=Klf16 PE=2 SV=2;tr|Q811R6|Q811R6_MOUSE Dopamine receptor regulating factor (Fragment) OS=Mus musculus PE=4 SV=	49463000	26390000	17952000	8527800	4496700	2399100	1632000	36309000	32841000	46145000	2	2	2	15.5	15.5	15.5	25.652	0.00014828	4.2511	93806000	5	2	1	1	2	1	1	2	1	1	3	1	1
595	D3Z5B1;Q8CEW7;B2RPU8;Q9D1L0;Q8K3S8	D3Z5B1;Q8CEW7;B2RPU8;Q9D1L0	Coiled-coil-helix-coiled-coil-helix domain-containing protein 2	Zbed5;Chchd2	tr|D3Z5B1|D3Z5B1_MOUSE Protein Zbed5 (Fragment) OS=Mus musculus GN=Zbed5 PE=4 SV=2;tr|Q8CEW7|Q8CEW7_MOUSE Putative uncharacterized protein OS=Mus musculus GN=Zbed5 PE=2 SV=1;tr|B2RPU8|B2RPU8_MOUSE MCG130675 OS=Mus musculus GN=Zbed5 PE=2 SV=1;sp|Q9D1L0|CHCH	3769200000	3473900000	2446700000	1211200000	471140000	434230000	305830000	3732800000	3046300000	3917500000	3	3	3	25.1	25.1	25.1	19.183	0	25.086	9689700000	16	3	3	3	3	3	3	3	3	3	6	5	5
596	B2RPV4;Q66JV4;Q66JV4-2;Q80YR9	B2RPV4;Q66JV4;Q66JV4-2;Q80YR9	RNA-binding protein 12B-B;RNA-binding protein 12B-A	Rbm12b2;Rbm12b1	tr|B2RPV4|B2RPV4_MOUSE C430048L16Rik protein OS=Mus musculus GN=Rbm12b2 PE=2 SV=1;sp|Q66JV4|R12BB_MOUSE RNA-binding protein 12B-B OS=Mus musculus GN=Rbm12b2 PE=2 SV=2;sp|Q66JV4-2|R12BB_MOUSE Isoform 2 of RNA-binding protein 12B-B OS=Mus musculus GN=Rbm12b2	315400000	467650000	215530000	16925000	5345700	7926300	3653100	430880000	312540000	283860000	13	13	13	17.4	17.4	17.4	96.423	0	19.482	998580000	27	8	10	6	8	10	6	8	10	6	8	12	7
597	B2RPW5;G3X9A7;Q8BLJ3	B2RPW5;G3X9A7;Q8BLJ3	PI-PLC X domain-containing protein 3	Plcxd3	tr|B2RPW5|B2RPW5_MOUSE Plcxd3 protein OS=Mus musculus GN=Plcxd3 PE=2 SV=1;tr|G3X9A7|G3X9A7_MOUSE MCG49978 OS=Mus musculus GN=Plcxd3 PE=4 SV=1;sp|Q8BLJ3|PLCX3_MOUSE PI-PLC X domain-containing protein 3 OS=Mus musculus GN=Plcxd3 PE=2 SV=1	113640000	301340000	622110000	79776000	8741800	23180000	47855000	112200000	144080000	614560000	1	1	1	2.2	2.2	2.2	30.802	1	-2	1037100000	13	1	1	1	1	1	1	1	1	1	2	5	6
598	Q8C9P8;Q8BRS0;D6RI27;B2RPZ5;Q8CDU6;D6REW0	Q8C9P8;Q8BRS0;D6RI27;B2RPZ5;Q8CDU6;D6REW0	Probable E3 ubiquitin-protein ligase HECTD2	Hectd2	tr|Q8C9P8|Q8C9P8_MOUSE Putative uncharacterized protein OS=Mus musculus GN=Hectd2 PE=2 SV=1;tr|Q8BRS0|Q8BRS0_MOUSE Putative uncharacterized protein OS=Mus musculus GN=Hectd2 PE=2 SV=1;tr|D6RI27|D6RI27_MOUSE Probable E3 ubiquitin-protein ligase HECTD2 (Frag	11268000	2584700	22671000	2809600	866800	198820	1743900	11013000	17422000	19498000	2	2	2	22.7	22.7	22.7	23.776	0.0071401	1.6917	36524000	3	1	1	2	1	1	2	1	1	2	1	1	1
599	B2RPZ7;Q8BYI8;Q8BYI8-2;Q99L10	B2RPZ7;Q8BYI8;Q8BYI8-2	Uncharacterized protein KIAA1467	8430419L09Rik;Kiaa1467	tr|B2RPZ7|B2RPZ7_MOUSE RIKEN cDNA 8430419L09 OS=Mus musculus GN=8430419L09Rik PE=2 SV=1;sp|Q8BYI8|K1467_MOUSE Uncharacterized protein KIAA1467 OS=Mus musculus GN=Kiaa1467 PE=2 SV=1;sp|Q8BYI8-2|K1467_MOUSE Isoform 2 of Uncharacterized protein KIAA1467 OS=Mu	196070000	120360000	146590000	17149000	7262000	4457700	5429300	152060000	148030000	182640000	6	6	6	13.3	13.3	13.3	67.061	0	13.617	463020000	14	4	3	4	4	3	4	4	3	4	5	4	5
600	B2RQ13;B7ZMW5;B7ZMW4;P70261	B2RQ13;B7ZMW5;B7ZMW4;P70261	Paladin	Pald1	tr|B2RQ13|B2RQ13_MOUSE X99384 protein OS=Mus musculus GN=Pald1 PE=2 SV=1;tr|B7ZMW5|B7ZMW5_MOUSE cDNA sequence X99384 OS=Mus musculus GN=Pald1 PE=2 SV=1;tr|B7ZMW4|B7ZMW4_MOUSE X99384 protein OS=Mus musculus GN=Pald1 PE=2 SV=1;sp|P70261|PALD_MOUSE Paladin OS	337290000	517460000	402540000	22860000	6132500	9408300	7318900	485810000	376100000	419190000	17	17	17	29.6	29.6	29.6	96.589	0	57.919	1257300000	29	6	13	11	6	13	11	6	13	11	7	12	10
601	B2RQ14;Q8CDA1;Q8CDA1-2;Q8CDA1-3;Q8CA68;Q8CDA1-4	B2RQ14;Q8CDA1;Q8CDA1-2;Q8CDA1-3	Phosphatidylinositide phosphatase SAC2	Inpp5f	tr|B2RQ14|B2RQ14_MOUSE Inositol polyphosphate-5-phosphatase F OS=Mus musculus GN=Inpp5f PE=2 SV=1;sp|Q8CDA1|SAC2_MOUSE Phosphatidylinositide phosphatase SAC2 OS=Mus musculus GN=Inpp5f PE=1 SV=1;sp|Q8CDA1-2|SAC2_MOUSE Isoform 2 of Phosphatidylinositide phos	1572600000	1161600000	1705800000	63429000	22466000	16595000	24368000	1648800000	1498600000	1644900000	24	24	24	28.5	28.5	28.5	127.61	0	55.188	4440000000	53	19	16	15	19	16	15	19	16	15	18	15	20
602	B2RQ18;Q80YW7	B2RQ18	Peptidyl-prolyl cis-trans isomerase	Fkbp15	tr|B2RQ18|B2RQ18_MOUSE Peptidyl-prolyl cis-trans isomerase OS=Mus musculus GN=Fkbp15 PE=2 SV=1	0	0	0	0	0	0	0	0	0	0	20	1	1	24.5	1.2	1.2	131.78	1	-2	0	0	15	14	13	1	0	0	1	0	0	0	0	0
603	B2RQ36;Q8R4C2;Q05D93;Q8BR30;Q9CSV9;D3Z4D2;Q8C424;D6RET4;D3Z7T9	B2RQ36;Q8R4C2;Q05D93;Q8BR30;Q9CSV9;D3Z4D2;Q8C424	RUN and FYVE domain-containing protein 2	Rufy2	tr|B2RQ36|B2RQ36_MOUSE RUN and FYVE domain-containing 2 OS=Mus musculus GN=Rufy2 PE=2 SV=1;sp|Q8R4C2|RUFY2_MOUSE RUN and FYVE domain-containing protein 2 OS=Mus musculus GN=Rufy2 PE=1 SV=2;tr|Q05D93|Q05D93_MOUSE Rufy2 protein (Fragment) OS=Mus musculus GN=	560350000	319810000	473450000	29426000	12181000	6952300	10292000	433100000	490280000	470770000	14	14	13	28.1	28.1	27.1	70.092	0	32.239	1353600000	31	11	7	11	11	7	11	10	6	10	15	7	9
604	B7ZMZ2;B2RQ57;F8VQH0;Q4JIM5;Q99P28;Q61055;G3UWQ2	B7ZMZ2;B2RQ57;F8VQH0;Q4JIM5	Non-specific protein-tyrosine kinase;Abelson tyrosine-protein kinase 2	Abl2	tr|B7ZMZ2|B7ZMZ2_MOUSE V-abl Abelson murine leukemia viral oncogene homolog 2 (Arg, Abelson-related gene) OS=Mus musculus GN=Abl2 PE=2 SV=1;tr|B2RQ57|B2RQ57_MOUSE Abelson tyrosine-protein kinase 2 OS=Mus musculus GN=Abl2 PE=1 SV=1;tr|F8VQH0|F8VQH0_MOUSE Ab	169620000	212400000	140820000	9682100	3141100	3933300	2607700	146020000	194000000	164810000	14	14	11	19.8	19.8	16	117.78	0	44.721	522830000	24	10	8	6	10	8	6	8	8	4	11	8	5
605	B2RQ71;E9PWR4;B7ZMZ7;Q69ZV2;Q6NY04;Q6PGL8;Q5EBR0;Q8CBE5	B2RQ71;E9PWR4;B7ZMZ7;Q69ZV2		Dip2c	tr|B2RQ71|B2RQ71_MOUSE Dip2c protein OS=Mus musculus GN=Dip2c PE=2 SV=1;tr|E9PWR4|E9PWR4_MOUSE Protein Dip2c OS=Mus musculus GN=Dip2c PE=4 SV=1;tr|B7ZMZ7|B7ZMZ7_MOUSE Dip2c protein OS=Mus musculus GN=Dip2c PE=2 SV=1;tr|Q69ZV2|Q69ZV2_MOUSE MKIAA0934 protein	142730000	217090000	225400000	7315200	1784100	2713600	2817500	181380000	201880000	227040000	15	10	10	13.9	9	9	170.92	0	27.168	585220000	18	10	11	11	6	7	7	6	7	7	5	7	6
606	B2RQA7	B2RQA7		Ncapg	tr|B2RQA7|B2RQA7_MOUSE Ncapg protein OS=Mus musculus GN=Ncapg PE=2 SV=1	153700000	104050000	156090000	11824000	4391300	2972900	4459800	194290000	105390000	159980000	22	1	1	45.1	2.1	2.1	73.801	1	-2	413840000	3	18	21	19	1	1	1	1	1	1	1	1	1
607	Q8BY93;Q8C0Z2;B2RQC2	Q8BY93;Q8C0Z2;B2RQC2	Ubiquitin carboxyl-terminal hydrolase 42	Usp42	tr|Q8BY93|Q8BY93_MOUSE Putative uncharacterized protein (Fragment) OS=Mus musculus GN=Usp42 PE=2 SV=1;tr|Q8C0Z2|Q8C0Z2_MOUSE Putative uncharacterized protein (Fragment) OS=Mus musculus GN=Usp42 PE=2 SV=2;sp|B2RQC2|UBP42_MOUSE Ubiquitin carboxyl-terminal hy	0	0	0	0	0	0	0	0	0	0	1	1	1	3.8	3.8	3.8	46.413	0.0052253	1.7886	0	1	0	0	1	0	0	1	0	0	1	0	0	1
608	B2RQC6;E9QAI5;G3UWN2;B2RQC6-2;Q6P9L1;E9QAT6;Q7TN13;Q80VF8;F6S3Z3;Q9CWQ9;Q8C196;Q561M8;O88862	B2RQC6;E9QAI5;G3UWN2;B2RQC6-2;Q6P9L1	CAD protein;Glutamine-dependent carbamoyl-phosphate synthase;Aspartate carbamoyltransferase;Dihydroorotase	Cad	sp|B2RQC6|PYR1_MOUSE CAD protein OS=Mus musculus GN=Cad PE=2 SV=1;tr|E9QAI5|E9QAI5_MOUSE CAD protein OS=Mus musculus GN=Cad PE=3 SV=1;tr|G3UWN2|G3UWN2_MOUSE CAD protein OS=Mus musculus GN=Cad PE=3 SV=1;sp|B2RQC6-2|PYR1_MOUSE Isoform 2 of CAD protein OS=Mus	28626000000	30248000000	31057000000	749430000	238550000	252070000	258810000	31107000000	30904000000	32755000000	89	89	89	58.5	58.5	58.5	243.24	0	323.31	89931000000	486	77	81	80	77	81	80	77	81	80	165	157	164
609	B2RQC7;D3Z5G8;Q3UH60-2	B2RQC7;D3Z5G8;Q3UH60-2	Disco-interacting protein 2 homolog B	Dip2b	tr|B2RQC7|B2RQC7_MOUSE DIP2 disco-interacting protein 2 homolog B (Drosophila) OS=Mus musculus GN=Dip2b PE=2 SV=1;tr|D3Z5G8|D3Z5G8_MOUSE Disco-interacting protein 2 homolog B OS=Mus musculus GN=Dip2b PE=4 SV=1;sp|Q3UH60-2|DIP2B_MOUSE Isoform 2 of Disco-int	130880000	96390000	78133000	4072100	1745100	1285200	1041800	130880000	92474000	84014000	30	1	1	33.4	1.9	1.9	146.7	1	-2	305410000	3	18	22	23	1	1	1	1	1	1	1	1	1
610	B2RQE8;Q9D333	B2RQE8	Rho GTPase-activating protein 42	Arhgap42	sp|B2RQE8|RHG42_MOUSE Rho GTPase-activating protein 42 OS=Mus musculus GN=Arhgap42 PE=1 SV=1	0	15283000	64790000	1380600	0	263490	1117100	0	22460000	74136000	6	6	6	9.8	9.8	9.8	94.635	0.0001527	4.9143	80072000	7	0	3	4	0	3	4	0	3	4	0	3	4
611	B2RQG2;Q80U54;Q4FZG1;A0PJJ1;Q8VCJ7;Q8BLA7;Q8BU94	B2RQG2;Q80U54		Phf3	tr|B2RQG2|B2RQG2_MOUSE PHD finger protein 3 OS=Mus musculus GN=Phf3 PE=1 SV=1;tr|Q80U54|Q80U54_MOUSE MKIAA0244 protein (Fragment) OS=Mus musculus GN=Phf3 PE=2 SV=1	547070000	624060000	546450000	14680000	4675800	5333900	4670500	566160000	641600000	633590000	21	21	21	15.8	15.8	15.8	225.54	0	77.571	1717600000	35	13	12	14	13	12	14	13	12	14	13	10	12
612	B2RQQ7;Q7TT50	B2RQQ7;Q7TT50	Non-specific serine/threonine protein kinase;Serine/threonine-protein kinase MRCK beta	Cdc42bpb	tr|B2RQQ7|B2RQQ7_MOUSE CDC42 binding protein kinase beta OS=Mus musculus GN=Cdc42bpb PE=2 SV=1;sp|Q7TT50|MRCKB_MOUSE Serine/threonine-protein kinase MRCK beta OS=Mus musculus GN=Cdc42bpb PE=1 SV=2	2922700000	2644100000	2511900000	85943000	31092000	28129000	26722000	2793200000	2524000000	3071400000	43	43	40	32.1	32.1	30.2	194.73	0	148.83	8078700000	109	28	36	33	28	36	33	25	33	31	33	42	34
613	B2RQQ8;P08122;D3YV27	B2RQQ8;P08122	Collagen alpha-2(IV) chain;Canstatin	Col4a2	tr|B2RQQ8|B2RQQ8_MOUSE Collagen, type IV, alpha 2 OS=Mus musculus GN=Col4a2 PE=2 SV=1;sp|P08122|CO4A2_MOUSE Collagen alpha-2(IV) chain OS=Mus musculus GN=Col4a2 PE=2 SV=4	478250000	604080000	693600000	18893000	5087800	6426300	7378700	597440000	682980000	726910000	7	7	7	6.9	6.9	6.9	167.32	0	24.211	1775900000	24	5	6	5	5	6	5	5	6	5	7	9	8
614	B2RQS1;Q3UTR6;Q3TNV4;B3STQ1;B3STQ3	B2RQS1		Strn3	tr|B2RQS1|B2RQS1_MOUSE Striatin-3 OS=Mus musculus GN=Strn3 PE=1 SV=1	4231400000	3777600000	4295800000	439460000	151120000	134910000	153420000	4150000000	4093300000	4261800000	19	17	1	37.8	36	2.8	77.731	0	106.16	12305000000	74	19	16	18	17	14	16	1	1	1	23	22	29
615	B2RQV1;Q8BWZ3;Q8BWZ3-2;Q8BKH5;Q8BY54;Q8BKI9;G3UZ51;F6XQZ4	B2RQV1;Q8BWZ3;Q8BWZ3-2;Q8BKH5	N-alpha-acetyltransferase 25, NatB auxiliary subunit	Naa25	tr|B2RQV1|B2RQV1_MOUSE RIKEN cDNA C330023M02, isoform CRA_a OS=Mus musculus GN=Naa25 PE=2 SV=1;sp|Q8BWZ3|NAA25_MOUSE N-alpha-acetyltransferase 25, NatB auxiliary subunit OS=Mus musculus GN=Naa25 PE=2 SV=1;sp|Q8BWZ3-2|NAA25_MOUSE Isoform 2 of N-alpha-acetyl	2206300000	2909900000	2535900000	141710000	40858000	53888000	46961000	2220700000	2982600000	2754800000	29	29	29	39.9	39.9	39.9	111.71	0	72.708	7652100000	80	23	19	21	23	19	21	23	19	21	30	24	26
616	B2RQW1;Q3U4L9;D3Z4L9;Q61333;G3XA62;G3UWJ7;G3UXC6	B2RQW1;Q3U4L9;D3Z4L9;Q61333	Tumor necrosis factor alpha-induced protein 2	Tnfaip2	tr|B2RQW1|B2RQW1_MOUSE Tumor necrosis factor, alpha-induced protein 2 OS=Mus musculus GN=Tnfaip2 PE=2 SV=1;tr|Q3U4L9|Q3U4L9_MOUSE Putative uncharacterized protein OS=Mus musculus GN=Tnfaip2 PE=2 SV=1;tr|D3Z4L9|D3Z4L9_MOUSE Tumor necrosis factor alpha-induc	378860000	257120000	508260000	28606000	9471500	6428000	12706000	437420000	381270000	373240000	13	13	13	26.8	26.8	26.8	73.671	0	23.42	1144200000	22	7	6	9	7	6	9	7	6	9	8	6	8
617	D3YZN4;Q7TNG0;D3Z1Z1;B2RQY8;Q3ULF4;D3YXB7;G3UX97;D3Z342;F6W695	D3YZN4;Q7TNG0;D3Z1Z1;B2RQY8;Q3ULF4;D3YXB7	Paraplegin	Spg7	tr|D3YZN4|D3YZN4_MOUSE Paraplegin OS=Mus musculus GN=Spg7 PE=1 SV=1;tr|Q7TNG0|Q7TNG0_MOUSE Spg7 protein (Fragment) OS=Mus musculus GN=Spg7 PE=2 SV=1;tr|D3Z1Z1|D3Z1Z1_MOUSE Paraplegin OS=Mus musculus GN=Spg7 PE=1 SV=1;tr|B2RQY8|B2RQY8_MOUSE Spastic parapleg	241490000	460580000	514350000	29669000	5890000	11234000	12545000	295400000	498110000	544300000	15	15	15	32.5	32.5	32.5	75.002	0	25.487	1216400000	26	6	12	8	6	12	8	6	12	8	6	12	8
618	B2RR26;Q8BZW8;Q9CW64;Q8C1S8	B2RR26;Q8BZW8;Q9CW64	NHL repeat-containing protein 2	Nhlrc2	tr|B2RR26|B2RR26_MOUSE NHL repeat containing 2 OS=Mus musculus GN=Nhlrc2 PE=2 SV=1;sp|Q8BZW8|NHLC2_MOUSE NHL repeat-containing protein 2 OS=Mus musculus GN=Nhlrc2 PE=2 SV=1;tr|Q9CW64|Q9CW64_MOUSE Putative uncharacterized protein (Fragment) OS=Mus musculus	2094600000	1791900000	1560200000	175700000	67569000	57805000	50328000	1902300000	2048900000	1894000000	26	26	25	62.3	62.3	61.5	78.429	0	109.9	5446800000	79	22	17	18	22	17	18	21	17	17	30	25	24
619	B7ZNE9;B2RR42;Q499E4-2;Q499E4;D3Z4F5	B7ZNE9;B2RR42;Q499E4-2;Q499E4	Zinc finger protein DZIP1L	Dzip1l	tr|B7ZNE9|B7ZNE9_MOUSE Dzip1l protein OS=Mus musculus GN=Dzip1l PE=2 SV=1;tr|B2RR42|B2RR42_MOUSE DAZ interacting protein 1-like OS=Mus musculus GN=Dzip1l PE=2 SV=1;sp|Q499E4-2|DZI1L_MOUSE Isoform 2 of Zinc finger protein DZIP1L OS=Mus musculus GN=Dzip1l;sp	14328000	32304000	54766000	1988200	280930	633410	1073800	0	41960000	47948000	4	4	4	6.1	6.1	6.1	87.492	0	8.1001	101400000	7	1	2	3	1	2	3	1	2	3	1	2	4
620	B2RR67;Q9WVQ0	B2RR67;Q9WVQ0	Polyamine-modulated factor 1-binding protein 1	Pmfbp1	tr|B2RR67|B2RR67_MOUSE Polyamine modulated factor 1 binding protein 1 OS=Mus musculus GN=Pmfbp1 PE=2 SV=1;sp|Q9WVQ0|PMFBP_MOUSE Polyamine-modulated factor 1-binding protein 1 OS=Mus musculus GN=Pmfbp1 PE=2 SV=1	1008500000	668690000	478050000	28736000	13446000	8915900	6374000	769920000	827220000	455880000	3	3	3	1.9	1.9	1.9	119.4	0.0016391	2.5104	2155200000	6	3	2	2	3	2	2	3	2	2	3	1	2
621	E9QNG1;B2RR82;Q9Z0R6;Q80TG5;Q9Z0R6-2;Q3TQ85;Q3V3Y8;Q8CD59;F6U8U1	E9QNG1;B2RR82;Q9Z0R6;Q80TG5;Q9Z0R6-2;Q3TQ85;Q3V3Y8	Intersectin-2	Itsn2;mKIAA1256	tr|E9QNG1|E9QNG1_MOUSE Intersectin-2 OS=Mus musculus GN=Itsn2 PE=1 SV=1;tr|B2RR82|B2RR82_MOUSE Itsn2 protein OS=Mus musculus GN=Itsn2 PE=2 SV=1;sp|Q9Z0R6|ITSN2_MOUSE Intersectin-2 OS=Mus musculus GN=Itsn2 PE=1 SV=2;tr|Q80TG5|Q80TG5_MOUSE MKIAA1256 protein	442080000	788920000	540130000	18449000	4605000	8217900	5626300	509130000	543650000	831830000	20	17	17	16.6	15.4	15.4	188.78	0	66.832	1771100000	42	14	18	11	11	16	9	11	16	9	13	18	11
622	B2RR83;Q3UST9	B2RR83	Probable ATP-dependent RNA helicase YTHDC2	Ythdc2	sp|B2RR83|YTDC2_MOUSE Probable ATP-dependent RNA helicase YTHDC2 OS=Mus musculus GN=Ythdc2 PE=1 SV=1	450920000	778600000	501010000	19228000	5010200	8651200	5566800	593250000	578320000	597440000	23	23	23	23.6	23.6	23.6	161.09	0	54.609	1730500000	39	13	17	11	13	17	11	13	17	11	13	15	11
623	B2RRD7;E9PXP1;Q80XK2;Q3U109;Q99JV4;Q8C905;B7ZNI3;Q2V6Q0;Q9CTY1;Q8K2E3;Q3TRM7;Q6ZPU7;B2KF05	B2RRD7;E9PXP1;Q80XK2;Q3U109;Q99JV4;Q8C905;B7ZNI3		Brpf1	tr|B2RRD7|B2RRD7_MOUSE Bromodomain and PHD finger containing, 1 OS=Mus musculus GN=Brpf1 PE=1 SV=1;tr|E9PXP1|E9PXP1_MOUSE Protein Brpf1 OS=Mus musculus GN=Brpf1 PE=1 SV=1;tr|Q80XK2|Q80XK2_MOUSE Bromodomain and PHD finger containing, 1 OS=Mus musculus GN=Br	85265000	229920000	91617000	5895700	1235700	3332200	1327800	78265000	277300000	54448000	8	8	8	9	9	9	137.31	0.00016311	6.7849	406810000	11	3	6	1	3	6	1	3	6	1	3	6	2
624	B2RRE0;Q9WTQ5;Q9WTQ5-2;Q6IR43	B2RRE0;Q9WTQ5;Q9WTQ5-2	A-kinase anchor protein 12	Akap12	tr|B2RRE0|B2RRE0_MOUSE A kinase (PRKA) anchor protein (Gravin) 12 OS=Mus musculus GN=Akap12 PE=2 SV=1;sp|Q9WTQ5|AKA12_MOUSE A-kinase anchor protein 12 OS=Mus musculus GN=Akap12 PE=1 SV=1;sp|Q9WTQ5-2|AKA12_MOUSE Isoform 2 of A-kinase anchor protein 12 OS=Mu	17717000000	18430000000	15726000000	673680000	230080000	239350000	204240000	16350000000	18793000000	17882000000	62	62	62	57.4	57.4	57.4	180.69	0	323.31	51873000000	288	53	55	56	53	55	56	53	55	56	97	92	99
625	K3W4L0;B2RRE2;E9QAX2;Q9JMH9-1;Q9JMH9;Q9JMH9-6;Q9JMH9-4;E9Q405;Q9JMH9-5;Q9JMH9-7;Q9JMH9-2;E9QA74;Q3UIM4;Q6PER1	K3W4L0;B2RRE2;E9QAX2;Q9JMH9-1;Q9JMH9;Q9JMH9-6;Q9JMH9-4;E9Q405;Q9JMH9-5;Q9JMH9-7;Q9JMH9-2;E9QA74	Unconventional myosin-XVIIIa	Myo18a	tr|K3W4L0|K3W4L0_MOUSE Unconventional myosin-XVIIIa OS=Mus musculus GN=Myo18a PE=1 SV=1;tr|B2RRE2|B2RRE2_MOUSE Myo18a protein OS=Mus musculus GN=Myo18a PE=1 SV=1;tr|E9QAX2|E9QAX2_MOUSE Unconventional myosin-XVIIIa OS=Mus musculus GN=Myo18a PE=1 SV=1;sp|Q9J	3355000000	3628600000	2665800000	70433000	24489000	26486000	19458000	3514800000	3004100000	3340500000	57	57	57	36.7	36.7	36.7	230.99	0	254.47	9649300000	142	38	45	37	38	45	37	38	45	37	52	44	46
626	B2RRE3;H7BX08;Q8C1B1;Q8C1B1-2	B2RRE3;H7BX08;Q8C1B1;Q8C1B1-2	Calmodulin-regulated spectrin-associated protein 2	Camsap2	tr|B2RRE3|B2RRE3_MOUSE Camsap1l1 protein OS=Mus musculus GN=Camsap2 PE=2 SV=1;tr|H7BX08|H7BX08_MOUSE Calmodulin-regulated spectrin-associated protein 2 OS=Mus musculus GN=Camsap2 PE=1 SV=1;sp|Q8C1B1|CAMP2_MOUSE Calmodulin-regulated spectrin-associated prot	572070000	863010000	1061600000	28371000	6500800	9807000	12064000	982270000	760170000	869840000	23	23	23	22.4	22.4	22.4	165.66	0	58.879	2496700000	45	15	19	12	15	19	12	15	19	12	19	17	9
627	B2RRE7;G3UXM1;G3UXQ0	B2RRE7	OTU domain-containing protein 4	Otud4	sp|B2RRE7|OTUD4_MOUSE OTU domain-containing protein 4 OS=Mus musculus GN=Otud4 PE=1 SV=1	672140000	768210000	839030000	42211000	12447000	14226000	15538000	727960000	796900000	781270000	19	19	19	25.9	25.9	25.9	123.05	0	69.425	2279400000	40	11	12	13	11	12	13	11	12	13	12	14	14
628	B2RRE8;Q9JLQ0	B2RRE8;Q9JLQ0	CD2-associated protein	Cd2ap	tr|B2RRE8|B2RRE8_MOUSE CD2-associated protein OS=Mus musculus GN=Cd2ap PE=2 SV=1;sp|Q9JLQ0|CD2AP_MOUSE CD2-associated protein OS=Mus musculus GN=Cd2ap PE=1 SV=3	2689000000	2459600000	1946400000	173050000	65584000	59990000	47474000	2289100000	2408200000	2801500000	20	20	20	42.4	42.4	42.4	70.431	0	71.592	7095000000	70	17	18	15	17	18	15	17	18	15	27	23	20
629	B2RRF0;P35822;Q8C819;Q99KV5	B2RRF0;P35822	Protein-tyrosine-phosphatase;Receptor-type tyrosine-protein phosphatase kappa	Ptprk	tr|B2RRF0|B2RRF0_MOUSE Ptprk protein OS=Mus musculus GN=Ptprk PE=2 SV=1;sp|P35822|PTPRK_MOUSE Receptor-type tyrosine-protein phosphatase kappa OS=Mus musculus GN=Ptprk PE=1 SV=1	48006000	128360000	58272000	3170700	648730	1734600	787460	84027000	79540000	84302000	5	5	5	6.3	6.3	6.3	163	0	11.876	234630000	9	2	4	3	2	4	3	2	4	3	2	4	3
630	B2RRH9;Q3THK7	B2RRH9;Q3THK7	GMP synthase [glutamine-hydrolyzing]	Gmps	tr|B2RRH9|B2RRH9_MOUSE Guanine monphosphate synthetase OS=Mus musculus GN=Gmps PE=2 SV=1;sp|Q3THK7|GUAA_MOUSE GMP synthase [glutamine-hydrolyzing] OS=Mus musculus GN=Gmps PE=1 SV=2	16108000000	14929000000	13887000000	916830000	328730000	304680000	283410000	16452000000	14734000000	14634000000	36	36	36	66.2	66.2	66.2	76.723	0	319.72	44924000000	171	29	35	32	29	35	32	29	35	32	63	56	52
631	Q3UEC0;Q3UV09;Q3UEW9;B7ZNJ0;B2RRI4;B2RRI1;Q3UNK7;E9PXU2;Q9Z0F8-2;Q9Z0F8	Q3UEC0;Q3UV09;Q3UEW9;B7ZNJ0;B2RRI4;B2RRI1;Q3UNK7;E9PXU2;Q9Z0F8-2;Q9Z0F8	Disintegrin and metalloproteinase domain-containing protein 17	Adam17	tr|Q3UEC0|Q3UEC0_MOUSE Putative uncharacterized protein (Fragment) OS=Mus musculus GN=Adam17 PE=2 SV=1;tr|Q3UV09|Q3UV09_MOUSE Putative uncharacterized protein OS=Mus musculus GN=Adam17 PE=2 SV=1;tr|Q3UEW9|Q3UEW9_MOUSE A disintegrin and metallopeptidase dom	15030000	0	0	442050	442050	0	0	13547000	0	0	1	1	1	2	2	2	57.093	0.0020331	2.4108	15030000	1	1	0	0	1	0	0	1	0	0	1	0	0
632	B2RRI2;Q689Z5;Q689Z5-2;Q3TMM7;I6L981;A0JLU6;Q3UPW9;Q7TNB8-3;Q8R594	B2RRI2;Q689Z5;Q689Z5-2;Q3TMM7;I6L981	Protein strawberry notch homolog 1	Sbno1	tr|B2RRI2|B2RRI2_MOUSE Protein strawberry notch homolog 1 OS=Mus musculus GN=Sbno1 PE=2 SV=1;sp|Q689Z5|SBNO1_MOUSE Protein strawberry notch homolog 1 OS=Mus musculus GN=Sbno1 PE=1 SV=2;sp|Q689Z5-2|SBNO1_MOUSE Isoform 2 of Protein strawberry notch homolog 1	791740000	1599800000	1151500000	46620000	10418000	21050000	15152000	1176800000	1243100000	1284200000	31	31	25	33.4	33.4	28.3	153.92	0	76.24	3543100000	71	16	26	19	16	26	19	13	21	15	18	29	24
633	B2RRL2	B2RRL2	Jerky protein homolog-like	Jrkl	sp|B2RRL2|JERKL_MOUSE Jerky protein homolog-like OS=Mus musculus GN=Jrkl PE=2 SV=1	0	5003900	0	166800	0	166800	0	0	5921200	0	1	1	1	3.1	3.1	3.1	59.71	0.0092593	1.5771	5003900	1	0	1	0	0	1	0	0	1	0	0	1	0
634	B2RRM5;Q3V009;Q05DM6;Q3V009-2	B2RRM5;Q3V009;Q05DM6;Q3V009-2	Transmembrane emp24 domain-containing protein 1	Tmed1	tr|B2RRM5|B2RRM5_MOUSE Transmembrane emp24 domain containing 1 OS=Mus musculus GN=Tmed1 PE=2 SV=1;sp|Q3V009|TMED1_MOUSE Transmembrane emp24 domain-containing protein 1 OS=Mus musculus GN=Tmed1 PE=2 SV=1;tr|Q05DM6|Q05DM6_MOUSE Tmed1 protein OS=Mus musculus	428600000	390400000	247660000	177780000	71434000	65067000	41277000	345580000	423510000	321130000	3	3	3	18.5	18.5	18.5	25.262	0	10.827	1066700000	9	3	3	3	3	3	3	3	3	3	1	4	4
635	B2RRP1;Q99MS8	B2RRP1;Q99MS8	Tubulin polyglutamylase complex subunit 1	Tpgs1	tr|B2RRP1|B2RRP1_MOUSE Gene trap ROSA b-geo 22 OS=Mus musculus GN=Tpgs1 PE=2 SV=1;sp|Q99MS8|TPGS1_MOUSE Tubulin polyglutamylase complex subunit 1 OS=Mus musculus GN=Tpgs1 PE=1 SV=1	241580000	20985000	180230000	22140000	12079000	1049300	9011600	207770000	99706000	131770000	4	4	4	20.5	20.5	20.5	32.625	0	9.6433	442800000	8	2	3	4	2	3	4	2	3	4	2	3	3
636	Q925H0-2;B2RRQ1	Q925H0-2;B2RRQ1		Asic2	sp|Q925H0-2|ASIC2_MOUSE Isoform 2 of Acid-sensing ion channel 2 OS=Mus musculus GN=Asic2;tr|B2RRQ1|B2RRQ1_MOUSE Amiloride-sensitive cation channel 1, neuronal (Degenerin) OS=Mus musculus GN=Asic2 PE=2 SV=1	0	0	0	0	0	0	0	0	0	0	1	1	1	2.8	2.8	2.8	63.204	1	-2	0	0	1	0	0	1	0	0	1	0	0	0	0	0
637	B2RRR9;Q8BHC9	B2RRR9;Q8BHC9	Alpha-(1,3)-fucosyltransferase 11	Fut11	tr|B2RRR9|B2RRR9_MOUSE Fucosyltransferase 11 OS=Mus musculus GN=Fut11 PE=2 SV=1;sp|Q8BHC9|FUT11_MOUSE Alpha-(1,3)-fucosyltransferase 11 OS=Mus musculus GN=Fut11 PE=1 SV=1	304100000	341010000	378010000	35280000	10486000	11759000	13035000	325420000	383720000	329110000	13	13	13	38.4	38.4	38.4	55.532	0	27.642	1023100000	29	7	6	10	7	6	10	7	6	10	9	8	12
638	B2RRS4;E9PWV7;Q923K4;Q8C1M1;D6RDC6;Q923K4-2	B2RRS4;E9PWV7;Q923K4	tRNA modification GTPase GTPBP3, mitochondrial	Gtpbp3	tr|B2RRS4|B2RRS4_MOUSE GTP binding protein 3 OS=Mus musculus GN=Gtpbp3 PE=2 SV=1;tr|E9PWV7|E9PWV7_MOUSE tRNA modification GTPase GTPBP3, mitochondrial OS=Mus musculus GN=Gtpbp3 PE=3 SV=1;sp|Q923K4|GTPB3_MOUSE tRNA modification GTPase GTPBP3, mitochondrial	59141000	65812000	52423000	8062600	2688200	2991400	2382900	68069000	52555000	82611000	5	5	5	17.1	17.1	17.1	52.175	0	6.9893	177380000	7	2	3	3	2	3	3	2	3	3	2	2	3
639	D3Z4U0;B2RRT9;D3Z4T9;Q9R020;E9PUD0;Q9R020-2;V9GX51	D3Z4U0;B2RRT9;D3Z4T9;Q9R020;E9PUD0;Q9R020-2	Zinc finger Ran-binding domain-containing protein 2	Zranb2	tr|D3Z4U0|D3Z4U0_MOUSE Zinc finger Ran-binding domain-containing protein 2 OS=Mus musculus GN=Zranb2 PE=1 SV=1;tr|B2RRT9|B2RRT9_MOUSE Zinc finger Ran-binding domain-containing protein 2 OS=Mus musculus GN=Zranb2 PE=2 SV=1;tr|D3Z4T9|D3Z4T9_MOUSE Zinc finger	640380000	560540000	530260000	82437000	30494000	26692000	25250000	603960000	696330000	604740000	5	5	5	17.6	17.6	17.6	37.294	0	12.292	1731200000	17	5	4	4	5	4	4	5	4	4	6	5	6
640	B2RRW5;Q8CEF1	B2RRW5;Q8CEF1	Protein fem-1 homolog C	Fem1c	tr|B2RRW5|B2RRW5_MOUSE Fem-1 homolog c (C.elegans) OS=Mus musculus GN=Fem1c PE=2 SV=1;sp|Q8CEF1|FEM1C_MOUSE Protein fem-1 homolog C OS=Mus musculus GN=Fem1c PE=2 SV=1	59042000	44413000	25610000	3585100	1640000	1233700	711380	46918000	53704000	34041000	1	1	1	2.3	2.3	2.3	68.578	0.00084364	3.0856	129060000	3	1	1	1	1	1	1	1	1	1	2	0	1
641	Q3UAF7;Q3UAF6;Q3U5R4;B2RRX1;P60710;Q3UA89;Q3UAA9;Q3U939;Q3U804;Q3UGS0;Q61276;Q3TIJ9;Q3UCF8;E9Q1F2;G3UZ07;A1E281;E9Q606;Q99NC5;E9Q2D1;O89054;F8WGM8;Q6IWE2;F6WX90;Q7M0E4;Q8CF71;V9GXQ2;Q6GQT3;E9Q3M9	Q3UAF7;Q3UAF6;Q3U5R4;B2RRX1;P60710;Q3UA89;Q3UAA9;Q3U939;Q3U804;Q3UGS0;Q61276;Q3TIJ9;Q3UCF8;E9Q1F2;G3UZ07	Actin, cytoplasmic 1;Actin, cytoplasmic 1, N-terminally processed	Actb;Actg1	tr|Q3UAF7|Q3UAF7_MOUSE Putative uncharacterized protein OS=Mus musculus GN=Actb PE=2 SV=1;tr|Q3UAF6|Q3UAF6_MOUSE Putative uncharacterized protein OS=Mus musculus GN=Actb PE=2 SV=1;tr|Q3U5R4|Q3U5R4_MOUSE Putative uncharacterized protein OS=Mus musculus GN=A	0	0	0	0	0	0	0	0	0	0	26	2	0	72	4.8	0	41.75	0	95.099	0	0	24	25	24	2	2	2	0	0	0	0	0	0
642	B2RRY4;Q9JLB2	B2RRY4;Q9JLB2	MAGUK p55 subfamily member 5	Mpp5	tr|B2RRY4|B2RRY4_MOUSE Membrane protein, palmitoylated 5 (MAGUK p55 subfamily member 5) OS=Mus musculus GN=Mpp5 PE=2 SV=1;sp|Q9JLB2|MPP5_MOUSE MAGUK p55 subfamily member 5 OS=Mus musculus GN=Mpp5 PE=1 SV=1	224990000	82787000	68508000	9177600	5487500	2019200	1670900	196300000	64411000	124860000	7	7	7	14.8	14.8	14.8	77.229	0	12.556	376280000	9	5	4	2	5	4	2	5	4	2	4	2	3
643	B2RRZ7;Q3U0V2;I6L995;D6RCI0;D6RGL2	B2RRZ7;Q3U0V2	Tumor necrosis factor receptor type 1-associated DEATH domain protein	Tradd	tr|B2RRZ7|B2RRZ7_MOUSE TNFRSF1A-associated via death domain OS=Mus musculus GN=Tradd PE=2 SV=1;sp|Q3U0V2|TRADD_MOUSE Tumor necrosis factor receptor type 1-associated DEATH domain protein OS=Mus musculus GN=Tradd PE=1 SV=1	466700000	562410000	688370000	95416000	25928000	31245000	38243000	552160000	645060000	546510000	9	9	9	41.3	41.3	41.3	34.577	0	36.759	1717500000	31	7	7	9	7	7	9	7	7	9	10	12	9
644	B2RS09;Q7JJ13;Q7JJ13-2;U3KLT0;I7HPW1;G3UZR9;Q3TH63;S4R1Z1	B2RS09;Q7JJ13;Q7JJ13-2;U3KLT0;I7HPW1	Bromodomain-containing protein 2	Brd2	tr|B2RS09|B2RS09_MOUSE Bromodomain containing 2 OS=Mus musculus GN=Brd2 PE=2 SV=1;sp|Q7JJ13|BRD2_MOUSE Bromodomain-containing protein 2 OS=Mus musculus GN=Brd2 PE=1 SV=1;sp|Q7JJ13-2|BRD2_MOUSE Isoform 2 of Bromodomain-containing protein 2 OS=Mus musculus G	1314100000	1776300000	1468600000	123220000	35517000	48007000	39693000	1535400000	1355800000	1789900000	21	18	17	37	34.3	33.2	88.066	0	52.715	4559000000	50	13	17	12	10	14	11	9	13	10	17	17	16
645	Q8C4Y1;B2RS19;P28574	Q8C4Y1;B2RS19;P28574	Protein max	Max	tr|Q8C4Y1|Q8C4Y1_MOUSE Max protein OS=Mus musculus GN=Max PE=2 SV=1;tr|B2RS19|B2RS19_MOUSE Max protein OS=Mus musculus GN=Max PE=2 SV=1;sp|P28574|MAX_MOUSE Protein max OS=Mus musculus GN=Max PE=1 SV=1	237590000	223290000	205140000	66603000	23759000	22329000	20514000	230820000	224700000	178900000	2	2	2	20.5	20.5	20.5	17.171	0	7.6903	666030000	9	2	2	2	2	2	2	2	2	2	3	3	3
646	Q3TMB5;B2RS30;Q9Z1Y4	Q3TMB5;B2RS30;Q9Z1Y4	Thyroid receptor-interacting protein 6	Trip6	tr|Q3TMB5|Q3TMB5_MOUSE Putative uncharacterized protein OS=Mus musculus GN=Trip6 PE=2 SV=1;tr|B2RS30|B2RS30_MOUSE Thyroid hormone receptor interactor 6 OS=Mus musculus GN=Trip6 PE=2 SV=1;sp|Q9Z1Y4|TRIP6_MOUSE Thyroid receptor-interacting protein 6 OS=Mus m	645410000	1031200000	802090000	88526000	23050000	36829000	28646000	867630000	915620000	743230000	14	14	14	60.9	60.9	60.9	50.73	0	89.966	2478700000	39	9	13	10	9	13	10	9	13	10	9	16	14
647	B2RS41;Q8BWF0	B2RS41;Q8BWF0	Succinate-semialdehyde dehydrogenase, mitochondrial	Aldh5a1	tr|B2RS41|B2RS41_MOUSE Aldhehyde dehydrogenase family 5, subfamily A1 OS=Mus musculus GN=Aldh5a1 PE=2 SV=1;sp|Q8BWF0|SSDH_MOUSE Succinate-semialdehyde dehydrogenase, mitochondrial OS=Mus musculus GN=Aldh5a1 PE=1 SV=1	1107200000	1528000000	1130000000	117660000	34600000	47751000	35313000	1284900000	1360300000	1336500000	15	15	15	37.5	37.5	37.5	55.968	0	42.588	3765300000	41	9	12	13	9	12	13	9	12	13	12	14	15
648	B2RS43;Q9Z1R4	B2RS43;Q9Z1R4	Uncharacterized protein C6orf47 homolog	D17H6S53E;D17h6s53e	tr|B2RS43|B2RS43_MOUSE DNA segment, Chr 17, human D6S53E OS=Mus musculus GN=D17H6S53E PE=2 SV=1;sp|Q9Z1R4|CF047_MOUSE Uncharacterized protein C6orf47 homolog OS=Mus musculus GN=D17h6s53e PE=2 SV=1	200180000	210010000	220160000	52530000	16682000	17501000	18347000	187090000	260270000	264610000	3	3	3	12.3	12.3	12.3	32.014	0	7.6283	630360000	9	3	3	3	3	3	3	3	3	3	3	3	3
649	Q3TME3;B2RS80;Q9QYC7	Q3TME3;B2RS80;Q9QYC7	Vitamin K-dependent gamma-carboxylase	Ggcx	tr|Q3TME3|Q3TME3_MOUSE Putative uncharacterized protein OS=Mus musculus GN=Ggcx PE=2 SV=1;tr|B2RS80|B2RS80_MOUSE Gamma-glutamyl carboxylase OS=Mus musculus GN=Ggcx PE=2 SV=1;sp|Q9QYC7|VKGC_MOUSE Vitamin K-dependent gamma-carboxylase OS=Mus musculus GN=Ggcx	92756000	0	83968000	5522600	2898600	0	2624000	101800000	0	78816000	3	3	3	4.6	4.6	4.6	87.222	0	7.4467	176720000	6	2	0	2	2	0	2	2	0	2	3	0	3
650	B2RS85;Q9QXV8	B2RS85;Q9QXV8	Protein sprouty homolog 2	Spry2	tr|B2RS85|B2RS85_MOUSE Sprouty homolog 2 (Drosophila) OS=Mus musculus GN=Spry2 PE=2 SV=1;sp|Q9QXV8|SPY2_MOUSE Protein sprouty homolog 2 OS=Mus musculus GN=Spry2 PE=2 SV=1	118720000	165530000	93952000	18910000	5936000	8276500	4697600	190120000	89653000	147150000	4	4	4	18.4	18.4	18.4	34.623	0	11.551	378200000	7	2	4	2	2	4	2	2	4	2	1	4	2
651	B2RS91	B2RS91	RNA polymerase I-specific transcription initiation factor RRN3	Rrn3	sp|B2RS91|RRN3_MOUSE RNA polymerase I-specific transcription initiation factor RRN3 OS=Mus musculus GN=Rrn3 PE=1 SV=1	39828000	102340000	48234000	4760000	995710	2558400	1205800	58413000	67659000	66833000	7	7	7	13.9	13.9	13.9	74.517	0	7.3758	190400000	13	4	5	4	4	5	4	4	5	4	5	4	4
652	B2RSC8;P46935;Q3TUU1;Q3V335;V9GWV8;A0JNZ0;Q8BNU7;V9GXS6	B2RSC8;P46935	E3 ubiquitin-protein ligase NEDD4	Nedd4	tr|B2RSC8|B2RSC8_MOUSE E3 ubiquitin-protein ligase OS=Mus musculus GN=Nedd4 PE=2 SV=1;sp|P46935|NEDD4_MOUSE E3 ubiquitin-protein ligase NEDD4 OS=Mus musculus GN=Nedd4 PE=1 SV=3	17213000000	17038000000	13773000000	1044000000	374200000	370380000	299400000	14162000000	16350000000	17514000000	43	38	32	59.4	53.3	46.8	102.71	0	249.63	48024000000	183	36	37	38	31	32	33	25	27	28	62	58	63
653	E9Q4A5;B2RSE6;Q3TL26	E9Q4A5;B2RSE6;Q3TL26	Dimethyladenosine transferase 2, mitochondrial	Gm1818;Tfb2m	tr|E9Q4A5|E9Q4A5_MOUSE Protein Gm1818 OS=Mus musculus GN=Gm1818 PE=4 SV=1;tr|B2RSE6|B2RSE6_MOUSE Transcription factor B2, mitochondrial OS=Mus musculus GN=Tfb2m PE=2 SV=1;sp|Q3TL26|TFB2M_MOUSE Dimethyladenosine transferase 2, mitochondrial OS=Mus musculus	153080000	106140000	84598000	13224000	5887800	4082300	3253800	113380000	118900000	129810000	4	4	4	15.9	15.9	15.9	45.862	0	12.93	343820000	9	4	3	2	4	3	2	4	3	2	4	3	2
654	B7ZNV0;B2RSG2;O35980	B7ZNV0;B2RSG2;O35980	Endonuclease III-like protein 1	Nthl1	tr|B7ZNV0|B7ZNV0_MOUSE Nthl1 protein (Fragment) OS=Mus musculus GN=Nthl1 PE=2 SV=1;tr|B2RSG2|B2RSG2_MOUSE Nth (Endonuclease III)-like 1 (E.coli) OS=Mus musculus GN=Nthl1 PE=2 SV=1;sp|O35980|NTH_MOUSE Endonuclease III-like protein 1 OS=Mus musculus GN=Nthl1	0	33678000	0	2104900	0	2104900	0	0	39852000	0	1	1	1	7.5	7.5	7.5	31.603	0.0015164	2.6743	33678000	1	0	1	0	0	1	0	0	1	0	0	1	0
655	B2RSN3;Q9CWF2;Q99J49;G3UZR1;Q62363	B2RSN3;Q9CWF2;Q99J49	Tubulin beta-2B chain	Tubb2b;Tubb2a	tr|B2RSN3|B2RSN3_MOUSE MCG1395 OS=Mus musculus GN=Tubb2b PE=2 SV=1;sp|Q9CWF2|TBB2B_MOUSE Tubulin beta-2B chain OS=Mus musculus GN=Tubb2b PE=1 SV=1;tr|Q99J49|Q99J49_MOUSE Tubb2a protein (Fragment) OS=Mus musculus GN=Tubb2a PE=2 SV=1	16138000000	15495000000	11145000000	1944500000	733540000	704320000	506600000	16014000000	15596000000	11504000000	28	7	1	78.7	24.3	2.7	49.953	0	83.124	42778000000	113	26	28	26	7	7	6	1	1	1	40	34	39
656	B7ZNW3;B2RSR2;Q8BH47	B7ZNW3;B2RSR2;Q8BH47	Vesicle-trafficking protein SEC22a	Sec22a	tr|B7ZNW3|B7ZNW3_MOUSE Sec22a protein OS=Mus musculus GN=Sec22a PE=2 SV=1;tr|B2RSR2|B2RSR2_MOUSE SEC22 vesicle trafficking protein homologe A (S. cerevisiae) OS=Mus musculus GN=Sec22a PE=2 SV=1;sp|Q8BH47|SC22A_MOUSE Vesicle-trafficking protein SEC22a OS=Mu	154850000	129310000	107750000	27994000	11061000	9236500	7696100	149050000	127970000	111140000	6	6	6	30.9	30.9	30.9	32.618	0	19.929	391910000	8	3	5	3	3	5	3	3	5	3	3	2	3
657	B2RSR7;Q3ULJ0;Q3ULJ0-2;D3Z0L6;E0CXN5;P13707	B2RSR7;Q3ULJ0;Q3ULJ0-2	Glycerol-3-phosphate dehydrogenase [NAD(+)];Glycerol-3-phosphate dehydrogenase 1-like protein	Gpd1l	tr|B2RSR7|B2RSR7_MOUSE Glycerol-3-phosphate dehydrogenase 1-like OS=Mus musculus GN=Gpd1l PE=2 SV=1;sp|Q3ULJ0|GPD1L_MOUSE Glycerol-3-phosphate dehydrogenase 1-like protein OS=Mus musculus GN=Gpd1l PE=1 SV=2;sp|Q3ULJ0-2|GPD1L_MOUSE Isoform 2 of Glycerol-3-p	725890000	956760000	727020000	92680000	27919000	36799000	27962000	835800000	866840000	750190000	14	14	14	46.2	46.2	46.2	38.225	0	38.206	2409700000	33	9	11	8	9	11	8	9	11	8	11	11	11
658	B2RSU4;Q80V62;Q3U202;Q3UQJ0;Q3TLN3;F7CAP1;Q80V62-2	B2RSU4;Q80V62;Q3U202;Q3UQJ0;Q3TLN3	Fanconi anemia group D2 protein homolog	Fancd2	tr|B2RSU4|B2RSU4_MOUSE Fanconi anemia, complementation group D2 OS=Mus musculus GN=Fancd2 PE=2 SV=1;sp|Q80V62|FACD2_MOUSE Fanconi anemia group D2 protein homolog OS=Mus musculus GN=Fancd2 PE=1 SV=2;tr|Q3U202|Q3U202_MOUSE Putative uncharacterized protein (F	649180000	873320000	804890000	29460000	8217400	11055000	10188000	834780000	832240000	785220000	24	24	24	24.4	24.4	24.4	163.62	0	60.511	2327400000	66	15	20	20	15	20	20	15	20	20	19	23	24
659	E9PY46;B2RSU5;Q2XQY6;Q6ZQ91;E9Q682;Q3TQ94;Q6RUU2;Q3TA81;Q91VU5;E9Q925	E9PY46;B2RSU5;Q2XQY6;Q6ZQ91;E9Q682;Q3TQ94;Q6RUU2;Q3TA81		Ift140	tr|E9PY46|E9PY46_MOUSE Protein Ift140 OS=Mus musculus GN=Ift140 PE=4 SV=1;tr|B2RSU5|B2RSU5_MOUSE Intraflagellar transport 140 homolog (Chlamydomonas) OS=Mus musculus GN=Ift140 PE=2 SV=1;tr|Q2XQY6|Q2XQY6_MOUSE Intraflagellar transport protein 140 OS=Mus mus	260580000	410960000	391190000	12215000	2995200	4723700	4496500	291880000	426770000	359360000	21	21	21	18.6	18.6	18.6	165.87	0	47.332	1062700000	33	8	13	13	8	13	13	8	13	13	8	13	12
660	E9PWI6;B2RSU7;Q8CHG3;E0CYI9;Q3UFV3;Q6P0A4;E0CY89	E9PWI6;B2RSU7;Q8CHG3;E0CYI9	GRIP and coiled-coil domain-containing protein 2	Gcc2	tr|E9PWI6|E9PWI6_MOUSE GRIP and coiled-coil domain-containing protein 2 OS=Mus musculus GN=Gcc2 PE=4 SV=1;tr|B2RSU7|B2RSU7_MOUSE GRIP and coiled-coil domain containing 2 OS=Mus musculus GN=Gcc2 PE=2 SV=1;sp|Q8CHG3|GCC2_MOUSE GRIP and coiled-coil domain-con	613610000	1777400000	623630000	24117000	4908900	14219000	4989000	991510000	1088500000	1009700000	28	28	28	22.4	22.4	22.4	190.73	0	76.679	3014600000	57	16	21	18	16	21	18	16	21	18	16	22	19
661	B2RSV4;Q921M3;Q921M3-2	B2RSV4;Q921M3;Q921M3-2	Splicing factor 3B subunit 3	Sf3b3	tr|B2RSV4|B2RSV4_MOUSE Splicing factor 3b, subunit 3 OS=Mus musculus GN=Sf3b3 PE=2 SV=1;sp|Q921M3|SF3B3_MOUSE Splicing factor 3B subunit 3 OS=Mus musculus GN=Sf3b3 PE=2 SV=1;sp|Q921M3-2|SF3B3_MOUSE Isoform 2 of Splicing factor 3B subunit 3 OS=Mus musculus	22272000000	18093000000	17544000000	965150000	371200000	301560000	292400000	19676000000	21989000000	20244000000	46	46	46	53.6	53.6	53.6	135.55	0	323.31	57909000000	240	43	43	43	43	43	43	43	43	43	86	73	81
662	B2RSV7;Q69ZL1;Q69ZL1-2	B2RSV7;Q69ZL1;Q69ZL1-2	FYVE, RhoGEF and PH domain-containing protein 6	Fgd6	tr|B2RSV7|B2RSV7_MOUSE Fgd6 protein OS=Mus musculus GN=Fgd6 PE=2 SV=1;sp|Q69ZL1|FGD6_MOUSE FYVE, RhoGEF and PH domain-containing protein 6 OS=Mus musculus GN=Fgd6 PE=1 SV=2;sp|Q69ZL1-2|FGD6_MOUSE Isoform 2 of FYVE, RhoGEF and PH domain-containing protein 6	8038000	12880000	17993000	405310	83729	134160	187420	14188000	11805000	22059000	2	2	2	1.1	1.1	1.1	154.95	0.0091401	1.5889	38910000	5	1	2	2	1	2	2	1	2	2	1	2	2
663	B2RSW8;Q9R0L6;Q9R0L6-2	B2RSW8;Q9R0L6;Q9R0L6-2	Pericentriolar material 1 protein	Pcm1	tr|B2RSW8|B2RSW8_MOUSE Pericentriolar material 1 OS=Mus musculus GN=Pcm1 PE=2 SV=1;sp|Q9R0L6|PCM1_MOUSE Pericentriolar material 1 protein OS=Mus musculus GN=Pcm1 PE=1 SV=2;sp|Q9R0L6-2|PCM1_MOUSE Isoform 2 of Pericentriolar material 1 protein OS=Mus musculu	2319500000	2756900000	2202200000	70666000	22520000	26766000	21380000	2539400000	2621500000	2581000000	40	40	40	27.4	27.4	27.4	228.83	0	150.23	7278600000	111	29	31	29	29	31	29	29	31	29	40	35	36
664	Q76K67;Q6XL48;B2RT14	Q76K67;Q6XL48;B2RT14		Ugt1a5	tr|Q76K67|Q76K67_MOUSE Putative uncharacterized protein LE137 OS=Mus musculus GN=Ugt1a5 PE=2 SV=1;tr|Q6XL48|Q6XL48_MOUSE UDP glycosyltransferase 1 family polypeptide A5 OS=Mus musculus GN=Ugt1a5 PE=2 SV=1;tr|B2RT14|B2RT14_MOUSE MCG14318, isoform CRA_h OS=M	0	30526000	0	1090200	0	1090200	0	0	26423000	0	6	1	1	16	2.1	2.1	59.615	1	-2	30526000	1	5	6	3	0	1	0	0	1	0	0	1	0
665	B2RT41;Q6A049;Q6P7T8;Q8K082;Q3TTC3	B2RT41;Q6A049;Q6P7T8		Zfc3h1	tr|B2RT41|B2RT41_MOUSE Protein Zfc3h1 OS=Mus musculus GN=Zfc3h1 PE=2 SV=1;tr|Q6A049|Q6A049_MOUSE MKIAA0546 protein (Fragment) OS=Mus musculus GN=Zfc3h1 PE=2 SV=1;tr|Q6P7T8|Q6P7T8_MOUSE Zfc3h1 protein (Fragment) OS=Mus musculus GN=Zfc3h1 PE=2 SV=1	338830000	262060000	176270000	7196000	3137300	2426500	1632100	233840000	229140000	293110000	14	14	14	9.4	9.4	9.4	225.05	0	20.715	777160000	22	4	12	6	4	12	6	4	12	6	5	12	5
666	B2RT77;Q78WZ7	B2RT77;Q78WZ7	DNA-directed RNA polymerase I subunit RPA43	Twistnb	tr|B2RT77|B2RT77_MOUSE TWIST neighbor OS=Mus musculus GN=Twistnb PE=2 SV=1;sp|Q78WZ7|RPA43_MOUSE DNA-directed RNA polymerase I subunit RPA43 OS=Mus musculus GN=Twistnb PE=1 SV=1	307070000	507530000	557230000	97987000	21933000	36252000	39802000	612840000	407310000	494200000	5	5	5	26.4	26.4	26.4	36.721	0	38.229	1371800000	12	3	4	4	3	4	4	3	4	4	3	4	5
667	B2RT97;Q9WVJ2;E9Q5I9;E9Q0U1;F6ZQQ3;F6PXS6;E9PY93	B2RT97;Q9WVJ2;E9Q5I9	26S proteasome non-ATPase regulatory subunit 13	Psmd13	tr|B2RT97|B2RT97_MOUSE Proteasome (Prosome, macropain) 26S subunit, non-ATPase, 13 OS=Mus musculus GN=Psmd13 PE=2 SV=1;sp|Q9WVJ2|PSD13_MOUSE 26S proteasome non-ATPase regulatory subunit 13 OS=Mus musculus GN=Psmd13 PE=1 SV=1;tr|E9Q5I9|E9Q5I9_MOUSE 26S prot	15753000000	13963000000	11969000000	1603200000	605880000	537040000	460330000	14069000000	13961000000	13951000000	24	24	24	69.1	69.1	69.1	42.809	0	200.48	41684000000	133	23	21	21	23	21	21	23	21	21	50	44	39
668	B2RTB0;Q3UHX2;Q1WWJ8	B2RTB0;Q3UHX2;Q1WWJ8	28 kDa heat- and acid-stable phosphoprotein	Pdap1	tr|B2RTB0|B2RTB0_MOUSE MCG17262 OS=Mus musculus GN=Pdap1 PE=2 SV=1;sp|Q3UHX2|HAP28_MOUSE 28 kDa heat- and acid-stable phosphoprotein OS=Mus musculus GN=Pdap1 PE=1 SV=1;tr|Q1WWJ8|Q1WWJ8_MOUSE Pdap1 protein (Fragment) OS=Mus musculus GN=Pdap1 PE=2 SV=1	4174600000	4164000000	4675700000	1446000000	463840000	462670000	519530000	3869500000	4267100000	4268500000	10	10	10	39.2	39.2	39.2	20.605	0	70.699	13014000000	66	10	9	9	10	9	9	10	9	9	24	22	20
669	B2RTC8;Q3V132	B2RTC8;Q3V132	ADP/ATP translocase 4;ADP/ATP translocase 4, N-terminally processed	Slc25a31	tr|B2RTC8|B2RTC8_MOUSE Solute carrier family 25 (Mitochondrial carrier adenine nucleotide translocator), member 31 OS=Mus musculus GN=Slc25a31 PE=2 SV=1;sp|Q3V132|ADT4_MOUSE ADP/ATP translocase 4 OS=Mus musculus GN=Slc25a31 PE=2 SV=1	80413000	59646000	43367000	7975100	3496200	2593300	1885500	92444000	64759000	43525000	4	1	1	11.6	2.8	2.8	35.257	0.0041109	2.0251	183430000	5	4	4	4	1	1	1	1	1	1	2	1	2
670	B2RTE3;Q4FK66;Q4FK66-2	B2RTE3;Q4FK66	Pre-mRNA-splicing factor 38A	Prpf38a	tr|B2RTE3|B2RTE3_MOUSE MCG17981 OS=Mus musculus GN=Prpf38a PE=2 SV=1;sp|Q4FK66|PR38A_MOUSE Pre-mRNA-splicing factor 38A OS=Mus musculus GN=Prpf38a PE=1 SV=1	1853400000	1774300000	1444400000	338140000	123560000	118280000	96295000	1643900000	1802800000	1644200000	11	11	11	28.5	28.5	28.5	37.436	0	34.994	5072100000	38	8	10	9	8	10	9	8	10	9	13	12	13
671	J3QQ10;B2RTG9;Q9D011	J3QQ10;B2RTG9;Q9D011	M-phase-specific PLK1-interacting protein	Gm7102;Mplkip	tr|J3QQ10|J3QQ10_MOUSE Protein Gm7102 OS=Mus musculus GN=Gm7102 PE=4 SV=1;tr|B2RTG9|B2RTG9_MOUSE RIKEN cDNA 2810021B07 OS=Mus musculus GN=Mplkip PE=2 SV=1;sp|Q9D011|MPLKI_MOUSE M-phase-specific PLK1-interacting protein OS=Mus musculus GN=Mplkip PE=2 SV=1	12669000	36130000	25711000	9313700	1583600	4516200	3213900	16284000	37209000	25385000	1	1	1	14	14	14	19.539	0	10.015	74510000	3	1	1	1	1	1	1	1	1	1	1	1	1
672	Q3UEU2;B2RTJ8;O35710-2;O35710	Q3UEU2;B2RTJ8;O35710-2;O35710	Nocturnin	Ccrn4l	tr|Q3UEU2|Q3UEU2_MOUSE Putative uncharacterized protein OS=Mus musculus GN=Ccrn4l PE=2 SV=1;tr|B2RTJ8|B2RTJ8_MOUSE CCR4 carbon catabolite repression 4-like (S. cerevisiae) OS=Mus musculus GN=Ccrn4l PE=2 SV=1;sp|O35710-2|NOCT_MOUSE Isoform 2 of Nocturnin OS	452800000	549190000	444040000	49863000	15614000	18938000	15312000	404680000	537490000	527390000	12	12	11	37.3	37.3	35.9	48.27	0	35.963	1446000000	30	9	7	8	9	7	8	8	6	7	12	9	9
673	B2RTM0;P62806;Q6B822	B2RTM0;P62806	Histone H4	Hist2h4;Hist1h4a	tr|B2RTM0|B2RTM0_MOUSE Histone H4 OS=Mus musculus GN=Hist2h4 PE=2 SV=1;sp|P62806|H4_MOUSE Histone H4 OS=Mus musculus GN=Hist1h4a PE=1 SV=2	343330000000	299430000000	274350000000	152850000000	57221000000	49904000000	45726000000	278930000000	246040000000	282440000000	14	14	6	61.2	61.2	29.1	11.367	0	121.13	917110000000	914	12	12	14	12	12	14	6	5	6	312	284	318
674	B2RTM1;Q6F5E0	B2RTM1;Q6F5E0	Transmembrane protein 158	Tmem158	tr|B2RTM1|B2RTM1_MOUSE Transmembrane protein 158 OS=Mus musculus GN=Tmem158 PE=2 SV=1;sp|Q6F5E0|TM158_MOUSE Transmembrane protein 158 OS=Mus musculus GN=Tmem158 PE=1 SV=1	12578000	5773700	9445100	3088500	1397500	641530	1049500	13888000	9184900	10787000	1	1	1	14.7	14.7	14.7	29.128	0.0043455	1.9139	27797000	5	1	1	1	1	1	1	1	1	1	2	1	2
675	B2RTN5;Q91YM2;Q3TSU7;Q3UVZ8;Q5U612	B2RTN5;Q91YM2;Q3TSU7	Rho GTPase-activating protein 35	Arhgap35	tr|B2RTN5|B2RTN5_MOUSE Glucocorticoid receptor DNA binding factor 1 OS=Mus musculus GN=Arhgap35 PE=2 SV=1;sp|Q91YM2|RHG35_MOUSE Rho GTPase-activating protein 35 OS=Mus musculus GN=Arhgap35 PE=1 SV=3;tr|Q3TSU7|Q3TSU7_MOUSE Putative uncharacterized protein (	755950000	1278900000	806070000	31566000	8399500	14210000	8956400	1038200000	879230000	1065200000	26	26	26	25	25	25	170.39	0	79.602	2840900000	59	16	23	17	16	23	17	16	23	17	16	25	18
676	B2RU91;Q8BUY9;Q05BF8	B2RU91;Q8BUY9;Q05BF8	Geranylgeranyl transferase type-1 subunit beta	Pggt1b	tr|B2RU91|B2RU91_MOUSE Protein geranylgeranyltransferase type I, beta subunit OS=Mus musculus GN=Pggt1b PE=2 SV=1;sp|Q8BUY9|PGTB1_MOUSE Geranylgeranyl transferase type-1 subunit beta OS=Mus musculus GN=Pggt1b PE=2 SV=1;tr|Q05BF8|Q05BF8_MOUSE Pggt1b protein	104700000	167180000	166700000	20885000	4985900	7961100	7937900	151330000	157580000	198790000	4	4	4	14.1	14.1	14.1	42.324	0	9.1886	438580000	16	3	4	4	3	4	4	3	4	4	4	7	5
677	B2RUA5;Q7TSI3;Q8BNQ1	B2RUA5;Q7TSI3	Serine/threonine-protein phosphatase 6 regulatory subunit 1	Ppp6r1	tr|B2RUA5|B2RUA5_MOUSE SAPS domain family, member 1 OS=Mus musculus GN=Ppp6r1 PE=2 SV=1;sp|Q7TSI3|PP6R1_MOUSE Serine/threonine-protein phosphatase 6 regulatory subunit 1 OS=Mus musculus GN=Ppp6r1 PE=1 SV=1	387400000	479320000	293060000	33137000	11068000	13695000	8373300	297300000	558010000	395720000	12	12	12	23	23	23	94.555	0	40.622	1159800000	26	7	8	7	7	8	7	7	8	7	10	9	7
678	B2RUC7;Q9Z1Z2	B2RUC7;Q9Z1Z2	Serine-threonine kinase receptor-associated protein	Strap	tr|B2RUC7|B2RUC7_MOUSE Serine/threonine kinase receptor associated protein OS=Mus musculus GN=Strap PE=2 SV=1;sp|Q9Z1Z2|STRAP_MOUSE Serine-threonine kinase receptor-associated protein OS=Mus musculus GN=Strap PE=1 SV=2	9055700000	7726000000	8023000000	1033500000	377320000	321920000	334290000	9842100000	7629700000	7675900000	19	19	19	72	72	72	38.442	0	163.17	24805000000	124	16	19	18	16	19	18	16	19	18	42	39	43
679	B2RUD1;D3YV67	B2RUD1		Tmem165	tr|B2RUD1|B2RUD1_MOUSE Transmembrane protein 165 OS=Mus musculus GN=Tmem165 PE=2 SV=1	0	0	0	0	0	0	0	0	0	0	6	1	1	30.7	7.7	7.7	34.806	0.00015924	6.0865	0	0	4	5	4	0	1	0	0	1	0	0	0	0
680	B2RUE3;Q6EJB6;E9Q9S3	B2RUE3;Q6EJB6;E9Q9S3	U3 small nucleolar RNA-associated protein 14 homolog B	Utp14b	tr|B2RUE3|B2RUE3_MOUSE UTP14, U3 small nucleolar ribonucleoprotein, homolog B (Yeast) OS=Mus musculus GN=Utp14b PE=2 SV=1;sp|Q6EJB6|UT14B_MOUSE U3 small nucleolar RNA-associated protein 14 homolog B OS=Mus musculus GN=Utp14b PE=2 SV=2;tr|E9Q9S3|E9Q9S3_MOUS	12657000	0	14740000	608840	281280	0	327570	15749000	0	12664000	4	1	1	6.9	2.6	2.6	88.638	0.0043559	1.952	27398000	2	3	2	2	1	0	1	1	0	1	1	0	1
681	B2RUE8;Q6ZQ68;F8VPL5;B7ZNR9;E9PVG7;B7ZNR8;P97820;Q571L1;Q61155;Q3UTY9	B2RUE8;Q6ZQ68;F8VPL5;B7ZNR9;E9PVG7;B7ZNR8;P97820	Mitogen-activated protein kinase kinase kinase kinase 4	Map4k4;mKIAA0687	tr|B2RUE8|B2RUE8_MOUSE Map4k4 protein OS=Mus musculus GN=Map4k4 PE=2 SV=1;tr|Q6ZQ68|Q6ZQ68_MOUSE MKIAA0687 protein (Fragment) OS=Mus musculus GN=mKIAA0687 PE=4 SV=1;tr|F8VPL5|F8VPL5_MOUSE Mitogen-activated protein kinase kinase kinase kinase 4 OS=Mus muscu	390520000	236200000	354290000	15328000	6101900	3690600	5535700	313060000	361500000	349390000	14	10	9	18.2	14.7	14.7	139.06	0	40.484	981010000	24	11	9	11	7	6	8	7	6	7	8	7	9
682	B2RUG4;Q61602;B7ZNV2;Q3TYX7;Q3UMJ8	B2RUG4;Q61602;B7ZNV2	Transcriptional activator GLI3;Transcriptional repressor GLI3R	Gli3	tr|B2RUG4|B2RUG4_MOUSE GLI-Kruppel family member GLI3 OS=Mus musculus GN=Gli3 PE=2 SV=1;sp|Q61602|GLI3_MOUSE Transcriptional activator GLI3 OS=Mus musculus GN=Gli3 PE=1 SV=2;tr|B7ZNV2|B7ZNV2_MOUSE GLI-Kruppel family member GLI3 OS=Mus musculus GN=Gli3 PE=2	54438000	89292000	97990000	3607800	812510	1332700	1462500	65578000	95735000	100760000	8	8	8	9.9	9.9	9.9	171.65	0	15.274	241720000	13	3	3	5	3	3	5	3	3	5	4	3	6
683	B2RUG7;O88532;F6QJP7;F6V459;D3Z5G4;D3Z7V6;F6RTK9	B2RUG7;O88532	Zinc finger RNA-binding protein	Zfr	tr|B2RUG7|B2RUG7_MOUSE Zinc finger RNA binding protein OS=Mus musculus GN=Zfr PE=2 SV=1;sp|O88532|ZFR_MOUSE Zinc finger RNA-binding protein OS=Mus musculus GN=Zfr PE=1 SV=2	6662700000	5188300000	5223600000	348460000	135970000	105880000	106600000	6138100000	5559700000	5624200000	35	35	35	51	51	51	114.45	0	286.72	17075000000	164	32	27	32	32	27	32	32	27	32	62	46	56
684	D6RI62;Q8BJR0;B2RUG8;D3Z112;F6WV21;D6REV1;Q8BZ32	D6RI62;Q8BJR0;B2RUG8;D3Z112;F6WV21;D6REV1;Q8BZ32	Putative Polycomb group protein ASXL2	Asxl2	tr|D6RI62|D6RI62_MOUSE Putative Polycomb group protein ASXL2 (Fragment) OS=Mus musculus GN=Asxl2 PE=4 SV=2;tr|Q8BJR0|Q8BJR0_MOUSE Putative uncharacterized protein (Fragment) OS=Mus musculus GN=Asxl2 PE=2 SV=2;tr|B2RUG8|B2RUG8_MOUSE Asxl2 protein OS=Mus mus	34849000	52237000	65275000	6925500	1584000	2374400	2967100	78878000	41967000	68676000	3	3	3	7.4	7.4	7.4	44.702	0.00028914	3.6545	152360000	7	1	2	3	1	2	3	1	2	3	1	3	3
685	Q3UQT2;E9QLQ9;B2RUG9;Q61315-4;Q61315-3;Q61315-2;Q61315	Q3UQT2;E9QLQ9;B2RUG9;Q61315-4;Q61315-3;Q61315-2;Q61315	Adenomatous polyposis coli protein	Apc	tr|Q3UQT2|Q3UQT2_MOUSE Putative uncharacterized protein (Fragment) OS=Mus musculus GN=Apc PE=2 SV=1;tr|E9QLQ9|E9QLQ9_MOUSE Adenomatous polyposis coli protein OS=Mus musculus GN=Apc PE=4 SV=1;tr|B2RUG9|B2RUG9_MOUSE Adenomatosis polyposis coli OS=Mus musculu	0	12940000	14818000	1461000	0	681080	779890	0	12403000	13151000	1	1	1	4.7	4.7	4.7	37.393	0.0016414	2.5568	27758000	2	0	1	1	0	1	1	0	1	1	0	1	1
686	B2RUJ4;Z4YKQ9;Q4QY64;Q4QY64-2	B2RUJ4;Z4YKQ9;Q4QY64;Q4QY64-2	ATPase family AAA domain-containing protein 5	Atad5	tr|B2RUJ4|B2RUJ4_MOUSE Atad5 protein OS=Mus musculus GN=Atad5 PE=2 SV=1;tr|Z4YKQ9|Z4YKQ9_MOUSE ATPase family AAA domain-containing protein 5 OS=Mus musculus GN=Atad5 PE=4 SV=1;sp|Q4QY64|ATAD5_MOUSE ATPase family AAA domain-containing protein 5 OS=Mus muscu	1949400000	2116700000	2670600000	64159000	18566000	20159000	25434000	2609100000	2376900000	1848100000	12	12	12	8.2	8.2	8.2	197.98	0	10.569	6736700000	18	7	6	8	7	6	8	7	6	8	6	5	7
687	B2RUK2;Q80TH2-1;Q80TH2;Q80TH2-2;B7ZNY4;B7ZNX6;B2RUJ2	B2RUK2;Q80TH2-1;Q80TH2;Q80TH2-2;B7ZNY4;B7ZNX6;B2RUJ2	Protein LAP2	Erbb2ip	tr|B2RUK2|B2RUK2_MOUSE Erbb2 interacting protein OS=Mus musculus GN=Erbb2ip PE=2 SV=1;sp|Q80TH2-1|LAP2_MOUSE Isoform 1 of Protein LAP2 OS=Mus musculus GN=Erbb2ip;sp|Q80TH2|LAP2_MOUSE Protein LAP2 OS=Mus musculus GN=Erbb2ip PE=1 SV=3;sp|Q80TH2-2|LAP2_MOUSE	2615500000	2461700000	2108400000	76443000	27825000	26189000	22430000	2572200000	2585300000	2460900000	43	43	41	44.6	44.6	42.9	162.18	0	175.15	7185700000	134	35	34	32	35	34	32	33	32	30	46	43	45
688	B2RUK5;Q3ULD5;Q8K1L7;Q6PD20;Q9D2F6	B2RUK5;Q3ULD5	Methylcrotonoyl-CoA carboxylase beta chain, mitochondrial	Mccc2	tr|B2RUK5|B2RUK5_MOUSE Methylcrotonoyl-Coenzyme A carboxylase 2 (Beta) OS=Mus musculus GN=Mccc2 PE=2 SV=1;sp|Q3ULD5|MCCB_MOUSE Methylcrotonoyl-CoA carboxylase beta chain, mitochondrial OS=Mus musculus GN=Mccc2 PE=1 SV=1	1327700000	1461500000	1276100000	127040000	41492000	45672000	39877000	1403700000	1280400000	1475800000	18	18	18	45.3	45.3	45.3	61.378	0	76.517	4065300000	55	13	17	12	13	17	12	13	17	12	20	18	17
689	Q8BLY6;B2RUK7;Q8BWC0	Q8BLY6;B2RUK7;Q8BWC0	Two pore calcium channel protein 2	Tpcn2	tr|Q8BLY6|Q8BLY6_MOUSE Putative uncharacterized protein (Fragment) OS=Mus musculus GN=Tpcn2 PE=2 SV=1;tr|B2RUK7|B2RUK7_MOUSE Two pore segment channel 2 OS=Mus musculus GN=Tpcn2 PE=2 SV=1;sp|Q8BWC0|TPC2_MOUSE Two pore calcium channel protein 2 OS=Mus muscul	56409000	10551000	37597000	5808700	3133800	586160	2088700	66111000	0	53348000	2	2	2	11.5	11.5	11.5	52.141	0.00028977	3.6967	104560000	3	1	1	1	1	1	1	1	1	1	1	1	1
690	B2RUM8;Q8K363;Q9CSG7;F6ZX28;Q9CSJ2	B2RUM8;Q8K363	ATP-dependent RNA helicase DDX18	Ddx18	tr|B2RUM8|B2RUM8_MOUSE DEAD (Asp-Glu-Ala-Asp) box polypeptide 18 OS=Mus musculus GN=Ddx18 PE=2 SV=1;sp|Q8K363|DDX18_MOUSE ATP-dependent RNA helicase DDX18 OS=Mus musculus GN=Ddx18 PE=2 SV=1	4126800000	4002400000	3610200000	308930000	108600000	105330000	95005000	3884700000	4144400000	4255200000	31	31	31	61.1	61.1	61.1	74.18	0	120.58	11739000000	95	22	29	26	22	29	26	22	29	26	29	30	36
691	B2RUP0;Q8C5L7;Q8C545;Q571D9	B2RUP0;Q8C5L7;Q8C545	RNA-binding protein 34	Rbm34	tr|B2RUP0|B2RUP0_MOUSE RNA binding motif protein 34 OS=Mus musculus GN=Rbm34 PE=1 SV=1;sp|Q8C5L7|RBM34_MOUSE RNA-binding protein 34 OS=Mus musculus GN=Rbm34 PE=1 SV=1;tr|Q8C545|Q8C545_MOUSE Putative uncharacterized protein OS=Mus musculus PE=2 SV=1	662050000	309050000	262170000	47433000	25464000	11886000	10083000	398410000	308690000	591110000	10	10	10	34.8	34.8	34.8	49.116	0	38.887	1233300000	19	8	7	4	8	7	4	8	7	4	7	7	5
692	B2RUP8;Q3UMW8	B2RUP8;Q3UMW8	Ceroid-lipofuscinosis neuronal protein 5 homolog	Cln5	tr|B2RUP8|B2RUP8_MOUSE Ceroid-lipofuscinosis, neuronal 5 OS=Mus musculus GN=Cln5 PE=2 SV=1;sp|Q3UMW8|CLN5_MOUSE Ceroid-lipofuscinosis neuronal protein 5 homolog OS=Mus musculus GN=Cln5 PE=2 SV=1	423150000	304880000	318030000	38743000	15672000	11292000	11779000	345730000	333530000	432510000	8	8	8	21.4	21.4	21.4	39.329	0	12.302	1046100000	25	7	7	6	7	7	6	7	7	6	10	8	7
693	Q69Z33;B2RUQ2	Q69Z33;B2RUQ2		mKIAA2018;Gm608	tr|Q69Z33|Q69Z33_MOUSE MKIAA2018 protein (Fragment) OS=Mus musculus GN=mKIAA2018 PE=4 SV=1;tr|B2RUQ2|B2RUQ2_MOUSE Gene model 608, (NCBI) OS=Mus musculus GN=Gm608 PE=2 SV=1	0	0	0	0	0	0	0	0	0	0	1	1	1	0.8	0.8	0.8	130.89	1	-2	0	0	1	0	0	1	0	0	1	0	0	0	0	0
694	B2RUR0;O35601-2;O35601;Q8CAX4	B2RUR0;O35601-2;O35601;Q8CAX4	FYN-binding protein	Fyb	tr|B2RUR0|B2RUR0_MOUSE FYN binding protein OS=Mus musculus GN=Fyb PE=2 SV=1;sp|O35601-2|FYB_MOUSE Isoform FYB-120 of FYN-binding protein OS=Mus musculus GN=Fyb;sp|O35601|FYB_MOUSE FYN-binding protein OS=Mus musculus GN=Fyb PE=1 SV=2;tr|Q8CAX4|Q8CAX4_MOUSE	913790000	535710000	388000000	43750000	21757000	12755000	9238200	693620000	676600000	658860000	14	14	14	18.9	18.9	18.9	90.054	0	55.938	1837500000	32	9	10	9	9	10	9	9	10	9	10	12	10
695	B2RUR3;P06795;P21447;Q3UMH0	B2RUR3;P06795;P21447	Multidrug resistance protein 1B;Multidrug resistance protein 1A	Abcb1b;Abcb1a	tr|B2RUR3|B2RUR3_MOUSE ATP-binding cassette, sub-family B (MDR/TAP), member 1B OS=Mus musculus GN=Abcb1b PE=2 SV=1;sp|P06795|MDR1B_MOUSE Multidrug resistance protein 1B OS=Mus musculus GN=Abcb1b PE=1 SV=1;sp|P21447|MDR1A_MOUSE Multidrug resistance protein	115200000	207580000	73912000	6102900	1772300	3193500	1137100	107660000	150590000	166940000	7	7	7	7.5	7.5	7.5	140.99	0	20.307	396690000	11	6	6	3	6	6	3	6	6	3	4	4	3
696	B2RUR8;D3Z210;D3YYZ8	B2RUR8	OTU domain-containing protein 7B	Otud7b	sp|B2RUR8|OTU7B_MOUSE OTU domain-containing protein 7B OS=Mus musculus GN=Otud7b PE=1 SV=1	511940000	182660000	318470000	19864000	10038000	3581600	6244500	367180000	371540000	365870000	13	13	11	23.8	23.8	20.8	91.982	0	36.997	1013100000	31	11	6	9	11	6	9	9	5	8	14	6	11
697	Q9D4K6;Q8BI12;B7ZWC9;B7ZWD0;F6UU42;B2RV46	Q9D4K6;Q8BI12;B7ZWC9;B7ZWD0;F6UU42;B2RV46	Spermatogenesis associated 6-like protein	4430402I18Rik;Spata6l	tr|Q9D4K6|Q9D4K6_MOUSE Putative uncharacterized protein OS=Mus musculus PE=2 SV=1;tr|Q8BI12|Q8BI12_MOUSE Putative uncharacterized protein OS=Mus musculus GN=4430402I18Rik PE=2 SV=1;tr|B7ZWC9|B7ZWC9_MOUSE 4430402I18Rik protein OS=Mus musculus GN=4430402I18R	0	0	0	0	0	0	0	0	0	0	1	1	1	6.3	6.3	6.3	32.694	1	-2	0	0	0	0	1	0	0	1	0	0	1	0	0	0
698	Q3TZ80;B2RV69;Q5SYH2;Q3U0H6	Q3TZ80;B2RV69;Q5SYH2;Q3U0H6	Transmembrane protein 199	Tmem199	tr|Q3TZ80|Q3TZ80_MOUSE Putative uncharacterized protein OS=Mus musculus GN=Tmem199 PE=2 SV=1;tr|B2RV69|B2RV69_MOUSE Expressed sequence AI316787 OS=Mus musculus GN=Tmem199 PE=2 SV=1;sp|Q5SYH2|TM199_MOUSE Transmembrane protein 199 OS=Mus musculus GN=Tmem199	368630000	283210000	473130000	102270000	33511000	25747000	43012000	256880000	351880000	424190000	7	7	7	40.9	40.9	40.9	23.129	0	22.768	1125000000	18	4	5	6	4	5	6	4	5	6	6	4	8
699	B2RV71;Q9D1I2;Q80VN1	B2RV71;Q9D1I2	Bcl10-interacting CARD protein	1110007C09Rik	tr|B2RV71|B2RV71_MOUSE RIKEN cDNA 1110007C09, isoform CRA_a OS=Mus musculus GN=1110007C09Rik PE=2 SV=1;sp|Q9D1I2|BINCA_MOUSE Bcl10-interacting CARD protein OS=Mus musculus PE=2 SV=1	116120000	83948000	119220000	22806000	8294200	5996300	8515600	163320000	73491000	147440000	3	3	3	19.1	19.1	19.1	20.936	0.00015198	4.8122	319290000	4	2	3	2	2	3	2	2	3	2	1	1	2
700	Q3V1L7;B2RV73;Q8VHI3;Q3UHF9	Q3V1L7;B2RV73;Q8VHI3	GDP-fucose protein O-fucosyltransferase 2	Pofut2	tr|Q3V1L7|Q3V1L7_MOUSE Putative uncharacterized protein OS=Mus musculus GN=Pofut2 PE=2 SV=1;tr|B2RV73|B2RV73_MOUSE Protein O-fucosyltransferase 2 OS=Mus musculus GN=Pofut2 PE=2 SV=1;sp|Q8VHI3|OFUT2_MOUSE GDP-fucose protein O-fucosyltransferase 2 OS=Mus mus	552510000	692450000	821140000	66648000	17823000	22337000	26488000	728930000	840260000	552770000	11	11	11	28	28	28	49.387	0	20.235	2066100000	20	5	8	5	5	8	5	5	8	5	6	9	5
701	B2RVD5;Q8CBB6;Q921L4;Q8CGP1;P10853;A0JLV3;Q8CGP2;Q64475;Q8CGP2-2;A0JNS9;Q8VEE3;G3X9D5	B2RVD5;Q8CBB6;Q921L4;Q8CGP1;P10853;A0JLV3;Q8CGP2;Q64475;Q8CGP2-2;A0JNS9	Histone H2B;Histone H2B type 1-K;Histone H2B type 1-F/J/L;Histone H2B type 1-P;Histone H2B type 1-B	Hist1h2bk;Hist1h2br;LOC665622;Hist1h2bf;Hist1h2bj;Hist1h2bp;Hist1h2bb;Hist1h2ba	tr|B2RVD5|B2RVD5_MOUSE Histone H2B OS=Mus musculus GN=Hist1h2bk PE=2 SV=1;tr|Q8CBB6|Q8CBB6_MOUSE Histone H2B OS=Mus musculus GN=Hist1h2br PE=2 SV=1;tr|Q921L4|Q921L4_MOUSE Histone H2B OS=Mus musculus GN=LOC665622 PE=2 SV=1;sp|Q8CGP1|H2B1K_MOUSE Histone H2B	253160000000	207870000000	229580000000	62783000000	23015000000	18897000000	20871000000	181000000000	241470000000	273720000000	10	10	0	66.7	66.7	0	13.92	0	102.93	690610000000	317	8	10	8	8	10	8	0	0	0	111	105	101
702	B2RVL6	B2RVL6	Zinc finger CCHC domain-containing protein 24	Zcchc24	sp|B2RVL6|ZCH24_MOUSE Zinc finger CCHC domain-containing protein 24 OS=Mus musculus GN=Zcchc24 PE=1 SV=1	15968000	88203000	85772000	15829000	1330700	7350200	7147700	34884000	72017000	108290000	2	2	2	20.3	20.3	20.3	26.96	0.00015223	4.8576	189940000	5	1	1	2	1	1	2	1	1	2	0	2	3
703	B2RVP5;Q3THW5;P0C0S6;Q8R029;Q3TFU6;Q3UA95;G3UWL7	B2RVP5;Q3THW5;P0C0S6;Q8R029;Q3TFU6;Q3UA95	Histone H2A;Histone H2A.V;Histone H2A.Z	H2afv;H2afz	tr|B2RVP5|B2RVP5_MOUSE Histone H2A OS=Mus musculus GN=H2afv PE=2 SV=1;sp|Q3THW5|H2AV_MOUSE Histone H2A.V OS=Mus musculus GN=H2afv PE=1 SV=3;sp|P0C0S6|H2AZ_MOUSE Histone H2A.Z OS=Mus musculus GN=H2afz PE=1 SV=2;tr|Q8R029|Q8R029_MOUSE Histone H2A OS=Mus musc	16491000000	19940000000	22362000000	9798900000	2748600000	3323300000	3727000000	20555000000	19026000000	20336000000	6	4	4	53.9	46.9	46.9	13.509	0	13.74	58793000000	68	5	6	6	3	4	4	3	4	4	20	24	24
704	B2RVQ1;Q9CQG6-2;Q9CQG6	B2RVQ1;Q9CQG6-2;Q9CQG6	Transmembrane protein 147	Tmem147	tr|B2RVQ1|B2RVQ1_MOUSE Transmembrane protein 147 OS=Mus musculus GN=Tmem147 PE=2 SV=1;sp|Q9CQG6-2|TM147_MOUSE Isoform 2 of Transmembrane protein 147 OS=Mus musculus GN=Tmem147;sp|Q9CQG6|TM147_MOUSE Transmembrane protein 147 OS=Mus musculus GN=Tmem147 PE=2	0	0	46702000	3592500	0	0	3592500	0	0	56564000	1	1	1	5.4	5.4	5.4	25.335	0.0070121	1.7001	46702000	0	0	0	1	0	0	1	0	0	1	0	0	0
705	B2RVQ7;Q9D115	B2RVQ7;Q9D115	Zinc finger protein 706	Zfp706;Znf706	tr|B2RVQ7|B2RVQ7_MOUSE Zinc finger protein 706 OS=Mus musculus GN=Zfp706 PE=2 SV=1;sp|Q9D115|ZN706_MOUSE Zinc finger protein 706 OS=Mus musculus GN=Znf706 PE=2 SV=1	72635000	128820000	232540000	72331000	12106000	21469000	38756000	92713000	130390000	216740000	3	3	3	39.5	39.5	39.5	8.4977	0.00014631	3.9485	433990000	9	2	3	3	2	3	3	2	3	3	2	3	4
706	Q3U3W2;B2RVR2;Q3TM85;Q80TD8	Q3U3W2;B2RVR2;Q3TM85;Q80TD8		Tmem181a;Tmem181b-ps;mKIAA1423	tr|Q3U3W2|Q3U3W2_MOUSE Protein Tmem181a OS=Mus musculus GN=Tmem181a PE=2 SV=1;tr|B2RVR2|B2RVR2_MOUSE Predicted gene, 547127 OS=Mus musculus GN=547127 PE=2 SV=1;tr|Q3TM85|Q3TM85_MOUSE Putative uncharacterized protein (Fragment) OS=Mus musculus PE=2 SV=1;tr|	517510000	137050000	1470700000	106260000	25876000	6852700	73536000	501750000	309470000	1624200000	4	4	4	9.3	9.3	9.3	54.983	0.00015133	4.6954	2125300000	10	1	3	3	1	3	3	1	3	3	3	3	4
707	B2RVT1;D3Z159;Q3U898	B2RVT1;D3Z159;Q3U898	Myeloma-overexpressed gene 2 protein homolog	Myeov2	tr|B2RVT1|B2RVT1_MOUSE MCG20113, isoform CRA_e OS=Mus musculus GN=Myeov2 PE=2 SV=1;tr|D3Z159|D3Z159_MOUSE MCG20113, isoform CRA_d OS=Mus musculus GN=Myeov2 PE=4 SV=1;sp|Q3U898|MYOV2_MOUSE Myeloma-overexpressed gene 2 protein homolog OS=Mus musculus GN=Myeo	93874000	0	0	93874000	93874000	0	0	93874000	0	0	1	1	1	35.1	35.1	35.1	6.1966	0	7.7359	93874000	1	1	0	0	1	0	0	1	0	0	1	0	0
708	B2RWB7;Q8BZA9	B2RWB7;Q8BZA9	Fructose-2,6-bisphosphatase TIGAR	9630033F20Rik;Tigar	tr|B2RWB7|B2RWB7_MOUSE 9630033F20Rik protein OS=Mus musculus GN=9630033F20Rik PE=2 SV=1;sp|Q8BZA9|TIGAR_MOUSE Fructose-2,6-bisphosphatase TIGAR OS=Mus musculus GN=Tigar PE=1 SV=1	172600000	378810000	186430000	49190000	11507000	25254000	12429000	245700000	275200000	292990000	4	4	4	27.1	27.1	27.1	29.19	0	20.966	737850000	10	2	4	2	2	4	2	2	4	2	2	5	3
709	F8WIX8;Q149V4;B2RWH3;Q64523;Q6GSS7	F8WIX8;Q149V4;B2RWH3;Q64523;Q6GSS7	Histone H2A;Histone H2A type 2-C;Histone H2A type 2-A	Hist1h2al;Hist2h2ac;Hist2h2aa1	tr|F8WIX8|F8WIX8_MOUSE Histone H2A OS=Mus musculus GN=Hist1h2al PE=3 SV=1;tr|Q149V4|Q149V4_MOUSE Histone H2A OS=Mus musculus GN=Hist2h2ac PE=2 SV=1;tr|B2RWH3|B2RWH3_MOUSE Histone H2A OS=Mus musculus GN=Hist2h2aa1 PE=2 SV=1;sp|Q64523|H2A2C_MOUSE Histone H2A	523730000	479230000	202800000	172250000	74818000	68461000	28971000	371820000	516310000	251520000	7	2	1	60	32	8.8	13.607	0	28.555	1205800000	28	7	7	7	2	2	2	1	1	1	11	10	7
710	B2RWI2;Q9EP89;Q80UJ8;A1A4A8;Q3UEQ3;A0PJ65	B2RWI2;Q9EP89;Q80UJ8	Serine beta-lactamase-like protein LACTB, mitochondrial	Lactb	tr|B2RWI2|B2RWI2_MOUSE Lactamase, beta OS=Mus musculus GN=Lactb PE=2 SV=1;sp|Q9EP89|LACTB_MOUSE Serine beta-lactamase-like protein LACTB, mitochondrial OS=Mus musculus GN=Lactb PE=1 SV=1;tr|Q80UJ8|Q80UJ8_MOUSE Lactb protein OS=Mus musculus GN=Lactb PE=2 SV	742000000	633200000	781910000	65367000	22485000	19188000	23694000	572760000	810580000	748310000	10	10	10	28.3	28.3	28.3	60.705	0	30.322	2157100000	24	8	7	6	8	7	6	8	7	6	10	6	8
711	Q8BY61;B2RWR9;Q8CGV9	Q8BY61;B2RWR9;Q8CGV9	Teashirt homolog 3	Tshz3	tr|Q8BY61|Q8BY61_MOUSE Putative uncharacterized protein (Fragment) OS=Mus musculus GN=Tshz3 PE=2 SV=1;tr|B2RWR9|B2RWR9_MOUSE Teashirt zinc finger family member 3 OS=Mus musculus GN=Tshz3 PE=2 SV=1;sp|Q8CGV9|TSH3_MOUSE Teashirt homolog 3 OS=Mus musculus GN=	0	0	0	0	0	0	0	0	0	0	1	1	1	1.6	1.6	1.6	81.96	1	-2	0	0	0	1	1	0	1	1	0	1	1	0	0	0
712	B2RWS6;Q8BJ14	B2RWS6	Histone acetyltransferase p300	Ep300	sp|B2RWS6|EP300_MOUSE Histone acetyltransferase p300 OS=Mus musculus GN=Ep300 PE=1 SV=2	635200000	667140000	619710000	23157000	7653000	8037800	7466400	609380000	710750000	653600000	16	16	8	10	10	5.7	263.3	0	39.582	1922100000	40	9	14	11	9	14	11	2	7	4	13	15	12
713	B2RWS7;Q8BZ47	B2RWS7;Q8BZ47	Zinc finger protein 609	Zfp609;Znf609	tr|B2RWS7|B2RWS7_MOUSE Zinc finger protein 609 OS=Mus musculus GN=Zfp609 PE=2 SV=1;sp|Q8BZ47|ZN609_MOUSE Zinc finger protein 609 OS=Mus musculus GN=Znf609 PE=1 SV=2	317630000	57870000	243310000	9668900	4963000	904210	3801700	211740000	192960000	267710000	9	9	9	12.6	12.6	12.6	145.89	0	21.593	618810000	17	8	4	6	8	4	6	8	4	6	8	4	5
714	B2RWT9;Q8CJH3	B2RWT9;Q8CJH3	Plexin-B1	Plxnb1	tr|B2RWT9|B2RWT9_MOUSE Plexin B1 OS=Mus musculus GN=Plxnb1 PE=2 SV=1;sp|Q8CJH3|PLXB1_MOUSE Plexin-B1 OS=Mus musculus GN=Plxnb1 PE=1 SV=2	331280000	615140000	411070000	14141000	3450900	6407700	4282000	516120000	471460000	457810000	22	22	22	15.4	15.4	15.4	231.44	0	57.667	1357500000	38	9	16	13	9	16	13	9	16	13	10	16	12
715	F7CK17;B2RWU3;Q9JL70;D3Z6Y5	F7CK17;B2RWU3;Q9JL70;D3Z6Y5	Fanconi anemia group A protein homolog	Fanca	tr|F7CK17|F7CK17_MOUSE Fanconi anemia group A protein homolog (Fragment) OS=Mus musculus GN=Fanca PE=4 SV=1;tr|B2RWU3|B2RWU3_MOUSE Fanconi anemia, complementation group A OS=Mus musculus GN=Fanca PE=2 SV=1;sp|Q9JL70|FANCA_MOUSE Fanconi anemia group A prote	10426000	13853000	0	516570	221820	294750	0	13269000	9200300	0	2	2	2	4.9	4.9	4.9	85.609	0	8.4335	24279000	3	1	2	0	1	2	0	1	2	0	1	2	0
716	E9Q6G4;B2RWU5;Q91V24;B7ZNA4;Q8R1I3	E9Q6G4;B2RWU5;Q91V24;B7ZNA4	ATP-binding cassette sub-family A member 7	Abca7	tr|E9Q6G4|E9Q6G4_MOUSE ATP-binding cassette sub-family A member 7 OS=Mus musculus GN=Abca7 PE=1 SV=1;tr|B2RWU5|B2RWU5_MOUSE Abca7 protein OS=Mus musculus GN=Abca7 PE=2 SV=1;sp|Q91V24|ABCA7_MOUSE ATP-binding cassette sub-family A member 7 OS=Mus musculus GN	16343000	36653000	20445000	706150	157140	352430	196580	14626000	26986000	29504000	5	4	3	4.1	3.2	2.9	237.75	0	8.5341	73440000	8	3	4	2	3	3	2	2	3	1	3	3	2
717	B2RWU7;D3Z2E7;E9Q3L4;G3UXS8;G3UY50;E9PVL3;E9PUG6;E9QAN9;Q504N7;Q8BV49	B2RWU7;D3Z2E7;E9Q3L4		AI607873	tr|B2RWU7|B2RWU7_MOUSE AI607873 protein OS=Mus musculus GN=AI607873 PE=2 SV=1;tr|D3Z2E7|D3Z2E7_MOUSE Protein AI607873 OS=Mus musculus GN=AI607873 PE=4 SV=1;tr|E9Q3L4|E9Q3L4_MOUSE Protein AI607873 OS=Mus musculus GN=AI607873 PE=4 SV=2	9514600	7018600	15343000	758950	226540	167110	365300	10223000	9688400	11954000	5	1	1	7.8	1.5	1.5	107.78	0.0031974	2.0958	31876000	3	3	3	4	1	1	1	1	1	1	1	1	1
718	B2RWW1;Q8C052	B2RWW1;Q8C052	Microtubule-associated protein 1S;MAP1S heavy chain;MAP1S light chain	Map1s	tr|B2RWW1|B2RWW1_MOUSE Microtubule-associated protein 1S OS=Mus musculus GN=Map1s PE=2 SV=1;sp|Q8C052|MAP1S_MOUSE Microtubule-associated protein 1S OS=Mus musculus GN=Map1s PE=1 SV=2	3103700000	2024600000	2686700000	186070000	73899000	48204000	63969000	2979200000	2156600000	3008400000	21	21	21	36.9	36.9	36.9	103.02	0	84.149	7815000000	82	20	15	18	20	15	18	20	15	18	30	25	27
719	B7ZCJ0;B2RWX1;B7ZCJ1;Q6DFV3;G3UWM5;G3UX38;F6WQR2	B7ZCJ0;B2RWX1;B7ZCJ1;Q6DFV3;G3UWM5	Rho GTPase-activating protein 21	Arhgap21	tr|B7ZCJ0|B7ZCJ0_MOUSE Rho GTPase-activating protein 21 OS=Mus musculus GN=Arhgap21 PE=1 SV=1;tr|B2RWX1|B2RWX1_MOUSE Arhgap21 protein OS=Mus musculus GN=Arhgap21 PE=2 SV=1;tr|B7ZCJ1|B7ZCJ1_MOUSE Rho GTPase-activating protein 21 OS=Mus musculus GN=Arhgap21	104660000	94086000	93625000	2377000	850920	764930	761180	118200000	30626000	134660000	8	8	8	6.7	6.7	6.7	215.86	0	18.501	292370000	11	4	5	4	4	5	4	4	5	4	4	3	4
720	E9QPY6;B2RWY6;P13705;Q3V2Z1;Q8CGC9;Q3TTD3;Q62156;Q8C9T6	E9QPY6;B2RWY6;P13705	DNA mismatch repair protein Msh3	Msh3	tr|E9QPY6|E9QPY6_MOUSE DNA mismatch repair protein Msh3 OS=Mus musculus GN=Msh3 PE=3 SV=1;tr|B2RWY6|B2RWY6_MOUSE MutS homolog 3 (E. coli) OS=Mus musculus GN=Msh3 PE=2 SV=1;sp|P13705|MSH3_MOUSE DNA mismatch repair protein Msh3 OS=Mus musculus GN=Msh3 PE=2 S	175520000	213230000	34355000	6044400	2507400	3046200	490790	159800000	119800000	178320000	12	12	12	18.2	18.2	18.2	123.4	0	13.741	423110000	21	7	9	4	7	9	4	7	9	4	8	9	4
721	Q8CHH8;F7CC56;B2RX00;Q9ESK9;E9PX56;Q6NZG0;F7CCJ3;F6TLJ4	Q8CHH8;F7CC56;B2RX00;Q9ESK9;E9PX56;Q6NZG0	RB1-inducible coiled-coil protein 1	Rb1cc1	tr|Q8CHH8|Q8CHH8_MOUSE MKIAA0203 protein (Fragment) OS=Mus musculus GN=Rb1cc1 PE=2 SV=1;tr|F7CC56|F7CC56_MOUSE RB1-inducible coiled-coil protein 1 (Fragment) OS=Mus musculus GN=Rb1cc1 PE=1 SV=1;tr|B2RX00|B2RX00_MOUSE RB1-inducible coiled-coil 1 OS=Mus musc	175310000	439460000	176370000	8156100	1807400	4530500	1818300	185880000	419840000	188300000	11	11	11	9.3	9.3	9.3	168.87	0	20.104	791150000	15	5	6	4	5	6	4	5	6	4	4	7	4
722	B2RX02;Q3U381	B2RX02;Q3U381	Zinc finger protein 692	Zfp692;Znf692	tr|B2RX02|B2RX02_MOUSE Zinc finger protein 692 OS=Mus musculus GN=Zfp692 PE=2 SV=1;sp|Q3U381|ZN692_MOUSE Zinc finger protein 692 OS=Mus musculus GN=Znf692 PE=2 SV=1	0	0	19900000	865240	0	0	865240	0	0	19863000	1	1	1	3.2	3.2	3.2	59.01	0.0034616	2.0801	19900000	1	0	0	1	0	0	1	0	0	1	0	0	1
723	G3X9Z4;B2RX07;Q69ZY3;Q3TT32;Q3TTQ0;F6UFZ5;A5HLW1;A5HLW0;Q6PCW0;Q99KH9;Q8R2P5;Q8K0S1	G3X9Z4;B2RX07;Q69ZY3;Q3TT32;Q3TTQ0;F6UFZ5		Pcf11	tr|G3X9Z4|G3X9Z4_MOUSE Cleavage and polyadenylation factor subunit homolog (S. cerevisiae) OS=Mus musculus GN=Pcf11 PE=4 SV=1;tr|B2RX07|B2RX07_MOUSE Cleavage and polyadenylation factor subunit homolog (S. cerevisiae) OS=Mus musculus GN=Pcf11 PE=2 SV=1;tr|Q	217230000	180720000	80569000	4933100	2239400	1863100	830610	217410000	131960000	126140000	12	12	12	12.5	12.5	12.5	172.72	0	28.454	478510000	17	7	7	4	7	7	4	7	7	4	6	7	4
724	B2RX11;Q0KK55;F6SPU5;D3Z5B8;Q0KK55-3	B2RX11;Q0KK55;F6SPU5;D3Z5B8;Q0KK55-3	Protein very KIND	Kndc1	tr|B2RX11|B2RX11_MOUSE Kinase non-catalytic C-lobe domain (KIND) containing 1 OS=Mus musculus GN=Kndc1 PE=2 SV=1;sp|Q0KK55|VKIND_MOUSE Protein very KIND OS=Mus musculus GN=Kndc1 PE=1 SV=2;tr|F6SPU5|F6SPU5_MOUSE Protein very KIND (Fragment) OS=Mus musculus	35823000	46416000	37983000	1278900	381090	493780	404070	40596000	41400000	39742000	2	2	2	1.3	1.3	1.3	191.39	0.0042311	1.9784	120220000	4	1	1	2	1	1	2	1	1	2	1	1	2
725	J3QML2;B2RX12-3;B2RX12-2;B2RX12;Q59DK8	J3QML2;B2RX12-3;B2RX12-2;B2RX12	Canalicular multispecific organic anion transporter 2	Abcc3	tr|J3QML2|J3QML2_MOUSE Canalicular multispecific organic anion transporter 2 OS=Mus musculus GN=Abcc3 PE=1 SV=1;sp|B2RX12-3|MRP3_MOUSE Isoform 3 of Canalicular multispecific organic anion transporter 2 OS=Mus musculus GN=Abcc3;sp|B2RX12-2|MRP3_MOUSE Isofor	134420000	22567000	56294000	3231600	2036700	341930	852940	97397000	64124000	59116000	3	2	2	2.4	1.4	1.4	169.22	0.0088918	1.6027	213280000	7	2	2	2	1	1	2	1	1	2	3	2	2
726	B2RX13;Q3UQ28;Q80U60;D3Z5M7	B2RX13;Q3UQ28;Q80U60	Peroxidasin homolog	Pxdn	tr|B2RX13|B2RX13_MOUSE Peroxidasin homolog (Drosophila) OS=Mus musculus GN=Pxdn PE=2 SV=1;sp|Q3UQ28|PXDN_MOUSE Peroxidasin homolog OS=Mus musculus GN=Pxdn PE=2 SV=2;tr|Q80U60|Q80U60_MOUSE MKIAA0230 protein (Fragment) OS=Mus musculus GN=Pxdn PE=2 SV=1	454140000	891450000	792530000	24576000	5219900	10247000	9109500	646320000	733920000	780700000	22	22	22	22.6	22.6	22.6	165.12	0	64.104	2138100000	44	11	16	15	11	16	15	11	16	15	13	18	13
727	B2RX15;Q6ZPS6	B2RX15;Q6ZPS6	Ankyrin repeat and IBR domain-containing protein 1	Ankib1	tr|B2RX15|B2RX15_MOUSE Ankib1 protein OS=Mus musculus GN=Ankib1 PE=2 SV=1;sp|Q6ZPS6|AKIB1_MOUSE Ankyrin repeat and IBR domain-containing protein 1 OS=Mus musculus GN=Ankib1 PE=1 SV=2	58630000	117250000	13635000	3106700	961140	1922100	223520	53575000	63796000	58795000	5	5	5	8.2	8.2	8.2	122.61	0.00057021	3.379	189510000	8	3	3	2	3	3	2	3	3	2	3	3	2
728	B2RX33;Q8BWB6;D3YUM6;D3Z1C4	B2RX33;Q8BWB6;D3YUM6;D3Z1C4	Metalloreductase STEAP2	Steap2	tr|B2RX33|B2RX33_MOUSE MCG2960, isoform CRA_b OS=Mus musculus GN=Steap2 PE=2 SV=1;sp|Q8BWB6|STEA2_MOUSE Metalloreductase STEAP2 OS=Mus musculus GN=Steap2 PE=2 SV=1;tr|D3YUM6|D3YUM6_MOUSE MCG2960, isoform CRA_a OS=Mus musculus GN=Steap2 PE=4 SV=1;tr|D3Z1C4|	151420000	34958000	410750000	20591000	5221400	1205500	14164000	319440000	0	321060000	5	5	5	15.1	15.1	15.1	55.76	0.00015708	5.6755	597130000	4	4	1	2	4	1	2	4	1	2	3	0	1
729	B2RX66;Q5F2E8;Q3UUG1;F6RXB5	B2RX66;Q5F2E8	Serine/threonine-protein kinase TAO1	Taok1	tr|B2RX66|B2RX66_MOUSE MCG124812 OS=Mus musculus GN=Taok1 PE=2 SV=1;sp|Q5F2E8|TAOK1_MOUSE Serine/threonine-protein kinase TAO1 OS=Mus musculus GN=Taok1 PE=1 SV=1	757470000	856780000	944880000	44897000	13289000	15031000	16577000	753780000	1050100000	788300000	18	18	16	20	20	17.3	116.05	0	42.571	2559100000	47	10	13	13	10	13	13	8	12	12	14	17	16
730	Q3UFN2;B2RX76;Q9CYK2-2;Q9CYK2	Q3UFN2;B2RX76;Q9CYK2-2;Q9CYK2	Glutaminyl-peptide cyclotransferase	Qpct	tr|Q3UFN2|Q3UFN2_MOUSE Putative uncharacterized protein OS=Mus musculus GN=Qpct PE=2 SV=1;tr|B2RX76|B2RX76_MOUSE Glutaminyl-peptide cyclotransferase (Glutaminyl cyclase) OS=Mus musculus GN=Qpct PE=2 SV=1;sp|Q9CYK2-2|QPCT_MOUSE Isoform 2 of Glutaminyl-pepti	64898000	0	43180000	6004400	3605500	0	2398900	69816000	0	55695000	2	2	2	6.4	6.4	6.4	41.094	0	7.8231	108080000	3	2	0	2	2	0	2	2	0	2	2	0	1
731	B2RX77;Q9D483;D3YYS2;Q9D483-2	B2RX77;Q9D483	DNA-directed RNA polymerase III subunit RPC3	Polr3c	tr|B2RX77|B2RX77_MOUSE MCG14870 OS=Mus musculus GN=Polr3c PE=2 SV=1;sp|Q9D483|RPC3_MOUSE DNA-directed RNA polymerase III subunit RPC3 OS=Mus musculus GN=Polr3c PE=2 SV=1	165150000	260780000	207680000	17600000	4587500	7244000	5768800	207330000	271540000	252460000	8	8	8	23.8	23.8	23.8	60.705	0	21.934	633610000	14	3	5	4	3	5	4	3	5	4	5	5	4
732	B2RXC1;B2RXC1-2;REV__E9Q099	B2RXC1	Trafficking protein particle complex subunit 11	Trappc11	sp|B2RXC1|TPC11_MOUSE Trafficking protein particle complex subunit 11 OS=Mus musculus GN=Trappc11 PE=2 SV=1	1361100000	1229700000	741400000	52066000	21267000	19215000	11584000	1223400000	1174400000	1175100000	23	23	23	32.8	32.8	32.8	128.39	0	80.103	3332200000	59	16	18	15	16	18	15	16	18	15	21	20	18
733	B2RXC6;Q7TSI4	B2RXC6	DNA-directed RNA polymerase	Polr3a	tr|B2RXC6|B2RXC6_MOUSE DNA-directed RNA polymerase OS=Mus musculus GN=Polr3a PE=2 SV=1	812440000	694590000	732570000	23329000	8462900	7235300	7631000	904760000	746010000	738100000	23	22	22	24.5	24.1	24.1	155.74	0	51.036	2239600000	44	13	14	16	12	14	15	12	14	15	12	14	18
734	B2RXC8;Q8BXX8;Q8K2F4;Q8BVE6;Q3V1Y6;G3X9E8	B2RXC8;Q8BXX8		Ppp2r3a	tr|B2RXC8|B2RXC8_MOUSE 3222402P14Rik protein OS=Mus musculus GN=Ppp2r3a PE=2 SV=1;tr|Q8BXX8|Q8BXX8_MOUSE Putative uncharacterized protein (Fragment) OS=Mus musculus GN=Ppp2r3a PE=2 SV=1	119110000	92081000	53537000	4136400	1861100	1438800	836510	70955000	115890000	70551000	6	6	6	6.3	6.3	6.3	130.26	0	10.928	264730000	8	1	5	2	1	5	2	1	5	2	1	5	2
735	B7ZWI2;B2RXM7;Q9D1J3	B7ZWI2;B2RXM7;Q9D1J3	SAP domain-containing ribonucleoprotein	1110005A23Rik;Sarnp	tr|B7ZWI2|B7ZWI2_MOUSE 1110005A23Rik protein OS=Mus musculus GN=1110005A23Rik PE=2 SV=1;tr|B2RXM7|B2RXM7_MOUSE MCG113697 OS=Mus musculus GN=1110005A23Rik PE=2 SV=1;sp|Q9D1J3|SARNP_MOUSE SAP domain-containing ribonucleoprotein OS=Mus musculus GN=Sarnp PE=1	10562000000	6502000000	10234000000	1819900000	704130000	433470000	682270000	10729000000	7726000000	10290000000	9	9	9	39.2	39.2	39.2	23.461	0	67.899	27298000000	55	8	7	8	8	7	8	8	7	8	23	13	19
736	B2RXP1;Q8BVU0;E9QAU9;B7ZWM8;E9Q892;F6YZL6;F6Y466;F6TPH7;E9Q0H5;F6VQ19;Q3UMG5-2;Q3UMG5-3;Q3UMG5	B2RXP1;Q8BVU0;E9QAU9;B7ZWM8;E9Q892	Leucine-rich repeat and calponin homology domain-containing protein 3	Lrch3	tr|B2RXP1|B2RXP1_MOUSE Leucine-rich repeat and calponin homology domain-containing protein 3 OS=Mus musculus GN=Lrch3 PE=2 SV=1;sp|Q8BVU0|LRCH3_MOUSE Leucine-rich repeat and calponin homology domain-containing protein 3 OS=Mus musculus GN=Lrch3 PE=2 SV=3;t	1848900000	1792700000	1330600000	127490000	47408000	45965000	34119000	1799900000	1916600000	1455300000	22	22	22	46	46	46	82.277	0	133.01	4972200000	63	16	16	15	16	16	15	16	16	15	23	18	22
737	E9Q3A7;B2RXP4;Q3UFN0	E9Q3A7;B2RXP4;Q3UFN0		Cdh19	tr|E9Q3A7|E9Q3A7_MOUSE Protein Cdh19 OS=Mus musculus GN=Cdh19 PE=4 SV=1;tr|B2RXP4|B2RXP4_MOUSE Cadherin 19, type 2 OS=Mus musculus GN=Cdh19 PE=2 SV=1;tr|Q3UFN0|Q3UFN0_MOUSE Putative uncharacterized protein (Fragment) OS=Mus musculus GN=Cdh19 PE=2 SV=1	486500000	209150000	439730000	29878000	12803000	5503900	11572000	509190000	332340000	386090000	8	8	8	14.7	14.7	14.7	87.259	0	20.235	1135400000	17	7	4	6	7	4	6	7	4	6	6	3	8
738	B7ZWG0;B2RXP7;E9QMB7;Q8CES0;Q8CES0-2;F6QNU4	B7ZWG0;B2RXP7;E9QMB7;Q8CES0;Q8CES0-2	N-alpha-acetyltransferase 30	Naa30	tr|B7ZWG0|B7ZWG0_MOUSE Nat12 protein OS=Mus musculus GN=Naa30 PE=2 SV=1;tr|B2RXP7|B2RXP7_MOUSE MCG2335 OS=Mus musculus GN=Naa30 PE=2 SV=1;tr|E9QMB7|E9QMB7_MOUSE N-alpha-acetyltransferase 30 OS=Mus musculus GN=Naa30 PE=1 SV=1;sp|Q8CES0|NAA30_MOUSE N-alpha-a	228000000	126830000	180010000	28149000	12000000	6675300	9474200	220430000	139630000	206580000	6	6	6	19.8	19.8	19.8	39.428	0	23.871	534840000	12	5	4	4	5	4	4	5	4	4	5	4	3
739	B2RXW8;B2RXQ2;B8QI33;S4R1D4;B8QI34;Q5DTM9;Q8BSS9;Q3UJC0;S4R1I7;Q69ZW5;B8QI36	B2RXW8;B2RXQ2;B8QI33		Ppfia1	tr|B2RXW8|B2RXW8_MOUSE Ppfia1 protein OS=Mus musculus GN=Ppfia1 PE=1 SV=1;tr|B2RXQ2|B2RXQ2_MOUSE Ppfia1 protein OS=Mus musculus GN=Ppfia1 PE=1 SV=1;tr|B8QI33|B8QI33_MOUSE Liprin-alpha 1 OS=Mus musculus GN=Ppfia1 PE=2 SV=1	2202200000	2304700000	2639300000	92809000	28600000	29932000	34277000	2400800000	2486300000	2555800000	28	28	23	29.8	29.8	26.2	140.13	0	160.02	7146300000	89	23	19	26	23	19	26	18	16	21	32	23	34
740	B7ZWK5;E9Q839;B2RXQ3;Q6P9P0;Q3UH46;Q8BZ50;Q3TST9	B7ZWK5;E9Q839;B2RXQ3;Q6P9P0;Q3UH46;Q8BZ50;Q3TST9	Protein FAM178A	Fam178a	tr|B7ZWK5|B7ZWK5_MOUSE Fam178a protein OS=Mus musculus GN=Fam178a PE=2 SV=1;tr|E9Q839|E9Q839_MOUSE Protein FAM178A OS=Mus musculus GN=Fam178a PE=4 SV=1;tr|B2RXQ3|B2RXQ3_MOUSE Family with sequence similarity 178, member A OS=Mus musculus GN=Fam178a PE=2 SV=	42378000	83701000	37360000	2514500	651980	1287700	574770	48965000	64119000	68083000	4	4	4	3.9	3.9	3.9	127.9	0.00015085	4.6281	163440000	11	1	4	2	1	4	2	1	4	2	3	5	3
741	B2RXQ4;B7ZWK0;Q69Z74;B2RXX0;P51954;Q8CD72;F6R259;Q8BSB6	B2RXQ4;B7ZWK0;Q69Z74;B2RXX0;P51954;Q8CD72	Serine/threonine-protein kinase Nek1	Nek1	tr|B2RXQ4|B2RXQ4_MOUSE Nek1 protein OS=Mus musculus GN=Nek1 PE=2 SV=1;tr|B7ZWK0|B7ZWK0_MOUSE Nek1 protein OS=Mus musculus GN=Nek1 PE=1 SV=1;tr|Q69Z74|Q69Z74_MOUSE MKIAA1901 protein (Fragment) OS=Mus musculus GN=Nek1 PE=2 SV=1;tr|B2RXX0|B2RXX0_MOUSE Nek1 pr	0	288350000	19213000	4457500	0	4179000	278450	0	0	27262000	3	3	3	3.1	3.1	3.1	133.85	0.0030769	2.1735	307560000	2	0	1	2	0	1	2	0	1	2	0	1	1
742	B2RXQ8;Q8BFQ4	B2RXQ8;Q8BFQ4	WD repeat-containing protein 82	Wdr82	tr|B2RXQ8|B2RXQ8_MOUSE MCG19514, isoform CRA_a OS=Mus musculus GN=Wdr82 PE=2 SV=1;sp|Q8BFQ4|WDR82_MOUSE WD repeat-containing protein 82 OS=Mus musculus GN=Wdr82 PE=1 SV=1	2852400000	2732200000	2653000000	411880000	142620000	136610000	132650000	3060300000	2980500000	3070700000	17	17	17	55.3	55.3	55.3	35.079	0	83.953	8237600000	67	15	14	13	15	14	13	15	14	13	24	22	21
743	B2RXR1;Q4QRL3-2;Q4QRL3	B2RXR1;Q4QRL3-2;Q4QRL3	Coiled-coil domain-containing protein 88B	Ccdc88b	tr|B2RXR1|B2RXR1_MOUSE Coiled-coil domain containing 88B OS=Mus musculus GN=Ccdc88b PE=2 SV=1;sp|Q4QRL3-2|CC88B_MOUSE Isoform 2 of Coiled-coil domain-containing protein 88B OS=Mus musculus GN=Ccdc88b;sp|Q4QRL3|CC88B_MOUSE Coiled-coil domain-containing prot	0	0	0	0	0	0	0	0	0	0	1	1	1	1.1	1.1	1.1	166.59	1	-2	0	0	0	0	1	0	0	1	0	0	1	0	0	0
744	B2RXR2;Q8VD65;B2RY05	B2RXR2;Q8VD65;B2RY05	Phosphoinositide 3-kinase regulatory subunit 4	Pik3r4	tr|B2RXR2|B2RXR2_MOUSE Phosphatidylinositol 3 kinase, regulatory subunit, polypeptide 4, p150 OS=Mus musculus GN=Pik3r4 PE=2 SV=1;sp|Q8VD65|PI3R4_MOUSE Phosphoinositide 3-kinase regulatory subunit 4 OS=Mus musculus GN=Pik3r4 PE=1 SV=3;tr|B2RY05|B2RY05_MOUS	1700000000	2237300000	2305100000	85513000	23288000	30648000	31577000	2548800000	1914600000	2272000000	32	32	32	37.8	37.8	37.8	152.57	0	92.77	6242400000	72	19	24	24	19	24	24	19	24	24	24	21	27
745	E9QNQ2;B2RXR6;J3QK13	E9QNQ2;B2RXR6;J3QK13	Serine/threonine-protein phosphatase 6 regulatory ankyrin repeat subunit B	Ankrd44	tr|E9QNQ2|E9QNQ2_MOUSE Serine/threonine-protein phosphatase 6 regulatory ankyrin repeat subunit B OS=Mus musculus GN=Ankrd44 PE=4 SV=1;sp|B2RXR6|ANR44_MOUSE Serine/threonine-protein phosphatase 6 regulatory ankyrin repeat subunit B OS=Mus musculus GN=Ankrd	29443000	8140400	0	751670	588860	162810	0	18571000	18466000	0	2	1	1	2.6	1.6	1.6	109.35	0.00014663	4.028	37583000	3	1	2	0	1	1	0	1	1	0	2	1	0
746	B2RXX5;B2RXR8;E9PX39	B2RXX5;B2RXR8;E9PX39		Adamts14	tr|B2RXX5|B2RXX5_MOUSE A disintegrin-like and metallopeptidase (Reprolysin type) with thrombospondin type 1 motif, 14 OS=Mus musculus GN=Adamts14 PE=2 SV=1;tr|B2RXR8|B2RXR8_MOUSE A disintegrin-like and metallopeptidase (Reprolysin type) with thrombospondin	0	0	0	0	0	0	0	0	0	0	1	1	1	1.1	1.1	1.1	133.64	0.0097411	1.5277	0	1	1	0	0	1	0	0	1	0	0	1	0	0
747	B2RXS3;Q69ZJ3;F8VQ70;Q501L8;Q8BKW5;Q8BX16;Q8C0H1;Q8BIZ8;Q80VY7	B2RXS3;Q69ZJ3;F8VQ70;Q501L8;Q8BKW5;Q8BX16;Q8C0H1;Q8BIZ8		Scaper	tr|B2RXS3|B2RXS3_MOUSE Scaper protein OS=Mus musculus GN=Scaper PE=2 SV=1;tr|Q69ZJ3|Q69ZJ3_MOUSE MKIAA1454 protein (Fragment) OS=Mus musculus GN=Scaper PE=2 SV=1;tr|F8VQ70|F8VQ70_MOUSE Protein Scaper OS=Mus musculus GN=Scaper PE=4 SV=1;tr|Q501L8|Q501L8_MOU	17043000	117640000	50927000	2442200	224250	1547900	670090	36258000	82820000	66462000	6	6	6	6.6	6.6	6.6	157.14	0	8.805	185610000	8	2	4	3	2	4	3	2	4	3	2	4	2
748	B2RXS4;Q8CHG6;Q99LF0;Q8K2J5;Q9QZC2	B2RXS4;Q8CHG6	Plexin-B2	Plxnb2;mKIAA0315	sp|B2RXS4|PLXB2_MOUSE Plexin-B2 OS=Mus musculus GN=Plxnb2 PE=1 SV=1;tr|Q8CHG6|Q8CHG6_MOUSE MKIAA0315 protein (Fragment) OS=Mus musculus GN=mKIAA0315 PE=4 SV=2	3236500000	4621800000	2904200000	107620000	32365000	46218000	29042000	3594900000	3914600000	3613000000	42	42	40	34.7	34.7	34	206.23	0	203.14	10762000000	125	31	32	30	31	32	30	29	30	29	47	37	41
749	B2RY08;E9QMR2;B2RY79;B2RXS7;F8VPN7;Q8BIK4;Q8BIK4-2;Q7TN11;Q6PF84;Q8BIK4-3;Q3UYH1;A2AF65	B2RY08;E9QMR2;B2RY79;B2RXS7;F8VPN7;Q8BIK4;Q8BIK4-2;Q7TN11	Dedicator of cytokinesis protein 9	Dock9	tr|B2RY08|B2RY08_MOUSE Dock9 protein OS=Mus musculus GN=Dock9 PE=2 SV=1;tr|E9QMR2|E9QMR2_MOUSE Dedicator of cytokinesis protein 9 OS=Mus musculus GN=Dock9 PE=4 SV=1;tr|B2RY79|B2RY79_MOUSE Dock9 protein OS=Mus musculus GN=Dock9 PE=2 SV=1;tr|B2RXS7|B2RXS7_MO	450130000	1001100000	581830000	17230000	3814600	8484200	4930700	763220000	790890000	498760000	22	22	21	16.2	16.2	15.7	233.74	0	53.294	2033100000	43	12	14	12	12	14	12	11	14	12	13	18	12
750	B2RXT3;E9Q7L0	B2RXT3;E9Q7L0		Ogdhl	tr|B2RXT3|B2RXT3_MOUSE Ogdhl protein OS=Mus musculus GN=Ogdhl PE=2 SV=1;tr|E9Q7L0|E9Q7L0_MOUSE Protein Ogdhl OS=Mus musculus GN=Ogdhl PE=4 SV=1	5700000000	6149000000	5577900000	335130000	109620000	118250000	107270000	6987600000	6152200000	5267000000	33	25	25	45.9	38.4	38.4	114.56	0	178.3	17427000000	111	26	28	30	19	21	22	19	21	22	36	35	40
751	B2RXT8;F8VPQ2;B2RY61;Q05CI2;Q6PE90;Q8BY40;Q8BYA2;Q8BWM4;E9Q9V1	B2RXT8;F8VPQ2;B2RY61;Q05CI2;Q6PE90		Arid4a	tr|B2RXT8|B2RXT8_MOUSE Arid4a protein OS=Mus musculus GN=Arid4a PE=2 SV=1;tr|F8VPQ2|F8VPQ2_MOUSE Protein Arid4a OS=Mus musculus GN=Arid4a PE=4 SV=1;tr|B2RY61|B2RY61_MOUSE AT rich interactive domain 4A (RBP1-like) OS=Mus musculus GN=Arid4a PE=2 SV=1;tr|Q05C	33688000	76159000	297210000	5500800	455240	1029200	4016400	107280000	73714000	257780000	6	6	6	5.5	5.5	5.5	141.87	0	9.0823	407060000	10	2	2	5	2	2	5	2	2	5	2	2	6
752	B2RXU3;Q8BH07	B2RXU3;Q8BH07	ADP-ribosylation factor-like protein 6-interacting protein 6	Arl6ip6	tr|B2RXU3|B2RXU3_MOUSE ADP-ribosylation factor-like 6 interacting protein 6 OS=Mus musculus GN=Arl6ip6 PE=2 SV=1;sp|Q8BH07|AR6P6_MOUSE ADP-ribosylation factor-like protein 6-interacting protein 6 OS=Mus musculus GN=Arl6ip6 PE=1 SV=1	2248400000	42807000	124330000	219600000	204400000	3891500	11303000	988780000	844830000	1001800000	5	5	5	29.2	29.2	29.2	24.894	0.00015006	4.4948	2415600000	6	3	3	2	3	3	2	3	3	2	2	2	2
753	B2RXV4;Q0P6A9;B2RXV4-2	B2RXV4;Q0P6A9;B2RXV4-2	Feline leukemia virus subgroup C receptor-related protein 1	Flvcr1;Mfsd7b	sp|B2RXV4|FLVC1_MOUSE Feline leukemia virus subgroup C receptor-related protein 1 OS=Mus musculus GN=Flvcr1 PE=2 SV=1;tr|Q0P6A9|Q0P6A9_MOUSE Mfsd7b protein OS=Mus musculus GN=Mfsd7b PE=2 SV=1;sp|B2RXV4-2|FLVC1_MOUSE Isoform 2 of Feline leukemia virus subgr	0	49160000	52633000	6786200	0	3277300	3508900	0	65946000	30778000	2	2	2	5.5	5.5	5.5	60.468	0.00014758	4.1577	101790000	3	0	1	2	0	1	2	0	1	2	0	1	2
754	B2RXW4;Q9R1A8	B2RXW4;Q9R1A8	E3 ubiquitin-protein ligase RFWD2	Rfwd2	tr|B2RXW4|B2RXW4_MOUSE Ring finger and WD repeat domain 2 OS=Mus musculus GN=Rfwd2 PE=2 SV=1;sp|Q9R1A8|RFWD2_MOUSE E3 ubiquitin-protein ligase RFWD2 OS=Mus musculus GN=Rfwd2 PE=1 SV=2	34306000	25544000	24489000	2279400	927190	690370	661870	33850000	26872000	30025000	3	3	3	4.5	4.5	4.5	80.47	0	7.9277	84339000	9	2	2	2	2	2	2	2	2	2	3	3	3
755	H7BX44;D3YYN8;E9PVY0;B2RXX8;Q3UU96-2;Q3UU96;F6S5Z6;F6Q5A5;F6YZJ7;F6W0C2	H7BX44;D3YYN8;E9PVY0;B2RXX8;Q3UU96-2;Q3UU96;F6S5Z6;F6Q5A5;F6YZJ7	Non-specific serine/threonine protein kinase;Serine/threonine-protein kinase MRCK alpha	Cdc42bpa	tr|H7BX44|H7BX44_MOUSE Serine/threonine-protein kinase MRCK alpha OS=Mus musculus GN=Cdc42bpa PE=4 SV=1;tr|D3YYN8|D3YYN8_MOUSE Serine/threonine-protein kinase MRCK alpha OS=Mus musculus GN=Cdc42bpa PE=4 SV=1;tr|E9PVY0|E9PVY0_MOUSE Serine/threonine-protein	418430000	146470000	249900000	9474400	4865400	1703100	2905800	350330000	224680000	286300000	16	14	14	14.3	13.1	13.1	185.78	0	36.963	814800000	22	12	9	9	10	7	8	10	7	8	9	7	6
756	B7ZWM7;E9Q4F7;B2RY01;E9Q4F8;Q6PB57;Q3UMF4;Q9CRP7	B7ZWM7;E9Q4F7;B2RY01;E9Q4F8		Ankrd11	tr|B7ZWM7|B7ZWM7_MOUSE Ankrd11 protein OS=Mus musculus GN=Ankrd11 PE=2 SV=1;tr|E9Q4F7|E9Q4F7_MOUSE Protein Ankrd11 OS=Mus musculus GN=Ankrd11 PE=4 SV=1;tr|B2RY01|B2RY01_MOUSE Ankrd11 protein OS=Mus musculus GN=Ankrd11 PE=2 SV=1;tr|E9Q4F8|E9Q4F8_MOUSE Prote	33700000	43569000	34206000	960990	290520	375590	294880	43118000	34481000	37263000	5	5	5	3.3	3.3	3.3	292.8	0	9.7938	111470000	7	2	4	3	2	4	3	2	4	3	2	4	1
757	B2RY04;Q8BK93;Q91YL4	B2RY04	Dedicator of cytokinesis protein 5	Dock5	sp|B2RY04|DOCK5_MOUSE Dedicator of cytokinesis protein 5 OS=Mus musculus GN=Dock5 PE=1 SV=2	4450500000	4480600000	4220300000	113370000	38366000	38626000	36382000	4838800000	4271800000	4925300000	53	52	52	37.7	37.2	37.2	214.43	0	286.11	13151000000	148	38	42	38	37	41	37	37	41	37	56	53	39
758	E9PUM4;B2RY15;Q71LX4;Q68FD6;Q8CDM9;Q8CHG4;Q6PB69;Q9CS79;Q3TN69;Q3TKJ2	E9PUM4;B2RY15;Q71LX4;Q68FD6;Q8CDM9;Q8CHG4	Talin-2	Tln2	tr|E9PUM4|E9PUM4_MOUSE Talin-2 OS=Mus musculus GN=Tln2 PE=1 SV=1;tr|B2RY15|B2RY15_MOUSE Tln2 protein OS=Mus musculus GN=Tln2 PE=2 SV=1;sp|Q71LX4|TLN2_MOUSE Talin-2 OS=Mus musculus GN=Tln2 PE=1 SV=3;tr|Q68FD6|Q68FD6_MOUSE Tln2 protein OS=Mus musculus GN=Tln	2449600000	2546300000	2005400000	46366000	16223000	16863000	13281000	2510400000	2529600000	2460600000	61	49	49	38.9	34.6	34.6	271.66	0	205.15	7001300000	136	49	55	45	37	43	33	37	43	33	51	47	38
759	B2RY22;E9Q6L0;E9QKH0;Q80TV8	B2RY22;E9Q6L0;E9QKH0;Q80TV8	CLIP-associating protein 1	Clasp1	tr|B2RY22|B2RY22_MOUSE Clasp1 protein OS=Mus musculus GN=Clasp1 PE=2 SV=1;tr|E9Q6L0|E9Q6L0_MOUSE CLIP-associating protein 1 OS=Mus musculus GN=Clasp1 PE=1 SV=1;tr|E9QKH0|E9QKH0_MOUSE CLIP-associating protein 1 OS=Mus musculus GN=Clasp1 PE=1 SV=1;sp|Q80TV8|	3954100000	3540100000	3494100000	110990000	39940000	35759000	35294000	3804200000	3602700000	3940000000	48	48	1	42.7	42.7	1.2	160.25	0	250.42	10988000000	124	38	38	34	38	38	34	0	1	0	42	39	43
760	B2RY27;Q8BYC6;Q3V3K3	B2RY27;Q8BYC6	Serine/threonine-protein kinase TAO3	Taok3	tr|B2RY27|B2RY27_MOUSE MCG125789, isoform CRA_a OS=Mus musculus GN=Taok3 PE=2 SV=1;sp|Q8BYC6|TAOK3_MOUSE Serine/threonine-protein kinase TAO3 OS=Mus musculus GN=Taok3 PE=1 SV=2	12163000	44187000	34716000	1821300	243260	883740	694320	28813000	53710000	30303000	3	2	2	3.5	2	2	105.36	0.00029057	3.7796	91066000	3	2	2	3	1	1	2	1	1	2	0	1	2
761	E9Q512;B2RY51;H3BJG4;Q8BVJ9;Q3UTR9;Q9CRV3;H3BJH8;Q811I5;H3BJU5	E9Q512;B2RY51;H3BJG4		Trip11	tr|E9Q512|E9Q512_MOUSE Protein Trip11 OS=Mus musculus GN=Trip11 PE=4 SV=1;tr|B2RY51|B2RY51_MOUSE Thyroid hormone receptor interactor 11 OS=Mus musculus GN=Trip11 PE=2 SV=1;tr|H3BJG4|H3BJG4_MOUSE Protein Trip11 (Fragment) OS=Mus musculus GN=Trip11 PE=4 SV=1	682580000	790470000	418390000	13510000	4875500	5646200	2988500	702570000	751710000	577550000	22	22	13	15.3	15.3	9.1	226.45	0	73.593	1891400000	48	13	17	13	13	17	13	11	10	8	15	20	13
762	B2RY56;S4R2B0;Q8BU35;S4R2A4;S4R2J1;S4R1X9;S4R2F7	B2RY56;S4R2B0	RNA-binding protein 25	Rbm25	sp|B2RY56|RBM25_MOUSE RNA-binding protein 25 OS=Mus musculus GN=Rbm25 PE=1 SV=2;tr|S4R2B0|S4R2B0_MOUSE RNA-binding protein 25 (Fragment) OS=Mus musculus GN=Rbm25 PE=1 SV=1	8972100000	7782600000	7385300000	670560000	249230000	216180000	205150000	8053700000	8200000000	8260500000	25	25	25	32.8	32.8	32.8	99.551	0	111.2	24140000000	92	20	21	17	20	21	17	20	21	17	34	30	28
763	H3BK72;B7ZWP0;H3BJZ3;B2RY59;Q5NCX5-2;Q5NCX5;Q80YV0;H9H9T3;F6WND1	H3BK72;B7ZWP0;H3BJZ3;B2RY59;Q5NCX5-2;Q5NCX5	Neuralized-like protein 4	Neurl4	tr|H3BK72|H3BK72_MOUSE Neuralized-like protein 4 OS=Mus musculus GN=Neurl4 PE=4 SV=1;tr|B7ZWP0|B7ZWP0_MOUSE Neurl4 protein OS=Mus musculus GN=Neurl4 PE=2 SV=1;tr|H3BJZ3|H3BJZ3_MOUSE Neuralized-like protein 4 OS=Mus musculus GN=Neurl4 PE=4 SV=1;tr|B2RY59|B2	136580000	153560000	4537700	4209700	1951200	2193700	64825	164630000	145020000	24218000	5	5	5	4.5	4.5	4.5	165.05	0	25.771	294680000	11	4	5	2	4	5	2	4	5	2	4	5	2
764	B2RY70;Q9D486-3;Q9D486-2;Q9D486	B2RY70;Q9D486-3;Q9D486-2;Q9D486	C-Maf-inducing protein	Cmip	tr|B2RY70|B2RY70_MOUSE 4933407C03Rik protein OS=Mus musculus GN=Cmip PE=2 SV=1;sp|Q9D486-3|CMIP_MOUSE Isoform 3 of C-Maf-inducing protein OS=Mus musculus GN=Cmip;sp|Q9D486-2|CMIP_MOUSE Isoform 2 of C-Maf-inducing protein OS=Mus musculus GN=Cmip;sp|Q9D486|C	45243000	12943000	26644000	2570600	1371000	392210	807410	32909000	27658000	28170000	2	2	2	6	6	6	82.816	0.00014658	4.022	84831000	4	2	1	1	2	1	1	2	1	1	2	1	1
765	E9Q3T3;B2RY84;L0N7N1;Q7TQJ9	E9Q3T3;B2RY84;L0N7N1;Q7TQJ9	Kinesin-like protein;Kinesin-like protein KIF14	Kif14	tr|E9Q3T3|E9Q3T3_MOUSE Protein Kif14 OS=Mus musculus GN=Kif14 PE=3 SV=1;tr|B2RY84|B2RY84_MOUSE Kif14 protein OS=Mus musculus GN=Kif14 PE=2 SV=1;tr|L0N7N1|L0N7N1_MOUSE Kinesin family member 14 OS=Mus musculus GN=Kif14 PE=1 SV=1;tr|Q7TQJ9|Q7TQJ9_MOUSE Kif14	201390000	260890000	99076000	5197700	1864700	2415600	917370	260490000	185550000	133020000	13	13	13	10.5	10.5	10.5	180.95	0	22.31	561350000	19	8	8	5	8	8	5	8	8	5	7	7	5
766	G3UVU9;B2WTI1;B2WTI2;Q9ERI5-2;Q9ERI5;F6VRF7;F6VMC4;A4FUU3;F7BDP4	G3UVU9;B2WTI1;B2WTI2;Q9ERI5-2;Q9ERI5;F6VRF7;F6VMC4;A4FUU3	Bifunctional arginine demethylase and lysyl-hydroxylase JMJD6	Jmjd6	tr|G3UVU9|G3UVU9_MOUSE Bifunctional arginine demethylase and lysyl-hydroxylase JMJD6 OS=Mus musculus GN=Jmjd6 PE=4 SV=1;tr|B2WTI1|B2WTI1_MOUSE Phosphatidylserine receptor transcript variant 1 OS=Mus musculus GN=Jmjd6 PE=2 SV=1;tr|B2WTI2|B2WTI2_MOUSE Phosph	721350000	456580000	569680000	109230000	45084000	28536000	35605000	701030000	470260000	567390000	8	8	8	45.2	45.2	45.2	32.003	0	35.62	1747600000	32	6	6	8	6	6	8	6	6	8	11	8	13
767	Q80UU5;B2X2E1;Q7TMI8;Q6PF88;F6QX82;Q80Z69;Q6PAJ6;Q5HZJ0;Q8CJ74	Q80UU5;B2X2E1;Q7TMI8;Q6PF88;F6QX82;Q80Z69;Q6PAJ6;Q5HZJ0;Q8CJ74	Ribonuclease 3	Drosha	tr|Q80UU5|Q80UU5_MOUSE Rnasen protein (Fragment) OS=Mus musculus GN=Drosha PE=2 SV=1;tr|B2X2E1|B2X2E1_MOUSE ASL1/DROSHA fusion OS=Mus musculus PE=2 SV=1;tr|Q7TMI8|Q7TMI8_MOUSE Rnasen protein (Fragment) OS=Mus musculus GN=Drosha PE=2 SV=1;tr|Q6PF88|Q6PF88_M	52690000	60125000	7250800	2728800	1197500	1366500	164790	0	38042000	27745000	6	6	6	10.1	10.1	10.1	82.083	0	9.4306	120070000	8	3	2	3	3	2	3	3	2	3	4	1	3
768	B2Z895;Q8CDS6;B2Z893;Q6GTL7;P70265;B2Z892;B2Z894	B2Z895;Q8CDS6;B2Z893;Q6GTL7;P70265;B2Z892	6-phosphofructo-2-kinase/fructose-2,6-bisphosphatase 2;6-phosphofructo-2-kinase;Fructose-2,6-bisphosphatase	Pfkfb2	tr|B2Z895|B2Z895_MOUSE 6-phosphofructo-2-kinase/fructose-2, 6-bisphosphatase 2 variant 7 OS=Mus musculus GN=Pfkfb2 PE=2 SV=1;tr|Q8CDS6|Q8CDS6_MOUSE Putative uncharacterized protein OS=Mus musculus GN=Pfkfb2 PE=2 SV=1;tr|B2Z893|B2Z893_MOUSE 6-phosphofructo-	0	47660000	0	1643400	0	1643400	0	0	45724000	0	5	2	2	12.8	5.2	5.2	42.286	0.00097806	2.9507	47660000	2	2	4	2	0	2	0	0	2	0	0	2	0
769	B2ZAC8;Q8R3L2-4;Q8R3L2-3;Q8R3L2-2;Q8R3L2-5;Q8R3L2;Q80TL2	B2ZAC8;Q8R3L2-4;Q8R3L2-3;Q8R3L2-2;Q8R3L2-5;Q8R3L2;Q80TL2	Transcription factor 25	Tcf25	tr|B2ZAC8|B2ZAC8_MOUSE Nuclear localized protein-1 isoform d (Fragment) OS=Mus musculus GN=Tcf25 PE=2 SV=1;sp|Q8R3L2-4|TCF25_MOUSE Isoform 4 of Transcription factor 25 OS=Mus musculus GN=Tcf25;sp|Q8R3L2-3|TCF25_MOUSE Isoform 3 of Transcription factor 25 OS	404150000	571030000	438990000	39283000	11226000	15862000	12194000	448600000	450950000	508810000	13	13	13	30	30	30	73.951	0	49.267	1414200000	33	8	10	9	8	10	9	8	10	9	10	12	11
770	B5B2N4;Q6P7T9;B5B2N7;B5B2N2;Q9DBQ6;Q9JHD3;Q3UME0;B5B2N5;O88942-3;O88942-2;O88942	B5B2N4;Q6P7T9;B5B2N7;B5B2N2;Q9DBQ6;Q9JHD3;Q3UME0;B5B2N5;O88942-3;O88942-2;O88942	Nuclear factor of activated T-cells, cytoplasmic 1	Nfatc1	tr|B5B2N4|B5B2N4_MOUSE Nuclear factor of activated T-cells c1 isoform IB-IXS OS=Mus musculus GN=Nfatc1 PE=2 SV=1;tr|Q6P7T9|Q6P7T9_MOUSE Nuclear factor of activated T-cells c1 isoform IA-IXS OS=Mus musculus GN=Nfatc1 PE=2 SV=1;tr|B5B2N7|B5B2N7_MOUSE Nuclear	0	109040000	35588000	3708400	0	2795900	912510	0	91441000	66259000	3	3	3	4.2	4.2	4.2	88.327	0.00015323	5.045	144630000	4	1	3	1	1	3	1	1	3	1	1	2	1
771	Q3TI69;H3BJQ3;Q3U5C5;B5T0I9;H3BKE5;E9QMH1;H3BJ44;H3BJL0;Q99J72-3;Q99J72-4;Q99J72-2;Q99J72;H3BJJ6;H3BJD1;H3BKS1;E2D881;B5T0J0;B5T0I8;B9ZZS3;E2D6P1;B9ZZS2;B5T0I7	Q3TI69;H3BJQ3;Q3U5C5;B5T0I9;H3BKE5;E9QMH1;H3BJ44;H3BJL0;Q99J72-3;Q99J72-4;Q99J72-2;Q99J72;H3BJJ6;H3BJD1	DNA dC->dU-editing enzyme APOBEC-3	Apobec3	tr|Q3TI69|Q3TI69_MOUSE DNA dC->dU-editing enzyme APOBEC-3 OS=Mus musculus GN=Apobec3 PE=2 SV=1;tr|H3BJQ3|H3BJQ3_MOUSE DNA dC->dU-editing enzyme APOBEC-3 OS=Mus musculus GN=Apobec3 PE=4 SV=1;tr|Q3U5C5|Q3U5C5_MOUSE Apolipoprotein B mRNA editing enzyme, catal	9436300	51322000	32539000	5183100	524240	2851200	1807700	0	37903000	38790000	3	3	3	13.1	13.1	13.1	35.631	0.00016023	6.2361	93297000	4	1	2	1	1	2	1	1	2	1	1	2	1
772	B5THE3	B5THE3		Sis	tr|B5THE3|B5THE3_MOUSE Sucrase-isomaltase OS=Mus musculus GN=Sis PE=2 SV=1	140500000	155480000	106460000	4327300	1510800	1671800	1144700	115600000	115000000	146430000	1	1	1	0.4	0.4	0.4	209.1	0.0078883	1.6489	402440000	6	1	1	1	1	1	1	1	1	1	2	2	2
773	B6YY24;Q3UVG3	B6YY24;Q3UVG3	Protein FAM91A1	D15Ertd621e;Fam91a1	tr|B6YY24|B6YY24_MOUSE DNA segment, Chr 15, ERATO Doi 621, expressed, isoform CRA_a OS=Mus musculus GN=D15Ertd621e PE=2 SV=1;sp|Q3UVG3|F91A1_MOUSE Protein FAM91A1 OS=Mus musculus GN=Fam91a1 PE=2 SV=1	1264500000	1112900000	1212100000	79766000	28100000	24731000	26935000	1349500000	1279500000	1196200000	19	19	19	30.9	30.9	30.9	93.462	0	66.966	3589500000	44	11	12	11	11	12	11	11	12	11	16	12	16
774	B6ZHD0;O70318;Q80UE3;Q3UNQ6;Q811B2;B6ZHC6;Q8C928;Q8CGJ6;Q7TPN6;Q8BSR4	B6ZHD0;O70318;Q80UE3;Q3UNQ6;Q811B2;B6ZHC6;Q8C928;Q8CGJ6	Band 4.1-like protein 2	Epb4.1l2;Epb41l2	tr|B6ZHD0|B6ZHD0_MOUSE Erythrocyte protein band 4.1-like 2 OS=Mus musculus GN=Epb4.1l2 PE=2 SV=1;sp|O70318|E41L2_MOUSE Band 4.1-like protein 2 OS=Mus musculus GN=Epb41l2 PE=1 SV=2;tr|Q80UE3|Q80UE3_MOUSE Protein 4.1G OS=Mus musculus GN=Epb4.1l2 PE=2 SV=1;tr	15097000000	16866000000	15844000000	746980000	235890000	263530000	247560000	14213000000	16290000000	16689000000	54	54	4	64.9	64.9	6.1	109.89	0	323.31	47807000000	241	44	50	46	44	50	46	4	4	4	74	77	90
[truncated: 7,304 more rows]
