# Supplementary material for: An efficient method for high-pH peptide fractionation based on C18 StageTips for in-depth proteome profiling
Source: Royal Society of Chemistry journal article supplement (doi:10.1039/c9ay01269a), 2019-01-01
Supplement: c9ay01269a8.xlsx [file c9ay01269a8.xlsx]

## Sheet: Sheet1
Supplementary Table S6. Comparison analysis of overlapping peptides between triplicate analysis
	Experiment 1 (Exp.1)
	Replicate 1				Replicate 2				Replicate 3				Average of replicates
	Overlap fractions	peptides	accumulated percentage (%)		Overlap fractions	peptides	accumulated percentage (%)		Overlap fractions	peptides	accumulated percentage (%)		Overlap fractions	peptides	accumulated percentage (%)
	1	18043	0.288172		1	17787	0.288091		1	19784	0.312484		1	18538	0.296249
	2	22211	0.642912		2	21178	0.631104		2	22359	0.66564		2	21916	0.646552
	3	13212	0.853926		3	13559	0.850715		3	12864	0.868824		3	13211.7	0.857822
	4	5856	0.947454		4	5786	0.944429		4	5428	0.954558		4	5690	0.948814
	5	1928	0.978247		5	2058	0.977762		5	1677	0.981046		5	1887.67	0.979018
	6	1362	1		6	1373	1		6	1200	1		6	1311.67	1
	total	62612			total	61741			total	63312			total	62555
	Experiment 2 (Exp. 2)
	Replicate 1				Replicate 2				Replicate 3				Average of replicates
	Overlap fractions	peptides	accumulated percentage (%)		Overlap fractions	peptides	accumulated percentage (%)		Overlap fractions	peptides	accumulated percentage (%)		Overlap fractions	peptides	accumulated percentage (%)
	1	25844	0.415438		1	22291	0.366852		1	24506	0.398919		1	24213.7	0.393736
	2	21042	0.753685		2	20211	0.699472		2	20945	0.739871		2	20732.7	0.731009
	3	9063	0.899371		3	10923	0.879236		3	10072	0.903827		3	10019.3	0.894145
	4	3325	0.95282		4	4006	0.945164		4	3179	0.955576		4	3503.33	0.951187
	5	1696	0.980083		5	2020	0.978408		5	1533	0.980531		5	1749.67	0.979674
	6	1239	1		6	1312	1		6	1196	1		6	1249	1
	total	62209			total	60763			total	61431			total	61467.7
	Experiment 3 (Exp.3)
	Replicate 1				Replicate 2				Replicate 3				Average of replicates
	Overlap fractions	peptides	accumulated percentage (%)		Overlap fractions	peptides	accumulated percentage (%)		Overlap fractions	peptides	accumulated percentage (%)		Overlap fractions	peptides	accumulated percentage (%)
	1	24507	0.345651		1	37434	0.496551		1	28271	0.396435		1	30070.7	0.412879
	2	26255	0.715956		2	25898	0.840081		2	29467	0.809642		2	27206.7	0.78856
	3	13092	0.900608		3	7709	0.942338		3	9038	0.936379		3	9946.33	0.926442
	4	4562	0.964951		4	2579	0.976548		4	2852	0.976372		4	3331	0.972624
	5	1597	0.987475		5	1046	0.990423		5	1011	0.990549		5	1218	0.989482
	6	888	1		6	722	1		6	674	1		6	761.333	1
	total	70901			total	75388			total	71313			total	72534
