# Supplementary material for: An efficient method for high-pH peptide fractionation based on C18 StageTips for in-depth proteome profiling
Source: Royal Society of Chemistry journal article supplement (doi:10.1039/c9ay01269a), 2019-01-01
Supplement: c9ay01269a9.xlsx [file c9ay01269a9.xlsx]

## Sheet: supplementary_table_S7
Supplementary Table S7. List of total identified protein groups in three sub-regions of mouse cerebellum. This list includes the Uniprot accession nubmer, official gene symbol, and protein name of the identified protein groups. Searh results from Maxquant are also described.
No.	Protein IDs	Majority protein IDs	Protein names	Gene names	Fasta headers	Intensity FL1	Intensity FL2	Intensity FL3	Intensity GL1	Intensity GL2	Intensity GL3	Intensity ML1	Intensity ML2	Intensity ML3	iBAQ	iBAQ FL1	iBAQ FL2	iBAQ FL3	iBAQ GL1	iBAQ GL2	iBAQ GL3	iBAQ ML1	iBAQ ML2	iBAQ ML3	LFQ intensity FL1	LFQ intensity FL2	LFQ intensity FL3	LFQ intensity GL1	LFQ intensity GL2	LFQ intensity GL3	LFQ intensity ML1	LFQ intensity ML2	LFQ intensity ML3	Peptides	Razor + unique peptides	Unique peptides	Sequence coverage [%]	Unique + razor sequence coverage [%]	Unique sequence coverage [%]	Mol. weight [kDa]	Q-value	Score	Intensity	MS/MS count	Peptides FL1	Peptides FL2	Peptides FL3	Peptides GL1	Peptides GL2
1	A0A023T672;Q9CWZ3-2;Q9CWZ3;Q9CT44	A0A023T672;Q9CWZ3-2;Q9CWZ3	RNA-binding protein 8A	RBM8;Rbm8a	tr|A0A023T672|A0A023T672_MOUSE RNA-binding protein 8A OS=Mus musculus GN=RBM8 PE=1 SV=1;sp|Q9CWZ3-2|RBM8A_MOUSE Isoform 2 of RNA-binding protein 8A OS=Mus musculus GN=Rbm8a;sp|Q9CWZ3|RBM8A_MOUSE RNA-binding protein 8A OS=Mus musculus GN=Rbm8a PE=1 SV=3	392510000	151950000	167130000	531720000	341050000	443290000	143920000	80117000	55810000	288440000	49064000	18994000	20892000	66465000	42631000	55411000	17990000	10015000	6976200	413950000	435370000	394150000	555200000	478160000	378880000	217760000	112030000	181330000	8	8	8	62.6	62.6	62.6	19.889	0	57.872	2307500000	68	7	5	7	7	6
2	A0A023T778;G3UZW7;G3UYI5;Q9CQL1	A0A023T778;G3UZW7;G3UYI5;Q9CQL1	Protein mago nashi homolog 2	Magohb	tr|A0A023T778|A0A023T778_MOUSE Mago nashi protein OS=Mus musculus GN=2010012C16Rik PE=2 SV=1;tr|G3UZW7|G3UZW7_MOUSE Protein mago nashi homolog 2 OS=Mus musculus GN=Magohb PE=4 SV=1;tr|G3UYI5|G3UYI5_MOUSE Protein mago nashi homolog 2 (Fragment) OS=Mus muscu	15175000	736630	0	1590200	4276200	1392900	682240	724380	0	1755600	1084000	52616	0	113590	305440	99490	48731	51742	0	17627000	0	0	0	0	0	0	0	0	5	1	1	39.2	6.1	6.1	17.31	0.0030712	2.2617	24578000	4	5	5	3	5	5
3	A2A9Z1;A2A9Z2;A0A023ZTV5;A0A023ZT56;Q3TWL4;Q8BHM1;C5I8Q2	A2A9Z1;A2A9Z2;A0A023ZTV5;A0A023ZT56;Q3TWL4;Q8BHM1		Dmd	tr|A2A9Z1|A2A9Z1_MOUSE Dystrophin OS=Mus musculus GN=Dmd PE=1 SV=1;tr|A2A9Z2|A2A9Z2_MOUSE Dystrophin OS=Mus musculus GN=Dmd PE=1 SV=1;tr|A0A023ZTV5|A0A023ZTV5_MOUSE Dystrophin Dp71ab OS=Mus musculus GN=Dmd PE=2 SV=1;tr|A0A023ZT56|A0A023ZT56_MOUSE Dystrophi	23369000	11927000	39313000	21490000	30560000	87812000	114660000	103040000	92164000	18080000	805820	411270	1355600	741030	1053800	3028000	3953700	3553100	3178100	0	0	140990000	0	0	119800000	85280000	122720000	160430000	18	1	1	41.6	2.2	2.2	68.926	0	9.1579	524330000	8	18	16	12	18	17
4	A0A024QYR9;O08586;Q8BSR7;Q3UUT8;Q8R5G7-3;Q8R5G7-2;Q8R5G7	A0A024QYR9;O08586;Q8BSR7	Phosphatidylinositol 3,4,5-trisphosphate 3-phosphatase and dual-specificity protein phosphatase PTEN	Pten	tr|A0A024QYR9|A0A024QYR9_MOUSE Mitochondrial PTENalpha OS=Mus musculus GN=PTEN PE=2 SV=1;sp|O08586|PTEN_MOUSE Phosphatidylinositol 3,4,5-trisphosphate 3-phosphatase and dual-specificity protein phosphatase PTEN OS=Mus musculus GN=Pten PE=1 SV=1;tr|Q8BSR7|Q	93789000	50797000	38553000	111130000	131440000	64134000	293250000	216340000	109700000	30809000	2605200	1411000	1070900	3087000	3651200	1781500	8145700	6009300	3047200	206280000	134980000	191180000	111390000	100420000	95791000	281910000	237260000	163180000	12	12	3	21.2	21.2	3.8	64.566	0	37.689	1109100000	43	7	7	7	9	6
5	A0A068BD58;A0A068BIR7;Q9Z1P7;Q3V260;G3UXN4;A0A068BFV2	A0A068BD58;A0A068BIR7;Q9Z1P7;Q3V260;G3UXN4;A0A068BFV2	KN motif and ankyrin repeat domain-containing protein 3	Kank3	tr|A0A068BD58|A0A068BD58_MOUSE Putative KN motif and ankyrin repeat domains 3 isoform 1 OS=Mus musculus GN=Kank3 PE=2 SV=1;tr|A0A068BIR7|A0A068BIR7_MOUSE KN motif and ankyrin repeat domains 3 OS=Mus musculus GN=Kank3 PE=2 SV=1;sp|Q9Z1P7|KANK3_MOUSE KN moti	1114200	5039400	3089700	2832100	17398000	5945800	9229300	10498000	6753900	1934400	34819	157480	96554	88504	543670	185810	288420	328050	211060	0	0	0	0	20487000	0	0	0	15214000	2	2	2	4.7	4.7	4.7	78.463	0	6.294	61900000	2	1	2	1	1	2
6	A0A068BES4;A0A068BFV6;A0A068BD65;A0A068BGV8;Q3TWJ1;A0A068BGT5;P28704;Q8VCR0;G3UXP8;A0A068BIV0;P28704-2;Q6LC96;Q3UMU4;A2AJP1;P28700;Q62195	A0A068BES4;A0A068BFV6;A0A068BD65;A0A068BGV8;Q3TWJ1;A0A068BGT5;P28704;Q8VCR0;G3UXP8;A0A068BIV0;P28704-2	Retinoic acid receptor RXR-beta	Rxrb	tr|A0A068BES4|A0A068BES4_MOUSE Putative retinoid X receptor beta isoform 4 OS=Mus musculus GN=Rxrb PE=2 SV=1;tr|A0A068BFV6|A0A068BFV6_MOUSE Putative retinoid X receptor beta isoform 3 OS=Mus musculus GN=Rxrb PE=2 SV=1;tr|A0A068BD65|A0A068BD65_MOUSE Putativ	10664000	5821300	3682300	7220700	18179000	10847000	3820400	1327300	366110	2381900	410170	223890	141630	277720	699190	417190	146940	51052	14081	20994000	0	17356000	10915000	27212000	25911000	10810000	0	0	5	5	3	13.6	13.6	8.4	49.844	0.00085312	3.2627	61928000	8	3	2	3	3	4
7	Q5XLB0;Q5XW54;Q5XW59;G3UX50;Q5XW53;Q3U0Z3;A1A558;A0A068BEP5;Q3UKR0;Q3UIV3;O35613;Q5XW58;Q5XW57	Q5XLB0;Q5XW54;Q5XW59;G3UX50;Q5XW53;Q3U0Z3;A1A558;A0A068BEP5;Q3UKR0;Q3UIV3;O35613;Q5XW58;Q5XW57	Death domain-associated protein 6	Daxx	tr|Q5XLB0|Q5XLB0_MOUSE Death domain-associated protein (Fragment) OS=Mus musculus GN=Daxx PE=2 SV=1;tr|Q5XW54|Q5XW54_MOUSE Death domain-associated protein (Fragment) OS=Mus musculus GN=Daxx PE=2 SV=1;tr|Q5XW59|Q5XW59_MOUSE Death-domain associated protein (	1149200	0	1744500	4365000	3735400	4752200	0	0	0	984150	71823	0	109030	272810	233460	297010	0	0	0	0	0	0	0	0	14179000	0	0	0	2	2	2	7.8	7.8	7.8	36.271	0.0052659	1.7859	15746000	3	1	0	1	2	1
8	Q78ZJ8;A0A068BFR3;P46638;G3UY29;E9Q3P9;F8WGS1;G3UZD3;Q0PD45;P62492;Q3UZ37;G3UZL4;Q9QWU0;E9Q6B3;E9PZB2;F6R2Z5;P97345;D3YYB3;Q0PD30;Q9WTL2	Q78ZJ8;A0A068BFR3;P46638;G3UY29;E9Q3P9;F8WGS1;G3UZD3;Q0PD45;P62492;Q3UZ37;G3UZL4	Ras-related protein Rab-11B;Ras-related protein Rab-11A	Rab11b;Rab11a	tr|Q78ZJ8|Q78ZJ8_MOUSE MCG22989, isoform CRA_b OS=Mus musculus GN=Rab11b PE=2 SV=1;tr|A0A068BFR3|A0A068BFR3_MOUSE RAS oncogene family protein OS=Mus musculus GN=Rab11b PE=2 SV=1;sp|P46638|RB11B_MOUSE Ras-related protein Rab-11B OS=Mus musculus GN=Rab11b PE	4318900000	2874800000	1785600000	4176100000	3421600000	2933900000	5263600000	4750000000	3387000000	2057000000	269930000	179680000	111600000	261010000	213850000	183370000	328980000	296880000	211690000	5753800000	7372400000	7540800000	5390900000	4279800000	5004400000	6400500000	6479800000	7450700000	14	14	14	62.8	62.8	62.8	24.489	0	323.31	32912000000	438	14	13	13	13	13
9	Q8R0T3;Q3UM80;A0A068BFS0;Q9Z0H1;A0A068BIU7	Q8R0T3;Q3UM80;A0A068BFS0;Q9Z0H1;A0A068BIU7	WD repeat-containing protein 46	Wdr46	tr|Q8R0T3|Q8R0T3_MOUSE Wdr46 protein (Fragment) OS=Mus musculus GN=Wdr46 PE=2 SV=1;tr|Q3UM80|Q3UM80_MOUSE Putative uncharacterized protein OS=Mus musculus GN=Wdr46 PE=2 SV=1;tr|A0A068BFS0|A0A068BFS0_MOUSE WD repeat domain 46 OS=Mus musculus GN=Wdr46 PE=2 S	239920000	91347000	97404000	98538000	162490000	0	547080000	394270000	124300000	62691000	8568700	3262400	3478700	3519200	5803200	0	19538000	14081000	4439200	0	0	0	163440000	363780000	0	368820000	411930000	0	3	3	3	7.4	7.4	7.4	55.581	0.0074298	1.5685	1755300000	12	1	1	1	2	2
10	A0A068BFS4;O35730;O35730-3;O35730-2	A0A068BFS4;O35730;O35730-3;O35730-2	E3 ubiquitin-protein ligase RING1	Ring1	tr|A0A068BFS4|A0A068BFS4_MOUSE Ring finger protein 1 OS=Mus musculus GN=Ring1 PE=2 SV=1;sp|O35730|RING1_MOUSE E3 ubiquitin-protein ligase RING1 OS=Mus musculus GN=Ring1 PE=1 SV=2;sp|O35730-3|RING1_MOUSE Isoform 3 of E3 ubiquitin-protein ligase RING1 OS=Mus	37126000	19937000	12825000	75364000	115810000	52947000	9886400	5905400	0	18322000	2062600	1107600	712510	4186900	6433600	2941500	549240	328080	0	49897000	38794000	80721000	76584000	128490000	139340000	37182000	0	0	6	4	4	23.9	16.5	16.5	42.612	0	14.713	329800000	13	6	4	3	6	6
11	A0A068BGT0;Q8C754;Q3V3A4;G3UY33;Q8C754-2;O70545	A0A068BGT0;Q8C754;Q3V3A4;G3UY33;Q8C754-2	Vacuolar protein sorting-associated protein 52 homolog	Vps52	tr|A0A068BGT0|A0A068BGT0_MOUSE Vacuolar protein sorting 52 OS=Mus musculus GN=Vps52 PE=2 SV=1;sp|Q8C754|VPS52_MOUSE Vacuolar protein sorting-associated protein 52 homolog OS=Mus musculus GN=Vps52 PE=2 SV=1;tr|Q3V3A4|Q3V3A4_MOUSE Putative uncharacterized pr	406550000	162520000	132700000	602450000	513000000	271400000	837280000	441930000	261110000	82476000	9239700	3693500	3016000	13692000	11659000	6168100	19029000	10044000	5934400	605960000	506310000	737050000	529760000	609210000	536770000	794440000	773590000	620150000	28	28	28	48.4	48.4	48.4	82.029	0	255.24	3628900000	176	22	21	15	23	23
12	Q3U9A3;Q9D679;Q3TCU5;A0A068BIS1;Q9R233-2;Q9R233;Q5XW52;Q5XW51;Q5XW48;Q5XW49;Q3TED6;Q91WI5;G3UZZ2;Q5XW46;Q8C6N4;Q3U7C1;Q5XW47	Q3U9A3;Q9D679;Q3TCU5;A0A068BIS1;Q9R233-2;Q9R233;Q5XW52;Q5XW51;Q5XW48;Q5XW49;Q3TED6;Q91WI5;G3UZZ2;Q5XW46;Q8C6N4;Q3U7C1	Tapasin	Tapbp	tr|Q3U9A3|Q3U9A3_MOUSE TAP binding protein, isoform CRA_b OS=Mus musculus GN=Tapbp PE=2 SV=1;tr|Q9D679|Q9D679_MOUSE Putative uncharacterized protein OS=Mus musculus GN=Tapbp PE=2 SV=1;tr|Q3TCU5|Q3TCU5_MOUSE Tapasin OS=Mus musculus GN=Tapbp PE=2 SV=1;tr|A0A	19941000	0	0	28845000	4566700	5456100	39321000	8389700	3519700	5001800	906410	0	0	1311100	207580	248000	1787300	381350	159990	31296000	0	0	0	0	0	0	0	0	4	4	4	15.1	15.1	15.1	49.736	0	6.2244	110040000	6	3	0	0	3	1
13	Q14C53;A0A068BIT0;Q31125	Q14C53;A0A068BIT0;Q31125	Zinc transporter SLC39A7	Slc39a7	tr|Q14C53|Q14C53_MOUSE Solute carrier family 39 (Zinc transporter), member 7 OS=Mus musculus GN=Slc39a7 PE=2 SV=1;tr|A0A068BIT0|A0A068BIT0_MOUSE Solute carrier family 39 OS=Mus musculus GN=Slc39a7 PE=2 SV=1;sp|Q31125|S39A7_MOUSE Zinc transporter SLC39A7 OS	36153000	55834000	19101000	180260000	158730000	103000000	145900000	49169000	41849000	52667000	2410200	3722300	1273400	12017000	10582000	6866800	9727000	3277900	2789900	64119000	94299000	80214000	144550000	154570000	147540000	103680000	66065000	97844000	2	2	2	7.1	7.1	7.1	50.686	0	26.685	790000000	11	2	2	2	2	2
14	A0A068EW80;Q60953-2;Q60953;F7BTZ2;D3Z3A6;D3YXR5;Q8BSJ6;D3Z2V0;O89066	A0A068EW80;Q60953-2;Q60953;F7BTZ2;D3Z3A6;D3YXR5	Protein PML	Pml	tr|A0A068EW80|A0A068EW80_MOUSE Promyelocytic leukemia OS=Mus musculus GN=Pml PE=2 SV=1;sp|Q60953-2|PML_MOUSE Isoform 2 of Protein PML OS=Mus musculus GN=Pml;sp|Q60953|PML_MOUSE Protein PML OS=Mus musculus GN=Pml PE=1 SV=3;tr|F7BTZ2|F7BTZ2_MOUSE Protein PML	41565000	19687000	8272200	207420000	169020000	39703000	41365000	8321500	8306700	11567000	884370	418870	176010	4413100	3596100	844750	880120	177050	176740	96208000	30991000	35084000	177950000	217290000	137800000	70930000	22992000	25746000	14	14	14	21.2	21.2	21.2	98.241	0	43.485	543650000	33	10	8	5	13	13
15	D3Z4T6;A0A4W9;Q80Z24;H3BKU7	D3Z4T6;A0A4W9;Q80Z24	Neuronal growth regulator 1	Negr1	tr|D3Z4T6|D3Z4T6_MOUSE Neuronal growth regulator 1 OS=Mus musculus GN=Negr1 PE=1 SV=1;tr|A0A4W9|A0A4W9_MOUSE Neuronal growth regulator 1 OS=Mus musculus GN=Negr1 PE=1 SV=1;sp|Q80Z24|NEGR1_MOUSE Neuronal growth regulator 1 OS=Mus musculus GN=Negr1 PE=1 SV=1	1947600000	1014200000	821540000	3131900000	1864200000	1014700000	3475400000	2283100000	1269800000	934580000	108200000	56347000	45641000	173990000	103560000	56372000	193080000	126840000	70543000	2962000000	3080000000	3623900000	3612500000	3358900000	3335400000	5347300000	5042700000	5449100000	14	14	14	49.8	49.8	49.8	36.208	0	215.97	16822000000	251	13	13	10	13	13
16	Q3U131;Q811C8;A0A5E1;Q3UFA6;F8WH23;E9Q5D9;Q61581	Q3U131;Q811C8;A0A5E1;Q3UFA6;F8WH23;E9Q5D9;Q61581	Insulin-like growth factor-binding protein 7	Igfbp7	tr|Q3U131|Q3U131_MOUSE Putative uncharacterized protein OS=Mus musculus GN=Igfbp7 PE=2 SV=1;tr|Q811C8|Q811C8_MOUSE Igfbp7 protein (Fragment) OS=Mus musculus GN=Igfbp7 PE=2 SV=1;tr|A0A5E1|A0A5E1_MOUSE Insulin-like growth factor binding protein 7 OS=Mus musc	0	5442200	2709200	5691700	8177900	5233400	15087000	13111000	6656100	3881800	0	340140	169330	355730	511120	327090	942940	819440	416000	0	20312000	0	0	0	0	0	0	0	1	1	1	6.7	6.7	6.7	26.427	0.00015179	4.7104	62109000	2	0	1	1	1	1
17	A0AUN0;Q4G0C0;G3X928;Q6NZC7;Q3UY74	A0AUN0;Q4G0C0;G3X928;Q6NZC7	SEC23-interacting protein	Sec23ip	tr|A0AUN0|A0AUN0_MOUSE Sec23ip protein (Fragment) OS=Mus musculus GN=Sec23ip PE=2 SV=1;tr|Q4G0C0|Q4G0C0_MOUSE Sec23 interacting protein OS=Mus musculus GN=Sec23ip PE=2 SV=1;tr|G3X928|G3X928_MOUSE SEC23-interacting protein OS=Mus musculus GN=Sec23ip PE=4 SV	290470000	128220000	108820000	357750000	827860000	207060000	262760000	180790000	93898000	51201000	6051500	2671200	2267100	7453100	17247000	4313800	5474200	3766500	1956200	411510000	422090000	485020000	486980000	462760000	505320000	383980000	336850000	332340000	23	23	23	38.1	38.1	38.1	95.116	0	81.481	2457600000	102	17	14	12	16	19
18	A0AUV1;A3KPD0;B2RVF0;A2AB79;Q8CGP6;Q8CGP7;Q8CGP5;Q8BFU2;P22752;Q8R1M2;Q61668	A0AUV1;A3KPD0;B2RVF0;A2AB79;Q8CGP6;Q8CGP7;Q8CGP5;Q8BFU2;P22752;Q8R1M2	Histone H2A;Histone H2A type 1-H;Histone H2A type 1-K;Histone H2A type 1-F;Histone H2A type 3;Histone H2A type 1;Histone H2A.J	Hist1h2ah;Hist1h2ad;Hist3h2a;Hist1h2ak;Hist1h2af;Hist1h2ab;H2afj	tr|A0AUV1|A0AUV1_MOUSE Histone H2A (Fragment) OS=Mus musculus GN=Hist1h2ah PE=2 SV=1;tr|A3KPD0|A3KPD0_MOUSE Histone H2A OS=Mus musculus GN=Hist1h2ah PE=2 SV=1;tr|B2RVF0|B2RVF0_MOUSE Histone H2A OS=Mus musculus GN=Hist1h2ad PE=2 SV=1;tr|A2AB79|A2AB79_MOUSE	149720000000	69281000000	70816000000	298990000000	134400000000	79130000000	36386000000	43787000000	27751000000	130040000000	21389000000	9897300000	10117000000	42714000000	19200000000	11304000000	5198000000	6255300000	3964400000	135150000000	144590000000	140250000000	383170000000	193480000000	248030000000	60774000000	60364000000	59276000000	9	9	1	69.3	69.3	7.9	13.819	0	311.51	910270000000	2020	8	7	6	7	9
19	A0ELI5;Q8K2D3	A0ELI5;Q8K2D3	Enhancer of mRNA-decapping protein 3	Edc3	tr|A0ELI5|A0ELI5_MOUSE Putative uncharacterized protein OS=Mus musculus GN=Edc3 PE=4 SV=1;sp|Q8K2D3|EDC3_MOUSE Enhancer of mRNA-decapping protein 3 OS=Mus musculus GN=Edc3 PE=1 SV=1	44353000	22559000	19849000	69418000	121320000	39585000	23417000	51999000	23979000	13435000	1430700	727720	640300	2239300	3913700	1276900	755380	1677400	773520	71439000	58052000	93388000	68334000	106780000	110640000	38193000	52152000	62169000	8	8	8	20.7	20.7	20.7	55.957	0	10.935	416480000	28	6	6	3	7	6
20	B0QZU2;A0JLN8;Q9CYY7	B0QZU2;A0JLN8;Q9CYY7	Protein slowmo homolog 2	Slmo2	tr|B0QZU2|B0QZU2_MOUSE Protein slowmo homolog 2 OS=Mus musculus GN=Slmo2 PE=4 SV=1;tr|A0JLN8|A0JLN8_MOUSE Slmo2 protein (Fragment) OS=Mus musculus GN=Slmo2 PE=2 SV=1;sp|Q9CYY7|SLMO2_MOUSE Protein slowmo homolog 2 OS=Mus musculus GN=Slmo2 PE=2 SV=2	19560000	6824700	0	4908700	7016300	1271000	24250000	18487000	10088000	13201000	2794300	974960	0	701250	1002300	181570	3464300	2641000	1441100	32629000	0	0	0	0	0	0	0	0	1	1	1	11.4	11.4	11.4	11.394	0.0061248	1.7102	92406000	6	1	1	0	1	1
21	A0JLQ7;Q8BFV2;Q8BNM3;E9Q1H5;E9Q5V9	A0JLQ7;Q8BFV2;Q8BNM3	PCI domain-containing protein 2	Pcid2	tr|A0JLQ7|A0JLQ7_MOUSE Pcid2 protein (Fragment) OS=Mus musculus GN=Pcid2 PE=2 SV=1;sp|Q8BFV2|PCID2_MOUSE PCI domain-containing protein 2 OS=Mus musculus GN=Pcid2 PE=2 SV=1;tr|Q8BNM3|Q8BNM3_MOUSE Putative uncharacterized protein OS=Mus musculus GN=Pcid2 PE=	84643000	93520000	42506000	341000000	220270000	106280000	135610000	113960000	62226000	40000000	2821400	3117300	1416900	11367000	7342300	3542600	4520200	3798600	2074200	206440000	233190000	227370000	284270000	258840000	230440000	121030000	176350000	167600000	15	15	15	48.5	48.5	48.5	47.018	0	47.181	1200000000	42	8	8	6	12	12
22	A0JLV3;B2RTK3;Q8CGP2;Q64525;Q64475;P10854;Q8CGP2-2;A0JNS9;Q8VEE3;G3X9D5	A0JLV3;B2RTK3;Q8CGP2;Q64525;Q64475;P10854;Q8CGP2-2;A0JNS9	Histone H2B;Histone H2B type 1-P;Histone H2B type 2-B;Histone H2B type 1-B;Histone H2B type 1-M	Hist1h2bj;Hist1h2bm;Hist1h2bp;Hist2h2bb;Hist1h2bb;Hist1h2ba	tr|A0JLV3|A0JLV3_MOUSE Histone H2B (Fragment) OS=Mus musculus GN=Hist1h2bj PE=2 SV=1;tr|B2RTK3|B2RTK3_MOUSE Histone H2B OS=Mus musculus GN=Hist1h2bm PE=2 SV=1;sp|Q8CGP2|H2B1P_MOUSE Histone H2B type 1-P OS=Mus musculus GN=Hist1h2bp PE=1 SV=3;sp|Q64525|H2B2B	112160000000	59301000000	44633000000	321510000000	121990000000	108690000000	56168000000	33093000000	23260000000	88080000000	11216000000	5930100000	4463300000	32151000000	12199000000	10869000000	5616800000	3309300000	2326000000	113280000000	120380000000	144710000000	149210000000	156430000000	204810000000	49602000000	53500000000	42384000000	13	13	1	72.4	72.4	7.3	13.579	0	323.31	880800000000	3876	12	9	11	13	13
23	A0JNY7;G3XA17;Q62448;F7CBP1;Q62448-2;Q3U9U9;Q3URI0;F6TW20	A0JNY7;G3XA17;Q62448;F7CBP1;Q62448-2;Q3U9U9	Eukaryotic translation initiation factor 4 gamma 2	Eif4g2	tr|A0JNY7|A0JNY7_MOUSE Eukaryotic translation initiation factor 4, gamma 2 OS=Mus musculus GN=Eif4g2 PE=2 SV=1;tr|G3XA17|G3XA17_MOUSE Eukaryotic translation initiation factor 4 gamma 2 OS=Mus musculus GN=Eif4g2 PE=1 SV=1;sp|Q62448|IF4G2_MOUSE Eukaryotic tr	470310000	122760000	89065000	469600000	444340000	166470000	432660000	336880000	93651000	46888000	8398400	2192100	1590400	8385700	7934700	2972800	7726000	6015700	1672300	630040000	546390000	495070000	468610000	521480000	445630000	422920000	434060000	341930000	34	34	34	44.9	44.9	44.9	102.13	0	69.014	2625700000	161	28	20	14	25	24
24	A0MNP4;Q9ERF3;Q8BVQ0;D6RDC7;D6RJ72;Q8BKW0	A0MNP4;Q9ERF3;Q8BVQ0;D6RDC7	WD repeat-containing protein 61;WD repeat-containing protein 61, N-terminally processed	Wdr61	tr|A0MNP4|A0MNP4_MOUSE CDW13/WDR61 OS=Mus musculus GN=Wdr61 PE=2 SV=1;sp|Q9ERF3|WDR61_MOUSE WD repeat-containing protein 61 OS=Mus musculus GN=Wdr61 PE=2 SV=1;tr|Q8BVQ0|Q8BVQ0_MOUSE WD repeat-containing protein 61 OS=Mus musculus GN=Wdr61 PE=2 SV=1;tr|D6RD	301900000	73692000	30990000	453770000	413510000	200450000	114870000	105490000	60746000	117030000	20127000	4912800	2066000	30251000	27568000	13364000	7658300	7032700	4049800	407710000	254470000	263360000	461380000	494680000	463390000	196020000	252330000	272400000	13	13	13	62.6	62.6	62.6	33.772	0	67.307	1755400000	78	11	10	6	11	12
25	A0PCF8;Q8C1W1;Q0VGS1	A0PCF8;Q8C1W1;Q0VGS1	Vasohibin-1	Vash1	tr|A0PCF8|A0PCF8_MOUSE Vasohibin 1 OS=Mus musculus GN=Vash1 PE=2 SV=1;sp|Q8C1W1|VASH1_MOUSE Vasohibin-1 OS=Mus musculus GN=Vash1 PE=2 SV=4;tr|Q0VGS1|Q0VGS1_MOUSE Vasohibin 1 OS=Mus musculus GN=Vash1 PE=2 SV=1	5753600	4450700	1630600	0	2285500	3790100	30326000	14447000	13049000	3029300	230140	178030	65223	0	91421	151610	1213000	577870	521940	0	17746000	0	0	0	0	14901000	27584000	33852000	2	2	2	13.6	13.6	13.6	41.844	0.0017772	2.5938	75731000	7	1	1	1	0	1
26	A0PJ63;G5E8V8;Q9JJT9;F6RPD4	A0PJ63;G5E8V8;Q9JJT9;F6RPD4	Phosphorylated adapter RNA export protein	Phax	tr|A0PJ63|A0PJ63_MOUSE Phax protein (Fragment) OS=Mus musculus GN=Phax PE=2 SV=1;tr|G5E8V8|G5E8V8_MOUSE Phosphorylated adapter RNA export protein OS=Mus musculus GN=Phax PE=1 SV=1;sp|Q9JJT9|PHAX_MOUSE Phosphorylated adapter RNA export protein OS=Mus muscul	22059000	8878600	462960	34603000	66337000	22408000	7811700	2389200	254160	9178000	1225500	493260	25720	1922400	3685400	1244900	433980	132740	14120	27774000	38112000	0	57081000	57156000	74154000	0	0	0	4	4	4	17.4	17.4	17.4	34.964	0.00015319	4.8968	165200000	9	4	3	1	2	3
27	A0PJL3;Q6PDS3;Q6PDS3-3;Q6PDS3-2;Q6PDS3-4	A0PJL3;Q6PDS3;Q6PDS3-3;Q6PDS3-2	Sterile alpha and TIR motif-containing protein 1	Sarm1	tr|A0PJL3|A0PJL3_MOUSE Sarm1 protein (Fragment) OS=Mus musculus GN=Sarm1 PE=2 SV=1;sp|Q6PDS3|SARM1_MOUSE Sterile alpha and TIR motif-containing protein 1 OS=Mus musculus GN=Sarm1 PE=1 SV=1;sp|Q6PDS3-3|SARM1_MOUSE Isoform 3 of Sterile alpha and TIR motif-co	473770000	222830000	110190000	482230000	379780000	198440000	679400000	467520000	280010000	70089000	10080000	4741200	2344400	10260000	8080400	4222100	14455000	9947200	5957700	585600000	626200000	602920000	493620000	465460000	473510000	643760000	653110000	744050000	29	29	29	51.1	51.1	51.1	77.295	0	167.39	3294200000	173	26	24	17	24	23
28	Q497V8;B8JJ66;A0PJN6;B8JJ69;Q3TA61;Q3UM69;F6X1P1;Q6PDX4;F6W3U3;B8JJ67	Q497V8;B8JJ66;A0PJN6;B8JJ69;Q3TA61;Q3UM69;F6X1P1;Q6PDX4;F6W3U3		2310061I04Rik	tr|Q497V8|Q497V8_MOUSE 2310061I04Rik protein OS=Mus musculus GN=2310061I04Rik PE=2 SV=1;tr|B8JJ66|B8JJ66_MOUSE MCG141136, isoform CRA_a OS=Mus musculus GN=2310061I04Rik PE=4 SV=1;tr|A0PJN6|A0PJN6_MOUSE 2310061I04Rik protein (Fragment) OS=Mus musculus GN=23	312810000	102590000	100690000	377860000	382930000	165240000	478060000	364090000	206850000	226460000	28438000	9326200	9153200	34351000	34812000	15021000	43460000	33099000	18805000	369410000	267530000	529590000	406690000	465140000	328050000	587010000	570070000	684410000	8	8	8	39	39	39	20.471	0	52.032	2491100000	72	8	7	4	7	6
29	A0PK78;Q78PG9	A0PK78;Q78PG9	Coiled-coil domain-containing protein 25	Ccdc25	tr|A0PK78|A0PK78_MOUSE Coiled-coil domain containing 25 OS=Mus musculus GN=Ccdc25 PE=2 SV=1;sp|Q78PG9|CCD25_MOUSE Coiled-coil domain-containing protein 25 OS=Mus musculus GN=Ccdc25 PE=1 SV=1	9918600	8062400	0	14641000	10485000	12429000	47607000	24705000	20438000	9267900	619910	503900	0	915050	655340	776840	2975400	1544000	1277400	0	0	0	17971000	0	20430000	41366000	21929000	67358000	4	4	4	21.6	21.6	21.6	24.48	0	6.1955	148290000	11	1	1	0	3	1
30	B7ZN52;F6TFN2;F6VG99;E9PYF4;A0T1J8;E9PYI7;Q6ZQ32	B7ZN52;F6TFN2;F6VG99;E9PYF4;A0T1J8;E9PYI7;Q6ZQ32		Lmo7	tr|B7ZN52|B7ZN52_MOUSE Lmo7 protein OS=Mus musculus GN=Lmo7 PE=2 SV=1;tr|F6TFN2|F6TFN2_MOUSE Protein Lmo7 (Fragment) OS=Mus musculus GN=Lmo7 PE=1 SV=1;tr|F6VG99|F6VG99_MOUSE Protein Lmo7 (Fragment) OS=Mus musculus GN=Lmo7 PE=1 SV=1;tr|E9PYF4|E9PYF4_MOUSE P	5400000	5935300	4011100	12496000	21334000	1632700	43773000	30453000	16650000	1840100	70130	77082	52092	162290	277070	21204	568490	395490	216230	13721000	0	0	13807000	21460000	0	30104000	50436000	33295000	5	5	5	5.3	5.3	5.3	130.7	0	23.754	141690000	11	1	3	2	2	3
31	A2A8Y5;A0ZV96;Q8BHW2	A2A8Y5;A0ZV96;Q8BHW2	Protein OSCP1	Oscp1	tr|A2A8Y5|A2A8Y5_MOUSE Organic solute carrier 1 (Fragment) OS=Mus musculus GN=Oscp1 PE=2 SV=1;tr|A0ZV96|A0ZV96_MOUSE Organic solute carrier protein 1 isoform OS=Mus musculus GN=Oscp1 PE=2 SV=1;sp|Q8BHW2|OSCP1_MOUSE Protein OSCP1 OS=Mus musculus GN=Oscp1 PE	84512000	57462000	31323000	74692000	115590000	71779000	117480000	66298000	46539000	22189000	2817100	1915400	1044100	2489700	3853100	2392600	3915800	2209900	1551300	116670000	193140000	154010000	71542000	86420000	150820000	85611000	77755000	134960000	8	8	8	24.8	24.8	24.8	43.231	0	18.141	665670000	35	6	6	5	8	7
32	E9QAE3;A0ZVB6;Q52KH4;Q8BTS9	E9QAE3;A0ZVB6		Btaf1	tr|E9QAE3|E9QAE3_MOUSE Protein Btaf1 OS=Mus musculus GN=Btaf1 PE=4 SV=1;tr|A0ZVB6|A0ZVB6_MOUSE TBP-associated factor 170 OS=Mus musculus GN=Btaf1 PE=2 SV=1	165540000	121600000	85436000	503640000	264010000	250600000	18258000	222430000	230800000	18623000	1655400	1216000	854360	5036400	2640100	2506000	182580	2224300	2308000	501530000	784500000	529620000	533890000	808530000	862050000	387820000	515750000	674850000	9	9	9	6.2	6.2	6.2	207.05	0	11.833	1862300000	30	6	4	3	5	6
33	A1A4T2;Q8BHN3-2;Q8BHN3;Q3UE86;Q8BHN3-3;Q9R1N7;REV__D6REU9;REV__Q5ERC7;REV__B9EHN5;REV__B7ZNE4;REV__Q7TSP0;REV__Q3T9X0	A1A4T2;Q8BHN3-2;Q8BHN3;Q3UE86;Q8BHN3-3	Neutral alpha-glucosidase AB	Ganab	tr|A1A4T2|A1A4T2_MOUSE Alpha glucosidase 2 alpha neutral subunit OS=Mus musculus GN=Ganab PE=2 SV=1;sp|Q8BHN3-2|GANAB_MOUSE Isoform 2 of Neutral alpha-glucosidase AB OS=Mus musculus GN=Ganab;sp|Q8BHN3|GANAB_MOUSE Neutral alpha-glucosidase AB OS=Mus musculu	3286200000	1439000000	1125400000	3885100000	4211900000	2314700000	4537800000	2604400000	1984000000	437730000	56659000	24810000	19403000	66984000	72619000	39909000	78237000	44903000	34207000	5091700000	4342300000	4632700000	4841200000	4692400000	4574200000	5215800000	4121700000	4224900000	51	51	51	59.8	59.8	59.8	109.4	0	323.31	25388000000	764	47	43	38	49	48
34	A1A553;Q5DTS2;O55098;Q3UG53	A1A553;Q5DTS2;O55098;Q3UG53	Serine/threonine-protein kinase 10	Stk10	tr|A1A553|A1A553_MOUSE Serine/threonine kinase 10 OS=Mus musculus GN=Stk10 PE=2 SV=1;tr|Q5DTS2|Q5DTS2_MOUSE MKIAA4026 protein (Fragment) OS=Mus musculus GN=Stk10 PE=2 SV=1;sp|O55098|STK10_MOUSE Serine/threonine-protein kinase 10 OS=Mus musculus GN=Stk10 PE	30007000	16077000	7378100	27049000	12248000	9318000	99861000	44933000	12896000	4901300	566180	303330	139210	510360	231100	175810	1884200	847790	243330	25654000	0	0	27819000	0	21325000	94196000	0	0	6	4	4	7	5	5	111.94	0	10.959	259770000	9	4	3	2	3	3
35	A1A596;Q8R538;Q2M1K2;Q8BU03;Q8K2C4	A1A596;Q8R538;Q2M1K2;Q8BU03	Periodic tryptophan protein 2 homolog	Pwp2	tr|A1A596|A1A596_MOUSE Pwp2 protein OS=Mus musculus GN=Pwp2 PE=2 SV=1;tr|Q8R538|Q8R538_MOUSE WD-repeat protein p103 OS=Mus musculus GN=Pwp2 PE=2 SV=1;tr|Q2M1K2|Q2M1K2_MOUSE MCG115350 OS=Mus musculus GN=Pwp2 PE=2 SV=1;sp|Q8BU03|PWP2_MOUSE Periodic tryptopha	1723100	4969400	2496100	20225000	12670000	6079300	0	3515500	0	1201800	40072	115570	58048	470340	294650	141380	0	81756	0	0	0	0	15873000	0	8431400	0	0	0	4	4	4	6.3	6.3	6.3	98.57	0.0012733	3.193	51678000	7	1	2	2	3	3
36	A1BN54;D3YY95;Q9CTH3;Q3UYE4	A1BN54		Actn1	tr|A1BN54|A1BN54_MOUSE Alpha actinin 1a OS=Mus musculus GN=Actn1 PE=2 SV=1	7805300	12609000	4353800	83692000	33043000	9182200	37143000	28128000	9857000	3893300	134570	217400	75065	1443000	569710	158310	640400	484960	169950	0	0	0	0	0	0	35225000	41395000	0	52	1	1	67.5	1.9	1.9	102.72	0	5.1521	225810000	15	46	42	38	44	43
37	Q7TSW1;A1E2H8;Q9EQW9;Q4FJL9;O70200	Q7TSW1;A1E2H8;Q9EQW9;Q4FJL9;O70200	Allograft inflammatory factor 1	Aif-1;Aif1;iba1	tr|Q7TSW1|Q7TSW1_MOUSE Allograft inflammatory factor 1 (Fragment) OS=Mus musculus GN=Aif-1 PE=4 SV=1;tr|A1E2H8|A1E2H8_MOUSE Ionized calcium binding adapter molecule 1 (Fragment) OS=Mus musculus GN=Aif1 PE=2 SV=1;tr|Q9EQW9|Q9EQW9_MOUSE Ionized calcium bindi	4145400	1645100	0	2884200	2237800	4127500	0	0	0	3008000	829090	329010	0	576840	447570	825490	0	0	0	0	0	0	0	0	4874400	0	0	0	1	1	1	22.1	22.1	22.1	8.9395	0.0062143	1.6485	15040000	2	1	1	0	1	1
38	Q9DAS3;A1E5T5;P51807;Q5EBK8;Q9CT63	Q9DAS3;A1E5T5;P51807;Q5EBK8	Dynein light chain Tctex-type 1	Dynlt1	tr|Q9DAS3|Q9DAS3_MOUSE Putative uncharacterized protein OS=Mus musculus PE=2 SV=1;tr|A1E5T5|A1E5T5_MOUSE Tctex-1 OS=Mus musculus PE=2 SV=1;sp|P51807|DYLT1_MOUSE Dynein light chain Tctex-type 1 OS=Mus musculus GN=Dynlt1 PE=1 SV=1;tr|Q5EBK8|Q5EBK8_MOUSE Dynl	108270000	61360000	24983000	58050000	174330000	168930000	67954000	68559000	44723000	129530000	18044000	10227000	4163800	9675000	29055000	28155000	11326000	11426000	7453800	99758000	131150000	106120000	51300000	159040000	243670000	208790000	164750000	134530000	3	3	3	41.5	41.5	41.5	11.625	0	68.157	777150000	34	3	3	3	3	3
39	A1ILG8;Q8BX70-3;Q8BX70;Q8BX70-2;A1ILH0;A1ILG9;A1ILH1;A1ILH3;A1ILH2;A1ILH4	A1ILG8;Q8BX70-3;Q8BX70;Q8BX70-2	Vacuolar protein sorting-associated protein 13C	Vps13c	tr|A1ILG8|A1ILG8_MOUSE Chorein OS=Mus musculus GN=Vps13c PE=2 SV=1;sp|Q8BX70-3|VP13C_MOUSE Isoform 3 of Vacuolar protein sorting-associated protein 13C OS=Mus musculus GN=Vps13c;sp|Q8BX70|VP13C_MOUSE Vacuolar protein sorting-associated protein 13C OS=Mus m	1725100000	573260000	347720000	1494200000	1272000000	564520000	3812100000	2260300000	1019200000	59947000	7913200	2629700	1595000	6854200	5834800	2589500	17487000	10368000	4675100	2346500000	2265200000	2284100000	1877900000	1604200000	1496800000	3325200000	3112900000	2986400000	119	119	118	41.9	41.9	41.9	420.08	0	323.31	13068000000	547	85	74	52	86	85
40	A1ILI2	A1ILI2		Vps13a	tr|A1ILI2|A1ILI2_MOUSE Putative uncharacterized protein Vps13a 3 variant II (Fragment) OS=Mus musculus GN=Vps13a PE=2 SV=1	0	2321600	0	3174100	0	0	5723200	7246400	0	2051700	0	257960	0	352680	0	0	635910	805160	0	0	0	0	0	0	0	0	8372200	0	5	1	1	38.8	10.2	10.2	15.972	0.0030532	2.1859	18465000	1	3	5	3	5	3
41	O54848;E9Q3E3;A1KR23;P48168	O54848;E9Q3E3;A1KR23;P48168	Glycine receptor subunit beta	Glrb	tr|O54848|O54848_MOUSE Glycine receptor beta-subunit (Fragment) OS=Mus musculus PE=4 SV=1;tr|E9Q3E3|E9Q3E3_MOUSE Glycine receptor subunit beta OS=Mus musculus GN=Glrb PE=3 SV=1;tr|A1KR23|A1KR23_MOUSE Glycine receptor beta subunit OS=Mus musculus GN=Glrb PE	4175200	0	0	11164000	3864000	3619000	0	0	0	3803700	695870	0	0	1860700	644000	603160	0	0	0	0	0	0	16589000	0	0	0	0	0	2	2	2	28.4	28.4	28.4	9.4798	0.0013854	2.8061	22822000	4	1	0	0	2	1
42	A1L013;Q9CS00	A1L013;Q9CS00	Cactin	Cactin	tr|A1L013|A1L013_MOUSE Cactin OS=Mus musculus GN=Cactin PE=2 SV=1;sp|Q9CS00|CATIN_MOUSE Cactin OS=Mus musculus GN=Cactin PE=1 SV=2	3789100	4944500	2057400	11311000	17846000	11842000	0	1438700	1436100	1518500	105250	137350	57150	314200	495720	328940	0	39964	39891	0	17237000	0	23799000	25234000	28676000	0	0	0	3	3	3	5.7	5.7	5.7	90.66	0	5.1501	54665000	8	1	2	1	2	3
43	A1L0U2;A2VCR8;A2A4Q3;Q9QYM5;Q8C6C0	A1L0U2;A2VCR8;A2A4Q3;Q9QYM5;Q8C6C0	Rho-related GTP-binding protein RhoN	Rnd2	tr|A1L0U2|A1L0U2_MOUSE Rnd2 protein (Fragment) OS=Mus musculus GN=Rnd2 PE=2 SV=1;tr|A2VCR8|A2VCR8_MOUSE Rnd2 protein (Fragment) OS=Mus musculus GN=Rnd2 PE=2 SV=1;tr|A2A4Q3|A2A4Q3_MOUSE Rho family GTPase 2 OS=Mus musculus GN=Rnd2 PE=2 SV=1;sp|Q9QYM5|RND2_MO	19223000	3786700	2009900	21919000	8190300	1947500	17191000	7638600	4922200	6202000	1373100	270480	143560	1565700	585020	139110	1227900	545610	351590	23282000	14065000	11234000	13687000	11154000	0	13445000	13074000	0	3	3	3	16	16	16	25.138	0.0017794	2.6084	86828000	6	3	2	2	3	2
44	A1L0U3;B9EI85;P84228;F8WI35;E0CYR7;E0CYN1	A1L0U3;B9EI85;P84228;F8WI35	Histone H3;Histone H3.2	Hist1h3e;Hist2h3b;Hist1h3b;H3f3a	tr|A1L0U3|A1L0U3_MOUSE Histone H3 (Fragment) OS=Mus musculus GN=Hist1h3e PE=2 SV=1;tr|B9EI85|B9EI85_MOUSE Histone H3 OS=Mus musculus GN=Hist2h3b PE=2 SV=1;sp|P84228|H32_MOUSE Histone H3.2 OS=Mus musculus GN=Hist1h3b PE=1 SV=2;tr|F8WI35|F8WI35_MOUSE Histone	166900000	17304000	88976000	12310000000	13978000000	37528000000	73367000	62761000	9758300	10706000000	27817000	2884000	14829000	2051600000	2329700000	6254700000	12228000	10460000	1626400	17212000	12176000	31808000	4264700000	15904000000	33595000000	13783000	15571000	3110900	17	1	1	66.9	24.1	24.1	15.029	0	147.91	64236000000	294	15	14	14	16	16
45	A1L0U6;A2AS98;P28660;P28660-2	A1L0U6;A2AS98;P28660;P28660-2	Nck-associated protein 1	Nckap1	tr|A1L0U6|A1L0U6_MOUSE Nckap1 protein (Fragment) OS=Mus musculus GN=Nckap1 PE=2 SV=1;tr|A2AS98|A2AS98_MOUSE Nck-associated protein 1 OS=Mus musculus GN=Nckap1 PE=4 SV=1;sp|P28660|NCKP1_MOUSE Nck-associated protein 1 OS=Mus musculus GN=Nckap1 PE=1 SV=2;sp|P	5457200000	2437700000	1433100000	6243400000	5438400000	2372500000	13101000000	8430600000	4347400000	757870000	83957000	37503000	22047000	96052000	83668000	36500000	201560000	129700000	66883000	8481200000	7609200000	6049800000	6333800000	6423200000	5779300000	13155000000	11970000000	9788700000	64	64	62	58.8	58.8	57.4	129.38	0	323.31	49261000000	1021	59	57	48	60	57
46	A1L0V4;P68433	A1L0V4;P68433	Histone H3;Histone H3.1	Hist1h3i;Hist1h3a	tr|A1L0V4|A1L0V4_MOUSE Histone H3 (Fragment) OS=Mus musculus GN=Hist1h3i PE=2 SV=1;sp|P68433|H31_MOUSE Histone H3.1 OS=Mus musculus GN=Hist1h3a PE=1 SV=2	24034000	16112000	12100000	6389900000	6996700000	6412400000	11285000	49431000	29379000	3323500000	4005700	2685300	2016700	1065000000	1166100000	1068700000	1880800	8238600	4896400	6760000	16015000	10690000	4431000000	6525300000	5425300000	4754700	74304000	10649000	17	1	1	65.9	23.7	23.7	15.273	0	98.699	19941000000	200	15	14	14	16	16
47	Q3TEK4;A4QMY9;A1L0V7;Q4V9T7;Q3TDK9;Q99K95	Q3TEK4;A4QMY9;A1L0V7;Q4V9T7;Q3TDK9;Q99K95	Protein RTF2 homolog	Rtfdc1	tr|Q3TEK4|Q3TEK4_MOUSE Putative uncharacterized protein OS=Mus musculus GN=Rtfdc1 PE=2 SV=1;tr|A4QMY9|A4QMY9_MOUSE 2410001C21Rik protein (Fragment) OS=Mus musculus GN=Rtfdc1 PE=2 SV=1;tr|A1L0V7|A1L0V7_MOUSE 2410001C21Rik protein (Fragment) OS=Mus musculus	11294000	3022500	5054400	11676000	12589000	14742000	0	0	0	3434000	664380	177790	297320	686820	740540	867160	0	0	0	0	8376000	12905000	11149000	14275000	18615000	0	0	0	2	2	2	11.9	11.9	11.9	27.981	0.0013957	2.9438	58378000	5	1	2	2	2	2
48	A1L151;Q99JG2	A1L151;Q99JG2	Prosaposin receptor GPR37L1	Gpr37l1	tr|A1L151|A1L151_MOUSE G protein-coupled receptor 37-like 1 OS=Mus musculus GN=Gpr37l1 PE=2 SV=1;sp|Q99JG2|ETBR2_MOUSE Prosaposin receptor GPR37L1 OS=Mus musculus GN=Gpr37l1 PE=2 SV=2	4291600000	1784200000	1236000000	1267000000	1608900000	769070000	8192500000	5862400000	3538700000	2595500000	390150000	162200000	112370000	115180000	146260000	69916000	744770000	532940000	321700000	5035100000	5500000000	4706700000	1373000000	1690200000	1614900000	11166000000	9806600000	8027100000	10	10	10	35.6	35.6	35.6	38.32	0	316.17	28550000000	308	9	9	8	10	9
49	A1L2Z0;Q920F6;Q8BZI2;Q6WIZ7	A1L2Z0;Q920F6;Q8BZI2;Q6WIZ7	Structural maintenance of chromosomes protein;Structural maintenance of chromosomes protein 1B	Smc1b;Svs1	tr|A1L2Z0|A1L2Z0_MOUSE Structural maintenance of chromosomes protein OS=Mus musculus GN=Smc1b PE=2 SV=1;sp|Q920F6|SMC1B_MOUSE Structural maintenance of chromosomes protein 1B OS=Mus musculus GN=Smc1b PE=1 SV=1;tr|Q8BZI2|Q8BZI2_MOUSE Putative uncharacterize	17720000	4554000	0	17924000	38106000	20854000	0	0	2875300	1214700	210950	54215	0	213380	453650	248260	0	0	34230	0	12720000	0	0	0	0	0	0	0	2	2	2	0.6	0.6	0.6	144.51	0.0017767	2.5914	102030000	5	1	1	0	2	1
50	A1L2Z3;Q8C7X2;Z4YJW0;Q8C7X2-3	A1L2Z3;Q8C7X2;Z4YJW0	ER membrane protein complex subunit 1	Emc1	tr|A1L2Z3|A1L2Z3_MOUSE C230096C10Rik protein OS=Mus musculus GN=Emc1 PE=2 SV=1;sp|Q8C7X2|EMC1_MOUSE ER membrane protein complex subunit 1 OS=Mus musculus GN=Emc1 PE=1 SV=1;tr|Z4YJW0|Z4YJW0_MOUSE ER membrane protein complex subunit 1 OS=Mus musculus GN=Emc1	1388800000	808340000	511710000	2072300000	2077900000	1051400000	2072500000	1126200000	609510000	225360000	26708000	15545000	9840700	39852000	39960000	20218000	39856000	21657000	11721000	2086800000	2248600000	2258900000	2469000000	2843200000	2769800000	2324600000	2313200000	2166300000	37	37	1	46	46	1.3	111.63	0	323.31	11719000000	351	32	31	27	35	32
51	A1L333;Q9CSD9;B1ARB8;S4R1E3;Q921Y3	A1L333		Ddx5	tr|A1L333|A1L333_MOUSE DEAD (Asp-Glu-Ala-Asp) box polypeptide 5 OS=Mus musculus GN=Ddx5 PE=2 SV=1	0	3846900	0	7038600	9998500	0	0	0	0	580110	0	106860	0	195520	277740	0	0	0	0	0	16569000	0	0	0	0	0	0	0	43	1	1	59.8	2.6	2.6	69.279	0.0014055	3.0725	20884000	1	41	40	34	41	41
52	A1L338;Q3UGX8;Q3UHC1;Q91ZZ2;E0CXV1;Q8C5V7;F6ZDE5	A1L338;Q3UGX8;Q3UHC1;Q91ZZ2;E0CXV1		Rapgef1	tr|A1L338|A1L338_MOUSE Rapgef1 protein OS=Mus musculus GN=Rapgef1 PE=2 SV=1;tr|Q3UGX8|Q3UGX8_MOUSE Protein Rapgef1 OS=Mus musculus GN=Rapgef1 PE=1 SV=1;tr|Q3UHC1|Q3UHC1_MOUSE Protein Rapgef1 OS=Mus musculus GN=Rapgef1 PE=1 SV=1;tr|Q91ZZ2|Q91ZZ2_MOUSE Guani	87840000	45071000	23282000	93399000	99514000	38165000	126690000	109770000	38958000	11426000	1514500	777090	401420	1610300	1715800	658020	2184300	1892600	671680	109230000	140900000	164230000	102330000	105390000	95523000	163780000	182930000	173640000	14	14	14	14.9	14.9	14.9	132.02	0	37.79	662690000	52	10	9	5	7	8
53	A1L341;A9C475;Q61214;Q8K006;Q8C774;Q9Z188-2;A9C478;A9C477;Q61158;Q80ZK5;Q5U4C9	A1L341;A9C475;Q61214;Q8K006	Dual specificity tyrosine-phosphorylation-regulated kinase 1A	Dyrk1a	tr|A1L341|A1L341_MOUSE Dual-specificity tyrosine-phosphorylation-regulated kinase 1A OS=Mus musculus GN=Dyrk1a PE=1 SV=1;tr|A9C475|A9C475_MOUSE Dual-specificity tyrosine-(Y)-phosphorylation regulated kinase 1a OS=Mus musculus GN=Dyrk1a PE=2 SV=1;sp|Q61214|	117440000	130420000	65596000	178360000	214190000	93312000	323950000	230320000	114640000	45882000	3669800	4075700	2049900	5573700	6693600	2916000	10123000	7197500	3582500	233080000	399320000	341950000	259190000	248050000	277840000	422550000	410010000	346630000	20	20	12	28.5	28.5	19.4	84.466	0	52.046	1468200000	77	13	17	11	16	15
54	B2CSK2;A1L347;P16627;Q9QWU1;Q91ZU4;Q91ZU5;Q9R2A1	B2CSK2;A1L347;P16627;Q9QWU1;Q91ZU4	Heat shock 70 kDa protein 1-like	Hspa1l;Hsc70t	tr|B2CSK2|B2CSK2_MOUSE Heat shock protein 1-like protein OS=Mus musculus PE=3 SV=1;tr|A1L347|A1L347_MOUSE Heat shock protein 1-like OS=Mus musculus GN=Hspa1l PE=2 SV=1;sp|P16627|HS71L_MOUSE Heat shock 70 kDa protein 1-like OS=Mus musculus GN=Hspa1l PE=2 SV	8716000	4306700	0	10370000	13305000	0	16652000	16321000	0	1741800	217900	107670	0	259250	332620	0	416300	408020	0	0	0	0	0	0	0	0	24871000	0	15	1	1	25.6	2.3	2.3	70.606	0.0014006	3.0086	69671000	1	14	13	12	14	14
55	Q3TDZ5;Q3UXJ2;A1L354;A1L353;P82198;Q3TAY9;Q3UBG4;Q19PV3	Q3TDZ5;Q3UXJ2;A1L354;A1L353;P82198;Q3TAY9;Q3UBG4	Transforming growth factor-beta-induced protein ig-h3	Tgfbi	tr|Q3TDZ5|Q3TDZ5_MOUSE Putative uncharacterized protein (Fragment) OS=Mus musculus GN=Tgfbi PE=2 SV=1;tr|Q3UXJ2|Q3UXJ2_MOUSE Putative uncharacterized protein OS=Mus musculus GN=Tgfbi PE=2 SV=1;tr|A1L354|A1L354_MOUSE Transforming growth factor, beta induced	16916000	9051100	3850700	7040400	2040300	2107100	7655300	5580900	4578500	1838100	528620	282850	120330	220010	63758	65847	239230	174400	143080	20723000	22477000	0	0	0	0	0	0	0	4	4	4	9	9	9	58.439	0.0015229	2.7935	58820000	4	3	2	2	1	1
56	A1L361;Q9WUN2;Q3THP3	A1L361;Q9WUN2;Q3THP3	Serine/threonine-protein kinase TBK1	Tbk1	tr|A1L361|A1L361_MOUSE TANK-binding kinase 1 OS=Mus musculus GN=Tbk1 PE=2 SV=1;sp|Q9WUN2|TBK1_MOUSE Serine/threonine-protein kinase TBK1 OS=Mus musculus GN=Tbk1 PE=1 SV=1;tr|Q3THP3|Q3THP3_MOUSE Putative uncharacterized protein OS=Mus musculus GN=Tbk1 PE=2	129740000	44845000	8723700	73028000	83028000	17094000	163690000	149700000	57097000	16522000	2948600	1019200	198270	1659700	1887000	388500	3720200	3402400	1297600	102160000	103670000	81703000	70657000	113660000	79345000	159390000	159050000	164030000	14	14	14	24.8	24.8	24.8	83.424	0	36.097	726950000	51	8	7	3	8	6
57	A1L3B6;Q9D7Z3;Q9D7Z3-2	A1L3B6;Q9D7Z3;Q9D7Z3-2	Nucleolar protein 7	Nol7	tr|A1L3B6|A1L3B6_MOUSE Nol7 protein OS=Mus musculus GN=Nol7 PE=2 SV=1;sp|Q9D7Z3|NOL7_MOUSE Nucleolar protein 7 OS=Mus musculus GN=Nol7 PE=1 SV=1;sp|Q9D7Z3-2|NOL7_MOUSE Isoform 2 of Nucleolar protein 7 OS=Mus musculus GN=Nol7	35436000	7793500	6822800	89165000	66158000	29540000	2650800	0	2568400	30017000	4429500	974190	852850	11146000	8269700	3692600	331350	0	321050	34389000	29857000	30569000	72965000	58015000	84709000	0	0	0	5	5	5	21.7	21.7	21.7	28.97	0	11.173	240140000	13	3	3	3	5	3
58	A1L3B8;P26516	A1L3B8;P26516	26S proteasome non-ATPase regulatory subunit 7	Psmd7	tr|A1L3B8|A1L3B8_MOUSE Proteasome (Prosome, macropain) 26S subunit, non-ATPase, 7 OS=Mus musculus GN=Psmd7 PE=2 SV=1;sp|P26516|PSMD7_MOUSE 26S proteasome non-ATPase regulatory subunit 7 OS=Mus musculus GN=Psmd7 PE=1 SV=2	564670000	261270000	151650000	619360000	562640000	311480000	536440000	504000000	281790000	252890000	37645000	17418000	10110000	41291000	37509000	20765000	35763000	33600000	18786000	872390000	704340000	892940000	747280000	803360000	611880000	627190000	642960000	555420000	14	14	14	60.7	60.7	60.7	36.539	0	141.36	3793300000	169	13	12	11	13	12
59	A1L3C2;P52432;D3Z7Q8;D3Z3D6;G3UXX5;G3UX92	A1L3C2;P52432;D3Z7Q8;D3Z3D6;G3UXX5	DNA-directed RNA polymerases I and III subunit RPAC1	Polr1c	tr|A1L3C2|A1L3C2_MOUSE Polr1c protein OS=Mus musculus GN=Polr1c PE=2 SV=1;sp|P52432|RPAC1_MOUSE DNA-directed RNA polymerases I and III subunit RPAC1 OS=Mus musculus GN=Polr1c PE=1 SV=3;tr|D3Z7Q8|D3Z7Q8_MOUSE DNA-directed RNA polymerases I and III subunit R	13436000	0	1891400	3922700	5835700	4748100	11264000	9968600	8125100	3481900	790380	0	111260	230750	343280	279300	662560	586390	477950	21138000	0	0	0	0	12344000	17284000	0	0	4	4	4	15	15	15	39.237	0.0013959	2.9454	59192000	7	2	0	1	1	1
60	Q80U52;A1L3P4;Q8BTG0;B0QZV3	Q80U52;A1L3P4;Q8BTG0;B0QZV3	Sodium/hydrogen exchanger	Slc9a6	tr|Q80U52|Q80U52_MOUSE Sodium/hydrogen exchanger (Fragment) OS=Mus musculus GN=Slc9a6 PE=2 SV=1;tr|A1L3P4|A1L3P4_MOUSE Sodium/hydrogen exchanger OS=Mus musculus GN=Slc9a6 PE=1 SV=1;tr|Q8BTG0|Q8BTG0_MOUSE Sodium/hydrogen exchanger OS=Mus musculus GN=Slc9a6	76144000	47690000	3947000	85196000	179380000	75528000	327730000	163940000	113200000	48762000	3461100	2167700	179410	3872500	8153900	3433100	14897000	7451700	5145500	173370000	102020000	88498000	121400000	138640000	103860000	230340000	155970000	172610000	6	6	4	11.6	11.6	8	77.75	0	15.15	1072800000	40	5	6	2	6	5
61	B1AVN9;Q3UQ19;A1L3S9;A3KGD2;B1AVN8;B1AVP0;Q91VK6;Q3UTF8	B1AVN9;Q3UQ19;A1L3S9;A3KGD2;B1AVN8;B1AVP0;Q91VK6;Q3UTF8	Phosphatase and actin regulator	Phactr2	tr|B1AVN9|B1AVN9_MOUSE Phosphatase and actin regulator OS=Mus musculus GN=Phactr2 PE=3 SV=1;tr|Q3UQ19|Q3UQ19_MOUSE Phosphatase and actin regulator OS=Mus musculus GN=Phactr2 PE=2 SV=1;tr|A1L3S9|A1L3S9_MOUSE Phosphatase and actin regulator OS=Mus musculus G	78115000	37556000	13592000	13285000	38493000	4770700	211160000	111760000	75084000	22454000	3004400	1444500	522790	510950	1480500	183490	8121400	4298300	2887800	88156000	106280000	90608000	15924000	33190000	0	127520000	142140000	154850000	7	7	7	17.3	17.3	17.3	61.763	0	69.122	583810000	33	5	5	2	3	5
62	E9PXY1;A2A432;A2A432-2;J3QJX0;Q3TP81;REV__Q8BIY3;REV__E9QNR7	E9PXY1;A2A432;A2A432-2;J3QJX0	Cullin-4B	Cul4b	tr|E9PXY1|E9PXY1_MOUSE Cullin-4B OS=Mus musculus GN=Cul4b PE=1 SV=2;sp|A2A432|CUL4B_MOUSE Cullin-4B OS=Mus musculus GN=Cul4b PE=1 SV=1;sp|A2A432-2|CUL4B_MOUSE Isoform 2 of Cullin-4B OS=Mus musculus GN=Cul4b;tr|J3QJX0|J3QJX0_MOUSE Cullin-4B OS=Mus musculus	408660000	286350000	89405000	286350000	403100000	146810000	352210000	300320000	131230000	39417000	6699300	4694300	1465700	4694300	6608200	2406700	5773900	4923200	2151300	648510000	639430000	753280000	398290000	490770000	367870000	397970000	448850000	415890000	34	20	20	35.6	22.9	22.9	102.41	0	68.832	2404400000	115	31	27	21	29	27
63	Q8K228;Q69ZU9;A2A464;Q8R4D1-4;Q8R4D1-2;Q8R4D1	Q8K228;Q69ZU9;A2A464;Q8R4D1-4;Q8R4D1-2;Q8R4D1	Sodium/hydrogen exchanger;Sodium/hydrogen exchanger 8	Slc9a8	tr|Q8K228|Q8K228_MOUSE Slc9a8 protein (Fragment) OS=Mus musculus GN=Slc9a8 PE=2 SV=1;tr|Q69ZU9|Q69ZU9_MOUSE Sodium/hydrogen exchanger (Fragment) OS=Mus musculus GN=Slc9a8 PE=2 SV=1;tr|A2A464|A2A464_MOUSE Sodium/hydrogen exchanger OS=Mus musculus GN=Slc9a8	0	0	0	428190	0	3681100	197040	0	394250	293790	0	0	0	26762	0	230070	12315	0	24641	0	0	0	0	0	0	0	0	760390	1	1	1	2.8	2.8	2.8	44.042	0.0017855	2.6462	4700600	1	0	0	0	1	0
64	A2A484;Q8CHB3;Q80Y82;A2A483;E9Q8D1;A2A482;A2A485;Q3UH28;Q3V1I9;Q3U1M7;A2A481;A2A480;Q6P4S7;Q80XT8;Q3V437;A2A486	A2A484;Q8CHB3;Q80Y82;A2A483;E9Q8D1;A2A482;A2A485;Q3UH28;Q3V1I9;Q3U1M7;A2A481;A2A480;Q6P4S7;Q80XT8		Zmynd8	tr|A2A484|A2A484_MOUSE Protein Zmynd8 OS=Mus musculus GN=Zmynd8 PE=1 SV=1;tr|Q8CHB3|Q8CHB3_MOUSE MKIAA1125 protein (Fragment) OS=Mus musculus GN=Zmynd8 PE=2 SV=4;tr|Q80Y82|Q80Y82_MOUSE Protein kinase C binding protein 1 OS=Mus musculus GN=Zmynd8 PE=2 SV=3;	128270000	50487000	28794000	308640000	321290000	172140000	28276000	18554000	15373000	14291000	1710300	673160	383920	4115200	4283900	2295100	377010	247390	204970	154410000	117700000	152510000	307630000	420230000	381610000	43204000	37665000	25303000	22	22	22	25.2	25.2	25.2	136.94	0	59.047	1071800000	53	17	16	8	18	18
65	A2A4A1;Q91ZF0;F7CGC9	A2A4A1;Q91ZF0;F7CGC9	DnaJ homolog subfamily C member 24	Dnajc24	tr|A2A4A1|A2A4A1_MOUSE DnaJ homolog subfamily C member 24 OS=Mus musculus GN=Dnajc24 PE=4 SV=1;sp|Q91ZF0|DJC24_MOUSE DnaJ homolog subfamily C member 24 OS=Mus musculus GN=Dnajc24 PE=1 SV=3;tr|F7CGC9|F7CGC9_MOUSE DnaJ homolog subfamily C member 24 (Fragment	15855000	6056800	2458900	0	9357500	8738100	14186000	13489000	4361400	7450200	1585500	605680	245890	0	935750	873810	1418600	1348900	436140	20723000	0	0	0	0	0	0	0	0	2	2	2	12.8	12.8	12.8	16.922	0.0061185	1.6989	74502000	4	2	1	1	0	1
66	A2A4A6;Q62077;Q2M4I9;Q3UZ68;G3UXP4;G3V016;Q3TUJ5;Q9Z2S5;F6SLL0	A2A4A6;Q62077;Q2M4I9;Q3UZ68	Phosphoinositide phospholipase C;1-phosphatidylinositol 4,5-bisphosphate phosphodiesterase gamma-1	Plcg1	tr|A2A4A6|A2A4A6_MOUSE Phosphoinositide phospholipase C OS=Mus musculus GN=Plcg1 PE=1 SV=1;sp|Q62077|PLCG1_MOUSE 1-phosphatidylinositol 4,5-bisphosphate phosphodiesterase gamma-1 OS=Mus musculus GN=Plcg1 PE=1 SV=2;tr|Q2M4I9|Q2M4I9_MOUSE Phosphoinositide ph	216600000	111130000	33088000	287830000	211500000	66635000	225710000	234970000	80317000	20968000	3094300	1587500	472680	4111900	3021400	951940	3224400	3356800	1147400	261000000	342170000	230470000	228890000	282420000	189070000	309090000	342970000	357490000	19	19	19	18.2	18.2	18.2	148.53	0	133.14	1467800000	80	12	12	4	15	14
67	Q3UQQ4;A2A4P0;A2A4N9;Q5DTN5;Q3TUC8;Q8R214;Q3U580	Q3UQQ4;A2A4P0;A2A4N9;Q5DTN5;Q3TUC8	ATP-dependent RNA helicase DHX8	Dhx8	tr|Q3UQQ4|Q3UQQ4_MOUSE Putative uncharacterized protein OS=Mus musculus GN=Dhx8 PE=2 SV=1;sp|A2A4P0|DHX8_MOUSE ATP-dependent RNA helicase DHX8 OS=Mus musculus GN=Dhx8 PE=2 SV=1;tr|A2A4N9|A2A4N9_MOUSE ATP-dependent RNA helicase DHX8 (Fragment) OS=Mus muscul	102070000	49678000	15806000	356970000	296800000	144430000	50234000	53584000	21125000	16040000	1501000	730560	232450	5249600	4364700	2123900	738740	788000	310660	189100000	210090000	110000000	333970000	311370000	336050000	46442000	53063000	36823000	24	23	22	26.4	25.7	25.1	142.55	0	64.23	1090700000	69	13	10	5	20	20
68	A2A4U9;Q3UUJ6;Q91Y63	A2A4U9;Q3UUJ6;Q91Y63	Solute carrier family 13 member 3	Slc13a3	tr|A2A4U9|A2A4U9_MOUSE Solute carrier family 13 member 3 OS=Mus musculus GN=Slc13a3 PE=4 SV=1;tr|Q3UUJ6|Q3UUJ6_MOUSE Solute carrier family 13 (Sodium-dependent dicarboxylate transporter), member 3, isoform CRA_b OS=Mus musculus GN=Slc13a3 PE=2 SV=1;sp|Q91Y	59698000	33077000	45787000	70718000	70733000	62788000	154770000	113760000	65789000	56426000	4974800	2756400	3815600	5893100	5894400	5232300	12898000	9479700	5482400	83093000	80949000	187780000	69159000	100100000	135130000	140190000	120210000	168970000	5	5	5	9.3	9.3	9.3	61.177	0	22.067	677120000	18	5	5	3	4	3
69	Q6DD95;A2A542;Q3U2N3;A2A545;A2A543;I2FKE4;Q8R3Z5-3;Q8R3Z5-4;Q8R3Z5;Q8R3Z5-2	Q6DD95;A2A542;Q3U2N3;A2A545;A2A543;I2FKE4;Q8R3Z5-3;Q8R3Z5-4;Q8R3Z5;Q8R3Z5-2	Voltage-dependent L-type calcium channel subunit beta-1	Cacnb1	tr|Q6DD95|Q6DD95_MOUSE Cacnb1 protein OS=Mus musculus GN=Cacnb1 PE=2 SV=1;tr|A2A542|A2A542_MOUSE Voltage-dependent L-type calcium channel subunit beta-1 OS=Mus musculus GN=Cacnb1 PE=4 SV=1;tr|Q3U2N3|Q3U2N3_MOUSE Putative uncharacterized protein OS=Mus musc	24830000	8626700	1080100	32825000	19058000	18194000	38174000	24051000	10952000	6349600	886770	308090	38575	1172300	680650	649780	1363400	858970	391130	35636000	22089000	0	25258000	29497000	31235000	27955000	33151000	27625000	11	6	6	26.8	16.8	16.8	51.987	0	5.3624	177790000	11	8	9	4	10	8
70	A2A547;Q5I0T8;P84099	A2A547;Q5I0T8;P84099	Ribosomal protein L19;60S ribosomal protein L19	Rpl19	tr|A2A547|A2A547_MOUSE Ribosomal protein L19 OS=Mus musculus GN=Rpl19 PE=3 SV=1;tr|Q5I0T8|Q5I0T8_MOUSE Ribosomal protein L19 OS=Mus musculus GN=Rpl19 PE=2 SV=1;sp|P84099|RL19_MOUSE 60S ribosomal protein L19 OS=Mus musculus GN=Rpl19 PE=1 SV=1	525090000	405140000	308950000	681920000	1309100000	619630000	692710000	261500000	120040000	547120000	58343000	45016000	34328000	75768000	145450000	68847000	76968000	29056000	13338000	680420000	881750000	922650000	1045700000	1149300000	1141500000	527780000	392920000	258640000	7	7	7	26.8	26.8	26.8	23.247	0	90.909	4924100000	96	6	6	7	7	7
71	A2A5N2;Q9CQV8;A2A5N1	A2A5N2;Q9CQV8;A2A5N1	14-3-3 protein beta/alpha;14-3-3 protein beta/alpha, N-terminally processed	Ywhab	tr|A2A5N2|A2A5N2_MOUSE Tyrosine 3-monooxygenase/tryptophan 5-monooxygenase activation protein, beta polypeptide OS=Mus musculus GN=Ywhab PE=2 SV=1;sp|Q9CQV8|1433B_MOUSE 14-3-3 protein beta/alpha OS=Mus musculus GN=Ywhab PE=1 SV=3;tr|A2A5N1|A2A5N1_MOUSE 14-	6794800000	3689400000	2999200000	5716400000	5766600000	4340600000	10978000000	8324900000	5173000000	3163700000	399690000	217020000	176430000	336260000	339210000	255330000	645780000	489700000	304300000	7530800000	8165200000	8963200000	6835900000	8628600000	7217800000	9462000000	10216000000	9997900000	18	10	1	63.4	47.2	4.1	28.086	0	323.31	53783000000	293	16	16	16	18	17
72	A2A5R2;Q3U5C3;Q3U2F2;F6YCJ0	A2A5R2;Q3U5C3	Brefeldin A-inhibited guanine nucleotide-exchange protein 2	Arfgef2	sp|A2A5R2|BIG2_MOUSE Brefeldin A-inhibited guanine nucleotide-exchange protein 2 OS=Mus musculus GN=Arfgef2 PE=1 SV=1;tr|Q3U5C3|Q3U5C3_MOUSE Putative uncharacterized protein (Fragment) OS=Mus musculus GN=Arfgef2 PE=2 SV=1	769100000	384460000	270680000	1219700000	900910000	452350000	1763500000	1177600000	647070000	69591000	7056000	3527200	2483300	11190000	8265200	4150000	16179000	10803000	5936500	1196000000	1561200000	1561600000	1171900000	1059600000	1018900000	1783900000	1579800000	1787200000	68	68	48	46.2	46.2	34.9	202.24	0	323.31	7585400000	338	49	52	40	51	50
73	A2A5R8;Q9DBE7;Q3U8D3;Q641P2;Q3TJ07;Q3UTC8;Q3TWA1;Q3U7A6;A2A5S3;Q3TWP5;Q3TU43;Q3UKX3;Q9Z108;V9GX87;Q6TNG5	A2A5R8;Q9DBE7;Q3U8D3;Q641P2;Q3TJ07;Q3UTC8;Q3TWA1;Q3U7A6;A2A5S3;Q3TWP5;Q3TU43;Q3UKX3;Q9Z108;V9GX87;Q6TNG5	Double-stranded RNA-binding protein Staufen homolog 1	Stau1	tr|A2A5R8|A2A5R8_MOUSE Double-stranded RNA-binding protein Staufen homolog 1 OS=Mus musculus GN=Stau1 PE=4 SV=1;tr|Q9DBE7|Q9DBE7_MOUSE Double-stranded RNA-binding protein Staufen homolog 1 OS=Mus musculus GN=Stau1 PE=2 SV=1;tr|Q3U8D3|Q3U8D3_MOUSE Putative	108690000	38429000	29190000	135130000	73463000	40076000	77104000	44905000	20200000	17187000	3293500	1164500	884540	4094700	2226100	1214400	2336500	1360800	612120	168610000	129820000	157280000	135960000	99673000	139500000	102850000	113790000	117380000	12	12	12	28	28	28	53.746	0	16.896	567180000	46	9	8	6	12	10
74	A2A5V3;A2A5V2;S4R2D3;A2A5V4;P55194;A2A5V1;S4R2T6	A2A5V3;A2A5V2;S4R2D3;A2A5V4;P55194	SH3 domain-binding protein 1	Sh3bp1	tr|A2A5V3|A2A5V3_MOUSE SH3 domain-binding protein 1 OS=Mus musculus GN=Sh3bp1 PE=4 SV=1;tr|A2A5V2|A2A5V2_MOUSE SH3 domain-binding protein 1 OS=Mus musculus GN=Sh3bp1 PE=4 SV=1;tr|S4R2D3|S4R2D3_MOUSE SH3 domain-binding protein 1 OS=Mus musculus GN=Sh3bp1 PE	9760000	2977300	0	31645000	21129000	10404000	23884000	8118800	11397000	3728600	305000	93040	0	988900	660270	325120	746380	253710	356150	21218000	24590000	0	19092000	32877000	27075000	26023000	26541000	37488000	4	4	4	9.6	9.6	9.6	64.462	0	11.216	119310000	9	3	2	0	3	3
75	Q3UQ95;A2A5W4;Q6P0X6;Q923X4-2;Q923X4;B7ZC40	Q3UQ95;A2A5W4;Q6P0X6;Q923X4-2;Q923X4;B7ZC40	Glutaredoxin-2, mitochondrial	Glrx2	tr|Q3UQ95|Q3UQ95_MOUSE Putative uncharacterized protein OS=Mus musculus GN=Glrx2 PE=2 SV=1;tr|A2A5W4|A2A5W4_MOUSE Glutaredoxin 2 (Thioltransferase) OS=Mus musculus GN=Glrx2 PE=2 SV=1;tr|Q6P0X6|Q6P0X6_MOUSE Glrx2 protein (Fragment) OS=Mus musculus GN=Glrx2	15928000	7789000	7916200	26842000	24381000	18336000	17776000	17098000	26687000	20344000	1991000	973630	989520	3355200	3047700	2292000	2222000	2137200	3335800	0	0	0	27441000	27198000	0	0	21790000	0	3	3	3	42.3	42.3	42.3	14.042	0	5.3793	162750000	9	1	1	1	2	2
76	A2A5Y6;P10637-6;Q8C5K4;Q76M61;B1AQW6;B1AQW5	A2A5Y6;P10637-6	Microtubule-associated protein;Microtubule-associated protein tau	Mapt	tr|A2A5Y6|A2A5Y6_MOUSE Microtubule-associated protein OS=Mus musculus GN=Mapt PE=1 SV=1;sp|P10637-6|TAU_MOUSE Isoform Tau-E of Microtubule-associated protein tau OS=Mus musculus GN=Mapt	8276500000	3466100000	2494500000	6955900000	6522400000	3117100000	11715000000	8769000000	3945100000	1381500000	206910000	86652000	62361000	173900000	163060000	77927000	292870000	219230000	98626000	10345000000	9333300000	10420000000	8382100000	9952200000	9638300000	14507000000	12745000000	12710000000	32	32	1	54.5	54.5	1.9	78.085	0	323.31	55261000000	689	29	29	26	28	29
77	A2A5Z6-2;A2A5Z6;Q6P066;Q9CSE3;Q80WX3	A2A5Z6-2;A2A5Z6;Q6P066;Q9CSE3	E3 ubiquitin-protein ligase SMURF2	Smurf2	sp|A2A5Z6-2|SMUF2_MOUSE Isoform 2 of E3 ubiquitin-protein ligase SMURF2 OS=Mus musculus GN=Smurf2;sp|A2A5Z6|SMUF2_MOUSE E3 ubiquitin-protein ligase SMURF2 OS=Mus musculus GN=Smurf2 PE=1 SV=1;tr|Q6P066|Q6P066_MOUSE Smurf2 protein (Fragment) OS=Mus musculus	53865000	2785600	0	19313000	35994000	0	92440000	65238000	4847000	5967000	1171000	60558	0	419840	782470	0	2009600	1418200	105370	0	0	0	23690000	0	0	76011000	0	0	5	5	3	6.4	6.4	3.8	84.568	0.00086195	3.4657	274480000	4	2	2	0	3	2
78	E9Q6A7;A2A655;A2A654;E5D6T0;Q8K092;Q3UPA6;Q6P9L3;Q8CFX5;Q8C473;Q8VDN7;Q3TMJ3;A2A653	E9Q6A7;A2A655;A2A654;E5D6T0		Bptf	tr|E9Q6A7|E9Q6A7_MOUSE Protein Bptf OS=Mus musculus GN=Bptf PE=4 SV=1;tr|A2A655|A2A655_MOUSE Protein Bptf OS=Mus musculus GN=Bptf PE=4 SV=1;tr|A2A654|A2A654_MOUSE Protein Bptf OS=Mus musculus GN=Bptf PE=4 SV=1;tr|E5D6T0|E5D6T0_MOUSE Bromodomain PHD finger	65464000	31595000	6602600	158330000	166150000	64474000	34882000	48867000	11989000	3771500	419640	202530	42324	1014900	1065100	413300	223600	313250	76854	96367000	110500000	50426000	204560000	229950000	140300000	49049000	48374000	39470000	20	20	20	9.3	9.3	9.3	321.59	0	33.058	588350000	38	10	10	3	17	14
79	A2A690;A2A690-2;F6VCI2;F6VP19;Q3UF55	A2A690;A2A690-2	Protein TANC2	Tanc2	sp|A2A690|TANC2_MOUSE Protein TANC2 OS=Mus musculus GN=Tanc2 PE=1 SV=1;sp|A2A690-2|TANC2_MOUSE Isoform 2 of Protein TANC2 OS=Mus musculus GN=Tanc2	449600000	78126000	46332000	56509000	283510000	47070000	123130000	79787000	57433000	10906000	4014300	697550	413680	504540	2531300	420270	1099400	712380	512800	279710000	158230000	147500000	132360000	197720000	133800000	269460000	162830000	138460000	15	14	14	8.7	8.4	8.4	220.26	0	23.869	1221500000	27	8	6	4	9	10
80	A2A699;A2A699-2	A2A699;A2A699-2	Protein FAM171A2	Fam171a2	sp|A2A699|F1712_MOUSE Protein FAM171A2 OS=Mus musculus GN=Fam171a2 PE=1 SV=1;sp|A2A699-2|F1712_MOUSE Isoform 2 of Protein FAM171A2 OS=Mus musculus GN=Fam171a2	145930000	56982000	51447000	173930000	104990000	85974000	347230000	230610000	93558000	32266000	3648300	1424500	1286200	4348300	2624800	2149300	8680600	5765200	2338900	198970000	167740000	347410000	143070000	144950000	217400000	284470000	308930000	340500000	14	14	13	23.7	23.7	22.6	87.486	0	64.947	1290700000	72	10	9	6	8	7
81	A2A6A1;A0PJ58	A2A6A1;A0PJ58	G patch domain-containing protein 8	Gpatch8	sp|A2A6A1|GPTC8_MOUSE G patch domain-containing protein 8 OS=Mus musculus GN=Gpatch8 PE=1 SV=1;tr|A0PJ58|A0PJ58_MOUSE Gpatch8 protein (Fragment) OS=Mus musculus GN=Gpatch8 PE=2 SV=1	20133000	8661600	6812500	55321000	81210000	25858000	6644200	7183200	7751500	3049600	279620	120300	94619	768350	1127900	359130	92281	99766	107660	28811000	28515000	48915000	54114000	75046000	47717000	13035000	17074000	0	5	5	5	5	5	5	164.99	0	5.9671	219570000	11	3	3	2	5	5
82	A2A6M1;Q9CZ28	A2A6M1;Q9CZ28	Vacuolar-sorting protein SNF8	Snf8	tr|A2A6M1|A2A6M1_MOUSE Vacuolar-sorting protein SNF8 OS=Mus musculus GN=Snf8 PE=4 SV=1;sp|Q9CZ28|SNF8_MOUSE Vacuolar-sorting protein SNF8 OS=Mus musculus GN=Snf8 PE=2 SV=1	33159000	27248000	25151000	49119000	37831000	53778000	46057000	35850000	29032000	42153000	4144900	3406000	3143800	6139900	4728900	6722200	5757100	4481200	3629100	29777000	54701000	63526000	75344000	50167000	59489000	72431000	42578000	37092000	5	5	5	30	30	30	25.968	0	45.324	337220000	14	3	4	3	3	3
83	A2A6P4	A2A6P4		Fam104a	tr|A2A6P4|A2A6P4_MOUSE Protein Fam104a OS=Mus musculus GN=Fam104a PE=4 SV=1	0	0	0	0	0	0	0	0	0	0	0	0	0	0	0	0	0	0	0	0	0	0	0	0	0	0	0	0	1	1	1	13	13	13	19.618	0.0057582	1.7319	0	1	0	0	0	0	0
84	A2A6Q5;A2A6Q5-3;A2A6Q5-2;Q3TTW1;Q3UYS3;Q8BYJ1;Q8R568	A2A6Q5;A2A6Q5-3;A2A6Q5-2	Cell division cycle protein 27 homolog	Cdc27	sp|A2A6Q5|CDC27_MOUSE Cell division cycle protein 27 homolog OS=Mus musculus GN=Cdc27 PE=1 SV=1;sp|A2A6Q5-3|CDC27_MOUSE Isoform 3 of Cell division cycle protein 27 homolog OS=Mus musculus GN=Cdc27;sp|A2A6Q5-2|CDC27_MOUSE Isoform 2 of Cell division cycle pr	4498600	1584000	1826600	10343000	7516200	5347800	5573800	1967600	2324300	999550	109720	38634	44552	252260	183320	130430	135950	47991	56691	0	0	0	0	0	0	9522700	0	7290900	3	3	3	3.6	3.6	3.6	91.841	0.0031788	2.1558	40982000	4	2	1	2	2	2
85	A2A6S2;Q01098;Q61984	A2A6S2;Q01098;Q61984	Glutamate receptor ionotropic, NMDA 2C	Grin2c;NMDA2C	tr|A2A6S2|A2A6S2_MOUSE Glutamate receptor, ionotropic, NMDA2C (Epsilon 3) OS=Mus musculus GN=Grin2c PE=2 SV=1;sp|Q01098|NMDE3_MOUSE Glutamate receptor ionotropic, NMDA 2C OS=Mus musculus GN=Grin2c PE=2 SV=2;tr|Q61984|Q61984_MOUSE N-methyl-D-aspartate recep	462030000	248440000	128670000	1372600000	1588600000	899910000	85723000	90350000	33832000	81836000	7700600	4140700	2144400	22877000	26476000	14999000	1428700	1505800	563870	764570000	854770000	755970000	1522500000	1923100000	1823200000	208480000	191980000	114230000	44	44	40	43	43	41.6	135.42	0	323.31	4910200000	216	32	32	20	41	38
86	B2RWR4;B7ZMV4;A2A6T1	B2RWR4;B7ZMV4;A2A6T1	Cerebellar degeneration-related protein 2-like	Cdr2l	tr|B2RWR4|B2RWR4_MOUSE Cerebellar degeneration-related protein 2-like OS=Mus musculus GN=Cdr2l PE=2 SV=1;tr|B7ZMV4|B7ZMV4_MOUSE Cdr2l protein OS=Mus musculus GN=Cdr2l PE=2 SV=1;sp|A2A6T1|CDR2L_MOUSE Cerebellar degeneration-related protein 2-like OS=Mus mus	189750000	32923000	9044400	396140000	100480000	16929000	202230000	65992000	21927000	33401000	6121100	1062000	291750	12779000	3241400	546100	6523600	2128800	707310	105800000	131490000	138600000	132340000	167950000	137990000	186170000	110370000	140840000	7	7	7	17.8	17.8	17.8	53.238	0	9.7668	1035400000	28	3	5	3	7	6
87	A2A6U3;Q80UG5-3;Q80UG5;Q3TDR9;Q80UG5-2;A2A6U5;A8Y5D3	A2A6U3;Q80UG5-3;Q80UG5;Q3TDR9;Q80UG5-2;A2A6U5	Septin-9	2009-09-01	tr|A2A6U3|A2A6U3_MOUSE Septin-9 OS=Mus musculus GN=Sept9 PE=1 SV=1;sp|Q80UG5-3|SEPT9_MOUSE Isoform 3 of Septin-9 OS=Mus musculus GN=Sept9;sp|Q80UG5|SEPT9_MOUSE Septin-9 OS=Mus musculus GN=Sept9 PE=1 SV=1;tr|Q3TDR9|Q3TDR9_MOUSE Putative uncharacterized prot	132680000	85884000	38898000	297170000	184640000	108900000	180770000	156220000	70723000	30631000	3236000	2094700	948720	7247900	4503500	2656100	4408900	3810200	1725000	186150000	192970000	162220000	351650000	313780000	212800000	135940000	152200000	105030000	12	12	12	24.1	24.1	24.1	63.772	0	25.094	1255900000	39	8	11	9	10	9
88	F8VQM4;A2A716;Q3TAX1;Q5U471	F8VQM4;A2A716;Q3TAX1	Oxysterol-binding protein	Osbpl7	tr|F8VQM4|F8VQM4_MOUSE Oxysterol-binding protein OS=Mus musculus GN=Osbpl7 PE=3 SV=1;tr|A2A716|A2A716_MOUSE Oxysterol-binding protein OS=Mus musculus GN=Osbpl7 PE=3 SV=1;tr|Q3TAX1|Q3TAX1_MOUSE Oxysterol-binding protein (Fragment) OS=Mus musculus GN=Osbpl7	35203000	11549000	3123100	60750000	61405000	18873000	41612000	20283000	20427000	5464500	704060	230980	62463	1215000	1228100	377470	832250	405650	408530	73865000	51922000	0	102440000	102570000	85359000	58319000	62461000	70438000	9	9	8	17.6	17.6	15.9	89.916	0	9.514	273230000	17	5	5	1	7	7
89	A2A791;F6VYE2;A2A791-2	A2A791;F6VYE2;A2A791-2	Zinc finger MYM-type protein 4	Zmym4	sp|A2A791|ZMYM4_MOUSE Zinc finger MYM-type protein 4 OS=Mus musculus GN=Zmym4 PE=2 SV=1;tr|F6VYE2|F6VYE2_MOUSE Zinc finger MYM-type protein 4 (Fragment) OS=Mus musculus GN=Zmym4 PE=4 SV=1;sp|A2A791-2|ZMYM4_MOUSE Isoform 2 of Zinc finger MYM-type protein 4	31352000	19704000	5508300	64712000	43547000	22722000	6561100	5799400	1596600	2427700	377730	237400	66365	779670	524670	273760	79050	69873	19236	53415000	40090000	36930000	44185000	43091000	62854000	0	13321000	0	12	12	12	10.6	10.6	10.6	172.44	0	9.8576	201500000	17	8	7	4	9	7
90	A2A7A7;Q8CFX1;Q8QZU3;Q3TFM8;Q8BMC8;A2A7A8	A2A7A7;Q8CFX1;Q8QZU3	GDH/6PGL endoplasmic bifunctional protein;Glucose 1-dehydrogenase;6-phosphogluconolactonase	H6pd	tr|A2A7A7|A2A7A7_MOUSE GDH/6PGL endoplasmic bifunctional protein OS=Mus musculus GN=H6pd PE=1 SV=1;sp|Q8CFX1|G6PE_MOUSE GDH/6PGL endoplasmic bifunctional protein OS=Mus musculus GN=H6pd PE=1 SV=2;tr|Q8QZU3|Q8QZU3_MOUSE H6pd protein (Fragment) OS=Mus muscul	20312000	5926400	7338900	20694000	15752000	10546000	28069000	16980000	9915500	3227000	483620	141100	174740	492700	375040	251090	668320	404280	236080	39813000	0	42387000	20665000	14329000	23068000	36236000	23091000	30883000	6	6	6	10.5	10.5	10.5	89.909	0	21.323	135530000	13	4	3	2	4	4
91	A2A7B5;B9EKQ3;Q80VF3	A2A7B5;B9EKQ3;Q80VF3		Prdm2	tr|A2A7B5|A2A7B5_MOUSE Protein Prdm2 OS=Mus musculus GN=Prdm2 PE=1 SV=1;tr|B9EKQ3|B9EKQ3_MOUSE Prdm2 protein OS=Mus musculus GN=Prdm2 PE=2 SV=1;tr|Q80VF3|Q80VF3_MOUSE Prdm2 protein (Fragment) OS=Mus musculus GN=Prdm2 PE=2 SV=1	61366000	16842000	10590000	42820000	77469000	18814000	10343000	9142300	7143300	2828100	681840	187130	117660	475780	860760	209040	114920	101580	79370	31796000	40092000	33965000	44077000	93079000	101050000	22791000	22419000	0	7	7	7	5.1	5.1	5.1	187.2	0	13.265	254530000	17	4	3	3	6	5
92	A2A7H4;A2A7H5;E9PUJ0;G3UZT3;G3UYF5;Q8BK26-2;Q8BK26;D6RHP0;G3UY69;F6UI76;A2A7H6	A2A7H4;A2A7H5;E9PUJ0;G3UZT3;G3UYF5;Q8BK26-2;Q8BK26	F-box only protein 44	Fbxo44	tr|A2A7H4|A2A7H4_MOUSE F-box only protein 44 (Fragment) OS=Mus musculus GN=Fbxo44 PE=4 SV=1;tr|A2A7H5|A2A7H5_MOUSE F-box only protein 44 OS=Mus musculus GN=Fbxo44 PE=4 SV=1;tr|E9PUJ0|E9PUJ0_MOUSE F-box only protein 44 OS=Mus musculus GN=Fbxo44 PE=4 SV=1;tr	14940000	7152300	3919700	7325200	19637000	2976100	27731000	26089000	12398000	7186400	878840	420730	230570	430890	1155100	175070	1631200	1534600	729310	37635000	0	0	0	46134000	0	31745000	36237000	33508000	3	3	3	15.1	15.1	15.1	27.24	0.00015408	5.0169	122170000	16	2	1	1	1	2
93	Q8C5M8;A2A7K5;Q9EQS3;Q3V1X1	Q8C5M8;A2A7K5;Q9EQS3;Q3V1X1	C-Myc-binding protein	Mycbp	tr|Q8C5M8|Q8C5M8_MOUSE Putative uncharacterized protein OS=Mus musculus GN=Mycbp PE=2 SV=1;tr|A2A7K5|A2A7K5_MOUSE C-Myc-binding protein OS=Mus musculus GN=Mycbp PE=4 SV=1;sp|Q9EQS3|MYCBP_MOUSE C-Myc-binding protein OS=Mus musculus GN=Mycbp PE=2 SV=5;tr|Q3V	43992000	14592000	22565000	158930000	153150000	45032000	42877000	33892000	27080000	77445000	6284500	2084500	3223600	22704000	21879000	6433200	6125200	4841700	3868500	59737000	64340000	99092000	178570000	124810000	98911000	70038000	67633000	80376000	3	3	3	44.7	44.7	44.7	11.998	0	7.1405	542110000	13	3	1	2	3	3
94	A2A7S7;Q91WQ3;F6VXZ2	A2A7S7;Q91WQ3	Tyrosine--tRNA ligase;Tyrosine--tRNA ligase, cytoplasmic;Tyrosine--tRNA ligase, cytoplasmic, N-terminally processed	Yars	tr|A2A7S7|A2A7S7_MOUSE Tyrosine--tRNA ligase, cytoplasmic OS=Mus musculus GN=Yars PE=4 SV=1;sp|Q91WQ3|SYYC_MOUSE Tyrosine--tRNA ligase, cytoplasmic OS=Mus musculus GN=Yars PE=2 SV=3	1309700000	497690000	180030000	1018100000	1382600000	670430000	1567200000	960620000	402590000	169980000	27865000	10589000	3830400	21661000	29417000	14264000	33345000	20439000	8565800	1592000000	1395600000	1099200000	1097200000	1235300000	1135100000	1349700000	1222600000	1118400000	49	49	49	79.6	79.6	79.6	63.001	0	202.86	7988900000	287	38	38	25	43	41
95	A2A7Z4;Q78IG7;Q9CQH7	A2A7Z4;Q78IG7;Q9CQH7	Transcription factor BTF3;Transcription factor BTF3 homolog 4	Btf3l4	tr|A2A7Z4|A2A7Z4_MOUSE Basic transcription factor 3-like 4 OS=Mus musculus GN=Btf3l4 PE=2 SV=1;tr|Q78IG7|Q78IG7_MOUSE Btf3l4 protein (Fragment) OS=Mus musculus GN=Btf3l4 PE=2 SV=1;sp|Q9CQH7|BT3L4_MOUSE Transcription factor BTF3 homolog 4 OS=Mus musculus GN	253630000	75307000	42497000	350810000	308240000	152070000	145980000	118360000	53040000	149990000	25363000	7530700	4249700	35081000	30824000	15207000	14598000	11836000	5304000	331570000	257560000	186750000	253980000	370290000	322490000	170710000	176860000	147920000	6	6	6	49.4	49.4	49.4	17.27	0	60.018	1499900000	51	5	5	5	6	5
96	A2A841;P48193;P48193-2;A2A839;A2A838;A2AD32;A0A068WAZ7;A2A842;A0A068WAQ5;B6ZHC8;F7BUB8;F6S4K9;Q3V048;B6ZHC2;Q3U0G7;F7CR30	A2A841;P48193;P48193-2;A2A839;A2A838;A2AD32;A0A068WAZ7;A2A842;A0A068WAQ5;B6ZHC8	Protein 4.1	Epb4.1;Epb41	tr|A2A841|A2A841_MOUSE Protein 4.1 OS=Mus musculus GN=Epb4.1 PE=1 SV=1;sp|P48193|41_MOUSE Protein 4.1 OS=Mus musculus GN=Epb41 PE=1 SV=2;sp|P48193-2|41_MOUSE Isoform 2 of Protein 4.1 OS=Mus musculus GN=Epb41;tr|A2A839|A2A839_MOUSE Protein 4.1 OS=Mus muscul	2089300000	553700000	495450000	3039500000	2732500000	1253400000	1317900000	831050000	651470000	235720000	37987000	10067000	9008200	55264000	49682000	22789000	23962000	15110000	11845000	2255800000	2005900000	2360200000	2553700000	3262300000	3000800000	1503600000	1399100000	1796300000	42	37	15	50.7	45.8	21.5	97.239	0	323.31	12964000000	284	35	30	24	38	33
97	A2A858;Q80UG7;B2RUP2-2;B2RUP2	A2A858;Q80UG7;B2RUP2-2;B2RUP2	Protein unc-13 homolog D	Unc13d	tr|A2A858|A2A858_MOUSE Protein unc-13 homolog D (Fragment) OS=Mus musculus GN=Unc13d PE=4 SV=1;tr|Q80UG7|Q80UG7_MOUSE Unc13d protein OS=Mus musculus GN=Unc13d PE=2 SV=1;sp|B2RUP2-2|UN13D_MOUSE Isoform 2 of Protein unc-13 homolog D OS=Mus musculus GN=Unc13d	568760	173060	361340	567620	390060	0	6031300	4162600	2847800	3775600	142190	43266	90336	141910	97515	0	1507800	1040700	711960	0	0	2214300	0	0	0	6691800	5386200	6172700	1	1	1	11.8	11.8	11.8	9.0752	0.0030488	2.1682	15103000	5	1	1	1	1	1
98	A2A880;Q9CUA3;Q91WL6	A2A880;Q9CUA3;Q91WL6	Sorting nexin-11	Snx11	tr|A2A880|A2A880_MOUSE Sorting nexin-11 (Fragment) OS=Mus musculus GN=Snx11 PE=4 SV=1;tr|Q9CUA3|Q9CUA3_MOUSE Putative uncharacterized protein (Fragment) OS=Mus musculus GN=Snx11 PE=2 SV=1;sp|Q91WL6|SNX11_MOUSE Sorting nexin-11 OS=Mus musculus GN=Snx11 PE=1	10240000	3956700	5047600	6444200	6285600	2860500	13029000	11266000	6259800	5449100	853320	329730	420640	537020	523800	238370	1085700	938870	521650	17890000	0	0	0	0	0	0	0	0	1	1	1	6.6	6.6	6.6	22.392	0.0077997	1.5569	65390000	7	1	1	1	1	1
99	A2A891;A2A891-2;A2A891-5;Z4YMK8;Q8CCN7	A2A891;A2A891-2;A2A891-5	Calmodulin-binding transcription activator 1	Camta1	sp|A2A891|CMTA1_MOUSE Calmodulin-binding transcription activator 1 OS=Mus musculus GN=Camta1 PE=2 SV=1;sp|A2A891-2|CMTA1_MOUSE Isoform 2 of Calmodulin-binding transcription activator 1 OS=Mus musculus GN=Camta1;sp|A2A891-5|CMTA1_MOUSE Isoform 5 of Calmodul	26014000	19997000	10167000	86037000	183170000	47717000	3204300	1447400	0	5555200	382560	294080	149520	1265200	2693700	701730	47122	21285	0	36980000	31501000	44716000	88598000	188630000	104700000	6778500	10357000	0	14	14	2	10.3	10.3	1.3	184.32	0	24.864	377750000	25	4	7	3	9	12
100	A2A8E2;Q8BHG2;Q8BHG2-3;B7ZC72;B7ZC71;Q8BHG2-2;A2A8E4;D6REH4	A2A8E2;Q8BHG2;Q8BHG2-3;B7ZC72;B7ZC71;Q8BHG2-2	UPF0587 protein C1orf123 homolog	0610037L13Rik	tr|A2A8E2|A2A8E2_MOUSE Protein 0610037L13Rik OS=Mus musculus GN=0610037L13Rik PE=4 SV=1;sp|Q8BHG2|CA123_MOUSE UPF0587 protein C1orf123 homolog OS=Mus musculus PE=2 SV=1;sp|Q8BHG2-3|CA123_MOUSE Isoform 3 of UPF0587 protein C1orf123 homolog OS=Mus musculus;t	122550000	90163000	71563000	132140000	130580000	72502000	431070000	208550000	114420000	124870000	11141000	8196600	6505700	12013000	11871000	6591100	39188000	18959000	10402000	195610000	176410000	305610000	250400000	153110000	210990000	275820000	284240000	361250000	6	6	6	52.2	52.2	52.2	15.783	0	16.493	1373500000	27	4	6	3	3	5
101	A2A8F6;Q9D6I9	A2A8F6;Q9D6I9	Leucine rich adaptor protein 1	Lurap1	tr|A2A8F6|A2A8F6_MOUSE MCG19659, isoform CRA_b OS=Mus musculus GN=Lurap1 PE=2 SV=1;sp|Q9D6I9|LURA1_MOUSE Leucine rich adaptor protein 1 OS=Mus musculus GN=Lurap1 PE=2 SV=1	33700000	11049000	4998800	77001000	37123000	29536000	39759000	17920000	16341000	20571000	2592300	849930	384520	5923100	2855600	2272000	3058400	1378400	1257000	42588000	53974000	50095000	102760000	81831000	84574000	77659000	71475000	64092000	5	5	5	37.2	37.2	37.2	25.83	0	24.438	267430000	21	3	2	1	3	3
102	A2A8L1;E9PYU4;E9PYL1;Q4QQN1;Q8BL30;Q9CUI4;Q8BR71	A2A8L1;E9PYU4;E9PYL1	Chromodomain-helicase-DNA-binding protein 5	Chd5	sp|A2A8L1|CHD5_MOUSE Chromodomain-helicase-DNA-binding protein 5 OS=Mus musculus GN=Chd5 PE=1 SV=1;tr|E9PYU4|E9PYU4_MOUSE Chromodomain-helicase-DNA-binding protein 5 OS=Mus musculus GN=Chd5 PE=4 SV=1;tr|E9PYL1|E9PYL1_MOUSE Chromodomain-helicase-DNA-binding	9451600	0	0	2475400	0	0	0	0	0	107450	85149	0	0	22301	0	0	0	0	0	18432000	0	0	0	0	0	0	0	0	18	3	1	10.1	1.8	0.7	222.51	0.0035326	2.0123	11927000	3	17	13	12	16	13
103	A2A8L5;Q4U1Z0;Q3V0J9;Q3TT24	A2A8L5;Q4U1Z0	Receptor-type tyrosine-protein phosphatase F	Ptprf	sp|A2A8L5|PTPRF_MOUSE Receptor-type tyrosine-protein phosphatase F OS=Mus musculus GN=Ptprf PE=1 SV=1;tr|Q4U1Z0|Q4U1Z0_MOUSE Protein tyrosine phosphatase (Fragment) OS=Mus musculus GN=Ptprf PE=2 SV=1	32100000	13036000	7148200	54250000	44288000	11561000	24917000	44373000	32315000	2378300	289190	117450	64398	488740	398990	104150	224480	399760	291130	65522000	39881000	0	59455000	60200000	67690000	66907000	88281000	84538000	25	14	1	17.3	10.3	1.4	211.49	0	15.797	263990000	16	17	15	8	20	18
104	A8Y5G5;A2A8R0;A0S860;Q80XL0	A8Y5G5;A2A8R0;A0S860		Zfyve9	tr|A8Y5G5|A8Y5G5_MOUSE Protein Zfyve9 OS=Mus musculus GN=Zfyve9 PE=4 SV=1;tr|A2A8R0|A2A8R0_MOUSE MCG17975 OS=Mus musculus GN=Zfyve9 PE=4 SV=1;tr|A0S860|A0S860_MOUSE Protein Zfyve9 OS=Mus musculus GN=Zfyve9 PE=2 SV=1	40283000	26352000	7549300	68787000	58128000	12373000	51831000	28725000	14120000	4891200	639410	418280	119830	1091900	922670	196390	822720	455950	224130	73283000	63633000	111880000	72396000	69351000	66419000	79384000	48838000	52610000	7	7	7	8.5	8.5	8.5	146.33	0	14.429	308150000	18	5	6	2	5	5
105	A2A8R7;B2RX14;Q8BIZ5	A2A8R7;B2RX14;Q8BIZ5	Terminal uridylyltransferase 4	Zcchc11	tr|A2A8R7|A2A8R7_MOUSE Terminal uridylyltransferase 4 OS=Mus musculus GN=Zcchc11 PE=1 SV=1;sp|B2RX14|TUT4_MOUSE Terminal uridylyltransferase 4 OS=Mus musculus GN=Zcchc11 PE=1 SV=2;tr|Q8BIZ5|Q8BIZ5_MOUSE Putative uncharacterized protein OS=Mus musculus GN=Z	2224300	1647100	0	10736000	7383300	1783200	6236000	4134200	4064100	370950	21595	15992	0	104230	71683	17313	60544	40138	39458	0	0	0	7745300	6238800	0	5717500	5881300	7212100	3	2	2	2.1	1.5	1.5	185.12	0.0070743	1.6054	38208000	5	2	2	0	3	3
106	Q9QYM6;A2A977;A2A8T1;O88833	Q9QYM6;A2A977;A2A8T1;O88833	Cytochrome P450 4A10	Cyp4a10;Cyp4a32	tr|Q9QYM6|Q9QYM6_MOUSE PBS4A5 OS=Mus musculus GN=Cyp4a10 PE=2 SV=1;tr|A2A977|A2A977_MOUSE Cytochrome P450 4A10 OS=Mus musculus GN=Cyp4a10 PE=3 SV=1;tr|A2A8T1|A2A8T1_MOUSE MCG141487 OS=Mus musculus GN=Cyp4a32 PE=3 SV=1;sp|O88833|CP4AA_MOUSE Cytochrome P450	630060000	347780000	6818200	5315900000	1512300000	870080000	87753000	927060000	16307000	422350000	27394000	15121000	296440	231130000	65752000	37830000	3815300	40307000	709000	625280000	706360000	0	1504400000	3051500000	2118200000	0	1003600000	206870000	2	2	2	6.4	6.4	6.4	44.835	0.0086618	1.5382	9714000000	10	2	2	1	2	2
107	A2A8U2-2;A2A8U2-3;A2A8U2;Q3TXY3;Q8C397;Q8C9U2	A2A8U2-2;A2A8U2-3;A2A8U2;Q3TXY3;Q8C397;Q8C9U2	Transmembrane protein 201	Tmem201	sp|A2A8U2-2|TM201_MOUSE Isoform Samp1 of Transmembrane protein 201 OS=Mus musculus GN=Tmem201;sp|A2A8U2-3|TM201_MOUSE Isoform 3 of Transmembrane protein 201 OS=Mus musculus GN=Tmem201;sp|A2A8U2|TM201_MOUSE Transmembrane protein 201 OS=Mus musculus GN=Tmem2	757990000	309040000	260070000	1538400000	1361000000	782940000	227610000	138080000	88283000	420260000	58307000	23773000	20006000	118340000	104690000	60226000	17508000	10622000	6791000	968250000	1240100000	1225100000	2024600000	2231400000	2720200000	472340000	454610000	407010000	11	11	11	34.9	34.9	34.9	43.548	0	98.534	5463400000	124	10	9	8	11	10
108	E9QKA4;A2A8V9;E9PUK6;Q52KI8-2;Q52KI8;A2A8V8;A2A983;F7BWM1;F6T4M4;F6UK16	E9QKA4;A2A8V9;E9PUK6;Q52KI8-2;Q52KI8;A2A8V8	Serine/arginine repetitive matrix protein 1	Srrm1	tr|E9QKA4|E9QKA4_MOUSE Serine/arginine repetitive matrix protein 1 OS=Mus musculus GN=Srrm1 PE=1 SV=1;tr|A2A8V9|A2A8V9_MOUSE Serine/arginine repetitive matrix protein 1 OS=Mus musculus GN=Srrm1 PE=1 SV=1;tr|E9PUK6|E9PUK6_MOUSE Serine/arginine repetitive ma	251940000	71992000	42571000	767370000	532540000	330390000	51196000	52684000	21525000	41612000	4939900	1411600	834720	15046000	10442000	6478300	1003800	1033000	422050	225780000	289280000	224170000	540210000	416840000	572600000	62093000	65447000	67809000	10	10	10	12.9	12.9	12.9	101.16	0	31.078	2122200000	55	8	8	5	9	9
109	F6UHR6;E9PXZ2;A2A8Z1;E9Q6C1;Q5FWX7;Z4YJX3;A2A8Z1-2;Q8VDM5;Q8R0G3;Q99LZ2;F8VQE8	F6UHR6;E9PXZ2;A2A8Z1;E9Q6C1;Q5FWX7;Z4YJX3;A2A8Z1-2;Q8VDM5;Q8R0G3	Oxysterol-binding protein;Oxysterol-binding protein-related protein 9	Osbpl9	tr|F6UHR6|F6UHR6_MOUSE Oxysterol-binding protein OS=Mus musculus GN=Osbpl9 PE=1 SV=2;tr|E9PXZ2|E9PXZ2_MOUSE Oxysterol-binding protein OS=Mus musculus GN=Osbpl9 PE=1 SV=2;sp|A2A8Z1|OSBL9_MOUSE Oxysterol-binding protein-related protein 9 OS=Mus musculus GN=O	120780000	51197000	36032000	105260000	69311000	83321000	200770000	122960000	74482000	28804000	4026100	1706600	1201100	3508500	2310400	2777400	6692300	4098600	2482700	129290000	136730000	160680000	97705000	105770000	146890000	188660000	182360000	193710000	14	14	14	27.5	27.5	27.5	81.09	0	20.473	864110000	42	8	6	5	9	7
110	A8Y5H7;Q99J07;Q9DBQ0;A2A9B9;Q6A071;Q8BXE6	A8Y5H7;Q99J07;Q9DBQ0;A2A9B9;Q6A071		Sec14l1	tr|A8Y5H7|A8Y5H7_MOUSE Protein Sec14l1 OS=Mus musculus GN=Sec14l1 PE=4 SV=1;tr|Q99J07|Q99J07_MOUSE Protein Sec14l1 OS=Mus musculus GN=Sec14l1 PE=2 SV=1;tr|Q9DBQ0|Q9DBQ0_MOUSE Putative uncharacterized protein OS=Mus musculus GN=Sec14l1 PE=2 SV=1;tr|A2A9B9|A	76657000	17261000	6345400	35863000	15906000	5476900	128100000	105600000	41678000	9838400	1742200	392300	144210	815060	361500	124470	2911400	2400000	947240	57544000	50369000	43832000	51284000	20670000	24360000	105880000	130440000	99417000	17	17	17	31.3	31.3	31.3	81.215	0	39.128	432890000	38	11	7	3	5	3
111	A2A9C3-2;A2A9C3;Q6ZQA5;V9GXW1	A2A9C3-2;A2A9C3;Q6ZQA5	Protein SZT2	Szt2;mKIAA0467	sp|A2A9C3-2|SZT2_MOUSE Isoform 2 of Protein SZT2 OS=Mus musculus GN=Szt2;sp|A2A9C3|SZT2_MOUSE Protein SZT2 OS=Mus musculus GN=Szt2 PE=1 SV=1;tr|Q6ZQA5|Q6ZQA5_MOUSE MKIAA0467 protein (Fragment) OS=Mus musculus GN=mKIAA0467 PE=4 SV=2	4797700	16925000	2882500	15764000	141670000	5612600	14076000	16731000	6046500	1352400	28902	101960	17365	94963	853440	33811	84795	100790	36425	26428000	28930000	0	57910000	31201000	30914000	23370000	32976000	32409000	8	8	8	3.3	3.3	3.3	377.52	0	6.2398	224510000	11	2	5	1	3	5
112	A2A9C6;A2A9C8;Q9CY05;Q9DAY7;Q9D7W5	A2A9C6;A2A9C8;Q9CY05;Q9DAY7;Q9D7W5	Mediator of RNA polymerase II transcription subunit 8	Med8	tr|A2A9C6|A2A9C6_MOUSE Mediator of RNA polymerase II transcription subunit 8 (Fragment) OS=Mus musculus GN=Med8 PE=4 SV=1;tr|A2A9C8|A2A9C8_MOUSE Mediator of RNA polymerase II transcription subunit 8 OS=Mus musculus GN=Med8 PE=4 SV=1;tr|Q9CY05|Q9CY05_MOUSE	1678100	0	1634300	0	4703200	1670700	0	0	0	1614400	279680	0	272380	0	783860	278450	0	0	0	0	0	0	0	0	4851300	0	0	0	1	1	1	18.7	18.7	18.7	8.4753	0.0033003	2.1226	9686200	1	1	0	1	0	1
113	A2A9I0;O35166	A2A9I0;O35166	Golgi SNAP receptor complex member 2	Gosr2	tr|A2A9I0|A2A9I0_MOUSE Golgi SNAP receptor complex member 2 OS=Mus musculus GN=Gosr2 PE=4 SV=1;sp|O35166|GOSR2_MOUSE Golgi SNAP receptor complex member 2 OS=Mus musculus GN=Gosr2 PE=2 SV=2	145110000	58305000	28796000	396650000	227470000	63573000	297500000	171010000	75158000	162620000	16123000	6478400	3199600	44072000	25275000	7063600	33056000	19001000	8350900	226830000	176230000	160660000	401210000	295390000	172770000	389960000	272050000	220380000	6	6	6	47.3	47.3	47.3	19.571	0	84.955	1463600000	41	5	4	2	5	5
114	A2A9Q0	A2A9Q0	Fibronectin type-III domain-containing transmembrane protein C1orf233 homolog		sp|A2A9Q0|CA233_MOUSE Fibronectin type-III domain-containing transmembrane protein C1orf233 homolog OS=Mus musculus PE=2 SV=1	30762000	12091000	6092600	89846000	99798000	33686000	35479000	28379000	10005000	43267000	3845200	1511400	761580	11231000	12475000	4210800	4434800	3547300	1250700	41352000	30160000	0	112810000	75759000	63169000	28486000	37020000	0	6	6	6	29.1	29.1	29.1	24.416	0	17.211	346140000	21	2	4	2	3	4
115	Q8R320;A2A9Q2;Q8BHG1;A6PWC3;Q8CIJ0;Q8R1H1;Q9Z153;Q3V3G9	Q8R320;A2A9Q2;Q8BHG1;A6PWC3;Q8CIJ0;Q8R1H1	Nardilysin	Nrd1	tr|Q8R320|Q8R320_MOUSE Nardilysin, N-arginine dibasic convertase, NRD convertase 1 OS=Mus musculus GN=Nrd1 PE=2 SV=1;tr|A2A9Q2|A2A9Q2_MOUSE Nardilysin OS=Mus musculus GN=Nrd1 PE=1 SV=1;sp|Q8BHG1|NRDC_MOUSE Nardilysin OS=Mus musculus GN=Nrd1 PE=1 SV=1;tr|A6	241250000	118420000	52554000	192230000	189720000	106760000	467310000	275920000	122190000	28490000	3891100	1910000	847640	3100500	3060100	1721900	7537300	4450400	1970800	421690000	403010000	306330000	253590000	274780000	248400000	424860000	373400000	340960000	24	24	24	23.7	23.7	23.7	132.88	0	59.028	1766400000	92	17	17	11	20	16
116	Z4YKN2;A2A9T0;A2A9T0-2	Z4YKN2;A2A9T0;A2A9T0-2	TANK-binding kinase 1-binding protein 1	Tbkbp1	tr|Z4YKN2|Z4YKN2_MOUSE TANK-binding kinase 1-binding protein 1 OS=Mus musculus GN=Tbkbp1 PE=4 SV=1;sp|A2A9T0|TBKB1_MOUSE TANK-binding kinase 1-binding protein 1 OS=Mus musculus GN=Tbkbp1 PE=1 SV=1;sp|A2A9T0-2|TBKB1_MOUSE Isoform 2 of TANK-binding kinase 1-	0	2436700	0	3554200	0	0	5888800	14030000	789730	721620	0	65858	0	96058	0	0	159160	379200	21344	0	8449500	0	0	0	0	0	0	0	3	3	3	5.7	5.7	5.7	66.93	0.0014114	3.1377	26700000	4	0	1	0	1	0
117	Q8BTE1;A2A9W3;Q3UBZ5;A2A9W1;Q3UBZ5-2	Q8BTE1;A2A9W3;Q3UBZ5;A2A9W1	MIF4G domain-containing protein	Mif4gd	tr|Q8BTE1|Q8BTE1_MOUSE MIF4G domain containing, isoform CRA_e OS=Mus musculus GN=Mif4gd PE=2 SV=1;tr|A2A9W3|A2A9W3_MOUSE MIF4G domain-containing protein OS=Mus musculus GN=Mif4gd PE=4 SV=1;sp|Q3UBZ5|MI4GD_MOUSE MIF4G domain-containing protein OS=Mus muscul	21819000	25787000	7528300	29897000	14471000	4075400	57821000	47601000	8579900	19780000	1983500	2344300	684390	2717900	1315500	370490	5256500	4327400	779990	37415000	59489000	0	39512000	17786000	24921000	40040000	48559000	33174000	5	5	5	38.8	38.8	38.8	19.171	0	5.5977	217580000	18	2	3	2	4	2
118	A2A9W7;Q8BMI3;S4R2D2;A2A9W5;Q3UE19;Q3TVV9;Q6P5E6	A2A9W7;Q8BMI3;S4R2D2	ADP-ribosylation factor-binding protein GGA3	Gga3	tr|A2A9W7|A2A9W7_MOUSE ADP-ribosylation factor-binding protein GGA3 OS=Mus musculus GN=Gga3 PE=4 SV=1;sp|Q8BMI3|GGA3_MOUSE ADP-ribosylation factor-binding protein GGA3 OS=Mus musculus GN=Gga3 PE=2 SV=2;tr|S4R2D2|S4R2D2_MOUSE ADP-ribosylation factor-binding	175310000	92508000	39311000	372500000	274410000	220830000	337950000	223200000	146800000	62761000	5843600	3083600	1310400	12417000	9147000	7361000	11265000	7440000	4893500	296040000	308870000	280890000	477190000	365700000	416570000	365060000	357190000	405610000	15	15	14	38.3	38.3	37.2	70.192	0	95.919	1882800000	58	11	8	4	11	11
119	A2A9Y7;Q6A152	A2A9Y7;Q6A152	Cytochrome P450 4X1	Cyp4x1	tr|A2A9Y7|A2A9Y7_MOUSE Cytochrome P450 4X1 OS=Mus musculus GN=Cyp4x1 PE=3 SV=1;sp|Q6A152|CP4X1_MOUSE Cytochrome P450 4X1 OS=Mus musculus GN=Cyp4x1 PE=1 SV=1	10590000	3773700	2372700	3799600	4193600	1892500	32032000	20859000	12155000	3819500	441250	157240	98863	158320	174730	78852	1334700	869140	506450	0	0	0	13423000	12113000	0	17453000	0	16564000	4	4	4	9.4	9.4	9.4	55.535	0.0011351	3.224	91668000	6	1	2	1	2	2
120	A2AA85;Q6NXN1-2;Q6NXN1	A2AA85;Q6NXN1-2;Q6NXN1	SUZ domain-containing protein 1	Szrd1	tr|A2AA85|A2AA85_MOUSE SUZ domain-containing protein 1 (Fragment) OS=Mus musculus GN=Szrd1 PE=1 SV=1;sp|Q6NXN1-2|SZRD1_MOUSE Isoform 2 of SUZ domain-containing protein 1 OS=Mus musculus GN=Szrd1;sp|Q6NXN1|SZRD1_MOUSE SUZ domain-containing protein 1 OS=Mus	0	0	0	0	0	0	3492900	3004600	1415100	879180	0	0	0	0	0	0	388110	333850	157230	0	0	0	0	0	0	0	0	4950100	1	1	1	13	13	13	16.277	0.0034157	2.0547	7912600	2	0	0	0	0	0
121	A2AAE1;A2AAE1-2;A2AAE1-6;A2AAE1-3;A2AAE1-4;F6YAT5;A2AB97;F6RPM4;Q8CDG7;A2AAE1-5;F6YB09;D6RI50	A2AAE1;A2AAE1-2;A2AAE1-6;A2AAE1-3;A2AAE1-4	Uncharacterized protein KIAA1109	Kiaa1109	sp|A2AAE1|K1109_MOUSE Uncharacterized protein KIAA1109 OS=Mus musculus GN=Kiaa1109 PE=1 SV=4;sp|A2AAE1-2|K1109_MOUSE Isoform 2 of Uncharacterized protein KIAA1109 OS=Mus musculus GN=Kiaa1109;sp|A2AAE1-6|K1109_MOUSE Isoform 6 of Uncharacterized protein KIAA	246450000	173320000	75254000	545720000	284900000	180120000	579030000	392010000	294320000	10658000	947890	666630	289440	2098900	1095800	692780	2227000	1507700	1132000	433930000	579950000	404220000	534110000	410640000	446060000	739240000	624580000	771950000	69	69	69	19.1	19.1	19.1	555.36	0	113.61	2771100000	148	42	42	21	44	38
122	A2AAN2;Q8BMA6;Q8K258	A2AAN2;Q8BMA6	Signal recognition particle subunit SRP68	Srp68	tr|A2AAN2|A2AAN2_MOUSE Signal recognition particle subunit SRP68 OS=Mus musculus GN=Srp68 PE=3 SV=1;sp|Q8BMA6|SRP68_MOUSE Signal recognition particle subunit SRP68 OS=Mus musculus GN=Srp68 PE=2 SV=2	493130000	131440000	75499000	441200000	291400000	174340000	304960000	267800000	147850000	55419000	11741000	3129600	1797600	10505000	6938000	4150900	7261000	6376300	3520200	416090000	425200000	418270000	321650000	345440000	353220000	325170000	350660000	406610000	22	22	22	47.4	47.4	47.4	65.952	0	131.58	2327600000	111	20	18	12	20	18
123	A2AAU3;Q6DFV5-2;Q6DFV5;Q6DFV5-3;A2AAU5	A2AAU3;Q6DFV5-2;Q6DFV5;Q6DFV5-3;A2AAU5	Probable helicase with zinc finger domain	Helz	tr|A2AAU3|A2AAU3_MOUSE Probable helicase with zinc finger domain OS=Mus musculus GN=Helz PE=4 SV=1;sp|Q6DFV5-2|HELZ_MOUSE Isoform 2 of Probable helicase with zinc finger domain OS=Mus musculus GN=Helz;sp|Q6DFV5|HELZ_MOUSE Probable helicase with zinc finger	5967400	8568400	3776600	12291000	17039000	13786000	8272700	2442000	1382200	885850	71896	103230	45501	148080	205290	166100	99671	29421	16654	19356000	28907000	0	14556000	25152000	29341000	18466000	0	0	5	5	5	5	5	5	182.04	0.0017769	2.5924	73525000	9	2	3	2	4	4
124	Q3UNZ6;A2AB59-2;A2AB59	Q3UNZ6;A2AB59-2;A2AB59	Rho GTPase-activating protein 27	Arhgap27	tr|Q3UNZ6|Q3UNZ6_MOUSE Putative uncharacterized protein (Fragment) OS=Mus musculus GN=Arhgap27 PE=2 SV=1;sp|A2AB59-2|RHG27_MOUSE Isoform 2 of Rho GTPase-activating protein 27 OS=Mus musculus GN=Arhgap27;sp|A2AB59|RHG27_MOUSE Rho GTPase-activating protein 2	2245200	2060500	2424400	5037800	7462900	3460100	8561500	7587400	5336200	1636200	83154	76316	89794	186590	276400	128150	317090	281010	197640	0	0	0	0	0	0	0	0	13554000	2	2	2	3.2	3.2	3.2	61.036	0.0082946	1.5422	44176000	4	1	2	2	1	1
125	Q6PFC0;Q8BXD8;A2ABG4	Q6PFC0;Q8BXD8;A2ABG4		Tbc1d16	tr|Q6PFC0|Q6PFC0_MOUSE TBC1 domain family, member 16 OS=Mus musculus GN=Tbc1d16 PE=2 SV=1;tr|Q8BXD8|Q8BXD8_MOUSE Putative uncharacterized protein OS=Mus musculus GN=Tbc1d16 PE=2 SV=1;tr|A2ABG4|A2ABG4_MOUSE Protein Tbc1d16 OS=Mus musculus GN=Tbc1d16 PE=4 SV	2210600	1397300	0	4434800	3085400	2800500	12392000	0	0	731130	61405	38813	0	123190	85705	77791	344230	0	0	0	0	0	0	0	0	27742000	0	0	1	1	1	1.6	1.6	1.6	86.406	0	5.2845	26321000	5	1	1	0	1	1
126	Q5NC75;A2ABG6;Q6P5G3-2;Q6P5G3;Q8BZY2;Q5NC76;Q8C1B4;Q8BKW1	Q5NC75;A2ABG6;Q6P5G3-2;Q6P5G3;Q8BZY2;Q5NC76;Q8C1B4	MBT domain-containing protein 1	Mbtd1	tr|Q5NC75|Q5NC75_MOUSE MBT domain-containing protein 1 OS=Mus musculus GN=Mbtd1 PE=1 SV=1;tr|A2ABG6|A2ABG6_MOUSE MBT domain-containing protein 1 OS=Mus musculus GN=Mbtd1 PE=1 SV=1;sp|Q6P5G3-2|MBTD1_MOUSE Isoform 2 of MBT domain-containing protein 1 OS=Mus	6874100	3250500	5151000	32143000	31418000	8762400	11095000	0	0	4112200	286420	135440	214620	1339300	1309100	365100	462280	0	0	10734000	18962000	30916000	45143000	37977000	21184000	0	0	0	4	4	3	11.5	11.5	9.7	48.169	0	7.4222	98694000	5	3	2	2	4	4
127	A2ABV5;A2BDP0;A2BDN7;A2ABV5-3;A2ABV5-2	A2ABV5;A2BDP0	Mediator of RNA polymerase II transcription subunit 14	Med14	sp|A2ABV5|MED14_MOUSE Mediator of RNA polymerase II transcription subunit 14 OS=Mus musculus GN=Med14 PE=1 SV=1;tr|A2BDP0|A2BDP0_MOUSE Mediator of RNA polymerase II transcription subunit 14 OS=Mus musculus GN=Med14 PE=4 SV=1	14093000	8804500	4672300	55536000	34635000	34468000	5981000	1879000	3064200	2146500	185440	115850	61477	730730	455720	453530	78698	24723	40319	26211000	35143000	21325000	59846000	57174000	97473000	11140000	8248300	9884600	8	8	8	9.2	9.2	9.2	160.96	0	13.768	163130000	20	4	3	3	8	6
128	A2ABY3;Q3TLU0;Q540F5;Q3USD5;Q922E4;Q9CTB5	A2ABY3;Q3TLU0;Q540F5;Q3USD5;Q922E4	Ethanolamine-phosphate cytidylyltransferase	Pcyt2	tr|A2ABY3|A2ABY3_MOUSE Ethanolamine-phosphate cytidylyltransferase OS=Mus musculus GN=Pcyt2 PE=4 SV=1;tr|Q3TLU0|Q3TLU0_MOUSE Putative uncharacterized protein OS=Mus musculus GN=Pcyt2 PE=2 SV=1;tr|Q540F5|Q540F5_MOUSE CTP:ethanolaminephosphate cytidylyltrans	386400000	155500000	139240000	413700000	656390000	350360000	685510000	539730000	173380000	134620000	14861000	5980600	5355400	15912000	25246000	13475000	26366000	20759000	6668300	501610000	474430000	615730000	441670000	592560000	517030000	589040000	528810000	452270000	15	15	15	37.6	37.6	37.6	43.446	0	131.48	3500200000	112	11	11	9	11	11
129	Q61833;A2ACG7;Q3U505;Q9DBG6	Q61833;A2ACG7;Q3U505;Q9DBG6	Dolichyl-diphosphooligosaccharide--protein glycosyltransferase subunit 2	Rpn2	tr|Q61833|Q61833_MOUSE Ribophorin OS=Mus musculus GN=Rpn2 PE=2 SV=1;tr|A2ACG7|A2ACG7_MOUSE Dolichyl-diphosphooligosaccharide--protein glycosyltransferase subunit 2 OS=Mus musculus GN=Rpn2 PE=4 SV=1;tr|Q3U505|Q3U505_MOUSE Putative uncharacterized protein (F	1557300000	733470000	729260000	3082500000	3083100000	2214200000	2290800000	1442200000	931810000	553950000	53702000	25292000	25147000	106290000	106310000	76351000	78993000	49730000	32131000	1877400000	2187600000	2534800000	2855000000	3013600000	3330900000	2084000000	2156300000	2102800000	22	22	22	43	43	43	66.301	0	323.31	16065000000	313	19	19	18	19	22
130	Q8C8D9;A2ACH6;Q544D4;P82347	Q8C8D9;A2ACH6;Q544D4;P82347	Delta-sarcoglycan	Sgcd	tr|Q8C8D9|Q8C8D9_MOUSE Sarcoglycan, delta (Dystrophin-associated glycoprotein), isoform CRA_b OS=Mus musculus GN=Sgcd PE=2 SV=1;tr|A2ACH6|A2ACH6_MOUSE Delta-sarcoglycan OS=Mus musculus GN=Sgcd PE=4 SV=1;tr|Q544D4|Q544D4_MOUSE Sarcoglycan, delta (Dystrophin	12464000	4278500	1874900	0	705800	0	32190000	28731000	0	7295000	1133100	388960	170450	0	64164	0	2926400	2611900	0	18053000	20272000	0	0	0	0	27266000	56569000	0	2	2	2	13.3	13.3	13.3	17.878	0.00085288	3.2594	80245000	4	2	2	1	0	1
131	A2ACJ2;Q9D7M0	A2ACJ2;Q9D7M0	Fanconi anemia-associated protein of 100 kDa	Faap100;2310003H01Rik	sp|A2ACJ2|FP100_MOUSE Fanconi anemia-associated protein of 100 kDa OS=Mus musculus GN=Faap100 PE=2 SV=1;tr|Q9D7M0|Q9D7M0_MOUSE Putative uncharacterized protein OS=Mus musculus GN=2310003H01Rik PE=2 SV=1	1731600	4228800	1128500	2524600	4126500	3015000	8612300	15002000	20815000	1492300	42234	103140	27525	61576	100650	73538	210060	365910	507680	0	25552000	0	0	0	0	20437000	26366000	33117000	3	3	3	6	6	6	94.28	0.0012721	3.1732	61185000	6	1	2	1	1	1
132	A2ACL9;Q62443;Q3UST4	A2ACL9;Q62443;Q3UST4	Neuronal pentraxin-1	Nptx1	tr|A2ACL9|A2ACL9_MOUSE Neuronal pentraxin 1 OS=Mus musculus GN=Nptx1 PE=2 SV=1;sp|Q62443|NPTX1_MOUSE Neuronal pentraxin-1 OS=Mus musculus GN=Nptx1 PE=2 SV=1;tr|Q3UST4|Q3UST4_MOUSE Putative uncharacterized protein (Fragment) OS=Mus musculus GN=Nptx1 PE=2 SV	943290000	297970000	290870000	578810000	585420000	336610000	2957100000	1287600000	860550000	313010000	36280000	11461000	11187000	22262000	22516000	12947000	113730000	49525000	33098000	1411300000	1119600000	1394400000	735580000	781320000	702940000	2122700000	2083000000	2260400000	16	16	16	35.6	35.6	35.6	47.117	0	323.31	8138200000	218	14	13	11	12	12
133	A4FUW1;A2ACM0;Q8K4Q0;Q8K4Q0-2;E9PXZ5;Q8K4Q0-3;Q6ZPU3;F7BQS0;Q8K4Q0-5;F7CN67;Q8K4Q0-4;A7MAY7;F6U5L3;F7B6I3	A4FUW1;A2ACM0;Q8K4Q0;Q8K4Q0-2	Regulatory-associated protein of mTOR	Rptor	tr|A4FUW1|A4FUW1_MOUSE 4932417H02Rik protein (Fragment) OS=Mus musculus GN=Rptor PE=2 SV=1;tr|A2ACM0|A2ACM0_MOUSE Regulatory-associated protein of mTOR OS=Mus musculus GN=Rptor PE=1 SV=1;sp|Q8K4Q0|RPTOR_MOUSE Regulatory-associated protein of mTOR OS=Mus mu	414680000	194280000	117210000	449350000	482280000	223510000	769370000	584030000	316820000	52229000	6098200	2857100	1723700	6608200	7092300	3286900	11314000	8588600	4659100	646650000	681910000	736270000	466350000	505880000	567740000	837530000	818180000	691610000	34	34	34	35.7	35.7	35.7	149.24	0	137.41	3551500000	191	23	22	15	25	25
134	Q8K1G9;A2ACQ1;A2ACP9	Q8K1G9;A2ACQ1		Dhx35	tr|Q8K1G9|Q8K1G9_MOUSE DEAH (Asp-Glu-Ala-His) box polypeptide 35 OS=Mus musculus GN=Dhx35 PE=2 SV=1;tr|A2ACQ1|A2ACQ1_MOUSE Protein Dhx35 OS=Mus musculus GN=Dhx35 PE=4 SV=1	13792000	6168400	2052400	62283000	37676000	12643000	19117000	13375000	10703000	5080300	394070	176240	58640	1779500	1076500	361240	546190	382150	305800	27068000	27122000	0	44641000	34011000	45967000	37031000	31546000	56474000	6	6	6	10.5	10.5	10.5	75.876	0	10.005	177810000	12	3	3	1	4	6
135	A2ACV6;E1U8D0;Q69ZW6;Q8CBB8	A2ACV6;E1U8D0	Protein SOGA1;N-terminal form;C-terminal 80 kDa form	Soga1	tr|A2ACV6|A2ACV6_MOUSE Protein SOGA1 OS=Mus musculus GN=Soga1 PE=4 SV=1;sp|E1U8D0|SOGA1_MOUSE Protein SOGA1 OS=Mus musculus GN=Soga1 PE=1 SV=3	26468000	4181900	9993700	33451000	25712000	22226000	8420400	11871000	7883500	1329300	234230	37008	88440	296030	227540	196690	74517	105050	69765	25879000	35377000	0	32674000	38786000	43060000	14143000	16607000	25012000	9	7	7	6.5	5.6	5.6	183.14	0	9.9702	150210000	11	5	2	3	6	4
136	A2AD03;Q9QXG2;Q3UR39;Q8CBI2;Q9QZD5	A2AD03;Q9QXG2;Q3UR39;Q8CBI2	Rab proteins geranylgeranyltransferase component A 1	Chm	tr|A2AD03|A2AD03_MOUSE Rab proteins geranylgeranyltransferase component A 1 OS=Mus musculus GN=Chm PE=4 SV=1;sp|Q9QXG2|RAE1_MOUSE Rab proteins geranylgeranyltransferase component A 1 OS=Mus musculus GN=Chm PE=2 SV=1;tr|Q3UR39|Q3UR39_MOUSE Rab proteins gera	186090000	66221000	45586000	279290000	250240000	157010000	322470000	132530000	80689000	47504000	5815300	2069400	1424500	8727900	7820000	4906500	10077000	4141700	2521500	179040000	245620000	223400000	138160000	156000000	172130000	311870000	287540000	367600000	10	10	10	18	18	18	73.663	0	44.275	1520100000	47	8	9	6	8	9
137	A2ADA5;A2ADA5-3;A2ADA5-2	A2ADA5;A2ADA5-3;A2ADA5-2	tRNA pseudouridine synthase-like 1	Pusl1	sp|A2ADA5|PUSL1_MOUSE tRNA pseudouridine synthase-like 1 OS=Mus musculus GN=Pusl1 PE=2 SV=1;sp|A2ADA5-3|PUSL1_MOUSE Isoform 3 of tRNA pseudouridine synthase-like 1 OS=Mus musculus GN=Pusl1;sp|A2ADA5-2|PUSL1_MOUSE Isoform 2 of tRNA pseudouridine synthase-li	11533000	9451100	10152000	20226000	7442700	14144000	20633000	23600000	10469000	8510000	768860	630080	676780	1348400	496180	942930	1375500	1573300	697930	15951000	23997000	49412000	36534000	19002000	40517000	28066000	36398000	25262000	3	3	3	15.5	15.5	15.5	31.992	0	8.1607	127650000	14	3	3	3	3	2
138	A2ADA6;Q6NXL5;Q3UH98;Q4QQN0;Q8C8T5	A2ADA6;Q6NXL5;Q3UH98;Q4QQN0		Acap3	tr|A2ADA6|A2ADA6_MOUSE Protein Acap3 OS=Mus musculus GN=Acap3 PE=4 SV=1;tr|Q6NXL5|Q6NXL5_MOUSE ArfGAP with coiled-coil, ankyrin repeat and PH domains 3 OS=Mus musculus GN=Acap3 PE=2 SV=1;tr|Q3UH98|Q3UH98_MOUSE Putative uncharacterized protein OS=Mus muscul	29267000	0	4445500	43582000	52793000	13682000	76650000	40499000	10320000	6164500	665160	0	101030	990490	1199800	310960	1742000	920440	234550	32768000	0	31313000	31393000	27805000	59824000	67378000	53100000	126530000	14	12	12	24.2	21.8	21.8	92.333	0	17.215	271240000	20	10	2	6	10	12
139	A2ADB1;A2ADB0;Q62504-3;Q62504-2;Q62504;Q3UV27	A2ADB1;A2ADB0;Q62504-3;Q62504-2;Q62504	Msx2-interacting protein	Spen	tr|A2ADB1|A2ADB1_MOUSE Msx2-interacting protein OS=Mus musculus GN=Spen PE=1 SV=1;tr|A2ADB0|A2ADB0_MOUSE Msx2-interacting protein OS=Mus musculus GN=Spen PE=1 SV=1;sp|Q62504-3|MINT_MOUSE Isoform 3 of Msx2-interacting protein OS=Mus musculus GN=Spen;sp|Q625	63990000	29844000	4795000	71217000	126190000	42186000	55432000	41518000	14663000	2260500	321560	149970	24095	357870	634110	211990	278550	208630	73683	72701000	61533000	51086000	82714000	133170000	113380000	58523000	0	0	10	10	10	3.6	3.6	3.6	395.98	0	10.761	449830000	15	7	7	3	7	9
140	A2ADE0;Z4YJW6;Q80TQ5;Q80TQ5-2;Q80TQ5-3	A2ADE0;Z4YJW6;Q80TQ5;Q80TQ5-2;Q80TQ5-3	Pleckstrin homology domain-containing family M member 2	Plekhm2	tr|A2ADE0|A2ADE0_MOUSE Pleckstrin homology domain-containing family M member 2 OS=Mus musculus GN=Plekhm2 PE=4 SV=1;tr|Z4YJW6|Z4YJW6_MOUSE Pleckstrin homology domain-containing family M member 2 OS=Mus musculus GN=Plekhm2 PE=4 SV=1;sp|Q80TQ5|PKHM2_MOUSE Pl	25987000	22275000	1435500	56466000	41388000	13484000	33940000	29993000	10783000	5358000	590620	506240	32625	1283300	940650	306460	771370	681650	245070	61843000	59891000	0	68176000	70564000	69726000	86703000	81089000	0	8	8	8	11.9	11.9	11.9	112.15	0	6.0686	235750000	17	5	5	1	6	8
141	A2ADF7;A2ADF7-2	A2ADF7;A2ADF7-2	Solute carrier family 25 member 34	Slc25a34	sp|A2ADF7|S2534_MOUSE Solute carrier family 25 member 34 OS=Mus musculus GN=Slc25a34 PE=2 SV=1;sp|A2ADF7-2|S2534_MOUSE Isoform 2 of Solute carrier family 25 member 34 OS=Mus musculus GN=Slc25a34	18833000	945150	0	35052000	27193000	2636800	0	0	0	5291300	1177100	59072	0	2190700	1699600	164800	0	0	0	0	0	0	33070000	33656000	0	0	0	0	5	5	5	20.4	20.4	20.4	33.778	0.00086555	3.5407	84660000	5	1	1	0	3	4
142	F6TBV1;F6WHL0;A2ADH1;Q9CQY5-2;Q9CQY5-3;Q9CQY5	F6TBV1;F6WHL0;A2ADH1;Q9CQY5-2;Q9CQY5-3;Q9CQY5	Magnesium transporter protein 1	Magt1	tr|F6TBV1|F6TBV1_MOUSE Magnesium transporter protein 1 (Fragment) OS=Mus musculus GN=Magt1 PE=4 SV=1;tr|F6WHL0|F6WHL0_MOUSE Magnesium transporter protein 1 (Fragment) OS=Mus musculus GN=Magt1 PE=4 SV=1;tr|A2ADH1|A2ADH1_MOUSE Magnesium transporter protein 1	27108000	8242500	2755200	57364000	54563000	24133000	55041000	83708000	24848000	19868000	1594600	484850	162070	3374300	3209600	1419600	3237700	4924000	1461600	46861000	53331000	28402000	16044000	42166000	62344000	67103000	64023000	55918000	6	6	6	19.2	19.2	19.2	35.154	0	8.4951	337760000	16	5	2	2	4	4
143	A2ADL9;Q63ZW7-4;Q63ZW7-3;Q63ZW7-2;Q63ZW7;A2ADS6;Q3UGL9	A2ADL9;Q63ZW7-4;Q63ZW7-3;Q63ZW7-2;Q63ZW7	InaD-like protein	Inadl	tr|A2ADL9|A2ADL9_MOUSE InaD-like (Drosophila) OS=Mus musculus GN=Inadl PE=2 SV=1;sp|Q63ZW7-4|INADL_MOUSE Isoform 4 of InaD-like protein OS=Mus musculus GN=Inadl;sp|Q63ZW7-3|INADL_MOUSE Isoform 3 of InaD-like protein OS=Mus musculus GN=Inadl;sp|Q63ZW7-2|INA	598210000	223910000	193650000	1037100000	700610000	317000000	787100000	639820000	285240000	48803000	6104200	2284800	1976000	10583000	7149100	3234700	8031600	6528700	2910700	682020000	515700000	755200000	995780000	907660000	960060000	880980000	826160000	682010000	21	21	20	15.4	15.4	14.9	198.51	0	138.51	4782700000	197	18	18	13	20	17
144	A2ADR8;Q8R3G1	A2ADR8;Q8R3G1	Nuclear inhibitor of protein phosphatase 1	Ppp1r8	tr|A2ADR8|A2ADR8_MOUSE Nuclear inhibitor of protein phosphatase 1 OS=Mus musculus GN=Ppp1r8 PE=4 SV=1;sp|Q8R3G1|PP1R8_MOUSE Nuclear inhibitor of protein phosphatase 1 OS=Mus musculus GN=Ppp1r8 PE=1 SV=1	204520000	92826000	67501000	298060000	354630000	176450000	62075000	36460000	30949000	77851000	12031000	5460300	3970700	17533000	20860000	10380000	3651400	2144700	1820500	287470000	212890000	434660000	321480000	388350000	371040000	81509000	80385000	96821000	12	12	12	50.6	50.6	50.6	38.399	0	56.038	1323500000	44	10	7	4	10	11
145	A2ADY9	A2ADY9	Protein DDI1 homolog 2	Ddi2	sp|A2ADY9|DDI2_MOUSE Protein DDI1 homolog 2 OS=Mus musculus GN=Ddi2 PE=1 SV=1	104420000	57105000	10490000	321110000	138700000	55942000	157970000	83379000	49325000	39138000	4176700	2284200	419610	12845000	5548000	2237700	6318800	3335100	1973000	150180000	207360000	155360000	259910000	145830000	169510000	204190000	138870000	134170000	13	13	13	43.1	43.1	43.1	44.59	0	48.674	978440000	50	8	7	4	10	11
146	A2ADZ3;A2ADZ4;A2ADZ2;Q3UXT5;Q3UD58;Q6PAM1-2;Q6PAM1;A8Y5J8;Q8C5K1;Q8BWJ7;Q8VBT1	A2ADZ3;A2ADZ4;A2ADZ2;Q3UXT5;Q3UD58;Q6PAM1-2;Q6PAM1	Alpha-taxilin	Txlna	tr|A2ADZ3|A2ADZ3_MOUSE Alpha-taxilin (Fragment) OS=Mus musculus GN=Txlna PE=4 SV=1;tr|A2ADZ4|A2ADZ4_MOUSE Alpha-taxilin (Fragment) OS=Mus musculus GN=Txlna PE=4 SV=1;tr|A2ADZ2|A2ADZ2_MOUSE Alpha-taxilin (Fragment) OS=Mus musculus GN=Txlna PE=4 SV=1;tr|Q3UX	2728500	0	4652900	21872000	17880000	6942900	0	8841000	4818800	5644700	227380	0	387740	1822700	1490000	578570	0	736750	401570	0	0	0	0	24250000	0	0	0	0	4	3	3	23.8	20.6	20.6	26.933	0.0030708	2.2609	67737000	5	2	1	1	2	3
147	A2AE27;Q9DBT5	A2AE27;Q9DBT5	AMP deaminase 2	Ampd2	tr|A2AE27|A2AE27_MOUSE AMP deaminase 2 OS=Mus musculus GN=Ampd2 PE=1 SV=1;sp|Q9DBT5|AMPD2_MOUSE AMP deaminase 2 OS=Mus musculus GN=Ampd2 PE=1 SV=1	957980000	271140000	180730000	778870000	919960000	292990000	1645000000	1065800000	500340000	146950000	21289000	6025400	4016200	17308000	20444000	6510900	36557000	23684000	11119000	1138900000	910310000	1057800000	906060000	1022100000	676440000	1598000000	1346200000	1257700000	33	33	33	39.7	39.7	39.7	94.695	0	190.69	6612900000	247	26	28	18	26	27
148	Q9D7B3;A2AE33;P50149;A2AE32;F6QPU5	Q9D7B3;A2AE33;P50149;A2AE32	Guanine nucleotide-binding protein G(t) subunit alpha-2	Gnat2	tr|Q9D7B3|Q9D7B3_MOUSE Putative uncharacterized protein (Fragment) OS=Mus musculus GN=Gnat2 PE=2 SV=2;tr|A2AE33|A2AE33_MOUSE Guanine nucleotide binding protein, alpha transducing 2 OS=Mus musculus GN=Gnat2 PE=2 SV=1;sp|P50149|GNAT2_MOUSE Guanine nucleotide	0	2225500	0	0	7095100	0	3375800	2817100	0	861860	0	123640	0	0	394170	0	187540	156510	0	0	0	0	0	0	0	0	3591700	0	5	1	1	12	4.4	4.4	39.06	1	-2	15513000	1	3	4	4	3	4
149	A2AE38;Q80ZD8;Q80ZD8-2	A2AE38;Q80ZD8;Q80ZD8-2	Amphoterin-induced protein 1	Amigo1	tr|A2AE38|A2AE38_MOUSE Amphoterin-induced protein 1 (Fragment) OS=Mus musculus GN=Amigo1 PE=4 SV=1;sp|Q80ZD8|AMGO1_MOUSE Amphoterin-induced protein 1 OS=Mus musculus GN=Amigo1 PE=1 SV=1;sp|Q80ZD8-2|AMGO1_MOUSE Isoform 2 of Amphoterin-induced protein 1 OS=M	43171000	42050000	11014000	66531000	76125000	11067000	36003000	40120000	51512000	10788000	1233500	1201400	314670	1900900	2175000	316200	1028700	1146300	1471800	47824000	73897000	108900000	48387000	61352000	62755000	69881000	64383000	70041000	5	5	5	11	11	11	69.123	0.00044703	4.2496	377590000	11	4	3	2	4	3
150	A2AEE7;Q9R0M0-2;Q9R0M0;Q5DU39;F7BHW1;A2AFR6	A2AEE7;Q9R0M0-2;Q9R0M0;Q5DU39	Cadherin EGF LAG seven-pass G-type receptor 2	Celsr2	tr|A2AEE7|A2AEE7_MOUSE Cadherin EGF LAG seven-pass G-type receptor 2 OS=Mus musculus GN=Celsr2 PE=4 SV=1;sp|Q9R0M0-2|CELR2_MOUSE Isoform 2 of Cadherin EGF LAG seven-pass G-type receptor 2 OS=Mus musculus GN=Celsr2;sp|Q9R0M0|CELR2_MOUSE Cadherin EGF LAG sev	33974000	16706000	4737200	45696000	67000000	33154000	40553000	19504000	21611000	2021000	242670	119330	33837	326400	478570	236820	289660	139320	154370	54472000	54037000	0	61744000	67268000	75241000	41670000	45477000	58248000	13	13	13	6.6	6.6	6.6	316.98	0	14.968	282940000	20	8	7	2	10	10
151	A2AEG6;P35803	A2AEG6;P35803	Neuronal membrane glycoprotein M6-b	Gpm6b	tr|A2AEG6|A2AEG6_MOUSE Glycoprotein m6b, isoform CRA_g OS=Mus musculus GN=Gpm6b PE=1 SV=1;sp|P35803|GPM6B_MOUSE Neuronal membrane glycoprotein M6-b OS=Mus musculus GN=Gpm6b PE=1 SV=2	6531400000	2819300000	2741100000	4464600000	2585900000	2306100000	12582000000	6274000000	5081200000	3782200000	544290000	234940000	228430000	372050000	215490000	192180000	1048500000	522830000	423430000	7305300000	6060000000	6164200000	5992900000	3007900000	4865600000	10886000000	9814600000	9269400000	13	13	0	39.9	39.9	0	36.196	0	224.66	45386000000	302	13	11	7	12	13
152	A2AEM2;Q99LI2	A2AEM2;Q99LI2	Chloride channel CLIC-like protein 1	Clcc1	tr|A2AEM2|A2AEM2_MOUSE Chloride channel CLIC-like 1, isoform CRA_a OS=Mus musculus GN=Clcc1 PE=1 SV=1;sp|Q99LI2|CLCC1_MOUSE Chloride channel CLIC-like protein 1 OS=Mus musculus GN=Clcc1 PE=1 SV=1	58092000	32066000	11386000	98173000	86106000	52641000	176780000	69787000	37542000	18311000	1708600	943110	334870	2887400	2532500	1548300	5199500	2052600	1104200	88709000	104740000	53958000	125370000	65304000	103590000	83957000	110130000	70999000	9	9	9	22.4	22.4	22.4	61.239	0	21.52	622580000	28	5	6	4	5	5
153	Q3UIP1;A2AER4;Q9R0M8	Q3UIP1;A2AER4;Q9R0M8	UDP-galactose translocator	Slc35a2	tr|Q3UIP1|Q3UIP1_MOUSE Solute carrier family 35 (UDP-galactose transporter), member 2, isoform CRA_c OS=Mus musculus GN=Slc35a2 PE=2 SV=1;tr|A2AER4|A2AER4_MOUSE UDP-galactose translocator OS=Mus musculus GN=Slc35a2 PE=4 SV=1;sp|Q9R0M8|S35A2_MOUSE UDP-galac	33539000	25812000	13125000	24114000	34367000	18784000	20930000	13601000	17446000	14408000	2395600	1843700	937500	1722400	2454800	1341700	1495000	971500	1246100	0	110670000	0	0	0	0	0	0	0	1	1	1	7.2	7.2	7.2	40.765	0	8.9531	201720000	11	1	1	1	1	1
154	A2AER7;Q91VJ5;A2AER8;A2AER9	A2AER7;Q91VJ5;A2AER8	Polyglutamine-binding protein 1	Pqbp1	tr|A2AER7|A2AER7_MOUSE Pqbp1 protein OS=Mus musculus GN=Pqbp1 PE=2 SV=1;sp|Q91VJ5|PQBP1_MOUSE Polyglutamine-binding protein 1 OS=Mus musculus GN=Pqbp1 PE=1 SV=1;tr|A2AER8|A2AER8_MOUSE Polyglutamine-binding protein 1 (Fragment) OS=Mus musculus GN=Pqbp1 PE=4	98944000	67601000	27119000	102520000	74920000	93257000	10084000	21998000	11250000	50769000	9894400	6760100	2711900	10252000	7492000	9325700	1008400	2199800	1125000	139960000	189450000	90344000	147580000	82411000	201510000	16921000	24722000	22455000	6	6	6	26.2	26.2	26.2	30.597	0	66.814	507690000	33	6	6	5	5	4
155	A2AEV7;A2AEV8	A2AEV7		Ccdc120	tr|A2AEV7|A2AEV7_MOUSE Coiled-coil domain containing 120 OS=Mus musculus GN=Ccdc120 PE=1 SV=1	91048000	29785000	22374000	100750000	45017000	21665000	70639000	71645000	27652000	13349000	2529100	827360	621510	2798700	1250500	601810	1962200	1990100	768100	72779000	97830000	148470000	52747000	70103000	65448000	65840000	74873000	65651000	7	7	7	18.6	18.6	18.6	67.407	0	21.785	480580000	27	6	5	3	7	5
156	A2AEW8;A2AEW9;Q8VD04;A2AEW5;Q3T9D9;A2AEW6;Q3TZ55	A2AEW8;A2AEW9;Q8VD04;A2AEW5;Q3T9D9;A2AEW6	GRIP1-associated protein 1	Gripap1	tr|A2AEW8|A2AEW8_MOUSE GRIP1-associated protein 1 OS=Mus musculus GN=Gripap1 PE=1 SV=1;tr|A2AEW9|A2AEW9_MOUSE GRIP1-associated protein 1 OS=Mus musculus GN=Gripap1 PE=1 SV=1;sp|Q8VD04|GRAP1_MOUSE GRIP1-associated protein 1 OS=Mus musculus GN=Gripap1 PE=1 S	603230000	337420000	172550000	659280000	616170000	459430000	1220500000	735370000	240360000	85496000	10224000	5719000	2924500	11174000	10443000	7787000	20686000	12464000	4073900	846360000	822010000	676750000	636040000	722540000	672700000	817870000	678240000	695940000	35	35	35	48.1	48.1	48.1	95.912	0	237.07	5044300000	162	27	24	19	27	25
157	A2AEX0;Q03719	A2AEX0;Q03719	Potassium voltage-gated channel subfamily D member 1	Kcnd1	tr|A2AEX0|A2AEX0_MOUSE Potassium voltage-gated channel, Shal-related family, member 1 OS=Mus musculus GN=Kcnd1 PE=2 SV=1;sp|Q03719|KCND1_MOUSE Potassium voltage-gated channel subfamily D member 1 OS=Mus musculus GN=Kcnd1 PE=1 SV=1	2429500	2681000	1022900	2626600	1727400	1227600	7453700	17241000	4941200	1378400	80984	89366	34096	87554	57581	40921	248460	574710	164710	0	0	0	0	0	0	11657000	14837000	15066000	5	3	3	8.9	6.8	6.8	71.697	0	8.5938	41351000	7	3	2	1	2	2
158	A2AEX8;A2AEX6;P97447;A2AEY1;A2AEY2;A2AEX7;P97447-2;A2AEY0;A2AEX9;Q9DAH0;Q8CDC8;Q6P8P1;O70403	A2AEX8;A2AEX6;P97447;A2AEY1;A2AEY2;A2AEX7;P97447-2	Four and a half LIM domains protein 1	Fhl1	tr|A2AEX8|A2AEX8_MOUSE Four and a half LIM domains 1, isoform CRA_b OS=Mus musculus GN=Fhl1 PE=1 SV=1;tr|A2AEX6|A2AEX6_MOUSE Four and a half LIM domains protein 1 OS=Mus musculus GN=Fhl1 PE=1 SV=1;sp|P97447|FHL1_MOUSE Four and a half LIM domains protein 1	1153300000	538780000	391910000	655720000	706360000	343220000	1422000000	1173300000	670800000	371330000	60699000	28357000	20627000	34511000	37177000	18064000	74842000	61751000	35305000	1622200000	1762700000	1708000000	637540000	879540000	811220000	1594500000	1575500000	1914600000	15	15	15	53.7	53.7	53.7	33.563	0	104.45	7055300000	167	14	13	13	15	15
159	E9PZF7;A2AF28;A2AF35;A2AF34	E9PZF7;A2AF28;A2AF35;A2AF34		Slc25a53	tr|E9PZF7|E9PZF7_MOUSE Protein Slc25a53 OS=Mus musculus GN=Slc25a53 PE=3 SV=1;tr|A2AF28|A2AF28_MOUSE MCG115034, isoform CRA_c OS=Mus musculus GN=Slc25a53 PE=3 SV=1;tr|A2AF35|A2AF35_MOUSE Protein Slc25a53 (Fragment) OS=Mus musculus GN=Slc25a53 PE=3 SV=1;tr|	35738000	14991000	6159200	76574000	71492000	53170000	78063000	43979000	12866000	19652000	1786900	749550	307960	3828700	3574600	2658500	3903100	2199000	643280	52071000	61466000	53539000	73973000	77571000	79715000	65664000	45193000	24634000	8	8	8	29.4	29.4	29.4	34.409	0.0001533	4.9192	393030000	17	4	3	2	7	6
160	A2AF47;A2AF67;A2AF65;Q8CCF4	A2AF47;A2AF67	Dedicator of cytokinesis protein 11	Dock11	sp|A2AF47|DOC11_MOUSE Dedicator of cytokinesis protein 11 OS=Mus musculus GN=Dock11 PE=1 SV=1;tr|A2AF67|A2AF67_MOUSE Dedicator of cytokinesis protein 11 OS=Mus musculus GN=Dock11 PE=1 SV=1	92168000	58837000	28391000	49076000	59133000	41910000	233290000	151240000	102000000	6229400	703570	449140	216730	374630	451390	319920	1780900	1154500	778660	146680000	151480000	175200000	70313000	81829000	101910000	301100000	246880000	232360000	27	23	21	15.2	13.5	12.9	237.77	0	31.874	816050000	55	19	20	12	12	13
161	A2AF81;Q8N9S3-3;Q8N9S3;F6S1R2;Q8N9S3-2	A2AF81;Q8N9S3-3;Q8N9S3;F6S1R2;Q8N9S3-2	Activator of 90 kDa heat shock protein ATPase homolog 2	Ahsa2	tr|A2AF81|A2AF81_MOUSE Activator of 90 kDa heat shock protein ATPase homolog 2 (Fragment) OS=Mus musculus GN=Ahsa2 PE=4 SV=1;sp|Q8N9S3-3|AHSA2_MOUSE Isoform 3 of Activator of 90 kDa heat shock protein ATPase homolog 2 OS=Mus musculus GN=Ahsa2;sp|Q8N9S3|AHS	0	5367700	0	0	9016400	3099300	14503000	8648000	0	2708900	0	357850	0	0	601100	206620	966850	576530	0	0	17889000	0	0	0	0	0	0	0	2	1	1	9	6	6	22.402	0.0061373	1.7252	40634000	2	1	1	0	1	2
162	A2AFF6;O35638;Q3TG33;Q8BSB5;Q3TYZ1;Q3UKR7;O70576;F6XLF4;Q3UQG8	A2AFF6;O35638	Cohesin subunit SA-2	Stag2	tr|A2AFF6|A2AFF6_MOUSE Cohesin subunit SA-2 OS=Mus musculus GN=Stag2 PE=1 SV=1;sp|O35638|STAG2_MOUSE Cohesin subunit SA-2 OS=Mus musculus GN=Stag2 PE=1 SV=3	166560000	62616000	32858000	522170000	263920000	129670000	19438000	18317000	8825700	18005000	2449300	920820	483200	7679000	3881100	1906900	285850	269370	129790	348370000	256230000	136830000	412100000	227750000	374470000	25804000	34782000	15170000	30	25	25	28.5	24.6	24.6	145.7	0	50.067	1224400000	85	23	18	15	28	23
163	A2AFG8;Q6PGJ3;A2AFG7;P11627;Q9QYQ7;Q684Q2;F7A5H7;B7ZCD3;F6UIL7	A2AFG8;Q6PGJ3;A2AFG7;P11627;Q9QYQ7	Neural cell adhesion molecule L1	L1cam;L1	tr|A2AFG8|A2AFG8_MOUSE Neural cell adhesion molecule L1 OS=Mus musculus GN=L1cam PE=4 SV=1;tr|Q6PGJ3|Q6PGJ3_MOUSE L1 cell adhesion molecule OS=Mus musculus GN=L1cam PE=2 SV=1;tr|A2AFG7|A2AFG7_MOUSE Neural cell adhesion molecule L1 OS=Mus musculus GN=L1cam	1997100000	952360000	608580000	1441000000	1242500000	663390000	6832700000	4235800000	2664400000	299100000	28944000	13802000	8820000	20885000	18007000	9614300	99025000	61388000	38615000	3344100000	3170300000	3364000000	1756900000	1953900000	1802500000	6675600000	7000000000	6836000000	42	42	42	40.8	40.8	40.8	140.43	0	323.31	20638000000	532	36	38	25	32	33
164	A2AFI8;B9EI38;B1AV20;Q3UHF8;Q3UHE9;Q80XA6	A2AFI8;B9EI38;B1AV20;Q3UHF8;Q3UHE9;Q80XA6	RalBP1-associated Eps domain-containing protein 2	Reps2	tr|A2AFI8|A2AFI8_MOUSE RalBP1-associated Eps domain-containing protein 2 OS=Mus musculus GN=Reps2 PE=1 SV=1;tr|B9EI38|B9EI38_MOUSE RALBP1 associated Eps domain containing protein 2 OS=Mus musculus GN=Reps2 PE=1 SV=1;tr|B1AV20|B1AV20_MOUSE RalBP1-associated	101100000	56899000	21896000	229440000	68249000	39455000	222900000	145610000	85948000	24287000	2527600	1422500	547390	5735900	1706200	986390	5572400	3640200	2148700	178270000	212060000	191370000	177190000	154930000	154160000	364230000	417530000	334040000	13	12	12	29.5	28	28	70.483	0	51.92	971490000	41	9	7	5	9	6
165	A2AFQ0;Q7TMY8;Q4JG03;Q7TMY8-3;Q7TMY8-4;Q7TMY8-2;Q8BKX3;F6XP90;Q8C0G8;F6UYC1;Q9CU76;Q3TL29	A2AFQ0;Q7TMY8;Q4JG03;Q7TMY8-3;Q7TMY8-4;Q7TMY8-2	E3 ubiquitin-protein ligase HUWE1	Huwe1	tr|A2AFQ0|A2AFQ0_MOUSE E3 ubiquitin-protein ligase HUWE1 OS=Mus musculus GN=Huwe1 PE=1 SV=1;sp|Q7TMY8|HUWE1_MOUSE E3 ubiquitin-protein ligase HUWE1 OS=Mus musculus GN=Huwe1 PE=1 SV=5;tr|Q4JG03|Q4JG03_MOUSE Mcl-1 ubiquitin ligase OS=Mus musculus GN=Huwe1 PE	1789700000	861600000	568780000	2304500000	1938100000	973990000	2281500000	1748700000	1003600000	65390000	8688000	4182500	2761100	11187000	9408000	4728100	11075000	8488700	4871900	3053600000	2988100000	3229600000	2290700000	2436800000	2620800000	2757600000	2783700000	3040800000	106	106	80	32	32	24.4	482.69	0	323.31	13470000000	578	85	73	62	84	87
166	Q99N15;A2AFQ2;Q9CYT3;O08756	Q99N15;A2AFQ2;Q9CYT3;O08756	3-hydroxyacyl-CoA dehydrogenase type-2	Hsd17b10	tr|Q99N15|Q99N15_MOUSE 17beta-hydroxysteroid dehydrogenase type 10/short chain L-3-hydroxyacyl-CoA dehydrogenase OS=Mus musculus GN=Hsd17b10 PE=1 SV=1;tr|A2AFQ2|A2AFQ2_MOUSE 3-hydroxyacyl-CoA dehydrogenase type-2 OS=Mus musculus GN=Hsd17b10 PE=1 SV=1;tr|Q9	4273800000	1499100000	1727700000	8664900000	6257500000	3413500000	4592000000	3480200000	2269500000	2261100000	267110000	93691000	107980000	541560000	391090000	213350000	287000000	217520000	141840000	5009000000	4642200000	6294200000	8188300000	6876000000	6279300000	5424700000	5758600000	6180100000	18	18	18	82	82	82	27.273	0	323.31	36178000000	578	18	17	16	18	18
167	A2AFQ9;E9PUU4;Q8BX17;B2RQ83;B7ZN04;Q6KAS0;Q3TR97;F7CKD6	A2AFQ9;E9PUU4;Q8BX17;B2RQ83;B7ZN04;Q6KAS0;Q3TR97	Gem-associated protein 5	Gemin5	tr|A2AFQ9|A2AFQ9_MOUSE Gem-associated protein 5 OS=Mus musculus GN=Gemin5 PE=4 SV=1;tr|E9PUU4|E9PUU4_MOUSE Gem-associated protein 5 OS=Mus musculus GN=Gemin5 PE=4 SV=1;sp|Q8BX17|GEMI5_MOUSE Gem-associated protein 5 OS=Mus musculus GN=Gemin5 PE=2 SV=2;tr|B2	68309000	29266000	14911000	157060000	78600000	39767000	45023000	43583000	19874000	5395500	742490	318110	162070	1707100	854340	432250	489390	473730	216020	111390000	102350000	91141000	135310000	112700000	127350000	65893000	62486000	57543000	16	16	16	14.9	14.9	14.9	166.52	0	64.126	496390000	42	10	8	3	13	11
168	A2AFR3-2;A2AFR3-3;A2AFR3	A2AFR3-2;A2AFR3-3;A2AFR3	FERM and PDZ domain-containing protein 4	Frmpd4	sp|A2AFR3-2|FRPD4_MOUSE Isoform 2 of FERM and PDZ domain-containing protein 4 OS=Mus musculus GN=Frmpd4;sp|A2AFR3-3|FRPD4_MOUSE Isoform 3 of FERM and PDZ domain-containing protein 4 OS=Mus musculus GN=Frmpd4;sp|A2AFR3|FRPD4_MOUSE FERM and PDZ domain-contai	11042000	16749000	6177800	69056000	16985000	4215000	53833000	36068000	4805000	2880700	145290	220380	81287	908640	223490	55460	708330	474570	63224	42512000	50345000	36516000	0	0	0	72751000	60405000	0	12	11	11	13	12.5	12.5	140.49	0	8.0087	218930000	9	4	6	4	3	4
169	A2AFW6;Q9D050;D6RCZ1	A2AFW6;Q9D050		Mtch2	tr|A2AFW6|A2AFW6_MOUSE Mitochondrial carrier homolog 2 OS=Mus musculus GN=Mtch2 PE=3 SV=1;tr|Q9D050|Q9D050_MOUSE Mitochondrial carrier homolog 2 OS=Mus musculus GN=Mtch2 PE=2 SV=1	0	0	0	0	4457000	0	0	6414900	2287700	939980	0	0	0	0	318360	0	0	458210	163410	0	0	0	0	0	0	0	0	8002900	13	1	1	57.1	4.1	4.1	32.345	1	-2	13160000	1	12	12	12	12	13
170	A2AG30;Q3TYL4;Q3TY13;O89114	A2AG30;Q3TYL4;Q3TY13;O89114	DnaJ homolog subfamily B member 5	Dnajb5	tr|A2AG30|A2AG30_MOUSE DnaJ (Hsp40) homolog, subfamily B, member 5, isoform CRA_a OS=Mus musculus GN=Dnajb5 PE=4 SV=1;tr|Q3TYL4|Q3TYL4_MOUSE Putative uncharacterized protein OS=Mus musculus GN=Dnajb5 PE=2 SV=1;tr|Q3TY13|Q3TY13_MOUSE Putative uncharacterize	25727000	7149200	3895800	10604000	25561000	21673000	33386000	19376000	2319900	6508400	1118600	310830	169380	461050	1111400	942290	1451600	842450	100870	40900000	30865000	0	19446000	19777000	24172000	28670000	38833000	0	6	6	6	19.9	19.9	19.9	43.018	0	5.4041	149690000	10	5	3	1	3	4
171	A2AG36;Q562G0;B9EIU5;Q5DU55;Q9JJI6;F6YPG3;A0PJE1	A2AG36;Q562G0;B9EIU5;Q5DU55;Q9JJI6;F6YPG3	GPI ethanolamine phosphate transferase 3	Pigo	tr|A2AG36|A2AG36_MOUSE GPI ethanolamine phosphate transferase 3 OS=Mus musculus GN=Pigo PE=4 SV=1;tr|Q562G0|Q562G0_MOUSE GPI ethanolamine phosphate transferase 3 OS=Mus musculus GN=Pigo PE=2 SV=1;tr|B9EIU5|B9EIU5_MOUSE Phosphatidylinositol glycan anchor bi	19449000	22638000	19212000	52083000	29781000	35584000	9763000	11329000	24092000	4665200	405200	471630	400250	1085100	620430	741340	203390	236010	501920	32801000	49023000	73351000	75132000	61217000	70794000	25541000	37507000	58528000	10	10	10	14.2	14.2	14.2	116.44	0	40.038	223930000	29	4	7	5	6	5
172	A2AG50;A2AG50-2;A2AG51;A2AG50-3;Q3TS73;Q8C0A6	A2AG50;A2AG50-2;A2AG51;A2AG50-3;Q3TS73	MAP7 domain-containing protein 2	Map7d2	sp|A2AG50|MA7D2_MOUSE MAP7 domain-containing protein 2 OS=Mus musculus GN=Map7d2 PE=1 SV=1;sp|A2AG50-2|MA7D2_MOUSE Isoform 2 of MAP7 domain-containing protein 2 OS=Mus musculus GN=Map7d2;tr|A2AG51|A2AG51_MOUSE MAP7 domain-containing protein 2 (Fragment) OS	348820000	145090000	105300000	363560000	268240000	226110000	370660000	275450000	161030000	49223000	7583100	3154100	2289100	7903500	5831300	4915300	8057900	5988100	3500600	315980000	348810000	472800000	283940000	404260000	484880000	335900000	422160000	516720000	15	15	15	23.7	23.7	23.7	86.049	0	250.39	2264300000	73	13	11	10	12	12
173	B9EJ97;A2AG68;Q64430	B9EJ97;A2AG68;Q64430	Copper-transporting ATPase 1	Atp7a	tr|B9EJ97|B9EJ97_MOUSE Atp7a protein OS=Mus musculus GN=Atp7a PE=2 SV=1;tr|A2AG68|A2AG68_MOUSE Copper-transporting ATPase 1 OS=Mus musculus GN=Atp7a PE=1 SV=1;sp|Q64430|ATP7A_MOUSE Copper-transporting ATPase 1 OS=Mus musculus GN=Atp7a PE=1 SV=3	3826900	3694100	1842100	4804500	10118000	2140100	9285600	18000000	2520200	803300	54670	52773	26316	68636	144550	30573	132650	257140	36002	0	0	0	0	13689000	0	0	24502000	0	4	4	3	2.7	2.7	2.1	161.98	0.0033073	2.1419	56231000	10	2	1	1	3	2
174	B2RWZ9;A2AGI2;Q69ZI4;Q8BYM5;A2AGI3;A2AGI0;Q924X0	B2RWZ9;A2AGI2;Q69ZI4;Q8BYM5;A2AGI3;A2AGI0	Neuroligin-3	Nlgn3;mKIAA1480	tr|B2RWZ9|B2RWZ9_MOUSE Neuroligin 3 OS=Mus musculus GN=Nlgn3 PE=2 SV=1;tr|A2AGI2|A2AGI2_MOUSE Neuroligin-3 OS=Mus musculus GN=Nlgn3 PE=1 SV=1;tr|Q69ZI4|Q69ZI4_MOUSE MKIAA1480 protein (Fragment) OS=Mus musculus GN=mKIAA1480 PE=2 SV=1;sp|Q8BYM5|NLGN3_MOUSE N	651500000	301830000	161960000	957980000	761080000	391220000	1232000000	724860000	347850000	197510000	23268000	10780000	5784100	34213000	27182000	13972000	44000000	25888000	12423000	887780000	880180000	898680000	1066000000	1435600000	1011700000	1562100000	1441800000	1289800000	18	16	15	32.7	31.2	29.7	91.189	0	165.45	5530300000	161	15	14	12	16	16
175	A2AGR0;Q80U28-3;Q80U28-15;Q80U28;E9QN47;Q80U28-14;A2AGQ6;A2AGR1;A2AGQ4;A2AGQ3;A2AGQ8;Q80U28-2;A2AGQ7;A2AGQ5;A2AGQ2;A2AGQ9;Q80U28-8;Q80U28-4;Q80U28-11;Q80U28-7;Q80U28-6;Q80U28-5;Q80U28-9;Q80U28-10;A6PWP8;Q80U28-13;Q80U28-12;Q99LH6;A6PWP7	A2AGR0;Q80U28-3;Q80U28-15;Q80U28;E9QN47;Q80U28-14;A2AGQ6;A2AGR1;A2AGQ4;A2AGQ3;A2AGQ8;Q80U28-2;A2AGQ7;A2AGQ5;A2AGQ2;A2AGQ9;Q80U28-8;Q80U28-4;Q80U28-11;Q80U28-7;Q80U28-6;Q80U28-5;Q80U28-9;Q80U28-10;A6PWP8;Q80U28-13;Q80U28-12	MAP kinase-activating death domain protein	Madd	tr|A2AGR0|A2AGR0_MOUSE MAP kinase-activating death domain protein OS=Mus musculus GN=Madd PE=1 SV=1;sp|Q80U28-3|MADD_MOUSE Isoform 3 of MAP kinase-activating death domain protein OS=Mus musculus GN=Madd;sp|Q80U28-15|MADD_MOUSE Isoform 15 of MAP kinase-acti	1694900000	823110000	457200000	1488500000	1316400000	720510000	3700600000	2781400000	1427900000	184750000	21729000	10553000	5861500	19083000	16877000	9237300	47443000	35659000	18306000	2396900000	2280700000	2212400000	1722700000	1732700000	1705900000	3663400000	3568500000	3156500000	57	57	57	42.9	42.9	42.9	175.1	0	323.31	14410000000	462	48	51	37	44	46
176	A2AGS6;Q4QQM4	A2AGS6;Q4QQM4	Tumor protein p53-inducible protein 11	Trp53i11	tr|A2AGS6|A2AGS6_MOUSE Tumor protein p53-inducible protein 11 (Fragment) OS=Mus musculus GN=Trp53i11 PE=4 SV=1;sp|Q4QQM4|P5I11_MOUSE Tumor protein p53-inducible protein 11 OS=Mus musculus GN=Trp53i11 PE=2 SV=1	39750000	17638000	0	134200000	142010000	81007000	125390000	84012000	0	104000000	6625000	2939700	0	22367000	23668000	13501000	20898000	14002000	0	0	0	0	0	0	0	117850000	0	0	1	1	1	11.5	11.5	11.5	9.5972	0.00086319	3.4928	624000000	9	1	1	0	1	1
177	Q8BQW4;A2AH25;Q5FWK3;Q8C5A0;Q91Z04	Q8BQW4;A2AH25;Q5FWK3;Q8C5A0	Rho GTPase-activating protein 1	Arhgap1	tr|Q8BQW4|Q8BQW4_MOUSE Putative uncharacterized protein OS=Mus musculus GN=Arhgap1 PE=2 SV=1;tr|A2AH25|A2AH25_MOUSE Rho GTPase-activating protein 1 OS=Mus musculus GN=Arhgap1 PE=1 SV=1;sp|Q5FWK3|RHG01_MOUSE Rho GTPase-activating protein 1 OS=Mus musculus G	797850000	377030000	222430000	864220000	865250000	492810000	1305800000	973080000	496510000	213170000	26595000	12568000	7414400	28807000	28842000	16427000	43528000	32436000	16550000	1397000000	1336400000	1282400000	1015100000	1271200000	1272400000	1733800000	1614100000	1515900000	23	23	23	62.8	62.8	62.8	54.441	0	302.35	6395000000	167	18	16	12	18	18
178	Q8BSD9;A2AH59;A2AH60;Q8CIU1;P59280	Q8BSD9;A2AH59;A2AH60;Q8CIU1;P59280	Kelch-like protein 8	Klhl8	tr|Q8BSD9|Q8BSD9_MOUSE Putative uncharacterized protein OS=Mus musculus GN=Klhl8 PE=2 SV=1;tr|A2AH59|A2AH59_MOUSE Kelch-like protein 8 OS=Mus musculus GN=Klhl8 PE=4 SV=1;tr|A2AH60|A2AH60_MOUSE Kelch-like protein 8 OS=Mus musculus GN=Klhl8 PE=4 SV=1;tr|Q8CI	691580	496880	0	0	3881900	1812100	2883900	2187500	1188400	453180	23848	17134	0	0	133860	62486	99445	75430	40981	0	0	0	0	0	0	0	0	2710300	1	1	1	3.5	3.5	3.5	48.642	0.0068285	1.6148	13142000	3	1	1	0	0	1
179	Q543F1;A2AH85;Q6A0E3;O08810;G3UZ34;Q3U5Q3;Q3TMY8;Q7TMX4;G3UXK8;G3UZ25	Q543F1;A2AH85;Q6A0E3;O08810;G3UZ34;Q3U5Q3;Q3TMY8;Q7TMX4	116 kDa U5 small nuclear ribonucleoprotein component	Eftud2	tr|Q543F1|Q543F1_MOUSE Putative uncharacterized protein OS=Mus musculus GN=Eftud2 PE=2 SV=1;tr|A2AH85|A2AH85_MOUSE 116 kDa U5 small nuclear ribonucleoprotein component OS=Mus musculus GN=Eftud2 PE=4 SV=1;tr|Q6A0E3|Q6A0E3_MOUSE MKIAA0031 protein (Fragment)	2171800000	1047700000	788590000	5884300000	4182600000	2649800000	1172000000	869460000	428170000	355450000	40219000	19403000	14603000	108970000	77455000	49071000	21705000	16101000	7929000	3051200000	3287200000	3248100000	6012700000	5058800000	5594100000	1361200000	1351200000	1336000000	54	53	53	69.7	68.7	68.7	109.36	0	323.31	19195000000	574	45	43	36	51	53
180	A2AHB9;A2AHB8;Q6ZPR4;A2AHB7;C0KTP6;Q8C853;A2AHB6	A2AHB9;A2AHB8;Q6ZPR4;A2AHB7;C0KTP6;Q8C853	Potassium channel subfamily T member 1	Kcnt1	tr|A2AHB9|A2AHB9_MOUSE Potassium channel subfamily T member 1 OS=Mus musculus GN=Kcnt1 PE=4 SV=1;tr|A2AHB8|A2AHB8_MOUSE Potassium channel subfamily T member 1 OS=Mus musculus GN=Kcnt1 PE=4 SV=1;sp|Q6ZPR4|KCNT1_MOUSE Potassium channel subfamily T member 1 O	152390000	69218000	49482000	372890000	313720000	109660000	250590000	153240000	92139000	24051000	2344500	1064900	761270	5736700	4826400	1687100	3855200	2357500	1417500	225050000	273790000	345530000	328780000	335550000	263030000	261900000	286440000	320990000	23	23	19	24.6	24.6	21	139.5	0	100.28	1563300000	79	14	12	7	18	17
181	A2AHC3;A2AHC4;A2AHC3-2;F6Q2D3;F6QF29;F6W3X2;V9GXT0;V9GXD7	A2AHC3;A2AHC4;A2AHC3-2	Calmodulin-regulated spectrin-associated protein 1	Camsap1	sp|A2AHC3|CAMP1_MOUSE Calmodulin-regulated spectrin-associated protein 1 OS=Mus musculus GN=Camsap1 PE=1 SV=1;tr|A2AHC4|A2AHC4_MOUSE Calmodulin-regulated spectrin-associated protein 1 (Fragment) OS=Mus musculus GN=Camsap1 PE=4 SV=1;sp|A2AHC3-2|CAMP1_MOUSE	200560000	66921000	29558000	227480000	143900000	72208000	247120000	187920000	119900000	12702000	1966200	656090	289780	2230200	1410800	707920	2422700	1842400	1175400	328340000	267210000	263150000	178880000	194580000	148860000	347150000	320480000	294250000	25	25	25	22.1	22.1	22.1	175.89	0	53.682	1295600000	73	17	17	8	20	17
182	A2AHG0-3;A2AHG0;A2AHG0-2	A2AHG0-3;A2AHG0;A2AHG0-2	Leucine zipper putative tumor suppressor 3	Lzts3	sp|A2AHG0-3|LZTS3_MOUSE Isoform 3 of Leucine zipper putative tumor suppressor 3 OS=Mus musculus GN=Lzts3;sp|A2AHG0|LZTS3_MOUSE Leucine zipper putative tumor suppressor 3 OS=Mus musculus GN=Lzts3 PE=2 SV=1;sp|A2AHG0-2|LZTS3_MOUSE Isoform 2 of Leucine zipper	9108500	3355700	3370200	35085000	55607000	9098000	8320400	10056000	0	3268300	222160	81847	82199	855730	1356300	221900	202940	245280	0	26066000	37880000	0	35431000	65389000	31487000	19693000	13930000	0	5	5	5	12	12	12	62.278	0	7.9497	134000000	10	2	2	1	4	4
183	F6TKP4;A2AHG3;F6URE6;D3Z764;E9PV92;A2AHG4;E9QKW9;A2AHG2;Q6ZPK0-5;Q6ZPK0-7;Q6ZPK0-4;Q6ZPK0-9;Q6ZPK0-2;Q6ZPK0-6;Q6ZPK0-8;Q6ZPK0-3;Q6ZPK0	F6TKP4;A2AHG3;F6URE6;D3Z764;E9PV92;A2AHG4;E9QKW9;A2AHG2;Q6ZPK0-5;Q6ZPK0-7;Q6ZPK0-4;Q6ZPK0-9;Q6ZPK0-2;Q6ZPK0-6;Q6ZPK0-8;Q6ZPK0-3;Q6ZPK0	PHD finger protein 21A	Phf21a	tr|F6TKP4|F6TKP4_MOUSE PHD finger protein 21A (Fragment) OS=Mus musculus GN=Phf21a PE=4 SV=1;tr|A2AHG3|A2AHG3_MOUSE PHD finger protein 21A OS=Mus musculus GN=Phf21a PE=4 SV=1;tr|F6URE6|F6URE6_MOUSE PHD finger protein 21A (Fragment) OS=Mus musculus GN=Phf21	1871400	4861100	2220600	2860700	3162500	0	1387300	0	4293600	1377100	124760	324070	148040	190710	210830	0	92485	0	286240	0	12455000	0	0	0	0	0	0	0	2	2	2	12.1	12.1	12.1	26.246	0.0097415	1.4827	20657000	2	1	2	1	1	1
184	A2AHJ4-2;A2AHJ4;G3UXF9;G3UZT0;A2AHJ4-3	A2AHJ4-2;A2AHJ4	Bromodomain and WD repeat-containing protein 3	Brwd3	sp|A2AHJ4-2|BRWD3_MOUSE Isoform 2 of Bromodomain and WD repeat-containing protein 3 OS=Mus musculus GN=Brwd3;sp|A2AHJ4|BRWD3_MOUSE Bromodomain and WD repeat-containing protein 3 OS=Mus musculus GN=Brwd3 PE=2 SV=1	761920	514360	414010	5213200	6668000	3786700	2051700	937060	1084700	1128000	40101	27072	21790	274380	350950	199300	107990	49319	57091	0	0	0	0	0	0	0	0	2473700	3	1	1	12.8	6	6	31.091	0.00015378	4.9695	21432000	3	1	2	2	3	3
185	A2AHJ7;A2AHK0;Q80UP3;Q91YS0;Q05DE1;D6RHK9	A2AHJ7;A2AHK0;Q80UP3;Q91YS0	Diacylglycerol kinase;Diacylglycerol kinase zeta	Dgkz	tr|A2AHJ7|A2AHJ7_MOUSE Diacylglycerol kinase OS=Mus musculus GN=Dgkz PE=3 SV=1;tr|A2AHK0|A2AHK0_MOUSE Diacylglycerol kinase OS=Mus musculus GN=Dgkz PE=3 SV=1;sp|Q80UP3|DGKZ_MOUSE Diacylglycerol kinase zeta OS=Mus musculus GN=Dgkz PE=1 SV=2;tr|Q91YS0|Q91YS0	1520200000	924110000	577170000	910550000	995530000	438070000	3728300000	2417800000	1821700000	261440000	29808000	18120000	11317000	17854000	19520000	8589500	73103000	47407000	35720000	2080700000	2413300000	2642000000	887510000	1085800000	885750000	3213900000	3174300000	3555900000	28	28	25	34.6	34.6	31.8	105.9	0	305.52	13333000000	342	26	28	21	23	22
186	A2AHQ7;Q8BWJ3;Q6PE66;A2AHQ8;Q8BLC1	A2AHQ7;Q8BWJ3	Phosphorylase b kinase regulatory subunit alpha, liver isoform	Phka2	tr|A2AHQ7|A2AHQ7_MOUSE Phosphorylase b kinase regulatory subunit alpha, liver isoform OS=Mus musculus GN=Phka2 PE=1 SV=1;sp|Q8BWJ3|KPB2_MOUSE Phosphorylase b kinase regulatory subunit alpha, liver isoform OS=Mus musculus GN=Phka2 PE=1 SV=1	4696000	7145900	2451100	19180000	6822900	3649500	44198000	23187000	5511200	1980400	79594	121120	41544	325090	115640	61855	749120	393000	93410	10330000	18634000	0	27209000	17772000	16564000	53833000	31641000	25174000	6	5	5	5.9	5.4	5.4	133.81	0.0008617	3.458	116840000	12	3	5	1	3	2
187	A2AHW8;Q3V0G7-2;Q3V0G7	A2AHW8;Q3V0G7-2;Q3V0G7	GTPase-activating Rap/Ran-GAP domain-like protein 3	Garnl3	tr|A2AHW8|A2AHW8_MOUSE GTPase-activating Rap/Ran-GAP domain-like protein 3 OS=Mus musculus GN=Garnl3 PE=4 SV=1;sp|Q3V0G7-2|GARL3_MOUSE Isoform 2 of GTPase-activating Rap/Ran-GAP domain-like protein 3 OS=Mus musculus GN=Garnl3;sp|Q3V0G7|GARL3_MOUSE GTPase-a	74216000	46506000	5417700	45925000	61752000	15276000	136350000	132520000	112650000	12612000	1484300	930130	108350	918500	1235000	305520	2727100	2650300	2253000	68919000	111550000	105940000	72088000	56731000	56389000	102230000	145150000	239390000	13	13	13	20.3	20.3	20.3	111	0	51.167	630620000	31	9	9	1	7	7
188	Q6GTZ3;A2AHY3;P20067-2;P20067	Q6GTZ3;A2AHY3;P20067-2;P20067	DNA-binding protein inhibitor ID-1	Id1	tr|Q6GTZ3|Q6GTZ3_MOUSE Idb1 protein OS=Mus musculus GN=Id1 PE=2 SV=1;tr|A2AHY3|A2AHY3_MOUSE DNA-binding protein inhibitor ID-1 OS=Mus musculus GN=Id1 PE=4 SV=1;sp|P20067-2|ID1_MOUSE Isoform Short of DNA-binding protein inhibitor ID-1 OS=Mus musculus GN=Id1	38827000	4232700	0	9529400	26265000	17221000	28698000	16370000	14032000	22168000	5546700	604670	0	1361300	3752200	2460100	4099700	2338600	2004600	55205000	0	0	0	0	0	0	0	0	1	1	1	11.5	11.5	11.5	15.56	0.0061131	1.6943	155180000	5	1	1	0	1	1
189	A2AI08	A2AI08	Taperin	Tprn	sp|A2AI08|TPRN_MOUSE Taperin OS=Mus musculus GN=Tprn PE=1 SV=1	41003000	22369000	8503900	103130000	90983000	36833000	10452000	9670300	11781000	8582800	1051400	573580	218050	2644500	2332900	944420	268000	247960	302080	68720000	107450000	0	124690000	109310000	120640000	30710000	40844000	58821000	8	8	8	16.6	16.6	16.6	80.088	0	21.817	334730000	21	6	3	1	6	7
190	A2AI14;A2AI21;A2AI20;A2AI17;P35438;A2AI19;Q3TZ31	A2AI14;A2AI21;A2AI20;A2AI17;P35438;A2AI19;Q3TZ31	Glutamate receptor ionotropic, NMDA 1	Grin1	tr|A2AI14|A2AI14_MOUSE Glutamate receptor ionotropic, NMDA 1 OS=Mus musculus GN=Grin1 PE=4 SV=1;tr|A2AI21|A2AI21_MOUSE Glutamate receptor ionotropic, NMDA 1 OS=Mus musculus GN=Grin1 PE=4 SV=1;tr|A2AI20|A2AI20_MOUSE Glutamate receptor ionotropic, NMDA 1 OS=	619690000	315910000	214370000	1909200000	1734000000	925390000	458160000	361250000	157080000	115430000	10684000	5446700	3696100	32917000	29896000	15955000	7899300	6228400	2708300	1020400000	961920000	910040000	2001900000	1970300000	1847100000	628890000	593410000	524010000	30	30	1	35.1	35.1	1.2	106.12	0	138.22	6695000000	228	21	20	18	30	28
191	A2AI16;P35438-2	A2AI16;P35438-2	Glutamate receptor ionotropic, NMDA 1	Grin1	tr|A2AI16|A2AI16_MOUSE Glutamate receptor ionotropic, NMDA 1 OS=Mus musculus GN=Grin1 PE=4 SV=1;sp|P35438-2|NMDZ1_MOUSE Isoform 2 of Glutamate receptor ionotropic, NMDA 1 OS=Mus musculus GN=Grin1	0	0	0	16764000	14345000	0	0	0	0	555530	0	0	0	299360	256170	0	0	0	0	0	0	0	0	20823000	0	0	0	0	30	1	1	38.1	2.8	2.8	101.96	0.0030565	2.2025	31110000	1	21	20	18	30	28
192	Q3UZ62;A2AI52;Q80U87;Q3UQ26;Q3TQM7;Q58E42	Q3UZ62;A2AI52;Q80U87;Q3UQ26;Q3TQM7	Ubiquitin carboxyl-terminal hydrolase;Ubiquitin carboxyl-terminal hydrolase 8	Usp8	tr|Q3UZ62|Q3UZ62_MOUSE Ubiquitin carboxyl-terminal hydrolase OS=Mus musculus GN=Usp8 PE=2 SV=1;tr|A2AI52|A2AI52_MOUSE Ubiquitin carboxyl-terminal hydrolase OS=Mus musculus GN=Usp8 PE=1 SV=1;sp|Q80U87|UBP8_MOUSE Ubiquitin carboxyl-terminal hydrolase 8 OS=Mu	179800000	87901000	46370000	238140000	219590000	131460000	264290000	119520000	117470000	20655000	2644000	1292700	681920	3502100	3229200	1933200	3886700	1757700	1727500	284440000	292900000	330460000	243600000	235330000	322180000	293170000	240340000	320610000	21	21	21	24.7	24.7	24.7	122.65	0	59.587	1404500000	89	13	14	10	17	18
193	A2AI89;A2AI88;A2AI87;P18826-2;P18826;Q8CBA7;A2AI91;Q3UV91;Q8BSV5;Q3TQJ0	A2AI89;A2AI88;A2AI87;P18826-2;P18826;Q8CBA7;A2AI91;Q3UV91;Q8BSV5	Phosphorylase b kinase regulatory subunit alpha, skeletal muscle isoform	Phka1	tr|A2AI89|A2AI89_MOUSE Phosphorylase b kinase regulatory subunit alpha, skeletal muscle isoform OS=Mus musculus GN=Phka1 PE=4 SV=1;tr|A2AI88|A2AI88_MOUSE Phosphorylase b kinase regulatory subunit alpha, skeletal muscle isoform OS=Mus musculus GN=Phka1 PE=4	473010000	218990000	138130000	519420000	369820000	188130000	1476000000	947980000	536310000	73754000	7166900	3318100	2092900	7869900	5603400	2850400	22363000	14363000	8126000	695940000	678600000	899540000	594160000	546840000	650480000	1382800000	1243100000	1314300000	39	39	38	43.4	43.4	42.9	135.6	0	131.25	4867800000	184	29	26	19	25	26
194	Q8BUJ1;A2AIG3;E9Q1M5;V9GX32;Q3U8D5;Q3UDB5;P70428;A2AIG6;Q3UFQ0	Q8BUJ1;A2AIG3;E9Q1M5;V9GX32;Q3U8D5;Q3UDB5;P70428;A2AIG6;Q3UFQ0	Exostosin-2	Ext2	tr|Q8BUJ1|Q8BUJ1_MOUSE Putative uncharacterized protein OS=Mus musculus GN=Ext2 PE=2 SV=1;tr|A2AIG3|A2AIG3_MOUSE Exostosin-2 (Fragment) OS=Mus musculus GN=Ext2 PE=4 SV=1;tr|E9Q1M5|E9Q1M5_MOUSE Exostosin-2 OS=Mus musculus GN=Ext2 PE=4 SV=1;tr|V9GX32|V9GX32_	3182700	3709100	1937600	13098000	7814900	549730	0	0	0	2330200	244830	285320	149050	1007600	601150	42287	0	0	0	0	0	0	11037000	0	0	0	0	0	2	2	2	12.6	12.6	12.6	21.377	0.00044176	3.9993	30292000	3	1	2	1	2	1
195	A2AIG8-2;A2AIG8;Q8BYD1;A2AIG9	A2AIG8-2;A2AIG8	1-aminocyclopropane-1-carboxylate synthase-like protein 1	Accs	sp|A2AIG8-2|1A1L1_MOUSE Isoform 2 of 1-aminocyclopropane-1-carboxylate synthase-like protein 1 OS=Mus musculus GN=Accs;sp|A2AIG8|1A1L1_MOUSE 1-aminocyclopropane-1-carboxylate synthase-like protein 1 OS=Mus musculus GN=Accs PE=2 SV=1	0	0	0	2349700	848010	977560	7185100	8410400	2167600	664800	0	0	0	71204	25697	29623	217730	254860	65685	0	0	0	0	0	0	11047000	15429000	0	3	3	3	11.5	11.5	11.5	54.492	0.0017825	2.6319	21938000	4	0	0	0	1	1
196	Q8BNL6;A2AIH8;Q9D711;Q8C1Y5	Q8BNL6;A2AIH8;Q9D711;Q8C1Y5	Pirin	Pir	tr|Q8BNL6|Q8BNL6_MOUSE Putative uncharacterized protein OS=Mus musculus PE=2 SV=1;tr|A2AIH8|A2AIH8_MOUSE Pirin (Fragment) OS=Mus musculus GN=Pir PE=3 SV=1;sp|Q9D711|PIR_MOUSE Pirin OS=Mus musculus GN=Pir PE=2 SV=1;tr|Q8C1Y5|Q8C1Y5_MOUSE Putative uncharacte	7133600	0	1032900	7180700	7899800	1740200	17752000	9824800	498490	3790200	509540	0	73779	512900	564270	124300	1268000	701770	35606	0	0	0	7439400	0	0	17483000	0	0	4	4	4	21.5	21.5	21.5	22.643	0.00085409	3.2843	53063000	6	2	0	1	2	1
197	A2AII6;Q810Q1;Q8BHR8-2;Q8BHR8	A2AII6;Q810Q1;Q8BHR8-2;Q8BHR8	UPF0705 protein C11orf49 homolog	1110051M20Rik	tr|A2AII6|A2AII6_MOUSE Protein 1110051M20Rik OS=Mus musculus GN=1110051M20Rik PE=1 SV=1;tr|Q810Q1|Q810Q1_MOUSE 1110051M20Rik protein (Fragment) OS=Mus musculus GN=1110051M20Rik PE=2 SV=1;sp|Q8BHR8-2|CK049_MOUSE Isoform 2 of UPF0705 protein C11orf49 homolog	2781500	5670400	0	0	15727000	11230000	11961000	9167500	5687700	5185500	231790	472530	0	0	1310600	935850	996760	763960	473980	0	0	0	0	20109000	18346000	21962000	21653000	0	2	2	2	15.4	15.4	15.4	26.105	0	5.7614	62226000	6	1	1	0	0	2
198	A2AIL4	A2AIL4	NADH dehydrogenase (ubiquinone) complex I, assembly factor 6	Ndufaf6	sp|A2AIL4|NDUF6_MOUSE NADH dehydrogenase (ubiquinone) complex I, assembly factor 6 OS=Mus musculus GN=Ndufaf6 PE=3 SV=1	70583000	34419000	16101000	182930000	158370000	91106000	130710000	101270000	35745000	43223000	3714900	1811500	847430	9627800	8335100	4795000	6879400	5330200	1881300	104860000	109900000	104710000	256900000	204950000	215780000	133340000	169040000	117830000	11	11	11	41.7	41.7	41.7	38.362	0	21.623	821230000	36	7	8	7	10	9
199	A2AIS0;A2AIR9;A2AIR7;O55017;O55017-2;Q3UYN6;A2AIZ9	A2AIS0;A2AIR9;A2AIR7;O55017;O55017-2;Q3UYN6	Voltage-dependent N-type calcium channel subunit alpha-1B	Cacna1b	tr|A2AIS0|A2AIS0_MOUSE Voltage-dependent N-type calcium channel subunit alpha-1B OS=Mus musculus GN=Cacna1b PE=1 SV=1;tr|A2AIR9|A2AIR9_MOUSE Voltage-dependent N-type calcium channel subunit alpha-1B OS=Mus musculus GN=Cacna1b PE=1 SV=1;tr|A2AIR7|A2AIR7_MOU	38158000	7760000	1657800	46485000	212390000	13368000	123460000	61174000	31497000	5008900	356620	72523	15493	434440	1984900	124930	1153900	571720	294370	92462000	124800000	0	69019000	78525000	51274000	142400000	71668000	111970000	19	13	13	11.4	8.7	8.7	257.07	0	13.743	535950000	19	10	8	4	11	14
200	E9PZY8;A2AIV2;A2AIV2-2;Q8CFK9	E9PZY8;A2AIV2;A2AIV2-2;Q8CFK9	Protein virilizer homolog	1110037F02Rik;Kiaa1429	tr|E9PZY8|E9PZY8_MOUSE Protein 1110037F02Rik OS=Mus musculus GN=1110037F02Rik PE=1 SV=1;sp|A2AIV2|VIR_MOUSE Protein virilizer homolog OS=Mus musculus GN=Kiaa1429 PE=1 SV=1;sp|A2AIV2-2|VIR_MOUSE Isoform 2 of Protein virilizer homolog OS=Mus musculus GN=Kiaa	57090000	27034000	5418000	114050000	175190000	58292000	16881000	16053000	3914200	4347900	523770	248020	49706	1046300	1607200	534790	154870	147280	35910	100760000	89618000	55719000	93013000	258430000	119780000	33131000	32737000	22222000	15	15	14	10.4	10.4	10	207.17	0	29.586	473920000	32	11	8	4	13	15
201	A2AIX0;Q3TZ34;Q9JII1;F6XC48;F6X9A4	A2AIX0;Q3TZ34;Q9JII1	72 kDa inositol polyphosphate 5-phosphatase	Inpp5e	tr|A2AIX0|A2AIX0_MOUSE 72 kDa inositol polyphosphate 5-phosphatase OS=Mus musculus GN=Inpp5e PE=4 SV=1;tr|Q3TZ34|Q3TZ34_MOUSE Putative uncharacterized protein OS=Mus musculus GN=Inpp5e PE=2 SV=1;sp|Q9JII1|INP5E_MOUSE 72 kDa inositol polyphosphate 5-phospha	13625000	11489000	8965500	14077000	14093000	5848000	28162000	18643000	17789000	3791200	389300	328260	256160	402210	402660	167080	804620	532660	508250	27555000	26719000	33294000	23622000	13869000	29623000	37223000	23544000	50164000	6	6	6	11.9	11.9	11.9	67.268	0	9.0336	132690000	21	3	6	3	4	4
202	E9QAT4;A2AIX1;Q80U43;F7BPW6;Q811L5;Q8K000;Q8R336;Q3TRA8;Q3TZR0	E9QAT4;A2AIX1;Q80U43;F7BPW6;Q811L5;Q8K000		Sec16a	tr|E9QAT4|E9QAT4_MOUSE Protein Sec16a OS=Mus musculus GN=Sec16a PE=1 SV=1;tr|A2AIX1|A2AIX1_MOUSE Protein Sec16a OS=Mus musculus GN=Sec16a PE=1 SV=1;tr|Q80U43|Q80U43_MOUSE MKIAA0310 protein (Fragment) OS=Mus musculus GN=Sec16a PE=2 SV=3;tr|F7BPW6|F7BPW6_MOU	143760000	82692000	47275000	297230000	204640000	92599000	117550000	103710000	37787000	11386000	1452100	835280	477520	3002300	2067000	935350	1187400	1047600	381680	224830000	233030000	437090000	247910000	216670000	202300000	161040000	188190000	135760000	16	16	16	11.5	11.5	11.5	254.2	0	53.373	1127200000	67	12	13	8	12	13
203	A2AJ15;Q8BIL8;Q923C1;A2AJ14;Q8BTW7	A2AJ15;Q8BIL8;Q923C1	Endoplasmic reticulum mannosyl-oligosaccharide 1,2-alpha-mannosidase;alpha-1,2-Mannosidase	Man1b1	sp|A2AJ15|MA1B1_MOUSE Endoplasmic reticulum mannosyl-oligosaccharide 1,2-alpha-mannosidase OS=Mus musculus GN=Man1b1 PE=2 SV=1;tr|Q8BIL8|Q8BIL8_MOUSE Putative uncharacterized protein OS=Mus musculus GN=Man1b1 PE=2 SV=1;tr|Q923C1|Q923C1_MOUSE Man1b1 protein	38216000	18289000	12993000	48769000	23017000	42527000	24826000	6244100	2039900	5708500	1005700	481290	341930	1283400	605710	1119100	653330	164320	53682	38885000	55669000	0	0	0	0	26538000	0	0	3	3	3	6.1	6.1	6.1	75.149	0.00015373	4.9666	216920000	5	2	2	3	2	1
204	A2AJ20;Q8CFL4;A2AJ23;Q925Q2;A2AJ21;Q64322	A2AJ20;Q8CFL4;A2AJ23;Q925Q2;A2AJ21;Q64322	Neural proliferation differentiation and control protein 1	Npdc1	tr|A2AJ20|A2AJ20_MOUSE Neural proliferation differentiation and control protein 1 (Fragment) OS=Mus musculus GN=Npdc1 PE=4 SV=1;tr|Q8CFL4|Q8CFL4_MOUSE Npdc1 protein OS=Mus musculus GN=Npdc1 PE=2 SV=1;tr|A2AJ23|A2AJ23_MOUSE Neural proliferation differentiat	10626000	4267600	0	8174500	13787000	5293900	12694000	14687000	6340700	5419300	758980	304830	0	583890	984750	378130	906730	1049100	452910	0	13878000	0	0	0	0	0	0	0	1	1	1	6.9	6.9	6.9	24.549	0.0025476	2.3158	75870000	8	1	1	0	1	1
205	A2AJ26;P41234;Q6ZPZ4;Q3TZM0;Q3TMR1	A2AJ26;P41234;Q6ZPZ4	ATP-binding cassette sub-family A member 2	Abca2	tr|A2AJ26|A2AJ26_MOUSE ATP-binding cassette sub-family A member 2 OS=Mus musculus GN=Abca2 PE=1 SV=1;sp|P41234|ABCA2_MOUSE ATP-binding cassette sub-family A member 2 OS=Mus musculus GN=Abca2 PE=1 SV=4;tr|Q6ZPZ4|Q6ZPZ4_MOUSE MKIAA1062 protein (Fragment) OS=	241830000	112690000	74366000	978580000	857060000	339540000	108520000	119370000	43679000	26142000	2198500	1024400	676050	8896200	7791400	3086700	986510	1085200	397080	462200000	487540000	489410000	824160000	967610000	774100000	192880000	202040000	162860000	42	42	40	23.3	23.3	22.2	270.52	0	148.8	2875600000	158	29	22	18	38	33
206	A2AJ72;Q3TIX6;Q3ULP9;F7AM43;A2AJ71;F6S444	A2AJ72;Q3TIX6;Q3ULP9		Fubp3	tr|A2AJ72|A2AJ72_MOUSE MCG130458 OS=Mus musculus GN=Fubp3 PE=4 SV=1;tr|Q3TIX6|Q3TIX6_MOUSE Protein Fubp3 OS=Mus musculus GN=Fubp3 PE=2 SV=1;tr|Q3ULP9|Q3ULP9_MOUSE Putative uncharacterized protein OS=Mus musculus GN=Fubp3 PE=2 SV=1	116420000	47408000	40501000	129860000	211980000	30360000	136380000	113280000	45237000	22344000	2985000	1215600	1038500	3329800	5435500	778450	3496900	2904700	1159900	141520000	129040000	149900000	154200000	141340000	153820000	122080000	126570000	133770000	12	11	11	27.6	26.2	26.2	61.447	0	41.635	871430000	52	8	11	6	9	8
207	A2AJ88-2;A2AJ88;B0R010	A2AJ88-2;A2AJ88	Patatin-like phospholipase domain-containing protein 7	Pnpla7	sp|A2AJ88-2|PLPL7_MOUSE Isoform 2 of Patatin-like phospholipase domain-containing protein 7 OS=Mus musculus GN=Pnpla7;sp|A2AJ88|PLPL7_MOUSE Patatin-like phospholipase domain-containing protein 7 OS=Mus musculus GN=Pnpla7 PE=1 SV=1	13878000	9653200	1616100	10324000	3777200	2282800	26882000	30455000	15060000	1460600	177920	123760	20719	132360	48426	29266	344640	390450	193080	35622000	37951000	0	23985000	0	0	26783000	58496000	52941000	6	5	1	5.5	4.9	1	147.56	0.0013926	2.8949	113930000	9	3	4	1	4	2
208	A2AJA9;A2AJA9-2	A2AJA9;A2AJA9-2	Uncharacterized protein C9orf172 homolog	Gm996	sp|A2AJA9|CI172_MOUSE Uncharacterized protein C9orf172 homolog OS=Mus musculus GN=Gm996 PE=1 SV=1;sp|A2AJA9-2|CI172_MOUSE Isoform 2 of Uncharacterized protein C9orf172 homolog OS=Mus musculus GN=Gm996	1219900000	493520000	339630000	1811300000	2279800000	1074200000	1158200000	793880000	379820000	154040000	19676000	7960000	5477900	29214000	36772000	17326000	18681000	12804000	6126200	1744600000	1702600000	1821800000	1952900000	2288800000	2256500000	1235000000	1261500000	1244800000	43	43	43	58.7	58.7	58.7	107.18	0	290.98	9550300000	332	36	35	24	42	40
209	Q8BX36;A2AJG0;Q80UU2	Q8BX36;A2AJG0;Q80UU2	Ribonuclease P protein subunit p38	Rpp38	tr|Q8BX36|Q8BX36_MOUSE Putative uncharacterized protein (Fragment) OS=Mus musculus GN=Rpp38 PE=2 SV=1;tr|A2AJG0|A2AJG0_MOUSE Ribonuclease P protein subunit p38 OS=Mus musculus GN=Rpp38 PE=4 SV=1;sp|Q80UU2|RPP38_MOUSE Ribonuclease P protein subunit p38 OS=M	20076000	9863100	10058000	67444000	54562000	26221000	3669800	10751000	4271100	12172000	1180900	580180	591660	3967300	3209500	1542400	215870	632430	251240	33387000	31807000	46723000	59937000	52159000	53080000	0	26198000	26124000	6	6	6	28.9	28.9	28.9	29.582	0	13.668	206920000	16	3	3	3	5	5
210	A2AJH3;Q3THR4;O70311;Q8CFK1	A2AJH3;Q3THR4;O70311;Q8CFK1	Glycylpeptide N-tetradecanoyltransferase;Glycylpeptide N-tetradecanoyltransferase 2	Nmt2	tr|A2AJH3|A2AJH3_MOUSE Glycylpeptide N-tetradecanoyltransferase OS=Mus musculus GN=Nmt2 PE=3 SV=1;tr|Q3THR4|Q3THR4_MOUSE Glycylpeptide N-tetradecanoyltransferase OS=Mus musculus GN=Nmt2 PE=2 SV=1;sp|O70311|NMT2_MOUSE Glycylpeptide N-tetradecanoyltransferas	111390000	51870000	48590000	83197000	105450000	46958000	196380000	148650000	63343000	26745000	3480900	1620900	1518400	2599900	3295300	1467400	6137000	4645400	1979500	173070000	191310000	246150000	99755000	86280000	70168000	185960000	178340000	192070000	17	12	12	42.8	34.1	34.1	56.984	0	40.34	855830000	38	15	12	9	14	13
211	A2AJI0;A2AJI0-2;F6WF36	A2AJI0;A2AJI0-2;F6WF36	MAP7 domain-containing protein 1	Map7d1	sp|A2AJI0|MA7D1_MOUSE MAP7 domain-containing protein 1 OS=Mus musculus GN=Map7d1 PE=1 SV=1;sp|A2AJI0-2|MA7D1_MOUSE Isoform 2 of MAP7 domain-containing protein 1 OS=Mus musculus GN=Map7d1;tr|F6WF36|F6WF36_MOUSE MAP7 domain-containing protein 1 (Fragment) OS	515840000	185930000	203380000	582610000	995580000	535220000	626210000	484160000	313160000	96567000	11214000	4042000	4421300	12665000	21643000	11635000	13613000	10525000	6807800	684650000	576600000	909610000	700550000	945900000	793900000	577320000	620990000	796940000	32	32	1	38.4	38.4	1.4	93.275	0	120.79	4442100000	176	21	22	19	24	26
212	A2AJK6-3;A2AJK6	A2AJK6-3;A2AJK6	Chromodomain-helicase-DNA-binding protein 7	Chd7	sp|A2AJK6-3|CHD7_MOUSE Isoform 3 of Chromodomain-helicase-DNA-binding protein 7 OS=Mus musculus GN=Chd7;sp|A2AJK6|CHD7_MOUSE Chromodomain-helicase-DNA-binding protein 7 OS=Mus musculus GN=Chd7 PE=1 SV=1	4758800	847350	838450	33306000	18656000	16833000	2211900	0	0	516340	31725	5649	5589.7	222040	124370	112220	14746	0	0	0	0	0	29806000	30638000	28760000	0	0	0	11	7	5	4.2	2.9	2.3	331.19	0	18.439	77452000	8	5	2	2	10	7
213	A2AJK8;Q3TDF3;Q91Z38	A2AJK8;Q3TDF3;Q91Z38	Tetratricopeptide repeat protein 1	Ttc1	tr|A2AJK8|A2AJK8_MOUSE Tetratricopeptide repeat protein 1 OS=Mus musculus GN=Ttc1 PE=4 SV=1;tr|Q3TDF3|Q3TDF3_MOUSE Putative uncharacterized protein OS=Mus musculus GN=Ttc1 PE=2 SV=1;sp|Q91Z38|TTC1_MOUSE Tetratricopeptide repeat protein 1 OS=Mus musculus GN	104770000	42850000	32709000	125320000	106570000	31091000	171920000	88426000	60956000	54616000	7483900	3060700	2336300	8951600	7612200	2220800	12280000	6316200	4354000	169660000	0	150760000	180260000	167770000	135790000	195770000	178450000	156160000	3	3	3	12	12	12	28.553	0	7.8988	764620000	27	3	1	2	3	2
214	Q05BF9;A8Y5Q1;A2AJP9;A8Y5Q0;A2AJQ0;Q3UV70	Q05BF9;A8Y5Q1;A2AJP9;A8Y5Q0;A2AJQ0;Q3UV70	[Pyruvate dehydrogenase [acetyl-transferring]]-phosphatase 1, mitochondrial	Pdp1	tr|Q05BF9|Q05BF9_MOUSE Ppm2c protein OS=Mus musculus GN=Pdp1 PE=2 SV=1;tr|A8Y5Q1|A8Y5Q1_MOUSE MCG54027, isoform CRA_b OS=Mus musculus GN=Pdp1 PE=2 SV=1;tr|A2AJP9|A2AJP9_MOUSE MCG54027, isoform CRA_a OS=Mus musculus GN=Pdp1 PE=3 SV=2;tr|A8Y5Q0|A8Y5Q0_MOUSE	326140000	102960000	88028000	539230000	692610000	268650000	383940000	291240000	151500000	83656000	9592400	3028400	2589100	15860000	20371000	7901400	11292000	8565800	4456000	507790000	439080000	371600000	740450000	759950000	487010000	536390000	528830000	409780000	16	16	16	39	39	39	61.181	0	66.343	2844300000	74	16	11	10	14	16
215	A2AJQ2;A2AJQ3-2;A2AJQ3;D6RI72;A2AJQ1	A2AJQ2;A2AJQ3-2;A2AJQ3	Probable C-mannosyltransferase DPY19L4	Dpy19l4	tr|A2AJQ2|A2AJQ2_MOUSE Probable C-mannosyltransferase DPY19L4 (Fragment) OS=Mus musculus GN=Dpy19l4 PE=4 SV=1;sp|A2AJQ3-2|D19L4_MOUSE Isoform 2 of Probable C-mannosyltransferase DPY19L4 OS=Mus musculus GN=Dpy19l4;sp|A2AJQ3|D19L4_MOUSE Probable C-mannosyltr	12437000	3547600	1059900	9380400	7160300	2442600	14705000	10145000	2662300	2353300	460630	131390	39257	347420	265200	90467	544640	375730	98606	12987000	11716000	0	14993000	10841000	0	14857000	13443000	0	3	3	3	7.9	7.9	7.9	57.754	0.0024269	2.396	63540000	8	3	2	1	2	2
216	B2RUA1;A2AJT5;A2AJT4	B2RUA1;A2AJT5;A2AJT4	Arginine/serine-rich protein PNISR	Pnisr	tr|B2RUA1|B2RUA1_MOUSE Splicing factor, arginine/serine-rich 18 OS=Mus musculus GN=Pnisr PE=2 SV=1;tr|A2AJT5|A2AJT5_MOUSE Arginine/serine-rich protein PNISR OS=Mus musculus GN=Pnisr PE=4 SV=1;sp|A2AJT4|PNISR_MOUSE Arginine/serine-rich protein PNISR OS=Mus	11919000	0	0	0	0	179540	0	0	0	504120	496640	0	0	0	0	7481	0	0	0	0	0	0	0	0	231510	0	0	0	1	1	1	1.4	1.4	1.4	93.077	0.0056403	1.7556	12099000	1	1	0	0	0	0
217	A2AJW4	A2AJW4	Protein phosphatase 1 regulatory subunit	Ppp1r3d	tr|A2AJW4|A2AJW4_MOUSE Protein phosphatase 1 regulatory subunit 3 OS=Mus musculus GN=Ppp1r3d PE=4 SV=1	31909000	13121000	3492500	30856000	9114100	12092000	47009000	54741000	28512000	14428000	1994300	820070	218280	1928500	569630	755740	2938100	3421300	1782000	41961000	33540000	34358000	31034000	0	32380000	50991000	61603000	92337000	6	6	6	29.7	29.7	29.7	30.509	0	7.7704	230850000	18	6	6	2	6	2
218	A2AJY2;O35206;A2AJY7;A2AJY5	A2AJY2;O35206;A2AJY7;A2AJY5	Collagen alpha-1(XV) chain;Restin	Col15a1	tr|A2AJY2|A2AJY2_MOUSE Collagen alpha-1(XV) chain OS=Mus musculus GN=Col15a1 PE=4 SV=1;sp|O35206|COFA1_MOUSE Collagen alpha-1(XV) chain OS=Mus musculus GN=Col15a1 PE=1 SV=2;tr|A2AJY7|A2AJY7_MOUSE Collagen alpha-1(XV) chain OS=Mus musculus GN=Col15a1 PE=4 S	121740000	38810000	25300000	98603000	64829000	35368000	140860000	97097000	37872000	13479000	2484600	792030	516320	2012300	1323000	721800	2874700	1981600	772910	157570000	140010000	161400000	105290000	116420000	86889000	148320000	114380000	125230000	11	11	11	10.4	10.4	10.4	138.29	0	45.321	660480000	51	9	8	7	8	7
219	B2RY18;A2AKB4;A2AKB3	B2RY18;A2AKB4	FERM and PDZ domain-containing protein 1	Frmpd1	tr|B2RY18|B2RY18_MOUSE FERM and PDZ domain containing 1 OS=Mus musculus GN=Frmpd1 PE=2 SV=1;sp|A2AKB4|FRPD1_MOUSE FERM and PDZ domain-containing protein 1 OS=Mus musculus GN=Frmpd1 PE=2 SV=1	5832500	2834600	0	11825000	9481600	1406800	7843500	7778000	1883700	611070	72906	35432	0	147810	118520	17586	98044	97225	23546	6819800	9431600	0	11421000	9649000	0	11595000	14115000	0	3	3	3	3.2	3.2	3.2	169.22	0	7.0846	48886000	11	3	2	0	3	3
220	Q3UVD6;A2AKD7;Q61234	Q3UVD6;A2AKD7;Q61234	Alpha-1-syntrophin	Snta1	tr|Q3UVD6|Q3UVD6_MOUSE Putative uncharacterized protein OS=Mus musculus GN=Snta1 PE=2 SV=1;tr|A2AKD7|A2AKD7_MOUSE Alpha-1-syntrophin OS=Mus musculus GN=Snta1 PE=1 SV=1;sp|Q61234|SNTA1_MOUSE Alpha-1-syntrophin OS=Mus musculus GN=Snta1 PE=1 SV=1	1107800000	489090000	400630000	1278200000	1225300000	821830000	1374900000	1109900000	635120000	324720000	42607000	18811000	15409000	49163000	47127000	31609000	52882000	42689000	24428000	1686700000	1519600000	1735600000	1292900000	1455300000	1716000000	1457700000	1576600000	1361000000	19	19	18	44.3	44.3	42.9	53.312	0	323.31	8442800000	252	18	17	14	18	19
221	E9PYJ6;A2AKG8;Q80T90;A2AKG8-2;REV__Q3UV16;A2AKG8-3	E9PYJ6;A2AKG8	Focadhesin	Focad	tr|E9PYJ6|E9PYJ6_MOUSE Focadhesin OS=Mus musculus GN=Focad PE=4 SV=1;sp|A2AKG8|FOCAD_MOUSE Focadhesin OS=Mus musculus GN=Focad PE=2 SV=1	44010000	41584000	3413300	92354000	73024000	24938000	201210000	53935000	53114000	6832400	511740	483530	39690	1073900	849110	289970	2339700	627150	617600	108080000	143890000	83291000	170430000	119810000	106450000	184220000	163070000	170170000	12	12	12	8.1	8.1	8.1	189.56	0	13.104	587580000	29	8	10	2	9	10
222	E9Q8A1;B0R030;A2AKH4;Q9D3L3;O09044;B0R029	E9Q8A1;B0R030;A2AKH4;Q9D3L3;O09044;B0R029	Synaptosomal-associated protein;Synaptosomal-associated protein 23	Snap23	tr|E9Q8A1|E9Q8A1_MOUSE Synaptosomal-associated protein 23 OS=Mus musculus GN=Snap23 PE=1 SV=1;tr|B0R030|B0R030_MOUSE Synaptosomal-associated protein (Fragment) OS=Mus musculus GN=Snap23 PE=1 SV=2;tr|A2AKH4|A2AKH4_MOUSE Synaptosomal-associated protein OS=Mu	30918000	18711000	6420800	56875000	28827000	20730000	37270000	40635000	24836000	33153000	3864700	2338900	802610	7109400	3603300	2591300	4658800	5079400	3104500	39763000	45260000	44278000	55751000	38876000	36479000	43688000	50993000	50574000	5	4	4	57.1	46.9	46.9	10.923	0	6.487	265220000	11	4	5	3	5	4
223	A2AKH7;Q8JZX5;Q9CSK4;Q9D1G5;Q9CTX7;B0R031	A2AKH7;Q8JZX5;Q9CSK4;Q9D1G5;Q9CTX7	Leucine-rich repeat-containing protein 57	Lrrc57	tr|A2AKH7|A2AKH7_MOUSE Leucine-rich repeat-containing protein 57 (Fragment) OS=Mus musculus GN=Lrrc57 PE=4 SV=2;tr|Q8JZX5|Q8JZX5_MOUSE Leucine rich repeat containing 57 OS=Mus musculus GN=Lrrc57 PE=2 SV=1;tr|Q9CSK4|Q9CSK4_MOUSE Putative uncharacterized pro	449100000	269750000	146840000	685540000	479100000	336590000	902960000	594240000	376980000	282740000	29940000	17983000	9789200	45703000	31940000	22439000	60197000	39616000	25132000	593510000	707180000	735890000	845530000	823070000	1069500000	954250000	917060000	978840000	11	11	10	59.2	59.2	56.4	24.132	0	85.508	4241100000	151	10	10	7	9	9
224	A2AKI5;P43406;Q3U4C8;Q80Y67;F6W6Q6;B7ZCI9;F6RWM8;REV__A2AU83	A2AKI5;P43406;Q3U4C8	Integrin alpha-V;Integrin alpha-V heavy chain;Integrin alpha-V light chain	Itgav	tr|A2AKI5|A2AKI5_MOUSE Integrin alpha-V light chain OS=Mus musculus GN=Itgav PE=3 SV=1;sp|P43406|ITAV_MOUSE Integrin alpha-V OS=Mus musculus GN=Itgav PE=1 SV=2;tr|Q3U4C8|Q3U4C8_MOUSE Putative uncharacterized protein (Fragment) OS=Mus musculus GN=Itgav PE=2	684630000	260560000	196880000	875890000	731890000	542640000	918000000	679660000	351960000	87368000	11411000	4342600	3281300	14598000	12198000	9043900	15300000	11328000	5866100	980530000	915970000	883660000	1113900000	1021600000	1197700000	1099000000	1007000000	1028600000	35	35	35	41.8	41.8	41.8	111.51	0	159.58	5242100000	232	30	25	25	31	30
225	A2AKU9;A2AKV2;A2AKV3;A2AKV1;A2AKV0	A2AKU9;A2AKV2;A2AKV3;A2AKV1	ATP synthase subunit gamma	Atp5c1	tr|A2AKU9|A2AKU9_MOUSE ATP synthase subunit gamma OS=Mus musculus GN=Atp5c1 PE=1 SV=1;tr|A2AKV2|A2AKV2_MOUSE ATP synthase subunit gamma, mitochondrial (Fragment) OS=Mus musculus GN=Atp5c1 PE=1 SV=1;tr|A2AKV3|A2AKV3_MOUSE ATP synthase subunit gamma, mitocho	12486000	9816100	2788600	4945500	26983000	14056000	9869100	7158900	6473800	5911100	780380	613510	174290	309100	1686400	878520	616820	447430	404610	0	33104000	0	0	0	0	0	0	0	16	1	1	51.2	4	4	32.77	0	8.3079	94577000	15	14	14	13	16	15
226	A2AKW0;Q5HZI9;A2AKV9;G3UYJ3;Q3V0T4	A2AKW0;Q5HZI9;A2AKV9;G3UYJ3	Solute carrier family 25 member 51	Slc25a51	tr|A2AKW0|A2AKW0_MOUSE Solute carrier family 25 member 51 OS=Mus musculus GN=Slc25a51 PE=3 SV=1;sp|Q5HZI9|S2551_MOUSE Solute carrier family 25 member 51 OS=Mus musculus GN=Slc25a51 PE=2 SV=1;tr|A2AKV9|A2AKV9_MOUSE Solute carrier family 25 member 51 (Fragme	463790000	155550000	117390000	454490000	804020000	339170000	557690000	512850000	231720000	181830000	23190000	7777600	5869600	22724000	40201000	16959000	27885000	25642000	11586000	696900000	584980000	566200000	528850000	786970000	650360000	579610000	677200000	480950000	16	16	15	60	60	58.1	35.489	0	116.65	3636700000	150	14	12	9	15	15
227	A2AKW8;Q8R4F1-2;J3QNA0;Q8R4F1-3;Q8R4F1;V9GX85;A2AKX2	A2AKW8;Q8R4F1-2;J3QNA0;Q8R4F1-3;Q8R4F1;V9GX85;A2AKX2	Netrin-G2	Ntng2	tr|A2AKW8|A2AKW8_MOUSE Netrin G2 OS=Mus musculus GN=Ntng2 PE=2 SV=1;sp|Q8R4F1-2|NTNG2_MOUSE Isoform 2A of Netrin-G2 OS=Mus musculus GN=Ntng2;tr|J3QNA0|J3QNA0_MOUSE Netrin-G2 OS=Mus musculus GN=Ntng2 PE=4 SV=1;sp|Q8R4F1-3|NTNG2_MOUSE Isoform 2C of Netrin-G2	19042000	5246200	306830	36611000	37422000	5211100	38411000	15348000	1753800	5311700	634730	174870	10228	1220400	1247400	173700	1280400	511610	58461	23640000	26783000	0	56535000	65742000	35923000	51073000	38110000	0	5	5	5	14.7	14.7	14.7	59.868	0	7.0769	159350000	17	3	3	1	4	4
228	Q6P6I7;A2AL12;Q5FB19;Q3UZG3;Q8BG05;Q5U3M2;Q58E39;A2AL13;V9GX38	Q6P6I7;A2AL12;Q5FB19;Q3UZG3;Q8BG05;Q5U3M2	Heterogeneous nuclear ribonucleoprotein A3	Hnrnpa3	tr|Q6P6I7|Q6P6I7_MOUSE Hnrpa3 protein OS=Mus musculus GN=Hnrnpa3 PE=2 SV=1;tr|A2AL12|A2AL12_MOUSE Heterogeneous nuclear ribonucleoprotein A3 OS=Mus musculus GN=Hnrnpa3 PE=4 SV=1;tr|Q5FB19|Q5FB19_MOUSE Heterogeneous nuclear ribonucleoprotein A3 OS=Mus muscu	14972000000	6618700000	5109700000	28143000000	29703000000	18210000000	7976000000	4373400000	2968300000	6945600000	880720000	389340000	300570000	1655500000	1747300000	1071200000	469180000	257260000	174610000	18335000000	13897000000	18193000000	23286000000	27975000000	25448000000	5983800000	6276100000	5776900000	30	30	5	64.8	64.8	10.1	34.376	0	323.31	118070000000	1303	28	26	24	30	27
229	A2AL50;Q8C0I1;H3BKN2;A2AL49;Q8BKC4;Q3TNW8;H3BIY5	A2AL50;Q8C0I1;H3BKN2;A2AL49;Q8BKC4	Alkyldihydroxyacetonephosphate synthase, peroxisomal	Agps	tr|A2AL50|A2AL50_MOUSE Alkyldihydroxyacetonephosphate synthase, peroxisomal OS=Mus musculus GN=Agps PE=1 SV=1;sp|Q8C0I1|ADAS_MOUSE Alkyldihydroxyacetonephosphate synthase, peroxisomal OS=Mus musculus GN=Agps PE=1 SV=1;tr|H3BKN2|H3BKN2_MOUSE Alkyldihydroxya	313270000	54021000	12146000	275410000	229940000	93303000	241200000	121210000	107520000	35318000	7640800	1317600	296250	6717400	5608300	2275700	5882900	2956300	2622500	185340000	230930000	102040000	335850000	258090000	258540000	293170000	293760000	381900000	18	18	17	38	38	37.1	74.342	0	60.65	1448000000	76	14	11	2	16	14
230	Q8BQK0;A2AL85;Q8BSY0;Q8CBM2;Q9EQ66;Q3TU40;A2AL81;A2AL77;A2AL75;Q9EQ63;Q9EQ62;Q9CR06;Q9D7J8;Q920F7;A2AL74;Q920F8;A2AL76;Q920F9;Q9EQ64	Q8BQK0;A2AL85;Q8BSY0;Q8CBM2;Q9EQ66	Aspartyl/asparaginyl beta-hydroxylase	Asph;ASPH	tr|Q8BQK0|Q8BQK0_MOUSE Putative uncharacterized protein OS=Mus musculus GN=Asph PE=2 SV=1;tr|A2AL85|A2AL85_MOUSE Aspartyl/asparaginyl beta-hydroxylase OS=Mus musculus GN=Asph PE=4 SV=1;sp|Q8BSY0|ASPH_MOUSE Aspartyl/asparaginyl beta-hydroxylase OS=Mus muscu	844430000	358010000	465880000	804030000	568270000	718360000	1198900000	901160000	833820000	196850000	24836000	10530000	13702000	23648000	16714000	21128000	35261000	26505000	24524000	970420000	1031200000	1707200000	868990000	992800000	1006000000	1361900000	1391200000	1461800000	21	21	19	37.8	37.8	30.6	81.491	0	141.9	6692800000	113	16	15	14	19	13
231	I6L9E0;Q3U3J6;A2ALA6;P09925;V9GXE6	I6L9E0;Q3U3J6;A2ALA6;P09925;V9GXE6	Surfeit locus protein 1	Surf1	tr|I6L9E0|I6L9E0_MOUSE Surf1 protein OS=Mus musculus GN=Surf1 PE=2 SV=1;tr|Q3U3J6|Q3U3J6_MOUSE Putative uncharacterized protein OS=Mus musculus GN=Surf1 PE=2 SV=1;tr|A2ALA6|A2ALA6_MOUSE Surfeit gene 1, isoform CRA_a OS=Mus musculus GN=Surf1 PE=4 SV=1;sp|P0	62671000	46044000	20814000	205400000	154220000	116630000	136270000	98911000	52001000	59531000	4178100	3069600	1387600	13693000	10282000	7775600	9084800	6594100	3466700	117300000	159130000	161110000	181500000	170150000	241670000	138520000	136240000	163970000	8	8	8	41.4	41.4	41.4	29.966	0	16.252	892970000	43	6	7	4	6	6
232	A2ALB2;Q6PAQ4;A2ALB1	A2ALB2;Q6PAQ4;A2ALB1	RNA exonuclease 4	Rexo4	tr|A2ALB2|A2ALB2_MOUSE RNA exonuclease 4 OS=Mus musculus GN=Rexo4 PE=4 SV=1;sp|Q6PAQ4|REXO4_MOUSE RNA exonuclease 4 OS=Mus musculus GN=Rexo4 PE=2 SV=2;tr|A2ALB1|A2ALB1_MOUSE RNA exonuclease 4 (Fragment) OS=Mus musculus GN=Rexo4 PE=4 SV=1	18977000	9553600	8062000	51479000	68106000	21220000	20985000	13126000	3938700	8617900	759060	382140	322480	2059200	2724200	848810	839410	525030	157550	24726000	32199000	57663000	46968000	105730000	35697000	20043000	17500000	12948000	7	7	7	22	22	22	45.465	0	7.9755	215450000	13	5	3	3	5	5
233	A2ALF0;A2ALF2;Q6NZB0;A2ALF3;F6TQL3;F7CXJ2;F6QIL6	A2ALF0;A2ALF2;Q6NZB0;A2ALF3;F6TQL3	DnaJ homolog subfamily C member 8	Dnajc8	tr|A2ALF0|A2ALF0_MOUSE DnaJ homolog subfamily C member 8 OS=Mus musculus GN=Dnajc8 PE=4 SV=1;tr|A2ALF2|A2ALF2_MOUSE DnaJ (Hsp40) homolog, subfamily C, member 8 OS=Mus musculus GN=Dnajc8 PE=2 SV=1;sp|Q6NZB0|DNJC8_MOUSE DnaJ homolog subfamily C member 8 OS=M	297700000	135450000	65160000	340370000	343150000	243020000	63930000	39165000	818010	138980000	27063000	12313000	5923700	30943000	31196000	22092000	5811800	3560500	74365	195970000	210930000	297180000	317080000	382250000	360710000	66738000	54134000	0	7	7	7	34.7	34.7	34.7	25.835	0	196.7	1528800000	30	7	6	3	7	6
234	A2ALI5	A2ALI5	Adherens junction-associated protein 1	Ajap1	sp|A2ALI5|AJAP1_MOUSE Adherens junction-associated protein 1 OS=Mus musculus GN=Ajap1 PE=2 SV=1	7337500	0	0	3664000	0	2551200	93409000	41694000	0	7432700	366870	0	0	183200	0	127560	4670400	2084700	0	23810000	0	0	0	0	16252000	88636000	69753000	0	3	3	3	12.9	12.9	12.9	44.771	0.00030057	4.4429	148650000	5	2	0	0	1	0
235	A2ALK6;Q3TMR3;Q9JMC8;B1AXV1	A2ALK6;Q3TMR3;Q9JMC8	Band 4.1-like protein 4B	Epb4.1l4b;Epb41l4b	tr|A2ALK6|A2ALK6_MOUSE Band 4.1-like protein 4B OS=Mus musculus GN=Epb4.1l4b PE=4 SV=1;tr|Q3TMR3|Q3TMR3_MOUSE Putative uncharacterized protein (Fragment) OS=Mus musculus GN=Epb4.1l4b PE=2 SV=1;sp|Q9JMC8|E41LB_MOUSE Band 4.1-like protein 4B OS=Mus musculus	58729000	38488000	22449000	142600000	160550000	56300000	65556000	59508000	24264000	14615000	1365800	895070	522060	3316200	3733800	1309300	1524600	1383900	564290	107740000	105960000	101600000	163660000	176450000	204040000	75973000	88401000	79178000	12	12	11	20.1	20.1	19.2	99.782	0	25.389	628450000	45	9	8	5	10	10
236	A2ALK8;A2ALK9;Q8BWC1;Q14BS5	A2ALK8	Tyrosine-protein phosphatase non-receptor type 3	Ptpn3	sp|A2ALK8|PTN3_MOUSE Tyrosine-protein phosphatase non-receptor type 3 OS=Mus musculus GN=Ptpn3 PE=2 SV=1	9326100	4248000	3616100	18145000	19880000	8224100	0	9585300	3538400	1417800	172710	78666	66964	336030	368160	152300	0	177510	65525	0	0	0	23930000	17380000	20942000	0	16446000	0	3	3	3	3.7	3.7	3.7	103.89	0.0038895	1.9107	76564000	5	1	1	1	3	3
237	A2ALL9;Q8C048;Q0VF54;REV__Q91YR5-2;REV__Q91YR5-1;REV__Q3TRF3;REV__Q91YR5	A2ALL9;Q8C048;Q0VF54	Calcium-transporting ATPase	Atp2b3	tr|A2ALL9|A2ALL9_MOUSE Calcium-transporting ATPase OS=Mus musculus GN=Atp2b3 PE=1 SV=1;tr|Q8C048|Q8C048_MOUSE Calcium-transporting ATPase OS=Mus musculus GN=Atp2b3 PE=2 SV=1;tr|Q0VF54|Q0VF54_MOUSE Calcium-transporting ATPase OS=Mus musculus GN=Atp2b3 PE=2	28010000000	11152000000	7389000000	22534000000	23493000000	14522000000	38975000000	28076000000	16857000000	3183400000	466830000	185870000	123150000	375560000	391550000	242030000	649580000	467930000	280950000	27404000000	22799000000	21428000000	21927000000	23142000000	23697000000	35248000000	34774000000	33802000000	69	69	2	54.6	54.6	1.8	128.74	0	323.31	191010000000	2934	67	66	60	67	64
238	F6UKB4;E9Q151;A2ALM6;Q8VBW1-3;Q8VBW1-2;Q8VBW1;E9Q6T2;A0A023JDV8;B2LHN0	F6UKB4;E9Q151;A2ALM6;Q8VBW1-3;Q8VBW1-2;Q8VBW1	Transporter;Sodium- and chloride-dependent creatine transporter 1	Slc6a8	tr|F6UKB4|F6UKB4_MOUSE Transporter (Fragment) OS=Mus musculus GN=Slc6a8 PE=3 SV=1;tr|E9Q151|E9Q151_MOUSE Transporter OS=Mus musculus GN=Slc6a8 PE=3 SV=1;tr|A2ALM6|A2ALM6_MOUSE Transporter OS=Mus musculus GN=Slc6a8 PE=2 SV=1;sp|Q8VBW1-3|SC6A8_MOUSE Isoform	10956000	2223500	7124900	4688300	36508000	12814000	45409000	33059000	5330200	9300800	644440	130790	419110	275780	2147600	753780	2671100	1944700	313540	28476000	0	32847000	0	38901000	29940000	50157000	49025000	0	3	2	2	5.6	4.3	4.3	64.599	0	22.167	158110000	8	3	2	3	2	3
239	A2ALP5;Q3UG32;P52734;Q99K79;B2XXT9;B2XXT3;E9PVB8;Q8BY35-2;Q8BY35	A2ALP5;Q3UG32;P52734;Q99K79	FYVE, RhoGEF and PH domain-containing protein 1	Fgd1	tr|A2ALP5|A2ALP5_MOUSE FYVE, RhoGEF and PH domain-containing protein 1 OS=Mus musculus GN=Fgd1 PE=4 SV=1;tr|Q3UG32|Q3UG32_MOUSE Putative uncharacterized protein OS=Mus musculus GN=Fgd1 PE=2 SV=1;sp|P52734|FGD1_MOUSE FYVE, RhoGEF and PH domain-containing pr	6161700	3152000	3272700	8799200	7930300	5418500	16083000	7137500	7276100	1387900	131100	67063	69633	187220	168730	115290	342200	151860	154810	0	0	0	8106600	11680000	0	0	0	0	4	4	3	7.7	7.7	7	89.005	0.001133	3.2029	65232000	4	2	2	1	3	2
240	A2ALR9;Q3V0C5;Q3V0C5-5;Q3V0C5-2;A2ALR8;Q3V0C5-4;Q3V0C5-3;B7ZNK5;A2ALS8;A2ALS9;F7ALR2;F6TH61;F6VSP0;A2BDP2;A2ALR5	A2ALR9;Q3V0C5;Q3V0C5-5;Q3V0C5-2;A2ALR8;Q3V0C5-4;Q3V0C5-3	Ubiquitin carboxyl-terminal hydrolase 48	Usp48	tr|A2ALR9|A2ALR9_MOUSE Ubiquitin carboxyl-terminal hydrolase 48 OS=Mus musculus GN=Usp48 PE=4 SV=1;sp|Q3V0C5|UBP48_MOUSE Ubiquitin carboxyl-terminal hydrolase 48 OS=Mus musculus GN=Usp48 PE=2 SV=2;sp|Q3V0C5-5|UBP48_MOUSE Isoform 5 of Ubiquitin carboxyl-ter	188060000	789440000	570350000	5018700000	2370900000	4413700000	2391000000	1707200000	1333400000	307920000	3083000	12942000	9350100	82274000	38867000	72356000	39197000	27987000	21858000	1572300000	1610000000	1356300000	3754600000	3654000000	3800900000	1794900000	1697100000	1913300000	7	7	7	9.8	9.8	9.8	118.77	0	12.282	18783000000	34	7	5	4	7	6
241	A2ALS4;A2ALS5;A2ALS5-4;A2ALS5-3;A2ALS5-2;A2ALS3;A2ALS2	A2ALS4;A2ALS5;A2ALS5-4;A2ALS5-3;A2ALS5-2	Rap1 GTPase-activating protein 1	Rap1gap	tr|A2ALS4|A2ALS4_MOUSE Rap1 GTPase-activating protein 1 OS=Mus musculus GN=Rap1gap PE=4 SV=1;sp|A2ALS5|RPGP1_MOUSE Rap1 GTPase-activating protein 1 OS=Mus musculus GN=Rap1gap PE=1 SV=2;sp|A2ALS5-4|RPGP1_MOUSE Isoform 4 of Rap1 GTPase-activating protein 1 O	1042300000	853570000	226520000	755360000	661370000	351380000	986710000	756600000	302540000	160440000	28171000	23069000	6122200	20415000	17875000	9496800	26668000	20449000	8176600	1223400000	1420600000	1178500000	1105700000	896900000	830190000	1125500000	1155000000	1255100000	22	22	11	35.3	35.3	18.8	81.251	0	138.74	5936400000	149	18	18	14	16	16
242	A2ALU3	A2ALU3		Dennd1a	tr|A2ALU3|A2ALU3_MOUSE DENN domain-containing protein 1A (Fragment) OS=Mus musculus GN=Dennd1a PE=1 SV=2	0	2021500	0	0	4074600	0	10329000	6841800	0	1368600	0	118910	0	0	239680	0	607570	402460	0	0	0	0	0	0	0	0	10747000	0	2	1	1	9.4	5.1	5.1	30.819	0.0021792	2.5236	23267000	1	1	1	1	0	1
243	A7TU71;A2ALU4-2;A2ALU4	A7TU71;A2ALU4-2;A2ALU4	Protein Shroom2	Shroom2	tr|A7TU71|A7TU71_MOUSE Protein Shroom2 OS=Mus musculus GN=Shroom2 PE=1 SV=1;sp|A2ALU4-2|SHRM2_MOUSE Isoform 2 of Protein Shroom2 OS=Mus musculus GN=Shroom2;sp|A2ALU4|SHRM2_MOUSE Protein Shroom2 OS=Mus musculus GN=Shroom2 PE=1 SV=1	5768100	1003600	0	27158000	14496000	9010200	1207800	1717200	1575000	619370	57681	10036	0	271580	144960	90102	12078	17172	15750	0	0	0	19616000	15752000	0	0	0	0	4	4	4	3	3	3	165.26	0.00058301	3.7718	61937000	4	1	1	0	3	2
244	A2ALV3;Q62420;Q8BXU5;F6ZL13;A2ALV1	A2ALV3;Q62420;Q8BXU5;F6ZL13;A2ALV1	Endophilin-A1	Sh3gl2	tr|A2ALV3|A2ALV3_MOUSE Endophilin-A1 OS=Mus musculus GN=Sh3gl2 PE=4 SV=1;sp|Q62420|SH3G2_MOUSE Endophilin-A1 OS=Mus musculus GN=Sh3gl2 PE=1 SV=2;tr|Q8BXU5|Q8BXU5_MOUSE Endophilin-A1 OS=Mus musculus GN=Sh3gl2 PE=2 SV=1;tr|F6ZL13|F6ZL13_MOUSE Endophilin-A1 (	7301800000	3527600000	2701800000	7742900000	5136800000	3679000000	11609000000	9704900000	5534900000	2033500000	260780000	125990000	96494000	276530000	183460000	131390000	414620000	346600000	197670000	9470100000	8671800000	7878800000	7398000000	6479000000	7108900000	8907400000	11646000000	10551000000	21	14	14	47.1	38.5	38.5	48.295	0	323.31	56939000000	930	21	19	18	20	19
245	A2AM56;Q8K440-2;Q8K440	A2AM56;Q8K440-2;Q8K440	ATP-binding cassette sub-family A member 8-B	Abca8b	tr|A2AM56|A2AM56_MOUSE ATP-binding cassette, sub-family A (ABC1), member 8b OS=Mus musculus GN=Abca8b PE=2 SV=1;sp|Q8K440-2|ABC8B_MOUSE Isoform 2 of ATP-binding cassette sub-family A member 8-B OS=Mus musculus GN=Abca8b;sp|Q8K440|ABC8B_MOUSE ATP-binding ca	26568000	12615000	12831000	28317000	21576000	26375000	62704000	35845000	22052000	3456700	368990	175210	178210	393290	299670	366330	870890	497850	306280	31810000	44499000	65105000	37456000	38955000	50326000	68004000	50589000	51195000	6	6	6	5.1	5.1	5.1	183.04	0	11.568	248880000	21	5	4	3	4	3
246	A2AM67;Q8JZW5	A2AM67;Q8JZW5	SH2 domain-containing protein 5	Sh2d5	tr|A2AM67|A2AM67_MOUSE SH2 domain-containing protein 5 OS=Mus musculus GN=Sh2d5 PE=2 SV=1;sp|Q8JZW5|SH2D5_MOUSE SH2 domain-containing protein 5 OS=Mus musculus GN=Sh2d5 PE=2 SV=2	12888000	5528600	818990	1868300	0	2967700	9388300	10356000	11630000	2310200	537020	230360	34125	77847	0	123650	391180	431480	484580	16427000	16770000	0	0	0	10549000	0	17079000	30106000	4	4	4	10.5	10.5	10.5	47.38	0.0086542	1.5323	55446000	5	3	2	1	1	0
247	A2AMG5;Q9R207	A2AMG5;Q9R207	Nibrin	Nbn	tr|A2AMG5|A2AMG5_MOUSE Nibrin (Fragment) OS=Mus musculus GN=Nbn PE=1 SV=1;sp|Q9R207|NBN_MOUSE Nibrin OS=Mus musculus GN=Nbn PE=1 SV=1	5232800	0	2489000	3938800	6756800	2566100	0	0	0	723570	180440	0	85826	135820	232990	88487	0	0	0	0	0	0	0	0	5244500	0	0	0	1	1	1	2.6	2.6	2.6	60.553	0.0043945	1.8588	20983000	3	1	0	1	1	1
248	A2AMH5;A2AMH4;Q6X893;Q6X893-2;A2AMH3;A2AMH8	A2AMH5;A2AMH4;Q6X893;Q6X893-2;A2AMH3	Choline transporter-like protein 1	Slc44a1	tr|A2AMH5|A2AMH5_MOUSE Choline transporter-like protein 1 OS=Mus musculus GN=Slc44a1 PE=4 SV=1;tr|A2AMH4|A2AMH4_MOUSE Choline transporter-like protein 1 OS=Mus musculus GN=Slc44a1 PE=4 SV=1;sp|Q6X893|CTL1_MOUSE Choline transporter-like protein 1 OS=Mus mus	829720000	348640000	333890000	3241500000	2176100000	1183700000	848840000	629690000	327350000	309980000	25929000	10895000	10434000	101300000	68002000	36990000	26526000	19678000	10230000	1367100000	1274600000	1472400000	2829200000	2925700000	2543500000	1128500000	1051800000	979280000	18	18	18	25.8	25.8	25.8	73.044	0	274.38	9919400000	286	17	15	13	18	16
249	Z4YKC4;A2AMI2;Q80XI3-2;Q80XI3-4;Q80XI3;Q80XI3-3;Q6DI78;A2AMI7;Q3V075;A2AMI6;A2AMI4;Q8BQR8	Z4YKC4;A2AMI2;Q80XI3-2;Q80XI3-4;Q80XI3;Q80XI3-3;Q6DI78;A2AMI7	Eukaryotic translation initiation factor 4 gamma 3	Eif4g3	tr|Z4YKC4|Z4YKC4_MOUSE Eukaryotic translation initiation factor 4 gamma 3 OS=Mus musculus GN=Eif4g3 PE=1 SV=1;tr|A2AMI2|A2AMI2_MOUSE Eukaryotic translation initiation factor 4 gamma 3 OS=Mus musculus GN=Eif4g3 PE=1 SV=1;sp|Q80XI3-2|IF4G3_MOUSE Isoform 2 of	621900000	271640000	110070000	693060000	614580000	247180000	622390000	313670000	134610000	35579000	6097100	2663100	1079100	6794700	6025300	2423400	6101800	3075200	1319700	765930000	691110000	879800000	709250000	660190000	508320000	396930000	453730000	392710000	34	29	29	26.4	23.3	23.3	173.55	0	76.163	3629100000	131	25	26	16	27	28
250	A2AMV1;A2AMU9;Q9D0I8;Q9QYY3	A2AMV1;A2AMU9;Q9D0I8;Q9QYY3	mRNA turnover protein 4 homolog	Mrto4;mg684	tr|A2AMV1|A2AMV1_MOUSE RIKEN cDNA 2610012O22, isoform CRA_a OS=Mus musculus GN=Mrto4 PE=3 SV=1;tr|A2AMU9|A2AMU9_MOUSE Mrto4 protein OS=Mus musculus GN=Mrto4 PE=2 SV=1;sp|Q9D0I8|MRT4_MOUSE mRNA turnover protein 4 homolog OS=Mus musculus GN=Mrto4 PE=2 SV=1;t	18984000	8568600	0	41609000	23455000	4256100	4504400	2658500	0	6119800	1116700	504030	0	2447600	1379700	250360	264970	156380	0	49600000	22505000	0	33529000	20108000	14068000	10678000	0	0	4	4	4	14.7	14.7	14.7	27.417	0.0017791	2.6078	104040000	5	3	3	0	3	3
251	A2AMZ4	A2AMZ4	Uncharacterized protein C17orf89 homolog		sp|A2AMZ4|CQ089_MOUSE Uncharacterized protein C17orf89 homolog OS=Mus musculus PE=4 SV=1	34378000	9046600	7669600	4880600	76547000	52916000	46945000	60705000	17938000	51837000	5729600	1507800	1278300	813440	12758000	8819300	7824100	10118000	2989700	58684000	42011000	0	0	47185000	79006000	31398000	70264000	43797000	2	2	2	39.2	39.2	39.2	7.7849	0	8.6949	311020000	19	2	2	1	1	2
252	A2AN08-3;A2AN08;A2AN08-5;A2AN08-2;F6SSP6;Z4YMA7;A2VCS3;A2AN08-4;Z4YLP1	A2AN08-3;A2AN08;A2AN08-5	E3 ubiquitin-protein ligase UBR4	Ubr4	sp|A2AN08-3|UBR4_MOUSE Isoform 3 of E3 ubiquitin-protein ligase UBR4 OS=Mus musculus GN=Ubr4;sp|A2AN08|UBR4_MOUSE E3 ubiquitin-protein ligase UBR4 OS=Mus musculus GN=Ubr4 PE=1 SV=1;sp|A2AN08-5|UBR4_MOUSE Isoform 5 of E3 ubiquitin-protein ligase UBR4 OS=Mus	2060700000	915880000	589570000	2359100000	2164300000	1273600000	3031200000	1902700000	1166300000	58574000	7805600	3469200	2233200	8935900	8198200	4824300	11482000	7207300	4418000	2780900000	2798200000	3046500000	2584600000	2591000000	2578600000	3356000000	3173800000	3178600000	140	140	140	37.2	37.2	37.2	570.29	0	323.31	15463000000	735	112	102	71	116	117
253	A2AN37;P52623;F7CBX2;Q3V218;Q8C476;Q543C2;Q99PM9	A2AN37;P52623	Uridine-cytidine kinase;Uridine-cytidine kinase 1	Uck1	tr|A2AN37|A2AN37_MOUSE Uridine-cytidine kinase OS=Mus musculus GN=Uck1 PE=3 SV=1;sp|P52623|UCK1_MOUSE Uridine-cytidine kinase 1 OS=Mus musculus GN=Uck1 PE=2 SV=2	92555000	50678000	21897000	101970000	108730000	94378000	94631000	77099000	23515000	35024000	4871300	2667300	1152500	5366600	5722800	4967300	4980600	4057900	1237600	124470000	171300000	141340000	167650000	118390000	119680000	106780000	103590000	79037000	7	7	7	30.7	30.7	30.7	31.669	0	25.511	665450000	36	5	6	4	5	5
254	Q6GQU3;Q70KX6;Q8BIT2;Q3UUV0;Q3TMV1;Q3TXU6;A2AN61;Q8VEH2;F7D5G9;F6S5B6;F6XWQ4	Q6GQU3;Q70KX6;Q8BIT2;Q3UUV0;Q3TMV1;Q3TXU6;A2AN61;Q8VEH2;F7D5G9;F6S5B6;F6XWQ4		Ciz1	tr|Q6GQU3|Q6GQU3_MOUSE Ciz1 protein OS=Mus musculus GN=Ciz1 PE=2 SV=1;tr|Q70KX6|Q70KX6_MOUSE Cip1-interacting zinc-finger protein OS=Mus musculus GN=Ciz1 PE=2 SV=1;tr|Q8BIT2|Q8BIT2_MOUSE Putative uncharacterized protein OS=Mus musculus GN=Ciz1 PE=2 SV=1;tr	10368000	6596500	2838500	21133000	27776000	17033000	11527000	4765700	2769700	5516100	545670	347190	149390	1112300	1461900	896460	606660	250820	145770	20183000	14499000	0	33905000	38042000	22867000	13404000	13109000	0	3	3	3	7.3	7.3	7.3	59.618	0	6.0785	104810000	7	2	3	1	2	3
255	Q80YU9;A2AN96;O88851	Q80YU9;A2AN96;O88851	Putative hydrolase RBBP9	Rbbp9	tr|Q80YU9|Q80YU9_MOUSE Retinoblastoma binding protein 9 OS=Mus musculus GN=Rbbp9 PE=2 SV=1;tr|A2AN96|A2AN96_MOUSE Retinoblastoma binding protein 9 OS=Mus musculus GN=Rbbp9 PE=2 SV=1;sp|O88851|RBBP9_MOUSE Putative hydrolase RBBP9 OS=Mus musculus GN=Rbbp9 PE	671170000	225120000	127910000	942030000	445390000	266930000	977050000	538470000	299860000	374490000	55931000	18760000	10659000	78502000	37116000	22244000	81421000	44872000	24988000	992330000	834110000	800320000	850730000	769240000	881810000	1427200000	1421900000	1286300000	10	10	10	67.7	67.7	67.7	20.912	0	76.742	4493900000	113	10	9	7	10	9
256	A2ANM0;Q9WTS4;A2ANL9;Q9WTS4-2	A2ANM0;Q9WTS4;A2ANL9	Teneurin-1;Ten-1 intracellular domain;Teneurin C-terminal-associated peptide	Tenm1	tr|A2ANM0|A2ANM0_MOUSE Odd Oz/ten-m homolog 1 (Drosophila) OS=Mus musculus GN=Tenm1 PE=2 SV=1;sp|Q9WTS4|TEN1_MOUSE Teneurin-1 OS=Mus musculus GN=Tenm1 PE=1 SV=1;tr|A2ANL9|A2ANL9_MOUSE Teneurin-1 OS=Mus musculus GN=Tenm1 PE=4 SV=1	150680000	84142000	50917000	131500000	146210000	86414000	332690000	292550000	203370000	11116000	1132900	632650	382840	988700	1099300	649730	2501400	2199600	1529100	184360000	238010000	305930000	156500000	197080000	202390000	396770000	464950000	495060000	24	24	22	11.6	11.6	10.7	305.79	0	82.734	1478500000	73	21	15	13	17	14
257	A2ANU3;B1AYD6;B1AYD3;B1AYD4;B1AYD5	A2ANU3;B1AYD6	Synapse differentiation-inducing gene protein 1	Syndig1	sp|A2ANU3|SYNG1_MOUSE Synapse differentiation-inducing gene protein 1 OS=Mus musculus GN=Syndig1 PE=1 SV=1;tr|B1AYD6|B1AYD6_MOUSE Synapse differentiation-inducing gene protein 1 (Fragment) OS=Mus musculus GN=Syndig1 PE=4 SV=2	24378000	31441000	16394000	7664600	9580500	5304700	47259000	48219000	37573000	15188000	1625200	2096100	1092900	510970	638700	353650	3150600	3214600	2504900	59738000	79866000	65162000	0	0	36979000	45944000	60823000	83349000	5	5	5	32.9	32.9	32.9	28.456	0.00015152	4.6696	227810000	13	2	4	3	1	1
258	J3QMC5;A2ANY6;Q3TPE2;Q6R5G2;Q497I1;Q8CAR9;Q5U481	J3QMC5;A2ANY6		Mdn1	tr|J3QMC5|J3QMC5_MOUSE Midasin OS=Mus musculus GN=Mdn1 PE=1 SV=1;tr|A2ANY6|A2ANY6_MOUSE Midasin OS=Mus musculus GN=Mdn1 PE=1 SV=1	39887000	13796000	5211300	198480000	108440000	36884000	19919000	13107000	10532000	1412200	126220	43659	16491	628100	343160	116720	63034	41478	33329	37004000	49859000	31541000	236920000	170070000	137270000	19174000	14245000	43403000	24	24	24	6	6	6	629.58	0	35.713	446250000	35	14	7	3	23	18
259	H3BIW6;F7C3A0;A2AP18-3;A2AP18-2;A2AP18-4;A2AP18;H3BK11;A2AP18-5;Q6PAS6;Q6ZQB0;F6UKG4;F7C512;A6PWW4;Q4KWH5-5	H3BIW6;F7C3A0;A2AP18-3;A2AP18-2;A2AP18-4;A2AP18;H3BK11;A2AP18-5	Phosphoinositide phospholipase C;1-phosphatidylinositol 4,5-bisphosphate phosphodiesterase eta-2	Plch2	tr|H3BIW6|H3BIW6_MOUSE Phosphoinositide phospholipase C OS=Mus musculus GN=Plch2 PE=1 SV=1;tr|F7C3A0|F7C3A0_MOUSE Phosphoinositide phospholipase C OS=Mus musculus GN=Plch2 PE=1 SV=2;sp|A2AP18-3|PLCH2_MOUSE Isoform 3 of 1-phosphatidylinositol 4,5-bisphospha	172190000	58898000	94692000	65000000	41470000	26518000	631190000	405060000	179390000	25370000	2609000	892390	1434700	984850	628330	401790	9563400	6137300	2718000	287630000	231580000	257130000	95460000	66507000	72162000	560370000	450930000	382200000	28	28	26	32.2	32.2	30.6	125.78	0	96.099	1674400000	96	18	17	8	13	8
260	A2AP31;Q3UIU2;A2AP32	A2AP31;Q3UIU2;A2AP32	NADH dehydrogenase [ubiquinone] 1 beta subcomplex subunit 6	Ndufb6	tr|A2AP31|A2AP31_MOUSE MCG9810 OS=Mus musculus GN=Ndufb6 PE=2 SV=1;sp|Q3UIU2|NDUB6_MOUSE NADH dehydrogenase [ubiquinone] 1 beta subcomplex subunit 6 OS=Mus musculus GN=Ndufb6 PE=1 SV=3;tr|A2AP32|A2AP32_MOUSE NADH dehydrogenase [ubiquinone] 1 beta subcomple	2053200000	698400000	541850000	3222400000	1987300000	1203500000	1754700000	1573100000	753380000	1253400000	186660000	63491000	49259000	292940000	180660000	109410000	159520000	143010000	68489000	2537000000	2000900000	1999300000	2330900000	2450500000	2453200000	2071400000	1971700000	1837200000	13	13	13	64.1	64.1	64.1	15.515	0	112.73	13788000000	460	12	12	12	12	12
261	I7HJQ8;A2AP74;Q8BIF0-2;Q8BIF0	I7HJQ8;A2AP74;Q8BIF0-2;Q8BIF0	CD99 antigen-like protein 2	Cd99l2	tr|I7HJQ8|I7HJQ8_MOUSE CD99 antigen-like protein 2 OS=Mus musculus GN=Cd99l2 PE=4 SV=1;tr|A2AP74|A2AP74_MOUSE CD99 antigen-like protein 2 OS=Mus musculus GN=Cd99l2 PE=4 SV=1;sp|Q8BIF0-2|C99L2_MOUSE Isoform 2 of CD99 antigen-like protein 2 OS=Mus musculus G	31671000	17842000	8592800	5731800	6519800	23395000	59410000	15591000	43883000	21264000	3167100	1784200	859280	573180	651980	2339500	5941000	1559100	4388300	43723000	61032000	0	0	28496000	35781000	67720000	47152000	82831000	3	3	3	25.8	25.8	25.8	20.092	0	10.936	212640000	12	2	3	2	1	2
262	A2AP82;Q6NZA9;A2AP81	A2AP82;Q6NZA9	Transcription initiation factor TFIID subunit 9B	Taf9b	tr|A2AP82|A2AP82_MOUSE Transcription initiation factor TFIID subunit 9B OS=Mus musculus GN=Taf9b PE=1 SV=1;sp|Q6NZA9|TAF9B_MOUSE Transcription initiation factor TFIID subunit 9B OS=Mus musculus GN=Taf9b PE=1 SV=2	17012000	12735000	2837800	25680000	18403000	24339000	11204000	8064300	2547700	6141200	850610	636760	141890	1284000	920150	1217000	560220	403210	127390	24349000	22136000	0	32315000	32936000	37995000	8793100	12639000	0	4	4	1	13	13	3.8	32.051	0.00044676	4.242	122820000	14	3	3	1	3	2
263	A2AP88;Q8BYK8;Q571G5	A2AP88;Q8BYK8	Zinc finger CCCH domain-containing protein 6	Zc3h6	tr|A2AP88|A2AP88_MOUSE Zinc finger CCCH domain-containing protein 6 OS=Mus musculus GN=Zc3h6 PE=4 SV=1;sp|Q8BYK8|ZC3H6_MOUSE Zinc finger CCCH domain-containing protein 6 OS=Mus musculus GN=Zc3h6 PE=2 SV=2	199610000	56867000	19320000	56878000	9691300	45956000	269370000	203060000	31035000	15115000	3383200	963850	327450	964030	164260	778920	4565500	3441700	526010	143740000	127580000	107810000	95414000	34983000	92406000	0	0	0	3	2	2	2.1	2.1	2.1	131.26	0	7.1396	891780000	13	2	2	2	3	2
264	A2AP93;A2AP92;Q543B5;Q3TXG1;Q923A8;Q62073	A2AP93;A2AP92;Q543B5;Q3TXG1;Q923A8;Q62073	Mitogen-activated protein kinase kinase kinase 7	Map3k7	tr|A2AP93|A2AP93_MOUSE Mitogen-activated protein kinase kinase kinase 7 OS=Mus musculus GN=Map3k7 PE=1 SV=1;tr|A2AP92|A2AP92_MOUSE Mitogen-activated protein kinase kinase kinase 7 OS=Mus musculus GN=Map3k7 PE=1 SV=1;tr|Q543B5|Q543B5_MOUSE Mitogen activated	22789000	8960400	3522500	21363000	15498000	3937800	54116000	33804000	10367000	7580700	990810	389580	153150	928830	673820	171210	2352900	1469700	450740	25726000	32269000	32278000	37195000	37337000	26358000	76604000	61680000	28326000	4	4	4	11.4	11.4	11.4	53.749	0.00086718	3.5765	174360000	21	3	3	3	4	3
265	A2APB1;Q8BMS9;A2AVI0;Q8CB96-2;Q8CB96	A2APB1;Q8BMS9;A2AVI0	Ras association domain-containing protein 2	Rassf2	tr|A2APB1|A2APB1_MOUSE Ras association domain-containing protein 2 (Fragment) OS=Mus musculus GN=Rassf2 PE=4 SV=1;sp|Q8BMS9|RASF2_MOUSE Ras association domain-containing protein 2 OS=Mus musculus GN=Rassf2 PE=2 SV=1;tr|A2AVI0|A2AVI0_MOUSE Ras association d	23289000	18452000	2744100	8765400	6853700	1629300	61455000	22078000	30425000	13515000	1791500	1419400	211090	674260	527210	125330	4727300	1698300	2340400	69301000	39354000	0	0	0	0	70419000	47032000	87188000	4	4	4	26.2	26.2	26.2	23.266	0	9.5307	175690000	11	2	2	1	1	1
266	A2API5;Q9JI18;E9Q202;F6YDG9	A2API5;Q9JI18;E9Q202	Low-density lipoprotein receptor-related protein 1B	Lrp1b	tr|A2API5|A2API5_MOUSE Low-density lipoprotein receptor-related protein 1B OS=Mus musculus GN=Lrp1b PE=4 SV=1;sp|Q9JI18|LRP1B_MOUSE Low-density lipoprotein receptor-related protein 1B OS=Mus musculus GN=Lrp1b PE=1 SV=1;tr|E9Q202|E9Q202_MOUSE Low-density li	6196700	14649000	806820	11445000	19789000	9530600	26969000	12672000	10629000	456220	25088	59306	3266.5	46336	80119	38585	109190	51302	43032	16116000	37420000	0	14345000	0	0	21593000	20826000	22979000	10	7	7	2.4	1.9	1.9	517.03	0.001398	2.9841	112690000	10	3	5	2	7	6
267	Q3UNN2;Q3U8S1;Q3U468;A2APM5;A2APM3;A2APM4;E9QKM8;Q80X37;A2APM1;A2APM2;P15379-2;P15379-3;P15379-6;P15379-11;P15379-5;P15379-10;P15379-9;P15379-4;P15379-8;P15379-7;P15379;Q3TLT9;P15379-12;P15379-13	Q3UNN2;Q3U8S1;Q3U468;A2APM5;A2APM3;A2APM4;E9QKM8;Q80X37;A2APM1;A2APM2;P15379-2;P15379-3;P15379-6;P15379-11;P15379-5;P15379-10;P15379-9;P15379-4;P15379-8;P15379-7;P15379;Q3TLT9;P15379-12;P15379-13	CD44 antigen	Cd44	tr|Q3UNN2|Q3UNN2_MOUSE Putative uncharacterized protein OS=Mus musculus GN=Cd44 PE=2 SV=1;tr|Q3U8S1|Q3U8S1_MOUSE CD44 antigen OS=Mus musculus GN=Cd44 PE=1 SV=1;tr|Q3U468|Q3U468_MOUSE Putative uncharacterized protein OS=Mus musculus GN=Cd44 PE=2 SV=1;tr|A2A	122970000	39510000	50663000	309620000	241120000	137920000	45017000	40733000	0	65837000	8198200	2634000	3377500	20642000	16075000	9194500	3001100	2715500	0	177960000	151280000	0	405020000	257920000	330660000	0	82371000	0	3	3	3	12.9	12.9	12.9	40.247	0	26.929	987560000	20	2	2	1	3	3
268	A2APT9	A2APT9	Kelch domain-containing protein 7A	Klhdc7a	sp|A2APT9|KLD7A_MOUSE Kelch domain-containing protein 7A OS=Mus musculus GN=Klhdc7a PE=1 SV=3	0	0	202710	0	461600	707780	0	0	0	36107	0	0	5334.4	0	12147	18626	0	0	0	0	0	0	0	0	1936700	0	0	0	1	1	1	1.4	1.4	1.4	83.589	0.00015279	4.8306	1372100	1	0	0	1	0	1
269	A2APV2-3;E9PXE6;F8VPR2;A2APV2-2;A2APV2;F6XR20;Q6P247;A2AQW2;Q8BI52;A2AQW3	A2APV2-3;E9PXE6;F8VPR2;A2APV2-2;A2APV2	Formin-like protein 2	Fmnl2	sp|A2APV2-3|FMNL2_MOUSE Isoform 3 of Formin-like protein 2 OS=Mus musculus GN=Fmnl2;tr|E9PXE6|E9PXE6_MOUSE Formin-like protein 2 OS=Mus musculus GN=Fmnl2 PE=4 SV=2;tr|F8VPR2|F8VPR2_MOUSE Formin-like protein 2 OS=Mus musculus GN=Fmnl2 PE=4 SV=1;sp|A2APV2-2|	609730000	297990000	157930000	847930000	799040000	464350000	750300000	500680000	342460000	70153000	8966700	4382200	2322500	12470000	11751000	6828700	11034000	7362900	5036100	633030000	716150000	705420000	747540000	813270000	794100000	802090000	785730000	829910000	27	27	15	23.9	23.9	13.7	123.98	0	50.906	4770400000	140	19	20	12	22	23
270	A2APX7;A2APX6;A2APX8;Q05BQ0;Q68V28;Q68V26;F6U9Y2;F7AMU5;Q3UQV9;A2APX9;K3W4P8;B2X2D5;Q3UF73;Q9JKC5;Q6QIY3-3	A2APX7;A2APX6;A2APX8	Sodium channel protein	Scn1a	tr|A2APX7|A2APX7_MOUSE Sodium channel protein OS=Mus musculus GN=Scn1a PE=3 SV=1;tr|A2APX6|A2APX6_MOUSE Sodium channel protein OS=Mus musculus GN=Scn1a PE=3 SV=1;tr|A2APX8|A2APX8_MOUSE Sodium channel protein OS=Mus musculus GN=Scn1a PE=3 SV=1	292610000	144840000	116250000	291240000	357960000	199600000	560960000	356680000	157080000	31759000	3751400	1856900	1490400	3733800	4589300	2558900	7191800	4572800	2013900	430310000	326910000	340720000	460960000	499550000	420100000	541370000	528280000	488970000	42	21	19	22.4	13	12	226	0	148.81	2477200000	89	33	30	24	36	34
271	B2RXU2;A2APY6;Q3V1V3;Q8BM03;Q9D801;Q8BK69	B2RXU2;A2APY6;Q3V1V3;Q8BM03;Q9D801;Q8BK69	ESF1 homolog	Esf1	tr|B2RXU2|B2RXU2_MOUSE ESF1, nucleolar pre-rRNA processing protein, homolog (S. cerevisiae) OS=Mus musculus GN=Esf1 PE=2 SV=1;tr|A2APY6|A2APY6_MOUSE ESF1, nucleolar pre-rRNA processing protein, homolog (S. cerevisiae) OS=Mus musculus GN=Esf1 PE=2 SV=1;sp|Q	5386700	1486700	541030	9819000	26522000	13797000	873350	0	0	1358700	125270	34574	12582	228350	616780	320870	20310	0	0	4853200	0	0	16548000	33116000	20968000	1645300	0	0	2	2	2	2.7	2.7	2.7	98.042	0.00015286	4.847	58426000	7	1	1	1	1	2
272	A2APY7;A2APY7-2	A2APY7;A2APY7-2	NADH dehydrogenase [ubiquinone] 1 alpha subcomplex assembly factor 5	Ndufaf5	sp|A2APY7|NDUF5_MOUSE NADH dehydrogenase [ubiquinone] 1 alpha subcomplex assembly factor 5 OS=Mus musculus GN=Ndufaf5 PE=2 SV=1;sp|A2APY7-2|NDUF5_MOUSE Isoform 2 of NADH dehydrogenase [ubiquinone] 1 alpha subcomplex assembly factor 5 OS=Mus musculus GN=Ndu	150960000	35235000	16125000	230040000	230870000	83228000	191190000	120910000	38242000	52228000	7188700	1677900	767870	10954000	10994000	3963200	9104000	5757500	1821100	169060000	132090000	160150000	201510000	169150000	153520000	150100000	137090000	150270000	10	10	10	36.7	36.7	36.7	38.404	0	30.474	1096800000	67	9	7	4	9	9
273	A2AQ17;Q9CWX2	A2AQ17;Q9CWX2	Complex I intermediate-associated protein 30, mitochondrial	Ndufaf1	tr|A2AQ17|A2AQ17_MOUSE Complex I intermediate-associated protein 30, mitochondrial OS=Mus musculus GN=Ndufaf1 PE=4 SV=1;sp|Q9CWX2|CIA30_MOUSE Complex I intermediate-associated protein 30, mitochondrial OS=Mus musculus GN=Ndufaf1 PE=2 SV=2	109660000	28975000	27376000	154770000	152340000	85484000	134770000	81880000	32870000	33672000	4569300	1207300	1140700	6448700	6347700	3561900	5615500	3411700	1369600	102060000	114480000	147310000	142370000	122260000	121880000	90803000	121380000	94094000	14	14	14	50.9	50.9	50.9	37.782	0	24.644	808130000	55	11	8	5	12	12
274	A2AQ19;Q3UXG8	A2AQ19;Q3UXG8	RNA polymerase-associated protein RTF1 homolog	Rtf1	sp|A2AQ19|RTF1_MOUSE RNA polymerase-associated protein RTF1 homolog OS=Mus musculus GN=Rtf1 PE=1 SV=1;tr|Q3UXG8|Q3UXG8_MOUSE Putative uncharacterized protein (Fragment) OS=Mus musculus GN=Rtf1 PE=2 SV=1	35724000	17551000	10956000	94203000	113310000	36525000	12835000	1365200	0	7677800	850570	417890	260870	2242900	2697800	869650	305600	32504	0	63567000	68225000	40891000	67729000	81428000	68814000	17986000	0	0	9	9	9	13.4	13.4	13.4	80.796	0	14.223	322470000	18	3	4	5	7	5
275	E9QAU4;A2AQ25;D3Z781;A2AQ25-4;A2AQ25-3;A2AQ25-8;A2AQ25-2;A2AQ25-9;A2AQ25-6;A2AQ25-5;Q8BHR1;Q3UFL8;Q3TYN4;A2AQ25-7	E9QAU4;A2AQ25;D3Z781;A2AQ25-4;A2AQ25-3;A2AQ25-8;A2AQ25-2;A2AQ25-9;A2AQ25-6;A2AQ25-5	Sickle tail protein	Etl4;Skt	tr|E9QAU4|E9QAU4_MOUSE Sickle tail protein OS=Mus musculus GN=Etl4 PE=1 SV=1;sp|A2AQ25|SKT_MOUSE Sickle tail protein OS=Mus musculus GN=Skt PE=1 SV=1;tr|D3Z781|D3Z781_MOUSE Sickle tail protein OS=Mus musculus GN=Etl4 PE=1 SV=2;sp|A2AQ25-4|SKT_MOUSE Isoform	169520000	56024000	21421000	262370000	164720000	88340000	319390000	171960000	29754000	10106000	1334800	441140	168670	2065900	1297000	695590	2514900	1354000	234290	226140000	197380000	139540000	277100000	306070000	226060000	237660000	184070000	123670000	21	21	2	13.7	13.7	1	218.44	0	37.522	1283500000	78	18	13	7	17	14
276	A2AQ45;Q80TY0;A2AQ44;A2AQ42;A2AQ41;Q80TY0-4;A2AQ39	A2AQ45;Q80TY0;A2AQ44;A2AQ42;A2AQ41;Q80TY0-4	Formin-binding protein 1	Fnbp1	tr|A2AQ45|A2AQ45_MOUSE Formin-binding protein 1 OS=Mus musculus GN=Fnbp1 PE=1 SV=1;sp|Q80TY0|FNBP1_MOUSE Formin-binding protein 1 OS=Mus musculus GN=Fnbp1 PE=1 SV=2;tr|A2AQ44|A2AQ44_MOUSE Formin-binding protein 1 OS=Mus musculus GN=Fnbp1 PE=1 SV=1;tr|A2AQ4	764120000	222870000	150410000	693290000	665290000	396380000	1575700000	976110000	492460000	160450000	20652000	6023600	4065100	18738000	17981000	10713000	42586000	26381000	13310000	928400000	827680000	772690000	815600000	730040000	829890000	1391500000	1301900000	1391000000	24	24	2	40.9	40.9	4.4	68.977	0	77.033	5936600000	171	21	16	13	18	17
277	A2AQ53;O88840;Q61554;Q60784;Q7TMG6;Q99L19;Q3TNW1	A2AQ53;O88840;Q61554;Q60784	Fibrillin-1	Fbn1	tr|A2AQ53|A2AQ53_MOUSE Fibrillin-1 OS=Mus musculus GN=Fbn1 PE=4 SV=1;tr|O88840|O88840_MOUSE Mutant fibrillin-1 OS=Mus musculus GN=Fbn1 PE=2 SV=1;sp|Q61554|FBN1_MOUSE Fibrillin-1 OS=Mus musculus GN=Fbn1 PE=1 SV=1;tr|Q60784|Q60784_MOUSE Fibrillin-1 (Fragment	39793000	18933000	4965500	16403000	6685800	55284000	67745000	35308000	9996400	1574800	245630	116870	30651	101250	41271	341260	418180	217950	61706	57470000	100960000	0	26155000	0	265700000	53594000	53623000	0	3	3	2	1.3	1.3	0.8	312.3	0	5.1552	255110000	26	3	2	1	2	1
278	A2AQ87;Q8CG80-2;Q8CG80;F7AIV2;F6WJR3;A2AQ88	A2AQ87;Q8CG80-2;Q8CG80	SH2 domain-containing adapter protein F	Shf	tr|A2AQ87|A2AQ87_MOUSE SH2 domain-containing adapter protein F (Fragment) OS=Mus musculus GN=Shf PE=1 SV=1;sp|Q8CG80-2|SHF_MOUSE Isoform 2 of SH2 domain-containing adapter protein F OS=Mus musculus GN=Shf;sp|Q8CG80|SHF_MOUSE SH2 domain-containing adapter p	370530000	178540000	171920000	328980000	155200000	248900000	694310000	641280000	256230000	126910000	15439000	7439100	7163200	13707000	6466500	10371000	28929000	26720000	10676000	374980000	373910000	722170000	367520000	360530000	411210000	641470000	784960000	684300000	13	13	6	48.2	48.2	24.9	47.121	0	128.37	3045900000	70	11	7	4	8	6
279	A2AQA7;Q8CFQ3	A2AQA7;Q8CFQ3	Intron-binding protein aquarius	Aqr	tr|A2AQA7|A2AQA7_MOUSE Intron-binding protein aquarius OS=Mus musculus GN=Aqr PE=4 SV=1;sp|Q8CFQ3|AQR_MOUSE Intron-binding protein aquarius OS=Mus musculus GN=Aqr PE=2 SV=2	222530000	106320000	83578000	793090000	599780000	463930000	96397000	46542000	26770000	30110000	2747300	1312500	1031800	9791200	7404700	5727500	1190100	574590	330490	430490000	398290000	383670000	878960000	753330000	846110000	136710000	130780000	84260000	36	36	36	38.1	38.1	38.1	161.85	0	133.43	2438900000	132	24	21	16	29	30
280	A2AQC3;Q6DI68;Q8C4G3;Q8C288;A2AUZ1;A2AUZ0;A2AQC9	A2AQC3;Q6DI68;Q8C4G3;Q8C288	Phospholipid-transporting ATPase	Atp9a	tr|A2AQC3|A2AQC3_MOUSE Probable phospholipid-transporting ATPase IIA OS=Mus musculus GN=Atp9a PE=4 SV=1;tr|Q6DI68|Q6DI68_MOUSE Atp9a protein (Fragment) OS=Mus musculus GN=Atp9a PE=2 SV=1;tr|Q8C4G3|Q8C4G3_MOUSE Probable phospholipid-transporting ATPase IIA	585310000	195140000	133290000	741680000	900300000	482520000	527350000	454930000	206950000	68185000	9440500	3147400	2149900	11963000	14521000	7782600	8505600	7337500	3337900	897670000	733330000	748080000	953350000	1062300000	1092500000	714340000	756070000	645150000	27	27	3	29.9	29.9	4	124.46	0	92.942	4227500000	165	20	16	13	21	21
281	A2AQD6;A2AQD5;Q922B9-3;Q922B9;Q922B9-2	A2AQD6;A2AQD5;Q922B9-3;Q922B9	Sperm-specific antigen 2 homolog	Ssfa2	tr|A2AQD6|A2AQD6_MOUSE Sperm-specific antigen 2 homolog OS=Mus musculus GN=Ssfa2 PE=1 SV=1;tr|A2AQD5|A2AQD5_MOUSE Sperm-specific antigen 2 homolog OS=Mus musculus GN=Ssfa2 PE=1 SV=1;sp|Q922B9-3|SSFA2_MOUSE Isoform 3 of Sperm-specific antigen 2 homolog OS=M	6137700	0	0	3637700	3189000	0	11423000	16173000	1172900	632320	92995	0	0	55117	48318	0	173080	245040	17772	15322000	0	0	0	0	0	17290000	17164000	0	3	3	3	2.8	2.8	2.8	133.46	0.0011338	3.2127	41733000	6	2	0	0	1	1
282	A2AQE2;Q6A098;Q6IR00;F6QQ13	A2AQE2;Q6A098	Selenocysteine insertion sequence-binding protein 2-like	Secisbp2l	tr|A2AQE2|A2AQE2_MOUSE SECIS binding protein 2-like OS=Mus musculus GN=Secisbp2l PE=1 SV=1;sp|Q6A098|SBP2L_MOUSE Selenocysteine insertion sequence-binding protein 2-like OS=Mus musculus GN=Secisbp2l PE=1 SV=2	3767700	0	0	27593000	9905900	4004500	0	0	38286000	1671100	75354	0	0	551850	198120	80090	0	0	765730	0	0	0	0	0	13974000	0	0	0	3	3	3	3.6	3.6	3.6	119.75	0.0025555	2.3542	83557000	3	2	0	0	2	2
283	A2AQJ7;A2AQJ5;A2AQJ6;Q8BXN9-3;Q8BXN9;Q8BXN9-2	A2AQJ7;A2AQJ5;A2AQJ6;Q8BXN9-3;Q8BXN9;Q8BXN9-2	Transmembrane protein 87A	Tmem87a	tr|A2AQJ7|A2AQJ7_MOUSE Transmembrane protein 87A OS=Mus musculus GN=Tmem87a PE=4 SV=1;tr|A2AQJ5|A2AQJ5_MOUSE Transmembrane protein 87A OS=Mus musculus GN=Tmem87a PE=1 SV=1;tr|A2AQJ6|A2AQJ6_MOUSE Transmembrane protein 87A OS=Mus musculus GN=Tmem87a PE=1 SV=	72709000	29628000	17200000	136890000	65743000	62927000	48552000	36033000	12536000	18547000	2796500	1139500	661550	5265200	2528600	2420300	1867400	1385900	482160	92772000	69958000	92228000	131910000	94278000	78590000	36844000	39492000	29774000	9	9	9	19.4	19.4	19.4	57.011	0	24.284	482220000	30	7	8	4	8	6
284	A2AQJ8;Q8BVW0;Q5DU67;Q3UXV0;Q8BVW0-2	A2AQJ8;Q8BVW0;Q5DU67	Neutral alpha-glucosidase C	Ganc	tr|A2AQJ8|A2AQJ8_MOUSE Neutral alpha-glucosidase C OS=Mus musculus GN=Ganc PE=3 SV=1;sp|Q8BVW0|GANC_MOUSE Neutral alpha-glucosidase C OS=Mus musculus GN=Ganc PE=2 SV=2;tr|Q5DU67|Q5DU67_MOUSE MFLJ00088 protein (Fragment) OS=Mus musculus GN=Ganc PE=2 SV=1	20228000	1712200	4931600	51473000	44336000	9082400	33582000	19432000	3258600	4000800	430390	36429	104930	1095200	943320	193240	714510	413460	69332	33014000	0	0	62134000	41601000	26991000	33016000	21682000	22454000	6	6	6	10.4	10.4	10.4	103.71	0	14.865	188040000	8	3	1	1	5	4
285	A2AQK4;Q91VF2	A2AQK4;Q91VF2	Histamine N-methyltransferase	Hnmt	tr|A2AQK4|A2AQK4_MOUSE Histamine N-methyltransferase OS=Mus musculus GN=Hnmt PE=2 SV=1;sp|Q91VF2|HNMT_MOUSE Histamine N-methyltransferase OS=Mus musculus GN=Hnmt PE=1 SV=1	90546000	46835000	34446000	98753000	66279000	57553000	160180000	155010000	75280000	43605000	5030300	2602000	1913700	5486300	3682200	3197400	8899000	8611800	4182200	124240000	144210000	138310000	125940000	92238000	133140000	211580000	233510000	163750000	9	9	9	40.3	40.3	40.3	33.664	0	23.829	784890000	34	5	6	5	6	5
286	A2AQL0;Q9Z1W9;G1JLS7;Q3V256;Q3TR01	A2AQL0;Q9Z1W9;G1JLS7	STE20/SPS1-related proline-alanine-rich protein kinase	Stk39	tr|A2AQL0|A2AQL0_MOUSE Serine/threonine kinase 39, STE20/SPS1 homolog (Yeast) OS=Mus musculus GN=Stk39 PE=4 SV=1;sp|Q9Z1W9|STK39_MOUSE STE20/SPS1-related proline-alanine-rich protein kinase OS=Mus musculus GN=Stk39 PE=1 SV=1;tr|G1JLS7|G1JLS7_MOUSE Kidney-s	943090000	416480000	217350000	973770000	954800000	663950000	638410000	560120000	354650000	228900000	37724000	16659000	8693900	38951000	38192000	26558000	25536000	22405000	14186000	1218100000	1025800000	797940000	1138500000	1478400000	1296700000	789320000	882390000	885440000	18	18	13	34.9	34.9	27	60.319	0	232.24	5722600000	181	17	17	10	17	14
287	Q8N9U3;Q8C113;A2AQN5;A2AQN4;Q9QXG4;Q8C1A8;Q8C141;F7CU63;D6RHA7;Q8BY91	Q8N9U3;Q8C113;A2AQN5;A2AQN4;Q9QXG4;Q8C1A8;Q8C141	Acetyl-coenzyme A synthetase, cytoplasmic	Acss2	tr|Q8N9U3|Q8N9U3_MOUSE cDNA fis, clone TRACH2001275, highly similar to Mus musculus acetyl-CoA synthetase mRNA OS=Mus musculus GN=Acss2 PE=2 SV=1;tr|Q8C113|Q8C113_MOUSE Putative uncharacterized protein OS=Mus musculus PE=2 SV=1;tr|A2AQN5|A2AQN5_MOUSE Acety	488800000	281290000	113200000	667450000	539080000	228480000	370440000	297000000	149820000	95017000	14812000	8523800	3430400	20226000	16336000	6923600	11225000	9000000	4539900	625250000	760570000	615510000	676470000	872330000	779860000	512450000	443070000	464200000	19	19	19	36.7	36.7	36.7	78.82	0	80.223	3135500000	85	18	17	11	16	15
288	A2AQU8;Q9D975	A2AQU8;Q9D975	Sulfiredoxin-1	Srxn1	tr|A2AQU8|A2AQU8_MOUSE Sulfiredoxin OS=Mus musculus GN=Srxn1 PE=3 SV=1;sp|Q9D975|SRXN1_MOUSE Sulfiredoxin-1 OS=Mus musculus GN=Srxn1 PE=2 SV=1	10023000	0	0	0	0	235490	10188000	11370000	4313400	3613000	1002300	0	0	0	0	23549	1018800	1137000	431340	0	0	0	0	0	0	0	13512000	0	1	1	1	5.8	5.8	5.8	16.063	0.0025545	2.3532	36130000	4	1	0	0	0	0
289	A2AQZ7;Q9DB26;D6RIQ3;D6RI61;A2AQZ5;A2AQZ2;B7ZNN8	A2AQZ7;Q9DB26;D6RIQ3;D6RI61;A2AQZ5;A2AQZ2;B7ZNN8	Phytanoyl-CoA dioxygenase domain-containing protein 1	Phyhd1	tr|A2AQZ7|A2AQZ7_MOUSE Phytanoyl-CoA dioxygenase domain-containing protein 1 OS=Mus musculus GN=Phyhd1 PE=4 SV=1;sp|Q9DB26|PHYD1_MOUSE Phytanoyl-CoA dioxygenase domain-containing protein 1 OS=Mus musculus GN=Phyhd1 PE=2 SV=2;tr|D6RIQ3|D6RIQ3_MOUSE Phytanoy	6785600	7745600	5935800	20774000	12493000	4577900	49214000	34341000	21397000	11662000	484690	553260	423990	1483800	892370	326990	3515300	2452900	1528400	12442000	23608000	21931000	18149000	16499000	0	36154000	53380000	23822000	4	4	4	22.2	22.2	22.2	30.155	0	14.899	163260000	15	1	2	1	2	2
290	Q05CC5;Q504N1;Q05DE4;B2RWT5;A2AR02;Q80VC1;A2AR01;Q3UZ38	Q05CC5;Q504N1;Q05DE4;B2RWT5;A2AR02;Q80VC1;A2AR01;Q3UZ38	Peptidyl-prolyl cis-trans isomerase G;Peptidyl-prolyl cis-trans isomerase	Ppig	tr|Q05CC5|Q05CC5_MOUSE Ppig protein (Fragment) OS=Mus musculus GN=Ppig PE=2 SV=1;tr|Q504N1|Q504N1_MOUSE Ppig protein (Fragment) OS=Mus musculus GN=Ppig PE=2 SV=1;tr|Q05DE4|Q05DE4_MOUSE Ppig protein (Fragment) OS=Mus musculus GN=Ppig PE=2 SV=1;tr|B2RWT5|B2R	181750000	82336000	39955000	396960000	269600000	182000000	56674000	52633000	17924000	63992000	9087600	4116800	1997800	19848000	13480000	9100200	2833700	2631600	896180	249350000	332670000	342000000	531040000	370400000	416810000	105560000	116920000	75692000	8	8	8	25.1	25.1	25.1	46.291	0	41.12	1279800000	53	7	6	3	7	6
291	A2AR12;Q8BKH7;Q8BKH7-2;A2AR15;Q8BKH7-3	A2AR12;Q8BKH7;Q8BKH7-2;A2AR15;Q8BKH7-3	Target of rapamycin complex 2 subunit MAPKAP1	Mapkap1	tr|A2AR12|A2AR12_MOUSE Target of rapamycin complex 2 subunit MAPKAP1 (Fragment) OS=Mus musculus GN=Mapkap1 PE=4 SV=1;sp|Q8BKH7|SIN1_MOUSE Target of rapamycin complex 2 subunit MAPKAP1 OS=Mus musculus GN=Mapkap1 PE=1 SV=1;sp|Q8BKH7-2|SIN1_MOUSE Isoform 2 of	29185000	24045000	23362000	66566000	53315000	37264000	95146000	57112000	38254000	15152000	1042300	858760	834340	2377400	1904100	1330900	3398100	2039700	1366200	44473000	67967000	97318000	136190000	128390000	96535000	90342000	85692000	103270000	9	9	9	22.6	22.6	22.6	58.608	0	13.502	424250000	27	7	7	6	4	3
292	A2AR50-3;A2AR50;A2AR50-4;A2AR50-2	A2AR50-3;A2AR50;A2AR50-4;A2AR50-2	Ras-specific guanine nucleotide-releasing factor RalGPS1	Ralgps1	sp|A2AR50-3|RGPS1_MOUSE Isoform 3 of Ras-specific guanine nucleotide-releasing factor RalGPS1 OS=Mus musculus GN=Ralgps1;sp|A2AR50|RGPS1_MOUSE Ras-specific guanine nucleotide-releasing factor RalGPS1 OS=Mus musculus GN=Ralgps1 PE=1 SV=2;sp|A2AR50-4|RGPS1_M	6724700	0	659540	8572000	9021500	2860500	2632000	4011200	1896700	1347300	249060	0	24427	317480	334130	105940	97483	148560	70247	13018000	0	0	14575000	16591000	10703000	0	11604000	0	2	2	2	5.4	5.4	5.4	58.032	0.0043911	1.8503	36378000	5	2	0	1	2	2
293	A2AR56;Q6P5H6;B0R0D5;B0R0D4;Q6P5H6-2;F6XM46;Q8BXT6;Q6P5H6-4;Q6P5H6-3;Q8BX61;Q8BW31;F2Z484;F6XLQ6	A2AR56;Q6P5H6;B0R0D5;B0R0D4;Q6P5H6-2;F6XM46;Q8BXT6;Q6P5H6-4;Q6P5H6-3	FERM domain-containing protein 5	Frmd5	tr|A2AR56|A2AR56_MOUSE FERM domain-containing protein 5 OS=Mus musculus GN=Frmd5 PE=4 SV=1;sp|Q6P5H6|FRMD5_MOUSE FERM domain-containing protein 5 OS=Mus musculus GN=Frmd5 PE=2 SV=1;tr|B0R0D5|B0R0D5_MOUSE FERM domain-containing protein 5 (Fragment) OS=Mus m	160150000	79233000	36191000	104290000	77605000	57616000	475530000	275210000	153990000	36405000	4106400	2031600	927990	2674000	1989900	1477300	12193000	7056800	3948400	214330000	250930000	266520000	150360000	173840000	204950000	407070000	401500000	373960000	18	18	18	37.4	37.4	37.4	64.919	0	81.066	1419800000	74	11	11	6	7	7
294	A2AR99;Q9R1W5	A2AR99;Q9R1W5	Calcitonin gene-related peptide type 1 receptor	Calcrl	tr|A2AR99|A2AR99_MOUSE Calcitonin receptor-like OS=Mus musculus GN=Calcrl PE=2 SV=1;sp|Q9R1W5|CALRL_MOUSE Calcitonin gene-related peptide type 1 receptor OS=Mus musculus GN=Calcrl PE=2 SV=2	58367000	12873000	7103400	30452000	49510000	19423000	104610000	69299000	37322000	27783000	4169100	919510	507390	2175200	3536500	1387300	7472300	4949900	2665900	41478000	27353000	0	44474000	26464000	15924000	87893000	102290000	69966000	3	3	3	7.3	7.3	7.3	53.264	0	16.727	388960000	14	3	3	1	3	3
295	A2ARI4-2;A2ARI4	A2ARI4-2;A2ARI4	Leucine-rich repeat-containing G-protein coupled receptor 4	Lgr4	sp|A2ARI4-2|LGR4_MOUSE Isoform 2 of Leucine-rich repeat-containing G-protein coupled receptor 4 OS=Mus musculus GN=Lgr4;sp|A2ARI4|LGR4_MOUSE Leucine-rich repeat-containing G-protein coupled receptor 4 OS=Mus musculus GN=Lgr4 PE=1 SV=1	1889400	2245200	0	1124800	1755400	0	4422400	5932400	0	482490	52484	62367	0	31245	48761	0	122850	164790	0	0	0	0	0	0	0	0	9318600	0	1	1	1	1.1	1.1	1.1	101.34	0.0038986	1.9446	17370000	3	1	1	0	1	1
296	B9EHS3;A2ARP1-3;A2ARP1-2;A2ARP1;A2ARP1-7;A2ARP1-6;F6Q5C6;F7AST3;A2ARP1-5;F6VU93;F6VID9	B9EHS3;A2ARP1-3;A2ARP1-2;A2ARP1;A2ARP1-7	Inositol hexakisphosphate and diphosphoinositol-pentakisphosphate kinase 1	Ppip5k1	tr|B9EHS3|B9EHS3_MOUSE Hisppd2a protein OS=Mus musculus GN=Ppip5k1 PE=2 SV=1;sp|A2ARP1-3|VIP1_MOUSE Isoform 3 of Inositol hexakisphosphate and diphosphoinositol-pentakisphosphate kinase 1 OS=Mus musculus GN=Ppip5k1;sp|A2ARP1-2|VIP1_MOUSE Isoform 2 of Inosi	70340000	30328000	22615000	122720000	124520000	44824000	198120000	178230000	36490000	10618000	901790	388810	289930	1573400	1596400	574670	2540000	2285100	467820	98390000	70074000	200020000	68793000	130010000	86266000	175880000	172440000	154280000	15	15	12	12.4	12.4	9.6	165.42	0	20.128	828190000	40	13	11	9	14	12
297	A2ARP8;Q9QYR6-2;Q9QYR6	A2ARP8;Q9QYR6-2;Q9QYR6	Microtubule-associated protein 1A;MAP1A heavy chain;MAP1 light chain LC2	Map1a	tr|A2ARP8|A2ARP8_MOUSE Microtubule-associated protein 1A OS=Mus musculus GN=Map1a PE=1 SV=1;sp|Q9QYR6-2|MAP1A_MOUSE Isoform 2 of Microtubule-associated protein 1A OS=Mus musculus GN=Map1a;sp|Q9QYR6|MAP1A_MOUSE Microtubule-associated protein 1A OS=Mus muscu	10101000000	4874200000	3574300000	19462000000	14161000000	9306600000	12432000000	8427600000	4737400000	604700000	70149000	33849000	24821000	135150000	98339000	64629000	86333000	58525000	32899000	14049000000	15702000000	16876000000	19850000000	20483000000	21742000000	12008000000	12577000000	12258000000	130	130	127	59.1	59.1	58.3	325.88	0	323.31	87076000000	1405	104	100	83	121	117
298	A2AS33;Q3UYG8	A2AS33;Q3UYG8	O-acetyl-ADP-ribose deacetylase MACROD2	Macrod2	tr|A2AS33|A2AS33_MOUSE O-acetyl-ADP-ribose deacetylase MACROD2 OS=Mus musculus GN=Macrod2 PE=4 SV=1;sp|Q3UYG8|MACD2_MOUSE O-acetyl-ADP-ribose deacetylase MACROD2 OS=Mus musculus GN=Macrod2 PE=2 SV=1	54063000	55718000	9178000	64694000	105170000	41377000	163480000	90832000	53836000	31917000	2703200	2785900	458900	3234700	5258700	2068800	8173800	4541600	2691800	92130000	151150000	0	79544000	118280000	95056000	188740000	117190000	201190000	5	5	5	21.5	21.5	21.5	46.481	0	11.514	638350000	28	3	3	1	4	5
299	A2AS57;Q8BXJ8;G5E8Y8;Q8BXJ8-2;Q80ZR3;Q8BM98	A2AS57;Q8BXJ8;G5E8Y8;Q8BXJ8-2	Zinc finger protein 385B	Zfp385b;Znf385b	tr|A2AS57|A2AS57_MOUSE Zinc finger protein 385B OS=Mus musculus GN=Zfp385b PE=2 SV=1;sp|Q8BXJ8|Z385B_MOUSE Zinc finger protein 385B OS=Mus musculus GN=Znf385b PE=2 SV=1;tr|G5E8Y8|G5E8Y8_MOUSE Zinc finger protein 385B OS=Mus musculus GN=Zfp385b PE=4 SV=1;sp	181490000	130380000	63978000	279270000	340730000	160110000	30455000	27226000	13192000	43815000	6481800	4656500	2284900	9973900	12169000	5718000	1087700	972370	471130	317860000	374110000	382600000	362060000	347900000	432890000	46593000	67664000	52753000	8	8	8	20.3	20.3	20.3	51.356	0	55.975	1226800000	41	8	7	4	8	6
300	A2ASR6;A2ASR7;A2ASR8;Q3ULL2;Q2LC58;P25916;A2ASR5;P23798	A2ASR6;A2ASR7;A2ASR8;Q3ULL2;Q2LC58;P25916;A2ASR5;P23798	Polycomb complex protein BMI-1;Polycomb group RING finger protein 2	Bmi1;Pcgf2	tr|A2ASR6|A2ASR6_MOUSE Polycomb complex protein BMI-1 (Fragment) OS=Mus musculus GN=Bmi1 PE=4 SV=1;tr|A2ASR7|A2ASR7_MOUSE Polycomb complex protein BMI-1 (Fragment) OS=Mus musculus GN=Bmi1 PE=4 SV=1;tr|A2ASR8|A2ASR8_MOUSE Polycomb complex protein BMI-1 (Fra	19419000	1591900	1866400	38048000	63415000	30254000	0	3007700	982760	26431000	3236600	265320	311070	6341300	10569000	5042400	0	501290	163790	0	0	0	18412000	38170000	54267000	0	0	0	2	2	2	18.1	18.1	18.1	12.248	0.0019115	2.5596	158590000	5	1	1	1	2	2
301	E9Q8N1;E9Q8K5;A2ASS6;A2ASS6-2;Q8BUJ6;Q8BIH3;Q8BM32;Q812E1;F6RSJ3;F7CR78	E9Q8N1;E9Q8K5;A2ASS6;A2ASS6-2	Titin	Ttn	tr|E9Q8N1|E9Q8N1_MOUSE Titin OS=Mus musculus GN=Ttn PE=1 SV=1;tr|E9Q8K5|E9Q8K5_MOUSE Titin OS=Mus musculus GN=Ttn PE=1 SV=1;sp|A2ASS6|TITIN_MOUSE Titin OS=Mus musculus GN=Ttn PE=1 SV=1;sp|A2ASS6-2|TITIN_MOUSE Isoform 2 of Titin OS=Mus musculus GN=Ttn	623510000	422310000	275150000	622400000	155600000	600570000	399350000	405440000	133400000	1625400	278600	188700	122950	278100	69528	268350	178440	181160	59605	637650000	520030000	398210000	537950000	572370000	451930000	1416400000	592760000	915880000	18	17	15	0.6	0.5	0.5	3716	0.0025562	2.356	3637700000	34	12	10	8	8	7
302	A2AST1;E9Q8Q6;Q8BLD3;Q8BLW1;Q9D003	A2AST1;E9Q8Q6;Q8BLD3;Q8BLW1		Ccdc141	tr|A2AST1|A2AST1_MOUSE Coiled-coil protein associated with myosin II and DISC1 OS=Mus musculus GN=Ccdc141 PE=2 SV=1;tr|E9Q8Q6|E9Q8Q6_MOUSE Protein Ccdc141 OS=Mus musculus GN=Ccdc141 PE=4 SV=2;tr|Q8BLD3|Q8BLD3_MOUSE Putative uncharacterized protein (Fragmen	25260000	0	2974400	17532000	23678000	1075500	15523000	5168300	6150400	1046900	271620	0	31983	188510	254600	11565	166910	55573	66134	18218000	0	0	0	0	0	21495000	0	0	4	4	4	3.4	3.4	3.4	164.9	0.0038966	1.9353	97361000	5	4	0	1	2	1
303	A2ASW4;Q9EQZ6-3;Q9EQZ6;Q571A8;A2ASW8;Q9EQZ6-2;Q9CS95	A2ASW4;Q9EQZ6-3;Q9EQZ6;Q571A8;A2ASW8;Q9EQZ6-2	Rap guanine nucleotide exchange factor 4	Rapgef4	tr|A2ASW4|A2ASW4_MOUSE Rapgef4 protein OS=Mus musculus GN=Rapgef4 PE=2 SV=1;sp|Q9EQZ6-3|RPGF4_MOUSE Isoform 3 of Rap guanine nucleotide exchange factor 4 OS=Mus musculus GN=Rapgef4;sp|Q9EQZ6|RPGF4_MOUSE Rap guanine nucleotide exchange factor 4 OS=Mus muscu	1559400000	502940000	283330000	887790000	759600000	330540000	3622200000	3308100000	1383000000	200580000	24752000	7983100	4497200	14092000	12057000	5246700	57495000	52509000	21952000	1811900000	1653200000	1596700000	726030000	898950000	682270000	3480700000	3981200000	3221400000	41	41	40	44.4	44.4	43.4	115.49	0	323.31	12637000000	295	34	32	21	28	30
304	A2ASX1;A2ASX2;Q9JLM9	A2ASX1;A2ASX2;Q9JLM9	Growth factor receptor-bound protein 14	Grb14	tr|A2ASX1|A2ASX1_MOUSE Growth factor receptor-bound protein 14 (Fragment) OS=Mus musculus GN=Grb14 PE=4 SV=1;tr|A2ASX2|A2ASX2_MOUSE Growth factor receptor bound protein 14 OS=Mus musculus GN=Grb14 PE=2 SV=1;sp|Q9JLM9|GRB14_MOUSE Growth factor receptor-boun	0	0	0	0	3591900000	0	0	0	0	276300000	0	0	0	0	276300000	0	0	0	0	0	0	0	0	2348300000	0	0	0	0	1	1	1	5	5	5	25.629	0.0063404	1.6453	3591900000	1	0	0	0	0	1
305	A2ASY0;A2ASY1;Q5HZG4;Q8BKP6;Q505H1;Q05BL5	A2ASY0;A2ASY1;Q5HZG4;Q8BKP6;Q505H1;Q05BL5	Transcription initiation factor TFIID subunit 3	Taf3	tr|A2ASY0|A2ASY0_MOUSE Transcription initiation factor TFIID subunit 3 OS=Mus musculus GN=Taf3 PE=1 SV=1;tr|A2ASY1|A2ASY1_MOUSE TAF3 RNA polymerase II, TATA box binding protein (TBP)-associated factor OS=Mus musculus GN=Taf3 PE=2 SV=1;sp|Q5HZG4|TAF3_MOUSE	7733100	5494000	997880	31505000	32365000	19994000	1546300	846450	0	2791100	214810	152610	27719	875140	899020	555380	42953	23513	0	18964000	24472000	0	40833000	51553000	32091000	0	0	0	5	5	5	9.6	9.6	9.6	87.867	0	7.2103	100480000	9	3	3	1	5	5
306	A2ASZ8-3;A2ASZ8-2;A2ASZ8;Z4YLR9;F6RC04;B8ZHC8;Q8BVN7-2;Q8BVN7	A2ASZ8-3;A2ASZ8-2;A2ASZ8	Calcium-binding mitochondrial carrier protein SCaMC-2	Slc25a25	sp|A2ASZ8-3|SCMC2_MOUSE Isoform 3 of Calcium-binding mitochondrial carrier protein SCaMC-2 OS=Mus musculus GN=Slc25a25;sp|A2ASZ8-2|SCMC2_MOUSE Isoform 2 of Calcium-binding mitochondrial carrier protein SCaMC-2 OS=Mus musculus GN=Slc25a25;sp|A2ASZ8|SCMC2_MO	0	817760	0	3799000	2884100	0	0	3946900	0	369280	0	26380	0	122550	93034	0	0	127320	0	0	0	0	0	0	0	0	4560000	0	24	1	1	53.5	2.7	2.7	56.772	0.0025466	2.3103	11448000	1	23	22	19	22	23
307	A2ASZ8-5;A2ASZ8-4	A2ASZ8-5;A2ASZ8-4	Calcium-binding mitochondrial carrier protein SCaMC-2	Slc25a25	sp|A2ASZ8-5|SCMC2_MOUSE Isoform 5 of Calcium-binding mitochondrial carrier protein SCaMC-2 OS=Mus musculus GN=Slc25a25;sp|A2ASZ8-4|SCMC2_MOUSE Isoform 4 of Calcium-binding mitochondrial carrier protein SCaMC-2 OS=Mus musculus GN=Slc25a25	1570900000	672390000	370230000	2598500000	2529900000	1267900000	2667600000	1337600000	830910000	407230000	46204000	19776000	10889000	76428000	74408000	37290000	78458000	39340000	24438000	2122000000	2107200000	1661800000	2593100000	2339600000	2366200000	2312100000	2049900000	1915000000	25	25	2	57.3	57.3	5.2	56.077	0	323.31	13846000000	414	25	22	21	23	24
308	A2AT37;F6Q3G7	A2AT37		Upf2	tr|A2AT37|A2AT37_MOUSE Protein Upf2 OS=Mus musculus GN=Upf2 PE=2 SV=1	101810000	23082000	14505000	124950000	128380000	46983000	138020000	106390000	27846000	9888400	1414000	320580	201460	1735400	1783100	652540	1917000	1477600	386740	124390000	97438000	106140000	113420000	125730000	139900000	185970000	176550000	178970000	19	19	19	18.7	18.7	18.7	147.55	0	27.108	711960000	45	15	8	5	14	12
309	A2AT93	A2AT93		Plcb4	tr|A2AT93|A2AT93_MOUSE Protein Plcb4 (Fragment) OS=Mus musculus GN=Plcb4 PE=4 SV=1	4104800	700800	0	0	5974200	0	45619000	39979000	9594500	6233600	241460	41224	0	0	351430	0	2683400	2351700	564380	0	0	0	0	0	0	29012000	36215000	0	10	1	1	44.7	8.6	8.6	29.456	0	7.8324	105970000	5	9	6	4	7	7
310	Q3TG07;A2ATI9;Q3TX06;Q3TIK1;Q99JX3;Q99JX3-2;A2ATI8;A2ATI6;Q3V458;Q922I9	Q3TG07;A2ATI9;Q3TX06;Q3TIK1;Q99JX3;Q99JX3-2;A2ATI8;A2ATI6;Q3V458	Golgi reassembly-stacking protein 2	Gorasp2	tr|Q3TG07|Q3TG07_MOUSE Putative uncharacterized protein OS=Mus musculus GN=Gorasp2 PE=2 SV=1;tr|A2ATI9|A2ATI9_MOUSE Golgi reassembly stacking protein 2, isoform CRA_d OS=Mus musculus GN=Gorasp2 PE=1 SV=1;tr|Q3TX06|Q3TX06_MOUSE Putative uncharacterized prot	289680000	125890000	41244000	485490000	380840000	241700000	242450000	78766000	80447000	131100000	19312000	8392900	2749600	32366000	25389000	16113000	16163000	5251100	5363100	261560000	420770000	284860000	314250000	263380000	269650000	162720000	174270000	108430000	10	10	10	29.7	29.7	29.7	44.999	0	40.449	1966500000	62	9	7	1	9	9
311	A2ATL0;A2ATK9;A2ATL1;Q8K2R1;A2ATK8	A2ATL0;A2ATK9;A2ATL1;Q8K2R1		Fam171a1	tr|A2ATL0|A2ATL0_MOUSE Protein Fam171a1 OS=Mus musculus GN=Fam171a1 PE=4 SV=1;tr|A2ATK9|A2ATK9_MOUSE Family with sequence similarity 171, member A1 OS=Mus musculus GN=Fam171a1 PE=2 SV=1;tr|A2ATL1|A2ATL1_MOUSE MCG17280 OS=Mus musculus GN=Fam171a1 PE=4 SV=1;	6284800	2705200	0	13115000	8115400	7969600	25272000	23394000	13071000	2437300	153290	65979	0	319880	197940	194380	616380	570590	318810	16016000	13537000	0	0	12401000	14475000	21807000	24384000	24635000	6	5	5	8.9	7.9	7.9	97.237	0	5.4481	99927000	13	2	2	0	3	2
312	A2ATN9;Q9ES70	A2ATN9;Q9ES70	Serine/threonine-protein kinase Nek6	Nek6	tr|A2ATN9|A2ATN9_MOUSE Serine/threonine-protein kinase Nek6 OS=Mus musculus GN=Nek6 PE=4 SV=1;sp|Q9ES70|NEK6_MOUSE Serine/threonine-protein kinase Nek6 OS=Mus musculus GN=Nek6 PE=1 SV=1	2500300	1159700	0	1567100	1984400	0	2506300	2559900	0	613890	125020	57985	0	78356	99221	0	125320	128000	0	0	0	0	0	0	0	0	3263800	0	2	1	1	7.9	5.3	5.3	34.721	0.0097366	1.481	12278000	3	2	2	0	2	2
313	A2ATP6;A2ATP5;Q8C854-1;Q8C854-2;F6XJA1	A2ATP6;A2ATP5;Q8C854-1;Q8C854-2;F6XJA1	Myelin expression factor 2	Myef2	tr|A2ATP6|A2ATP6_MOUSE Myelin expression factor 2 OS=Mus musculus GN=Myef2 PE=4 SV=2;tr|A2ATP5|A2ATP5_MOUSE Myelin expression factor 2 OS=Mus musculus GN=Myef2 PE=4 SV=1;sp|Q8C854-1|MYEF2_MOUSE Isoform 3 of Myelin expression factor 2 OS=Mus musculus GN=Mye	8410200	0	0	13656000	0	0	0	0	0	630470	240290	0	0	390180	0	0	0	0	0	0	0	0	14202000	0	0	0	0	0	35	1	1	68.3	3.7	3.7	61.103	1	-2	22067000	3	31	29	27	32	31
314	A2ATU0	A2ATU0	Probable 2-oxoglutarate dehydrogenase E1 component DHKTD1, mitochondrial	Dhtkd1	sp|A2ATU0|DHTK1_MOUSE Probable 2-oxoglutarate dehydrogenase E1 component DHKTD1, mitochondrial OS=Mus musculus GN=Dhtkd1 PE=1 SV=1	14906000	7297500	2885800	10608000	28675000	17485000	44398000	28598000	7983700	3971600	363570	177990	70385	258730	699390	426460	1082900	697510	194730	29775000	33202000	0	22410000	31685000	36385000	54807000	35610000	38467000	5	5	5	9	9	9	102.79	0	16.942	162840000	14	3	2	1	3	4
315	Q3TYI5;A2ATZ8;Q8R0S4;Q8R0S4-2;Q8R0S4-1;J3QK20;O88518	Q3TYI5;A2ATZ8;Q8R0S4;Q8R0S4-2;Q8R0S4-1;J3QK20	Voltage-dependent L-type calcium channel subunit beta-4	Cacnb4	tr|Q3TYI5|Q3TYI5_MOUSE Putative uncharacterized protein (Fragment) OS=Mus musculus GN=Cacnb4 PE=2 SV=1;tr|A2ATZ8|A2ATZ8_MOUSE Calcium channel, voltage-dependent, beta 4 subunit OS=Mus musculus GN=Cacnb4 PE=4 SV=1;sp|Q8R0S4|CACB4_MOUSE Voltage-dependent L-t	1185300000	563950000	409350000	1375900000	1142900000	662010000	3276600000	2100000000	1096400000	381050000	38234000	18192000	13205000	44385000	36869000	21355000	105700000	67743000	35368000	1711900000	1807700000	1935900000	1660700000	1847500000	1764500000	4391500000	4106300000	3814500000	21	21	10	51.7	51.7	29.9	57.662	0	323.31	11812000000	306	19	19	16	20	20
316	A2VCP7;A2AU35;Q8BHL8	A2VCP7;A2AU35;Q8BHL8	Proteasome inhibitor PI31 subunit	Psmf1	tr|A2VCP7|A2VCP7_MOUSE Psmf1 protein (Fragment) OS=Mus musculus GN=Psmf1 PE=2 SV=1;tr|A2AU35|A2AU35_MOUSE Proteasome (Prosome, macropain) inhibitor subunit 1 OS=Mus musculus GN=Psmf1 PE=2 SV=1;sp|Q8BHL8|PSMF1_MOUSE Proteasome inhibitor PI31 subunit OS=Mus	41219000	24395000	13686000	39369000	53647000	30126000	154810000	78165000	84390000	39985000	3170700	1876500	1052800	3028400	4126700	2317400	11909000	6012700	6491600	66016000	77139000	86263000	46979000	73126000	78202000	66715000	139880000	163090000	6	6	6	30.7	30.7	30.7	26.073	0	6.6719	519810000	16	5	4	3	3	4
317	A2AU91;P70399;A2AU89;P70399-3;P70399-2;Q3V1P7;Q8C0U1;Q8BZ87;F6ZRL3;Q3UG49;Q8BLA0;A2AU90;F6S5E4;F6QNC8	A2AU91;P70399;A2AU89;P70399-3;P70399-2;Q3V1P7;Q8C0U1;Q8BZ87	Tumor suppressor p53-binding protein 1	Trp53bp1;Tp53bp1	tr|A2AU91|A2AU91_MOUSE Tumor suppressor p53-binding protein 1 OS=Mus musculus GN=Trp53bp1 PE=1 SV=1;sp|P70399|TP53B_MOUSE Tumor suppressor p53-binding protein 1 OS=Mus musculus GN=Tp53bp1 PE=1 SV=2;tr|A2AU89|A2AU89_MOUSE Tumor suppressor p53-binding protei	356020000	94424000	109080000	635710000	525700000	325400000	177480000	136690000	54625000	25158000	3708600	983590	1136300	6622000	5476100	3389600	1848700	1423800	569010	400030000	332230000	556890000	515510000	552480000	546770000	192300000	218720000	236190000	27	27	27	23	23	23	212.73	0	220.65	2415100000	101	24	17	15	24	23
318	A2AUD5;Q9CZ22;Q9CYZ2;Q3TAI4;V9GWU5	A2AUD5;Q9CZ22;Q9CYZ2;Q3TAI4;V9GWU5	Tumor protein D54	Tpd52l2	tr|A2AUD5|A2AUD5_MOUSE Tumor protein D54 OS=Mus musculus GN=Tpd52l2 PE=1 SV=1;tr|Q9CZ22|Q9CZ22_MOUSE Putative uncharacterized protein OS=Mus musculus GN=Tpd52l2 PE=2 SV=1;sp|Q9CYZ2|TPD54_MOUSE Tumor protein D54 OS=Mus musculus GN=Tpd52l2 PE=1 SV=1;tr|Q3TAI	554660000	236970000	69879000	549940000	370940000	173130000	791580000	498780000	177640000	213970000	34666000	14811000	4367400	34371000	23184000	10821000	49474000	31174000	11102000	814880000	729010000	620410000	458150000	803060000	526060000	1063900000	913500000	768000000	12	12	2	56.3	56.3	9.2	25.067	0	193.66	3423500000	113	10	10	5	8	8
319	B6ZHC9;A2AUK5;Q9Z2H5;B6ZHC4	B6ZHC9;A2AUK5;Q9Z2H5	Band 4.1-like protein 1	Epb4.1l1;Epb41l1	tr|B6ZHC9|B6ZHC9_MOUSE Erythrocyte protein band 4.1-like 1 OS=Mus musculus GN=Epb4.1l1 PE=2 SV=1;tr|A2AUK5|A2AUK5_MOUSE Band 4.1-like protein 1 OS=Mus musculus GN=Epb4.1l1 PE=1 SV=1;sp|Q9Z2H5|E41L1_MOUSE Band 4.1-like protein 1 OS=Mus musculus GN=Epb41l1 P	4035100000	1749100000	1298200000	5496000000	5216400000	2378300000	6298700000	4238100000	2854700000	633290000	76133000	33003000	24494000	103700000	98422000	44873000	118840000	79964000	53863000	5974800000	5565900000	5203900000	5633300000	5875500000	4444400000	6644500000	6839000000	6479800000	47	44	0	58.5	56.2	0	98.284	0	323.31	33565000000	748	44	39	37	42	40
320	A2AUK8;Q9Z2H5-2;A2AUK7;Q9Z2H5-3;A2AUK6	A2AUK8;Q9Z2H5-2;A2AUK7;Q9Z2H5-3;A2AUK6	Band 4.1-like protein 1	Epb4.1l1;Epb41l1	tr|A2AUK8|A2AUK8_MOUSE Band 4.1-like protein 1 OS=Mus musculus GN=Epb4.1l1 PE=1 SV=1;sp|Q9Z2H5-2|E41L1_MOUSE Isoform 2 of Band 4.1-like protein 1 OS=Mus musculus GN=Epb41l1;tr|A2AUK7|A2AUK7_MOUSE Band 4.1-like protein 1 OS=Mus musculus GN=Epb4.1l1 PE=1 SV=	13165000	5483300	4070400	5020900	5031500	3402000	33275000	28394000	11273000	2139500	258130	107520	79812	98448	98656	66705	652450	556740	221040	0	0	0	0	0	0	0	0	31131000	45	1	1	57.3	1.3	1.3	96.852	1	-2	109110000	3	42	38	35	40	38
321	A2AUM2;A2AUM1;A2AUM0;Q9QZ05-4;Q9QZ05-2;Q9QZ05-3;Q9QZ05;A2AUL9;Q9QZ05-5;Q9QZ05-6	A2AUM2;A2AUM1;A2AUM0;Q9QZ05-4;Q9QZ05-2;Q9QZ05-3;Q9QZ05	Eukaryotic translation initiation factor 2-alpha kinase 4	Eif2ak4	tr|A2AUM2|A2AUM2_MOUSE Eukaryotic translation initiation factor 2-alpha kinase 4 OS=Mus musculus GN=Eif2ak4 PE=4 SV=1;tr|A2AUM1|A2AUM1_MOUSE Eukaryotic translation initiation factor 2-alpha kinase 4 OS=Mus musculus GN=Eif2ak4 PE=4 SV=1;tr|A2AUM0|A2AUM0_MOU	1372400	4402400	1075300	15776000	6711500	1560400	8216700	10075000	10308000	734550	16943	54351	13275	194770	82858	19264	101440	124390	127260	0	17804000	0	20144000	0	0	0	12560000	23307000	3	3	3	2.3	2.3	2.3	173.12	0.0023098	2.4954	59498000	5	1	2	1	2	2
322	A2AUR3;Q60866-2;Q60866;A2AUR5	A2AUR3;Q60866-2;Q60866;A2AUR5	Phosphotriesterase-related protein	Pter	tr|A2AUR3|A2AUR3_MOUSE Phosphotriesterase-related protein (Fragment) OS=Mus musculus GN=Pter PE=4 SV=1;sp|Q60866-2|PTER_MOUSE Isoform 2 of Phosphotriesterase-related protein OS=Mus musculus GN=Pter;sp|Q60866|PTER_MOUSE Phosphotriesterase-related protein OS	5023200	8630800	2439700	31606000	20759000	8783600	9034400	3025600	2266100	7043800	386400	663910	187670	2431300	1596900	675660	694950	232740	174310	0	27379000	0	46914000	33974000	34443000	0	0	0	2	2	2	16.6	16.6	16.6	19.865	0	8.7074	91569000	10	1	2	1	2	2
323	A2AUX3;B7ZD29;Q3U2G7;Q3UHC7-4;Q3UHC7-3;Q3UHC7;F6RK07;Q3UHC7-2;F6Y0W2;D6RDE3	A2AUX3;B7ZD29;Q3U2G7;Q3UHC7-4;Q3UHC7-3;Q3UHC7;F6RK07;Q3UHC7-2	Disabled homolog 2-interacting protein	Dab2ip	tr|A2AUX3|A2AUX3_MOUSE Disabled homolog 2-interacting protein OS=Mus musculus GN=Dab2ip PE=4 SV=1;tr|B7ZD29|B7ZD29_MOUSE Disabled homolog 2-interacting protein OS=Mus musculus GN=Dab2ip PE=4 SV=1;tr|Q3U2G7|Q3U2G7_MOUSE Putative uncharacterized protein (Fra	371860000	106620000	87080000	436880000	321670000	184390000	536420000	328170000	177640000	33562000	4892900	1402900	1145800	5748500	4232500	2426200	7058200	4318000	2337400	432700000	355270000	380370000	347410000	311910000	339310000	475190000	486510000	486040000	36	32	4	39.6	37.3	2.7	125.11	0	81.134	2550700000	103	25	17	11	19	20
324	A2AUX8;Q9D0I6;F6R860;A2AUX9	A2AUX8;Q9D0I6;F6R860	WD repeat, SAM and U-box domain-containing protein 1	Wdsub1	tr|A2AUX8|A2AUX8_MOUSE WD repeat, SAM and U-box domain-containing protein 1 OS=Mus musculus GN=Wdsub1 PE=4 SV=1;sp|Q9D0I6|WSDU1_MOUSE WD repeat, SAM and U-box domain-containing protein 1 OS=Mus musculus GN=Wdsub1 PE=2 SV=1;tr|F6R860|F6R860_MOUSE WD repeat,	8453000	1046100	2673700	5517100	1430200	1303400	23522000	47293000	16091000	5366500	422650	52305	133690	275850	71512	65172	1176100	2364600	804540	22002000	0	0	18579000	0	0	48283000	26964000	27944000	4	4	4	14.2	14.2	14.2	45.592	0.00086543	3.5374	107330000	12	2	1	1	2	1
325	A2AUY4;Q69ZI8;B9EKB5;A0PJF0;Q3UGV3;Q8C0K4	A2AUY4;Q69ZI8;B9EKB5		Baz2b	tr|A2AUY4|A2AUY4_MOUSE Protein Baz2b OS=Mus musculus GN=Baz2b PE=4 SV=1;tr|Q69ZI8|Q69ZI8_MOUSE MKIAA1476 protein (Fragment) OS=Mus musculus GN=Baz2b PE=2 SV=1;tr|B9EKB5|B9EKB5_MOUSE Baz2b protein OS=Mus musculus GN=Baz2b PE=2 SV=1	7616700	5851400	0	7916600	18124000	9249500	7852900	6668400	1706500	618910	72540	55727	0	75396	172610	88091	74790	63509	16252	12721000	17879000	0	18160000	21127000	32975000	18502000	0	0	3	3	3	1.6	1.6	1.6	234	0.00044709	4.2515	64986000	6	3	3	0	2	3
326	A2AVJ7;Q99PL5;Q6ZPS0;Q99PL5-10;Q99PL5-9;Q99PL5-8;Q99PL5-7;Q99PL5-6;Q99PL5-5;Q99PL5-4;Q99PL5-3;Q99PL5-2;Q8C7E8;Q99PL5-12;Q99PL5-11;Q8CAB9;Q3ULC0;Q3T9Z9-4	A2AVJ7;Q99PL5;Q6ZPS0	Ribosome-binding protein 1	Rrbp1	tr|A2AVJ7|A2AVJ7_MOUSE Ribosome-binding protein 1 OS=Mus musculus GN=Rrbp1 PE=1 SV=1;sp|Q99PL5|RRBP1_MOUSE Ribosome-binding protein 1 OS=Mus musculus GN=Rrbp1 PE=1 SV=2;tr|Q6ZPS0|Q6ZPS0_MOUSE MKIAA1398 protein (Fragment) OS=Mus musculus GN=Rrbp1 PE=2 SV=1	995420000	461400000	221710000	1500900000	1150800000	567930000	952080000	591800000	389340000	58891000	8581200	3977600	1911300	12938000	9920700	4895900	8207600	5101700	3356400	1299000000	1221000000	1022100000	1217200000	1197200000	1016700000	915460000	858100000	881790000	36	36	36	32.2	32.2	32.2	158.39	0	275.03	6831300000	203	32	28	22	33	31
327	A2AVP4;Q148V5;Q148V4;P0C090;Q3UT88	A2AVP4;Q148V5;Q148V4;P0C090	Roquin-2	Rc3h2	tr|A2AVP4|A2AVP4_MOUSE Roquin-2 OS=Mus musculus GN=Rc3h2 PE=4 SV=1;tr|Q148V5|Q148V5_MOUSE Ring finger and CCCH-type zinc finger domains 2 OS=Mus musculus GN=Rc3h2 PE=2 SV=1;tr|Q148V4|Q148V4_MOUSE Ring finger and CCCH-type zinc finger domains 2 OS=Mus muscu	31842000	10252000	2267200	23699000	43600000	8100000	49285000	23473000	0	3105100	513590	165350	36567	382240	703220	130640	794910	378600	0	33414000	0	0	42840000	59711000	35044000	44764000	38761000	0	5	5	3	6.5	6.5	3.9	124.71	0	9.6611	192520000	8	4	2	1	3	3
328	Q9CSK1;A2AVR1;A2AVQ9;Q8C2G3;Q8R3H9;Q3UZC4	Q9CSK1;A2AVR1;A2AVQ9;Q8C2G3;Q8R3H9;Q3UZC4	Tetratricopeptide repeat protein 4	Ttc4	tr|Q9CSK1|Q9CSK1_MOUSE Putative uncharacterized protein (Fragment) OS=Mus musculus GN=Ttc4 PE=2 SV=1;tr|A2AVR1|A2AVR1_MOUSE Tetratricopeptide repeat protein 4 (Fragment) OS=Mus musculus GN=Ttc4 PE=4 SV=1;tr|A2AVQ9|A2AVQ9_MOUSE Tetratricopeptide repeat prot	10661000	7736500	1463500	15583000	53470000	0	7192700	0	7312200	7955200	820060	595120	112580	1198700	4113000	0	553290	0	562480	0	24022000	0	0	0	0	0	0	0	3	3	3	14.8	14.8	14.8	24.277	0	5.2742	103420000	4	2	2	2	1	2
329	A2AW05;Q05DR5;Q08943;Q08943-2	A2AW05;Q05DR5;Q08943;Q08943-2	FACT complex subunit SSRP1	Ssrp1	tr|A2AW05|A2AW05_MOUSE FACT complex subunit SSRP1 (Fragment) OS=Mus musculus GN=Ssrp1 PE=1 SV=1;tr|Q05DR5|Q05DR5_MOUSE Ssrp1 protein (Fragment) OS=Mus musculus GN=Ssrp1 PE=2 SV=1;sp|Q08943|SSRP1_MOUSE FACT complex subunit SSRP1 OS=Mus musculus GN=Ssrp1 PE=	729550000	410090000	235010000	2001000000	1402700000	733670000	252010000	170550000	86087000	162720000	19718000	11084000	6351600	54081000	37911000	19829000	6811100	4609400	2326700	1215900000	1189100000	1362700000	1780000000	1804100000	1736200000	330380000	318870000	505780000	22	22	22	42.5	42.5	42.5	71.527	0	250.76	6020700000	146	20	18	13	22	21
330	A2AW73;Q76KF0-3;Q76KF0-2;Q76KF0-4;Q76KF0-5;Q76KF0-6;Q76KF0;Q8BKG8	A2AW73;Q76KF0-3;Q76KF0-2;Q76KF0-4;Q76KF0-5;Q76KF0-6;Q76KF0;Q8BKG8	Semaphorin-6D	Sema6d	tr|A2AW73|A2AW73_MOUSE Semaphorin-6D OS=Mus musculus GN=Sema6d PE=4 SV=1;sp|Q76KF0-3|SEM6D_MOUSE Isoform 2 of Semaphorin-6D OS=Mus musculus GN=Sema6d;sp|Q76KF0-2|SEM6D_MOUSE Isoform 1 of Semaphorin-6D OS=Mus musculus GN=Sema6d;sp|Q76KF0-4|SEM6D_MOUSE Isofo	9159900	4799000	5416600	12857000	10171000	5654200	5141200	8856500	6516500	1182300	157930	82741	93389	221680	175360	97486	88641	152700	112350	12300000	15842000	26286000	17263000	14263000	15992000	0	21671000	18746000	3	3	3	4.8	4.8	4.8	119.42	0	6.1986	68572000	10	3	2	2	2	2
331	B2RRC5;A2AWA9;A2AWA9-2;A2AWA7;A2AWA9-3;A2AWB0	B2RRC5;A2AWA9;A2AWA9-2;A2AWA7	Rab GTPase-activating protein 1	Rabgap1	tr|B2RRC5|B2RRC5_MOUSE RAB GTPase activating protein 1 OS=Mus musculus GN=Rabgap1 PE=2 SV=1;sp|A2AWA9|RBGP1_MOUSE Rab GTPase-activating protein 1 OS=Mus musculus GN=Rabgap1 PE=1 SV=1;sp|A2AWA9-2|RBGP1_MOUSE Isoform 2 of Rab GTPase-activating protein 1 OS=M	306260000	150160000	39071000	260650000	245840000	158980000	447250000	448580000	259350000	35093000	4640400	2275100	591980	3949300	3724900	2408800	6776500	6796700	3929600	375580000	490770000	317520000	419870000	346000000	340520000	389940000	465010000	602740000	26	26	22	25.9	25.9	22	120.8	0	65.052	2316200000	115	24	18	8	16	18
332	A2AWF8;A2AWF9;E9Q4S7;Q64455;Q61373;Q3V2L7	A2AWF8;A2AWF9;E9Q4S7;Q64455;Q61373	Protein-tyrosine-phosphatase;Receptor-type tyrosine-protein phosphatase eta	Ptprj	tr|A2AWF8|A2AWF8_MOUSE Receptor-type tyrosine-protein phosphatase eta OS=Mus musculus GN=Ptprj PE=4 SV=1;tr|A2AWF9|A2AWF9_MOUSE Receptor-type tyrosine-protein phosphatase eta OS=Mus musculus GN=Ptprj PE=4 SV=1;tr|E9Q4S7|E9Q4S7_MOUSE Receptor-type tyrosine-	69287000	56869000	41716000	88245000	117980000	54536000	210720000	226530000	89568000	17062000	1237300	1015500	744930	1575800	2106700	973860	3762800	4045300	1599400	217710000	180560000	211870000	89145000	135350000	121480000	230090000	242800000	239790000	12	12	12	14.5	14.5	14.5	128.71	0	30.654	955450000	48	6	10	9	10	8
333	A2AWI7	A2AWI7		Sh3glb2	tr|A2AWI7|A2AWI7_MOUSE Endophilin-B2 OS=Mus musculus GN=Sh3glb2 PE=4 SV=1	2642600000	1298100000	739930000	2454000000	2324000000	1515000000	6772300000	4344500000	2458100000	1067300000	114890000	56439000	32171000	106690000	101040000	65870000	294450000	188890000	106870000	3266200000	3659200000	3153000000	2324500000	2358500000	2250900000	6099400000	5886100000	6254200000	20	20	1	53.2	53.2	4.2	44.907	0	323.31	24548000000	424	17	18	17	20	19
334	A2AWI9;Q8R3V5-3	A2AWI9;Q8R3V5-3	Endophilin-B2	Sh3glb2	tr|A2AWI9|A2AWI9_MOUSE Endophilin-B2 OS=Mus musculus GN=Sh3glb2 PE=4 SV=1;sp|Q8R3V5-3|SHLB2_MOUSE Isoform 3 of Endophilin-B2 OS=Mus musculus GN=Sh3glb2	6757100	5812600	3245500	10769000	8255100	5996800	19614000	16638000	10527000	3982500	307140	264210	147520	489520	375230	272580	891530	756270	478490	0	0	0	0	0	0	0	0	19600000	19	1	1	50.8	4.3	4.3	41.81	0	5.7373	87615000	5	17	17	17	19	18
335	H7BX50;E9QLG3;A2AWL7-2;A2AWL7-3;A2AWL7;A2AWL7-4;Q3ULI0	H7BX50;E9QLG3;A2AWL7-2;A2AWL7-3;A2AWL7;A2AWL7-4	MAX gene-associated protein	Mga	tr|H7BX50|H7BX50_MOUSE MAX gene-associated protein OS=Mus musculus GN=Mga PE=4 SV=1;tr|E9QLG3|E9QLG3_MOUSE MAX gene-associated protein OS=Mus musculus GN=Mga PE=4 SV=1;sp|A2AWL7-2|MGAP_MOUSE Isoform 2 of MAX gene-associated protein OS=Mus musculus GN=Mga;s	2184800	1512200	0	631730	11553000	5417700	681540	1363000	514540	137910	12629	8741.2	0	3651.6	66778	31316	3939.6	7878.7	2974.2	3217000	4097500	0	0	8855900	5373800	0	0	0	3	3	3	1.3	1.3	1.3	312.13	0.0013972	2.9666	23858000	5	1	1	0	1	2
336	A2AWN8;P59326;Q3TH60;Q3U8D6;Q8BUI8	A2AWN8;P59326;Q3TH60	YTH domain-containing family protein 1	Ythdf1	tr|A2AWN8|A2AWN8_MOUSE YTH domain family 1, isoform CRA_a OS=Mus musculus GN=Ythdf1 PE=4 SV=1;sp|P59326|YTHD1_MOUSE YTH domain-containing family protein 1 OS=Mus musculus GN=Ythdf1 PE=2 SV=1;tr|Q3TH60|Q3TH60_MOUSE Putative uncharacterized protein (Fragment	295510000	69289000	86883000	187140000	208940000	163860000	49725000	44804000	39120000	49794000	12848000	3012600	3777500	8136500	9084300	7124300	2161900	1948000	1700900	255150000	183130000	230340000	234420000	216160000	245800000	67335000	102020000	135110000	12	12	6	27.6	27.6	17.9	63.899	0	76.228	1145300000	33	10	6	6	9	11
337	A2AWP6;A2AWP8-3;A2AWP8-2;A2AWP8-4;A2AWP8;A2AWP8-5;F6S3V7;A2AWP4;Q922V5;A4FUT6;F6ZH54	A2AWP6;A2AWP8-3;A2AWP8-2;A2AWP8-4;A2AWP8;A2AWP8-5;F6S3V7	Rho guanine nucleotide exchange factor 10-like protein	Arhgef10l	tr|A2AWP6|A2AWP6_MOUSE Rho guanine nucleotide exchange factor 10-like protein OS=Mus musculus GN=Arhgef10l PE=4 SV=1;sp|A2AWP8-3|ARGAL_MOUSE Isoform 3 of Rho guanine nucleotide exchange factor 10-like protein OS=Mus musculus GN=Arhgef10l;sp|A2AWP8-2|ARGAL_	101920000	51746000	25184000	206810000	143800000	55369000	224510000	146690000	75374000	19835000	1960000	995110	484310	3977100	2765400	1064800	4317600	2821000	1449500	167480000	158060000	204980000	218930000	215370000	176100000	308590000	289110000	275760000	19	19	18	24.4	24.4	23.7	113.98	0	95.531	1031400000	62	15	12	7	15	12
338	D7RXL9;A2AWR2;A2AWR3;F6Z6G4;Q8R0W2;U5PZE9;Q14BN5;D7RXM0	D7RXL9;A2AWR2;A2AWR3;F6Z6G4;Q8R0W2;U5PZE9;Q14BN5;D7RXM0		Gpr155	tr|D7RXL9|D7RXL9_MOUSE GPR155 variant 2 OS=Mus musculus GN=Gpr155 PE=2 SV=1;tr|A2AWR2|A2AWR2_MOUSE GPR155 variant 5 OS=Mus musculus GN=Gpr155 PE=2 SV=1;tr|A2AWR3|A2AWR3_MOUSE GPR155 variant 1 OS=Mus musculus GN=Gpr155 PE=2 SV=1;tr|F6Z6G4|F6Z6G4_MOUSE Prote	789170	919210	281230	7153200	12433000	2759600	1199800	2837100	1126200	1017200	27213	31697	9697.7	246660	428740	95159	41374	97832	38835	0	0	0	6096200	20124000	0	0	4967400	0	2	2	2	2.6	2.6	2.6	86.789	0.0023045	2.4659	29499000	4	1	1	1	2	2
339	Q9DBH1;A2AWT7;A2AWT6;P25976-2	Q9DBH1;A2AWT7;A2AWT6;P25976-2	Nucleolar transcription factor 1	Ubtf	tr|Q9DBH1|Q9DBH1_MOUSE Putative uncharacterized protein OS=Mus musculus GN=Ubtf PE=2 SV=1;tr|A2AWT7|A2AWT7_MOUSE Nucleolar transcription factor 1 OS=Mus musculus GN=Ubtf PE=4 SV=1;tr|A2AWT6|A2AWT6_MOUSE Nucleolar transcription factor 1 OS=Mus musculus GN=U	615080000	189390000	96205000	1544900000	1471000000	626380000	150790000	176760000	65348000	96782000	12060000	3713400	1886400	30292000	28844000	12282000	2956600	3465900	1281300	912530000	728820000	780680000	1492500000	1467000000	1117200000	231230000	304040000	181390000	28	28	1	38	38	1.1	88.356	0	126.12	4935900000	157	23	20	12	26	25
340	A2BDX0;Q6ZQ47;Q3UYC8;Q5BL11;Q5RKY4;Q9Z103;Q8BNY2	A2BDX0;Q6ZQ47;Q3UYC8;Q5BL11;Q5RKY4;Q9Z103	Activity-dependent neuroprotector homeobox protein	Adnp	tr|A2BDX0|A2BDX0_MOUSE Activity-dependent neuroprotector homeobox protein OS=Mus musculus GN=Adnp PE=1 SV=1;tr|Q6ZQ47|Q6ZQ47_MOUSE MKIAA0784 protein (Fragment) OS=Mus musculus GN=Adnp PE=2 SV=1;tr|Q3UYC8|Q3UYC8_MOUSE Putative uncharacterized protein OS=Mus	311010000	137030000	63848000	500510000	512490000	285870000	84301000	52210000	49649000	27355000	4260400	1877200	874630	6856300	7020400	3916000	1154800	715200	680120	414340000	423670000	387960000	688660000	582390000	555630000	106970000	90321000	89715000	31	31	31	32.7	32.7	32.7	124.31	0	66.562	1996900000	77	22	21	14	25	24
341	A2BDX3;Q14BE0	A2BDX3	Adenylyltransferase and sulfurtransferase MOCS3;Molybdopterin-synthase adenylyltransferase;Molybdopterin-synthase sulfurtransferase	Mocs3	sp|A2BDX3|MOCS3_MOUSE Adenylyltransferase and sulfurtransferase MOCS3 OS=Mus musculus GN=Mocs3 PE=2 SV=1	957170000	81429000	75511000	248810000	214130000	655050000	354240000	222480000	102260000	100380000	33006000	2807900	2603800	8579700	7383700	22588000	12215000	7671700	3526200	548940000	545050000	848770000	563010000	483210000	537090000	665690000	633890000	518090000	19	19	19	55	55	55	49.374	0	83.606	2911100000	87	14	14	10	17	16
342	A2BE28-2;A2BE28	A2BE28-2;A2BE28	Ribosomal biogenesis protein LAS1L	Las1l	sp|A2BE28-2|LAS1L_MOUSE Isoform 2 of Ribosomal biogenesis protein LAS1L OS=Mus musculus GN=Las1l;sp|A2BE28|LAS1L_MOUSE Ribosomal biogenesis protein LAS1L OS=Mus musculus GN=Las1l PE=1 SV=1	37664000	23483000	20948000	129090000	95593000	66505000	36834000	19493000	9385500	10209000	875910	546110	487170	3002100	2223100	1546600	856610	453330	218270	48110000	90553000	95717000	152780000	100020000	111270000	44344000	50059000	35834000	11	11	11	17.8	17.8	17.8	87.577	0	34.78	439000000	31	8	6	5	10	9
343	A2BE91;Q5U4F6	A2BE91;Q5U4F6	WD repeat-containing protein 34	Wdr34	tr|A2BE91|A2BE91_MOUSE WD repeat domain 34 OS=Mus musculus GN=Wdr34 PE=4 SV=1;sp|Q5U4F6|WDR34_MOUSE WD repeat-containing protein 34 OS=Mus musculus GN=Wdr34 PE=2 SV=2	33465000	14705000	2329700	10770000	10804000	12874000	45453000	29226000	10139000	7716600	1521100	668390	105890	489570	491100	585190	2066000	1328400	460880	28487000	40692000	0	21517000	16704000	22056000	46545000	43392000	55023000	6	6	6	16	16	16	58.173	0	12.397	169770000	14	5	4	1	3	3
344	A2BE93;Q5U445;Q3T9S3;Q9EQU5;A2BE92;Q9EQU5-2;Q9EQU5-3;Q9CRT3	A2BE93;Q5U445;Q3T9S3;Q9EQU5;A2BE92;Q9EQU5-2;Q9EQU5-3	Protein SET	Set;BC085271	tr|A2BE93|A2BE93_MOUSE Protein SET (Fragment) OS=Mus musculus GN=Set PE=1 SV=1;tr|Q5U445|Q5U445_MOUSE cDNA sequence BC085271 OS=Mus musculus GN=BC085271 PE=2 SV=1;tr|Q3T9S3|Q3T9S3_MOUSE SET translocation OS=Mus musculus GN=Set PE=2 SV=1;sp|Q9EQU5|SET_MOUSE	1014000000	369530000	274270000	870900000	985260000	553680000	117320000	131570000	74089000	365890000	84503000	30794000	22856000	72575000	82105000	46140000	9776800	10964000	6174100	1254500000	862260000	1160400000	655040000	820680000	700120000	144560000	220330000	198590000	9	9	9	54.4	54.4	54.4	24.923	0	48.354	4390600000	63	6	6	7	7	6
345	Q6GSP7;A2BG76;I7HIP8;A2BG75;A2BG77;P97863-3;P97863-2;P97863;Q8C434;Q8BN68;Q3UFE1;A2ADI3;J3JS90	Q6GSP7;A2BG76;I7HIP8;A2BG75;A2BG77;P97863-3;P97863-2;P97863;Q8C434;Q8BN68;Q3UFE1;A2ADI3;J3JS90	Nuclear factor 1;Nuclear factor 1 B-type	Nfib	tr|Q6GSP7|Q6GSP7_MOUSE Nuclear factor 1 OS=Mus musculus GN=Nfib PE=2 SV=1;tr|A2BG76|A2BG76_MOUSE Nuclear factor 1 OS=Mus musculus GN=Nfib PE=1 SV=1;tr|I7HIP8|I7HIP8_MOUSE Nuclear factor 1 OS=Mus musculus GN=Nfib PE=1 SV=1;tr|A2BG75|A2BG75_MOUSE Nuclear fac	271440000	115500000	52278000	720540000	766590000	373230000	92052000	57492000	23972000	130160000	14286000	6079100	2751500	37923000	40347000	19644000	4844800	3025900	1261700	396640000	400340000	238770000	727990000	1152900000	967460000	96422000	100110000	90555000	14	11	11	50.2	46.2	46.2	47.471	0	73.095	2473100000	47	10	10	7	14	12
346	A2BGN7;Q9D8X0	A2BGN7;Q9D8X0	Protein MANBAL	Manbal	tr|A2BGN7|A2BGN7_MOUSE Protein MANBAL OS=Mus musculus GN=Manbal PE=4 SV=1;sp|Q9D8X0|MANBL_MOUSE Protein MANBAL OS=Mus musculus GN=Manbal PE=2 SV=2	23071000	7494900	19956000	27517000	45114000	72303000	10207000	16661000	13272000	47119000	4614300	1499000	3991100	5503500	9022800	14461000	2041300	3332300	2654400	23530000	25766000	63980000	0	44537000	122560000	0	23909000	0	2	2	2	40	40	40	9.3679	0	58.261	235600000	12	2	2	2	1	2
347	E9QAQ7;A2BH40;A2BH40-3;A2BH40-4;A2BH40-2;Q8C846;Q8R024	E9QAQ7;A2BH40;A2BH40-3;A2BH40-4;A2BH40-2	AT-rich interactive domain-containing protein 1A	Arid1a	tr|E9QAQ7|E9QAQ7_MOUSE AT-rich interactive domain-containing protein 1A OS=Mus musculus GN=Arid1a PE=1 SV=1;sp|A2BH40|ARI1A_MOUSE AT-rich interactive domain-containing protein 1A OS=Mus musculus GN=Arid1a PE=1 SV=1;sp|A2BH40-3|ARI1A_MOUSE Isoform 3 of AT-r	155290000	83529000	57310000	234720000	235320000	164710000	35496000	31318000	108170000	12287000	1725400	928100	636770	2608000	2614700	1830100	394400	347980	1201900	236550000	259390000	283820000	332010000	364370000	422730000	60892000	62945000	84265000	26	23	22	16.2	14.5	14.2	242.67	0	76.057	1105900000	76	20	21	13	21	22
348	A2BI12	A2BI12		Psip1	tr|A2BI12|A2BI12_MOUSE PC4 and SFRS1-interacting protein OS=Mus musculus GN=Psip1 PE=1 SV=1	45548000	21427000	0	0	0	83214000	0	13179000	7325800	8983900	2397300	1127800	0	0	0	4379700	0	693650	385570	0	0	0	0	0	0	0	0	13640000	18	1	1	52.6	4	4	36.968	0.00044856	4.3335	170690000	2	17	17	13	17	16
349	A2BI30;F6ZGR6;D3YZ21;Q8BXF0	A2BI30;F6ZGR6;D3YZ21		RP24-297H17.3;D430041D05Rik	tr|A2BI30|A2BI30_MOUSE Novel protein (Fragment) OS=Mus musculus GN=RP24-297H17.3 PE=4 SV=1;tr|F6ZGR6|F6ZGR6_MOUSE Protein D430041D05Rik (Fragment) OS=Mus musculus GN=D430041D05Rik PE=1 SV=1;tr|D3YZ21|D3YZ21_MOUSE Protein D430041D05Rik OS=Mus musculus GN=D4	2434400000	1556900000	847280000	4128200000	2815300000	2000800000	2755100000	1974300000	1118200000	272640000	33811000	21623000	11768000	57335000	39102000	27790000	38265000	27420000	15531000	5420000000	4865600000	6112300000	3810200000	3398800000	2922900000	4956400000	6157100000	6586600000	21	21	21	19.9	19.9	19.9	181.02	0	169.11	19630000000	117	16	11	13	13	10
350	Q920G6;A2BI31;O55186	Q920G6;A2BI31;O55186	CD59A glycoprotein	CD59A;Cd59a	tr|Q920G6|Q920G6_MOUSE CD59A OS=Mus musculus GN=CD59A PE=4 SV=1;tr|A2BI31|A2BI31_MOUSE CD59a antigen OS=Mus musculus GN=Cd59a PE=2 SV=1;sp|O55186|CD59A_MOUSE CD59A glycoprotein OS=Mus musculus GN=Cd59a PE=2 SV=1	51719000	23960000	9060700	77639000	119140000	66127000	42038000	39795000	9388400	109720000	12930000	5990100	2265200	19410000	29785000	16532000	10509000	9948800	2347100	70353000	61144000	49485000	99780000	120670000	161380000	39524000	47140000	0	3	3	3	22.8	22.8	22.8	13.674	0	10.981	438870000	16	2	2	2	3	3
351	A2CG20;O35449;Q14C00	A2CG20;O35449;Q14C00	Proline-rich transmembrane protein 1	Prrt1	tr|A2CG20|A2CG20_MOUSE Proline-rich transmembrane protein 1 OS=Mus musculus GN=Prrt1 PE=4 SV=1;sp|O35449|PRRT1_MOUSE Proline-rich transmembrane protein 1 OS=Mus musculus GN=Prrt1 PE=1 SV=1;tr|Q14C00|Q14C00_MOUSE Prrt1 protein OS=Mus musculus GN=Prrt1 PE=2	2382500	34503000	19162000	1580900	0	2130300	35734000	24899000	51103000	28583000	397080	5750500	3193700	263490	0	355050	5955700	4149900	8517200	0	0	0	0	0	0	46197000	42653000	140470000	2	2	2	8.5	8.5	8.5	31.389	0	34.734	171500000	11	1	1	1	1	0
352	F6QYT9;A2CG49-2;A2CG49;A2CG49-7;A2CG49-9;A2CG49-8;B1B1A7;D3Z560;D3Z559;A2CG49-5;D3Z534;D3Z532;D3Z535;D3Z4R2;A2CG49-4;A2CG49-6	F6QYT9;A2CG49-2;A2CG49;A2CG49-7;A2CG49-9;A2CG49-8;B1B1A7;D3Z560;D3Z559;A2CG49-5	Kalirin	Kalrn	tr|F6QYT9|F6QYT9_MOUSE Kalirin (Fragment) OS=Mus musculus GN=Kalrn PE=1 SV=1;sp|A2CG49-2|KALRN_MOUSE Isoform 2 of Kalirin OS=Mus musculus GN=Kalrn;sp|A2CG49|KALRN_MOUSE Kalirin OS=Mus musculus GN=Kalrn PE=1 SV=1;sp|A2CG49-7|KALRN_MOUSE Isoform 7 of Kalirin	59016000	36677000	10614000	30814000	21831000	0	158380000	84817000	58071000	3218300	412700	256480	74222	215480	152660	0	1107600	593120	406090	77818000	50447000	63238000	20188000	30629000	0	165670000	152780000	135220000	24	13	12	10	5.7	5.7	270.65	0	18.668	460220000	28	15	13	10	14	10
353	A2CG63-2;A2CG63;Q8BV50;Z4YL44;Z4YMH1;Q8BXV6;Q3TR72;F6R6U0;Q8BYB0;Q8BWM4	A2CG63-2;A2CG63;Q8BV50;Z4YL44;Z4YMH1	AT-rich interactive domain-containing protein 4B	Arid4b	sp|A2CG63-2|ARI4B_MOUSE Isoform 2 of AT-rich interactive domain-containing protein 4B OS=Mus musculus GN=Arid4b;sp|A2CG63|ARI4B_MOUSE AT-rich interactive domain-containing protein 4B OS=Mus musculus GN=Arid4b PE=1 SV=1;tr|Q8BV50|Q8BV50_MOUSE Putative uncha	13686000	3296300	1369500	33589000	37687000	15432000	1123800	5476400	0	1717800	210550	50712	21070	516750	579800	237410	17289	84252	0	21991000	21855000	0	29765000	28656000	40131000	0	0	0	6	6	5	6.9	6.9	6.1	137.32	0.00044412	4.1221	111660000	8	4	3	1	5	6
354	Q3U4G9;A2CG76;Q9Z148-2;Q9Z148-3;Q9Z148;Q8BP38;G3UYH7;A2CG77;H3BIW5	Q3U4G9;A2CG76;Q9Z148-2;Q9Z148-3;Q9Z148;Q8BP38	Histone-lysine N-methyltransferase EHMT2	Ehmt2	tr|Q3U4G9|Q3U4G9_MOUSE Putative uncharacterized protein OS=Mus musculus GN=Ehmt2 PE=2 SV=1;tr|A2CG76|A2CG76_MOUSE Histone-lysine N-methyltransferase EHMT2 OS=Mus musculus GN=Ehmt2 PE=4 SV=1;sp|Q9Z148-2|EHMT2_MOUSE Isoform 2 of Histone-lysine N-methyltransf	77087000	29631000	37231000	62414000	54698000	47319000	19543000	16332000	7936200	5869800	1284800	493840	620510	1040200	911630	788660	325710	272200	132270	38077000	73871000	0	57944000	54252000	75206000	37343000	0	54029000	7	7	7	6.9	6.9	6.9	134.72	0	12.82	352190000	14	6	3	1	7	6
355	A2RRI8;Q8CF93;Q8CF93-2;Q3UFE4;O08912	A2RRI8;Q8CF93;Q8CF93-2	Polypeptide N-acetylgalactosaminyltransferase;Polypeptide N-acetylgalactosaminyltransferase 13	Galnt13	tr|A2RRI8|A2RRI8_MOUSE Galnt13 protein OS=Mus musculus GN=Galnt13 PE=2 SV=1;sp|Q8CF93|GLT13_MOUSE Polypeptide N-acetylgalactosaminyltransferase 13 OS=Mus musculus GN=Galnt13 PE=2 SV=1;sp|Q8CF93-2|GLT13_MOUSE Isoform 2 of Polypeptide N-acetylgalactosaminylt	35060000	3046700	2181600	42138000	37793000	18085000	16128000	11060000	6181200	5364800	1095600	95210	68176	1316800	1181000	565150	503990	345640	193160	42792000	33661000	0	55271000	46770000	53897000	23126000	0	0	7	7	7	13.1	13.1	13.1	63.982	0	10.12	171670000	17	5	3	2	5	5
356	A2RRJ6;Q80SY4;F6ZBL2;Q3TSS1;F6YFW9;Q3UTL6	A2RRJ6;Q80SY4;F6ZBL2	E3 ubiquitin-protein ligase MIB1	Mib1	tr|A2RRJ6|A2RRJ6_MOUSE Mib1 protein OS=Mus musculus GN=Mib1 PE=2 SV=1;sp|Q80SY4|MIB1_MOUSE E3 ubiquitin-protein ligase MIB1 OS=Mus musculus GN=Mib1 PE=1 SV=1;tr|F6ZBL2|F6ZBL2_MOUSE E3 ubiquitin-protein ligase MIB1 (Fragment) OS=Mus musculus GN=Mib1 PE=4 SV	44767000	27811000	3039700	41532000	87869000	23719000	133320000	110660000	22721000	8691800	785390	487900	53328	728640	1541600	416120	2339000	1941300	398610	58500000	100470000	0	40399000	124290000	65976000	107060000	104050000	72931000	7	7	7	8.3	8.3	8.3	110.09	0	7.6831	495430000	29	4	3	1	5	5
357	A2RRK3;O54988-2;O54988;Q3TRK8;G3X8V6;B9EHD2;O70458-2;O70458	A2RRK3;O54988-2;O54988	STE20-like serine/threonine-protein kinase	Slk	tr|A2RRK3|A2RRK3_MOUSE Slk protein OS=Mus musculus GN=Slk PE=2 SV=1;sp|O54988-2|SLK_MOUSE Isoform 2 of STE20-like serine/threonine-protein kinase OS=Mus musculus GN=Slk;sp|O54988|SLK_MOUSE STE20-like serine/threonine-protein kinase OS=Mus musculus GN=Slk P	625560000	228250000	248490000	464030000	311630000	421620000	1140100000	724810000	258010000	63178000	8936600	3260700	3549900	6629000	4451900	6023100	16286000	10354000	3685900	628330000	539570000	982440000	359460000	371140000	523880000	798300000	846920000	707400000	25	25	23	24	24	22.4	137.71	0	140.58	4422500000	105	22	19	11	20	14
358	A2RRR3;Q8R337	A2RRR3		Clasp2	tr|A2RRR3|A2RRR3_MOUSE Clasp2 protein OS=Mus musculus GN=Clasp2 PE=2 SV=1	0	0	0	743850000	0	875040	0	0	0	10639000	0	0	0	10626000	0	12501	0	0	0	0	0	0	0	0	4035900	0	0	0	49	1	1	53	0.8	0.8	119.47	1	-2	744720000	1	43	39	34	45	43
359	A2RS02;Q3U9F6	A2RS02;Q3U9F6	RING finger protein 166	Rnf166	tr|A2RS02|A2RS02_MOUSE MCG14177, isoform CRA_b OS=Mus musculus GN=Rnf166 PE=2 SV=1;sp|Q3U9F6|RN166_MOUSE RING finger protein 166 OS=Mus musculus GN=Rnf166 PE=2 SV=1	6670600	0	0	0	0	0	0	0	0	476470	476470	0	0	0	0	0	0	0	0	7748100	0	0	0	0	0	0	0	0	1	1	1	7.6	7.6	7.6	26.064	0.0097439	1.4842	6670600	1	1	0	0	0	0
360	A2RS22;Q9WUM3;D3YUG6	A2RS22;Q9WUM3	Coronin;Coronin-1B	Coro1b	tr|A2RS22|A2RS22_MOUSE Coronin OS=Mus musculus GN=Coro1b PE=2 SV=1;sp|Q9WUM3|COR1B_MOUSE Coronin-1B OS=Mus musculus GN=Coro1b PE=1 SV=1	1483300000	789050000	489650000	1019500000	1042100000	759070000	3197300000	2438100000	1198400000	539850000	64490000	34307000	21289000	44325000	45310000	33003000	139010000	106010000	52105000	2241900000	1752200000	1664900000	1445000000	1697800000	1936000000	3119300000	2997600000	3007500000	18	18	18	44.6	44.6	44.6	53.912	0	161.52	12417000000	244	17	15	12	17	17
361	A2RS23;Q11136;G3UXC5	A2RS23;Q11136	Xaa-Pro dipeptidase	Pepd	tr|A2RS23|A2RS23_MOUSE Peptidase D OS=Mus musculus GN=Pepd PE=2 SV=1;sp|Q11136|PEPD_MOUSE Xaa-Pro dipeptidase OS=Mus musculus GN=Pepd PE=2 SV=3	399030000	238830000	144230000	492900000	425290000	225880000	684590000	404900000	242620000	116370000	14251000	8529500	5151200	17604000	15189000	8067300	24449000	14461000	8664900	599480000	728220000	639500000	639250000	603630000	651210000	917340000	720790000	818750000	16	16	16	42.8	42.8	42.8	55.028	0	100.36	3258300000	112	14	12	10	12	14
362	Q3USI1;Q3TVS7;O88185;A2RS43;E9Q2S0	Q3USI1;Q3TVS7;O88185;A2RS43;E9Q2S0		Pcdh7	tr|Q3USI1|Q3USI1_MOUSE Putative uncharacterized protein OS=Mus musculus GN=Pcdh7 PE=2 SV=1;tr|Q3TVS7|Q3TVS7_MOUSE Putative uncharacterized protein OS=Mus musculus GN=Pcdh7 PE=2 SV=1;tr|O88185|O88185_MOUSE BH-protocadherin-a OS=Mus musculus GN=Pcdh7 PE=2 SV	17775000	5027200	1057400	18523000	13051000	15738000	9717400	8014300	9843600	1936200	348520	98573	20733	363200	255890	308580	190540	157140	193010	27285000	0	0	23001000	19313000	32113000	16895000	16540000	28915000	4	4	4	5.2	5.2	5.2	116.23	0	7.7922	98746000	11	4	2	1	3	3
363	Q8C1Z9;F6V6T4;A2RS53;Q9R0Q3;Q3U9H7;Q3THL1;Q8BPI2	Q8C1Z9;F6V6T4;A2RS53;Q9R0Q3;Q3U9H7;Q3THL1	Transmembrane emp24 domain-containing protein 2	Tmed2	tr|Q8C1Z9|Q8C1Z9_MOUSE Putative uncharacterized protein OS=Mus musculus PE=2 SV=1;tr|F6V6T4|F6V6T4_MOUSE Transmembrane emp24 domain-containing protein 2 (Fragment) OS=Mus musculus GN=Tmed2 PE=3 SV=1;tr|A2RS53|A2RS53_MOUSE Transmembrane emp24 domain traffic	515710000	121850000	136250000	749610000	642410000	324250000	320770000	261440000	66583000	313890000	51571000	12185000	13625000	74961000	64241000	32425000	32077000	26144000	6658300	612660000	490160000	541850000	782220000	589870000	543380000	352240000	432040000	139940000	7	7	7	47.2	47.2	47.2	18.262	0	33.291	3138900000	81	7	4	4	6	5
364	A2RS58;P47941;Q8R5B8	A2RS58;P47941	Crk-like protein	Crkl	tr|A2RS58|A2RS58_MOUSE V-crk sarcoma virus CT10 oncogene homolog (Avian)-like OS=Mus musculus GN=Crkl PE=2 SV=1;sp|P47941|CRKL_MOUSE Crk-like protein OS=Mus musculus GN=Crkl PE=1 SV=2	357950000	136560000	93348000	337110000	308640000	131200000	403800000	501100000	172760000	128550000	18840000	7187100	4913100	17743000	16244000	6905200	21252000	26374000	9092600	595620000	455140000	416980000	401680000	441540000	332940000	512820000	642760000	538570000	11	11	11	47.9	47.9	47.9	33.83	0	57.54	2442500000	102	8	10	8	11	10
365	A2RS63;B7ZNF1;Q8R3V6;Q3TRP3;F2Z3X3;Q8R1H6	A2RS63;B7ZNF1;Q8R3V6;Q3TRP3;F2Z3X3	CUE domain-containing protein 1	Cuedc1	tr|A2RS63|A2RS63_MOUSE CUE domain containing 1 OS=Mus musculus GN=Cuedc1 PE=2 SV=1;tr|B7ZNF1|B7ZNF1_MOUSE Cuedc1 protein OS=Mus musculus GN=Cuedc1 PE=2 SV=1;sp|Q8R3V6|CUED1_MOUSE CUE domain-containing protein 1 OS=Mus musculus GN=Cuedc1 PE=2 SV=2;tr|Q3TRP3	29056000	10041000	4836600	22144000	50559000	12279000	43544000	51757000	12293000	13912000	1709200	590640	284510	1302600	2974100	722290	2561400	3044500	723110	34346000	34098000	32451000	0	52480000	26044000	49506000	77399000	33311000	5	5	5	16.2	16.2	16.2	42.828	0	8.5486	236510000	31	3	3	2	2	4
366	Q9CR32;A2RS68;Q62376;Q6ZWP0;Q62376-2;Q7TT81	Q9CR32;A2RS68;Q62376;Q6ZWP0;Q62376-2;Q7TT81	U1 small nuclear ribonucleoprotein 70 kDa	Snrnp70	tr|Q9CR32|Q9CR32_MOUSE Putative uncharacterized protein (Fragment) OS=Mus musculus GN=Snrnp70 PE=2 SV=3;tr|A2RS68|A2RS68_MOUSE Small nuclear ribonucleoprotein 70 (U1) OS=Mus musculus GN=Snrnp70 PE=2 SV=1;sp|Q62376|RU17_MOUSE U1 small nuclear ribonucleoprot	1514400000	598410000	356050000	2823600000	1791100000	1600100000	420880000	281730000	118880000	559120000	89080000	35201000	20944000	166090000	105360000	94123000	24758000	16572000	6992800	1497500000	1235000000	1125100000	2064100000	2156900000	2352600000	470780000	401100000	530320000	21	21	21	65.3	65.3	65.3	29.421	0	141.7	9505100000	168	18	14	13	19	18
367	Q8VCE7;A2RS96;Q9CXE7;Q3U9T7;Q3TW73;E9PXY3;D3Z615;Q8C5H9;Q3V440;E9Q2J2;Q8C954	Q8VCE7;A2RS96;Q9CXE7;Q3U9T7;Q3TW73;E9PXY3	Transmembrane emp24 domain-containing protein 5	Tmed5	tr|Q8VCE7|Q8VCE7_MOUSE Transmembrane emp24 protein transport domain containing 5 OS=Mus musculus GN=Tmed5 PE=2 SV=1;tr|A2RS96|A2RS96_MOUSE Transmembrane emp24 protein transport domain containing 5 OS=Mus musculus GN=Tmed5 PE=2 SV=1;sp|Q9CXE7|TMED5_MOUSE Tr	97948000	37876000	37874000	93941000	77288000	36508000	130570000	90935000	36158000	49161000	7534500	2913600	2913400	7226300	5945200	2808300	10044000	6995000	2781400	91677000	97876000	127320000	193350000	139970000	116080000	139760000	103280000	114340000	6	6	6	25.3	25.3	25.3	26.186	0	15.697	639100000	26	6	6	4	3	3
368	A2RSB1;B7ZNL2;Q8C1W9;Q78ZA7	A2RSB1;B7ZNL2;Q8C1W9;Q78ZA7	Nucleosome assembly protein 1-like 4	Nap1l4	tr|A2RSB1|A2RSB1_MOUSE Nucleosome assembly protein 1-like 4 OS=Mus musculus GN=Nap1l4 PE=2 SV=1;tr|B7ZNL2|B7ZNL2_MOUSE Nap1l4 protein OS=Mus musculus GN=Nap1l4 PE=2 SV=1;tr|Q8C1W9|Q8C1W9_MOUSE Putative uncharacterized protein OS=Mus musculus GN=Nap1l4 PE=2	1138900000	458660000	413450000	1413000000	1333300000	674470000	2088000000	1473100000	813410000	544800000	63270000	25481000	22969000	78500000	74075000	37470000	116000000	81840000	45190000	1376000000	1373200000	1420300000	1255200000	1358000000	1242300000	1730400000	1906300000	1839900000	12	12	10	42.1	42.1	39.5	42.679	0	274.16	9806400000	128	9	9	8	11	12
369	A2RSF1;Q8K4M5;Q3UGT3;G8JL54;F7BCN0;F7BZY0;Q8VI86	A2RSF1;Q8K4M5;Q3UGT3;G8JL54;F7BCN0;F7BZY0;Q8VI86	COMM domain-containing protein 1	Commd1;Gm28048	tr|A2RSF1|A2RSF1_MOUSE COMM domain containing 1 OS=Mus musculus GN=Commd1 PE=2 SV=1;sp|Q8K4M5|COMD1_MOUSE COMM domain-containing protein 1 OS=Mus musculus GN=Commd1 PE=2 SV=2;tr|Q3UGT3|Q3UGT3_MOUSE Putative uncharacterized protein OS=Mus musculus GN=Commd1	29191000	35581000	6399200	94305000	127390000	51092000	103030000	122690000	67784000	91066000	4170200	5083000	914180	13472000	18199000	7298900	14718000	17527000	9683400	71782000	65361000	47250000	135510000	163710000	98649000	108110000	167040000	140290000	4	4	4	28.7	28.7	28.7	20.996	0	15.7	637460000	20	3	4	1	3	3
370	A2RSJ4;Q8C318;Q922V6;Q9D574	A2RSJ4	UHRF1-binding protein 1-like	Uhrf1bp1l	sp|A2RSJ4|UH1BL_MOUSE UHRF1-binding protein 1-like OS=Mus musculus GN=Uhrf1bp1l PE=1 SV=2	187560000	83585000	41962000	165500000	162040000	124240000	459690000	318630000	107630000	17751000	2016800	898770	451200	1779500	1742400	1335900	4942900	3426200	1157300	255480000	294640000	325550000	186590000	182690000	164650000	296490000	281330000	322250000	25	25	23	22.4	22.4	21.5	161.94	0	50.738	1650800000	78	18	14	8	17	11
371	Q5SX17;Q3USA0;A2RSK7;Q9Z0E8;Q9WTN6	Q5SX17;Q3USA0;A2RSK7;Q9Z0E8;Q9WTN6	Solute carrier family 22 member 5;Solute carrier family 22 member 21	Slc22a5;Slc22a21	tr|Q5SX17|Q5SX17_MOUSE MCG13781, isoform CRA_b OS=Mus musculus GN=Slc22a5 PE=2 SV=1;tr|Q3USA0|Q3USA0_MOUSE Putative uncharacterized protein OS=Mus musculus GN=Slc22a5 PE=2 SV=1;tr|A2RSK7|A2RSK7_MOUSE MCG13774, isoform CRA_c OS=Mus musculus GN=Slc22a21 PE=2	10421000	3872100	0	5531300	6529700	2950000	13227000	5351500	0	2520200	548480	203800	0	291120	343670	155270	696180	281660	0	0	12941000	0	0	0	0	0	0	0	1	1	1	2.2	2.2	2.2	62.779	0.0011344	3.2197	47883000	6	1	1	0	1	1
372	A2RSQ0	A2RSQ0	DENN domain-containing protein 5B	Dennd5b	sp|A2RSQ0|DEN5B_MOUSE DENN domain-containing protein 5B OS=Mus musculus GN=Dennd5b PE=1 SV=2	100540000	32099000	13981000	41188000	25970000	25229000	203050000	429340000	46890000	13706000	1500600	479080	208680	614750	387610	376560	3030600	6408100	699850	163130000	132000000	94914000	80916000	86309000	96150000	339410000	284800000	188840000	17	15	15	17.5	15.6	15.6	144.63	0	19.561	918290000	29	12	11	7	9	7
373	B7ZNK6;A2RSS6;Q64191	B7ZNK6;A2RSS6;Q64191	N(4)-(beta-N-acetylglucosaminyl)-L-asparaginase;Glycosylasparaginase alpha chain;Glycosylasparaginase beta chain	Aga	tr|B7ZNK6|B7ZNK6_MOUSE Aga protein OS=Mus musculus GN=Aga PE=2 SV=1;tr|A2RSS6|A2RSS6_MOUSE Aspartylglucosaminidase OS=Mus musculus GN=Aga PE=2 SV=1;sp|Q64191|ASPG_MOUSE N(4)-(beta-N-acetylglucosaminyl)-L-asparaginase OS=Mus musculus GN=Aga PE=2 SV=1	0	0	0	24651000	18331000	7961900	16757000	17084000	5906400	5334800	0	0	0	1450100	1078300	468340	985720	1004900	347440	0	0	0	0	0	0	0	0	13470000	1	1	1	3.6	3.6	3.6	35.925	0.0035391	2.0343	90692000	6	0	0	0	1	1
374	Q8BTH7;A2RSV5;P61372-2;P61372	Q8BTH7;A2RSV5;P61372-2;P61372	Insulin gene enhancer protein ISL-1	Isl1	tr|Q8BTH7|Q8BTH7_MOUSE Putative uncharacterized protein OS=Mus musculus GN=Isl1 PE=2 SV=1;tr|A2RSV5|A2RSV5_MOUSE ISL1 transcription factor, LIM/homeodomain OS=Mus musculus GN=Isl1 PE=2 SV=1;sp|P61372-2|ISL1_MOUSE Isoform Beta of Insulin gene enhancer prote	0	0	0	0	0	0	0	259690000	0	11804000	0	0	0	0	0	0	0	11804000	0	0	0	0	0	0	0	0	300030000	0	1	1	1	3.4	3.4	3.4	39.084	1	-2	259690000	1	0	0	0	0	0
375	A2RSV8;P19783;M0QWX7;M0QWX2;D6RG40	A2RSV8;P19783	Cytochrome c oxidase subunit 4 isoform 1, mitochondrial	Cox4i1	tr|A2RSV8|A2RSV8_MOUSE Cytochrome c oxidase subunit IV isoform 1 OS=Mus musculus GN=Cox4i1 PE=2 SV=1;sp|P19783|COX41_MOUSE Cytochrome c oxidase subunit 4 isoform 1, mitochondrial OS=Mus musculus GN=Cox4i1 PE=1 SV=2	21886000000	8681800000	7769900000	35228000000	20503000000	12708000000	18786000000	13183000000	9586500000	12361000000	1823900000	723480000	647490000	2935700000	1708500000	1059000000	1565500000	1098600000	798880000	25968000000	19735000000	24780000000	27815000000	23936000000	24558000000	20770000000	20810000000	24294000000	16	16	16	65.1	65.1	65.1	19.53	0	323.31	148330000000	1500	16	16	15	16	16
376	A2RSW6;Q8CFA2	A2RSW6;Q8CFA2	Aminomethyltransferase;Aminomethyltransferase, mitochondrial	Amt	tr|A2RSW6|A2RSW6_MOUSE Aminomethyltransferase OS=Mus musculus GN=Amt PE=2 SV=1;sp|Q8CFA2|GCST_MOUSE Aminomethyltransferase, mitochondrial OS=Mus musculus GN=Amt PE=1 SV=1	236080000	131900000	48802000	342950000	275990000	159490000	447170000	397210000	188450000	101270000	10731000	5995500	2218300	15589000	12545000	7249700	20326000	18055000	8566000	366130000	427360000	438210000	527550000	396010000	554630000	754050000	680090000	622990000	13	13	13	40.4	40.4	40.4	44.008	0	133.18	2228000000	69	12	8	4	11	11
377	A2RSX9;E9Q3G5;Q3TVE1;E9QAY5	A2RSX9;E9Q3G5;Q3TVE1;E9QAY5		Arfip1	tr|A2RSX9|A2RSX9_MOUSE Arfip1 protein OS=Mus musculus GN=Arfip1 PE=2 SV=1;tr|E9Q3G5|E9Q3G5_MOUSE Protein Arfip1 OS=Mus musculus GN=Arfip1 PE=4 SV=1;tr|Q3TVE1|Q3TVE1_MOUSE Putative uncharacterized protein (Fragment) OS=Mus musculus GN=Arfip1 PE=2 SV=1;tr|E9	119000000	97254000	74205000	64186000	139920000	55859000	291740000	245630000	136290000	48964000	4760100	3890100	2968200	2567400	5596900	2234300	11670000	9825300	5451600	175720000	245390000	365840000	149650000	166250000	161770000	290720000	294790000	228480000	8	8	1	32.3	32.3	4.1	38.416	0	49.902	1224100000	36	4	5	6	4	6
378	A2RSY1-3;A2RSY1-2;A2RSY1	A2RSY1-3;A2RSY1-2;A2RSY1	KAT8 regulatory NSL complex subunit 3	Kansl3	sp|A2RSY1-3|KANL3_MOUSE Isoform 3 of KAT8 regulatory NSL complex subunit 3 OS=Mus musculus GN=Kansl3;sp|A2RSY1-2|KANL3_MOUSE Isoform 2 of KAT8 regulatory NSL complex subunit 3 OS=Mus musculus GN=Kansl3;sp|A2RSY1|KANL3_MOUSE KAT8 regulatory NSL complex subu	11564000	8958400	0	18135000	14275000	12873000	1943800	807570	588230	1686500	282050	218500	0	442330	348170	313970	47409	19697	14347	20496000	29295000	0	32348000	24455000	26863000	0	0	0	3	3	3	4.2	4.2	4.2	82.031	0.002307	2.472	69145000	7	3	2	0	3	3
379	A2RSY6;A2RSY6-2	A2RSY6;A2RSY6-2	TRMT1-like protein	Trmt1l	sp|A2RSY6|TRM1L_MOUSE TRMT1-like protein OS=Mus musculus GN=Trmt1l PE=2 SV=1;sp|A2RSY6-2|TRM1L_MOUSE Isoform 2 of TRMT1-like protein OS=Mus musculus GN=Trmt1l	73519000	72698000	0	42492000	58151000	63593000	6615800	11382000	14194000	7290300	1564200	1546800	0	904080	1237300	1353000	140760	242170	302000	58249000	223380000	0	110250000	188480000	153960000	0	108450000	0	8	8	8	16.9	16.9	16.9	80.86	0	24.135	342650000	14	3	2	0	6	6
380	A2RT05;P27545	A2RT05;P27545	Ceramide synthase 1	Lass1;Cers1	tr|A2RT05|A2RT05_MOUSE LAG1 homolog, ceramide synthase 1 OS=Mus musculus GN=Lass1 PE=2 SV=1;sp|P27545|CERS1_MOUSE Ceramide synthase 1 OS=Mus musculus GN=Cers1 PE=1 SV=1	90462000	102830000	26555000	245790000	169170000	109170000	161510000	133270000	103550000	76153000	6030800	6855100	1770400	16386000	11278000	7278100	10767000	8884900	6903300	139260000	157810000	297070000	173260000	158500000	145360000	151500000	219560000	213090000	5	5	5	18.6	18.6	18.6	40.1	0	23.947	1142300000	44	4	4	2	5	5
381	A2RT28;Q499X9	A2RT28;Q499X9	Methionine--tRNA ligase, mitochondrial	Mars2	tr|A2RT28|A2RT28_MOUSE Methionine-tRNA synthetase 2 (Mitochondrial) OS=Mus musculus GN=Mars2 PE=2 SV=1;sp|Q499X9|SYMM_MOUSE Methionine--tRNA ligase, mitochondrial OS=Mus musculus GN=Mars2 PE=2 SV=2	115560000	42253000	42985000	358910000	222320000	96583000	211090000	160150000	82753000	45951000	3984700	1457000	1482300	12376000	7666100	3330500	7279000	5522300	2853500	183670000	173090000	199990000	391730000	358220000	351570000	324360000	326760000	311030000	13	13	13	31.4	31.4	31.4	65.804	0	138.13	1332600000	84	12	8	7	13	13
382	A2RT57;Q9CQC8;Q9CQC8-2	A2RT57;Q9CQC8;Q9CQC8-2	Maspardin	Spg21	tr|A2RT57|A2RT57_MOUSE Spastic paraplegia 21 homolog (Human) OS=Mus musculus GN=Spg21 PE=2 SV=1;sp|Q9CQC8|SPG21_MOUSE Maspardin OS=Mus musculus GN=Spg21 PE=1 SV=1;sp|Q9CQC8-2|SPG21_MOUSE Isoform 2 of Maspardin OS=Mus musculus GN=Spg21	19207000	3614900	2588000	5580500	15948000	5147700	23078000	13934000	14282000	5743300	1067000	200830	143780	310030	885990	285980	1282100	774110	793430	0	0	0	0	23886000	0	25152000	22160000	26263000	2	2	2	9.1	9.1	9.1	34.952	0.00044196	4.0082	103380000	6	2	2	1	1	2
383	B2RPY3;A2RT62	B2RPY3;A2RT62	F-box/LRR-repeat protein 16	Fbxl16	tr|B2RPY3|B2RPY3_MOUSE F-box and leucine-rich repeat protein 16 OS=Mus musculus GN=Fbxl16 PE=2 SV=1;sp|A2RT62|FXL16_MOUSE F-box/LRR-repeat protein 16 OS=Mus musculus GN=Fbxl16 PE=2 SV=1	258520000	174830000	85682000	395480000	375500000	191090000	505000000	440460000	212920000	105580000	10341000	6993100	3427300	15819000	15020000	7643600	20200000	17619000	8516800	428680000	531410000	481660000	460070000	517020000	483400000	623890000	609020000	597220000	19	19	19	53.9	53.9	53.9	51.878	0	193.88	2639500000	118	13	16	12	18	15
384	A2RT67;G3UYA1;F7B6S5	A2RT67;G3UYA1;F7B6S5	DENN domain-containing protein 3	Dennd3	sp|A2RT67|DEND3_MOUSE DENN domain-containing protein 3 OS=Mus musculus GN=Dennd3 PE=2 SV=2;tr|G3UYA1|G3UYA1_MOUSE DENN domain-containing protein 3 OS=Mus musculus GN=Dennd3 PE=4 SV=1;tr|F7B6S5|F7B6S5_MOUSE DENN domain-containing protein 3 (Fragment) OS=Mus	3201900	1702100	915650	3657200	2239900	0	32788000	31015000	10756000	1027100	38118	20263	10901	43538	26665	0	390330	369230	128040	0	8038800	8287700	4664800	6621900	0	46831000	37293000	10229000	6	6	6	6.8	6.8	6.8	143.89	0.00015246	4.791	86276000	9	2	3	2	3	2
385	Q9D6U7;A2RTA0;P07310	Q9D6U7;A2RTA0;P07310	Creatine kinase M-type	Ckm	tr|Q9D6U7|Q9D6U7_MOUSE Putative uncharacterized protein OS=Mus musculus GN=Ckm PE=2 SV=1;tr|A2RTA0|A2RTA0_MOUSE Creatine kinase, muscle OS=Mus musculus GN=Ckm PE=2 SV=1;sp|P07310|KCRM_MOUSE Creatine kinase M-type OS=Mus musculus GN=Ckm PE=1 SV=1	277480000	77590000	80718000	434850000	972330000	397950000	322640000	212600000	145820000	116880000	11099000	3103600	3228700	17394000	38893000	15918000	12906000	8504000	5832800	432420000	276000000	373850000	344060000	1404400000	1069300000	506490000	344960000	508770000	6	2	2	17.3	12.1	12.1	43.03	0	35.911	2922000000	96	5	5	4	4	3
386	A2RTC8;Q3KNM2;F6W8T3	A2RTC8;Q3KNM2	E3 ubiquitin-protein ligase MARCH5	2005-03-01	tr|A2RTC8|A2RTC8_MOUSE MCG13921, isoform CRA_b OS=Mus musculus GN=March5 PE=2 SV=1;sp|Q3KNM2|MARH5_MOUSE E3 ubiquitin-protein ligase MARCH5 OS=Mus musculus GN=March5 PE=2 SV=1	432490000	289420000	224840000	509780000	600720000	197240000	586250000	544960000	440390000	225060000	25441000	17025000	13226000	29987000	35337000	11602000	34485000	32057000	25905000	654610000	929100000	878230000	747240000	655480000	753570000	681780000	721880000	765380000	9	9	9	39.2	39.2	39.2	31.231	0	84.495	3826100000	110	9	9	7	8	9
387	A2RTH5;Q9D963	A2RTH5		Lcmt1	tr|A2RTH5|A2RTH5_MOUSE Leucine carboxyl methyltransferase 1 OS=Mus musculus GN=Lcmt1 PE=2 SV=1	326440000	191390000	72284000	310170000	177610000	138720000	610250000	364930000	257600000	116640000	15545000	9113900	3442100	14770000	8457600	6605700	29060000	17378000	12267000	596500000	586710000	322500000	426410000	483830000	420530000	633820000	539520000	526090000	12	12	7	39.2	39.2	20.8	38.192	0	39.011	2449400000	94	10	10	6	10	10
388	A2RTI3;O89017;Q3UE99	A2RTI3;O89017	Legumain	Lgmn	tr|A2RTI3|A2RTI3_MOUSE Legumain OS=Mus musculus GN=Lgmn PE=2 SV=1;sp|O89017|LGMN_MOUSE Legumain OS=Mus musculus GN=Lgmn PE=1 SV=1	35412000	32552000	13982000	122000000	95310000	101200000	9658300	28230000	20383000	20851000	1609700	1479600	635550	5545600	4332300	4599800	439010	1283200	926490	85925000	65982000	66147000	118290000	87299000	141800000	0	41266000	58873000	7	7	7	23.4	23.4	23.4	49.372	0	14.752	458730000	17	4	3	2	6	3
389	A2RTT4;P61089;Q9CQ37	A2RTT4;P61089	Ubiquitin-conjugating enzyme E2 N	Ube2n	tr|A2RTT4|A2RTT4_MOUSE MCG4297 OS=Mus musculus GN=Ube2n PE=2 SV=1;sp|P61089|UBE2N_MOUSE Ubiquitin-conjugating enzyme E2 N OS=Mus musculus GN=Ube2n PE=1 SV=1	4320200000	1889000000	1406900000	4783900000	3704100000	1604600000	4934700000	4740300000	1969000000	2668400000	392740000	171720000	127900000	434900000	336730000	145870000	448610000	430940000	179000000	5979400000	6335400000	4311700000	5948100000	3966300000	3814100000	6698700000	6867700000	5469200000	11	11	11	76.3	76.3	76.3	17.138	0	156.36	29353000000	335	10	10	10	10	11
390	C8YIX4;Q8CHP4;Q8CHP3;Q3UM93;Q3ULZ7;A2VCP3;Q9Z1M0;Q3UN00;Q3TBP1;F8WI93;Q6P5P0	C8YIX4;Q8CHP4;Q8CHP3;Q3UM93;Q3ULZ7;A2VCP3;Q9Z1M0;Q3UN00;Q3TBP1;F8WI93	P2X purinoceptor;P2X purinoceptor 7	P2rx7	tr|C8YIX4|C8YIX4_MOUSE P2X purinoceptor OS=Mus musculus GN=P2rx7 PE=2 SV=1;tr|Q8CHP4|Q8CHP4_MOUSE P2X purinoceptor OS=Mus musculus GN=P2rx7 PE=2 SV=1;tr|Q8CHP3|Q8CHP3_MOUSE P2X purinoceptor OS=Mus musculus GN=P2rx7 PE=2 SV=1;tr|Q3UM93|Q3UM93_MOUSE P2X puri	87262000	40307000	12302000	46498000	64132000	17827000	139830000	149670000	80802000	18247000	2493200	1151600	351480	1328500	1832300	509340	3995200	4276200	2308600	99479000	107490000	97670000	56025000	78424000	50282000	121100000	161920000	131090000	9	9	9	19.3	19.3	19.3	67.773	0	19.649	638630000	30	9	8	2	7	5
391	A2VDF5;C9K0Y6;Q3TZK0;Q3TTV2;Q3UY17;B0QZW2	A2VDF5;C9K0Y6;Q3TZK0;Q3TTV2		Gria3	tr|A2VDF5|A2VDF5_MOUSE Gria3 protein OS=Mus musculus GN=Gria3 PE=2 SV=1;tr|C9K0Y6|C9K0Y6_MOUSE AMPA-selective glutamate receptor 3 short type OS=Mus musculus GN=Gria3 PE=2 SV=1;tr|Q3TZK0|Q3TZK0_MOUSE Putative uncharacterized protein OS=Mus musculus GN=Gria	136240000	106280000	58751000	23769000	25008000	21951000	310350000	206050000	196960000	22612000	2838300	2214100	1224000	495190	521000	457320	6465700	4292700	4103400	0	440460000	0	0	0	0	0	0	0	31	1	1	40.4	1.6	1.6	100.44	0	5.2799	1085400000	16	26	25	21	24	23
392	A2VDF7;D3Z7I7;O88343-3	A2VDF7	Anion exchange protein	Slc4a4	tr|A2VDF7|A2VDF7_MOUSE Slc4a4 protein (Fragment) OS=Mus musculus GN=Slc4a4 PE=2 SV=1	0	0	0	0	2000000	0	4326900	0	0	147140	0	0	0	0	46511	0	100630	0	0	0	0	0	0	0	0	5312400	0	0	37	1	1	39.3	0.8	0.8	118.78	1	-2	6326900	0	33	31	32	32	32
393	A2VDH3	A2VDH3	Leucine-rich repeat-containing protein 38	Lrrc38	sp|A2VDH3|LRC38_MOUSE Leucine-rich repeat-containing protein 38 OS=Mus musculus GN=Lrrc38 PE=2 SV=2	3360600	0	0	0	0	0	6715300	0	3985800	1081700	258500	0	0	0	0	0	516560	0	306600	0	0	0	0	0	0	0	0	16077000	1	1	1	4.7	4.7	4.7	32.342	0.0030614	2.2341	14062000	0	1	0	0	0	0
394	A3KCG1;Q8BWG9	A3KCG1;Q8BWG9	Calcium release-activated calcium channel protein 1	Orai1	tr|A3KCG1|A3KCG1_MOUSE Calcium release-activated calcium channel 1 OS=Mus musculus GN=Orai1 PE=2 SV=1;sp|Q8BWG9|CRCM1_MOUSE Calcium release-activated calcium channel protein 1 OS=Mus musculus GN=Orai1 PE=2 SV=1	0	0	0	0	0	0	0	0	8268900	1033600	0	0	0	0	0	0	0	0	1033600	0	0	0	0	0	0	0	0	15948000	1	1	1	4.3	4.3	4.3	33.061	0	8.7681	8268900	2	0	0	0	0	1
395	A3KCG3;Q6P8G8;D3Z6X8;D3YX58	A3KCG3;Q6P8G8;D3Z6X8;D3YX58	Protein orai-3	Orai3	tr|A3KCG3|A3KCG3_MOUSE Calcium release-activated calcium channel 3 OS=Mus musculus GN=Orai3 PE=2 SV=1;sp|Q6P8G8|ORAI3_MOUSE Protein orai-3 OS=Mus musculus GN=Orai3 PE=2 SV=1;tr|D3Z6X8|D3Z6X8_MOUSE Protein orai-3 OS=Mus musculus GN=Orai3 PE=4 SV=1;tr|D3YX58	2896800	2096900	0	2788000	2552400	0	11838000	9477800	5669100	5331400	413830	299560	0	398290	364630	0	1691200	1354000	809870	0	0	0	0	0	0	0	0	12929000	2	2	2	8.3	8.3	8.3	31.358	0.0014086	3.1119	37319000	2	1	1	0	1	1
396	A3KFU5;Q99LF8;Q6PHQ9;Q91YZ8;D3Z5M2;A3KFU8;Q3UX16;V9GXG3;Q3TSA5;Q3TUS5	A3KFU5;Q99LF8;Q6PHQ9;Q91YZ8;D3Z5M2;A3KFU8;Q3UX16	Polyadenylate-binding protein	Pabpc4;Gm10110	tr|A3KFU5|A3KFU5_MOUSE Protein Pabpc4 OS=Mus musculus GN=Pabpc4 PE=4 SV=1;tr|Q99LF8|Q99LF8_MOUSE Poly(A) binding protein, cytoplasmic 4 OS=Mus musculus GN=Pabpc4 PE=2 SV=1;tr|Q6PHQ9|Q6PHQ9_MOUSE MCG5546, isoform CRA_c OS=Mus musculus GN=Pabpc4 PE=2 SV=1;tr	40480000	12703000	11727000	51169000	27006000	12202000	48709000	29146000	46874000	6829700	987320	309830	286030	1248000	658680	297610	1188000	710870	1143300	54936000	28743000	0	39943000	63204000	30333000	60832000	60501000	26884000	16	7	7	27.4	12.8	12.8	69.43	0	10.526	280020000	17	11	10	8	11	11
397	A3KFX0;Q6P906;Q91YE9-2;Q91YE9	A3KFX0	Cytosolic 5-nucleotidase 1A	Nt5c1a	sp|A3KFX0|5NT1A_MOUSE Cytosolic 5-nucleotidase 1A OS=Mus musculus GN=Nt5c1a PE=2 SV=1	152230000	76684000	33177000	181530000	162880000	112790000	188010000	137780000	45769000	43633000	6089200	3067400	1327100	7261100	6515000	4511400	7520200	5511300	1830800	196410000	186110000	251550000	157270000	121470000	182740000	154550000	169260000	147870000	13	13	13	47.9	47.9	47.9	40.678	0	59.554	1090800000	57	9	11	4	12	11
398	A3KG01;A3KG02;A3KG00;Q6P5F1;P54763;P54763-2;F6Q4H2;E9PUK8;Q3V2Z8;Q03145;A2BDW0;Q7TMU1;P35991	A3KG01;A3KG02;A3KG00;Q6P5F1;P54763;P54763-2	Receptor protein-tyrosine kinase;Ephrin type-B receptor 2	Ephb2	tr|A3KG01|A3KG01_MOUSE Eph receptor B2 OS=Mus musculus GN=Ephb2 PE=2 SV=2;tr|A3KG02|A3KG02_MOUSE Ephrin type-B receptor 2 OS=Mus musculus GN=Ephb2 PE=4 SV=1;tr|A3KG00|A3KG00_MOUSE Ephrin type-B receptor 2 OS=Mus musculus GN=Ephb2 PE=4 SV=2;tr|Q6P5F1|Q6P5F1	489820000	203920000	206970000	609280000	530590000	236330000	2197500000	1546300000	776560000	125880000	9070700	3776400	3832800	11283000	9825800	4376500	40695000	28635000	14381000	619690000	673100000	844390000	674170000	626150000	561880000	2020800000	1917600000	2137900000	35	35	30	48.3	48.3	42.1	109.9	0	243.98	6797300000	190	24	22	18	25	25
399	A3KG44;Q8VC91;E9Q2Y3;Q7TSS3;O88522;A3KG40;A3KG41;Q3UG24;A3KG38	A3KG44;Q8VC91;E9Q2Y3;Q7TSS3;O88522;A3KG40;A3KG41;Q3UG24;A3KG38	NF-kappa-B essential modulator	Ikbkg	tr|A3KG44|A3KG44_MOUSE NF-kappa-B essential modulator (Fragment) OS=Mus musculus GN=Ikbkg PE=4 SV=1;tr|Q8VC91|Q8VC91_MOUSE Ikbkg protein OS=Mus musculus GN=Ikbkg PE=2 SV=1;tr|E9Q2Y3|E9Q2Y3_MOUSE NF-kappa-B essential modulator OS=Mus musculus GN=Ikbkg PE=4	14272000	11279000	0	18862000	9892000	6615400	33951000	24416000	4613800	7743900	892000	704940	0	1178900	618250	413470	2121900	1526000	288360	24522000	26588000	0	13338000	19110000	10689000	23915000	31061000	0	3	3	3	21.1	21.1	21.1	21.964	0	15.164	123900000	8	2	3	0	3	2
400	A3KG93;Q6ZQ88;G8JL40;F6Z4I3;F6ZC60	A3KG93;Q6ZQ88;G8JL40	Lysine-specific histone demethylase 1A	Kdm1a	tr|A3KG93|A3KG93_MOUSE Lysine-specific histone demethylase 1A OS=Mus musculus GN=Kdm1a PE=4 SV=1;sp|Q6ZQ88|KDM1A_MOUSE Lysine-specific histone demethylase 1A OS=Mus musculus GN=Kdm1a PE=1 SV=2;tr|G8JL40|G8JL40_MOUSE Lysine-specific histone demethylase 1A (	233780000	70922000	50521000	273370000	230500000	146030000	41322000	28620000	10881000	24132000	5195100	1576000	1122700	6074900	5122300	3245100	918270	636000	241800	366450000	328020000	284720000	262600000	248800000	268470000	57817000	71398000	49430000	19	19	19	29.3	29.3	29.3	94.658	0	33.736	1085900000	66	14	11	6	18	17
401	A3KGA5;Q61908	A3KGA5;Q61908	Cx9C motif-containing protein 4	Mtcp1;Cmc4	tr|A3KGA5|A3KGA5_MOUSE Mature T-cell proliferation 1 OS=Mus musculus GN=Mtcp1 PE=2 SV=1;sp|Q61908|CMC4_MOUSE Cx9C motif-containing protein 4 OS=Mus musculus GN=Cmc4 PE=2 SV=1	11891000	0	0	7428700	15854000	1737400	25241000	11557000	923890	18658000	2972700	0	0	1857200	3963400	434350	6310200	2889300	230970	0	0	0	0	0	2429200	0	0	0	1	1	1	13.2	13.2	13.2	7.743	0.0037795	1.972	74632000	4	1	0	0	1	1
402	B9EKQ1;A3KGB4	B9EKQ1;A3KGB4	TBC1 domain family member 8B	Tbc1d8b	tr|B9EKQ1|B9EKQ1_MOUSE Tbc1d8b protein OS=Mus musculus GN=Tbc1d8b PE=2 SV=1;sp|A3KGB4|TBC8B_MOUSE TBC1 domain family member 8B OS=Mus musculus GN=Tbc1d8b PE=2 SV=1	15804000	9464100	8176900	4299100	3195200	4233300	67247000	55098000	32773000	3453300	272490	163170	140980	74122	55089	72987	1159400	949970	565050	0	45820000	70217000	0	0	0	53207000	77332000	58029000	8	8	8	9	9	9	127.47	0	17.071	200290000	14	1	4	3	1	1
403	A3KGL9;E9Q2Z4;Q5BL14;Q58E57;J3QM43;B7ZCQ3;F6W687;P09602;Q5XK38	A3KGL9;E9Q2Z4;Q5BL14;Q58E57;J3QM43;B7ZCQ3;F6W687;P09602;Q5XK38	Non-histone chromosomal protein HMG-17	Hmgn2;Gm16494;Gm6594	tr|A3KGL9|A3KGL9_MOUSE Non-histone chromosomal protein HMG-17 OS=Mus musculus GN=Hmgn2 PE=1 SV=1;tr|E9Q2Z4|E9Q2Z4_MOUSE Protein Gm16494 OS=Mus musculus GN=Gm16494 PE=4 SV=1;tr|Q5BL14|Q5BL14_MOUSE High mobility group nucleosomal binding domain 2 OS=Mus musc	812050000	210320000	234870000	465430000	241200000	836080000	93831000	26481000	84309000	751140000	203010000	52581000	58717000	116360000	60301000	209020000	23458000	6620200	21077000	523120000	371930000	222570000	307160000	388350000	3307500000	59223000	34774000	222590000	4	4	4	35.4	35.4	35.4	9.7258	0	16.9	3004600000	33	3	3	3	3	3
404	A3KGQ6;Q9D898	A3KGQ6;Q9D898	Actin-related protein 2/3 complex subunit 5;Actin-related protein 2/3 complex subunit 5-like protein	Arpc5l	tr|A3KGQ6|A3KGQ6_MOUSE Actin-related protein 2/3 complex subunit 5 OS=Mus musculus GN=Arpc5l PE=3 SV=1;sp|Q9D898|ARP5L_MOUSE Actin-related protein 2/3 complex subunit 5-like protein OS=Mus musculus GN=Arpc5l PE=1 SV=1	992210000	564860000	496830000	1005800000	721200000	451290000	2922300000	1370300000	1127800000	804390000	82684000	47071000	41403000	83820000	60100000	37607000	243520000	114200000	93984000	1134000000	1829600000	1845000000	957150000	1008100000	1144400000	2254000000	2081800000	2459700000	8	8	8	67.3	67.3	67.3	17.109	0	241.83	9652600000	213	7	6	6	6	6
405	F7CGP0;A3KGS3-2;A3KGS3;B2RX86;F7AI67	F7CGP0;A3KGS3-2;A3KGS3;B2RX86	Ral GTPase-activating protein subunit alpha-2	Ralgapa2	tr|F7CGP0|F7CGP0_MOUSE Ral GTPase-activating protein subunit alpha-2 (Fragment) OS=Mus musculus GN=Ralgapa2 PE=1 SV=1;sp|A3KGS3-2|RGPA2_MOUSE Isoform 2 of Ral GTPase-activating protein subunit alpha-2 OS=Mus musculus GN=Ralgapa2;sp|A3KGS3|RGPA2_MOUSE Ral G	2756200	5843000	3585600	0	0	0	5212300	35889000	5883900	696120	32426	68742	42183	0	0	0	61321	422230	69223	0	0	0	0	0	0	0	90173000	0	4	3	3	2.6	2.2	2.2	174.41	0.00044491	4.1622	59170000	4	2	2	2	1	1
406	A3KGU4	A3KGU4		Sptan1	tr|A3KGU4|A3KGU4_MOUSE Spectrin alpha chain, non-erythrocytic 1 (Fragment) OS=Mus musculus GN=Sptan1 PE=4 SV=1	0	4657100	0	0	0	8863500	0	0	0	1126700	0	388100	0	0	0	738630	0	0	0	0	0	0	0	0	40881000	0	0	0	16	1	1	88.2	4.4	4.4	16.09	1	-2	13521000	1	15	15	11	13	13
407	A3KGU5;Q3V1V5;Q3URW8;Q3TYI8;Q58ES7;Q6PA04;Q3TNY2;O70192;Q3UPN9;Q3U5D0;Q3TTL3;REV__Q6PD42;REV__Q3UZD9;REV__E9Q770;REV__E9PVC6;REV__Q6NZJ6-2;REV__E9Q9E1;REV__E9PVC5;REV__Q6NZJ6;P28033-2;P28033-3;P28033;Q80VP2	A3KGU5		Sptan1	tr|A3KGU5|A3KGU5_MOUSE Spectrin alpha chain, non-erythrocytic 1 OS=Mus musculus GN=Sptan1 PE=1 SV=1	154230000	48153000	53058000	656780000	200160000	127520000	339480000	135210000	87926000	9587900	820360	256130	282220	3493500	1064700	678300	1805700	719230	467690	117810000	110660000	178530000	391790000	178230000	171070000	199370000	145160000	177430000	242	2	0	81.9	0.7	0	282.89	0	13.473	1802500000	44	229	220	202	229	221
408	B9EKJ1;A3KGU7;B2RXX6	B9EKJ1;A3KGU7;B2RXX6		Sptan1	tr|B9EKJ1|B9EKJ1_MOUSE Spna2 protein OS=Mus musculus GN=Sptan1 PE=2 SV=1;tr|A3KGU7|A3KGU7_MOUSE Spectrin alpha chain, non-erythrocytic 1 OS=Mus musculus GN=Sptan1 PE=1 SV=1;tr|B2RXX6|B2RXX6_MOUSE Spna2 protein OS=Mus musculus GN=Sptan1 PE=2 SV=1	111900000000	50088000000	41283000000	126200000000	104160000000	68778000000	192940000000	123860000000	82935000000	4748100000	588930000	263620000	217280000	664200000	548220000	361990000	1015500000	651890000	436500000	129450000000	128260000000	130990000000	116150000000	113870000000	118750000000	179980000000	173120000000	184090000000	245	245	0	81.9	81.9	0	285.18	0	323.31	902140000000	9583	231	222	205	231	222
409	A3KGV1-2;A3KGV1-3;A3KGV1-4;A3KGV1;A3KGV9;V9GXZ0;A3KGW0;A3KGV1-7;A3KGV1-6;A3KGV1-5;Q3UFG2	A3KGV1-2;A3KGV1-3;A3KGV1-4;A3KGV1	Outer dense fiber protein 2	Odf2	sp|A3KGV1-2|ODFP2_MOUSE Isoform 2 of Outer dense fiber protein 2 OS=Mus musculus GN=Odf2;sp|A3KGV1-3|ODFP2_MOUSE Isoform 3 of Outer dense fiber protein 2 OS=Mus musculus GN=Odf2;sp|A3KGV1-4|ODFP2_MOUSE Isoform 4 of Outer dense fiber protein 2 OS=Mus muscul	17013000	5486900	3359400	65582000	51333000	17705000	5913100	4189100	1401700	3071100	303800	97980	59988	1171100	916660	316170	105590	74806	25030	23499000	20388000	0	64961000	66295000	46669000	12180000	5828300	0	5	5	5	8.7	8.7	8.7	93.293	0	12.354	171980000	10	2	2	2	4	4
410	A3KMD2;Q8BIV3	A3KMD2;Q8BIV3	Ran-binding protein 6	Ranbp6	tr|A3KMD2|A3KMD2_MOUSE RAN binding protein 6 OS=Mus musculus GN=Ranbp6 PE=2 SV=1;sp|Q8BIV3|RNBP6_MOUSE Ran-binding protein 6 OS=Mus musculus GN=Ranbp6 PE=2 SV=3	198570000	100940000	46787000	539360000	338490000	167070000	229120000	193080000	79664000	31551000	3309600	1682400	779780	8989400	5641400	2784500	3818600	3218000	1327700	345370000	381040000	414490000	449970000	323610000	458360000	272210000	328810000	224140000	30	29	29	33.4	32.3	32.3	124.59	0	44.833	1893100000	117	22	21	11	27	24
411	A3KMJ8;P61759;Q3TIR6	A3KMJ8;P61759;Q3TIR6	Prefoldin subunit 3	Vbp1	tr|A3KMJ8|A3KMJ8_MOUSE Vbp1 protein (Fragment) OS=Mus musculus GN=Vbp1 PE=2 SV=1;sp|P61759|PFD3_MOUSE Prefoldin subunit 3 OS=Mus musculus GN=Vbp1 PE=2 SV=2;tr|Q3TIR6|Q3TIR6_MOUSE Prefoldin subunit 3 OS=Mus musculus GN=Vbp1 PE=2 SV=1	280550000	193110000	86736000	233010000	283350000	116990000	426130000	309340000	103330000	135500000	18703000	12874000	5782400	15534000	18890000	7799000	28409000	20622000	6888800	424480000	407400000	254980000	321460000	397940000	279970000	460190000	446370000	345030000	9	9	9	50.3	50.3	50.3	21.963	0	18.445	2032500000	61	8	8	6	8	9
412	A3KML3;F6YY69;F6VW30;P68254-2;P68254	A3KML3;F6YY69;F6VW30;P68254-2;P68254	14-3-3 protein theta	Ywhaq	tr|A3KML3|A3KML3_MOUSE MCG126220 OS=Mus musculus GN=Ywhaq PE=2 SV=1;tr|F6YY69|F6YY69_MOUSE 14-3-3 protein theta (Fragment) OS=Mus musculus GN=Ywhaq PE=4 SV=1;tr|F6VW30|F6VW30_MOUSE 14-3-3 protein theta (Fragment) OS=Mus musculus GN=Ywhaq PE=3 SV=1;sp|P6825	12248000000	5772600000	4373900000	8767600000	8661400000	6595100000	11472000000	7873100000	6847100000	4033900000	680470000	320700000	242990000	487090000	481190000	366400000	637320000	437390000	380390000	11953000000	12725000000	13266000000	8715700000	9071100000	10323000000	12792000000	11844000000	12602000000	25	20	19	65.7	58.8	55.9	27.778	0	323.31	72611000000	598	23	23	23	24	21
413	E9Q9C5;Q8C1D9;A3KML5;Q80YP7;P63082;D3Z3B2;Q3UK60;A4FVC9	E9Q9C5;Q8C1D9;A3KML5;Q80YP7;P63082;D3Z3B2;Q3UK60	V-type proton ATPase 16 kDa proteolipid subunit	Atp6v0c	tr|E9Q9C5|E9Q9C5_MOUSE V-type proton ATPase 16 kDa proteolipid subunit (Fragment) OS=Mus musculus GN=Atp6v0c PE=3 SV=1;tr|Q8C1D9|Q8C1D9_MOUSE Putative uncharacterized protein OS=Mus musculus GN=Atp6v0c PE=2 SV=1;tr|A3KML5|A3KML5_MOUSE ATPase, H+ transporti	5775600000	794850000	467480000	4451300000	1652200000	1133000000	6342200000	4354000000	1966400000	6734300000	1443900000	198710000	116870000	1112800000	413040000	283260000	1585600000	1088500000	491600000	6592700000	2071300000	842780000	3395300000	1672100000	1877200000	4230000000	3922800000	3392800000	4	4	4	32.7	32.7	32.7	15.265	0	102.42	26937000000	376	4	2	2	4	4
414	A3KMP2;A3KMP2-2;D6RH59	A3KMP2;A3KMP2-2	Tetratricopeptide repeat protein 38	Ttc38	sp|A3KMP2|TTC38_MOUSE Tetratricopeptide repeat protein 38 OS=Mus musculus GN=Ttc38 PE=2 SV=2;sp|A3KMP2-2|TTC38_MOUSE Isoform 2 of Tetratricopeptide repeat protein 38 OS=Mus musculus GN=Ttc38	70660000	26641000	11498000	34752000	27604000	5434400	159120000	82282000	14124000	14901000	2436500	918640	396480	1198300	951860	187390	5487100	2837300	487050	96025000	83705000	80597000	57772000	33506000	36436000	179070000	80526000	51723000	8	8	8	20.6	20.6	20.6	52.223	0	27.509	432120000	22	6	6	4	5	4
415	A3KN70;Q8CHG1;Q9JLM8;Q9JLM7;Q8VDT3;Q80VB6;Q3UGP0;Q8BRN4;Q9JLM8-2	A3KN70;Q8CHG1;Q9JLM8;Q9JLM7;Q8VDT3;Q80VB6;Q3UGP0;Q8BRN4;Q9JLM8-2	Serine/threonine-protein kinase DCLK1	Dclk1	tr|A3KN70|A3KN70_MOUSE Dclk1 protein OS=Mus musculus GN=Dclk1 PE=2 SV=1;tr|Q8CHG1|Q8CHG1_MOUSE MKIAA0369 protein (Fragment) OS=Mus musculus GN=Dclk1 PE=2 SV=1;sp|Q9JLM8|DCLK1_MOUSE Serine/threonine-protein kinase DCLK1 OS=Mus musculus GN=Dclk1 PE=1 SV=1;tr	1032900000	464610000	381220000	479530000	512110000	268360000	1718300000	1315300000	807910000	178980000	26484000	11913000	9774900	12296000	13131000	6881100	44060000	33726000	20716000	1456400000	1375100000	1461900000	550120000	659960000	619410000	1742600000	2041200000	1901800000	22	21	9	34.5	33.5	13.9	82.191	0	281.64	6980300000	202	21	18	16	17	14
416	L0L4R1;L0L4K0;L0L1W8;V9TRK2;V9TQ89;V9TP30;V9TP20;V9TN76;A8DUS7;A8DUR3;W0SMJ3;W0SLU4;U6C8B8;U6C8B6;U6C7E5;U6C7D9;U6C6V9;U6C6V7;Q9TDS6;B1P8W3;R9TNV1;Q7JCZ3;Q71EK3;Q71EK1;Q71EJ7;G3EBA2;A3R3Q8;P00158;B3Y998;A8DUU6;Q36290;Q3V2T7;H8Y1I5;A0A023NE65;A0A023NCS0;A0A023NE78;A0A023NDP5;A0A023ND59;A0A023NDQ1;A0A023NCR8;A0A023NDP0;Q3V2F9;Q5VI45;Q9TET3;C4PAV8;B0LAD5;E3VQ38;Q85PJ1;G9B4I2;G9B4I1;G9B4H2;G9B4G5;G9B…	L0L4R1;L0L4K0;L0L1W8;V9TRK2;V9TQ89;V9TP30;V9TP20;V9TN76;A8DUS7;A8DUR3;W0SMJ3;W0SLU4;U6C8B8;U6C8B6;U6C7E5;U6C7D9;U6C6V9;U6C6V7;Q9TDS6;B1P8W3;R9TNV1;Q7JCZ3;Q71EK3;Q71EK1;Q71EJ7;G3EBA2;A3R3Q8;P00158;B3Y998;A8DUU6;Q36290;Q3V2T7;H8Y1I5;A0A023NE65;A0A023NCS0;A0A023NE78;A0A023NDP5;A0A023ND59;A0A023NDQ1;A0A023NCR8;A0A023NDP0;Q3V2F9	Cytochrome b	cytb;CYTB;mt-Cytb;Mt-Cyb;cytB	tr|L0L4R1|L0L4R1_MOUSE Cytochrome b (Fragment) OS=Mus musculus GN=cytb PE=3 SV=1;tr|L0L4K0|L0L4K0_MOUSE Cytochrome b (Fragment) OS=Mus musculus GN=cytb PE=3 SV=1;tr|L0L1W8|L0L1W8_MOUSE Cytochrome b (Fragment) OS=Mus musculus GN=cytb PE=3 SV=1;tr|V9TRK2|V9T	447140000	218220000	164800000	637950000	113060000	209730000	325610000	270600000	266690000	442300000	74524000	36370000	27467000	106320000	18844000	34955000	54269000	45100000	44449000	799520000	652880000	691220000	388570000	298640000	978930000	236980000	689330000	728700000	4	4	4	10.1	10.1	10.1	42.654	0.00015344	4.941	2653800000	96	4	4	2	3	4
417	Q7JCX7;Q7JCA9;G3EBA9;A3R3W7;P00416;Q5MCM5;Q5MCM2	Q7JCX7;Q7JCA9;G3EBA9;A3R3W7;P00416;Q5MCM5;Q5MCM2	Cytochrome c oxidase subunit 3	mt-Co3;COX3;COXIII	tr|Q7JCX7|Q7JCX7_MOUSE Cytochrome c oxidase subunit 3 OS=Mus musculus GN=mt-Co3 PE=2 SV=1;tr|Q7JCA9|Q7JCA9_MOUSE Cytochrome c oxidase subunit 3 OS=Mus musculus GN=COX3 PE=3 SV=1;tr|G3EBA9|G3EBA9_MOUSE Cytochrome c oxidase subunit 3 OS=Mus musculus GN=COX3	1460500000	1721100000	2445700000	3187600000	3693800000	4367200000	7276300000	2552300000	1382300000	14043000000	730270000	860550000	1222800000	1593800000	1846900000	2183600000	3638200000	1276200000	691140000	1405300000	4057200000	7337400000	3164500000	3923400000	5771800000	6811600000	3433500000	3769300000	2	1	1	7.7	5.4	5.4	29.922	0	73.489	28087000000	52	2	2	2	2	2
418	Q7JCZ0;A3R404;P03930	Q7JCZ0;A3R404;P03930	ATP synthase protein 8	mt-Atp8;ATP8;Mtatp8	tr|Q7JCZ0|Q7JCZ0_MOUSE ATP synthase protein 8 OS=Mus musculus GN=mt-Atp8 PE=1 SV=1;tr|A3R404|A3R404_MOUSE ATP synthase protein 8 OS=Mus musculus GN=ATP8 PE=3 SV=1;sp|P03930|ATP8_MOUSE ATP synthase protein 8 OS=Mus musculus GN=Mtatp8 PE=1 SV=1	8819900000	4664800000	3819500000	7333100000	8275700000	3682700000	8270200000	5034300000	3972400000	10775000000	1764000000	932950000	763900000	1466600000	1655100000	736550000	1654000000	1006900000	794470000	12320000000	13729000000	15329000000	11144000000	12623000000	12793000000	11716000000	11969000000	13564000000	4	4	4	46.3	46.3	46.3	7.7662	0	71.999	53873000000	269	4	4	4	4	4
419	A4FTZ0;Q8CB27	A4FTZ0;Q8CB27	Ubiquitin thioesterase OTU1	Yod1	tr|A4FTZ0|A4FTZ0_MOUSE YOD1 OTU deubiquitinating enzyme 1 homologue (S. cerevisiae) OS=Mus musculus GN=Yod1 PE=2 SV=1;sp|Q8CB27|OTU1_MOUSE Ubiquitin thioesterase OTU1 OS=Mus musculus GN=Yod1 PE=1 SV=1	8813400	2340200	3944800	28765000	9333900	13009000	20394000	15105000	11621000	6666300	518440	137660	232050	1692100	549050	765230	1199600	888520	683570	15776000	0	25147000	37716000	18843000	20843000	32919000	27476000	35420000	4	4	4	20.1	20.1	20.1	33.789	0	14.823	113330000	15	3	1	2	4	2
420	A4FU75;Q6WQJ1;S4R2M3	A4FU75;Q6WQJ1	Sn1-specific diacylglycerol lipase alpha	Dagla	tr|A4FU75|A4FU75_MOUSE Dagla protein (Fragment) OS=Mus musculus GN=Dagla PE=2 SV=1;sp|Q6WQJ1|DGLA_MOUSE Sn1-specific diacylglycerol lipase alpha OS=Mus musculus GN=Dagla PE=1 SV=2	1371900000	555060000	400620000	270930000	365950000	162030000	3680700000	2448500000	1320000000	207370000	26900000	10884000	7855400	5312400	7175500	3177000	72170000	48009000	25883000	2080800000	1762700000	1847900000	497020000	556600000	488210000	4024300000	3659500000	4345000000	33	33	33	34.8	34.8	34.8	115.24	0	323.31	10576000000	373	29	27	29	24	24
421	A4FUQ0;P60191	A4FUQ0;P60191	Regulating synaptic membrane exocytosis protein 4	Rims4	tr|A4FUQ0|A4FUQ0_MOUSE Rims4 protein (Fragment) OS=Mus musculus GN=Rims4 PE=2 SV=1;sp|P60191|RIMS4_MOUSE Regulating synaptic membrane exocytosis protein 4 OS=Mus musculus GN=Rims4 PE=2 SV=1	308060000	127370000	48137000	133360000	114040000	49509000	872800000	555080000	245070000	204450000	25672000	10614000	4011500	11114000	9503300	4125800	72733000	46256000	20422000	400470000	435960000	500460000	149870000	121120000	100420000	738410000	632570000	626070000	10	10	7	48.1	48.1	33.6	29.198	0	50.198	2453400000	66	10	7	4	9	9
422	A4FUS1;Q641N3;Q5CZY9;P14131	A4FUS1;Q641N3;Q5CZY9;P14131	40S ribosomal protein S16	Rps16	tr|A4FUS1|A4FUS1_MOUSE MCG123443 OS=Mus musculus GN=Rps16 PE=2 SV=1;tr|Q641N3|Q641N3_MOUSE Rps16 protein (Fragment) OS=Mus musculus GN=Rps16 PE=2 SV=1;tr|Q5CZY9|Q5CZY9_MOUSE Rps16 protein OS=Mus musculus GN=Rps16 PE=2 SV=1;sp|P14131|RS16_MOUSE 40S ribosoma	2826900000	1165400000	972090000	2305200000	2686500000	1701300000	1501400000	1115400000	678340000	1246000000	235580000	97119000	81007000	192100000	223870000	141770000	125110000	92952000	56528000	4059700000	3517900000	3080600000	2966600000	3680500000	3326600000	1956600000	1859800000	1627800000	10	10	10	54.1	54.1	54.1	16.445	0	105.47	14953000000	296	10	10	10	10	10
423	A4FUT4;Q9D035	A4FUT4;Q9D035	Sodium/potassium-transporting ATPase subunit beta-1-interacting protein 1	Nkain1	tr|A4FUT4|A4FUT4_MOUSE Nkain1 protein (Fragment) OS=Mus musculus GN=Nkain1 PE=2 SV=1;sp|Q9D035|NKAI1_MOUSE Sodium/potassium-transporting ATPase subunit beta-1-interacting protein 1 OS=Mus musculus GN=Nkain1 PE=1 SV=2	686720	0	0	19266000	2454900	0	3619600	0	0	2168900	57227	0	0	1605500	204580	0	301640	0	0	0	0	0	0	0	0	2597600	0	0	1	1	1	7.9	7.9	7.9	26.116	0.0038976	1.9403	26027000	1	1	0	0	1	1
424	Q8BJT1;A4FUW0;A4FUV9;Q8BFW4-2;Q8BFW4	Q8BJT1;A4FUW0;A4FUV9;Q8BFW4-2;Q8BFW4	Tripartite motif-containing protein 65	Trim65	tr|Q8BJT1|Q8BJT1_MOUSE Putative uncharacterized protein OS=Mus musculus GN=Trim65 PE=2 SV=1;tr|A4FUW0|A4FUW0_MOUSE Trim65 protein (Fragment) OS=Mus musculus GN=Trim65 PE=2 SV=1;tr|A4FUV9|A4FUV9_MOUSE Trim65 protein (Fragment) OS=Mus musculus GN=Trim65 PE=2	5215400	0	0	1531700	5222900	3243700	0	187240	0	1100100	372530	0	0	109410	373060	231690	0	13374	0	9125200	0	0	0	0	0	0	0	0	1	1	1	3.8	3.8	3.8	35.688	0.0086629	1.5383	15401000	2	1	0	0	1	1
425	A4PI81;Q8BYR5-2;E9Q835;S4R1C6;Q8BYR5-4;Q8BYR5-3;Q8BYR5;E9Q5C0;E9PVF7;Q8BYR5-5;A4PI82;F6SH36;Q8BYR5-6;A4PI83;A4PI84;A4PI80;Q8BYR5-7	A4PI81;Q8BYR5-2;E9Q835;S4R1C6;Q8BYR5-4;Q8BYR5-3;Q8BYR5;E9Q5C0;E9PVF7;Q8BYR5-5;A4PI82;F6SH36;Q8BYR5-6;A4PI83	Calcium-dependent secretion activator 2	Cadps2	tr|A4PI81|A4PI81_MOUSE Ca2+-dependent activator protein for secretion 2 isoform b OS=Mus musculus GN=Cadps2 PE=2 SV=1;sp|Q8BYR5-2|CAPS2_MOUSE Isoform 2 of Calcium-dependent secretion activator 2 OS=Mus musculus GN=Cadps2;tr|E9Q835|E9Q835_MOUSE Calcium-depe	3984400000	1596000000	1014600000	1039100000	1155200000	548150000	14040000000	7187400000	3820800000	419340000	48590000	19463000	12373000	12672000	14088000	6684700	171220000	87651000	46595000	6036600000	5583000000	5848100000	1745100000	1866100000	1843100000	11200000000	11225000000	10929000000	68	57	57	60	50.8	50.8	148.55	0	323.31	34386000000	663	62	59	48	54	55
426	A4QMQ0;Q9CZD5;D3YWL2;D3Z0H9	A4QMQ0;Q9CZD5	Translation initiation factor IF-3, mitochondrial	Mtif3	tr|A4QMQ0|A4QMQ0_MOUSE Mitochondrial translational initiation factor 3 OS=Mus musculus GN=Mtif3 PE=2 SV=1;sp|Q9CZD5|IF3M_MOUSE Translation initiation factor IF-3, mitochondrial OS=Mus musculus GN=Mtif3 PE=1 SV=1	9180800	0	2944200	29143000	37681000	33255000	20898000	14169000	2609300	8326700	510040	0	163570	1619100	2093400	1847500	1161000	787150	144960	21013000	0	0	24044000	39251000	39347000	14698000	26752000	0	4	4	4	20.3	20.3	20.3	31.739	0	8.9484	149880000	10	2	0	1	4	4
427	A5A4Z2;G3UZ30;A5A4Y9;A5A4Z1;A5A4Z0;Q8K1L5	A5A4Z2;G3UZ30;A5A4Y9;A5A4Z1;A5A4Z0;Q8K1L5	Protein phosphatase 1 regulatory subunit 11	Ppp1r11	tr|A5A4Z2|A5A4Z2_MOUSE TCTEX5 isoform 2 OS=Mus musculus GN=Ppp1r11 PE=2 SV=1;tr|G3UZ30|G3UZ30_MOUSE Protein phosphatase 1 regulatory subunit 11 (Fragment) OS=Mus musculus GN=Ppp1r11 PE=4 SV=2;tr|A5A4Y9|A5A4Y9_MOUSE Protein phosphatase 1 regulatory subunit	131390000	74797000	37072000	137040000	187800000	93289000	126780000	87116000	68091000	188680000	26279000	14959000	7414400	27407000	37560000	18658000	25357000	17423000	13618000	171710000	186830000	233520000	143030000	182250000	178340000	126770000	123450000	150230000	4	4	4	54.6	54.6	54.6	10.99	0	14.104	943380000	38	4	4	2	4	4
428	D3Z376;S4R217;D3Z119;D3Z118;A5A8K4;P97411-2;P97411;F7BG11;F6UY19;D3Z020	D3Z376;S4R217;D3Z119;D3Z118;A5A8K4;P97411-2;P97411	Islet cell autoantigen 1	Ica1	tr|D3Z376|D3Z376_MOUSE Islet cell autoantigen 1 (Fragment) OS=Mus musculus GN=Ica1 PE=4 SV=1;tr|S4R217|S4R217_MOUSE Islet cell autoantigen 1 OS=Mus musculus GN=Ica1 PE=4 SV=1;tr|D3Z119|D3Z119_MOUSE Islet cell autoantigen 1 OS=Mus musculus GN=Ica1 PE=4 SV=1	187730000	65745000	86520000	284250000	299410000	45250000	359050000	353390000	188970000	93516000	9386400	3287200	4326000	14212000	14971000	2262500	17953000	17669000	9448400	293630000	327140000	299320000	186820000	205760000	280870000	402270000	378380000	487070000	10	10	10	35.7	35.7	35.7	32.617	0	33.954	1870300000	32	8	6	6	7	6
429	Q8BPQ6;Q8BPQ4;E9PYJ2;E0CX45;F6TSJ9;E0CXR8;E0CZE2;E0CZ83;E0CY24;E0CXL4;B2RUK1;B7ZNY3;F6S7Z1;G3XA13;A5D6P2;Q99NH2-3;Q99NH2-2;Q99NH2;F6UGU7;Q99NH2-5;Q99NH2-4;E0CYB6;E0CXD3;Q4JJC0	Q8BPQ6;Q8BPQ4;E9PYJ2;E0CX45;F6TSJ9;E0CXR8;E0CZE2;E0CZ83;E0CY24;E0CXL4;B2RUK1;B7ZNY3;F6S7Z1;G3XA13;A5D6P2;Q99NH2-3;Q99NH2-2;Q99NH2;F6UGU7;Q99NH2-5;Q99NH2-4	Partitioning defective 3 homolog	Pard3	tr|Q8BPQ6|Q8BPQ6_MOUSE Putative uncharacterized protein OS=Mus musculus GN=Pard3 PE=2 SV=1;tr|Q8BPQ4|Q8BPQ4_MOUSE Putative uncharacterized protein OS=Mus musculus GN=Pard3 PE=2 SV=1;tr|E9PYJ2|E9PYJ2_MOUSE Partitioning defective 3 homolog OS=Mus musculus GN	3866100	841960	591620	12299000	10873000	2759500	4733000	8680900	2350800	1068100	87866	19135	13446	279520	247110	62715	107570	197290	53428	0	0	0	12585000	10241000	0	7893300	8919800	8051300	3	3	3	6.1	6.1	6.1	79.164	0.0004465	4.2326	46996000	5	1	1	1	2	3
430	A5D6P3;O35379;D3Z407;D3YYJ6;D3YZY1;Q3UDM1;E9Q1I5;Q8C7V6	A5D6P3;O35379;D3Z407;D3YYJ6;D3YZY1;Q3UDM1;E9Q1I5;Q8C7V6	Multidrug resistance-associated protein 1	Abcc1	tr|A5D6P3|A5D6P3_MOUSE ATP-binding cassette, sub-family C (CFTR/MRP), member 1 OS=Mus musculus GN=Abcc1 PE=2 SV=1;sp|O35379|MRP1_MOUSE Multidrug resistance-associated protein 1 OS=Mus musculus GN=Abcc1 PE=1 SV=1;tr|D3Z407|D3Z407_MOUSE Multidrug resistance-	4929500	4470300	2847000	2928100	5770200	4189800	3721600	3295400	1913200	415430	60115	54516	34720	35709	70369	51095	45385	40188	23332	0	12261000	0	0	0	0	0	0	0	2	2	2	1.8	1.8	1.8	171.18	0.006223	1.6603	34065000	4	1	2	2	1	2
431	J3QP81;A5D6Q8;B2RY22;E9Q6L0;Q3TPM6	J3QP81;A5D6Q8;B2RY22;E9Q6L0		Clasp1	tr|J3QP81|J3QP81_MOUSE CLIP-associating protein 1 OS=Mus musculus GN=Clasp1 PE=1 SV=1;tr|A5D6Q8|A5D6Q8_MOUSE Clasp1 protein OS=Mus musculus GN=Clasp1 PE=2 SV=1;tr|B2RY22|B2RY22_MOUSE Clasp1 protein OS=Mus musculus GN=Clasp1 PE=2 SV=1;tr|E9Q6L0|E9Q6L0_MOUSE	1744400	1193800	1880600	24965000	7864300	4283000	1424000	2041900	798590	466620	17620	12058	18996	252170	79437	43262	14384	20625	8066.6	0	0	0	0	0	0	0	0	2793600	53	1	0	42.2	1.5	0	160.92	1	-2	46196000	3	38	37	27	42	41
432	A5GZX3;Q9CPU0	A5GZX3;Q9CPU0	Lactoylglutathione lyase	Glo1	tr|A5GZX3|A5GZX3_MOUSE Lactoylglutathione lyase OS=Mus musculus GN=Glo1 PE=2 SV=1;sp|Q9CPU0|LGUL_MOUSE Lactoylglutathione lyase OS=Mus musculus GN=Glo1 PE=1 SV=3	3387700000	1475400000	1029000000	3718900000	2525900000	1267600000	4212700000	3414700000	2236500000	2115300000	307980000	134130000	93542000	338080000	229630000	115240000	382970000	310430000	203320000	4351800000	5475600000	4396800000	4747600000	4400000000	3869800000	6213100000	5932300000	5329100000	10	10	10	46.7	46.7	46.7	20.809	0	85.625	23268000000	342	10	10	8	10	9
433	Q148A0;A5LFV3;Q80TY4	Q148A0;A5LFV3;Q80TY4	Suppression of tumorigenicity 18 protein	St18	tr|Q148A0|Q148A0_MOUSE St18 protein OS=Mus musculus GN=St18 PE=2 SV=1;tr|A5LFV3|A5LFV3_MOUSE Neural zinc finger protein NZF-3 OS=Mus musculus GN=St18 PE=2 SV=1;sp|Q80TY4|ST18_MOUSE Suppression of tumorigenicity 18 protein OS=Mus musculus GN=St18 PE=2 SV=2	7551800	1370300	0	24998000	6912200	1265500	0	0	0	668230	119870	21751	0	396800	109720	20087	0	0	0	18096000	0	0	40168000	0	0	0	0	0	2	2	2	2.2	2.2	2.2	114.75	0.0038961	1.9313	42098000	2	2	1	0	2	2
434	A5X3G4;M0QW59;Q3UVC0;C4IXV3	A5X3G4;M0QW59;Q3UVC0	Kinase suppressor of Ras 2	Ksr2	tr|A5X3G4|A5X3G4_MOUSE Kinase suppressor of ras 2 OS=Mus musculus GN=Ksr2 PE=2 SV=1;tr|M0QW59|M0QW59_MOUSE Kinase suppressor of Ras 2 OS=Mus musculus GN=Ksr2 PE=4 SV=1;sp|Q3UVC0|KSR2_MOUSE Kinase suppressor of Ras 2 OS=Mus musculus GN=Ksr2 PE=2 SV=2	61405000	25966000	40410000	38969000	50744000	32290000	151910000	103810000	59724000	10870000	1180900	499350	777110	749400	975850	620960	2921400	1996400	1148500	77714000	103810000	163710000	81089000	82293000	75730000	129270000	162590000	98634000	17	17	15	21.9	21.9	20.1	107.2	0	46.817	565230000	43	10	10	9	8	10
435	A6H5Y3;Q8BUC4	A6H5Y3	Methionine synthase	Mtr	sp|A6H5Y3|METH_MOUSE Methionine synthase OS=Mus musculus GN=Mtr PE=2 SV=1	930620	1812800	1265500	5042300	1091100	1332100	13431000	18604000	11661000	745550	12576	24498	17101	68140	14744	18001	181500	251410	157590	0	0	0	0	0	0	27319000	24659000	20881000	6	6	6	5.3	5.3	5.3	139.07	0.00015218	4.7553	55171000	6	1	2	1	1	1
436	A6H5Z3;A6H5Z3-2;Q6PCN5;Q8C1X1;Q5DU10;E0CXR2;Q8C203;Q9D4R7;E0CY34;Q8K2N8	A6H5Z3;A6H5Z3-2;Q6PCN5	Exocyst complex component 6B	Exoc6b	sp|A6H5Z3|EXC6B_MOUSE Exocyst complex component 6B OS=Mus musculus GN=Exoc6b PE=2 SV=1;sp|A6H5Z3-2|EXC6B_MOUSE Isoform 2 of Exocyst complex component 6B OS=Mus musculus GN=Exoc6b;tr|Q6PCN5|Q6PCN5_MOUSE Exoc6b protein (Fragment) OS=Mus musculus GN=Exoc6b PE	266060000	104540000	58846000	242980000	438100000	115990000	386400000	394340000	339380000	44276000	5019900	1972400	1110300	4584500	8266000	2188600	7290500	7440400	6403500	309890000	391120000	376500000	387560000	349160000	379650000	553560000	600070000	597450000	27	27	26	38.1	38.1	37.2	94.128	0	102.76	2346600000	103	18	16	11	18	14
437	B7ZMT4;F6U6S4;F7DAC7;E0CX99;A6H603-3;A6H603-2;A6H603;E0CYZ6;A6H603-4	B7ZMT4;F6U6S4;F7DAC7;E0CX99;A6H603-3;A6H603-2;A6H603;E0CYZ6;A6H603-4	NACHT domain- and WD repeat-containing protein 1	Nwd1	tr|B7ZMT4|B7ZMT4_MOUSE Nwd1 protein OS=Mus musculus GN=Nwd1 PE=2 SV=1;tr|F6U6S4|F6U6S4_MOUSE NACHT and WD repeat domain-containing protein 1 (Fragment) OS=Mus musculus GN=Nwd1 PE=4 SV=1;tr|F7DAC7|F7DAC7_MOUSE NACHT and WD repeat domain-containing protein 1	12057000	7212100	3793800	9718000	10315000	12507000	66737000	83829000	34359000	3294900	165160	98796	51970	133120	141300	171330	914210	1148300	470670	33520000	30756000	0	17829000	20079000	19776000	80517000	120050000	82094000	15	15	15	16.2	16.2	16.2	135.5	0	14.892	240530000	22	4	4	1	4	4
438	A6H611;Q8BLL4	A6H611;Q8BLL4	Mitochondrial intermediate peptidase	Mipep	sp|A6H611|MIPEP_MOUSE Mitochondrial intermediate peptidase OS=Mus musculus GN=Mipep PE=2 SV=1;tr|Q8BLL4|Q8BLL4_MOUSE Putative uncharacterized protein OS=Mus musculus GN=Mipep PE=2 SV=1	144520000	86606000	51190000	187710000	214510000	89284000	195920000	132160000	99245000	26112000	3141800	1882700	1112800	4080700	4663300	1941000	4259200	2873000	2157500	236170000	298740000	249920000	282650000	293760000	261370000	292370000	257350000	215720000	17	17	17	30.4	30.4	30.4	80.851	0	46.479	1201100000	74	11	13	10	14	14
439	A6H624;Q9D0E3	A6H624;Q9D0E3	LysM and putative peptidoglycan-binding domain-containing protein 1	Lysmd1	tr|A6H624|A6H624_MOUSE LysM, putative peptidoglycan-binding, domain containing 1 OS=Mus musculus GN=Lysmd1 PE=2 SV=1;sp|Q9D0E3|LYSM1_MOUSE LysM and putative peptidoglycan-binding domain-containing protein 1 OS=Mus musculus GN=Lysmd1 PE=2 SV=1	72126000	95670000	21134000	86846000	40953000	8288000	89369000	75046000	37815000	35150000	4808400	6378000	1409000	5789800	2730200	552530	5957900	5003000	2521000	156830000	251120000	135920000	71416000	77400000	48629000	172210000	192660000	145960000	7	5	5	32.7	28.3	28.3	24.813	0	9.6887	527250000	33	6	6	4	5	6
440	A6H630;A6H630-2;A6H630-4;D6RG65;A6H630-3	A6H630;A6H630-2	Protein-glutamate O-methyltransferase	Armt1	sp|A6H630|CF211_MOUSE UPF0364 protein C6orf211 homolog OS=Mus musculus PE=2 SV=1;sp|A6H630-2|CF211_MOUSE Isoform 2 of UPF0364 protein C6orf211 homolog OS=Mus musculus	127940000	42689000	23300000	183240000	224410000	75936000	1310500000	1083100000	72707000	116430000	4738600	1581100	862960	6786500	8311400	2812400	48535000	40113000	2692900	456600000	467940000	336940000	484400000	354710000	397680000	739570000	673650000	625610000	15	15	15	41.7	41.7	41.7	50.548	0	73.459	3143700000	58	11	8	6	12	12
441	A6H644;Q8BG95;Q8BG95-2	A6H644;Q8BG95	Protein phosphatase 1 regulatory subunit;Protein phosphatase 1 regulatory subunit 12B	Ppp1r12b	tr|A6H644|A6H644_MOUSE Protein phosphatase 1 regulatory subunit 12 OS=Mus musculus GN=Ppp1r12b PE=1 SV=1;sp|Q8BG95|MYPT2_MOUSE Protein phosphatase 1 regulatory subunit 12B OS=Mus musculus GN=Ppp1r12b PE=1 SV=2	98717000	36785000	46644000	131780000	87848000	59408000	153190000	81471000	58494000	12167000	1592200	593300	752320	2125400	1416900	958190	2470800	1314000	943450	113460000	99935000	176320000	73232000	91006000	101030000	139080000	123220000	204670000	13	12	12	15.9	14.4	14.4	110.97	0	24.224	754330000	36	10	7	6	11	11
442	A6H659;Q3U1F9	A6H659;Q3U1F9	Phosphoprotein associated with glycosphingolipid-enriched microdomains 1	Pag1	tr|A6H659|A6H659_MOUSE Pag1 protein OS=Mus musculus GN=Pag1 PE=2 SV=1;sp|Q3U1F9|PHAG1_MOUSE Phosphoprotein associated with glycosphingolipid-enriched microdomains 1 OS=Mus musculus GN=Pag1 PE=1 SV=2	26832000	9055400	8892100	13842000	22268000	4864900	58248000	38346000	12769000	10269000	1412200	476600	468000	728520	1172000	256040	3065700	2018200	672060	27001000	22560000	31862000	20571000	23587000	0	37702000	35562000	22588000	4	4	4	11.9	11.9	11.9	46.549	0	6.3623	195120000	11	2	3	2	2	2
443	A6H663;Q9JLV1;Q3TAM9;Q9ER87	A6H663;Q9JLV1;Q3TAM9	BAG family molecular chaperone regulator 3	Bag3	tr|A6H663|A6H663_MOUSE BCL2-associated athanogene 3 OS=Mus musculus GN=Bag3 PE=2 SV=1;sp|Q9JLV1|BAG3_MOUSE BAG family molecular chaperone regulator 3 OS=Mus musculus GN=Bag3 PE=1 SV=2;tr|Q3TAM9|Q3TAM9_MOUSE Putative uncharacterized protein OS=Mus musculus	77908000	88540000	15518000	100750000	339780000	71903000	91075000	48482000	220490000	27037000	1997600	2270300	397900	2583400	8712300	1843700	2335200	1243100	5653500	164300000	200950000	240890000	173530000	198740000	254550000	146230000	224450000	200890000	12	12	12	29.1	29.1	29.1	61.858	0	18.946	1054400000	40	9	8	4	10	9
444	A6H669;Q8C1Z7	A6H669;Q8C1Z7	Bardet-Biedl syndrome 4 protein homolog	Bbs4	tr|A6H669|A6H669_MOUSE Bardet-Biedl syndrome 4 (Human) OS=Mus musculus GN=Bbs4 PE=2 SV=1;sp|Q8C1Z7|BBS4_MOUSE Bardet-Biedl syndrome 4 protein homolog OS=Mus musculus GN=Bbs4 PE=1 SV=1	0	4132800	0	0	0	0	13248000	0	0	599330	0	142510	0	0	0	0	456820	0	0	0	0	0	0	0	0	9506900	0	0	1	1	1	2.5	2.5	2.5	58.255	0.0017784	2.6011	17380000	1	0	1	0	0	0
445	A6H6A9;A6H6A9-2	A6H6A9;A6H6A9-2	Rab GTPase-activating protein 1-like	Rabgap1l	sp|A6H6A9|RBG1L_MOUSE Rab GTPase-activating protein 1-like OS=Mus musculus GN=Rabgap1l PE=1 SV=1;sp|A6H6A9-2|RBG1L_MOUSE Isoform 2 of Rab GTPase-activating protein 1-like OS=Mus musculus GN=Rabgap1l	115580000	35940000	26344000	95781000	107710000	51605000	200820000	147900000	121920000	20536000	2626900	816820	598730	2176800	2448000	1172800	4564000	3361400	2770800	209070000	148960000	249810000	157430000	192750000	173120000	263850000	298370000	261550000	19	17	14	25.9	23.9	21.1	92.403	0	21.454	903600000	57	12	12	7	13	10
446	A6H6A9-3;Q9CRQ7	A6H6A9-3;Q9CRQ7	Rab GTPase-activating protein 1-like	Rabgap1l	sp|A6H6A9-3|RBG1L_MOUSE Isoform 3 of Rab GTPase-activating protein 1-like OS=Mus musculus GN=Rabgap1l;tr|Q9CRQ7|Q9CRQ7_MOUSE Putative uncharacterized protein (Fragment) OS=Mus musculus GN=Rabgap1l PE=2 SV=1	84547000	33122000	11030000	71567000	32446000	18219000	137370000	85738000	33713000	15387000	2562000	1003700	334240	2168700	983220	552080	4162900	2598100	1021600	93140000	98708000	60899000	43196000	50522000	46717000	126970000	100670000	72858000	12	7	7	34.3	21.1	21.1	42.753	0	11.503	507760000	26	10	8	4	7	7
447	A6H6H4;Q6ZWY8	A6H6H4;Q6ZWY8	Thymosin beta-10	Tmsb10	tr|A6H6H4|A6H6H4_MOUSE MCG125727 OS=Mus musculus GN=Tmsb10 PE=2 SV=1;sp|Q6ZWY8|TYB10_MOUSE Thymosin beta-10 OS=Mus musculus GN=Tmsb10 PE=2 SV=3	19996000	6950100	5829000	31335000	26386000	29599000	9608600	8990400	12927000	37905000	4999100	1737500	1457300	7833800	6596500	7399700	2402200	2247600	3231800	0	0	0	0	0	0	0	0	24070000	1	1	1	31.8	31.8	31.8	5.0256	0.0017796	2.6087	151620000	4	1	1	1	1	1
448	Q9CYM1;G5E876;Q80U90;Q8CFQ0;A6H6S0	Q9CYM1;G5E876;Q80U90;Q8CFQ0;A6H6S0		Herc3;mKIAA0032	tr|Q9CYM1|Q9CYM1_MOUSE Putative uncharacterized protein OS=Mus musculus GN=Herc3 PE=2 SV=1;tr|G5E876|G5E876_MOUSE Hect domain and RLD 3, isoform CRA_a OS=Mus musculus GN=Herc3 PE=4 SV=1;tr|Q80U90|Q80U90_MOUSE MKIAA0032 protein (Fragment) OS=Mus musculus GN	62047000	34938000	61442000	66183000	49294000	80380000	11190000	11434000	36769000	9849500	1477300	831860	1462900	1575800	1173700	1913800	266420	272250	875460	97310000	97673000	153520000	100650000	85702000	149820000	54761000	136540000	140050000	4	4	4	5.5	5.5	5.5	101.43	0.00085421	3.2846	413680000	9	4	3	3	3	4
449	A6H6S8;Q8CI61	A6H6S8;Q8CI61	BAG family molecular chaperone regulator 4	Bag4	tr|A6H6S8|A6H6S8_MOUSE BCL2-associated athanogene 4 OS=Mus musculus GN=Bag4 PE=2 SV=1;sp|Q8CI61|BAG4_MOUSE BAG family molecular chaperone regulator 4 OS=Mus musculus GN=Bag4 PE=1 SV=2	49506000	15528000	5265700	126800000	58511000	61162000	9721400	16654000	1985700	21571000	3094100	970510	329100	7924700	3657000	3822600	607590	1040900	124110	59551000	49115000	33252000	49052000	56580000	110540000	31567000	36532000	25662000	6	6	6	15.8	15.8	15.8	49.094	0	13.03	345130000	17	6	4	3	6	4
450	A6H8H2;A6H8H2-2;E9Q449;Q3U2Y9	A6H8H2;A6H8H2-2;E9Q449	DENN domain-containing protein 4C	Dennd4c	sp|A6H8H2|DEN4C_MOUSE DENN domain-containing protein 4C OS=Mus musculus GN=Dennd4c PE=1 SV=1;sp|A6H8H2-2|DEN4C_MOUSE Isoform 2 of DENN domain-containing protein 4C OS=Mus musculus GN=Dennd4c;tr|E9Q449|E9Q449_MOUSE DENN domain-containing protein 4C OS=Mus m	70793000	20452000	13527000	69716000	31055000	32572000	102240000	65455000	48015000	4493300	700920	202500	133930	690250	307470	322500	1012300	648070	475400	78494000	83597000	80370000	64309000	68518000	97820000	101440000	141730000	106490000	11	11	11	7.6	7.6	7.6	211.46	0	21.2	453820000	36	7	5	2	9	4
451	A6H8H5;Q80X33;Q03717	A6H8H5;Q80X33;Q03717	Potassium voltage-gated channel subfamily B member 2;Potassium voltage-gated channel subfamily B member 1	Kcnb2;Kcnb1	sp|A6H8H5|KCNB2_MOUSE Potassium voltage-gated channel subfamily B member 2 OS=Mus musculus GN=Kcnb2 PE=2 SV=2;tr|Q80X33|Q80X33_MOUSE Kcnb1 protein OS=Mus musculus GN=Kcnb1 PE=2 SV=1;sp|Q03717|KCNB1_MOUSE Potassium voltage-gated channel subfamily B member 1	6025300	2188200	0	20494000	4038000	0	8615100	5295500	0	1110900	143460	52100	0	487960	96142	0	205120	126080	0	0	0	0	36738000	0	0	0	0	0	2	2	2	2.4	2.4	2.4	102.33	0	5.3467	46656000	5	1	1	0	2	1
452	A6MDD2;Q6NVE2;Q5DTQ3;Q60673;Q925J6;Q925J7;Q3UTI6;Q6P3E6	A6MDD2;Q6NVE2;Q5DTQ3;Q60673;Q925J6;Q925J7	Receptor-type tyrosine-protein phosphatase-like N	Ptprn	tr|A6MDD2|A6MDD2_MOUSE Protein tyrosine phosphatase receptor type N OS=Mus musculus GN=Ptprn PE=2 SV=1;tr|Q6NVE2|Q6NVE2_MOUSE Protein tyrosine phosphatase, receptor type, N (Fragment) OS=Mus musculus GN=Ptprn PE=2 SV=1;tr|Q5DTQ3|Q5DTQ3_MOUSE MKIAA4064 prot	26190000	13951000	3419500	85749000	106730000	59276000	17646000	15268000	8050100	7820500	609060	324450	79524	1994200	2482200	1378500	410370	355060	187210	40046000	59137000	0	104590000	132730000	89057000	32076000	36853000	31681000	13	12	12	19.8	18.3	18.3	106.02	0	46.59	336280000	18	7	7	2	9	10
453	Q7TPU7;E9PV80;A6P3E3;Q61026;Q8BN74;Q8CBM5	Q7TPU7;E9PV80;A6P3E3;Q61026;Q8BN74	Nuclear receptor coactivator 2	Ncoa2	tr|Q7TPU7|Q7TPU7_MOUSE Ncoa2 protein OS=Mus musculus GN=Ncoa2 PE=2 SV=1;tr|E9PV80|E9PV80_MOUSE Nuclear receptor coactivator 2 OS=Mus musculus GN=Ncoa2 PE=1 SV=1;tr|A6P3E3|A6P3E3_MOUSE Glucocorticoid receptor interacting protein 1 OS=Mus musculus GN=Ncoa2 P	0	2363400	2679700	31650000	13847000	3490700	8072200	4841100	2197100	1133500	0	38744	43930	518860	227010	57224	132330	79362	36018	0	0	0	0	10805000	0	0	0	0	3	3	3	2.9	2.9	2.9	151.38	0.002306	2.4696	69142000	2	0	1	1	2	3
454	A6PW47;Q99K74-2;Q99K74;Q99K74-3	A6PW47;Q99K74-2;Q99K74;Q99K74-3	Mediator of RNA polymerase II transcription subunit 24	Med24	tr|A6PW47|A6PW47_MOUSE Mediator of RNA polymerase II transcription subunit 24 OS=Mus musculus GN=Med24 PE=1 SV=1;sp|Q99K74-2|MED24_MOUSE Isoform 2 of Mediator of RNA polymerase II transcription subunit 24 OS=Mus musculus GN=Med24;sp|Q99K74|MED24_MOUSE Medi	33532000	19273000	16337000	118660000	48061000	48628000	9727600	6075100	1858800	5395600	598780	344160	291730	2119000	858230	868360	173710	108480	33192	50746000	67327000	54077000	110040000	56470000	61412000	21733000	12803000	26394000	11	11	11	18	18	18	111.86	0	35.714	302160000	28	7	5	4	10	7
455	A6PWP3;Q7TNI6;Q923U0;Q8BZR6;Q923U0-3	A6PWP3;Q7TNI6;Q923U0;Q8BZR6;Q923U0-3	TOM1-like protein 1	Tom1l1	tr|A6PWP3|A6PWP3_MOUSE TOM1-like protein 1 (Fragment) OS=Mus musculus GN=Tom1l1 PE=4 SV=1;tr|Q7TNI6|Q7TNI6_MOUSE Jerry protein OS=Mus musculus GN=Tom1l1 PE=2 SV=1;sp|Q923U0|TM1L1_MOUSE TOM1-like protein 1 OS=Mus musculus GN=Tom1l1 PE=1 SV=1;tr|Q8BZR6|Q8BZR	36955000	9608800	1499400	4937700	2197600	0	110900000	69584000	31345000	26703000	3695500	960880	149940	493770	219760	0	11090000	6958400	3134500	30374000	28736000	27421000	16588000	0	0	63881000	94792000	54429000	7	7	7	37.2	37.2	37.2	21.564	0	7.7173	267030000	18	5	4	2	2	1
456	B2RSI0;A6X8Z5	B2RSI0;A6X8Z5	Rho GTPase-activating protein 31	Arhgap31	tr|B2RSI0|B2RSI0_MOUSE CDC42 GTPase-activating protein OS=Mus musculus GN=Arhgap31 PE=2 SV=1;sp|A6X8Z5|RHG31_MOUSE Rho GTPase-activating protein 31 OS=Mus musculus GN=Arhgap31 PE=1 SV=1	32020000	12401000	5314300	10215000	15568000	3421100	76315000	41696000	18617000	2694600	400250	155010	66429	127680	194590	42763	953940	521200	232710	45438000	33936000	31703000	14724000	14262000	17222000	83705000	87263000	31637000	8	8	8	7.2	7.2	7.2	155.27	0	26.065	215570000	17	8	5	3	5	4
457	A6X919;A6X919-2;A6X919-3	A6X919;A6X919-2	Probable C-mannosyltransferase DPY19L1	Dpy19l1	sp|A6X919|D19L1_MOUSE Probable C-mannosyltransferase DPY19L1 OS=Mus musculus GN=Dpy19l1 PE=2 SV=1;sp|A6X919-2|D19L1_MOUSE Isoform 2 of Probable C-mannosyltransferase DPY19L1 OS=Mus musculus GN=Dpy19l1	33209000	12531000	8619200	181820000	134350000	26451000	53745000	9441300	7829600	13764000	976720	368570	253510	5347600	3951400	777970	1580700	277690	230280	80539000	61781000	58013000	176760000	134950000	143820000	75477000	55780000	43879000	9	9	7	13.8	13.8	11.3	84.186	0	8.5683	467990000	24	5	3	3	8	5
458	A6X940	A6X940		Fermt2	tr|A6X940|A6X940_MOUSE Fermitin family homolog 2 (Fragment) OS=Mus musculus GN=Fermt2 PE=4 SV=1	0	5750300	0	10687000	19084000	7105000	31472000	32425000	9200700	8901800	0	442330	0	822060	1468000	546540	2420900	2494300	707750	0	0	0	0	0	0	0	0	25409000	9	1	1	29.8	4.7	4.7	28.911	0.0068294	1.6149	115720000	5	6	6	3	8	7
459	A7E1Z5;E3VWA1;D3Z7G8	A7E1Z5;E3VWA1	Anion exchange protein	Slc4a4	tr|A7E1Z5|A7E1Z5_MOUSE Electrogenic Na-bicarbonate cotransporter splice variant NBCe1-E OS=Mus musculus GN=Slc4a4 PE=1 SV=1;tr|E3VWA1|E3VWA1_MOUSE Electrogenic sodium bicarbonate cotransporter NBCe1 variant D OS=Mus musculus GN=Slc4a4 PE=2 SV=1	219400000	49749000	20516000	350190000	126620000	85501000	288510000	274160000	154700000	37365000	5223900	1184500	488490	8337700	3014700	2035700	6869200	6527700	3683300	266080000	126560000	85733000	244630000	166750000	186190000	484440000	314500000	352660000	36	3	1	37.9	3.7	1.2	120.46	0	58.482	1569300000	52	34	33	33	33	33
460	A7ISP9;F8WJ93;Q3UMY5-4;Q3UMY5-2;Q3UMY5-3;Q3UMY5;Q3TGL8	A7ISP9;F8WJ93;Q3UMY5-4;Q3UMY5-2;Q3UMY5-3;Q3UMY5	Echinoderm microtubule-associated protein-like 4	Eml4	tr|A7ISP9|A7ISP9_MOUSE EMAP-like protein 4 OS=Mus musculus GN=Eml4 PE=2 SV=1;tr|F8WJ93|F8WJ93_MOUSE Echinoderm microtubule-associated protein-like 4 OS=Mus musculus GN=Eml4 PE=1 SV=1;sp|Q3UMY5-4|EMAL4_MOUSE Isoform 4 of Echinoderm microtubule-associated pr	92977000	32536000	19772000	95569000	82592000	36333000	129880000	53708000	44540000	10314000	1631200	570810	346880	1676600	1449000	637420	2278700	942250	781410	111340000	93378000	72585000	60436000	41799000	138290000	116210000	87933000	69518000	13	12	12	17.3	16.5	16.5	108.71	0	11.61	587910000	28	9	8	4	9	9
461	A7MD55;Q5NCH9	A7MD55;Q5NCH9	Metabotropic glutamate receptor 6	Grm6	tr|A7MD55|A7MD55_MOUSE Grm6 protein (Fragment) OS=Mus musculus GN=Grm6 PE=2 SV=1;sp|Q5NCH9|GRM6_MOUSE Metabotropic glutamate receptor 6 OS=Mus musculus GN=Grm6 PE=1 SV=1	0	1636300	15095000	0	0	0	0	0	0	440300	0	43061	397230	0	0	0	0	0	0	0	0	48616000	0	0	0	0	0	0	2	1	1	2.1	1.1	1.1	68.55	0.0086596	1.535	16731000	3	2	2	2	1	1
462	A7VJ98;Q9CQI3;Q80X87;D3YY93;D3Z2F6;D3YY16;A7VJA4;Q9ERL7	A7VJ98;Q9CQI3;Q80X87	Glia maturation factor beta	Gmfb	tr|A7VJ98|A7VJ98_MOUSE Glia maturation factor beta OS=Mus musculus GN=Gmfb PE=2 SV=1;sp|Q9CQI3|GMFB_MOUSE Glia maturation factor beta OS=Mus musculus GN=Gmfb PE=1 SV=3;tr|Q80X87|Q80X87_MOUSE Glia maturation factor, beta OS=Mus musculus GN=Gmfb PE=2 SV=1	852320000	336510000	156570000	608790000	587740000	319420000	1588000000	813340000	498640000	576140000	85232000	33651000	15657000	60879000	58774000	31942000	158800000	81334000	49864000	850110000	913550000	895920000	675870000	595140000	627300000	1065000000	1280200000	990430000	7	7	7	54.2	54.2	54.2	16.722	0	91.15	5761400000	97	7	7	6	7	6
463	A7VK13;Q91V57;D6RCX8;A7VK14;A7VK12;Q91V57-3;Q91V57-2;B2FDI2	A7VK13;Q91V57;D6RCX8;A7VK14;A7VK12;Q91V57-3;Q91V57-2	N-chimaerin	Chn1	tr|A7VK13|A7VK13_MOUSE Alpha2-chimerin OS=Mus musculus GN=Chn1 PE=2 SV=1;sp|Q91V57|CHIN_MOUSE N-chimaerin OS=Mus musculus GN=Chn1 PE=1 SV=2;tr|D6RCX8|D6RCX8_MOUSE N-chimaerin OS=Mus musculus GN=Chn1 PE=4 SV=1;tr|A7VK14|A7VK14_MOUSE Alpha3-chimerin OS=Mus m	13417000	16649000	8887100	15347000	23602000	10183000	50188000	29597000	22167000	6130200	432820	537070	286680	495060	761350	328480	1619000	954740	715060	18805000	36627000	53059000	20928000	33462000	34144000	30141000	31835000	51824000	6	5	5	20.7	18.5	18.5	46.555	0	6.3321	190040000	10	5	5	2	3	4
464	Q3TMT4;Q3THE7;A7VL18;Q9JLJ2;Q3UDG0;Q3U367;Q3V1N7;Q3TG52;Q9CRH9	Q3TMT4;Q3THE7;A7VL18;Q9JLJ2;Q3UDG0;Q3U367;Q3V1N7;Q3TG52	4-trimethylaminobutyraldehyde dehydrogenase	Aldh9a1	tr|Q3TMT4|Q3TMT4_MOUSE Putative uncharacterized protein OS=Mus musculus GN=Aldh9a1 PE=2 SV=1;tr|Q3THE7|Q3THE7_MOUSE Putative uncharacterized protein OS=Mus musculus GN=Aldh9a1 PE=2 SV=1;tr|A7VL18|A7VL18_MOUSE Gamma-aminobutyraldehyde dehydrogenase OS=Mus m	1661000000	780110000	453940000	1528700000	1678300000	740590000	2045200000	1439700000	840260000	385090000	57274000	26900000	15653000	52712000	57873000	25538000	70523000	49644000	28975000	2288000000	2166500000	1781300000	2127400000	2387500000	2122200000	2751400000	2836100000	2381400000	25	25	25	58.5	58.5	58.5	53.529	0	172.15	11168000000	244	20	21	15	22	20
465	A7VMV2;Q99KP3;Q9D221	A7VMV2;Q99KP3	Lambda-crystallin homolog	Cryl1	tr|A7VMV2|A7VMV2_MOUSE Crystallin, lamda 1, isoform CRA_a OS=Mus musculus GN=Cryl1 PE=2 SV=1;sp|Q99KP3|CRYL1_MOUSE Lambda-crystallin homolog OS=Mus musculus GN=Cryl1 PE=2 SV=3	252560000	108680000	69924000	195830000	240730000	160570000	405460000	315950000	204180000	97694000	12628000	5434100	3496200	9791400	12037000	8028300	20273000	15798000	10209000	303780000	405960000	450840000	303510000	294270000	307190000	452540000	448650000	490740000	16	16	16	76.2	76.2	76.2	35.208	0	83.403	1953900000	84	11	11	6	11	12
466	Q6LD55;A7YL62;P09813	Q6LD55;A7YL62;P09813	Apolipoprotein A-II;Proapolipoprotein A-II	Apoa2	tr|Q6LD55|Q6LD55_MOUSE APOAII OS=Mus musculus GN=Apoa2 PE=2 SV=1;tr|A7YL62|A7YL62_MOUSE Apolipoprotein A-II OS=Mus musculus GN=Apoa2 PE=4 SV=1;sp|P09813|APOA2_MOUSE Apolipoprotein A-II OS=Mus musculus GN=Apoa2 PE=1 SV=2	40429000	8513900	0	0	15320000	6133600	31147000	26828000	9254100	22938000	6738200	1419000	0	0	2553300	1022300	5191100	4471400	1542300	44960000	31159000	0	0	0	0	20073000	32103000	0	1	1	1	9.8	9.8	9.8	11.319	0.00085702	3.3577	137630000	9	1	1	0	0	1
467	A7YQ68;Q80Y24	A7YQ68;Q80Y24	Prickle-like protein 2	Prickle2	tr|A7YQ68|A7YQ68_MOUSE Prickle-like 2 (Drosophila) OS=Mus musculus GN=Prickle2 PE=1 SV=1;sp|Q80Y24|PRIC2_MOUSE Prickle-like protein 2 OS=Mus musculus GN=Prickle2 PE=1 SV=3	5433300	3297300	0	26246000	0	0	9426800	0	6330600	994780	106540	64654	0	514620	0	0	184840	0	124130	0	0	0	24234000	0	0	0	0	0	1	1	1	1.6	1.6	1.6	102.23	0.0017808	2.6211	50734000	2	1	1	0	1	0
468	A8C1T7;Q91XD7	A8C1T7;Q91XD7	Cysteine-rich with EGF-like domain protein 1	Creld1	tr|A8C1T7|A8C1T7_MOUSE Cysteine-rich with EGF-like domains 1 OS=Mus musculus GN=Creld1 PE=2 SV=1;sp|Q91XD7|CREL1_MOUSE Cysteine-rich with EGF-like domain protein 1 OS=Mus musculus GN=Creld1 PE=2 SV=1	199740000	29763000	27491000	274620000	237630000	69573000	406070000	144570000	29931000	61712000	8684300	1294000	1195200	11940000	10332000	3024900	17655000	6285500	1301300	266820000	150350000	147300000	334600000	288110000	213180000	277100000	205830000	138060000	9	9	9	26.4	26.4	26.4	45.717	0	50.107	1419400000	45	5	4	4	8	7
469	A8C1U1;Q80XR4;Q545L1;Q3TXC6;Q3TVZ0;Q3THL4;Q3U364;Q9QY33;Q8BPU2	A8C1U1;Q80XR4;Q545L1;Q3TXC6;Q3TVZ0;Q3THL4;Q3U364;Q9QY33;Q8BPU2	Tetraspanin;Tetraspanin-3	Tspan3	tr|A8C1U1|A8C1U1_MOUSE H41D4 protein (Fragment) OS=Mus musculus GN=Tspan3 PE=2 SV=1;tr|Q80XR4|Q80XR4_MOUSE Tetraspanin 3 OS=Mus musculus GN=Tspan3 PE=2 SV=1;tr|Q545L1|Q545L1_MOUSE Tetraspanin OS=Mus musculus GN=Tspan3 PE=2 SV=1;tr|Q3TXC6|Q3TXC6_MOUSE Putat	24094000	3774100	0	12211000	24246000	0	28613000	12046000	0	11665000	2677100	419350	0	1356800	2694000	0	3179200	1338500	0	26705000	0	0	0	15514000	0	0	0	0	2	2	2	9.2	9.2	9.2	27.599	0.0063371	1.6408	104980000	3	2	1	0	2	2
470	A8CVP4;A8CVP1;Q4ZJB3;E9QP62;Q99JW4;Q9D7B2	A8CVP4;A8CVP1;Q4ZJB3;E9QP62;Q99JW4;Q9D7B2	LIM and senescent cell antigen-like-containing domain protein 1	Lims1	tr|A8CVP4|A8CVP4_MOUSE LIM and senescent cell antigen-like domains 1 isoform B OS=Mus musculus GN=Lims1 PE=2 SV=1;tr|A8CVP1|A8CVP1_MOUSE LIM and senescent cell antigen-like domains 1 isoform D OS=Mus musculus GN=Lims1 PE=2 SV=1;tr|Q4ZJB3|Q4ZJB3_MOUSE Lims	106190000	42212000	19295000	114260000	102920000	29027000	290920000	234710000	81193000	53722000	5589100	2221700	1015500	6013500	5416800	1527700	15312000	12353000	4273300	229370000	155640000	102500000	151460000	109100000	97126000	306320000	282630000	258680000	10	10	8	36.9	36.9	30.8	37.241	0	21.699	1020700000	54	7	8	4	10	10
471	A8DUK7;A8DUK4;A8DUQ5;A8DUK2;A8DUQ1;A8DUN2;A8DUL2;A8DUL0;A8DUM2;E9Q223;A8DUL7;A8DUP7;A8DUK0;P02088;B1Q450;A8DUP3;A8DUL5;A8DUP5;Q54AH9;Q549D9;A8DV41;P02089;Q61650;CON__Q3SX09;Q61348;CON__P02070;P02104	A8DUK7;A8DUK4;A8DUQ5;A8DUK2;A8DUQ1;A8DUN2;A8DUL2;A8DUL0;A8DUM2;E9Q223;A8DUL7;A8DUP7;A8DUK0;P02088;B1Q450;A8DUP3;A8DUL5	Hemoglobin subunit beta-1	Hbbt1;Hbb-bs;Hbb-b1;HBB1	tr|A8DUK7|A8DUK7_MOUSE Beta-globin OS=Mus musculus GN=Hbbt1 PE=3 SV=1;tr|A8DUK4|A8DUK4_MOUSE Beta-globin OS=Mus musculus GN=Hbbt1 PE=3 SV=1;tr|A8DUQ5|A8DUQ5_MOUSE Beta-globin OS=Mus musculus GN=Hbbt1 PE=3 SV=1;tr|A8DUK2|A8DUK2_MOUSE Beta-globin OS=Mus musc	88936000000	38932000000	34413000000	70191000000	61850000000	42636000000	55265000000	46134000000	35463000000	43075000000	8085100000	3539200000	3128500000	6381000000	5622700000	3876000000	5024100000	4194000000	3223900000	100910000000	101250000000	119710000000	67548000000	72969000000	92558000000	67854000000	71262000000	81937000000	16	16	1	84.4	84.4	11.6	15.721	0	323.31	473820000000	3403	14	14	12	16	16
472	A8DUP0	A8DUP0		Hbbt1	tr|A8DUP0|A8DUP0_MOUSE Beta-globin OS=Mus musculus GN=Hbbt1 PE=3 SV=1	90964000	28325000	0	74524000	42441000	0	88033000	80311000	47768000	41124000	8269500	2575000	0	6774900	3858300	0	8003000	7301000	4342500	0	0	0	0	0	0	0	0	88941000	13	1	0	78.2	5.4	0	15.646	1	-2	452370000	5	12	12	9	13	13
473	A8IK50;P12660;Q8CFD2	A8IK50;P12660	Purkinje cell protein 2	Pcp2	tr|A8IK50|A8IK50_MOUSE Purkinje cell protein 2 OS=Mus musculus GN=Pcp2 PE=2 SV=1;sp|P12660|PCP2_MOUSE Purkinje cell protein 2 OS=Mus musculus GN=Pcp2 PE=2 SV=2	1123300000	517310000	590570000	731450000	531220000	371640000	1333700000	863100000	658630000	1120100000	187210000	86219000	98429000	121910000	88537000	61940000	222280000	143850000	109770000	1114400000	1568900000	2191500000	721600000	602370000	742670000	930330000	1061800000	1501000000	6	6	6	70.6	70.6	70.6	14.784	0	116.35	6720900000	125	5	5	4	5	5
474	A8IP69;P61982	A8IP69;P61982	14-3-3 protein gamma;14-3-3 protein gamma, N-terminally processed	Ywhag	tr|A8IP69|A8IP69_MOUSE 14-3-3 protein gamma subtype OS=Mus musculus GN=Ywhag PE=2 SV=1;sp|P61982|1433G_MOUSE 14-3-3 protein gamma OS=Mus musculus GN=Ywhag PE=1 SV=2	20596000000	4127400000	3689700000	9992500000	8966600000	8213100000	23120000000	13146000000	7008000000	5492200000	1144200000	229300000	204980000	555140000	498140000	456280000	1284500000	730350000	389330000	16930000000	14445000000	9418100000	13078000000	12833000000	13636000000	22122000000	15444000000	14315000000	24	20	17	84.6	81.8	75.3	28.302	0	323.31	98860000000	574	21	20	17	20	19
475	A8Y5J3;Q9CWS4;D6RH69	A8Y5J3;Q9CWS4;D6RH69	Integrator complex subunit 11	Cpsf3l	tr|A8Y5J3|A8Y5J3_MOUSE Integrator complex subunit 11 OS=Mus musculus GN=Cpsf3l PE=4 SV=1;sp|Q9CWS4|INT11_MOUSE Integrator complex subunit 11 OS=Mus musculus GN=Cpsf3l PE=2 SV=1;tr|D6RH69|D6RH69_MOUSE Integrator complex subunit 11 OS=Mus musculus GN=Cpsf3l	9324500	15147000	2572200	47706000	24367000	55293000	3179200	1011600	299390	4540000	266420	432760	73490	1363000	696190	1579800	90835	28903	8554	45349000	45291000	0	49975000	78911000	96002000	0	0	0	6	6	6	11.2	11.2	11.2	65.42	0.00015249	4.792	158900000	11	2	3	2	3	3
476	A8Y5N8;Q91WB4	A8Y5N8;Q91WB4	Pleckstrin homology domain-containing family F member 2	Plekhf2	tr|A8Y5N8|A8Y5N8_MOUSE Pleckstrin homology domain-containing family F member 2 (Fragment) OS=Mus musculus GN=Plekhf2 PE=4 SV=1;sp|Q91WB4|PKHF2_MOUSE Pleckstrin homology domain-containing family F member 2 OS=Mus musculus GN=Plekhf2 PE=1 SV=1	17756000	1806400	0	6468500	9555300	7191500	11829000	0	6002700	4329200	1268300	129030	0	462030	682520	513680	844940	0	428770	0	0	0	0	8820600	0	10649000	0	12350000	3	3	3	19.3	19.3	19.3	22.106	0.0035294	1.9995	60609000	6	2	1	0	2	2
477	A8Y5P1;Q3TDB6;Q8K211	A8Y5P1;Q3TDB6;Q8K211	High affinity copper uptake protein 1	Slc31a1	tr|A8Y5P1|A8Y5P1_MOUSE High affinity copper uptake protein 1 OS=Mus musculus GN=Slc31a1 PE=4 SV=1;tr|Q3TDB6|Q3TDB6_MOUSE Putative uncharacterized protein OS=Mus musculus GN=Slc31a1 PE=2 SV=1;sp|Q8K211|COPT1_MOUSE High affinity copper uptake protein 1 OS=Mu	0	5056800	0	8555700	5173400	0	30822000	9078500	6930600	32809000	0	2528400	0	4277900	2586700	0	15411000	4539300	3465300	0	0	0	0	0	0	0	0	14098000	1	1	1	14.6	14.6	14.6	14.486	0.0001537	4.9666	65617000	3	0	1	0	1	1
478	A8Y5T6;Q8CFI5;Q3U4M2;A2AVQ7	A8Y5T6;Q8CFI5;Q3U4M2	Probable proline--tRNA ligase, mitochondrial	Pars2	tr|A8Y5T6|A8Y5T6_MOUSE Probable proline--tRNA ligase, mitochondrial OS=Mus musculus GN=Pars2 PE=3 SV=1;sp|Q8CFI5|SYPM_MOUSE Probable proline--tRNA ligase, mitochondrial OS=Mus musculus GN=Pars2 PE=2 SV=2;tr|Q3U4M2|Q3U4M2_MOUSE Putative uncharacterized prot	71802000	36588000	29930000	156170000	166180000	90646000	124500000	81502000	38975000	25687000	2316200	1180300	965500	5037800	5360600	2924100	4016100	2629100	1257300	88471000	118220000	140540000	185380000	137670000	176150000	131040000	123970000	178350000	15	15	15	38.4	38.4	38.4	57.735	0	38.412	796290000	55	9	10	6	13	12
479	A9C437;Q9R0A1;Q3TBI1;D6RFS3	A9C437;Q9R0A1;Q3TBI1	Chloride channel protein;Chloride channel protein 2	Clcn2	tr|A9C437|A9C437_MOUSE Chloride channel protein 2 OS=Mus musculus GN=Clcn2 PE=4 SV=1;sp|Q9R0A1|CLCN2_MOUSE Chloride channel protein 2 OS=Mus musculus GN=Clcn2 PE=2 SV=2;tr|Q3TBI1|Q3TBI1_MOUSE Putative uncharacterized protein (Fragment) OS=Mus musculus GN=C	184940000	59761000	41132000	92974000	97953000	41041000	290550000	179020000	101200000	32017000	5439400	1757700	1209800	2734500	2881000	1207100	8545600	5265300	2976500	171100000	185670000	151250000	111870000	129610000	89665000	290720000	244280000	271300000	14	14	14	20.3	20.3	20.3	97.697	0	167.95	1088600000	67	13	9	7	10	9
480	A9CLV6;Q9QZI8;E9Q553;E9PY81;Q8C5F9	A9CLV6;Q9QZI8;E9Q553;E9PY81	Serine incorporator 1	Serinc1	tr|A9CLV6|A9CLV6_MOUSE Axotomy induced glycoprotein 2 OS=Mus musculus GN=Serinc1 PE=2 SV=1;sp|Q9QZI8|SERC1_MOUSE Serine incorporator 1 OS=Mus musculus GN=Serinc1 PE=1 SV=1;tr|E9Q553|E9Q553_MOUSE Serine incorporator 1 OS=Mus musculus GN=Serinc1 PE=4 SV=1;tr	142490000	62575000	43959000	131290000	157760000	86298000	198200000	80308000	75228000	51480000	7499400	3293400	2313700	6910100	8303100	4542000	10432000	4226700	3959400	217480000	226000000	229870000	196110000	348360000	241850000	312760000	215610000	235140000	3	3	3	6.6	6.6	6.6	50.508	0.00086022	3.4173	978110000	23	3	2	2	3	2
481	A9DA50;Q9D1T0;REV__CON__P19013;B7ZN36;B2RQD4;Q3URE9	A9DA50;Q9D1T0	Leucine-rich repeat and immunoglobulin-like domain-containing nogo receptor-interacting protein 1	Lingo1	tr|A9DA50|A9DA50_MOUSE Leucine-rich repeat and immunoglobulin-like domain-containing nogo receptor-interacting protein 1 OS=Mus musculus GN=Lingo1 PE=2 SV=1;sp|Q9D1T0|LIGO1_MOUSE Leucine-rich repeat and immunoglobulin-like domain-containing nogo receptor-i	6538400	16693000	9675900	54572000	68667000	21413000	95477000	37605000	49501000	11617000	210920	538480	312130	1760400	2215100	690730	3079900	1213100	1596800	37334000	64449000	76472000	65361000	94980000	92773000	107010000	89373000	107330000	11	11	11	21.1	21.1	21.1	69.831	0	32.501	360140000	28	2	6	4	5	8
482	Q810R7;A9E3L2;Q9Z2I2;Q80YE1	Q810R7;A9E3L2;Q9Z2I2;Q80YE1	Peptidyl-prolyl cis-trans isomerase;Peptidyl-prolyl cis-trans isomerase FKBP1B	Fkbp1b	tr|Q810R7|Q810R7_MOUSE Peptidyl-prolyl cis-trans isomerase OS=Mus musculus GN=Fkbp1b PE=2 SV=2;tr|A9E3L2|A9E3L2_MOUSE Peptidyl-prolyl cis-trans isomerase OS=Mus musculus GN=Fkbp1b PE=2 SV=1;sp|Q9Z2I2|FKB1B_MOUSE Peptidyl-prolyl cis-trans isomerase FKBP1B O	56614000	15976000	6393900	43558000	76229000	21320000	36226000	13911000	20052000	96760000	18871000	5325400	2131300	14519000	25410000	7106600	12075000	4637100	6684000	45846000	35756000	0	42495000	75708000	0	33434000	0	35833000	2	2	2	25	25	25	11.811	0	50.321	290280000	6	2	2	1	2	2
483	A9JSM3	A9JSM3	Transmembrane protein 238	Tmem238	sp|A9JSM3|TM238_MOUSE Transmembrane protein 238 OS=Mus musculus GN=Tmem238 PE=2 SV=1	7345000	2172800	2726200	9892200	11415000	0	8394900	5187200	2278100	8235200	1224200	362130	454360	1648700	1902500	0	1399100	864530	379690	0	0	0	0	0	0	0	0	7969300	1	1	1	5.7	5.7	5.7	18.226	0.0028075	2.2712	49411000	3	1	1	1	1	1
484	A9UGK3;Q6VN19	A9UGK3;Q6VN19	Ran-binding protein 10	Ranbp10	tr|A9UGK3|A9UGK3_MOUSE RAN binding protein 10 OS=Mus musculus GN=Ranbp10 PE=2 SV=1;sp|Q6VN19|RBP10_MOUSE Ran-binding protein 10 OS=Mus musculus GN=Ranbp10 PE=1 SV=2	56859000	28493000	21031000	46236000	46727000	15461000	83854000	89738000	28415000	17367000	2369100	1187200	876310	1926500	1947000	644230	3493900	3739100	1183900	81179000	84925000	80067000	52239000	65050000	56548000	107780000	119580000	117890000	10	8	8	21.5	16	16	67.188	0	10.508	416810000	25	8	7	6	7	6
485	B0EVI6	B0EVI6		Cnnm1	tr|B0EVI6|B0EVI6_MOUSE Ancient conserved domain protein 1 OS=Mus musculus GN=Cnnm1 PE=2 SV=1	10386000	6540100	5306400	17459000	11149000	5029100	32934000	2561800	11650000	2710900	273310	172110	139640	459450	293400	132340	866690	67416	306580	0	0	0	10829000	9116700	0	48715000	0	0	16	2	2	28.8	3.8	3.8	68.517	0	5.4937	103020000	8	9	10	6	14	13
486	B0F2B4	B0F2B4	Neuroligin 4-like	Nlgn4l	sp|B0F2B4|NLGN4_MOUSE Neuroligin 4-like OS=Mus musculus GN=Nlgn4l PE=1 SV=1	21938000	21503000	21449000	82070000	64688000	57366000	61370000	43671000	45503000	14468000	756500	741470	739620	2830000	2230600	1978200	2116200	1505900	1569100	41562000	41362000	75132000	72429000	74629000	70049000	64556000	55484000	83730000	10	7	7	17.5	13.5	13.5	97.347	0	13.911	419560000	26	7	8	7	8	8
487	B0FTY3;Q8R1N4;Q8R1N4-3;Q8R1N4-2;B1AS63;Q8R1N4-4	B0FTY3;Q8R1N4;Q8R1N4-3;Q8R1N4-2	NudC domain-containing protein 3	Nudcd3	tr|B0FTY3|B0FTY3_MOUSE NudC domain containing 3, isoform CRA_a OS=Mus musculus GN=Nudcd3 PE=2 SV=1;sp|Q8R1N4|NUDC3_MOUSE NudC domain-containing protein 3 OS=Mus musculus GN=Nudcd3 PE=2 SV=3;sp|Q8R1N4-3|NUDC3_MOUSE Isoform 3 of NudC domain-containing protei	151330000	57300000	43722000	146560000	185980000	38437000	132880000	144850000	75229000	40678000	6305400	2387500	1821700	6106500	7749000	1601600	5536500	6035200	3134600	191580000	193850000	251600000	138370000	135280000	131010000	157820000	184220000	216420000	9	9	9	30.6	30.6	30.6	40.89	0	34.774	976270000	53	8	8	6	7	9
488	B0LAA9	B0LAA9	Phosphoglycerate kinase	Pgk1	tr|B0LAA9|B0LAA9_MOUSE Phosphoglycerate kinase (Fragment) OS=Mus musculus GN=Pgk1 PE=2 SV=1	119360000	5447300	0	36601000	66861000	18268000	40952000	43774000	0	47323000	17052000	778180	0	5228700	9551500	2609800	5850200	6253400	0	155780000	0	0	0	193070000	0	143780000	160890000	0	7	1	1	71.1	26.3	26.3	8.484	1	-2	331260000	6	7	6	4	6	5
489	B0LAE4;Q3TQE3;Q8C1Y9;Q80ZW9;Q3TIC7;Q9JKW0;Q3UBA1;Q3THR3	B0LAE4;Q3TQE3;Q8C1Y9;Q80ZW9;Q3TIC7;Q9JKW0;Q3UBA1;Q3THR3	ADP-ribosylation factor-like protein 6-interacting protein 1	Arl6ip1	tr|B0LAE4|B0LAE4_MOUSE ADP-ribosylation factor-like 6 interacting protein 1 (Fragment) OS=Mus musculus GN=Arl6ip1 PE=2 SV=1;tr|Q3TQE3|Q3TQE3_MOUSE Putative uncharacterized protein (Fragment) OS=Mus musculus GN=Arl6ip1 PE=2 SV=1;tr|Q8C1Y9|Q8C1Y9_MOUSE Putat	673690000	302010000	386760000	812510000	867410000	430820000	718280000	671400000	425480000	881390000	112280000	50335000	64460000	135420000	144570000	71804000	119710000	111900000	70914000	960740000	680800000	1139100000	917600000	1723600000	1114500000	908560000	1102900000	766320000	4	4	4	38	38	38	15.907	0	92.378	5288400000	58	4	4	3	4	4
490	B0QZH6;Q80Y50-2;Q80Y50;B0QZH4;Q80Y50-4;Q80Y50-3;Q80Y50-5	B0QZH6;Q80Y50-2;Q80Y50;B0QZH4;Q80Y50-4;Q80Y50-3;Q80Y50-5	Calmodulin-binding transcription activator 2	Camta2	tr|B0QZH6|B0QZH6_MOUSE Calmodulin-binding transcription activator 2 OS=Mus musculus GN=Camta2 PE=4 SV=1;sp|Q80Y50-2|CMTA2_MOUSE Isoform 2 of Calmodulin-binding transcription activator 2 OS=Mus musculus GN=Camta2;sp|Q80Y50|CMTA2_MOUSE Calmodulin-binding tra	12690000	6135500	1658400	25036000	39768000	14657000	3758000	4675800	2154000	2085500	239430	115760	31291	472380	750350	276540	70905	88222	40642	22643000	18557000	0	32305000	39197000	26842000	0	11273000	9247100	9	6	6	11.4	8.7	8.7	128.48	0	12.612	110530000	12	5	4	1	7	8
491	B0QZL1	B0QZL1	Enolase	Eno1	tr|B0QZL1|B0QZL1_MOUSE Enolase (Fragment) OS=Mus musculus GN=Eno1 PE=1 SV=1	8271900	4559400	0	0	0	2407500	14751000	14102000	0	3391600	636300	350720	0	0	0	185190	1134700	1084700	0	0	0	0	0	0	0	0	22151000	0	20	1	1	85.5	6.3	6.3	23.935	1	-2	44091000	2	19	17	15	17	18
492	B0QZM2;B1ASK8;Q6P073	B0QZM2;B1ASK8;Q6P073	Ubiquitin-conjugating enzyme E2 J2	Ube2j2	tr|B0QZM2|B0QZM2_MOUSE Ubiquitin-conjugating enzyme E2 J2 (Fragment) OS=Mus musculus GN=Ube2j2 PE=4 SV=1;tr|B1ASK8|B1ASK8_MOUSE Ubiquitin-conjugating enzyme E2 J2 OS=Mus musculus GN=Ube2j2 PE=4 SV=1;sp|Q6P073|UB2J2_MOUSE Ubiquitin-conjugating enzyme E2 J2	6194700	2652500	2284700	23276000	23029000	5111500	22558000	11110000	8232600	20890000	1238900	530500	456950	4655100	4605900	1022300	4511600	2222000	1646500	0	0	0	21787000	16371000	0	15646000	14131000	15595000	2	2	2	21.7	21.7	21.7	13.756	0.00044656	4.2345	104450000	7	1	1	1	2	2
493	Q8CHR4;O35619;B0QZN5;P63044	Q8CHR4;O35619;B0QZN5;P63044	Vesicle-associated membrane protein 2	Vamp2	tr|Q8CHR4|Q8CHR4_MOUSE Vesicle-associated membrane protein 2 OS=Mus musculus GN=Vamp2 PE=2 SV=2;tr|O35619|O35619_MOUSE Vesicle associated membrane protein 2 OS=Mus musculus GN=Vamp2 PE=2 SV=1;tr|B0QZN5|B0QZN5_MOUSE Vesicle-associated membrane protein 2 OS=	10097000000	4798100000	4872800000	19597000000	9261500000	5343600000	26228000000	9983600000	7607500000	19558000000	2019400000	959610000	974560000	3919400000	1852300000	1068700000	5245500000	1996700000	1521500000	9874100000	12587000000	13464000000	6988900000	7817400000	8745600000	16404000000	14731000000	17398000000	8	8	4	68.1	68.1	39.7	12.691	0	323.31	97789000000	827	8	8	7	8	8
494	H3BJY1;H3BJ78;H3BKF4;H3BIZ8;B0QZP8;O55101	H3BJY1;H3BJ78;H3BKF4;H3BIZ8;B0QZP8;O55101	Synaptogyrin-2	Syngr2;Gm20708	tr|H3BJY1|H3BJY1_MOUSE Synaptogyrin-2 OS=Mus musculus GN=Syngr2 PE=4 SV=1;tr|H3BJ78|H3BJ78_MOUSE Synaptogyrin-2 (Fragment) OS=Mus musculus GN=Syngr2 PE=4 SV=1;tr|H3BKF4|H3BKF4_MOUSE Protein Gm20708 OS=Mus musculus GN=Gm20708 PE=4 SV=1;tr|H3BIZ8|H3BIZ8_MOUS	39231000	16735000	0	15674000	18873000	8110900	15511000	10761000	6229800	43709000	13077000	5578400	0	5224700	6291100	2703600	5170400	3587000	2076600	86841000	0	0	0	0	0	0	0	0	1	1	1	21.7	21.7	21.7	4.6893	0.0016554	2.7269	131130000	6	1	1	0	1	1
495	B0R091;P61022;B0R092	B0R091;P61022	Calcineurin B homologous protein 1	Chp1	tr|B0R091|B0R091_MOUSE Calcineurin B homologous protein 1 OS=Mus musculus GN=Chp1 PE=4 SV=1;sp|P61022|CHP1_MOUSE Calcineurin B homologous protein 1 OS=Mus musculus GN=Chp1 PE=1 SV=2	206060000	90974000	82491000	558560000	452890000	205050000	239440000	193960000	82810000	132010000	12878000	5685900	5155700	34910000	28305000	12816000	14965000	12123000	5175700	252620000	300460000	351940000	450510000	397890000	440820000	235790000	278610000	266660000	10	10	10	57.1	57.1	57.1	21.997	0	104.76	2112200000	67	7	6	5	10	10
496	B0R0S4;Q8VCH5;A2AUF7;Q3U6R8	B0R0S4;Q8VCH5;A2AUF7;Q3U6R8	Rab9 effector protein with kelch motifs	Rabepk	tr|B0R0S4|B0R0S4_MOUSE Rab9 effector protein with kelch motifs OS=Mus musculus GN=Rabepk PE=4 SV=1;sp|Q8VCH5|RABEK_MOUSE Rab9 effector protein with kelch motifs OS=Mus musculus GN=Rabepk PE=2 SV=2;tr|A2AUF7|A2AUF7_MOUSE Rab9 effector protein with kelch mot	43262000	673310	9029200	33407000	24152000	12144000	34310000	25520000	15532000	11649000	2544800	39607	531130	1965100	1420700	714340	2018200	1501200	913650	53441000	0	0	53237000	45941000	37572000	57522000	51234000	45479000	4	4	4	22.3	22.3	22.3	40.207	0	9.5612	198030000	17	3	1	1	2	2
497	B0V2N1-4;B0V2N1-3	B0V2N1-4;B0V2N1-3	Receptor-type tyrosine-protein phosphatase S	Ptprs	sp|B0V2N1-4|PTPRS_MOUSE Isoform 4 of Receptor-type tyrosine-protein phosphatase S OS=Mus musculus GN=Ptprs;sp|B0V2N1-3|PTPRS_MOUSE Isoform 3 of Receptor-type tyrosine-protein phosphatase S OS=Mus musculus GN=Ptprs	318130000	140360000	137130000	337690000	262720000	200710000	624020000	553650000	235660000	36494000	4131500	1822900	1780900	4385600	3412000	2606600	8104200	7190200	3060500	526100000	528830000	681660000	459350000	362920000	485910000	675630000	738160000	732300000	41	29	1	39.5	29.7	0.5	167.87	0	96.996	2810100000	131	34	26	22	32	30
498	B0V2Q7;Q3UN02;B0V2Q9	B0V2Q7;Q3UN02	Lysocardiolipin acyltransferase 1	Lclat1	tr|B0V2Q7|B0V2Q7_MOUSE Lclat1 protein OS=Mus musculus GN=Lclat1 PE=2 SV=1;sp|Q3UN02|LCLT1_MOUSE Lysocardiolipin acyltransferase 1 OS=Mus musculus GN=Lclat1 PE=2 SV=2	45207000	26793000	10609000	42654000	69481000	21111000	64068000	49330000	12784000	18002000	2379300	1410200	558350	2244900	3656900	1111100	3372000	2596300	672840	79751000	65853000	84636000	37548000	52467000	48165000	53855000	61753000	64063000	7	7	7	22.1	22.1	22.1	44.399	0	13.699	342040000	28	5	7	3	6	7
499	B2RSE4;B0V2V8;Q3UH70;Q9ESU6-2;Q9ESU6;Q3U3Z2;Q3SYK2;B0V2V6;Q63ZX2;O35692;D6RGP2;Q91Y44	B2RSE4;B0V2V8;Q3UH70;Q9ESU6-2;Q9ESU6;Q3U3Z2;Q3SYK2;B0V2V6;Q63ZX2	Bromodomain-containing protein 4	Brd4	tr|B2RSE4|B2RSE4_MOUSE Bromodomain containing 4 OS=Mus musculus GN=Brd4 PE=2 SV=1;tr|B0V2V8|B0V2V8_MOUSE Bromodomain-containing protein 4 OS=Mus musculus GN=Brd4 PE=1 SV=1;tr|Q3UH70|Q3UH70_MOUSE Bromodomain-containing protein 4 OS=Mus musculus GN=Brd4 PE=1	93115000	54722000	46484000	323350000	283490000	147380000	17560000	24052000	18595000	28821000	2660400	1563500	1328100	9238500	8099700	4210800	501720	687200	531300	213260000	155670000	262620000	309760000	318560000	406280000	46273000	50348000	61023000	17	12	11	33.5	27	25.2	80.604	0	31.64	1008700000	40	11	12	11	16	15
500	B0V3P3;Q9D8S2;Q7TND3;Q7TMS3;Q9WV76;Q3TN27;B0V3P4;Q9CW72	B0V3P3;Q9D8S2;Q7TND3;Q7TMS3;Q9WV76;Q3TN27;B0V3P4	AP complex subunit beta;AP-4 complex subunit beta-1	Ap4b1	tr|B0V3P3|B0V3P3_MOUSE AP-4 complex subunit beta-1 OS=Mus musculus GN=Ap4b1 PE=4 SV=1;tr|Q9D8S2|Q9D8S2_MOUSE Putative uncharacterized protein OS=Mus musculus GN=Ap4b1 PE=2 SV=1;tr|Q7TND3|Q7TND3_MOUSE Adaptor-related protein complex AP-4, beta 1 OS=Mus musc	15670000	4531200	2626500	22275000	18167000	12306000	62662000	13515000	14374000	3691700	348220	100690	58367	495010	403710	273470	1392500	300330	319420	17747000	20253000	26708000	24785000	25335000	19410000	59377000	20588000	29217000	9	9	9	17.5	17.5	17.5	74.668	0	16.332	166130000	18	4	3	3	6	4
501	B1APT1;B1APT2;Q9CZJ0;B1AX06;E9PYE1;E9Q0C0;E9PWC1;Q91ZG2	B1APT1;B1APT2;Q9CZJ0;B1AX06	Metallophosphoesterase MPPED2	Mpped2	tr|B1APT1|B1APT1_MOUSE Metallophosphoesterase MPPED2 (Fragment) OS=Mus musculus GN=Mpped2 PE=4 SV=1;tr|B1APT2|B1APT2_MOUSE MCG22892, isoform CRA_a OS=Mus musculus GN=Mpped2 PE=4 SV=1;sp|Q9CZJ0|MPPD2_MOUSE Metallophosphoesterase MPPED2 OS=Mus musculus GN=Mp	10522000	10292000	1744400	21783000	47423000	17957000	30434000	19315000	24472000	12263000	701490	686110	116290	1452200	3161500	1197200	2028900	1287700	1631500	0	42380000	0	30456000	53732000	45331000	42587000	36709000	45761000	4	4	4	20.8	20.8	20.8	32.191	0	8.9153	183940000	11	1	3	1	3	4
502	B1APX2;Q69ZV3;Q3UE31	B1APX2;Q69ZV3;Q3UE31	Uncharacterized protein KIAA0930 homolog	5031439G07Rik;mKIAA0930	tr|B1APX2|B1APX2_MOUSE Protein 5031439G07Rik OS=Mus musculus GN=5031439G07Rik PE=1 SV=1;tr|Q69ZV3|Q69ZV3_MOUSE MKIAA0930 protein (Fragment) OS=Mus musculus GN=mKIAA0930 PE=4 SV=1;sp|Q3UE31|K0930_MOUSE Uncharacterized protein KIAA0930 homolog OS=Mus musculu	19411000	14258000	5497000	76085000	65177000	31824000	49996000	28162000	32844000	11147000	669350	491670	189550	2623600	2247500	1097400	1724000	971100	1132600	42113000	47634000	38557000	71455000	89804000	56547000	63589000	42480000	40664000	11	11	11	28.6	28.6	28.6	50.235	0	16.416	323250000	30	4	5	4	8	8
503	Q3V299;B1AQD9;Q9Z2R6	Q3V299;B1AQD9;Q9Z2R6	Protein unc-119 homolog A	Unc119	tr|Q3V299|Q3V299_MOUSE Unc-119 homolog (C. elegans), isoform CRA_a OS=Mus musculus GN=Unc119 PE=2 SV=1;tr|B1AQD9|B1AQD9_MOUSE Protein unc-119 homolog A OS=Mus musculus GN=Unc119 PE=1 SV=1;sp|Q9Z2R6|U119A_MOUSE Protein unc-119 homolog A OS=Mus musculus GN=U	11650000	8941400	8428700	10720000	10989000	1073400	44310000	32368000	23114000	8917400	685270	525970	495810	630610	646390	63143	2606500	1904000	1359700	21406000	0	0	18669000	0	0	37053000	28813000	0	4	3	3	23.3	19.6	19.6	27.01	0	6.1071	151590000	4	3	3	3	3	3
504	B1AQF4;Q9D7X3;H3BKL8;Q3V2Y9;H3BKD1	B1AQF4;Q9D7X3;H3BKL8;Q3V2Y9	Dual specificity protein phosphatase 3	Dusp3	tr|B1AQF4|B1AQF4_MOUSE Dual-specificity protein phosphatase 3 OS=Mus musculus GN=Dusp3 PE=4 SV=1;sp|Q9D7X3|DUS3_MOUSE Dual specificity protein phosphatase 3 OS=Mus musculus GN=Dusp3 PE=1 SV=1;tr|H3BKL8|H3BKL8_MOUSE Dual-specificity protein phosphatase 3 OS	723560000	362990000	319020000	926930000	621290000	338010000	918820000	672740000	398960000	480210000	65778000	32999000	29002000	84266000	56481000	30728000	83529000	61158000	36269000	1056300000	1077400000	1600900000	927590000	983770000	1176200000	1056600000	1101200000	1141300000	7	7	7	50	50	50	23.223	0	221.34	5282300000	159	7	6	5	6	7
505	B1AQN2;Q99M80-4;Q99M80-3;Q99M80-5;Q99M80;Q99M80-2;Q571D5	B1AQN2;Q99M80-4;Q99M80-3;Q99M80-5;Q99M80;Q99M80-2;Q571D5	Protein-tyrosine-phosphatase;Receptor-type tyrosine-protein phosphatase T	Ptprt	tr|B1AQN2|B1AQN2_MOUSE Receptor-type tyrosine-protein phosphatase T OS=Mus musculus GN=Ptprt PE=4 SV=1;sp|Q99M80-4|PTPRT_MOUSE Isoform 4 of Receptor-type tyrosine-protein phosphatase T OS=Mus musculus GN=Ptprt;sp|Q99M80-3|PTPRT_MOUSE Isoform 3 of Receptor-	3681800	995660	3132100	1767200	8631900	0	42277000	14917000	1924400	978820	46605	12603	39647	22370	109260	0	535150	188820	24359	7737800	0	10887000	0	11037000	0	39866000	15054000	0	6	4	4	5.4	3.9	3.9	163.01	0.00044723	4.2641	77326000	5	4	3	2	2	5
506	B1AQR8;G3X9T7;Q99L83;O08573-2;O08573	B1AQR8;G3X9T7;Q99L83;O08573-2;O08573	Galectin;Galectin-9	Lgals9	tr|B1AQR8|B1AQR8_MOUSE Galectin OS=Mus musculus GN=Lgals9 PE=4 SV=1;tr|G3X9T7|G3X9T7_MOUSE Galectin OS=Mus musculus GN=Lgals9 PE=4 SV=1;tr|Q99L83|Q99L83_MOUSE Galectin OS=Mus musculus GN=Lgals9 PE=1 SV=1;sp|O08573-2|LEG9_MOUSE Isoform Short of Galectin-9 O	14413000	5845600	0	8164300	0	0	4038500	0	0	2028800	900810	365350	0	510270	0	0	252410	0	0	0	0	0	14635000	0	0	0	0	0	2	2	2	6.2	6.2	6.2	39.907	0.0014067	3.0895	32461000	2	2	1	0	2	0
507	B1AQX6;B1AQX7;Q9QWI6-3;B1AQX8	B1AQX6;B1AQX7;Q9QWI6-3		Srcin1	tr|B1AQX6|B1AQX6_MOUSE SRC kinase-signaling inhibitor 1 OS=Mus musculus GN=Srcin1 PE=1 SV=1;tr|B1AQX7|B1AQX7_MOUSE SRC kinase-signaling inhibitor 1 OS=Mus musculus GN=Srcin1 PE=1 SV=1;sp|Q9QWI6-3|SRCN1_MOUSE Isoform 3 of SRC kinase signaling inhibitor 1 OS	9497800	7231700	913020	8995200	2222600	2179000	45392000	33379000	28958000	1671900	114430	87129	11000	108380	26779	26253	546890	402160	348890	9252800	12905000	0	8142100	0	0	41673000	42615000	55317000	67	2	1	66.6	1.5	0.9	126.99	0.0041429	1.8805	138770000	10	56	51	51	57	49
508	B1AQX9;Q9QWI6-2	B1AQX9;Q9QWI6-2		Srcin1	tr|B1AQX9|B1AQX9_MOUSE SRC kinase-signaling inhibitor 1 OS=Mus musculus GN=Srcin1 PE=1 SV=1;sp|Q9QWI6-2|SRCN1_MOUSE Isoform 2 of SRC kinase signaling inhibitor 1 OS=Mus musculus GN=Srcin1	2450900000	1414300000	1284800000	2189500000	2408500000	1493100000	6974800000	5060400000	3519300000	326770000	29889000	17247000	15669000	26701000	29372000	18208000	85058000	61712000	42918000	3642500000	4302700000	5219200000	2806300000	3162200000	3158100000	7390200000	7211400000	8379900000	68	68	0	66.4	66.4	0	130.61	0	323.31	26795000000	638	57	52	52	57	51
509	B1AQY2;Q69ZH9;F8VQ11;D6RDB5	B1AQY2;Q69ZH9;F8VQ11;D6RDB5	Rho GTPase-activating protein 23	Arhgap23	tr|B1AQY2|B1AQY2_MOUSE Rho GTPase-activating protein 23 OS=Mus musculus GN=Arhgap23 PE=4 SV=1;sp|Q69ZH9|RHG23_MOUSE Rho GTPase-activating protein 23 OS=Mus musculus GN=Arhgap23 PE=2 SV=2;tr|F8VQ11|F8VQ11_MOUSE Rho GTPase-activating protein 23 OS=Mus muscul	126640000	54374000	38899000	166390000	112360000	78198000	260320000	228000000	142260000	12577000	1319200	566400	405200	1733200	1170400	814560	2711600	2375000	1481800	169970000	222970000	250770000	225530000	169040000	183580000	227420000	259400000	258160000	17	17	17	15.5	15.5	15.5	162.21	0	43.71	1207400000	85	13	7	8	12	11
510	B1AQZ0;B1AQY9;Q8CHH9;Q8CHH9-2;B7ZC46;E0CYM4	B1AQZ0;B1AQY9;Q8CHH9;Q8CHH9-2;B7ZC46	Septin-8	2008-09-01	tr|B1AQZ0|B1AQZ0_MOUSE Septin-8 OS=Mus musculus GN=Sept8 PE=1 SV=1;tr|B1AQY9|B1AQY9_MOUSE Septin-8 OS=Mus musculus GN=Sept8 PE=1 SV=1;sp|Q8CHH9|SEPT8_MOUSE Septin-8 OS=Mus musculus GN=Sept8 PE=1 SV=4;sp|Q8CHH9-2|SEPT8_MOUSE Isoform 2 of Septin-8 OS=Mus mus	6889300000	2673000000	1913500000	7898600000	5215400000	3070700000	13209000000	8214700000	5321900000	2092600000	264970000	102810000	73598000	303790000	200590000	118100000	508050000	315950000	204690000	8755200000	8227900000	8376100000	4876800000	6278900000	5684600000	12191000000	13353000000	12386000000	30	30	26	64.9	64.9	56.6	55.874	0	323.31	54406000000	697	25	23	20	27	26
511	Q3TET1;Q3UI47;B1AQZ2;P28741;Q80UK1;Q3TSP1;Q3TTS7;Q8CGJ1;F6V6Z9;B1AQZ5;Q8C901;E9PX57	Q3TET1;Q3UI47;B1AQZ2;P28741;Q80UK1;Q3TSP1;Q3TTS7;Q8CGJ1	Kinesin-like protein;Kinesin-like protein KIF3A	Kif3a	tr|Q3TET1|Q3TET1_MOUSE Kinesin-like protein KIF3A OS=Mus musculus GN=Kif3a PE=1 SV=1;tr|Q3UI47|Q3UI47_MOUSE Kinesin family member 3A, isoform CRA_b OS=Mus musculus GN=Kif3a PE=1 SV=1;tr|B1AQZ2|B1AQZ2_MOUSE Kinesin-like protein KIF3A OS=Mus musculus GN=Kif3	258900000	76044000	44094000	130920000	108040000	68602000	333740000	159060000	88306000	29482000	6020900	1768500	1025500	3044700	2512600	1595400	7761400	3699200	2053600	258530000	261580000	286110000	110870000	135650000	148390000	263610000	189710000	219030000	19	19	17	31	31	27.5	79.444	0	65.442	1267700000	58	14	12	8	13	10
512	Q3UPK1;B1AR09;B1AR10;Q8VHB4;Q8CFR8	Q3UPK1;B1AR09;B1AR10;Q8VHB4		Mllt6	tr|Q3UPK1|Q3UPK1_MOUSE Putative uncharacterized protein (Fragment) OS=Mus musculus GN=Mllt6 PE=2 SV=1;tr|B1AR09|B1AR09_MOUSE Protein Mllt6 OS=Mus musculus GN=Mllt6 PE=4 SV=1;tr|B1AR10|B1AR10_MOUSE Protein Mllt6 OS=Mus musculus GN=Mllt6 PE=4 SV=1;tr|Q8VHB4|	26015000	10266000	16522000	226360000	26621000	46685000	55227000	36600000	45221000	18828000	1000600	394860	635450	8706100	1023900	1795600	2124100	1407700	1739300	20769000	35216000	59252000	138710000	87314000	219540000	14601000	17415000	0	4	4	4	6.1	6.1	6.1	95.711	0	32.847	489520000	14	3	3	2	3	3
513	Z4YKM2;B2RWE3;B3DFI8;B1AR13	Z4YKM2;B2RWE3;B3DFI8;B1AR13	CDGSH iron-sulfur domain-containing protein 3, mitochondrial	Cisd3	tr|Z4YKM2|Z4YKM2_MOUSE CDGSH iron-sulfur domain-containing protein 3, mitochondrial OS=Mus musculus GN=Cisd3 PE=1 SV=1;tr|B2RWE3|B2RWE3_MOUSE CDGSH iron sulfur domain 3 OS=Mus musculus GN=Cisd3 PE=1 SV=1;tr|B3DFI8|B3DFI8_MOUSE Cisd3 protein (Fragment) OS=M	603770000	185290000	149480000	383910000	586020000	282980000	436250000	297180000	115590000	276410000	54888000	16845000	13589000	34901000	53275000	25725000	39659000	27016000	10509000	523320000	458740000	452190000	327120000	559110000	516400000	418880000	350690000	303100000	7	7	7	55.7	55.7	55.7	13.155	0	24.361	3040500000	126	7	6	6	5	5
514	Q0VF62;B1AR74;Q8CCN5;Q3TAC0;F7C0F2;Q8CCN5-2;B1AR76;F7CPM1;Q5SWI1;B1B0B3	Q0VF62;B1AR74;Q8CCN5;Q3TAC0;F7C0F2;Q8CCN5-2	Breast carcinoma-amplified sequence 3 homolog	Bcas3	tr|Q0VF62|Q0VF62_MOUSE Bcas3 protein OS=Mus musculus GN=Bcas3 PE=1 SV=1;tr|B1AR74|B1AR74_MOUSE Breast carcinoma-amplified sequence 3 homolog OS=Mus musculus GN=Bcas3 PE=1 SV=1;sp|Q8CCN5|BCAS3_MOUSE Breast carcinoma-amplified sequence 3 homolog OS=Mus muscu	384040000	216680000	117010000	330110000	413370000	195250000	861830000	722700000	438280000	85564000	8931200	5039100	2721300	7677000	9613300	4540600	20043000	16807000	10192000	719820000	816240000	809670000	480910000	477630000	421090000	1181400000	1198500000	1289100000	25	25	25	38.4	38.4	38.4	99.464	0	89.58	3679300000	149	17	16	12	19	21
515	Q8CAW4;B1ARB3;Q08481-2;Q08481-3;Q08481;B1ARA9;Q08481-4	Q8CAW4;B1ARB3;Q08481-2;Q08481-3;Q08481;B1ARA9;Q08481-4	Platelet endothelial cell adhesion molecule	Pecam1	tr|Q8CAW4|Q8CAW4_MOUSE Putative uncharacterized protein OS=Mus musculus GN=Pecam1 PE=2 SV=1;tr|B1ARB3|B1ARB3_MOUSE Platelet endothelial cell adhesion molecule OS=Mus musculus GN=Pecam1 PE=1 SV=1;sp|Q08481-2|PECA1_MOUSE Isoform 2 of Platelet endothelial cel	10604000	5197400	0	23164000	34205000	19474000	19162000	36028000	6033200	3578300	246610	120870	0	538690	795460	452890	445620	837850	140310	31523000	40773000	0	23761000	22020000	40622000	13407000	32890000	0	4	4	4	9.2	9.2	9.2	81.986	0	10.637	153870000	11	2	2	0	3	3
516	B1ARS3;Q9DA75	B1ARS3;Q9DA75	Sodium-dependent lysophosphatidylcholine symporter 1	Mfsd2a	tr|B1ARS3|B1ARS3_MOUSE Sodium-dependent lysophosphatidylcholine symporter 1 (Fragment) OS=Mus musculus GN=Mfsd2a PE=4 SV=1;sp|Q9DA75|NLS1_MOUSE Sodium-dependent lysophosphatidylcholine symporter 1 OS=Mus musculus GN=Mfsd2a PE=1 SV=1	685450	389770	0	45761000	7063000	4605800	434050	381520	368650	11938000	137090	77953	0	9152300	1412600	921160	86810	76305	73729	0	0	0	75723000	0	0	0	0	0	3	3	3	56.6	56.6	56.6	11.219	0.00058258	3.7658	59690000	5	1	1	0	3	1
517	B1ART2;B1ART1;V9GX23;Q6A066;F6XI52	B1ART2;B1ART1;V9GX23;Q6A066		Vps13d	tr|B1ART2|B1ART2_MOUSE Protein Vps13d OS=Mus musculus GN=Vps13d PE=1 SV=2;tr|B1ART1|B1ART1_MOUSE Protein Vps13d OS=Mus musculus GN=Vps13d PE=1 SV=1;tr|V9GX23|V9GX23_MOUSE Protein Vps13d (Fragment) OS=Mus musculus GN=Vps13d PE=1 SV=1;tr|Q6A066|Q6A066_MOUSE	102290000	76412000	36566000	228410000	227640000	61723000	346060000	202010000	97686000	5303100	393440	293890	140640	878490	875520	237400	1331000	776970	375710	169150000	256580000	203810000	277380000	286400000	318740000	319100000	330570000	282590000	42	42	42	12.6	12.6	12.6	490.96	0	76.132	1378800000	118	24	18	15	27	29
518	B1AS06;Q3TY61;Q6PFD5	B1AS06;Q3TY61;Q6PFD5	Disks large-associated protein 3	Dlgap3	tr|B1AS06|B1AS06_MOUSE Disks large-associated protein 3 OS=Mus musculus GN=Dlgap3 PE=1 SV=1;tr|Q3TY61|Q3TY61_MOUSE Putative uncharacterized protein OS=Mus musculus GN=Dlgap3 PE=2 SV=1;sp|Q6PFD5|DLGP3_MOUSE Disks large-associated protein 3 OS=Mus musculus G	114690000	69180000	33172000	436120000	499730000	261220000	153120000	189150000	70778000	33221000	2085300	1257800	603130	7929400	9086000	4749500	2784000	3439000	1286900	243450000	286310000	322000000	367480000	461290000	493000000	287830000	327000000	260050000	21	21	21	31.9	31.9	31.9	104.67	0	93.205	1827200000	66	9	11	6	19	17
519	B1AS29	B1AS29	Glutamate receptor ionotropic, kainate 3	Grik3	sp|B1AS29|GRIK3_MOUSE Glutamate receptor ionotropic, kainate 3 OS=Mus musculus GN=Grik3 PE=2 SV=1	90249000	35039000	16345000	14162000	18604000	5031900	299920000	230580000	84343000	14183000	1611600	625690	291880	252890	332220	89855	5355800	4117400	1506100	107300000	121160000	55119000	20631000	23356000	30867000	441650000	344860000	151500000	15	14	14	21	19.6	19.6	104.05	0	33.413	794270000	40	10	7	6	6	6
520	B1ASA5;E9QA68	B1ASA5;E9QA68		Zfp362	tr|B1ASA5|B1ASA5_MOUSE Protein Zfp362 OS=Mus musculus GN=Zfp362 PE=2 SV=1;tr|E9QA68|E9QA68_MOUSE Protein Zfp362 (Fragment) OS=Mus musculus GN=Zfp362 PE=4 SV=1	3794600	8897000	4979300	25646000	25946000	14607000	0	0	0	3225800	145950	342190	191510	986390	997940	561790	0	0	0	0	25761000	40216000	20430000	33564000	37635000	0	0	0	6	4	4	22.7	17.9	17.9	45.672	0	6.813	83870000	8	2	5	5	6	6
521	B1ASC0;H7BX74;H7BWZ2;Q8CGM1-3;Q8CGM1;H7BX92;Q8CGM1-2;Q80T61	B1ASC0;H7BX74;H7BWZ2;Q8CGM1-3;Q8CGM1;H7BX92;Q8CGM1-2	Brain-specific angiogenesis inhibitor 2	Adgrb2;Bai2	tr|B1ASC0|B1ASC0_MOUSE Brain-specific angiogenesis inhibitor 2 OS=Mus musculus GN=Bai2 PE=1 SV=2;tr|H7BX74|H7BX74_MOUSE Brain-specific angiogenesis inhibitor 2 OS=Mus musculus GN=Bai2 PE=1 SV=1;tr|H7BWZ2|H7BWZ2_MOUSE Brain-specific angiogenesis inhibitor 2	23890000	9592100	7309500	37913000	65862000	28890000	27000000	19226000	9636800	3229800	336480	135100	102950	533980	927630	406910	380280	270790	135730	38573000	34936000	38734000	48850000	102870000	89155000	41804000	35455000	36271000	7	7	7	6.8	6.8	6.8	160.56	0	21.655	229320000	18	5	3	4	5	4
522	Q3URA1;B7ZN32;B1ASD1;P17012;Q99NJ4;H6U8U5	Q3URA1;B7ZN32;B1ASD1;P17012	Zinc finger X-chromosomal protein	Zfx	tr|Q3URA1|Q3URA1_MOUSE Putative uncharacterized protein (Fragment) OS=Mus musculus GN=Zfx PE=2 SV=1;tr|B7ZN32|B7ZN32_MOUSE Zfx protein OS=Mus musculus GN=Zfx PE=2 SV=1;tr|B1ASD1|B1ASD1_MOUSE Zinc finger protein X-linked OS=Mus musculus GN=Zfx PE=2 SV=1;sp|	62430000	23131000	5506100	60003000	45885000	40277000	8515500	6116100	2448800	10172000	2497200	925250	220240	2400100	1835400	1611100	340620	244650	97953	44547000	35378000	28101000	90887000	40053000	81394000	20231000	17962000	17481000	8	8	1	26.6	26.6	5.2	42.925	0	12.099	254310000	19	5	4	4	5	5
523	Q3URU8;B1ASP2;Q3U8P8;P52332;Q8K0I7;Q3UZ30;Q8CFX4;Q3TI10;REV__D3YWF9;REV__Q922S6;REV__Q3TEK1;REV__Q9CWX9;REV__Q4VBG1;REV__F7BHW1	Q3URU8;B1ASP2;Q3U8P8;P52332;Q8K0I7	Tyrosine-protein kinase;Tyrosine-protein kinase JAK1	Jak1	tr|Q3URU8|Q3URU8_MOUSE Tyrosine-protein kinase OS=Mus musculus GN=Jak1 PE=2 SV=1;tr|B1ASP2|B1ASP2_MOUSE Tyrosine-protein kinase OS=Mus musculus GN=Jak1 PE=3 SV=1;tr|Q3U8P8|Q3U8P8_MOUSE Tyrosine-protein kinase OS=Mus musculus GN=Jak1 PE=2 SV=1;sp|P52332|JAK	110620000	31861000	19400000	116090000	111190000	60446000	129150000	113120000	43512000	10214000	1536400	442520	269450	1612300	1544300	839530	1793700	1571200	604330	157030000	124760000	137000000	130590000	131900000	156200000	164940000	183560000	157850000	16	16	15	18.2	18.2	17.7	133.29	0	61.257	735390000	44	11	9	6	11	13
524	Q9D186;B1ASQ2;Q9DCZ4;Q3KNM9	Q9D186;B1ASQ2;Q9DCZ4;Q3KNM9	Apolipoprotein O	Apoo	tr|Q9D186|Q9D186_MOUSE Apolipoprotein O OS=Mus musculus GN=Apoo PE=2 SV=1;tr|B1ASQ2|B1ASQ2_MOUSE Apolipoprotein O OS=Mus musculus GN=Apoo PE=4 SV=1;sp|Q9DCZ4|APOO_MOUSE Apolipoprotein O OS=Mus musculus GN=Apoo PE=2 SV=1;tr|Q3KNM9|Q3KNM9_MOUSE Apoo protein	1711100000	656400000	522320000	2752600000	1804000000	1580600000	1782200000	1341700000	840040000	1299100000	171110000	65640000	52232000	275260000	180400000	158060000	178220000	134170000	84004000	2357600000	1904900000	1855700000	1460600000	1778900000	2096700000	1851400000	1512700000	1875300000	9	9	9	81.7	81.7	81.7	18.798	0	203.03	12991000000	305	7	7	7	9	8
525	B1ASU0;P59823;Q0VDP7	B1ASU0;P59823	Interleukin-1 receptor accessory protein-like 1	Il1rapl1	tr|B1ASU0|B1ASU0_MOUSE Interleukin-1 receptor accessory protein-like 1 OS=Mus musculus GN=Il1rapl1 PE=4 SV=1;sp|P59823|IRPL1_MOUSE Interleukin-1 receptor accessory protein-like 1 OS=Mus musculus GN=Il1rapl1 PE=1 SV=1	14025000	5538900	3141100	25747000	25865000	11125000	60827000	39236000	23235000	4970000	333930	131880	74789	613030	615840	264890	1448300	934200	553210	28488000	25535000	0	37155000	32342000	26358000	80764000	55755000	41236000	5	4	4	8.9	8	8	79.78	0	17.009	208740000	11	3	4	1	3	4
526	B1AT82;Q9D0M1;Q8BK29;B1AT84;B1AT83	B1AT82;Q9D0M1;Q8BK29	Phosphoribosyl pyrophosphate synthase-associated protein 1	Prpsap1	tr|B1AT82|B1AT82_MOUSE MCG6846, isoform CRA_c OS=Mus musculus GN=Prpsap1 PE=1 SV=1;sp|Q9D0M1|KPRA_MOUSE Phosphoribosyl pyrophosphate synthase-associated protein 1 OS=Mus musculus GN=Prpsap1 PE=1 SV=1;tr|Q8BK29|Q8BK29_MOUSE Putative uncharacterized protein	393910000	212090000	120360000	516870000	628030000	245580000	620210000	398600000	220660000	129090000	15150000	8157200	4629300	19879000	24155000	9445500	23854000	15331000	8487000	678850000	662910000	723510000	772710000	776530000	844670000	939650000	901560000	880980000	13	12	12	48.3	44.7	44.7	42.467	0	148.29	3356300000	101	13	11	7	13	13
527	B7ZC94;B1ATC3;Q3UHC0;Q8BWM2;Q3UQ45;Q8BXM6;Q99JR3;Q3UUG8;F6ZMJ4;Q3UHK8	B7ZC94;B1ATC3;Q3UHC0	Trinucleotide repeat-containing gene 6C protein	Tnrc6c	tr|B7ZC94|B7ZC94_MOUSE Trinucleotide repeat-containing gene 6C protein (Fragment) OS=Mus musculus GN=Tnrc6c PE=1 SV=1;tr|B1ATC3|B1ATC3_MOUSE Trinucleotide repeat-containing gene 6C protein OS=Mus musculus GN=Tnrc6c PE=1 SV=1;sp|Q3UHC0|TNR6C_MOUSE Trinucleo	14217000	6148000	3965500	7459500	13828000	7228300	0	0	8370000	816220	189560	81973	52873	99459	184380	96378	0	0	111600	19656000	27304000	25987000	0	0	0	0	0	0	5	5	5	4.7	4.7	4.7	180.23	0.0004415	3.981	61216000	7	3	2	2	3	3
528	Q66I45;B1ATD5;B1ATD4;R4GML8;Q8K296;M0QW74;Q8K296-2;Q9CVQ1;Q8R0N4;Q6PE02;Q91XS1-2;Q91XS1	Q66I45;B1ATD5;B1ATD4;R4GML8;Q8K296;M0QW74;Q8K296-2	Myotubularin-related protein 3	Mtmr3	tr|Q66I45|Q66I45_MOUSE Mtmr3 protein OS=Mus musculus GN=Mtmr3 PE=2 SV=1;tr|B1ATD5|B1ATD5_MOUSE MCG9626, isoform CRA_b OS=Mus musculus GN=Mtmr3 PE=1 SV=1;tr|B1ATD4|B1ATD4_MOUSE Myotubularin-related protein 3 (Fragment) OS=Mus musculus GN=Mtmr3 PE=1 SV=1;tr|	35231000	27515000	10409000	71302000	72211000	22077000	86391000	34531000	9472500	5273400	503310	393070	148710	1018600	1031600	315390	1234200	493290	135320	73132000	98060000	109240000	76123000	68960000	80637000	103880000	69793000	58275000	10	10	10	12.3	12.3	12.3	129.61	0	18.306	369140000	19	5	6	4	6	9
529	Q8C3C9;B1AV77;B1ATI0;P47740;Q8BQ93;Q99PH3;Q99PH4;Q3U7B5;Q8C5J1;REV__Q9DAH1;REV__Q7TT52-2	Q8C3C9;B1AV77;B1ATI0;P47740;Q8BQ93;Q99PH3;Q99PH4;Q3U7B5;Q8C5J1	Aldehyde dehydrogenase;Fatty aldehyde dehydrogenase	Aldh3a2	tr|Q8C3C9|Q8C3C9_MOUSE Aldehyde dehydrogenase OS=Mus musculus GN=Aldh3a2 PE=2 SV=1;tr|B1AV77|B1AV77_MOUSE Aldehyde dehydrogenase OS=Mus musculus GN=Aldh3a2 PE=3 SV=1;tr|B1ATI0|B1ATI0_MOUSE Aldehyde dehydrogenase OS=Mus musculus GN=Aldh3a2 PE=3 SV=1;sp|P477	1216000000	624980000	346850000	2148700000	1628400000	1055800000	1834100000	1069000000	628480000	479650000	55272000	28408000	15766000	97668000	74017000	47989000	83368000	48590000	28567000	1819800000	1935600000	1617900000	2085900000	2148200000	2263300000	2110500000	1858100000	2209100000	28	28	25	60.7	60.7	58.3	53.998	0	152.06	10552000000	293	24	21	15	23	23
530	Q9D3L6;B1ATI1;P52187;Q543W5;P35561;Q9QYK8	Q9D3L6;B1ATI1;P52187	ATP-sensitive inward rectifier potassium channel 12	Kcnj12	tr|Q9D3L6|Q9D3L6_MOUSE Putative uncharacterized protein OS=Mus musculus GN=Kcnj12 PE=2 SV=1;tr|B1ATI1|B1ATI1_MOUSE ATP-sensitive inward rectifier potassium channel 12 OS=Mus musculus GN=Kcnj12 PE=3 SV=1;sp|P52187|KCJ12_MOUSE ATP-sensitive inward rectifier	21800000	20464000	0	145900000	130470000	108560000	15304000	4967200	2776100	22512000	1090000	1023200	0	7294800	6523600	5427800	765210	248360	138800	133780000	102750000	0	177220000	151720000	166280000	34627000	0	0	8	8	7	23.2	23.2	21.8	48.367	0	16.295	450240000	20	3	4	0	7	7
531	B1ATI9;Q3U432;Q0VBR8;Q3U8N2;Q6A075;Q60780-2	B1ATI9;Q3U432;Q0VBR8;Q3U8N2;Q6A075;Q60780-2	Growth arrest-specific protein 7	Gas7	tr|B1ATI9|B1ATI9_MOUSE Growth arrest-specific protein 7 OS=Mus musculus GN=Gas7 PE=4 SV=1;tr|Q3U432|Q3U432_MOUSE Growth arrest-specific protein 7 OS=Mus musculus GN=Gas7 PE=2 SV=1;tr|Q0VBR8|Q0VBR8_MOUSE Growth arrest specific 7 OS=Mus musculus GN=Gas7 PE=2	383030000	249990000	121120000	686620000	450780000	152950000	1267600000	800090000	364710000	186540000	15960000	10416000	5046700	28609000	18783000	6373000	52818000	33337000	15196000	680680000	647150000	548190000	456880000	421180000	291750000	1019300000	945020000	864500000	14	14	1	42.7	42.7	7	47.261	0	153.72	4476900000	119	11	10	10	10	10
532	B1ATP7;Q3U0M8;Q80Y81-2;Q80Y81;B1ATP9	B1ATP7;Q3U0M8;Q80Y81-2;Q80Y81	Zinc phosphodiesterase ELAC protein 2	Elac2	tr|B1ATP7|B1ATP7_MOUSE Zinc phosphodiesterase ELAC protein 2 OS=Mus musculus GN=Elac2 PE=1 SV=1;tr|Q3U0M8|Q3U0M8_MOUSE Putative uncharacterized protein OS=Mus musculus GN=Elac2 PE=2 SV=1;sp|Q80Y81-2|RNZ2_MOUSE Isoform 2 of Zinc phosphodiesterase ELAC prote	141740000	88045000	48291000	168000000	178620000	126810000	117040000	90934000	41033000	20010000	2834700	1760900	965820	3360000	3572500	2536200	2340800	1818700	820660	205990000	197370000	348170000	205360000	232420000	255450000	113790000	109440000	100900000	16	16	16	27.3	27.3	27.3	91.946	0	28.307	1000500000	61	10	13	5	12	12
533	B1ATS5;E9Q559;Q64518-3;Q64518;B1ATS4;Q8R0X5;Q64518-2;Q8C213;Q3U1K2;Q3U6T4;Q8K3Y5;Q91YM6	B1ATS5;E9Q559;Q64518-3;Q64518;B1ATS4;Q8R0X5;Q64518-2;Q8C213;Q3U1K2	Calcium-transporting ATPase;Sarcoplasmic/endoplasmic reticulum calcium ATPase 3	Atp2a3	tr|B1ATS5|B1ATS5_MOUSE Calcium-transporting ATPase OS=Mus musculus GN=Atp2a3 PE=3 SV=1;tr|E9Q559|E9Q559_MOUSE Calcium-transporting ATPase OS=Mus musculus GN=Atp2a3 PE=3 SV=1;sp|Q64518-3|AT2A3_MOUSE Isoform SERCA3C of Sarcoplasmic/endoplasmic reticulum calc	5922700000	2406600000	1697700000	2406100000	2220400000	1130100000	11490000000	6509300000	4113300000	715020000	111750000	45408000	32031000	45399000	41894000	21322000	216790000	122820000	77609000	6676200000	5790600000	5856700000	2808200000	2615400000	2351000000	10347000000	9026800000	9216000000	50	41	36	48.7	42.6	40.5	111.71	0	323.31	37896000000	890	49	44	41	42	39
534	B1ATV3;Q2VPD3;Q32MT5;Q9QZC1;Q8BNT8;E6Y6Q0;Q8CCQ1;Q3UZG1;Q61143;G3UZW6;G3UWT1;G3UWI6;Q3UXW9;E9PVJ9;Q0VFY2;Q9WVC5;Q6NV56	B1ATV3;Q2VPD3;Q32MT5;Q9QZC1;Q8BNT8;E6Y6Q0;Q8CCQ1	Short transient receptor potential channel 3	Trpc3	tr|B1ATV3|B1ATV3_MOUSE Short transient receptor potential channel 3 OS=Mus musculus GN=Trpc3 PE=4 SV=1;tr|Q2VPD3|Q2VPD3_MOUSE Trpc3 protein (Fragment) OS=Mus musculus GN=Trpc3 PE=2 SV=1;tr|Q32MT5|Q32MT5_MOUSE Transient receptor potential cation channel sub	214780000	105860000	49842000	72937000	105020000	20429000	603020000	446970000	163880000	36382000	4383300	2160400	1017200	1488500	2143300	416910	12307000	9121800	3344500	256660000	286500000	304990000	66876000	80103000	52768000	687280000	667490000	531470000	19	19	19	26.5	26.5	26.5	103.62	0	32.22	1782700000	83	13	11	7	7	9
535	B1ATZ0;B1ATZ1;Q3TLL4;Q3UMA3;Q99LI8;B1ATY9;F6VV02	B1ATZ0;B1ATZ1;Q3TLL4;Q3UMA3;Q99LI8;B1ATY9	Hepatocyte growth factor-regulated tyrosine kinase substrate	Hgs	tr|B1ATZ0|B1ATZ0_MOUSE Hepatocyte growth factor-regulated tyrosine kinase substrate OS=Mus musculus GN=Hgs PE=1 SV=1;tr|B1ATZ1|B1ATZ1_MOUSE Hepatocyte growth factor-regulated tyrosine kinase substrate OS=Mus musculus GN=Hgs PE=1 SV=1;tr|Q3TLL4|Q3TLL4_MOUSE	1038400000	460360000	331370000	935240000	975830000	710330000	1518600000	1079400000	784820000	191080000	25326000	11228000	8082300	22811000	23801000	17325000	37038000	26327000	19142000	1233800000	1273000000	1225800000	1041600000	1038800000	1171200000	1313200000	1495100000	1444100000	23	23	23	28.9	28.9	28.9	85.778	0	267.54	7834300000	145	19	17	15	21	19
536	B1AU25;Q9Z0X1;Q1L6K5;Q2QKE3	B1AU25;Q9Z0X1	Apoptosis-inducing factor 1, mitochondrial	Aifm1	tr|B1AU25|B1AU25_MOUSE Apoptosis-inducing factor 1, mitochondrial OS=Mus musculus GN=Aifm1 PE=1 SV=1;sp|Q9Z0X1|AIFM1_MOUSE Apoptosis-inducing factor 1, mitochondrial OS=Mus musculus GN=Aifm1 PE=1 SV=1	4238700000	1701600000	1211900000	5299400000	4952100000	2982700000	3464000000	2398000000	1578200000	843230000	128450000	51564000	36726000	160590000	150060000	90385000	104970000	72668000	47825000	4222500000	3683300000	4249700000	6443100000	6024800000	5535400000	3041800000	3370000000	4364100000	32	32	31	62.2	62.2	60.2	66.113	0	323.31	27827000000	456	28	26	25	29	30
537	B1AU74;Q9CWP6;Q9CWP6-2;Q9CWP6-3;Q3U0U1;Q9CWP6-4	B1AU74;Q9CWP6;Q9CWP6-2;Q9CWP6-3	Motile sperm domain-containing protein 2	Mospd2	tr|B1AU74|B1AU74_MOUSE Motile sperm domain-containing protein 2 OS=Mus musculus GN=Mospd2 PE=4 SV=1;sp|Q9CWP6|MSPD2_MOUSE Motile sperm domain-containing protein 2 OS=Mus musculus GN=Mospd2 PE=1 SV=2;sp|Q9CWP6-2|MSPD2_MOUSE Isoform 2 of Motile sperm domain-	30195000	14642000	0	36587000	40271000	23026000	25326000	16304000	14316000	6270900	943590	457560	0	1143300	1258500	719580	791430	509510	447380	23602000	44978000	0	49793000	46309000	62094000	45414000	41794000	47082000	4	4	4	9.1	9.1	9.1	59.81	0	17.663	200670000	24	4	4	0	4	4
538	B1AU76;B1AU75;Q99MD9;Q99MD9-2;Q3TTH5	B1AU76;B1AU75;Q99MD9;Q99MD9-2	Nuclear autoantigenic sperm protein	Nasp	tr|B1AU76|B1AU76_MOUSE Nuclear autoantigenic sperm protein OS=Mus musculus GN=Nasp PE=4 SV=1;tr|B1AU75|B1AU75_MOUSE Nuclear autoantigenic sperm protein OS=Mus musculus GN=Nasp PE=1 SV=1;sp|Q99MD9|NASP_MOUSE Nuclear autoantigenic sperm protein OS=Mus muscul	139040000	24905000	23413000	79392000	83378000	56953000	15443000	4915200	1338500	17866000	5793400	1037700	975520	3308000	3474100	2373100	643440	204800	55773	89496000	162350000	77590000	54071000	90283000	66334000	22561000	26616000	0	9	9	9	28.3	28.3	28.3	48.765	0	35.943	428780000	20	6	6	3	6	7
539	B1AUE5	B1AUE5	Peroxisome biogenesis factor 10	Pex10	sp|B1AUE5|PEX10_MOUSE Peroxisome biogenesis factor 10 OS=Mus musculus GN=Pex10 PE=2 SV=1	7963000	3120700	2867400	27886000	27667000	8061700	35647000	31733000	4766800	8806700	468410	183570	168670	1640400	1627500	474220	2096900	1866600	280400	0	11974000	0	24971000	29945000	18223000	32726000	36564000	0	3	3	3	11.1	11.1	11.1	37.157	0	5.3349	149710000	12	2	2	1	3	2
540	B1AUH1-2;B1AUH1;Q3V360	B1AUH1-2;B1AUH1;Q3V360	Receptor-type tyrosine-protein phosphatase U	Ptpru	sp|B1AUH1-2|PTPRU_MOUSE Isoform 2 of Receptor-type tyrosine-protein phosphatase U OS=Mus musculus GN=Ptpru;sp|B1AUH1|PTPRU_MOUSE Receptor-type tyrosine-protein phosphatase U OS=Mus musculus GN=Ptpru PE=1 SV=1;tr|Q3V360|Q3V360_MOUSE Receptor-type tyrosine-p	3823200	315300	0	17455000	12596000	5949200	24995000	4659900	1521900	963730	51664	4260.8	0	235870	170220	80394	337780	62972	20566	0	0	0	0	0	0	30235000	0	0	5	4	4	4	3.2	3.2	161.16	0.003535	2.0186	71316000	7	2	2	0	3	2
541	B1AUH5	B1AUH5		Cask	tr|B1AUH5|B1AUH5_MOUSE Peripheral plasma membrane protein CASK (Fragment) OS=Mus musculus GN=Cask PE=4 SV=1	12949000	5129700	0	10109000	33929000	8642800	50591000	55379000	14189000	17356000	1177100	466340	0	918960	3084400	785710	4599200	5034500	1289900	0	0	0	0	0	0	52117000	62543000	0	10	3	3	62.6	12.3	12.3	17.734	0	13.847	190920000	12	8	7	6	7	7
542	B1AUN2;B1AUN3;Q3UKV0;A4FUS0;A0AUM9;Q3T9T4	B1AUN2;B1AUN3;Q3UKV0;A4FUS0;A0AUM9		Eif2b3	tr|B1AUN2|B1AUN2_MOUSE MCG14442 OS=Mus musculus GN=Eif2b3 PE=4 SV=1;tr|B1AUN3|B1AUN3_MOUSE Protein Eif2b3 OS=Mus musculus GN=Eif2b3 PE=4 SV=1;tr|Q3UKV0|Q3UKV0_MOUSE Protein Eif2b3 OS=Mus musculus GN=Eif2b3 PE=2 SV=1;tr|A4FUS0|A4FUS0_MOUSE Eif2b3 protein OS	185060000	50128000	33986000	314760000	145510000	42691000	296100000	175920000	71113000	45354000	6381400	1728500	1171900	10854000	5017400	1472100	10210000	6066200	2452200	259630000	174340000	235340000	305580000	150760000	144460000	287710000	267930000	209480000	13	13	13	36.3	36.3	36.3	50.488	0	41.284	1315300000	58	12	8	3	11	10
543	B1AUQ7;Z4YJH1;Q9R1K9	B1AUQ7;Z4YJH1;Q9R1K9	Centrin-2	Cetn2	tr|B1AUQ7|B1AUQ7_MOUSE Centrin-2 (Fragment) OS=Mus musculus GN=Cetn2 PE=4 SV=1;tr|Z4YJH1|Z4YJH1_MOUSE Centrin-2 OS=Mus musculus GN=Cetn2 PE=4 SV=1;sp|Q9R1K9|CETN2_MOUSE Centrin-2 OS=Mus musculus GN=Cetn2 PE=2 SV=1	34524000	10601000	4335400	46792000	47362000	25431000	59719000	12005000	17139000	36844000	4932000	1514500	619350	6684600	6766000	3633000	8531300	1715000	2448400	18541000	0	0	45151000	0	0	0	16199000	0	3	3	3	37.8	37.8	37.8	12.715	0	13.033	257910000	14	2	2	1	1	1
544	B1AUY7;Q540H0;Q9QY36;B1AUY8;Q684Q8	B1AUY7;Q540H0;Q9QY36;B1AUY8;Q684Q8	N-alpha-acetyltransferase 10	Naa10	tr|B1AUY7|B1AUY7_MOUSE N-alpha-acetyltransferase 10 OS=Mus musculus GN=Naa10 PE=4 SV=1;tr|Q540H0|Q540H0_MOUSE N-acetyltransferase ARD1 homolog (S. cerevisiae), isoform CRA_e OS=Mus musculus GN=Naa10 PE=2 SV=1;sp|Q9QY36|NAA10_MOUSE N-alpha-acetyltransferase	77963000	40003000	11692000	214180000	56526000	30723000	98433000	79668000	27097000	39768000	4872700	2500200	730780	13386000	3532900	1920200	6152000	4979300	1693600	142650000	159170000	91230000	193700000	99156000	103110000	118180000	135960000	113410000	8	8	1	42.1	42.1	4.3	26.318	0	24.089	636290000	24	7	7	3	7	5
545	Q3TZ53;B1AV35;Q05AA6;Q8CBX2	Q3TZ53;B1AV35;Q05AA6	Dystrophin-related protein 2	Drp2	tr|Q3TZ53|Q3TZ53_MOUSE Putative uncharacterized protein (Fragment) OS=Mus musculus GN=Drp2 PE=2 SV=1;tr|B1AV35|B1AV35_MOUSE Dystrophin-related protein 2 OS=Mus musculus GN=Drp2 PE=4 SV=1;sp|Q05AA6|DRP2_MOUSE Dystrophin-related protein 2 OS=Mus musculus GN=	47729000	29096000	12876000	35022000	36336000	25237000	87258000	81257000	64444000	8062600	917860	559540	247610	673510	698760	485330	1678000	1562600	1239300	77829000	91434000	61692000	57353000	77791000	75715000	148820000	163260000	147080000	12	11	11	17.3	16.4	16.4	108.99	0	25.289	419250000	36	9	8	4	7	5
546	Q3U4G8;B1AVH4;Q8C0P5;Q8BLN0;Q8R0L6;Q3U8R5;Q6NVB7	Q3U4G8;B1AVH4;Q8C0P5;Q8BLN0	Coronin;Coronin-2A	Coro2a	tr|Q3U4G8|Q3U4G8_MOUSE Coronin OS=Mus musculus GN=Coro2a PE=2 SV=1;tr|B1AVH4|B1AVH4_MOUSE Coronin OS=Mus musculus GN=Coro2a PE=2 SV=1;sp|Q8C0P5|COR2A_MOUSE Coronin-2A OS=Mus musculus GN=Coro2a PE=2 SV=1;tr|Q8BLN0|Q8BLN0_MOUSE Coronin OS=Mus musculus GN=Cor	237600000	124410000	73245000	509620000	248420000	167290000	510080000	335540000	194560000	72750000	7200100	3769900	2219500	15443000	7527800	5069200	15457000	10168000	5895600	473890000	504250000	463720000	423820000	471040000	409580000	674990000	607600000	653440000	16	16	1	32.8	32.8	1.3	59.601	0	41.289	2400800000	90	12	11	11	13	10
547	Q99K97;Q9ESQ1;B1AVK5	Q99K97;Q9ESQ1;B1AVK5		Col4a6	tr|Q99K97|Q99K97_MOUSE Col4a6 protein (Fragment) OS=Mus musculus GN=Col4a6 PE=2 SV=1;tr|Q9ESQ1|Q9ESQ1_MOUSE Type IV collagen alpha 6 chain OS=Mus musculus GN=Col4a6 PE=2 SV=1;tr|B1AVK5|B1AVK5_MOUSE Protein Col4a6 OS=Mus musculus GN=Col4a6 PE=4 SV=1	0	1384600	0	0	1405800	0	8435900	8957000	4269900	1111500	0	62934	0	0	63900	0	383450	407140	194090	0	0	0	0	0	0	0	12685000	0	3	2	2	7.9	6.2	6.2	55.102	0.0086466	1.525	24453000	2	1	2	1	1	2
548	B1AVZ0	B1AVZ0	Uracil phosphoribosyltransferase homolog	Uprt	sp|B1AVZ0|UPP_MOUSE Uracil phosphoribosyltransferase homolog OS=Mus musculus GN=Uprt PE=2 SV=1	69293000	27362000	8681300	67118000	68159000	45222000	82582000	57304000	28194000	25218000	3849600	1520100	482300	3728800	3786600	2512400	4587900	3183500	1566300	72854000	112780000	109300000	69545000	105660000	86422000	99086000	74091000	91599000	7	7	7	33.5	33.5	33.5	34.278	0	94.784	453920000	28	6	6	2	5	4
549	B1AW21;Q9Z2C5;Q9D4L1;Q3TLK7;Q8CD00;Q5DTJ6;Q8CCE6;Q3UDN6	B1AW21;Q9Z2C5;Q9D4L1;Q3TLK7;Q8CD00;Q5DTJ6;Q8CCE6	Myotubularin	Mtm1	tr|B1AW21|B1AW21_MOUSE Myotubularin OS=Mus musculus GN=Mtm1 PE=4 SV=1;sp|Q9Z2C5|MTM1_MOUSE Myotubularin OS=Mus musculus GN=Mtm1 PE=1 SV=2;tr|Q9D4L1|Q9D4L1_MOUSE Putative uncharacterized protein OS=Mus musculus GN=Mtm1 PE=2 SV=1;tr|Q3TLK7|Q3TLK7_MOUSE Putat	50291000	50612000	10388000	74066000	96589000	41562000	133800000	110820000	33408000	15424000	1289500	1297700	266370	1899100	2476600	1065700	3430800	2841500	856630	86894000	104770000	62420000	113880000	117040000	151440000	142070000	109780000	80132000	14	13	13	28.1	26.6	26.6	65.962	0	34.184	601540000	40	8	7	2	10	10
550	B1AW58;Q8BW96;Q8BW96-3	B1AW58;Q8BW96;Q8BW96-3	Calcium/calmodulin-dependent protein kinase type 1D	Camk1d	tr|B1AW58|B1AW58_MOUSE Calcium/calmodulin-dependent protein kinase ID OS=Mus musculus GN=Camk1d PE=2 SV=1;sp|Q8BW96|KCC1D_MOUSE Calcium/calmodulin-dependent protein kinase type 1D OS=Mus musculus GN=Camk1d PE=1 SV=2;sp|Q8BW96-3|KCC1D_MOUSE Isoform 3 of Cal	0	0	2051800	3060000	3244100	0	0	3103200	0	545670	0	0	97704	145710	154480	0	0	147770	0	0	0	0	0	0	0	0	9774900	0	13	1	1	46.2	6.5	6.5	42.918	1	-2	11459000	1	8	10	9	11	11
551	B1AWC9;B1AWC8;Q8VBU5;Q9QXI7;Q8BQB2;B1AWD1;Q3TTI9;Q6IQY6;Q91VY2;B1AWD0;G3UZ46;Q80VK8;G3UWT3;Q3UEI1-2;Q3UEI1;Q80UU8;D3Z2G1	B1AWC9;B1AWC8;Q8VBU5;Q9QXI7;Q8BQB2;B1AWD1;Q3TTI9;Q6IQY6;Q91VY2;B1AWD0		Pde4b	tr|B1AWC9|B1AWC9_MOUSE Protein Pde4b OS=Mus musculus GN=Pde4b PE=1 SV=1;tr|B1AWC8|B1AWC8_MOUSE Protein Pde4b OS=Mus musculus GN=Pde4b PE=1 SV=1;tr|Q8VBU5|Q8VBU5_MOUSE Phosphodiesterase 4B OS=Mus musculus GN=Pde4b PE=1 SV=1;tr|Q9QXI7|Q9QXI7_MOUSE CAMP-speci	368890000	245920000	75819000	374050000	520830000	242730000	821050000	776300000	435280000	98997000	9458600	6305700	1944100	9591100	13355000	6223900	21052000	19905000	11161000	556320000	649910000	614660000	500300000	524500000	485160000	872490000	1079900000	1192800000	23	23	18	37.8	37.8	32.1	83.301	0	171.31	3860900000	139	17	16	10	18	18
552	B1AWD8;B1AWD9;O08585;B1AWE1	B1AWD8;B1AWD9;O08585;B1AWE1	Clathrin light chain A	Clta	tr|B1AWD8|B1AWD8_MOUSE Clathrin light chain A OS=Mus musculus GN=Clta PE=1 SV=1;tr|B1AWD9|B1AWD9_MOUSE Clathrin light chain A OS=Mus musculus GN=Clta PE=1 SV=1;sp|O08585|CLCA_MOUSE Clathrin light chain A OS=Mus musculus GN=Clta PE=1 SV=2;tr|B1AWE1|B1AWE1_M	3754900000	1303200000	918500000	2133400000	3065500000	2232200000	4460500000	2370600000	1442300000	2168100000	375490000	130320000	91850000	213340000	306550000	223220000	446050000	237060000	144230000	3182900000	3626000000	2814700000	2506900000	2961900000	2797100000	4061000000	3087500000	2724700000	9	9	1	25.4	25.4	3.4	25.661	0	62.736	21681000000	165	9	9	8	9	9
553	B1AWE0;Q6PFA2;Q3THU7	B1AWE0;Q6PFA2;Q3THU7		Clta	tr|B1AWE0|B1AWE0_MOUSE Clathrin light chain A OS=Mus musculus GN=Clta PE=1 SV=1;tr|Q6PFA2|Q6PFA2_MOUSE Clathrin light chain A OS=Mus musculus GN=Clta PE=1 SV=1;tr|Q3THU7|Q3THU7_MOUSE Putative uncharacterized protein OS=Mus musculus GN=Clta PE=2 SV=1	18710000	10407000	10827000	32160000	25075000	21215000	25110000	14926000	14274000	17270000	1871000	1040700	1082700	3216000	2507500	2121500	2511000	1492600	1427400	0	0	0	0	0	0	0	0	41737000	9	1	1	33.8	9.7	9.7	23.478	0.0024262	2.3889	172700000	6	9	9	8	9	9
554	B1AWI7;Q6VVW5;Q6VVW5-2;Q6VVW5-3;F6YT88;Q3TZ08;Q99P52	B1AWI7;Q6VVW5;Q6VVW5-2;Q6VVW5-3	Atrial natriuretic peptide receptor 2	Npr2	tr|B1AWI7|B1AWI7_MOUSE Atrial natriuretic peptide receptor 2 OS=Mus musculus GN=Npr2 PE=4 SV=1;sp|Q6VVW5|ANPRB_MOUSE Atrial natriuretic peptide receptor 2 OS=Mus musculus GN=Npr2 PE=2 SV=2;sp|Q6VVW5-2|ANPRB_MOUSE Isoform 2 of Atrial natriuretic peptide rec	21262000	10865000	46616000	37943000	30249000	44336000	22761000	30080000	13625000	4368400	360370	184150	790090	643110	512690	751460	385770	509820	230930	25781000	33316000	0	42183000	55732000	32086000	48555000	47685000	52768000	5	5	5	7.1	7.1	7.1	115.77	0.00085592	3.3277	257730000	15	4	4	2	4	3
555	B1AWN6;Q62242;Q8CCS4;Q8CAJ8;Q68V27;Q8C274;A9JQD3	B1AWN6	Sodium channel protein	Scn2a1	tr|B1AWN6|B1AWN6_MOUSE Sodium channel protein OS=Mus musculus GN=Scn2a1 PE=3 SV=1	1795700000	851910000	535930000	1566400000	1264900000	674940000	6368000000	3165300000	1986900000	267790000	26407000	12528000	7881400	23035000	18602000	9925600	93647000	46549000	29219000	2407200000	2262700000	2002500000	2184900000	1742800000	1511200000	5518900000	4990100000	4688800000	53	53	23	26.3	26.3	12.7	227.94	0	323.31	18210000000	463	43	46	37	43	35
556	B1AWQ3;B1AWQ4;Q9ET47;B1AWP9;B1AWP7;B1AWQ0;B1AWP8;Q9QY28;B1AWQ1;Q9ET47-5;Q9ET47-4;Q9ET47-2;Q9ET47-3;Q9ET47-7;Q9ET47-6;Q9WUH6;Q3UM31;Q9DD12;Q9ET47-8	B1AWQ3;B1AWQ4;Q9ET47;B1AWP9;B1AWP7;B1AWQ0;B1AWP8;Q9QY28;B1AWQ1;Q9ET47-5;Q9ET47-4;Q9ET47-2;Q9ET47-3;Q9ET47-7;Q9ET47-6	Espin	Espn	tr|B1AWQ3|B1AWQ3_MOUSE Espin OS=Mus musculus GN=Espn PE=4 SV=1;tr|B1AWQ4|B1AWQ4_MOUSE Espin OS=Mus musculus GN=Espn PE=4 SV=1;sp|Q9ET47|ESPN_MOUSE Espin OS=Mus musculus GN=Espn PE=1 SV=2;tr|B1AWP9|B1AWP9_MOUSE Espin OS=Mus musculus GN=Espn PE=4 SV=1;tr|B1A	27222000	16392000	0	20832000	20903000	0	55370000	41643000	22493000	6025100	800650	482100	0	612700	614810	0	1628500	1224800	661550	0	0	0	0	0	0	76435000	79584000	84369000	4	4	4	7.9	7.9	7.9	91.785	0.00044843	4.3191	204850000	7	1	1	0	2	1
557	B1AWT2;B1AWT3;Q7TT45	B1AWT2;B1AWT3;Q7TT45	Ras-related GTP-binding protein D	Rragd	tr|B1AWT2|B1AWT2_MOUSE Ras-related GTP binding D, isoform CRA_a OS=Mus musculus GN=Rragd PE=4 SV=1;tr|B1AWT3|B1AWT3_MOUSE Ras-related GTP-binding protein D OS=Mus musculus GN=Rragd PE=4 SV=1;sp|Q7TT45|RRAGD_MOUSE Ras-related GTP-binding protein D OS=Mus mu	0	3439300	0	15089000	18168000	7387800	26072000	15667000	8788400	4979500	0	181010	0	794130	956220	388830	1372200	824590	462550	0	0	0	0	0	0	0	0	16950000	6	1	1	15.8	3.5	3.5	45.145	0.003048	2.161	94611000	7	5	5	2	5	5
558	B1AX58	B1AX58		Pls3	tr|B1AX58|B1AX58_MOUSE Plastin-3 OS=Mus musculus GN=Pls3 PE=4 SV=1	1305100000	592320000	439270000	2032200000	2127400000	945300000	2264000000	1223000000	703890000	283720000	31833000	14447000	10714000	49567000	51887000	23056000	55220000	29830000	17168000	1890500000	1603000000	1761200000	1666900000	1802900000	1582000000	2026400000	1792500000	1793000000	30	30	1	60.7	60.7	1.4	71.745	0	238.97	11633000000	324	24	26	21	29	27
559	B1AX98;Q505F5;E9PV22;F6YT33;F6Z4L9	B1AX98;Q505F5;E9PV22	Leucine-rich repeat-containing protein 47	Lrrc47	tr|B1AX98|B1AX98_MOUSE Leucine rich repeat containing 47 OS=Mus musculus GN=Lrrc47 PE=2 SV=1;sp|Q505F5|LRC47_MOUSE Leucine-rich repeat-containing protein 47 OS=Mus musculus GN=Lrrc47 PE=2 SV=1;tr|E9PV22|E9PV22_MOUSE Leucine-rich repeat-containing protein 4	534500000	221020000	153710000	591570000	612030000	318160000	643190000	512900000	283970000	101870000	14066000	5816400	4045100	15568000	16106000	8372500	16926000	13497000	7472900	845930000	790510000	766590000	708530000	785610000	791780000	819970000	858700000	916240000	22	22	22	51.3	51.3	51.3	63.589	0	128.54	3871000000	165	18	18	16	19	19
560	Q3TFT3;B1AXC7;B1AXC5;Q8BT77;B1AXC8;Q8K2Q5	Q3TFT3;B1AXC7;B1AXC5;Q8BT77;B1AXC8;Q8K2Q5	Coiled-coil-helix-coiled-coil-helix domain-containing protein 7	Chchd7	tr|Q3TFT3|Q3TFT3_MOUSE Coiled-coil-helix-coiled-coil-helix domain-containing protein 7 OS=Mus musculus GN=Chchd7 PE=2 SV=1;tr|B1AXC7|B1AXC7_MOUSE Coiled-coil-helix-coiled-coil-helix domain-containing protein 7 (Fragment) OS=Mus musculus GN=Chchd7 PE=4 SV=1	7821800	0	0	33333000	20175000	6907800	21802000	20001000	0	27510000	1955500	0	0	8333100	5043800	1726900	5450600	5000100	0	0	0	0	31582000	23815000	0	22602000	27569000	0	2	2	2	48.1	48.1	48.1	6.3702	0	6.4587	110040000	7	1	1	0	2	2
561	B1AXG8	B1AXG8		Nhsl2	tr|B1AXG8|B1AXG8_MOUSE NHS-like protein 2 (Fragment) OS=Mus musculus GN=Nhsl2 PE=4 SV=1	0	0	0	12874000	0	0	0	0	0	1430400	0	0	0	1430400	0	0	0	0	0	0	0	0	10279000	0	0	0	0	0	4	1	1	36.4	13.6	13.6	17.64	0.00044274	4.0419	12874000	1	3	3	2	4	3
562	B1AXI2;B1AXI4;B1AXI6;Q3UTH8-2;Q3UTH8-4;Q3UTH8;S4R1K5;Q3UTH8-3;S4R1A7;S4R1J2;Q3TQN9;Q3TDW8;E0CYU0;E0CX56;B7ZNJ6;B9EHV2;E9Q3I3;E9PYK8;Q5DU57-2;Q7TNR9;Q5DU57	B1AXI2;B1AXI4;B1AXI6;Q3UTH8-2;Q3UTH8-4;Q3UTH8;S4R1K5;Q3UTH8-3	Rho guanine nucleotide exchange factor 9	Arhgef9	tr|B1AXI2|B1AXI2_MOUSE Rho guanine nucleotide exchange factor 9 OS=Mus musculus GN=Arhgef9 PE=4 SV=1;tr|B1AXI4|B1AXI4_MOUSE Rho guanine nucleotide exchange factor 9 OS=Mus musculus GN=Arhgef9 PE=4 SV=1;tr|B1AXI6|B1AXI6_MOUSE Rho guanine nucleotide exchange	163300000	47338000	58785000	188330000	97229000	52472000	99429000	77411000	58723000	35125000	6804000	1972400	2449400	7847000	4051200	2186300	4142900	3225400	2446800	302050000	144590000	244410000	228020000	165620000	141000000	166320000	151180000	191070000	11	11	11	28.5	28.5	28.5	49.41	0	33.624	843010000	39	7	9	7	8	7
563	B1AXP6;B1AXP6-2;B1AXP6-3;B1AXP6-4	B1AXP6;B1AXP6-2;B1AXP6-3;B1AXP6-4	Mitochondrial import receptor subunit TOM5 homolog	Tomm5	sp|B1AXP6|TOM5_MOUSE Mitochondrial import receptor subunit TOM5 homolog OS=Mus musculus GN=Tomm5 PE=3 SV=1;sp|B1AXP6-2|TOM5_MOUSE Isoform 2 of Mitochondrial import receptor subunit TOM5 homolog OS=Mus musculus GN=Tomm5;sp|B1AXP6-3|TOM5_MOUSE Isoform 3 of M	291210000	103430000	49651000	355510000	227750000	137520000	258840000	150040000	30156000	320820000	58242000	20686000	9930200	71102000	45549000	27504000	51768000	30008000	6031200	369880000	257040000	132520000	323850000	235370000	187280000	275120000	248120000	101590000	4	4	4	47.1	47.1	47.1	6.0372	0	15.182	1604100000	38	4	4	4	4	4
564	B1AXS6;B1AXS8;B1AXS7;B1AXS5;Q9JLM4;B0R077;Q8CG95	B1AXS6;B1AXS8;B1AXS7;B1AXS5;Q9JLM4	Zinc finger MYM-type protein 3	Zmym3	tr|B1AXS6|B1AXS6_MOUSE Zinc finger MYM-type protein 3 OS=Mus musculus GN=Zmym3 PE=4 SV=1;tr|B1AXS8|B1AXS8_MOUSE Zinc finger MYM-type protein 3 OS=Mus musculus GN=Zmym3 PE=4 SV=1;tr|B1AXS7|B1AXS7_MOUSE Zinc finger MYM-type protein 3 OS=Mus musculus GN=Zmym3	146990000	104360000	5526100	46719000	64168000	20723000	164650000	6488200	119500000	10136000	2193900	1557500	82479	697310	957720	309300	2457400	96838	1783600	128970000	104870000	73263000	213170000	199020000	143710000	48143000	71699000	42695000	10	10	10	10.7	10.7	10.7	142.06	0	9.5473	679120000	18	6	7	4	8	8
565	B1AXV0;Q8BVG0;F6Q3S1	B1AXV0;Q8BVG0	DOMON domain-containing protein FRRS1L	Frrs1l	sp|B1AXV0|FRS1L_MOUSE DOMON domain-containing protein FRRS1L OS=Mus musculus GN=Frrs1l PE=1 SV=1;tr|Q8BVG0|Q8BVG0_MOUSE Putative uncharacterized protein (Fragment) OS=Mus musculus GN=Frrs1l PE=2 SV=1	487020000	263330000	143720000	440750000	562340000	252640000	795900000	605790000	574690000	257890000	30439000	16458000	8982400	27547000	35146000	15790000	49744000	37862000	35918000	620480000	686450000	877790000	654490000	705140000	800670000	611580000	741890000	1083000000	11	11	11	45.4	45.4	45.4	32.506	0	106.53	4126200000	91	7	8	8	9	8
566	B1AXZ4;B1AXZ5;Q3UR02;Q564D8;Q80Y51;Q60899;B1AXZ6;B1AXZ0;Q91XI8;Q80UJ0;Q91XI9;H3BLG7;B1AXZ3	B1AXZ4;B1AXZ5;Q3UR02;Q564D8;Q80Y51;Q60899;B1AXZ6;B1AXZ0;Q91XI8;Q80UJ0;Q91XI9	ELAV-like protein;ELAV-like protein 2	Elavl2	tr|B1AXZ4|B1AXZ4_MOUSE ELAV-like protein 2 OS=Mus musculus GN=Elavl2 PE=4 SV=1;tr|B1AXZ5|B1AXZ5_MOUSE ELAV-like protein 2 OS=Mus musculus GN=Elavl2 PE=4 SV=1;tr|Q3UR02|Q3UR02_MOUSE ELAV-like protein 2 OS=Mus musculus GN=Elavl2 PE=2 SV=1;tr|Q564D8|Q564D8_MO	238970000	151850000	92258000	250190000	173380000	82521000	11909000	13754000	24968000	51990000	11949000	7592600	4612900	12509000	8668800	4126100	595470	687690	1248400	358540000	438860000	527640000	379260000	294000000	290790000	72549000	67626000	77764000	20	5	5	52.8	16.5	16.5	42.531	0	59.441	1039800000	38	19	15	12	19	18
567	B1AY10-2;B1AY10-3;B1AY10	B1AY10-2;B1AY10-3;B1AY10	Transcriptional repressor NF-X1	Nfx1	sp|B1AY10-2|NFX1_MOUSE Isoform 2 of Transcriptional repressor NF-X1 OS=Mus musculus GN=Nfx1;sp|B1AY10-3|NFX1_MOUSE Isoform 3 of Transcriptional repressor NF-X1 OS=Mus musculus GN=Nfx1;sp|B1AY10|NFX1_MOUSE Transcriptional repressor NF-X1 OS=Mus musculus GN=	7600000	10499000	2779200	3163300	4701700	6173700	14921000	12656000	7334400	1485700	161700	223380	59131	67304	100040	131350	317480	269280	156050	0	0	0	0	0	24950000	33670000	18937000	0	4	4	4	7.7	7.7	7.7	89.438	0.0098541	1.4746	69829000	5	2	3	1	2	1
568	E9PV45;B1AY13;B1AY13-2	E9PV45;B1AY13	Ubiquitin carboxyl-terminal hydrolase;Ubiquitin carboxyl-terminal hydrolase 24	Usp24	tr|E9PV45|E9PV45_MOUSE Ubiquitin carboxyl-terminal hydrolase OS=Mus musculus GN=Usp24 PE=1 SV=1;sp|B1AY13|UBP24_MOUSE Ubiquitin carboxyl-terminal hydrolase 24 OS=Mus musculus GN=Usp24 PE=1 SV=1	546160000	299160000	173210000	376770000	455430000	217650000	1077500000	954230000	494090000	30628000	3641100	1994400	1154800	2511800	3036200	1451000	7183100	6361600	3293900	1005000000	1019600000	844190000	561950000	634120000	591260000	1099100000	1307300000	1339700000	59	59	59	29.8	29.8	29.8	294.13	0	185.76	4594200000	238	39	38	27	36	37
569	B1AY85;Q9DC11;B1AY86	B1AY85;Q9DC11;B1AY86	Plexin domain-containing protein 2	Plxdc2	tr|B1AY85|B1AY85_MOUSE Plexin domain-containing protein 2 OS=Mus musculus GN=Plxdc2 PE=4 SV=1;sp|Q9DC11|PXDC2_MOUSE Plexin domain-containing protein 2 OS=Mus musculus GN=Plxdc2 PE=1 SV=1;tr|B1AY86|B1AY86_MOUSE Plexin domain-containing protein 2 OS=Mus musc	57760000	19708000	12686000	18733000	10881000	11281000	53030000	55293000	30784000	11256000	2406700	821150	528580	780520	453370	470050	2209600	2303900	1282700	68648000	78069000	63941000	45147000	57111000	56910000	57061000	87372000	62291000	5	5	5	12.9	12.9	12.9	59.388	0	17.415	270160000	26	4	5	4	3	1
570	E9PW82;B2RY06;B1AYL0;F8VPQ7;B7ZWN0;Q62205;Q9R053	E9PW82;B2RY06;B1AYL0;F8VPQ7;B7ZWN0;Q62205	Sodium channel protein;Sodium channel protein type 9 subunit alpha	Scn9a	tr|E9PW82|E9PW82_MOUSE Sodium channel protein OS=Mus musculus GN=Scn9a PE=3 SV=1;tr|B2RY06|B2RY06_MOUSE Sodium channel protein OS=Mus musculus GN=Scn9a PE=2 SV=1;tr|B1AYL0|B1AYL0_MOUSE Sodium channel protein OS=Mus musculus GN=Scn9a PE=3 SV=1;tr|F8VPQ7|F8V	17967000	12007000	3730000	5391400	0	2157000	0	0	0	581020	253060	169110	52536	75935	0	30380	0	0	0	0	32213000	0	0	0	0	0	0	0	15	1	0	8.2	0.7	0	224.65	1	-2	41252000	2	14	15	11	13	9
571	B1AYU4;B1AYU7;Q6ZPL7;Q8C5N3-2;Q8C5N3;A2AK44;A2AK42;Q3TLI8;Q5FWA5;Q499E2;Q99LG3;J3QNR0;J3QM48;Q8BKP8;B1AYU8	B1AYU4;B1AYU7;Q6ZPL7;Q8C5N3-2;Q8C5N3;A2AK44;A2AK42;Q3TLI8;Q5FWA5	Pre-mRNA-splicing factor CWC22 homolog	Cwc22;mKIAA1604;Gm13695;Gm13697	tr|B1AYU4|B1AYU4_MOUSE Pre-mRNA-splicing factor CWC22 homolog OS=Mus musculus GN=Cwc22 PE=1 SV=1;tr|B1AYU7|B1AYU7_MOUSE Pre-mRNA-splicing factor CWC22 homolog OS=Mus musculus GN=Cwc22 PE=1 SV=1;tr|Q6ZPL7|Q6ZPL7_MOUSE MKIAA1604 protein (Fragment) OS=Mus mus	30491000	33957000	45211000	302710000	197270000	129310000	31611000	33465000	15611000	19515000	725970	808500	1076500	7207300	4696800	3078700	752650	796790	371690	24386000	72716000	284200000	258140000	337610000	306690000	52668000	38598000	45364000	15	15	15	23	23	23	82.752	0	59.348	819630000	37	7	6	7	14	10
572	B1AZ39;P0C0A3;B1AZ42;B1AZ41;Q3TS10	B1AZ39;P0C0A3	Charged multivesicular body protein 6	Chmp6	tr|B1AZ39|B1AZ39_MOUSE Chromatin modifying protein 6 OS=Mus musculus GN=Chmp6 PE=2 SV=1;sp|P0C0A3|CHMP6_MOUSE Charged multivesicular body protein 6 OS=Mus musculus GN=Chmp6 PE=2 SV=2	118650000	72319000	50525000	160190000	140090000	48857000	386030000	197410000	187280000	123760000	10786000	6574500	4593200	14563000	12736000	4441500	35093000	17946000	17026000	205240000	157420000	215240000	142000000	191240000	66044000	310330000	153840000	331080000	5	5	5	33	33	33	23.415	0	45.822	1361400000	26	2	5	3	4	2
573	B1AZ46;Q3UKP6;Q8BKX1-3;Q8BKX1-2;Q8BKX1;Q3TV50	B1AZ46;Q3UKP6;Q8BKX1-3;Q8BKX1-2;Q8BKX1;Q3TV50	Brain-specific angiogenesis inhibitor 1-associated protein 2	Baiap2	tr|B1AZ46|B1AZ46_MOUSE Brain-specific angiogenesis inhibitor 1-associated protein 2 OS=Mus musculus GN=Baiap2 PE=1 SV=1;tr|Q3UKP6|Q3UKP6_MOUSE Putative uncharacterized protein OS=Mus musculus GN=Baiap2 PE=2 SV=1;sp|Q8BKX1-3|BAIP2_MOUSE Isoform 3 of Brain-s	1716400000	774020000	684780000	1144200000	923780000	412350000	3479800000	2309300000	1402600000	305890000	40868000	18429000	16304000	27243000	21995000	9817800	82853000	54984000	33395000	2344800000	2315800000	2397100000	1432500000	1349300000	1086700000	3584200000	3402400000	3626800000	30	30	2	63.3	63.3	5.2	57.681	0	288.95	12847000000	321	24	24	23	20	20
574	D3YWD3;B1AZA5;B1AZA8;Q8C3N3	D3YWD3;B1AZA5	Transmembrane protein 245	Tmem245	tr|D3YWD3|D3YWD3_MOUSE Transmembrane protein 245 OS=Mus musculus GN=Tmem245 PE=1 SV=1;sp|B1AZA5|TM245_MOUSE Transmembrane protein 245 OS=Mus musculus GN=Tmem245 PE=1 SV=1	49089000	46133000	27704000	91295000	104760000	48871000	73098000	336850000	25749000	29761000	1818100	1708600	1026100	3381300	3880100	1810000	2707300	12476000	953680	114400000	154050000	163990000	160990000	179480000	205150000	136740000	142680000	170110000	7	7	7	10.6	10.6	10.6	97.73	0	23.553	803550000	26	5	5	4	5	4
575	B1AZF9;Q80YE4-2;B1AZF3;Q80YE4;Q80YE4-3;Q80YE4-4	B1AZF9;Q80YE4-2;B1AZF3;Q80YE4;Q80YE4-3;Q80YE4-4	Serine/threonine-protein kinase LMTK1	Aatk	tr|B1AZF9|B1AZF9_MOUSE Apoptosis-associated tyrosine kinase OS=Mus musculus GN=Aatk PE=3 SV=1;sp|Q80YE4-2|LMTK1_MOUSE Isoform 2 of Serine/threonine-protein kinase LMTK1 OS=Mus musculus GN=Aatk;tr|B1AZF3|B1AZF3_MOUSE Serine/threonine-protein kinase LMTK1 OS	143280000	76505000	36583000	226410000	158900000	384740000	179140000	132320000	27297000	27303000	2865600	1530100	731670	4528100	3177900	7694700	3582700	2646300	545940	332660000	309010000	359150000	338220000	253350000	360110000	326570000	262690000	243290000	17	17	17	21.3	21.3	21.3	139.45	0	42.116	1365200000	60	10	10	6	15	14
576	B1AZI6;Q3US09;E9Q5E2;Q3UYT9;Q3UUT9;F6SBF2;Q8C690;Q3TPY8;F6QCT0;B1AZI7;F6RBN0	B1AZI6;Q3US09	THO complex subunit 2	Thoc2	sp|B1AZI6|THOC2_MOUSE THO complex subunit 2 OS=Mus musculus GN=Thoc2 PE=1 SV=1;tr|Q3US09|Q3US09_MOUSE Putative uncharacterized protein (Fragment) OS=Mus musculus GN=Thoc2 PE=2 SV=1	384890000	182810000	96969000	1019500000	817310000	361480000	145680000	78765000	42104000	35971000	4424000	2101300	1114600	11718000	9394400	4155000	1674500	905340	483960	589980000	676420000	518470000	1143800000	1173500000	1039000000	209610000	219600000	182750000	31	31	31	23.7	23.7	23.7	182.77	0	153.3	3129500000	129	23	20	9	28	23
577	B7ZNS2;B1AZP2;Q3UCF7;B1AZP2-3;E9PUF2;I1E4X0;F6YMR0;H3BJD4;H3BJW9;H3BKJ0	B7ZNS2;B1AZP2;Q3UCF7;B1AZP2-3	Disks large-associated protein 4	Dlgap4	tr|B7ZNS2|B7ZNS2_MOUSE Disks large-associated protein 4 OS=Mus musculus GN=Dlgap4 PE=1 SV=1;sp|B1AZP2|DLGP4_MOUSE Disks large-associated protein 4 OS=Mus musculus GN=Dlgap4 PE=1 SV=1;tr|Q3UCF7|Q3UCF7_MOUSE Putative uncharacterized protein (Fragment) OS=Mus	20335000	5040800	0	14418000	6153400	0	0	0	0	900920	398720	98839	0	282710	120650	0	0	0	0	45753000	0	0	0	0	0	0	0	0	24	1	1	37.7	1.6	1.6	106.17	0.0013978	2.9834	45947000	2	19	18	15	15	16
578	B1AZP2-2	B1AZP2-2	Disks large-associated protein 4	Dlgap4	sp|B1AZP2-2|DLGP4_MOUSE Isoform 2 of Disks large-associated protein 4 OS=Mus musculus GN=Dlgap4	336490000	167100000	135270000	162850000	195130000	112620000	894920000	595080000	286550000	58898000	6867100	3410200	2760500	3323400	3982300	2298400	18264000	12144000	5848000	388400000	487650000	544860000	218060000	286300000	288110000	748890000	810270000	824780000	24	22	1	37.7	36.8	2.1	107.55	0	228.89	2886000000	124	18	18	15	15	16
579	Q3TSV2;Q8BUX1;Q8BLJ6;Q6PGA3;B1AZQ9;B1AZR0;Q811G7;A4FTZ1	Q3TSV2;Q8BUX1;Q8BLJ6;Q6PGA3;B1AZQ9;B1AZR0;Q811G7;A4FTZ1		Klhl4	tr|Q3TSV2|Q3TSV2_MOUSE Klhl4 protein OS=Mus musculus GN=Klhl4 PE=2 SV=1;tr|Q8BUX1|Q8BUX1_MOUSE Protein Klhl4 OS=Mus musculus GN=Klhl4 PE=2 SV=1;tr|Q8BLJ6|Q8BLJ6_MOUSE Kelch-like 4 (Drosophila), isoform CRA_c (Fragment) OS=Mus musculus GN=Klhl4 PE=2 SV=1;tr	0	474800	0	12342000	7753000	0	16794000	13494000	2659200	1372200	0	12174	0	316450	198790	0	430630	346010	68185	0	0	0	0	0	0	0	18152000	0	2	2	2	4.6	4.6	4.6	64.845	0.0035299	2	53517000	3	0	1	0	2	2
580	B1B1A8;Q6PDN3;Q6PDN3-3;Q6PDN3-2;Q6PDN3-4	B1B1A8;Q6PDN3;Q6PDN3-3;Q6PDN3-2	Myosin light chain kinase, smooth muscle;Myosin light chain kinase, smooth muscle, deglutamylated form	Mylk	tr|B1B1A8|B1B1A8_MOUSE Myosin light chain kinase, smooth muscle OS=Mus musculus GN=Mylk PE=1 SV=1;sp|Q6PDN3|MYLK_MOUSE Myosin light chain kinase, smooth muscle OS=Mus musculus GN=Mylk PE=1 SV=3;sp|Q6PDN3-3|MYLK_MOUSE Isoform 3 of Myosin light chain kinase,	190600000	60363000	25517000	112460000	57193000	29519000	289390000	203540000	87276000	8584200	1549600	490750	207450	914290	464990	239990	2352800	1654800	709560	158800000	311480000	143530000	56184000	139490000	88984000	298800000	477440000	317980000	11	11	11	6.7	6.7	6.7	213.61	0	18.332	1055900000	48	5	4	3	4	2
581	B1B1B8;Q2M3X8-2;Q2M3X8;Q2M3X8-3;Q2M3X8-4	B1B1B8;Q2M3X8-2;Q2M3X8;Q2M3X8-3;Q2M3X8-4	Phosphatase and actin regulator;Phosphatase and actin regulator 1	Phactr1	tr|B1B1B8|B1B1B8_MOUSE Phosphatase and actin regulator OS=Mus musculus GN=Phactr1 PE=3 SV=1;sp|Q2M3X8-2|PHAR1_MOUSE Isoform 2 of Phosphatase and actin regulator 1 OS=Mus musculus GN=Phactr1;sp|Q2M3X8|PHAR1_MOUSE Phosphatase and actin regulator 1 OS=Mus mus	2589400	1853300	8970700	6571600	4847700	5787200	8275800	12905000	5647400	1981000	89289	63906	309340	226610	167160	199560	285370	445000	194740	0	0	0	12369000	0	0	10771000	12276000	11468000	4	2	2	6.8	4.3	4.3	63.109	0.0016529	2.6937	57448000	7	2	1	1	4	3
582	B1B1D8;Q9D773;B1B1D7	B1B1D8;Q9D773	39S ribosomal protein L2, mitochondrial	Mrpl2	tr|B1B1D8|B1B1D8_MOUSE 39S ribosomal protein L2, mitochondrial OS=Mus musculus GN=Mrpl2 PE=4 SV=1;sp|Q9D773|RM02_MOUSE 39S ribosomal protein L2, mitochondrial OS=Mus musculus GN=Mrpl2 PE=2 SV=1	151020000	22220000	24052000	180770000	104260000	30981000	115030000	75383000	26662000	38441000	7948400	1169500	1265900	9514200	5487500	1630600	6054200	3967500	1403300	170400000	69830000	123770000	151230000	125620000	100770000	147400000	105240000	105810000	7	7	7	30.9	30.9	30.9	33.099	0	101.62	730380000	39	5	5	4	6	5
583	B1GX80;B1GX81;Q61036-2;Q61036;A3KGC5;A3KGC4;A3KGC3;A3KGC2	B1GX80;B1GX81;Q61036-2;Q61036;A3KGC5	Non-specific serine/threonine protein kinase;Serine/threonine-protein kinase PAK 3	Pak3	tr|B1GX80|B1GX80_MOUSE PAK3c protein OS=Mus musculus GN=Pak3 PE=2 SV=1;tr|B1GX81|B1GX81_MOUSE PAK3cb protein OS=Mus musculus GN=Pak3 PE=2 SV=1;sp|Q61036-2|PAK3_MOUSE Isoform 2 of Serine/threonine-protein kinase PAK 3 OS=Mus musculus GN=Pak3;sp|Q61036|PAK3_	10669000	8088600	8822900	31605000	629670	65136000	225900	0	9967100	4504800	355650	269620	294100	1053500	20989	2171200	7530	0	332240	36174000	28599000	52343000	38663000	0	118350000	0	0	23180000	15	3	3	27.1	8.3	8.3	63.001	0	21.991	135140000	13	14	15	11	15	14
584	S4R1B9;B1Q2W7;D3YZK4;Q80UV9-3;Q80UV9;Q80UV9-2;A0A067XG50	S4R1B9;B1Q2W7;D3YZK4;Q80UV9-3;Q80UV9;Q80UV9-2	Transcription initiation factor TFIID subunit 1	Taf1	tr|S4R1B9|S4R1B9_MOUSE Transcription initiation factor TFIID subunit 1 OS=Mus musculus GN=Taf1 PE=1 SV=1;tr|B1Q2W7|B1Q2W7_MOUSE TAF1 RNA polymerase II, TATA box binding protein (TBP)-associated factor, neuron specific isoform OS=Mus musculus GN=Taf1 PE=2 S	5861300	3008000	4254900	29516000	38976000	11011000	2677500	4184700	0	1170500	68957	35388	50058	347240	458540	129550	31500	49232	0	15157000	0	0	27037000	27684000	28779000	0	0	0	6	6	6	5	5	5	197.37	0.00058156	3.7229	99490000	8	3	1	2	5	6
585	Q3TW70;Q3TWK8;B2CQD6;Q08879	Q3TW70;Q3TWK8;B2CQD6;Q08879	Fibulin-1	Fbln1	tr|Q3TW70|Q3TW70_MOUSE Putative uncharacterized protein (Fragment) OS=Mus musculus GN=Fbln1 PE=2 SV=1;tr|Q3TWK8|Q3TWK8_MOUSE Fibulin-1 OS=Mus musculus GN=Fbln1 PE=2 SV=1;tr|B2CQD6|B2CQD6_MOUSE Fibulin-1 OS=Mus musculus GN=Fbln1 PE=2 SV=1;sp|Q08879|FBLN1_MO	0	0	837150	12017000	10627000	14400000	0	0	0	2525400	0	0	55810	801160	708470	959980	0	0	0	0	0	0	10721000	0	46179000	0	0	0	1	1	1	10.1	10.1	10.1	25.733	0.0061123	1.6931	37881000	2	0	0	1	1	1
586	B2CY77;P14206	B2CY77;P14206	40S ribosomal protein SA	Rpsa	tr|B2CY77|B2CY77_MOUSE Laminin receptor (Fragment) OS=Mus musculus GN=Rpsa PE=2 SV=1;sp|P14206|RSSA_MOUSE 40S ribosomal protein SA OS=Mus musculus GN=Rpsa PE=1 SV=4	4932200000	2990100000	2229200000	12019000000	5699700000	3872900000	4221700000	2265500000	1000000000	2615400000	328810000	199340000	148610000	801290000	379980000	258200000	281450000	151030000	66669000	7875400000	8674400000	9085700000	10495000000	7858600000	9991999000	4167200000	4019800000	3892300000	14	14	14	58	58	58	32.85	0	323.31	39231000000	525	13	12	12	12	13
587	B2KF50;Q570Z6;REV__Q9CXP8	B2KF50;Q570Z6		Uhrf1bp1	tr|B2KF50|B2KF50_MOUSE Protein Uhrf1bp1 OS=Mus musculus GN=Uhrf1bp1 PE=1 SV=1;tr|Q570Z6|Q570Z6_MOUSE MKIAA4127 protein (Fragment) OS=Mus musculus GN=Uhrf1bp1 PE=2 SV=1	81429000	44057000	21959000	89664000	101150000	48270000	290830000	160770000	72066000	11669000	1044000	564840	281520	1149500	1296800	618850	3728600	2061100	923930	136140000	167190000	146320000	90422000	110350000	108120000	253370000	238740000	209150000	24	21	21	18.5	17.2	17.2	157.01	0	44.363	910190000	68	16	15	10	17	18
588	B2KFS7;Q8JZU3;Q8BFQ9	B2KFS7;Q8JZU3;Q8BFQ9	Kelch-like protein 42	Klhl42	tr|B2KFS7|B2KFS7_MOUSE Kelch domain containing 5 OS=Mus musculus GN=Klhl42 PE=2 SV=1;tr|Q8JZU3|Q8JZU3_MOUSE Klhdc5 protein (Fragment) OS=Mus musculus GN=Klhl42 PE=2 SV=1;sp|Q8BFQ9|KLH42_MOUSE Kelch-like protein 42 OS=Mus musculus GN=Klhl42 PE=2 SV=1	8766700	2022300	0	10265000	11990000	2020000	13596000	11231000	0	2395600	350670	80892	0	410580	479610	80801	543860	449240	0	11834000	0	0	12911000	15205000	0	13811000	13613000	0	3	3	3	7.3	7.3	7.3	55.598	0.00015232	4.7699	59891000	10	2	1	0	2	2
589	B2KFW6;Q9QWH1-2;Q9QWH1;B1ASA3;B1ASA2	B2KFW6;Q9QWH1-2;Q9QWH1	Polyhomeotic-like protein 2	Phc2	tr|B2KFW6|B2KFW6_MOUSE Polyhomeotic-like 2 (Drosophila) OS=Mus musculus GN=Phc2 PE=4 SV=1;sp|Q9QWH1-2|PHC2_MOUSE Isoform 2 of Polyhomeotic-like protein 2 OS=Mus musculus GN=Phc2;sp|Q9QWH1|PHC2_MOUSE Polyhomeotic-like protein 2 OS=Mus musculus GN=Phc2 PE=1	76478000	36245000	21207000	217620000	190610000	96864000	19234000	10321000	1579900	16754000	1911900	906140	530170	5440500	4765300	2421600	480840	258010	39497	47627000	69886000	78594000	246910000	196020000	219100000	23761000	21912000	0	9	9	8	12.4	12.4	10.8	89.754	0	25.73	670160000	29	6	5	3	8	8
590	B2KGA7;Q505B7-2;Q505B7;A8Y5E9	B2KGA7;Q505B7-2;Q505B7;A8Y5E9	Protein archease	Zbtb8os	tr|B2KGA7|B2KGA7_MOUSE Protein archease OS=Mus musculus GN=Zbtb8os PE=4 SV=1;sp|Q505B7-2|ARCH_MOUSE Isoform 2 of Protein archease OS=Mus musculus GN=Zbtb8os;sp|Q505B7|ARCH_MOUSE Protein archease OS=Mus musculus GN=Zbtb8os PE=2 SV=2;tr|A8Y5E9|A8Y5E9_MOUSE P	0	2471300	0	0	15575000	5311300	38008000	27718000	12937000	10202000	0	247130	0	0	1557500	531130	3800800	2771800	1293700	0	0	0	0	13562000	0	33270000	32742000	29167000	2	2	2	13.2	13.2	13.2	19.58	0.00086593	3.5433	102020000	8	0	1	0	0	2
591	Q3UDM8;B2KGF0;Q8VEE0;M0QWJ2;M0QWQ0;Q91VZ4;Q62505	Q3UDM8;B2KGF0;Q8VEE0	Ribulose-phosphate 3-epimerase	Rpe	tr|Q3UDM8|Q3UDM8_MOUSE Ribulose-phosphate 3-epimerase OS=Mus musculus GN=Rpe PE=2 SV=1;tr|B2KGF0|B2KGF0_MOUSE Ribulose-phosphate 3-epimerase OS=Mus musculus GN=Rpe PE=3 SV=1;sp|Q8VEE0|RPE_MOUSE Ribulose-phosphate 3-epimerase OS=Mus musculus GN=Rpe PE=2 SV=	41111000	33355000	25977000	39160000	34352000	30626000	66323000	51031000	59199000	34648000	3737400	3032200	2361600	3560000	3122900	2784200	6029400	4639100	5381700	79638000	87163000	103860000	0	94900000	176690000	123190000	150030000	306190000	4	4	4	21.9	21.9	21.9	24.961	0	42.826	381130000	16	1	2	3	1	1
592	B2KGP3;Q80TL0	B2KGP3;Q80TL0	Protein phosphatase 1E	Ppm1e	tr|B2KGP3|B2KGP3_MOUSE Protein phosphatase 1E (PP2C domain containing) OS=Mus musculus GN=Ppm1e PE=2 SV=1;sp|Q80TL0|PPM1E_MOUSE Protein phosphatase 1E OS=Mus musculus GN=Ppm1e PE=1 SV=2	228970000	78008000	38425000	386270000	198700000	129300000	133620000	73845000	72000000	38261000	6541900	2228800	1097900	11036000	5677100	3694400	3817800	2109900	2057100	262610000	185670000	265330000	434470000	240630000	281210000	167330000	124720000	204600000	10	10	10	17.8	17.8	17.8	83.418	0	37.13	1339100000	54	9	7	3	8	7
593	B2L107	B2L107		Vsnl1	tr|B2L107|B2L107_MOUSE Visinin-like protein 1 OS=Mus musculus GN=Vsnl1 PE=2 SV=1	40857000	11636000	10610000	110850000	100800000	35131000	63793000	59653000	25834000	30611000	2723800	775750	707360	7390000	6720300	2342000	4252900	3976900	1722300	0	0	0	34386000	0	34968000	108440000	0	0	22	2	2	93.2	11.5	11.5	22.124	0.001782	2.631	459170000	30	18	16	16	21	21
594	B2LVG5;B2LVG6;E0CXT7;Q8BQZ5;F7B6Z5;Q8BQZ5-3;Q8BQZ5-2;M0QWM8	B2LVG5;B2LVG6;E0CXT7;Q8BQZ5;F7B6Z5;Q8BQZ5-3;Q8BQZ5-2	Cleavage and polyadenylation specificity factor subunit 4	Cpsf4	tr|B2LVG5|B2LVG5_MOUSE Cleavage and polyadenylation specific factor 4 isoform 1 OS=Mus musculus GN=Cpsf4 PE=2 SV=1;tr|B2LVG6|B2LVG6_MOUSE Cleavage and polyadenylation specific factor 4 isoform 2 OS=Mus musculus GN=Cpsf4 PE=2 SV=1;tr|E0CXT7|E0CXT7_MOUSE Cle	45664000	20761000	16760000	101950000	62842000	53203000	10013000	10846000	1287800	19019000	2686100	1221300	985900	5996800	3696600	3129600	588990	637990	75752	78406000	64175000	62385000	97879000	124830000	151290000	21474000	20887000	0	5	5	5	30.9	30.9	30.9	27.419	0.00015321	4.901	323320000	19	5	3	4	5	4
595	B2M0S2;B2M0S3;D3Z4P7;Q91YR2;F8WHX0;E9Q5Y1;B2M0S4;O35491	B2M0S2;B2M0S3		Tu52	tr|B2M0S2|B2M0S2_MOUSE Clk2-Scamp3 protein OS=Mus musculus GN=Tu52 PE=2 SV=1;tr|B2M0S3|B2M0S3_MOUSE TU52 isoform A OS=Mus musculus GN=Tu52 PE=2 SV=1	0	0	0	4701700	7492000	0	0	0	0	304840	0	0	0	117540	187300	0	0	0	0	0	0	0	0	8057300	0	0	0	0	8	1	1	11.5	1.8	1.8	88.936	0.0042718	1.8746	12194000	2	7	7	5	7	7
596	B2M1R6;P61979-3;Q3TL71;Q3U9Q3;Q3U6X2;H3BKD0;D3Z5X4;H3BKI8;H3BLP7;H3BJS9;Q8BT23;H3BJ43	B2M1R6;P61979-3;Q3TL71;Q3U9Q3;Q3U6X2;H3BKD0;D3Z5X4	Heterogeneous nuclear ribonucleoprotein K	Hnrnpk;Gm7964	tr|B2M1R6|B2M1R6_MOUSE Heterogeneous nuclear ribonucleoprotein K OS=Mus musculus GN=Hnrnpk PE=1 SV=1;sp|P61979-3|HNRPK_MOUSE Isoform 3 of Heterogeneous nuclear ribonucleoprotein K OS=Mus musculus GN=Hnrnpk;tr|Q3TL71|Q3TL71_MOUSE Putative uncharacterized pr	20673000000	9621400000	8025500000	39858000000	22256000000	17503000000	7670000000	4555400000	3652400000	4779100000	738340000	343620000	286620000	1423500000	794860000	625100000	273930000	162690000	130440000	30382000000	27964000000	22402000000	43841000000	35085000000	36089000000	9988801000	9223100000	7176500000	33	33	2	66.8	66.8	3	48.562	0	323.31	133810000000	1327	28	27	26	31	30
597	B2M1R7;Q61990-3;Q3TF69	B2M1R7;Q61990-3;Q3TF69	Poly(rC)-binding protein 2	Pcbp2	tr|B2M1R7|B2M1R7_MOUSE Poly(RC) binding protein 2 OS=Mus musculus GN=Pcbp2 PE=2 SV=1;sp|Q61990-3|PCBP2_MOUSE Isoform 3 of Poly(rC)-binding protein 2 OS=Mus musculus GN=Pcbp2;tr|Q3TF69|Q3TF69_MOUSE Putative uncharacterized protein OS=Mus musculus GN=Pcbp2 P	7950000	0	0	184420000	162920000	103800000	0	6109800	0	23260000	397500	0	0	9221000	8145900	5190100	0	305490	0	0	0	0	0	0	0	0	6728300	0	18	1	1	66.5	8	8	38.15	0	37.26	465200000	4	16	17	16	18	18
598	Q3UWP8;B2MWM9;P14211	Q3UWP8;B2MWM9;P14211	Calreticulin	Calr	tr|Q3UWP8|Q3UWP8_MOUSE Putative uncharacterized protein (Fragment) OS=Mus musculus GN=Calr PE=2 SV=1;tr|B2MWM9|B2MWM9_MOUSE Calreticulin OS=Mus musculus GN=Calr PE=2 SV=1;sp|P14211|CALR_MOUSE Calreticulin OS=Mus musculus GN=Calr PE=1 SV=1	6006400000	2372800000	1566500000	6881200000	5901100000	3771900000	5146900000	3443100000	2101400000	1487700000	240250000	94914000	62660000	275250000	236050000	150870000	205880000	137720000	84057000	6809500000	4609400000	4140700000	6259400000	6269900000	5978000000	4540400000	4614300000	4176000000	25	25	25	66	66	66	42.195	0	323.31	37191000000	517	22	20	19	25	24
599	B2RPS1;Q0PD56;P61021;Q8C458	B2RPS1;Q0PD56;P61021;Q8C458	Ras-related protein Rab-5B	Rab5b	tr|B2RPS1|B2RPS1_MOUSE RAB5B, member RAS oncogene family OS=Mus musculus GN=Rab5b PE=2 SV=1;tr|Q0PD56|Q0PD56_MOUSE Rab5B OS=Mus musculus GN=Rab5b PE=2 SV=1;sp|P61021|RAB5B_MOUSE Ras-related protein Rab-5B OS=Mus musculus GN=Rab5b PE=1 SV=1;tr|Q8C458|Q8C458	1186000000	440520000	556040000	1213500000	923120000	895100000	1708000000	1117100000	772820000	629440000	84714000	31466000	39717000	86676000	65937000	63936000	122000000	79789000	55201000	1428800000	1459100000	2364900000	1229700000	805270000	1432100000	1731500000	1531500000	2045000000	9	6	6	60.9	46	46	23.707	0	212.82	8812100000	152	8	8	8	9	9
600	B2RPU2	B2RPU2	Pleckstrin homology domain-containing family D member 1	Plekhd1	sp|B2RPU2|PLHD1_MOUSE Pleckstrin homology domain-containing family D member 1 OS=Mus musculus GN=Plekhd1 PE=2 SV=1	509520000	184100000	207080000	79798000	78275000	100110000	964270000	734430000	483410000	104410000	15923000	5753000	6471200	2493700	2446100	3128300	30133000	22951000	15107000	831790000	615310000	581250000	206570000	209280000	207010000	956790000	1034200000	978350000	17	17	17	39	39	39	59.096	0	42.531	3341000000	92	12	13	12	3	8
601	E9PW14;B7SNM8;B2RPU6;B7ZMS8;Q9D067-2;Q9D067;E9Q0B1;B7SNM9;Q9D067-4;Q9D067-3	E9PW14;B7SNM8;B2RPU6;B7ZMS8;Q9D067-2;Q9D067;E9Q0B1;B7SNM9;Q9D067-4;Q9D067-3	Nuclear protein MDM1	Mdm1	tr|E9PW14|E9PW14_MOUSE Nuclear protein MDM1 OS=Mus musculus GN=Mdm1 PE=4 SV=1;tr|B7SNM8|B7SNM8_MOUSE MDM1 variant 1 OS=Mus musculus GN=Mdm1 PE=2 SV=1;tr|B2RPU6|B2RPU6_MOUSE Mdm1 protein OS=Mus musculus GN=Mdm1 PE=2 SV=1;tr|B7ZMS8|B7ZMS8_MOUSE Mdm1 protein	21540000	10927000	934140	46585000	69534000	29811000	9648100	1995700	1859000	3935400	439590	222990	19064	950720	1419100	608390	196900	40729	37939	35895000	37397000	0	45912000	71556000	53215000	0	0	0	6	6	6	11.9	11.9	11.9	77.371	0	5.4818	192830000	12	5	5	1	6	5
602	B2RPV4;Q66JV4;Q66JV4-2	B2RPV4;Q66JV4;Q66JV4-2	RNA-binding protein 12B-B	Rbm12b2	tr|B2RPV4|B2RPV4_MOUSE C430048L16Rik protein OS=Mus musculus GN=Rbm12b2 PE=2 SV=1;sp|Q66JV4|R12BB_MOUSE RNA-binding protein 12B-B OS=Mus musculus GN=Rbm12b2 PE=2 SV=2;sp|Q66JV4-2|R12BB_MOUSE Isoform 2 of RNA-binding protein 12B-B OS=Mus musculus GN=Rbm12b2	26310000	13933000	43835000	58682000	72500000	46362000	11368000	11047000	142670000	7232300	445940	236160	742970	994600	1228800	785800	192680	187240	2418100	83970000	110620000	85571000	187890000	190480000	196320000	22838000	45069000	90580000	12	12	3	16.8	16.8	4.6	96.423	0	10.318	426710000	30	6	6	3	8	8
603	B2RPW2;Q8BGV8	B2RPW2;Q8BGV8	Mitochondrial dynamics protein MID51	Mief1	tr|B2RPW2|B2RPW2_MOUSE Smith-Magenis syndrome chromosome region, candidate 7-like (Human) OS=Mus musculus GN=Mief1 PE=2 SV=1;sp|Q8BGV8|MID51_MOUSE Mitochondrial dynamics protein MID51 OS=Mus musculus GN=Mief1 PE=1 SV=1	73138000	12189000	9808100	60515000	67663000	30302000	99882000	53354000	29328000	17447000	2925500	487540	392320	2420600	2706500	1212100	3995300	2134200	1173100	73761000	71148000	68287000	69054000	77838000	63967000	86278000	84711000	78062000	13	13	13	31.5	31.5	31.5	51.183	0	14.132	436180000	31	9	4	4	8	10
604	B2RQ13;B7ZMW5;B7ZMW4;P70261	B2RQ13;B7ZMW5;B7ZMW4;P70261	Paladin	Pald1	tr|B2RQ13|B2RQ13_MOUSE X99384 protein OS=Mus musculus GN=Pald1 PE=2 SV=1;tr|B7ZMW5|B7ZMW5_MOUSE cDNA sequence X99384 OS=Mus musculus GN=Pald1 PE=2 SV=1;tr|B7ZMW4|B7ZMW4_MOUSE X99384 protein OS=Mus musculus GN=Pald1 PE=2 SV=1;sp|P70261|PALD_MOUSE Paladin OS	56292000	37621000	31062000	67746000	70099000	69598000	196040000	118770000	80365000	13229000	1023500	684020	564760	1231700	1274500	1265400	3564300	2159500	1461200	67699000	87765000	205430000	73550000	97669000	101050000	156660000	186150000	221680000	16	16	16	26	26	26	96.589	0	58.662	727600000	52	7	9	3	8	7
605	B2RQ14;Q8CDA1;Q8CDA1-2;Q8CDA1-3;Q8CA68;Q8CDA1-4	B2RQ14;Q8CDA1	Phosphatidylinositide phosphatase SAC2	Inpp5f	tr|B2RQ14|B2RQ14_MOUSE Inositol polyphosphate-5-phosphatase F OS=Mus musculus GN=Inpp5f PE=2 SV=1;sp|Q8CDA1|SAC2_MOUSE Phosphatidylinositide phosphatase SAC2 OS=Mus musculus GN=Inpp5f PE=1 SV=1	179260000	92594000	50605000	330560000	320060000	129310000	374640000	289990000	127980000	27071000	2560900	1322800	722930	4722300	4572200	1847200	5352000	4142700	1828300	326670000	288070000	290070000	397870000	382190000	339520000	418350000	403000000	322460000	27	27	27	27.7	27.7	27.7	127.61	0	38.274	1895000000	102	18	20	12	21	21
606	B2RQ18;Q6P9Q6;Q6P9Q6-2;Q80YW9;Q80YW7;Q80YW6	B2RQ18;Q6P9Q6;Q6P9Q6-2;Q80YW9;Q80YW7;Q80YW6	Peptidyl-prolyl cis-trans isomerase;FK506-binding protein 15	Fkbp15	tr|B2RQ18|B2RQ18_MOUSE Peptidyl-prolyl cis-trans isomerase OS=Mus musculus GN=Fkbp15 PE=2 SV=1;sp|Q6P9Q6|FKB15_MOUSE FK506-binding protein 15 OS=Mus musculus GN=Fkbp15 PE=1 SV=2;sp|Q6P9Q6-2|FKB15_MOUSE Isoform B of FK506-binding protein 15 OS=Mus musculus	36449000	36827000	31220000	142780000	122160000	60782000	71332000	41773000	17620000	9047500	587880	593990	503550	2302900	1970300	980360	1150500	673750	284200	123760000	97384000	152210000	153310000	95975000	88564000	111010000	102860000	122200000	11	11	11	14	14	14	131.78	0	20.943	560940000	27	6	7	6	6	9
607	Q05D93;Q8BR30;B2RQ36;Q8R4C2;Q8C424;Q9CSV9;D3Z4D2;D6RET4;D3Z7T9	Q05D93;Q8BR30;B2RQ36;Q8R4C2;Q8C424;Q9CSV9;D3Z4D2;D6RET4	RUN and FYVE domain-containing protein 2	Rufy2	tr|Q05D93|Q05D93_MOUSE Rufy2 protein (Fragment) OS=Mus musculus GN=Rufy2 PE=2 SV=1;tr|Q8BR30|Q8BR30_MOUSE RUN and FYVE domain-containing protein 2 OS=Mus musculus GN=Rufy2 PE=2 SV=1;tr|B2RQ36|B2RQ36_MOUSE RUN and FYVE domain-containing 2 OS=Mus musculus GN	42314000	16965000	8303100	70270000	40959000	19147000	97984000	33684000	18469000	10548000	1282200	514100	251610	2129400	1241200	580220	2969200	1020700	559670	58195000	0	0	50378000	51296000	49607000	86371000	63799000	68915000	13	10	10	35.6	27.6	27.6	45.969	0	14.652	348090000	28	9	3	3	12	10
608	B2RQ68;B7ZW89;Q8R4U7;Q05CE8;Q6KAP6;E9Q9L3	B2RQ68;B7ZW89;Q8R4U7;Q05CE8;Q6KAP6	Leucine zipper protein 1	Luzp1;mFLJ00226	tr|B2RQ68|B2RQ68_MOUSE Luzp1 protein OS=Mus musculus GN=Luzp1 PE=2 SV=1;tr|B7ZW89|B7ZW89_MOUSE Uncharacterized protein OS=Mus musculus GN=Luzp1 PE=2 SV=1;sp|Q8R4U7|LUZP1_MOUSE Leucine zipper protein 1 OS=Mus musculus GN=Luzp1 PE=1 SV=2;tr|Q05CE8|Q05CE8_MOU	87591000	43275000	3180500	117510000	100370000	85154000	135300000	106660000	19422000	9978100	1251300	618220	45436	1678800	1433800	1216500	1932900	1523700	277460	79298000	62344000	38483000	107860000	85838000	94672000	75300000	107100000	101860000	10	10	10	11.9	11.9	11.9	119.26	0	31.695	698460000	21	6	4	2	6	9
609	B2RQ71;E9PWR4;Q69ZV2;Q6PGL8;Q5EBR0;Q6NY04;Q8CBE5	B2RQ71;E9PWR4;Q69ZV2;Q6PGL8;Q5EBR0;Q6NY04		Dip2c	tr|B2RQ71|B2RQ71_MOUSE Dip2c protein OS=Mus musculus GN=Dip2c PE=2 SV=1;tr|E9PWR4|E9PWR4_MOUSE Protein Dip2c OS=Mus musculus GN=Dip2c PE=4 SV=1;tr|Q69ZV2|Q69ZV2_MOUSE MKIAA0934 protein (Fragment) OS=Mus musculus GN=Dip2c PE=2 SV=1;tr|Q6PGL8|Q6PGL8_MOUSE Di	485370000	180700000	70636000	544650000	376660000	201290000	783220000	525670000	410990000	44740000	6067100	2258800	882960	6808100	4708300	2516100	9790200	6570900	5137300	701880000	570740000	613160000	592190000	650800000	578210000	1087700000	871810000	928440000	43	31	2	34.4	24.9	1.3	170.92	0	153.03	3579200000	175	37	35	21	36	32
610	B9EJA5;B2RQ76;Q9JHA8	B9EJA5;B2RQ76;Q9JHA8	von Willebrand factor A domain-containing protein 7	Vwa7	tr|B9EJA5|B9EJA5_MOUSE D17H6S56E-3 protein OS=Mus musculus GN=Vwa7 PE=2 SV=1;tr|B2RQ76|B2RQ76_MOUSE DNA segment, Chr 17, human D6S56E 3 OS=Mus musculus GN=Vwa7 PE=2 SV=1;sp|Q9JHA8|VWA7_MOUSE von Willebrand factor A domain-containing protein 7 OS=Mus muscul	17050000	8276900	10799000	46888000	57715000	32188000	61075000	63208000	10536000	9051100	501460	243440	317620	1379100	1697500	946700	1796300	1859100	309900	45932000	39170000	62121000	44630000	65066000	61251000	40719000	64115000	50296000	11	11	11	17.9	17.9	17.9	93.718	0	27.369	307740000	25	5	4	4	7	7
611	B2RQ80;E9PUL9;B9EKN8;E0CY98;B2RXX2;P83510;E0CZD7;E0CXD6;P83510-2;E0CZF8;B2RY17;E0CYV5	B2RQ80;E9PUL9;B9EKN8;E0CY98;B2RXX2;P83510;E0CZD7;E0CXD6;P83510-2;E0CZF8;B2RY17	Traf2 and NCK-interacting protein kinase	Tnik	tr|B2RQ80|B2RQ80_MOUSE Tnik protein OS=Mus musculus GN=Tnik PE=2 SV=1;tr|E9PUL9|E9PUL9_MOUSE Traf2 and NCK-interacting protein kinase OS=Mus musculus GN=Tnik PE=4 SV=1;tr|B9EKN8|B9EKN8_MOUSE TRAF2 and NCK interacting kinase OS=Mus musculus GN=Tnik PE=2 SV=	244620000	97078000	50695000	183230000	254410000	124900000	479600000	342340000	173140000	27465000	3445300	1367300	714010	2580800	3583300	1759100	6755000	4821600	2438600	393330000	429970000	393610000	260170000	316990000	339720000	543710000	563450000	577260000	30	18	18	25.9	18	18	154.94	0	88.147	1950000000	97	23	21	16	22	24
612	Q8C000;B2RQA0	Q8C000;B2RQA0		Gm5124	tr|Q8C000|Q8C000_MOUSE Putative uncharacterized protein OS=Mus musculus GN=Gm5124 PE=2 SV=1;tr|B2RQA0|B2RQA0_MOUSE EG331392 protein OS=Mus musculus GN=Gm5124 PE=2 SV=1	46812000	1987500	8161100	63256000	38370000	42740000	14180000	9282200	12641000	8793800	1733800	73609	302260	2342800	1421100	1583000	525200	343790	468180	67989000	14880000	10423000	107910000	97037000	117910000	35536000	24189000	38217000	3	2	2	11.5	6.6	6.6	49.282	0	6.0558	237430000	16	3	2	3	3	2
613	E9QAI5;B2RQC6;G3UWN2;B2RQC6-2;Q6P9L1;E9QAT6;Q7TN13;Q80VF8;Q9CWQ9;F6S3Z3;O88862;Q561M8	E9QAI5;B2RQC6;G3UWN2;B2RQC6-2;Q6P9L1	CAD protein;Glutamine-dependent carbamoyl-phosphate synthase;Aspartate carbamoyltransferase;Dihydroorotase	Cad	tr|E9QAI5|E9QAI5_MOUSE CAD protein OS=Mus musculus GN=Cad PE=3 SV=1;sp|B2RQC6|PYR1_MOUSE CAD protein OS=Mus musculus GN=Cad PE=2 SV=1;tr|G3UWN2|G3UWN2_MOUSE CAD protein OS=Mus musculus GN=Cad PE=3 SV=1;sp|B2RQC6-2|PYR1_MOUSE Isoform 2 of CAD protein OS=Mus	628010000	343320000	189220000	532680000	536850000	240360000	1052300000	800960000	454870000	39821000	5233400	2861000	1576800	4439000	4473800	2003000	8769000	6674600	3790600	1026400000	1128800000	1168500000	599940000	648200000	599010000	1156800000	1151100000	1222500000	59	59	58	38.6	38.6	38.3	236.25	0	182.41	4778600000	295	45	42	30	47	46
614	B2RQC7;D3Z5G8;Q3UH60-2	B2RQC7;D3Z5G8;Q3UH60-2	Disco-interacting protein 2 homolog B	Dip2b	tr|B2RQC7|B2RQC7_MOUSE DIP2 disco-interacting protein 2 homolog B (Drosophila) OS=Mus musculus GN=Dip2b PE=2 SV=1;tr|D3Z5G8|D3Z5G8_MOUSE Disco-interacting protein 2 homolog B OS=Mus musculus GN=Dip2b PE=4 SV=1;sp|Q3UH60-2|DIP2B_MOUSE Isoform 2 of Disco-int	10724000	1228100	0	37544000	6952200	44748000	14552000	11633000	0	1698400	142980	16374	0	500580	92696	596640	194030	155110	0	0	0	0	37762000	0	0	0	0	0	56	1	1	52.8	1.9	1.9	146.7	0.00085837	3.3791	127380000	6	49	48	37	50	46
615	B2RQD1;Q99MX7	B2RQD1;Q99MX7	Cat eye syndrome critical region protein 6 homolog	Cecr6	tr|B2RQD1|B2RQD1_MOUSE Cat eye syndrome chromosome region, candidate 6 homolog (Human) OS=Mus musculus GN=Cecr6 PE=2 SV=1;sp|Q99MX7|CECR6_MOUSE Cat eye syndrome critical region protein 6 homolog OS=Mus musculus GN=Cecr6 PE=2 SV=1	16666000	6797700	5851900	10445000	12560000	8371400	22489000	19652000	22950000	5717400	757530	308990	266000	474750	570920	380520	1022200	893270	1043200	39318000	0	17912000	21470000	18029000	20550000	34432000	30646000	45659000	3	3	3	8.2	8.2	8.2	58.158	0	14.398	125780000	10	2	1	2	2	2
616	B2RQE3;A5CVE4;I1E4X8;B7ZN44;P83093;F6WBP9;Q8BIM2;Q8C4Z8	B2RQE3;A5CVE4;I1E4X8;B7ZN44;P83093	Stromal interaction molecule 2	Stim2	tr|B2RQE3|B2RQE3_MOUSE Stim2 protein OS=Mus musculus GN=Stim2 PE=2 SV=1;tr|A5CVE4|A5CVE4_MOUSE MCG1293 OS=Mus musculus GN=Stim2 PE=2 SV=1;tr|I1E4X8|I1E4X8_MOUSE Stromal interaction molecule 2 OS=Mus musculus GN=Stim2 PE=1 SV=1;tr|B7ZN44|B7ZN44_MOUSE Stim2	124440000	37096000	30141000	212220000	171400000	70085000	131610000	93572000	40780000	19390000	2647700	789270	641300	4515300	3646800	1491200	2800300	1990900	867670	175960000	158670000	240590000	256570000	186120000	156740000	162010000	172700000	131530000	12	11	11	21.7	19.7	19.7	90.386	0	49.633	911350000	40	10	7	7	10	10
617	B2RQF5;Q3UV20;P60755;F6UYI7	B2RQF5;Q3UV20;P60755	MAM domain-containing glycosylphosphatidylinositol anchor protein 2	Mdga2	tr|B2RQF5|B2RQF5_MOUSE MAM domain-containing glycosylphosphatidylinositol anchor protein 2 OS=Mus musculus GN=Mdga2 PE=2 SV=1;tr|Q3UV20|Q3UV20_MOUSE Putative uncharacterized protein OS=Mus musculus GN=Mdga2 PE=2 SV=1;sp|P60755|MDGA2_MOUSE MAM domain-contai	39004000	8953600	8285800	6442600	15345000	10168000	91914000	55870000	39587000	4920900	696490	159890	147960	115050	274010	181570	1641300	997670	706910	26775000	42985000	52471000	11399000	13113000	20642000	97268000	78468000	62203000	9	9	9	11.7	11.7	11.7	107.52	0	12.155	275570000	19	4	3	2	2	3
618	B2RQG2;Q80U54;Q4FZG1;Q8BLA7;A0PJJ1;Q8BU94;Q8VCJ7	B2RQG2;Q80U54		Phf3	tr|B2RQG2|B2RQG2_MOUSE PHD finger protein 3 OS=Mus musculus GN=Phf3 PE=1 SV=1;tr|Q80U54|Q80U54_MOUSE MKIAA0244 protein (Fragment) OS=Mus musculus GN=Phf3 PE=2 SV=1	20511000	15629000	3729100	81598000	119280000	46887000	5684800	5337000	1873200	2568600	175300	133580	31873	697420	1019500	400740	48588	45615	16010	53370000	35741000	0	64463000	128920000	106350000	14995000	16057000	26290000	13	13	13	8.2	8.2	8.2	225.54	0	14.748	300530000	24	7	6	1	8	11
619	B2RQQ5;Q8CFR9;A0PJ96;Q3TZM8;Q3TYV8;Q8CAI9;Q3UPV4;Q3UF78	B2RQQ5		Map1b	tr|B2RQQ5|B2RQQ5_MOUSE Microtubule-associated protein 1B OS=Mus musculus GN=Map1b PE=2 SV=1	8327200000	4091600000	3277000000	12651000000	10558000000	6625900000	7509400000	5394700000	3505600000	520510000	69977000	34384000	27537000	106310000	88726000	55680000	63104000	45334000	29459000	12063000000	12335000000	12761000000	15178000000	14312000000	14202000000	8566300000	8491000000	9569100000	90	87	1	49.7	48.8	0.5	270.3	0	323.31	61941000000	1135	82	79	71	82	82
620	B2RQQ7;Q7TT50	B2RQQ7;Q7TT50	Non-specific serine/threonine protein kinase;Serine/threonine-protein kinase MRCK beta	Cdc42bpb	tr|B2RQQ7|B2RQQ7_MOUSE CDC42 binding protein kinase beta OS=Mus musculus GN=Cdc42bpb PE=2 SV=1;sp|Q7TT50|MRCKB_MOUSE Serine/threonine-protein kinase MRCK beta OS=Mus musculus GN=Cdc42bpb PE=1 SV=2	610650000	372800000	343580000	1010800000	713430000	513420000	1640100000	1144600000	464450000	72487000	6496300	3966000	3655100	10753000	7589700	5461900	17448000	12176000	4940900	1189600000	1195200000	1611800000	1103100000	1028800000	933120000	1551200000	1433500000	1319800000	57	49	48	37.8	34.4	33.7	194.73	0	323.31	6813800000	231	45	35	29	46	40
621	B2RQQ8;P08122;D3YV27	B2RQQ8;P08122	Collagen alpha-2(IV) chain;Canstatin	Col4a2	tr|B2RQQ8|B2RQQ8_MOUSE Collagen, type IV, alpha 2 OS=Mus musculus GN=Col4a2 PE=2 SV=1;sp|P08122|CO4A2_MOUSE Collagen alpha-2(IV) chain OS=Mus musculus GN=Col4a2 PE=2 SV=4	347790000	201160000	137700000	374620000	482580000	195370000	658300000	384800000	270800000	32480000	3699900	2140000	1464900	3985300	5133900	2078400	7003200	4093600	2880900	777200000	820220000	671150000	427200000	560250000	532090000	617870000	706690000	745370000	13	13	12	13.3	13.3	12.8	167.32	0	111.76	3053100000	93	9	10	9	12	11
[truncated: 7,536 more rows]
[truncated: 31 more columns]
