# Supplementary material for: An efficient method for high-pH peptide fractionation based on C18 StageTips for in-depth proteome profiling
Source: Royal Society of Chemistry journal article supplement (doi:10.1039/c9ay01269a), 2019-01-01
Supplement: c9ay01269a10.xlsx [file c9ay01269a10.xlsx]

## Sheet: Supplementary Table S8
Supplementary Table S8. Gene Ontology (GO) Cellular component annotation of proteome of three sub-regions in mouse cerebellum. GO annotation was performed using the DAVID bioinformatics resource 6.8 beta (http://david.abcc.ncifcrf.gov) and PANTHER classification system (http://pantherdb.org)
		Number of proteins
	GO cellular component term	Expected	Observed	% Recovered
General	extracellular region	4459	1931	43.3057
	cell-cell junction	452	253	55.9735
	plasma membrane region	968	529	54.6488
	transmembrane transporter complex	287	143	49.8258
	whole membrane	1106	721	65.1899
	cytoplasmic part	7844	4474	57.0372
	cytosol	2968	1831	61.6914
	chromosome	1014	462	45.5621
	intracellular organelle part	6676	3744	56.0815
	nuclear part	3676	1995	54.2709
	nucleus	6486	3144	48.4736
Neuronal Specific	neuron part	1620	1063	65.6173
	synapse part	750	540	72
	synaptic membrane	317	218	68.7697
	presynapse	371	265	71.4286
	postsynapse	478	350	73.2218
	dendrite	622	432	69.4534
	axon	519	366	70.5202
