# Supplementary material for: An efficient method for high-pH peptide fractionation based on C18 StageTips for in-depth proteome profiling
Source: Royal Society of Chemistry journal article supplement (doi:10.1039/c9ay01269a), 2019-01-01
Supplement: c9ay01269a11.xlsx [file c9ay01269a11.xlsx]

## Sheet: Supplementary Table S9
Supplementary Table S9. Differentially expressed proteins (DEPs) list of three sub-regions in mouse cerebellum. All significantly expressed proteins with adjusted p-value <0.05 (ANOVA, Benjamini-Hochberg FDR <0.05) are listed. In each samples, the log2-transformed LFQ intensity that obtained from MaxLFQ algorithm in Maxquant program is shown.
No.	Protein IDs	Majority protein IDs	Protein names	Gene names	Log2 (LFQ intensity FL1)	Log2 (LFQ intensity FL2)	Log2 (LFQ intensity FL3)	Log2 (LFQ intensity GL1)	Log2 (LFQ intensity GL2)	Log2 (LFQ intensity GL3)	Log2 (LFQ intensity ML1)	Log2 (LFQ intensity ML2)	Log2 (LFQ intensity ML3)	Peptides	Razor + unique peptides	Unique peptides	Sequence coverage [%]	Unique + razor sequence coverage [%]	Unique sequence coverage [%]	Mol. weight [kDa]	Q-value	Score	Intensity	MS/MS count	-Log(ANOVA p value)	ANOVA q-value
1	A0A023T672;Q9CWZ3-2;Q9CWZ3;Q9CT44	A0A023T672;Q9CWZ3-2;Q9CWZ3	RNA-binding protein 8A	RBM8;Rbm8a	28.6249	28.6977	28.5542	29.0484	28.8329	28.4972	27.6982	26.7393	27.434	8	8	8	62.6	62.6	62.6	19.889	0	57.872	2307500000	68	2.57332	0.00930531
2	A0A024QYR9;O08586;Q8BSR7;Q3UUT8;Q8R5G7-3;Q8R5G7-2;Q8R5G7	A0A024QYR9;O08586;Q8BSR7	Phosphatidylinositol 3,4,5-trisphosphate 3-phosphatase and dual-specificity protein phosphatase PTEN	Pten	27.62	27.0082	27.5104	26.731	26.5815	26.5134	28.0707	27.8219	27.2819	12	12	3	21.2	21.2	3.8	64.566	0	37.689	1109100000	43	1.95412	0.0274648
3	Q78ZJ8;A0A068BFR3;P46638;G3UY29;E9Q3P9;F8WGS1;G3UZD3;Q0PD45;P62492;Q3UZ37;G3UZL4;Q9QWU0;E9Q6B3;E9PZB2;F6R2Z5;P97345;D3YYB3;Q0PD30;Q9WTL2	Q78ZJ8;A0A068BFR3;P46638;G3UY29;E9Q3P9;F8WGS1;G3UZD3;Q0PD45;P62492;Q3UZ37;G3UZL4	Ras-related protein Rab-11B;Ras-related protein Rab-11A	Rab11b;Rab11a	32.4219	32.7795	32.8121	32.3279	31.9949	32.2206	32.5755	32.5933	32.7947	14	14	14	62.8	62.8	62.8	24.489	0	323.31	32912000000	438	1.65592	0.0463495
4	A0A068BFS4;O35730;O35730-3;O35730-2	A0A068BFS4;O35730;O35730-3;O35730-2	E3 ubiquitin-protein ligase RING1	Ring1	25.5724	25.2093	26.2664	26.1905	26.9371	27.054	25.1481	22.91	24.3129	6	4	4	23.9	16.5	16.5	42.612	0	14.713	329800000	13	1.76711	0.0380902
5	Q14C53;A0A068BIT0;Q31125	Q14C53;A0A068BIT0;Q31125	Zinc transporter SLC39A7	Slc39a7	25.9342	26.4907	26.2573	27.107	27.2037	27.1365	26.6276	25.9774	26.544	2	2	2	7.1	7.1	7.1	50.686	0	26.685	790000000	11	1.97418	0.0265455
6	A0A068EW80;Q60953-2;Q60953;F7BTZ2;D3Z3A6;D3YXR5;Q8BSJ6;D3Z2V0;O89066	A0A068EW80;Q60953-2;Q60953;F7BTZ2;D3Z3A6;D3YXR5	Protein PML	Pml	26.5196	24.8853	25.0643	27.4069	27.695	27.038	26.0799	24.4546	24.6179	14	14	14	21.2	21.2	21.2	98.241	0	43.485	543650000	33	1.69852	0.0429408
7	D3Z4T6;A0A4W9;Q80Z24;H3BKU7	D3Z4T6;A0A4W9;Q80Z24	Neuronal growth regulator 1	Negr1	31.4639	31.5203	31.7549	31.7504	31.6453	31.6352	32.3162	32.2315	32.3434	14	14	14	49.8	49.8	49.8	36.208	0	215.97	16822000000	251	3.57287	0.00172612
8	A0AUN0;Q4G0C0;G3X928;Q6NZC7;Q3UY74	A0AUN0;Q4G0C0;G3X928;Q6NZC7	SEC23-interacting protein	Sec23ip	28.6164	28.653	28.8535	28.8593	28.7857	28.9126	28.5165	28.3275	28.3081	23	23	23	38.1	38.1	38.1	95.116	0	81.481	2457600000	102	2.36372	0.0133761
9	A0AUV1;A3KPD0;B2RVF0;A2AB79;Q8CGP6;Q8CGP7;Q8CGP5;Q8BFU2;P22752;Q8R1M2;Q61668	A0AUV1;A3KPD0;B2RVF0;A2AB79;Q8CGP6;Q8CGP7;Q8CGP5;Q8BFU2;P22752;Q8R1M2	Histone H2A;Histone H2A type 1-H;Histone H2A type 1-K;Histone H2A type 1-F;Histone H2A type 3;Histone H2A type 1;Histone H2A.J	Hist1h2ah;Hist1h2ad;Hist3h2a;Hist1h2ak;Hist1h2af;Hist1h2ab;H2afj	36.9758	37.0732	37.0292	38.4792	37.4934	37.8517	35.8227	35.813	35.7867	9	9	1	69.3	69.3	7.9	13.819	0	311.51	910270000000	2020	3.49837	0.00194007
10	A0JLQ7;Q8BFV2;Q8BNM3;E9Q1H5;E9Q5V9	A0JLQ7;Q8BFV2;Q8BNM3	PCI domain-containing protein 2	Pcid2	27.6212	27.7969	27.7605	28.0827	27.9475	27.7798	26.8508	27.3939	27.3205	15	15	15	48.5	48.5	48.5	47.018	0	47.181	1200000000	42	2.03605	0.0237844
11	A0JLV3;B2RTK3;Q8CGP2;Q64525;Q64475;P10854;Q8CGP2-2;A0JNS9;Q8VEE3;G3X9D5	A0JLV3;B2RTK3;Q8CGP2;Q64525;Q64475;P10854;Q8CGP2-2;A0JNS9	Histone H2B;Histone H2B type 1-P;Histone H2B type 2-B;Histone H2B type 1-B;Histone H2B type 1-M	Hist1h2bj;Hist1h2bm;Hist1h2bp;Hist2h2bb;Hist1h2bb;Hist1h2ba	36.7211	36.8088	37.0744	37.1185	37.1867	37.5755	35.5297	35.6388	35.3028	13	13	1	72.4	72.4	7.3	13.579	0	323.31	880800000000	3876	4.05633	0.000788713
12	A0MNP4;Q9ERF3;Q8BVQ0;D6RDC7;D6RJ72;Q8BKW0	A0MNP4;Q9ERF3;Q8BVQ0;D6RDC7	WD repeat-containing protein 61;WD repeat-containing protein 61, N-terminally processed	Wdr61	28.603	27.9229	27.9725	28.7814	28.8819	28.7876	27.5464	27.9107	28.0211	13	13	13	62.6	62.6	62.6	33.772	0	67.307	1755400000	78	2.00108	0.0253388
13	A0PJ63;G5E8V8;Q9JJT9;F6RPD4	A0PJ63;G5E8V8;Q9JJT9;F6RPD4	Phosphorylated adapter RNA export protein	Phax	24.7272	25.1837	25.9809	25.7665	25.7684	26.144	21.917	24.5165	22.7416	4	4	4	17.4	17.4	17.4	34.964	0.00015319	4.8968	165200000	9	1.81468	0.0350572
14	A0PJL3;Q6PDS3;Q6PDS3-3;Q6PDS3-2;Q6PDS3-4	A0PJL3;Q6PDS3;Q6PDS3-3;Q6PDS3-2	Sterile alpha and TIR motif-containing protein 1	Sarm1	29.1253	29.222	29.1674	28.8788	28.7941	28.8188	29.2619	29.2828	29.4708	29	29	29	51.1	51.1	51.1	77.295	0	167.39	3294200000	173	3.2904	0.00272912
15	A1ILG8;Q8BX70-3;Q8BX70;Q8BX70-2;A1ILH0;A1ILG9;A1ILH1;A1ILH3;A1ILH2;A1ILH4	A1ILG8;Q8BX70-3;Q8BX70;Q8BX70-2	Vacuolar protein sorting-associated protein 13C	Vps13c	31.1279	31.077	31.089	30.8065	30.5792	30.4792	31.6308	31.5356	31.4758	119	119	118	41.9	41.9	41.9	420.08	0	323.31	13068000000	547	3.86343	0.00107364
16	A1L0U3;B9EI85;P84228;F8WI35;E0CYR7;E0CYN1	A1L0U3;B9EI85;P84228;F8WI35	Histone H3;Histone H3.2	Hist1h3e;Hist2h3b;Hist1h3b;H3f3a	24.0369	23.5375	24.9229	31.9898	33.8887	34.9675	23.7164	23.8924	21.5689	17	1	1	66.9	24.1	24.1	15.029	0	147.91	64236000000	294	4.12697	0.000710256
17	A1L0U6;A2AS98;P28660;P28660-2	A1L0U6;A2AS98;P28660;P28660-2	Nck-associated protein 1	Nckap1	32.9816	32.8251	32.4942	32.5604	32.5806	32.4282	33.6149	33.4787	33.1885	64	64	62	58.8	58.8	57.4	129.38	0	323.31	49261000000	1021	2.46856	0.011217
18	A1L0V4;P68433	A1L0V4;P68433	Histone H3;Histone H3.1	Hist1h3i;Hist1h3a	22.6886	23.9329	23.3498	32.045	32.6034	32.3371	22.1809	26.1469	23.3442	17	1	1	65.9	23.7	23.7	15.273	0	98.699	19941000000	200	3.72976	0.00133875
19	A1L151;Q99JG2	A1L151;Q99JG2	Prosaposin receptor GPR37L1	Gpr37l1	32.2294	32.3568	32.1321	30.3547	30.6546	30.5888	33.3784	33.1911	32.9022	10	10	10	35.6	35.6	35.6	38.32	0	316.17	28550000000	308	5.26694	0.000130637
20	A1L2Z3;Q8C7X2;Z4YJW0;Q8C7X2-3	A1L2Z3;Q8C7X2;Z4YJW0	ER membrane protein complex subunit 1	Emc1	30.9586	31.0664	31.073	31.2013	31.4049	31.3671	31.1143	31.1072	31.0126	37	37	1	46	46	1.3	111.63	0	323.31	11719000000	351	2.06417	0.0225872
21	A1L338;Q3UGX8;Q3UHC1;Q91ZZ2;E0CXV1;Q8C5V7;F6ZDE5	A1L338;Q3UGX8;Q3UHC1;Q91ZZ2;E0CXV1		Rapgef1	26.7028	27.0701	27.2911	26.6087	26.6512	26.5093	27.2872	27.4467	27.3715	14	14	14	14.9	14.9	14.9	132.02	0	37.79	662690000	52	2.23683	0.0166496
22	A1L361;Q9WUN2;Q3THP3	A1L361;Q9WUN2;Q3THP3	Serine/threonine-protein kinase TBK1	Tbk1	26.6062	26.6274	26.2839	26.0743	26.7601	26.2416	27.248	27.2449	27.2894	14	14	14	24.8	24.8	24.8	83.424	0	36.097	726950000	51	2.15904	0.0191751
23	A1L3B6;Q9D7Z3;Q9D7Z3-2	A1L3B6;Q9D7Z3;Q9D7Z3-2	Nucleolar protein 7	Nol7	25.0354	24.8316	24.8656	26.1207	25.7899	26.336	23.5871	23.3168	23.3249	5	5	5	21.7	21.7	21.7	28.97	0	11.173	240140000	13	5.08124	0.000165525
24	B1AVN9;Q3UQ19;A1L3S9;A3KGD2;B1AVN8;B1AVP0;Q91VK6;Q3UTF8	B1AVN9;Q3UQ19;A1L3S9;A3KGD2;B1AVN8;B1AVP0;Q91VK6;Q3UTF8	Phosphatase and actin regulator	Phactr2	26.3936	26.6633	26.4331	23.9247	24.9842	23.3306	26.9261	27.0827	27.2063	7	7	7	17.3	17.3	17.3	61.763	0	69.122	583810000	33	3.14558	0.00348337
25	E9PXY1;A2A432;A2A432-2;J3QJX0;Q3TP81;REV__Q8BIY3;REV__E9QNR7	E9PXY1;A2A432;A2A432-2;J3QJX0	Cullin-4B	Cul4b	29.2725	29.2522	29.4886	28.5692	28.8705	28.4546	28.5681	28.7417	28.6316	34	20	20	35.6	22.9	22.9	102.41	0	68.832	2404400000	115	2.68853	0.00760673
26	A2A484;Q8CHB3;Q80Y82;A2A483;E9Q8D1;A2A482;A2A485;Q3UH28;Q3V1I9;Q3U1M7;A2A481;A2A480;Q6P4S7;Q80XT8;Q3V437;A2A486	A2A484;Q8CHB3;Q80Y82;A2A483;E9Q8D1;A2A482;A2A485;Q3UH28;Q3V1I9;Q3U1M7;A2A481;A2A480;Q6P4S7;Q80XT8		Zmynd8	27.2022	26.8105	27.1843	28.1966	28.6466	28.5075	25.3647	25.1667	24.5928	22	22	22	25.2	25.2	25.2	136.94	0	59.047	1071800000	53	4.61588	0.000326856
27	Q3UQQ4;A2A4P0;A2A4N9;Q5DTN5;Q3TUC8;Q8R214;Q3U580	Q3UQQ4;A2A4P0;A2A4N9;Q5DTN5;Q3TUC8	ATP-dependent RNA helicase DHX8	Dhx8	27.4946	27.6464	26.7129	28.3151	28.2141	28.3241	25.4689	25.6612	25.1341	24	23	22	26.4	25.7	25.1	142.55	0	64.23	1090700000	69	3.93155	0.000967604
28	A2A547;Q5I0T8;P84099	A2A547;Q5I0T8;P84099	Ribosomal protein L19;60S ribosomal protein L19	Rpl19	29.3419	29.7158	29.7812	29.9618	30.0981	30.0883	28.9754	28.5497	27.9464	7	7	7	26.8	26.8	26.8	23.247	0	90.909	4924100000	96	2.51512	0.0103159
29	A2A5R2;Q3U5C3;Q3U2F2;F6YCJ0	A2A5R2;Q3U5C3	Brefeldin A-inhibited guanine nucleotide-exchange protein 2	Arfgef2	30.1556	30.54	30.5404	30.1262	29.9809	29.9244	30.7324	30.5571	30.7351	68	68	48	46.2	46.2	34.9	202.24	0	323.31	7585400000	338	2.28128	0.0153531
30	A2A5Y6;P10637-6;Q8C5K4;Q76M61;B1AQW6;B1AQW5	A2A5Y6;P10637-6	Microtubule-associated protein;Microtubule-associated protein tau	Mapt	33.2682	33.1197	33.2786	32.9647	33.2124	33.1661	33.756	33.5692	33.5652	32	32	1	54.5	54.5	1.9	78.085	0	323.31	55261000000	689	2.53149	0.0100273
31	E9Q6A7;A2A655;A2A654;E5D6T0;Q8K092;Q3UPA6;Q6P9L3;Q8CFX5;Q8C473;Q8VDN7;Q3TMJ3;A2A653	E9Q6A7;A2A655;A2A654;E5D6T0		Bptf	26.522	26.7195	25.5877	27.6079	27.7767	27.0639	25.5477	25.5277	25.2342	20	20	20	9.3	9.3	9.3	321.59	0	33.058	588350000	38	2.52265	0.0101965
32	A2A6A1;A0PJ58	A2A6A1;A0PJ58	G patch domain-containing protein 8	Gpatch8	24.7801	24.7652	25.5438	25.6895	26.1613	25.508	23.6359	24.0253	24.6605	5	5	5	5	5	5	164.99	0	5.9671	219570000	11	2.00541	0.025185
33	A2A6S2;Q01098;Q61984	A2A6S2;Q01098;Q61984	Glutamate receptor ionotropic, NMDA 2C	Grin2c;NMDA2C	29.5101	29.671	29.4937	30.5038	30.8408	30.7638	27.6353	27.5164	26.7674	44	44	40	43	43	41.6	135.42	0	323.31	4910200000	216	4.63839	0.000315551
34	A2A6U3;Q80UG5-3;Q80UG5;Q3TDR9;Q80UG5-2;A2A6U5;A8Y5D3	A2A6U3;Q80UG5-3;Q80UG5;Q3TDR9;Q80UG5-2;A2A6U5	Septin-9	2009-09-01	27.4719	27.5238	27.2734	28.3896	28.2252	27.6649	27.0184	27.1814	26.6462	12	12	12	24.1	24.1	24.1	63.772	0	25.094	1255900000	39	2.14427	0.0197051
35	A2A791;F6VYE2;A2A791-2	A2A791;F6VYE2;A2A791-2	Zinc finger MYM-type protein 4	Zmym4	25.6707	25.2567	25.1383	25.3971	25.3609	25.9055	24.1819	23.6672	23.8702	12	12	12	10.6	10.6	10.6	172.44	0	9.8576	201500000	17	3.14703	0.00347694
36	A2A7B5;B9EKQ3;Q80VF3	A2A7B5;B9EKQ3;Q80VF3		Prdm2	24.9223	25.2568	25.0175	25.3935	26.4719	26.5905	24.442	24.4182	24.3333	7	7	7	5.1	5.1	5.1	187.2	0	13.265	254530000	17	2.34	0.0139167
37	A2A7Z4;Q78IG7;Q9CQH7	A2A7Z4;Q78IG7;Q9CQH7	Transcription factor BTF3;Transcription factor BTF3 homolog 4	Btf3l4	28.3047	27.9403	27.4765	27.9201	28.4641	28.2647	27.347	27.398	27.1402	6	6	6	49.4	49.4	49.4	17.27	0	60.018	1499900000	51	1.62209	0.0491425
38	A2A841;P48193;P48193-2;A2A839;A2A838;A2AD32;A0A068WAZ7;A2A842;A0A068WAQ5;B6ZHC8;F7BUB8;F6S4K9;Q3V048;B6ZHC2;Q3U0G7;F7CR30	A2A841;P48193;P48193-2;A2A839;A2A838;A2AD32;A0A068WAZ7;A2A842;A0A068WAQ5;B6ZHC8	Protein 4.1	Epb4.1;Epb41	31.071	30.9016	31.1363	31.2499	31.6032	31.4827	30.4858	30.3819	30.7424	42	37	15	50.7	45.8	21.5	97.239	0	323.31	12964000000	284	2.80888	0.00612702
39	A2A891;A2A891-2;A2A891-5;Z4YMK8;Q8CCN7	A2A891;A2A891-2;A2A891-5	Calmodulin-binding transcription activator 1	Camta1	25.1402	24.9089	25.4143	26.4008	27.491	26.6417	22.6925	23.3041	22.2752	14	14	2	10.3	10.3	1.3	184.32	0	24.864	377750000	25	3.91468	0.000989685
40	A2A8F6;Q9D6I9	A2A8F6;Q9D6I9	Leucine rich adaptor protein 1	Lurap1	25.3439	25.6858	25.5782	26.6147	26.2861	26.3337	26.2107	26.0909	25.9336	5	5	5	37.2	37.2	37.2	25.83	0	24.438	267430000	21	2.74147	0.00693431
41	A2A8U2-2;A2A8U2-3;A2A8U2;Q3TXY3;Q8C397;Q8C9U2	A2A8U2-2;A2A8U2-3;A2A8U2;Q3TXY3;Q8C397;Q8C9U2	Transmembrane protein 201	Tmem201	29.8508	30.2078	30.1902	30.915	31.0553	31.3411	28.8152	28.76	28.6005	11	11	11	34.9	34.9	34.9	43.548	0	98.534	5463400000	124	4.92079	0.000207276
42	E9QKA4;A2A8V9;E9PUK6;Q52KI8-2;Q52KI8;A2A8V8;A2A983;F7BWM1;F6T4M4;F6UK16	E9QKA4;A2A8V9;E9PUK6;Q52KI8-2;Q52KI8;A2A8V8	Serine/arginine repetitive matrix protein 1	Srrm1	27.7503	28.1079	27.74	29.0089	28.6349	29.0929	25.8879	25.9638	26.015	10	10	10	12.9	12.9	12.9	101.16	0	31.078	2122200000	55	5.41391	0.000103437
43	F6UHR6;E9PXZ2;A2A8Z1;E9Q6C1;Q5FWX7;Z4YJX3;A2A8Z1-2;Q8VDM5;Q8R0G3;Q99LZ2;F8VQE8	F6UHR6;E9PXZ2;A2A8Z1;E9Q6C1;Q5FWX7;Z4YJX3;A2A8Z1-2;Q8VDM5;Q8R0G3	Oxysterol-binding protein;Oxysterol-binding protein-related protein 9	Osbpl9	26.946	27.0267	27.2596	26.5419	26.6563	27.1302	27.4912	27.4422	27.5293	14	14	14	27.5	27.5	27.5	81.09	0	20.473	864110000	42	1.82037	0.0347587
44	A8Y5H7;Q99J07;Q9DBQ0;A2A9B9;Q6A071;Q8BXE6	A8Y5H7;Q99J07;Q9DBQ0;A2A9B9;Q6A071		Sec14l1	25.7782	25.586	25.3855	25.612	24.301	24.538	26.6578	26.9588	26.567	17	17	17	31.3	31.3	31.3	81.215	0	39.128	432890000	38	2.30786	0.0146783
45	A2A9Q0	A2A9Q0	Fibronectin type-III domain-containing transmembrane protein C1orf233 homolog		25.3014	24.8461	24.0622	26.7493	26.1749	25.9127	24.7638	25.1418	24.1781	6	6	6	29.1	29.1	29.1	24.416	0	17.211	346140000	21	1.81023	0.0353193
46	Q8R320;A2A9Q2;Q8BHG1;A6PWC3;Q8CIJ0;Q8R1H1;Q9Z153;Q3V3G9	Q8R320;A2A9Q2;Q8BHG1;A6PWC3;Q8CIJ0;Q8R1H1	Nardilysin	Nrd1	28.6516	28.5862	28.1905	27.9179	28.0337	27.8881	28.6624	28.4762	28.345	24	24	24	23.7	23.7	23.7	132.88	0	59.028	1766400000	92	1.83953	0.0336005
47	A2A9W7;Q8BMI3;S4R2D2;A2A9W5;Q3UE19;Q3TVV9;Q6P5E6	A2A9W7;Q8BMI3;S4R2D2	ADP-ribosylation factor-binding protein GGA3	Gga3	28.1412	28.2024	28.0654	28.83	28.4461	28.634	28.4436	28.4121	28.5955	15	15	14	38.3	38.3	37.2	70.192	0	95.919	1882800000	58	2.05803	0.0228724
48	A2AAE1;A2AAE1-2;A2AAE1-6;A2AAE1-3;A2AAE1-4;F6YAT5;A2AB97;F6RPM4;Q8CDG7;A2AAE1-5;F6YB09;D6RI50	A2AAE1;A2AAE1-2;A2AAE1-6;A2AAE1-3;A2AAE1-4	Uncharacterized protein KIAA1109	Kiaa1109	28.6929	29.1114	28.5906	28.9926	28.6133	28.7327	29.4615	29.2183	29.5239	69	69	69	19.1	19.1	19.1	555.36	0	113.61	2771100000	148	1.69891	0.0429305
49	A2ABV5;A2BDP0;A2BDN7;A2ABV5-3;A2ABV5-2	A2ABV5;A2BDP0	Mediator of RNA polymerase II transcription subunit 14	Med14	24.6437	25.0667	24.346	25.8347	25.7689	26.5385	23.4093	22.9757	23.2368	8	8	8	9.2	9.2	9.2	160.96	0	13.768	163130000	20	3.74957	0.001299
50	Q61833;A2ACG7;Q3U505;Q9DBG6	Q61833;A2ACG7;Q3U505;Q9DBG6	Dolichyl-diphosphooligosaccharide--protein glycosyltransferase subunit 2	Rpn2	30.8061	31.0267	31.2392	31.4108	31.4888	31.6333	30.9567	31.0059	30.9697	22	22	22	43	43	43	66.301	0	323.31	16065000000	313	2.18394	0.0182764
51	A2ACL9;Q62443;Q3UST4	A2ACL9;Q62443;Q3UST4	Neuronal pentraxin-1	Nptx1	30.3944	30.0603	30.377	29.4543	29.5413	29.3888	30.9833	30.956	31.0739	16	16	16	35.6	35.6	35.6	47.117	0	323.31	8138200000	218	4.82872	0.000233433
52	A4FUW1;A2ACM0;Q8K4Q0;Q8K4Q0-2;E9PXZ5;Q8K4Q0-3;Q6ZPU3;F7BQS0;Q8K4Q0-5;F7CN67;Q8K4Q0-4;A7MAY7;F6U5L3;F7B6I3	A4FUW1;A2ACM0;Q8K4Q0;Q8K4Q0-2	Regulatory-associated protein of mTOR	Rptor	29.2684	29.345	29.4557	28.7968	28.9142	29.0807	29.6416	29.6078	29.3654	34	34	34	35.7	35.7	35.7	149.24	0	137.41	3551500000	191	2.46315	0.0113175
53	A2AD03;Q9QXG2;Q3UR39;Q8CBI2;Q9QZD5	A2AD03;Q9QXG2;Q3UR39;Q8CBI2	Rab proteins geranylgeranyltransferase component A 1	Chm	27.4157	27.8718	27.7351	27.0418	27.217	27.3589	28.2164	28.0992	28.4536	10	10	10	18	18	18	73.663	0	44.275	1520100000	47	2.76929	0.00659261
54	A2ADR8;Q8R3G1	A2ADR8;Q8R3G1	Nuclear inhibitor of protein phosphatase 1	Ppp1r8	28.0988	27.6655	28.6953	28.2601	28.5328	28.467	26.2805	26.2604	26.5288	12	12	12	50.6	50.6	50.6	38.399	0	56.038	1323500000	44	3.36088	0.0024541
55	A2AE27;Q9DBT5	A2AE27;Q9DBT5	AMP deaminase 2	Ampd2	30.085	29.7618	29.9784	29.755	29.9289	29.3334	30.5736	30.3263	30.2281	33	33	33	39.7	39.7	39.7	94.695	0	190.69	6612900000	247	1.62382	0.0490243
56	A2AEG6;P35803	A2AEG6;P35803	Neuronal membrane glycoprotein M6-b	Gpm6b	32.7663	32.4967	32.5213	32.4806	31.4861	32.18	33.3417	33.1923	33.1098	13	13	0	39.9	39.9	0	36.196	0	224.66	45386000000	302	1.94381	0.0280293
57	A2AER7;Q91VJ5;A2AER8;A2AER9	A2AER7;Q91VJ5;A2AER8	Polyglutamine-binding protein 1	Pqbp1	27.0604	27.4972	26.4289	27.1369	26.2963	27.5863	24.0123	24.5593	24.4205	6	6	6	26.2	26.2	26.2	30.597	0	66.814	507690000	33	2.99148	0.00452593
58	A2AEX8;A2AEX6;P97447;A2AEY1;A2AEY2;A2AEX7;P97447-2;A2AEY0;A2AEX9;Q9DAH0;Q8CDC8;Q6P8P1;O70403	A2AEX8;A2AEX6;P97447;A2AEY1;A2AEY2;A2AEX7;P97447-2	Four and a half LIM domains protein 1	Fhl1	30.5953	30.7151	30.6697	29.2479	29.7122	29.5955	30.5705	30.5532	30.8344	15	15	15	53.7	53.7	53.7	33.563	0	104.45	7055300000	167	3.60511	0.00163815
59	A2AF47;A2AF67;A2AF65;Q8CCF4	A2AF47;A2AF67	Dedicator of cytokinesis protein 11	Dock11	27.1281	27.1745	27.3844	26.0673	26.2861	26.6027	28.1657	27.8792	27.7918	27	23	21	15.2	13.5	12.9	237.77	0	31.874	816050000	55	3.64584	0.00152533
60	A2AFF6;O35638;Q3TG33;Q8BSB5;Q3TYZ1;Q3UKR7;O70576;F6XLF4;Q3UQG8	A2AFF6;O35638	Cohesin subunit SA-2	Stag2	28.376	27.9329	27.0278	28.6184	27.7629	28.4803	24.6211	25.0518	23.8547	30	25	25	28.5	24.6	24.6	145.7	0	50.067	1224400000	85	3.34195	0.00252004
61	A2AFG8;Q6PGJ3;A2AFG7;P11627;Q9QYQ7;Q684Q2;F7A5H7;B7ZCD3;F6UIL7	A2AFG8;Q6PGJ3;A2AFG7;P11627;Q9QYQ7	Neural cell adhesion molecule L1	L1cam;L1	31.639	31.562	31.6475	30.7104	30.8637	30.7474	32.6362	32.7047	32.6705	42	42	42	40.8	40.8	40.8	140.43	0	323.31	20638000000	532	7.3303	1.61036e-05
62	A2AFI8;B9EI38;B1AV20;Q3UHF8;Q3UHE9;Q80XA6	A2AFI8;B9EI38;B1AV20;Q3UHF8;Q3UHE9;Q80XA6	RalBP1-associated Eps domain-containing protein 2	Reps2	27.4095	27.6599	27.5118	27.4007	27.207	27.1999	28.4403	28.6373	28.3154	13	12	12	29.5	28	28	70.483	0	51.92	971490000	41	4.05711	0.000789468
63	A2AFQ0;Q7TMY8;Q4JG03;Q7TMY8-3;Q7TMY8-4;Q7TMY8-2;Q8BKX3;F6XP90;Q8C0G8;F6UYC1;Q9CU76;Q3TL29	A2AFQ0;Q7TMY8;Q4JG03;Q7TMY8-3;Q7TMY8-4;Q7TMY8-2	E3 ubiquitin-protein ligase HUWE1	Huwe1	31.5079	31.4766	31.5887	31.0931	31.1823	31.2874	31.3608	31.3744	31.5018	106	106	80	32	32	24.4	482.69	0	323.31	13470000000	578	2.2631	0.0158674
64	A2AFQ9;E9PUU4;Q8BX17;B2RQ83;B7ZN04;Q6KAS0;Q3TR97;F7CKD6	A2AFQ9;E9PUU4;Q8BX17;B2RQ83;B7ZN04;Q6KAS0;Q3TR97	Gem-associated protein 5	Gemin5	26.731	26.6089	26.4416	27.0117	26.7479	26.9242	25.9736	25.897	25.7781	16	16	16	14.9	14.9	14.9	166.52	0	64.126	496390000	42	3.73415	0.00132967
65	B2RWZ9;A2AGI2;Q69ZI4;Q8BYM5;A2AGI3;A2AGI0;Q924X0	B2RWZ9;A2AGI2;Q69ZI4;Q8BYM5;A2AGI3;A2AGI0	Neuroligin-3	Nlgn3;mKIAA1480	29.7256	29.7132	29.7432	29.9896	30.419	29.9141	30.5408	30.4252	30.2645	18	16	15	32.7	31.2	29.7	91.189	0	165.45	5530300000	161	2.03004	0.0240589
66	A2AGR0;Q80U28-3;Q80U28-15;Q80U28;E9QN47;Q80U28-14;A2AGQ6;A2AGR1;A2AGQ4;A2AGQ3;A2AGQ8;Q80U28-2;A2AGQ7;A2AGQ5;A2AGQ2;A2AGQ9;Q80U28-8;Q80U28-4;Q80U28-11;Q80U28-7;Q80U28-6;Q80U28-5;Q80U28-9;Q80U28-10;A6PWP8;Q80U28-13;Q80U28-12;Q99LH6;A6PWP7	A2AGR0;Q80U28-3;Q80U28-15;Q80U28;E9QN47;Q80U28-14;A2AGQ6;A2AGR1;A2AGQ4;A2AGQ3;A2AGQ8;Q80U28-2;A2AGQ7;A2AGQ5;A2AGQ2;A2AGQ9;Q80U28-8;Q80U28-4;Q80U28-11;Q80U28-7;Q80U28-6;Q80U28-5;Q80U28-9;Q80U28-10;A6PWP8;Q80U28-13;Q80U28-12	MAP kinase-activating death domain protein	Madd	31.1585	31.0868	31.043	30.682	30.6904	30.6679	31.7705	31.7327	31.5557	57	57	57	42.9	42.9	42.9	175.1	0	323.31	14410000000	462	5.01522	0.000177543
67	Q8BQW4;A2AH25;Q5FWK3;Q8C5A0;Q91Z04	Q8BQW4;A2AH25;Q5FWK3;Q8C5A0	Rho GTPase-activating protein 1	Arhgap1	30.3797	30.3157	30.2562	29.919	30.2435	30.2449	30.6913	30.5881	30.4975	23	23	23	62.8	62.8	62.8	54.441	0	302.35	6395000000	167	1.89108	0.0307005
68	Q543F1;A2AH85;Q6A0E3;O08810;G3UZ34;Q3U5Q3;Q3TMY8;Q7TMX4;G3UXK8;G3UZ25	Q543F1;A2AH85;Q6A0E3;O08810;G3UZ34;Q3U5Q3;Q3TMY8;Q7TMX4	116 kDa U5 small nuclear ribonucleoprotein component	Eftud2	31.5067	31.6142	31.5969	32.4854	32.2362	32.3813	30.3422	30.3316	30.3153	54	53	53	69.7	68.7	68.7	109.36	0	323.31	19195000000	574	6.66017	2.46817e-05
69	A2AHC3;A2AHC4;A2AHC3-2;F6Q2D3;F6QF29;F6W3X2;V9GXT0;V9GXD7	A2AHC3;A2AHC4;A2AHC3-2	Calmodulin-regulated spectrin-associated protein 1	Camsap1	28.2906	27.9934	27.9713	27.4144	27.5358	27.1494	28.371	28.2557	28.1325	25	25	25	22.1	22.1	22.1	175.89	0	53.682	1295600000	73	2.83634	0.00584315
70	A2AHJ7;A2AHK0;Q80UP3;Q91YS0;Q05DE1;D6RHK9	A2AHJ7;A2AHK0;Q80UP3;Q91YS0	Diacylglycerol kinase;Diacylglycerol kinase zeta	Dgkz	30.9544	31.1684	31.299	29.7252	30.0161	29.7223	31.5817	31.5638	31.7276	28	28	25	34.6	34.6	31.8	105.9	0	305.52	13333000000	342	4.80957	0.00024279
71	A2AI14;A2AI21;A2AI20;A2AI17;P35438;A2AI19;Q3TZ31	A2AI14;A2AI21;A2AI20;A2AI17;P35438;A2AI19;Q3TZ31	Glutamate receptor ionotropic, NMDA 1	Grin1	29.9265	29.8413	29.7614	30.8987	30.8758	30.7826	29.2282	29.1444	28.965	30	30	1	35.1	35.1	1.2	106.12	0	138.22	6695000000	228	5.72262	7.20813e-05
72	A2AI89;A2AI88;A2AI87;P18826-2;P18826;Q8CBA7;A2AI91;Q3UV91;Q8BSV5;Q3TQJ0	A2AI89;A2AI88;A2AI87;P18826-2;P18826;Q8CBA7;A2AI91;Q3UV91;Q8BSV5	Phosphorylase b kinase regulatory subunit alpha, skeletal muscle isoform	Phka1	29.3744	29.338	29.7446	29.1463	29.0265	29.2769	30.3649	30.2113	30.2917	39	39	38	43.4	43.4	42.9	135.6	0	131.25	4867800000	184	3.54904	0.00179167
73	A2AIL4	A2AIL4	NADH dehydrogenase (ubiquinone) complex I, assembly factor 6	Ndufaf6	26.6439	26.7116	26.6418	27.9366	27.6107	27.685	26.9905	27.3328	26.8121	11	11	11	41.7	41.7	41.7	38.362	0	21.623	821230000	36	2.98797	0.00455337
74	E9PZY8;A2AIV2;A2AIV2-2;Q8CFK9	E9PZY8;A2AIV2;A2AIV2-2;Q8CFK9	Protein virilizer homolog	1110037F02Rik;Kiaa1429	26.5863	26.4173	25.7317	26.4709	27.9452	26.8358	24.9817	24.9644	24.4055	15	15	14	10.4	10.4	10	207.17	0	29.586	473920000	32	2.22276	0.0170409
75	A2AJ26;P41234;Q6ZPZ4;Q3TZM0;Q3TMR1	A2AJ26;P41234;Q6ZPZ4	ATP-binding cassette sub-family A member 2	Abca2	28.7839	28.8609	28.8665	29.6183	29.8498	29.5279	27.5231	27.5901	27.2791	42	42	40	23.3	23.3	22.2	270.52	0	148.8	2875600000	158	5.47138	9.74025e-05
76	A2AJA9;A2AJA9-2	A2AJA9;A2AJA9-2	Uncharacterized protein C9orf172 homolog	Gm996	30.7003	30.6651	30.7627	30.863	31.0919	31.0714	30.2019	30.2325	30.2133	43	43	43	58.7	58.7	58.7	107.18	0	290.98	9550300000	332	4.27805	0.000552138
77	A2AJH3;Q3THR4;O70311;Q8CFK1	A2AJH3;Q3THR4;O70311;Q8CFK1	Glycylpeptide N-tetradecanoyltransferase;Glycylpeptide N-tetradecanoyltransferase 2	Nmt2	27.3668	27.5113	27.875	26.5719	26.3625	26.0643	27.4704	27.4101	27.5171	17	12	12	42.8	34.1	34.1	56.984	0	40.34	855830000	38	3.1809	0.00329968
78	A2AJK6-3;A2AJK6	A2AJK6-3;A2AJK6	Chromodomain-helicase-DNA-binding protein 7	Chd7	23.9471	23.7756	23.6598	24.8291	24.8688	24.7776	24.0018	23.7494	23.8028	11	7	5	4.2	2.9	2.3	331.19	0	18.439	77452000	8	4.23339	0.000593886
79	A2AJW4	A2AJW4	Protein phosphatase 1 regulatory subunit	Ppp1r3d	25.3225	24.9994	25.0341	24.8874	24.5374	24.9486	25.6037	25.8765	26.4604	6	6	6	29.7	29.7	29.7	30.509	0	7.7704	230850000	18	2.13728	0.0199748
80	A2AJY2;O35206;A2AJY7;A2AJY5	A2AJY2;O35206;A2AJY7;A2AJY5	Collagen alpha-1(XV) chain;Restin	Col15a1	27.2314	27.061	27.2661	26.6498	26.7948	26.3727	27.1441	26.7693	26.9	11	11	11	10.4	10.4	10.4	138.29	0	45.321	660480000	51	1.70428	0.0425563
81	A2AKH7;Q8JZX5;Q9CSK4;Q9D1G5;Q9CTX7;B0R031	A2AKH7;Q8JZX5;Q9CSK4;Q9D1G5;Q9CTX7	Leucine-rich repeat-containing protein 57	Lrrc57	29.1447	29.3975	29.4549	29.6553	29.6164	29.9943	29.8298	29.7724	29.8665	11	11	10	59.2	59.2	56.4	24.132	0	85.508	4241100000	151	1.77893	0.0373473
82	Q6P6I7;A2AL12;Q5FB19;Q3UZG3;Q8BG05;Q5U3M2;Q58E39;A2AL13;V9GX38	Q6P6I7;A2AL12;Q5FB19;Q3UZG3;Q8BG05;Q5U3M2	Heterogeneous nuclear ribonucleoprotein A3	Hnrnpa3	34.0939	33.694	34.0827	34.4387	34.7034	34.5668	32.4784	32.5472	32.4276	30	30	5	64.8	64.8	10.1	34.376	0	323.31	118070000000	1303	5.05004	0.000171074
83	A2ALF0;A2ALF2;Q6NZB0;A2ALF3;F6TQL3;F7CXJ2;F6QIL6	A2ALF0;A2ALF2;Q6NZB0;A2ALF3;F6TQL3	DnaJ homolog subfamily C member 8	Dnajc8	27.5461	27.6522	28.1468	28.2403	28.5099	28.4263	25.992	25.69	22.3423	7	7	7	34.7	34.7	34.7	25.835	0	196.7	1528800000	30	1.7468	0.0393513
84	A2ALK6;Q3TMR3;Q9JMC8;B1AXV1	A2ALK6;Q3TMR3;Q9JMC8	Band 4.1-like protein 4B	Epb4.1l4b;Epb41l4b	26.683	26.659	26.5983	27.2861	27.3947	27.6043	26.179	26.3976	26.2386	12	12	11	20.1	20.1	19.2	99.782	0	25.389	628450000	45	4.27414	0.000555347
85	A2ALL9;Q8C048;Q0VF54;REV__Q91YR5-2;REV__Q91YR5-1;REV__Q3TRF3;REV__Q91YR5	A2ALL9;Q8C048;Q0VF54	Calcium-transporting ATPase	Atp2b3	34.6737	34.4083	34.3188	34.352	34.4298	34.464	35.0368	35.0173	34.9764	69	69	2	54.6	54.6	1.8	128.74	0	323.31	191010000000	2934	2.93394	0.00498782
86	A2ALR9;Q3V0C5;Q3V0C5-5;Q3V0C5-2;A2ALR8;Q3V0C5-4;Q3V0C5-3;B7ZNK5;A2ALS8;A2ALS9;F7ALR2;F6TH61;F6VSP0;A2BDP2;A2ALR5	A2ALR9;Q3V0C5;Q3V0C5-5;Q3V0C5-2;A2ALR8;Q3V0C5-4;Q3V0C5-3	Ubiquitin carboxyl-terminal hydrolase 48	Usp48	30.5502	30.5844	30.337	31.806	31.7668	31.8237	30.7413	30.6604	30.8334	7	7	7	9.8	9.8	9.8	118.77	0	12.282	18783000000	34	5.2414	0.000134577
87	A2ALV3;Q62420;Q8BXU5;F6ZL13;A2ALV1	A2ALV3;Q62420;Q8BXU5;F6ZL13;A2ALV1	Endophilin-A1	Sh3gl2	33.1407	33.0137	32.8753	32.7845	32.5931	32.727	33.0524	33.4391	33.2967	21	14	14	47.1	38.5	38.5	48.295	0	323.31	56939000000	930	1.99297	0.0256764
88	A2AMH5;A2AMH4;Q6X893;Q6X893-2;A2AMH3;A2AMH8	A2AMH5;A2AMH4;Q6X893;Q6X893-2;A2AMH3	Choline transporter-like protein 1	Slc44a1	30.3485	30.2474	30.4555	31.3977	31.4461	31.2442	30.0718	29.9702	29.8671	18	18	18	25.8	25.8	25.8	73.044	0	274.38	9919400000	286	5.06966	0.000167949
89	Z4YKC4;A2AMI2;Q80XI3-2;Q80XI3-4;Q80XI3;Q80XI3-3;Q6DI78;A2AMI7;Q3V075;A2AMI6;A2AMI4;Q8BQR8	Z4YKC4;A2AMI2;Q80XI3-2;Q80XI3-4;Q80XI3;Q80XI3-3;Q6DI78;A2AMI7	Eukaryotic translation initiation factor 4 gamma 3	Eif4g3	29.5126	29.3643	29.7126	29.4017	29.2983	28.9212	28.5643	28.7573	28.5489	34	29	29	26.4	23.3	23.3	173.55	0	76.163	3629100000	131	2.5094	0.0104311
90	A2AN08-3;A2AN08;A2AN08-5;A2AN08-2;F6SSP6;Z4YMA7;A2VCS3;A2AN08-4;Z4YLP1	A2AN08-3;A2AN08;A2AN08-5	E3 ubiquitin-protein ligase UBR4	Ubr4	31.3729	31.3819	31.5045	31.2673	31.2709	31.2639	31.6441	31.5636	31.5657	140	140	140	37.2	37.2	37.2	570.29	0	323.31	15463000000	735	3.17769	0.003314
91	Q6GQU3;Q70KX6;Q8BIT2;Q3UUV0;Q3TMV1;Q3TXU6;A2AN61;Q8VEH2;F7D5G9;F6S5B6;F6XWQ4	Q6GQU3;Q70KX6;Q8BIT2;Q3UUV0;Q3TMV1;Q3TXU6;A2AN61;Q8VEH2;F7D5G9;F6S5B6;F6XWQ4		Ciz1	24.2666	23.7894	23.9411	25.015	25.1811	24.4468	23.6762	23.6441	22.2605	3	3	3	7.3	7.3	7.3	59.618	0	6.0785	104810000	7	1.62549	0.0488826
92	Q80YU9;A2AN96;O88851	Q80YU9;A2AN96;O88851	Putative hydrolase RBBP9	Rbbp9	29.8862	29.6357	29.576	29.6641	29.5189	29.7159	30.4105	30.4052	30.2606	10	10	10	67.7	67.7	67.7	20.912	0	76.742	4493900000	113	3.21444	0.00310429
93	A2ANM0;Q9WTS4;A2ANL9;Q9WTS4-2	A2ANM0;Q9WTS4;A2ANL9	Teneurin-1;Ten-1 intracellular domain;Teneurin C-terminal-associated peptide	Tenm1	27.458	27.8265	28.1886	27.2216	27.5542	27.5926	28.5637	28.7925	28.883	24	24	22	11.6	11.6	10.7	305.79	0	82.734	1478500000	73	2.63477	0.00838092
94	J3QMC5;A2ANY6;Q3TPE2;Q6R5G2;Q497I1;Q8CAR9;Q5U481	J3QMC5;A2ANY6		Mdn1	25.1412	25.5713	24.9107	27.8198	27.3416	27.0324	24.1927	23.764	25.3713	24	24	24	6	6	6	629.58	0	35.713	446250000	35	2.76234	0.00667913
95	H3BIW6;F7C3A0;A2AP18-3;A2AP18-2;A2AP18-4;A2AP18;H3BK11;A2AP18-5;Q6PAS6;Q6ZQB0;F6UKG4;F7C512;A6PWW4;Q4KWH5-5	H3BIW6;F7C3A0;A2AP18-3;A2AP18-2;A2AP18-4;A2AP18;H3BK11;A2AP18-5	Phosphoinositide phospholipase C;1-phosphatidylinositol 4,5-bisphosphate phosphodiesterase eta-2	Plch2	28.0996	27.7869	27.9379	26.5084	25.987	26.1047	29.0618	28.7483	28.5098	28	28	26	32.2	32.2	30.6	125.78	0	96.099	1674400000	96	4.44911	0.000431
96	A2AP82;Q6NZA9;A2AP81	A2AP82;Q6NZA9	Transcription initiation factor TFIID subunit 9B	Taf9b	24.5374	24.3999	24.4836	24.9457	24.9732	25.1793	23.0679	23.5914	23.3839	4	4	1	13	13	3.8	32.051	0.00044676	4.242	122820000	14	4.21428	0.0006074
97	A2AP88;Q8BYK8;Q571G5	A2AP88;Q8BYK8	Zinc finger CCCH domain-containing protein 6	Zc3h6	27.0989	26.9268	26.6839	26.5077	25.0602	26.4615	23.9553	22.6448	23.8533	3	2	2	2.1	2.1	2.1	131.26	0	7.1396	891780000	13	2.79359	0.00629354
98	A2APV2-3;E9PXE6;F8VPR2;A2APV2-2;A2APV2;F6XR20;Q6P247;A2AQW2;Q8BI52;A2AQW3	A2APV2-3;E9PXE6;F8VPR2;A2APV2-2;A2APV2	Formin-like protein 2	Fmnl2	29.2377	29.4157	29.3939	29.4776	29.5992	29.5647	29.5792	29.5495	29.6284	27	27	15	23.9	23.9	13.7	123.98	0	50.906	4770400000	140	1.88062	0.0312547
99	A2APX7;A2APX6;A2APX8;Q05BQ0;Q68V28;Q68V26;F6U9Y2;F7AMU5;Q3UQV9;A2APX9;K3W4P8;B2X2D5;Q3UF73;Q9JKC5;Q6QIY3-3	A2APX7;A2APX6;A2APX8	Sodium channel protein	Scn1a	28.6808	28.2843	28.344	28.7801	28.896	28.6462	29.012	28.9767	28.8652	42	21	19	22.4	13	12	226	0	148.81	2477200000	89	1.82383	0.0345679
100	A2AQ19;Q3UXG8	A2AQ19;Q3UXG8	RNA polymerase-associated protein RTF1 homolog	Rtf1	25.9218	26.0238	25.2853	26.0133	26.279	26.0362	24.1004	23.5643	24.0217	9	9	9	13.4	13.4	13.4	80.796	0	14.223	322470000	18	3.68423	0.00143778
101	A2AQ45;Q80TY0;A2AQ44;A2AQ42;A2AQ41;Q80TY0-4;A2AQ39	A2AQ45;Q80TY0;A2AQ44;A2AQ42;A2AQ41;Q80TY0-4	Formin-binding protein 1	Fnbp1	29.7902	29.6245	29.5253	29.6033	29.4434	29.6284	30.374	30.278	30.3735	24	24	2	40.9	40.9	4.4	68.977	0	77.033	5936600000	171	3.82274	0.00114482
102	A2AQA7;Q8CFQ3	A2AQA7;Q8CFQ3	Intron-binding protein aquarius	Aqr	28.6814	28.5692	28.5153	29.7112	29.4887	29.6563	27.0265	26.9626	26.3283	36	36	36	38.1	38.1	38.1	161.85	0	133.43	2438900000	132	4.73036	0.000272461
103	A2AQC3;Q6DI68;Q8C4G3;Q8C288;A2AUZ1;A2AUZ0;A2AQC9	A2AQC3;Q6DI68;Q8C4G3;Q8C288	Phospholipid-transporting ATPase	Atp9a	29.7416	29.4499	29.4786	29.8284	29.9845	30.025	29.412	29.4939	29.2651	27	27	3	29.9	29.9	4	124.46	0	92.942	4227500000	165	2.30647	0.0146988
104	A2AQJ7;A2AQJ5;A2AQJ6;Q8BXN9-3;Q8BXN9;Q8BXN9-2	A2AQJ7;A2AQJ5;A2AQJ6;Q8BXN9-3;Q8BXN9;Q8BXN9-2	Transmembrane protein 87A	Tmem87a	26.4672	26.06	26.4587	26.975	26.4904	26.2278	25.1349	25.2351	24.8275	9	9	9	19.4	19.4	19.4	57.011	0	24.284	482220000	30	2.86557	0.00556509
105	A2AQK4;Q91VF2	A2AQK4;Q91VF2	Histamine N-methyltransferase	Hnmt	26.8885	27.1036	27.0433	26.9082	26.4589	26.9884	27.6566	27.7989	27.2869	9	9	9	40.3	40.3	40.3	33.664	0	23.829	784890000	34	1.83248	0.0340541
106	Q8N9U3;Q8C113;A2AQN5;A2AQN4;Q9QXG4;Q8C1A8;Q8C141;F7CU63;D6RHA7;Q8BY91	Q8N9U3;Q8C113;A2AQN5;A2AQN4;Q9QXG4;Q8C1A8;Q8C141	Acetyl-coenzyme A synthetase, cytoplasmic	Acss2	29.2199	29.5025	29.1972	29.3334	29.7003	29.5386	28.9328	28.723	28.7902	19	19	19	36.7	36.7	36.7	78.82	0	80.223	3135500000	85	2.40395	0.0125482
107	Q05CC5;Q504N1;Q05DE4;B2RWT5;A2AR02;Q80VC1;A2AR01;Q3UZ38	Q05CC5;Q504N1;Q05DE4;B2RWT5;A2AR02;Q80VC1;A2AR01;Q3UZ38	Peptidyl-prolyl cis-trans isomerase G;Peptidyl-prolyl cis-trans isomerase	Ppig	27.8936	28.3095	28.3494	28.9842	28.4645	28.6348	26.6535	26.801	26.1736	8	8	8	25.1	25.1	25.1	46.291	0	41.12	1279800000	53	3.66841	0.00146774
108	A2AR56;Q6P5H6;B0R0D5;B0R0D4;Q6P5H6-2;F6XM46;Q8BXT6;Q6P5H6-4;Q6P5H6-3;Q8BX61;Q8BW31;F2Z484;F6XLQ6	A2AR56;Q6P5H6;B0R0D5;B0R0D4;Q6P5H6-2;F6XM46;Q8BXT6;Q6P5H6-4;Q6P5H6-3	FERM domain-containing protein 5	Frmd5	27.6753	27.9027	27.9897	27.1639	27.3732	27.6107	28.6007	28.5808	28.4783	18	18	18	37.4	37.4	37.4	64.919	0	81.066	1419800000	74	3.42902	0.00219796
109	A2AR99;Q9R1W5	A2AR99;Q9R1W5	Calcitonin gene-related peptide type 1 receptor	Calcrl	25.3058	24.7052	24.4492	25.4065	24.6575	23.9247	26.3892	26.6081	26.0602	3	3	3	7.3	7.3	7.3	53.264	0	16.727	388960000	14	1.86792	0.0320202
110	A2ARP8;Q9QYR6-2;Q9QYR6	A2ARP8;Q9QYR6-2;Q9QYR6	Microtubule-associated protein 1A;MAP1A heavy chain;MAP1 light chain LC2	Map1a	33.7097	33.8702	33.9742	34.2084	34.2537	34.3398	33.4833	33.5501	33.513	130	130	127	59.1	59.1	58.3	325.88	0	323.31	87076000000	1405	3.85277	0.00109378
111	A2AS57;Q8BXJ8;G5E8Y8;Q8BXJ8-2;Q80ZR3;Q8BM98	A2AS57;Q8BXJ8;G5E8Y8;Q8BXJ8-2	Zinc finger protein 385B	Zfp385b;Znf385b	28.2438	28.4789	28.5113	28.4317	28.3741	28.6894	25.4736	26.0119	25.6528	8	8	8	20.3	20.3	20.3	51.356	0	55.975	1226800000	41	5.36394	0.000112814
112	A2ASW4;Q9EQZ6-3;Q9EQZ6;Q571A8;A2ASW8;Q9EQZ6-2;Q9CS95	A2ASW4;Q9EQZ6-3;Q9EQZ6;Q571A8;A2ASW8;Q9EQZ6-2	Rap guanine nucleotide exchange factor 4	Rapgef4	30.7549	30.6226	30.5724	29.4354	29.7437	29.3458	31.6967	31.8906	31.585	41	41	40	44.4	44.4	43.4	115.49	0	323.31	12637000000	295	5.07731	0.000165516
113	A2ASY0;A2ASY1;Q5HZG4;Q8BKP6;Q505H1;Q05BL5	A2ASY0;A2ASY1;Q5HZG4;Q8BKP6;Q505H1;Q05BL5	Transcription initiation factor TFIID subunit 3	Taf3	24.1768	24.5446	24.9519	25.2832	25.6196	24.9357	24.3829	23.8597	24.3483	5	5	5	9.6	9.6	9.6	87.867	0	7.2103	100480000	9	1.66269	0.0458527
114	A2AT37;F6Q3G7	A2AT37		Upf2	26.8903	26.538	26.6614	26.7571	26.9058	27.0598	27.4705	27.3955	27.4151	19	19	19	18.7	18.7	18.7	147.55	0	27.108	711960000	45	2.79132	0.00631891
115	Q3TG07;A2ATI9;Q3TX06;Q3TIK1;Q99JX3;Q99JX3-2;A2ATI8;A2ATI6;Q3V458;Q922I9	Q3TG07;A2ATI9;Q3TX06;Q3TIK1;Q99JX3;Q99JX3-2;A2ATI8;A2ATI6;Q3V458	Golgi reassembly-stacking protein 2	Gorasp2	27.9626	28.6485	28.0857	28.2273	27.9726	28.0065	27.2778	27.3768	26.6922	10	10	10	29.7	29.7	29.7	44.999	0	40.449	1966500000	62	2.03438	0.0238476
116	A2ATL0;A2ATK9;A2ATL1;Q8K2R1;A2ATK8	A2ATL0;A2ATK9;A2ATL1;Q8K2R1		Fam171a1	23.933	23.6904	23.8104	23.8522	23.5639	23.7871	24.3783	24.5394	24.5542	6	5	5	8.9	7.9	7.9	97.237	0	5.4481	99927000	13	3.24147	0.00296064
117	Q3TYI5;A2ATZ8;Q8R0S4;Q8R0S4-2;Q8R0S4-1;J3QK20;O88518	Q3TYI5;A2ATZ8;Q8R0S4;Q8R0S4-2;Q8R0S4-1;J3QK20	Voltage-dependent L-type calcium channel subunit beta-4	Cacnb4	30.673	30.7515	30.8504	30.6291	30.7829	30.7166	32.0321	31.9352	31.8288	21	21	10	51.7	51.7	29.9	57.662	0	323.31	11812000000	306	5.34376	0.000115421
118	A2AU91;P70399;A2AU89;P70399-3;P70399-2;Q3V1P7;Q8C0U1;Q8BZ87;F6ZRL3;Q3UG49;Q8BLA0;A2AU90;F6S5E4;F6QNC8	A2AU91;P70399;A2AU89;P70399-3;P70399-2;Q3V1P7;Q8C0U1;Q8BZ87	Tumor suppressor p53-binding protein 1	Trp53bp1;Tp53bp1	28.5755	28.3076	29.0528	28.9414	29.0414	29.0264	27.5188	27.7045	27.8154	27	27	27	23	23	23	212.73	0	220.65	2415100000	101	2.91625	0.00512471
119	A2AUX3;B7ZD29;Q3U2G7;Q3UHC7-4;Q3UHC7-3;Q3UHC7;F6RK07;Q3UHC7-2;F6Y0W2;D6RDE3	A2AUX3;B7ZD29;Q3U2G7;Q3UHC7-4;Q3UHC7-3;Q3UHC7;F6RK07;Q3UHC7-2	Disabled homolog 2-interacting protein	Dab2ip	28.6888	28.4043	28.5028	28.3721	28.2166	28.338	28.8239	28.8579	28.8565	36	32	4	39.6	37.3	2.7	125.11	0	81.134	2550700000	103	2.83752	0.00583807
120	A2AVJ7;Q99PL5;Q6ZPS0;Q99PL5-10;Q99PL5-9;Q99PL5-8;Q99PL5-7;Q99PL5-6;Q99PL5-5;Q99PL5-4;Q99PL5-3;Q99PL5-2;Q8C7E8;Q99PL5-12;Q99PL5-11;Q8CAB9;Q3ULC0;Q3T9Z9-4	A2AVJ7;Q99PL5;Q6ZPS0	Ribosome-binding protein 1	Rrbp1	30.2748	30.1854	29.9289	30.1809	30.157	29.9213	29.7699	29.6766	29.7159	36	36	36	32.2	32.2	32.2	158.39	0	275.03	6831300000	203	1.72235	0.0412703
121	A2AW05;Q05DR5;Q08943;Q08943-2	A2AW05;Q05DR5;Q08943;Q08943-2	FACT complex subunit SSRP1	Ssrp1	30.1794	30.1472	30.3438	30.7292	30.7486	30.6933	28.2995	28.2484	28.9139	22	22	22	42.5	42.5	42.5	71.527	0	250.76	6020700000	146	4.37472	0.000484597
122	A2AWF8;A2AWF9;E9Q4S7;Q64455;Q61373;Q3V2L7	A2AWF8;A2AWF9;E9Q4S7;Q64455;Q61373	Protein-tyrosine-phosphatase;Receptor-type tyrosine-protein phosphatase eta	Ptprj	27.6978	27.4279	27.6586	26.4096	27.0121	26.8561	27.7776	27.8552	27.8372	12	12	12	14.5	14.5	14.5	128.71	0	30.654	955450000	48	2.8332	0.00587486
123	A2AWI7	A2AWI7		Sh3glb2	31.605	31.7689	31.5541	31.1143	31.1352	31.0678	32.506	32.4547	32.5422	20	20	1	53.2	53.2	4.2	44.907	0	323.31	24548000000	424	5.93997	5.60925e-05
124	A2AWN8;P59326;Q3TH60;Q3U8D6;Q8BUI8	A2AWN8;P59326;Q3TH60	YTH domain-containing family protein 1	Ythdf1	27.9268	27.4483	27.7792	27.8045	27.6875	27.8729	26.0049	26.6043	27.0096	12	12	6	27.6	27.6	17.9	63.899	0	76.228	1145300000	33	2.23356	0.016702
125	A2AWP6;A2AWP8-3;A2AWP8-2;A2AWP8-4;A2AWP8;A2AWP8-5;F6S3V7;A2AWP4;Q922V5;A4FUT6;F6ZH54	A2AWP6;A2AWP8-3;A2AWP8-2;A2AWP8-4;A2AWP8;A2AWP8-5;F6S3V7	Rho guanine nucleotide exchange factor 10-like protein	Arhgef10l	27.3194	27.2359	27.6109	27.7059	27.6822	27.3918	28.2011	28.107	28.0388	19	19	18	24.4	24.4	23.7	113.98	0	95.531	1031400000	62	2.44819	0.0116151
126	Q9DBH1;A2AWT7;A2AWT6;P25976-2	Q9DBH1;A2AWT7;A2AWT6;P25976-2	Nucleolar transcription factor 1	Ubtf	29.7653	29.441	29.5402	30.4751	30.4502	30.0572	27.7847	28.1797	27.4345	28	28	1	38	38	1.1	88.356	0	126.12	4935900000	157	4.13227	0.000702662
127	A2BDX0;Q6ZQ47;Q3UYC8;Q5BL11;Q5RKY4;Q9Z103;Q8BNY2	A2BDX0;Q6ZQ47;Q3UYC8;Q5BL11;Q5RKY4;Q9Z103	Activity-dependent neuroprotector homeobox protein	Adnp	28.6262	28.6584	28.5313	29.3592	29.1174	29.0495	26.6726	26.4286	26.4188	31	31	31	32.7	32.7	32.7	124.31	0	66.562	1996900000	77	6.19315	4.61091e-05
128	A2BE28-2;A2BE28	A2BE28-2;A2BE28	Ribosomal biogenesis protein LAS1L	Las1l	25.5198	26.4323	26.5123	27.1869	26.5757	26.7295	25.4022	25.5771	25.0948	11	11	11	17.8	17.8	17.8	87.577	0	34.78	439000000	31	1.96203	0.0270611
129	A2BE93;Q5U445;Q3T9S3;Q9EQU5;A2BE92;Q9EQU5-2;Q9EQU5-3;Q9CRT3	A2BE93;Q5U445;Q3T9S3;Q9EQU5;A2BE92;Q9EQU5-2;Q9EQU5-3	Protein SET	Set;BC085271	30.2245	29.6836	30.112	29.287	29.6122	29.383	27.1071	27.7151	27.5652	9	9	9	54.4	54.4	54.4	24.923	0	48.354	4390600000	63	4.26665	0.000558774
130	Q6GSP7;A2BG76;I7HIP8;A2BG75;A2BG77;P97863-3;P97863-2;P97863;Q8C434;Q8BN68;Q3UFE1;A2ADI3;J3JS90	Q6GSP7;A2BG76;I7HIP8;A2BG75;A2BG77;P97863-3;P97863-2;P97863;Q8C434;Q8BN68;Q3UFE1;A2ADI3;J3JS90	Nuclear factor 1;Nuclear factor 1 B-type	Nfib	28.5633	28.5767	27.8311	29.4393	30.1026	29.8496	26.5229	26.577	26.4323	14	11	11	50.2	46.2	46.2	47.471	0	73.095	2473100000	47	4.34842	0.000499086
131	E9QAQ7;A2BH40;A2BH40-3;A2BH40-4;A2BH40-2;Q8C846;Q8R024	E9QAQ7;A2BH40;A2BH40-3;A2BH40-4;A2BH40-2	AT-rich interactive domain-containing protein 1A	Arid1a	27.8176	27.9505	28.0804	28.3067	28.4408	28.6552	25.8597	25.9076	26.3284	26	23	22	16.2	14.5	14.2	242.67	0	76.057	1105900000	76	4.93232	0.000202377
132	A2BI30;F6ZGR6;D3YZ21;Q8BXF0	A2BI30;F6ZGR6;D3YZ21		RP24-297H17.3;D430041D05Rik	32.3357	32.18	32.5091	31.8272	31.6624	31.4447	32.2067	32.5196	32.6169	21	21	21	19.9	19.9	19.9	181.02	0	169.11	19630000000	117	2.37619	0.0131215
133	Q920G6;A2BI31;O55186	Q920G6;A2BI31;O55186	CD59A glycoprotein	CD59A;Cd59a	26.0681	25.8657	25.5605	26.5723	26.8465	27.2659	25.2362	25.4904	24.0461	3	3	3	22.8	22.8	22.8	13.674	0	10.981	438870000	16	2.02534	0.0242634
134	F6QYT9;A2CG49-2;A2CG49;A2CG49-7;A2CG49-9;A2CG49-8;B1B1A7;D3Z560;D3Z559;A2CG49-5;D3Z534;D3Z532;D3Z535;D3Z4R2;A2CG49-4;A2CG49-6	F6QYT9;A2CG49-2;A2CG49;A2CG49-7;A2CG49-9;A2CG49-8;B1B1A7;D3Z560;D3Z559;A2CG49-5	Kalirin	Kalrn	26.2136	25.5883	25.9143	24.267	24.8684	23.0051	27.3037	27.1869	27.0107	24	13	12	10	5.7	5.7	270.65	0	18.668	460220000	28	2.74438	0.00690419
135	A2RS22;Q9WUM3;D3YUG6	A2RS22;Q9WUM3	Coronin;Coronin-1B	Coro1b	31.0621	30.7065	30.6328	30.4284	30.661	30.8504	31.5386	31.4812	31.4859	18	18	18	44.6	44.6	44.6	53.912	0	161.52	12417000000	244	2.59675	0.00891144
136	Q9CR32;A2RS68;Q62376;Q6ZWP0;Q62376-2;Q7TT81	Q9CR32;A2RS68;Q62376;Q6ZWP0;Q62376-2;Q7TT81	U1 small nuclear ribonucleoprotein 70 kDa	Snrnp70	30.4799	30.2019	30.0674	30.9429	31.0063	31.1316	28.8105	28.5794	28.9823	21	21	21	65.3	65.3	65.3	29.421	0	141.7	9505100000	168	4.8691	0.000223449
137	A2RSB1;B7ZNL2;Q8C1W9;Q78ZA7	A2RSB1;B7ZNL2;Q8C1W9;Q78ZA7	Nucleosome assembly protein 1-like 4	Nap1l4	30.3578	30.3549	30.4035	30.2253	30.3388	30.2104	30.6885	30.8281	30.777	12	12	10	42.1	42.1	39.5	42.679	0	274.16	9806400000	128	3.95611	0.000928479
138	A2RSF1;Q8K4M5;Q3UGT3;G8JL54;F7BCN0;F7BZY0;Q8VI86	A2RSF1;Q8K4M5;Q3UGT3;G8JL54;F7BCN0;F7BZY0;Q8VI86	COMM domain-containing protein 1	Commd1;Gm28048	26.0971	25.9619	25.4938	27.0138	27.2866	26.5558	26.6879	27.3156	27.0638	4	4	4	28.7	28.7	28.7	20.996	0	15.7	637460000	20	2.05711	0.0229119
139	A2RSJ4;Q8C318;Q922V6;Q9D574	A2RSJ4	UHRF1-binding protein 1-like	Uhrf1bp1l	27.9286	28.1344	28.2783	27.4753	27.4448	27.2948	28.1434	28.0677	28.2636	25	25	23	22.4	22.4	21.5	161.94	0	50.738	1650800000	78	3.20701	0.00314564
140	A2RSQ0	A2RSQ0	DENN domain-containing protein 5B	Dennd5b	27.2814	26.976	26.5001	26.2699	26.363	26.5188	28.3385	28.0854	27.4926	17	15	15	17.5	15.6	15.6	144.63	0	19.561	918290000	29	2.42895	0.0120332
141	A2RSW6;Q8CFA2	A2RSW6;Q8CFA2	Aminomethyltransferase;Aminomethyltransferase, mitochondrial	Amt	28.4478	28.6709	28.707	28.9747	28.561	29.0469	29.4901	29.3411	29.2146	13	13	13	40.4	40.4	40.4	44.008	0	133.18	2228000000	69	2.08384	0.0218935
142	A2RT28;Q499X9	A2RT28;Q499X9	Methionine--tRNA ligase, mitochondrial	Mars2	27.4525	27.3669	27.5754	28.5453	28.4163	28.3892	28.273	28.2837	28.2125	13	13	13	31.4	31.4	31.4	65.804	0	138.13	1332600000	84	4.90434	0.000210284
143	A2RT57;Q9CQC8;Q9CQC8-2	A2RT57;Q9CQC8;Q9CQC8-2	Maspardin	Spg21	21.7814	22.4088	23.4283	23.5391	24.5097	24.7307	24.5842	24.4015	24.6465	2	2	2	9.1	9.1	9.1	34.952	0.00044196	4.0082	103380000	6	1.86438	0.0321776
144	B2RPY3;A2RT62	B2RPY3;A2RT62	F-box/LRR-repeat protein 16	Fbxl16	28.6753	28.9853	28.8434	28.7773	28.9456	28.8486	29.2167	29.1819	29.1537	19	19	19	53.9	53.9	53.9	51.878	0	193.88	2639500000	118	1.97759	0.0263886
145	A2RTI3;O89017;Q3UE99	A2RTI3;O89017	Legumain	Lgmn	26.3566	25.9756	25.9792	26.8178	26.3795	27.0793	24.8767	25.2984	25.8111	7	7	7	23.4	23.4	23.4	49.372	0	14.752	458730000	17	2.0766	0.022136
146	C8YIX4;Q8CHP4;Q8CHP3;Q3UM93;Q3ULZ7;A2VCP3;Q9Z1M0;Q3UN00;Q3TBP1;F8WI93;Q6P5P0	C8YIX4;Q8CHP4;Q8CHP3;Q3UM93;Q3ULZ7;A2VCP3;Q9Z1M0;Q3UN00;Q3TBP1;F8WI93	P2X purinoceptor;P2X purinoceptor 7	P2rx7	26.5679	26.6796	26.5414	25.7396	26.2248	25.5835	26.8516	27.2707	26.966	9	9	9	19.3	19.3	19.3	67.773	0	19.649	638630000	30	2.62757	0.00848819
147	A3KG01;A3KG02;A3KG00;Q6P5F1;P54763;P54763-2;F6Q4H2;E9PUK8;Q3V2Z8;Q03145;A2BDW0;Q7TMU1;P35991	A3KG01;A3KG02;A3KG00;Q6P5F1;P54763;P54763-2	Receptor protein-tyrosine kinase;Ephrin type-B receptor 2	Ephb2	29.207	29.3263	29.6533	29.3285	29.2219	29.0657	30.9123	30.8366	30.9935	35	35	30	48.3	48.3	42.1	109.9	0	243.98	6797300000	190	4.63785	0.000315281
148	A3KG93;Q6ZQ88;G8JL40;F6Z4I3;F6ZC60	A3KG93;Q6ZQ88;G8JL40	Lysine-specific histone demethylase 1A	Kdm1a	28.449	28.2892	28.085	27.9683	27.8904	28.0002	25.785	26.0894	25.5589	19	19	19	29.3	29.3	29.3	94.658	0	33.736	1085900000	66	5.12546	0.00015818
149	A3KGQ6;Q9D898	A3KGQ6;Q9D898	Actin-related protein 2/3 complex subunit 5;Actin-related protein 2/3 complex subunit 5-like protein	Arpc5l	30.0788	30.7689	30.781	29.8342	29.909	30.0919	31.0698	30.9552	31.1958	8	8	8	67.3	67.3	67.3	17.109	0	241.83	9652600000	213	2.32108	0.0143431
150	B9EKJ1;A3KGU7;B2RXX6	B9EKJ1;A3KGU7;B2RXX6		Sptan1	36.9136	36.9003	36.9307	36.7572	36.7286	36.7891	37.389	37.333	37.4216	245	245	0	81.9	81.9	0	285.18	0	323.31	902140000000	9583	6.00918	5.38572e-05
151	A3KGV1-2;A3KGV1-3;A3KGV1-4;A3KGV1;A3KGV9;V9GXZ0;A3KGW0;A3KGV1-7;A3KGV1-6;A3KGV1-5;Q3UFG2	A3KGV1-2;A3KGV1-3;A3KGV1-4;A3KGV1	Outer dense fiber protein 2	Odf2	24.4861	24.2812	22.41	25.9531	25.9824	25.476	23.538	22.4746	22.3895	5	5	5	8.7	8.7	8.7	93.293	0	12.354	171980000	10	2.08226	0.0219292
152	A3KML3;F6YY69;F6VW30;P68254-2;P68254	A3KML3;F6YY69;F6VW30;P68254-2;P68254	14-3-3 protein theta	Ywhaq	33.4766	33.5669	33.627	33.021	33.0786	33.2651	33.5745	33.4634	33.5529	25	20	19	65.7	58.8	55.9	27.778	0	323.31	72611000000	598	2.71062	0.00731243
153	A3KN70;Q8CHG1;Q9JLM8;Q9JLM7;Q8VDT3;Q80VB6;Q3UGP0;Q8BRN4;Q9JLM8-2	A3KN70;Q8CHG1;Q9JLM8;Q9JLM7;Q8VDT3;Q80VB6;Q3UGP0;Q8BRN4;Q9JLM8-2	Serine/threonine-protein kinase DCLK1	Dclk1	30.4398	30.3569	30.4452	29.0352	29.2978	29.2063	30.6986	30.9268	30.8247	22	21	9	34.5	33.5	13.9	82.191	0	281.64	6980300000	202	5.46977	9.73357e-05
154	A4FU75;Q6WQJ1;S4R2M3	A4FU75;Q6WQJ1	Sn1-specific diacylglycerol lipase alpha	Dagla	30.9545	30.7151	30.7832	28.8887	29.0521	28.8629	31.9061	31.769	32.0167	33	33	33	34.8	34.8	34.8	115.24	0	323.31	10576000000	373	6.6524	2.47018e-05
155	A4FUQ0;P60191	A4FUQ0;P60191	Regulating synaptic membrane exocytosis protein 4	Rims4	28.5771	28.6996	28.8987	27.1591	26.8519	26.5815	29.4598	29.2367	29.2218	10	10	7	48.1	48.1	33.6	29.198	0	50.198	2453400000	66	4.78118	0.000253726
156	A4FUS1;Q641N3;Q5CZY9;P14131	A4FUS1;Q641N3;Q5CZY9;P14131	40S ribosomal protein S16	Rps16	31.9187	31.7121	31.5206	31.4662	31.7772	31.6314	30.8657	30.7925	30.6003	10	10	10	54.1	54.1	54.1	16.445	0	105.47	14953000000	296	3.15639	0.00343608
157	A4PI81;Q8BYR5-2;E9Q835;S4R1C6;Q8BYR5-4;Q8BYR5-3;Q8BYR5;E9Q5C0;E9PVF7;Q8BYR5-5;A4PI82;F6SH36;Q8BYR5-6;A4PI83;A4PI84;A4PI80;Q8BYR5-7	A4PI81;Q8BYR5-2;E9Q835;S4R1C6;Q8BYR5-4;Q8BYR5-3;Q8BYR5;E9Q5C0;E9PVF7;Q8BYR5-5;A4PI82;F6SH36;Q8BYR5-6;A4PI83	Calcium-dependent secretion activator 2	Cadps2	32.4911	32.3784	32.4453	30.7007	30.7974	30.7795	33.3828	33.386	33.3474	68	57	57	60	50.8	50.8	148.55	0	323.31	34386000000	663	8.76266	3.76876e-06
158	D3Z376;S4R217;D3Z119;D3Z118;A5A8K4;P97411-2;P97411;F7BG11;F6UY19;D3Z020	D3Z376;S4R217;D3Z119;D3Z118;A5A8K4;P97411-2;P97411	Islet cell autoantigen 1	Ica1	28.1294	28.2853	28.1571	27.4771	27.6164	28.0653	28.5836	28.4953	28.8595	10	10	10	35.7	35.7	35.7	32.617	0	33.954	1870300000	32	2.2635	0.0158595
159	A6H5Z3;A6H5Z3-2;Q6PCN5;Q8C1X1;Q5DU10;E0CXR2;Q8C203;Q9D4R7;E0CY34;Q8K2N8	A6H5Z3;A6H5Z3-2;Q6PCN5	Exocyst complex component 6B	Exoc6b	28.2072	28.543	28.4881	28.5298	28.3793	28.5001	29.0442	29.1606	29.1542	27	27	26	38.1	38.1	37.2	94.128	0	102.76	2346600000	103	3.20859	0.00313662
160	B7ZMT4;F6U6S4;F7DAC7;E0CX99;A6H603-3;A6H603-2;A6H603;E0CYZ6;A6H603-4	B7ZMT4;F6U6S4;F7DAC7;E0CX99;A6H603-3;A6H603-2;A6H603;E0CYZ6;A6H603-4	NACHT domain- and WD repeat-containing protein 1	Nwd1	24.9985	24.8744	24.2567	24.0877	24.2592	24.2372	26.2628	26.8391	26.2908	15	15	15	16.2	16.2	16.2	135.5	0	14.892	240530000	22	3.66067	0.0014864
161	A6H624;Q9D0E3	A6H624;Q9D0E3	LysM and putative peptidoglycan-binding domain-containing protein 1	Lysmd1	27.2246	27.9038	27.0182	26.0897	26.2058	25.5353	27.3596	27.5215	27.121	7	5	5	32.7	28.3	28.3	24.813	0	9.6887	527250000	33	2.38115	0.0129972
162	A6H630;A6H630-2;A6H630-4;D6RG65;A6H630-3	A6H630;A6H630-2	Protein-glutamate O-methyltransferase	Armt1	28.7664	28.8017	28.3279	28.8516	28.4021	28.567	29.4621	29.3274	29.2207	15	15	15	41.7	41.7	41.7	50.548	0	73.459	3143700000	58	2.03991	0.0236207
163	A6H6A9-3;Q9CRQ7	A6H6A9-3;Q9CRQ7	Rab GTPase-activating protein 1-like	Rabgap1l	26.4729	26.5567	25.8599	25.3644	25.5904	25.4774	26.9199	26.5851	26.1186	12	7	7	34.3	21.1	21.1	42.753	0	11.503	507760000	26	1.77818	0.0373989
164	A6PW47;Q99K74-2;Q99K74;Q99K74-3	A6PW47;Q99K74-2;Q99K74;Q99K74-3	Mediator of RNA polymerase II transcription subunit 24	Med24	25.5968	26.0047	25.6885	26.7135	25.751	25.872	24.3734	23.61	24.6537	11	11	11	18	18	18	111.86	0	35.714	302160000	28	2.33662	0.0139865
165	A6PWP3;Q7TNI6;Q923U0;Q8BZR6;Q923U0-3	A6PWP3;Q7TNI6;Q923U0;Q8BZR6;Q923U0-3	TOM1-like protein 1	Tom1l1	24.8563	24.7764	24.7088	23.9836	23.3214	23.6394	25.9289	26.4983	25.6979	7	7	7	37.2	37.2	37.2	21.564	0	7.7173	267030000	18	3.62032	0.00159624
166	B2RSI0;A6X8Z5	B2RSI0;A6X8Z5	Rho GTPase-activating protein 31	Arhgap31	25.4374	25.0163	24.9181	23.8117	23.7657	24.0377	26.3188	26.3789	24.9151	8	8	8	7.2	7.2	7.2	155.27	0	26.065	215570000	17	2.0727	0.0222636
167	A6X919;A6X919-2;A6X919-3	A6X919;A6X919-2	Probable C-mannosyltransferase DPY19L1	Dpy19l1	26.2632	25.8807	25.7899	27.3972	27.0079	27.0997	26.1695	25.7332	25.387	9	9	7	13.8	13.8	11.3	84.186	0	8.5683	467990000	24	2.65159	0.00811173
168	A7VJ98;Q9CQI3;Q80X87;D3YY93;D3Z2F6;D3YY16;A7VJA4;Q9ERL7	A7VJ98;Q9CQI3;Q80X87	Glia maturation factor beta	Gmfb	29.6631	29.7669	29.7388	29.3322	29.1486	29.2246	29.9882	30.2537	29.8835	7	7	7	54.2	54.2	54.2	16.722	0	91.15	5761400000	97	3.16575	0.0033857
169	A7VMV2;Q99KP3;Q9D221	A7VMV2;Q99KP3	Lambda-crystallin homolog	Cryl1	28.1785	28.5968	28.748	28.1772	28.1326	28.1946	28.7535	28.741	28.8704	16	16	16	76.2	76.2	76.2	35.208	0	83.403	1953900000	84	1.84019	0.033574
170	A8CVP4;A8CVP1;Q4ZJB3;E9QP62;Q99JW4;Q9D7B2	A8CVP4;A8CVP1;Q4ZJB3;E9QP62;Q99JW4;Q9D7B2	LIM and senescent cell antigen-like-containing domain protein 1	Lims1	27.7731	27.2136	26.611	27.1744	26.7011	26.5333	28.1905	28.0743	27.9466	10	10	8	36.9	36.9	30.8	37.241	0	21.699	1020700000	54	1.71287	0.041916
171	A8DUK7;A8DUK4;A8DUQ5;A8DUK2;A8DUQ1;A8DUN2;A8DUL2;A8DUL0;A8DUM2;E9Q223;A8DUL7;A8DUP7;A8DUK0;P02088;B1Q450;A8DUP3;A8DUL5;A8DUP5;Q54AH9;Q549D9;A8DV41;P02089;Q61650;CON__Q3SX09;Q61348;CON__P02070;P02104	A8DUK7;A8DUK4;A8DUQ5;A8DUK2;A8DUQ1;A8DUN2;A8DUL2;A8DUL0;A8DUM2;E9Q223;A8DUL7;A8DUP7;A8DUK0;P02088;B1Q450;A8DUP3;A8DUL5	Hemoglobin subunit beta-1	Hbbt1;Hbb-bs;Hbb-b1;HBB1	36.5543	36.5591	36.8008	35.9752	36.0866	36.4296	35.9817	36.0524	36.2538	16	16	1	84.4	84.4	11.6	15.721	0	323.31	473820000000	3403	1.71475	0.0417764
172	A8IK50;P12660;Q8CFD2	A8IK50;P12660	Purkinje cell protein 2	Pcp2	30.0536	30.5471	31.0293	29.4266	29.1661	29.4682	29.7932	29.9839	30.4833	6	6	6	70.6	70.6	70.6	14.784	0	116.35	6720900000	125	1.72497	0.0410492
173	A9C437;Q9R0A1;Q3TBI1;D6RFS3	A9C437;Q9R0A1;Q3TBI1	Chloride channel protein;Chloride channel protein 2	Clcn2	27.3503	27.4682	27.1724	26.7372	26.9496	26.418	28.1151	27.864	28.0153	14	14	14	20.3	20.3	20.3	97.697	0	167.95	1088600000	67	3.28969	0.00272918
174	A9UGK3;Q6VN19	A9UGK3;Q6VN19	Ran-binding protein 10	Ranbp10	26.2746	26.3397	26.2547	25.6386	25.955	25.753	26.6835	26.8334	26.8129	10	8	8	21.5	16	16	67.188	0	10.508	416810000	25	4.06548	0.000777594
175	B0FTY3;Q8R1N4;Q8R1N4-3;Q8R1N4-2;B1AS63;Q8R1N4-4	B0FTY3;Q8R1N4;Q8R1N4-3;Q8R1N4-2	NudC domain-containing protein 3	Nudcd3	27.5134	27.5304	27.9066	27.044	27.0114	26.9651	27.2337	27.4568	27.6893	9	9	9	30.6	30.6	30.6	40.89	0	34.774	976270000	53	1.86522	0.0321385
176	B0QZH6;Q80Y50-2;Q80Y50;B0QZH4;Q80Y50-4;Q80Y50-3;Q80Y50-5	B0QZH6;Q80Y50-2;Q80Y50;B0QZH4;Q80Y50-4;Q80Y50-3;Q80Y50-5	Calmodulin-binding transcription activator 2	Camta2	24.4326	24.1455	25.3187	24.9453	25.2242	24.678	23.5055	23.4264	23.1406	9	6	6	11.4	8.7	8.7	128.48	0	12.612	110530000	12	2.19384	0.0179488
177	Q8CHR4;O35619;B0QZN5;P63044	Q8CHR4;O35619;B0QZN5;P63044	Vesicle-associated membrane protein 2	Vamp2	33.201	33.5512	33.6484	32.7024	32.864	33.0259	33.9333	33.7781	34.0182	8	8	4	68.1	68.1	39.7	12.691	0	323.31	97789000000	827	2.94391	0.00489705
178	B0R091;P61022;B0R092	B0R091;P61022	Calcineurin B homologous protein 1	Chp1	27.9124	28.1626	28.3908	28.747	28.5678	28.7156	27.8129	28.0537	27.9904	10	10	10	57.1	57.1	57.1	21.997	0	104.76	2112200000	67	2.35833	0.0134984
179	B0V2N1-4;B0V2N1-3	B0V2N1-4;B0V2N1-3	Receptor-type tyrosine-protein phosphatase S	Ptprs	28.9708	28.9782	29.3445	28.775	28.4351	28.8561	29.3317	29.4594	29.4479	41	29	1	39.5	29.7	0.5	167.87	0	96.996	2810100000	131	2.0798	0.0220091
180	B0V2Q7;Q3UN02;B0V2Q9	B0V2Q7;Q3UN02	Lysocardiolipin acyltransferase 1	Lclat1	26.249	25.9728	26.3348	25.1622	25.6449	25.5215	25.6826	25.88	25.933	7	7	7	22.1	22.1	22.1	44.399	0	13.699	342040000	28	1.97858	0.0263585
181	B2RSE4;B0V2V8;Q3UH70;Q9ESU6-2;Q9ESU6;Q3U3Z2;Q3SYK2;B0V2V6;Q63ZX2;O35692;D6RGP2;Q91Y44	B2RSE4;B0V2V8;Q3UH70;Q9ESU6-2;Q9ESU6;Q3U3Z2;Q3SYK2;B0V2V6;Q63ZX2	Bromodomain-containing protein 4	Brd4	27.668	27.2139	27.9684	28.2066	28.247	28.5979	25.4637	25.5854	25.8629	17	12	11	33.5	27	25.2	80.604	0	31.64	1008700000	40	4.26579	0.000559007
182	B1AQX9;Q9QWI6-2	B1AQX9;Q9QWI6-2		Srcin1	31.7623	32.0026	32.2812	31.386	31.5583	31.5564	32.783	32.7476	32.9643	68	68	0	66.4	66.4	0	130.61	0	323.31	26795000000	638	3.60439	0.00163922
183	B1AQZ0;B1AQY9;Q8CHH9;Q8CHH9-2;B7ZC46;E0CYM4	B1AQZ0;B1AQY9;Q8CHH9;Q8CHH9-2;B7ZC46	Septin-8	2008-09-01	33.0275	32.9379	32.9636	32.1833	32.5479	32.4044	33.5051	33.6364	33.528	30	30	26	64.9	64.9	56.6	55.874	0	323.31	54406000000	697	4.27077	0.000557019
184	Q3TET1;Q3UI47;B1AQZ2;P28741;Q80UK1;Q3TSP1;Q3TTS7;Q8CGJ1;F6V6Z9;B1AQZ5;Q8C901;E9PX57	Q3TET1;Q3UI47;B1AQZ2;P28741;Q80UK1;Q3TSP1;Q3TTS7;Q8CGJ1	Kinesin-like protein;Kinesin-like protein KIF3A	Kif3a	27.9458	27.9627	28.092	26.7243	27.0153	27.1448	27.9738	27.4992	27.7066	19	19	17	31	31	27.5	79.444	0	65.442	1267700000	58	2.85521	0.00566768
185	Q3UPK1;B1AR09;B1AR10;Q8VHB4;Q8CFR8	Q3UPK1;B1AR09;B1AR10;Q8VHB4		Mllt6	24.3079	25.0697	25.8204	27.0475	26.3797	27.7099	23.7996	24.0538	24.4278	4	4	4	6.1	6.1	6.1	95.711	0	32.847	489520000	14	2.55266	0.00964568
186	Q0VF62;B1AR74;Q8CCN5;Q3TAC0;F7C0F2;Q8CCN5-2;B1AR76;F7CPM1;Q5SWI1;B1B0B3	Q0VF62;B1AR74;Q8CCN5;Q3TAC0;F7C0F2;Q8CCN5-2	Breast carcinoma-amplified sequence 3 homolog	Bcas3	29.4231	29.6044	29.5928	28.8412	28.8313	28.6496	30.1379	30.1586	30.2637	25	25	25	38.4	38.4	38.4	99.464	0	89.58	3679300000	149	5.28157	0.000128203
187	B1ART2;B1ART1;V9GX23;Q6A066;F6XI52	B1ART2;B1ART1;V9GX23;Q6A066		Vps13d	27.3337	27.9348	27.6027	28.0473	28.0935	28.2478	28.2494	28.3004	28.0741	42	42	42	12.6	12.6	12.6	490.96	0	76.132	1378800000	118	1.67089	0.0450967
188	B1AS06;Q3TY61;Q6PFD5	B1AS06;Q3TY61;Q6PFD5	Disks large-associated protein 3	Dlgap3	27.859	28.093	28.2625	28.4531	28.7811	28.877	28.1006	28.2847	27.9542	21	21	21	31.9	31.9	31.9	104.67	0	93.205	1827200000	66	1.86416	0.0321824
189	B1AS29	B1AS29	Glutamate receptor ionotropic, kainate 3	Grik3	26.6771	26.8523	25.716	24.2983	24.4773	24.8796	28.7183	28.3614	27.1747	15	14	14	21	19.6	19.6	104.05	0	33.413	794270000	40	2.91913	0.0050942
190	B1ASC0;H7BX74;H7BWZ2;Q8CGM1-3;Q8CGM1;H7BX92;Q8CGM1-2;Q80T61	B1ASC0;H7BX74;H7BWZ2;Q8CGM1-3;Q8CGM1;H7BX92;Q8CGM1-2	Brain-specific angiogenesis inhibitor 2	Adgrb2;Bai2	25.2011	25.0582	25.2071	25.5419	26.6163	26.4098	25.3171	25.0795	25.1123	7	7	7	6.8	6.8	6.8	160.56	0	21.655	229320000	18	1.81378	0.0351055
191	Q3URA1;B7ZN32;B1ASD1;P17012;Q99NJ4;H6U8U5	Q3URA1;B7ZN32;B1ASD1;P17012	Zinc finger X-chromosomal protein	Zfx	25.4088	25.0764	24.7441	26.4376	25.2554	26.2784	24.2701	24.0984	24.0593	8	8	1	26.6	26.6	5.2	42.925	0	12.099	254310000	19	2.28819	0.0151653
192	B1AT82;Q9D0M1;Q8BK29;B1AT84;B1AT83	B1AT82;Q9D0M1;Q8BK29	Phosphoribosyl pyrophosphate synthase-associated protein 1	Prpsap1	29.3385	29.3042	29.4304	29.5253	29.5325	29.6538	29.8075	29.7478	29.7145	13	12	12	48.3	44.7	44.7	42.467	0	148.29	3356300000	101	3.1503	0.00346113
193	B1ATI9;Q3U432;Q0VBR8;Q3U8N2;Q6A075;Q60780-2	B1ATI9;Q3U432;Q0VBR8;Q3U8N2;Q6A075;Q60780-2	Growth arrest-specific protein 7	Gas7	29.3424	29.2695	29.0301	28.7672	28.6499	28.1202	29.9249	29.8158	29.6873	14	14	1	42.7	42.7	7	47.261	0	153.72	4476900000	119	2.85068	0.00570575
194	B1ATP7;Q3U0M8;Q80Y81-2;Q80Y81;B1ATP9	B1ATP7;Q3U0M8;Q80Y81-2;Q80Y81	Zinc phosphodiesterase ELAC protein 2	Elac2	27.618	27.5563	28.3752	27.6136	27.7922	27.9285	26.7618	26.7056	26.5883	16	16	16	27.3	27.3	27.3	91.946	0	28.307	1000500000	61	2.39975	0.0126395
195	B1ATS5;E9Q559;Q64518-3;Q64518;B1ATS4;Q8R0X5;Q64518-2;Q8C213;Q3U1K2;Q3U6T4;Q8K3Y5;Q91YM6	B1ATS5;E9Q559;Q64518-3;Q64518;B1ATS4;Q8R0X5;Q64518-2;Q8C213;Q3U1K2	Calcium-transporting ATPase;Sarcoplasmic/endoplasmic reticulum calcium ATPase 3	Atp2a3	32.6364	32.4311	32.4474	31.387	31.2844	31.1306	33.2685	33.0716	33.1015	50	41	36	48.7	42.6	40.5	111.71	0	323.31	37896000000	890	5.49596	9.71794e-05
196	B1ATV3;Q2VPD3;Q32MT5;Q9QZC1;Q8BNT8;E6Y6Q0;Q8CCQ1;Q3UZG1;Q61143;G3UZW6;G3UWT1;G3UWI6;Q3UXW9;E9PVJ9;Q0VFY2;Q9WVC5;Q6NV56	B1ATV3;Q2VPD3;Q32MT5;Q9QZC1;Q8BNT8;E6Y6Q0;Q8CCQ1	Short transient receptor potential channel 3	Trpc3	27.9353	28.094	28.1842	25.995	26.2553	25.6532	29.3563	29.3142	28.9854	19	19	19	26.5	26.5	26.5	103.62	0	32.22	1782700000	83	5.24395	0.000134756
197	B1ATZ0;B1ATZ1;Q3TLL4;Q3UMA3;Q99LI8;B1ATY9;F6VV02	B1ATZ0;B1ATZ1;Q3TLL4;Q3UMA3;Q99LI8;B1ATY9	Hepatocyte growth factor-regulated tyrosine kinase substrate	Hgs	30.2005	30.2456	30.1911	29.9562	29.9523	30.1253	30.2904	30.4776	30.4275	23	23	23	28.9	28.9	28.9	85.778	0	267.54	7834300000	145	2.46379	0.0113122
198	B1AU25;Q9Z0X1;Q1L6K5;Q2QKE3	B1AU25;Q9Z0X1	Apoptosis-inducing factor 1, mitochondrial	Aifm1	31.9754	31.7783	31.9847	32.5851	32.4883	32.366	31.5023	31.6501	32.023	32	32	31	62.2	62.2	60.2	66.113	0	323.31	27827000000	456	2.2772	0.0154634
199	B1AU76;B1AU75;Q99MD9;Q99MD9-2;Q3TTH5	B1AU76;B1AU75;Q99MD9;Q99MD9-2	Nuclear autoantigenic sperm protein	Nasp	26.4153	27.2745	26.2094	25.6883	26.4279	25.9833	24.4273	24.6658	23.1957	9	9	9	28.3	28.3	28.3	48.765	0	35.943	428780000	20	2.30845	0.0146719
200	Q3TZ53;B1AV35;Q05AA6;Q8CBX2	Q3TZ53;B1AV35;Q05AA6	Dystrophin-related protein 2	Drp2	26.2138	26.4462	25.8786	25.7734	26.2131	26.1741	27.149	27.2826	27.132	12	11	11	17.3	16.4	16.4	108.99	0	25.289	419250000	36	2.84279	0.00578896
201	Q3U4G8;B1AVH4;Q8C0P5;Q8BLN0;Q8R0L6;Q3U8R5;Q6NVB7	Q3U4G8;B1AVH4;Q8C0P5;Q8BLN0	Coronin;Coronin-2A	Coro2a	28.82	28.9096	28.7887	28.6589	28.8113	28.6096	29.3303	29.1786	29.2835	16	16	1	32.8	32.8	1.3	59.601	0	41.289	2400800000	90	3.39522	0.00232555
202	B1AWC9;B1AWC8;Q8VBU5;Q9QXI7;Q8BQB2;B1AWD1;Q3TTI9;Q6IQY6;Q91VY2;B1AWD0;G3UZ46;Q80VK8;G3UWT3;Q3UEI1-2;Q3UEI1;Q80UU8;D3Z2G1	B1AWC9;B1AWC8;Q8VBU5;Q9QXI7;Q8BQB2;B1AWD1;Q3TTI9;Q6IQY6;Q91VY2;B1AWD0		Pde4b	29.0513	29.2757	29.1952	28.8982	28.9664	28.8539	29.7006	30.0083	30.1517	23	23	18	37.8	37.8	32.1	83.301	0	171.31	3860900000	139	3.42188	0.00221844
203	B1AWN6;Q62242;Q8CCS4;Q8CAJ8;Q68V27;Q8C274;A9JQD3	B1AWN6	Sodium channel protein	Scn2a1	31.1647	31.0754	30.8991	31.0249	30.6988	30.4931	32.3617	32.2164	32.1266	53	53	23	26.3	26.3	12.7	227.94	0	323.31	18210000000	463	3.8334	0.00112624
204	B1AWQ3;B1AWQ4;Q9ET47;B1AWP9;B1AWP7;B1AWQ0;B1AWP8;Q9QY28;B1AWQ1;Q9ET47-5;Q9ET47-4;Q9ET47-2;Q9ET47-3;Q9ET47-7;Q9ET47-6;Q9WUH6;Q3UM31;Q9DD12;Q9ET47-8	B1AWQ3;B1AWQ4;Q9ET47;B1AWP9;B1AWP7;B1AWQ0;B1AWP8;Q9QY28;B1AWQ1;Q9ET47-5;Q9ET47-4;Q9ET47-2;Q9ET47-3;Q9ET47-7;Q9ET47-6	Espin	Espn	22.9801	23.3252	23.2126	25.1414	23.6808	24.9293	26.1877	26.246	26.3302	4	4	4	7.9	7.9	7.9	91.785	0.00044843	4.3191	204850000	7	3.21978	0.00308311
205	B1AXS6;B1AXS8;B1AXS7;B1AXS5;Q9JLM4;B0R077;Q8CG95	B1AXS6;B1AXS8;B1AXS7;B1AXS5;Q9JLM4	Zinc finger MYM-type protein 3	Zmym3	26.9425	26.644	26.1266	27.6674	27.5683	27.0986	25.5208	26.0954	25.3476	10	10	10	10.7	10.7	10.7	142.06	0	9.5473	679120000	18	2.49342	0.0107061
206	B1AXZ4;B1AXZ5;Q3UR02;Q564D8;Q80Y51;Q60899;B1AXZ6;B1AXZ0;Q91XI8;Q80UJ0;Q91XI9;H3BLG7;B1AXZ3	B1AXZ4;B1AXZ5;Q3UR02;Q564D8;Q80Y51;Q60899;B1AXZ6;B1AXZ0;Q91XI8;Q80UJ0;Q91XI9	ELAV-like protein;ELAV-like protein 2	Elavl2	28.4176	28.7092	28.975	28.4986	28.1312	28.1154	26.1124	26.0111	26.2126	20	5	5	52.8	16.5	16.5	42.531	0	59.441	1039800000	38	4.91577	0.000207497
207	E9PV45;B1AY13;B1AY13-2	E9PV45;B1AY13	Ubiquitin carboxyl-terminal hydrolase;Ubiquitin carboxyl-terminal hydrolase 24	Usp24	29.9046	29.9254	29.653	29.0659	29.2402	29.1392	30.0337	30.2839	30.3193	59	59	59	29.8	29.8	29.8	294.13	0	185.76	4594200000	238	3.68074	0.00144174
208	B1AZ46;Q3UKP6;Q8BKX1-3;Q8BKX1-2;Q8BKX1;Q3TV50	B1AZ46;Q3UKP6;Q8BKX1-3;Q8BKX1-2;Q8BKX1;Q3TV50	Brain-specific angiogenesis inhibitor 1-associated protein 2	Baiap2	31.1268	31.1089	31.1586	30.4159	30.3296	30.0173	31.739	31.6639	31.756	30	30	2	63.3	63.3	5.2	57.681	0	288.95	12847000000	321	4.65816	0.000305997
209	B1AZI6;Q3US09;E9Q5E2;Q3UYT9;Q3UUT9;F6SBF2;Q8C690;Q3TPY8;F6QCT0;B1AZI7;F6RBN0	B1AZI6;Q3US09	THO complex subunit 2	Thoc2	29.1361	29.3333	28.9497	30.0912	30.1282	29.9525	27.6431	27.7103	27.4453	31	31	31	23.7	23.7	23.7	182.77	0	153.3	3129500000	129	5.5881	8.5784e-05
210	B1AZP2-2	B1AZP2-2	Disks large-associated protein 4	Dlgap4	28.533	28.8613	29.0213	27.7002	28.0929	28.102	29.4802	29.5938	29.6194	24	22	1	37.7	36.8	2.1	107.55	0	228.89	2886000000	124	3.69027	0.00142855
211	B1B1A8;Q6PDN3;Q6PDN3-3;Q6PDN3-2;Q6PDN3-4	B1B1A8;Q6PDN3;Q6PDN3-3;Q6PDN3-2	Myosin light chain kinase, smooth muscle;Myosin light chain kinase, smooth muscle, deglutamylated form	Mylk	27.2426	28.2146	27.0968	25.7437	27.0556	26.407	28.1546	28.8307	28.2444	11	11	11	6.7	6.7	6.7	213.61	0	18.332	1055900000	48	1.88493	0.0310365
212	B1B1B8;Q2M3X8-2;Q2M3X8;Q2M3X8-3;Q2M3X8-4	B1B1B8;Q2M3X8-2;Q2M3X8;Q2M3X8-3;Q2M3X8-4	Phosphatase and actin regulator;Phosphatase and actin regulator 1	Phactr1	24.6672	24.611	24.0355	23.5602	23.2946	23.3108	23.3606	23.5493	23.4511	4	2	2	6.8	4.3	4.3	63.109	0.0016529	2.6937	57448000	7	2.67033	0.00783014
213	B2CY77;P14206	B2CY77;P14206	40S ribosomal protein SA	Rpsa	32.8747	33.0141	33.081	33.289	32.8716	33.2181	31.9564	31.9045	31.858	14	14	14	58	58	58	32.85	0	323.31	39231000000	525	4.03623	0.000819324
214	B2KF50;Q570Z6;REV__Q9CXP8	B2KF50;Q570Z6		Uhrf1bp1	27.0205	27.3169	27.1245	26.4302	26.7175	26.6881	27.9167	27.8309	27.64	24	21	21	18.5	17.2	17.2	157.01	0	44.363	910190000	68	3.65819	0.0014918
215	B2KFW6;Q9QWH1-2;Q9QWH1;B1ASA3;B1ASA2	B2KFW6;Q9QWH1-2;Q9QWH1	Polyhomeotic-like protein 2	Phc2	25.5053	26.0585	26.2279	27.8794	27.5464	27.707	24.5021	24.3852	23.867	9	9	8	12.4	12.4	10.8	89.754	0	25.73	670160000	29	4.5366	0.000372353
216	B2KGA7;Q505B7-2;Q505B7;A8Y5E9	B2KGA7;Q505B7-2;Q505B7;A8Y5E9	Protein archease	Zbtb8os	25.0995	24.1901	24.017	23.0121	23.6931	22.7926	24.9877	24.9646	24.7978	2	2	2	13.2	13.2	13.2	19.58	0.00086593	3.5433	102020000	8	2.17565	0.0185733
217	B2LVG5;B2LVG6;E0CXT7;Q8BQZ5;F7B6Z5;Q8BQZ5-3;Q8BQZ5-2;M0QWM8	B2LVG5;B2LVG6;E0CXT7;Q8BQZ5;F7B6Z5;Q8BQZ5-3;Q8BQZ5-2	Cleavage and polyadenylation specificity factor subunit 4	Cpsf4	26.2245	25.9355	25.8947	26.5445	26.8954	27.1727	24.3561	24.3161	25.0121	5	5	5	30.9	30.9	30.9	27.419	0.00015321	4.901	323320000	19	3.56238	0.00175273
218	B2M1R6;P61979-3;Q3TL71;Q3U9Q3;Q3U6X2;H3BKD0;D3Z5X4;H3BKI8;H3BLP7;H3BJS9;Q8BT23;H3BJ43	B2M1R6;P61979-3;Q3TL71;Q3U9Q3;Q3U6X2;H3BKD0;D3Z5X4	Heterogeneous nuclear ribonucleoprotein K	Hnrnpk;Gm7964	34.8225	34.7028	34.3829	35.3516	35.0301	35.0708	33.2177	33.1026	32.7406	33	33	2	66.8	66.8	3	48.562	0	323.31	133810000000	1327	4.2796	0.000551046
219	B2RPU2	B2RPU2	Pleckstrin homology domain-containing family D member 1	Plekhd1	29.6316	29.1967	29.1146	27.6221	27.6409	27.6251	29.8336	29.9459	29.8658	17	17	17	39	39	39	59.096	0	42.531	3341000000	92	5.14928	0.00015473
220	E9PW14;B7SNM8;B2RPU6;B7ZMS8;Q9D067-2;Q9D067;E9Q0B1;B7SNM9;Q9D067-4;Q9D067-3	E9PW14;B7SNM8;B2RPU6;B7ZMS8;Q9D067-2;Q9D067;E9Q0B1;B7SNM9;Q9D067-4;Q9D067-3	Nuclear protein MDM1	Mdm1	25.0973	25.1564	22.9588	25.4524	26.0926	25.6653	23.1978	23.2431	23.6261	6	6	6	11.9	11.9	11.9	77.371	0	5.4818	192830000	12	1.62118	0.0492147
221	B2RPV4;Q66JV4;Q66JV4-2	B2RPV4;Q66JV4;Q66JV4-2	RNA-binding protein 12B-B	Rbm12b2	26.3234	26.721	26.3506	27.4853	27.5051	27.5486	24.4449	25.4256	26.4327	12	12	3	16.8	16.8	4.6	96.423	0	10.318	426710000	30	1.84503	0.0332604
222	B2RQ71;E9PWR4;Q69ZV2;Q6PGL8;Q5EBR0;Q6NY04;Q8CBE5	B2RQ71;E9PWR4;Q69ZV2;Q6PGL8;Q5EBR0;Q6NY04		Dip2c	29.3866	29.0883	29.1917	29.1415	29.2776	29.107	30.0186	29.6994	29.7902	43	31	2	34.4	24.9	1.3	170.92	0	153.03	3579200000	175	2.71147	0.0073023
223	B2RQ80;E9PUL9;B9EKN8;E0CY98;B2RXX2;P83510;E0CZD7;E0CXD6;P83510-2;E0CZF8;B2RY17;E0CYV5	B2RQ80;E9PUL9;B9EKN8;E0CY98;B2RXX2;P83510;E0CZD7;E0CXD6;P83510-2;E0CZF8;B2RY17	Traf2 and NCK-interacting protein kinase	Tnik	28.5512	28.6797	28.5522	27.9549	28.2399	28.3398	29.0183	29.0697	29.1046	30	18	18	25.9	18	18	154.94	0	88.147	1950000000	97	3.38904	0.00234442
224	E9QAI5;B2RQC6;G3UWN2;B2RQC6-2;Q6P9L1;E9QAT6;Q7TN13;Q80VF8;Q9CWQ9;F6S3Z3;O88862;Q561M8	E9QAI5;B2RQC6;G3UWN2;B2RQC6-2;Q6P9L1	CAD protein;Glutamine-dependent carbamoyl-phosphate synthase;Aspartate carbamoyltransferase;Dihydroorotase	Cad	29.935	30.0721	30.122	29.1602	29.2719	29.158	30.1075	30.1004	30.1872	59	59	58	38.6	38.6	38.3	236.25	0	182.41	4778600000	295	5.12575	0.000159104
225	B2RQF5;Q3UV20;P60755;F6UYI7	B2RQF5;Q3UV20;P60755	MAM domain-containing glycosylphosphatidylinositol anchor protein 2	Mdga2	24.6744	25.3573	25.645	23.4424	23.6445	24.2991	26.5355	26.2256	25.8905	9	9	9	11.7	11.7	11.7	107.52	0	12.155	275570000	19	2.86847	0.00553837
226	B2RQG2;Q80U54;Q4FZG1;Q8BLA7;A0PJJ1;Q8BU94;Q8VCJ7	B2RQG2;Q80U54		Phf3	25.6695	25.0911	24.7656	25.942	26.9419	26.6642	23.838	23.9367	24.648	13	13	13	8.2	8.2	8.2	225.54	0	14.748	300530000	24	2.59658	0.00891008
227	B2RQQ5;Q8CFR9;A0PJ96;Q3TZM8;Q3TYV8;Q8CAI9;Q3UPV4;Q3UF78	B2RQQ5		Map1b	33.4899	33.522	33.571	33.8213	33.7365	33.7254	32.996	32.9833	33.1557	90	87	1	49.7	48.8	0.5	270.3	0	323.31	61941000000	1135	4.44422	0.000434264
228	B2RQQ8;P08122;D3YV27	B2RQQ8;P08122	Collagen alpha-2(IV) chain;Canstatin	Col4a2	29.5337	29.6114	29.3221	28.6703	29.0615	28.9871	29.2027	29.3965	29.4734	13	13	12	13.3	13.3	12.8	167.32	0	111.76	3053100000	93	1.89922	0.0303406
229	E9Q896;B2RQR8;F6T2B3;E9QKA6;E9PUE3;Q8C099;E9Q1S5;Q80Z58;Q923T6;Q80Z57;Q80Z60;Q80Z60-2;Q8K0P0;F6WM66	E9Q896;B2RQR8;F6T2B3;E9QKA6;E9PUE3;Q8C099;E9Q1S5;Q80Z58;Q923T6;Q80Z57;Q80Z60;Q80Z60-2	Endothelin-converting enzyme 2;Methyltransferase-like region;Endothelin-converting enzyme 2 region	Ece2	25.7726	25.9515	26.1368	27.2441	26.2824	26.2057	23.8135	23.5421	23.9714	6	6	6	13.6	13.6	13.6	82.84	0.0016502	2.6739	263150000	9	3.66329	0.00148053
230	B2RQS6;Q8VHK9;A0JLR3	B2RQS6;Q8VHK9;A0JLR3	ATP-dependent RNA helicase DHX36	Dhx36	28.1361	27.9302	27.8087	28.3043	28.2491	28.3836	27.7474	27.9789	27.7927	25	25	23	31.1	31.1	30.1	113.84	0	69.522	1627100000	89	2.05943	0.0228079
231	Q3TXM3;B2RQX4;O35544	Q3TXM3;B2RQX4;O35544	Amino acid transporter;Excitatory amino acid transporter 4	Slc1a6	32.7205	33.2322	33.0138	30.7594	30.3145	30.5125	33.5639	33.7144	33.6419	14	12	12	26.9	22.6	22.6	60.774	0	323.31	48441000000	669	5.49009	9.71479e-05
232	D3YZN4;Q7TNG0;D3Z1Z1;B2RQY8;Q3ULF4;D3YXB7;F6W695;G3UX97;D3Z342;F6VTG4	D3YZN4;Q7TNG0;D3Z1Z1;B2RQY8;Q3ULF4;D3YXB7	Paraplegin	Spg7	28.2591	27.3857	27.7755	29.4272	28.9834	29.8279	28.8239	28.809	28.7566	26	26	26	48.7	48.7	48.7	75.002	0	266.22	2840000000	117	2.3993	0.0126403
233	B2RQZ6;Q8BWS5	B2RQZ6;Q8BWS5	G protein-regulated inducer of neurite outgrowth 3	Gprin3	26.6823	26.8151	27.7836	27.1726	26.5551	26.9928	25.3448	25.3575	24.3065	10	9	9	16.5	15.7	15.7	80.484	0	12.822	493380000	19	2.30384	0.0147545
234	B2RRB9;Q4QQM5;Q4QQM5-3;Q4QQM5-2	B2RRB9;Q4QQM5;Q4QQM5-3;Q4QQM5-2	Protein FAM73A	Fam73a	26.0995	26.6787	26.4124	26.9324	26.6964	26.9659	25.8414	25.637	25.9876	13	13	13	25.7	25.7	25.7	67.535	0	18.963	418510000	33	2.53377	0.00998522
235	B2RRD7;E9PXP1;Q80XK2;Q3U109;Q99JV4;Q8C905;Q8K2E3;Q9CTY1;Q2V6Q0	B2RRD7;E9PXP1;Q80XK2;Q3U109;Q99JV4;Q8C905;Q8K2E3;Q9CTY1		Brpf1	24.9324	24.5968	24.0304	24.9098	26.1759	25.8756	23.0818	23.9648	23.9658	10	10	2	11.3	11.3	3.2	137.31	0	5.8928	200690000	22	1.89401	0.0305613
236	B2RRE0;Q9WTQ5-2;Q9WTQ5;Q6IR43	B2RRE0;Q9WTQ5-2;Q9WTQ5	A-kinase anchor protein 12	Akap12	29.5835	29.6925	30.0417	29.3301	29.2647	29.1339	30.1062	30.306	30.4391	34	34	34	30.8	30.8	30.8	180.69	0	149.05	5410700000	221	2.93657	0.00496419
237	B2RRH9;Q3THK7	B2RRH9;Q3THK7	GMP synthase [glutamine-hydrolyzing]	Gmps	31.5011	31.6008	31.7043	31.2422	31.3147	31.3	30.6835	30.6144	30.7978	39	39	39	69.3	69.3	69.3	76.723	0	323.31	12597000000	338	4.51316	0.000387692
238	B2RRI2;Q689Z5;Q689Z5-2;Q3TMM7;I6L981;A0JLU6;Q3UPW9;Q8R594;Q7TNB8-3	B2RRI2;Q689Z5;Q689Z5-2;Q3TMM7;I6L981	Protein strawberry notch homolog 1	Sbno1	27.6492	27.9684	27.3998	27.9004	28.1173	27.6276	24.9673	24.6505	25.0864	30	30	22	29.3	29.3	22.7	153.92	0	60.626	876120000	67	4.93617	0.000201123
239	B2RRQ1;Q925H0-2;Q3UYD3;Q925H0;Q78E63	B2RRQ1;Q925H0-2;Q3UYD3;Q925H0	Acid-sensing ion channel 2	Asic2	25.1673	23.6157	24.0239	24.0379	23.4065	23.6741	25.3631	25.4984	25.316	5	5	5	15.6	15.6	15.6	63.204	0.00085714	3.3578	101660000	6	1.78119	0.0371659
240	D3Z4U0;B2RRT9;D3Z4T9;Q9R020;E9PUD0;Q9R020-2;V9GX51	D3Z4U0;B2RRT9;D3Z4T9;Q9R020;E9PUD0;Q9R020-2	Zinc finger Ran-binding domain-containing protein 2	Zranb2	28.4856	28.1587	27.6928	28.4956	29.0519	27.9021	26.6453	26.2934	26.0936	7	7	7	19.4	19.4	19.4	37.294	0	18.39	1447400000	49	2.6944	0.00752585
241	B2RRU7;Q9ESM3	B2RRU7;Q9ESM3	Hyaluronan and proteoglycan link protein 2	Hapln2	27.2293	26.995	27.2981	29.1778	30.3088	29.4254	23.6145	24.4471	23.7722	14	14	14	46	46	46	37.925	0	82.393	1864000000	66	4.91772	0.000207647
242	B2RRX2;P63328	B2RRX2;P63328	Serine/threonine-protein phosphatase;Serine/threonine-protein phosphatase 2B catalytic subunit alpha isoform	Ppp3ca	33.4985	33.5798	33.5438	33.2157	33.2635	33.3468	34.1749	34.0609	34.264	26	26	2	64.3	64.3	4.8	58.643	0	323.31	81792000000	1206	4.78192	0.00025389
243	B2RS09;Q7JJ13;Q7JJ13-2;I7HPW1;U3KLT0;G3UZR9;Q3TH63;S4R1Z1	B2RS09;Q7JJ13;Q7JJ13-2;I7HPW1	Bromodomain-containing protein 2	Brd2	27.0967	26.903	27.0851	27.1175	27.4528	27.194	24.7911	24.9271	24.8937	17	14	13	30.7	26.9	26.2	88.066	0	22.592	661450000	32	6.12369	5.02406e-05
244	B2RSC8;P46935;Q3TUU1;Q3V335;V9GWV8;A0JNZ0;V9GXK3;Q8BNU7;V9GXS6	B2RSC8;P46935	E3 ubiquitin-protein ligase NEDD4	Nedd4	29.7157	29.6488	30.113	29.2125	29.3676	29.3852	30.184	29.7954	29.8579	27	24	24	37	33.9	33.9	102.71	0	126.7	4441400000	165	1.75542	0.0388909
245	B2RSH2	B2RSH2	Guanine nucleotide-binding protein G(i) subunit alpha-1	Gnai1	31.1461	31.1304	30.9475	31.8112	31.6193	31.4699	31.5874	31.6004	31.62	23	14	14	64.1	40.4	40.4	40.361	0	323.31	15307000000	231	2.72387	0.00713775
246	B7ZNW3;B2RSR2;Q8BH47	B7ZNW3;B2RSR2;Q8BH47	Vesicle-trafficking protein SEC22a	Sec22a	23.0969	23.7431	24.3972	24.6072	24.1707	24.0211	22.0241	22.8736	22.9035	3	3	3	13	13	13	32.618	0	5.4188	86508000	11	1.7562	0.0388479
247	B2RSV4;Q921M3;Q921M3-2	B2RSV4;Q921M3;Q921M3-2	Splicing factor 3B subunit 3	Sf3b3	31.9136	31.9218	31.745	32.4653	32.7478	32.4228	30.7453	30.7703	30.5712	48	48	48	53.5	53.5	53.5	135.55	0	323.31	20761000000	531	5.11143	0.000161294
248	B2RSW8;Q9R0L6;Q9R0L6-2	B2RSW8;Q9R0L6;Q9R0L6-2	Pericentriolar material 1 protein	Pcm1	26.5969	26.5247	26.2441	26.301	25.77	26.3091	25.4622	25.5493	25.7915	8	8	8	4.6	4.6	4.6	228.83	0	6.8041	374940000	19	1.95877	0.0272131
249	B2RSY3;Q640R3	B2RSY3;Q640R3	Hepatocyte cell adhesion molecule	Hepacam	32.2934	32.5068	32.571	32.0736	32.0975	32.2643	32.9579	32.6852	32.9412	14	14	14	38.5	38.5	38.5	46.366	0	323.31	35490000000	452	2.7092	0.00732784
250	B2RT97;Q9WVJ2;E9Q5I9;F6ZQQ3;E9Q0U1;F6PXS6;E9PY93	B2RT97;Q9WVJ2;E9Q5I9	26S proteasome non-ATPase regulatory subunit 13	Psmd13	30.4972	30.6736	30.6651	30.2753	30.0672	30.2201	30.6673	30.6004	30.3207	25	25	25	68.4	68.4	68.4	42.809	0	259.79	7561000000	246	1.72069	0.041373
251	B2RTE3;Q4FK66;Q4FK66-2	B2RTE3;Q4FK66	Pre-mRNA-splicing factor 38A	Prpf38a	28.2624	27.7229	26.9385	29.0516	28.9544	29.0551	26.4111	26.8175	26.0257	11	11	11	28.5	28.5	28.5	37.436	0	41.299	1932000000	52	2.92352	0.00506256
252	Q3UEU2;B2RTJ8;O35710-2;O35710	Q3UEU2;B2RTJ8;O35710-2;O35710	Nocturnin	Ccrn4l	26.1175	26.5092	26.7205	25.9036	25.9295	26.1549	27.1264	27.0872	27.3318	8	8	8	27.5	27.5	27.5	48.27	0	21.562	495610000	34	2.90035	0.00524814
253	B2RTM0;P62806;Q61667;Q6B822	B2RTM0;P62806;Q61667	Histone H4	Hist2h4;Hist1h4a	37.822	37.5414	37.7822	37.9272	37.8404	38.2589	36.0975	35.6551	35.9367	19	19	19	71.8	71.8	71.8	11.367	0	323.31	1480000000000	6657	4.56354	0.00035552
254	B2RTN5;Q91YM2;Q3TSU7;Q3UVZ8;Q5U612	B2RTN5;Q91YM2;Q3TSU7	Rho GTPase-activating protein 35	Arhgap35	28.9845	29.4602	29.1988	29.0003	29.202	28.825	29.7899	29.7609	29.9091	37	37	37	34	34	34	170.39	0	104.22	3877600000	122	2.42101	0.0121773
255	B2RUE8;F8VPL5;B7ZNR9;E9PVG7;B7ZNR8;Q6ZQ68;P97820;Q3UTY9;K3W4N1;REV__Q8BKT3-2;G5E887;REV__Q8BKT3;Q8BRE0;Q80ST9-2	B2RUE8;F8VPL5;B7ZNR9;E9PVG7;B7ZNR8;Q6ZQ68;P97820	Mitogen-activated protein kinase kinase kinase kinase 4	Map4k4;mKIAA0687	29.83	29.6829	29.6421	29.1486	29.4713	29.442	30.028	30.1126	29.9589	35	35	20	33	33	23.7	139.06	0	272.33	5242300000	210	2.75603	0.00675302
256	B2RUG7;O88532;F6QJP7;F6V459;D3Z5G4;F6RTK9;D3Z7V6	B2RUG7;O88532	Zinc finger RNA-binding protein	Zfr	30.8244	30.7799	31.0121	31.298	31.4847	31.3427	29.2225	29.213	29.4775	40	40	40	54.1	54.1	54.1	114.45	0	323.31	10475000000	303	5.62743	7.99814e-05
257	B7ZNV9;E9Q4Z6;B2RUH8;Q8C008;Q5FWA4	B7ZNV9;E9Q4Z6;B2RUH8;Q8C008	Double zinc ribbon and ankyrin repeat-containing protein 1	Dzank1	27.7313	27.8316	28.1214	27.9022	27.9906	27.9965	27.0557	27.2699	27.1349	21	21	21	36.5	36.5	36.5	80.369	0	42.106	1067600000	66	3.22491	0.00304924
258	Q3UMS6;B2RUJ7;Q00519;Q99KV3;Q9CVF2;Q3TAT6;Q3TP30;Q9CW59;Q9ESH4;Q6V957;Q6V956;G3X982	Q3UMS6;B2RUJ7;Q00519	Xanthine dehydrogenase/oxidase;Xanthine dehydrogenase;Xanthine oxidase	Xdh	24.4548	25.2339	24.3072	25.8856	25.7827	25.9507	24.4551	24.6671	24.8513	7	7	5	7	7	5.7	146.5	0	5.0572	193350000	16	2.33135	0.0141049
259	S4R203;S4R248;B2RUJ8;S4R221;Q8C0D4;Q8R1F4;S4R1B0;S4R2V0;Q9CZD7	S4R203;S4R248;B2RUJ8;S4R221;Q8C0D4	Rho GTPase-activating protein 12	Arhgap12	26.8043	27.1263	27.6124	25.8274	25.9716	26.4765	28.3174	28.0076	27.4857	13	13	13	20.8	20.8	20.8	87.321	0	42.701	875570000	29	2.4647	0.0112942
260	B2RUM8;Q8K363;F6ZX28;Q9CSJ2;Q9CSG7	B2RUM8;Q8K363	ATP-dependent RNA helicase DDX18	Ddx18	26.1913	26.2346	26.3626	27.7011	26.6266	26.5653	25.3242	23.4032	22.431	7	7	7	16.5	16.5	16.5	74.18	0	11.295	293160000	12	1.9258	0.0289224
261	Q3V1L7;B2RV73;Q8VHI3;Q3UHF9	Q3V1L7;B2RV73;Q8VHI3;Q3UHF9	GDP-fucose protein O-fucosyltransferase 2	Pofut2	26.1258	26.2873	26.3213	27.2193	26.9321	26.9798	26.6676	26.7681	26.6374	7	7	7	22.1	22.1	22.1	49.387	0	41.445	650860000	41	3.36645	0.00243537
262	B2RVP5;Q3THW5;P0C0S6;Q8R029;Q3TFU6;Q3UA95;G3UWL7	B2RVP5;Q3THW5;P0C0S6;Q8R029;Q3TFU6;Q3UA95	Histone H2A;Histone H2A.V;Histone H2A.Z	H2afv;H2afz	33.041	31.9889	32.1558	32.8001	33.3186	33.513	32.1163	31.7425	31.9901	6	4	4	53.9	46.9	46.9	13.509	0	211.9	28949000000	163	1.63034	0.0484315
263	B2RW11;Q7TST1	B2RW11;Q7TST1		Ankrd34a	26.5345	26.8904	26.8401	25.9616	26.0425	26.2351	26.7366	27.0964	27.2204	8	8	8	25.1	25.1	25.1	52.45	0	56.963	446330000	27	2.50807	0.0104523
264	B2RW20;Q8C9H6;F6RUA3;Q8C9H6-3;E9QN41;Q8C9H6-4	B2RW20;Q8C9H6;F6RUA3;Q8C9H6-3;E9QN41;Q8C9H6-4	Striatin-interacting proteins 2	Strip2	28.2047	28.4524	28.4731	26.7189	26.9843	27.3575	28.7158	29.0521	29.0387	21	21	16	28.3	28.3	23.2	96.293	0	52.67	1653200000	71	3.83796	0.00112502
265	F8WIX8;Q149V4;B2RWH3;Q64523;Q6GSS7	F8WIX8;Q149V4;B2RWH3;Q64523;Q6GSS7	Histone H2A;Histone H2A type 2-C;Histone H2A type 2-A	Hist1h2al;Hist2h2ac;Hist2h2aa1	29.6893	29.6713	29.7452	30.616	30.2878	30.7092	28.0253	29.01	27.5449	8	3	2	62.4	37.6	14.4	13.607	0	123.36	6639300000	72	2.70307	0.00741516
266	B2RWU2;Q3UHF7	B2RWU2;Q3UHF7	Transcription factor HIVEP2	Hivep2	24.5863	25.0867	24.3361	26.4701	24.5391	25.2284	23.7706	23.1019	22.9568	6	6	5	3.7	3.7	3.3	266.73	0.0030577	2.2059	207030000	7	1.71528	0.0417395
267	B2RWW1;Q8C052	B2RWW1;Q8C052	Microtubule-associated protein 1S;MAP1S heavy chain;MAP1S light chain	Map1s	29.0316	29.3361	29.4172	28.6455	28.8881	28.6982	29.4483	29.4209	29.6324	26	26	26	41.1	41.1	41.1	103.02	0	76.585	3275300000	153	2.59602	0.00891679
268	E9QAH1;E9PVZ8;B2RWW2;Q571K1;Q8CGE5;Q6PAK0;B7ZNF9;Q80UY9;Q3UYL3	E9QAH1;E9PVZ8;B2RWW2;Q571K1		Golgb1	27.877	28.1486	27.4452	28.1582	27.8898	27.9217	26.7402	27.0474	27.2401	31	31	31	13.1	13.1	13.1	365.29	0	69.443	1195700000	66	2.07549	0.0221391
269	B2RWX1;B7ZCJ1;Q6DFV3;B7ZCJ0;G3UX38;A2BHQ2;F6WQR2	B2RWX1;B7ZCJ1;Q6DFV3;B7ZCJ0	Rho GTPase-activating protein 21	Arhgap21	29.3747	29.3548	29.5747	28.6963	28.5604	28.5364	30.143	30.087	29.9362	39	39	7	23.9	23.9	4.6	216.8	0	122.68	3494200000	161	5.062	0.000168905
270	B2RWY4;Q80VW5-4;Q80VW5-3;Q80VW5-2;Q80VW5;Q80VW5-11;Q80VW5-10;Q80VW5-12;Q80VW5-5;I7HNW6;Q80VW5-9;Q80VW5-8;Q80VW5-7;Q80VW5-6	B2RWY4;Q80VW5-4;Q80VW5-3;Q80VW5-2;Q80VW5;Q80VW5-11;Q80VW5-10;Q80VW5-12;Q80VW5-5	Whirlin	Whrn;Dfnb31	24.5201	24.8854	24.2962	23.2469	21.8189	23.8548	25.3161	24.6291	25.6668	4	4	4	7.3	7.3	7.3	96.556	0.00086331	3.4951	114710000	6	1.70943	0.0421244
271	B2RX00;Q9ESK9;Q8CHH8;F7CC56;E9PX56;Q6NZG0;E0CYY6;F6TLJ4;F7CCJ3;E0CZG6	B2RX00;Q9ESK9;Q8CHH8;F7CC56;E9PX56;Q6NZG0	RB1-inducible coiled-coil protein 1	Rb1cc1	26.9796	27.1748	26.7867	27.0615	26.447	25.8371	27.754	27.8754	27.6922	14	14	14	11.1	11.1	11.1	182.36	0	91.16	736690000	51	1.86012	0.0324361
272	B2RX01;Q8BSL0;Q571J5	B2RX01;Q8BSL0		Zkscan8	23.3421	24.473	23.9927	25.0374	25.441	24.8577	24.2192	23.9972	23.9502	4	4	3	10.3	10.3	7.4	58.376	0.00058377	3.7888	135390000	5	1.77625	0.0374886
273	G3UY21;B7ZNW9;G3UXV6;G3UZ88;G3UYX7;B2RX05;Q5DTL5;Q9R1B9;G3X909;G3UZ61;Q8BPJ0;G3UZW0	G3UY21;B7ZNW9;G3UXV6;G3UZ88;G3UYX7;B2RX05;Q5DTL5;Q9R1B9;G3X909	Slit homolog 2 protein;Slit homolog 2 protein N-product;Slit homolog 2 protein C-product	Slit2	26.544	26.5674	26.7394	23.7018	23.9933	23.8272	24.1348	23.3224	22.9083	6	6	6	5.7	5.7	5.7	169.28	0	7.6846	352590000	18	4.03599	0.000818666
274	G3X9Z4;B2RX07;Q69ZY3;A5HLW1;A5HLW0;F6UFZ5;Q8R2P5;Q8K0S1;Q3TT32;Q3TTQ0;Q99KH9;Q6PCW0	G3X9Z4;B2RX07;Q69ZY3;A5HLW1;A5HLW0;F6UFZ5		Pcf11	24.1438	24.7403	23.8305	26.3905	25.1456	26.1029	24.0139	23.1155	23.5753	7	7	7	5.9	5.9	5.9	172.72	0.00015161	4.6746	193240000	8	2.34531	0.0137989
275	Q3UGY4;Q3UGX2;B2RX08;E9Q397;P15508;Q5DTG9;Q149M1;Q8BWJ8	Q3UGY4;Q3UGX2;B2RX08;E9Q397;P15508	Spectrin beta chain, erythrocytic	Sptb	33.4523	33.466	33.5168	34.3549	34.306	34.2301	32.874	32.8238	32.8783	149	140	140	69.5	66.3	66.3	268.09	0	323.31	80349000000	1824	7.24522	1.43147e-05
276	D3Z1C4;B2RX33;Q8BWB6;D3YUM6	D3Z1C4;B2RX33;Q8BWB6;D3YUM6	Metalloreductase STEAP2	Steap2	27.3238	27.9537	27.8718	23.7837	24.5764	23.9522	27.7532	28.6445	28.4442	11	11	11	27.3	27.3	27.3	52.294	0	28.341	988010000	48	4.48177	0.000409637
277	B2RX66;Q5F2E8;Q3UUG1	B2RX66;Q5F2E8	Serine/threonine-protein kinase TAO1	Taok1	27.1939	26.8547	27.9528	26.6627	26.5787	26.8904	27.6884	28.147	28.108	21	17	16	24	17.7	16.4	116.05	0	32.953	1113300000	55	1.79842	0.0360666
278	B2RX77;Q9D483	B2RX77;Q9D483	DNA-directed RNA polymerase III subunit RPC3	Polr3c	25.2915	25.1295	25.5319	25.1088	25.5423	26.0287	23.7622	23.6425	22.4141	2	2	2	5.1	5.1	5.1	60.705	0	5.0783	205130000	8	2.50676	0.010473
279	B2RXA1	B2RXA1		Plcxd2	24.2761	23.3584	22.9544	23.4247	23.9515	23.1245	25.1013	25.0999	24.9888	3	3	3	10.6	10.6	10.6	38.617	0.00015211	4.751	99332000	9	2.03228	0.023954
280	B7ZWI2;B2RXM7;Q9D1J3	B7ZWI2;B2RXM7;Q9D1J3	SAP domain-containing ribonucleoprotein	1110005A23Rik;Sarnp	30.0762	30.085	30.1853	30.1163	30.0127	30.1809	27.7173	27.7809	27.6891	9	9	9	46.9	46.9	46.9	23.461	0	93.312	5021000000	80	7.91231	7.28245e-06
281	B7ZWM8;B2RXP1;Q8BVU0;E9QAU9;E9Q892;F6YZL6;F6TPH7;E9Q0H5;F6Y466	B7ZWM8;B2RXP1;Q8BVU0;E9QAU9;E9Q892	Leucine-rich repeat and calponin homology domain-containing protein 3	Lrch3	25.7416	25.7446	25.1924	25.8568	25.5218	25.0035	27.3744	26.931	26.8365	13	13	13	28.3	28.3	28.3	76.286	0	25.408	480180000	26	2.61365	0.00867873
282	B2RXW8;B2RXQ2;B8QI33;S4R1D4;Q3UJC0;S4R1I7	B2RXW8;B2RXQ2;B8QI33		Ppfia1	27.1963	27.4061	27.2499	26.8847	26.4102	26.6657	27.8165	27.9795	28.1193	23	12	11	21.3	12.2	11.8	140.13	0	70.988	1102100000	44	3.55324	0.00178131
283	B2RXQ6;Q8BNJ6;Q8BNJ6-2	B2RXQ6;Q8BNJ6;Q8BNJ6-2	Neuropilin and tolloid-like protein 2	Neto2	26.667	26.7308	25.7627	27.8681	27.477	27.6856	25.858	25.963	25.9827	13	13	13	30.9	30.9	30.9	58.662	0	19.494	754000000	41	2.75709	0.00674443
284	B2RXQ8;Q8BFQ4	B2RXQ8;Q8BFQ4	WD repeat-containing protein 82	Wdr82	29.7746	29.9803	29.5001	29.5467	30.0145	29.9171	28.8478	28.8298	28.6212	17	17	17	50.5	50.5	50.5	35.079	0	109.87	3725400000	122	2.83129	0.00589344
285	B2RXR2;Q8VD65;B2RY05	B2RXR2;Q8VD65;B2RY05	Phosphoinositide 3-kinase regulatory subunit 4	Pik3r4	29.2741	29.3135	29.1883	28.9346	29.3686	29.2465	29.9436	30.0581	29.697	28	28	28	28.9	28.9	28.9	152.57	0	142.25	3528100000	144	2.39121	0.0128037
286	B2RXS4;Q8CHG6;Q99LF0;Q8K2J5;REV__A2AKG8-3;REV__Q80T90;REV__E9PYJ6;REV__A2AKG8	B2RXS4;Q8CHG6	Plexin-B2	Plxnb2;mKIAA0315	30.7773	30.7629	31.0189	30.3829	30.6105	30.5744	31.301	31.3357	31.2539	55	54	53	38.9	38.5	38.1	206.23	0	323.31	10208000000	357	3.35434	0.00247851
287	B2RXT3;E9Q7L0	B2RXT3;E9Q7L0		Ogdhl	33.3134	33.2792	33.245	33.8428	33.7488	33.8227	33.4617	33.5575	33.4668	56	47	47	63.4	55	55	114.56	0	323.31	68088000000	1084	4.56026	0.000356093
288	E9PVY0;B2RXX8;D3YYN8;Q3UU96;H7BX44;Q3UU96-2;F6Q5A5;F6S5Z6;F6YZJ7;Q3TSA3;F6W0C2;Q05CL1;D6RI32;Q6DI71;E9Q6J9;P54265-4;P54265-6;P54265-5;P54265-7;P54265-10;P54265-2;P54265-3;P54265-9;P54265;P54265-8	E9PVY0;B2RXX8;D3YYN8;Q3UU96;H7BX44;Q3UU96-2;F6Q5A5;F6S5Z6;F6YZJ7	Non-specific serine/threonine protein kinase;Serine/threonine-protein kinase MRCK alpha	Cdc42bpa	30.5106	30.4639	30.6395	30.2245	30.2406	30.0885	30.8148	30.8898	30.9241	59	59	51	41.6	41.6	38.7	196.92	0	323.31	9445600000	297	3.93767	0.00095648
289	B2RXY7;P48758	B2RXY7;P48758	Carbonyl reductase [NADPH] 1	Cbr1	32.2962	31.9809	32.1441	31.555	31.7729	31.7029	32.1991	32.0217	32.027	21	21	20	75.5	75.5	72.6	30.641	0	323.31	21905000000	484	2.10585	0.0210856
290	B2RY56;S4R2B0;Q8BU35;S4R2A4;S4R2J1;S4R1X9;S4R2F7	B2RY56;S4R2B0	RNA-binding protein 25	Rbm25	28.7463	29.1006	28.2615	29.4491	29.7187	29.3225	27.3614	27.4153	26.9901	19	19	19	29.6	29.6	29.6	99.551	0	82.5	3010900000	111	3.54935	0.00179212
291	E9QMR2;B2RY79;B2RY08;F8VPN7;Q7TN11	E9QMR2;B2RY79;B2RY08;F8VPN7;Q7TN11		Dock9	30.9088	30.8428	30.8888	30.5079	30.5453	30.4551	31.3189	31.2558	31.2012	70	70	2	41.5	41.5	1.2	234.91	0	317.22	10497000000	454	5.44386	9.93949e-05
292	Q8CDS6;B2Z893;Q6GTL7;B2Z892;P70265;B2Z895;B2Z894;B2Z891;A7UAK4;Q8BVM1;A2AUP3;A7UAK6;Q9ESY2;A2AUP1;Q7TS91;A2AUP5;A2AUP4;A7UAK8;Q3U3S6;A7UAK5;Q8BX50;C9VZF3;C9VZF2;Q6DTY7-2;Q6DTY7-6;Q6DTY7-5;Q6DTY7;A2AFM9;P70266-2;P70266;Q3UU45	Q8CDS6;B2Z893;Q6GTL7;B2Z892;P70265;B2Z895;B2Z894	6-phosphofructo-2-kinase/fructose-2,6-bisphosphatase 2;6-phosphofructo-2-kinase;Fructose-2,6-bisphosphatase	Pfkfb2	26.7796	26.8541	26.6256	26.238	26.3255	26.0282	26.6106	26.9508	26.6206	14	14	10	31.7	31.7	24.3	54.662	0	16.687	605810000	42	2.08916	0.0216801
293	B3V097;B3V099;Q8BIQ5;A2AEK1;Q8BIQ5-2;A2AEJ8;A2AEK3;F6ZKC7	B3V097;B3V099;Q8BIQ5;A2AEK1;Q8BIQ5-2	Cleavage stimulation factor subunit 2	Cstf2	27.4371	27.9698	27.6527	27.3254	27.8943	27.9578	26.5357	26.6898	26.9078	13	13	9	33.8	33.8	23.8	66.424	0	66.082	1125100000	59	2.18427	0.0182704
294	B5TZD5;P58269-2;P58269;P58269-3;P58269-4;F7CL41;F7CPB1;F6T820	B5TZD5;P58269-2;P58269;P58269-3;P58269-4;F7CL41;F7CPB1	Zinc finger protein DPF3	Dpf3	28.5061	28.3385	28.7318	28.9464	29.1628	29.1514	21.6035	23.632	27.04	8	8	7	23	23	17.1	40.256	0	50.659	1528000000	35	1.79143	0.0365004
295	B6YY24;Q3UVG3	B6YY24;Q3UVG3	Protein FAM91A1	D15Ertd621e;Fam91a1	27.3272	27.6223	27.7452	27.1928	27.4311	27.1336	27.9163	28.0826	28.0261	16	16	16	22.7	22.7	22.7	93.462	0	45.132	932220000	48	2.44707	0.0116392
296	Q80UE5;Q80UE3;Q3UNQ6;B6ZHD0;O70318;Q7TPN6	Q80UE5;Q80UE3;Q3UNQ6;B6ZHD0;O70318	Band 4.1-like protein 2	Epb4.1l2;Epb41l2	28.7383	29.3276	29.4391	30.2982	30.0409	30.1188	28.2335	28.6057	28.4193	34	30	2	41	38.1	2.5	101.81	0	174.17	5527000000	146	3.31081	0.00264691
297	B7FAU9;Q8BTM8;B9EKP5;B7FAV1;Q6KAM8;Q3U7N9;F6XC15;Q4FZG4;J3JS91;I7HPX4;F6Z2C0;Q8BTM8-2;Q9JJ37;F7AVL7	B7FAU9;Q8BTM8;B9EKP5;B7FAV1;Q6KAM8	Filamin-A	Flna	31.8868	32.0271	32.2038	30.4212	30.5854	30.6171	32.7411	32.8466	32.8379	104	104	97	52.7	52.7	49.6	280.5	0	323.31	23903000000	623	6.01834	5.40977e-05
298	B7STB7;Q4FK88;Q4FJV4;Q3US43;P10107;Q3U5N9	B7STB7;Q4FK88;Q4FJV4;Q3US43;P10107;Q3U5N9	Annexin;Annexin A1	Anxa1	28.9967	28.3084	28.6159	23.4408	23.6433	22.7339	27.4877	26.6147	26.6495	9	7	7	31.8	28	28	38.75	0	28.015	2085500000	17	4.77709	0.000254937
299	B7U582;P17156;O88687	B7U582;P17156	Heat shock-related 70 kDa protein 2	Hspa2	30.2433	30.313	30.5268	29.2244	29.4135	29.5767	30.2537	30.3468	30.3012	37	21	19	58.6	40.3	37.3	69.723	0	176.9	5527200000	199	3.66201	0.00148336
300	Q9EQ79;Q8JZS4;Q3TJD3;B7XGA6;P09242;Q3TQ02;E9Q7P8;B1AXF5;B1AXF6	Q9EQ79;Q8JZS4;Q3TJD3;B7XGA6;P09242;Q3TQ02;E9Q7P8	Alkaline phosphatase;Alkaline phosphatase, tissue-nonspecific isozyme	Alpl	26.9436	26.8236	26.0451	23.1341	22.2542	23.603	25.489	25.2922	24.8547	6	6	6	16.2	16.2	16.2	57.483	0	19.196	184190000	18	3.36378	0.00244617
301	B7ZCU2;B7ZCU5;Q3TPY5;Q3TMI0;Q6AXD3;B7ZCU4;B7ZCU3;Q3TJR5;Q3TJ64;B7ZCU0;J3QNK8;Q8CBW3-5;Q8CBW3-2;Q8CBW3-4;Q8CBW3-3;Q8CBW3;Q3UAH6;Q3UBL3;Q3UVN6	B7ZCU2;B7ZCU5;Q3TPY5;Q3TMI0;Q6AXD3;B7ZCU4;B7ZCU3;Q3TJR5;Q3TJ64;B7ZCU0;J3QNK8;Q8CBW3-5;Q8CBW3-2;Q8CBW3-4;Q8CBW3-3;Q8CBW3;Q3UAH6	Abl interactor 1	Abi1	30.7034	30.4586	30.7486	30.359	30.552	30.1769	31.6781	31.2592	31.4449	21	21	15	47.1	47.1	37.4	43.174	0	169.89	11938000000	217	3.05874	0.00403232
302	B7ZMR0;Q76LS9-2;Q76LS9;Q76LS9-3	B7ZMR0;Q76LS9-2;Q76LS9	Protein FAM63A	Fam63a	29.118	29.0477	29.1938	28.4408	28.4669	28.8308	29.8298	30.0001	29.6962	9	8	8	26.3	24.4	24.4	51.225	0	101.93	4169500000	83	3.67786	0.0014498
303	B7ZMT1;Q8BWD8;G5E8L1;Q8BKC7;E0CYC4;Q8R3L8-3;Q8R3L8;Q8K2R6;E9Q6E2;E0CY29;E0CZC3	B7ZMT1;Q8BWD8;G5E8L1;Q8BKC7	Cyclin-dependent kinase 19	Cdk19	26.7217	26.8071	27.1082	27.3467	26.8823	26.581	24.93	25.4379	26.0042	14	13	13	35.9	34.7	34.7	56.569	0	15.644	556820000	37	2.19706	0.0178777
304	Q5S8D1;B7ZN95;C7TQ60;Q0PCR6;C7TQ59;C7TQ57;C7TQ58;C7TQ62;Q01815-2;Q01815;F8WJL1;F8WIW9;F8WGN0;F7C376;C7TQ61;Q01815-3;B1AVA5;B1AVA6;A3KPC9;Q3UQQ0;F7CNJ1;Q3UPG8;E9QPX8;E9Q7B5;F8VQE0;Q02789-2;Q02789	Q5S8D1;B7ZN95;C7TQ60;Q0PCR6;C7TQ59;C7TQ57;C7TQ58;C7TQ62;Q01815-2;Q01815;F8WJL1;F8WIW9;F8WGN0;F7C376;C7TQ61;Q01815-3	Voltage-dependent L-type calcium channel subunit alpha-1C	Cacna1c	25.0176	25.2614	25.9453	26.8758	26.9221	26.4378	25.1684	25.1546	24.119	12	12	7	7.8	7.8	5	240.14	0	15.994	328420000	19	2.20043	0.0177776
305	B7ZNA3;Q6GYP7;Q6GYP7-2;Q6GYP7-6;Q6GYP7-4;Q6GYP7-3;Q3U5E2	B7ZNA3;Q6GYP7;Q6GYP7-2;Q6GYP7-6	Ral GTPase-activating protein subunit alpha-1	Ralgapa1	28.936	29.0581	29.0862	29.109	28.7663	29.0703	29.4728	29.5503	29.5351	35	35	27	20.4	20.4	14.7	234.38	0	87.426	2427800000	134	2.56559	0.00945232
306	S4R1Q8;B7ZNH9;Q8K4S1	S4R1Q8;B7ZNH9;Q8K4S1	Phosphoinositide phospholipase C;1-phosphatidylinositol 4,5-bisphosphate phosphodiesterase epsilon-1	Plce1	24.4563	23.8885	23.6003	23.3346	23.2597	23.714	25.2765	25.4664	24.4011	8	8	8	5.4	5.4	5.4	256.45	0	8.3125	117510000	14	1.96714	0.0268461
307	B7ZW94;Q8C3F2;Q8C3F2-3;Q3V3X9;Q8C3F2-2	B7ZW94;Q8C3F2;Q8C3F2-3;Q3V3X9	Constitutive coactivator of PPAR-gamma-like protein 2	Fam120c	30.3772	30.3269	30.3187	30.583	30.2959	30.4539	29.6554	29.6829	29.7782	35	33	33	43.8	41.8	41.8	119.66	0	188.46	5608300000	241	3.87592	0.00105713
308	Q545R3;B7ZWC0;Q62433;Q3TSR4;Q3TD08;E9Q514;E9Q5I8;E9Q3F9;E9PVF3;F6VLR8;E9Q0J8;E9PZC7;E9Q7G8;E9Q147;E9Q7V2	Q545R3;B7ZWC0;Q62433;Q3TSR4;Q3TD08	Protein NDRG1	Ndrg1	29.28	29.1745	28.5701	30.9771	31.0278	30.8027	26.8266	26.6313	24.7035	15	15	15	68.8	68.8	68.8	43.008	0	316.76	5783300000	104	3.32124	0.00261003
309	B7ZWC4;Q07113;B9EKB8;Q8C2F9;Q8K0J1;Q80VF2;Q8C6V9;Q7TMR1	B7ZWC4;Q07113;B9EKB8;Q8C2F9	Cation-independent mannose-6-phosphate receptor	Igf2r	28.1275	27.6961	28.2882	28.2273	28.0602	27.9047	26.1021	26.2311	25.9872	22	22	22	11.5	11.5	11.5	273.86	0	34.088	883550000	38	4.39001	0.000473649
310	B9EKE9;B7ZWF1;Q3TQX5;Q62167;B9EIA2;P16381;Q3V086;Q61496	B9EKE9;B7ZWF1;Q3TQX5;Q62167;B9EIA2;P16381	ATP-dependent RNA helicase DDX3X;Putative ATP-dependent RNA helicase Pl10	Ddx3x;D1Pas1	30.2469	29.9944	30.7954	30.7027	30.699	30.8003	29.7545	29.3741	30.0709	37	8	8	60.2	18.5	18.5	73.013	0	252.2	7312900000	136	1.67231	0.0449786
311	E9Q0B0;B7ZWM6;Q3UTJ2;B9EKP8;Q3UTJ2-2;Z4YJR7;Q3UTJ2-4;D3Z080;Q3UTJ2-5;B2RXQ9;Q3UTJ2-3;Q3UTJ2-6;Q3UTJ2-7;F6ZWT0;F6V513;F7BEU1;D3Z203;D3YY43;D3Z4W6;D3YTN2;D3YUT0	E9Q0B0;B7ZWM6;Q3UTJ2;B9EKP8;Q3UTJ2-2;Z4YJR7;Q3UTJ2-4;D3Z080;Q3UTJ2-5;B2RXQ9;Q3UTJ2-3	Sorbin and SH3 domain-containing protein 2	Sorbs2	28.1881	28.5858	28.6683	27.606	27.6287	27.585	28.7637	28.846	28.7009	20	19	19	20.4	19.5	19.5	134.27	0	39.64	1744600000	74	3.64062	0.00154219
312	B8QI34;Q5DTM9;Q8BSS9	B8QI34;Q5DTM9;Q8BSS9	Liprin-alpha-2	Ppfia2	28.6623	28.7402	28.3578	28.0094	27.8116	27.7011	28.9907	28.885	29.0092	35	24	21	32.1	22.5	19.9	143.33	0	94.939	2614200000	125	3.52952	0.00184189
313	B8QI35;C7G3P1;P60469;F6UYF1;Q9CWF5	B8QI35;C7G3P1;P60469;F6UYF1	Liprin-alpha-3	Ppfia3	30.8547	30.6974	30.4485	29.9164	29.8331	29.6066	31.3342	31.1158	31.1635	45	45	39	46.2	46.2	41.9	133.42	0	322.23	9171800000	306	3.90625	0.00100163
314	B8QI36;Q69ZW5	B8QI36;Q69ZW5		Ppfia4	30.1594	30.0097	30.2312	29.7701	29.5599	29.5469	30.8121	30.8105	30.7965	36	34	26	39.8	38.2	30.5	133.71	0	306.58	7523800000	272	4.73501	0.000271384
315	F6QYE1;B9EHC7;O09161;E9PZ67	F6QYE1;B9EHC7;O09161;E9PZ67	Calsequestrin;Calsequestrin-2	Casq2	26.2455	25.63	25.3464	25.6585	24.8087	24.1969	28.1763	27.6941	28.0192	8	8	8	22.7	22.7	22.7	48.435	0	29.818	676390000	35	3.04216	0.00414836
316	B9EHI9;Q3UZV7-2;Q3UZV7;Q3UZV7-3;E9PUJ3;Q3UZV7-5;Q8K107;Q3UZV7-7;Q3UZV7-6	B9EHI9;Q3UZV7-2;Q3UZV7;Q3UZV7-3;E9PUJ3	UPF0577 protein KIAA1324-like homolog	9330182L06Rik	26.0043	25.9081	26.3256	26.7521	26.4414	26.6169	25.2486	25.3526	25.1476	14	13	11	20.6	20	17	113.66	0	19.574	420380000	29	3.76077	0.00127733
317	B9EHN0;Q02053;P31254;Q61341	B9EHN0;Q02053	Ubiquitin-like modifier-activating enzyme 1	Uba1	34.2759	34.5493	34.5152	34.0868	34.0917	34.1541	34.0706	34.1099	34.1619	52	52	52	65.7	65.7	65.7	117.81	0	323.31	122470000000	1947	2.1849	0.0182517
318	B9EHZ5;Q9JLB0-2;Q6NSS8;Q811G2;Q8BP37;E9Q2R8;REV__Q8C6L5;REV__Q8BNZ9	B9EHZ5;Q9JLB0-2;Q6NSS8;Q811G2	MAGUK p55 subfamily member 6	Mpp6	31.2053	31.212	31.0797	29.9869	29.9498	29.8804	31.9563	32.0662	31.9887	35	33	1	66	63.6	2	60.924	0	225.65	14584000000	342	7.33303	1.68916e-05
319	B9EI57;Q8CH25-2;Q8CH25;Q9CS69	B9EI57;Q8CH25-2;Q8CH25	SAFB-like transcription modulator	Sltm	29.5406	29.6754	29.3438	30.0085	30.4283	30.2499	28.3249	28.1273	28.27	20	20	20	21.5	21.5	21.5	116.92	0	301.58	3984200000	126	4.73501	0.000270776
320	B9EIC7;Q8K0S0;E0CXJ1	B9EIC7;Q8K0S0	Phytanoyl-CoA hydroxylase-interacting protein	Phyhip	32.6377	32.7905	32.4203	32.1612	32.2657	32.4895	32.8036	32.9516	32.8888	17	13	13	56.4	47	47	37.554	0	323.31	35814000000	567	2.00285	0.0252651
321	B9EIE8;Q9DA03;D6RD13	B9EIE8;Q9DA03	Complex III assembly factor LYRM7	Lyrm7	27.3307	26.5848	26.6374	26.8294	26.9619	26.9296	26.1582	26.0698	26.0949	4	4	4	39.1	39.1	39.1	14.85	0	14.316	614320000	29	1.905	0.0300503
322	D3YUW8;D3YUX1;Q0VGT3;B9EIG6;Q8BZH4;Q3TSQ2	D3YUW8;D3YUX1;Q0VGT3;B9EIG6;Q8BZH4;Q3TSQ2	Pogo transposable element with ZNF domain	Pogz	28.8374	28.5989	28.5441	29.9083	29.4936	29.8418	27.0611	25.9945	27.4474	34	34	34	36.5	36.5	36.5	144.86	0	136.14	2650000000	99	3.14269	0.00350137
323	Q8C7Z5;Q56VN0;B9EIV1;Q499F6;Q9JM63	Q8C7Z5;Q56VN0;B9EIV1;Q499F6;Q9JM63	ATP-sensitive inward rectifier potassium channel 10	Kcnj10	30.5264	30.4845	30.7049	29.62	30.1833	30.2214	31.6102	31.4079	31.4455	15	15	15	32.2	32.2	32.2	42.459	0	323.31	8836500000	164	3.3483	0.0025025
324	B9EIW5;Q6DFV7;Q8CG81;A9Q6S9;Q6DFV7-3;Q6DFV7-6;Q6DFV7-5;Q6DFV7-4;Q6DFV7-2	B9EIW5;Q6DFV7;Q8CG81	Nuclear receptor coactivator 7	Ncoa7	25.8164	25.5445	25.0125	25.3726	25.4695	25.2284	27.3917	26.7995	26.557	9	9	9	12.7	12.7	12.7	105.01	0	5.6512	337310000	15	2.57828	0.00921922
325	B9EJ15;Q8C5W0-4;Q8C5W0;Q05D14;Q8C5W0-2;Q8C5W0-3;Q3UGS6;Q571C8	B9EJ15;Q8C5W0-4;Q8C5W0;Q05D14;Q8C5W0-2;Q8C5W0-3;Q3UGS6	Calmin	Clmn	29.487	29.4014	29.5225	27.724	28.0278	27.679	29.9557	30.191	30.0192	24	24	24	29.5	29.5	29.5	117.19	0	148.25	3695300000	160	5.63228	7.99206e-05
326	B9EJ29;Q80UG2	B9EJ29;Q80UG2	Plexin-A4	Plxna4	28.8893	28.9978	29.1902	29.0905	29.0228	29.0968	29.6422	29.7057	29.7308	42	34	31	28.1	24	22.3	212.23	0	102.39	3532200000	164	3.65029	0.00151291
327	B9EJ54;Q6ZQG1;Q6PDG0;Q6P9L5;Q6P9Y6;Q9D6C1;Q3UFI7;E9Q880;Q80VE6;B0LAE1	B9EJ54;Q6ZQG1;Q6PDG0;Q6P9L5		Nup205	32.5611	32.5698	32.3439	33.5979	33.3477	33.346	31.4742	31.4316	31.3169	67	67	67	44.4	44.4	44.4	227.46	0	323.31	50395000000	315	5.55137	9.01522e-05
328	B9EJ96;Q9D0J3;D3Z1X5	B9EJ96		Arhgap26	30.8921	30.7694	30.8222	29.8635	29.4541	29.4537	31.6372	31.7221	31.5309	29	29	0	41.8	41.8	0	82.238	0	182.58	11768000000	318	5.01581	0.000178304
329	R7RU63;R7RVD4;B9EJA2-2;B9EJA2-3;B9EJA2-5;B9EJA2-4;B9EJA2;D3Z1E3;F6Q1W8;D3Z551	R7RU63;R7RVD4;B9EJA2-2;B9EJA2-3;B9EJA2-5;B9EJA2-4;B9EJA2	Cortactin-binding protein 2	Cttnbp2	29.3989	29.3676	29.3805	27.657	27.8474	28.0511	30.4391	30.1416	30.4257	26	26	26	48.1	48.1	48.1	67.548	0	323.31	4365300000	145	5.55307	9.0243e-05
330	B9EK90;Q8VDU5;D3Z1F6;D3YXV4;A0AUN3;D3Z3V0;D3YVW4;REV__Q62232	B9EK90;Q8VDU5;D3Z1F6	SNF-related serine/threonine-protein kinase	Snrk	27.9934	28.292	27.7488	27.9279	28.1115	28.024	28.6413	28.5532	28.7316	19	19	18	31.1	31.1	30.2	81.934	0	45.379	1695500000	63	2.18096	0.0183788
331	E9Q390;B9EK95;Q69ZN7;Q69ZN7-4;Q69ZN7-2;Q69ZN7-3	E9Q390;B9EK95;Q69ZN7;Q69ZN7-4;Q69ZN7-2	Myoferlin	Myof	27.4416	27.8497	28.3795	23.6908	26.4147	24.2479	27.3571	27.5802	27.1714	13	13	13	8.6	8.6	8.6	233.32	0	15.862	449770000	19	1.97586	0.0264732
332	Q3UHL7;E9QN70;B9EKB0;P02469;Q9CRX6;Q8K271;Q3UR38;Q0V927;E9PYT5;Q3TNZ8	Q3UHL7;E9QN70;B9EKB0;P02469;Q9CRX6;Q8K271	Laminin subunit beta-1	Lamb1	28.8945	29.0147	29.023	28.3916	28.391	28.7359	28.7171	28.5377	28.7152	27	27	27	18.2	18.2	18.2	202.44	0	93.27	2539500000	101	1.85084	0.0329711
333	B9EKB3;Q8BZZ3;Q3UV52;Q05CE4;Q7TMG3;Q9CT73	B9EKB3;Q8BZZ3;Q3UV52;Q05CE4	E3 ubiquitin-protein ligase;NEDD4-like E3 ubiquitin-protein ligase WWP1	Wwp1	27.2175	27.3036	27.5568	26.9732	27.2686	27.0061	28.224	28.2292	28.2294	13	10	10	18.8	15.7	15.7	104.71	0	35.911	1025500000	49	3.88222	0.00104828
334	Q3TZN9;E9Q236;B9EKC2;E9Q467;B7ZWC5	Q3TZN9;E9Q236;B9EKC2;E9Q467;B7ZWC5		Abcc4	26.4547	26.4827	26.4462	25.6554	25.7125	26.0505	26.337	25.8525	25.9443	10	10	10	8.8	8.8	8.8	148.83	0	11.243	369850000	31	1.78649	0.0368416
335	E9PYT0;B9EKC3;P97393	E9PYT0;B9EKC3;P97393	Rho GTPase-activating protein 5	Arhgap5	29.9044	29.8902	29.9306	29.2856	29.4341	29.1622	30.805	30.6766	30.5313	46	46	46	36.9	36.9	36.9	172.47	0	185.38	6177100000	259	4.76819	0.000259008
336	B9EKI5;Q3TTA7;Q3TTA7-2	B9EKI5;Q3TTA7;Q3TTA7-2	E3 ubiquitin-protein ligase CBL-B	Cblb	22.2214	23.2343	23.1325	23.8077	23.37	23.8042	24.9667	25.0733	25.373	4	4	4	5.5	5.5	5.5	104.59	0.0021786	2.5184	136510000	5	3.06887	0.00397588
337	B9EKJ3;Q80TL7-2;Q80TL7;Q3TTT0;Q5XK24	B9EKJ3;Q80TL7-2;Q80TL7	Protein MON2 homolog	Mon2	29.6786	29.8307	29.8381	29.2215	29.1172	28.7222	29.9998	29.8348	29.7677	44	44	44	32.9	32.9	32.9	188.35	0	177.62	4448400000	246	2.72801	0.0071069
338	B9EKL6;Q63739	B9EKL6;Q63739	Protein tyrosine phosphatase type IVA 1	Ptp4a1	29.2933	28.924	28.9366	28.511	27.7667	28.0705	29.2014	29.334	29.0368	10	10	7	57.2	57.2	48	19.815	0	41.479	2824800000	94	2.32769	0.0142044
339	B9EKR1;B2RXS8;Q9WUT8;Q8C4M8;Q810U6;Q8BJY4;Q99LN6;Q3US98	B9EKR1;B2RXS8;Q9WUT8	Receptor-type tyrosine-protein phosphatase zeta;Protein-tyrosine-phosphatase	Ptprz1	32.4185	32.4193	32.5098	32.4147	32.5482	32.4973	32.713	32.7095	32.8787	41	41	41	19.6	19.6	19.6	254.4	0	323.31	36637000000	562	2.42646	0.0120786
340	Q543Z1;B9UIT4;P21836;Q78ED5	Q543Z1;B9UIT4;P21836	Carboxylic ester hydrolase;Acetylcholinesterase	Ache	27.0952	26.5204	26.0931	27.3438	28.1591	28.4436	24.8712	24.663	25.298	12	12	12	33.4	33.4	33.4	68.168	0	78.641	754760000	40	3.14123	0.0035054
341	E3VRY9;C3VLD3;E3VRY5;J3QN27;J3QMT8;E3VRY8;E3VRZ0;Q08460-2;F7BHL0;F6ZSN2;E3VRZ1;Q08460-5;Q08460;E3VS02;E3VS01;E3VS00;E3VRZ4;E3VRZ3;E3VRY7;E3VRZ6;E3VRY4;E3VRZ2;E3VRZ7;Q08460-3;Q08460-4;J3QP84;F6V0P5;F6XW53;E3VS04;E3VRZ5;E3VRY6;F6WSZ3;E3VS03;E3VRZ9;E3VRZ8;E9Q9P4;Q3UQ23;Q3TSL8;Q3UXG3;A5JHE0	E3VRY9;C3VLD3;E3VRY5;J3QN27;J3QMT8;E3VRY8;E3VRZ0;Q08460-2;F7BHL0;F6ZSN2;E3VRZ1;Q08460-5;Q08460;E3VS02;E3VS01;E3VS00;E3VRZ4;E3VRZ3;E3VRY7;E3VRZ6;E3VRY4;E3VRZ2;E3VRZ7;Q08460-3;Q08460-4;J3QP84;F6V0P5;F6XW53;E3VS04;E3VRZ5;E3VRY6;F6WSZ3;E3VS03;E3VRZ9;E3VRZ8;E9Q9P4	Calcium-activated potassium channel subunit alpha-1	Kcnma1	28.7305	28.6684	28.8592	28.0259	27.7309	27.6308	29.4739	29.4295	29.601	22	22	22	22.2	22.2	22.2	134.11	0	145.26	2811000000	104	4.73203	0.000272025
342	Q9D517;C4B4E7;Q3TXT9;D3YUW0;D3Z1M6;D3YV65;D3YTN7	Q9D517;C4B4E7;Q3TXT9	1-acyl-sn-glycerol-3-phosphate acyltransferase gamma	Agpat3	30.7054	30.5646	30.7057	30.5076	30.343	30.5795	31.0018	30.994	30.9619	19	19	19	39.1	39.1	39.1	43.295	0	96.959	9369700000	259	3.02248	0.00428087
343	C7IVS7;Q32MF3;Q8CC27-4;Q8CC27-2;Q8CC27-3;Q8CC27;A2ASJ7;C7TQ54;C7TQ55;F6S5Y2;C7TQ56	C7IVS7;Q32MF3;Q8CC27-4;Q8CC27-2;Q8CC27-3;Q8CC27	Voltage-dependent L-type calcium channel subunit beta-2	Cacnb2	25.8216	26.0244	26.0261	24.8086	24.584	24.2518	26.3213	26.8453	26.7727	11	6	6	21.2	13.2	13.2	68.06	0	12.618	340390000	12	3.95718	0.000927386
344	Q6P9M2;Q7TNB5;C9K0Y4;Q9CUV0	Q6P9M2;Q7TNB5;C9K0Y4		Gria1	31.9247	31.9953	31.7279	29.9331	29.5289	29.2513	32.8953	33.009	32.8998	36	30	1	42.5	35.9	1	101.46	0	323.31	20972000000	397	5.41939	0.000102985
345	C9K0Y5	C9K0Y5		Gria3	30.266	30.5665	30.7622	29.0722	29.0505	28.9758	31.4865	31.5197	31.7283	32	24	1	41.2	31.6	1.6	100.3	0	323.31	8888900000	243	5.35022	0.000115515
346	C9K0Y7;E9PX01;Q8C069;C9K0Y9;Q8BXG8	C9K0Y7		Gria4	31.5542	31.658	31.5722	31.0987	30.8823	30.9811	32.5613	32.346	32.478	35	27	0	42.1	32.4	0	100.75	0	323.31	23680000000	475	5.39651	0.000106359
347	C9K0Z8;O88703;P01642	C9K0Z8;O88703	Potassium/sodium hyperpolarization-activated cyclic nucleotide-gated channel 2	Hcn2	29.598	29.6586	29.3913	30.8052	30.8544	30.7568	28.9661	28.9319	28.8096	26	26	20	37.3	37.3	30.5	94.711	0	226.86	5849000000	188	5.98103	5.42717e-05
348	D0EM45;Q9JKL5;D0EM46;D0EM47	D0EM45;Q9JKL5;D0EM46;D0EM47	Calcineurin B homologous protein 3	Tesc	26.9734	27.2234	26.875	26.9283	26.8471	26.4289	27.3511	27.7262	27.5188	7	7	7	35	35	35	24.599	0	26.704	1027300000	36	1.96142	0.0270783
349	F7AAP4;D1FNM8;H2BL43;E9Q828;Q32ME1;Q6Q477;D1FNM9;Q3UPA8;Q6Q476	F7AAP4;D1FNM8;H2BL43;E9Q828;Q32ME1;Q6Q477;D1FNM9	Calcium-transporting ATPase	Atp2b4	30.7323	30.9898	30.9697	30.4789	30.4698	30.221	31.1657	31.2381	31.2463	49	29	28	40.5	25.6	25.1	128.56	0	287.88	12069000000	312	3.33002	0.00256849
350	D2KHZ9;P16858;S4R257;Q3TUZ9;D3Z0Z9;Q4VBD1;Q6IWE3;S4R1W8;W8QM43;S4R1N5;Q8CEV2;V9GX06;Q3V2I5;S4R2G5;Q64467;Q2VWQ4;V9GXA7;V9GXK0;Q8BJ40	D2KHZ9;P16858;S4R257;Q3TUZ9	Glyceraldehyde-3-phosphate dehydrogenase	GAPDH;Gapdh;Gm10481	37.1556	37.1554	37.2343	36.8472	36.7834	36.7771	36.9986	36.8778	37.0742	30	30	1	84.7	84.7	6	35.81	0	323.31	664700000000	6226	2.87185	0.00550232
351	D3YTP3	D3YTP3		Mtx3	29.0208	28.9851	29.1525	29.7966	29.5135	29.6591	29.5451	29.2959	29.1073	15	15	15	48.1	48.1	48.1	34.89	0	77.14	5170700000	141	1.99218	0.0257034
352	D3YTQ3;F6VQH5;F6ZKM7	D3YTQ3;F6VQH5		Hnrnpdl	30.5897	30.3084	30.3608	31.4549	31.4608	31.2908	28.813	28.8823	29.3744	18	17	3	38.3	38.3	12.1	46.27	0	167.09	9929500000	170	4.63928	0.000315565
353	D3YTS3;Q68FD9;F7ATU7	D3YTS3;Q68FD9;F7ATU7	UPF0606 protein KIAA1549	D630045J12Rik;Kiaa1549	25.8251	25.767	26.0545	25.9913	26.4904	26.7102	27.5191	26.7782	26.723	11	11	11	8.2	8.2	8.2	179.21	0	30.691	522750000	33	1.69302	0.0433462
354	D3YTU2;Q3U0K8-3;Q3U0K8;Q3U0K8-2	D3YTU2;Q3U0K8-3;Q3U0K8;Q3U0K8-2	Prolyl 3-hydroxylase OGFOD1	Ogfod1	25.9086	24.9403	24.7046	25.2605	26.4568	26.3165	24.0379	23.6211	24.3517	5	5	5	19.6	19.6	19.6	61.159	0	61.494	164400000	16	1.85476	0.0327331
355	D3YTW7;D3YVT9;D3Z4S7;D3Z5M6;Q80TS3-5;Q80TS3;Q80TS3-3;D3Z6H9;D3Z3X6;D3Z6H7;D3Z634;D3Z593;D3Z3G4;K3W4M8;Q80TS3-2;D3YU23;D3Z6J2;D3YWR3;D3Z4V0;D3YWB1;Q80TS3-4;F6WMY5;Q80TS3-6	D3YTW7;D3YVT9;D3Z4S7;D3Z5M6;Q80TS3-5;Q80TS3;Q80TS3-3;D3Z6H9;D3Z3X6;D3Z6H7;D3Z634;D3Z593;D3Z3G4;K3W4M8;Q80TS3-2;D3YU23;D3Z6J2;D3YWR3;D3Z4V0;D3YWB1;Q80TS3-4	Latrophilin-3	Adgrl3;Lphn3	28.8942	29.0216	29.1837	27.7718	27.8888	27.9766	30.0296	30.1082	29.844	27	26	26	24.3	23.9	23.9	170.7	0	134.57	3415500000	140	5.50239	9.61997e-05
356	D3YTZ7;Q9CR30;D6RDE6;Q8VCY7	D3YTZ7;Q9CR30;D6RDE6;Q8VCY7	Josephin-2	Josd2	24.9218	24.2477	24.9915	25.9726	25.6805	25.4714	23.3009	23.389	22.5564	4	4	4	39	39	39	16.119	0.00058123	3.7132	123380000	7	3.33773	0.00253395
357	D3YU12;Q8K2T1;G5E8S7;Q8K2T1-2;Q8K2T1-3	D3YU12;Q8K2T1;G5E8S7;Q8K2T1-2	NmrA-like family domain-containing protein 1	Nmral1	27.8897	28.1932	28.2259	28.8704	29.241	28.8688	28.1199	28.0257	27.8086	13	13	13	45.2	45.2	45.2	33.081	0	108.33	2625400000	96	2.94917	0.00486372
358	Q6P6L5;D3YU50;F6RQD1;G0YZM8;F7D574	Q6P6L5;D3YU50;F6RQD1		Mybpc1	25.9606	26.6046	25.522	24.8697	25.1284	23.4406	27.7804	28.4659	27.8414	14	14	13	13.1	13.1	12.1	126.2	0	21.77	715480000	20	2.78831	0.00635152
359	E9QP59;D3YU56;Q9WU40;Q9WU40-2	E9QP59;D3YU56;Q9WU40;Q9WU40-2	Inner nuclear membrane protein Man1	Lemd3	28.3724	28.3144	29.2559	29.7394	29.5516	29.8185	27.8328	27.6609	28.0932	33	33	33	48.3	48.3	48.3	100.16	0	187.61	3083700000	126	2.77735	0.00648286
360	D3YU59;Q3UH68;D3YU22;D3Z589;Q3UH68-3;Q3UH68-2;Q8CGB7;D3YV55;F6X3N8;F6W1Y9;D6RHT2	D3YU59;Q3UH68;D3YU22;D3Z589;Q3UH68-3;Q3UH68-2;Q8CGB7	LIM and calponin homology domains-containing protein 1	Limch1	27.9782	27.9179	27.7998	27.9564	28.0153	28.0997	28.1946	28.5607	28.3668	25	25	25	31.5	31.5	31.5	120.99	0	84.568	1944600000	92	2.06472	0.0225768
361	D3YUD3;D3Z230;D3YTM1;Q9EPW0	D3YUD3;D3Z230;D3YTM1;Q9EPW0	Type I inositol 3,4-bisphosphate 4-phosphatase	Inpp4a	31.8089	31.8057	31.7252	30.7875	30.6475	30.6568	32.4504	32.4461	32.4717	44	44	0	54.3	54.3	0	105.57	0	323.31	21127000000	602	7.32618	1.54442e-05
362	D3YUH8;Q6IFT4;Q6IFT4-2	D3YUH8;Q6IFT4	Rho GTPase-activating protein 20	Arhgap20	26.2851	25.5885	25.8016	24.1283	23.7899	24.1449	26.6217	26.9783	26.5879	10	10	10	12.7	12.7	12.7	127.76	0	16.453	383110000	23	4.33747	0.000504968
363	D3YUM1;Q91YT0;D3Z1U9;D3Z0K1;D6RG60;D3YXX5	D3YUM1;Q91YT0;D3Z1U9	NADH dehydrogenase [ubiquinone] flavoprotein 1, mitochondrial	Ndufv1	33.7875	33.8661	33.7965	34.1322	34.0201	34.1422	33.6376	33.574	33.5838	35	35	35	79.1	79.1	79.1	49.913	0	323.31	107620000000	1236	4.23002	0.000597585
364	D3YUP0;Q0P5W1;F8WI64;Q0P5W1-2;Q0P5W1-3;Q8CIG5;F6ZLN8;D3Z5P1;D3YU67	D3YUP0;Q0P5W1;F8WI64;Q0P5W1-2;Q0P5W1-3;Q8CIG5;F6ZLN8	Vacuolar protein sorting-associated protein 8 homolog	Vps8	27.6077	27.5347	27.7854	27.1765	27.6806	27.5443	28.0147	28.1346	28.0703	28	28	28	25.1	25.1	25.1	161.33	0	48.674	1147100000	74	1.90276	0.0301391
365	D3YUS5;E9PYD8;E9PW37;Q0VAV5;Q8BU92;Q3TPW3;D3Z7S1;D3Z1T6;D3YWZ9	D3YUS5;E9PYD8;E9PW37;Q0VAV5		Rasal2	27.1143	27.3622	27.3629	26.681	26.5707	26.5043	27.4234	27.2278	27.837	16	11	11	16.9	12.9	12.9	142.01	0	16.197	558130000	35	2.42308	0.0121372
366	D3YV13;Q80V91;E9Q3J1;Q3UFK3;D3Z4X6	D3YV13;Q80V91;E9Q3J1;Q3UFK3	Probable E3 ubiquitin-protein ligase DTX3	Dtx3	26.8105	27.2764	27.2775	26.1375	26.7832	26.8488	27.5944	27.5157	27.6155	12	12	12	45.7	45.7	45.7	38.149	0	28.187	897970000	52	1.86217	0.0322949
367	D3YV16;Q0PD24;Q923S9	D3YV16;Q0PD24;Q923S9	Ras-related protein Rab-30	Rab30	28.3746	28.7428	27.9505	28.1139	28.3497	27.824	29.5479	29.664	29.3337	10	10	10	63.4	63.4	63.4	20.13	0	59.333	2256500000	61	2.66431	0.00791727
368	D3YVU9;Q8JZS7;V9GWZ9;V9GXD2;Q3TPS7	D3YVU9;Q8JZS7;V9GWZ9	3-hydroxymethyl-3-methylglutaryl-CoA lyase, cytoplasmic	Hmgcll1	24.4005	23.2662	24.9337	23.5667	22.9917	23.2901	25.5278	25.126	24.8134	6	5	5	24.4	22.2	22.2	33.015	0.0024311	2.4286	127570000	11	1.74289	0.0396543
369	D3YVV7;G3UYX3	D3YVV7;G3UYX3		Nova2	28.8031	28.4885	28.97	29.0359	28.5262	28.4354	27.5286	27.0621	27.248	15	11	11	44.9	35.4	35.4	49.066	0	72.655	2336000000	85	3.04329	0.00414047
370	D3YW52;Q61838;D3YUI3	D3YW52;Q61838	Alpha-2-macroglobulin;Alpha-2-macroglobulin 165 kDa subunit;Alpha-2-macroglobulin 35 kDa subunit	Pzp;A2m	29.9282	30.192	30.298	29.5733	29.9355	29.8242	28.97	28.8484	29.2674	40	40	39	36.6	36.6	36.1	167.28	0	164.06	4607200000	164	2.89412	0.00530371
371	D3YWB9;Q69ZB1;Q99P47;Q8BPP6;Q3URC6;E9PY62	D3YWB9;Q69ZB1;Q99P47;Q8BPP6	Contactin-associated protein-like 4	Cntnap4	28.3746	28.4947	28.4155	28.4997	28.6799	28.6109	29.0509	28.9243	28.6596	30	30	29	30.5	30.5	29.9	144.76	0	80.76	2533700000	101	1.80281	0.0357658
372	D3YWH4;D3Z6X7;Q9DBU0;D6RGM8;D3Z279;D3YYW1	D3YWH4;D3Z6X7;Q9DBU0;D6RGM8;D3Z279	Transmembrane 9 superfamily member 1	Tm9sf1	25.45	25.4872	26.0735	25.5397	25.5364	26.1092	24.7033	24.5717	25.04	6	6	6	17.4	17.4	17.4	54.87	0	9.0446	194400000	15	1.80047	0.0359096
373	D3YWJ9;Q69Z89-2;Q69Z89-5;Q69Z89;Q69Z89-3;Q69Z89-4;D3YYI1	D3YWJ9;Q69Z89-2;Q69Z89-5;Q69Z89;Q69Z89-3;Q69Z89-4	Ras-associating and dilute domain-containing protein	Radil	26.7473	27.0077	27.1192	26.801	26.9207	27.0678	24.9719	25.3392	25.6783	12	12	12	15.6	15.6	15.6	119.67	0	23.443	561090000	34	3.57515	0.00172218
374	D3YWP2;Q810B2;Q9Z123	D3YWP2;Q810B2;Q9Z123	Semaphorin-4F	Sema4f	24.9923	24.7312	24.8719	25.9628	25.3783	26.1807	26.8924	27.3069	26.7443	6	6	6	13.4	13.4	13.4	61.221	0	8.5666	530770000	19	3.36859	0.00242552
375	D3YWT1;D3Z3N4;D3Z6Y3	D3YWT1;D3Z3N4		Hnrnph3	29.1259	29.5794	29.5079	29.9481	30.5414	30.006	28.5456	28.7309	28.5848	12	10	10	48	45.6	45.6	35.181	0	323.31	3566000000	85	3.14416	0.00349217
376	D3YWX2;E9Q803;Q9R0I7;F6YTL8;Q8C8U8;Q3TMN3;Q3UTT5	D3YWX2;E9Q803;Q9R0I7;F6YTL8;Q8C8U8	YLP motif-containing protein 1	Ylpm1	27.1517	27.5738	27.2518	27.8628	28.3992	28.0848	25.9446	26.6453	26.0253	18	18	18	12.8	12.8	12.8	241.05	0	42.68	888010000	61	3.16008	0.00341982
377	D3YX85;Q6A074;Q7SIG6;Q3UH05;Q7SIG6-2;Q3TS63;K7N6H4;L7N2D1;J3KMP8;Q8C1G6	D3YX85;Q6A074;Q7SIG6;Q3UH05;Q7SIG6-2;Q3TS63	Arf-GAP with SH3 domain, ANK repeat and PH domain-containing protein 2	Asap2	29.4626	29.1414	29.1089	29.1846	29.2153	28.8492	29.9017	29.708	29.6719	31	31	2	48.1	48.1	3.9	106.4	0	106.44	3315200000	175	2.09476	0.0214634
378	D3YXH0;P63054	D3YXH0;P63054	Purkinje cell protein 4	Igsf5;Pcp4	29.0544	29.1779	29.5013	27.4712	27.4617	27.8495	28.3548	28.2799	28.5581	3	3	3	9.1	9.1	9.1	32.627	0	45.586	1451300000	31	3.73853	0.00132508
379	D3YXJ0;A0JP53	D3YXJ0;A0JP53	Diacylglycerol kinase	Dgkh	29.1979	29.0375	29.5446	26.6826	27.1593	27.1557	28.9983	29.165	28.9736	25	25	23	27.7	27.7	25	127.36	0	85.834	2411200000	113	4.49489	0.00039972
380	D3YXK0;Q3UPL4;Q8CEM9	D3YXK0		Jakmip2	25.525	25.1953	25.3514	24.8128	24.5173	25.3586	25.9249	25.7111	25.6862	11	11	10	14.5	14.5	13.4	96.315	0	19.278	310570000	21	1.65177	0.0466297
381	D3YXK1	D3YXK1	Atherin	Samd1	23.9735	24.3439	24.9058	24.6031	24.702	25.0023	23.8362	23.7807	23.4805	4	4	4	11.8	11.8	11.8	54.532	0	5.8127	80711000	9	1.79327	0.0363711
382	S4R1M2;D3YXK2;S4R2Q5;Q8BUQ3;E9PZ68;E9Q980	S4R1M2;D3YXK2	Scaffold attachment factor B1	Safb	30.8196	30.765	30.4362	31.5563	31.377	31.3241	29.1524	29.2857	28.7501	34	34	21	36.6	36.6	23	105.32	0	323.31	11742000000	250	4.55933	0.000356155
383	D3YXZ3;Q91YS4;O88448;D3Z5Y7	D3YXZ3;Q91YS4;O88448	Kinesin light chain 2	Klc2	30.8341	30.7395	30.7003	30.2361	30.3279	30.2029	31.31	31.1888	31.1122	30	30	24	48.5	48.5	37.4	68.176	0	283.93	11784000000	293	4.69712	0.000287697
384	F6T9K1;Q4FJW2;D3YY09;Q9D6N5;D3YYC2;G3UXH5	F6T9K1;Q4FJW2;D3YY09;Q9D6N5;D3YYC2;G3UXH5	Dr1-associated corepressor	Drap1	27.3722	26.0146	26.4229	27.5428	26.9441	26.6713	25.3069	25.4769	25.5072	4	4	4	24.7	24.7	24.7	19.971	0	9.8932	553570000	17	1.81483	0.0350573
385	D3YY50;Q9D725;F8WHX2;Q9D8X1	D3YY50;Q9D725;F8WHX2;Q9D8X1	Copper homeostasis protein cutC homolog	Cutc	27.3304	27.3596	27.2764	26.5767	27.1122	26.7819	26.0856	25.7596	24.9702	6	6	6	38.6	38.6	38.6	27.153	0	16.686	566490000	29	2.49721	0.0106294
386	D3YYD1;Q3UTQ7;Q3UTQ7-2	D3YYD1;Q3UTQ7;Q3UTQ7-2	PR domain zinc finger protein 10	Prdm10	24.7507	24.5738	24.5433	25.8333	25.317	25.6287	24.8103	23.8328	23.7525	4	4	4	4.2	4.2	4.2	127.87	0	8.1398	116310000	9	2.06661	0.022515
387	D3YYK8;E9Q6X0;Q8R001-2;Q8R001;Q3TG90	D3YYK8;E9Q6X0;Q8R001-2;Q8R001;Q3TG90	Microtubule-associated protein RP/EB family member 2	Mapre2	31.185	31.2929	31.1709	31.16	31.3093	31.4887	31.64	31.7837	31.9194	22	22	19	76.9	76.9	70.8	29.425	0	257.35	16749000000	392	2.40122	0.012609
388	D3YYM6;Q91V55;P97461	D3YYM6;Q91V55;P97461	40S ribosomal protein S5;40S ribosomal protein S5, N-terminally processed	Rps5	31.4205	31.3626	31.8224	31.7526	31.564	31.9502	30.2745	30.564	30.4941	11	11	11	56.6	56.6	56.6	20.413	0	259.89	17196000000	309	3.34606	0.00250691
389	D3YYN6;Q3UNN8-2;Q3UNN8;Q3UNN8-3	D3YYN6;Q3UNN8-2;Q3UNN8;Q3UNN8-3	Inactive phospholipase D5	Pld5	23.7582	24.3213	23.5411	24.827	24.9309	23.3302	26.9256	27.2721	26.8507	5	5	5	13.7	13.7	13.7	53.743	0	14.821	358400000	14	2.92652	0.00504079
390	E9Q3B9;D3YYS6;Q3UFX6;O35678;Q3UFN1;O35678-2	E9Q3B9;D3YYS6;Q3UFX6;O35678;Q3UFN1	Monoglyceride lipase	Mgll	30.72	30.5874	30.5752	29.615	29.7741	29.7009	31.0725	31.2005	31.1239	18	18	18	67.1	67.1	67.1	35.256	0	252.91	8472700000	314	5.93265	5.62062e-05
391	D3YYT1;Q922P9	D3YYT1;Q922P9	Putative oxidoreductase GLYR1	Glyr1	30.2573	30.3044	30.3314	31.5078	31.2113	31.3011	28.7892	28.8804	28.7074	27	27	27	57.1	57.1	57.1	60.435	0	323.31	9558000000	281	6.56942	2.89217e-05
392	D3YYW8;Q91V81;Q91V81-2	D3YYW8;Q91V81;Q91V81-2	RNA-binding protein 42	Rbm42	25.5425	26.1307	25.2603	27.6146	27.5362	26.8381	23.3666	24.2393	23.949	11	11	11	35.2	35.2	35.2	47.214	0	54.107	595490000	32	3.66942	0.00146741
393	D3YYY8;F6TAL7	D3YYY8		Arhgef26	26.1938	26.7717	26.0761	25.0338	25.2514	24.9699	26.8961	26.9974	26.6529	7	7	7	9.1	9.1	9.1	97.387	0	25.498	394910000	22	3.43127	0.00219454
394	D3YZ08;O35144;E9QM06;O35144-2;F6VIR4;Q8C9B6;Q8C806	D3YZ08;O35144;E9QM06;O35144-2	Telomeric repeat-binding factor 2	Terf2	28.5475	28.2433	28.1378	28.3997	28.6792	28.3061	26.4478	26.1078	25.7571	16	16	16	34.6	34.6	34.6	60.175	0	62.631	1447600000	86	4.28574	0.000546823
395	D3YZ09;Q3TKG5;Q9CY66-3;Q9CY66-2;Q9CY66;F6SL78	D3YZ09;Q3TKG5;Q9CY66-3;Q9CY66-2;Q9CY66;F6SL78	H/ACA ribonucleoprotein complex subunit 1	Gar1	26.9455	26.4355	26.7587	27.4151	27.5682	27.4842	25.2993	25.5451	25.7832	8	8	8	40.9	40.9	40.9	20.448	0	17.044	932140000	30	4.08478	0.000754228
396	D3YZ20;Q6PI63;O08740;D3YZ19;Q3TYI2	D3YZ20;Q6PI63;O08740;D3YZ19;Q3TYI2	DNA-directed RNA polymerase II subunit RPB11	Polr2j	25.5379	25.6205	25.4081	25.4436	26.9306	26.3513	23.6002	24.8072	24.3887	4	4	4	29.7	29.7	29.7	12.584	0	12.637	223230000	13	1.85849	0.0325464
397	D3YZ54;Q9QXE0;E9PWM4;E9Q0K0;E9Q7H7;E9Q9L4;D6RDE9	D3YZ54;Q9QXE0;E9PWM4	2-hydroxyacyl-CoA lyase 1	Hacl1	28.7041	28.6134	29.1234	27.6968	27.9986	27.8805	29.4882	29.4738	29.4422	20	20	20	49.8	49.8	49.8	60.995	0	107.84	2568800000	109	3.97377	0.000907774
398	D3YZ62;D3Z4J3;Q99104;F6TDE5;B8JK05;F6Z2S4;Q8BWY8;D6RFU0;F6SV01;D3Z135;F7DF36;REV__Q544F0;REV__P27808;Q6PER8	D3YZ62;D3Z4J3;Q99104	Unconventional myosin-Va	Myo5a	33.5714	33.6647	33.4204	33.3252	33.3944	33.2876	34.181	34.1822	33.9175	128	128	115	63.3	63.3	57.5	212.33	0	323.31	83631000000	1657	3.24243	0.00295646
399	D3YZC9;E9Q4Q2;D3YZD0;Q3UK67;Q3UI45;Q64213-2;Q64213-3;Q64213;Q3TZI3;D3YVH4;F8WHF9;D6RDB7;F6SRV1	D3YZC9;E9Q4Q2;D3YZD0;Q3UK67;Q3UI45;Q64213-2;Q64213-3;Q64213;Q3TZI3;D3YVH4	Splicing factor 1	Sf1	30.3054	30.157	30.3985	30.6114	30.3791	30.2949	28.296	27.8439	28.0599	16	16	16	39.2	39.2	39.2	61.755	0	203.03	6172600000	168	5.28374	0.000128042
400	D3YZI9;D3Z077;G3UX58;Q52KE6	D3YZI9;D3Z077;G3UX58;Q52KE6		Pgbd5	28.9548	29.0703	29.1133	28.2735	28.6318	28.418	29.6207	29.5671	29.9548	18	18	18	43.2	43.2	43.2	58.3	0	94.489	3113200000	88	3.57918	0.00171304
401	D3YZR3;D3YZR2;P56974-2;P56974;E9PUN9;P56974-4;P56974-3	D3YZR3;D3YZR2;P56974-2;P56974;E9PUN9;P56974-4;P56974-3	Pro-neuregulin-2, membrane-bound isoform;Neuregulin-2	Nrg2	25.264	24.9321	24.057	26.0782	26.3198	26.0213	24.4573	24.6123	23.7869	6	6	6	9	9	9	91.719	0	13.828	200720000	16	2.24552	0.0163915
402	D3YZU5;D3YZU1	D3YZU5;D3YZU1	SH3 and multiple ankyrin repeat domains protein 1	Shank1	32.4311	32.3911	32.3935	29.7802	30.1338	29.934	33.2581	33.3078	33.1261	81	81	4	51.9	51.9	2.3	225.46	0	323.31	29930000000	940	6.99968	1.72389e-05
403	D3YZV2;E9QKI2;Q63959;D3YZV4;D3YUC7;Q63959-2	D3YZV2;E9QKI2;Q63959;D3YZV4;D3YUC7;Q63959-2	Potassium voltage-gated channel subfamily C member 3	Kcnc3	30.6768	30.9028	31.0235	30.9869	31.0266	31.2038	31.5633	31.6167	31.8069	17	17	14	26.7	26.7	24.1	81.945	0	293.12	11873000000	322	2.92133	0.00507504
404	D3YZZ5;E9Q7G1;Q5DTS8	D3YZZ5;E9Q7G1		Tmed7	30.2225	30.0556	30.1046	30.2646	30.3511	30.332	29.6757	29.2913	29.3624	8	8	7	32.6	32.6	32.6	25.2	0	83.885	4548300000	122	3.37616	0.00239605
405	D3Z030;Q6EDY6-3;Q6EDY6;F7AI27;Q6EDY6-2;E9Q4H6	D3Z030;Q6EDY6-3;Q6EDY6;F7AI27	Leucine-rich repeat-containing protein 16A	Lrrc16a	28.1943	28.2402	28.1078	28.0638	27.6458	27.9066	28.8342	28.5829	28.5183	24	24	24	23	23	23	147.15	0	86.945	1642300000	107	2.51702	0.0102815
406	Q6NS79;D3Z074;E9PXV7;E9PV41;Q5DTQ4;O08808;Q3U104;Q3US76;Q05CS5;Q3UX40	Q6NS79;D3Z074;E9PXV7;E9PV41;Q5DTQ4;O08808;Q3U104	Protein diaphanous homolog 1	Diap1;Diaph1	26.9695	27.1998	27.3679	27.4768	27.914	27.7892	28.2985	28.0375	27.6521	22	22	22	20.4	20.4	20.4	135.84	0	39.173	1062800000	62	1.68584	0.0439255
407	D3Z079;Q8K400;D3Z2Q2;Q8K400-2;F6WXQ4	D3Z079;Q8K400;D3Z2Q2	Syntaxin-binding protein 5	Stxbp5	30.5941	30.5757	30.3927	30.2097	30.1894	30.2192	30.9699	30.6001	30.7154	32	31	31	41.5	40.8	40.8	123.6	0	293.78	8497700000	278	2.29249	0.0150631
408	J3QMN4;D3Z0K8;J3QMQ8;Q9JLT4-4;Q9JLT4;Q9JLT4-2;Q9JLT4-3;Q9D8I4	J3QMN4;D3Z0K8;J3QMQ8;Q9JLT4-4;Q9JLT4;Q9JLT4-2;Q9JLT4-3	Thioredoxin reductase 2, mitochondrial	Txnrd2	28.6978	28.5793	28.7479	29.5057	29.1446	29.1572	28.9738	28.7035	28.7436	14	13	13	43	39.9	39.9	53.051	0	48.386	2953200000	68	2.1294	0.0202558
409	D3Z0M9	D3Z0M9		Ddx23	29.4686	29.3475	30.0504	29.8865	29.856	29.892	27.9499	27.9739	28.0887	32	32	32	41.4	41.4	41.4	95.493	0	110.48	3903000000	143	4.03081	0.000824014
410	D3Z0P8	D3Z0P8		Tmem200b	26.3885	26.5089	26.4834	24.073	24.2882	24.0882	27.7258	27.2293	27.2436	8	8	8	41.5	41.5	41.5	30.336	0	56.432	482440000	32	5.80882	6.68818e-05
411	D3Z0Q6;Q9Z1E4	D3Z0Q6;Q9Z1E4	Glycogen [starch] synthase, muscle	Gys1	27.9953	28.3106	28.3586	28.2883	28.2269	28.1434	29.1946	29.0517	29.1874	22	22	21	41.4	41.4	39.9	76.623	0	99.242	2020100000	123	3.75371	0.001291
412	D3Z0T0;Q62311;D3Z5H6;S4R1R2	D3Z0T0;Q62311	Transcription initiation factor TFIID subunit 6	Taf6	27.1338	26.5655	26.3238	28.207	27.9127	27.5731	24.9007	25.2841	22.0139	14	14	14	30.7	30.7	30.7	69.796	0	41.882	651270000	43	1.90392	0.0300695
413	D3Z136;Q8BHI7;D3Z0Z6	D3Z136;Q8BHI7;D3Z0Z6	Elongation of very long chain fatty acids protein;Elongation of very long chain fatty acids protein 5	Elovl5	24.7154	25.8328	25.3756	26.2906	26.3311	26.5507	26.1202	25.89	26.0273	3	3	3	15.6	15.6	15.6	21.543	0	7.2826	355590000	28	1.66854	0.0452977
414	E6Y2W7;D3Z165;E6Y2W6;E9QP94;Q3TVA9-2;Q3TVA9;E6Y2W9;E6Y2W8	E6Y2W7;D3Z165;E6Y2W6;E9QP94;Q3TVA9-2;Q3TVA9	Coiled-coil domain-containing protein 136	Ccdc136	27.5109	27.5109	26.955	28.3313	28.243	27.9415	28.4419	28.1406	27.7347	17	17	17	24.6	24.6	24.6	106	0	70.358	2041200000	76	1.61535	0.049771
415	D3Z197;D3Z357;Q6P2L6;Q6P2L6-4;Q6P2L6-2	D3Z197;D3Z357;Q6P2L6;Q6P2L6-4;Q6P2L6-2	Histone-lysine N-methyltransferase;Histone-lysine N-methyltransferase NSD3	Whsc1l1	25.1267	25.2358	25.3906	25.6	25.5122	26.5721	23.9097	24.5326	24.4876	6	6	6	5.7	5.7	5.7	156.1	0	8.3171	196900000	17	2.07996	0.02201
416	D3Z1C5;P70662-2;P70662-3;P70662;O55203-3;O55203-2;O55203	D3Z1C5;P70662-2;P70662-3;P70662	LIM domain-binding protein 1	Ldb1	27.0234	26.3868	26.4401	26.6544	26.9299	26.4833	25.4214	25.1249	23.8992	7	7	7	25.5	25.5	25.5	42.583	0	17.828	401090000	20	2.12027	0.0205317
417	D3Z1I2;Q80XR8;J3QK07;F7BIK4;Q3UGB1;D3Z409	D3Z1I2;Q80XR8;J3QK07;F7BIK4		Git2	29.0065	29.0059	28.8013	28.2335	28.7643	28.419	29.4906	29.5712	29.5767	27	24	2	51.1	46.7	1.6	75.97	0	112.93	2996200000	128	3.09873	0.00377616
418	D3Z1N4;E9Q4Y5;F8VQD1;E9Q7L3;D3Z1W6;E9Q7L2;Q8BSQ9-2;Q8BSQ9;D3YYF2;F6THL5;D3Z3R4;D6RIL0;D6RI94;Q9D7L7;Q8R134;D3YYG4;D3Z1M8	D3Z1N4;E9Q4Y5;F8VQD1;E9Q7L3;D3Z1W6;E9Q7L2;Q8BSQ9-2;Q8BSQ9;D3YYF2;F6THL5;D3Z3R4	Protein polybromo-1	Pbrm1	27.7546	27.6221	26.4793	29.0271	28.7888	28.8033	26.597	26.3787	26.3524	37	37	37	27.1	27.1	27.1	189.64	0	74.039	1676600000	100	2.95503	0.00481757
419	D3Z2J4;D3Z632;Q05BP5;Q64362	D3Z2J4;D3Z632;Q05BP5;Q64362	AKT-interacting protein	Aktip	25.9607	26.642	26.5483	27.7297	27.5457	27.2633	26.328	26.382	26.1369	8	8	8	39.9	39.9	39.9	30.841	0	25.787	699780000	45	2.66378	0.00792243
420	D3Z396;Q8BG33;Q3TYC2;Q99PJ0;Q3USC2	D3Z396;Q8BG33;Q3TYC2;Q99PJ0;Q3USC2	Neurotrimin	Ntm	32.4215	32.5715	32.8905	32.241	32.437	32.5288	33.0008	32.9447	33.3437	17	16	4	47.5	45.6	13.9	34.954	0	323.31	43016000000	499	1.80418	0.0356784
421	D3Z619;D3Z3F1;D3Z4V2;Q9D824-4;Q9D824-3;Q9D824-2;Q9D824	D3Z619;D3Z3F1;D3Z4V2;Q9D824-4;Q9D824-3;Q9D824-2;Q9D824	Pre-mRNA 3-end-processing factor FIP1	Fip1l1	27.733	27.9239	27.9266	27.7661	27.6748	28.1209	25.3106	25.5341	24.9927	7	7	7	19.1	19.1	19.1	59.388	0	42.049	874740000	31	5.04001	0.000173543
422	D3Z4N6;E9QP07;Q80W14;Q80W14-3;E9QMI6;Q80W14-2;F6XW22;F6QF44	D3Z4N6;E9QP07;Q80W14;Q80W14-3;E9QMI6;Q80W14-2	Pre-mRNA-processing factor 40 homolog B	Prpf40b	26.1869	25.7908	26.2204	27.4381	26.8283	27.1111	24.7354	24.8154	24.5983	13	13	13	19.7	19.7	19.7	97.846	0	28.734	542070000	25	4.33979	0.000504816
423	D3Z5F7;D3YUB9;D3Z055;G3UWS5;P70345-2;P70345;G3UWY6;B7ZP52;Q5XFR0	D3Z5F7;D3YUB9		Gm20521;Pabpn1	29	28.8956	28.8873	29.762	29.3876	29.0428	27.5441	27.8097	28.5913	17	17	6	59.8	59.8	29.4	37.244	0	132.95	3487300000	136	1.99687	0.0254963
424	D3Z5K8	D3Z5K8		Shank2	31.2623	31.0616	31.4551	28.5854	28.8627	28.9315	32.1434	32.2511	32.2202	62	59	7	43.2	42.3	4.4	200.12	0	323.31	15168000000	463	6.28568	3.94272e-05
425	D3Z5N5;Q9Z1T6-1;Q9Z1T6;Q9Z1T6-3	D3Z5N5;Q9Z1T6-1;Q9Z1T6	1-phosphatidylinositol 3-phosphate 5-kinase	Pikfyve	28.8971	29.1011	28.3707	28.4235	28.5669	28.4518	29.9724	29.6852	29.407	25	25	25	15.2	15.2	15.2	232.08	0	45.665	2879100000	80	2.37368	0.0131472
426	D3Z5R4;E9Q2D0;P0C7L0-2;P0C7L0	D3Z5R4;E9Q2D0;P0C7L0-2;P0C7L0	WAS/WASL-interacting protein family member 3	Wipf3	28.0996	27.8122	28.1484	26.6317	27.367	26.4673	28.4656	28.2949	28.484	7	7	7	19.8	19.8	19.8	45.137	0	21.199	1052100000	41	2.79578	0.00626929
427	D3Z601;Q99JH7	D3Z601;Q99JH7	Calsyntenin-3	Clstn3	28.0323	28.5534	28.5476	27.2206	27.197	27.5974	27.9072	28.1145	28.0986	17	17	17	27.3	27.3	27.3	101.81	0	56.632	1615400000	67	2.43904	0.0118213
428	D3Z687;Q9DCT6-2;Q9DCT6;F6XN97;A2CF80;A2CF83;Q9DCT6-4;Q9DCT6-3;F6S0D5;F8WH46;H3BJI0	D3Z687;Q9DCT6-2;Q9DCT6;F6XN97;A2CF80;A2CF83;Q9DCT6-4;Q9DCT6-3;F6S0D5;F8WH46;H3BJI0	Chromatin complexes subunit BAP18	0610010K14Rik;Bap18	26.5691	27.1867	26.569	27.2756	27.9078	27.7814	25.9357	24.2767	23.9754	6	6	6	46.6	46.6	46.6	20	0	9.0133	528120000	17	2.33325	0.0140758
429	D3Z6I8;D3YVR0	D3Z6I8		Tpm3	31.7281	31.9374	31.7544	31.8856	31.7979	31.7915	32.2891	32.4972	32.3211	33	33	2	76.5	76.5	6.1	28.723	0	323.31	30297000000	351	3.21789	0.00309415
430	D3Z6S1;Q8BM55;Q8BM55-2;Q8BM55-3	D3Z6S1;Q8BM55;Q8BM55-2	Transmembrane protein 214	Tmem214	26.8411	27.456	27.2555	28.1095	27.8507	27.8995	26.2571	26.661	26.8795	16	16	16	27.1	27.1	27.1	71.302	0	78.232	829660000	64	2.60385	0.0088144
431	D3Z742;Q8C525	D3Z742;Q8C525	Protein MB21D2	Mb21d2	26.4376	26.52	26.5194	26.2422	26.4443	26.6118	27.4902	27.2144	27.655	8	8	8	19.3	19.3	19.3	55.656	0	22.059	568470000	22	3.2841	0.00275781
432	D3Z7D5;Q02788	D3Z7D5;Q02788	Collagen alpha-2(VI) chain	Col6a2	26.2978	26.6686	26.7094	25.0008	23.475	25.3398	26.4003	27.1341	26.5112	7	7	7	9.3	9.3	9.3	98.987	0	25.439	416550000	26	1.93286	0.0285727
433	D3Z7E5;Q2NL51	D3Z7E5;Q2NL51	Glycogen synthase kinase-3 alpha	Gsk3a	30.155	30.4247	30.5594	29.986	29.7183	29.8379	30.3784	30.8259	30.5548	22	13	13	52.1	38.7	38.7	51.245	0	227.79	6624600000	173	2.07623	0.0221105
434	Q8K027;D3Z7F1;Q9DBX6	Q8K027;D3Z7F1;Q9DBX6	Cytochrome P450 2S1	Cyp2s1	23.1398	23.9118	24.0125	24.3228	24.6716	24.4298	22.9268	22.985	23.5174	3	3	3	15.5	15.5	15.5	36.065	0.0014116	3.1411	103740000	11	2.00956	0.0250137
435	D3Z7P3;D3Z7P4;F7B327;F6U529	D3Z7P3;D3Z7P4	Glutaminase kidney isoform, mitochondrial	Gls	33.68	33.5338	33.711	34.2972	34.2941	34.3453	32.9138	33.0356	33.0261	39	39	10	63.5	63.5	16.2	73.963	0	323.31	90225000000	1426	5.89194	5.95409e-05
436	D6QSS8;Q9R1V6;Q9R1V6-13;Q9R1V6-15;Q9R1V6-8;Q9R1V6-14;Q9R1V6-11;Q9R1V6-12;D3YUP9;Q9R1V6-5;Q9R1V6-4;Q9R1V6-17;Q9R1V6-6;Q9R1V6-7;Q9R1V6-10;A4FUT9;Q9R1V6-20;Q9R1V6-1;Q9R1V6-9;Q9R1V6-19;Q9R1V6-2;Q9R1V6-18;Q9R1V6-21;Q9R1V6-16;F7CDH3;F6XRZ6;F6VJ78;F7BZ55;F7DAP1;F6XIT3;F6PZ09;D3YUQ0;F7BXL9;F6SK63;F6TDF4;F7AYY9;S4R1S5	D6QSS8;Q9R1V6;Q9R1V6-13;Q9R1V6-15;Q9R1V6-8;Q9R1V6-14;Q9R1V6-11;Q9R1V6-12;D3YUP9;Q9R1V6-5;Q9R1V6-4;Q9R1V6-17;Q9R1V6-6;Q9R1V6-7;Q9R1V6-10;A4FUT9;Q9R1V6-20;Q9R1V6-1;Q9R1V6-9;Q9R1V6-19;Q9R1V6-2;Q9R1V6-18;Q9R1V6-21;Q9R1V6-16	Disintegrin and metalloproteinase domain-containing protein 22	Adam22	31.5829	31.5459	31.7562	31.6203	31.486	31.5324	32.4171	32.4284	32.5594	32	32	32	43.6	43.6	43.6	99.714	0	323.31	24327000000	521	4.60291	0.000331299
437	D6REH1;Q5D073;P42925	D6REH1;Q5D073;P42925	Peroxisomal membrane protein 2	Pxmp2	24.3867	24.6669	24.3396	23.8392	24.0316	24.3605	25.6808	25.3752	24.598	4	4	4	58.6	58.6	58.6	9.4381	0	8.8916	139940000	15	1.61278	0.0499721
438	D9J2V6;Q71VB4;P41778-2;P41778;H3BJM6;Q99LS8;Q8BFR8;G3UXL9;O35317-2;O35317	D9J2V6;Q71VB4;P41778-2;P41778;H3BJM6;Q99LS8	Pre-B-cell leukemia transcription factor 1	Pbx1	24.6601	24.6592	23.5203	25.5571	25.7317	24.6239	23.7306	23.0713	22.5024	4	4	2	19.2	19.2	11.5	37.048	0	16.941	165170000	11	1.84729	0.033159
439	E0CX20;Q6PGH1	E0CX20;Q6PGH1	Protein BUD31 homolog	Bud31	28.6344	28.149	28.247	28.5207	28.9405	28.559	26.6154	27.0097	27.0894	9	9	9	53.5	53.5	53.5	17	0	91.117	2231300000	75	3.563	0.00175197
440	E0CX48;Q3UYK0;Q3URC5;P70689	E0CX48;Q3UYK0;Q3URC5;P70689	Gap junction protein;Gap junction beta-6 protein	Gjb6	28.9739	28.0926	28.0033	29.1999	29.2952	29.2609	27.3748	27.3465	27.3613	4	4	4	23.1	23.1	23.1	20.392	0	62.17	2713400000	57	3.03195	0.00422338
441	E0CXN5;P13707	E0CXN5;P13707	Glycerol-3-phosphate dehydrogenase [NAD(+)];Glycerol-3-phosphate dehydrogenase [NAD(+)], cytoplasmic	Gpd1	33.9009	33.957	33.819	32.7812	32.6763	32.7686	34.5745	34.5647	34.5025	29	29	27	85	85	81.6	35.231	0	323.31	95335000000	1274	7.25195	1.46583e-05
442	E0CXZ9;E0CXI4;E0CYS2	E0CXZ9		Kcnab2	30.5681	29.9818	29.8769	31.8962	31.3222	31.349	30.4744	30.4626	30.3386	21	21	1	55.8	55.8	2.4	42.734	0	245.21	10703000000	290	2.60678	0.00876449
443	E0CYH0;Q9ER69;Q9ER69-2;F7CCI4;Q571E0;E0CZF5	E0CYH0;Q9ER69;Q9ER69-2;F7CCI4	Pre-mRNA-splicing regulator WTAP	Wtap	25.5972	26.7103	25.8702	26.9996	27.5324	26.6954	25.063	25.0648	24.2098	8	8	8	26.8	26.8	26.8	44.203	0	19.378	477750000	18	2.38414	0.0129451
444	E9QMI9;E0CYT1;E9QMI8;E9QM73;E9Q6Q2;E9QJQ9;Q3UH66-7;Q3UH66-3;Q3UH66-5;Q3UH66-6;Q3UH66-4;Q3UH66;F6SRP4;Q3V473;F7BQG5;E9PZ38;E9Q470	E9QMI9;E0CYT1;E9QMI8;E9QM73;E9Q6Q2;E9QJQ9;Q3UH66-7;Q3UH66-3;Q3UH66-5;Q3UH66-6;Q3UH66-4;Q3UH66	Serine/threonine-protein kinase WNK2	Wnk2	28.7782	28.8563	29.0172	28.2342	28.7392	28.5363	29.4883	29.3647	29.9473	33	33	5	22.2	22.2	3.5	221.88	0	184.96	3387100000	139	2.41014	0.0124189
445	E0CYX9;Q3TC33;E0CYP1;Q3TC33-2;REV__D3YXG9;REV__B9EJ20;REV__E9QN53;REV__Q8C0X0;REV__B7ZP37;B7ZN01;A2A870-2;A2A870	E0CYX9;Q3TC33;E0CYP1;Q3TC33-2	Coiled-coil domain-containing protein 127	Ccdc127	28.2958	28.137	28.0335	29.49	28.9893	28.836	28.1774	28.4217	28.4098	10	10	10	45.4	45.4	45.4	27.735	0	92.633	2467100000	67	2.32847	0.0141855
446	E0CZ78;P48453-2;P48453;G3X8U7;E9Q6P2;Q3UXV4	E0CZ78;P48453-2;P48453;G3X8U7;E9Q6P2;Q3UXV4	Serine/threonine-protein phosphatase;Serine/threonine-protein phosphatase 2B catalytic subunit beta isoform	Ppp3cb	30.0657	29.912	29.9144	29.1379	29.205	29.0129	30.6075	30.4407	30.4443	23	14	14	51.7	34.4	34.4	59.074	0	161.88	6632600000	194	5.24597	0.000135598
447	E9PU93;Q3UKZ9;Q3UJ62;Q91X20;Q3UJY9;D3YYA0;D6RI55;D6RET1	E9PU93;Q3UKZ9;Q3UJ62;Q91X20;Q3UJY9;D3YYA0	Set1/Ash2 histone methyltransferase complex subunit ASH2	Ash2l	27.4047	26.414	27.7114	27.6021	27.7187	27.9586	25.8774	25.8964	24.8835	11	11	11	24.9	24.9	24.9	60.17	0	10.833	581780000	31	2.2762	0.0154851
448	E9PUA3;Q8R0S2;Q8R0S2-2	E9PUA3;Q8R0S2;Q8R0S2-2	IQ motif and SEC7 domain-containing protein 1	Iqsec1	30.6983	30.7928	30.9779	30.7268	31.0651	30.9918	31.3901	31.4662	31.2639	46	41	40	46.5	42.8	42.2	122.65	0	282.85	12861000000	317	2.12539	0.0203501
449	E9PUC4;Q6NSW3-2;Q6NSW3;Q6NSW3-3;Q6NSW3-4;Q9CTQ1	E9PUC4;Q6NSW3-2;Q6NSW3;Q6NSW3-3;Q6NSW3-4	A-kinase anchor protein SPHKAP	Sphkap	29.2872	29.2739	29.5264	29.9553	30.1409	30.1885	28.4317	28.5298	28.1903	38	38	38	35	35	35	182.09	0	323.31	3560000000	141	4.61555	0.000326433
450	E9PUD2;Q8K1M6-3;Q8K1M6-5	E9PUD2;Q8K1M6-3	Dynamin-1-like protein	Dnm1l	33.3449	33.2178	33.1707	33.1728	33.1445	33.0257	33.4973	33.6857	33.4503	50	50	4	82.2	82.2	6.2	79.532	0	323.31	58214000000	1201	2.31421	0.0145316
451	Q6KAM6;E9PUF7;Q61210-2;Q61210;Q61210-5;Q61210-3;Q61210-4;F6ZN61;D3YVJ9	Q6KAM6;E9PUF7;Q61210-2;Q61210;Q61210-5;Q61210-3;Q61210-4;F6ZN61	Rho guanine nucleotide exchange factor 1	Arhgef1	26.8148	27.0889	26.9467	27.2677	27.0607	27.1014	27.6962	27.6451	27.9458	14	14	14	24.7	24.7	24.7	104.63	0	52.124	740920000	48	3.06675	0.0039896
452	E9PUG7;Q61211;Q61211-2;Q8C8I3	E9PUG7;Q61211;Q61211-2	Eukaryotic translation initiation factor 2D	Eif2d	24.6001	24.2504	24.8344	24.6007	24.1956	24.3087	25.4041	24.9374	25.0722	5	5	5	15.2	15.2	15.2	60.877	0.00015202	4.7419	147400000	13	1.65476	0.0464435
453	E9PUH7	E9PUH7	Nuclear factor 1	Nfix	29.4872	29.5596	30.3188	29.5807	30.2685	30.3641	27.455	27.7476	28.244	19	15	0	51.4	42.1	0	54.161	0	75.451	3201000000	79	2.88819	0.00535276
454	E9PUL5	E9PUL5	Proline-rich transmembrane protein 2	Prrt2	31.1564	31.5047	31.9698	31.31	31.6252	31.6708	32.8931	32.9154	33.2739	10	10	10	46.2	46.2	46.2	35.923	0	323.31	35981000000	261	2.97746	0.00464287
455	E9PUL7;Q9JIZ0;G3UWY7;E0CYC6;Q8CHQ9	E9PUL7;Q9JIZ0	Probable N-acetyltransferase CML1	Cml1	23.5586	24.0167	24.2859	23.8382	23.4685	22.539	26.6317	26.3036	26.3258	5	5	3	17.7	17.7	12.1	26.216	0	7.8792	197160000	11	3.46428	0.00205812
456	E9PUM4;B2RY15;Q71LX4;Q8CDM9;Q6PB69;Q3TN69;Q3TKJ2	E9PUM4;B2RY15;Q71LX4;Q8CDM9	Talin-2	Tln2	32.0867	32.2147	32.0635	32.1242	32.1584	32.1885	32.4243	32.4097	32.4638	103	103	12	58.7	58.7	6.2	271.66	0	323.31	27383000000	791	3.15845	0.00342752
457	Q3UGZ9;E9PUM9;E9Q7X7;E9Q5N7;B2RX09;Q6ZQ25;E9PUN0;F6WN33;F6Y027;Q6PAI9;O88723	Q3UGZ9;E9PUM9;E9Q7X7;E9Q5N7;B2RX09;Q6ZQ25;E9PUN0		Nrxn2;mKIAA0921	29.6598	29.7584	30.0129	28.6338	28.7695	28.6228	30.9934	30.9902	31.1144	38	31	23	27.3	23.4	17.6	183.95	0	323.31	6206500000	165	5.91794	5.73007e-05
458	E9PUN2;Q3TQ54;E9PUN1	E9PUN2;Q3TQ54;E9PUN1		Nrxn2	26.5092	25.731	26.638	25.0251	24.2514	24.0542	27.7048	26.7429	27.1466	14	3	3	23.2	4.2	4.2	70.384	0	13.598	417680000	23	2.86542	0.00556002
459	Z4YJU8;Q5DTL1;E9PUQ5;Q921M4-2;Q921M4;A2AN46;A2AN45;A2AN48;F8WGE0;Q3UT29;Q9D9W6	Z4YJU8;Q5DTL1;E9PUQ5;Q921M4-2;Q921M4	Golgin subfamily A member 2	Golga2	28.3059	28.4216	28.478	28.3167	28.7024	28.857	27.4054	27.5944	27.8088	19	19	19	27.4	27.4	27.4	108.63	0	88.237	1775600000	88	2.6907	0.00757733
460	E9PUQ8;Q6A0B7;Q80Y60;F6UUZ3;Q6DIC8;E9Q7N4	E9PUQ8;Q6A0B7	Diacylglycerol kinase	Dgkd	26.3258	26.1005	26.3997	26.8336	27.5118	26.7525	25.6297	25.6072	25.8168	13	11	11	15.7	13.2	13.2	135.21	0	16.585	415890000	22	2.62191	0.00856652
461	E9Q1M6;E9PUR0;Q6KAP1;Q8BXZ6;Q8C103;F6SI14;F7C545;F6YYD3;Q6ZPY4;Q8C5C5;F6RUI8;F7DE17;Q5BJ28	E9Q1M6;E9PUR0;Q6KAP1;Q8BXZ6;Q8C103		Ankhd1;mFLJ00246	26.7474	26.4572	26.8866	26.9112	26.4703	27.1498	25.8559	25.7749	26.206	12	12	4	6	6	1.8	263.4	0	34.213	401370000	37	1.86229	0.0322978
462	E9PV14;Q8C8P2	E9PV14;Q8C8P2		Epb4.1l1	28.1316	28.7459	28.3547	28.586	29.3511	29.1619	26.3085	25.5819	25.6716	42	11	11	45.1	17.8	17.8	117.17	0	31.529	1188200000	54	4.00617	0.000858192
463	E9PV21;G3X8X1;Q8VE09	E9PV21;G3X8X1;Q8VE09	Tetratricopeptide repeat protein 39C	Ttc39c	28.0669	27.9243	28.2091	27.4938	27.3885	27.5049	28.7412	28.7718	28.8436	14	14	14	35.4	35.4	35.4	58.916	0	96.772	1601100000	96	5.08225	0.000165646
464	Q99K47;E9PV24;Q08284;CON__P02672	Q99K47;E9PV24	Fibrinogen alpha chain;Fibrinopeptide A;Fibrinogen alpha chain	Fga	29.4484	29.4727	29.6353	28.212	28.2886	28.3902	28.3388	28.2936	27.9757	14	14	14	33.6	33.6	33.6	61.325	0	117.5	2174700000	73	4.39359	0.000472277
465	Q6NVE5;E9PV26;H3BLA4;H3BJU6	Q6NVE5;E9PV26		Prr36	26.4375	26.6226	26.1914	24.0453	24.9994	24.7231	27.9653	28.0714	27.9857	12	12	12	16.5	16.5	16.5	107.62	0	59.836	677560000	47	4.48108	0.000409512
466	E9Q1I2;E9PV68;Q8R2Y9;E9Q199;E9Q2V9;E9PW70;Q8R2P2;Q3TJ87;Q8BGW5-2;Q8BGW5	E9Q1I2;E9PV68;Q8R2Y9;E9Q199	SOSS complex subunit B1	Nabp2	25.0556	25.4493	25.0249	25.5495	26.0752	25.7259	21.7797	24.5102	22.265	4	4	4	30.5	30.5	30.5	16.362	0	20.918	163040000	12	1.8678	0.0320168
467	E9PVA8;Q3UHQ5;B2RWW6;Q8CHH7;Q6PGM5;Q640Q4;Q8BIX2;Q3U3Z4;Q8BTM7;Q6NV94	E9PVA8;Q3UHQ5;B2RWW6;Q8CHH7;Q6PGM5;Q640Q4		Gcn1l1	30.0522	30.0827	29.9037	30.1229	30.019	29.9411	29.8205	29.7727	29.726	85	85	84	39.7	39.7	39.5	293.02	0	323.31	5504400000	381	1.84048	0.0335635
468	E9PVU0;E9Q175;Q8BK95	E9PVU0;E9Q175		Myo6	31.2538	31.3705	31.2899	31.2536	31.0861	30.8752	31.6762	31.5911	31.5847	65	65	1	60.5	60.5	1.3	146.31	0	323.31	15171000000	584	2.40588	0.0125046
469	E9PX67;E9Q7T0;E9PVU6;E9Q7E8;E9QK53;E9PX60;E9Q5C3;E9PX88;E9PX90;D3Z5M8;E9Q5C2;E9PXV8;B9EKY4;E9Q7C7;E9Q708;B7ZWP2;E9Q7E6;E9Q700;A1YYN0;A1YYN6;A1YYM9;A1YYN9;A1YYM4;P21803;D6RJK5;A1YYN4;A1YYN8;A1YYN1;A1YYN5;A1YYN2;A1YYN7;A1YYP0;A1YYM8;A1YYP1;A1YYM5;A1YYM7;A1YYM6;A1YYM3;P21803-2;F7BDU9	E9PX67;E9Q7T0;E9PVU6;E9Q7E8;E9QK53;E9PX60;E9Q5C3;E9PX88;E9PX90;D3Z5M8;E9Q5C2;E9PXV8;B9EKY4;E9Q7C7;E9Q708;B7ZWP2;E9Q7E6;E9Q700;A1YYN0;A1YYN6;A1YYM9;A1YYN9;A1YYM4;P21803;D6RJK5;A1YYN4;A1YYN8;A1YYN1;A1YYN5;A1YYN2;A1YYN7;A1YYP0;A1YYM8;A1YYP1;A1YYM5;A1YYM7;A1YYM6;A1YYM3;P21803-2	Receptor protein-tyrosine kinase;Fibroblast growth factor receptor;Fibroblast growth factor receptor 2	Fgfr2	26.1023	25.1796	25.5548	25.2952	25.1817	24.9528	26.7631	26.1269	26.616	8	8	6	11.1	11.1	8.1	91.187	0	12.724	336270000	17	2.09875	0.0213451
470	E9PVU7;B1PSD9;B2KF57;B2KF84;A2RSH1;Q01063-2;Q01063;A6XDA6;Q01063-3;A6XDB1;A6XDA7;A6XDB0;F6YIS2;Q8CBK2	E9PVU7;B1PSD9;B2KF57;B2KF84;A2RSH1;Q01063-2;Q01063;A6XDA6;Q01063-3;A6XDB1;A6XDA7;A6XDB0	cAMP-specific 3,5-cyclic phosphodiesterase 4D	Pde4d	28.1276	27.5283	28.1009	27.4562	27.848	27.8272	28.739	28.5762	28.4487	21	18	2	37.2	33.3	3.7	90.758	0	145.87	2024500000	90	1.93613	0.0284227
471	E9PW20;Q9CY57-3;Q9CY57;D3YZA1;D3Z7T7;Q2VPR3;B7ZMS6;Q9CY57-5;Q9CY57-4;Q9CY57-2	E9PW20;Q9CY57-3;Q9CY57;D3YZA1;D3Z7T7;Q2VPR3;B7ZMS6;Q9CY57-5;Q9CY57-4;Q9CY57-2	Chromatin target of PRMT1 protein	Chtop	30.5258	30.1198	30.2016	30.6419	30.9373	30.8846	29.5559	29.0824	28.8108	9	9	9	38.4	38.4	38.4	22.106	0	202.33	6610600000	131	3.15318	0.00344861
472	E9PWE8;Q3TT92;Q62188;Q3TAS8;D3YUS0;D3Z567;Q71H74	E9PWE8;Q3TT92;Q62188;Q3TAS8	Dihydropyrimidinase-related protein 3	Dpysl3	31.8098	31.86	31.6315	33.0168	32.8485	32.8908	32.2681	32.1435	32.3404	31	25	25	65.2	56.8	56.8	73.884	0	323.31	31374000000	488	4.52893	0.000376773
473	E9PWG2;Q69ZT3;Q8BJI6;E9PY51;Q6P6J3;Q811K7;Q9CU98	E9PWG2;Q69ZT3;Q8BJI6;E9PY51		Trappc8	29.5305	29.6276	29.8835	29.4541	29.5347	29.5489	29.9067	29.8972	30.0112	38	38	38	35	35	35	160.91	0	116.44	4824400000	178	1.94799	0.0278028
474	Q14AY4;E9PWG9;O35099;Q8CC79	Q14AY4;E9PWG9;O35099	Mitogen-activated protein kinase kinase kinase 5	Map3k5	27.3533	27.6921	27.6404	27.4952	27.1567	27.1609	27.9379	28.1851	27.928	22	22	22	21.4	21.4	21.4	153.61	0	46.085	1143900000	74	2.2442	0.0164344
475	G3UW40;Q3TYX4;E9PWI3	G3UW40;Q3TYX4;E9PWI3		Mcc	27.4898	27.0675	28.1242	26.2592	26.3306	26.3545	27.8872	28.1286	27.5782	8	8	8	13.2	13.2	13.2	92.813	0	14.554	861960000	22	2.45811	0.0113981
476	J3QQ16;E9PWQ3;O88493;D3YWD1;Q9Z0I9;Q66K11;Q80VJ0;Q6PES2;REV__E9QPT8;REV__Q9EPL5;Q99K31	J3QQ16;E9PWQ3;O88493;D3YWD1;Q9Z0I9		Col6a3	29.8384	30.0999	30.1311	27.9161	28.3232	28.6972	30.2796	30.3972	30.436	53	53	36	25	25	17.3	288.69	0	137.27	4467500000	204	3.94693	0.000943464
477	E9PZA7;E9QLK7;E9PWT1;F7CGG2;Q3UH32;Q80YV3;Q8BW25;D3YY11;REV__Q9D611	E9PZA7;E9QLK7;E9PWT1;F7CGG2;Q3UH32;Q80YV3	Transformation/transcription domain-associated protein	Trrap	29.341	28.8679	29.1522	29.9214	29.4934	29.4698	27.7514	27.7572	27.3428	76	76	66	24.9	24.9	21.8	434.04	0	151.2	2692600000	199	3.86709	0.00106975
478	E9PWV3;Q505N6;F6RQA2;F6Q8A4;Q810V8;P18653;Q3TIM6;Q3UFZ5;G3UZI3;B1AXP0;B1AXN5;B1AXN8;Q3V226;A2CEE6;A2CEE5;E9PUP0;A2CEE7;E9QK39;Q7TPS0-2;Q7TPS0-3;Q7TPS0;F6UG16;B2GVN8;A2CEE8;B1B0X1;Q8C0P0-2;Q8C0P0	E9PWV3;Q505N6;F6RQA2;F6Q8A4;Q810V8;P18653;Q3TIM6;Q3UFZ5;G3UZI3	Ribosomal protein S6 kinase;Ribosomal protein S6 kinase alpha-1	Rps6ka1	31.5018	31.4871	31.4761	30.8747	30.9323	30.8818	31.9413	32.0224	31.855	40	40	26	64.3	64.3	44.4	81.311	0	294.69	17364000000	478	6.02177	5.46138e-05
479	E9PWY9;Q8C0C7;Q8BJG2;Q8BXN0;Q4FJQ2;Q3U0Y9;Q9CT72;D6RIJ2	E9PWY9;Q8C0C7;Q8BJG2;Q8BXN0;Q4FJQ2	Phenylalanine--tRNA ligase alpha subunit	Farsa	31.2646	30.9914	30.964	30.7561	31.203	31.1148	29.9468	30.0486	29.8212	24	24	24	60.9	60.9	60.9	57.47	0	304.16	9297700000	250	3.417	0.00223746
480	E9PX09;Q6ZPS2;Q6ZPS2-2;Q6ZPS2-3	E9PX09;Q6ZPS2;Q6ZPS2-2	Carnosine synthase 1	Carns1	23.3773	24.6279	24.6679	26.6443	26.3967	26.6859	23.2258	23.1879	25.0757	10	10	10	16.8	16.8	16.8	102.14	0	18.603	207260000	15	2.0511	0.0231573
481	E9PX29;Q91ZE6;Q8VIE5;E9PZC2;Q8VBX2;Q9EQM0;D3YWH8;D3Z4P8;Q66JV7;Q66JV7-2	E9PX29;Q91ZE6;Q8VIE5		Sptbn4	31.3284	31.3654	31.2953	32.2407	32.2263	32.1321	31.1914	31.1533	31.0234	115	111	110	56.9	55.6	55.1	288.82	0	323.31	19399000000	644	5.70241	7.29703e-05
482	E9Q812;H3BJY5;E9PX33;Q8CFT0;Q8BRJ3	E9Q812;H3BJY5;E9PX33;Q8CFT0;Q8BRJ3	RELT-like protein 2	Rell2	25.796	26.0606	26.0589	26.8542	26.491	26.998	26.4264	27.0012	26.9778	4	4	4	40.8	40.8	40.8	18.675	0	103.38	634390000	22	1.93228	0.0285895
483	E9Q585;E9PX68;Q3UHY0;Q5BKS1;O54716;E9Q1Q0;Q3UUI2;Q6GQW1;Q7TNP8	E9Q585;E9PX68;Q3UHY0;Q5BKS1;O54716;E9Q1Q0;Q3UUI2;Q6GQW1		Slc4a1ap	25.797	26.1385	25.7234	26.2225	26.1835	25.8708	25.0317	23.6296	24.8745	8	8	8	15.5	15.5	15.5	79.671	0	16.692	289780000	22	1.89263	0.0306249
484	E9PX70;Q60847-4;Q60847-3;Q60847-2;Q60847-5;Q60847;Q3TNZ7	E9PX70;Q60847-4;Q60847-3;Q60847-2;Q60847-5;Q60847	Collagen alpha-1(XII) chain	Col12a1	25.6849	25.8069	26.7543	24.3749	22.484	24.1281	27.8825	27.2515	27.5031	18	18	18	8.5	8.5	8.5	333.73	0	43.25	533910000	39	2.8173	0.00604221
485	E9PXB7;Q8CFI0;Q641N8;G3X9H8;Q8CFI0-2;Q80U03	E9PXB7;Q8CFI0;Q641N8;G3X9H8;Q8CFI0-2	E3 ubiquitin-protein ligase NEDD4-like	Nedd4l	29.1731	29.1422	29.0287	29.3941	29.1445	29.3496	29.74	29.8637	29.7987	30	30	1	36.3	36.3	1.9	112.22	0	138.06	3837200000	173	3.5177	0.00187132
486	Q003U3;E9PY13;E9PY12;E9PXE1;E9QPM7;Q6PDM6;E9PXE2;Q64096;D3YUF4;G3UXP9;E9Q863;Q3UHQ9;G3UX72;D3YUF3;G3UYM8;Q80U26;F6VR53;Q8C7Z1;F6WPM5;F7BZ65;F6ZFQ8;Q8C474;F6UKC6	Q003U3;E9PY13;E9PY12;E9PXE1;E9QPM7;Q6PDM6;E9PXE2;Q64096;D3YUF4;G3UXP9;E9Q863;Q3UHQ9;G3UX72;D3YUF3;G3UYM8;Q80U26;F6VR53	Guanine nucleotide exchange factor DBS	Mcf2l	27.6512	27.9933	28.0369	27.1323	27.0695	26.8968	28.4007	28.5336	28.2839	23	21	21	26.7	25.4	25.4	123.52	0	66.978	1369800000	63	3.91838	0.000984969
487	E9Q0D4;E9Q305;E9PXF8;Q6NX80;Q8BJP4;Q8BJD2;Q8BX53;Q69ZA9;Q91VH0;F6QG63;F6ZDC5;E9Q372;Q80ZM6;Q8BJ67;F6QZ02;F7BBM8;Q8C135	E9Q0D4;E9Q305;E9PXF8;Q6NX80;Q8BJP4;Q8BJD2		Sbf2	27.6558	27.6547	27.417	27.2156	26.959	27.1412	28.5255	28.5649	28.4831	32	29	28	20.9	19.6	19.2	205.02	0	85.836	1158200000	63	4.87705	0.00022051
488	E9PXG9;Q3UDN2;Q3TLZ3;Q8CCB4;Q3TX19;Q3TJT1;Q8CCB4-2;E9PYD3;E9PWD1;E9Q648;F6Z4G7	E9PXG9;Q3UDN2;Q3TLZ3;Q8CCB4;Q3TX19;Q3TJT1;Q8CCB4-2	Vacuolar protein sorting-associated protein 53 homolog	Vps53	28.7235	28.8857	29.0824	29.0211	29.2421	28.9084	29.4828	29.4411	29.4342	25	25	25	42.8	42.8	42.8	91.121	0	75.002	3077100000	134	2.08907	0.0216756
489	E9PY16;Q6PGM4;Q8BVR8;B7ZMY4;Q8BVS1	E9PY16;Q6PGM4;Q8BVR8;B7ZMY4;Q8BVS1		Adap1	30.0356	29.9521	29.7361	30.3576	30.1973	30.2348	29.984	29.7769	29.6708	26	26	25	65	65	65	43.37	0	92.779	5304500000	217	1.81435	0.0350715
490	E9PYG6;Q91YX7;Q3V090;Q3TTA2	E9PYG6;Q91YX7;Q3V090;Q3TTA2		Rasa1	28.7392	28.5385	28.9428	28.0789	27.8432	27.8202	29.0478	28.8626	28.9236	27	27	27	30.8	30.8	30.8	115.43	0	82.574	1845400000	110	3.41081	0.00225949
491	E9QMK2;E9PYH0;Q62059-3;Q62059;E9QMK3;G3XA35;Q62059-4;Q62059-2;Q05CR7;Q3TNR6;Q3UXS4;Q8BS97;Q3TQ47;Q4VA91;F7B603;Q3TTS3;Q8C9U7;F7B6F7;E0CZC0	E9QMK2;E9PYH0;Q62059-3;Q62059;E9QMK3;G3XA35;Q62059-4;Q62059-2	Versican core protein	Vcan	31.5419	31.5206	31.6228	32.2235	31.9575	32.3154	30.8575	30.8148	30.7538	29	29	29	19.9	19.9	19.9	178.5	0	323.31	18403000000	360	4.6514	0.000308174
492	E9PYH6;D3YX07;D3YUD4;Q80V17;Q80V59;Q91Z33;D3YXL2	E9PYH6	Histone-lysine N-methyltransferase	Setd1a	26.7125	26.0596	26.0011	26.7065	27.1516	26.2942	24.5974	24.3697	24.7604	15	15	15	13.9	13.9	13.9	186.06	0	20.878	418610000	29	3.13342	0.00356368
493	E9PYJ7;Q6ZPQ6-2;Q6ZPQ6;Q6NS55;Q3UHB3;Q3UEE4;Q3TPA5;E0CXR4	E9PYJ7;Q6ZPQ6-2;Q6ZPQ6;Q6NS55	Membrane-associated phosphatidylinositol transfer protein 2	Pitpnm2	27.1973	27.4212	27.7628	26.8303	27.1305	26.8667	27.9177	28.1331	28.4783	23	22	22	20.8	20.2	20.2	147.62	0	51.861	1091400000	69	2.55901	0.00955595
494	E9PYK2;E9Q6A0;Q19AB2;Q19AB3;Q7TPD3-2;Q7TPD3	E9PYK2;E9Q6A0;Q19AB2;Q19AB3;Q7TPD3-2;Q7TPD3	Roundabout homolog 2	Robo2	23.2867	23.6338	23.5639	23.2503	23.1147	23.8585	24.2927	25.345	24.5139	2	2	2	2.4	2.4	2.4	130.75	0.00058292	3.7708	51822000	3	1.87788	0.0314075
495	Q69ZN8;E9PYL2;Q6PDJ2;Q8R3A6	Q69ZN8;E9PYL2;Q6PDJ2		Prr12	23.2431	24.0997	24.6694	25.8051	25.9013	25.9467	23.4499	23.3925	22.2104	9	9	9	7.3	7.3	7.3	192.48	0	6.6017	174910000	14	2.58985	0.00902496
496	E9PYL9;Q9CXW4;Q8VC94;A2BH06	E9PYL9;Q9CXW4;Q8VC94;A2BH06	60S ribosomal protein L11	Gm10036;Rpl11	31.5179	31.7596	31.993	31.9084	31.9413	31.8221	31.1059	31.2942	31.0755	8	8	2	37.1	37.1	10.7	20.266	0	82.722	14086000000	105	2.561	0.00952731
497	E9PYQ1;E9Q1D5;Q62219-7;Q62219-10;Q62219-9;Q62219-5;Q62219-4;Q62219-2;Q62219;Q62219-3	E9PYQ1;E9Q1D5;Q62219-7;Q62219-10;Q62219-9;Q62219-5;Q62219-4;Q62219-2;Q62219;Q62219-3	Transforming growth factor beta-1-induced transcript 1 protein	Tgfb1i1	25.9234	25.2238	25.6919	24.9656	25.3001	25.0422	25.7303	26.1905	26.0936	8	8	8	26.1	26.1	26.1	43.771	0	11.895	247890000	27	1.75112	0.0391459
498	Q3U4A0;F8VQK6;E9PYR1;A4VCH8;Q14BU8	Q3U4A0;F8VQK6;E9PYR1;A4VCH8;Q14BU8		Fbxl18	27.6288	27.3344	27.3925	26.9902	26.9992	27.2177	26.9784	26.626	26.7667	14	14	14	30.7	30.7	30.7	77.67	0	43.674	807470000	52	2.23818	0.016627
499	E9PYT3;Q91YH5;Q91YH5-2	E9PYT3;Q91YH5;Q91YH5-2	Atlastin-3	Atl3	28.4616	28.4086	28.2771	28.7602	28.6034	28.8444	28.3008	28.2764	28.1093	12	11	11	34.3	33	33	60.231	0	134.01	1597300000	56	2.50156	0.0105665
500	E9PZ00;Q3TXJ0;Q8BFQ1;Q3U8C4;Q3U897;Q3U825;Q3TXP9;Q3TWL8;Q3TIT5;Q3TWM9;Q3UAS4;Q3U5W2;Q3TWF9;Q3TKB2;Q3TID4;Q3TWE9;K3W4L3;B2RUD7;J3QPG5;Q3TKK3;Q3UE29	E9PZ00;Q3TXJ0;Q8BFQ1;Q3U8C4;Q3U897;Q3U825;Q3TXP9;Q3TWL8;Q3TIT5;Q3TWM9;Q3UAS4;Q3U5W2;Q3TWF9;Q3TKB2;Q3TID4;Q3TWE9;K3W4L3;B2RUD7;J3QPG5;Q3TKK3;Q3UE29		Psap	32.2408	32.1559	32.2961	32.5271	32.5871	32.6306	31.4654	31.7379	31.7211	22	22	1	47	47	3.6	60.672	0	214.38	29925000000	300	4.07618	0.000763957
501	E9PZ16;B1B0C7;Q05793;Q3UHH3;Q5RKM8;Q52KG8;Q2XQV0	E9PZ16;B1B0C7;Q05793;Q3UHH3	Basement membrane-specific heparan sulfate proteoglycan core protein;Endorepellin;LG3 peptide	Hspg2	31.8125	31.7621	31.8446	31.2665	31.5575	31.4342	31.6237	31.7072	31.6785	105	105	105	37.9	37.9	37.9	469.78	0	323.31	17074000000	738	2.2558	0.0160575
502	E9PZ19;D3Z169;Q5DU06	E9PZ19;D3Z169		Igsf9b	27.9067	28.368	28.84	29.0477	29.193	29.1758	27.6376	27.7292	28.2709	21	21	21	23.2	23.2	23.2	144.95	0	128.96	2291700000	97	1.97177	0.0266427
503	E9PZ26;G5E8P1;Q3UE68;E9Q412;Q571F6;A1L3T8;Q80UP2;A7MCW6;REV__Q8CGT7;B2KF05	E9PZ26;G5E8P1;Q3UE68;E9Q412;Q571F6		Brd1	26.0095	26.1724	24.9469	27.764	27.5254	27.5787	25.3899	25.2089	24.8415	15	15	14	13.9	13.9	13.4	133.37	0	34.065	642450000	35	3.05309	0.00407369
504	E9PZ43;E9PWC0;P27546-4	E9PZ43;E9PWC0;P27546-4	Microtubule-associated protein;Microtubule-associated protein 4	Map4	29.1472	29.1103	29.3706	28.8775	28.7842	28.4787	29.3632	29.208	29.0243	39	18	18	47.3	24.3	24.3	97.795	0	77.43	3649500000	108	1.67339	0.0449103
505	E9PZA8;Q0D2K7;Q8CF95;Q9R0N7	E9PZA8;Q0D2K7;Q8CF95;Q9R0N7	Synaptotagmin-7	Syt7	30.56	30.5142	30.3844	29.8066	29.6947	29.5853	31.1938	31.3155	31.0591	23	23	3	48.1	48.1	9.9	63.098	0	200.93	8662800000	204	4.99715	0.000182522
506	G3X9T8;G3X8Q5;E9PZD8;Q61147;Q8BV37;Q2F3J4;G3UXG1;G3UZ53;G3UWP5;CON__ENSEMBL:ENSBTAP00000031900	G3X9T8;G3X8Q5;E9PZD8;Q61147;Q8BV37	Ceruloplasmin	Cp	28.016	28.1532	28.2929	27.2014	27.3624	27.2381	27.4002	27.2095	27.7464	18	18	18	23.3	23.3	23.3	121.08	0	44.506	1331800000	68	2.63218	0.00841244
507	E9PZM4;G3V014;Q8C7Q2;Q9D5K6;Q3USG6;Q3UZW3;G3UXJ4;Q3V177;Q3V0V7;F7CDZ7;Q8BJ75;Q8BIE8	E9PZM4	Chromodomain-helicase-DNA-binding protein 2	Chd2	27.4115	26.6246	27.1243	28.1971	28.2348	27.8764	25.4613	25.7371	23.6409	21	21	16	13.2	13.2	10.8	210.8	0	37.642	933290000	61	2.37422	0.0131434
508	E9PZP8;Q8BNF7;Q8BR49;Q99KS8;F6RXM1;Q8BNK4;Q4VBD0;Q3UF38;Q8CB86;Q8CBQ0;Q9CS23	E9PZP8		Herc1	28.6721	28.8176	28.9364	28.2944	28.2986	28.3899	28.9427	28.8319	28.9898	55	55	55	15.4	15.4	15.4	532.65	0	90.717	2256000000	148	3.24244	0.00295869
509	K3W4M2;E9PZQ0;P70272;Q99JF3	K3W4M2;E9PZQ0	Ryanodine receptor 1	Ryr1	28.1854	27.8704	26.8539	26.1864	26.3441	25.8049	28.784	28.8353	28.7092	54	45	43	13.7	11.9	11.2	564.89	0	62.682	1447800000	89	3.06195	0.00401395
510	E9Q035;P47758;Q542X6;F7BAE9;F7CJN9;E9Q2Q7;E9Q939;CON__Q2HJF0	E9Q035		Gm20425	31.8422	31.8979	31.7949	31.5927	31.6078	31.5708	31.0246	31.1167	31.105	56	56	16	59.2	59.2	16.7	107.8	0	323.31	16632000000	450	5.75752	6.89201e-05
511	F6TVP2;E9Q0K6;F8WJE0;Q60710;Q3TCJ7;Q8C5C0;E9PYG9;Q3UDX7;Q6ZQM3;Q3U754;Q3UBG9;E0CXZ5	F6TVP2;E9Q0K6;F8WJE0;Q60710;Q3TCJ7;Q8C5C0;E9PYG9;Q3UDX7;Q6ZQM3	Deoxynucleoside triphosphate triphosphohydrolase SAMHD1	Samhd1	27.0043	26.8949	26.5133	27.6718	26.9313	26.9891	25.8752	25.963	25.7757	16	16	16	32.6	32.6	32.6	72.746	0	36.858	561050000	45	2.47524	0.0110904
512	E9Q0K9;Q3V1U8;B7ZN22;Q0P556;B7ZN20;Q3TPW1	E9Q0K9;Q3V1U8;B7ZN22;Q0P556;B7ZN20	ELMO domain-containing protein 1	Elmod1	27.4981	27.7769	28.07	27.7265	27.8039	27.2652	29.0341	28.5143	28.2925	8	8	8	32.2	32.2	32.2	37.901	0	43.549	1965300000	64	1.74568	0.0394262
513	E9Q0N0;Q9Z0R4;E9Q3I5;E9Q3I4;Q9Z0R4-2;E9Q3I9;E9Q3I8;Q8C4B5;Q3TUF4;Q3U2A1;Q6NZJ5;F6U8U1;D3Z6P4;Q8CGU5;F6TCC6;Q80WF1;Q6IZF3;F6ZLP6;Q6J1S9;Q8CJ43;Q6J1T0;F6R6C8;Q8CJ55;Q8CJ54;Q8CJ62;Q9EPX6;Q8CGU2;F6ZX53	E9Q0N0;Q9Z0R4;E9Q3I5;E9Q3I4;Q9Z0R4-2;E9Q3I9;E9Q3I8	Intersectin-1	Itsn1	31.2385	31.4202	31.4594	30.9199	31.0363	31.0442	31.4568	31.5089	31.5221	67	67	40	45.4	45.4	32.1	194.89	0	323.31	14466000000	459	3.12795	0.00359553
514	E9Q0V6;B1AXH1;F6T2J3	E9Q0V6;B1AXH1	NHS-like protein 2	Nhsl2	27.3528	27.455	27.6824	26.9189	27.3753	27.2589	26.8485	26.4807	26.481	16	16	13	18.7	18.7	15.8	132.35	0	81.904	887060000	53	2.27925	0.0154044
515	E9Q166;Q8C3P6;Q571M9	E9Q166		Atad2b	25.9276	25.7099	24.8119	26.9994	26.9529	26.9946	24.3966	25.1525	25.1101	12	12	10	11.4	11.4	9.9	164.72	0	18.188	368770000	20	2.64089	0.00827265
516	E9Q171;Q6ZQ54;E9PW06;REV__A2ADM8	E9Q171;Q6ZQ54;E9PW06		Nfasc	33.0389	33.0359	33.2459	33.3534	33.4265	33.484	32.7974	32.8404	33.0675	58	58	9	49.8	49.8	8.3	130.24	0	323.31	52791000000	895	2.36791	0.0132853
517	E9QAR6;E9Q1A5;Q6P3F1;D3YX49;E9QAR4;E9QAR1;Q3U1E7;Q3T9J2;Q8C3E0;A9X427;A9X426	E9QAR6;E9Q1A5;Q6P3F1;D3YX49;E9QAR4;E9QAR1;Q3U1E7;Q3T9J2		Zfp384	26.2236	25.1089	25.9165	26.1564	26.3772	26.8013	24.9323	23.9963	25.1633	9	9	7	22.9	22.9	17.6	61.701	0	21.079	316520000	23	1.74945	0.0392434
518	E9Q1G8;Q8C2A3;E9Q9F5;Q3UNN1;Q8C752;Q3UGE0;S4R2P6;Q9DA97	E9Q1G8;Q8C2A3;E9Q9F5;Q3UNN1		2007-09-01	34.0078	33.9168	33.9717	33.4888	33.4396	33.4286	34.6887	34.8125	34.8343	31	31	1	61.6	61.6	2.7	50.648	0	323.31	105560000000	822	6.48737	3.32984e-05
519	E9Q1K0;Q3ZT31;Q7TQF4;D3Z040	E9Q1K0;Q3ZT31;Q7TQF4	Sorting nexin-25	Snx25	26.2018	25.4835	25.5057	27.0059	27.037	26.8733	26.8687	26.8913	26.7387	19	19	19	24.3	24.3	24.3	112.17	0	20.575	619460000	30	2.81287	0.00608566
520	E9Q1U6;Q6PEE2;Q6PEE2-2	E9Q1U6;Q6PEE2;Q6PEE2-2	CBP80/20-dependent translation initiation factor	Ctif	25.5323	24.8802	24.7171	26.4134	26.5212	26.1271	25.8807	26.0282	25.231	9	9	9	17.3	17.3	17.3	70.273	0	14.072	366210000	33	1.85823	0.0325428
521	E9Q247;Q6AXF6;Q6Q3F7;Q6Q3F6;Q8BZK2;Q6AXF6-2	E9Q247;Q6AXF6;Q6Q3F7;Q6Q3F6	SID1 transmembrane family member 1	Sidt1	27.0828	26.3164	26.3613	23.3843	22.9475	24.4066	26.2603	26.0426	25.8684	5	5	5	6.9	6.9	6.9	94.412	0	11.349	337660000	10	3.10713	0.00372541
522	E9Q284;Q5SU73;A6PWE1;Q3UJN9	E9Q284;Q5SU73;A6PWE1;Q3UJN9	Coilin	Coil	27.0517	27.7021	27.8192	27.4363	27.7772	27.7469	25.6118	25.7926	25.8435	8	8	8	20.1	20.1	20.1	62.262	0	46.461	801570000	47	3.64005	0.00153946
523	E9Q2E4;E9PX61;Q6PDJ9;Q6ZQ86;Q8BYX4;Q80UV2;Q6GQX8;Q8BRI0;Q8BYZ5;Q4QQN3;Q80W01;F6XXX5	E9Q2E4;E9PX61		Gm15800	29.7257	30.0117	30.1441	29.8369	29.9246	29.9904	30.3199	30.2931	30.33	79	79	78	24.6	24.6	24.4	484.12	0	323.31	6150200000	324	1.71752	0.0416076
524	H3BK39;E9Q2E5;Q3UQC2;Q8VCC8;Q8VCC8-2;Q3TES7;F7BXV7;D3Z4E9	H3BK39;E9Q2E5;Q3UQC2;Q8VCC8;Q8VCC8-2;Q3TES7	Rap guanine nucleotide exchange factor 3	Rapgef3	23.7145	22.6452	23.9926	25.9946	25.8686	25.6375	21.0356	21.8519	23.5269	8	6	6	14.4	12.6	12.6	100.12	0	6.3731	162280000	8	2.31087	0.0146037
525	E9Q2V5;Q3UTZ3;E9Q6X8	E9Q2V5;Q3UTZ3	Uncharacterized protein C7orf43 homolog	BC037034	27.7881	27.9762	28.1055	27.1543	27.5894	27.5288	28.3353	28.492	28.2911	17	17	17	43.3	43.3	43.3	62.749	0	46.127	1310900000	82	2.76665	0.00662101
526	E9Q2W8;Q9D920	E9Q2W8;Q9D920	Loss of heterozygosity 12 chromosomal region 1 protein homolog	Loh12cr1	26.6464	26.7231	27.2557	27.6108	27.3954	27.3451	27.6311	27.7862	27.7034	8	8	8	54.1	54.1	54.1	22.59	0	35.577	749510000	38	2.09718	0.0213789
527	E9Q317;Q4FZH3;O55128;D3Z2N9;D3YY73;D3YY55;REV__Q14BI5;REV__O55124	E9Q317;Q4FZH3;O55128;D3Z2N9;D3YY73	Histone deacetylase complex subunit SAP18	Gm10094;Sap18	29.8225	29.939	29.4665	30.4515	30.9549	30.9235	28.3602	28.6499	28.2833	11	11	11	61.6	61.6	61.6	19.586	0	247.92	5699900000	90	4.15975	0.000670323
528	E9Q361;E9Q360;Q8K2A7;Q8BXH8;Q3TE59	E9Q361;E9Q360;Q8K2A7;Q8BXH8	Integrator complex subunit 10	Ints10	26.0343	25.8336	26.2338	26.408	26.098	26.9977	24.2439	22.8126	23.9982	13	13	13	22.9	22.9	22.9	76.129	0	13.535	332700000	22	2.88963	0.00534858
529	E9Q3E8;Q8BGA4;Q6NXJ9;E9Q4B3;E9QAL0	E9Q3E8;Q8BGA4;Q6NXJ9;E9Q4B3;E9QAL0		Adcyap1r1	27.8625	27.4911	27.6165	28.0867	28.1889	28.1388	28.0229	27.8701	27.7715	4	4	1	10.7	10.7	3.6	51.166	0	47.133	1294800000	44	1.86955	0.0319231
530	Q80WR0;E9Q3G8;Q80UN3;Q8BRF6;Q8R2M9;Q3V3W1;Q3TA10	Q80WR0;E9Q3G8		Nup153	28.3916	27.984	28.1979	28.2875	29.1137	28.8813	26.7166	26.4189	27.3997	29	29	29	25.7	25.7	25.7	152.07	0	75.225	1716500000	90	2.55371	0.00963252
531	E9Q3H6	E9Q3H6		Coq10a	26.4631	26.6036	26.3131	27.0797	27.1602	26.8451	27.0302	26.5922	26.8757	7	7	6	28.6	28.6	24.7	28.927	0	19.308	603210000	42	1.65877	0.0461498
532	E9Q3K3;Q8BXK8;Q3UH88;Q8C418	E9Q3K3;Q8BXK8;Q3UH88	Arf-GAP with GTPase, ANK repeat and PH domain-containing protein 1	Agap1	29.7713	29.8893	30.0132	29.5006	29.4992	29.3784	29.9792	30.1079	30.2193	25	24	20	43.8	42.8	36.1	89.02	0	245.48	5233100000	214	3.06075	0.00401655
533	E9Q3L2;Q6DIC7;Q3UVT5;Q80Y45;F6Y9T6;F6XSW4;Q7TNG2;D6RJ66;F6WIX7	E9Q3L2;Q6DIC7		Pi4ka	32.3681	32.2995	32.2287	32.1277	32.0895	32.0599	32.7079	32.6878	32.6168	98	98	98	54.3	54.3	54.3	231.35	0	323.31	32179000000	931	4.51836	0.000384563
534	E9Q3Q6;Q54AJ5;Q61490;E9Q4G8;F6QH25;Q5MPX5;Q3TTY3	E9Q3Q6;Q54AJ5;Q61490;E9Q4G8	CD166 antigen	Alcam	29.9248	29.8585	29.6706	29.5588	29.6078	29.3132	30.2056	30.1789	30.267	20	20	20	44.6	44.6	44.6	63.668	0	124.63	5413100000	181	2.9863	0.00456474
535	H7BX15;E9Q3V9;E9Q9Q9;Q80TR1;Q80TR1-2;D6RI60;Q3UYB4;F6YP92	H7BX15;E9Q3V9;E9Q9Q9;Q80TR1;Q80TR1-2	Latrophilin-1	Adgrl1;Lphn1	28.3848	28.5147	28.3201	28.3466	28.3893	28.4197	29.1998	28.8687	28.8361	28	28	27	27.5	27.5	27	162.28	0	61.753	1943200000	113	2.5982	0.0088864
536	Q3THX5;E9Q3X0;Q9EQK5;Q8C2S9;Q3U7S9;D3Z2N7	Q3THX5;E9Q3X0;Q9EQK5;Q8C2S9;Q3U7S9	Major vault protein	Mvp	28.3992	28.1415	28.5747	28.8607	28.8094	28.8053	27.5756	27.3669	27.1402	23	23	23	41.1	41.1	41.1	96.757	0	75.806	1856600000	86	3.80755	0.00117735
537	E9Q3Y4;Q8C7C2;Q8BSM6;Q8CBR4	E9Q3Y4		Lrba	29.2661	29.3275	29.3059	28.2562	28.4882	28.2498	29.0379	29.049	29.0584	48	40	3	21.4	18.5	1.6	316.81	0	100.29	2643600000	139	4.80032	0.000246833
538	E9Q3Y7;E9Q5L4;Q5PR69-2;Q5PR69	E9Q3Y7;E9Q5L4;Q5PR69-2;Q5PR69	Uncharacterized protein KIAA1211	C530008M17Rik;Kiaa1211	25.244	25.1788	25.1775	24.2281	24.3337	24.5589	25.4672	25.721	25.2564	5	5	5	6.5	6.5	6.5	142.54	0	33.738	134130000	15	3.32456	0.00259446
539	E9Q3Z5;Q8K4L3;E9Q983;E3VVQ8;Q8K4L2;Q7TMJ2;Q99KQ8;Q3TTX5;F6TBK9;F6R6A4;Q7TN21;A1A5A1;Q8C9L0	E9Q3Z5;Q8K4L3;E9Q983;E3VVQ8;Q8K4L2;Q7TMJ2;Q99KQ8;Q3TTX5	Supervillin	Svil	24.8635	25.0935	24.9364	24.452	24.2879	24.2143	26.4844	26.0363	26.6464	10	10	10	5.3	5.3	5.3	230.42	0	10.792	239300000	15	4.3044	0.000535043
540	F6U7V1;E9Q401;Q80ZZ5;Q9CTT8	F6U7V1;E9Q401	Ryanodine receptor 2	Ryr2	31.4702	31.4109	31.5123	31.8128	31.7032	31.6537	31.3733	31.3672	31.4395	147	147	133	39.8	39.8	36.9	564.73	0	323.31	16882000000	762	2.91317	0.00513801
541	E9Q481;Q6P2K6;Q6P2K6-2;Q5M6W0	E9Q481;Q6P2K6	Serine/threonine-protein phosphatase 4 regulatory subunit 3A	Smek1	27.6101	27.7819	27.6193	27.9322	27.8108	27.4866	25.6008	25.1826	25.9852	15	15	10	27.3	27.3	20.8	95.313	0	103.93	799220000	62	3.9711	0.0009098
542	E9Q4D5;Q8VEL9;Q8VEL9-2;F6Z0Z5;E9PVZ0	E9Q4D5;Q8VEL9;Q8VEL9-2	GTP-binding protein REM 2	Rem2	26.6082	26.5198	26.9417	25.2408	25.6169	25.5317	26.7567	26.9869	26.9979	8	8	8	30.2	30.2	30.2	37.397	0	39.398	479910000	39	3.77387	0.0012492
543	Q19VH2;E9Q4K0;Q8BL65-5;D3Z0Y4;Q8BKD1;F6UI99;F6W6N3	Q19VH2;E9Q4K0;Q8BL65-5	Actin-binding LIM protein 2	Ablim2	30.8953	30.7593	30.7664	29.6729	30.0813	30.1115	31.4861	31.4059	31.5636	28	27	0	59.5	58.4	0	73.589	0	275.54	10737000000	319	4.21759	0.000605545
544	E9Q6R4;E9Q4N7;E9Q4N6;Q3UT39;Q6ZWS9	E9Q6R4;E9Q4N7;E9Q4N6		Arid1b	28.5229	28.5989	28.5018	28.9075	29.0716	28.8254	26.9211	26.476	26.7252	33	33	20	19.7	19.7	13.1	237.02	0	97.589	1642700000	91	5.40358	0.000105065
545	Q3URR2;E9Q5E0;Q921S6;Q63943;E9QKT0;Q63943-2;S4R2H4;Q8C895;D3Z6M5;Q3V1B5;Q8CFN5-4;Q8CFN5-2	Q3URR2;E9Q5E0;Q921S6;Q63943;E9QKT0;Q63943-2	Myocyte-specific enhancer factor 2D	Mef2d	26.7255	27.5603	27.6867	27.1979	28.4277	27.7584	24.5081	24.2381	25.1805	6	6	4	13.6	13.6	9.3	54.013	0	51.777	804240000	29	3.09742	0.00378213
546	E9Q5K9;E9Q5K9-3;E9Q5K9-2;D6RG95;Q8C4W4	E9Q5K9;E9Q5K9-3;E9Q5K9-2;D6RG95	YTH domain-containing protein 1	Ythdc1	26.4857	27.3753	27.464	27.8787	27.9453	28.381	25.8614	25.1071	26.0469	12	12	12	17	17	17	85.648	0	22.327	853540000	42	2.72504	0.00713083
547	E9Q5M4;Q80TK6;F6VRB4	E9Q5M4;Q80TK6		Zfr2;mKIAA1086	27.5409	27.3778	27.6173	27.5288	27.687	27.6544	26.3821	26.2615	26.5926	17	17	17	28.4	28.4	28.4	94.974	0	98.463	926600000	62	4.336	0.000505826
548	E9Q616;Q6UL10;A0PJF4;Q61484;A0JLR7;Q8BKS2;Q8BRB8;Q8VDN3;Q8CGE7;Q6UIL4;Q3UYW8;G5E8K8;Q8R2L7;Q8CEX7	E9Q616;Q6UL10		Ahnak	29.6252	29.6282	29.3754	28.9187	29.0361	29.0247	29.4237	29.3437	29.4906	43	43	43	30.5	30.5	30.5	604.25	0	48.036	4942500000	129	2.883	0.00539673
549	Q80TH4;E9Q624;E9QA22;Q8K0R1;E9QA24;E9QA23	Q80TH4;E9Q624;E9QA22;Q8K0R1;E9QA24;E9QA23		Zfp644	24.0996	24.3554	24.0908	25.5358	24.8316	24.4939	23.7157	24.0045	23.0228	6	6	6	5.4	5.4	5.4	139.97	0.00099432	3.2493	144660000	8	1.64635	0.0471245
550	E9Q634;Q8C123;Q3TLJ4;G3V011;Q8CG29;Q811E7;P70248;Q6KAL9	E9Q634;Q8C123	Unconventional myosin-Ie	Myo1e	25.8207	25.7192	25.717	26.7794	26.8687	26.5418	26.2404	25.8559	25.9163	11	11	11	15.4	15.4	15.4	126.82	0	28.734	441020000	24	3.16291	0.00340279
551	E9Q640;Q6NZN0-5;Q6NZN0-3;Q6NZN0-4;Q6NZN0-2;Q6NZN0;E9PYZ7;E9PUF4	E9Q640;Q6NZN0-5;Q6NZN0-3;Q6NZN0-4;Q6NZN0-2;Q6NZN0;E9PYZ7;E9PUF4	RNA-binding protein 26	Rbm26	27.7355	27.1304	27.2393	28.2859	28.3212	27.7066	26.3153	25.5185	25.5486	21	21	20	25.3	25.3	24.1	112.66	0	44.676	1150300000	63	3.0985	0.00377543
552	E9Q6C8;H3BJG3;H3BL12;E9Q6C8-2;E9Q6C8-3	E9Q6C8;H3BJG3	XK-related protein 6;XK-related protein	Xkr6	27.0451	26.4933	27.0722	26.2253	26.1566	26.4043	28.0087	27.7693	27.7193	9	9	9	18.2	18.2	18.2	70.927	0	38.364	745370000	41	3.41918	0.00223026
553	Q8C0Z3;Q8CFF2;Q8CGI3;Q9CT17;Q6NSR2;Q3UIX4;E9Q6E5;D3Z4B0;F6TN80;D6RE22;Q3TR16;Q8BYD3;B7ZNC5;Q8BV04;F6X2U6;Q5XJE4	Q8C0Z3;Q8CFF2;Q8CGI3;Q9CT17;Q6NSR2;Q3UIX4;E9Q6E5;D3Z4B0;F6TN80;D6RE22;Q3TR16;Q8BYD3		Srsf11	27.2845	27.3886	27.3518	28.2695	28.1528	28.2272	23.9745	25.1212	25.6012	6	6	6	26.9	26.9	26.9	32.703	0	30.448	1008300000	71	3.39892	0.00231402
554	E9Q6H8;Q6ZPK1;Q8CIA7;Q8VDM7;Q91YS3	E9Q6H8;Q6ZPK1;Q8CIA7		Plekha5	26.9823	27.1121	26.121	27.708	27.8037	27.3557	26.2286	25.9945	26.2553	21	21	21	20.4	20.4	20.4	144.35	0	95.852	859530000	55	2.20801	0.0175605
555	E9Q6J8;Q08274;Q5HZG7;Q8K0I9	E9Q6J8;Q08274;Q5HZG7;Q8K0I9	Dystrophia myotonica WD repeat-containing protein	Dmwd	27.3369	27.4406	27.7925	26.7175	26.5643	27.0672	27.725	28.0638	27.8348	15	15	15	30.8	30.8	30.8	67.097	0	88.817	973370000	70	2.54875	0.00970734
556	Q3UHW0;E9Q6M7;Q80U78-2;Q3U4T5;Q3TRI4;A8WHM8;Q80U78-4	Q3UHW0;E9Q6M7;Q80U78-2;Q3U4T5;Q3TRI4	Pumilio homolog 1	Pum1	27.55	27.7188	27.9187	28.0317	28.3169	27.8341	26.8189	26.7348	26.1726	14	14	1	19.4	19.4	1.6	100.29	0	60.223	1173100000	61	2.92303	0.00506499
557	E9Q6P0;Q69ZU6;E9QNR5;E9PWD2;D3YWC4;D3Z4C8	E9Q6P0;Q69ZU6;E9QNR5;E9PWD2;D3YWC4	Thrombospondin type-1 domain-containing protein 7A	Thsd7a	27.0355	27.3695	27.2339	26.3617	26.2564	25.9937	28.7196	28.7645	28.7776	27	27	26	23.1	23.1	22.7	183.65	0	53.49	1472100000	62	5.66009	7.69785e-05
558	Q8C5J7;E9Q720;Q9QZB1;D3Z4Z8	Q8C5J7;E9Q720;Q9QZB1	Regulator of G-protein signaling 20	Rgs20	24.7214	26.0651	24.9936	24.5627	25.2704	24.136	27.3283	27.1669	27.2859	5	5	5	34.6	34.6	34.6	23.881	0	12.051	357750000	25	2.64862	0.00815839
559	Q5UE59;E9Q7C9;Q7TNF4;Q8CD76;Q7M703;Q7M702;Q7M6Z8;Q7M701;Q7M6Z7;Q7M6Z9;Q7M700;Q7M6Z6;O88447;F6UYN4;D3Z710;Q91W40	Q5UE59;E9Q7C9;Q7TNF4;Q8CD76;Q7M703;Q7M702;Q7M6Z8;Q7M701;Q7M6Z7;Q7M6Z9;Q7M700;Q7M6Z6;O88447	Kinesin light chain 1	Klc1	30.4677	30.3434	29.9987	29.9201	29.7218	29.7299	30.6886	30.763	30.5052	29	23	20	60.5	48	44.1	61.629	0	275.66	7528500000	228	2.5841	0.0091159
560	E9Q7G0;Q80Y35;Q3TH77;Q91W16;Q99KG8	E9Q7G0;Q80Y35		Numa1	31.0492	31.309	31.5711	31.9695	31.9478	32.0183	29.6654	29.8626	29.8203	96	96	64	54.9	54.9	36.4	235.63	0	323.31	16318000000	448	5.05412	0.000170976
561	E9Q7P2;E0CXK2	E9Q7P2;E0CXK2		Cacna1i	23.9632	23.1092	23.8112	25.0449	25.4706	25.3004	24.0386	22.4836	23.2857	6	5	5	3.8	3.5	3.5	242.89	0	8.7104	86624000	7	2.09331	0.0215086
562	E9Q7V6;Q5D0E7;Q64338-2;Q64338-1;Q64338;Q8CDV2;Q9D5W0;Q3USZ6	E9Q7V6;Q5D0E7;Q64338-2;Q64338-1;Q64338;Q8CDV2;Q9D5W0;Q3USZ6	Calcium/calmodulin-dependent 3,5-cyclic nucleotide phosphodiesterase 1C	Pde1c	28.4926	28.7824	28.7042	27.2308	27.3333	27.4931	28.5424	28.9103	28.9177	17	17	13	31.8	31.8	25.7	70.569	0	85.682	2118600000	92	4.0881	0.000752687
563	E9Q8F1;Q3UXZ9;Q3UZ11;F7BXT3;Q3U4V8;Q921T5	E9Q8F1;Q3UXZ9;Q3UZ11	Lysine-specific demethylase 5A	Kdm5a	25.9136	24.7401	25.3097	26.1347	25.5704	25.7503	23.1395	24.3606	24.0401	11	11	10	9.9	9.9	9.1	184.85	0	14.73	202450000	14	2.04606	0.0233624
564	Q8CE98;Q3UZE5;E9Q8G4;Q60722-3;Q60722;Q91YV0;Q91XK1;Q60722-2;Q8K1X3;Q3UXQ3;V9GX46;Q3UZA4;V9GWU2;Q61286-2;Q61286;Q9CRT1;Q8BPX7;V9GXC3;Q3UZ69;E9PWE5;E9PWE2;P15806	Q8CE98;Q3UZE5;E9Q8G4;Q60722-3;Q60722;Q91YV0;Q91XK1;Q60722-2	Transcription factor 4	Tcf4	25.816	26.1772	24.3727	26.1759	27.5124	27.2022	24.0836	23.5507	25.0245	6	6	6	15.3	15.3	15.3	71.169	0	31.936	370780000	17	1.77107	0.0377959
565	E9Q8I9;E9Q8I9-2;E9Q8I9-3;Q8BIX6;Q3TZB0	E9Q8I9;E9Q8I9-2	Protein furry homolog	Fry	30.7073	30.695	30.8555	30.0707	30.2227	30.0621	30.6362	30.5112	30.3763	63	63	58	28.3	28.3	27.1	339.09	0	282.92	6491500000	393	3.03695	0.00419258
566	Q6PI88;Q923T4;E9Q8M1	Q6PI88;Q923T4;E9Q8M1		Zfp358	24.3155	24.248	24.8715	25.0706	24.81	24.7642	23.1454	24.1034	23.8989	5	5	5	13.5	13.5	13.5	50.164	0	7.5671	83080000	13	1.68162	0.0442677
567	E9Q8N8	E9Q8N8	Anion exchange protein	Slc4a4	34.3564	34.3164	34.0869	34.103	34.1964	33.8605	34.6225	34.4712	34.451	40	40	4	40.2	40.2	3	123.08	0	323.31	122590000000	1971	1.69718	0.0430454
568	E9Q8P8;A4FUR1;Q3TY60;Q3TY60-2	E9Q8P8;A4FUR1;Q3TY60;Q3TY60-2	Protein FAM131B	Fam131b	28.8426	28.7576	28.7313	28.0814	28.8666	28.7782	29.7116	30.1774	30.0641	10	10	10	34.2	34.2	34.2	38.958	0	94.758	4692600000	102	2.71578	0.00724687
569	E9Q8X9;Q80YS6;Q9CT56;Q8BV31	E9Q8X9;Q80YS6;Q9CT56;Q8BV31	Actin filament-associated protein 1	Afap1	24.6016	23.9983	24.2356	24.6676	24.4889	23.9634	25.6821	24.9837	25.4562	4	4	4	6.4	6.4	6.4	69.665	0.00015333	4.9311	156510000	15	1.84714	0.0331585
570	E9Q9G8;Q6NWV3;Q6NWV3-2;Q8C5U2;Q9ERM4	E9Q9G8;Q6NWV3;Q6NWV3-2;Q8C5U2	Intraflagellar transport protein 122 homolog	Ift122	25.5037	26.149	26.0985	24.8187	24.9046	25.0333	26.4104	26.2713	25.931	10	10	10	8.9	8.9	8.9	141.76	0	8.3166	309360000	20	2.6737	0.00780007
571	E9Q9J4;Q6ZQB6-3;Q6ZQB6;Q6ZQB6-2;Q80V47;Q8BWK5	E9Q9J4;Q6ZQB6-3;Q6ZQB6;Q6ZQB6-2;Q80V47	Inositol hexakisphosphate and diphosphoinositol-pentakisphosphate kinase 2	Ppip5k2	23.5655	24.2518	23.645	25.333	25.0038	24.5344	23.034	23.023	23.1113	8	5	5	8.5	5.2	5.2	140.37	0	10.643	95741000	10	3.00261	0.00443842
572	G3X9J6;E9Q9M1;Q3V1L4	G3X9J6;E9Q9M1;Q3V1L4	Cytosolic purine 5-nucleotidase	Nt5c2	28.9258	28.6107	28.4791	27.9766	28.0123	27.8898	28.8855	28.61	28.605	15	15	15	38.5	38.5	38.5	67.764	0	47.483	1870700000	89	2.60944	0.00873471
573	E9Q9M5;J3KMM1;Q3UJD6-2;Q3UJD6	E9Q9M5;J3KMM1;Q3UJD6-2;Q3UJD6	Ubiquitin carboxyl-terminal hydrolase;Ubiquitin carboxyl-terminal hydrolase 19	Usp19	27.6196	27.9335	28.3544	27.9959	27.9033	27.84	26.7317	27.2788	27.3903	23	23	23	26.7	26.7	26.7	143.45	0	51.38	1247300000	78	1.6162	0.0497039
574	E9Q9V3;F8VQL9;E9PY55;E9Q701;Q9WU42;F6Z4B2;Q9WU42-2;D3Z2J5;Q80ZV7	E9Q9V3;F8VQL9;E9PY55;E9Q701;Q9WU42;F6Z4B2;Q9WU42-2	Nuclear receptor corepressor 2	Ncor2	24.9986	26.9157	27.412	26.0009	26.4524	25.6082	24.2273	22.145	23.6756	7	7	7	5	5	5	253.86	0	26.247	224740000	13	1.75456	0.0389288
575	E9QAB6	E9QAB6		Ptar1	26.8827	27.2446	26.9264	26.0933	26.7179	26.0983	28.0203	27.7995	27.5661	11	11	11	31.1	31.1	31.1	48.29	0	14.174	904490000	40	2.8047	0.00617136
576	E9QAD8;A4GZ26;Q5DU25;D3Z5I6	E9QAD8;A4GZ26;Q5DU25;D3Z5I6	IQ motif and SEC7 domain-containing protein 2	Iqsec2	30.161	30.2782	30.2985	31.0395	31.1893	31.2093	29.2975	29.1992	29.0702	48	48	15	45.2	45.2	14.6	162.83	0	323.31	8305000000	315	6.09047	5.11066e-05
577	E9QAF9;B9EJ77;Q0VGY8;Q8CHA0;Q0VGY8-2;Q80YQ9;Q3UYQ1	E9QAF9;B9EJ77;Q0VGY8;Q8CHA0;Q0VGY8-2	Protein TANC1	Tanc1	28.9101	28.7435	28.8823	28.8053	28.9109	28.8173	29.5003	29.5932	29.7288	44	44	43	30.8	30.8	30.4	200.06	0	137.35	3169000000	169	4.17959	0.000644188
578	E9QAG2;Q9D4J7;Q9D4J7-2	E9QAG2;Q9D4J7;Q9D4J7-2	PHD finger protein 6	Phf6	25.5428	25.5612	25.4965	26.7648	26.5617	26.5075	25.1251	24.7193	23.0236	5	5	5	17.6	17.6	17.6	36.366	0.00044577	4.1894	288670000	19	1.87255	0.0317493
579	F6W8W7;E9QAP7;Q91WW6;Q8C0S6;G5E8Z2	F6W8W7;E9QAP7;Q91WW6		Taf4a	26.3518	26.4181	27.1073	26.616	26.9939	26.9333	25.1009	23.5428	23.638	9	9	9	24.4	24.4	24.4	73.137	0	18.891	380920000	18	2.73696	0.0069862
580	E9QAQ3;Q6ZQ82	E9QAQ3;Q6ZQ82	Rho GTPase-activating protein 26	Arhgap26	23.9199	24.2335	24.137	23.8548	24.8695	23.5488	25.359	27.0075	26.7776	29	1	0	40.6	1.8	0	85.951	0.0016559	2.7309	281630000	10	2.10268	0.0212136
581	E9QAQ5;Q5KU03;Q9WV60;Q3TB31	E9QAQ5;Q5KU03;Q9WV60	Glycogen synthase kinase-3 beta	Gsk3b	31.247	31.2547	31.4365	30.8875	30.792	30.9175	31.2592	31.5828	31.6741	25	25	16	70.9	70.9	55.9	47.989	0	226.71	15559000000	284	2.35642	0.0135261
582	E9QAS4;E9QAS5;Q5DTP7;Q6PDQ2;Q99JM0;Q8BM83;Q3U582;Q3UFM8;F6WR45;Q3ULG0;Q6IQY9	E9QAS4;E9QAS5;Q5DTP7;Q6PDQ2;Q99JM0	Chromodomain-helicase-DNA-binding protein 4	Chd4	30.3668	30.1744	30.5782	30.9053	30.8559	30.6304	28.4497	28.6144	28.6107	60	60	42	39.6	39.6	30	216.37	0	323.31	7635800000	299	5.34887	0.000115417
583	Q5M8Q0;Q3U7D2;E9QAZ2;Q9CZM2;B8JKK2	Q5M8Q0;Q3U7D2;E9QAZ2;Q9CZM2	Ribosomal protein L15;60S ribosomal protein L15	Rpl15;Gm10020	31.296	31.1829	31.3694	30.9068	31.3183	31.2709	30.584	30.4426	30.5919	13	13	13	50	50	50	24.146	0	57.127	12028000000	249	2.74067	0.00694309
584	E9QB02;Q68FL6;F6W0G8	E9QB02;Q68FL6	Methionine--tRNA ligase, cytoplasmic	Mars	30.9425	30.9146	31.162	30.373	30.578	30.4532	30.0698	30.145	30.1838	43	43	43	53.7	53.7	53.7	102.37	0	323.31	8406500000	339	3.83561	0.0011258
585	E9QK41;Q8K4G5;E9Q030;Q8K4G5-3	E9QK41;Q8K4G5;E9Q030;Q8K4G5-3	Actin-binding LIM protein 1	Ablim1	30.7898	30.56	30.4216	30.487	30.9811	30.727	31.5981	31.3422	31.2877	41	41	2	56.9	56.9	4.1	96.834	0	323.31	13497000000	411	2.26056	0.0159392
586	E9QK48;Q7TNG5;Q7TNG5-2;D3YWS2;D6RGM3	E9QK48;Q7TNG5;Q7TNG5-2;D3YWS2;D6RGM3	Echinoderm microtubule-associated protein-like 2	Eml2	28.8269	29.1631	29.3287	29.2309	29.1128	29.583	28.0322	28.4261	28.6999	23	23	23	38.2	38.2	38.2	90.791	0	150.05	3077500000	110	1.79517	0.0362629
587	E9QK89;Q5PSV9	E9QK89;Q5PSV9	Mediator of DNA damage checkpoint protein 1	Mdc1	23.9211	24.1264	25.3094	25.9522	26.0715	26.5316	23.66	23.5911	24.3685	5	5	5	4.5	4.5	4.5	184.8	0	24.059	182490000	12	2.37013	0.0132362
588	E9QKE4;Q8BMG7;Q3UEY3;Q8BMG7-2;Q8BYZ6;Q3TZV1	E9QKE4;Q8BMG7	Rab3 GTPase-activating protein non-catalytic subunit	Rab3gap2	30.1207	30.1173	30.0522	29.8758	30.0734	30.0563	30.3904	30.3852	30.4106	42	42	42	36	36	36	154.64	0	246.01	6135300000	306	3.0337	0.00421517
589	Q5BL05;E9QKE9;P53564-2;H3BLS0;H3BJ26;Q3UMF6;H3BL09;Q3V2M8;P53564-5	Q5BL05;E9QKE9;P53564-2;H3BLS0;H3BJ26	Homeobox protein cut-like	Cux1	27.3978	27.3116	25.8326	28.1574	27.8449	27.0551	25.5762	25.3976	24.3172	22	22	0	20.1	20.1	0	156.41	0	49.151	817220000	53	1.91643	0.0293994
590	E9QKG3;Q9CWH5	E9QKG3;Q9CWH5	tRNA (guanine(10)-N2)-methyltransferase homolog	Trmt11	22.9197	22.8341	23.9485	25.0755	25.139	25.6212	25.6374	25.4082	25.7873	3	3	3	10	10	10	52.938	0	7.4863	153690000	10	3.0934	0.00380629
591	E9QKG6;Q99NH0;E9Q804;Q99NH0-2;Q99NH0-3	E9QKG6;Q99NH0;E9Q804;Q99NH0-2;Q99NH0-3	Ankyrin repeat domain-containing protein 17	Ankrd17	24.8451	25.9575	24.8352	24.3432	24.1339	24.6498	22.5835	23.052	23.6335	12	4	4	8	3.5	3.5	246.62	0	12.156	115340000	6	2.22402	0.0169989
592	E9QKH8;O35927;Q3USD8;Q3US07	E9QKH8;O35927;Q3USD8	Catenin delta-2	Ctnnd2	30.4586	30.5771	30.3833	29.9242	30.3326	30.2472	30.9908	31.0615	31.2194	43	40	2	47.8	45.5	2.5	134.94	0	323.31	8729200000	285	3.06586	0.00399211
593	E9QKK8;F6Q8D3;Q9QZW0-2;Q9QZW0	E9QKK8;F6Q8D3;Q9QZW0-2;Q9QZW0	Phospholipid-transporting ATPase;Phospholipid-transporting ATPase 11C	Atp11c	26.4632	27.4943	27.3503	26.5106	26.2092	26.6199	26.2243	25.2174	25.4575	8	7	7	8.2	7.5	7.5	127.81	0	16.346	391880000	20	1.65656	0.0463251
594	E9QKR1;Q03173-4;J3QNM3;E9QKQ9;E9QLZ9;Q03173-6;Q03173-3;Q03173-5;Q03173;Q03173-2	E9QKR1;Q03173-4;J3QNM3;E9QKQ9;E9QLZ9;Q03173-6;Q03173-3;Q03173-5;Q03173	Protein enabled homolog	Enah	28.6086	28.1968	29.2037	27.9021	28.1381	28.093	29.4546	29.2869	29.4867	15	15	15	25.6	25.6	25.6	83.983	0	52.131	2389700000	97	2.32142	0.0143382
595	E9QKZ2;Q91YE6;Q4G0B8;F6TLX3;Q69ZP1	E9QKZ2;Q91YE6;Q4G0B8	Importin-9	Ipo9	30.3738	30.1996	30.3371	30.1564	29.6542	29.989	30.4812	30.5069	30.7052	29	29	11	37.7	37.7	13.4	115.95	0	323.31	6300300000	250	1.92944	0.0287666
596	E9QL53;P49025-3;P49025;F6SBR5;D3YU89;P49025-4;P49025-5;D3Z1U0	E9QL53;P49025-3;P49025;F6SBR5;D3YU89;P49025-4;P49025-5;D3Z1U0	Citron Rho-interacting kinase	Cit	28.1235	28.3593	28.3641	28.7329	28.8679	29.0228	27.8531	28.1434	28.1015	34	34	34	20.2	20.2	20.2	235.36	0	77.738	1778700000	108	2.9583	0.00479421
597	E9QL65;Q8CI04;Q3USH9	E9QL65;Q8CI04;Q3USH9	Conserved oligomeric Golgi complex subunit 3	Cog3	27.0099	27.2146	27.1627	25.9986	26.4586	26.7309	25.5272	26.0903	25.9286	15	15	15	22.9	22.9	22.9	94.144	0	13.171	493020000	42	2.40377	0.0125472
598	E9QL80;Q6A0A4;Q3UZK0;Q8R1E1;D3YUD1	E9QL80;Q6A0A4;Q3UZK0;Q8R1E1		Lpgat1	29.3223	29.8104	29.637	29.0405	29.6448	29.2904	30.591	30.3543	30.5854	17	17	4	40.8	40.8	7.8	47	0	101.4	4719800000	190	2.66959	0.00783467
599	E9QLA5;Q0GNC1-3;Q0GNC1	E9QLA5;Q0GNC1-3;Q0GNC1	Inverted formin-2	Inf2	26.4684	26.189	24.157	29.0056	28.7604	28.5555	24.628	24.9944	24.2611	20	20	20	23.1	23.1	23.1	138.36	0	68.395	1143000000	56	2.8528	0.00568501
600	E9QLB2;Q3UFF7	E9QLB2;Q3UFF7	Lysophospholipase-like protein 1	Lyplal1	28.0525	27.9276	27.6917	27.163	27.7524	27.2453	28.3231	28.1585	27.9343	9	9	9	46.9	46.9	46.9	26.34	0	27.777	1141800000	55	1.64544	0.0471783
601	E9QLL2;Q8BZ98-2;Q8BZ98;Q8BUT2;REV__D6RFP0	E9QLL2;Q8BZ98-2;Q8BZ98;Q8BUT2	Dynamin-3	Dnm3	32.5452	32.541	32.446	32.3458	32.2428	32.4297	32.7506	32.7379	32.6092	59	48	30	65.7	57.4	32.2	97.272	0	323.31	31566000000	737	2.41646	0.0122693
602	E9QM38;P55012;Q3TP36	E9QM38;P55012	Solute carrier family 12 member 2	Slc12a2	32.3271	32.2176	32.2811	32.1565	32.1355	32.2064	31.6603	31.5347	31.6189	44	43	42	39	38.5	37.6	130.67	0	323.31	23977000000	556	5.01576	0.000177824
603	E9QM77;O70305-2;O70305;O70305-3;F6U2C2;Q3UX07;F7B6X4;Q3UX51;F6V8M6	E9QM77;O70305-2;O70305;O70305-3;F6U2C2;Q3UX07	Ataxin-2	Atxn2	27.9944	28.1575	28.5864	26.7351	26.7274	26.6424	26.7634	26.8762	27.4991	12	12	12	13.6	13.6	13.6	136.46	0	43.771	982280000	42	2.83183	0.0058897
604	E9QM99;Q8BZN6;Q8BZN6-2;Q8BZN6-3;Q3T9E0	E9QM99;Q8BZN6;Q8BZN6-2;Q8BZN6-3	Dedicator of cytokinesis protein 10	Dock10	24.0646	24.45	24.0708	26.8104	26.4843	25.8696	23.1208	23.8886	24.088	16	14	1	9.8	9.1	0.6	249.57	0	50.927	250210000	21	3.28275	0.00275969
605	E9QME5;E9QP19;Q99PP7-2;Q99PP7	E9QME5;E9QP19;Q99PP7-2;Q99PP7	E3 ubiquitin-protein ligase TRIM33	Trim33	27.2151	27.36	25.8683	27.1414	27.2407	27.7478	24.9546	25.2997	24.6205	13	13	13	13.4	13.4	13.4	121.68	0	26.631	565520000	33	2.40876	0.0124402
606	E9QMK9;Q8BH86;Q8BH86-2;Q3U7K4;F7CUW7	E9QMK9;Q8BH86;Q8BH86-2;Q3U7K4	UPF0317 protein C14orf159 homolog, mitochondrial	9030617O03Rik	27.1657	27.1443	27.3737	27.6904	27.6115	27.7498	26.5722	26.5417	26.6276	15	15	15	30.8	30.8	30.8	69.921	0	24.292	699420000	44	4.85489	0.000227434
607	E9QML5;Q61464-4;Q61464;E9QKZ7;Q61464-7;Q61464-2;Q61464-5;Q3TZK9;Q3TNM0;Q3TQ35;Q3TQM2;Q61464-3;Q3UEX6;Q99LP9	E9QML5;Q61464-4;Q61464;E9QKZ7;Q61464-7;Q61464-2;Q61464-5;Q3TZK9;Q3TNM0;Q3TQ35	Zinc finger protein 638	Zfml;Znf638	28.5532	28.519	28.4948	28.8689	28.8612	28.9474	26.425	27.0817	26.3125	33	33	33	21.7	21.7	21.7	214.46	0	67.501	1916700000	90	4.27973	0.000551768
608	E9QMN5;Q8CHY6	E9QMN5;Q8CHY6	Transcriptional repressor p66 alpha	Gatad2a	26.6728	26.3715	27.1857	26.6507	26.39	26.9682	25.4616	25.6601	25.2407	15	13	13	35.1	31.4	31.4	67.461	0	41.165	498370000	41	2.39564	0.012692
609	E9QMP6;Q05512;Q3T9A3;F6ZS70;Q571J8;Q05512-2;E9Q9N6;E9PYX3;Q3U3A1;Q05512-3;Q05512-4;F7CVZ7;E9Q2J6;F6ZEX4;F7A3Q3;F7CRG8;F6UY70;E9Q8H5;E9Q2G8;E9PZ55;F6Z4Q6	E9QMP6;Q05512;Q3T9A3;F6ZS70;Q571J8;Q05512-2;E9Q9N6;E9PYX3;Q3U3A1;Q05512-3;Q05512-4	Serine/threonine-protein kinase MARK2	Mark2	29.8239	30.0291	30.2882	29.4332	29.6618	29.6426	30.5495	30.7429	30.8911	34	34	24	52.2	52.2	39.6	86.355	0	125.92	7253400000	224	3.1303	0.00358671
610	E9QMY1;Q80VX2;O54901;E9PZI9;Q05D16	E9QMY1;Q80VX2;O54901;E9PZI9;Q05D16	OX-2 membrane glycoprotein	Cd200	29.7455	29.6224	29.9544	29.1912	29.6301	29.3236	29.9874	30.0077	30.1951	9	9	9	26.8	26.8	26.8	30.292	0	36.59	4915100000	139	2.04893	0.0232453
611	E9QN14;Q812A2;Q91Z68	E9QN14;Q812A2	SLIT-ROBO Rho GTPase-activating protein 3	Srgap3	30.5415	30.3464	30.4916	29.9265	30.0417	30.0305	30.6092	30.4936	30.619	40	39	1	45.5	44.9	1.6	121.72	0	218.07	7338300000	254	3.56812	0.00173653
612	E9QN31;Q922K7;Q99KC3	E9QN31;Q922K7	Probable 28S rRNA (cytosine-C(5))-methyltransferase	Nop2	27.3035	26.7925	27.0789	26.6058	26.8918	26.9882	25.3007	25.787	25.0657	16	16	16	25.8	25.8	25.8	86.906	0	22.404	587720000	41	3.15613	0.00343293
613	E9QN44;Q8CIM3	E9QN44;Q8CIM3	D-2-hydroxyglutarate dehydrogenase, mitochondrial	D2hgdh	22.1164	24.0847	23.9871	25.8717	26.1979	26.3095	24.7015	24.4823	22.7679	3	3	3	9.7	9.7	9.7	61.072	0	9.0483	110510000	5	1.66084	0.0460036
614	Q3TQZ7;Q80W82;Q78GB8;Q8C9D4;E9QN59;Q80W81;Q80W80;Q61831-2;Q61831	Q3TQZ7;Q80W82;Q78GB8;Q8C9D4;E9QN59;Q80W81;Q80W80;Q61831-2;Q61831	Mitogen-activated protein kinase;Mitogen-activated protein kinase 10	Mapk10	29.8175	30.3918	30.4074	29.7825	29.6931	29.4495	30.7619	30.545	30.4806	18	18	6	51.2	51.2	22.7	48.003	0	104.97	6405800000	207	2.1475	0.0195841
615	E9QN99;Q8VCR7	E9QN99;Q8VCR7	Alpha/beta hydrolase domain-containing protein 14B	Abhd14b	29.135	29.281	29.1656	27.3377	27.4191	27.4883	28.7741	29.3732	29.1718	9	9	9	47.6	47.6	47.6	22.45	0	50.266	1941400000	40	4.42467	0.000446838
616	E9QNA7;Q62417-2	E9QNA7;Q62417-2	Sorbin and SH3 domain-containing protein 1	Sorbs1	29.3037	29.4256	29.5427	29.1448	28.9605	29.012	29.6885	29.5434	30.0392	22	22	0	35.4	35.4	0	82.874	0	133.27	3806300000	147	2.19398	0.0179584
617	E9QNF7;Q9CPW0;A3KMI8;Q3SYI6;Q9CPW0-2	E9QNF7;Q9CPW0	Contactin-associated protein-like 2	Cntnap2	31.2705	31.2684	31.3545	31.1205	31.2545	31.3348	31.835	31.9605	31.9929	43	43	43	42.4	42.4	42.4	148.25	0	323.31	17571000000	395	4.02286	0.000836969
618	E9QNH7;Q5CZX6;Q5XG73-2;Q5XG73-3;Q5XG73;Z4YM84;Z4YN06	E9QNH7;Q5CZX6;Q5XG73-2;Q5XG73-3;Q5XG73	Acyl-CoA-binding domain-containing protein 5	Acbd5	27.1741	27.0103	26.8653	26.0194	26.4778	25.9494	26.8767	26.9801	27.1093	9	9	9	20	20	20	56.712	0	23.879	643930000	39	2.55136	0.00966453
619	E9QNN1;O70133-2;O70133-3;Q3UR42;Q3TF92;Q05BR6	E9QNN1;O70133-2;O70133-3;Q3UR42	ATP-dependent RNA helicase A	Dhx9	33.5824	33.5362	33.438	34.1764	34.217	34.215	31.9693	32.127	31.8986	63	63	3	52.9	52.9	4	149.69	0	323.31	72162000000	1412	6.87331	1.99166e-05
620	E9QNY8;Q9JLC8-3;Q9JLC8;Q9JLC8-2;B2RRL5;D3Z3H1;B7ZWA8	E9QNY8;Q9JLC8-3;Q9JLC8;Q9JLC8-2	Sacsin	Sacs	29.0345	29.2257	29.2275	29.1448	29.1408	28.9618	29.8065	29.7893	29.873	83	83	82	21.3	21.3	21.2	520.69	0	164.94	3719400000	230	3.94605	0.000944174
621	E9QNZ5;Q5XJV6;D3Z7K7;F6TC98;F6S534;D3Z2L9	E9QNZ5;Q5XJV6	Serine/threonine-protein kinase LMTK3	Lmtk3	27.2614	27.3269	27.6598	27.8621	27.8063	28.0098	27.2464	27.4106	27.3115	17	17	17	17.6	17.6	17.6	153.77	0	40.544	1071600000	68	2.20014	0.0177817
622	E9QP00;Q6PFR5;Q3TAP5;Q3TNU2	E9QP00;Q6PFR5;Q3TAP5	Transformer-2 protein homolog alpha	Tra2a	28.8995	28.9677	29.1766	29.2889	29.696	30.0316	27.5171	27.7799	27.7079	8	8	8	30.5	30.5	30.5	32.578	0	50.458	2749100000	90	3.81039	0.00117376
623	E9QP09;S4R1Y1;Q80TT8;Q80TT8-4;Q80TT8-2;Q80TT8-3	E9QP09;S4R1Y1;Q80TT8;Q80TT8-4	Cullin-9	Cul9	26.4053	26.7424	27.2929	26.0985	25.5362	25.1676	26.7928	27.0419	27.1013	24	23	22	13	12.8	12.4	281.25	0	40.626	578130000	37	2.04273	0.0234769
624	E9QP44;Q8BZ05;Q8BYL0;F7CBI4;F6U703;E0CXD0;Q8BY88;Q3UW93	E9QP44;Q8BZ05	Arf-GAP with Rho-GAP domain, ANK repeat and PH domain-containing protein 2	Arap2	26.3305	26.7723	25.861	24.8761	24.5551	24.5296	27.1829	27.611	27.3472	18	18	18	13.9	13.9	13.9	193.42	0	23.229	507750000	42	3.93151	0.00096648
625	Q3UET8;E9QP84;G3UW74;Q6PGF3;E9QAH8	Q3UET8;E9QP84;G3UW74;Q6PGF3	Mediator of RNA polymerase II transcription subunit 16	Med16	25.7252	25.1513	25.7723	26.5082	26.3751	25.6116	23.8292	24.6049	22.9612	6	6	6	7.9	7.9	7.9	95.243	0	16.575	204200000	15	2.19525	0.0179369
626	G5E8R3;Q3T9S7;E9QPD7;Q3TCQ3;Q05920;Q3UFS6;Q62043;Q8BP54;Q80UC6;Q8CFE5	G5E8R3;Q3T9S7;E9QPD7;Q3TCQ3;Q05920;Q3UFS6;Q62043;Q8BP54	Pyruvate carboxylase;Pyruvate carboxylase, mitochondrial	Pcx;Pc	33.4565	33.5523	33.4933	33.1388	33.0552	33.1501	33.7964	33.7274	33.8049	61	61	61	62.9	62.9	62.9	129.7	0	323.31	66214000000	1229	5.08445	0.000165315
627	E9QPI5;Q6A026;Q8VDS0;Q9D337	E9QPI5;Q6A026	Sister chromatid cohesion protein PDS5 homolog A	Pds5a	28.1908	27.7505	27.8562	29.2765	28.9215	28.7141	25.9179	25.938	22.8129	32	26	26	31.4	27.4	27.4	150.22	0	119.4	1533200000	87	2.09869	0.0213308
628	Q2I0J8;Q2I0J7;E9QPU1;Q8CIZ8;Q3U017	Q2I0J8;Q2I0J7;E9QPU1;Q8CIZ8	von Willebrand factor;von Willebrand antigen 2	Vwf	25.604	25.0584	25.1839	24.6598	24.7933	25.1037	26.2915	26.2285	25.8928	8	8	8	3.3	3.3	3.3	309.14	0	17.696	286330000	26	2.73461	0.00701201
629	E9QPX1;P39061-2;P39061-1;P39061	E9QPX1;P39061-2;P39061-1;P39061	Collagen alpha-1(XVIII) chain;Endostatin	Col18a1	27.0734	27.3553	27.6151	26.7849	27.0324	27.4137	27.8404	27.8135	28.2553	12	12	11	8.7	8.7	8.3	182.29	0	64.56	1173300000	48	1.69526	0.0431795
630	E9QQ10;Q70FJ1-3;Q70FJ1-2;Q70FJ1;Z4YM71;Q99P24;H3BLL7;REV__Q7TSG6;REV__Q05DU4;REV__Q3TZQ2;REV__P26041;REV__P26043;REV__Q3UJJ8;REV__Q3TH46;REV__Q3U111	E9QQ10;Q70FJ1-3;Q70FJ1-2;Q70FJ1	A-kinase anchor protein 9	Akap9	27.3339	27.4369	27.618	27.1656	27.309	27.1072	28.2114	28.7615	27.692	21	21	21	7.2	7.2	7.2	434.13	0	26.282	1304100000	38	1.69887	0.0429199
631	F1DFN1;Q5DTL9;G3F8Y8;J7H264;R4H243;G3F8Z0;I6VS12;Q9JL09	F1DFN1;Q5DTL9;G3F8Y8;J7H264;R4H243;G3F8Z0;I6VS12	Anion exchange protein;Sodium-driven chloride bicarbonate exchanger	Slc4a10	31.8325	31.5788	31.6619	30.3572	30.4576	30.4534	32.2526	31.9363	32.0402	36	35	1	33.4	32.6	1	127.88	0	323.31	17916000000	457	5.09389	0.000164277
632	Q8K3L3;F2Z3X6;Q810Z4;Q9Z2A0;Q3UHZ0;Q3TRL2;Q3UGN6;F2Z3Z9;Q3UEW8;F2Z400;F2Z4A5;F2Z3V6;F2Z3X9	Q8K3L3;F2Z3X6;Q810Z4;Q9Z2A0;Q3UHZ0;Q3TRL2;Q3UGN6;F2Z3Z9;Q3UEW8;F2Z400	3-phosphoinositide-dependent protein kinase 1	Pdpk1	28.675	28.9332	28.8788	28.4286	28.4104	28.4383	28.9146	29.1379	29.1087	23	23	23	49.8	49.8	49.8	60.934	0	100.42	2330700000	105	3.01015	0.00437995
633	F2Z4A3;Q9QXA3;Q80XT9;Q497H5;Q80VA2;Q6X4A1;A7ISQ2;A7ISQ0;A7ISQ1	F2Z4A3;Q9QXA3		Fat1	28.5321	28.933	28.736	27.3941	27.4815	27.3827	29.2232	29.4208	29.3491	57	57	56	16.9	16.9	16.7	506.26	0	93.293	2162300000	110	5.22123	0.000138008
634	F2Z4A9;H3BLH0;Q6DIC0;Q3UHL2;E9QAB8;H3BJK2;Q7TND4;Q3UX55;Q8R1W7;Q9CTU8;H3BLI4;H3BK47;H3BJI1;Q9D007;H3BKJ3;H3BJM2;H3BKD2;O35846;H3BKN5;REV__Q9QZS8-2;REV__Q9QZS8	F2Z4A9;H3BLH0;Q6DIC0;Q3UHL2;E9QAB8;H3BJK2;Q7TND4	Probable global transcription activator SNF2L2	Smarca2	30.2705	30.2836	30.3649	31.1928	31.1358	30.9682	28.7767	28.5193	28.2906	45	45	29	33.5	33.5	22.4	180.72	0	278.94	7807300000	276	5.53399	9.20281e-05
635	J9T120;F6M2J8;J9S314;J9SUA7;J9S2Y6;J9T143;J9SQE7;F4YJQ0;J9SQF3;J9SQF8;J9SVL3;J9T334;F4YJP8;F4YJP9;J9S305;F4YJQ1;J9S2Z5;J9T153;J9T345;F4YJQ2;Q3UQF1;B2RUS0;J9SQG4;J9SUB2;Q8BJ11;Q8BIH6;E9PUC8;Q8BJE6;Q8BKI1;Q8BKH4;D3Z539;H3BL00;Q2TV84-5;Q2TV84-4;Q2TV84-3	J9T120;F6M2J8;J9S314;J9SUA7;J9S2Y6;J9T143;J9SQE7;F4YJQ0;J9SQF3;J9SQF8;J9SVL3;J9T334;F4YJP8;F4YJP9;J9S305;F4YJQ1;J9S2Z5;J9T153;J9T345;F4YJQ2;Q3UQF1;B2RUS0;J9SQG4;J9SUB2;Q8BJ11		Trpm3	29.6936	29.6992	29.8377	29.7834	29.657	29.7353	30.0765	29.9037	30.0945	46	46	1	33.5	33.5	0.7	193.06	0	215.95	5272200000	219	2.06456	0.0225761
636	F6QCI0;Q3TLE4;Q8BQ46	F6QCI0;Q3TLE4;Q8BQ46		Taf15	26.8866	27.4894	26.5966	26.1367	27.2542	27.0711	25.0597	25.518	25.558	6	4	4	19.8	15.4	15.4	33.603	0	8.4909	668590000	15	2.00488	0.0251957
637	F6QKD2;Q4VBG1;Q9CWX9;Q3TEK1;Q922S6;D3YWF9	F6QKD2;Q4VBG1;Q9CWX9	Probable ATP-dependent RNA helicase DDX47	Ddx47	27.3794	26.7759	26.6729	27.7009	26.93	27.5223	24.9997	24.7427	25.8201	10	10	10	40.6	40.6	40.6	39.913	0	15.456	580580000	28	2.62175	0.0085649
638	F6QM56;Q8BP56-2;Q8BP56;Q8BP56-3;E9Q4H7;E9QA85	F6QM56;Q8BP56-2;Q8BP56;Q8BP56-3;E9Q4H7	Acid trehalase-like protein 1	Athl1	23.5112	24.0226	24.106	24.0941	23.7958	24.8114	25.2868	25.5319	25.0628	5	5	5	11.9	11.9	11.9	69.212	0	9.9398	165420000	18	2.03444	0.0238536
639	F6RHI8;Q9CS84-3;Q9CS84-2;Q9CS84;E0CZA5;E0CY11;Q9CS84-5;Q9CS84-4;H3BK41;H3BK93;G3UWQ9	F6RHI8;Q9CS84-3;Q9CS84-2;Q9CS84;E0CZA5;E0CY11;Q9CS84-5;Q9CS84-4	Neurexin-1	Nrxn1	30.4027	30.3319	30.7221	29.8514	29.9974	29.7889	31.4615	31.5987	31.5575	42	42	26	36.4	36.4	24.3	164.37	0	323.31	10704000000	322	4.68725	0.00029113
640	F6RJV6;Q9JJK2	F6RJV6;Q9JJK2	LanC-like protein 2	Lancl2	31.1856	31.2156	31.5182	31.0329	30.9467	31.1907	31.6427	31.8168	31.8185	22	22	22	59.6	59.6	59.6	49.742	0	323.31	16830000000	420	2.60939	0.00872625
641	F6RPJ9;Q8CGB9;Q9JHR7;Q8CE37	F6RPJ9;Q8CGB9;Q9JHR7	Insulin-degrading enzyme	Ide	29.6396	29.6927	29.314	29.2527	29.0822	29.03	29.7829	29.7571	29.9262	37	37	36	40.6	40.6	40	114.15	0	96.268	4495000000	196	2.5072	0.0104679
642	F6RT34;P04370-4;F6VME3;P04370-13;P04370-5;Q09J72;P04370-14	F6RT34;P04370-4;F6VME3;P04370-13;P04370-5;Q09J72;P04370-14	Myelin basic protein	Mbp	35.9567	35.9082	36.1756	36.9713	37.0904	37.7154	33.072	33.5457	33.7028	26	26	0	67.5	67.5	0	23.086	0	323.31	686750000000	4235	4.82329	0.000235804
643	F6SEU4;J3QQ18;D3Z6Z7;Q6KAS9;Q8C2K5;Q8C2K5-2	F6SEU4;J3QQ18	Ras/Rap GTPase-activating protein SynGAP	Syngap1	29.7148	29.2762	29.6754	29.1755	29.2388	28.8492	30.2594	30.1693	30.0721	45	45	41	43.4	43.4	41.4	148.24	0	173.1	4321400000	204	2.84646	0.00574732
644	F6SLR4;Q9ER58;Q80U51;Q6PAN0	F6SLR4;Q9ER58;Q80U51;Q6PAN0	Testican-2	Spock2	27.771	27.7938	28.2624	27.3278	27.2144	27.285	27.8443	27.7874	27.8331	11	11	11	31.2	31.2	31.2	46.859	0	45.063	1450000000	62	2.25979	0.0159602
645	F6TP58;E9PVD3;F6PYJ6	F6TP58;E9PVD3;F6PYJ6	Protocadherin-16	Dchs1	24.9008	25.2793	25.814	26.5075	26.4171	27.1308	26.3997	26.0089	25.9214	8	8	8	4.9	4.9	4.9	271.64	0	8.7841	522420000	11	1.88439	0.0310639
646	F7D6H8;F6U329;Q9WTU3-5;Q9WTU3;Q9WTU3-3;F7D6J5;Q9WTU3-2;F7D6K4;Q9WTU3-4;Q4KL32	F7D6H8;F6U329;Q9WTU3-5;Q9WTU3;Q9WTU3-3;F7D6J5;Q9WTU3-2;F7D6K4;Q9WTU3-4	Sodium channel protein;Sodium channel protein type 8 subunit alpha	Scn8a	26.7128	27.0623	27.3823	27.6661	28.1296	28.0844	26.7543	26.8229	26.6239	27	18	18	17	13	13	225.15	0	53.716	934850000	53	2.62038	0.00857787
647	F6VF29;Q91VL0;Q9D632;G5E8U9;Q3TTX3;Q3TWC8;O54940	F6VF29;Q91VL0;Q9D632;G5E8U9;Q3TTX3;Q3TWC8;O54940	BCL2/adenovirus E1B 19 kDa protein-interacting protein 2	Bnip2	26.2973	25.9698	24.2078	24.5186	24.9508	23.8111	28.2701	28.545	27.0313	3	2	2	29.1	15.1	15.1	10.18	0	8.8954	481540000	20	2.18778	0.0181542
648	F6WDS8;Q9Z2H2;B1B1E4;Q3UTM5;Q8BRK0	F6WDS8;Q9Z2H2;B1B1E4;Q3UTM5	Regulator of G-protein signaling 6	Rgs6	30.0347	30.427	30.2854	30.741	31.029	30.9266	29.0027	29.0849	29.0377	25	25	22	64.3	64.3	57.5	52.915	0	159.9	7410200000	166	4.91973	0.000207236
649	F6XYI9;Q6RI65;P29037;Q91YM5;A2T4N7;F8WJ67;Z4YMT0;B7ZMZ6;Q6SJ95	F6XYI9;Q6RI65;P29037;Q91YM5	TATA-box-binding protein	Tbp	26.0741	26.5942	25.1678	25.9933	26.4972	26.1835	22.0699	24.2317	23.0074	5	5	5	30.3	30.3	30.3	23.456	0	6.8601	292210000	11	2.35226	0.0136307
650	F6Y616;Q8VE62;D3Z3J6;G3UYE5;G3UZS6;G3UZH8;G3UZ67	F6Y616;Q8VE62;D3Z3J6;G3UYE5	Polyadenylate-binding protein-interacting protein 1	Paip1	29.1537	29.2544	28.8924	28.8008	28.735	28.5319	29.3801	29.451	29.0868	13	13	13	30.4	30.4	30.4	53.963	0	65.826	3225800000	109	1.87606	0.0315167
651	F7A0B0;P04370-9;F6ZIA4;P04370-7	F7A0B0;P04370-9;F6ZIA4;P04370-7	Myelin basic protein	Mbp	25.8348	25.6318	23.6796	27.5794	28.8348	29.1595	23.704	24.0087	24.1322	25	1	1	71.4	7.1	7.1	21.239	0	58.533	1520800000	14	2.85117	0.00570292
652	F7BGR7;B7ZN14;Q8C7Q4;B0LM42;A1L3S3;J3QPA9;F6TBN8;J3QN51;J3QPT3;Q5CZX8;S4R1A6;Q3TY21;Q8C7Q4-2;Q61954;J3QQ01	F7BGR7;B7ZN14;Q8C7Q4;B0LM42;A1L3S3;J3QPA9;F6TBN8	RNA-binding protein 4	Gm21992;Rbm4	26.9763	27.127	26.5501	27.3249	27.8522	27.533	26.0816	26.1512	26.174	22	14	3	60	40	15.1	52.791	0	45.613	826320000	48	3.06481	0.00399892
653	F7BQE4;Q8C033-2;Q8C033;Q3UGZ6;F7BCP8	F7BQE4;Q8C033-2;Q8C033;Q3UGZ6	Rho guanine nucleotide exchange factor 10	Arhgef10	25.8509	26.2365	25.1817	27.4611	27.3536	27.249	27.4793	26.8141	27.0302	17	16	16	21.5	21.5	21.5	109.41	0	44.121	691480000	55	2.41861	0.0122206
654	Q3UH37;F7BX42;Q3UH69;B9EIV5;Q99J85;Q6TLW2;Q6PD36	Q3UH37;F7BX42;Q3UH69;B9EIV5;Q99J85;Q6TLW2;Q6PD36	Neuronal pentraxin receptor	Nptxr	26.1978	25.9875	25.4537	25.6889	25.9414	25.5361	26.4051	26.8864	26.5432	11	5	5	46.1	21.4	21.4	51.22	0	26.96	453960000	25	1.704	0.0425561
655	F7CZ64;Q8VHW2	F7CZ64;Q8VHW2	Voltage-dependent calcium channel gamma subunit;Voltage-dependent calcium channel gamma-8 subunit	Cacng8	26.573	26.4015	26.8214	25.6946	26.4731	25.9777	27.3241	27.2739	27.5207	6	6	6	23.6	23.6	23.6	43.418	0	20.963	528590000	35	2.55813	0.00957025
656	F7D291;F6S054	F7D291;F6S054		Mtss1l	26.4683	26.7099	26.7895	25.3378	25.0185	25.7813	26.8081	26.8356	26.5083	8	3	3	34.9	11.8	11.8	39.01	0	15.084	476380000	13	2.89735	0.00526772
657	F7DBB3;Q3URZ6	F7DBB3		Ahnak2	26.2696	25.2713	25.3719	29.6299	29.5301	29.8396	25.1476	24.1307	23.4901	12	12	4	24.9	24.9	3.6	166.49	0	80.383	1856500000	54	4.14681	0.000688549
658	F7DD14;P05532-2;P05532;Q3ULJ6;A4ZVL1;P05532-3;Q8VHX3	F7DD14;P05532-2;P05532;Q3ULJ6	Tyrosine-protein kinase receptor;Mast/stem cell growth factor receptor Kit;Receptor protein-tyrosine kinase	Kit	30.2216	29.856	29.8455	28.8446	28.7948	28.6423	30.6791	30.5713	30.4673	24	24	22	26.2	26.2	24.5	110.16	0	68.066	5082500000	160	4.7566	0.000264169
659	F8SLP9;F8SLQ5;F8SLP7;F8SLP8;F8SLQ3;F8SLQ4;F8SLP6;F8SLP5;F8SLQ1;Q8C437;Q8C437-3	F8SLP9;F8SLQ5;F8SLP7;F8SLP8;F8SLQ3;F8SLQ4;F8SLP6;F8SLP5;F8SLQ1;Q8C437;Q8C437-3	PEX5-related protein	Pex5l	28.2467	28.8567	29.0676	29.9556	30.1507	30.5047	26.7296	26.7633	25.4557	20	20	1	54.1	54.1	3	63.138	0	323.31	3999400000	117	3.54325	0.00180522
660	F8VPK0;Q6ZQC8;Q3UYZ5;B2X2D9	F8VPK0;Q6ZQC8		Ttc37	28.3738	28.3593	28.368	28.3073	28.4673	28.2326	28.8978	28.7862	28.8923	32	32	32	31.7	31.7	31.7	173.94	0	111.62	1862100000	122	3.53267	0.00183736
661	F8VPK5;P70336;P70336-2;Q6A035;Q3UMT5;Q8CC95;Q3TR46;Q3UEZ9	F8VPK5;P70336;P70336-2;Q6A035;Q3UMT5	Rho-associated protein kinase;Rho-associated protein kinase 2	Rock2	30.8696	30.7653	30.7196	29.9724	30.0368	29.7509	31.2011	31.284	31.167	55	54	45	43.2	42.7	36.5	160.61	0	323.31	11397000000	368	4.86593	0.000224522
662	V9GXH3;F8VPM7;Q99MI1;V9GXF0;V9GXP8;V9GX53;Q99MI1-4;V9GXL1	V9GXH3;F8VPM7;Q99MI1;V9GXF0;V9GXP8;V9GX53	ELKS/Rab6-interacting/CAST family member 1	Erc1	30.9602	30.8019	30.687	29.3629	29.5886	29.2795	32.1776	32.1541	31.9988	56	56	2	46.5	46.5	2.9	113.97	0	323.31	17302000000	397	6.03342	5.51016e-05
663	F8VPN4;F6XXE6;E0CYU6;Q8CE68;E0CX86;F7CSZ6	F8VPN4;F6XXE6		Agl	31.3898	31.5006	31.6228	31.2319	31.2671	31.2066	31.9489	31.7902	31.9317	76	76	76	59.8	59.8	59.8	174.29	0	323.31	16944000000	608	3.59007	0.00168061
664	Q8QZV8;F8VPR5;P45481;Q6GQV9	Q8QZV8;F8VPR5;P45481;Q6GQV9	CREB-binding protein	Crebbp	26.0734	26.6414	26.5842	27.7289	27.4943	27.6856	24.515	24.6476	26.1086	16	16	8	7.9	7.9	4.1	264.22	0	25.764	512170000	28	2.42563	0.012084
665	F8VPV3;Q62520;Q8BQC1;Q8C8J4;G3UYE7;Q61467	F8VPV3;Q62520;Q8BQC1	Zinc finger protein ZIC 2	Zic2	28.5063	28.5712	28.5338	28.8012	28.8546	28.4363	25.9702	26.8387	26.9181	7	7	4	17	17	11	54.856	0	26.966	1553900000	55	3.41126	0.00225917
666	F8VPX1;Q6A4J8;E9PXY8;Q6A4J8-3;Q6A4J8-2;G3UWR8;Q3THF6;E0CY04	F8VPX1;Q6A4J8;E9PXY8;Q6A4J8-3;Q6A4J8-2	Ubiquitin carboxyl-terminal hydrolase;Ubiquitin carboxyl-terminal hydrolase 7	Usp7	30.3215	30.0625	30.3019	30.1353	30.2597	30.1624	29.6685	29.7084	29.8521	43	43	43	43.8	43.8	43.8	128.47	0	138.9	5990700000	219	2.59077	0.00901064
667	F8VPY2;Q8C092	F8VPY2;Q8C092	Transcription initiation factor TFIID subunit 5	Taf5	25.5399	24.5447	24.1335	25.1354	25.8948	25.2752	23.087	23.1815	22.2955	4	4	4	7.1	7.1	7.1	86.951	0	17.12	126910000	10	2.49642	0.010638
668	F8VPZ3;Q6PD17;G3UZF4;Q7TT84;F6XDW8	F8VPZ3	Ubiquitin carboxyl-terminal hydrolase	Usp32	26.6951	26.4569	27.0868	26.5828	26.4963	26.5088	27.7494	27.9178	27.5122	16	16	16	12	12	12	181.73	0	41.111	818400000	48	2.92296	0.00506254
669	F8VQ05;Q80XD5;Q8CHD0;Q8BIA1;F6Q1V8;Q99KZ2;Q80UX7;Q9CS05;F6SDM9	F8VQ05		Fryl	27.7948	27.5371	27.493	27.9912	27.8017	28.0171	27.9424	27.9475	27.9577	36	31	31	14.8	13.6	13.6	337.82	0	49.81	1260500000	89	1.7291	0.0407284
670	F8VQ40;P19137	F8VQ40;P19137	Laminin subunit alpha-1	Lama1	29.5904	29.6275	29.9481	29.3509	29.3181	29.2481	29.6919	29.803	29.9232	52	51	50	22.2	22	21.8	338.14	0	127.7	4148400000	194	2.07806	0.0220708
671	F8VQ93;Q8VDD9;Q05BL7;Q8BSJ8;Q05CQ5;Q3UW86;Q8BRF9;Q32NY1	F8VQ93;Q8VDD9;Q05BL7;Q8BSJ8	PH-interacting protein	Phip	28.4434	28.7516	28.7632	29.5423	29.6457	29.4466	26.5904	27.1315	25.9432	36	36	33	27.6	27.6	25.8	206.72	0	143.47	2541600000	106	3.82335	0.00114455
672	F8VQ95;Q6Y685;Q6Y685-2;Q3UUD7	F8VQ95;Q6Y685;Q6Y685-2	Transforming acidic coiled-coil-containing protein 1	Tacc1	26.2132	26.5248	25.7371	25.6856	25.8646	26.3424	26.8785	27.0081	26.8274	11	11	8	14.6	14.6	11	84.253	0	15.678	569650000	23	1.67934	0.0444145
673	F8VQB6;F8VQB6-2;D3YXU7;E9Q5G1;Q80TR9;D3YZ13;D3YXW4;F6UVU0;D3Z2P4;D3Z2E0;D3Z0V4	F8VQB6;F8VQB6-2;D3YXU7;E9Q5G1;Q80TR9	Unconventional myosin-X	Myo10	26.4822	26.7015	26.4025	25.493	24.7743	25.4649	27.7387	27.7113	27.4683	18	18	18	12.2	12.2	12.2	237.32	0	37.34	588920000	34	3.98816	0.000887462
674	F8VQC1;Q3UZL8;A0JLN1;A0PJ97;Q3UU23	F8VQC1;Q3UZL8;A0JLN1;A0PJ97	Signal recognition particle subunit SRP72	Srp72	29.3801	29.262	29.4762	28.8894	29.2125	29.0066	28.773	28.7429	28.6474	21	21	1	43.4	43.4	1.9	74.656	0	154.63	3057200000	101	2.78576	0.00637744
675	F8VQC7;Q61595-6;Q61595-9;Q61595-5;Q61595-15;Q61595;Q6A0E9	F8VQC7;Q61595-6;Q61595-9;Q61595-5;Q61595-15;Q61595	Kinectin	Ktn1	30.055	30.2942	30.1535	30.0321	30.0458	29.7847	29.2355	29.1519	29.6233	41	41	3	38.4	38.4	3.4	152.54	0	323.31	6529600000	209	2.46312	0.0113127
676	F8VQE9;Q8VHH5;Q8VHH5-2;Q8BV81;Q8K0K1	F8VQE9;Q8VHH5;Q8VHH5-2;Q8BV81	Arf-GAP with GTPase, ANK repeat and PH domain-containing protein 3	Agap3	29.9477	30.0737	30.1699	29.1419	29.4086	29.454	30.1278	30.2752	30.3989	18	14	14	24.3	18.4	18.4	97.694	0	213.24	5459700000	155	3.35854	0.002461
677	F8VQF9;Q3TLI0	F8VQF9;Q3TLI0	Trafficking protein particle complex subunit 10	Trappc10	28.7032	28.8288	28.292	28.3838	28.2411	28.2445	29.1503	29.1046	28.8248	25	25	25	23.9	23.9	23.9	141.49	0	179.19	2345800000	104	1.96413	0.0269815
678	F8VQH0;Q4JIM5;B7ZMZ2;B2RQ57;Q61055;Q99P28;Q3V2W1;Q3TM13;G3UWQ2	F8VQH0;Q4JIM5;B7ZMZ2;B2RQ57	Non-specific protein-tyrosine kinase;Abelson tyrosine-protein kinase 2	Abl2	26.3851	26.0473	25.9361	25.6513	26.0262	24.3326	27.2575	27.1205	27.0311	14	14	11	14.2	14.2	11.7	128.22	0	55.48	625240000	31	1.75405	0.0389618
679	F8VQN6;Q8R4H2;Q9D7D6	F8VQN6;Q8R4H2	Rho guanine nucleotide exchange factor 12	Arhgef12	29.4458	29.8039	30.0152	29.0458	29.2463	29.4032	29.7425	29.9021	29.8088	37	37	36	25.3	25.3	24.9	172.47	0	122.02	4129200000	173	1.65386	0.0464795
680	S4R255;F8WGF2;Q9Z0J4;Q9Z0J4-5;Q9Z0J4-2;Q9Z0J4-3;Q9Z0J4-4;Q8CJ25;Q9JJ30;S4R1D5;P29477	S4R255;F8WGF2;Q9Z0J4;Q9Z0J4-5;Q9Z0J4-2;Q9Z0J4-3;Q9Z0J4-4	Nitric oxide synthase;Nitric oxide synthase, brain	Nos1	29.9893	30.1795	30.2953	30.6759	30.6462	30.6699	31.6843	31.8476	31.8721	56	56	55	43.7	43.7	43.2	160.05	0	323.31	13226000000	442	5.39256	0.000106897
681	F8WGT1;Q68FL4;Q80TQ9;F8WI65;H3BKT5;A0PJF2;Q80WX1;Q3TSQ0;Q3TMT7;E9PX77;Q3UY76;D3YX97;Q9JJF5	F8WGT1;Q68FL4;Q80TQ9;F8WI65;H3BKT5	Adenosylhomocysteinase;Putative adenosylhomocysteinase 3	Ahcyl2	31.3936	30.983	30.5855	30.8475	30.3763	30.4364	31.9648	31.6068	31.3934	38	23	6	60.9	42.5	9	66.771	0	323.31	14783000000	272	1.79207	0.0364592
682	F8WGT2;Q8BRG8-2;Q8BRG8;Q8BRG8-3;Q8C214;D3YZT2	F8WGT2;Q8BRG8-2;Q8BRG8;Q8BRG8-3;Q8C214	Transmembrane protein 209	Tmem209	27.069	27.5918	27.4866	28.7475	28.3241	28.3715	26.4681	26.271	26.4856	10	10	10	38.7	38.7	38.7	58.271	0	48.258	1129400000	39	4.10376	0.000734313
683	F8WGW3;Q497V5;Q497V5-2;Q8CHZ0;B7ZWI7;B7ZWI4	F8WGW3;Q497V5;Q497V5-2	S1 RNA-binding domain-containing protein 1	Srbd1	25.5323	25.471	25.7443	25.9521	25.7983	26.4672	25.2576	24.8372	24.9608	11	11	11	14.6	14.6	14.6	110.19	0	16.12	304820000	24	2.1954	0.0179381
684	F8WGX5;Q6PNC0;Q3UUU7	F8WGX5;Q6PNC0	DmX-like protein 1	Dmxl1	29.1869	29.4122	29.6166	29.1163	29.1331	28.9425	29.7717	29.7414	29.7536	53	50	50	25.5	24.7	24.7	337.39	0	173.11	3338700000	184	2.57729	0.00923541
685	Q3UHH0;Q3UHJ3;F8WHB1;Q9R0K7;D5L240	Q3UHH0;Q3UHJ3;F8WHB1;Q9R0K7;D5L240	Calcium-transporting ATPase;Plasma membrane calcium-transporting ATPase 2	Atp2b2	31.1663	30.7923	30.0553	30.005	30.2288	29.211	32.2178	31.6216	31.4309	66	5	4	51.6	6.4	5.4	132.1	0	129.31	14024000000	135	2.00792	0.0250688
686	F8WHK3;Q7TPG1;Q7TPG2;Q8CA95-4;Q8CA95-2;Q8CA95;Q8CA95-3;D3YZR4;S4R197	F8WHK3;Q7TPG1;Q7TPG2;Q8CA95-4;Q8CA95-2;Q8CA95;Q8CA95-3;D3YZR4	cAMP and cAMP-inhibited cGMP 3,5-cyclic phosphodiesterase 10A	Pde10a;Pde10a Mus musculus	26.7074	26.5747	26.0863	26.908	26.573	26.478	26.0508	25.7606	25.6378	13	13	13	26.8	26.8	26.8	81.219	0	11.309	506840000	29	1.74862	0.039279
687	F8WHM5;Q53WR6;Q61543;F6RSH1;Q8BQH1;E9PWD8;Q3TMG0	F8WHM5;Q53WR6;Q61543	Golgi apparatus protein 1	Glg1	30.9986	30.7958	30.6103	31.4532	31.6702	31.0955	29.8766	30.0854	29.739	55	55	55	56.8	56.8	56.8	132.35	0	255.03	12308000000	326	3.27068	0.00281918
688	F8WHU5;Q4VA53;Q4VA53-3;Q4VA53-2	F8WHU5;Q4VA53;Q4VA53-3;Q4VA53-2	Sister chromatid cohesion protein PDS5 homolog B	Pds5b	30.8155	30.7135	30.9389	31.1064	31.4488	31.2393	28.9279	28.6779	28.8693	53	53	47	37.5	37.5	33.8	164.76	0	292.59	8822900000	297	5.80345	6.72721e-05
689	F8WHU7;Q9D3E6;F6XQW1;Q8C818;D6REF2;F6TNY1;D6RHQ7;Q8C918;D3Z1T1;D6RH50	F8WHU7;Q9D3E6;F6XQW1	Cohesin subunit SA-1	Stag1	28.8421	28.9529	28.844	29.533	29.2946	29.4072	26.3606	26.7711	25.7773	33	33	28	33	33	29.6	140.13	0	120.72	2835000000	126	4.51461	0.000387142
690	F8WHW6;O70161;O70161-3;O70161-2;F7C0X9;E0CYP4;F6SMP3	F8WHW6;O70161;O70161-3;O70161-2	Phosphatidylinositol 4-phosphate 5-kinase type-1 gamma	Pip5k1c	31.5155	31.2918	31.3597	30.6154	30.8337	30.7384	31.7157	31.8285	31.6563	24	24	21	41.9	41.9	37.7	75.515	0	323.31	14019000000	333	4.18531	0.000639567
691	F8WI18;P70182;P70182-3;D3YUY3;P70182-2	F8WI18;P70182;P70182-3;D3YUY3;P70182-2	Phosphatidylinositol 4-phosphate 5-kinase type-1 alpha	Pip5k1a	26.1044	26.2144	25.6604	25.1806	25.2412	24.9115	26.1809	26.0347	26.1052	10	7	7	23.7	18.3	18.3	60.413	0	16.689	364100000	27	2.75637	0.00675163
692	F8WIE1;Q8BWY6;Q3ZCX9;Q91W89;E9PZ88;E9PYM7;Q3TBQ3;Q80XU4;Q3TAW2;F6U7S0;F6TFL1;E0CYW2;Q9CTD5;E0CZB0;E0CXM6;E0CXI0	F8WIE1;Q8BWY6;Q3ZCX9;Q91W89;E9PZ88;E9PYM7;Q3TBQ3	Alpha-mannosidase;Alpha-mannosidase 2C1	Man2c1	28.7842	29.0152	29.2806	28.4672	28.792	28.6277	29.1652	29.252	29.2206	25	25	25	31.4	31.4	31.4	115.45	0	127.17	2436900000	129	1.79416	0.0363218
693	Q6NXV2;Q3U9N0;Q3U689;Q3TWZ6;Q3TWV2;Q3TLV0;Q3UDQ8;F8WIJ0;Q9JIS8;Q3TPD4;Q3TJM8;Q3TJG5;F6TQE2;Q920I2;Q9QY65;Q9QY75	Q6NXV2;Q3U9N0;Q3U689;Q3TWZ6;Q3TWV2;Q3TLV0;Q3UDQ8;F8WIJ0;Q9JIS8;Q3TPD4;Q3TJM8;Q3TJG5	Solute carrier family 12 member 4	Slc12a4	28.2644	28.0019	27.7249	26.607	26.733	26.4959	28.5892	28.5009	28.2035	21	13	13	22.3	15.9	15.9	120.68	0	53.797	1277500000	66	4.03967	0.000813973
694	F8WIZ7;Q5DTM2;Q8BXC3	F8WIZ7;Q5DTM2	Oxysterol-binding protein	Osbpl6	28.8747	28.9941	28.9228	29.1347	28.7162	29.0504	29.3214	29.2527	29.4597	31	31	1	43.1	43.1	1.1	109.72	0	160.8	3832000000	150	1.62266	0.0491241
695	F8WJ31;Q5RJ54-2;Q5RJ54	F8WJ31;Q5RJ54-2;Q5RJ54	Zinc finger and SCAN domain-containing protein 26	Zscan26	24.6817	25.2402	25.1663	25.6416	25.8537	25.7636	23.9924	24.0624	23.3331	5	5	5	14.7	14.7	14.7	38.814	0	8.2706	144960000	20	3.24533	0.00294606
696	Q8K2V2;F8WJ98;Q69ZZ6;Q69ZZ6-2;Q69ZZ6-3;Q8CB64;G3UZD9	Q8K2V2;F8WJ98;Q69ZZ6;Q69ZZ6-2;Q69ZZ6-3	Transmembrane and coiled-coil domains protein 1	Tmcc1	25.5656	25.8081	25.4119	27.5838	27.2334	26.8589	26.8603	26.5986	26.3834	12	10	4	20.5	18.3	5.7	76.053	0	33.149	683790000	30	2.98809	0.00455514
697	F8WJD4;Q80X82;Q3U2V0;Q3U2B5;Q3TN10;Q3TA76;S4R2Q3;D3Z2M2;F6UJ99	F8WJD4;Q80X82;Q3U2V0;Q3U2B5;Q3TN10;Q3TA76	Symplekin	Sympk	28.7304	28.9451	29.3871	29.3656	29.1924	29.1046	26.3637	26.4769	26.019	35	35	35	35.6	35.6	35.6	142.62	0	130.65	2347500000	108	4.93644	0.000201533
698	Q8C2K8;F8WJF7;Q922B6;H3BJD9	Q8C2K8;F8WJF7;Q922B6	E3 ubiquitin-protein ligase TRAF7	Traf7	24.4158	24.6429	25.2169	24.5251	23.8302	24.6138	25.5875	25.6944	25.7347	8	8	8	15.9	15.9	15.9	69.967	0	8.1261	153100000	14	2.08298	0.0219106
699	F8WJG3;P62996;Q5PR75	F8WJG3;P62996;Q5PR75	Transformer-2 protein homolog beta	Tra2b	30.7265	30.4275	30.8994	31.5738	31.5193	31.7751	29.0021	29.2313	29.414	9	9	9	51.1	51.1	51.1	21.935	0	323.31	12620000000	228	4.75628	0.000263756
700	G3UVU2;D3YW09;Q7TN25;Q62203;D3Z5A6	G3UVU2;D3YW09;Q7TN25;Q62203	Splicing factor 3A subunit 2	Sf3a2	29.6285	29.5413	29.7942	30.0243	31.002	30.4094	28.2908	28.1243	28.0214	11	11	11	30.3	30.3	30.3	51.278	0	155.52	4527600000	86	3.62307	0.00158781
701	Q3UHH6;G3UWG2;Q60610;E9Q2Y4;Q3TRA4;E9Q1R7;Q3UVX2;Q6P1D6;J3QQ55;Q3TQ81;J3QMH1;Q6ZPF3-4;Q91X46;Q91X46-3;Q91X46-2	Q3UHH6;G3UWG2;Q60610;E9Q2Y4;Q3TRA4	T-lymphoma invasion and metastasis-inducing protein 1	Tiam1	28.936	28.7105	28.7704	28.448	28.5188	28.391	29.191	28.9393	29.1019	36	36	34	28	28	26.3	166.91	0	82.498	2639200000	142	2.95367	0.00482316
702	G3UWV4;Q69Z98-2;G3UZ19;G3UYN4	G3UWV4;Q69Z98-2;G3UZ19;G3UYN4	Serine/threonine-protein kinase BRSK2	Brsk2	29.4632	29.3207	29.4522	29.3401	29.4673	29.4128	30.026	30.0334	30.3186	28	23	1	53.4	46.9	5.5	77.777	0	130.36	4302200000	155	3.4793	0.00200283
703	G8JL74;G3UXA6;Q8BHD7-2;Q8BHD7;G3UZ01;G3UY95;F7C521;G3UXZ8;G3UXZ6;Q8C5Q1;Q9CX77	G8JL74;G3UXA6;Q8BHD7-2;Q8BHD7;G3UZ01	Polypyrimidine tract-binding protein 3	Ptbp3	26.874	27.3905	27.3977	27.3917	27.7533	28.0668	26.3206	26.3161	26.707	14	10	10	35	29.4	29.4	59.465	0	40.824	835100000	55	2.32585	0.0142451
704	G3UZJ3;G3UXK0;G3UY34;Q8K0N0;Q8C8Z9;G3UZ87;G3UYM7;O70585-2;O70585;G3UYK9;G3UXI3;Q8BNG4;Q3U070;G3UXH9;G3UXP7;G3UX96;G3UYN2	G3UZJ3;G3UXK0;G3UY34;Q8K0N0;Q8C8Z9;G3UZ87;G3UYM7;O70585-2;O70585;G3UYK9	Dystrobrevin;Dystrobrevin beta	Dtnb	23.4467	24.4667	23.2545	23.5596	24.8655	24.8852	26.1201	25.6395	25.5217	13	8	8	20.9	14.3	14.3	63.41	0	7.6788	221430000	13	1.77658	0.0374728
705	G3UY75;Q64487-1;Q64487-11;Q64487-9;Q64487-10;Q64487-7;Q64487-8;Q64487-5;Q64487-6;Q64487;Q64487-3;G3UYU6;G3UX60;G3UWK6;E9PVW8;B9EJA3;Q64487-12;E9Q7I7;Q5SPA9;Q64487-2;Q8R169;Q8C922;Q3V315;Q8CC54;Q8CC23;G3UYR6;Q3UUC2;Q64696;G3UX75	G3UY75;Q64487-1;Q64487-11;Q64487-9;Q64487-10;Q64487-7;Q64487-8;Q64487-5;Q64487-6;Q64487;Q64487-3;G3UYU6;G3UX60;G3UWK6;E9PVW8;B9EJA3;Q64487-12;E9Q7I7;Q5SPA9;Q64487-2	Protein-tyrosine-phosphatase;Receptor-type tyrosine-protein phosphatase delta	Ptprd	30.46	30.5991	30.4752	30.6953	30.6963	30.5493	31.0951	31.1721	31.0063	59	59	35	45.5	45.5	29.5	211.81	0	305.84	9882300000	405	3.5189	0.00186967
706	G3UYF9;Q792E4;Q03958	G3UYF9;Q792E4;Q03958	Prefoldin subunit 6	Pfdn6	26.8741	27.2826	27.4614	25.9858	25.4642	26.4597	25.9731	26.7048	26.4193	5	5	5	58.4	58.4	58.4	11.409	0	22.24	533380000	27	1.6393	0.0476075
707	G3UYS3;Q3UIK4;E9QPC5;Q3UIK4-2;G3UXL6	G3UYS3;Q3UIK4;E9QPC5;Q3UIK4-2	N6-adenosine-methyltransferase subunit METTL14	Mettl14	23.4735	23.3651	22.6314	24.2113	24.8928	24.4533	24.0604	23.6121	23.4004	3	3	3	8.8	8.8	8.8	44.024	0.0025538	2.3515	98415000	5	1.86752	0.0320145
708	G3UYW1;Q6VNB8;Q6VNB8-2;G3UYV1;Q8CHB9;B7NZ86;G3UY81;G3UWK9;D6RHB7	G3UYW1;Q6VNB8	WD repeat and FYVE domain-containing protein 3	Wdfy3	30.0566	30.0093	29.9355	29.7302	29.7956	29.7099	30.9106	30.9339	30.7517	89	89	88	30.1	30.1	29.9	394.29	0	314.75	7283400000	382	5.48655	9.70508e-05
709	G3UYZ1;Q8R366;D3Z4Q8	G3UYZ1;Q8R366	Immunoglobulin superfamily member 8	Igsf8	32.114	32.0831	32.2365	32.4387	32.5205	32.4258	32.8325	32.5945	32.8958	24	24	24	61.3	61.3	61.3	58.131	0	323.31	36195000000	706	2.95097	0.00484684
710	G3UZA0;Q8BGA5	G3UZA0;Q8BGA5	KRR1 small subunit processome component homolog	Krr1	24.689	25.2583	24.3489	25.7032	26.3882	26.032	24.251	22.3084	22.5595	4	4	4	13.6	13.6	13.6	36.66	0	8.1836	197000000	12	2.2702	0.0156866
711	G3UZM4;Q8BLQ9-3;Q8BLQ9-2;Q8BLQ9;D3Z0N3	G3UZM4;Q8BLQ9-3;Q8BLQ9-2;Q8BLQ9	Cell adhesion molecule 2	Cadm2	30.87	30.9088	31.4225	31.661	31.7897	31.8838	31.2466	31.2315	31.3353	17	17	17	54.5	54.5	54.5	47.345	0	214.74	16187000000	202	1.99707	0.0254946
712	G3UZY2;P97493;G3UX99;A2A439	G3UZY2;P97493	Thioredoxin, mitochondrial	Txn2	28.1869	27.3699	28.0311	29.9578	29.4536	29.7979	27.2919	26.9871	27.1845	4	4	4	47.7	47.7	47.7	14.099	0	55.724	2254700000	44	3.91435	0.000989211
713	G3V027;Q9Z2C9;I6L9A6;G3UYZ2;G3UYB7	G3V027;Q9Z2C9;I6L9A6;G3UYZ2;G3UYB7	Myotubularin-related protein 7	Mtmr7	28.1569	28.2008	28.5969	27.7358	27.8517	27.7998	28.5559	28.49	28.2207	16	16	16	45	45	45	57.714	0	53.59	1578600000	100	1.99126	0.0257087
714	Q922W2;G3X8R5;Q3UA37;Q8BMY0;Q8BUN3	Q922W2;G3X8R5;Q3UA37;Q8BMY0	Glutamine-rich protein 1	Qrich1	26.1978	27.7506	27.7589	27.6382	27.2886	27.8832	24.0494	23.4504	24.8767	11	11	11	34.4	34.4	34.4	47.51	0	29.819	631610000	31	2.82839	0.00592213
715	H3BIW0;G3X8T2;Q0P678;H3BJJ9;H3BJN4	H3BIW0;G3X8T2;Q0P678	Zinc finger CCCH domain-containing protein 18	Zc3h18	27.1404	26.8745	27.6755	28.3182	28.6354	28.7617	25.3644	25.1387	23.5157	8	8	8	11.6	11.6	11.6	106.14	0	19.882	1080900000	27	3.06667	0.00398753
716	G3X8U3;Q9D7X2	G3X8U3		2210016F16Rik	26.9251	27.3874	27.6563	26.1287	26.7723	26.3382	27.0922	27.2249	27.3884	9	9	9	32.8	32.8	32.8	38.615	0	26.131	692050000	38	1.75133	0.0391404
717	Q921Y1;G3X8X0;Q80TX4;Q05BH3;Q9CRI3;G3UXT5	Q921Y1;G3X8X0;Q80TX4;Q05BH3		Dhx16;mKIAA0577	27.2156	27.1751	27.5992	28.2616	27.7071	27.5671	24.9915	25.1339	24.0225	16	15	15	19.3	18.5	18.5	119.09	0	44.439	659130000	49	3.62893	0.00157616
718	Q8BWV2;G3X8X7;Q920Q4;Q920Q4-2;Q8C016;A2BI90	Q8BWV2;G3X8X7;Q920Q4;Q920Q4-2	Vacuolar protein sorting-associated protein 16 homolog	Vps16	28.9472	29.1453	29.2231	28.8753	28.8861	28.5214	29.3456	29.247	29.1616	24	24	24	39.7	39.7	39.7	94.799	0	81.838	3258700000	118	1.68657	0.043866
719	G3X915;Q9D7V2;Q9D7V2-2	G3X915;Q9D7V2	LysM and putative peptidoglycan-binding domain-containing protein 2	Lysmd2	27.2288	26.9078	25.7903	25.5458	25.4279	25.546	26.8749	27.2814	27.7966	9	9	7	39.5	39.5	34.9	23.594	0	18.984	679880000	53	1.86613	0.0320943
720	G3X920;Q9DBR3	G3X920;Q9DBR3	Armadillo repeat-containing protein 8	Armc8	27.9103	28.0307	28.1822	27.7849	27.5782	27.7435	28.1363	28.2155	28.2551	20	20	9	35.2	35.2	16	75.401	0	33.565	1547700000	92	2.48176	0.010953
721	G3X934;Q3TWF6	G3X934;Q3TWF6	WD repeat-containing protein 70	Wdr70	26.139	25.0338	25.789	25.4427	25.5413	25.1981	23.8912	23.7644	23.9804	9	9	9	16.1	16.1	16.1	73.06	0	9.8375	196780000	15	2.80599	0.00616056
722	G3X937;Q921R8;Q921R8-2;B2RQZ3;Q8BYR8	G3X937;Q921R8;Q921R8-2	Solute carrier family 41 member 3	Slc41a3	28.0486	28.1969	27.716	27.3159	26.7684	26.9446	28.8416	28.4124	28.4658	7	7	6	21.7	21.7	19.7	53.289	0	65.116	1960300000	44	3.08531	0.00385564
723	G3X939;Q9WUJ5	G3X939	Sodium/hydrogen exchanger	Slc9a3	23.8051	24.1031	25.0613	23.2758	23.5108	22.4606	25.1854	25.5149	24.6453	5	5	5	7.4	7.4	7.4	93.103	0	5.5007	130490000	6	1.92919	0.0287722
724	G3X956;Q920B9;REV__Q8K242;REV__Q8BN19;REV__Q62293;REV__Q60711;REV__Q566I8;REV__Q4FK68;REV__Q3TLR6;REV__F8VQ39	G3X956;Q920B9	FACT complex subunit SPT16	Supt16;Supt16h	30.2744	29.9194	30.656	30.7292	30.6713	30.704	28.6231	28.0819	27.2814	38	38	38	40.7	40.7	40.7	119.84	0	323.31	6106000000	150	3.21008	0.00312827
725	G3X9A7;Q8BLJ3;B2RPW5	G3X9A7;Q8BLJ3;B2RPW5	PI-PLC X domain-containing protein 3	Plcxd3	30.5274	30.422	30.5702	29.558	29.2374	29.5282	30.7465	30.4901	30.717	10	10	10	44.2	44.2	44.2	36.314	0	124.75	6932100000	213	4.14238	0.000692551
726	G3X9B1;Q3UNW7;Q3TNE1;Q3TMK0;Q8BLJ4;Q3T9I0;Q3V1X6;Q8CCT5;Q8VCK1	G3X9B1;Q3UNW7;Q3TNE1;Q3TMK0		Heatr1	26.0854	26.1975	26.0183	26.5143	26.5687	26.5133	25.32	25.1251	25.3429	16	16	16	10	10	10	242.07	0	21.414	333810000	33	5.20063	0.000141243
727	G3X9F4;Q8VD26-2;Q8VD26;F6ZAS5;S4R1U1;Q8VD26-3	G3X9F4;Q8VD26-2;Q8VD26	Transmembrane protein 143	Tmem143	26.9216	27.1328	27.1389	27.7945	28.0101	27.5376	27.8111	27.5984	27.5012	8	8	8	30.8	30.8	30.8	51.579	0	120.54	864980000	50	2.21351	0.0173697
728	G3X9G2;Q9JM52;Q9JM52-3;F7AMS7;Q571L1;Q61155;J3QP32	G3X9G2;Q9JM52;Q9JM52-3;F7AMS7	Misshapen-like kinase 1	Mink1	28.9369	28.8975	28.7335	27.8456	28.3164	28.0057	29.1106	29.2574	29.2381	34	21	1	26.6	18.2	0.7	151.22	0	82.837	2551600000	98	3.50804	0.00190444
729	G3X9H5;P42859;P42859-2	G3X9H5;P42859;P42859-2	Huntingtin	Htt	31.4409	31.6791	31.662	31.1505	31.153	31.0329	32.153	32.1395	32.0338	108	108	108	46.3	46.3	46.3	344.78	0	323.31	17059000000	720	4.38665	0.000475641
730	G3X9H7;Q6ZQB7;Q8R1S4-2;Q8R1S4	G3X9H7;Q6ZQB7;Q8R1S4-2;Q8R1S4	Metastasis suppressor protein 1	Mtss1	29.4439	29.4445	29.8087	27.7383	27.833	27.6435	29.7964	29.3832	29.6175	24	24	22	37.8	37.8	35.8	82.421	0	92.413	3435400000	138	4.68138	0.000292559
731	G3X9J0;Q4VBF3;S4R1S0;Q6A050;S4R2N4;S4R1U8;Q8BGC2;A6H637;Q8K054;Q9CSR2;A7MCX1;A2VCS4;A0AUN2	G3X9J0		Sipa1l3	27.0237	27.3427	27.5863	26.8209	26.668	26.6181	27.2744	26.9682	27.2468	22	22	21	17.3	17.3	16.8	195.06	0	25.217	805260000	42	1.65895	0.0461455
732	G3X9J1;G5E8Y0;P70414;O35157;Q27PY9;Q9ET74;Q91ZJ7;Q8R505;Q9ET73;Q9ET70	G3X9J1;G5E8Y0;P70414;O35157;Q27PY9;Q9ET74;Q91ZJ7	Sodium/calcium exchanger 1	Slc8a1	28.9311	28.5341	28.8575	29.5082	29.5824	29.5566	29.5045	29.805	29.8163	25	25	2	28.1	28.1	2.5	108.04	0	287.22	4376400000	145	3.08787	0.00384395
733	G3X9J4;Q148V7;Q148V7-3	G3X9J4;Q148V7;Q148V7-3	LisH domain and HEAT repeat-containing protein KIAA1468	2310035C23Rik;Kiaa1468	30.64	30.4509	30.746	30.5989	30.2801	30.2437	30.9352	30.8472	30.8511	42	42	2	44	44	1.5	134.57	0	216.16	8062900000	334	1.81313	0.0351333
734	Q8CDK8;G3X9J8;G5E8G5;O54990-6;O54990-3;O54990-2;O54990;Q8R056;O54990-4;O54990-5;Q8C3K1	Q8CDK8;G3X9J8;G5E8G5;O54990-6;O54990-3;O54990-2;O54990;Q8R056;O54990-4;O54990-5	Prominin-1	Prom1	26.1848	26.6994	26.3376	27.7369	27.3355	27.4483	25.2831	25.1814	25.0176	11	11	11	19.6	19.6	19.6	92.714	0	70.159	688280000	29	4.54146	0.000369655
735	G3X9K3;D3YYK9;Q8R3I7	G3X9K3	Brefeldin A-inhibited guanine nucleotide-exchange protein 1	Arfgef1	29.5327	29.5769	29.4743	28.9212	28.9526	28.9543	29.6505	29.3353	29.3094	59	39	39	40.1	30	30	208.5	0	102.12	3442300000	163	2.79826	0.00623732
736	G3X9N3;Q3USL6;Q3UPU9	G3X9N3;Q3USL6;Q3UPU9		Pnmal2	27.5167	27.6078	27.9275	27.6044	27.7126	27.5628	25.8331	25.9408	26.1992	11	11	11	22.8	22.8	22.8	71.755	0	23.859	915950000	72	4.53676	0.000372944
737	Q3ZAS1;G3X9W4;P49117;Q3U015;Q3ZAR9;Q5DTL3	Q3ZAS1;G3X9W4;P49117;Q3U015;Q3ZAR9;Q5DTL3	Nuclear receptor subfamily 2 group C member 2	Nr2c2	26.1854	26.6953	26.3397	28.0379	27.3237	27.8468	22.7322	25.518	25.3761	9	9	9	25	25	25	65.239	0	31.498	537670000	23	1.77184	0.037755
738	G3X9X1;Q6ZPP6;Q8BSY6;Q8R1W9	G3X9X1;Q6ZPP6;Q8BSY6;Q8R1W9		Kbtbd2	26.1764	26.223	26.4288	26.3286	26.2289	26.4448	26.5349	26.6151	26.6353	10	10	10	19.7	19.7	19.7	71.285	0	15.926	456990000	25	1.69127	0.0434782
739	G3X9Y1;O35681;Q9JM86;D3YYS0;D3Z1B8	G3X9Y1;O35681	Synaptotagmin-3	Syt3	29.3122	29.4122	29.763	27.5925	27.7658	27.9072	29.9858	29.8782	30.1046	21	21	19	42.9	42.9	41.6	63.244	0	114.75	3199400000	128	4.96235	0.000192942
740	G3XA00;Q68EF4;Q68EF4-2	G3XA00;Q68EF4;Q68EF4-2	Metabotropic glutamate receptor 4	Grm4	30.8744	30.6673	30.7836	28.8595	28.992	28.7631	31.3498	31.5045	31.2532	25	24	23	33.1	32	31.4	101.78	0	323.31	8819000000	265	6.3268	3.76149e-05
741	Q3UVV3;G3XA53;Q63912;Q8CAB4	Q3UVV3;G3XA53;Q63912	Oligodendrocyte-myelin glycoprotein	Omg	30.8524	30.7803	30.4872	31.482	31.4951	31.451	30.9069	30.8395	30.9341	11	11	11	22.7	22.7	22.7	49.283	0	102.03	13359000000	178	3.34106	0.00251884
742	G4W8R4;G4W8R2;G4W8R3;Q7TPW1	G4W8R4;G4W8R2;G4W8R3;Q7TPW1	Nexilin	Nexn	23.3847	23.9397	24.1946	22.5612	22.9948	23.649	24.3766	25.2787	25.5121	5	5	5	9.3	9.3	9.3	64.339	0.00015425	5.048	83093000	11	1.99518	0.0255758
743	G5E829;Q8K314;Q3TC38;Q3TDJ2;Q05CJ5;Q6PG79;Q3TSK3;REV__D3Z6I9;REV__D3Z3W5;REV__Q3V3C1;REV__D3YVK8;REV__Q3UX62	G5E829;Q8K314	Plasma membrane calcium-transporting ATPase 1	Atp2b1	32.6561	32.4793	32.2903	32.6902	32.8232	32.554	32.9071	32.9154	32.8951	62	41	36	48.3	36	31.2	134.75	0	323.31	47797000000	876	1.7013	0.0427368
744	G5E837;F6T088;A0AUN4;F6T0G2;Q9D968	G5E837		Hcfc2	24.0115	23.9789	24.1655	25.0634	25.551	24.7995	24.0552	23.6748	23.7309	6	5	5	9.8	8.6	8.6	79.434	0	6.2661	147720000	12	2.79106	0.00631886
745	G5E866;Q99NB9;Q3US00;A0JLN0;Q8C839;Q8C2Y9;Q3TB51	G5E866;Q99NB9;Q3US00	Splicing factor 3B subunit 1	Sf3b1	31.6773	31.4202	31.5739	32.4998	32.574	32.6152	30.4961	30.2406	30.2355	58	58	34	58.2	58.2	34.1	145.83	0	323.31	20525000000	500	5.86353	6.18127e-05
746	G5E884;O88643;S4R2K7;Q9R2B2	G5E884;O88643	Non-specific serine/threonine protein kinase;Serine/threonine-protein kinase PAK 1	Pak1	32.0228	31.9465	31.7125	32.0778	31.9692	31.8645	32.161	32.312	32.3072	27	27	16	60.8	60.8	40.1	60.607	0	323.31	22900000000	421	1.62953	0.0485059
747	G5E896;Q3UJB9-2;Q3UJB9;D6RE33;F6ZJ27;F6V5I7	G5E896;Q3UJB9-2;Q3UJB9;D6RE33	Enhancer of mRNA-decapping protein 4	Edc4	29.2426	29.4749	29.5572	29.962	29.8848	29.8127	28.2753	28.4826	28.7953	32	32	32	38.3	38.3	38.3	152.48	0	262.62	4052800000	174	3.56626	0.00174225
748	G5E8A0;Q8CI95	G5E8A0;Q8CI95	Oxysterol-binding protein;Oxysterol-binding protein-related protein 11	Osbpl11	27.374	27.616	27.4391	27.5585	27.6969	27.0887	28.0395	28.0255	28.1421	11	11	9	17.3	17.3	14.3	84.332	0	13.305	1117000000	36	1.81896	0.0347983
749	G5E8B9;Q8BZQ5	G5E8B9;Q8BZQ5		Zbtb11	25.3751	24.723	24.9122	25.7304	25.6489	25.9689	23.5053	23.4452	23.027	9	9	9	12.3	12.3	12.3	118.56	0	21.049	196320000	13	4.12573	0.000710219
750	G5E8I8;Q8CGZ0	G5E8I8;Q8CGZ0	Calcium homeostasis endoplasmic reticulum protein	Cherp	28.7622	28.8574	28.4818	29.7626	29.8049	29.115	26.4823	26.9363	26.2603	21	21	20	27.6	27.6	26.9	106.41	0	87.916	2415600000	96	4.1614	0.000668758
751	G5E8J3;Q8K1X1;Q3TDR2	G5E8J3;Q8K1X1	WD repeat-containing protein 11	Wdr11	28.7809	28.8448	28.6514	28.1939	28.7279	28.4312	29.6195	29.2567	29.46	29	29	29	28.5	28.5	28.5	135.97	0	90.382	3172200000	101	2.6757	0.00779058
752	G5E8J9;Q8CFE4;Q8CFE4-2;Q80UY7	G5E8J9;Q8CFE4	SCY1-like protein 2	Scyl2	28.9516	28.8181	28.8587	28.4618	28.5871	28.1639	29.2375	29.1377	28.9339	22	22	22	28.4	28.4	28.4	103.19	0	126.84	2630300000	107	2.33933	0.0139318
753	G5E8N7;Q9JLV6;E9Q9A5;Q3T9F5;Q9JLV6-2	G5E8N7;Q9JLV6;E9Q9A5;Q3T9F5;Q9JLV6-2	Bifunctional polynucleotide phosphatase/kinase;Polynucleotide 3-phosphatase;Polynucleotide 5-hydroxyl-kinase	Pnkp	28.0611	27.6451	28.0617	28.7238	28.8039	28.829	26.5806	25.8165	26.1319	15	15	15	37.4	37.4	37.4	57.214	0	22.221	2033700000	45	4.26784	0.000559014
754	G5E8Q0;P97412;P97412-2;Q8BN38;Q8BQ04;Q3U4C2;Q3TV54;Q3US13	G5E8Q0;P97412	Lysosomal-trafficking regulator	Lyst	27.4369	27.859	27.8404	26.4984	26.4623	26.6429	27.992	27.756	27.9699	37	37	37	13.5	13.5	13.5	425.32	0	58.847	1013600000	76	3.96067	0.000922327
755	G5E8Q4;Q922J4;Q3TXK1;Q3TGW1;Q5DTF5;O08967;Q8CBE4	G5E8Q4;Q922J4;Q3TXK1;Q3TGW1;Q5DTF5;O08967;Q8CBE4	Cytohesin-3	Cyth3	25.4103	24.8589	25.8557	24.4606	24.4212	24.4687	25.301	25.7264	25.9233	9	5	5	30.5	16.8	16.8	40.809	0	9.8709	251910000	22	1.92338	0.0290296
756	G5E8R4;Q922D4-2;Q922D4;Q922D4-3;Q922D4-4	G5E8R4;Q922D4-2;Q922D4;Q922D4-3;Q922D4-4	Serine/threonine-protein phosphatase 6 regulatory subunit 3	Ppp6r3	28.4054	28.5559	28.5443	27.6218	27.9375	27.8034	28.5491	28.6323	28.5334	25	25	25	34.7	34.7	34.7	97.862	0	47.647	1644400000	95	3.70354	0.0013975
757	G5E8R8;Q3UGV7;Q6P5G6	G5E8R8;Q3UGV7;Q6P5G6	UBX domain-containing protein 7	Ubxn7	28.1511	28.0274	28.2398	27.6216	28.1458	27.7771	26.3468	26.7139	26.5946	11	11	11	22.7	22.7	22.7	54.812	0	35.716	1018100000	41	3.83742	0.00112243
758	G5E8T6;Q9EQJ9-2;Q9EQJ9	G5E8T6;Q9EQJ9-2;Q9EQJ9	Membrane-associated guanylate kinase, WW and PDZ domain-containing protein 3	Magi3	23.9455	24.1435	24.3303	23.8701	23.6921	23.9008	24.7249	24.9156	24.2663	5	4	4	4	3.5	3.5	161.62	0	5.1383	131950000	10	1.85029	0.0329775
759	G5E8T9;Q99KB8;E9PYA3;Q99KB8-2;E9Q2H8;D3YWI0;D3YUX8;D3YV58	G5E8T9;Q99KB8;E9PYA3;Q99KB8-2;E9Q2H8;D3YWI0	Hydroxyacylglutathione hydrolase, mitochondrial	Hagh	30.7818	30.8205	30.5016	30.8015	30.7422	30.6066	31.276	31.2064	30.9915	13	13	13	59.2	59.2	59.2	34.103	0	212.64	12852000000	178	1.88214	0.03118
760	Q8BIC1;Q80XN4;G5E905;Q80T67	Q8BIC1;Q80XN4;G5E905;Q80T67		Zfp871	24.928	26.152	24.1691	26.9799	26.6125	26.2687	23.4197	22.8377	22.454	5	5	5	13.6	13.6	13.6	56.809	0	13.667	163640000	9	2.81421	0.00607422
761	Q544R9;G5E920;O54879;A2AP78	Q544R9;G5E920;O54879;A2AP78	High mobility group protein B3	Hmgb3	29.7661	29.543	29.6176	29.0621	29.1256	29.2561	25.6919	26.7089	26.9799	10	10	10	38.5	38.5	38.5	23.01	0	29.389	2897300000	40	3.84871	0.00110273
762	G5E924;Q3UMT7;Q8R081;G3UY38;Q8BI42;Q9CVU5	G5E924;Q3UMT7;Q8R081;G3UY38	Heterogeneous nuclear ribonucleoprotein L	Hnrnpl	33.4227	33.406	33.5132	33.9371	34.1884	34.2442	32.0416	32.0997	32.1237	34	34	29	72.7	72.7	57.7	66.821	0	323.31	82910000000	854	6.02684	5.49431e-05
763	H3BJU7;H3BJX8;H3BJ45;H3BJ40;H3BKH9;Q60875-5;Q60875-4;Q60875;Q3TYZ4;Q60875-3;Q60875-2;H3BL15;H3BLF9;H3BJ59;H3BLJ1;H3BIX8;H3BJM4;H3BJ48	H3BJU7;H3BJX8;H3BJ45;H3BJ40;H3BKH9;Q60875-5;Q60875-4;Q60875;Q3TYZ4;Q60875-3;Q60875-2	Rho guanine nucleotide exchange factor 2	Arhgef2	28.9514	28.9206	29.0147	29.5696	29.1312	29.448	28.0922	28.2578	28.5158	29	29	29	37.8	37.8	37.8	108.59	0	145.19	2575200000	162	3.02893	0.00423231
764	H3BJB4;Q3U464;Q99MB7;H3BJE9;H3BK28;H3BJU0	H3BJB4;Q3U464;Q99MB7;H3BJE9	RING finger protein 141	Rnf141	26.028	26.5501	26.7213	26.1512	26.5625	26.2951	27.0634	27.7455	27.4066	5	5	5	33.3	33.3	33.3	19.846	0	15.662	675660000	29	1.99154	0.0257214
765	H3BKQ7;Q7TSA7;H3BJD0;Q3UUK5;H3BL28;Q7TN74;H3BJD6;Q3UXW4;H3BKE7;Q8BMP0;Q80ZL7;Q80TH3;H3BJA6	H3BKQ7;Q7TSA7;H3BJD0;Q3UUK5;H3BL28;Q7TN74;H3BJD6;Q3UXW4		Ppp1r9a	28.5382	28.7723	28.8393	29.3226	29.3807	29.5624	28.4214	28.5833	28.5038	20	19	19	30.4	29.3	29.3	107.17	0	138.55	3065800000	102	3.58781	0.00168604
766	H3BJW3;H3BJ30;Q6NVF9;H3BKW0;H3BLM9	H3BJW3;H3BJ30;Q6NVF9	Cleavage and polyadenylation specificity factor subunit 6	Cpsf6	30.5495	30.4413	30.6993	30.8202	31.3099	31.3291	28.7859	28.9462	28.8587	16	16	16	31.1	31.1	31.1	63.413	0	314.17	8592500000	170	4.83336	0.000232628
767	H3BJZ7;Q4KUS2;H3BJL3;H3BKY4	H3BJZ7;Q4KUS2	Protein unc-13 homolog A	Unc13a	30.9288	30.8486	30.7481	29.8143	29.8414	29.7822	32.1517	31.9835	31.8815	61	61	47	41.8	41.8	34.3	195.83	0	323.31	13234000000	416	6.35611	3.55946e-05
768	H3BKM2;Q80YV2;Q80YV2-2;Q3TI64;D3Z3D0	H3BKM2;Q80YV2;Q80YV2-2;Q3TI64;D3Z3D0	Nuclear-interacting partner of ALK	Zc3hc1	26.5393	26.6288	26.9738	27.6664	27.8554	27.4225	24.7769	25.4128	21.4557	16	16	16	51	51	51	50.513	0	36.072	720800000	44	1.6323	0.0482588
769	H3BKQ3;H3BL92;H3BJ67;Q3U1G0;H3BJ57;H3BJX1;H3BLD3;REV__B0QZT9;E9Q7X9;REV__Q8R3A1;REV__Z4YM25;REV__Q8BHJ9;D3Z5T1	H3BKQ3;H3BL92;H3BJ67		Evi5l	26.9281	26.9785	26.8246	27.1114	27.2247	27.2564	27.6531	27.5445	27.2764	14	14	12	20.8	20.8	18.9	93.503	0	25.338	791490000	38	2.35762	0.0135017
770	H3BL37;O08784;Q05BH6;Q7TPZ2;Q05CS0;H3BIX0;Q6PFZ6;Q3TBZ3;Q3TAB2;H3BK88	H3BL37;O08784;Q05BH6;Q7TPZ2;Q05CS0;H3BIX0;Q6PFZ6	Treacle protein	Tcof1	29.0764	29.0697	29.008	29.2164	29.7635	29.3779	27.3798	27.5654	27.8423	23	23	23	22.3	22.3	22.3	138.55	0	106.88	2220300000	100	4.0435	0.000810147
771	H3BLL2;Q811I0;H3BJP9;V9GX21;H3BK16;H3BLD0;H3BKR0	H3BLL2;Q811I0;H3BJP9;V9GX21;H3BK16	ATP synthase mitochondrial F1 complex assembly factor 1	Atpaf1	27.6631	28.0946	28.4148	28.2792	28.4138	28.3609	27.5272	27.5134	27.675	10	10	10	34.5	34.5	34.5	38.796	0	47.644	1482800000	71	1.80639	0.0355465
772	Q3TPT3;H6RXZ1;P46096	Q3TPT3;H6RXZ1;P46096	Synaptotagmin-1	Syt1	34.8525	34.7422	34.4307	33.9333	33.8682	33.8233	34.7229	34.6599	34.6615	30	30	12	60.3	60.3	26.8	47.435	0	323.31	120130000000	1793	3.37761	0.00239012
773	Q6PDI9;H6WCS3;Q00560;V9GX00;Q3UQA0;V9GX52;V9GXT4;V9GXA2	Q6PDI9;H6WCS3;Q00560;V9GX00;Q3UQA0	Interleukin-6 receptor subunit beta	Il6st;il6st	26.597	26.1187	26.2666	26.2492	25.5176	25.1313	26.7557	26.7767	26.9484	13	13	13	20.4	20.4	20.4	102.44	0	21.595	439000000	27	1.71942	0.0414527
774	Q3UP61;H7BWY4;Q811D0;E9Q9H0;Q811D0-2;Q811D0-3;S4R2T8;Q571K0;Q8CD64	Q3UP61;H7BWY4;Q811D0;E9Q9H0;Q811D0-2;Q811D0-3	Disks large homolog 1	Dlg1	31.3323	31.3589	31.2647	31.1414	30.896	30.9518	31.7898	31.6728	31.7021	43	31	5	55.5	46.4	12	96.789	0	323.31	15588000000	319	3.80243	0.00118995
775	H7BWZ9;Q8BL99-5;Q8BL99-6;Q8BL99;Q3V3M6;Q8BL99-3;Q8BL99-4;Q8BL99-2;Q9DCG4;Q69ZR7;Q3TSJ5	H7BWZ9;Q8BL99-5;Q8BL99-6;Q8BL99	Protein dopey-1	Dopey1	24.7514	25.0505	24.7777	25.596	25.4974	25.4923	25.2582	25.1613	25.7637	9	8	8	5.4	5	5	276.64	0	13.87	272560000	25	1.72949	0.0407191
776	H7BX32;Q3U425;Q8K3Z9;Q6A036	H7BX32;Q3U425;Q8K3Z9;Q6A036	Nuclear envelope pore membrane protein POM 121	Pom121;mKIAA0618	27.1469	26.9089	26.5614	27.6415	28.3311	27.7664	26.3133	26.3745	25.7232	13	13	13	13.9	13.9	13.9	120.9	0	75.037	820970000	45	2.67702	0.00778452
777	H7BX64;Q3URD3-2;Q3URD3;D3Z7V3;F8WIH0;F6YCM8;Q3URD3-5;F6UV57;Q3URD3-4;Q3URD3-3;D3YV81;Q3TQF4;F6WY34;D3Z0N1	H7BX64;Q3URD3-2;Q3URD3;D3Z7V3;F8WIH0;F6YCM8;Q3URD3-5	Sarcolemmal membrane-associated protein	Slmap	27.451	27.4891	27.8378	27.4173	27.2767	27.4415	27.9135	27.8965	28.2932	21	21	21	30	30	30	95.089	0	178.83	1153800000	63	1.88127	0.0312196
778	H7BX95;Q6PDM2;Q6PDM2-3;Q6PDM2-2;F7AI47;F6QXN3	H7BX95;Q6PDM2;Q6PDM2-3;Q6PDM2-2	Serine/arginine-rich splicing factor 1	Srsf1	32.0185	31.973	32.101	32.4749	32.3243	32.7277	30.0557	30.131	30.3399	18	18	17	51	51	48.2	28.329	0	319.9	25762000000	350	5.50857	9.57351e-05
779	H9H9T1;Q3TGF2;H3BLM7;H3BLE6	H9H9T1;Q3TGF2;H3BLM7	Protein FAM107B	Fam107b	27.1385	27.1916	27.601	25.0563	25.9109	25.9002	27.6832	27.4139	27.4679	8	8	8	35.3	35.3	35.3	17.994	0	40.577	1009300000	24	3.12496	0.00360974
780	H9KV00;Q9QX47-3;Q9QX47;H9KV15;Q9QX47-2;H9KV02;Q8BS91;Q8C9T5;F7CU80;Q80TM4;Q8BM30	H9KV00;Q9QX47-3;Q9QX47;H9KV15;Q9QX47-2	Protein SON	Son	28.4511	28.1221	28.199	28.701	28.6069	28.9965	25.6572	26.2082	25.7691	37	37	7	23.4	23.4	3.6	268.82	0	89.692	1674200000	89	5.01137	0.000177626
781	I1E4X7;Q9JI46;H3BLR8;B2KF67;H3BJY4	I1E4X7;Q9JI46;H3BLR8;B2KF67	Diphosphoinositol polyphosphate phosphohydrolase 1	Nudt3	30.0238	30.0743	30.0174	29.3894	29.6495	29.6034	30.0994	30.2638	30.2264	7	7	6	48.4	48.4	44	17.828	0	165.61	5152900000	126	3.38392	0.00236596
782	I3ITR1;Q9D924	I3ITR1;Q9D924	Iron-sulfur cluster assembly 1 homolog, mitochondrial	AK157302;Isca1	28.2833	28.4321	28.4018	28.559	28.6097	28.6199	27.8134	28.0391	27.9158	6	6	6	52.7	52.7	52.7	14.218	0	19.428	1566100000	34	3.80995	0.00117223
783	I7HLV2;Q3THJ6;Q6ZWV3;P86048;F6RUE0;B7FAU6;O89059	I7HLV2;Q3THJ6;Q6ZWV3;P86048	60S ribosomal protein L10;60S ribosomal protein L10-like	Rpl10;Rpl10l	31.0464	30.9294	30.6154	31.1141	31.19	30.7263	30.2193	29.8663	29.8759	14	14	14	58.2	58.2	58.2	23.072	0	157.29	11425000000	230	2.54317	0.0098021
784	J3KMQ6;Q9CYI0;A0PJK9;Q3TUY5;B1AQG3	J3KMQ6;Q9CYI0;A0PJK9;Q3TUY5	Protein Njmu-R1	5730455P16Rik	27.3066	27.2008	27.2685	26.7146	27.2856	26.9362	27.6037	27.4937	27.6501	10	10	10	37.2	37.2	37.2	44.41	0	45.728	850090000	48	1.79656	0.0361719
785	Q8K2C1;Q3UJF9;Q3U9F0;Q3TJ22;J3QN89	Q8K2C1;Q3UJF9;Q3U9F0;Q3TJ22;J3QN89		Aamp	24.6219	24.3636	25.1858	25.1753	25.3395	25.3928	25.913	26.0454	26.6223	3	3	3	11.2	11.2	11.2	38.509	0	12.834	230740000	14	2.32475	0.0142614
786	Q5NCM5;J3QNT7;Q69ZS5;F7CUV7;A8Y5D4;F7CD65;A8Y5D5	Q5NCM5;J3QNT7;Q69ZS5;F7CUV7		Epn2	27.9664	28.8266	28.1951	27.93	27.9385	28.0962	29.2087	29.1159	29.4296	12	12	2	25.7	25.7	6	67.785	0	114.71	2542100000	79	2.43729	0.0118514
787	J7I1C3;Q6PR54-2;Q6PR54;Q6PR54-3;Q8CEM8	J7I1C3;Q6PR54-2;Q6PR54;Q6PR54-3	Telomere-associated protein RIF1	Rif1	25.8632	25.9077	25.3074	28.1751	27.8966	27.6575	24.0383	23.8263	24.276	25	25	25	15.5	15.5	15.5	265.9	0	81.572	648300000	47	5.09933	0.000163764
788	K0BWC3;Q9ET54-3;Q9ET54-5;Q9ET54-4;Q9ET54-6;Q9ET54;Q9ET54-2;D3Z1J5;Q8C306	K0BWC3;Q9ET54-3;Q9ET54-5;Q9ET54-4;Q9ET54-6;Q9ET54;Q9ET54-2;D3Z1J5;Q8C306	Palladin	Palld	25.5137	25.403	24.0566	24.009	23.6855	23.5197	25.8904	26.6129	26.3196	8	8	7	10.5	10.5	9.4	108.3	0	15.368	322320000	14	2.47094	0.0111837
789	Q8C089;Q3TSR0;K0J1C6;Q8C197;Q3TXF7;Q9ES89	Q8C089;Q3TSR0;K0J1C6;Q8C197;Q3TXF7;Q9ES89	Exostosin-like 2	Extl2	27.9916	28.6857	28.5284	28.5646	29.4096	28.6382	27.2509	27.3337	27.6716	11	11	11	46	46	46	31.095	0	28.967	1711700000	49	2.12428	0.02036
790	K3W4P2;Q6P4S8;Q3U1N8;Q0KK53;REV__O70337;REV__Q99L97	K3W4P2;Q6P4S8	Integrator complex subunit 1	Ints1	27.6239	27.902	27.9106	28.4007	28.5431	28.8054	27.0864	26.8357	26.7035	34	34	34	21.5	21.5	21.5	247.96	0	118.96	1281200000	107	4.00287	0.000862443
791	K3W4P9;Q8CFE3;B2RSN6;Q6PGA0-2;Q6PGA0	K3W4P9;Q8CFE3	REST corepressor 1	Rcor1	25.6555	26.6256	24.0066	26.2457	26.6371	26.2793	23.9191	22.8023	22.5008	10	10	9	31.5	31.5	29.8	52.714	0	13.596	334450000	23	2.01572	0.0247095
792	K3W4Q8;O55108;O55107;P18572-2;P18572;J3QP71	K3W4Q8;O55108;O55107;P18572-2;P18572;J3QP71	Basigin	Bsg	31.7607	31.7903	31.9598	31.0095	31.3074	31.4208	31.7752	31.9521	32.0888	10	10	10	43.1	43.1	43.1	24.116	0	234.19	19518000000	299	2.36822	0.0132821
793	K3W4R5;Z4YL78;A2AGT5-3;A2AGT5;A2AGT5-2;Q80U79;Q6PB55;Q8K250;Q4V782	K3W4R5;Z4YL78;A2AGT5-3;A2AGT5;A2AGT5-2;Q80U79	Cytoskeleton-associated protein 5	Ckap5	32.196	32.2659	32.1356	32.1872	32.2962	32.0106	32.6111	32.4838	32.4545	92	92	92	49	49	49	225.63	0	323.31	28729000000	809	1.96811	0.0267963
794	Q6NXX6;K3W4T3;Q9Z1G4-3;Q9Z1G4-2;Q3TXT5;Q9Z1G4;Q3TY98;Q99M55;A2A599;Q920R6;Q3UP55;Q3TN88;Q3TLR5	Q6NXX6;K3W4T3;Q9Z1G4-3;Q9Z1G4-2;Q3TXT5;Q9Z1G4;Q3TY98;Q99M55	V-type proton ATPase subunit a;V-type proton ATPase 116 kDa subunit a isoform 1	Atp6v0a1	34.2698	34.3559	34.337	34.1174	34.1593	34.1547	34.7715	34.7241	34.681	40	40	36	45.4	45.4	42.5	95.64	0	323.31	134980000000	1828	5.30525	0.000123714
795	K4DI58;Q99N28	K4DI58;Q99N28	Cell adhesion molecule 3	Cadm3	33.0169	33.0343	33.662	32.2255	32.7565	32.7376	33.838	33.8123	34.3411	22	22	22	51.2	51.2	51.2	46.692	0	323.31	53291000000	599	2.29886	0.0148909
796	Q3UC82;Q3U1F0;Q80ZH7;K4DI59;P97386;B1AT03;P97386-2;Q3TJN5;Q3U0I5;G3UYI8	Q3UC82;Q3U1F0;Q80ZH7;K4DI59;P97386;B1AT03;P97386-2;Q3TJN5	DNA ligase;DNA ligase 3	Lig3	26.6288	26.3977	26.2802	27.1363	27.0409	26.8848	24.8547	24.4221	24.2093	15	15	15	20.2	20.2	20.2	112.71	0	33.507	470120000	49	4.61946	0.000324839
797	Q6DFV2;K4DI62;Q62445	Q6DFV2;K4DI62;Q62445	Transcription factor Sp4	Sp4	25.3473	25.3963	23.6859	26.7208	25.909	27.8056	21.9197	23.7712	23.2973	5	5	5	10.1	10.1	10.1	81.692	0	18.578	374520000	15	2.07941	0.022011
798	K4DI77;Q5ND34-2;Q5ND34;Q5ND34-3;F6XD87;Q6P8W0;Q8R159;Q68EM0;Q3UU62	K4DI77;Q5ND34-2;Q5ND34;Q5ND34-3	WD repeat-containing protein 81	Wdr81	25.6542	25.7488	25.6285	25.9264	26.7262	26.7374	26.4756	26.4973	26.4993	14	14	14	11.3	11.3	11.3	211.81	0	26.115	414920000	33	1.7749	0.037579
799	K7Q751;P34152-3;P34152-4;P34152-2;P34152;P34152-6;P34152-7;P34152-9;P34152-8	K7Q751;P34152-3;P34152-4;P34152-2;P34152;P34152-6	Focal adhesion kinase 1	Ptk2	27.6697	27.3593	27.4105	27.2122	27.0308	26.6129	28.4773	28.3393	28.0986	23	23	8	27.9	27.9	10.1	121.06	0	53.849	1252700000	84	2.97145	0.00468866
800	Q8BPG5;K7Q7T7;Q3TLP8;P63001;Q9D859;Q8C4N8;Q05144	Q8BPG5;K7Q7T7;Q3TLP8;P63001;Q9D859;Q8C4N8	Ras-related C3 botulinum toxin substrate 1	Rac1	33.8032	33.7392	33.6081	32.5977	32.9188	33.213	34.1336	33.9796	34.0194	12	11	4	54.7	49	21.4	21.424	0	144.34	68809000000	717	3.0273	0.00423941
801	Q3UUK3;K7XUH1;O08530;Q99NR5;Q8C4A3	Q3UUK3;K7XUH1;O08530;Q99NR5	Sphingosine 1-phosphate receptor 1	S1pr1;Edg1	29.1511	29.0283	28.8631	28.2112	27.7419	28.5043	29.7474	29.544	29.5337	8	8	8	15.4	15.4	15.4	42.655	0	102.85	3470500000	126	2.96959	0.00470251
802	M0QWP1;Z4YK85;A2ASQ1-3;A2ASQ1-2;A2ASQ1;Q6PCM6;Q5EBX5;Z4YJS5;Q8K326;Q52L98;Q80V56;Q99KT4;O08860;Q91XS3	M0QWP1;Z4YK85;A2ASQ1-3;A2ASQ1-2;A2ASQ1;Q6PCM6;Q5EBX5	Agrin;Agrin N-terminal 110 kDa subunit;Agrin C-terminal 110 kDa subunit;Agrin C-terminal 90 kDa fragment;Agrin C-terminal 22 kDa fragment	Agrn	30.2821	30.2573	30.3993	30.4606	30.4687	30.5306	30.4355	30.4064	30.4437	52	52	52	37	37	37	216.65	0	286.18	7790500000	377	1.83449	0.0339089
803	M1VHG1;M1VMF6;Q8K4B0;F8WHY8;E9PX23;M1VHG3;Q2KHS8;M1VB37;M1V1V1;M1VQI8;M1VQI9	M1VHG1;M1VMF6;Q8K4B0;F8WHY8;E9PX23;M1VHG3;Q2KHS8;M1VB37;M1V1V1;M1VQI8	Metastasis-associated protein MTA1	Mta1	29.5171	29.6206	29.8833	30.0347	29.9205	29.7732	28.2814	28.1424	27.9742	33	33	1	52	52	1.3	80.797	0	69.008	3461500000	158	4.72247	0.000276224
804	O08528;E9Q5B5;E9Q9M6;Q3TCB2;E9Q3Z4;Q08EC2;E9Q8S8;Q3TVQ4;Q3TQE0;Q3TBG9;Q149C8;Q3TRM8	O08528;E9Q5B5	Hexokinase-2;Hexokinase	Hk2	26.514	23.9648	23.6895	23.9017	24.8241	24.2389	27.7059	27.2417	26.6919	18	14	13	24.1	20	18.8	102.53	0	79.581	455650000	33	1.64627	0.0471189
805	O08529;Q3U3A8;Q3U8S5;Q8R486;Q8BPV9;Q920R9	O08529;Q3U3A8;Q3U8S5;Q8R486;Q8BPV9	Calpain-2 catalytic subunit	Capn2	31.2727	31.3801	31.3144	31.1609	31.3241	31.2105	31.4996	31.5219	31.5145	34	34	34	52.1	52.1	52.1	79.871	0	323.31	16409000000	444	2.55282	0.00964732
806	O08532-5;Q14BH8;E9Q1X8;O08532-2;O08532-4;O08532;O08532-3;Q8C6Y3	O08532-5;Q14BH8;E9Q1X8;O08532-2;O08532-4;O08532;O08532-3	Voltage-dependent calcium channel subunit alpha-2/delta-1;Voltage-dependent calcium channel subunit alpha-2-1;Voltage-dependent calcium channel subunit delta-1	Cacna2d1	29.861	29.9832	30.24	30.1899	30.3611	30.3372	30.6194	30.8039	31.0077	38	36	36	39.7	39.7	39.7	123.26	0	220.98	8953700000	245	2.47068	0.0111791
807	O08539;Q6P1B9;O08539-2;Q8C5M9	O08539;Q6P1B9;O08539-2	Myc box-dependent-interacting protein 1	Bin1	31.9266	32.0083	31.9092	32.4972	32.3978	32.4446	32.2387	32.3954	32.2775	30	30	28	57.3	57.3	55.8	64.469	0	294.41	29530000000	479	3.73398	0.00132871
808	O08576;O08576-3;O08576-2;O08576-4	O08576;O08576-3;O08576-2;O08576-4	RUN domain-containing protein 3A	Rundc3a	28.9323	28.694	28.8668	28.3561	28.1425	28.143	28.6626	28.9764	28.9325	17	17	16	50.4	50.4	48.9	50.018	0	145.02	2206200000	111	2.66275	0.00793673
809	O08579;I7HJS1;Q3THM8;B7FAU5;D6RFS0	O08579;I7HJS1;Q3THM8	Emerin	Emd	28.2571	28.3665	28.9641	28.9704	28.6748	28.5089	27.4184	27.4706	27.7508	13	13	13	66.8	66.8	66.8	29.435	0	98.509	2027600000	60	2.36204	0.0134088
810	O08583;O08583-2;Q9JJW6-2	O08583;O08583-2;Q9JJW6-2	THO complex subunit 4;Aly/REF export factor 2	Alyref;Alyref2	30.2257	29.7443	29.5978	31.3543	30.8322	31.2269	28.7137	28.4479	27.8771	10	10	5	50.2	50.2	27.1	26.94	0	323.31	10158000000	208	3.69578	0.00141658
811	O08599;Z4YL99	O08599;Z4YL99	Syntaxin-binding protein 1	Stxbp1	36.3036	36.2448	36.1405	35.9306	35.9045	35.9964	36.7461	36.6522	36.7645	59	59	5	82	82	7.2	67.568	0	323.31	484810000000	4552	4.72317	0.000276396
812	O08599-2	O08599-2	Syntaxin-binding protein 1	Stxbp1	30.8971	30.6786	30.6551	30.5154	30.2249	30.2989	30.7328	30.8451	31.0756	57	4	4	80.8	7.1	7.1	68.735	0	24.647	10053000000	339	1.89518	0.0305125
813	Q3TPL4;O08688;Q3U2P3;Q3TDS7;Q3UTF3;D3YU84	Q3TPL4;O08688;Q3U2P3;Q3TDS7	Calpain-5	Capn5	28.0773	28.2522	28.3149	28.47	28.7744	28.8893	28.3228	28.2539	28.1712	19	19	19	37.8	37.8	37.8	72.954	0	57.95	1812900000	91	1.92892	0.0287794
814	O08739;Q922J7;F6XQD0;D3Z4N3;Q3V1D3;D3YU73;H3BIY4	O08739;Q922J7	AMP deaminase 3	Ampd3	27.8684	27.6943	28.0748	27.3746	27.3566	27.6095	28.2508	28.4896	28.4516	24	24	24	34.2	34.2	34.2	88.651	0	42.542	1583000000	75	3.04501	0.00412986
815	Q3UQ08;O08747;O08747-2;Q3TPN7;E9PVI4;Q3URW2;Q3UTY3	Q3UQ08;O08747;O08747-2;Q3TPN7;E9PVI4;Q3URW2;Q3UTY3	Netrin receptor UNC5C	Unc5c	26.4615	26.667	26.992	25.8743	26.0403	25.9325	26.6505	26.7859	27.1398	10	8	8	15.4	13.3	13.3	105.3	0	10.439	517730000	39	2.33432	0.0140478
816	O08749;Q3TIE8	O08749;Q3TIE8	Dihydrolipoyl dehydrogenase, mitochondrial;Dihydrolipoyl dehydrogenase	Dld	34.0694	34.1134	34.0383	34.3171	34.3471	34.4614	33.8984	33.5362	33.626	26	26	26	73.9	73.9	73.9	54.272	0	323.31	105910000000	1216	2.91214	0.00514691
817	O08847;P08775;Q3TC95	O08847;P08775	DNA-directed RNA polymerase;DNA-directed RNA polymerase II subunit RPB1	Polr2a	30.2265	29.9116	30.3802	30.7128	30.5265	30.652	28.3536	28.2357	28.451	57	57	57	38.3	38.3	38.3	216.76	0	323.31	6170800000	241	5.27534	0.000129087
818	Q80W12;Q3TJ75;O08848;Q8R562	Q80W12;Q3TJ75;O08848;Q8R562	60 kDa SS-A/Ro ribonucleoprotein	Trove2	29.7208	29.5722	29.3342	29.4912	29.1607	29.1078	29.9156	29.8119	29.7249	15	15	15	40.9	40.9	40.9	60.171	0	162.95	3865400000	111	1.68476	0.0440063
819	Q3UUF0;O08914;Q8C541;Q8BRM1;Q8K4H2	Q3UUF0;O08914;Q8C541;Q8BRM1	Fatty-acid amide hydrolase 1	Faah	29.4468	29.889	29.8688	31.2685	30.782	30.8279	30.234	30.0166	30.1722	21	21	21	60.5	60.5	60.5	58.491	0	249.97	7735100000	218	2.85379	0.00568265
820	O08915;D3YW40	O08915;D3YW40	AH receptor-interacting protein	Aip	28.5492	28.6539	28.6072	28.1507	28.0075	27.8825	28.4285	28.5518	28.6871	13	13	13	48.8	48.8	48.8	37.605	0	40.078	2080700000	81	2.94558	0.00488466
821	Q540I4;O08917;Q3TJS0;G3UYU4;Q6Y9S2;G3UZZ5;G3UWW8;G3XA73	Q540I4;O08917;Q3TJS0;G3UYU4;Q6Y9S2	Flotillin-1	Flot1	29.9933	29.6022	29.771	29.6974	29.6106	29.5266	30.3545	30.2245	30.071	21	21	21	65	65	65	47.513	0	204.73	5907900000	232	2.19811	0.0178574
822	Q3TPX5;O08989;D3Z2V6	Q3TPX5;O08989;D3Z2V6	Ras-related protein M-Ras	Mras	28.7683	28.8202	28.9424	28.348	28.13	28.098	29.366	29.2643	29.2138	14	14	14	73.1	73.1	73.1	23.901	0	40.804	3305100000	99	4.37461	0.000483868
823	Q6RI64;O09061	Q6RI64;O09061	Proteasome subunit beta type;Proteasome subunit beta type-1	Psmb1	31.425	31.1938	31.2059	30.8645	30.8285	30.445	31.3282	31.4009	31.24	13	13	13	54.2	54.2	54.2	26.372	0	290.08	11858000000	248	2.2114	0.0174468
824	Q58E49;O09106	Q58E49;O09106	Histone deacetylase;Histone deacetylase 1	Hdac1	26.8734	27.699	27.2543	28.8061	28.5458	28.2274	25.9956	26.5247	26.0242	14	7	1	38.4	25.9	3.7	55.074	0	80.897	1168200000	33	3.34507	0.00250837
825	O09114;O09114-2	O09114;O09114-2	Prostaglandin-H2 D-isomerase	Ptgds	27.4229	27.609	27.6973	25.0526	25.8931	24.6337	27.4342	26.863	26.0067	7	7	7	51.3	51.3	51.3	21.066	0	15.138	698720000	28	2.25671	0.0160455
826	Q8BJC1;O09126	Q8BJC1;O09126	Semaphorin-4D	Sema4d	27.3801	27.3669	27.5347	26.8471	27.3888	27.1845	29.1611	29.3114	28.991	16	16	16	23	23	23	88.813	0	67.887	1786500000	69	4.57933	0.000346268
827	O09131;D3Z1Q9;Q9D2J1;Q9D2S1;Q8BW12;Q8K2Q2	O09131	Glutathione S-transferase omega-1	Gsto1	29.274	28.9395	29.2115	28.1913	28.0733	28.3901	28.8081	28.1029	28.2162	12	12	12	57.9	57.9	57.9	27.497	0	20.051	2409800000	94	2.00188	0.0253115
828	Q3TBM1;O09159;Q3TB95	Q3TBM1;O09159;Q3TB95	Alpha-mannosidase;Lysosomal alpha-mannosidase	Man2b1	24.5972	24.6605	25.0147	25.4001	24.7761	24.9771	24.1622	23.8918	24.1882	8	8	8	9.4	9.4	9.4	114.62	0	9.379	155840000	16	2.13535	0.0200468
829	Q4FJZ6;Q3T9P2;O09172;H3BJA3;F6VNW5	Q4FJZ6;Q3T9P2;O09172;H3BJA3	Glutamate--cysteine ligase regulatory subunit	Gclm	28.7798	28.8529	28.8355	28.5286	28.4265	28.4172	29.0798	28.8135	28.7911	9	9	9	39.4	39.4	39.4	30.534	0	48.021	2653500000	109	2.39966	0.0126359
830	Q571A6;O35066;Q3UZU0;Q3UT07	Q571A6;O35066;Q3UZU0	Kinesin-like protein;Kinesin-like protein KIF3C	Kif3c	27.7496	27.4875	27.2913	26.6139	26.791	26.3871	28.1503	27.9202	28.1333	18	18	11	24.4	24.4	16.5	93.871	0	80.814	1123400000	53	3.61147	0.0016176
831	Q3TMU8;O35098;O35098-2;D3Z360	Q3TMU8;O35098;O35098-2	Dihydropyrimidinase-related protein 4	Dpysl4	33.3692	33.3353	33.5147	33.1155	33.0911	33.0376	33.638	33.6637	33.7259	36	34	33	86.2	82.7	81.5	61.927	0	323.31	69403000000	1332	4.0219	0.000837701
832	O35114;Q3TCS7	O35114	Lysosome membrane protein 2	Scarb2	28.2709	28.1185	28.8099	29.0555	29.0887	28.8561	27.3605	27.6118	27.698	11	11	11	26.8	26.8	26.8	54.043	0	72.834	1850800000	59	2.97801	0.00464016
833	O35127	O35127	Protein C10	Grcc10	26.7336	27.425	26.914	27.2524	27.0553	27.5047	27.8365	27.7428	27.8774	6	6	6	81.7	81.7	81.7	13.194	0	31.272	1222800000	51	1.70311	0.0426149
834	Q3V235;O35129;Q3V2V2;F6QPR1;F6Q8V7	Q3V235;O35129;Q3V2V2	Prohibitin-2	Phb2	33.3859	33.5172	33.4006	33.6874	33.513	33.6384	33.241	33.3013	33.2413	21	21	21	75.3	75.3	75.3	33.296	0	323.31	60733000000	803	2.60942	0.00873025
835	Q542P8;O35130	Q542P8;O35130	Ribosomal RNA small subunit methyltransferase NEP1	Emg1	26.3396	25.8882	25.9531	27.1502	26.6057	25.7959	24.8387	24.6075	24.7752	5	5	5	30.7	30.7	30.7	26.974	0	18.803	366000000	18	2.27772	0.0154517
836	O35136;O35136-2;Q3V1M4;Q71VC5	O35136;O35136-2	Neural cell adhesion molecule 2	Ncam2	30.1828	29.9574	30.1012	30.1992	30.5406	30.2623	31.2949	31.0218	30.9202	27	27	27	40.9	40.9	40.9	93.203	0	239.15	9006800000	232	3.08443	0.00386062
837	O35216;D6RJ71;D6RCV6	O35216	Histone H3-like centromeric protein A	Cenpa	25.6914	25.3633	25.8616	24.9208	26.4518	27.0864	23.3151	22.5365	23.8633	3	3	3	21.6	21.6	21.6	15.509	0	7.9983	352640000	23	2.13633	0.0200098
838	O35218;Q3US33;Q3URN8;Q3UGU6;Q8C6K6	O35218;Q3US33;Q3URN8;Q3UGU6	Cleavage and polyadenylation specificity factor subunit 2	Cpsf2	27.9837	26.9233	26.2808	28.7047	28.1103	27.3724	25.8999	26.0362	24.5007	21	21	21	33	33	33	88.382	0	48.692	964390000	42	1.69377	0.0432998
839	Q2M4G8;O35239	Q2M4G8;O35239	Protein-tyrosine-phosphatase;Tyrosine-protein phosphatase non-receptor type 9	Ptpn9	28.3151	28.5431	28.88	27.3272	27.3356	27.8467	29.0972	29.4152	29.1813	21	21	21	43.2	43.2	43.2	67.969	0	70.102	2303400000	97	3.30416	0.0026723
840	Q3USE0;O35250;Q69ZS4;A2AAN0;Q7TPT3;Q542L0;Q3TIP4;O35250-2;A2AAN3;A2AAN4	Q3USE0;O35250;Q69ZS4;A2AAN0;Q7TPT3;Q542L0;Q3TIP4;O35250-2	Exocyst complex component 7	Exoc7;mKIAA1067	29.1941	29.2829	28.9944	28.2671	28.3705	28.5906	29.5007	29.7292	29.2945	27	27	27	41.2	41.2	41.2	79.959	0	84.818	2941600000	122	3.09999	0.00377067
841	Q3UKJ6;Q3TFE5;O35286;Q497W9;Q3UDX4;Q3THD5	Q3UKJ6;Q3TFE5;O35286;Q497W9;Q3UDX4	Pre-mRNA-splicing factor ATP-dependent RNA helicase DHX15	Dhx15	31.4973	31.6253	31.535	31.9395	31.7831	31.6295	29.8214	29.8119	29.5815	41	41	40	55.3	55.3	54.2	91.006	0	269.84	15911000000	442	5.73267	7.12612e-05
842	Q9D8S5;O35326;Q5U448;S4R2G3	Q9D8S5;O35326;Q5U448	Serine/arginine-rich splicing factor 5	Srsf5	28.9007	28.4825	28.7641	29.0751	29.5511	29.8087	27.0357	27.2704	27.1163	7	6	6	28.1	24.8	24.8	30.978	0	80.711	3999700000	65	4.05694	0.00078869
843	Q8BH30;O35345;Q4FJZ2	Q8BH30;O35345;Q4FJZ2	Importin subunit alpha;Importin subunit alpha-7	Kpna6	27.9073	27.9062	27.9593	27.5912	27.9453	27.9096	28.546	28.4225	28.2872	16	10	10	33.8	23.1	23.1	59.964	0	71.509	1829300000	61	2.45222	0.0115251
844	O35381;D3Z7M9;D3YYE1;F6UFG6;Q64G17	O35381;D3Z7M9;D3YYE1;F6UFG6	Acidic leucine-rich nuclear phosphoprotein 32 family member A	Anp32a	32.9968	32.9991	32.49	32.7209	32.8144	32.7206	30.7156	30.6974	30.2828	17	17	14	53.4	53.4	47	28.537	0	323.31	31500000000	425	4.6057	0.000330521
845	Q69ZD1;O35382;Q8CEG7;Q8CA11;Q8C391;Q9CXE1;Q9CWI0;B8JK81;Q3TP05;Q8K371	Q69ZD1;O35382;Q8CEG7;Q8CA11	Exocyst complex component 4	Exoc4	29.3059	29.2948	29.2683	29.0008	28.5577	28.8745	29.5693	29.7482	29.4584	29	29	20	36.2	36.2	27.1	110.77	0	323.31	3452800000	150	2.58964	0.00902462
846	Q543Q7;O35393	Q543Q7;O35393	Ephrin-B3	Efnb3	24.2322	24.3836	24.9549	27.0984	27.3715	26.8792	23.2986	24.436	25.0005	9	9	9	35.6	35.6	35.6	35.884	0	24.021	329050000	21	2.84176	0.00579919
847	O35409;Q0VDM6;Q3UZV6;Q32MS9;G3UWC2;Q9CZR2	O35409;Q0VDM6	Glutamate carboxypeptidase 2	Folh1	28.801	28.7914	29.0217	28.2348	28.4337	28.3123	28.8791	28.8975	28.9886	21	21	19	37.4	37.4	34.8	84.573	0	62.919	2122900000	113	3.20584	0.00315163
848	O35465-2;O35465;C9K0Z7;F6WP10;D3Z597	O35465-2;O35465;C9K0Z7	Peptidyl-prolyl cis-trans isomerase FKBP8	Fkbp8	29.8032	29.99	30.039	30.4635	30.2	30.3091	29.6273	29.8906	29.7555	14	14	14	45.9	45.9	45.9	43.615	0	106.61	6337200000	152	2.32697	0.0142151
849	Q8C8K0;Q8C4U8;O35474;O35474-2	Q8C8K0;Q8C4U8;O35474	EGF-like repeat and discoidin I-like domain-containing protein 3	Edil3	24.5162	25.0081	25.1253	25.5463	26.2391	26.5089	25.2217	24.9398	25.0895	7	7	7	20.3	20.3	20.3	42.522	0	32.396	236870000	20	1.93957	0.0282407
850	Q5D0A4;Q497P1;O35526;D6RFB9	Q5D0A4;Q497P1;O35526;D6RFB9	Syntaxin-1A	Stx1a	27.3876	27.5018	27.0568	27.1973	27.1542	26.5387	28.1599	27.974	28.0036	13	11	11	51.9	47.4	47.4	32.923	0	80.761	1479400000	60	2.2427	0.016484
851	Q49S98;O35633-2;O35633;Q3TQ45	Q49S98;O35633-2;O35633	Vesicular inhibitory amino acid transporter	Slc32a1	31.5553	31.627	31.7384	31.8178	31.6664	31.6744	31.3975	31.5321	31.2719	18	18	18	40.4	40.4	40.4	57.38	0	323.31	19795000000	371	1.6437	0.0472923
852	O35643;Q5SVG5;Q5SVG4;Q3U1K9;Q3TVN4;Q6NXY3	O35643;Q5SVG5;Q5SVG4;Q3U1K9;Q3TVN4	AP-1 complex subunit beta-1;AP complex subunit beta	Ap1b1	32.3425	32.2418	32.2636	32.259	32.1825	32.0793	32.4289	32.3825	32.3792	60	31	1	60.4	39.9	1.4	103.93	0	323.31	28345000000	514	1.86761	0.0320197
853	Q0VE46;O35682	Q0VE46;O35682	Myeloid-associated differentiation marker	Myadm	29.6088	29.7655	30.0538	28.7156	28.949	28.8863	30.3099	30.4568	30.0493	4	4	4	15.6	15.6	15.6	35.284	0	81.782	3979800000	153	3.57872	0.00171146
854	O35685	O35685	Nuclear migration protein nudC	Nudc	29.7785	30.3126	29.7786	28.8761	29.2648	28.8243	29.1742	29.4975	29.5835	17	17	17	54.2	54.2	54.2	38.358	0	68.875	4400000000	95	1.97012	0.026713
855	O35691;Q3TUQ5;Q9CV89	O35691;Q3TUQ5;Q9CV89	Pinin	Pnn	29.312	29.4394	29.174	30.0033	29.9668	30.108	27.5356	28.1195	27.8614	22	22	22	29.7	29.7	29.7	82.435	0	173.58	4675300000	98	4.64469	0.000312313
856	Q811L7;Q8C2Q7;O35737;Q3TNG9	Q811L7;Q8C2Q7;O35737;Q3TNG9	Heterogeneous nuclear ribonucleoprotein H;Heterogeneous nuclear ribonucleoprotein H, N-terminally processed	Hnrnph1	32.9757	32.914	33.0625	33.5659	33.6632	33.6663	31.5229	31.1775	31.243	25	25	12	66.4	66.4	38.1	49.199	0	323.31	57656000000	851	6.0252	5.46631e-05
857	O35841;REV__Q3UUW3;REV__Q3U513;REV__E9Q8I1;REV__P51450-2;REV__Q3TVH3;REV__P51450	O35841	Apoptosis inhibitor 5	Api5	31.1895	31.3153	31.0917	31.2506	31.5732	31.3863	28.8097	29.1447	28.8446	29	29	1	54.4	54.4	2.4	56.784	0	323.31	10966000000	234	5.68512	7.38587e-05
858	Q9ESU8;Q8BXT5;Q3UTP8;Q3US35;O35874;Q5SSP3	Q9ESU8;Q8BXT5;Q3UTP8;Q3US35;O35874;Q5SSP3	Amino acid transporter;Neutral amino acid transporter A	Slc1a4	30.507	30.7741	30.793	30.1907	30.1695	30.3114	30.9908	31.0415	31.0026	11	11	11	27.6	27.6	27.6	56.031	0	280.35	10005000000	203	3.58344	0.0016997
859	Q3UG11;Q3TUF3;O35887;Q6XLQ8;Q3TL33;G3V004;Q3TQD1;G3UWR0;G3UWV3;G3UXA8;G3UXA3;G3UY49;G3UYI3	Q3UG11;Q3TUF3;O35887;Q6XLQ8;Q3TL33;G3V004;Q3TQD1;G3UWR0;G3UWV3	Calumenin	Calu	28.2513	28.1924	28.39	28.661	28.7459	28.5053	27.8589	27.5627	27.8577	14	14	14	57.1	57.1	57.1	37.064	0	97.972	2165900000	69	3.21021	0.0031298
860	Q3U9X2;Q9ES84;O35901;O35900;Q9EP83	Q3U9X2;Q9ES84;O35901;O35900;Q9EP83	U6 snRNA-associated Sm-like protein LSm2	Lsm2	28.1002	28.7609	28.9824	29.5502	28.9427	29.8677	27.219	26.3317	27.3787	3	3	3	60	60	60	10.834	0	72.424	2401900000	53	2.59905	0.00887868
861	O35926;Q496T6	O35926;Q496T6	Cyclin-dependent kinase 5 activator 2	Cdk5r2	23.814	23.7859	23.2467	22.7771	23.458	23.2903	24.9837	24.1286	24.2779	2	2	2	6.5	6.5	6.5	38.923	0.00086009	3.417	68771000	6	1.78828	0.0367407
862	O35954;D3YXW5	O35954	Membrane-associated phosphatidylinositol transfer protein 1	Pitpnm1	31.6366	31.7425	31.7144	31.3739	31.1397	31.2235	32.2635	32.2004	32.2359	38	38	37	44.3	44.3	43.7	134.94	0	323.31	19870000000	563	4.85469	0.000226974
863	O35969;O35969-2	O35969;O35969-2	Guanidinoacetate N-methyltransferase	Gamt	27.224	27.2739	27.0486	28.4294	28.355	28.1737	27.4003	26.9218	26.9743	10	10	10	67.4	67.4	67.4	26.336	0	42.042	1269800000	56	3.52208	0.00186486
864	O54724;Q3U4N4;Q3TER0	O54724	Polymerase I and transcript release factor	Ptrf	28.3734	28.5074	28.478	27.6593	27.8371	27.9633	28.889	28.7128	28.7469	13	13	13	39.5	39.5	39.5	43.953	0	114.26	2213800000	107	3.92922	0.000967928
865	O88325;O54752	O88325;O54752		Naglu	26.3646	26.8049	26.6565	26.642	26.7743	26.7883	25.8494	25.5984	25.781	9	9	9	16.1	16.1	16.1	82.595	0	8.0343	567700000	26	3.33131	0.00256306
866	O54774;Q3U237;Q3UR54;Q8CGH7;Q05CQ3;Q3U1P6	O54774;Q3U237;Q3UR54;Q8CGH7;Q05CQ3	AP-3 complex subunit delta-1	Ap3d1	32.397	32.388	32.3873	32.2321	32.069	32.0941	32.6543	32.5713	32.6196	51	51	51	50.7	50.7	50.7	135.08	0	323.31	28605000000	677	3.87076	0.00106716
867	O54824;Q3UZ81;O54824-2	O54824;Q3UZ81;O54824-2	Pro-interleukin-16;Interleukin-16	Il16	27.7319	27.6334	28.2428	27.6307	27.577	27.6532	27.1757	27.0163	27.0955	19	19	19	19.5	19.5	19.5	141.43	0	52.937	1165200000	61	2.11529	0.0207258
868	O54829;Q45FE3	O54829	Regulator of G-protein signaling 7	Rgs7	30.304	30.0037	29.6391	29.5913	29.388	29.3095	30.6953	30.672	30.1687	19	16	1	43.1	36.5	1.7	54.791	0	58.013	6133700000	125	2.09294	0.0215183
869	Q545V8;O54833;Q8BPF9;Q8CDH5;Q8CEL6	Q545V8;O54833;Q8BPF9	Casein kinase II subunit alpha	Csnk2a2	29.47	29.3861	28.9888	29.5409	29.2794	29.2173	30.0538	29.8391	29.8321	17	16	16	55.4	53.7	53.7	41.215	0	126.59	5071700000	157	1.86961	0.0319297
870	O54916;D3Z2E3;E9Q632;F6R6F1;O54916-4;O54916-3;D6RIN6;F6YT69;F7AB82;O54916-2	O54916;D3Z2E3;E9Q632;F6R6F1;O54916-4;O54916-3	RalBP1-associated Eps domain-containing protein 1	Reps1	28.15	28.2181	28.3822	27.4981	27.5128	27.754	28.4324	28.605	28.7437	19	19	18	27.8	27.8	26.5	86.518	0	62.164	1836300000	80	3.45925	0.0020745
871	O54941;C0IMX3;C0IMX0;C0IMW9;C0IMX1	O54941	SWI/SNF-related matrix-associated actin-dependent regulator of chromatin subfamily E member 1	Smarce1	28.4704	27.908	27.052	29.1201	29.1285	28.237	26.3154	26.6316	26.3012	10	9	9	27.5	25.8	25.8	46.638	0	85.673	1851400000	58	2.42849	0.0120401
872	O54962	O54962	Barrier-to-autointegration factor;Barrier-to-autointegration factor, N-terminally processed	Banf1	28.5629	28.0487	27.7517	29.7235	29.403	29.1751	27.5759	27.3357	27.2098	5	5	5	46.1	46.1	46.1	10.102	0	44.585	2688500000	47	3.3112	0.00264675
873	O54991;Q3U428	O54991;Q3U428	Contactin-associated protein 1	Cntnap1	33.039	32.8561	32.8253	32.7877	32.7255	32.7992	33.5951	33.5784	33.5813	59	59	59	49.6	49.6	49.6	156.31	0	323.31	46651000000	1118	4.77465	0.000255776
874	Q921R1;Q3T9U8;O55026;O55026-2	Q921R1;Q3T9U8;O55026	Ectonucleoside triphosphate diphosphohydrolase 2	Entpd2	26.4394	26.5377	26.8747	27.0429	26.4331	26.1753	28.2262	28.3808	28.3177	10	10	10	21	21	21	54.319	0	56.702	714690000	34	3.30089	0.00268143
875	O55029	O55029	Coatomer subunit beta	Copb2	30.6388	30.9037	30.8909	30.6324	30.2448	30.4414	29.9147	29.935	29.9541	40	40	40	60.4	60.4	60.4	102.45	0	222.47	8482300000	303	3.08034	0.00389158
876	O55033;Q8BQ28	O55033;Q8BQ28	Cytoplasmic protein NCK2	Nck2	26.8908	27.6953	27.5449	26.831	26.8002	26.9907	28.0487	28.1209	28.2445	12	11	11	39.2	37.1	37.1	42.879	0	32.049	881860000	34	2.53143	0.0100236
877	O55042-2;O55042	O55042-2;O55042	Alpha-synuclein	Snca	33.7047	33.8402	33.7277	32.1936	32.3523	32.6578	33.7586	33.7283	33.7802	13	13	8	69.4	69.4	53.7	12.345	0	323.31	57583000000	379	4.4665	0.000420305
878	O55060;D3Z380;D3Z217;D3YWK6;D6RIK3;D3Z0R1	O55060;D3Z380;D3Z217;D3YWK6	Thiopurine S-methyltransferase	Tpmt	27.4405	27.8901	27.7598	26.7929	27.0853	26.8238	28.4369	28.2084	28.2915	15	15	15	69.2	69.2	69.2	27.585	0	46.019	1300600000	93	3.70739	0.0013927
879	O55091	O55091	Protein IMPACT	Impact	29.0972	28.9543	29.4438	27.5428	27.8723	27.7646	28.7836	28.4715	28.8033	8	8	8	34	34	34	36.276	0	28.497	1963200000	60	3.41487	0.00224447
880	Q3U6D7;O55100-2;O55100	Q3U6D7;O55100-2;O55100	Synaptogyrin-1	Syngr1	31.61	31.9368	31.9053	30.4122	31.4877	30.9287	32.2912	32.1549	32.3918	4	4	4	21.5	21.5	21.5	21.294	0	98.611	19202000000	146	2.1262	0.0203462
881	O55137;Q99L15;Q14DI6;Q53YL1;Q32Q92-2;Q9QYR7-2;Q8BWN8;Q9QYR7;Q91YQ6;Q6Q2Z6	O55137;Q99L15	Acyl-coenzyme A thioesterase 1	Acot1	30.6355	30.6348	30.615	30.2892	30.1735	30.1866	31.0267	31.1576	30.6885	15	15	5	38.2	38.2	12.6	46.135	0	69.659	8662000000	224	2.64145	0.00826661
882	Q8BQV7;Q6ZWX1;O55142;Q9DC85	Q8BQV7;Q6ZWX1;O55142;Q9DC85	60S ribosomal protein L35a	Rpl35a	29.5951	29.2485	28.8328	29.1997	29.1456	29.3472	28.318	28.4121	27.9251	8	8	8	50.9	50.9	50.9	12.563	0	13.535	3411900000	103	2.23658	0.0166518
883	O55143;Q5DTI2;J3KMM5;O55143-2;O54994;Q62268	O55143;Q5DTI2;J3KMM5;O55143-2;O54994	Sarcoplasmic/endoplasmic reticulum calcium ATPase 2;Calcium-transporting ATPase	Atp2a2	35.3304	35.2944	35.1136	34.9803	35.0412	34.9871	35.6893	35.6739	35.6941	62	62	42	55.7	55.7	38.8	114.86	0	323.31	252040000000	3431	4.21591	0.00060604
884	O55201;O55201-2	O55201;O55201-2	Transcription elongation factor SPT5	Supt5h	29.5181	29.4126	29.7579	29.9211	29.8803	29.6993	27.7743	27.8089	27.8178	34	34	34	40.1	40.1	40.1	120.66	0	235.13	4136100000	165	5.72368	7.23275e-05
885	Q3UCK1;Q3UA94;O55236;Q9DCC1;Q3TUK6	Q3UCK1;Q3UA94;O55236;Q9DCC1;Q3TUK6	mRNA-capping enzyme;Polynucleotide 5-triphosphatase;mRNA guanylyltransferase	Rngtt	25.8462	25.3473	25.8171	26.6033	26.0946	25.5303	24.2922	24.4126	23.456	12	12	12	24.3	24.3	24.3	68.731	0	11.632	258680000	25	2.41505	0.0122973
886	O55240;F7CWI9;D3YZQ7;Q8BSF7;D3Z0N7	O55240	11-cis retinol dehydrogenase	Rdh5	26.0694	25.4756	25.4366	25.1223	24.4951	24.1895	24.5982	23.9252	23.8324	6	6	6	23.9	23.9	23.9	34.826	0	14.98	175360000	12	1.97204	0.0266463
887	O70194	O70194	Eukaryotic translation initiation factor 3 subunit D	Eif3d	30.1304	30.1563	30.3736	30.4424	30.3533	30.5345	29.76	29.6152	29.6329	19	19	19	49.5	49.5	49.5	63.988	0	167.32	6424800000	163	3.59177	0.0016774
888	O70251;G3UX43;G3UZ47;M0QWK5;M0QWH8	O70251	Elongation factor 1-beta	Eef1b	31.3328	31.6011	31.5684	31.2412	31.3648	31.6119	30.782	30.5925	30.4323	9	9	9	52	52	52	24.693	0	262.88	13123000000	204	2.91069	0.00515416
889	Q3UK88;Q9EP84;Q792R0;O70296;O70293;O70293-2;Q3TTW2;Q9EPB9;O70291	Q3UK88;Q9EP84;Q792R0;O70296;O70293;O70293-2;Q3TTW2;Q9EPB9	G protein-coupled receptor kinase 6	Grk6;GRK6	27.3125	27.2732	25.9173	26.2589	26.4825	25.9498	28.0477	27.8178	28.0401	8	8	5	19.2	19.2	12.2	62.152	0	20.878	927800000	44	1.8839	0.031076
890	O70299	O70299	Protein mab-21-like 1	Mab21l1	27.0269	27.6984	27.4169	27.8058	27.9202	27.7134	26.2352	26.0536	25.6445	12	12	5	40.7	40.7	22	40.956	0	21.001	780180000	32	3.41844	0.00223208
891	Q3UJC3;O70310	Q3UJC3;O70310	Glycylpeptide N-tetradecanoyltransferase;Glycylpeptide N-tetradecanoyltransferase 1	Nmt1	29.7228	29.7627	29.5616	29.4139	29.3376	29.3748	29.2366	29.1043	29.2264	18	18	13	42.5	42.5	31	56.888	0	98.61	3597400000	147	3.15061	0.00346122
892	Q80TT3;Q3U350;Q3U0V5;Q6PB82;Q3UFT4;O70405;Q8K0Q7	Q80TT3;Q3U350;Q3U0V5;Q6PB82;Q3UFT4;O70405	Serine/threonine-protein kinase ULK1	Ulk1	26.3234	25.8691	25.6136	24.8437	25.5259	25.5236	26.5785	26.462	26.4677	13	13	12	17.8	17.8	17	107.21	0	24.218	317870000	36	2.03913	0.0236535
893	O70421	O70421	Frizzled-1	Fzd1	25.3143	26.2822	24.0522	24.6097	24.3573	24.4522	27.6963	28.4219	28.1751	6	6	6	12.1	12.1	12.1	71.126	0	16.937	589280000	20	2.83925	0.00581845
894	Q542U3;Q3UEU9;O70422;E0CXV5;E0CY64;E0CYM3;E0CYK8	Q542U3;Q3UEU9;O70422;E0CXV5;E0CY64	General transcription factor IIH subunit 4	Gtf2h4	24.0832	24.5182	24.1983	25.8028	24.4393	25.534	22.8076	23.3022	23.4908	5	5	5	16.2	16.2	16.2	52.224	0	15.306	103650000	10	2.23569	0.0166567
895	O70423;O70423-2;A2A4I8;A2A4I9;Q812C9	O70423;O70423-2;A2A4I8	Membrane primary amine oxidase	Aoc3	26.1866	26.9242	26.9084	23.4696	24.0943	24.5216	28.9399	29.1632	28.0015	17	17	17	29.5	29.5	29.5	84.533	0	36.125	847640000	50	3.94601	0.000943079
896	Q9DCD8;Q58EV4;O70435;Q3TEL1;E0CX62;E0CZ34;F8WH02;E0CYL6	Q9DCD8;Q58EV4;O70435;Q3TEL1;E0CX62	Proteasome subunit alpha type;Proteasome subunit alpha type-3	Psma3	30.9749	30.9525	30.8391	29.9314	30.25	30.2126	30.5795	30.7962	30.4083	12	12	12	47.8	47.8	47.8	28.49	0	168.43	9968600000	192	2.61696	0.0086363
897	O70439;Q8BH40;Q9JMJ6;Q9DCE1	O70439;Q8BH40;Q9JMJ6;Q9DCE1	Syntaxin-7	Stx7	29.6828	29.8336	29.8658	29.1924	28.9264	29.4492	30.0693	29.9807	30.2306	10	10	10	51.3	51.3	51.3	29.82	0	318.91	6258300000	97	2.67258	0.007807
898	Q542R8;O70443;Q3UYF9	Q542R8;O70443;Q3UYF9	Guanine nucleotide-binding protein G(z) subunit alpha	Gnaz	30.7723	30.4527	30.8761	30.6789	30.6528	30.586	31.3511	31.5698	31.408	17	16	16	51.8	49.6	49.6	40.849	0	323.31	11435000000	262	3.05162	0.00407885
899	Q8BSN6;O70480	Q8BSN6;O70480	Vesicle-associated membrane protein 4	Vamp4	23.2602	25.2304	24.3895	26.6359	25.8643	26.1507	22.5193	23.8312	24.0532	3	3	3	36.9	36.9	36.9	16.358	0	13.686	362700000	5	1.89612	0.0304799
900	O70481;Q2M4I1;Q3TKQ2;Q497M7;Q3V1R9	O70481;Q2M4I1;Q3TKQ2;Q497M7;Q3V1R9	E3 ubiquitin-protein ligase UBR1	Ubr1	29.0185	29.2018	28.8473	28.4806	28.4809	28.352	29.3444	29.5672	29.3042	34	34	34	23.2	23.2	23.2	200.24	0	162.19	2705300000	155	3.38995	0.00234361
901	Q2M4I5;O70494-3;O70494-2;O70494	Q2M4I5;O70494-3;O70494-2;O70494	Transcription factor Sp3	Sp3	22.484	24.1427	23.488	25.339	26.6218	25.8025	23.6297	24.3952	24.1319	5	5	5	9.4	9.4	9.4	73.206	0	18.462	206760000	9	2.12591	0.0203429
902	O70569;P62264;D3YVF4;D3Z7I1;Q3UJS5	O70569;P62264;D3YVF4;D3Z7I1;Q3UJS5	40S ribosomal protein S14	rps14;Rps14	31.2633	31.3865	31.1153	31.5014	31.6197	31.4394	30.1327	30.2796	30.3148	10	10	10	68.2	68.2	68.2	16.301	0	315.7	14556000000	214	4.76428	0.000260139
903	O70589;B7ZP42;O70589-3;O70589-4;O70589-5;A0A067XG53;O70589-2;Q91VJ0;F6Y9I5;F6ZQR2	O70589;B7ZP42;O70589-3;O70589-4;O70589-5;A0A067XG53;O70589-2	Peripheral plasma membrane protein CASK	Cask	31.5823	31.5499	31.2221	30.8293	30.8294	30.6111	32.3323	32.3344	32.1717	41	41	2	50.4	50.4	4.2	105.11	0	323.31	18948000000	470	4.34735	0.000499474
904	O88271	O88271	Craniofacial development protein 1	Cfdp1	27.9494	28.3083	27.7805	28.6239	29.0993	28.7261	25.0895	25.3989	26.029	5	5	5	24.4	24.4	24.4	32.921	0	176.63	1397400000	27	4.22168	0.000601701
905	O88291;D3YXQ7;O88291-2;D6RG92;O88291-3	O88291;D3YXQ7	DBIRD complex subunit ZNF326	Znf326;Zfp326	28.8471	28.7937	28.7049	29.3942	29.2444	29.3942	27.5921	27.5037	27.5416	16	16	16	37.6	37.6	37.6	65.225	0	44.172	2348700000	76	6.72707	2.40623e-05
906	O88307;Q3U2X9;Q3UV32;Q8C2R1;Q8CE39	O88307	Sortilin-related receptor	Sorl1	30.4691	30.5082	30.7705	30.8321	30.7765	30.786	29.9672	29.9531	29.9191	52	52	52	31.5	31.5	31.5	247.08	0	306.31	7785800000	312	4.01216	0.000852103
907	Q3TJY2;O88342;Q3TE06;Q9DC08;Q9DBM8;Q80ZI9;Q3TNK2;Q3U136	Q3TJY2;O88342;Q3TE06;Q9DC08;Q9DBM8;Q80ZI9;Q3TNK2;Q3U136	WD repeat-containing protein 1	Wdr1	32.8615	32.8137	32.9635	32.634	32.7132	32.8258	33.1564	33.222	33.398	36	36	36	71.9	71.9	71.9	66.406	0	323.31	51847000000	1065	2.76914	0.00659097
908	O88428;Q9QYS0	O88428;Q9QYS0	Bifunctional 3-phosphoadenosine 5-phosphosulfate synthase 2;Sulfate adenylyltransferase;Adenylyl-sulfate kinase	Papss2	24.917	25.1813	24.4392	25.7212	25.8351	25.3776	24.6066	24.1296	23.4856	6	5	5	12.4	10.1	10.1	70.35	0	8.9964	250230000	10	1.98692	0.0259066
909	Q3TI40;O88441;Q3TI19;Q2M4G1;Q8C454	Q3TI40;O88441;Q3TI19;Q2M4G1;Q8C454	Metaxin-2	Mtx2	30.7965	30.9435	30.8281	31.2885	31.8626	31.2802	30.7474	30.8126	30.6925	13	13	13	73	73	73	29.786	0	319.34	12687000000	202	2.04802	0.0232756
910	O88444;Q5DTQ1	O88444	Adenylate cyclase type 1	Adcy1	29.8389	30.01	29.7039	29.8153	29.5804	29.1326	31.0534	31.0141	30.8961	27	27	27	31.1	31.1	31.1	123.37	0	323.31	6437500000	198	3.33586	0.0025427
911	O88485;D3Z0M6;O88485-2;D6Q0F3;Q9CRN8	O88485;D3Z0M6;O88485-2;D6Q0F3	Cytoplasmic dynein 1 intermediate chain 1	Dync1i1	29.9632	30.0907	30.3414	30.7993	30.7519	30.9603	30.1712	30.4691	30.6058	19	19	2	51.6	51.6	7.6	70.724	0	323.31	8256400000	168	2.05556	0.022966
912	Q3UFX9;O88502;Q3UEE9	Q3UFX9;O88502	High affinity cAMP-specific and IBMX-insensitive 3,5-cyclic phosphodiesterase 8A	Pde8a	25.893	25.7675	24.5555	26.5137	26.1937	27.3095	23.624	24.6318	24.0776	13	13	13	22.3	22.3	22.3	96.387	0	34.912	295030000	25	2.1856	0.0182303
913	O88508;O88508-2;G3UXY2;Q3UWR0;G3UZK0;G3UX07;G3UZG8;Q3TYD7;G3UZN5;G3UZF8;G3UZH2;G3UX63;G3UY43;G3UZU0;Q541E5;Q3KR45;O88509-3;O88509-4;O88509-2;O88509	O88508;O88508-2	DNA (cytosine-5)-methyltransferase 3A	Dnmt3a	29.3684	29.6286	29.4891	30.8537	30.7424	30.7754	27.3985	27.387	26.7935	41	41	41	60.1	60.1	60.1	101.67	0	268.97	5235800000	166	5.57515	8.79341e-05
914	Q8R378;O88520	Q8R378;O88520	Leucine-rich repeat protein SHOC-2	Shoc2	25.8656	25.8774	25.8094	27.0824	26.4469	26.5916	27.4207	26.9067	26.7442	8	8	8	28.8	28.8	28.8	58.493	0	77.395	710560000	31	2.2588	0.0159824
915	O88569;O88569-3;O88569-2;B7ZP22	O88569;O88569-3;O88569-2;B7ZP22	Heterogeneous nuclear ribonucleoproteins A2/B1	Hnrnpa2b1	34.359	34.2274	34.711	34.7706	34.7891	34.9359	33.0421	32.9522	33.2721	30	30	29	62.6	62.6	62.6	37.402	0	323.31	147070000000	1761	4.27175	0.000556641
916	Q3ZB20;O88602;S4R2R7	Q3ZB20;O88602	Voltage-dependent calcium channel gamma subunit;Voltage-dependent calcium channel gamma-2 subunit	Cacng2	29.8957	29.8129	30.1109	29.0636	29.6906	29.5567	30.5794	30.5986	30.2181	9	9	7	30.3	30.3	26.3	35.894	0	200.16	5689900000	96	2.20713	0.0175812
917	Q542I7;Q3TX23;O88653	Q542I7;Q3TX23;O88653	Ragulator complex protein LAMTOR3	Lamtor3	27.976	28.1245	27.8478	28.6205	28.6086	28.3907	28.4767	28.1984	28.4633	6	6	6	67.7	67.7	67.7	13.553	0	61.251	1527800000	52	2.1163	0.0206861
918	O88682	O88682		Ncam1	28.8574	28.0111	28.4531	28.2147	28.6705	28.3854	29.7658	29.1781	29.1963	1	1	1	32.3	32.3	32.3	3.512	0	32.266	2766000000	49	1.67388	0.0448883
919	O88712;O88712-2	O88712;O88712-2	C-terminal-binding protein 1	Ctbp1	31.9309	32.0153	31.8305	31.884	32.0371	31.8443	33.0499	32.8368	32.6406	19	19	4	52.2	52.2	11.3	47.744	0	323.31	29172000000	542	3.5178	0.00187265
920	Q8C5N9;O88736	Q8C5N9;O88736	3-keto-steroid reductase	Hsd17b7	26.6306	26.9851	27.1896	28.1413	27.7205	27.8912	27.0668	27.1011	27.5761	7	7	7	30.1	30.1	30.1	40.014	0	65.031	778880000	26	2.00864	0.0250373
921	O88737;O88737-2;V9GX98;Q3UXD6;Q3TUN1	O88737;O88737-2	Protein bassoon	Bsn	33.5919	33.5825	33.9194	32.7089	32.9586	32.9241	34.5457	34.6209	34.7918	157	155	154	57.5	57	56.8	418.84	0	323.31	81858000000	1508	4.6266	0.000320867
922	Q3UEX4;O88741;Q3UTV3;O88741-2	Q3UEX4;O88741;Q3UTV3	Ganglioside-induced differentiation-associated protein 1	Gdap1	30.952	30.9229	30.9134	31.3838	31.4727	31.2996	30.7391	30.9217	30.5143	17	17	17	53.1	53.1	53.1	41.284	0	323.31	15502000000	207	2.69587	0.0075047
923	Q543T5;O88745	Q543T5;O88745	Scrapie-responsive protein 1	Scrg1	25.137	25.5692	24.9444	26.2107	26.0385	26.154	24.8273	25.1952	25.3867	4	4	4	52	52	52	11.173	0	13.126	241360000	11	2.29721	0.014934
924	O88796;Q3TF81;Q6P6M0;Q8K238	O88796;Q3TF81;Q6P6M0;Q8K238	Ribonuclease P protein subunit p30	Rpp30	27.3393	28.0123	27.528	28.8785	28.2584	28.311	25.4165	25.7882	25.8932	10	10	10	49.3	49.3	49.3	29.473	0	48.015	857940000	44	3.98032	0.000897695
925	Q14AE3;O88819	Q14AE3;O88819	Alpha-(1,3)-fucosyltransferase 9	Fut9	24.4688	25.4	25.4959	26.5842	25.8648	26.1571	24.2945	23.8841	24.7787	4	4	4	21.4	21.4	21.4	42.041	0	5.8411	180530000	12	2.12272	0.0204248
926	Q3TD57;O88839-3;O88839-2;O88839;Q8CA82;O88839-4	Q3TD57;O88839-3;O88839-2;O88839;Q8CA82	Disintegrin and metalloproteinase domain-containing protein 15	Adam15	24.0269	24.0159	24.3047	24.6354	24.456	23.8259	25.1845	24.83	25.4066	4	4	4	5.5	5.5	5.5	87.153	0.00044131	3.9724	132320000	11	1.82257	0.0346438
927	Q9QWR7;Q549T4;O88843;Q3V2M2;Q3UMW0	Q9QWR7;Q549T4;O88843	Death domain-containing protein CRADD	Cradd	24.2704	22.6931	23.5889	25.3114	25.4901	24.9708	25.2193	24.8191	24.9887	4	4	4	63.4	63.4	63.4	16.478	0	9.3398	98042000	7	1.99143	0.0257182
928	O88845;O88845-2;O88845-3;Q3TR91	O88845;O88845-2;O88845-3;Q3TR91	A-kinase anchor protein 10, mitochondrial	Akap10	27.852	27.839	28.0382	27.5494	27.5786	27.4866	28.3425	28.1793	28.4128	19	19	19	39.9	39.9	39.9	73.631	0	48.715	1611100000	82	3.65171	0.00150952
929	Q8VCV3;Q3TUM2;O88848;O88848-2;Q3U6U3;D3Z067	Q8VCV3;Q3TUM2;O88848;O88848-2;Q3U6U3;D3Z067	ADP-ribosylation factor-like protein 6	Arl6	27.9917	28.1818	28.0221	27.3712	27.4963	27.2469	28.9994	28.8306	28.8744	9	9	9	62.4	62.4	62.4	21.001	0	30.834	1545600000	64	5.18051	0.000146933
930	Q3U3M5;O88874;Q3U3H2	Q3U3M5;O88874;Q3U3H2	Cyclin-K	Ccnk	25.583	25.6951	26.5539	26.1766	26.4468	27.273	24.3971	24.693	23.8685	6	6	6	16.3	16.3	16.3	64.349	0	29.422	376770000	17	2.41922	0.0122155
931	O88935;O88935-3;W8QPF2	O88935;O88935-3	Synapsin-1	Syn1	35.3033	35.3651	35.6432	34.6153	34.7862	34.8264	35.94	35.8497	36.2713	53	53	6	79.6	79.6	8.9	74.096	0	323.31	268500000000	3383	3.43573	0.00217407
932	O88935-1	O88935-1	Synapsin-1	Syn1	30.4009	30.141	30.5945	28.7758	29.5123	29.3431	30.7789	30.7327	31.4083	48	3	3	77.8	4.6	4.6	70.034	0	138.86	5447600000	146	2.71494	0.0072566
933	O88939-2;O88939;D3Z4C3;B7ZWA9;D3YVF8;D3YZI8	O88939-2;O88939;D3Z4C3;B7ZWA9;D3YVF8	Zinc finger and BTB domain-containing protein 7A	Zbtb7a	25.663	25.6479	24.963	27.7581	27.1083	26.7593	23.7507	23.6828	22.8272	8	8	7	19.1	19.1	14.3	59.778	0	8.6043	421750000	19	3.67638	0.00145016
934	O88952;Q3TTY6;Q3UX93;Q3TS99	O88952;Q3TTY6;Q3UX93;Q3TS99	Protein lin-7 homolog C	Lin7c	30.4567	30.1168	30.035	29.3415	28.9544	29.1421	31.182	30.8997	30.6947	12	7	7	65.5	39.1	39.1	21.834	0	72.611	7581100000	99	3.71473	0.00137234
935	O88958;Q6A0D9;Q3TKA0;Q8BK00;D3Z0R5	O88958;Q6A0D9;Q3TKA0;Q8BK00	Glucosamine-6-phosphate isomerase 1;Glucosamine-6-phosphate isomerase	Gnpda1	29.138	28.9394	29.0617	28.9046	28.6635	28.5294	29.457	29.2011	29.0744	14	11	11	66.4	56.4	56.4	32.549	0	100.67	2723200000	105	1.70936	0.0421166
936	O88983;Q9D0J1;Q8BS59	O88983;Q9D0J1	Syntaxin-8	Stx8	27.0138	26.7998	27.3541	27.2496	26.9976	27.2671	26.1136	26.4013	26.4901	8	8	8	30.5	30.5	30.5	26.925	0	17.058	758730000	53	2.20063	0.0177768
937	Q3U232;Q3U1N0;O89053;Q3U9K3;Q3T9L1;G3UYK8;D3YW57;G3UX53;D3YXM2	Q3U232;Q3U1N0;O89053;Q3U9K3;Q3T9L1;G3UYK8	Coronin;Coronin-1A	Coro1a	31.0096	31.2548	30.8572	30.7856	30.6545	30.3829	31.2712	31.5272	31.3175	20	19	19	51	49.5	49.5	50.959	0	145.3	12078000000	232	2.18817	0.0181457
938	O89079;Q9D1J2;D3Z315;F6YFR7;F6XIG5;E9Q6I5	O89079;Q9D1J2;D3Z315;F6YFR7	Coatomer subunit epsilon	Cope	28.8029	28.8782	28.8552	29.5204	28.775	29.1178	27.9674	27.993	28.0755	17	17	17	82.8	82.8	82.8	34.567	0	91.916	2957500000	97	2.72774	0.00710721
939	Q545K5;O89086;Q8BG13;Q5RJV3;S4R2M6	Q545K5;O89086;Q8BG13	RNA-binding protein 3	Rbm3	30.0478	29.7927	30.3446	31.555	32.1011	31.994	28.5939	28.8681	28.8229	9	9	9	64.7	64.7	64.7	16.604	0	276.54	10544000000	115	4.85772	0.000226523
940	O89112;B2KGR2;Q8CHW0	O89112;B2KGR2	LanC-like protein 1	Lancl1	31.1738	31.1099	31.3776	30.5145	30.7563	30.683	31.3717	31.4822	31.672	19	19	19	47.9	47.9	47.9	45.341	0	204.82	11447000000	283	3.10603	0.00373211
941	Q99KF5;P00493;Q6TDG6	Q99KF5;P00493	Hypoxanthine-guanine phosphoribosyltransferase	Hprt;Hprt1	31.2124	31.2367	30.9793	30.3826	30.3998	30.0659	31.2325	31.0286	30.8395	14	14	14	79.4	79.4	79.4	24.544	0	100.86	11008000000	306	2.70647	0.00736571
942	P00920	P00920	Carbonic anhydrase 2	Ca2	32.924	32.6615	32.7784	33.8116	34.1487	34.0475	31.4431	31.6985	31.8362	14	14	14	64.2	64.2	64.2	29.032	0	323.31	66828000000	532	5.05354	0.0001707
943	P01027;B5APU1;Q207D2;E1APH6;H3BL60;H3BKW9;CON__Q2UVX4	P01027	Complement C3;Complement C3 beta chain;C3-beta-c;Complement C3 alpha chain;C3a anaphylatoxin;Acylation stimulating protein;Complement C3b alpha chain;Complement C3c alpha chain fragment 1;Complement C3dg fragment;Complement C3g fragment;Complement C3d fragment;Complement C3f fragment;Complement C3c alpha chain fragment 2	C3	27.6523	27.8488	27.8953	27.2468	27.7259	26.9225	26.3959	26.2783	26.4043	23	23	18	17.9	17.9	14.6	186.48	0	49.653	774040000	53	2.95496	0.00481517
944	P84244;P02301;E0CZ27	P84244;P02301;E0CZ27	Histone H3.3;Histone H3.3C;Histone H3	H3f3a;H3f3c	35.6973	35.6883	35.5185	36.355	36.5008	36.6287	34.3325	33.937	34.1215	17	17	1	65.4	65.4	23.5	15.328	0	289.77	375270000000	1535	5.42136	0.000102943
945	Q7GIP5;P03899	Q7GIP5;P03899	NADH-ubiquinone oxidoreductase chain 3	mt-Nd3;Mtnd3	24.336	29.4938	23.7123	29.7594	29.7977	29.2089	23.4443	23.6558	23.3222	2	2	2	18.3	18.3	18.3	13.219	0	20.748	4680700000	30	1.737	0.0401284
946	Q9ME04;Q7JCY6;P03911;W0TGY1;F1JVR2;A9UIX0;Q3UPP3;Q3UQ59	Q9ME04;Q7JCY6;P03911;W0TGY1;F1JVR2;A9UIX0;Q3UPP3	NADH-ubiquinone oxidoreductase chain 4	ND4;mt-Nd4;Mtnd4	30.8416	30.1529	30.1981	31.2915	31.3384	30.9415	30.6658	30.2559	30.2995	10	10	10	24	24	24	51.851	0	103.09	9604400000	195	1.64117	0.0475089
947	P03995-2;P03995;A0MTM0;REV__Q05CR0;REV__Q811J2	P03995-2;P03995	Glial fibrillary acidic protein	Gfap	32.8242	32.8079	32.7859	32.7015	32.6212	32.6118	31.4987	31.4063	31.2423	36	34	32	70.6	67.1	65	49.364	0	323.31	37529000000	644	5.91568	5.71852e-05
948	P04370-11;Q542T4;F6TYB7;P04370-6;Q3UGF3;F6RWW8;P04370-8	P04370-11;Q542T4;F6TYB7;P04370-6;Q3UGF3;F6RWW8;P04370-8	Myelin basic protein	Mbp	28.0623	28.0206	30.1044	32.1839	31.5919	32.1364	25.0617	25.143	26.2881	23	3	2	80.7	18.8	5.1	19.552	0	9.1002	9360700000	105	3.67071	0.00146459
949	P04627;Q3UXR0;Q3TQI2;B1AUN8;B1AUP0;Q99N73	P04627;Q3UXR0;Q3TQI2	Serine/threonine-protein kinase A-Raf	Araf	28.7838	28.8442	28.4168	27.4567	27.9677	27.8345	29.0391	29.0968	29.1173	17	13	2	30.1	23.7	5.6	67.581	0	52.504	2555600000	78	3.25408	0.00289186
950	Q53ZN9;Q3TZJ1;Q3TNL6;Q3TAJ4;P04919-2;P04919;Q3U065;Q3TZ12;Q3TZ29;Q3TA19;Q3TZG9;Q3TNH7	Q53ZN9;Q3TZJ1;Q3TNL6;Q3TAJ4;P04919-2;P04919;Q3U065;Q3TZ12;Q3TZ29;Q3TA19;Q3TZG9	Anion exchange protein;Band 3 anion transport protein	Slc4a1	27.9884	28.1629	28.3659	28.4214	28.1086	28.5053	27.5232	27.2782	27.7679	16	16	16	19.8	19.8	19.8	103.13	0	60.914	1710200000	85	2.10833	0.0209999
951	Q9QYT9;Q4FJQ7;Q3TZI7;P04925;Q3UG89;Q3UF68;Q3UBH0	Q9QYT9;Q4FJQ7;Q3TZI7;P04925;Q3UG89;Q3UF68;Q3UBH0	Major prion protein	Prnpb;Prnp	30.0625	30.2735	30.2711	31.1467	30.977	31.0146	30.7144	30.8633	30.9536	11	11	11	48	48	48	28.009	0	174.16	11699000000	122	3.66377	0.00148043
952	P05063;Q3UER1;Q3TJ66;Q91Y97	P05063	Fructose-bisphosphate aldolase C	Aldoc	35.8653	35.9968	36.0451	35.0182	35.1606	35.2292	35.9264	36.0025	36.2019	42	42	34	93.9	93.9	77.7	39.394	0	323.31	450000000000	3989	3.89067	0.00102932
953	P05132;P05132-2;Q8C4J3;Q8CBP8;J9JDU9	P05132;P05132-2	cAMP-dependent protein kinase catalytic subunit alpha	Prkaca	32.0497	32.1717	32.3561	31.7095	31.5535	31.9279	32.4982	32.377	32.3154	21	21	8	53.8	53.8	27.1	40.57	0	240.94	22049000000	389	2.36838	0.0132835
954	P05201;F7ALS6	P05201	Aspartate aminotransferase, cytoplasmic	Got1	35.3611	35.438	35.4637	34.8884	34.9203	35.1024	34.8237	34.7723	34.843	33	33	33	80.6	80.6	80.6	46.247	0	323.31	170440000000	1821	3.76935	0.00125944
955	P05480;Q80XU2;Q3UKD6;F6UND7;P08103-2;P08103;Q3TLX4;Q8BQI4;Q8BPC1;Q0VBH4;E9Q696;A4FUV7;A4FUV6;F8VQL0;Q62270;P06240;Q922K9;P16056	P05480;Q80XU2;Q3UKD6	Neuronal proto-oncogene tyrosine-protein kinase Src;Non-specific protein-tyrosine kinase	Src	30.8481	30.9991	31.0129	30.0732	30.1937	30.0739	31.9194	31.5926	31.5275	26	26	20	59.9	59.9	50.1	60.644	0	252.06	11683000000	265	4.56281	0.000355416
956	P06745;B7ZWL9	P06745;B7ZWL9	Glucose-6-phosphate isomerase	Gpi;Gpi1	34.9833	34.8132	34.8213	34.5086	34.4244	34.4546	34.6984	34.7328	34.8602	36	36	3	62	62	5.4	62.766	0	323.31	141970000000	1905	2.77227	0.00655136
957	P06837	P06837	Neuromodulin	Gap43	31.0915	30.9419	31.5756	30.9675	30.9126	31.3394	32.5838	32.4702	32.8744	19	19	18	84.1	84.1	81.5	23.632	0	323.31	28240000000	303	3.23696	0.00297981
958	Q5NCU4;Q5NCU5;P07214;Q3TXI6;Q5NCU3	Q5NCU4;Q5NCU5;P07214;Q3TXI6	SPARC	Sparc	28.9335	29.0357	29.159	28.234	28.1933	28.2494	29.3084	29.5808	29.841	10	10	10	45.5	45.5	45.5	34.322	0	73.771	3357600000	124	3.72471	0.00134997
959	Q5M9K1;P07309;Q9D6A4	Q5M9K1;P07309;Q9D6A4	Transthyretin	Ttr	30.0818	29.3983	28.8206	23.6251	23.5326	24.3148	23.5543	23.0928	23.4808	7	7	7	66.7	66.7	66.7	15.776	0	22.125	1172800000	39	5.20141	0.000141961
960	Q542G9;P07356;Q3UCD3;Q9CZI7;B0V2N7;B0V2N8;Q99KH3;B0V2N5	Q542G9;P07356;Q3UCD3;Q9CZI7;B0V2N7;B0V2N8;Q99KH3;B0V2N5	Annexin;Annexin A2	Anxa2	30.312	30.299	30.2873	28.5824	28.5391	28.4464	29.9327	29.72	29.8615	21	21	21	59	59	59	38.676	0	97.134	4894400000	139	6.56013	2.90709e-05
961	Q546G4;P07724;K7R066	Q546G4;P07724	Serum albumin	Alb	34.4592	34.659	34.6983	33.2235	33.0657	33.2131	32.2127	32.1744	32.3408	40	40	37	72	72	68.4	68.692	0	323.31	68357000000	904	6.38799	3.39126e-05
962	Q05DU8;Q6NZB3;P07742	Q05DU8;Q6NZB3;P07742	Ribonucleoside-diphosphate reductase;Ribonucleoside-diphosphate reductase large subunit	Rrm1	26.5301	26.3722	26.96	25.7937	25.7656	25.3285	26.7572	27.2485	26.994	11	11	11	20.5	20.5	20.5	86.837	0	27.393	438210000	30	2.67659	0.00778774
963	Q00896;P07758;D3YZL0	Q00896;P07758	Alpha-1-antitrypsin 1-3;Alpha-1-antitrypsin 1-1	Serpina1c;Serpina1a	28.3374	28.172	28.3242	27.056	26.7734	26.5776	26.0787	25.9208	25.7794	10	9	2	27.4	26	4.4	45.823	0	32.271	916690000	42	5.06433	0.000169513
964	P07759;Q03734;E9Q499;Q4V9W0;F2Z405;Q3UE77;Q3UDB3;Q3U1B7;A2RTV1;Q14AS7;G3X8T9;Q3U0Y1;P29621;Q91WP6;Q5I2A0;Q80X76	P07759	Serine protease inhibitor A3K	Serpina3k	28.4735	28.4295	28.7464	27.5159	27.5779	27.3241	26.2498	26.2536	26.1664	10	10	10	31.6	31.6	31.6	46.879	0	63.011	1171400000	50	5.76205	6.86182e-05
965	Q80Y52;P07901;Q3UIF3;Q3TKA2;A0PJ91;Q3TKB9;Q3TJU7;Q3TKG0;Q8C5U3;Q8C2A9;B7ZC50;A2A6A2;B7ZC49;H3BLM8;REV__Q8BL66	Q80Y52;P07901;Q3UIF3;Q3TKA2;A0PJ91;Q3TKB9;Q3TJU7;Q3TKG0;Q8C5U3	Heat shock protein HSP 90-alpha	Hsp90aa1	35.5479	35.3839	35.3551	35.0256	34.8406	34.9745	34.9577	35.1526	35.141	63	63	42	66.6	66.6	51.2	84.787	0	323.31	237200000000	2639	2.49839	0.0106169
966	P07903;E9PUM0;H3BLF5	P07903;E9PUM0	DNA excision repair protein ERCC-1	Ercc1	25.3213	25.6747	25.1633	25.4324	26.5248	26.3557	24.6965	24.0127	22.7623	6	6	6	23.8	23.8	23.8	32.909	0	30.704	260790000	13	1.79428	0.0363244
967	P07934;D3Z472;D3Z1B5	P07934	Phosphorylase b kinase gamma catalytic chain, skeletal muscle/heart isoform	Phkg1	28.138	28.0172	27.8003	27.6477	27.2629	27.7306	28.6359	28.3853	28.7743	15	15	13	46.4	46.4	42.3	44.959	0	23.931	1513500000	68	2.61067	0.00871939
968	P08003	P08003	Protein disulfide-isomerase A4	Pdia4	31.1328	30.9648	31.0894	30.9429	31.1353	31.1589	30.3843	30.4733	30.5364	35	35	35	47.5	47.5	47.5	71.982	0	184.83	11957000000	300	3.47241	0.00202366
969	P08030;Q61320	P08030	Adenine phosphoribosyltransferase	Aprt	26.48	26.7128	25.873	25.6801	25.4587	25.7427	27.0088	26.7786	27.3775	7	7	7	50	50	50	19.724	0	17.205	604820000	45	2.34984	0.0136941
970	Q91V38;Q3UAD6;P08113;Q3UBU0;Q3TUD6;Q8CCY5;F7C312;Q8C2R2;Q9CW12	Q91V38;Q3UAD6;P08113;Q3UBU0;Q3TUD6;Q8CCY5;F7C312	Endoplasmin	Hsp90b1	33.1628	33.1041	32.8606	33.2887	33.1511	32.8948	32.588	32.6726	32.353	52	50	50	59	57.2	57.2	92.489	0	323.31	50364000000	806	1.85791	0.032543
971	Q6GTX3;Q4FK40;Q3UBS0;Q3TXU4;P08226;Q3TX45;Q3UEE7;G3UZT1;G3UWN5;G3UZM8;E9Q327;Q3UF21;G3UWW2;D3YUF0;D3Z2C5;CON__Q03247;Q3KP75;Q8VHG0	Q6GTX3;Q4FK40;Q3UBS0;Q3TXU4;P08226;Q3TX45;Q3UEE7	Apolipoprotein E	Apoe	31.353	31.3263	31.5283	30.585	30.9121	30.9126	31.1584	31.1203	31.0091	22	22	22	64.6	64.6	64.6	35.852	0	323.31	13578000000	212	2.33669	0.0139906
972	P08228;Q8C355	P08228	Superoxide dismutase [Cu-Zn]	Sod1	31.2501	31.4819	31.071	32.2755	31.8845	32.1464	30.2046	30.473	30.594	8	8	8	51.9	51.9	51.9	15.942	0	280.89	16463000000	217	3.78993	0.00120934
973	P08551;Q05DD2	P08551;Q05DD2	Neurofilament light polypeptide	Nefl	33.8272	33.7646	33.6333	35.5442	35.411	35.653	32.0488	31.9318	32.1855	50	45	45	74.8	71.1	71.1	61.508	0	323.31	143350000000	1387	7.05521	1.64703e-05
974	P08553;D3YZ35;REV__Q8R344	P08553;D3YZ35	Neurofilament medium polypeptide	Nefm	33.3883	33.2971	33.4303	35.4064	35.3449	35.5302	32.0341	32.1787	31.9958	57	57	51	55.5	55.5	53.1	95.915	0	323.31	157350000000	1064	7.72969	9.38298e-06
975	P08752;Q8JZT4;Q922Y6;Q8BSY7;B2RVZ3;Q3V3I2	P08752	Guanine nucleotide-binding protein G(i) subunit alpha-2	Gnai2	34.187	34.3174	34.1729	34.1129	34.2349	34.3251	34.6557	34.544	34.5846	23	23	14	67.3	67.3	43.7	40.489	0	323.31	117050000000	1406	2.63391	0.00839283
976	P09055;P09055-2;Q8BUD1	P09055;P09055-2	Integrin beta-1	Itgb1	30.1321	30.01	29.9131	29.5955	29.6373	29.6811	30.0762	30.4158	30.4545	19	19	19	29.8	29.8	29.8	88.231	0	168.27	6271600000	166	2.54466	0.00978909
977	Q3UDR2;Q3TWE3;Q3THC3;Q3TF72;P09103;Q3URP6;Q3UBY9;Q3UJA8;Q3UA23;Q3TIM0;Q3U738;Q3TGS0;Q3TT76;Q3TIQ5;E9Q8G8	Q3UDR2;Q3TWE3;Q3THC3;Q3TF72;P09103;Q3URP6;Q3UBY9;Q3UJA8;Q3UA23;Q3TIM0;Q3U738;Q3TGS0;Q3TT76	Protein disulfide-isomerase	P4hb	31.677	31.6538	31.577	31.835	32.0392	31.8165	31.5307	31.6718	31.4302	28	28	28	61.4	61.4	61.4	56.6	0	323.31	24213000000	504	1.82805	0.03427
978	Q8CD23;Q3TL52;P09405;Q3TT41;Q3TGR3;Q8CE30;Q9CT46	Q8CD23;Q3TL52;P09405;Q3TT41;Q3TGR3;Q8CE30	Nucleolin	Ncl	33.3039	33.4895	33.594	34.1363	34.0415	34.1321	31.4607	31.4861	31.7708	34	34	34	37.9	37.9	37.9	76.864	0	323.31	47894000000	534	5.96031	5.51725e-05
979	Q3U3Q7;Q3TU20;P09470;Q5XK22;Q8K233;F6QCP8;P09470-2;Q61265;Q7TSV8;D0G895	Q3U3Q7;Q3TU20;P09470;Q5XK22;Q8K233;F6QCP8	Angiotensin-converting enzyme;Angiotensin-converting enzyme, soluble form	Ace	29.7983	29.9242	30.0495	29.1601	29.232	29.4226	27.5985	27.5106	27.345	30	30	30	29.6	29.6	29.6	150.89	0	121.09	2985000000	167	5.93737	5.60108e-05
980	Q8BND1;P0C605;P0C605-2;Q8BQ38;Q61410	Q8BND1;P0C605;P0C605-2	cGMP-dependent protein kinase;cGMP-dependent protein kinase 1	Prkg1	30.9262	30.8395	31.0415	29.3974	29.4147	29.7074	31.125	31.065	31.2113	29	29	28	46.6	46.6	45.5	76.35	0	137.45	7536600000	138	5.15761	0.000152298
981	Q8K170;Q811N6;Q80SW4;Q61877;Q80SV3;Q811M8;P10404;Q61876;Q811N1;G4V4Z0;Q61533;Q61920;Q811N3;Q61919;Q60589;Q2HJ08;Q1KYM0;Q04586;P70356;A0A068EVR8;P11370;B6DYU5;Q9R0Y9;Q64262;Q811N2	Q8K170;Q811N6;Q80SW4;Q61877;Q80SV3;Q811M8;P10404;Q61876;Q811N1;G4V4Z0;Q61533;Q61920;Q811N3;Q61919;Q60589;Q2HJ08;Q1KYM0;Q04586;P70356;A0A068EVR8;P11370	MLV-related proviral Env polyprotein;Surface protein;Transmembrane protein;Retrovirus-related Env polyprotein from Fv-4 locus	EG622147;env;Mela;Fv4	26.2955	25.9999	26.5444	28.3471	27.0357	27.4429	27.7095	27.5013	27.3836	5	5	0	21.8	21.8	0	35.496	0	16.707	587970000	28	1.81354	0.0351126
982	Q3TVS6;P10605;Q3TC17;Q6LAF6	Q3TVS6;P10605;Q3TC17;Q6LAF6	Cathepsin B;Cathepsin B light chain;Cathepsin B heavy chain	Ctsb	30.2111	30.3147	30.7793	31.0255	31.0722	31.1753	29.754	29.8378	29.9463	14	14	14	46.3	46.3	46.3	37.319	0	323.31	11392000000	232	3.22658	0.00304232
983	Q52KC1;P10630;P10630-2;Q8BTU6;E9Q561;D6RJ60;D6RJ11	Q52KC1;P10630;P10630-2;Q8BTU6;E9Q561	Eukaryotic initiation factor 4A-II;Eukaryotic initiation factor 4A-II, N-terminally processed	Eif4a2	31.8605	31.8777	31.8672	31.3081	31.5912	31.3896	30.9828	30.9076	30.9457	29	14	14	73	43.2	43.2	46.402	0	323.31	15616000000	282	4.39298	0.000472095
984	Q547J4;P10637-5;B1AQW2	Q547J4;P10637-5;B1AQW2	Microtubule-associated protein;Microtubule-associated protein tau	Mapt	27.8101	27.9772	28.5768	27.9914	28.1137	28.0288	28.8054	29.7243	29.2809	20	1	0	64.2	6.5	0	38.96	0	145.85	1915600000	37	2.02844	0.0241189
985	P10649;A2AE89;F6WHQ7;A2AE91;D3YVP8;Q7M0F3	P10649;A2AE89;F6WHQ7	Glutathione S-transferase Mu 1	Gstm1	34.9722	34.529	34.746	33.4937	33.6252	33.8307	34.953	35.0616	35.2823	24	24	12	84.4	84.4	39.9	25.97	0	323.31	118560000000	1048	3.7038	0.00139819
986	Q3UWX7;Q3UPE0;P10711;E9PYD5;P10711-2;Q9JMB4	Q3UWX7;Q3UPE0;P10711;E9PYD5;P10711-2	Transcription elongation factor A protein 1	Tcea1	30.0445	29.4671	29.4792	29.5297	29.6134	29.6857	27.9812	27.7975	27.6299	18	18	16	61.1	61.1	57.5	33.88	0	103.06	3896000000	130	4.14457	0.000691088
987	Q3U1N3;P10833	Q3U1N3;P10833	Ras-related protein R-Ras	Rras	27.2446	27.0927	27.3733	27.217	27.5297	27.0742	28.3937	28.4451	28.2273	11	9	9	52.8	40.4	40.4	23.764	0	36.254	1606400000	76	3.522	0.00186341
988	P10852-2	P10852-2	4F2 cell-surface antigen heavy chain	Slc3a2	33.4437	33.4496	33.2338	33.6613	33.5701	33.5697	33.7075	33.5795	33.6764	28	27	1	52	51	3	62.239	0	323.31	67891000000	793	1.78393	0.0370086
989	Q8C1Y3;Q3U4Y0;P10922	Q8C1Y3;Q3U4Y0;P10922	Histone H1.0;Histone H1.0, N-terminally processed	H1f0	34.127	34.584	34.1244	34.7972	34.8935	34.7882	32.9445	32.9746	32.7104	9	9	9	33	33	33	19.253	0	146.91	127150000000	769	4.5617	0.000355622
990	P11087;P11087-2;Q99LL6;Q61022;Q60785	P11087;P11087-2;Q99LL6	Collagen alpha-1(I) chain	Col1a1	28.0845	28.1402	27.5482	25.4419	26.2161	25.5369	27.0456	28.5458	27.9375	10	10	10	8.9	8.9	8.9	138.03	0	44.361	1130000000	37	2.42374	0.0121248
991	Q3UHL6;Q3UGY5;P11276;B7ZNJ1;Q3UH17;B9EHT6;Q3UHR1;Q3TBB4;Q3TCF1;Q3TCL7;Q3UZF9;Q8R3F3;Q4KL80;Q9Z1Z8	Q3UHL6;Q3UGY5;P11276;B7ZNJ1;Q3UH17;B9EHT6;Q3UHR1;Q3TBB4;Q3TCF1;Q3TCL7	Fibronectin;Anastellin	Fn1	28.3815	28.2899	28.501	27.4954	27.3833	26.4742	28.2502	27.9009	28.5031	30	30	30	18	18	18	260.13	0	75.797	1472500000	92	1.94139	0.0281544
992	P11352	P11352	Glutathione peroxidase 1	Gpx1	29.4493	29.7796	29.731	29.2703	29.2357	29.2611	29.6077	29.6497	29.5971	9	9	9	56.2	56.2	56.2	22.329	0	78.75	3433600000	124	2.20153	0.0177555
993	Q5EBJ0;P11404	Q5EBJ0;P11404	Fatty acid-binding protein, heart	Fabp3	30.8316	30.5592	30.4624	29.2029	29.7875	29.9303	30.656	30.4944	30.379	9	9	9	64.7	64.7	64.7	14.819	0	42.446	6377400000	181	2.15098	0.0194767
994	P11531;Q5U476;Q9R0A2;Q3UF47	P11531	Dystrophin	Dmd	29.8484	29.8289	29.889	30.0483	30.2904	30.1424	30.4518	30.2656	30.2893	37	36	20	13.3	13.1	6.9	425.83	0	222.17	7092500000	222	2.67365	0.0077967
995	P11798;Q80TN1;F8WIS9;F8WHB5;F6WHR9;P11798-2;D3Z7K9	P11798;Q80TN1;F8WIS9	Calcium/calmodulin-dependent protein kinase type II subunit alpha	Camk2a	31.2681	31.2026	30.6502	30.2569	30.0714	30.3102	32.5735	32.4404	32.4157	27	20	18	54.2	38.3	36.4	54.114	0	226.33	19962000000	280	4.40936	0.000459541
996	Q8VCN0;Q3UTR7;P11859	Q8VCN0;Q3UTR7;P11859	Angiotensinogen;Angiotensin-1;Angiotensin-2;Angiotensin-3;Angiotensin-4;Angiotensin 1-9;Angiotensin 1-7;Angiotensin 1-5;Angiotensin 1-4	Agt	23.75	24.2891	23.5784	23.9946	24.8112	24.0871	22.5584	22.8911	23.1654	2	2	2	4.6	4.6	4.6	51.985	0.00085543	3.3161	43121000	3	2.02738	0.0241687
997	P11881-6	P11881-6			36.71	36.6212	36.6522	35.4578	35.4626	35.3275	37.2875	37.2049	37.2572	174	174	0	59.3	59.3	0	309.34	0	323.31	580830000000	6858	7.31113	1.45351e-05
998	P12382;Q8CD98	P12382;Q8CD98	ATP-dependent 6-phosphofructokinase, liver type	Pfkl	31.9434	31.7933	31.9043	32.0379	31.8403	31.6779	32.307	32.2927	32.2786	32	26	25	48.5	40.4	39.6	85.359	0	258.81	17594000000	432	2.26953	0.0156828
999	P12658;Q8CEF3;Q8C5H2	P12658;Q8CEF3;Q8C5H2	Calbindin	Calb1	33.9399	33.8709	33.6213	32.1251	32.2649	32.0234	34.1836	33.7157	33.855	24	23	23	74.3	70.1	70.1	29.994	0	323.31	80919000000	842	4.46347	0.000422456
1000	P12787	P12787	Cytochrome c oxidase subunit 5A, mitochondrial	Cox5a	33.69	34.0001	33.9715	34.0222	34.3835	34.3331	33.7054	33.8275	33.7839	12	12	12	63	63	63	16.101	0	323.31	84349000000	858	1.65622	0.0463323
1001	P12815;Q8C5M4;P12815-2;Q3UGE5	P12815;Q8C5M4;P12815-2;Q3UGE5	Programmed cell death protein 6	Pdcd6	30.3329	30.2279	30.5702	30.7958	30.9182	31.125	30.5722	30.5808	30.6451	13	13	13	80.1	80.1	80.1	21.867	0	135.52	7211100000	190	2.12659	0.0203449
1002	P12849;Q921L9;Q3TY04;D3Z0V6;D3Z068;D3YTM5;G1C1P2;D3Z4A5;D3Z406;G1C1N8;D3Z7E4;I2E5V9;I2E5V8	P12849;Q921L9;Q3TY04;D3Z0V6	cAMP-dependent protein kinase type I-beta regulatory subunit	Prkar1b	28.4236	28.5312	28.4914	29.0825	29.2579	28.989	28.0047	27.7496	27.765	15	10	10	40.4	31.2	31.2	43.224	0	78.037	2125100000	67	4.4214	0.0004494
1003	P12960	P12960	Contactin-1	Cntn1	34.2088	34.1541	34.0824	33.7796	34.1653	34.117	34.5049	34.4954	34.7268	60	60	60	66.7	66.7	66.7	113.39	0	323.31	126890000000	1661	2.06567	0.0225365
1004	Q6P1A9;Q5EBG5;Q58ET1;Q80UT7;P12970;F6VBB8;Q8CDE3;V9GX35;F6SSI5	Q6P1A9;Q5EBG5;Q58ET1;Q80UT7;P12970;F6VBB8	60S ribosomal protein L7a	Rpl7a;Gm4978	32.5259	32.6565	32.4953	32.6524	32.7445	32.4837	32.026	31.5761	31.6787	20	20	20	50	50	50	30.024	0	275.46	29016000000	370	2.95561	0.00481759
1005	Q6PAC1;P13020-2;Q3UCW8;Q3TGJ9;P13020;Q3U9Q8;CON__Q3SX14;A6PWS5	Q6PAC1;P13020-2;Q3UCW8;Q3TGJ9;P13020;Q3U9Q8	Gelsolin	Gsn	29.5642	29.7486	29.8367	30.7123	30.7845	30.5687	28.5158	28.7976	28.7889	31	31	31	51	51	51	80.762	0	218.34	6439400000	178	5.17098	0.000148675
1006	Q544K9;P13439;Q3TVV7;D6RJ62	Q544K9;P13439;Q3TVV7	Uridine 5-monophosphate synthase;Orotate phosphoribosyltransferase;Orotidine 5-phosphate decarboxylase	Umps	28.1855	27.9513	27.9709	27.6743	27.7172	27.5233	26.6959	26.804	26.6369	16	16	16	54.5	54.5	54.5	52.292	0	43.707	954440000	61	4.84369	0.000229384
1007	P13595	P13595	Neural cell adhesion molecule 1	Ncam1	34.524	34.5479	34.5145	34.1715	34.2127	34.1962	34.8877	35.0241	35.0559	45	45	8	51.7	51.7	12.8	119.43	0	323.31	161750000000	1801	5.24435	0.00013512
1008	Q3UHZ3;Q7TSJ0;P13864;J3QNW0;P13864-2;Q3UPE8;Q0VDW2;Q3UWN4	Q3UHZ3;Q7TSJ0;P13864;J3QNW0;P13864-2	DNA (cytosine-5)-methyltransferase;DNA (cytosine-5)-methyltransferase 1	Dnmt1	27.7451	28.1155	27.749	28.2779	28.5947	28.4234	25.3876	24.8329	24.1161	31	31	31	24.3	24.3	24.3	183.31	0	95.934	1041000000	79	4.21178	0.000609049
1009	Q545P0;Q3TSQ1;P14094;Q3TV47;Q3TRA6;B0LAB6	Q545P0;Q3TSQ1;P14094;Q3TV47	Sodium/potassium-transporting ATPase subunit beta-1	Atp1b1	36.0527	35.9269	35.8534	35.9938	36.0696	36.1203	35.7396	35.5652	35.44	25	25	25	62.8	62.8	62.8	35.194	0	323.31	317750000000	1544	2.35439	0.0135832
1010	P14115	P14115	60S ribosomal protein L27a	Rpl27a	31.5966	31.6793	32.0214	31.4166	31.5442	31.3228	30.3264	30.8792	30.7257	7	7	7	35.1	35.1	35.1	16.605	0	89.663	12654000000	158	2.6892	0.00759923
1011	Q5M9N8;Q3UBI6;P14148;Q3TK73;F6XI62	Q5M9N8;Q3UBI6;P14148;Q3TK73;F6XI62	60S ribosomal protein L7	Rpl7	32.4487	32.6827	32.2931	32.0603	32.5596	32.5584	31.9038	31.7786	31.353	28	27	27	62.6	62.6	62.6	31.419	0	213.77	23550000000	376	1.7432	0.039639
1012	P14152;B1ATQ3	P14152	Malate dehydrogenase, cytoplasmic	Mdh1	35.7509	35.8524	35.7261	35.1829	35.3321	35.2509	35.1534	35.1172	35.2565	19	19	19	48.2	48.2	48.2	36.511	0	323.31	227100000000	1867	4.02148	0.000837378
1013	P14733;Q8C553	P14733;Q8C553	Lamin-B1	Lmnb1	34.104	33.8928	33.8337	34.6252	34.5988	34.8745	32.1613	32.1477	32.1579	62	62	53	75	75	67	66.785	0	323.31	110460000000	1177	6.22661	4.36492e-05
1014	Q5M8R8;P14869;Q5FWB6;E9Q070;D3YVM5;S4R1N1;O89073	Q5M8R8;P14869;Q5FWB6;E9Q070;D3YVM5;S4R1N1	60S acidic ribosomal protein P0	Rplp0;Gm8730	32.4977	32.2686	32.2672	32.3614	32.6314	32.5032	31.3253	31.5688	31.3098	20	20	20	59.3	59.3	59.3	34.216	0	215.76	27002000000	418	3.87656	0.00105815
1015	Q52L49;P15066	Q52L49;P15066	Transcription factor jun-D	Jund	25.7184	26.681	27.1825	26.4576	27.2658	25.7128	24.473	24.4271	24.017	2	2	2	11	11	11	31.72	0	11.838	304450000	14	2.08623	0.0217914
1016	P15105;D3YVK1;D3Z121	P15105	Glutamine synthetase	Glul	34.9399	35.0546	34.8389	35.3414	35.346	35.6531	34.2163	34.4258	34.4648	28	28	11	69.4	69.4	42.6	42.119	0	323.31	194270000000	1728	3.54629	0.00179957
1017	P15327;Q3TAQ8;D3Z223;D3YUE8;D3YYH3	P15327;Q3TAQ8;D3Z223	Bisphosphoglycerate mutase;Phosphoglycerate mutase	Bpgm	28.4061	28.6691	28.5254	28.5609	28.5461	28.4912	29.2458	29.0077	29.1991	10	10	10	37.1	37.1	37.1	29.978	0	73.742	1880200000	70	3.24002	0.00296586
1018	Q5SZA3;P15864;Q3UXH2	Q5SZA3;P15864	Histone H1.2	Hist1h1c	31.0755	31.3357	30.9078	31.8893	31.9512	31.9033	29.5137	29.7467	29.527	16	3	2	37.7	12.7	9.4	21.266	0	6.073	15985000000	97	5.44415	9.97498e-05
1019	P16045	P16045	Galectin-1	Lgals1	30.0942	30.0976	30.0331	29.6524	29.762	29.7964	29.3852	29.3309	29.43	6	6	6	57	57	57	14.866	0	41.565	3322800000	84	4.77928	0.000254246
1020	P16054;Q8C944;Q3U1I0;D3YWQ8;Q3UKY1;P23298	P16054	Protein kinase C epsilon type	Prkce	29.7205	29.6168	29.5481	29.1643	29.2905	29.175	30.0243	29.8486	29.781	28	28	28	37.6	37.6	37.6	83.56	0	91.873	5254000000	191	3.37531	0.00239868
1021	P16305-3;P16305;P16305-4;P16305-2;O54736;Q3TRC7;Q543Z0;Q3USX9;Q9D6F4	P16305-3;P16305;P16305-4;P16305-2;O54736	Gamma-aminobutyric acid receptor subunit alpha-6	Gabra6	31.2066	31.293	31.3717	32.6037	32.4451	32.5518	29.3596	29.5102	29.2221	15	15	15	38.9	38.9	38.9	50.99	0	262.09	15963000000	259	7.05771	1.73683e-05
1022	Q3TYV5;P16330;Q3TYL9;P16330-2	Q3TYV5;P16330;Q3TYL9;P16330-2	2,3-cyclic-nucleotide 3-phosphodiesterase	Cnp	35.4462	35.3571	35.3099	36.5326	36.6658	36.7694	33.8057	33.6662	33.6488	42	42	31	79.5	79.5	65	47.123	0	323.31	405340000000	2458	7.19644	1.48721e-05
1023	P16388;Q8CA58;Q3TZ64;Q2KHP0;P16390;B2RXZ4;B2RQA1;Q61423;P59053-2;P59053	P16388;Q8CA58;Q3TZ64;Q2KHP0	Potassium voltage-gated channel subfamily A member 1	Kcna1	29.6539	29.7804	30.066	30.5221	30.3806	30.2876	30.5817	30.3456	30.4143	17	17	9	42	42	25.7	56.409	0	143.45	8702100000	177	2.28008	0.0153817
1024	Q52JJ6;P16406;Q8CD51;F7B9G4;Q6P3C1;F6YHW2	Q52JJ6;P16406;Q8CD51	Glutamyl aminopeptidase	Enpep	26.6345	26.3501	26.7201	27.118	26.9852	26.93	27.5316	27.0323	27.105	19	19	19	25.4	25.4	25.4	107.96	0	41.418	809300000	53	1.73913	0.0399583
1025	Q3UJ34;Q3UEJ7;P16460;J3QNG0	Q3UJ34;Q3UEJ7;P16460;J3QNG0	Argininosuccinate synthase	Ass1;Gm5424	28.0329	28.1706	27.6418	28.6861	29.2259	28.846	27.0743	27.3566	26.667	18	18	18	47.1	47.1	47.1	46.584	0	41.767	1825100000	79	3.10108	0.00376674
1026	Q566K0;P17095;Q3TE85	Q566K0;P17095;Q3TE85	High mobility group protein HMG-I/HMG-Y	Hmga1	30.9432	30.9375	31.5237	31.4316	31.8316	31.5828	29.9501	29.8554	30.0861	7	7	4	54.2	54.2	23.4	11.614	0	221.25	9352900000	138	3.42976	0.00219818
1027	Q5FW97;P17182;Q6PHC1;Q8CF78;B1ARR7;B1ARR6	Q5FW97;P17182;Q6PHC1	Alpha-enolase	EG433182;Eno1	35.9628	36.0026	36.0717	35.646	35.5673	35.805	36.0148	36.1608	36.2686	49	49	26	91.7	91.7	48.6	47.14	0	323.31	405380000000	4308	2.39866	0.0126528
1028	P17426-2;P17426;F6TPX8;F6VSP9	P17426-2;P17426	AP-2 complex subunit alpha-1	Ap2a1	34.7698	34.8626	34.6747	34.72	34.6689	34.6463	34.96	35.0299	34.9057	56	56	43	64.1	64.1	50.7	105.48	0	323.31	147400000000	1781	2.23574	0.0166622
1029	Q69ZW4;P17427;Q6PEE6;E9PWD0	Q69ZW4;P17427;Q6PEE6	AP-2 complex subunit alpha-2	Ap2a2	34.4127	34.4124	34.1331	33.6542	33.7677	33.638	34.6176	34.6213	34.5487	52	39	1	64.1	50.9	0.7	107.34	0	323.31	101450000000	1307	3.96237	0.000919901
1030	P17439	P17439	Glucosylceramidase	Gba	26.8556	26.7191	26.2668	27.3882	27.4175	27.1638	26.7694	26.6941	26.8972	12	12	12	33.6	33.6	33.6	57.621	0	19.997	785920000	34	1.89682	0.0304643
1031	P17563;Q63836;G3UYY2;D6RHN2;G3UWK0;G3UZT2	P17563;Q63836;G3UYY2	Selenium-binding protein 1;Selenium-binding protein 2	Selenbp1;Selenbp2	29.695	29.7831	29.9858	28.9139	29.1533	28.7952	30.2859	30.06	30.1478	23	23	23	59.3	59.3	59.3	52.513	0	194.37	5210100000	196	3.76925	0.00125829
1032	Q5SVY2;Q3UAJ1;P17742;Q3TE63;Q9CZK9;F8VPN3;V9GXC1;V9GX31	Q5SVY2;Q3UAJ1;P17742;Q3TE63;Q9CZK9	Peptidyl-prolyl cis-trans isomerase;Peptidyl-prolyl cis-trans isomerase A;Peptidyl-prolyl cis-trans isomerase A, N-terminally processed	Ppia	35.0091	34.7634	34.9382	34.3974	34.2198	34.5125	34.7198	34.7221	34.7866	16	15	15	89.6	86	86	17.971	0	323.31	196480000000	1777	2.45587	0.0114515
1033	Q91ZH2;Q542J9;P17918;Q9CZD6	Q91ZH2;Q542J9;P17918;Q9CZD6	Proliferating cell nuclear antigen	Pcna	26.0092	25.7078	25.986	24.954	24.8993	24.1825	23.6437	24.1004	23.5892	4	4	4	17.6	17.6	17.6	28.845	0	7.7218	167230000	15	3.30683	0.00266465
1034	Q3UCD9;Q3U7P0;Q3U651;Q3TWR6;Q3TWD0;Q8C243;P18242;Q3U8W5;Q3TJN3;F6Y6L6;Q3TWL1;Q3U7I9;Q3UC89;Q3UAQ1;Q3TXL5;Q3UCW4;Q3TIR0;Q8VCK2;F8WIR1;Q05BF3	Q3UCD9;Q3U7P0;Q3U651;Q3TWR6;Q3TWD0;Q8C243;P18242;Q3U8W5;Q3TJN3;F6Y6L6;Q3TWL1;Q3U7I9;Q3UC89;Q3UAQ1;Q3TXL5;Q3UCW4;Q3TIR0;Q8VCK2	Cathepsin D	Ctsd	31.637	31.4908	31.3676	32.116	32.0061	31.9092	30.7889	30.9328	30.9605	15	15	15	37.3	37.3	37.3	44.953	0	113.32	17363000000	217	4.24775	0.000576353
1035	Q544Y7;P18760;F8WGL3;Q9CX22	Q544Y7;P18760;F8WGL3;Q9CX22	Cofilin-1	Cfl1	34.2691	34.2208	34.419	33.8441	33.8143	34.1077	34.3821	34.4655	34.6345	25	25	21	91	91	77.7	18.559	0	323.31	124400000000	1165	2.28423	0.0152836
1036	Q543S2;P18872;D3Z2M7;F7BLT7;F6WC15;F6W1B2;S4R196	Q543S2;P18872;D3Z2M7	Guanine nucleotide-binding protein G(o) subunit alpha	Gnao1	34.4699	34.6873	34.4946	34.1177	34.2695	34.3574	35.0751	35.1728	35.2581	22	20	5	69.8	66.4	23.7	40.084	0	323.31	196640000000	1866	3.8167	0.00115951
1037	P18872-2	P18872-2	Guanine nucleotide-binding protein G(o) subunit alpha	Gnao1	27.9715	23.2598	23.1568	30.0006	30.3258	30.3579	29.2284	29.075	29.184	21	3	3	65.5	16.9	16.9	40.036	0	255.87	4324100000	40	1.89	0.0307542
1038	P19096;Q3UHT6;Q3TB22;O89060;E9PVP1	P19096;Q3UHT6;Q3TB22	Fatty acid synthase;[Acyl-carrier-protein] S-acetyltransferase;[Acyl-carrier-protein] S-malonyltransferase;3-oxoacyl-[acyl-carrier-protein] synthase;3-oxoacyl-[acyl-carrier-protein] reductase;3-hydroxyacyl-[acyl-carrier-protein] dehydratase;Enoyl-[acyl-carrier-protein] reductase;Oleoyl-[acyl-carrier-protein] hydrolase	Fasn	33.2308	33.2541	33.1873	33.2478	33.2552	33.3258	33.4323	33.5346	33.4951	117	117	117	61.9	61.9	61.9	272.43	0	323.31	62642000000	1439	3.15902	0.00342563
1039	P19246;Q80TQ3	P19246;Q80TQ3	Neurofilament heavy polypeptide	Nefh	32.5687	32.6747	32.5621	34.323	34.4282	34.5196	31.1588	30.9206	30.9065	45	42	40	40.4	38.5	37.7	116.99	0	323.31	76257000000	746	7.25678	1.51004e-05
1040	Q5M9M0;P19253;E9Q5A0;Q3TDS9;S4R281	Q5M9M0;P19253;E9Q5A0;Q3TDS9;S4R281	60S ribosomal protein L13a	Rpl13a	30.8181	30.5339	30.6391	30.5381	30.7781	30.7015	30.058	30.0525	29.8634	12	12	11	45.8	45.8	42.9	23.464	0	97.527	9953700000	278	3.0703	0.00397123
1041	Q8BV87;Q3TWG9;Q3TMD2;Q3TJK3;P19324;Q8BVU9	Q8BV87;Q3TWG9;Q3TMD2;Q3TJK3;P19324;Q8BVU9	Serpin H1	Serpinh1	28.4533	28.4	28.1769	27.7143	27.7713	27.705	28.3834	28.5005	28.0937	14	14	14	43.4	43.4	43.4	46.519	0	60.768	1615500000	68	2.4359	0.0118776
1042	Q3UIA1;P19426-2;P19426;G3UY39	Q3UIA1;P19426-2;P19426;G3UY39	Negative elongation factor E	Nelfe	25.059	24.6439	24.8198	24.6566	25.3848	24.904	23.2102	23.2013	22.9466	6	6	6	24.5	24.5	24.5	41.483	0	9.453	111080000	10	3.68374	0.00143637
1043	Q9D881;P19536	Q9D881;P19536	Cytochrome c oxidase subunit 5B, mitochondrial	Cox5b	32.0777	31.9414	32.132	32.2106	32.4222	32.2514	31.8494	31.831	32.0237	8	8	8	51.2	51.2	51.2	13.847	0	199.65	30582000000	430	1.96702	0.026843
1044	Q3U9G2;P20029;Q3TWF2;Q3TKF8;Q3TI47;Q9DC41;Q3U7T8;Q3U6V3;Q3UEM8;Q3TUS2	Q3U9G2;P20029;Q3TWF2;Q3TKF8;Q3TI47;Q9DC41;Q3U7T8;Q3U6V3;Q3UEM8	78 kDa glucose-regulated protein	Hspa5	34.2429	34.1782	34.1773	34.0443	34.1837	34.0421	34.0065	33.9258	33.9899	40	38	38	55.1	53.4	53.4	72.405	0	323.31	104460000000	1376	2.06598	0.0225293
1045	Q3TXR9;P20060	Q3TXR9;P20060	Beta-hexosaminidase;Beta-hexosaminidase subunit beta	Hexb	27.9791	28.2795	28.1423	28.3031	28.8354	28.7056	27.9099	27.9077	27.7281	19	19	19	41.4	41.4	41.4	61.115	0	47.516	1767200000	79	2.11492	0.0207348
1046	Q5FWJ3;P20152;Q3V2S4;Q3U6S1;Q3TWV0;Q3UAX1;Q3UD36;A4IF59;A2AKJ2	Q5FWJ3;P20152;Q3V2S4;Q3U6S1;Q3TWV0;Q3UAX1;Q3UD36;A4IF59	Vimentin	Vim	33.9683	33.9602	33.9352	32.7669	32.7564	32.6519	34.4785	34.3987	34.3962	53	52	1	87.8	85.8	4.1	53.687	0	323.31	95524000000	1209	7.65004	1.04666e-05
1047	P20357;Q3URJ7;G3UZK9;G3UZE9;Q80X35;Q80ZL4;B2KGT5;Q3TRF8;F7ALC8;E9Q8Y2;G3UXY3	P20357;Q3URJ7	Microtubule-associated protein 2	Map2	32.3712	32.3451	32.363	32.1887	32.5298	32.3738	30.8622	30.9596	31.0286	80	80	51	57.7	57.7	40.6	199.13	0	323.31	24046000000	524	5.24167	0.000134977
1048	P20917;Q3ZB61;Q3ZB60;Q6LBU4	P20917;Q3ZB61;Q3ZB60	Myelin-associated glycoprotein	Mag	31.9516	32.0185	32.0515	33.605	33.9118	33.9895	28.2371	27.9816	28.4835	19	19	3	34.2	34.2	7.2	69.259	0	323.31	40614000000	395	7.08487	1.68249e-05
1049	Q3ZB62;Q3T1F6;P20917-2	Q3ZB62;Q3T1F6;P20917-2	Myelin-associated glycoprotein	Mag	26.4179	26.102	26.3941	27.6719	27.5171	27.7518	24.2568	24.8607	23.8468	17	1	1	30.9	1.9	1.9	64.296	0	42.582	750860000	8	4.36478	0.000490647
1050	Q3UHH5;P21279;REV__E9Q535;REV__Q60611;REV__E9PVB7;A2AUC9	Q3UHH5;P21279	Guanine nucleotide-binding protein G(q) subunit alpha	Gnaq	33.1372	33.2087	33.33	32.7533	32.7244	32.5859	33.7153	33.6971	33.8164	24	23	15	64.9	62.7	41.8	42.158	0	323.31	66206000000	645	4.792	0.000249236
1051	Q3U5K7;Q9EPX9;P21460;A2APX3	Q3U5K7;Q9EPX9;P21460;A2APX3	Cystatin-C	Cst3	26.804	26.4104	26.2713	27.0695	27.1257	27.1484	26.3085	26.3671	26.5388	5	5	5	43.1	43.1	43.1	15.217	0	18.812	790000000	26	2.30119	0.0148179
1052	P21619;Q3V159;P21619-2	P21619;Q3V159;P21619-2	Lamin-B2	Lmnb2	32.4694	32.4685	32.5222	33.2919	33.3288	33.4008	30.7293	30.7793	30.8818	49	40	40	70	62.1	62.1	67.317	0	323.31	40609000000	515	8.09929	5.78693e-06
1053	P21981;G3UXE8;Q14B91;Q14B90;Q9D7I9	P21981	Protein-glutamine gamma-glutamyltransferase 2	Tgm2	28.4497	28.6741	28.7998	27.5262	27.3338	27.9123	28.4816	28.6513	28.5917	20	20	20	34.8	34.8	34.8	77.06	0	56.694	1773100000	96	2.90009	0.00524796
1054	Q3UFK0;Q3TSZ8;Q3TI59;P21995	Q3UFK0;Q3TSZ8;Q3TI59;P21995	Embigin	Emb	28.0084	27.544	28.3019	27.4127	26.8022	27.0267	27.8838	27.9607	28.0618	4	4	4	13.3	13.3	13.3	37.03	0	40.377	1201500000	42	1.83933	0.0336043
1055	Q4QRK2;Q8C3V7;Q544X6;P22315;Q3UC49;Q91W09	Q4QRK2;Q8C3V7;Q544X6;P22315;Q3UC49;Q91W09	Ferrochelatase;Ferrochelatase, mitochondrial	Fech	30.8455	30.6735	30.5697	31.0398	31.2242	30.9861	30.6202	30.6315	30.5277	21	21	21	58.9	58.9	58.9	44.755	0	183.67	10193000000	260	2.38578	0.0129088
1056	Q3TJN9;Q543T1;Q3UZ23;P22437;Q3UMR6;Q05769	Q3TJN9;Q543T1;Q3UZ23;P22437	Prostaglandin G/H synthase 1	Ptgs1	24.2567	23.2476	23.287	26.2236	25.733	25.546	21.7395	22.864	22.4781	7	7	7	13.9	13.9	13.9	55.98	0	6.3743	154530000	18	3.34092	0.00251752
1057	Q8CBB7;Q3UKX8;P22892;Q8CC03;Q8BSZ7;Q3UHW6;Q3U9D1;O88512	Q8CBB7;Q3UKX8;P22892;Q8CC03	AP-1 complex subunit gamma-1	Ap1g1	31.0629	30.8064	30.8723	30.6136	30.6132	30.2863	31.3489	31.1405	30.9695	34	34	34	50.2	50.2	50.2	91.721	0	199.02	10900000000	382	1.98984	0.0257629
1058	Q8VBV6;Q14AH9;P22933	Q8VBV6;Q14AH9;P22933	Gamma-aminobutyric acid receptor subunit delta	Gabrd	29.1514	29.2161	29.1297	30.453	30.849	30.7364	26.6869	27.2087	27.2854	12	12	12	26.5	26.5	26.5	50.578	0	164.52	5671500000	119	5.48186	9.67868e-05
1059	P23116;Q3UL99;Q6A0B9;Q3TKF9;Q3UEK3;Q3UM46;Q3TRH1	P23116;Q3UL99;Q6A0B9;Q3TKF9;Q3UEK3;Q3UM46	Eukaryotic translation initiation factor 3 subunit A	Eif3a	31.5116	31.3543	31.3436	31.653	31.4263	31.4203	31.1087	31.0911	31.2247	55	55	55	42.1	42.1	42.1	161.93	0	323.31	14936000000	473	1.88573	0.0309905
1060	P23242;Q7TMQ1;Q8C4N2;Q9CT20;Q6T9D4	P23242;Q7TMQ1	Gap junction alpha-1 protein;Gap junction protein	Gja1	31.9267	31.8471	32.0982	32.181	32.5916	32.4637	31.0849	31.2655	31.1403	22	22	22	52.1	52.1	52.1	43.004	0	323.31	28342000000	398	3.78859	0.0012117
1061	P23475;E9Q0B8;E9PZD4	P23475	X-ray repair cross-complementing protein 6	Xrcc6	24.9891	25.1804	24.9747	25.5913	25.8936	24.9589	24.7352	24.2613	24.0562	9	9	8	16.3	16.3	15.3	69.483	0	11.666	234170000	20	1.70302	0.0426098
1062	P23819-4;E9QKC0;P23819	P23819-4;E9QKC0;P23819	Glutamate receptor 2	Gria2	31.8304	31.9827	32.0866	31.4781	31.2655	31.3916	32.591	32.7831	32.8329	48	48	0	53.6	53.6	0	102.85	0	323.31	24739000000	490	4.52928	0.000377206
1063	Q52L78;P23927;REV__F2Z3U2;REV__Q9Z180	Q52L78;P23927	Alpha-crystallin B chain	Cryab	29.106	29.3209	29.5982	30.4655	30.8538	30.3965	26.2442	25.9099	25.4476	13	13	13	69.7	69.7	69.7	20.069	0	173.35	5302400000	128	5.42702	0.000102461
1064	Q9DCY1;P24369;Q6ZQM2	Q9DCY1;P24369	Peptidyl-prolyl cis-trans isomerase;Peptidyl-prolyl cis-trans isomerase B	Ppib	31.2838	31.1472	31.1194	31.6622	31.8493	31.5806	31.4142	31.3229	31.1878	15	15	15	60.6	60.6	60.6	23.713	0	269.17	19254000000	378	2.4244	0.0121123
1065	P24527	P24527	Leukotriene A-4 hydrolase	Lta4h	31.8651	31.9693	32.0498	31.4889	31.3829	31.4176	31.6455	31.5708	31.4957	30	30	29	56.3	56.3	55.3	69.05	0	323.31	17825000000	398	3.46632	0.00205038
1066	P24788;A2A9P6;P24788-2;Q8R190;Q3V2W3;Q64036;Q3UXP3;Q9CVG6;Q05AA8;Q64434	P24788;A2A9P6;P24788-2;Q8R190	Cyclin-dependent kinase 11B	Cdk11b	27.9763	28.2942	28.0953	28.3404	28.0842	28.3452	26.7801	26.661	25.9475	18	18	18	23.9	23.9	23.9	91.512	0	28.477	1220700000	71	3.33549	0.00254278
1067	Q58EU3;Q3TXS9;P25444;Q3TXR5;D3YVC1;Q3UB36;D3YWJ3;Q3TLE5;Q3TL20;Q3TI78;J3QMG5;Q9DC49;E9Q1N8;F6YTZ4;O89072;Q3V2B9;D3Z536	Q58EU3;Q3TXS9;P25444;Q3TXR5;D3YVC1;Q3UB36;D3YWJ3;Q3TLE5;Q3TL20;Q3TI78;J3QMG5;Q9DC49;E9Q1N8;F6YTZ4;O89072	40S ribosomal protein S2	Rps2;Gm5786;Gm18025;Gm6576	32.3496	32.2362	32.6183	32.5247	32.5047	32.3159	31.5142	31.4791	31.5367	19	19	19	60.8	60.8	60.8	31.231	0	97.813	22370000000	341	3.68633	0.00143239
1068	Q3TCS3;P25911;Q05DV0;Q3TAT8;P16277	Q3TCS3;P25911;Q05DV0	Non-specific protein-tyrosine kinase;Tyrosine-protein kinase Lyn	Lyn	29.4449	29.6563	29.42	28.4906	28.7084	28.3825	30.8864	30.6592	30.5991	26	24	2	53.7	52.1	2.9	58.812	0	86.417	6044300000	187	5.20884	0.000140035
1069	P26039;Q80TM2;Q3UHS6;Q0V930;Q3TBC3;A2AIM2;Q8C9Z8;F6SX70;F6S1V7	P26039;Q80TM2;Q3UHS6	Talin-1	Tln1	31.5955	31.7208	31.6898	31.5326	31.636	31.7084	31.9773	31.9474	31.9656	101	86	86	58.4	53.4	53.4	269.82	0	323.31	18433000000	605	2.89815	0.00526135
1070	Q4KML7;Q3UXR4;Q3UL48;P26040;Q3TCP5;Q8CBU4	Q4KML7;Q3UXR4;Q3UL48;P26040;Q3TCP5;Q8CBU4	Ezrin	Ezr	30.0284	30.0444	29.9076	27.5862	27.9205	27.6877	27.8356	27.4093	27.5532	28	15	15	46.9	31.4	31.4	69.406	0	93.23	2401200000	76	5.48294	9.69795e-05
1071	P26041;Q3TZQ2;Q05DU4;Q3UF33	P26041;Q3TZQ2;Q05DU4	Moesin	Msn	32.7563	32.5881	32.5799	32.218	31.9603	31.932	33.2602	33.1421	33.089	49	49	35	66.4	66.4	48.4	67.766	0	323.31	38832000000	652	4.11289	0.00072316
1072	Q545R0;P26231;Q3TGQ3;Q6NV50	Q545R0;P26231;Q3TGQ3;Q6NV50	Catenin alpha-1	Ctnna1	30.2595	30.0137	30.3498	30.3984	30.4787	30.4308	29.7574	29.6858	29.845	42	32	31	60.3	47.7	46.5	100.11	0	226.96	6396700000	222	3.02504	0.00425863
1073	Q3U6E4;Q0VGU2;P26350;Q8C2T3;Q3U8X6;Q3UA54;Q8CAQ5;J3QPK6	Q3U6E4;Q0VGU2;P26350;Q8C2T3;Q3U8X6;Q3UA54;Q8CAQ5	Prothymosin alpha;Prothymosin alpha, N-terminally processed;Thymosin alpha	Ptma;Gm12504	29.4692	28.9638	30.209	28.8881	29.3696	29.1241	26.567	26.3418	26.5119	7	7	7	37.8	37.8	37.8	12.325	0	149.34	3066700000	98	3.83368	0.00112683
1074	Q80XR5;P26369;Q505Q1;Q922I0;Q3KQM4	Q80XR5;P26369;Q505Q1;Q922I0;Q3KQM4	Splicing factor U2AF 65 kDa subunit	U2af2	31.6161	31.5799	31.6248	32.806	32.7972	32.614	29.694	30.1646	30.022	18	18	18	54.4	54.4	54.4	53.12	0	323.31	18970000000	367	5.77336	6.85156e-05
1075	P26443;Q3TSQ7;F7CFA5;Q9D9C6	P26443;Q3TSQ7	Glutamate dehydrogenase 1, mitochondrial	Glud1	34.3543	34.3288	34.4832	34.9023	34.9436	35.017	34.5069	34.555	34.6445	37	37	37	63.3	63.3	63.3	61.336	0	323.31	178910000000	2686	3.73606	0.0013282
1076	P70304;P26450;Q80UI5;Q3UXE9;Q3TST3;Q64143;Q3TP23;B1AUG0;P70305	P70304;P26450;Q80UI5	Phosphatidylinositol 3-kinase regulatory subunit alpha	Pik3r1	27.8371	28.138	28.4875	27.7632	27.68	27.8589	28.5527	28.5115	28.4225	16	16	14	26.7	26.7	24.2	83.5	0	24.587	1415900000	72	1.91944	0.0292185
1077	P26645;Q05BL6	P26645;Q05BL6	Myristoylated alanine-rich C-kinase substrate	Marcks	32.7253	32.657	33.4115	31.9211	32.4481	32.6644	33.5814	33.7831	34.1832	14	14	14	56.6	56.6	56.6	29.661	0	323.31	55972000000	362	2.13965	0.0198744
1078	P27048	P27048	Small nuclear ribonucleoprotein-associated protein B	Snrpb	30.4848	30.2797	29.5986	30.744	30.4477	30.3245	28.3893	28.5742	27.4799	11	11	2	43.3	43.3	14.7	23.656	0	100.54	6261600000	240	2.85336	0.00568474
1079	P27546-2;P27546;P27546-3;Q78TF3	P27546-2;P27546;P27546-3	Microtubule-associated protein 4	Map4	32.2345	32.1574	32.2691	31.1005	31.573	31.5609	32.6116	32.7186	32.754	44	44	19	51.8	51.8	27.8	117.34	0	323.31	25442000000	456	3.65507	0.00150099
1080	P27600;Q2NKI3	P27600;Q2NKI3	Guanine nucleotide-binding protein subunit alpha-12	Gna12	27.2603	27.0347	27.109	26.5696	27.0688	26.855	27.5826	27.8185	27.521	12	11	11	36.7	34.6	34.6	44.095	0	13.425	812810000	40	2.33196	0.0140982
1081	P27601;Q3UE40;Q9D034;Q8C5L2	P27601;Q3UE40	Guanine nucleotide-binding protein subunit alpha-13	Gna13	31.1497	31.072	31.232	30.7286	30.7958	31.2084	31.6764	31.6286	31.5375	25	25	24	62.3	62.3	60.2	44.054	0	217.77	14063000000	312	2.30347	0.0147537
1082	Q3UB90;Q3UB67;P27659;Q3U9L3;Q3UB15;Q3T9U9;Q99N25;Q9CQ09;Q5U470;E9PWZ3	Q3UB90;Q3UB67;P27659;Q3U9L3;Q3UB15;Q3T9U9	60S ribosomal protein L3	Rpl3	32.1767	32.0418	31.7488	32.6023	32.5054	32.374	31.2847	31.3954	30.8976	25	25	25	57.6	57.6	57.6	46.079	0	165.48	25403000000	431	3.12258	0.00362422
1083	P27773;F6Q404	P27773	Protein disulfide-isomerase A3	Pdia3	33.4654	33.5264	33.3426	33.5358	33.4659	33.5358	33.1314	33.3618	33.1486	36	36	36	61.8	61.8	61.8	56.678	0	323.31	66048000000	1147	1.71738	0.041593
1084	P28028	P28028	Serine/threonine-protein kinase B-raf	Braf	29.1563	28.9361	28.8349	28.1221	28.4544	28.3804	29.2763	29.532	29.2008	23	23	2	40.2	40.2	4.1	88.779	0	44.823	2967400000	113	3.01517	0.00434748
1085	P28230	P28230	Gap junction beta-1 protein	Gjb1	23.3016	22.6142	24.2606	24.8823	24.9632	25.6995	23.6622	23.2074	23.3786	4	4	4	24	24	24	32.003	0	9.471	134990000	10	1.91971	0.0292221
1086	Q8VDC3;P28271	Q8VDC3;P28271	Aconitate hydratase;Cytoplasmic aconitate hydratase	aco1;Aco1	31.5339	31.495	31.6258	31.1228	31.439	31.424	32.0062	32.0264	31.9499	43	43	42	59.7	59.7	58.8	99.102	0	323.31	18024000000	491	3.01098	0.00437759
1087	Q544Z7;P28352;F6QA74;D3Z124;D3Z6R9	Q544Z7;P28352;F6QA74;D3Z124	DNA-(apurinic or apyrimidinic site) lyase;DNA-(apurinic or apyrimidinic site) lyase, mitochondrial	Apex1	30.5484	30.9022	31.151	31.2667	31.1181	31.054	28.7003	28.3098	28.2698	20	20	20	64	64	64	35.49	0	323.31	8783100000	169	4.898	0.000211737
1088	Q6P5I3;P28474;Q9D748;Q548K2;Q3UMM7;Q64437	Q6P5I3;P28474	S-(hydroxymethyl)glutathione dehydrogenase;Alcohol dehydrogenase class-3	Adh5	31.6261	31.7505	32.0262	31.5513	31.5689	31.5449	31.963	32.0059	31.9116	22	22	22	65.5	65.5	65.5	39.547	0	302.58	19911000000	337	1.74616	0.0393959
1089	P28571-1;P28571-2;P28571;E9Q517;E9Q3V0;E9QA02;E9Q3Z2;E9PWC4	P28571-1;P28571-2;P28571;E9Q517;E9Q3V0	Sodium- and chloride-dependent glycine transporter 1;Transporter	Slc6a9	30.385	30.5935	30.4933	30.6793	30.7359	30.5705	30.3195	30.3589	30.3578	9	8	8	16.1	15	15	70.557	0	127.42	9236100000	168	2.11809	0.0206182
1090	Q3UBP0;P28650;J3QN31;P28650-2	Q3UBP0;P28650;J3QN31;P28650-2	Adenylosuccinate synthetase isozyme 1	Adssl1	29.8468	29.9694	30.3509	30.8211	31.4511	31.1651	28.0743	27.9201	28.4223	27	27	24	62.4	62.4	59.3	50.254	0	129.87	7121300000	186	4.45761	0.000426592
1091	P28651	P28651	Carbonic anhydrase-related protein	Ca8	34.0629	34.2875	34.5196	32.7766	32.9195	32.8951	34.5625	34.6837	34.8851	12	12	12	46	46	46	33.081	0	323.31	118180000000	1060	4.60378	0.000331307
1092	Q7TMW3;Q3TNY9;P28653;Q3UXK8;Q3TAF9;Q6PG76	Q7TMW3;Q3TNY9;P28653;Q3UXK8;Q3TAF9	Biglycan	Bgn	24.9486	25.0171	24.7542	23.7133	23.7215	24.5123	25.4084	26.3565	25.9223	6	6	6	17.3	17.3	17.3	41.609	0	6.6584	194980000	12	2.54344	0.00980614
1093	Q3UKR1;Q3TSV1;P28654;Q6LAK9	Q3UKR1;Q3TSV1;P28654;Q6LAK9	Decorin	Dcn	25.3773	25.3565	25.4002	24.2751	24.0412	22.9287	25.4506	24.9713	25.0323	4	4	4	13.8	13.8	13.8	39.809	0	25.122	131480000	10	2.09411	0.0214868
1094	Q3TKP3;P28658;Q3TCF4;Q8BWX1	Q3TKP3;P28658;Q3TCF4;Q8BWX1	Ataxin-10	Atxn10	29.9896	30.1388	30.0505	29.7133	29.7308	29.5716	30.1436	30.2211	30.0447	28	28	28	59.8	59.8	59.8	53.71	0	223.2	5679500000	215	2.97695	0.00464207
1095	P28659-2;P28659-3;P28659;P28659-4	P28659-2;P28659-3;P28659;P28659-4	CUGBP Elav-like family member 1	Celf1	29.8738	29.1475	28.6244	30.1547	30.1334	29.1957	28.2837	28.0409	27.5878	12	11	11	33	30.9	30.9	51.589	0	151.7	3516600000	124	1.8952	0.0305219
1096	P28661;P28661-2;P28661-3;P28661-4;Q5ND09;Q5ND18;P28661-6;Q5ND13	P28661;P28661-2;P28661-3;P28661-4;Q5ND09;Q5ND18;P28661-6	Septin-4	2004-09-01	32.1541	32.05	32.2749	31.5479	31.2054	31.5022	32.6574	32.643	33.0386	31	30	10	73.4	73.4	32.4	54.935	0	323.31	31656000000	648	3.55203	0.00178456
1097	P28663;D6RHL2	P28663	Beta-soluble NSF attachment protein	Napb	33.1559	33.2901	33.1668	33.6905	33.528	33.5241	33.5114	33.7386	33.5916	29	29	25	89.3	89.3	75.8	33.557	0	323.31	71508000000	1042	2.454	0.0114837
1098	P28665	P28665	Murinoglobulin-1	Mug1	28.1804	28.1752	28.7801	27.9168	28.3413	27.6125	27.4976	26.8986	26.9685	18	18	8	18.2	18.2	10.6	165.3	0	46.029	1226300000	62	1.92741	0.0288364
1099	P28667	P28667	MARCKS-related protein	Marcksl1	30.1602	30.2478	30.4181	29.1382	29.8304	28.7943	31.4995	31.473	31.0522	3	3	3	17.5	17.5	17.5	20.165	0	160.81	9919500000	53	3.01436	0.00435266
1100	P28738;Q3TY51;Q8CHF1;A2ARD4	P28738;Q3TY51;Q8CHF1	Kinesin heavy chain isoform 5C;Kinesin-like protein	Kif5c;mKIAA0531	32.2268	32.1866	32.0602	31.6381	31.7419	31.6177	32.748	32.6731	32.5563	59	59	41	65.6	65.6	46.2	109.27	0	323.31	31097000000	746	4.65754	0.000305784
1101	Q68FM4;P28828;Q6PDN0;Q3TPN4;Q3V3S2	Q68FM4;P28828;Q6PDN0	Protein-tyrosine-phosphatase;Receptor-type tyrosine-protein phosphatase mu	Ptprm	28.0643	28.3465	28.4562	27.5437	26.9202	27.2425	29.3828	29.3443	29.5219	25	25	22	21.3	21.3	19	167.14	0	77.256	2025500000	95	4.20965	0.000611121
1102	Q53YN4;Q3TGE4;P28867;P28867-2;Q3UNG2;Q1MX41;Q1MX43;Q1MX40;Q1MX42;F1DGF6;Q80UN7;Q920N8;REV__Q9CS87;REV__Q9CSI0;REV__Q8BK20;REV__E9Q9T6;REV__Q6ZPL9;REV__Q810A4	Q53YN4;Q3TGE4;P28867;P28867-2;Q3UNG2;Q1MX41;Q1MX43;Q1MX40;Q1MX42;F1DGF6;Q80UN7	Protein kinase C delta type;Protein kinase C delta type;Protein kinase C delta type regulatory subunit;Protein kinase C delta type catalytic subunit;Protein kinase C	Prkcd	29.2119	28.9817	28.9631	27.766	27.7799	27.6953	29.4124	29.4572	29.316	18	18	17	32	32	30.6	77.546	0	65.576	2675500000	125	5.81382	6.6998e-05
1103	Q8BN32;Q3U8U8;P29341;Q99KL3;Q9D4E6;Q9DBE3;Q792Y0;Q62029;F6ZAX1;Q3V2M1;Q05DT1;B2RXY9;A2A5N3;Q921B8	Q8BN32;Q3U8U8;P29341;Q99KL3	Polyadenylate-binding protein;Polyadenylate-binding protein 1	Pabpc1	32.5295	32.6761	32.5996	32.4775	32.7921	32.6172	32.1698	32.0504	31.9183	34	34	24	61.3	61.3	45.4	70.669	0	323.31	32546000000	574	2.71671	0.00723961
1104	Q3U2F9;Q3THF3;P29387;Q3TY18	Q3U2F9;Q3THF3;P29387;Q3TY18	Guanine nucleotide-binding protein subunit beta-4	Gnb4	30.5129	30.5912	30.3416	30.3811	30.5717	30.2038	31.4233	31.7081	31.4178	18	11	11	72.4	49.1	49.1	37.391	0	323.31	9648900000	220	3.62633	0.00158074
1105	Q3UEK9;Q3UEK5;Q3TIU3;P29699	Q3UEK9;Q3UEK5;Q3TIU3;P29699	Alpha-2-HS-glycoprotein	Ahsg	26.899	26.8689	26.3603	25.2764	26.1718	25.7393	24.8311	24.9833	24.4393	5	5	5	31.3	31.3	31.3	37.325	0	15.333	305020000	23	2.82639	0.00594588
1106	Q545N7;P30275;A2ARP5;B0R0E9;B0R0E8;B0R0F0;REV__Q9DCG4	Q545N7;P30275;A2ARP5	Creatine kinase U-type, mitochondrial	Ckmt1	35.0699	34.9844	34.9545	35.6197	35.363	35.5399	34.8647	34.7151	34.9464	31	31	24	70.6	70.6	58.9	47.003	0	323.31	223650000000	2461	3.17665	0.00331685
1107	P30416;F6S2D5;D6RDE2;F7CAT1;Q8CBS1	P30416;F6S2D5	Peptidyl-prolyl cis-trans isomerase FKBP4;Peptidyl-prolyl cis-trans isomerase FKBP4, N-terminally processed;Peptidyl-prolyl cis-trans isomerase	Fkbp4	32.2044	32.1161	31.8967	31.7007	31.7066	31.7611	31.8588	31.7462	31.7373	31	31	31	72.5	72.5	72.5	51.572	0	293.43	20775000000	447	1.93593	0.028414
1108	Q3UAZ7;Q9CT19;Q3U566;P30681	Q3UAZ7;Q9CT19;Q3U566;P30681	High mobility group protein B2	Hmgb2	31.8413	31.6936	31.3902	31.4184	31.5236	31.2482	28.5118	27.9006	28.156	14	11	11	48.1	36.5	36.5	20.533	0	294.28	13267000000	134	5.49541	9.68528e-05
1109	Q3UZG4;P31230;Q8C2U7;Q3TUZ1	Q3UZG4;P31230;Q8C2U7	Aminoacyl tRNA synthase complex-interacting multifunctional protein 1;Endothelial monocyte-activating polypeptide 2	Aimp1	29.3257	29.3126	29.734	28.807	28.8964	28.7042	28.9381	28.7142	29.0476	16	16	16	73	73	73	35.166	0	85.64	3018900000	88	2.07624	0.0221278
1110	P31324;Q3V2X9;H3BK84	P31324;Q3V2X9;H3BK84	cAMP-dependent protein kinase type II-beta regulatory subunit	Prkar2b	28.7634	28.8569	28.8119	28.916	28.3705	28.6861	30.3279	30.1567	30.1832	15	12	12	46.6	36.8	36.8	46.167	0	100.42	3455600000	92	4.29699	0.000539801
1111	Q99LA8;P31428	Q99LA8;P31428	Dipeptidase;Dipeptidase 1	Dpep1	25.0948	24.9001	24.7499	23.6137	23.8061	24.0789	22.3136	22.4643	23.4523	3	3	3	9.5	9.5	9.5	45.724	0.0038996	1.9458	37211000	6	2.79922	0.00622734
1112	P31650;Q8BKG0;Q8CF74;D3YWZ5;Q99NG2;Q9R0X6;Q9JJ41;Q8C009;Q3UVW5;Q61327	P31650;Q8BKG0	Sodium- and chloride-dependent GABA transporter 3;Transporter	Slc6a11	30.1229	30.2071	30.3824	30.9305	31.3967	31.4213	29.8689	29.8081	29.5313	10	10	9	17.2	17.2	16.1	69.96	0	140.38	9333300000	136	3.53782	0.00182092
1113	Q548W7;P31786;Q4VWZ5;Q3ULV8;D3Z563;M0QWU8	Q548W7;P31786;Q4VWZ5;Q3ULV8;D3Z563	Acyl-CoA-binding protein	Dbi	33.024	33.0316	32.935	32.6491	32.4637	32.6581	33.8596	33.8031	33.6326	11	11	11	79.3	79.3	79.3	10	0	323.31	63359000000	551	4.73777	0.000270887
1114	Q9JJE1;Q3U3F4;Q3TMJ8;P31938;Q3UK05;Q3TMW4;E0CYY5;E9QJU1;E2QRQ0;REV__Q62028-2;REV__Q62028;Q9D413-2;Q9D413	Q9JJE1;Q3U3F4;Q3TMJ8;P31938;Q3UK05;Q3TMW4	Dual specificity mitogen-activated protein kinase kinase 1	Map2k1	31.4372	31.5467	31.4003	31.0955	31.1807	31.0215	32.0966	32.0176	31.8936	22	22	15	56	56	41	43.374	0	314.24	16537000000	305	4.36085	0.000493396
1115	P32020;P32020-2;A2APS4	P32020;P32020-2	Non-specific lipid-transfer protein	Scp2	30.9028	30.9261	30.2907	30.5376	30.3751	30.4583	31.2044	31.4616	31.3511	16	16	16	26.3	26.3	26.3	59.125	0	127.29	9526000000	189	2.11022	0.0209346
1116	Q564E6;P32067;Q8BTU4;Q3TG93;Q9CYB9;A2AR07;D6RI87;F6SXM5;Q3TV66	Q564E6;P32067;Q8BTU4;Q3TG93;Q9CYB9;A2AR07	Lupus La protein homolog	Ssb	31.5451	31.7635	31.8908	31.958	32.3428	32.5562	30.2005	30.0428	30.2158	29	29	28	56.6	56.6	55.2	47.756	0	322.46	18377000000	354	4.38337	0.000478398
1117	Q545M7;P32848	Q545M7;P32848	Parvalbumin alpha	Pvalb	33.6683	33.4059	33.2056	31.9712	32.2849	32.0915	33.1397	33.5698	33.2539	17	17	17	89.1	89.1	89.1	11.93	0	315.34	67284000000	964	3.37929	0.00238716
1118	P33146	P33146	Cadherin-15	Cdh15	29.0541	29.2661	29.303	30.6749	30.6325	30.5276	27.8932	27.5151	28.0816	23	23	23	39.2	39.2	39.2	85.643	0	323.31	5067200000	158	5.22638	0.000137829
1119	P35235;P35235-2;Q9CT18;Q05C78;Q63848;Q3UB72;Q3TE70;Q3UCJ0;P29351-3;P29351;P29351-2	P35235;P35235-2	Tyrosine-protein phosphatase non-receptor type 11	Ptpn11	30.4495	30.3581	30.3162	29.9358	30.0316	30.0972	30.8786	30.7881	30.7405	29	29	29	58.8	58.8	58.8	68.46	0	240.26	8994900000	265	4.40458	0.000463795
1120	Q3TJ39;P35278;Q3TCT9;Q8C266;A2A5F5	Q3TJ39;P35278;Q3TCT9;Q8C266	Ras-related protein Rab-5C	Rab5c	32.5087	32.5088	32.2639	32.2483	32.0796	32.0788	32.7416	32.398	32.5591	11	11	8	72.2	72.2	57.4	23.412	0	323.31	29376000000	385	1.61428	0.0498779
1121	Q0PD54;P35279	Q0PD54;P35279	Ras-related protein Rab-6A	Rab6a	33.4701	33.1768	33.2185	32.7111	32.6499	32.7565	33.7458	33.6087	33.292	16	16	1	75	75	10.6	23.59	0	323.31	69311000000	597	2.67612	0.00778737
1122	P35283;A2CG35	P35283;A2CG35	Ras-related protein Rab-12	Rab12	29.4412	29.2243	29.0778	29.0104	28.6395	28.351	29.997	29.7283	29.4844	19	19	19	76.5	76.5	76.5	27.328	0	82.211	3497700000	123	2.12963	0.0202618
1123	P35436	P35436	Glutamate receptor ionotropic, NMDA 2A	Grin2a	27.1735	26.1194	25.7838	29.5355	29.5153	28.4813	23.8201	23.3173	22.6435	32	30	30	26	25.4	25.4	165.42	0	89.132	1660800000	92	4.0408	0.000812957
1124	P35505;D3Z2R9	P35505	Fumarylacetoacetase	Fah	29.7772	30.1409	30.0143	31.1419	31.0201	30.8221	30.0223	30.2878	30.125	18	18	18	68	68	68	46.175	0	187.99	7322400000	133	3.28387	0.00275699
1125	Q3UJS2;P35550	Q3UJS2;P35550	rRNA 2-O-methyltransferase fibrillarin	Fbl	28.5021	28.3855	27.8321	28.9356	28.5518	28.8348	26.5023	26.6577	25.3597	16	13	13	52.3	44.6	44.6	34.375	0	79.938	2493800000	87	2.92581	0.00504575
1126	P35700;B1AXW5;B1AXW6;Q3U9J9;B1AXW4	P35700;B1AXW5;B1AXW6;Q3U9J9;B1AXW4	Peroxiredoxin-1	Prdx1	33.6673	33.4593	33.2919	33.1985	33.1994	33.2133	33.5686	33.5267	33.6404	17	17	16	69.8	69.8	69.8	22.176	0	323.31	67720000000	730	1.77023	0.0378562
1127	Q3UWG5;P35762	Q3UWG5;P35762	Tetraspanin;CD81 antigen	Cd81	32.5346	32.9588	33.3465	33.3311	33.3494	33.5352	32.635	32.6209	32.5882	4	4	4	30.9	30.9	30.9	25.828	0	323.31	42677000000	378	1.68755	0.0437813
1128	Q542P2;P35802	Q542P2;P35802	Neuronal membrane glycoprotein M6-a	Gpm6a	34.7776	34.6549	34.8043	33.766	34.0042	33.6347	35.4783	35.6002	35.4686	13	13	1	36.7	36.7	4.3	31.149	0	323.31	183530000000	825	5.05013	0.00017154
1129	P35846;E9Q543;E9PXL5;Q8CFX6;A1A4B2;E9PYD9;E9PXB5;Q9R223;E9Q3D3	P35846;E9Q543;E9PXL5;Q8CFX6;A1A4B2;E9PYD9	Folate receptor alpha	Folr1	28.4166	28.0534	27.413	22.6704	24.8536	22.4725	22.5783	23.2762	23.956	7	7	7	40.4	40.4	40.4	29.449	0	6.6498	369210000	19	2.96852	0.00471092
1130	P35922-9;E9QAS9;D3Z6U8;E9QNF5;P35922-8;P35922-7;P35922-11;P35922-10;P35922-12	P35922-9;E9QAS9;D3Z6U8;E9QNF5;P35922-8;P35922-7;P35922-11;P35922-10;P35922-12	Fragile X mental retardation protein 1 homolog	Fmr1	28.0448	27.9332	27.8694	28.7203	28.2996	28.5756	27.0648	26.3329	26.5831	18	16	1	35.2	30.5	1.9	64.096	0	209.7	1700100000	72	3.55728	0.00177172
1131	Q5BLK0;Q3TIQ2;P35979;Q8C2K0;Q6DI58	Q5BLK0;Q3TIQ2;P35979;Q8C2K0;Q6DI58	60S ribosomal protein L12	Rpl12	31.7543	31.5466	31.653	31.8	31.76	31.9128	30.2512	30.5229	30.0534	7	7	6	58.2	58.2	49.1	17.804	0	323.31	14710000000	222	4.46303	0.00042209
1132	Q642K1;Q58EW0;P35980;G3UZK4;Q0QEW9;G3UZJ6;G3UYV6;G3UX28	Q642K1;Q58EW0;P35980;G3UZK4;Q0QEW9;G3UZJ6	60S ribosomal protein L18	Rpl18	31.8602	31.6455	31.6923	31.9139	31.9219	31.8123	31.5646	31.0956	31.0518	7	7	7	41	41	41	21.643	0	213.62	15880000000	218	1.96447	0.0269704
1133	Q53Z43;P36895;Q60607;Q3UP52	Q53Z43;P36895;Q60607	Receptor protein serine/threonine kinase;Bone morphogenetic protein receptor type-1A	Bmpr1a	25.9073	25.5806	25.255	25.4378	25.0719	24.8694	26.6931	26.9529	26.6053	7	7	5	18.8	18.8	14.5	60.063	0	32.342	359610000	24	3.06156	0.00401194
1134	P36916;A2VDH5;Q52KE3;P36916-2	P36916;A2VDH5;Q52KE3;P36916-2	Guanine nucleotide-binding protein-like 1	Gnl1	29.9836	30.286	30.1067	29.6491	29.8084	29.7075	30.2553	29.9613	30.2454	26	26	26	50.2	50.2	50.2	68.77	0	235.55	6257200000	214	1.82243	0.0346429
1135	P37804	P37804	Transgelin	Tagln	27.2197	27.8155	27.3954	25.9145	25.3741	23.4617	29.0585	28.9031	30.1307	13	12	12	69.7	66.2	66.2	22.576	0	54.298	1775400000	62	2.67461	0.00779691
1136	Q3UMP2;P38060	Q3UMP2;P38060	Hydroxymethylglutaryl-CoA lyase, mitochondrial	Hmgcl	30.1251	30.1725	30.109	30.4499	30.8172	30.7118	30.8837	31.0186	30.7363	16	16	15	58.8	58.8	56.6	34.182	0	278.09	8759900000	207	2.82129	0.00599786
1137	P38647	P38647	Stress-70 protein, mitochondrial	Hspa9	33.9897	33.9331	33.928	34.0983	34.2845	34.2729	33.7419	33.7875	33.8699	48	47	47	66	64.9	64.9	73.46	0	323.31	101460000000	1388	2.90569	0.00521058
1138	P39038;Q80ZV4	P39038	Cadherin-4	Cdh4	26.5892	26.4624	26.6466	25.9799	26.1428	26.1517	27.3411	27.4193	27.6292	7	5	5	7.7	5.9	5.9	100.03	0	7.4408	499850000	33	4.70465	0.000283994
1139	P39053-4;P39053-5;P39053;P39053-2;F6TH70	P39053-4;P39053-5;P39053;P39053-2	Dynamin-1	Dnm1	35.7167	35.6129	35.6242	35.0514	35.1373	35.253	35.895	35.7629	35.737	79	79	1	79.2	79.2	2.1	97.423	0	323.31	282900000000	4110	3.7607	0.00127609
1140	P39053-6	P39053-6	Dynamin-1	Dnm1	25.6514	25.7658	24.9755	23.7387	24.5177	24.7015	26.2749	27.6029	27.0145	79	4	4	78	2.4	2.4	97.283	0	10.97	379280000	17	2.52667	0.0101182
1141	P39087;A3KMF1;A3KMF0;D3Z797;P39087-2;Q6PAQ0;Q8K0C2;E9Q2Y1	P39087;A3KMF1;A3KMF0;D3Z797;P39087-2	Glutamate receptor ionotropic, kainate 2	Grik2	29.1434	28.847	28.9655	30.2607	29.7818	29.9461	27.4028	27.3775	27.2925	23	23	21	30.5	30.5	27.6	102.49	0	148.93	3607800000	130	5.41238	0.000103379
1142	Q3UVJ2;P40124;Q3U0U5;Q3TC53;Q3UNQ0;B1ARS0	Q3UVJ2;P40124;Q3U0U5;Q3TC53;Q3UNQ0	Adenylyl cyclase-associated protein;Adenylyl cyclase-associated protein 1	Cap1	32.591	32.6284	32.4942	32.3788	32.7214	32.6214	33.1222	33.3455	33.3585	29	29	27	73	73	70	51.55	0	323.31	41182000000	519	3.03066	0.00423013
1143	P40142;Q9Z2L5;O55021;E0CY51	P40142	Transketolase	Tkt	34.107	34.1319	34.1895	34.2614	34.5774	34.4621	33.7178	33.5652	33.6533	42	42	42	83.9	83.9	83.9	67.63	0	323.31	94760000000	1328	3.55727	0.00177004
1144	Q3UII2;P40237;A2AIJ1;A2AIJ2	Q3UII2;P40237;A2AIJ1	Tetraspanin;CD82 antigen	Cd82	27.8917	28.1962	27.6468	29.132	27.9255	29.6047	24.3578	24.6174	24.7955	4	4	4	16.2	16.2	16.2	29.628	0	13.506	2011400000	30	3.79589	0.00120107
1145	P40240	P40240	CD9 antigen	Cd9	31.0912	31.0227	30.8304	31.2574	31.5342	31.2117	30.7567	30.8648	30.8895	7	7	7	26.5	26.5	26.5	25.258	0	323.31	9822100000	120	2.00435	0.0251876
1146	Q3TSW9;P40630-2;P40630;D3Z0F3	Q3TSW9;P40630-2;P40630;D3Z0F3	Transcription factor A, mitochondrial	Tfam	29.6413	29.4514	29.5481	29.774	29.9158	29.7715	29.4883	29.4355	29.47	14	14	13	44	44	41.6	27.986	0	66.341	5303300000	144	2.58766	0.00905606
1147	Q5M9N5;Q5M9J8;P41105;F6Z0X0	Q5M9N5;Q5M9J8;P41105	60S ribosomal protein L28	Rpl28	30.0904	30.667	29.8672	30.3982	30.4999	30.2603	29.6047	29.293	29.5062	8	8	8	50.4	50.4	50.4	15.709	0	64.07	6616300000	117	1.92583	0.0289307
1148	P42128;Q99LQ5	P42128	Forkhead box protein K1	Foxk1	26.8505	27.2407	27.0272	26.4124	26.5581	26.9336	24.9295	25.2579	25.6598	10	10	8	19.3	19.3	17.4	74.919	0	26.15	375240000	26	3.17051	0.00335642
1149	P42208;E9Q3V6;F6WYM0;D3YYB1;D3Z3C0;D3Z1S1;F6UKN5;D3YZU7;D3YV76;G3UYQ0	P42208;E9Q3V6;F6WYM0;D3YYB1;D3Z3C0	Septin-2	2002-09-01	31.255	31.3095	31.4098	31.8001	31.7782	32.0062	31.9693	32.0072	31.8457	18	18	18	59.3	59.3	59.3	41.525	0	323.31	14800000000	248	3.29779	0.00269625
1150	P42232;Q9JIA0;B2C3G8;P42230;Q6PHA0;Q9R0X9;Q3UZ79;A2A5D3;Q71UV3	P42232;Q9JIA0;B2C3G8;P42230	Signal transducer and activator of transcription 5B;Signal transducer and activator of transcription;Signal transducer and activator of transcription 5A	Stat5b;Stat5a	29.2945	29.0631	29.0476	28.5403	28.6867	28.5769	28.6968	28.9878	29.0652	17	17	16	25.3	25.3	24.4	90.001	0	40.367	2237400000	115	1.94414	0.0280292
1151	P42337;D3YY41	P42337;D3YY41	Phosphatidylinositol 4,5-bisphosphate 3-kinase catalytic subunit alpha isoform	Pik3ca	27.2427	26.8925	27.0913	26.9484	26.9085	27.2776	28.1795	28.2252	27.634	23	23	23	28.7	28.7	28.7	124.41	0	44.733	1164100000	46	2.34419	0.0138152
1152	Q80ZL3;P42567;Q5JC28;H3BK65;F6W2Q5;P42567-2;H3BJB8;H3BLE4	Q80ZL3;P42567;Q5JC28;H3BK65;F6W2Q5	Epidermal growth factor receptor substrate 15	Eps15	30.007	30.1257	30.1476	29.3877	29.3134	29.5201	30.6972	30.6103	30.8433	30	30	30	45	45	45	98.47	0	314.05	5823000000	221	4.90535	0.000210883
1153	P42669;Q8C6E9;Q8BSA6;Q9WTR0	P42669;Q8C6E9	Transcriptional activator protein Pur-alpha	Pura	33.0636	33.2042	33.6414	33.4725	33.1825	33.5387	32.5706	32.5384	32.6251	18	15	15	58.3	54.2	54.2	34.883	0	323.31	55764000000	453	2.26564	0.0157958
1154	Q3UL22;P42932;Q3UKQ2;Q6A0F1;Q9WVS5;Q8BVY8;H3BL49;Q9CS06;Q9CRW7;H3BJB6;H3BKG2;H3BLL1;H3BKR8	Q3UL22;P42932;Q3UKQ2;Q6A0F1;Q9WVS5;Q8BVY8;H3BL49;Q9CS06	T-complex protein 1 subunit theta	Cct8;Cctq	33.1874	33.0885	33.0554	32.7079	32.8281	32.6604	32.9757	33.0926	32.8918	42	42	42	76.1	76.1	76.1	59.555	0	323.31	43030000000	748	2.33309	0.0140746
1155	Q9DCW5;P43024	Q9DCW5;P43024	Cytochrome c oxidase subunit 6A, mitochondrial;Cytochrome c oxidase subunit 6A1, mitochondrial	Cox6a1	27.3913	23.5353	26.4117	28.1346	29.6189	27.7983	23.5703	22.5737	24.1543	2	2	2	40.2	40.2	40.2	12.483	0	48.237	1899200000	63	1.95173	0.0275955
1156	Q80V79;Q3TZI5;P43247;G3UXD8;G3UWZ8	Q80V79;Q3TZI5;P43247	DNA mismatch repair protein Msh2	Msh2	28.3	28.7809	27.2505	28.6747	28.6324	28.6183	25.4224	25.3666	24.3896	29	29	29	41.1	41.1	41.1	104.2	0	49.311	1446500000	91	3.32086	0.00261013
1157	P43274	P43274	Histone H1.4	Hist1h1e	34.7882	34.9497	34.908	35.3164	35.6327	35.6056	33.3424	33.3939	33.1886	20	20	6	42	42	18.3	21.977	0	323.31	187830000000	847	5.70852	7.27693e-05
1158	P43275	P43275	Histone H1.1	Hist1h1a	32.6295	32.675	33.0485	33.5399	33.4809	33.6474	31.0405	30.7691	31.1414	15	10	10	39.9	31.5	31.5	21.785	0	323.31	57407000000	405	5.21768	0.000138653
1159	Q1WWK3;P43276	Q1WWK3;P43276	Histone H1.5	Hist1h1b	33.7576	33.7882	33.5948	34.2428	34.4177	34.5207	31.993	31.7287	31.9778	16	10	10	38.3	27	27	22.445	0	158.58	75579000000	408	5.94449	5.59285e-05
1160	Q149Z9;P43277	Q149Z9;P43277	Histone H1.3	Hist1h1d	34.565	34.7587	35.0535	34.1848	34.206	35.1328	32.4271	32.5113	32.7929	18	4	0	38.5	14.9	0	22.099	0	50.074	118500000000	328	3.25545	0.00288504
1161	Q3UHW9;P45591	Q3UHW9;P45591	Cofilin-2	Cfl2	30.1924	30.6548	30.293	29.8322	30.3295	30.0784	30.7988	30.7274	30.6727	14	10	10	81.9	65.1	65.1	18.709	0	129.43	8618800000	217	1.65588	0.0463379
1162	P45952;Q91WS8;Q8BJT5;Q3V2I9;D6RFD7;D3Z2A5	P45952;Q91WS8;Q8BJT5	Medium-chain specific acyl-CoA dehydrogenase, mitochondrial	Acadm	30.1588	30.1488	30.3062	30.1126	30.0865	30.1862	30.6308	30.448	30.3436	16	16	16	48.5	48.5	48.5	46.481	0	253.48	6927300000	182	1.84933	0.0330267
1163	P46414;Q4FJM2	P46414;Q4FJM2	Cyclin-dependent kinase inhibitor 1B	Cdkn1b	25.8372	25.4144	27.0069	26.4135	25.6851	25.4216	24.6043	23.8682	24.301	5	5	5	43.1	43.1	43.1	22.193	0	44.07	349590000	20	1.71558	0.0417378
1164	P46660	P46660	Alpha-internexin	Ina	33.6053	33.6376	33.6423	34.7669	34.6977	35.0976	32.8748	32.9909	33.0198	43	37	17	74.9	69.1	31.7	55.382	0	323.31	120800000000	1423	5.20118	0.000141547
1165	Q3UR19;Q3TWA9;P46684;A2AWK6;Q6P1Z7;Q66JW1;Q62521-2;Q62521	Q3UR19;Q3TWA9;P46684;A2AWK6;Q6P1Z7;Q66JW1;Q62521-2;Q62521	Zinc finger protein ZIC 1;Zinc finger protein ZIC 3	Zic1;Zic3	26.3311	26.2205	26.3843	26.2926	26.3045	26.9434	25.1435	25.3076	24.1805	7	4	4	20.5	13.2	13.2	47.456	0	15.542	412000000	14	2.25034	0.0162393
1166	Q7TQD7;P46735;E9QNH6;E9Q580;P46735-2;Q3TTZ3;Q3UEQ4;Q3TEP4;D3YV80;O88329;Q91ZI6	Q7TQD7;P46735;E9QNH6;E9Q580;P46735-2;Q3TTZ3;Q3UEQ4	Unconventional myosin-Ib	Myo1b	28.4712	28.7264	28.6706	28.1562	28.5343	28.2692	29.737	29.5471	29.4327	30	30	30	28.7	28.7	28.7	132.05	0	83.944	2606000000	132	3.70334	0.00139665
1167	Q8BMP9;Q5U412;Q3UA28;Q3U9H4;Q3U573;Q3TUR1;Q3TG02;P46978;Q3TVN9;Q3U547;Q8BWT4;D3YZN5	Q8BMP9;Q5U412;Q3UA28;Q3U9H4;Q3U573;Q3TUR1;Q3TG02;P46978;Q3TVN9;Q3U547	Dolichyl-diphosphooligosaccharide--protein glycosyltransferase subunit STT3A	Stt3a	29.2676	29.026	28.9597	29.2011	29.0403	29.2009	28.2244	28.2623	28.3925	17	17	15	23	23	21.1	80.53	0	34.635	2650000000	114	3.68729	0.00143072
1168	P47199;Q80XR3;Q3UYY0;V9GXY8;D3YUG9;D3Z2X0;D3YWU6;D3Z4Q4	P47199;Q80XR3;Q3UYY0;V9GXY8	Quinone oxidoreductase	Cryz	30.0367	30.3165	30.4702	29.7441	29.8666	29.9802	30.6844	30.7976	31.0026	18	18	18	66.2	66.2	66.2	35.268	0	130.75	6707300000	148	2.85752	0.00564103
1169	Q768S5;P47708	Q768S5;P47708	Rabphilin-3A	Rph3a	32.9155	32.6642	32.8691	31.7606	32.0093	31.9851	34.137	33.9778	34.1428	42	42	40	63.3	63.3	61.1	75.492	0	323.31	49534000000	816	5.69746	7.33952e-05
1170	Q544B1;Q3UJW1;Q3U9J7;Q3TVM2;P47738;Q3U6I3;D3YYF3	Q544B1;Q3UJW1;Q3U9J7;Q3TVM2;P47738;Q3U6I3	Aldehyde dehydrogenase, mitochondrial	Aldh2	32.9877	33.0705	33.1854	32.4135	32.2831	32.4175	32.7019	32.7662	32.8736	27	25	24	57	55.5	53.9	56.537	0	323.31	39378000000	641	3.72072	0.00135795
1171	P47746;Q99NU3	P47746;Q99NU3	Cannabinoid receptor 1	Cnr1	28.7933	28.954	28.8909	26.9066	27.6111	27.3349	30.193	30.0802	30.0101	9	9	9	15.6	15.6	15.6	52.83	0	17.587	3591500000	66	4.90752	0.000210373
1172	Q5DQJ3;Q3UBZ3;P47754;Q3UCD2;Q3U7G3;D6RCW7	Q5DQJ3;Q3UBZ3;P47754;Q3UCD2;Q3U7G3;D6RCW7	F-actin-capping protein subunit alpha-2	Capza2	32.5029	32.4798	32.7777	32.238	32.4288	32.1994	32.8817	32.9147	32.8803	20	20	14	75.2	75.2	58.7	32.967	0	323.31	40146000000	628	2.60133	0.0088464
1173	P47757	P47757	F-actin-capping protein subunit beta	Capzb	27.3836	27.6719	27.5038	24.0142	23.2575	24.5398	27.9797	27.6487	28.0679	21	2	2	73.3	6.9	6.9	31.345	0.00015272	4.8245	1050600000	22	4.45466	0.000428696
1174	Q923G3;P47757-2;A2AMW0;P47757-4;Q3TVK4;Q3TRH8;F7CAZ6;F6YHZ8;P97856;Q9D9A5	Q923G3;P47757-2;A2AMW0;P47757-4;Q3TVK4;Q3TRH8;F7CAZ6	F-actin-capping protein subunit beta	Capzb	32.2422	32.3095	32.2767	31.9988	32.2487	31.9963	32.6908	32.6086	32.6945	25	25	6	76.5	76.5	8.8	30.628	0	323.31	35482000000	555	3.21502	0.00310736
1175	Q5U421;P47811-3;P47811;P47811-4;B2KF34;B2KF35;P47811-2	Q5U421;P47811-3;P47811;P47811-4	Mitogen-activated protein kinase;Mitogen-activated protein kinase 14	Mapk14	26.3824	26.3351	26.2372	25.3873	24.9527	24.8589	26.1765	26.1438	26.5302	8	8	8	25.3	25.3	25.3	41.487	0	10.704	324360000	27	3.30661	0.0026638
1176	P47856-2;P47856;Q3V0X4;Q9Z2Z9;D3YYD9;D3YYE0	P47856-2;P47856	Glutamine--fructose-6-phosphate aminotransferase [isomerizing] 1	Gfpt1	27.0978	26.66	27.4817	26.1478	26.937	26.3004	27.8207	27.6323	27.3675	15	15	15	26.7	26.7	26.7	76.722	0	88.726	773930000	43	1.62786	0.0486474
1177	P47857;Q99K08;Q1LZL7;O35514	P47857;Q99K08	ATP-dependent 6-phosphofructokinase, muscle type;ATP-dependent 6-phosphofructokinase	Pfkm	35.0385	34.9487	34.9891	35.0171	34.9252	34.8654	35.4538	35.4783	35.4422	44	44	39	62.4	62.4	56.8	85.268	0	323.31	212550000000	2801	4.4776	0.000412022
1178	Q3UCH0;P47911;E9PUX4;Q3UFI4	Q3UCH0;P47911;E9PUX4;Q3UFI4	60S ribosomal protein L6	Rpl6;Gm5428	32.2039	32.48	32.2724	32.1228	32.3842	32.2596	31.3869	31.298	31.2646	18	18	18	45.3	45.3	45.3	33.509	0	323.31	23131000000	319	4.12003	0.000714434
1179	Q58EU6;Q3U850;P47962;Q3TKR5;Q3THE1;D3YYV8	Q58EU6;Q3U850;P47962;Q3TKR5;Q3THE1;D3YYV8	60S ribosomal protein L5	Rpl5	31.4311	31.3207	31.1294	31.3191	31.5286	31.1464	30.3704	30.4243	30.1383	16	16	16	45.8	45.8	45.8	34.4	0	99.218	15898000000	309	3.35107	0.00249085
1180	P47963;Q5RKP3	P47963;Q5RKP3	60S ribosomal protein L13	Rpl13	31.5166	31.3773	31.5911	31.3719	31.276	31.284	30.7382	30.6492	30.3923	8	8	8	36.5	36.5	36.5	24.305	0	262.99	14693000000	256	3.57348	0.00172538
1181	P48036	P48036	Annexin A5	Anxa5	32.8295	33.0352	33.0705	33.3784	33.1809	33.2302	32.8158	32.8476	32.9312	27	27	27	71.5	71.5	71.5	35.752	0	323.31	60670000000	761	2.11456	0.0207434
1182	Q8K1V9;P48302;Q8BJE1;Q61614	Q8K1V9;P48302;Q8BJE1	Endothelin B receptor	Ednrb	27.7154	27.2116	27.6771	26.9143	26.9449	26.5438	28.2566	28.1574	28.3357	8	8	8	18.6	18.6	18.6	49.461	0	43.194	1388000000	73	3.29433	0.00271336
1183	Q548L4;P48320;Q3URJ3	Q548L4;P48320	Glutamate decarboxylase 2	Gad2	31.926	31.805	31.8921	31.9092	32.0875	31.8337	31.5683	31.5328	31.2287	27	27	25	62.9	62.9	56.8	65.223	0	264.16	21201000000	436	2.08536	0.0218263
1184	P48379-2;P48379	P48379-2;P48379	DNA-binding protein RFX2	Rfx2	22.584	24.8604	24.1942	26.8992	27.1881	27.0022	23.0196	23.4462	23.5522	5	3	2	9.4	5.9	3.3	76.533	0.00044451	4.1473	265590000	11	2.8777	0.0054492
1185	Q544N3;P48543	Q544N3;P48543	G protein-activated inward rectifier potassium channel 3	Kcnj9	22.8019	24.5934	23.1749	25.6022	25.3183	26.0306	24.1933	23.8164	24.7304	5	4	4	17.3	15.8	15.8	43.973	0	14.737	233940000	7	1.75489	0.0389126
1186	P48678;P48678-2;P48678-3;D3YUF7;Q9CTL2;Q8BNX5	P48678;P48678-2;P48678-3	Prelamin-A/C;Lamin-A/C	Lmna	32.5721	32.5122	32.4215	33.1303	32.9803	33.1275	31.536	31.4962	31.354	48	46	46	65.1	63.8	63.8	74.237	0	323.31	39595000000	577	5.88388	5.98087e-05
1187	P48722;P48722-2;E0CY23;Q3TTD4;F6SMW7;F6TFH3	P48722;P48722-2;E0CY23	Heat shock 70 kDa protein 4L	Hspa4l	33.6845	33.6876	33.6882	33.496	33.5728	33.4361	33.6069	33.6223	33.5826	61	58	58	78.8	76	76	94.381	0	323.31	66142000000	967	2.34707	0.0137689
1188	Q3U3I5;P49135;Q3TVD8;Q8R1K9	Q3U3I5;P49135;Q3TVD8	TFIIH basal transcription factor complex helicase XPB subunit	Ercc3	25.9758	25.9483	25.6596	26.5764	26.6543	25.9901	22.7462	24.6956	24.9616	12	12	12	21.3	21.3	21.3	89.141	0	12.423	282010000	21	1.66781	0.0453592
1189	Q3U7F3;Q3TIK8;Q5EBP8;Q3UK83;P49312;Q3TFB1;P49312-2;B7ZWG9;V9GXF8	Q3U7F3;Q3TIK8;Q5EBP8;Q3UK83;P49312;Q3TFB1;P49312-2	Heterogeneous nuclear ribonucleoprotein A1;Heterogeneous nuclear ribonucleoprotein A1, N-terminally processed	Hnrnpa1	33.0026	33.0129	32.9859	33.21	33.6744	33.6531	31.4349	31.5405	31.4907	23	21	21	60	57.2	57.2	34.238	0	323.31	54173000000	602	5.0248	0.000175642
1190	P49442;E0CYQ4;E0CX64;H3BK26;E9QAI9	P49442	Inositol polyphosphate 1-phosphatase	Inpp1	30.8354	31.0411	30.7717	30.2978	30.0072	30.23	31.5612	31.5746	31.5813	16	16	16	52	52	52	43.346	0	94.381	10956000000	211	4.6272	0.000321094
1191	P49443;Q9EQE2;Q9EQE3;Q8R4T7	P49443;Q9EQE2;Q9EQE3;Q8R4T7	Protein phosphatase 1A	Ppm1a	29.693	30.0194	30.0526	29.2515	29.2707	29.4246	29.6343	30.1019	30.0114	20	17	17	55.8	47.6	47.6	42.432	0	88.719	4421500000	165	1.90271	0.030131
1192	Q3V1H5;P49446-3;P49446-2;P49446;Q3TU63;Q05CJ9	Q3V1H5;P49446-3;P49446-2;P49446;Q3TU63	Receptor-type tyrosine-protein phosphatase;Receptor-type tyrosine-protein phosphatase epsilon;Protein-tyrosine-phosphatase	Ptpre	27.2456	27.2426	27.4313	27.7492	27.4902	27.4826	28.0105	28.0497	28.3125	25	21	21	37.3	31.6	31.6	82.654	0	31.733	1065800000	68	2.92681	0.00504073
1193	P49452;Q3UPF6;Q9CRZ7;Q3UUX2	P49452	Centromere protein C	Cenpc	23.9626	24.5658	23.8808	26.3237	27.021	26.3562	23.32	23.1934	23.5005	10	10	10	12.9	12.9	12.9	102.15	0	10.674	205110000	16	4.32407	0.000517315
1194	P49586;D3Z3T5	P49586;D3Z3T5	Choline-phosphate cytidylyltransferase A	Pcyt1a	27.2643	27.5555	27.6684	27.5329	27.7241	27.5	26.1389	25.9442	25.6458	12	12	8	46	46	30	41.666	0	36.209	831180000	45	4.09991	0.000738741
1195	P49817;P49817-2;D3Z148;H3BKG0;H3BLK5;D3Z0J2;P51637	P49817;P49817-2;D3Z148	Caveolin-1;Caveolin	Cav1	27.7693	27.8622	28.2282	26.6308	27.3291	26.9533	28.0741	28.3057	27.9963	8	8	8	55.6	55.6	55.6	20.538	0	13.484	1006200000	44	2.46303	0.0113036
1196	Q3UFJ8;P50153	Q3UFJ8;P50153	Guanine nucleotide-binding protein subunit gamma;Guanine nucleotide-binding protein G(I)/G(S)/G(O) subunit gamma-4	Gng4	24.317	24.7017	25.5292	26.6433	26.3885	26.3188	24.6381	25.4187	24.1641	2	2	2	44	44	44	8.3897	0	10.029	336120000	20	1.92342	0.0290381
1197	P50171;P50171-2;G3UX44;A0A068BEQ2	P50171;P50171-2;G3UX44;A0A068BEQ2	Estradiol 17-beta-dehydrogenase 8	Hsd17b8;H2-Ke6	29.4541	29.6599	29.4151	28.9427	28.7815	28.6105	29.6473	29.5615	29.7846	12	12	12	70.7	70.7	70.7	26.588	0	168.63	3880000000	125	3.30907	0.00265533
1198	Q3TF14;P50247;Q5M9P0;Q3U4D1;Q3U5U5;Q8BPI7;A2ALT5	Q3TF14;P50247;Q5M9P0;Q3U4D1;Q3U5U5;Q8BPI7	Adenosylhomocysteinase	Ahcy	32.116	31.7391	31.8789	31.431	31.3478	31.4065	31.8904	31.8896	31.6213	27	27	27	65.7	65.7	65.7	47.688	0	323.31	21099000000	370	1.9777	0.0263916
1199	P50396;D6RI86;B7FAU8	P50396	Rab GDP dissociation inhibitor alpha	Gdi1	34.4177	34.1412	34.0917	33.8704	33.7827	33.8454	34.5534	34.4323	34.439	36	29	29	82.8	67.8	67.8	50.521	0	323.31	120610000000	1356	2.91149	0.00515135
1200	P50428;F6QGM0	P50428	Arylsulfatase A	Arsa	27.0114	26.6653	26.6581	27.4463	28.0916	27.9414	26.5955	26.2879	26.3003	9	9	8	23.7	23.7	22.3	53.748	0	50.77	694330000	45	2.9875	0.00455524
1201	P50518	P50518	V-type proton ATPase subunit E 1	Atp6v1e1	33.4159	33.0623	33.06	32.6585	32.9576	32.7443	33.7775	33.3842	33.2553	18	18	12	70.8	70.8	53.5	26.157	0	323.31	64222000000	770	1.64772	0.0470063
1202	Q53WT3;P50571	Q53WT3;P50571	Gamma-aminobutyric acid receptor subunit beta-1	Gabrb1	31.5769	31.5052	31.5592	31.7287	31.7003	31.502	31.3553	31.4335	31.1853	15	15	8	32.7	32.7	18.4	54.1	0	119.22	15812000000	312	1.61343	0.0499434
1203	Q05BN2;Q3UMW2;Q3TGU7;P50580;D3YVH7	Q05BN2;Q3UMW2;Q3TGU7;P50580;D3YVH7	Proliferation-associated protein 2G4	Pa2g4	31.3048	31.4916	31.2086	31.4836	31.3417	31.3478	30.3811	30.3982	30.392	23	23	23	63.4	63.4	63.4	41.508	0	208.23	11524000000	257	4.66338	0.000303631
1204	Q4VA41;P50586-2;P50586;Q3TMT9	Q4VA41;P50586-2;P50586	Tubby-like protein;Tubby protein	Tub	25.105	24.9444	24.3333	24.3071	24.185	21.7727	26.5856	26.3785	26.2005	9	9	8	23.2	23.2	21.8	55.361	0	15.405	237550000	21	1.78797	0.0367545
1205	Q4FJQ0;P51150;E0CZ42;D3YXV0;B7ZN98;E9PYR6;Q9ESF1-3;Q9ESF1-2;Q9ESF1	Q4FJQ0;P51150	Ras-related protein Rab-7a	Rab7;Rab7a	32.7758	32.709	32.7797	32.4276	32.4203	32.5611	32.7861	32.9231	33.0256	21	21	21	86	86	86	23.489	0	323.31	39894000000	701	2.66864	0.00784738
1206	P51174	P51174	Long-chain specific acyl-CoA dehydrogenase, mitochondrial	Acadl	32.1504	32.4329	31.9917	32.5149	32.7201	32.6305	31.8839	31.9907	31.9314	21	21	21	43.5	43.5	43.5	47.907	0	323.31	30260000000	580	2.47748	0.0110501
1207	Q5EBQ6;P51410;Q5M9J5;D3Z629;D3YZT0;S4R1R7	Q5EBQ6;P51410;Q5M9J5;D3Z629	60S ribosomal protein L9	Rpl9	31.0111	30.5868	30.5892	31.4762	31.672	31.4575	30.3616	30.3638	30.1704	12	12	12	67.7	67.7	67.7	21.881	0	187.25	10404000000	279	3.50466	0.00191577
1208	Q3TWI4;P51432;Q8CI86;Q571K9;Q3TPL1;Q8C8I0;Q9R1Y4;Q62076	Q3TWI4;P51432;Q8CI86;Q571K9	Phosphoinositide phospholipase C;1-phosphatidylinositol 4,5-bisphosphate phosphodiesterase beta-3	Plcb3	30.3587	30.4191	30.2541	28.792	29.2734	29.2404	30.9323	30.8542	30.7572	48	48	48	42.8	42.8	42.8	139.5	0	261.68	6789100000	332	4.3805	0.000480726
1209	P51655	P51655	Glypican-4;Secreted glypican-4	Gpc4	26.1124	25.9185	26.4383	25.3698	24.9011	25.6328	27.1849	27.1154	27.1376	9	7	7	21.4	16.9	16.9	62.586	0	11.035	287210000	25	3.3731	0.00240671
1210	Q3UHW2;Q3TT11;P51660	Q3UHW2;Q3TT11;P51660	Peroxisomal multifunctional enzyme type 2;(3R)-hydroxyacyl-CoA dehydrogenase;Enoyl-CoA hydratase 2	Hsd17b4	31.9703	32.0238	32.1242	31.3238	31.5829	31.4363	32.3244	32.3292	32.4542	36	36	36	54.8	54.8	54.8	79.423	0	323.31	22153000000	446	4.14228	0.000691696
1211	P51791;Q790S0;Q8K4W8;Q6PGA5;P51791-2;Q3TTK0;Q8K4X1;Q3TF45;Q8K4W7;Q8K4W9;E9Q2I1;Q6PEV2;Q3UEX5	P51791;Q790S0;Q8K4W8;Q6PGA5;P51791-2;Q3TTK0;Q8K4X1;Q3TF45;Q8K4W7;Q8K4W9;E9Q2I1;Q6PEV2;Q3UEX5	H(+)/Cl(-) exchange transporter 3;Chloride channel protein	Clcn3	29.3715	29.5208	29.5812	28.4862	28.6671	28.8759	30.02	29.938	29.8626	17	17	13	23	23	18.1	90.868	0	55.739	3147500000	149	4.08728	0.000753055
1212	P51830;E9Q706;Q3UWC8	P51830;E9Q706	Adenylate cyclase type 9	Adcy9	28.2521	28.2368	28.8133	28.4847	28.7127	28.4679	29.3819	29.2569	29.2074	26	26	26	24.3	24.3	24.3	150.95	0	101.01	2893000000	95	2.26416	0.0158428
1213	P51859;E0CXA0;E0CYW7	P51859;E0CXA0	Hepatoma-derived growth factor	Hdgf	30.99	30.9002	31.3618	31.1636	31.2755	31.4871	28.2566	27.9841	28.5664	17	16	16	73	69.6	69.6	26.268	0	194.37	12151000000	223	5.12549	0.000158682
1214	P51863;Q921S5	P51863;Q921S5	V-type proton ATPase subunit d 1	Atp6v0d1	33.3796	33.4239	33.4593	33.2976	33.3158	33.4116	33.7986	33.8	33.9405	22	22	22	62.7	62.7	62.7	40.301	0	323.31	67276000000	830	3.86489	0.0010739
1215	Q5NDA4;P51880;E9Q0H6	Q5NDA4;P51880;E9Q0H6	Fatty acid-binding protein, brain	Fabp7	31.7449	31.4962	31.5883	30.1268	30.7272	30.414	32.4011	32.3427	32.3119	8	8	8	62.9	62.9	62.9	14.894	0	323.31	15880000000	199	4.30827	0.000532927
1216	Q9D393;P51906;Q8VI14;Q6P1Z8;Q9QWI2	Q9D393;P51906;Q8VI14;Q6P1Z8	Amino acid transporter;Excitatory amino acid transporter 3	Slc1a1	25.1906	25.1597	24.8312	26.5632	26.4003	25.781	24.6135	24.5703	25.0033	4	4	4	11.3	11.3	11.3	56.709	0	29.913	298460000	19	2.73696	0.0069822
1217	P51910	P51910	Apolipoprotein D	Apod	25.2639	23.5434	24.0064	26.9871	26.1249	25.9437	24.6272	24.8792	24.8585	2	2	2	14.3	14.3	14.3	21.53	0	17.654	291050000	13	1.84947	0.0330283
1218	Q545S0;P52196	Q545S0;P52196	Sulfurtransferase;Thiosulfate sulfurtransferase	Tst	31.7947	31.7486	31.5683	32.5819	32.726	32.6846	32.0277	31.7536	31.8447	20	20	19	60.9	60.9	58.9	33.466	0	323.31	29422000000	377	3.9682	0.000913527
1219	P52431;Q91VT0;Q8C2N0;D6RFB8;D3YVY8	P52431;Q91VT0;Q8C2N0;D6RFB8	DNA polymerase delta catalytic subunit;DNA polymerase	Pold1	26.6514	26.371	25.6051	25.6489	26.6026	27.1583	23.8146	25.2142	24.416	17	17	17	19.4	19.4	19.4	123.79	0	11.741	284660000	22	1.65391	0.0464896
1220	P52479;P52479-2;G3X9U6	P52479;P52479-2	Ubiquitin carboxyl-terminal hydrolase 10	Usp10	27.821	28.1088	28.0973	27.8073	27.8789	27.6748	26.6043	26.8485	26.6378	12	12	11	23.7	23.7	23	87.021	0	53.261	1185900000	63	4.34176	0.000503374
1221	P52480	P52480	Pyruvate kinase PKM	Pkm	35.7922	35.7399	35.8667	36.1736	35.8471	36.1394	35.453	35.5821	35.7377	49	49	5	79.5	79.5	9.4	57.844	0	323.31	386860000000	4050	1.75373	0.038977
1222	P52483;D3YXD1;Q91W82;B2FDH0;D3YW10;B2FDH7	P52483;D3YXD1;Q91W82;B2FDH0	Ubiquitin-conjugating enzyme E2 E3;Ubiquitin-conjugating enzyme E2 E2	Ube2e3;Ube2e2	27.1248	27.9364	27.9046	26.7827	26.2705	26.8973	24.9696	25.986	24.6956	5	5	2	32.9	32.9	15	22.912	0	10.967	526680000	23	2.4857	0.0108759
1223	P52503	P52503	NADH dehydrogenase [ubiquinone] iron-sulfur protein 6, mitochondrial	Ndufs6	29.1508	29.8299	30.0303	30.2287	30.4974	30.6236	29.5084	29.326	29.4671	8	8	8	65.5	65.5	65.5	13.02	0	270.03	7224600000	124	1.88008	0.0312827
1224	P52760	P52760	Ribonuclease UK114	Hrsp12	32.1594	32.2301	32.1273	31.6171	31.9151	31.8388	32.2586	32.5748	32.8328	11	11	11	87.4	87.4	87.4	14.255	0	172.97	24462000000	328	2.09995	0.0213128
1225	Q4FJM3;Q3V1E0;P52800;F6RSU6	Q4FJM3;Q3V1E0;P52800	Ephrin-B2	Efnb2	26.7872	26.3668	26.9082	25.1299	24.7068	22.6968	27.7412	27.8923	28.6228	7	7	7	29.5	29.5	29.5	37.202	0	13.291	532160000	24	2.51684	0.0102804
1226	Q3UN55;P52825;Q3UDA8;A2A8E8;A2A8E7;Q9CU20;A2A8E9	Q3UN55;P52825;Q3UDA8	Carnitine O-palmitoyltransferase 2, mitochondrial	Cpt2	30.3128	30.3672	30.4388	30.3699	30.4912	30.6007	29.8878	29.9121	29.8532	31	31	31	52	52	52	73.964	0	155.81	6088900000	235	3.75907	0.00127948
1227	P52875;B2RUD1	P52875;B2RUD1	Transmembrane protein 165	Tmem165	25.0279	25.4074	25.7444	25.6036	25.6642	25.9105	24.1058	24.7157	24.8906	2	2	2	11.1	11.1	11.1	34.79	0	7.4232	234720000	15	1.89076	0.0307122
1228	P53702;Q8BP79;G3UXK7	P53702;Q8BP79	Cytochrome c-type heme lyase	Hccs	27.8338	27.641	27.6693	28.4996	27.7908	27.981	27.3883	27.2913	27.2206	13	13	13	55.1	55.1	55.1	30.977	0	121.13	1484700000	63	1.83023	0.0341348
1229	Q5ND42;Q3UE53;Q3TGI6;P53810;Q3TIQ3;J3QQ30;J3QPW1;F8WGG5	Q5ND42;Q3UE53;Q3TGI6;P53810;Q3TIQ3;J3QQ30;J3QPW1	Phosphatidylinositol transfer protein alpha isoform	Pitpna	32.353	32.2881	32.4632	31.6453	31.7332	31.6439	32.1502	32.3748	32.577	24	24	22	79.3	79.3	73.1	31.893	0	212.3	27526000000	437	2.94477	0.0048906
1230	P54071;D6RIL6	P54071;D6RIL6	Isocitrate dehydrogenase [NADP], mitochondrial	Idh2	32.1625	32.1212	32.0883	32.2181	31.8686	31.8842	31.5149	31.4404	31.2481	29	29	28	53.5	53.5	53.5	50.906	0	237.27	20323000000	408	2.78549	0.00637769
1231	Q545B6;P54227;Q9DCP3;Q91XT3;D3Z1Z8;D3Z5N2;Q9CYU5;Q9CXQ8;Q8C2H3	Q545B6;P54227;Q9DCP3;Q91XT3;D3Z1Z8;D3Z5N2;Q9CYU5;Q9CXQ8;Q8C2H3	Stathmin	Stmn1	28.5304	28.6721	29.0028	29.4027	29.5919	29.6505	26.9268	26.9403	27.1672	8	8	6	39.6	39.6	32.9	17.274	0	80.433	2392900000	52	5.21339	0.000139542
1232	Q8C2N9;P54276;Q9CRH0;Q61061	Q8C2N9;P54276	DNA mismatch repair protein Msh6	Msh6	27.4371	27.6948	27.9066	28.1359	28.0626	27.5219	25.3427	25.4361	24.9353	24	24	24	24	24	24	150.98	0	35.022	972330000	70	4.36519	0.000491041
1233	Q05DT7;Q8CAP3;P54726;Q3TN85;Q8BRA9;Q9D717;F6YL88	Q05DT7;Q8CAP3;P54726;Q3TN85;Q8BRA9	UV excision repair protein RAD23 homolog A	Rad23a	27.2829	26.6953	27.1046	28.068	28.32	28.3173	26.7601	27.5949	26.1252	12	9	9	58.7	53.9	53.9	38.155	0	12.472	855280000	27	1.68965	0.0435982
1234	P54818;Q3TTJ1	P54818;Q3TTJ1	Galactocerebrosidase	Galc	26.0097	26.5812	25.7232	27.0363	27.2373	27.2348	26.0945	26.2994	26.1653	7	7	7	17.8	17.8	17.8	77.256	0	8.5143	357810000	23	2.31284	0.014571
1235	P54823	P54823	Probable ATP-dependent RNA helicase DDX6	Ddx6	31.5134	31.5666	31.6976	31.6171	31.756	31.4249	30.0826	30.2795	30.4194	26	26	26	67.5	67.5	67.5	54.191	0	323.31	13433000000	323	4.35663	0.000494791
1236	Q3U5N4;P54923;Q9CTF5	Q3U5N4;P54923	[Protein ADP-ribosylarginine] hydrolase	Adprh	29.566	29.488	29.4066	29.1305	29.2778	28.7026	29.9107	29.8088	29.7234	13	13	13	45	45	45	40.068	0	146.3	4087300000	128	2.19141	0.0180263
1237	Q3UFS5;P55065;A2A5K2;Q4FJT5;Q3UE59;A2A5K3;A2A5K4	Q3UFS5;P55065;A2A5K2;Q4FJT5;Q3UE59	Phospholipid transfer protein	Pltp	27.2082	26.8027	26.9644	26.0812	25.2916	26.1984	27.1497	26.8675	27.3232	8	8	8	19.7	19.7	19.7	54.452	0	32.482	686450000	40	2.16388	0.0189946
1238	P55066	P55066	Neurocan core protein	Ncan	29.7334	29.5837	29.4615	30.6458	30.7078	30.2863	28.572	28.1176	28.6883	29	29	29	26.5	26.5	26.5	137.2	0	119.15	5648900000	193	3.98574	0.000888894
1239	Q3U645;P55096;Q9DBZ6;Q3UNS0;Q91VT3	Q3U645;P55096;Q9DBZ6;Q3UNS0;Q91VT3	ATP-binding cassette sub-family D member 3	Abcd3	29.5231	29.4489	29.3219	29.6571	29.207	28.8452	30.2705	30.0392	29.9211	23	23	23	41.4	41.4	41.4	75.375	0	147.58	4609600000	178	1.73923	0.0399628
1240	P55144-3;P55144;P55144-2;Q62121	P55144-3;P55144;P55144-2;Q62121	Tyrosine-protein kinase receptor TYRO3;Receptor protein-tyrosine kinase	Tyro3	24.0818	24.6638	24.6338	26.9245	26.3813	26.458	23.993	24.1174	22.9893	8	8	8	16.2	16.2	16.2	96.041	0	12.375	314430000	17	3.30777	0.00266107
1241	P55200-2;P55200;D3Z5H5;S4R2S5;Q5DTR3;S4R199	P55200-2;P55200;D3Z5H5	Histone-lysine N-methyltransferase 2A;MLL cleavage product N320;MLL cleavage product C180	Kmt2a	24.7787	24.8779	25.3412	25.878	25.8491	25.6328	24.298	23.3888	24.1208	12	12	12	4.6	4.6	4.6	429.36	0	15.973	226850000	20	2.80386	0.00617594
1242	P55264;Q8BMC5;Q8BWS6;Q3TZR1;Q99PB8	P55264;Q8BMC5	Adenosine kinase	Adk	31.3443	31.4268	31.2632	30.5758	30.9791	30.7993	31.1898	31.0465	31.1637	21	21	2	61.2	61.2	11.6	40.148	0	246.72	10844000000	255	2.22043	0.0171173
1243	P55937-1;P55937;E9QP99;Q3UZV1	P55937-1;P55937;E9QP99;Q3UZV1	Golgin subfamily A member 3	Golga3	27.835	27.9847	28.4502	27.4023	27.6305	27.5042	27.5462	27.5837	27.4845	23	23	23	22.7	22.7	22.7	162.82	0	92.127	1321000000	81	1.70291	0.0425925
1244	P56183-2;P56183-3;P56183;Q05CN2;Q05DT3	P56183-2;P56183-3;P56183;Q05CN2	Ribosomal RNA processing protein 1 homolog A	Rrp1	26.599	27.0598	26.874	27.6165	27.2977	27.7804	23.1986	25.5079	23.6013	5	5	5	15.8	15.8	15.8	50.012	0	33.785	591470000	15	2.55755	0.00957794
1245	Q3ULK1;P56371;B2RRN5	Q3ULK1;P56371;B2RRN5	Ras-related protein Rab-4A	Rab4a	30.1184	30.231	30.0778	28.8848	28.7946	29.2782	29.9415	30.3328	30.2234	12	12	10	70.2	70.2	63.8	24.336	0	184.24	4655100000	159	3.34819	0.002501
1246	P56376;E9QJT5;Q8BMV3	P56376;E9QJT5	Acylphosphatase-1;Acylphosphatase	Acyp1	31.1016	31.0461	31.0238	30.5681	30.4651	30.329	31.2127	31.3537	31.1314	7	7	1	72.7	72.7	16.2	11.241	0	93.713	8930300000	127	3.79936	0.00119288
1247	Q792A4;P56392	Q792A4;P56392	Cytochrome c oxidase subunit 7A1, mitochondrial	Cox7a1	28.9474	28.6519	28.2003	26.752	27.3749	26.2111	28.0633	27.3935	27.6842	2	2	2	28.8	28.8	28.8	8.9863	0.00015323	4.9037	1207500000	44	2.14517	0.0196728
1248	P56480	P56480	ATP synthase subunit beta, mitochondrial	Atp5b	37.3537	37.4413	37.3726	37.5876	37.6146	37.8848	37.1235	37.0137	37.1242	35	35	35	76.9	76.9	76.9	56.3	0	323.31	1099500000000	7961	2.91534	0.00512227
1249	Q4FJL8;P56528;Q3UCS6;Q76N18	Q4FJL8;P56528;Q3UCS6	ADP-ribosyl cyclase/cyclic ADP-ribose hydrolase 1	Cd38	30.0304	29.9676	30.1038	31.0935	31.0209	31.0867	27.8498	27.9364	27.7831	13	13	13	49.7	49.7	49.7	34.407	0	203.71	6863800000	157	8.46642	5.59107e-06
1250	Q8C7W8;Q8C3T7;Q543U3;P56564;Q99NG1;D3YY51	Q8C7W8;Q8C3T7;Q543U3;P56564	Amino acid transporter;Excitatory amino acid transporter 1	Slc1a3	35.7271	35.8963	35.8952	34.8414	34.4616	34.6221	36.2066	36.5145	36.649	15	15	13	30.8	30.8	26.3	59.592	0	323.31	344100000000	2741	4.30679	0.000533867
1251	Q8CFQ9;Q564D0;Q3USY4;P56959;Q3UK30;G3UXT7;G3UZD2;Q91VQ2	Q8CFQ9;Q564D0;Q3USY4;P56959;Q3UK30;G3UXT7	RNA-binding protein FUS	Fus	31.8184	31.4294	31.4431	32.4491	32.2824	32.3695	29.8994	29.9083	29.9255	15	15	13	28.2	28.2	28.2	52.601	0	323.31	24623000000	408	5.79166	6.77945e-05
1252	Q8R2R0;Q3UNK6;P56960;Q8K366;F6VYQ6;Q9CYJ3;Q3TRD0;Q99KY7;Q9CVF6	Q8R2R0;Q3UNK6;P56960;Q8K366;F6VYQ6;Q9CYJ3;Q3TRD0	Exosome component 10	Exosc10	26.0061	26.2275	26.4567	27.4944	27.5561	26.9855	25.6667	24.6887	23.9445	16	16	16	25.6	25.6	25.6	100.91	0	28.08	529050000	39	2.46002	0.011354
1253	P57722-2;G3UYM5	P57722-2	Poly(rC)-binding protein 3	Pcbp3	30.8574	31.0071	30.716	30.6115	30.5536	30.7159	28.1638	28.5326	27.9351	16	11	1	74.6	57	7.8	39.166	0	90.804	4987200000	108	5.22883	0.000137544
1254	P57759;A8C1V9;F8WJI4;F8WIM7;D6RG87	P57759	Endoplasmic reticulum resident protein 29	Erp29	31.5799	31.7382	31.2839	31.3067	31.36	31.0649	32.196	32.2825	32.2434	12	12	12	49.2	49.2	49.2	28.823	0	145.23	15734000000	279	3.11022	0.00370707
1255	P57776-3;E9PUM6;Q9CVV2	P57776-3	Elongation factor 1-delta	Eef1d	30.9233	31.5147	31.2263	30.7005	30.8045	30.9573	30.3714	30.4279	30.2733	14	14	0	31.7	31.7	0	72.931	0	323.31	10850000000	189	2.35272	0.0136291
1256	P57784;G5E883;Q8BSH5	P57784;G5E883;Q8BSH5	U2 small nuclear ribonucleoprotein A	Snrpa1	30.7003	30.4693	30.681	31.5611	31.5045	31.435	29.0409	29.238	29.1875	16	16	16	54.1	54.1	54.1	28.357	0	323.31	8151600000	184	6.41165	3.33821e-05
1257	Q8C7F9;Q8C6H4;Q542E4;Q3TWB8;P58021;E9PZ69	Q8C7F9;Q8C6H4;Q542E4;Q3TWB8;P58021;E9PZ69	Transmembrane 9 superfamily member 2	Tm9sf2	29.8394	29.5021	29.4579	30.1001	30.1459	30.3705	28.9582	29.1574	28.8249	14	14	14	25.7	25.7	25.7	75.357	0	214.83	4016300000	93	3.3594	0.00246034
1258	Q3U405;P58069;D3YZE9	Q3U405;P58069;D3YZE9	Ras GTPase-activating protein 2	Rasa2	27.7325	27.596	27.2627	25.8267	25.8427	26.4961	27.7245	27.7903	27.2429	15	13	13	19.5	17.9	17.9	96.399	0	15.675	850290000	34	2.81878	0.00602892
1259	P58158;Q3UN75;Q3UJY2;D4Q8F9;Q3USF3	P58158;Q3UN75;Q3UJY2;D4Q8F9;Q3USF3	Galactosylgalactosylxylosylprotein 3-beta-glucuronosyltransferase 3	B3gat3	27.6811	28.0233	28.1442	28.1226	28.2511	27.9486	26.1337	26.246	26.1609	7	7	7	27.2	27.2	27.2	37.066	0	39.69	922620000	31	4.86343	0.000224682
1260	Q8BW59;P58196;Q8BV91;Q8BZC5	Q8BW59;P58196	Phospholipid scramblase 4	Plscr4	24.9263	24.8324	25.4166	24.3285	23.2078	24.336	26.4369	25.3604	25.7672	3	3	3	15.7	15.7	15.7	36.482	0	7.0451	160110000	16	1.91243	0.0296389
1261	Q3UDC8;P58252;Q8BMA8;Q3UZ14;Q3UMI7;Q3TX47;Q3TK17;Q6P9L9;Q3UBL9;Q3TWX1;Q8C153;Q3TW58;Q3TSK4;Q3TPG2;Q99LT6;Q61509;O89069;O89070	Q3UDC8;P58252;Q8BMA8;Q3UZ14;Q3UMI7;Q3TX47;Q3TK17;Q6P9L9;Q3UBL9;Q3TWX1;Q8C153;Q3TW58;Q3TSK4	Elongation factor 2	Eef2	34.2243	34.0583	33.9974	33.5597	33.6793	33.7199	34.1253	33.9824	33.8871	56	56	2	71.4	71.4	1.6	95.267	0	323.31	85411000000	1489	2.24203	0.0165022
1262	P58281-2;P58281;H7BX01;Q80TX7;E0CXD1;Q8BK99;F6U775	P58281-2;P58281;H7BX01;Q80TX7;E0CXD1	Dynamin-like 120 kDa protein, mitochondrial;Dynamin-like 120 kDa protein, form S1	Opa1;mKIAA0567	32.8364	32.4794	32.6382	33.4205	33.4096	33.2633	32.938	33.0305	32.9546	63	63	62	64.2	64.2	63.5	115.59	0	323.31	56219000000	1036	3.01045	0.00438
1263	P58501;F6YY19;P58501-2	P58501	PAX3- and PAX7-binding protein 1	Paxbp1	26.5394	27.0219	26.6512	28.3246	27.7913	27.2934	25.7137	25.2107	24.4046	16	16	16	21.5	21.5	21.5	104.83	0	42.563	737330000	50	2.74271	0.00692268
1264	Q8CHC1;P58545;Q3TSN9	Q8CHC1;P58545;Q3TSN9	BTB/POZ domain-containing protein 3	Btbd3	23.4996	23.314	24.7324	25.7341	26.0744	26.1059	23.5352	23.1343	24.0315	4	4	4	11	11	11	60.688	0.00030107	4.4824	109370000	9	2.56827	0.00940412
1265	P58742;Q8R3F7;Q3TEP0;Q8BU75	P58742;Q8R3F7;Q3TEP0	Aladin	Aaas	28.8803	28.9872	29.0505	29.2644	29.1045	29.4288	28.6452	28.9486	28.4872	15	15	15	44.9	44.9	44.9	59.43	0	112.86	3213300000	78	1.72923	0.0407303
1266	P59016;Q8C076;S4R1H4;S4R227	P59016;Q8C076	Vacuolar protein sorting-associated protein 33B	Vps33b	29.1037	28.8897	29.3846	28.885	28.8163	28.9708	29.4949	29.6561	29.4484	31	31	31	54.3	54.3	54.3	70.525	0	182.7	3503500000	164	2.09383	0.0214917
1267	P59108;Q3TVB2;Q8QZU9	P59108;Q3TVB2	Copine-2	Cpne2	29.203	29.3412	28.9573	27.9168	27.6361	27.9139	30.3222	30.0083	30.0736	16	15	15	38.1	36.5	36.5	61.035	0	137.47	4192200000	110	4.96945	0.000190326
1268	Q542C3;P59114;Q3UC00;Q8BY58	Q542C3;P59114	Phosphorylated CTD-interacting factor 1	Pcif1	29.6232	29.3706	29.4547	30.1482	30.0633	30.1168	23.0748	25.44	25.544	23	23	23	43.2	43.2	43.2	80.504	0	82.751	3227200000	116	3.4762	0.00201345
1269	Q7TT04;Q3UJY4;P59235;Q3URN3;Q921S9;Q8BT98	Q7TT04;Q3UJY4;P59235;Q3URN3	Nucleoporin Nup43	Nup43	26.7362	27.4392	26.7839	28.0096	27.5978	28.3023	25.0579	25.7879	26.0017	8	8	8	31.5	31.5	31.5	41.32	0	33.777	693770000	35	2.86209	0.00559247
1270	P59268	P59268	Palmitoyltransferase ZDHHC9	Zdhhc9	24.1198	24.2453	23.8372	25.5314	25.3759	25.2158	24.15	23.9445	23.5265	3	3	3	10.7	10.7	10.7	40.939	0.00015406	5.0162	136440000	8	3.32055	0.00260981
1271	Q3TQR3;P59325;Q05CM5;Q8BVV6;Q05CY6;Q3TT65;Q6PHA6;Q05C65;Q3TKY2;Q05CH7	Q3TQR3;P59325;Q05CM5;Q8BVV6;Q05CY6;Q3TT65;Q6PHA6;Q05C65;Q3TKY2;Q05CH7	Eukaryotic translation initiation factor 5	Eif5	29.3169	29.1966	29.3581	29.0943	29.1015	29.0336	29.8305	29.5617	29.6466	12	12	12	27	27	27	48.968	0	37.581	3984400000	110	3.15632	0.003434
1272	P59708	P59708	Splicing factor 3B subunit 6	Sf3b6	27.8699	27.3102	28.4058	28.3707	28.0164	28.1877	26.1878	27.0072	26.4934	4	4	4	37.6	37.6	37.6	14.585	0	25.776	1726800000	47	2.20281	0.0177187
1273	P59764;B2RUG6;Q8BMP2;Q3US86;Q3TQD2;REV__D3Z660	P59764;B2RUG6;Q8BMP2	Dedicator of cytokinesis protein 4	Dock4	29.3758	29.2716	29.5682	29.3215	29.183	29.0945	29.5776	29.622	29.4994	56	56	53	37.8	37.8	36.8	226.55	0	206.92	4217300000	213	1.65438	0.0464695
1274	Q9D3C4;Q7TPD9;P59999;Q8BVW6;Q3TX55;E9PWA7	Q9D3C4;Q7TPD9;P59999;Q8BVW6	Actin-related protein 2/3 complex subunit 4	Arpc4	32.4192	32.4252	32.5144	31.802	31.9984	32.1872	32.8845	32.4848	33.0383	11	11	11	61.3	61.3	61.3	19.653	0	323.31	27374000000	454	2.10684	0.0210634
1275	Q3UJN2;Q3U1C2;P60122;D3YW60;Q05CB6	Q3UJN2;Q3U1C2;P60122	RuvB-like 1	Ruvbl1	30.5566	30.6106	30.7368	31.2877	30.7667	30.9227	30.4692	29.8552	30.3174	24	24	24	57.2	57.2	57.2	50.213	0	231.55	10405000000	281	1.63137	0.0483323
1276	Q3UYM8;P60202;Q62079;P60202-2	Q3UYM8;P60202;Q62079;P60202-2	Myelin proteolipid protein	Plp1	35.7328	35.9337	35.9588	36.9905	36.7772	37.2214	33.4977	33.1438	33.1068	14	14	14	37.5	37.5	37.5	30.077	0	323.31	540890000000	1984	6.00929	5.43006e-05
1277	Q3UIG0;P60229;Q9CT23;Q6LCK2	Q3UIG0;P60229;Q9CT23	Eukaryotic translation initiation factor 3 subunit E	Eif3e	30.3758	30.1281	29.8932	30.2968	30.1938	30.1734	29.4023	29.5943	29.4367	24	24	24	58	58	58	52.22	0	120.89	6075300000	181	2.67108	0.00782535
1278	P60335	P60335	Poly(rC)-binding protein 1	Pcbp1	32.8387	32.8092	32.6153	32.2449	32.5271	32.4158	32.3086	32.1821	32.2283	18	14	14	84.8	73.9	73.9	37.497	0	323.31	25790000000	370	2.4095	0.012425
1279	P60487;Q6IS27;Q5U5Y4	P60487;Q6IS27	Pyridoxal phosphate phosphatase	Pdxp	32.5535	32.6908	32.4303	31.3708	31.6461	31.6994	32.6282	32.2926	32.5958	18	18	18	79.8	79.8	79.8	31.512	0	323.31	22657000000	381	3.26054	0.0028651
1280	P60521	P60521	Gamma-aminobutyric acid receptor-associated protein-like 2	Gabarapl2	30.4044	30.3487	29.8083	29.2527	29.5799	29.5471	30.6104	30.5341	29.9916	9	9	7	47.9	47.9	47.9	13.667	0	232.67	7019300000	153	1.72806	0.0407995
1281	P60603	P60603	Reactive oxygen species modulator 1	Romo1	29.3173	29.3723	29.5708	28.3996	29.1001	28.7059	29.3763	29.696	29.8995	3	3	3	32.9	32.9	32.9	8.1828	0	97.918	3136500000	56	1.88969	0.0307655
1282	Q3UIS6;Q569V4;Q3UBK1;P60762-2;P60762;Q3U5J6;Q5DTS9	Q3UIS6;Q569V4;Q3UBK1;P60762-2;P60762;Q3U5J6;Q5DTS9	Mortality factor 4-like protein 1	Morf4l1	27.4324	27.3231	28.3808	28.1862	28.5365	28.083	26.1275	26.0431	25.904	11	11	9	50.6	50.6	42	36.238	0	31.513	1068300000	35	3.12983	0.00358535
1283	P60824;K4DI65;D3YU80	P60824;K4DI65;D3YU80	Cold-inducible RNA-binding protein	Cirbp	29.5927	29.7898	29.7722	30.6485	31.0167	30.8674	28.2818	28.3319	28.3613	8	8	8	48.3	48.3	48.3	18.607	0	92.627	5097200000	92	6.01209	5.44126e-05
1284	P60840-2;P60840;P60840-3	P60840-2;P60840	Alpha-endosulfine	Ensa	27.5649	27.5331	27.5384	26.7192	26.6842	26.5728	27.2804	27.1735	27.6407	7	7	6	46.2	46.2	36.8	12.921	0	13.346	908490000	45	3.1212	0.00363314
1285	Q4FZL1;Q5F2A7;P60843;Q3UXC2;Q3TGK7;Q3TFG3;Q3TLL6;Q3U8I0;Q78WR5;Q3TSJ4;Q99LR0	Q4FZL1;Q5F2A7;P60843;Q3UXC2;Q3TGK7;Q3TFG3;Q3TLL6;Q3U8I0;Q78WR5	Eukaryotic initiation factor 4A-I	Eif4a1	32.9331	32.953	32.6996	32.2575	32.3535	32.2924	32.4248	32.1908	32.2802	30	25	15	67.7	61.5	37.8	46.022	0	323.31	29275000000	532	2.96478	0.00473901
1286	P60879	P60879	Synaptosomal-associated protein 25	Snap25	33.8252	33.8372	33.425	33.6525	33.4135	33.2795	34.1895	34.1615	33.9112	25	25	7	81.1	81.1	23.8	23.315	0	323.31	109220000000	1252	1.71374	0.0418601
1287	P60882	P60882	Multiple epidermal growth factor-like domains protein 8	Megf8	25.8847	26.1776	26.2522	25.5778	25.674	26.0515	26.4603	26.4145	26.3889	14	14	14	8.5	8.5	8.5	297.48	0	58.889	347520000	40	1.85382	0.0327927
1288	Q4FJL0;P61027;Q3U621	Q4FJL0;P61027;Q3U621	Ras-related protein Rab-10	Rab10	32.363	32.1557	32.1852	31.7427	32.1249	32.1052	32.7522	32.8328	32.938	16	15	13	68.5	63	56.5	22.541	0	298	28211000000	349	2.93411	0.0049891
1289	Q6ZWQ6;P61087;Q3TL77;Q3V3R8;D3Z4U3;F8WIC2	Q6ZWQ6;P61087;Q3TL77;Q3V3R8;D3Z4U3	Ubiquitin-conjugating enzyme E2 K	Ube2k	29.7559	29.684	29.8784	29.1293	29.0866	29.1128	29.6488	29.8871	29.9512	11	11	11	68.5	68.5	68.5	22.406	0	127.64	4236400000	109	3.4864	0.00198315
1290	Q5SW83;P61161;Q8BMA4	Q5SW83;P61161;Q8BMA4	Actin-related protein 2	Actr2	32.6359	32.3508	32.2623	31.4823	31.3009	31.5317	32.7412	32.9241	32.51	22	22	22	57.1	57.1	57.1	44.76	0	323.31	31451000000	649	3.53791	0.00182228
1291	Q810L2;P61208;Q1LZJ1;Q3TE09;Q8BV33	Q810L2;P61208;Q1LZJ1;Q3TE09;Q8BV33	ADP-ribosylation factor-like protein 4C	Arl4c	23.6937	23.6813	23.824	24.3191	24.753	25.0575	25.708	25.7288	25.8249	3	3	3	15.6	15.6	15.6	28.798	0	6.6176	167930000	7	4.01108	0.000851942
1292	Q14AC7;P61211;F8WIB1;Q9D7H9;Q3TIR2;Q4V9U3;E9Q006	Q14AC7;P61211;F8WIB1;Q9D7H9;Q3TIR2;Q4V9U3	ADP-ribosylation factor-like protein 1	Arl1	29.3224	29.5727	29.4692	29.3403	29.3779	29.2035	28.7495	28.9401	29.0711	10	10	10	74	74	74	20.411	0	85.51	3057200000	119	2.22959	0.0168333
1293	Q3V1V7;P61215;Q6NZJ2;E9Q2V1;Q3TRQ4;Q9CZQ3;Q8BZD6	Q3V1V7;P61215;Q6NZJ2;E9Q2V1	Carbonic anhydrase-related protein 10	Car10;Ca10	26.374	26.5105	26.5444	25.6695	25.6217	25.3534	28.1559	27.9436	27.8758	6	6	6	24.1	24.1	24.1	37.562	0	75.711	919150000	30	5.69332	7.32794e-05
1294	Q4FZH2;P61255;B1ARA3;B1ARA5	Q4FZH2;P61255;B1ARA3;B1ARA5	60S ribosomal protein L26	Rpl26	30.7965	30.2877	30.4273	30.6155	30.7259	30.9035	29.913	29.6802	29.1951	10	10	1	49	49	6.2	17.258	0	75.571	8164100000	228	2.31871	0.0144081
1295	P61264	P61264	Syntaxin-1B	Stx1b	34.4146	34.2217	34.2759	33.846	33.7841	33.6034	34.9133	34.8353	34.4987	22	22	20	63.2	63.2	58.7	33.244	0	323.31	152480000000	1323	3.15081	0.00346223
1296	Q4FK54;P61290;A2A4J1;A2A4J3;Q99K09	Q4FK54;P61290;A2A4J1	Proteasome activator complex subunit 3	Psme3	28.0199	27.7179	28.1424	27.724	27.5198	27.9691	26.1499	25.9759	26.6338	5	5	5	24.4	24.4	24.4	29.506	0	68.282	1247600000	37	3.34589	0.00250579
1297	Q0PD53;P61294	Q0PD53;P61294	Ras-related protein Rab-6B	Rab6b	30.0864	29.9141	29.4267	29.5249	29.9791	29.729	30.4607	30.85	30.7261	15	6	6	71.6	29.3	29.3	23.461	0	177.5	6942600000	92	2.07632	0.0221323
1298	P61327	P61327	Protein mago nashi homolog	Magoh	29.6993	29.0777	29.2473	30.351	29.9064	29.9886	27.068	27.7722	26.8375	5	5	1	39	39	5.5	17.163	0	79.453	3646600000	69	3.73872	0.00132743
1299	P61329;P61329-2;C6EQH1;O35340;Q3UFZ2	P61329;P61329-2;C6EQH1	Fibroblast growth factor 12	Fgf12	28.4828	28.4372	28.9924	27.8423	28.399	28.2835	29.0367	29.2828	29.5323	11	11	8	45.7	45.7	35	27.399	0	83.542	2468500000	116	2.05323	0.0230624
1300	Q5BLJ9;P61358;Q9CSM4;A2A4Q0	Q5BLJ9;P61358;Q9CSM4;A2A4Q0	60S ribosomal protein L27	Rpl27	30.5644	30.4286	30.2594	30.8339	30.6183	30.2937	29.3154	29.2497	29.3089	6	6	6	43.4	43.4	43.4	15.798	0	82.349	7220600000	151	3.61369	0.00161098
1301	Q544V2;P61793-2;P61793;A2AMJ0;A2AMI9	Q544V2;P61793-2;P61793	Lysophosphatidic acid receptor 1	Lpar1	29.4681	29.4013	29.7601	28.6575	28.5916	28.816	29.7678	29.5468	29.8836	7	7	7	15.1	15.1	15.1	41.119	0	74.103	4123100000	58	3.31698	0.00262258
1302	P61922;Q3V1S0;P61922-2;F7C9G3;Q3TUE8;Q3U0M2;F6RN86	P61922;Q3V1S0;P61922-2	4-aminobutyrate aminotransferase, mitochondrial	Abat	34.5615	34.3143	34.4188	35.0279	34.8432	34.9334	34.2371	34.3828	34.331	37	37	37	80	80	80	56.451	0	323.31	161340000000	1734	3.24064	0.00296398
1303	P61965;Q3UNQ3;F6Q3W0	P61965;Q3UNQ3;F6Q3W0	WD repeat-containing protein 5	Wdr5	29.0838	28.9966	29.0483	29.1731	29.6224	29.2267	26.6074	26.5485	27.4039	15	15	15	63.5	63.5	63.5	36.588	0	110.61	2594100000	105	3.90705	0.00100224
1304	Q5FWJ5;P61979-2;Q3TUA1;P61979;Q3TJ38;H3BLL4;D3YWG1;H3BK96	Q5FWJ5;P61979-2;Q3TUA1;P61979;Q3TJ38;H3BLL4;D3YWG1;H3BK96	Heterogeneous nuclear ribonucleoprotein K	Hnrnpk;Gm7964	30.1187	31.6289	31.5663	33.2505	32.9131	33.1354	28.8041	29.1574	28.8521	33	2	0	68.5	8	0	51.028	0	37.334	18973000000	49	3.71603	0.00136973
1305	Q3UP01;P62046;Q3UWY4;Q3TSE7;Q3TU90	Q3UP01;P62046;Q3UWY4	Leucine-rich repeat and calponin homology domain-containing protein 1	Lrch1	25.1787	26.3172	25.7836	25.5626	25.3763	25.2722	26.7953	26.8718	26.8162	8	8	3	16.2	16.2	6.5	83.137	0	14.748	431250000	31	2.27642	0.0154841
1306	P62069;D3YVU0;D3YVJ5	P62069;D3YVU0	Ubiquitin carboxyl-terminal hydrolase 46	Usp46	28.0591	28.5342	28.141	27.8761	27.6451	28.0144	28.5883	28.314	28.5801	10	10	5	33.9	33.9	16.4	42.442	0	55.375	1626700000	78	1.66883	0.0452821
1307	P62071;Q9CTF6	P62071;Q9CTF6	Ras-related protein R-Ras2	Rras2	27.4517	28.0269	27.9107	29.8591	29.0786	28.9097	28.0209	28.0877	28.1086	11	11	9	53.9	53.9	40.7	23.399	0	93.725	2608800000	65	2.40593	0.0125092
1308	P62075	P62075	Mitochondrial import inner membrane translocase subunit Tim13	Timm13	30.4303	30.4816	30.0816	29.9928	30.113	30.1802	31.4139	30.8291	30.6909	7	7	7	78.9	78.9	78.9	10.458	0	144.31	6896800000	94	1.83057	0.0341198
1309	Q4FZE6;P62082;F6SVV1	Q4FZE6;P62082;F6SVV1	40S ribosomal protein S7	Rps7;Gm9493	31.2118	31.5805	31.1677	31.558	31.5137	31.8505	31.0661	30.9028	30.3369	13	13	13	68.6	68.6	68.6	22.127	0	56.902	13737000000	207	1.64102	0.0475101
1310	Q542I9;P62192	Q542I9;P62192	26S protease regulatory subunit 4	Psmc1	30.761	30.9246	31.1237	29.7335	30.3467	30.2939	30.483	30.8566	30.875	21	21	21	56.4	56.4	56.4	49.184	0	251.39	9213000000	235	1.71215	0.0419437
1311	Q497E9;P62242;Q5M9L9;Q3UJU6;Q9CQW4;Q3UA25;Q9CRJ5	Q497E9;P62242;Q5M9L9;Q3UJU6;Q9CQW4;Q3UA25;Q9CRJ5	40S ribosomal protein S8	Rps8	32.3479	32.3727	31.9855	32.2401	32.4025	32.2922	31.2131	31.3411	31.3005	12	12	12	55.8	55.8	55.8	24.205	0	323.31	23880000000	350	3.75772	0.00128201
1312	Q5M9M4;P62245;F8WJ41;D3Z712;D3YVB4	Q5M9M4;P62245;F8WJ41	40S ribosomal protein S15a	Rps15a	31.408	30.7469	30.6208	31.179	30.8898	30.8693	30.2511	29.7553	29.9912	10	10	10	65.4	65.4	65.4	14.839	0	119.88	9405500000	230	1.92116	0.0291569
1313	Q5SS40;P62259;Q8BPH1;D6REF3;F6WA09;Q3V453	Q5SS40;P62259;Q8BPH1;D6REF3	14-3-3 protein epsilon	Ywhae	35.0819	34.9179	34.845	34.5128	34.738	34.5177	35.396	35.2397	35.2646	28	28	25	77.6	77.6	74.5	29.174	0	323.31	225770000000	2591	3.11058	0.00370673
1314	Q9CWI9;Q9CZI5;P62267;Q9CSN9;Q497E1	Q9CWI9;Q9CZI5;P62267;Q9CSN9;Q497E1	40S ribosomal protein S23	Rps23	31.046	30.9679	30.543	31.2476	31.4877	31.1435	29.7899	30.6256	30.4639	7	7	7	49	49	49	15.835	0	80.456	11498000000	147	1.63345	0.0481615
1315	Q561N5;P62270;Q3TW65;F6YVP7;S4R1N6	Q561N5;P62270;Q3TW65;F6YVP7;S4R1N6	40S ribosomal protein S18	Rps18;Gm10260	31.7544	31.8217	31.9124	31.5029	31.7962	31.8012	30.9445	30.8742	30.8197	15	15	15	66.4	66.4	66.4	17.718	0	280.29	15608000000	246	3.98093	0.000897611
1316	Q3UC02;Q9DB79;P62281;Q9D0P6;Q9CW75	Q3UC02;Q9DB79;P62281;Q9D0P6	40S ribosomal protein S11	Rps11	32.3357	32.1105	31.9423	32.0123	31.9763	31.7533	31.2078	31.283	30.7978	15	15	15	62.7	62.7	62.7	18.431	0	150.38	19686000000	325	2.71423	0.00726438
1317	Q921R2;Q5BLJ7;P62301	Q921R2;Q5BLJ7;P62301	40S ribosomal protein S13	Rps13	31.1138	31.0774	31.0557	31.2559	31.3007	31.3425	30.3149	30.0347	30.1744	10	10	10	58.6	58.6	58.6	16.142	0	72.57	11502000000	207	5.06421	0.000169052
1318	P62305;E9Q4F4;E9Q0W8	P62305;E9Q4F4;E9Q0W8	Small nuclear ribonucleoprotein E	Snrpe	29.7293	29.1079	28.9951	30.4119	30.344	30.2135	28.1645	28.7075	28.0793	4	4	4	65.2	65.2	65.2	10.803	0	77.264	5126800000	185	3.20304	0.00316467
1319	Q497K3;P62307;Q3UX80;Q6NZQ3	Q497K3;P62307;Q3UX80;Q6NZQ3	Small nuclear ribonucleoprotein F	Snrpf	29.2162	28.8664	29.0049	28.7659	28.4988	29.1522	26.5252	27.0966	27.1204	6	6	6	48.8	48.8	48.8	9.7251	0	18.841	1934400000	61	3.69448	0.00141779
1320	Q3V424;P62309	Q3V424;P62309	Small nuclear ribonucleoprotein G	Snrpg	29.3466	28.3316	28.5254	29.8108	30.1209	29.7519	27.8399	27.3043	28.0493	3	3	3	31.2	31.2	31.2	7.1013	0	13.744	2873000000	72	2.7678	0.00660741
1321	Q542U7;P62313	Q542U7;P62313	U6 snRNA-associated Sm-like protein LSm6	Lsm6	27.8368	28.189	27.7739	27.584	27.7214	27.9942	27.0069	27.1732	27.096	6	6	6	56.2	56.2	56.2	9.1275	0	8.7258	1213500000	46	2.52006	0.0102255
1322	P62315	P62315	Small nuclear ribonucleoprotein Sm D1	Snrpd1	31.7726	31.5343	31.4523	32.6402	32.1586	32.6398	30.3896	29.9582	30.3788	5	5	5	54.6	54.6	54.6	13.281	0	323.31	17808000000	163	4.1406	0.000693354
1323	Q14AF6;P62317;D3Z5N9	Q14AF6;P62317;D3Z5N9	Small nuclear ribonucleoprotein Sm D2	Snrpd2;Gm5449	31.6006	31.261	31.391	32.3648	32.1879	32.1359	29.7595	29.5626	29.8378	10	10	10	67.8	67.8	67.8	13.527	0	323.31	19336000000	256	5.67705	7.44314e-05
1324	Q91VM2;P62320	Q91VM2;P62320	Small nuclear ribonucleoprotein Sm D3	Snrpd3	30.807	30.896	30.2431	32.1485	32.0381	31.7406	29.2411	29.4635	28.9757	5	5	5	53.2	53.2	53.2	13.985	0	171.12	15341000000	259	4.22982	0.000596928
1325	Q3U0D7;P62331	Q3U0D7;P62331	ADP-ribosylation factor 6	Arf6	31.1128	31.1753	31.1361	30.2542	31.0426	30.9096	31.803	31.3963	31.5931	6	5	5	52	48.6	48.6	20.082	0	124.88	10513000000	176	1.6433	0.0473061
1326	P62340;Q8K073	P62340;Q8K073	TATA box-binding protein-like protein 1	Tbpl1	27.2656	27.2699	27.6829	26.7023	27.4981	27.8511	21.3645	22.3269	24.3306	6	6	5	36	36	32.8	20.886	0	39.689	434830000	25	2.89378	0.00530447
1327	Q6AXH6;Q6AXD2;P62484	Q6AXH6;Q6AXD2;P62484	Abl interactor 2	Abi2	28.7479	28.9754	28.9827	28.1436	28.447	28.2222	29.2111	29.4464	29.3882	16	10	10	31.7	23.8	23.8	52.839	0	107.4	2905100000	101	3.63346	0.0015614
1328	P62488	P62488	DNA-directed RNA polymerase II subunit RPB7	Polr2g	26.5452	27.2892	26.8424	28.3108	27.9609	27.8908	25.8495	23.0272	25.6088	7	7	7	55.2	55.2	55.2	19.294	0	43.144	938510000	26	1.81726	0.0349105
1329	Q545X8;P62702;Q545F8;Q3UXQ6;V9GWY0	Q545X8;P62702;Q545F8;Q3UXQ6;V9GWY0	40S ribosomal protein S4;40S ribosomal protein S4, X isoform	Rps4x;Gm15013	32.4297	32.292	31.8387	32.2169	32.3627	32.2818	31.2081	31.293	30.7528	22	22	9	66.2	66.2	26.2	29.597	0	323.31	22777000000	445	2.74208	0.00692859
1330	P62715;Q8VED4;Q8BN07	P62715;Q8VED4;Q8BN07	Serine/threonine-protein phosphatase 2A catalytic subunit beta isoform;Serine/threonine-protein phosphatase	Ppp2cb	32.2878	32.042	32.2852	31.79	31.8984	31.8044	32.0227	31.9729	32.0628	16	16	2	68.3	68.3	6.8	35.575	0	323.31	22829000000	482	2.12969	0.0202675
1331	P62717;Q3THJ0;Q05CK2;F6YJW4;REV__Q8BPD3	P62717;Q3THJ0;Q05CK2	60S ribosomal protein L18a	Rpl18a	31.2409	31.1242	31.1035	30.6235	31.1405	30.8032	30.1131	30.5684	30.4867	13	13	13	55.7	55.7	55.7	20.732	0	53.311	9167400000	180	1.91822	0.0292899
1332	P62737;Q3UJ36;Q3U122;P63268;Q61852;D3YZY0;D3Z2K3;I6L9D2	P62737;Q3UJ36;Q3U122;P63268;Q61852;D3YZY0	Actin, aortic smooth muscle;Actin, gamma-enteric smooth muscle	Acta2;Actg2	28.0881	26.7842	24.4557	22.8494	24.2615	24.4104	30.3825	28.9182	27.6868	32	1	1	75.1	2.9	2.9	42.009	0	5.3252	1032900000	16	1.91567	0.0294294
1333	P62748	P62748	Hippocalcin-like protein 1	Hpcal1	33.0933	33.2576	33.3295	33.1691	33.0085	33.313	33.6845	33.7048	33.7344	18	18	8	85.5	85.5	43.5	22.338	0	323.31	70146000000	965	2.69438	0.00752198
1334	Q5BLK1;P62754;Q8BT09;Q3TL53	Q5BLK1;P62754;Q8BT09;Q3TL53	40S ribosomal protein S6	Rps6	30.9943	31.0558	30.5691	31.2245	31.3487	31.2761	29.803	30.4264	30.2234	14	14	14	42.2	42.2	42.2	28.68	0	107.41	10390000000	142	2.46344	0.0113157
1335	Q4W4C9;P62761;Q3TVC0	Q4W4C9;P62761;Q3TVC0	Visinin-like protein 1	Vsnl1	33.586	33.6819	33.405	34.0192	34.0274	34.1372	33.6723	33.7977	33.6345	23	23	2	93.2	93.2	9.4	22.142	0	323.31	90462000000	1071	2.61282	0.00869053
1336	P62814;B0LAC8	P62814	V-type proton ATPase subunit B, brain isoform	Atp6v1b2	34.5848	34.5768	34.6309	34.2555	34.4897	34.4702	34.8813	34.8313	35.0145	32	32	25	84	84	64.8	56.55	0	323.31	169220000000	2461	2.75132	0.00681461
1337	Q3UB66;Q0PD67;P62821;Q6ZPF0	Q3UB66;Q0PD67;P62821;Q6ZPF0	Ras-related protein Rab-1A	Rab1;Rab1A	33.2991	33.4229	33.0185	32.8352	32.7868	32.9884	33.438	33.4804	33.4578	16	16	1	79	79	5.9	22.678	0	219.55	67195000000	948	2.31151	0.0145956
1338	Q542T7;P62823;Q9CXS2;Q920F0	Q542T7;P62823;Q9CXS2	Ras-related protein Rab-3C	Rab3c	32.8297	32.7151	32.7739	30.3323	30.4513	30.1291	32.8982	32.7809	32.9555	14	14	2	57.7	57.7	7	25.872	0	215.62	31801000000	445	6.68884	2.48168e-05
1339	Q3ULW0;P62827;Q14AA6;A6H622;Q61820	Q3ULW0;P62827;Q14AA6	GTP-binding nuclear protein Ran	Ran;1700009N14Rik	33.1381	33.2128	33.2963	32.4068	32.7657	33.1472	32.1379	32.2997	32.6204	16	16	16	55.6	55.6	55.6	24.351	0	180.89	45894000000	434	1.71982	0.0414291
1340	P62830;A2A6F8	P62830	60S ribosomal protein L23	Rpl23	32.1571	32.3143	32.3193	32.1693	32.109	32.2996	31.0887	31.2981	31.3186	7	7	7	51.4	51.4	51.4	14.865	0	194.7	18757000000	184	4.42904	0.000444788
1341	P62835;Q3V3W9;C5H0E8;Q3U7U8;C5H0E9	P62835;Q3V3W9;C5H0E8;Q3U7U8;C5H0E9	Ras-related protein Rap-1A	Rap1a;Gm9392	31.8757	31.904	31.9613	32.5824	32.6278	32.7011	32.5446	32.4161	32.4234	16	16	6	80.4	80.4	33.7	20.987	0	323.31	24633000000	332	4.83656	0.000232048
1342	Q58EA6;P62852	Q58EA6;P62852	40S ribosomal protein S25	Rps25	31.8869	31.7526	31.6401	31.6249	31.5454	31.3223	31.1623	31.2342	30.6949	5	5	5	29.6	29.6	29.6	13.742	0	128.75	14893000000	187	1.88808	0.0308567
1343	P62869;A6PWE0;Q9D7T5	P62869	Transcription elongation factor B polypeptide 2	Tceb2	30.4233	30.3033	30.0832	29.5771	29.4232	29.7928	30.3721	30.099	29.8836	12	12	12	66.9	66.9	66.9	13.17	0	194.32	6549600000	137	1.80766	0.0354922
1344	Q3TQ70;P62874;Q3U1B1;H3BKR2;H3BLF7;Q61621	Q3TQ70;P62874;Q3U1B1;H3BKR2;H3BLF7	Guanine nucleotide-binding protein G(I)/G(S)/G(T) subunit beta-1	Gnb1	35.1382	35.0427	35.166	35.16	34.6436	34.9097	35.3472	35.4231	35.5869	18	18	11	71.5	71.5	41.2	37.377	0	323.31	242340000000	2266	1.69311	0.0433509
1345	Q497D7;Q58DZ3;P62889;Q5PR15	Q497D7;Q58DZ3;P62889;Q5PR15	60S ribosomal protein L30	Rpl30	31.4656	31.3619	31.4777	31.2969	31.0377	31.233	30.3706	30.2817	29.8031	9	9	9	70.2	70.2	70.2	12.656	0	152.13	13977000000	222	3.34738	0.00250358
1346	Q505A8;P62892	Q505A8;P62892	60S ribosomal protein L39	Rpl39	26.6891	26.2343	26.3746	26.3794	27.128	26.8136	23.8893	25.2423	25.4122	2	2	2	19.6	19.6	19.6	6.4066	0	19.549	384150000	23	1.97458	0.0265417
1347	Q9CY93;Q5M9K9;P62900;Q58DZ1	Q9CY93;Q5M9K9;P62900	60S ribosomal protein L31	Rpl31	30.3778	30.4056	30.079	30.4575	30.5838	30.4533	29.6694	28.5817	28.8917	9	9	9	53.6	53.6	53.6	14.411	0	49.115	7444000000	148	2.38384	0.0129479
1348	Q5YLW3;P62908;Q9D0A2;Q3UK56;Q9CZP6;Q3UCL7;D3YV43;O89068	Q5YLW3;P62908;Q9D0A2;Q3UK56;Q9CZP6;Q3UCL7;D3YV43;O89068	40S ribosomal protein S3	Rps3	32.74	32.5667	32.2486	32.7104	32.7051	32.6376	32.1433	32.0127	31.4831	22	22	22	81.5	81.5	81.5	26.674	0	323.31	34116000000	573	1.77697	0.0374644
1349	Q3UNY0;Q3ULN2;P62915;Q3UZJ3	Q3UNY0;Q3ULN2;P62915;Q3UZJ3	Transcription initiation factor IIB	Gtf2b	27.5905	27.607	26.4076	28.0145	27.5322	27.8548	24.7885	24.3592	24.7661	11	11	11	43	43	43	34.862	0	30.172	747960000	37	3.55451	0.00177784
1350	Q3UJS0;P62918;Q3THC7;Q9Z237	Q3UJS0;P62918;Q3THC7;Q9Z237	60S ribosomal protein L8	Rpl8	31.599	31.6933	31.5098	31.5698	31.8106	31.7643	30.6053	30.731	30.2482	16	16	16	61.9	61.9	61.9	28.066	0	292.07	14674000000	219	3.58734	0.00168618
1351	Q71V06;Q810K5;Q3UBT1;P62960;Q60951;A2BGG7;Q9Z2C8-2;Q8BRJ5;Q9CTL4	Q71V06;Q810K5;Q3UBT1;P62960;Q60951;A2BGG7	Nuclease-sensitive element-binding protein 1	Ybx1	27.8947	27.8422	27.8243	28.719	28.1631	28.3555	27.243	27.4241	27.3876	10	10	5	49.8	49.8	27.8	33.546	0	72.997	1990000000	39	3.04717	0.00411223
1352	Q642L7;P62983;A5JUZ1;E9Q9J0;Q8C2K3;E9Q5F6;Q922B0;Q5SX22;Q3TH47;Q78XY9;Q6NZC5;Q8R0Z9;Q922Z8;Q8VC46;P0CG49;P0CG50;Q3TWD1	Q642L7;P62983;A5JUZ1;E9Q9J0;Q8C2K3;E9Q5F6;Q922B0;Q5SX22;Q3TH47;Q78XY9;Q6NZC5;Q8R0Z9;Q922Z8;Q8VC46;P0CG49;P0CG50	Ubiquitin-40S ribosomal protein S27a;Ubiquitin;40S ribosomal protein S27a;Polyubiquitin-B;Ubiquitin;Polyubiquitin-C;Ubiquitin;Ubiquitin-related 1;Ubiquitin-related 2	Rps27a;Ubc;Uba52;Gm1821;Ubb	34.2718	34.669	34.6167	34.6635	34.5223	34.7394	33.4378	33.2273	33.6831	12	12	3	59.6	59.6	21.2	17.951	0	323.31	130300000000	1264	3.30642	0.00266277
1353	Q5SW18;P63005;Q3UH92;Q3UGR6;Q3TJG1;Q3UHM0;P63005-2;Q3TIK0;Q5SW16;Q3TUH5	Q5SW18;P63005;Q3UH92;Q3UGR6;Q3TJG1;Q3UHM0;P63005-2;Q3TIK0	Platelet-activating factor acetylhydrolase IB subunit alpha	Pafah1b1	31.7322	31.8458	31.9049	31.4007	31.6235	31.4259	32.2313	32.2979	32.2526	27	27	27	74.9	74.9	74.9	46.67	0	323.31	25805000000	488	3.91329	0.000990413
1354	Q0PD63;P63011;D3YZP5;Q05D37	Q0PD63;P63011	Ras-related protein Rab-3A	Rab3a	33.8995	33.9409	33.8615	33.4282	32.9967	33.3097	34.113	34.0611	34.3155	12	9	8	56.4	50	41.4	24.97	0	267.11	85691000000	795	3.08537	0.00385784
1355	Q8VDB7;Q8VDB3;P63015;P63015-2;Q8VHL9;A2A409;Q8VDB6;Q8VDB4;Q8VBY9;Q8VBX9;A2A412;P63015-3;Q8VHH9	Q8VDB7;Q8VDB3;P63015;P63015-2;Q8VHL9;A2A409;Q8VDB6;Q8VDB4	Paired box protein Pax-6	Pax-6;Pax6	26.4549	26.2383	26.9021	27.1163	27.5868	27.906	24.6897	25.364	24.9728	9	9	9	33.9	33.9	33.9	32.706	0	30.141	694020000	34	3.39609	0.00232294
1356	P63038;P63038-2;D3Z2F2;D3Z7J9	P63038	60 kDa heat shock protein, mitochondrial	Hspd1	34.4865	34.4658	34.3828	34.9594	34.9996	35.0942	34.5594	34.5088	34.6791	51	51	51	80.6	80.6	80.6	60.955	0	323.31	178180000000	2331	3.79144	0.00120653
1357	P63040;D3YZ72	P63040	Complexin-1	Cplx1	29.4972	29.6119	29.5883	30.5419	30.6777	30.4334	28.7177	28.9399	29.2113	10	6	6	79.1	54.5	54.5	15.122	0	189.08	7000100000	112	4.21185	0.000609868
1358	Q3UVC5;P63056-2;P63056;D3YTM3	Q3UVC5;P63056-2;P63056;D3YTM3	Noelin-3	Olfm3	27.3129	27.2651	27.2995	27.2138	27.1693	27.0691	28.8238	28.9289	28.7401	12	12	12	29.5	29.5	29.5	52.841	0	72.679	1466900000	59	6.72143	2.39079e-05
1359	Q8C446;P63080	Q8C446;P63080	Gamma-aminobutyric acid receptor subunit beta-3	Gabrb3	28.7448	29.0245	29.0346	29.8165	30.0659	29.7098	27.9018	28.2941	27.607	12	6	6	28.8	16.9	16.9	54.282	0	108.03	3067200000	104	3.65931	0.0014895
1360	P63085;Q3UF82;O35558;Q922X7;F6VEI7	P63085;Q3UF82;O35558	Mitogen-activated protein kinase 1;Mitogen-activated protein kinase	Mapk1;Erk2	32.7896	32.5086	32.7803	31.9342	32.282	32.1645	33.1519	33.0432	32.9545	25	25	20	68.2	68.2	59.2	41.275	0	323.31	34696000000	563	3.09617	0.00378481
1361	P63087-2;Q6ZWM8;Q3U7K1;P63087	P63087-2;Q6ZWM8;Q3U7K1;P63087	Serine/threonine-protein phosphatase PP1-gamma catalytic subunit;Serine/threonine-protein phosphatase	Ppp1cc	29.4355	29.894	29.4823	28.7258	28.9416	29.1121	29.1383	29.4058	29.1942	21	5	5	71.2	20.2	20.2	38.504	0	102.42	3852200000	55	1.75522	0.0388961
1362	P63101;Q3UA58;Q8BWN0;D3YXN6;D3YXF4;D3YW45	P63101	14-3-3 protein zeta/delta	Ywhaz	35.0763	35.1788	35.006	34.7857	34.714	34.739	35.4818	35.4495	35.4588	26	23	20	78.4	78.4	71.8	27.771	0	323.31	260660000000	1360	4.90509	0.000210464
1363	P63137-2;P63137;Q8CJ39;F6WUM4	P63137-2;P63137	Gamma-aminobutyric acid receptor subunit beta-2	Gabrb2	29.3736	29.9762	30.1025	30.8489	30.7057	30.9503	28.9678	29.5183	29.5419	13	7	7	28.5	15.4	15.4	54.633	0	207.58	7597700000	184	2.60826	0.00874416
1364	Q8C7C4;Q8BNM0;Q58EV5;Q497Z6;P63158;Q8BQ02;Q6P202;Q3UBK2;Q3UJK0;D3YZ18;D3YVC6;Q8CH24;Q80YZ1;Q7TPS2	Q8C7C4;Q8BNM0;Q58EV5;Q497Z6;P63158;Q8BQ02;Q6P202;Q3UBK2;Q3UJK0;D3YZ18	High mobility group protein B1	Hmgb1	33.8857	33.6928	33.7931	33.5637	33.5368	33.9501	30.8428	31.1006	30.6708	21	21	18	65.2	65.2	53.4	20.303	0	323.31	64088000000	701	5.6426	7.88708e-05
1365	P63166;Q8BT45	P63166	Small ubiquitin-related modifier 1	Sumo1	27.2139	27.2826	27.0223	26.8737	26.5632	27.1506	25.563	22.1874	23.343	4	4	4	43.6	43.6	43.6	11.557	0.00015265	4.8149	586400000	28	1.99967	0.0253914
1366	P63168;Q9D6F6;Q80ZS7	P63168;Q9D6F6	Dynein light chain 1, cytoplasmic	Dynll1	27.4998	26.9973	27.7886	28.6184	28.5714	28.4416	26.9012	27.3012	27.531	5	3	3	62.9	38.2	38.2	10.366	0	22.782	1523800000	28	2.43612	0.0118774
1367	P63213;REV__Q5U4C2;REV__Q80VM5;REV__Q9Z218;REV__E9PWX1	P63213	Guanine nucleotide-binding protein G(I)/G(S)/G(O) subunit gamma-2	Gng2	31.8455	31.9428	31.9892	31.2439	31.6671	31.3745	31.8241	32.3692	32.212	7	6	6	78.9	78.9	78.9	7.8501	0	205.89	27667000000	229	1.81121	0.0352642
1368	P63216	P63216	Guanine nucleotide-binding protein G(I)/G(S)/G(O) subunit gamma-3	Gng3	31.7881	31.8463	31.4773	30.4901	30.7502	30.39	31.711	31.9041	31.862	7	7	7	81.3	81.3	81.3	8.3047	0	323.31	17884000000	279	3.82517	0.00114109
1369	Q3ZAT1;P63250;Q8VHS3;Q8VHS4;B1AYE4	Q3ZAT1;P63250;Q8VHS3	G protein-activated inward rectifier potassium channel 1	Kcnj3;Kcnj1	27.8924	28.1537	28.272	29.1253	29.2241	28.9026	26.6216	26.9997	27.1366	10	10	9	31.3	31.3	28.7	56.573	0	135.73	2003900000	63	4.29028	0.000544648
1370	Q4KL81;P63260;Q3TSB7;Q3UD81;B1ATY1;G3UYG0	Q4KL81;P63260;Q3TSB7;Q3UD81	Actin, cytoplasmic 2;Actin, cytoplasmic 2, N-terminally processed	Actg1	37.1934	37.2012	37.4976	36.786	37.0081	37.1706	37.4306	37.5628	37.6834	35	35	0	74.1	74.1	0	41.792	0	323.31	1419600000000	8704	1.78581	0.0368866
1371	Q5M9L7;Q8BT90;P63276;Q3TK12	Q5M9L7;Q8BT90;P63276;Q3TK12	40S ribosomal protein S17	Rps17	30.7954	30.948	30.8287	30.6893	31.1325	31.1367	29.325	29.3362	30.0914	9	9	9	60	60	60	15.524	0	56.904	10169000000	160	2.67377	0.00780331
1372	P63280;Q8CFZ0;G3UYP0;G3UZL6;G3UWL6;G3UWJ1	P63280;Q8CFZ0;G3UYP0	SUMO-conjugating enzyme UBC9	Ube2i	30.3824	30.1713	29.9886	30.401	30.0883	30.4288	28.197	28.2327	28.4187	10	10	10	80.4	80.4	80.4	18.007	0	81.332	4158800000	98	4.94333	0.000199956
1373	Q3UN66;P63318;Q2NKI4;Q64493	Q3UN66;P63318;Q2NKI4	Protein kinase C;Protein kinase C gamma type	Prkcg	34.105	34.2086	34.0885	33.2139	33.3209	33.4078	34.7575	34.7453	34.8995	46	46	43	70.6	70.6	64.3	78.357	0	323.31	107070000000	1396	5.71169	7.26512e-05
1374	Q5M9K7;Q3U9P0;P63325;Q3UW83	Q5M9K7;Q3U9P0;P63325;Q3UW83	40S ribosomal protein S10	Rps10	31.0688	30.8617	30.928	30.9999	30.8327	30.6615	29.5234	29.8867	29.9292	9	9	9	51.5	51.5	51.5	18.916	0	227.08	9821800000	320	3.52294	0.00186293
1375	Q4VAG4;P67984	Q4VAG4;P67984	60S ribosomal protein L22	Rpl22	31.0054	31.485	31.2283	30.9386	30.8246	31.0454	30.8186	30.3749	30.169	4	4	4	43.8	43.8	43.8	14.759	0	85.843	9978800000	73	1.67399	0.0448915
1376	Q9CXK3;Q497E4;P68033;Q3UIJ3;Q3TG92;Q61275;Q61274;Q61273	Q9CXK3;Q497E4;P68033;Q3UIJ3;Q3TG92;Q61275	Actin, alpha cardiac muscle 1	Actc1	30.0268	30.1408	30.2239	26.9458	27.6748	26.7628	31.4233	31.5846	31.4269	32	11	0	75.1	44.6	0	41.946	0	323.31	8634100000	128	5.34015	0.000115934
1377	Q561N4;P68037;Q3TIH9;D3YZS3;Q3TW19	Q561N4;P68037;Q3TIH9;D3YZS3	Ubiquitin-conjugating enzyme E2 L3	Ube2l3	30.3393	31.0558	30.9244	30.557	30.4348	30.673	31.6932	31.5438	31.3012	10	10	10	69.5	69.5	69.5	17.861	0	123.89	9411200000	154	2.04424	0.0234416
1378	P68040	P68040	Guanine nucleotide-binding protein subunit beta-2-like 1;Guanine nucleotide-binding protein subunit beta-2-like 1, N-terminally processed	Gnb2l1	32.8719	32.8071	32.6959	32.9648	32.6737	32.6266	31.7827	31.8844	31.5087	23	23	23	81.1	81.1	81.1	35.076	0	323.31	30164000000	549	3.51738	0.00187096
1379	P68181;P68181-2;P68181-3;P68181-4;H6TMF6;H6TMF5	P68181;P68181-2;P68181-3;P68181-4	cAMP-dependent protein kinase catalytic subunit beta	Prkacb	29.2701	29.37	29.4763	29.6735	29.839	29.3666	29.9772	29.977	29.8295	21	8	8	56.4	29.6	29.6	40.707	0	98.919	4789200000	137	1.83235	0.0340399
1380	P68404-2	P68404-2	Protein kinase C beta type	Prkcb	31.9849	31.766	31.5839	32.1994	32.238	32.0712	32.2186	32.2187	32.0803	40	38	2	62.9	58.7	5.5	76.893	0	260.4	26393000000	478	1.75313	0.0390177
1381	P68510;Q8BJH3;Q3T9U0;REV__Q4W8U9;REV__Q03517	P68510	14-3-3 protein eta	Ywhah	33.0282	33.318	32.8427	32.1693	32.1702	32.0272	33.597	33.5005	33.3561	22	17	16	61.4	54.5	54.5	28.211	0	323.31	60657000000	455	3.8707	0.00106602
1382	P70188-2;P70188;Q3UZA5;Q9CRX5	P70188-2;P70188;Q3UZA5	Kinesin-associated protein 3	Kifap3	27.8021	27.1814	27.697	27.3043	27.2662	27.0906	28.1346	28.3621	27.8636	10	8	8	15.3	13.6	13.6	89.015	0	32.67	991260000	44	1.91121	0.0297005
1383	P70193;B7ZP45;REV__Q80UU5	P70193;B7ZP45	Leucine-rich repeats and immunoglobulin-like domains protein 1	Lrig1	27.613	27.4964	27.3921	26.6444	27.0482	26.3276	28.7883	28.5464	28.3549	26	26	26	31.3	31.3	31.3	119.15	0	59.164	1193300000	78	3.54397	0.00180394
1384	Q14BZ3;P70202	Q14BZ3;P70202	Latexin	Lxn	31.3076	31.677	31.455	30.8605	30.8299	30.7598	32.7835	32.5545	32.5856	7	7	7	42.3	42.3	42.3	25.492	0	302.42	28696000000	287	5.08609	0.000165708
1385	P70206;Q3U3W7	P70206	Plexin-A1	Plxna1	28.6597	28.9467	28.6441	28.5007	28.2248	28.2083	30.0415	30.088	29.827	46	46	35	29.7	29.7	24.2	211.1	0	153.99	3521600000	171	4.47337	0.000414487
1386	P70213;B9VU59;X2FTC5;X2FQP5;Q6JWR1;E3VX21	P70213;B9VU59;X2FTC5;X2FQP5;Q6JWR1	Friend virus susceptibility protein 1	Fv1	26.4098	26.3528	26.4621	26.8072	27.321	27.1281	25.6122	25.2385	23.704	8	8	8	21.8	21.8	21.8	51.996	0	42.912	580150000	34	1.98864	0.0258141
1387	P70227;Q0IJ80	P70227	Inositol 1,4,5-trisphosphate receptor type 3	Itpr3	23.2881	21.6871	24.3761	24.0193	24.1133	28.4612	29.6028	29.2683	29.3354	17	4	4	5.1	1.8	1.8	304.27	0	66.064	3040200000	84	1.9975	0.0254789
1388	P70232-2	P70232-2	Neural cell adhesion molecule L1-like protein;Processed neural cell adhesion molecule L1-like protein	Chl1	29.7923	29.9177	29.7563	29.2234	29.3515	29.2923	30.9113	31.0117	31.1314	40	40	4	48.9	48.9	4.4	129	0	214.12	7575400000	253	6.01837	5.45648e-05
1389	Q543Z5;P70236;Q8BP44;A2AGS2;Q3UU57;Q8C371;Q60521;P70273	Q543Z5;P70236;Q8BP44;A2AGS2;Q3UU57;Q8C371;Q60521	Dual specificity mitogen-activated protein kinase kinase 6	Map2k6	29.3608	29.4524	29.7493	28.1172	27.8553	28.3225	29.7935	29.8938	29.8108	17	17	14	62.6	62.6	53.6	37.432	0	57.43	3100200000	111	4.28992	0.000543336
1390	P70255-2;Q3UHA6;P70255-5;P70255-3;P70255;P70255-4;P70255-7;P70255-6	P70255-2;Q3UHA6;P70255-5;P70255-3;P70255;P70255-4;P70255-7;P70255-6	Nuclear factor 1 C-type;Nuclear factor 1	Nfic	27.1035	28.2138	26.9714	27.7382	28.7437	27.7227	25.6158	25.7153	23.4732	12	8	8	34.4	24.4	24.4	47.775	0	67.746	1430600000	34	1.93303	0.0285725
1391	P70268;P70268-2;D6RH37	P70268;P70268-2;D6RH37	Serine/threonine-protein kinase N1	Pkn1	26.5081	26.3888	26.4398	25.9232	26.1771	26.0733	27.0418	27.1573	26.7516	9	9	9	11.9	11.9	11.9	104.41	0	11.554	418300000	37	3.14778	0.00347348
1392	P70271;Q5SWV3	P70271	PDZ and LIM domain protein 4	Pdlim4	25.4829	25.8641	25.5268	23.462	23.6067	24.1933	25.8828	26.2287	25.836	5	5	5	21.2	21.2	21.2	35.556	0	8.85	168780000	18	3.83232	0.00112771
1393	P70288;Q8BQ10;Q3UXH8	P70288;Q8BQ10;Q3UXH8	Histone deacetylase 2	Hdac2	30.1262	29.6714	28.5771	30.5465	30.5419	30.2175	27.8687	28.2636	27.4825	16	16	9	41.4	41.4	29.1	55.302	0	118.57	4873000000	144	2.5554	0.00960025
1394	Q542P4;P70290;Q684Q6;B7ZCL8;A2AN84;B7ZCL9;B7ZCM0;Q3THA8;D6RFD5;B7ZCM1	Q542P4;P70290;Q684Q6;B7ZCL8;A2AN84	55 kDa erythrocyte membrane protein	Mpp1	29.5035	29.5098	29.8045	29.4371	29.2447	29.1033	30.4215	30.3477	30.033	17	17	17	49.8	49.8	49.8	52.227	0	90.066	5453900000	146	2.83641	0.00584588
1395	P70302;Q3TUX9	P70302	Stromal interaction molecule 1	Stim1	30.0068	30.3144	30.2235	29.8504	29.8653	29.6068	30.9874	30.7326	30.8918	20	20	19	29.1	29.1	26.7	77.566	0	115.94	8884900000	160	3.58939	0.0016816
1396	P70333;Q3UR26;J3QPH6	P70333	Heterogeneous nuclear ribonucleoprotein H2	Hnrnph2	31.2051	30.8079	30.7319	32.0139	31.6094	31.3223	30.3041	29.6301	29.4676	23	11	11	60.6	36.1	36.1	49.279	0	167.52	15406000000	220	2.67617	0.00779096
1397	P70335-2;P70335;Q3UE22;Q3TBE0	P70335-2;P70335	Rho-associated protein kinase 1	Rock1	25.8594	26.2591	26.3882	26.455	26.3032	26.4289	27.1193	27.2354	27.1018	21	13	13	16.6	10.6	10.6	158.04	0	42.961	666370000	32	3.00671	0.00440272
1398	Q8C3Y6;P70340;Q8CC31;Q8C2Z0	Q8C3Y6;P70340;Q8CC31	Mothers against decapentaplegic homolog;Mothers against decapentaplegic homolog 1	Smad1	25.3481	25.3875	25.5835	24.5574	25.177	24.4182	25.9259	25.9758	25.9018	6	4	2	15.2	10.5	7.2	47.811	0	8.929	237430000	18	2.57676	0.00924176
1399	Q7TPS7;P70353;A2A763;Q3U114;A2A762	Q7TPS7;P70353;A2A763;Q3U114	Nuclear transcription factor Y subunit gamma	Nfyc	26.4217	25.2088	26.8073	26.8336	26.8818	26.9463	24.0582	25.1862	23.1557	5	5	5	19.6	19.6	19.6	30.646	0	6.3772	371740000	20	1.96346	0.0269923
1400	Q8BW03;Q8BM84;P70372;Q8BTQ1;Q3TT05;Q8BVF8;Q3UFF9	Q8BW03;Q8BM84;P70372;Q8BTQ1;Q3TT05;Q8BVF8;Q3UFF9	ELAV-like protein;ELAV-like protein 1	Elavl1	31.7256	31.7862	31.9961	32.7404	32.6529	32.6989	30.371	30.5204	30.3871	17	16	16	61.3	58.6	58.6	36.153	0	323.31	23589000000	397	6.41924	3.41515e-05
1401	Q4FE56;P70398;E9PWA9;Q8C7T5;Q8BS89;G3UZS3;Q8BR77;REV__Q3TPL1;REV__Q6DI78;REV__A2AMI7;REV__Q571K9;REV__Q8CI86;REV__Q3TWI4;REV__P51432;REV__Q80XI3-2;REV__Z4YKC4;REV__Q80XI3-4;REV__Q80XI3;REV__A2AMI2;REV__Q80XI3-3	Q4FE56;P70398	Ubiquitin carboxyl-terminal hydrolase;Probable ubiquitin carboxyl-terminal hydrolase FAF-X	Usp9x	31.4134	31.4349	31.1608	31.1303	31.1392	30.9785	31.7305	31.745	31.6832	82	82	59	36.5	36.5	28.3	290.21	0	323.31	17015000000	621	3.06445	0.0039994
1402	Q3TG37;P70441;Q9R1A1;P70441-2	Q3TG37;P70441	Na(+)/H(+) exchange regulatory cofactor NHE-RF;Na(+)/H(+) exchange regulatory cofactor NHE-RF1	Slc9a3r1	30.6548	30.9267	30.7304	30.1613	30.4032	30.1147	30.9421	30.8024	30.9519	21	21	21	55.8	55.8	55.8	38.6	0	182.83	9669400000	199	2.79493	0.00627785
1403	P70451-2;P70451-5;P70451;Q3TZJ5;P70451-3;P70451-4;Q3TME9;Q9CRE2	P70451-2;P70451-5;P70451;Q3TZJ5;P70451-3;P70451-4	Tyrosine-protein kinase Fer	Fer	26.2919	26.3252	25.9398	25.8395	26.1687	25.8503	27.3618	27.0435	27.0833	9	9	8	14.9	14.9	13.5	87.761	0	8.6392	406370000	20	3.25675	0.00288104
1404	P70460	P70460	Vasodilator-stimulated phosphoprotein	Vasp	27.9862	27.6238	28.0663	26.7314	26.9111	26.8979	27.6848	27.3745	27.9823	9	9	9	29.6	29.6	29.6	39.666	0	19.106	946860000	38	2.49728	0.0106332
1405	Q60817;P70670;Q3UK68	Q60817;P70670;Q3UK68	Nascent polypeptide-associated complex subunit alpha;Nascent polypeptide-associated complex subunit alpha, muscle-specific form	Naca	30.4213	30.4431	30.308	30.1557	29.2516	29.5274	28.6208	28.8181	28.6979	5	5	5	32.6	32.6	32.6	23.384	0	127.09	5712100000	95	3.0298	0.00422965
1406	P70698;Q3TPP2	P70698	CTP synthase 1	Ctps1	28.3241	28.6094	28.4717	28.1953	27.8636	28.222	28.6006	28.597	28.6442	20	20	19	44.2	44.2	42.1	66.682	0	57.739	1846600000	87	1.97404	0.0265437
1407	P70704-2;A1L332;F6WYQ5;Q52KQ7;Q8CA15;Q3U9N5;E9Q4J5;F6Q8P7;Q3TRP7;F6QLG1;Q69ZR1	P70704-2;A1L332;F6WYQ5;Q52KQ7;Q8CA15	Phospholipid-transporting ATPase IA;Phospholipid-transporting ATPase	Atp8a1	31.249	31.323	31.3507	31.137	31.0507	30.7339	32.4734	32.2493	32.5123	47	47	1	41.9	41.9	0.9	129.77	0	323.31	20214000000	461	4.24469	0.000579522
1408	P80560;A3KN68;Q3UU93;Q571D4;Q70FG5;Q8C8Z6;REV__Q91Z96-2;REV__Q91Z96	P80560;A3KN68;Q3UU93;Q571D4	Receptor-type tyrosine-protein phosphatase N2;Protein-tyrosine-phosphatase	Ptprn2	27.9347	27.7286	27.8486	28.1788	28.2716	28.1516	28.3201	28.2932	28.3408	21	21	20	27.1	27.1	25.7	111.5	0	61.28	1767600000	101	3.37831	0.00239047
1409	P83877;F8WGE7;Q78JM7	P83877;F8WGE7	Thioredoxin-like protein 4A	Txnl4a	24.9172	24.8311	24.9015	25.2417	24.9287	24.1739	23.7919	24.0173	23.6972	4	4	4	31.7	31.7	31.7	16.786	0	6.34	183690000	15	1.81602	0.0349861
1410	P83917;Q7TPM0;Q9CYJ8	P83917;Q7TPM0;Q9CYJ8	Chromobox protein homolog 1	Cbx1	28.0691	27.7786	28.1151	29.4763	29.306	28.93	25.1044	25.3148	23.8625	9	8	7	54.1	45.4	42.2	21.418	0	24.734	2123300000	50	4.08574	0.000754674
1411	P84084;D3YV25;E9Q2C2;Q6P3A9	P84084	ADP-ribosylation factor 5	Arf5	30.8598	30.8036	30.9758	30.4334	30.2134	30.3659	30.8245	30.8645	31.0639	15	8	7	84.4	51.1	43.3	20.529	0	123.04	9663500000	193	2.94252	0.00490635
1412	P84086	P84086	Complexin-2	Cplx2	31.9698	32.0901	32.1516	31.1276	31.19	31.2956	32.3262	32.6264	32.6769	12	12	8	69.4	69.4	50.7	15.394	0	104.99	25626000000	256	4.32996	0.000512052
1413	Q4FZH7;P84089;G3UW85;Q9DA82;Q9D9P6;Q9D2S9	Q4FZH7;P84089;G3UW85	Enhancer of rudimentary homolog	Erh	31.4126	31.3432	31.2439	32.2815	32.1252	32.1723	29.4152	29.8001	29.6055	7	7	7	54.8	54.8	54.8	12.259	0	280.26	12445000000	121	6.04709	5.43835e-05
1414	Q5FWI9;P84091;Q3TWV4;Q3TH69;Q6A0C9;Q3UCW9	Q5FWI9;P84091;Q3TWV4;Q3TH69;Q6A0C9;Q3UCW9	AP-2 complex subunit mu	Ap2m1	33.8344	33.6468	33.7196	33.12	32.8577	33.0453	33.6273	33.4865	33.7395	30	30	30	69.4	69.4	69.4	49.654	0	323.31	75727000000	1241	3.18693	0.00326413
1415	Q3UDZ1;P84096;B2KKU6	Q3UDZ1;P84096	Rho-related GTP-binding protein RhoG	Rhog	30.9082	31.0196	31.421	32.0098	32.0257	32.1261	29.9272	30.1908	30.4815	13	13	12	69.6	69.6	63.9	21.308	0	218.85	21790000000	266	3.75011	0.00129884
1416	Q3U781;Q9D6W4;P84104-2;P84104;A2A4X6	Q3U781;Q9D6W4;P84104-2;P84104;A2A4X6	Serine/arginine-rich splicing factor 3	Srsf3;Gm12355	31.7098	31.4284	31.2715	31.9694	32.2654	31.9539	30.13	29.742	29.4964	10	9	9	66.1	66.1	66.1	14.203	0	68.858	15658000000	209	4.13521	0.00069996
1417	P86046;G3UX25	P86046	Inward rectifier potassium channel 13	Kcnj13	27.879	26.9137	26.3796	22.8706	23.7102	22.5379	25.2959	22.8541	23.2585	6	6	6	16.9	16.9	16.9	40.564	0	23.203	202920000	21	2.36534	0.0133451
1418	P97300;P97300-1;H3BIX4;Z4YLB7;H3BKA7;P97300-4	P97300;P97300-1;H3BIX4;Z4YLB7	Neuroplastin	Nptn	33.4002	33.3118	33.1694	32.9194	33.0283	33.0988	33.9632	34.0012	33.8312	18	18	7	44.3	44.3	23.9	44.373	0	323.31	74384000000	644	4.10231	0.000735709
1419	P97300-3	P97300-3	Neuroplastin	Nptn	30.5567	30.5512	29.5957	30.1475	30.7741	30.2606	31.5697	31.3196	31.2123	13	2	2	33.9	4.7	4.7	30.821	0	99.906	16121000000	123	1.63186	0.048292
1420	P97346;P97346-2	P97346;P97346-2	Nucleoredoxin	Nxn	26.2902	26.6096	26.5922	26.3631	26.2466	26.4114	27.568	27.5909	27.799	9	9	9	33.8	33.8	33.8	48.343	0	46.03	728740000	44	4.37344	0.000484331
1421	Q545H8;P97348;G3X9Y4	Q545H8;P97348;G3X9Y4	Rho-related GTP-binding protein RhoD	Rhod	24.6041	25.3679	25.5278	23.7761	23.0023	23.3209	25.5324	26.4859	25.653	5	5	5	25.7	25.7	25.7	23.562	0.00030175	4.5394	162710000	16	2.80754	0.00614229
1422	Q564F3;Q3UAC2;P97351;Q9D1S3;Q3UJU5;Q3U5P8	Q564F3;Q3UAC2;P97351;Q9D1S3;Q3UJU5;Q3U5P8	40S ribosomal protein S3a	Rps3a1;Rps3a	32.8607	32.755	32.4383	32.811	32.8167	32.5273	32.0427	32.1009	31.7708	25	25	25	68.9	68.9	68.9	29.885	0	276.74	30337000000	433	2.33502	0.0140315
1423	Q545H7;P97352	Q545H7;P97352	Protein S100-A13	S100a13	28.9526	29.2701	29.204	29.2302	29.3449	28.8624	29.978	29.631	29.6547	8	8	8	58.2	58.2	58.2	11.158	0	71.215	3909700000	95	1.76847	0.0379967
1424	P97355;E9PZ58;A2AC81	P97355;E9PZ58	Spermine synthase	Sms	29.4518	29.3788	29.3776	29.0655	28.8247	28.942	29.1287	28.695	28.8917	19	19	19	64.2	64.2	64.2	41.313	0	90.919	2869600000	101	1.99406	0.0256322
1425	Q3V3M3;Q78P92;P97376	Q3V3M3;Q78P92;P97376	Protein FRG1	Frg1	26.7372	26.4059	26.1527	26.7266	27.036	27.1944	24.4093	24.5945	23.7841	6	6	6	32.8	32.8	32.8	25.801	0	27.277	536260000	23	3.91921	0.000986767
1426	Q3U541;P97379;Q3U6B1;Q3U931;Q542W3;P97379-2;Q5DU21	Q3U541;P97379;Q3U6B1;Q3U931;Q542W3;P97379-2	Ras GTPase-activating protein-binding protein 2	G3bp2	30.4448	30.2297	30.217	30.3798	30.6238	30.2295	29.495	29.3178	29.2075	18	18	17	46.7	46.7	44.2	54.087	0	143.83	5727200000	183	3.48206	0.00199385
1427	P97384;D3Z7U0	P97384;D3Z7U0	Annexin A11;Annexin	Anxa11	27.3887	26.7771	27.1662	27.5541	27.0114	27.2109	26.3471	25.9267	26.6013	12	12	12	28.4	28.4	28.4	54.079	0	35.114	876300000	48	1.75074	0.0391536
1428	Q3UHN4;P97445;E9Q1R5;Q8R5M7;Q3UHA5;Q8R5M6;Q8C734;Q9R0P8;Q76N29;F7C9S8;A6H690	Q3UHN4;P97445;E9Q1R5;Q8R5M7;Q3UHA5;Q8R5M6	Voltage-dependent P/Q-type calcium channel subunit alpha-1A	Cacna1a	31.3224	31.2404	31.3634	30.4238	30.6035	30.6708	32.3852	32.3482	32.3582	71	71	63	34.6	34.6	31.3	267.63	0	323.31	17660000000	548	6.23624	4.31769e-05
1429	P97449;Q3UP74;Q3TB69	P97449;Q3UP74;Q3TB69	Aminopeptidase N	Anpep	29.2594	29.3832	29.3671	28.8589	28.7762	28.9116	29.2123	29.1363	29.2627	24	24	24	34	34	34	109.65	0	187.58	3003500000	146	3.56361	0.00175123
1430	P97450;E9QAD6;Q812D0	P97450;E9QAD6	ATP synthase-coupling factor 6, mitochondrial	Atp5j	30.7182	30.8376	30.7229	31.3504	31.3971	31.3558	30.6815	30.2888	30.3569	8	8	8	50.9	50.9	50.9	12.496	0	168.75	15560000000	164	3.48086	0.00199749
1431	Q3TIJ5;Q3TJZ5;P97452;Q3THV0	Q3TIJ5;Q3TJZ5;P97452;Q3THV0	Ribosome biogenesis protein BOP1	Bop1	25.0827	24.9964	25.2565	25.5056	26.1625	25.7894	24.4609	23.9143	22.7688	6	6	6	13.8	13.8	13.8	83.124	0	9.3037	178030000	17	2.08298	0.0219193
1432	Q5MJ56;P97479-2;P97479	Q5MJ56;P97479-2;P97479	Unconventional myosin-VIIa	Myo7a	24.9581	25.5529	25.5474	22.9582	22.8327	22.6167	22.8774	22.7954	24.2021	7	7	7	3.6	3.6	3.6	250.32	0.0016543	2.7091	72973000	8	2.73126	0.0070621
1433	Q3TEF1;P97494;Q3UNA7;Q9QZG5	Q3TEF1;P97494;Q3UNA7	Glutamate--cysteine ligase catalytic subunit	Gclc	28.7537	28.9398	28.995	28.6525	28.5622	28.7095	29.1011	29.1689	28.986	20	20	20	36.1	36.1	36.1	72.571	0	153.13	2591100000	117	2.32425	0.0142584
1434	Q53X20;Q8C991;P97737;Q8R209	Q53X20;Q8C991;P97737;Q8R209	Bone morphogenetic protein 3;Growth/differentiation factor 10	Gdf10	27.2814	27.3862	27.6087	23.473	23.8198	24.0438	27.9669	28.3703	28.2486	11	11	11	29.8	29.8	29.8	52.49	0	115.86	837700000	39	6.12187	4.99431e-05
1435	Q544A1;P97765;A2A860;Q3TRG5;Q9DBP6	Q544A1;P97765;A2A860;Q3TRG5;Q9DBP6	WW domain-binding protein 2	Wbp2	29.7911	29.3684	29.4182	29.475	29.216	29.2367	30.0783	30.0962	29.9137	8	8	8	33	33	33	28.032	0	32.78	3612500000	89	2.30465	0.0147471
1436	P97772;Q3V0U2;P97772-3;Q4VA56;E9QMC2;B2BH30;Q3UVX5;F6WSV0;B7ZMP7;F6YJ89;Q3UVX5-2	P97772;Q3V0U2	Metabotropic glutamate receptor 1	Grm1	31.9696	31.9106	31.9432	30.116	30.0811	30.0706	32.9926	32.9708	33.0066	47	47	12	44.8	44.8	16.8	133.21	0	323.31	28031000000	726	10.6949	1.32143e-07
1437	P97772-2	P97772-2	Metabotropic glutamate receptor 1	Grm1	22.586	23.7574	22.8854	24.299	23.729	23.1814	25.9747	26.2952	26.4994	37	2	2	39.1	2	2	101.71	0.00044897	4.341	152050000	6	3.26214	0.00285909
1438	P97807-2;P97807;H3BKG7	P97807-2;P97807	Fumarate hydratase, mitochondrial	Fh	33.9244	33.8393	33.5486	34.2912	34.4344	34.1852	33.9993	34.0384	33.9117	30	30	30	74.3	74.3	74.3	50.052	0	323.31	113020000000	1423	2.0102	0.0249863
1439	Q3TX26;P97822-2;P97822;E9Q5H2;E9PZF5;E9Q0X5;E9Q2G1	Q3TX26;P97822-2;P97822;E9Q5H2;E9PZF5	Acidic leucine-rich nuclear phosphoprotein 32 family member E	Anp32e	30.3899	30.0665	30.0701	30.437	30.2366	30.3001	28.3645	28.4206	28.3093	7	7	7	30.4	30.4	30.4	29.623	0	323.31	4557500000	126	5.63032	7.98642e-05
1440	P97855;Q571F9;Q3UR88	P97855;Q571F9;Q3UR88	Ras GTPase-activating protein-binding protein 1	G3bp1	29.063	29.4478	29.0426	28.4623	28.6993	28.4891	27.7897	28.1265	27.9169	14	13	13	38.7	36.1	36.1	51.828	0	37.314	1661900000	74	3.3203	0.00260913
1441	P97865;F6QU40;B7ZNK8	P97865;F6QU40;B7ZNK8	Peroxisomal targeting signal 2 receptor	Pex7	25.5427	25.4106	25.5008	25.2443	25.1018	25.1509	25.5502	25.9728	25.7434	4	4	4	18.6	18.6	18.6	35.502	0.00058454	3.8193	197000000	11	2.28868	0.0151617
1442	P97872;Q3TRA1;Q3UV28	P97872;Q3TRA1;Q3UV28	Dimethylaniline monooxygenase [N-oxide-forming] 5	Fmo5	25.8564	25.4851	25.364	24.612	24.462	24.9916	26.0751	26.1822	25.8496	5	5	4	11.1	11.1	9.8	60	0	8.7292	233110000	17	2.90508	0.00521457
1443	P97930;D3Z3R3;Q6GRA7;P97930-2	P97930;D3Z3R3	Thymidylate kinase	Dtymk	28.3093	28.2916	28.4653	27.8929	28.1327	28.2587	28.9993	28.6479	28.7134	9	9	9	44.8	44.8	44.8	23.914	0	54.869	1729000000	77	2.25935	0.0159692
1444	Q3SXA7;P97950	Q3SXA7;P97950	Ras-related protein Rab-33A	Rab33a	28.7049	28.8677	28.7809	27.0965	27.379	27.4917	29.2396	29.1612	29.2707	10	10	8	48.9	48.9	44.3	26.54	0	43.148	2100400000	78	5.31211	0.000122242
1445	P98191	P98191	Phosphatidate cytidylyltransferase 1	Cds1	29.2861	29.0839	29.3072	29.0996	29.5913	29.2139	30.2355	30.049	30.0776	13	13	11	24.3	24.3	20.6	52.875	0	114.78	5211500000	155	2.87352	0.0054915
1446	P98203-2;P98203;P98203-3;P98203-4;P98203-5;Q80WW5	P98203-2;P98203;P98203-3;P98203-4;P98203-5	Armadillo repeat protein deleted in velo-cardio-facial syndrome homolog	Arvcf	27.9308	28.2713	28.1372	29.3853	28.9519	29.2543	28.0287	28.0526	27.993	26	26	26	36.6	36.6	36.6	104.21	0	147.34	2083300000	128	3.6945	0.00141925
1447	P99027	P99027	60S acidic ribosomal protein P2	Rplp2	31.1638	31.3147	31.8481	31.9249	31.9958	32.1125	30.0301	30.386	30.4449	8	8	8	80.9	80.9	80.9	11.651	0	244.95	17829000000	220	3.36919	0.00242427
1448	P99028;Q8BMU6	P99028	Cytochrome b-c1 complex subunit 6, mitochondrial	Uqcrh	30.1258	30.3972	30.2406	30.8394	30.9533	30.9703	30.004	29.6499	29.8187	5	5	5	57.3	57.3	57.3	10.435	0	323.31	9982200000	145	3.74094	0.00132215
1449	Q6HAA1;Q00422;Q91YY8;Q6WJ14;Q9CT91	Q6HAA1;Q00422;Q91YY8	GA-binding protein alpha chain	Gabpa	27.2814	26.7439	26.1632	27.2459	27.2304	27.0096	24.6715	24.5954	24.3604	10	10	10	29.5	29.5	29.5	51.363	0	34.468	561660000	28	3.73617	0.00132936
1450	Q543R4;Q00493	Q543R4;Q00493	Carboxypeptidase E	Cpe	29.6442	29.4102	29.2569	29.731	29.6057	29.5117	29.8972	30.0518	29.8865	20	20	20	48.3	48.3	48.3	53.255	0	126.73	4760700000	129	1.92846	0.0287994
1451	Q790Y8;Q00612;A3KG36;REV__Q9D5Q8-2	Q790Y8;Q00612;A3KG36	Glucose-6-phosphate 1-dehydrogenase;Glucose-6-phosphate 1-dehydrogenase X	G6pdx	31.5045	31.4566	31.3154	31.0026	31.1105	30.8441	31.4736	31.8086	31.5298	33	33	0	67.6	67.6	0	59.262	0	281.68	16782000000	463	2.35168	0.0136427
1452	Q3V2G1;Q00623;Q58EV2;CON__P15497	Q3V2G1;Q00623;Q58EV2	Apolipoprotein A-I;Proapolipoprotein A-I;Truncated apolipoprotein A-I	Apoa1	29.2842	29.3082	29.2629	28.4194	27.9761	28.5697	28.0972	27.9449	28.3342	18	18	18	64	64	64	30.684	0	89.213	2837900000	78	2.94803	0.00487331
1453	Q00897	Q00897	Alpha-1-antitrypsin 1-4	Serpina1d	26.9428	26.2847	26.2874	25.1498	25.0513	24.9518	24.6845	25.4067	23.2769	10	4	3	27.1	11.9	9.4	45.998	0	5.6922	284560000	17	1.63672	0.0478461
1454	Q8C6B5;Q00899;Q3TLF0;Q3TTC2;E9QK22;P22227	Q8C6B5;Q00899;Q3TLF0	Transcriptional repressor protein YY1	Yy1	26.1189	25.6639	25.0747	26.8508	27.1514	27.2495	24.8686	24.6319	22.7799	5	5	5	24	24	24	32.991	0	8.6617	436100000	20	2.12958	0.0202556
1455	Q58EU7;Q00915	Q58EU7;Q00915	Retinol-binding protein 1	Rbp1	26.545	26.5004	26.4101	24.2912	24.5247	24.4282	25.5128	25.7274	25.6818	4	4	4	29.6	29.6	29.6	15.846	0	11.441	246810000	12	6.06267	5.34568e-05
1456	Q00PI9;Q8BIQ7;REV__E9Q6B2	Q00PI9	Heterogeneous nuclear ribonucleoprotein U-like protein 2	Hnrnpul2	32.9057	33.0007	32.9307	33.4727	33.7643	33.7716	31.4598	31.4464	31.1596	43	43	42	46.3	46.3	46.3	84.939	0	323.31	44420000000	735	5.54979	9.00392e-05
1457	Q62347;Q8VDJ8;Q543W0;Q547S9;Q01147-2;Q01147;P70300;Q61442	Q62347;Q8VDJ8;Q543W0;Q547S9;Q01147-2;Q01147;P70300;Q61442	Cyclic AMP-responsive element-binding protein 1	Creb1;CREB	27.9609	27.6643	27.3444	28.222	28.117	28.2637	25.2972	24.9498	23.2655	5	5	3	20.9	20.9	15.3	30.959	0	24.576	1045100000	26	3.04162	0.00415059
1458	Q3TX57;Q3TU64;Q01149;Q3TUE2;Q3TP88;Q91VL4;E0CXI2	Q3TX57;Q3TU64;Q01149;Q3TUE2;Q3TP88;Q91VL4	Collagen alpha-2(I) chain	Col1a2	28.619	27.5736	27.3958	23.3697	25.7194	24.9016	28.9166	28.535	27.6163	8	8	8	7.3	7.3	7.3	129.56	0	21.509	1217700000	28	2.38292	0.012969
1459	Q9EP98;Q01279;Q9ERV6;Q9WVF5	Q9EP98;Q01279;Q9ERV6;Q9WVF5	Receptor protein-tyrosine kinase;Epidermal growth factor receptor	Egfr	28.4164	28.6291	28.4789	28.8699	28.7423	28.2088	29.3215	29.2293	29.3447	19	19	18	19.6	19.6	18.6	134.84	0	45.243	1978900000	87	2.09969	0.0213165
1460	Q01721;Q7TNT6	Q01721;Q7TNT6	Growth arrest-specific protein 1	Gas1	23.4519	23.971	24.3649	22.4853	22.6351	23.4397	24.4564	23.9228	24.6683	2	2	2	8.2	8.2	8.2	35.694	0	6.0186	58331000	3	1.76544	0.0381984
1461	Q3TLW5;Q02013	Q3TLW5;Q02013	Aquaporin-1	Aqp1	29.4742	27.4618	27.6195	25.2301	25.2619	24.69	25.8525	22.6621	23.2069	3	3	3	14.5	14.5	14.5	28.792	0	8.8456	431160000	19	1.94314	0.028062
1462	Q02105	Q02105	Complement C1q subcomponent subunit C	C1qc	26.104	25.9292	27.7812	26.6057	27.2503	26.9127	24.5783	25.0021	24.6267	5	5	5	25.2	25.2	25.2	25.991	0	13.166	491450000	20	1.95423	0.0274683
1463	Q02257	Q02257	Junction plakoglobin	Jup	29.8337	30.2007	30.1544	29.6823	29.761	29.7502	30.3403	30.3684	30.3697	35	30	30	62	56.4	56.4	81.8	0	188.81	6324600000	216	2.71751	0.00723467
1464	Q02357-6;Q02357-5;D3Z5M4;E9QNT8;Q02357;Q0VGY9;Q02357-4;G8JL84;Q02357-3	Q02357-6;Q02357-5;D3Z5M4;E9QNT8;Q02357;Q0VGY9;Q02357-4;G8JL84;Q02357-3	Ankyrin-1	Ank1	33.3907	33.4762	33.3784	33.9828	33.9211	34.0025	33.538	33.6163	33.6248	97	91	4	62.2	60.1	1.2	209.55	0	323.31	74050000000	1337	4.65453	0.000307259
1465	S4R2C4;Q02384;Q9QYS6	S4R2C4;Q02384	Son of sevenless homolog 2	Sos2	25.5363	25.2385	25.6265	25.2881	25.0286	25.0355	25.6567	25.7235	26.116	14	9	9	13.8	9	9	149.15	0	8.1737	283210000	14	1.82978	0.0341455
1466	Q02614	Q02614	SAP30-binding protein	Sap30bp	26.6698	26.7717	26.3549	27.3885	26.9804	26.5396	25.0959	25.039	23.4668	5	5	5	19.8	19.8	19.8	33.832	0	8.7094	392910000	19	2.28437	0.0152853
1467	Q02780-3;B1AUB9;Q6DI81;Q02780-7;Q02780-4;Q02780;B1AUC0;Q3UTK6;Q02780-2;Q69ZJ5;Q02780-5;Q05B39;B1AUB8;F7CDR2;Q02780-6;B1AUB6	Q02780-3;B1AUB9;Q6DI81;Q02780-7;Q02780-4;Q02780;B1AUC0;Q3UTK6;Q02780-2;Q69ZJ5;Q02780-5;Q05B39;B1AUB8;F7CDR2;Q02780-6	Nuclear factor 1 A-type;Nuclear factor 1	Nfia	30.044	29.9289	30.3468	30.905	31.4957	31.3683	28.5849	28.3068	28.3448	20	20	15	60.5	60.5	49.3	55.051	0	158.24	7356300000	167	4.73965	0.000270328
1468	Q02819;Q8BRD3;Q3TCI1;H3BK79;D3Z7D7;D3Z1N1	Q02819;Q8BRD3;Q3TCI1;H3BK79	Nucleobindin-1	Nucb1	28.9411	28.8617	28.8319	28.8452	28.7152	29.0217	27.9267	28.1888	28.3347	21	21	20	52.3	52.3	52.3	53.408	0	159.29	2346000000	107	2.77901	0.00646578
1469	Q03141-3;Q03141;Q9JKE5;Q03141-2;Q5DTG3;Q9CW99;Q91Y96	Q03141-3;Q03141;Q9JKE5;Q03141-2	MAP/microtubule affinity-regulating kinase 3	Mark3	29.3738	29.3184	29.4898	28.4245	28.7122	28.6792	29.5023	29.5689	29.518	32	22	17	49.6	36.4	30.9	83.208	0	81.515	3340900000	145	4.0976	0.000741634
1470	Q03265;D3Z6F5;D6RJ16	Q03265;D3Z6F5	ATP synthase subunit alpha, mitochondrial;ATP synthase subunit alpha	Atp5a1	37.1038	37.2841	37.1007	37.059	37.1476	37.2146	36.7938	36.7472	36.7851	46	46	37	72.2	72.2	64.7	59.752	0	323.31	915430000000	6596	2.86432	0.00556725
1471	Q03517;Q4W8U9	Q03517;Q4W8U9	Secretogranin-2;Secretoneurin;Manserin	Scg2	28.5282	28.3661	27.9804	28.2283	28.3415	28.1324	27.6193	27.8979	27.3976	18	18	18	34.5	34.5	34.5	70.643	0	51.54	1819700000	101	1.65633	0.0463348
1472	Q04447	Q04447	Creatine kinase B-type	Ckb	36.98	37.0295	37.1174	36.3303	36.366	36.5262	36.7407	36.9659	37.2024	28	27	25	85.3	83.7	81.6	42.713	0	323.31	979550000000	6457	2.38703	0.0128838
1473	Q3UG03;Q3UEE0;Q04519;Q8K011	Q3UG03;Q3UEE0;Q04519;Q8K011	Sphingomyelin phosphodiesterase	Smpd1	27.7188	27.8983	27.5686	27.5696	28.0145	27.9322	26.6777	26.6305	26.5698	10	10	10	21.2	21.2	21.2	69.944	0	21.031	782170000	44	3.66415	0.00148068
1474	Q04690-2;Q04690;Q04690-4;Q04690-3;Q3TYD2;Q8CCE8;Q5SYH9;Q8BQG3	Q04690-2;Q04690;Q04690-4;Q04690-3	Neurofibromin	Nf1	31.1696	31.0837	31.0322	30.8287	30.7837	30.8132	31.5804	31.5771	31.4949	93	93	93	38.5	38.5	38.5	317.22	0	323.31	11990000000	531	5.23722	0.000135394
1475	Q3TM24;Q91WP4;Q543G3;Q04735-2;Q04735;Q3UPI3	Q3TM24;Q91WP4;Q543G3;Q04735-2;Q04735;Q3UPI3	Cyclin-dependent kinase 16	Cdk16	27.9966	28.1106	28.1354	27.3458	27.8445	27.4775	28.5284	28.3396	28.3401	18	17	12	43	41.2	29.5	52.718	0	26.302	1526100000	80	2.62812	0.00848208
1476	Q8CBP1;Q3TJI7;Q04736;Q8C762;Q8C6U9;Q6GTF2;P14234	Q8CBP1;Q3TJI7;Q04736;Q8C762	Non-specific protein-tyrosine kinase;Tyrosine-protein kinase Yes	Yes1	29.8287	29.4123	29.1727	29.4553	29.8125	29.2732	30.611	30.8118	30.5099	23	18	15	59.3	51	45.8	60.657	0	54.503	5533700000	127	2.59908	0.00888283
1477	Q04750;Q3TSR2;Q6LBJ1;Q3ULF5;Q9D6H0;B7ZNM9;Q8R4U6;Q3TPX7	Q04750	DNA topoisomerase 1	Top1	30.7148	30.8845	30.3843	31.3868	31.5495	31.4373	29.4079	29.4225	28.9882	31	31	31	37	37	37	90.875	0	221.53	9618900000	272	4.3732	0.000483755
1478	Q04857;Q99LW4;Q8C6Y0;B0LAD9	Q04857;Q99LW4	Collagen alpha-1(VI) chain	Col6a1	28.1885	28.3151	28.6572	24.8411	26.2818	25.4068	28.6189	28.9581	28.6921	14	14	14	18	18	18	108.49	0	49.637	1197800000	71	3.64027	0.00154026
1479	Q0VDL6;Q04899;Q0VDL5	Q0VDL6;Q04899;Q0VDL5	Cyclin-dependent kinase 18	Cdk18	25.0083	25.2869	23.4807	26.7453	27.188	26.9364	23.852	24.1222	24.2798	13	9	9	35.3	25.9	25.9	51.847	0	26.565	249200000	18	2.67061	0.00782944
1480	Q497I3;Q05816;Q3TLH6	Q497I3;Q05816;Q3TLH6	Fatty acid-binding protein, epidermal	Fabp5	30.2651	30.2212	30.2754	30.9979	30.796	31.0817	30.4929	30.556	30.6714	15	15	15	84.4	84.4	84.4	15.137	0	290.07	10733000000	246	3.36219	0.0024509
1481	Q059T9;Q9DAW6;Q8BTJ0;Q80WA7	Q059T9;Q9DAW6;Q8BTJ0;Q80WA7	U4/U6 small nuclear ribonucleoprotein Prp4	Prpf4	28.2563	28.625	28.5316	29.2086	29.4309	29.3279	26.3111	26.2777	26.388	17	17	17	47.4	47.4	47.4	58.369	0	64.012	1999700000	93	6.41725	3.33939e-05
1482	Q059U9;Q9DBR0	Q059U9;Q9DBR0	A-kinase anchor protein 8	Akap8	26.4278	26.539	26.5124	27.9569	28.3503	27.2017	25.0844	25.3209	22.7377	13	13	13	25.8	25.8	25.8	76.293	0	17.124	655720000	31	2.04889	0.0232383
1483	Q05CJ7;Q05DK2;Q62018;Q62018-3;Q62018-2	Q05CJ7;Q05DK2;Q62018;Q62018-3;Q62018-2	RNA polymerase-associated protein CTR9 homolog	Ctr9	27.6262	27.3925	26.6513	28.3628	28.2541	28.036	25.8286	25.5391	25.0489	16	16	16	20.3	20.3	20.3	107.68	0	122.89	938740000	53	3.4485	0.00211876
1484	Q05CL8;I3PQW3;A2AMD0;Q05CL8-2;A3KML4	Q05CL8;I3PQW3;A2AMD0	La-related protein 7	Larp7;Gm12666	27.9969	28.4126	27.9744	28.8236	29.0297	28.4567	25.7843	25.7097	25.5716	15	15	15	30.4	30.4	30.4	64.802	0	74.597	1270000000	47	5.13731	0.000157477
1485	Q05DE0;Q9EPJ9;Q3TGS9;Q9EPJ9-2;Q6PB94;Q05BC5	Q05DE0;Q9EPJ9;Q3TGS9;Q9EPJ9-2;Q6PB94;Q05BC5	ADP-ribosylation factor GTPase-activating protein 1	Arfgap1	29.923	30.3623	30.6275	29.7215	29.7049	29.8151	30.8327	31.1765	31.2779	17	17	2	53.1	53.1	6.8	43.307	0	151.13	8068700000	217	2.78242	0.00641907
1486	Q05DR8;Q5D0E0;O88351;Q3U141;Q3USX8;Q3V454;Q8BQA9;F6ULQ4	Q05DR8;Q5D0E0;O88351	Inhibitor of nuclear factor kappa-B kinase subunit beta	Ikbkb	26.3489	26.1587	26.633	25.4152	25.6741	25.3123	26.5297	26.1707	26.3074	9	9	9	16.3	16.3	16.3	81.054	0	95.421	412880000	28	2.6049	0.0087978
1487	Q05DR9	Q05DR9		Maz	28.0166	27.4128	28.6538	28.6152	29.1455	29.0543	26.4156	25.3115	25.1736	11	10	2	68.7	65.4	19	23.834	0	59.459	2072000000	67	3.05232	0.00407514
1488	Q06138;Q8K312;D3Z704;D3YV52	Q06138;Q8K312	Calcium-binding protein 39	Cab39	31.0534	30.8394	30.4762	30.5143	30.3928	30.4054	31.1085	31.2198	31.1771	16	16	13	46.6	46.6	39.6	39.842	0	86.825	10122000000	307	2.17832	0.0184832
1489	Q07417;F6RAZ3	Q07417;F6RAZ3	Short-chain specific acyl-CoA dehydrogenase, mitochondrial	Acads	28.9352	28.7378	28.7976	29.3693	29.5573	29.3034	29.5457	29.418	29.4232	16	16	16	49.8	49.8	49.8	44.889	0	163.06	4397500000	161	3.29041	0.00273128
1490	Q08331;Q8CCS7	Q08331;Q8CCS7	Calretinin	Calb2	33.7987	33.3447	33.4344	34.179	34.1755	33.9004	34.4054	34.4957	34.3936	26	26	25	78.6	78.6	74.5	31.372	0	323.31	89262000000	920	2.74845	0.00685572
1491	Q3U2Z5;Q08509;Q3UGL1;Q3UFL4;Q3TMV3;D3Z5I5;D3Z7F4	Q3U2Z5;Q08509;Q3UGL1;Q3UFL4;Q3TMV3	Epidermal growth factor receptor kinase substrate 8	Eps8	30.1339	30.002	29.9091	30.217	29.9866	30.224	30.6794	30.7856	30.6055	21	21	21	31.4	31.4	31.4	94.484	0	112.34	8713000000	94	3.10576	0.00373174
1492	Q3TBF1;Q08642;A3KME9;Q9Z183	Q3TBF1;Q08642;A3KME9	Protein-arginine deiminase type-2	Padi2	28.3147	28.5131	28.8924	30.5101	30.3116	30.4106	26.6207	26.4966	26.3242	26	26	25	43.2	43.2	42.3	76.219	0	323.31	3759600000	139	5.98909	5.41331e-05
1493	Q09XV5;F7AL76;Q09XV5-2	Q09XV5;F7AL76	Chromodomain-helicase-DNA-binding protein 8	Chd8	25.4516	25.9564	25.1819	26.5362	27.3558	26.5368	24.5082	24.0594	23.8268	18	17	13	9.8	9.5	7.9	290.84	0	17.41	398480000	24	3.21597	0.00310541
1494	Q0GA42	Q0GA42	Metal transporter CNNM1	Cnnm1	27.9768	28.2295	27.9179	27.9645	27.874	27.654	28.9968	28.6423	28.7698	22	21	8	28.9	28.3	12.9	103.98	0	73.842	1925400000	103	3.0276	0.00423941
1495	Q0KK55;B2RX11;F6SPU5;D3Z5B8;Q0KK55-3;D3Z3X0;Q0KK55-2;A2A258;Q2EG98-5;Q2EG98-8;Q2EG98-2;Q2EG98;Q2EG98-3;Q2EG98-4	Q0KK55;B2RX11;F6SPU5;D3Z5B8	Protein very KIND	Kndc1	28.284	27.7307	28.2624	29.5168	29.7129	29.8599	24.4068	26.6852	25.5051	40	40	40	31.2	31.2	31.2	191.31	0	120.93	2476600000	129	3.03582	0.00420054
1496	Q0KL02;Q0KL02-4;Q0KL02-3;Q0KL02-2;Q99N72;Q8C067;Q7TNJ5;A2AET8;Q8BLE2;A2AEU1	Q0KL02;Q0KL02-4;Q0KL02-3;Q0KL02-2	Triple functional domain protein	Trio	31.1158	30.9075	30.8372	30.1427	30.2396	29.9757	31.9153	31.8039	31.7599	73	73	62	27.1	27.1	23.8	347.86	0	323.31	12536000000	493	5.07931	0.000165758
1497	Q0P5W2;Q8C0L0;A2ARI0	Q0P5W2;Q8C0L0;A2ARI0	Thioredoxin-related transmembrane protein 4	Tmx4	28.0046	28.1037	28.0299	28.7811	29.492	28.7952	28.1177	28.3333	27.7533	7	7	7	26.6	26.6	26.6	37.131	0	48.815	2065900000	54	2.00952	0.0249963
1498	Q0P6B2;Q3UUU2;Q91WJ8;Q91WJ8-2;Q3TIS5	Q0P6B2;Q3UUU2;Q91WJ8;Q91WJ8-2;Q3TIS5	Far upstream element-binding protein 1	Fubp1	31.0106	30.9593	30.8327	31.0049	31.2356	31.1117	28.9155	28.8902	28.7705	27	24	1	54.2	51.9	3.4	67.195	0	323.31	10687000000	284	6.70152	2.45574e-05
1499	Q0PD14;Q8BHC1;D3YYJ7;Q8R1M8	Q0PD14;Q8BHC1	Ras-related protein Rab-39B	Rab39b	30.296	30.409	30.4794	30.375	30.1528	30.225	30.9904	30.8585	30.8143	13	13	12	62	62	56.8	24.636	0	140.35	10726000000	157	3.26173	0.00285955
1500	Q3TYH2;Q0PD40;Q8K386;Q91YW0;Q3TYB1;D3Z1A7;D3YTZ8;D3YWS1;D3YYX5	Q3TYH2;Q0PD40;Q8K386;Q91YW0;Q3TYB1;D3Z1A7;D3YTZ8;D3YWS1	Ras-related protein Rab-15	Rab15	26.6272	26.2331	25.6856	26.0175	26.0689	26.158	27.3324	27.662	27.2055	9	8	8	50.5	45.3	45.3	24.332	0	45.181	677310000	45	2.47567	0.0110907
1501	Q0PD42;Q9DD03;D3YUS4	Q0PD42;Q9DD03	Ras-related protein Rab-13	Rab13	26.1535	26.0905	25.5799	24.9874	25.4702	25.1531	26.9396	27.4279	26.4194	7	4	4	33.7	20.8	20.8	22.756	0	41.21	421160000	13	2.42626	0.0120783
1502	Q0PD62;Q9CZT8;A2A7Z6	Q0PD62;Q9CZT8;A2A7Z6	Ras-related protein Rab-3B	Rab3b	28.5	28.6762	28.7723	29.5849	29.2196	29.5256	28.0706	28.0881	28.0383	8	6	6	42	35.6	35.6	24.757	0	40.89	2542500000	50	4.2282	0.000596396
1503	Q0QWG9-2;Q0QWG9-3;Q0QWG9	Q0QWG9-2;Q0QWG9-3;Q0QWG9	Delphilin	Grid2ip	30.2844	29.8864	30.4796	28.7539	28.3614	28.3534	31.5825	31.5551	31.6248	33	33	33	45.1	45.1	45.1	112.58	0	318.65	8668600000	248	5.11848	0.000159715
1504	Q0VAV2	Q0VAV2	Exophilin-5	Exph5	24.8319	25.1504	25.1413	26.0818	26.7886	25.9434	23.9242	23.8147	24.8363	13	13	13	8.9	8.9	8.9	217.64	0	21.507	225280000	21	2.52236	0.0101925
1505	Q8C4T8;Q3UTV4;Q0VB45;P48542-2;P48542;Q8C8Y6;P48542-4;P48542-3	Q8C4T8;Q3UTV4;Q0VB45;P48542-2;P48542	G protein-activated inward rectifier potassium channel 2	Kcnj6	26.0052	26.2742	25.7705	27.2808	26.5764	26.7489	23.768	24.9107	25.5494	7	7	5	20.5	20.5	16.7	47.48	0	14.389	372010000	20	1.92772	0.0288271
1506	Q0VBA4;Q9D7S7-2;Q9D7S7	Q0VBA4;Q9D7S7-2;Q9D7S7	60S ribosomal protein L22-like 1	Rpl22l1	26.2102	26.9103	26.691	26.9235	27.2577	27.3013	26.1543	25.8893	26.1235	3	3	3	39.3	39.3	39.3	14.467	0	29.408	692060000	27	2.28402	0.0152839
1507	Q0VBL1	Q0VBL1	Tigger transposable element-derived protein 2	Tigd2	26.2882	26.491	26.4556	27.0946	26.7605	26.9683	22.2965	24.3424	23.8434	9	9	9	24	24	24	59.651	0	15.979	400700000	24	2.97024	0.00469864
1508	Q66JP8;Q7TT82;Q3THK4;Q6PGG1;Q571M7;Q0VBL3;Q3TLX0;A0PJG5;Q8BKT2	Q66JP8;Q7TT82;Q3THK4;Q6PGG1;Q571M7;Q0VBL3;Q3TLX0		Rbm15	28.2993	28.278	28.8392	28.8038	29.0418	29.0848	25.8583	26.9591	26.8129	26	26	22	36	36	33.6	103.81	0	184.68	1675000000	83	3.15662	0.0034368
1509	Q0VBT6;Q6TCG5;J3KMR9;D3Z1S5;F6V7Y9	Q0VBT6;Q6TCG5;J3KMR9;D3Z1S5	Progestin and adipoQ receptor family member 6	Paqr6	24.5318	24.7865	24.7708	23.5739	24.2441	24.2559	25.5713	25.4465	25.8878	5	5	5	16.3	16.3	16.3	38.175	0	9.8942	174750000	22	2.96635	0.00472822
1510	Q0VBU4;Q9D024;Q9D024-2;F7C265;Q9D024-3;B1AR93	Q0VBU4;Q9D024;Q9D024-2;F7C265	Coiled-coil domain-containing protein 47	Ccdc47	28.9288	28.8694	28.6394	29.3759	29.3059	28.9937	28.4999	28.4279	28.4781	20	20	20	48.7	48.7	48.7	55.843	0	96.108	3198700000	104	2.62662	0.00849744
1511	Q0VBU9;Q5FW86;Q6P6K4;Q05CM1;Q3UMZ3-2;Q3UMZ3	Q0VBU9	Phosphatidate phosphatase PPAPDC1A	Ppapdc1a	25.3615	25.9135	23.9343	27.0743	27.0393	27.1327	26.5053	26.6615	26.8129	6	6	6	27.7	27.7	27.7	30.443	0	15.694	669770000	32	1.85726	0.0325684
1512	Q0VEJ0	Q0VEJ0	Centrosomal protein of 76 kDa	Cep76	31.5547	31.4587	31.5997	28.7356	29.1807	29.0371	32.2435	32.2398	31.9793	35	35	35	56.3	56.3	56.3	74.303	0	323.31	14657000000	342	6.09129	5.1505e-05
1513	Q52KI9;Q0VF56;Q3UPC8;Q8BHZ4	Q52KI9;Q0VF56;Q3UPC8;Q8BHZ4	Zinc finger protein 592	Zfp592;Znf592	25.0716	25.3203	25.4914	26.2005	26.0104	26.0001	25.0269	24.0788	23.3858	8	8	8	10.1	10.1	10.1	132.61	0	20.181	269840000	18	2.02905	0.0241039
1514	Q0VFY6;Q80TN5;Q80TN5-2;Q3TRB3	Q0VFY6;Q80TN5;Q80TN5-2	Palmitoyltransferase;Palmitoyltransferase ZDHHC17	Zdhhc17	28.6154	28.6507	29.1854	29.5481	29.4481	29.0392	26.9859	27.0227	26.8533	11	11	11	23.2	23.2	23.2	71.399	0	90.315	2029200000	59	4.29017	0.000543907
1515	Q0VGB7;A4QMV1	Q0VGB7	Serine/threonine-protein phosphatase 4 regulatory subunit 2	Ppp4r2	26.6599	26.1142	25.7218	26.8303	26.8121	25.8673	24.97	25.0159	25.3102	8	8	8	23	23	23	46.478	0	12.945	465810000	19	1.76719	0.038096
1516	Q0VGU4	Q0VGU4		Vgf	25.1758	25.5938	25.7286	26.6418	26.6169	26.6264	24.0403	22.5321	22.7151	7	7	7	19.1	19.1	19.1	68.231	0	43.042	320880000	17	3.42332	0.00221901
1517	Q11011;E9Q039;F6QYF8;E9Q6F4;F7ANF4;F6V7K3;F2Z3V5	Q11011;E9Q039;F6QYF8;E9Q6F4	Puromycin-sensitive aminopeptidase	Npepps	33.7327	33.6017	33.5964	33.095	32.9885	33.081	33.7445	33.5604	33.5761	51	51	51	61.1	61.1	61.1	103.32	0	323.31	60539000000	821	3.77191	0.00125344
1518	Q149A4;Q810B8;Q8BL04;B1AU89	Q149A4;Q810B8	SLIT and NTRK-like protein 4	Slitrk4	24.544	24.7902	24.7235	24.9295	24.9149	25.2706	25.608	25.4862	25.4455	7	7	7	11.6	11.6	11.6	94.537	0	8.8273	204090000	24	2.87678	0.00545727
1519	Q149E6;Q99PH1	Q149E6;Q99PH1	Leucine-rich repeat-containing protein 4	Lrrc4	24.0629	24.3047	24.387	24.9278	24.7259	25.3884	24.3837	24.1946	23.9663	7	6	5	12	9.8	7.8	72.609	0	7.234	128090000	14	1.93446	0.0284997
1520	Q14AG7;Q920N7;E9Q6I4	Q14AG7;Q920N7	Synaptotagmin-12	Syt12	31.2276	31.2709	31.4361	29.6263	29.2146	29.457	32.4266	32.3432	32.3108	28	28	28	73.9	73.9	73.9	46.68	0	323.31	18056000000	373	6.16901	4.76959e-05
1521	Q14AZ9;Q8BGC4;Q8R0Z8;Q3UY81	Q14AZ9;Q8BGC4	Zinc-binding alcohol dehydrogenase domain-containing protein 2	Zadh2	30.0473	29.6401	29.6908	30.3191	30.1117	30.1905	29.7062	29.4821	29.6404	14	14	14	46.9	46.9	46.9	40.528	0	168.92	5608600000	164	2.05123	0.0231596
1522	Q14BB9	Q14BB9	MAP6 domain-containing protein 1	Map6d1	27.8471	27.5386	27.9887	28.5428	28.841	28.9695	26.0597	25.9206	26.562	9	9	9	69.6	69.6	69.6	20.432	0	57.773	1561900000	44	4.20012	0.000622788
1523	Q14BF8;Q5NCF2;B1ASW5;B1ASW6	Q14BF8;Q5NCF2;B1ASW5;B1ASW6	Trafficking protein particle complex subunit 1	Trappc1	28.9736	28.5857	28.7746	27.0856	27.0791	27.5953	28.4121	28.808	28.5415	9	9	9	64.8	64.8	64.8	16.881	0	121.6	1589500000	69	3.38743	0.00235106
[truncated: 1,673 more rows]
